# Supplementary material for: Short-chain reactive probes as tools to unravel the Pseudomonas aeruginosa quorum sensing regulon
Source: Royal Society of Chemistry journal article supplement (doi:10.1039/d0sc04444j), 2021-01-01
Supplement: d0sc04444j1.pdf [file d0sc04444j1.pdf]

## Supplementary information

### Short-Chain Reactive Probes as Tools to Unravel the *Pseudomonas aeruginosa* Quorum Sensing Regulon

Alex Yashkin,<sup>a</sup> Josep Rayo,<sup>a</sup> Larson Grimm,<sup>b</sup> Martin Welch,<sup>b</sup> and Michael M. Meijler<sup>a,\*</sup>

<sup>a</sup> Dept. of Chemistry and the National Institute for Biotechnology in the Negev, Ben-Gurion University of the Negev, Be'er-Sheva 8410501, Israel

<sup>b</sup> Dept. of Biochemistry, University of Cambridge, UK

\*Correspondence E-mail: [meijler@bgu.ac.il](mailto:meijler@bgu.ac.il)

## Table of Contents

|                                                                                                                                                         |    |
|---------------------------------------------------------------------------------------------------------------------------------------------------------|----|
| <b>Abbreviations</b>                                                                                                                                    | 3  |
| <b>Supplemental Experimental section</b>                                                                                                                | 4  |
| <b>Synthetic procedures</b>                                                                                                                             | 4  |
| Synthesis of <b>C<sub>4</sub>-HSL</b> - natural autoinducer <b>1</b> (Scheme S1, Figures S1 & S2)                                                       | 4  |
| Synthesis of <b>2</b> (Scheme S2, Figures S3 & S4)                                                                                                      | 7  |
| Synthesis of <b>3</b> (Scheme S3, Figures S5 & S6)                                                                                                      | 10 |
| Synthesis of <b>4</b> (Scheme S4, Figures S7 & S8)                                                                                                      | 13 |
| Synthesis of <b>5</b> (Scheme S5, Figures S9 & S10)                                                                                                     | 16 |
| Synthesis of <b>6</b> (Scheme S6, Figures S11 & S12)                                                                                                    | 19 |
| Synthesis of <b>7</b> (Scheme S7, Figures S13 & S14)                                                                                                    | 22 |
| Synthesis of <b>8</b> (Scheme S8, Figures S15 & S16)                                                                                                    | 25 |
| Synthesis of <b>9</b> (Scheme S9, Figures S17 & S18)                                                                                                    | 28 |
| Synthesis of <b>10</b> (Scheme S10, Figures S19 & S20)                                                                                                  | 31 |
| Synthesis of <b>11</b> (Scheme S11, Figures S21 & S22)                                                                                                  | 34 |
| Synthesis of <b>12</b> (Scheme S12, Figures S23 & S24)                                                                                                  | 37 |
| Synthesis of <b>13</b> (Scheme S13, Figures S25 & S26)                                                                                                  | 40 |
| Synthesis of <b>14</b> (Scheme S14, Figures S27 & S28)                                                                                                  | 43 |
| <b>Biological evaluation</b>                                                                                                                            | 46 |
| Activation assays - Luminescent Reporter Strain PAO-JP2<br>(pKD- <i>rhIA</i> ) (Figure S29)                                                             | 46 |
| Growth assays (OD <sub>600</sub> ) - <i>P. aeruginosa</i> PAO-JP2 (pKD- <i>rhIA</i> ) (Figure S30)                                                      | 49 |
| Final activation assays for compounds <b>12-14</b> (Luminescence/OD <sub>600</sub> ) –<br><i>P. aeruginosa</i> PAO-JP2 (pKD- <i>rhIA</i> ) (Figure S31) | 52 |
| Luminescence/OD <sub>600</sub> values at 75% activation for each probe<br>compared to C <sub>4</sub> -HSL (Figure S32)                                  | 53 |
| Coomassie images of probes <b>12</b> and <b>13</b> fluorophore labeling (Figure S33)                                                                    | 54 |
| Strain activity comparison (Figure S34)                                                                                                                 | 55 |
| Purification of His <sub>6</sub> -TEV-PhzB1 (Figure S35)                                                                                                | 56 |
| Concentration-dependent His <sub>6</sub> -TEV-PhzB1 labeling (Figure S36)                                                                               | 57 |
| The specificity of labeling toward His <sub>6</sub> -TEV-PhzB1 (Figure S37)                                                                             | 58 |
| C <sub>4</sub> -HSL concentration-dependent competitive labeling of His <sub>6</sub> -TEV-<br>PhzB1 (Figure S38)                                        | 59 |
| Phenazine biosynthetic pathway (Figure S39)                                                                                                             | 60 |
| Supplemental References                                                                                                                                 | 60 |

## Abbreviations

3-oxo-C<sub>12</sub>-HSL- *N*-3-oxododecanoyl homoserine lactone  
ABPP - activity-based protein profiling  
AHL- *N*-acylhomoserine lactone  
AOCHC- 6-amino-5-oxocyclohex-2-ene-1-carboxylic acid  
BSA- bovine serum albumin  
BODIPY- boron-dipyrromethene  
C<sub>4</sub>-HSL- *N*-butyryl-L-homoserine lactone  
CI- Confidence intervals  
CuAAC- copper(I)-catalyzed azide-alkyne cycloaddition  
DCM- dichloromethane  
DHPCA- 5,10-dihydro-PCA  
DHPDC- 5,10-dihydro- PDC  
DMSO- Dimethyl Sulfoxide  
DMF- dimethylformamide  
EC<sub>50</sub>- effective concentration that gives a half-maximal response  
EDC- 1-ethyl-3-(3-dimethylaminopropyl) carbodiimide hydrochloride  
EDTA- ethylenediaminetetraacetic acid  
ESI- electrospray ionization  
EtOAc- ethyl acetate  
FA- formic acid  
HHPDC- hexahydrophenazine-1,6-dicarboxylic acid  
HPLC- high-performance liquid chromatography  
HSL- homoserine lactone  
IAA- Iodoacetamide  
IMAC- Immobilized Metal Affinity Chromatography  
IPTG- Isopropyl β-D-1-thiogalactopyranoside  
kDa- kilodaltons (molecular mass)  
LB- Luria-Bertani broth  
LC-MS- liquid chromatography-mass spectrometry  
MS- mass spectrometry  
NHS- *N*-hydroxysuccinimide  
Ni-NTA- nickel-nitrilotriacetic acid charged affinity resin  
OD<sub>600</sub>- optical density of a sample measured at a wavelength of 600 nm  
OD<sub>520</sub>- optical density of a sample measured at a wavelength of 520 nm  
PBS- phosphate buffered solutions  
PCA- phenazine-1-carboxylic acid  
PDC- phenazine-1,6-dicarboxylic acid  
PP- polypropylene  
PQS- *Pseudomonas* quinolone signal (2-heptyl-3-hydroxy-4-quinolone)  
QS- quorum Sensing  
RPM- revolutions per minute  
SDS-PAGE- sodium dodecyl sulfate-polyacrylamide gel electrophoresis  
SDS- sodium dodecyl sulfate  
StageTips- Stop and Go Extraction Tips  
TBTA- tris [(1-benzyl-1*H*-1,2,3-triazol-4-yl) methyl] amine  
TCEP- tris (2-carboxyethyl) phosphine  
TEA- trimethylamine  
TEV- tobacco etch virus  
THF- tetrahydrofuran  
TLC- thin-layer chromatography  
UV- ultraviolet  
WT- wild type

## Supplemental Experimental section

### Synthetic procedures

#### Synthesis of C<sub>4</sub>-HSL - natural autoinducer 1

(S)-(-)- $\alpha$ -amino- $\gamma$ -butyrolactone hydrobromide (**1**), (176 mg, 9.6 mmol), and Na<sub>2</sub>CO<sub>3</sub>, (254 mg, 2.4 mmol) were partitioned between DCM (2.2 mL) and H<sub>2</sub>O (2.2 mL). Butyryl chloride (**2**), (0.17 mL, 1.7 mmol) was added and the mixture was stirred vigorously at room temperature overnight. The two phase mixture was separated and the aqueous layer extracted with DCM until there was no spot on the TLC plate (EtOAc:DCM, 50/50 v/v). The organic layers were combined, washed with brine, dried over MgSO<sub>4</sub>, and filtered. The solvent was removed by rotary evaporation and separated by column chromatography (EtOAc:DCM, 50/50 v/v) to give *N*-butyryl-*L*-homoserine lactone (C<sub>4</sub>-HSL) as a white solid (55 mg, 33%), (**Scheme S1**).

<sup>1</sup>H NMR (400 MHz, CDCl<sub>3</sub>):  $\delta$  5.97 (br s, 1H), 4.51-4.57 (ddd,  $J$  = 11.6, 8.4, 5.6 Hz, 1H), 4.45-4.49 (t,  $J$  = 9.2 Hz, 1H), 4.25-4.31 (ddd,  $J$  = 11.6, 9.2, 6 Hz, 1H), 2.84-2.90 (m, 1H), 2.21-2.25 (td,  $J$  = 7.2, 1.2 Hz, 2H), 2.06-2.18 (dtd,  $J$  = 12.4, 11.6, 8.8 Hz, 1H), 1.63-1.73 (m, 2H), 0.96 (t,  $J$  = 7.6 Hz, 3H).

<sup>13</sup>C NMR (101 MHz, CDCl<sub>3</sub>):  $\delta$  175.65, 173.70, 66.26, 49.43, 38.20, 30.88, 19.02, 13.83.

LC-MS  $m/z$  calculated for C<sub>8</sub>H<sub>13</sub>NO<sub>3</sub> (M+H): 172.09. Found: 172.02.

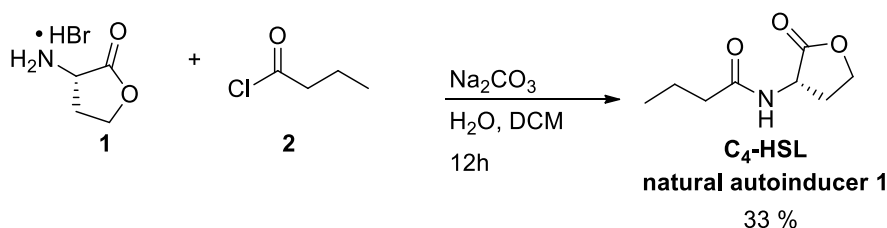

**Scheme S1.** Synthesis of *N*-butyryl-*L*-homoserine lactone (C<sub>4</sub>-HSL), the natural autoinducer of the Rhl system.

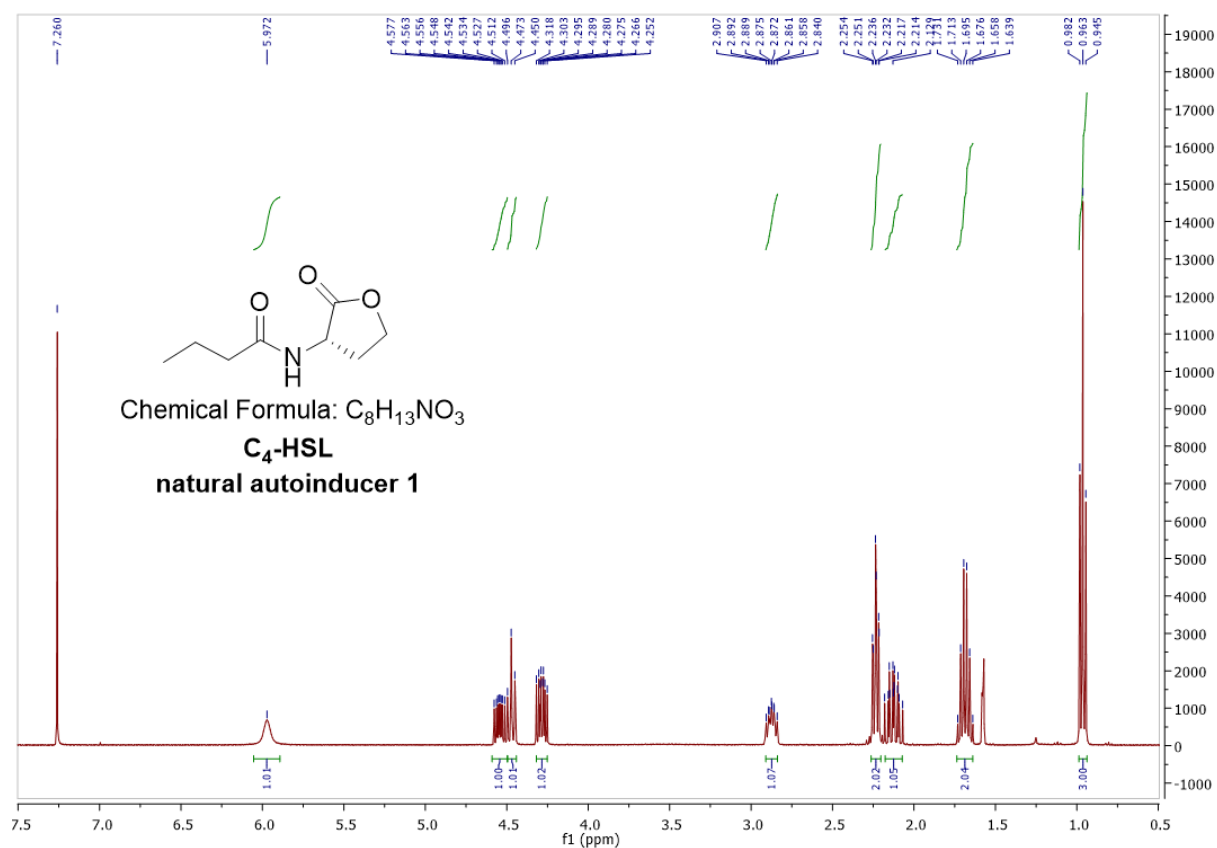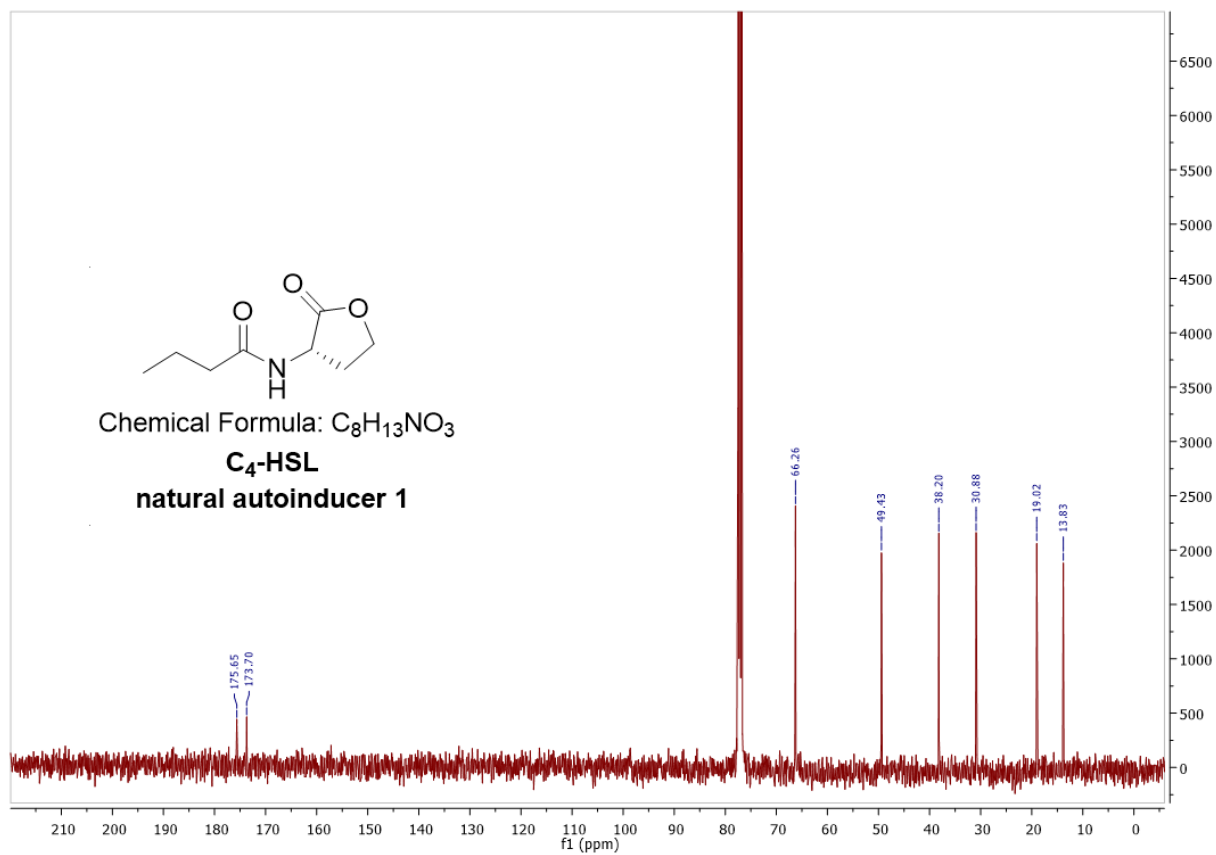

**Figure S1.**  $^1H$  NMR (upper spectrum) and  $^{13}C$  NMR (lower spectrum) of C<sub>4</sub>-HSL - natural autoinducer 1.

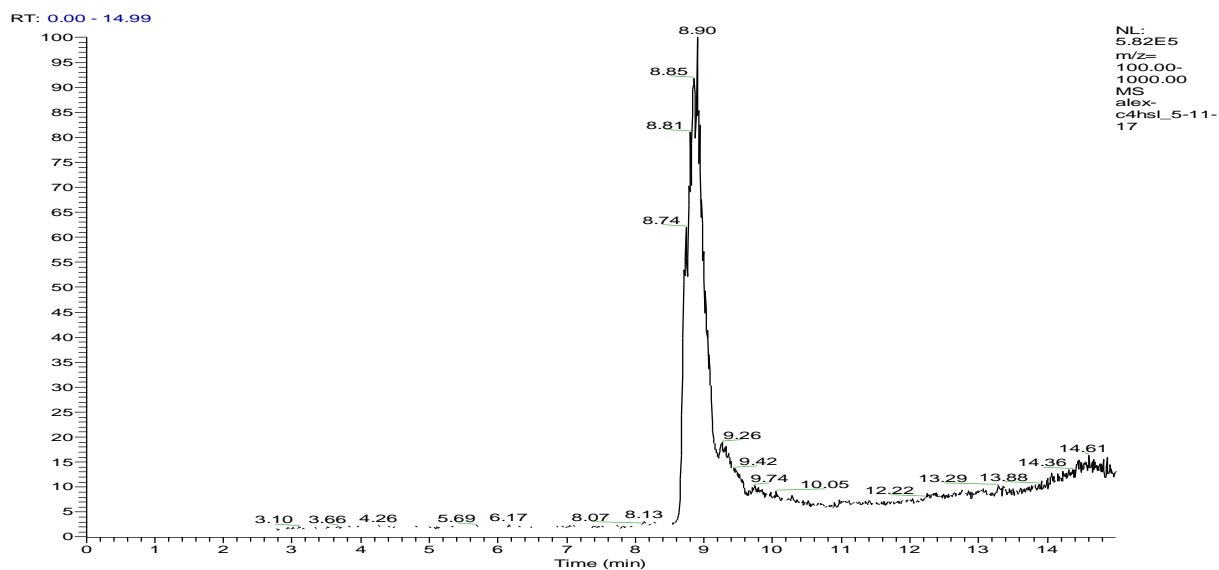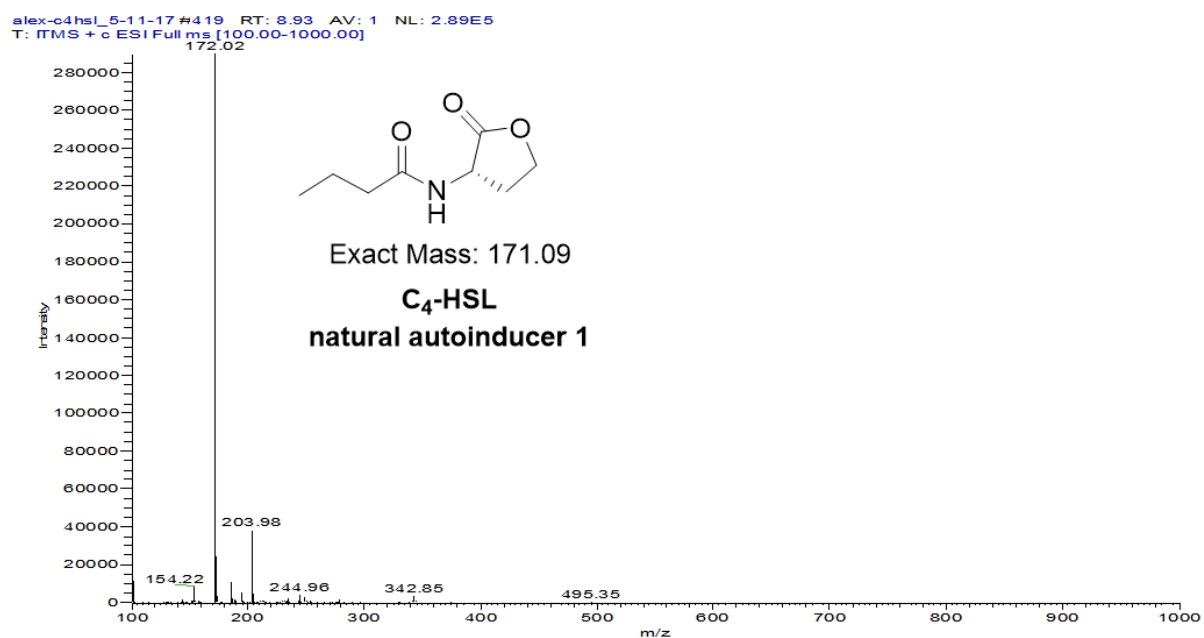

**Figure S2.** LC-MS of C<sub>4</sub>-HSL - natural autoinducer 1.

## Synthesis of 2

To a 50 mL round-bottom flask with a magnetic stirrer were added ultrapure Milli-Q water (34.3 mL), TEA, (0.13 mL, 0.96 mmol), (*S*)-(-)- $\alpha$ -amino- $\gamma$ -butyrolactone hydrobromide (**1**), (176 mg, 0.96 mmol) and pentanoic acid (**2a**), (0.156 mL, 1.44 mmol). EDC·HCl, (276 mg, 1.44 mmol) was added. The reaction mixture was stirred at room temperature for 24 h and extracted with EtOAc. The combined organic layers were extracted with 5% aqueous NaHCO<sub>3</sub>, 1 M KHSO<sub>4</sub> and brine, dried over MgSO<sub>4</sub> and filtered. The solvent was removed by rotary evaporation and separated by column chromatography (EtOAc:DCM, 50/50 v/v) to give *N*-pentanoyl-*L*-homoserine lactone (**2**) as a white solid (24 mg, 14%), (**Scheme S2**).

**<sup>1</sup>H NMR** (400 MHz, CDCl<sub>3</sub>):  $\delta$  6.03 (br s, 1H), 4.51-4.58 (ddd,  $J$  = 11.6, 8.4, 6 Hz, 1H), 4.44-4.49 (t,  $J$  = 9.2 Hz, 1H), 4.25-4.31 (ddd,  $J$  = 11.2, 9.2, 6 Hz, 1H), 2.82-2.89 (m, 1H), 2.23-2.27 (t,  $J$  = 6.8 Hz, 1H), 2.06-2.18 (ddd,  $J$  = 12.8, 11.6, 9.2 Hz, 1H), 1.59-1.66 (quint,  $J$  = 7.2 Hz, 2H), 1.31-1.40 (sext,  $J$  = 7.6 Hz, 2H), 0.90-0.93 (t,  $J$  = 7.6 Hz, 3H).

**<sup>13</sup>C NMR** (101 MHz, CDCl<sub>3</sub>):  $\delta$  175.70, 173.88, 66.26, 49.41, 36.05, 30.83, 27.63, 22.46, 13.91.

**LC-MS**  $m/z$  calculated for C<sub>9</sub>H<sub>15</sub>NO<sub>3</sub> (M+H): 186.11. Found: 186.02.

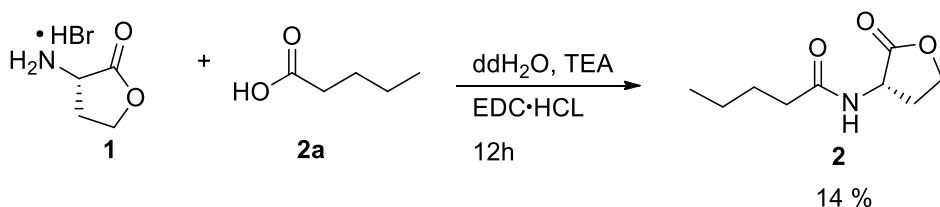

**Scheme S2.** Synthesis of **2**.

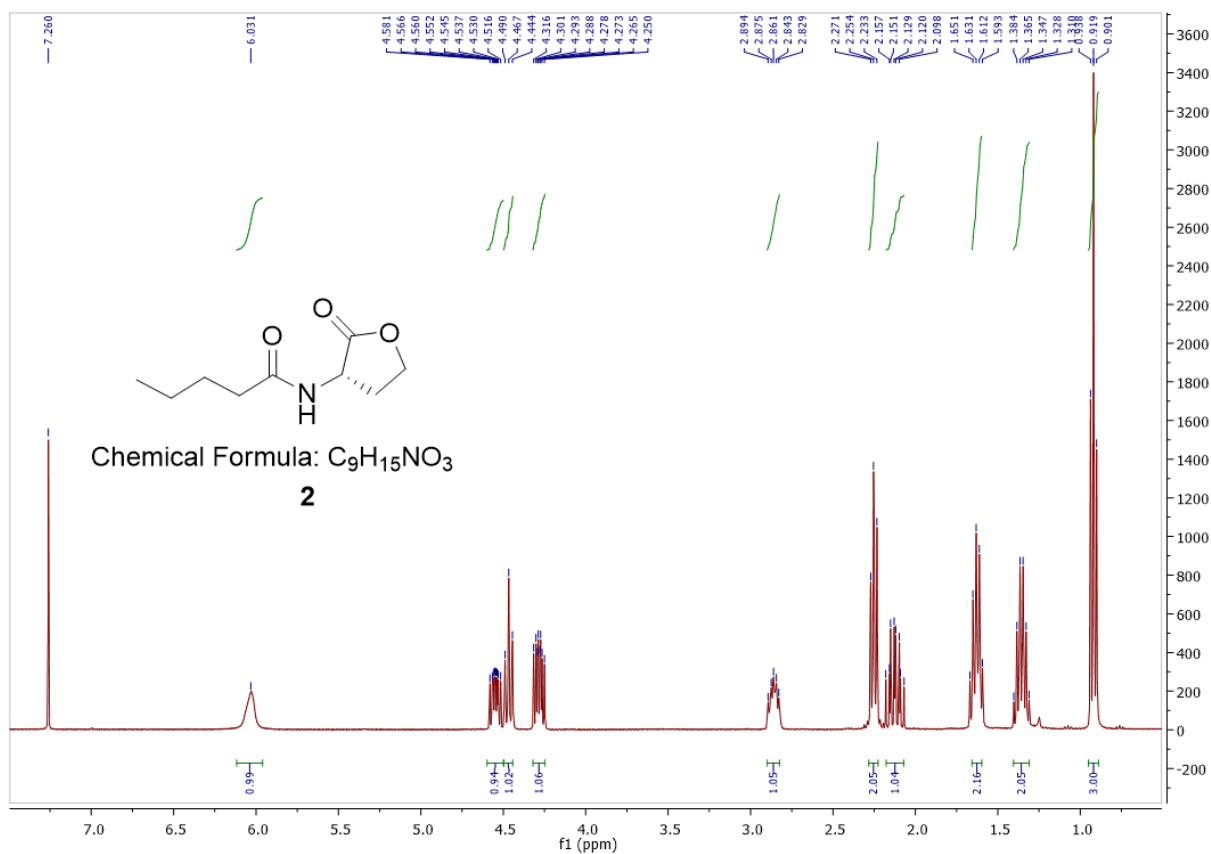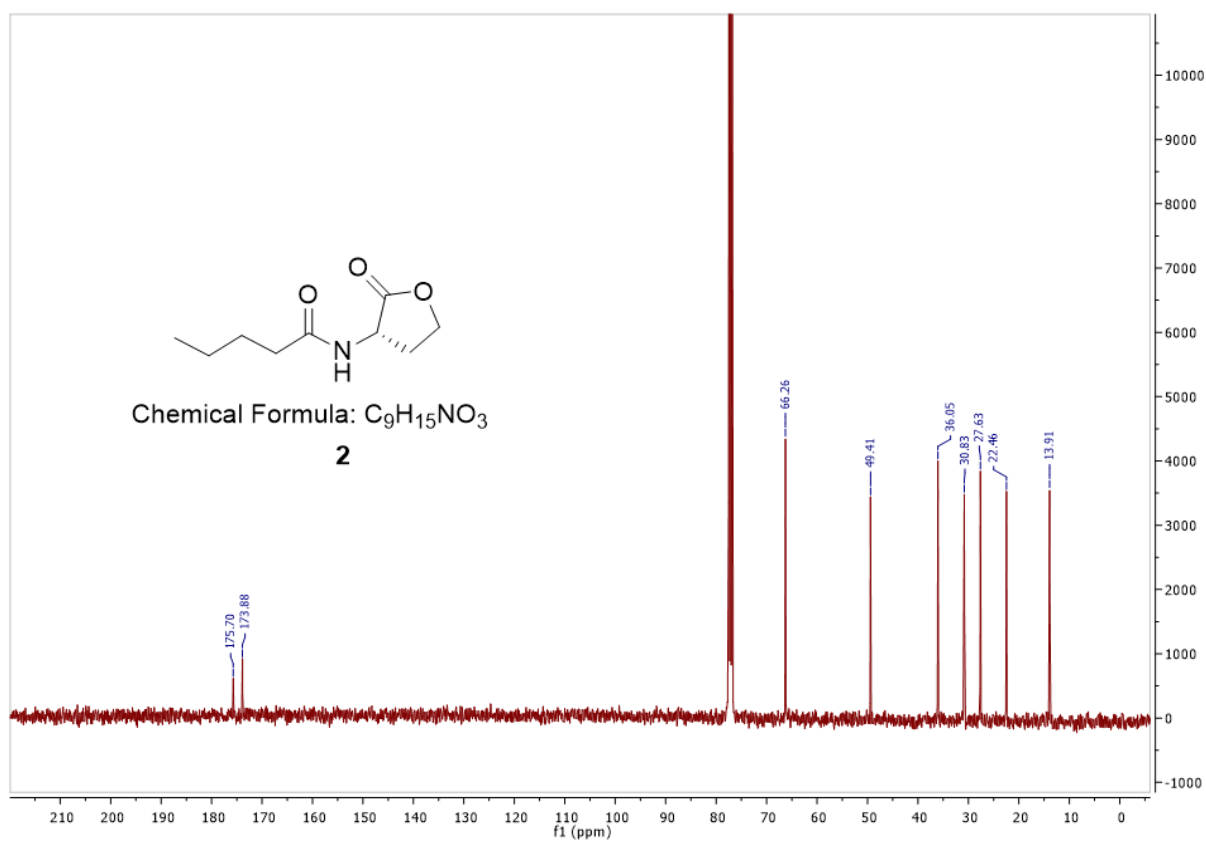

**Figure S3.**  $^1H$  NMR (upper spectrum) and  $^{13}C$  NMR (lower spectrum) of **2**.



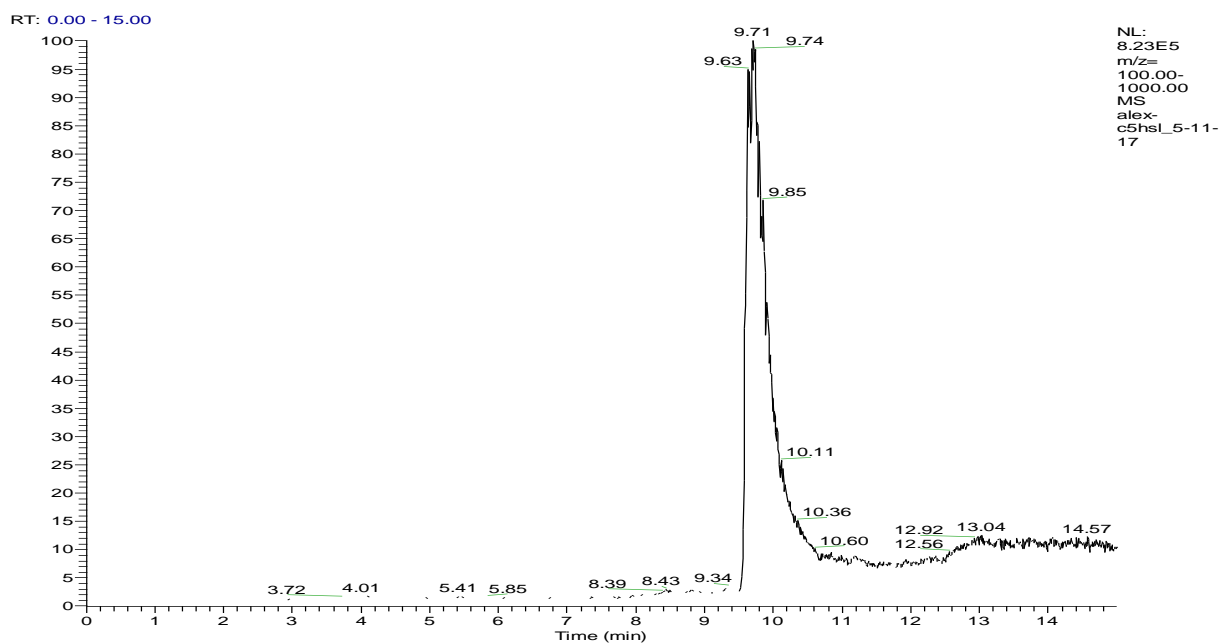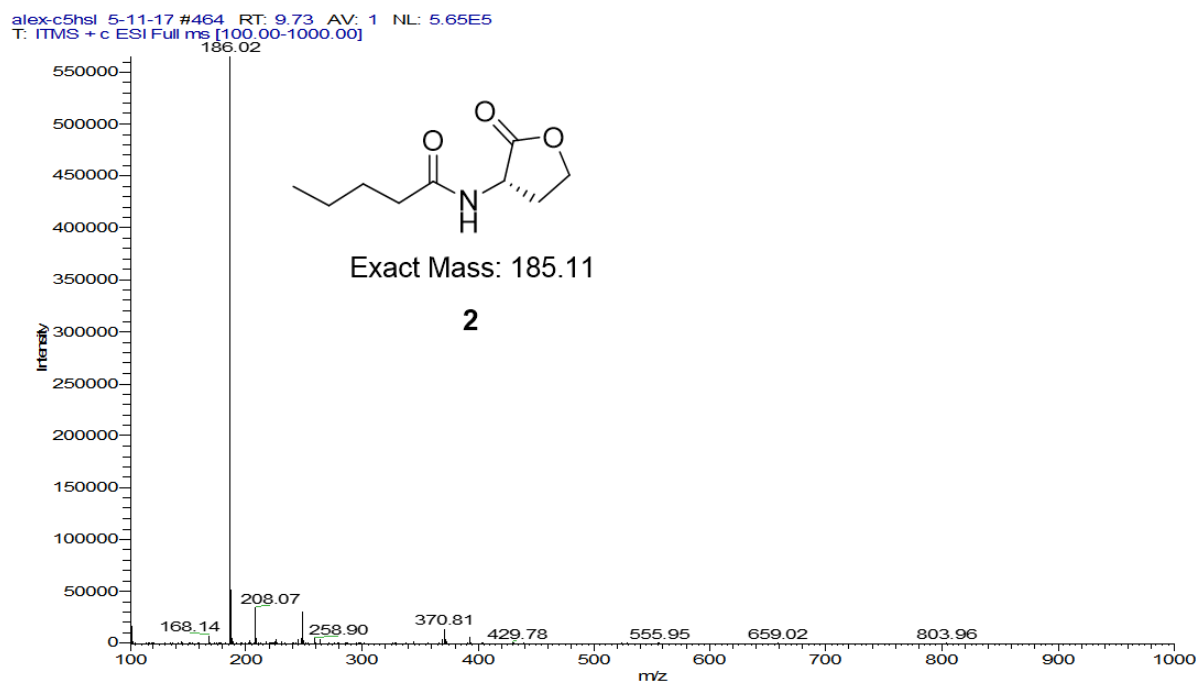

Figure S4. LC-MS of 2.

## Synthesis of 3

To a 20 mL vial with a stirring magnet was added 4-pentynoic acid (**1**), (100 mg, 1.02 mmol) and dissolved in 0.6 mL of DCM. To another 20 mL vial were added EDC·HCl, (215 mg, 1.12 mmol), NHS, (130 mg, 1.12 mmol) and dissolved in 0.78 mL of DCM. The two solutions were combined and left stirred overnight. The solvent was removed by rotary evaporation and purified by column chromatography (EtOAc:Hexane, 50/50 v/v) to yield 2, 5-dioxopyrrolidin-1-yl pent-4-ynoate (**2**), (115.4 mg, 62%) as white solid. To a 20 mL vial with a stirring magnet was added (*S*)-(-)- $\alpha$ -amino- $\gamma$ -butyrolactone hydrobromide (**3a**), (78.8 mg, 0.42 mmol) and dissolved in 1.5 mL of DMF. To another 20 mL vial were added 2, 5-dioxopyrrolidin-1-yl pent-4-ynoate (**2**), (55 mg, 0.28 mmol) and dissolved in 1.5 mL of DMF. The two solutions were combined and TEA, (0.08 mL, 0.56 mmol) was added and left stirred overnight. The solvent was removed by rotary evaporation and purified by column chromatography (EtOAc:DCM, 25/75 v/v) to yield (*S*)-*N*-(2-oxotetrahydrofuran-3-yl) pent-4-ynamide (**3**) as a white solid (40.4 mg, 79%), (**Scheme S3**).

**<sup>1</sup>H NMR** (400 MHz, CDCl<sub>3</sub>):  $\delta$  6.27 (br s, 1H), 4.53-4.59 (ddd,  $J$  = 11.6, 8.8, 6 Hz, 1H), 4.45-4.49 (td,  $J$  = 8.8, 0.8 Hz, 1H), 4.25-4.32 (ddd,  $J$  = 11.6, 9.6, 6 Hz, 1H), 2.83-2.90 (m, 1H), 2.46-2.57 (m, 4H), 2.09-2.20 (dtd,  $J$  = 12.8, 11.6, 9.2 Hz, 1H), 2.01-2.02 (t,  $J$  = 2.8 Hz, 1H).

**<sup>13</sup>C NMR** (101 MHz, CDCl<sub>3</sub>):  $\delta$  175.43, 171.70, 82.63, 69.80, 66.28, 49.54, 34.95, 30.73, 14.78.

**LC-MS**  $m/z$  calculated for C<sub>9</sub>H<sub>11</sub>NO<sub>3</sub> (M+H): 182.07. Found: 182.04.

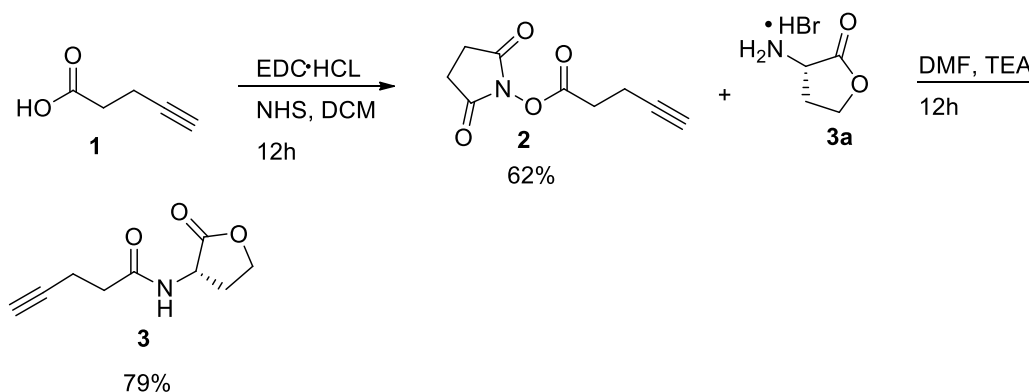

**Scheme S3.** Synthesis of **3**.

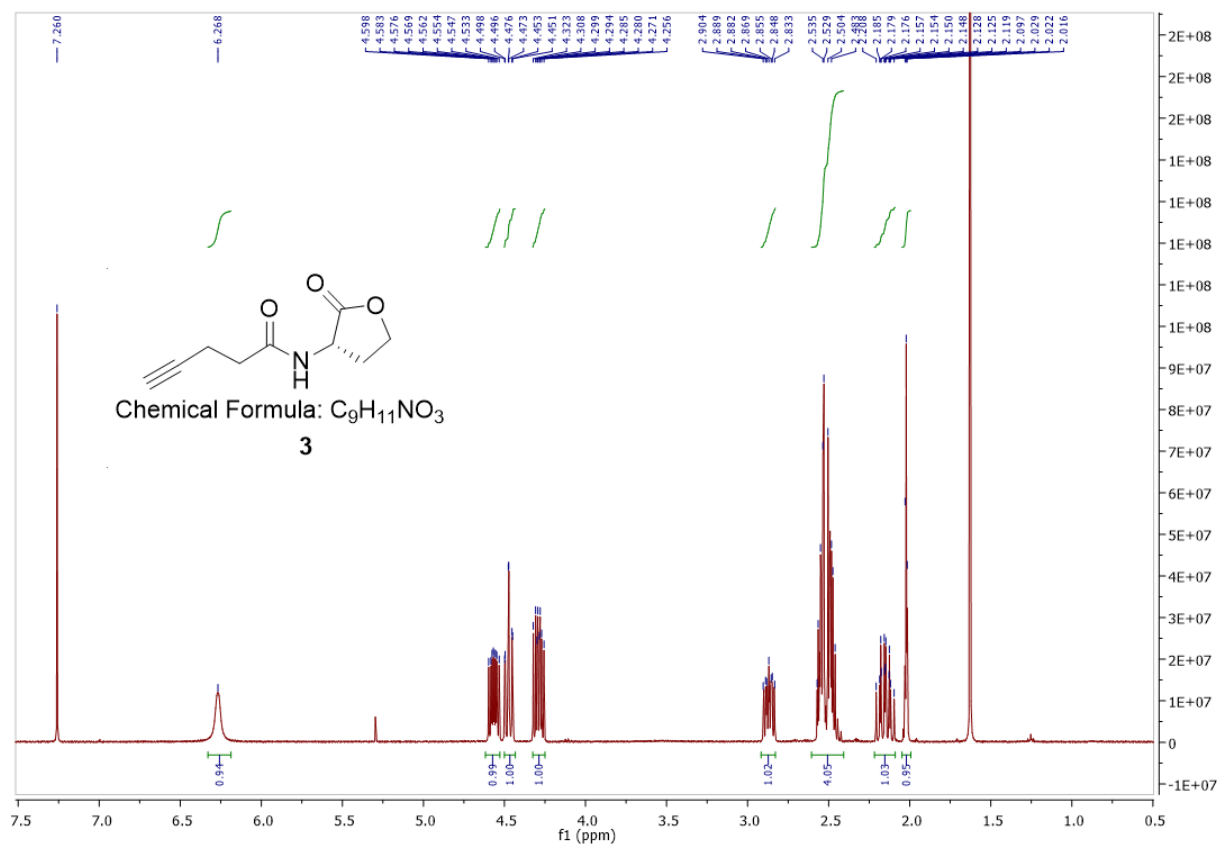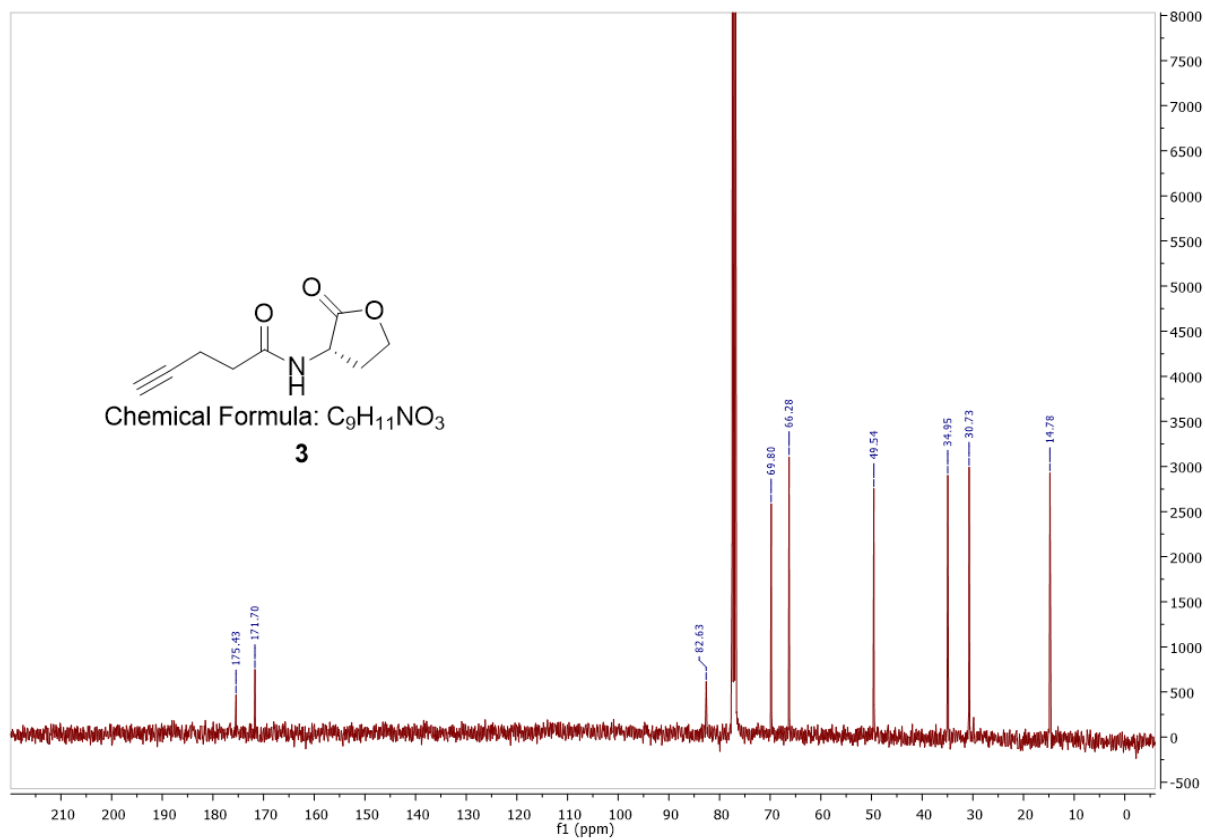

**Figure S5.** <sup>1</sup>H NMR (upper spectrum) and <sup>13</sup>C NMR (lower spectrum) of **3**.

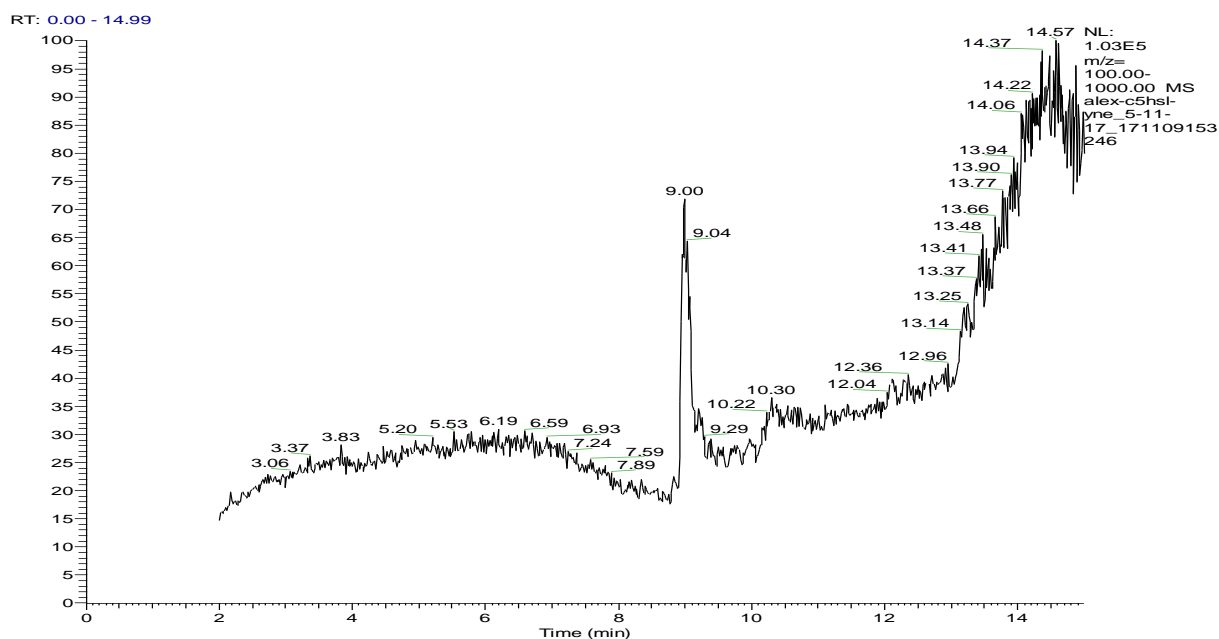

alex-c5hsl-yne\_5-11-17\_171109153246 #444 RT: 9.00 AV: 1 NL: 4.24E4  
T: [TMS + c ESI Full ms [100.00-1000.00]]

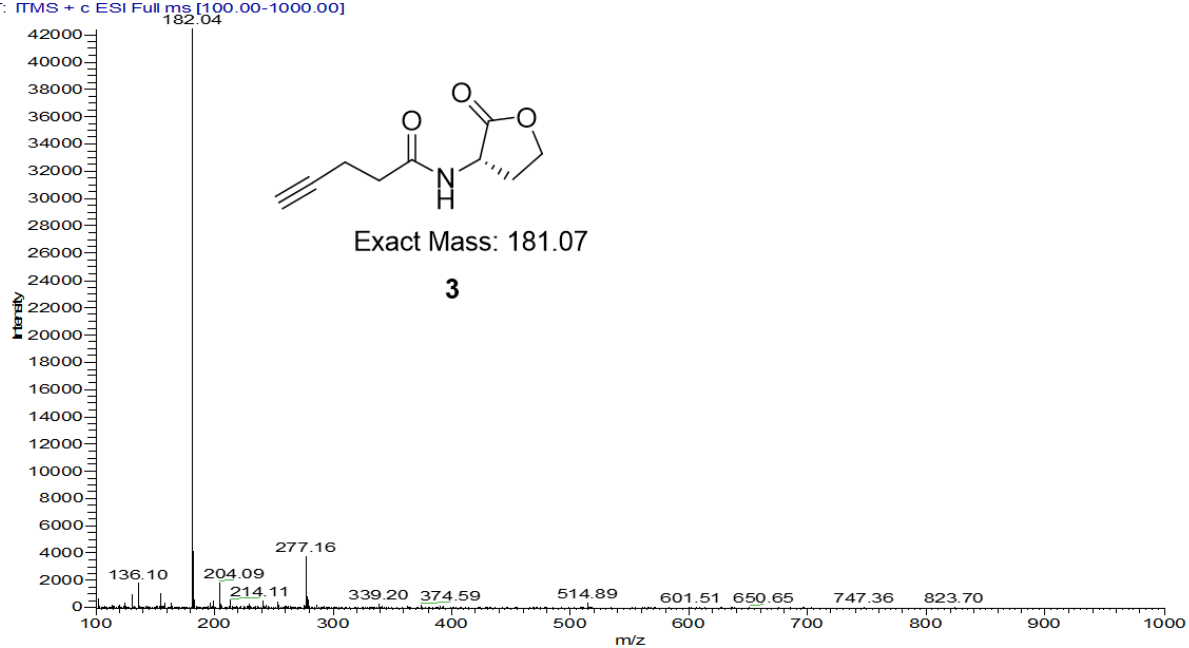

Figure S6. LC-MS of 3.

## Synthesis of 4

To a microwave reaction tube were added cyclopentene oxide (**1**), (1 gr, 11.8 mmol) and aqueous  $\text{NH}_4\text{OH}$ , (25%, 15.74 mL). The tube was sealed and irradiated under microwave at  $85^\circ\text{C}$  for 1 h. The reaction was cooled to room temperature. The solvent was removed by rotary evaporation to yield 2-amino-cyclopentanol (**2**), (902.65 mg, 76%) as a white liquid. To a 20 mL vial with a stirring magnet was added 2-amino-cyclopentanol (**2**), (225 mg, 2.23 mmol) and dissolved in 1.25 mL of DMF. To another 20 mL vial was added 2, 5-dioxopyrrolidin-1-yl pent-4-ynoate (**3**), (289.9 mg, 1.48 mmol), and dissolved in 1.25 mL of DMF. The two solutions were combined, stirred for 10 min, and TEA, (0.42 mL, 2.96 mmol), was added and left stirred overnight. The solvent was removed by rotary evaporation to yield brown liquid which was purified by column chromatography (EtOAc:Hexane, 75/25 v/v) to yield *N*-(2-hydroxycyclopentyl) pent-4-ynamide (**4a**), (244.86 mg, 91%) as a white solid. To a 20 mL vial with a stirring magnet was added *N*-(2-hydroxycyclopentyl) pent-4-ynamide (**4a**), (244.86 mg, 1.35 mmol) and dissolved in 1 mL of THF. 1.5 mL of Jones reagent ( $\text{CrO}_3/\text{H}_2\text{SO}_4$ ) was added drop-wise and the mixture was stirred for 2 h. The reaction was quenched with 1 mL of isopropanol. Water and EtOAc were added to extract the product. The solvent was removed by rotary evaporation and purified by column chromatography (EtOAc:DCM, 50/50 v/v) to yield *N*-(2-oxocyclopentyl) pent-4-ynamide (**4**) as a white solid (61.7 mg, 26%), (**Scheme S4**).

$^1\text{H NMR}$  (400 MHz,  $\text{CDCl}_3$ ):  $\delta$  6.11 (br s, 1H), 4.09-4.16 (m, 1H), 2.62-2.68 (br m, 1H), 2.37-2.54 (m, 5H), 2.13-2.23 (m, 1H), 2.02-2.10 (br m, 1H), 2.00 (t,  $J = 2.4$  Hz, 1H), 1.79-1.92 (m, 1H), 1.53-1.64 (qd,  $J = 12.4, 6.8$  Hz, 1H).

$^{13}\text{C NMR}$  (101 MHz,  $\text{CDCl}_3$ ):  $\delta$  215.24, 171.40, 82.85, 69.51, 58.33, 35.03, 34.99, 30.19.

LC-MS  $m/z$  calculated for  $\text{C}_{10}\text{H}_{13}\text{NO}_2$  ( $\text{M}+\text{H}$ ): 180.09. Found: 180.06.

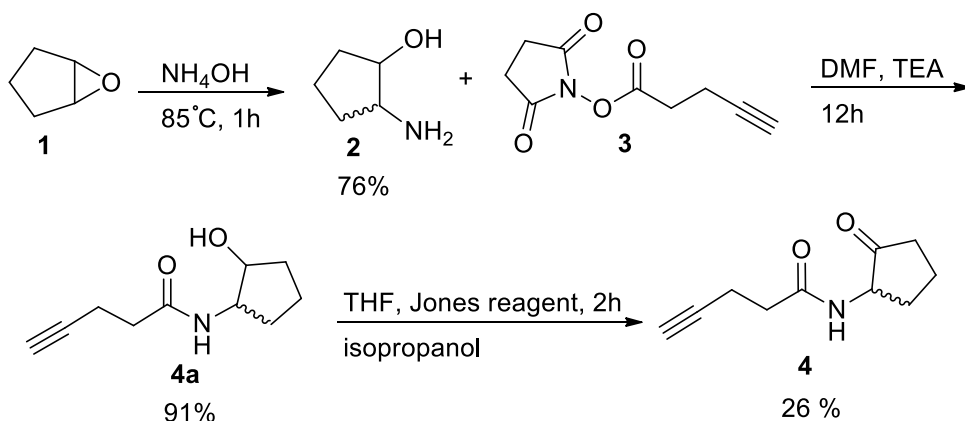

**Scheme S4.** Synthesis of **4**.

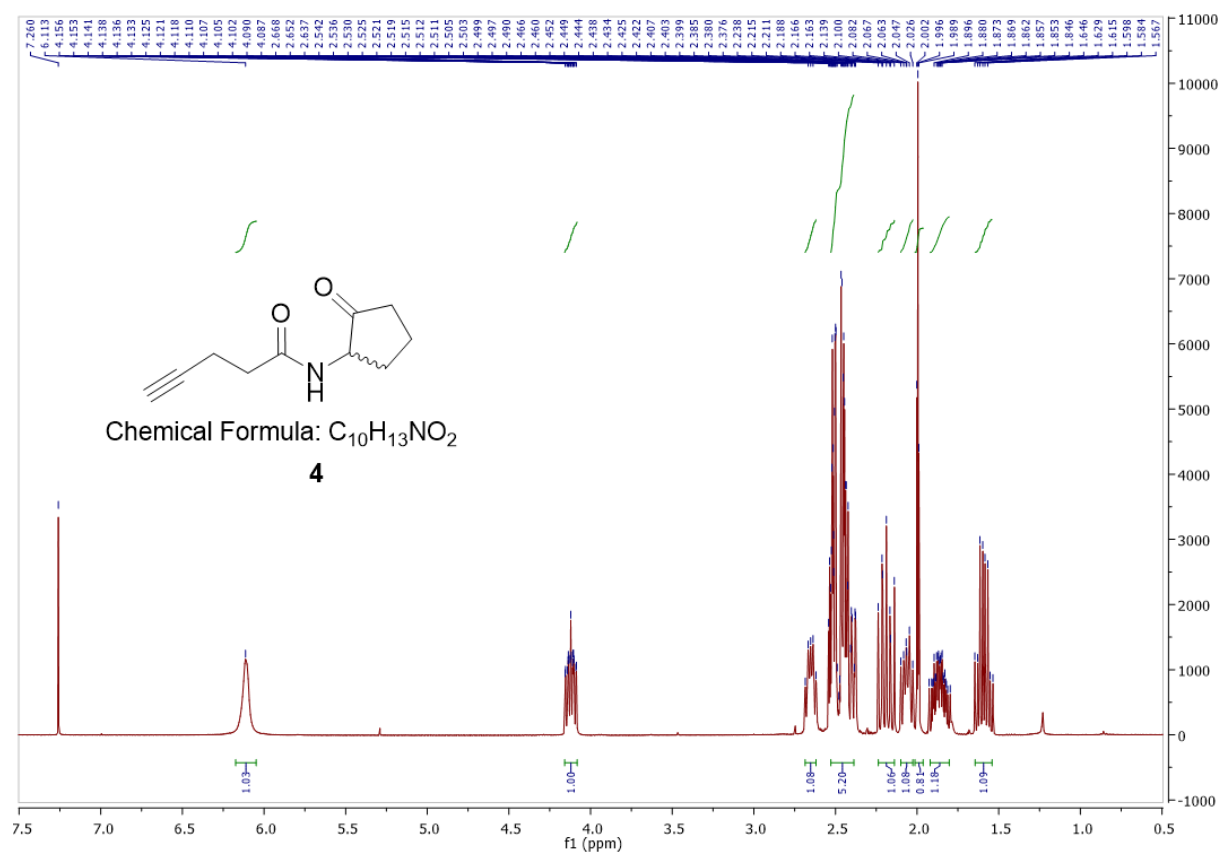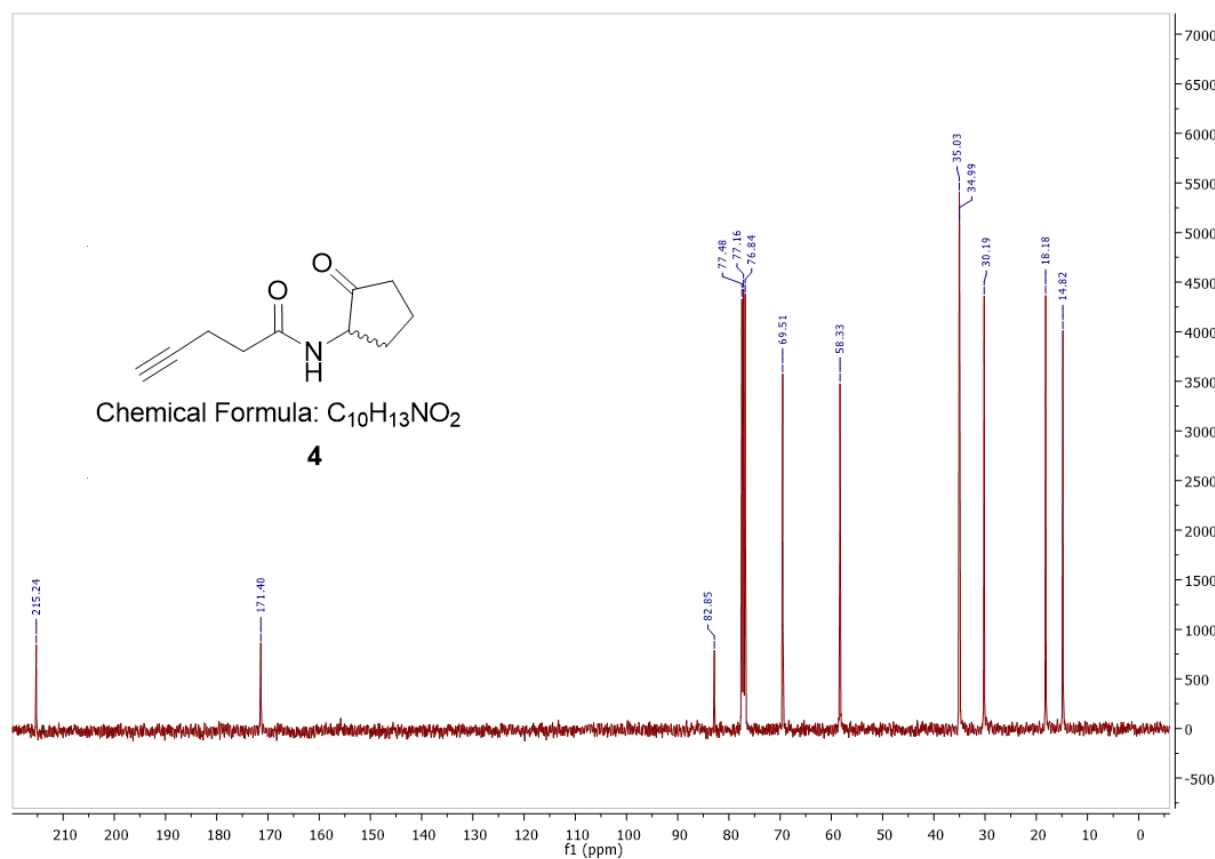

Figure S7. <sup>1</sup>H NMR (upper spectrum) and <sup>13</sup>C NMR (lower spectrum) of **4**.

RT: 0.00 - 15.00

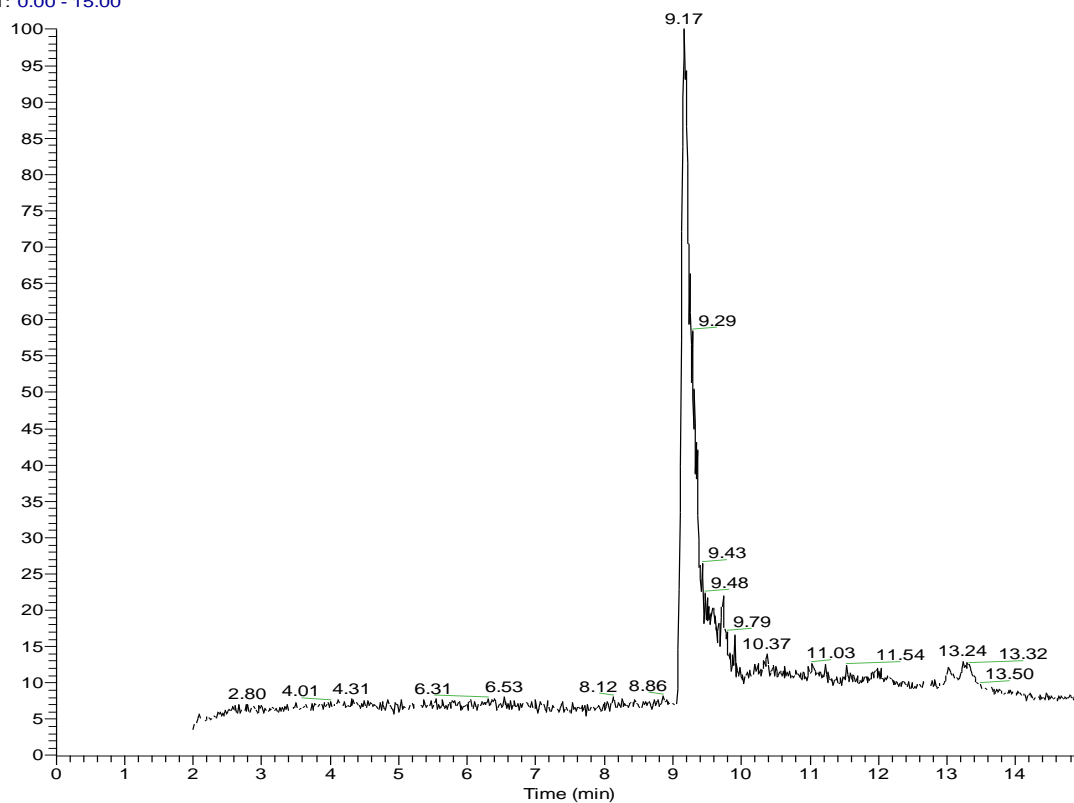

NL:  
3.13E5  
m/z=  
100.00-  
1000.00  
MS  
alex-  
c5y5ron\_11  
-12-17

alex-c5y5ron 11-12-17 #449 RT: 9.17 AV: 1 NL: 2.63E5  
T: ITMS + c ESI Full ms [100.00-1000.00]

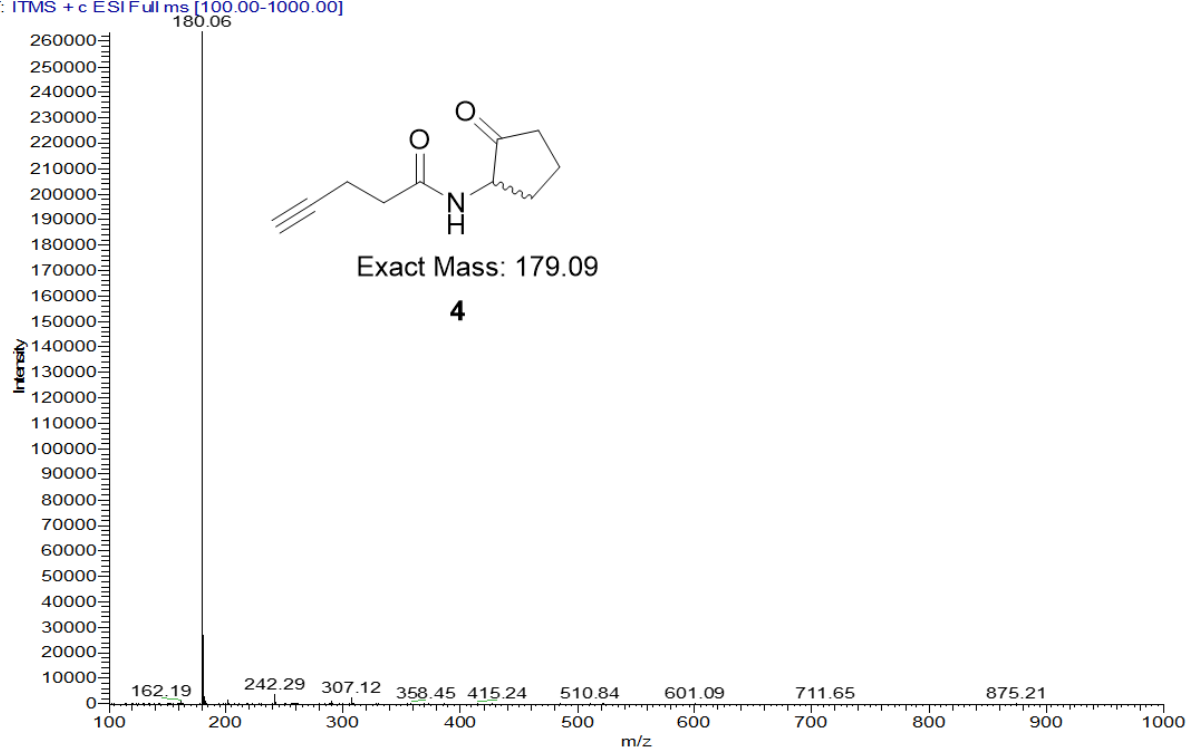

Figure S8. LC-MS of 4.

## Synthesis of 5

To a microwave reaction tube were added cyclohexene oxide (**1**), (0.5 gr, 5 mmol) and aqueous  $\text{NH}_4\text{OH}$ , (25%, 7 mL). The tube was sealed and irradiated under microwave at  $85^\circ\text{C}$  for 1 h. The reaction was cooled to room temperature. The solvent was removed by rotary evaporation to yield 2-amino-cyclohexanol (**2**), (0.49 gr, 86%) as white solid. To a 20 mL vial with a stirring magnet was added 2-amino-cyclohexanol (**2**), (180 mg, 1.56 mmol) and dissolved in 1.1 mL of DMF. To another 20 mL vial was added 2, 5-dioxopyrrolidin-1-yl pent-4-ynoate (**3**), (254.48 mg, 1.3 mmol), and dissolved in 1.1 mL of DMF. The two solutions were combined, stirred for 10 min and TEA, (0.36 mL, 2.6 mmol), was added and left stirred overnight. The solvent was removed by rotary evaporation and the crude was purified by column chromatography (EtOAc:Hexane, 50/50 v/v) to yield *N*-(2-hydroxycyclohexyl) pent-4-ynamide (**4**), as a white solid. To a 20 mL vial with a stirring magnet was added *N*-(2-hydroxycyclohexyl) pent-4-ynamide (**4**), (320.54 mg, 1.64 mmol) and dissolved in 1 mL of THF. 1.5 mL of Jones reagent ( $\text{CrO}_3/\text{H}_2\text{SO}_4$ ) was added drop-wise and the mixture was stirred for 2 h. The reaction was quenched with 1 mL of isopropanol. Water and EtOAc were added to extract the product. The solvent was removed by rotary evaporation and the crude was purified by column chromatography (EtOAc:Hexane, 50/50 v/v) to yield *N*-(2-oxocyclohexyl) pent-4-ynamide (**5**), as a white solid (136.9 mg, 43%), (**Scheme S5**).

$^1\text{H NMR}$  (400 MHz,  $\text{CDCl}_3$ ):  $\delta$  6.57 (br s, 1H), 4.45-4.51 (m, 1H), 2.64-2.70 (m, 1H), 2.35-2.54 (m, 6H), 2.10-2.18 (m, 1H), 1.98-1.99 (td,  $J = 2.8, 0.8$  Hz, 1H), 1.83-1.90 (br m 1H), 1.73-1.82 (br m, 1H), 1.57-1.69 (br m, 1H), 1.29-1.39 (qd,  $J = 12.4, 4.0$  Hz, 1H).

$^{13}\text{C NMR}$  (101 MHz,  $\text{CDCl}_3$ ):  $\delta$  207.85, 170.61, 82.89, 69.44, 58.34, 41.26, 35.64, 35.37, 28.20, 24.13, 14.94.

LC-MS  $m/z$  calculated for  $\text{C}_{11}\text{H}_{15}\text{NO}_2$  ( $\text{M}+\text{H}$ ): 194.11. Found: 194.02.

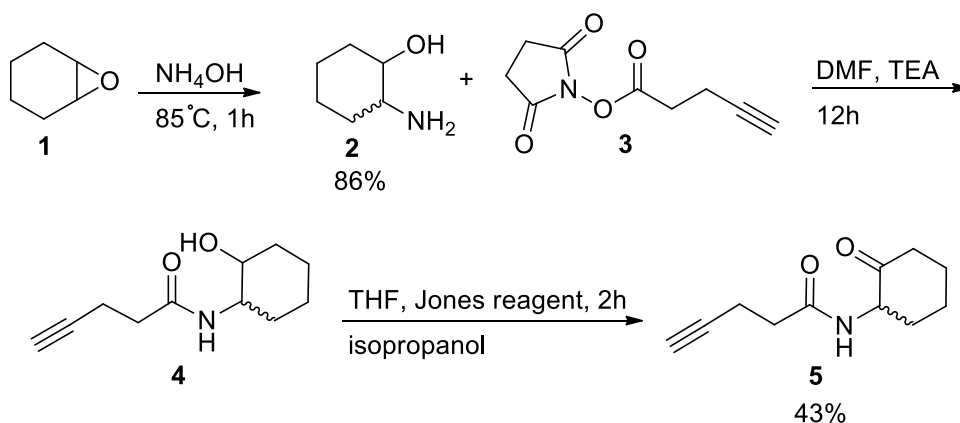

**Scheme S5.** Synthesis of **5**.



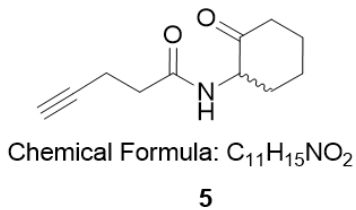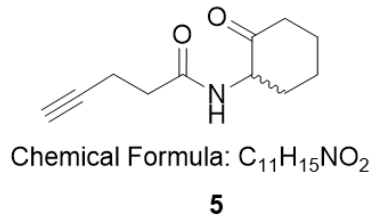

**Figure S9.**  $^1\text{H}$  NMR (upper spectrum) and  $^{13}\text{C}$  NMR (lower spectrum) of **5**.

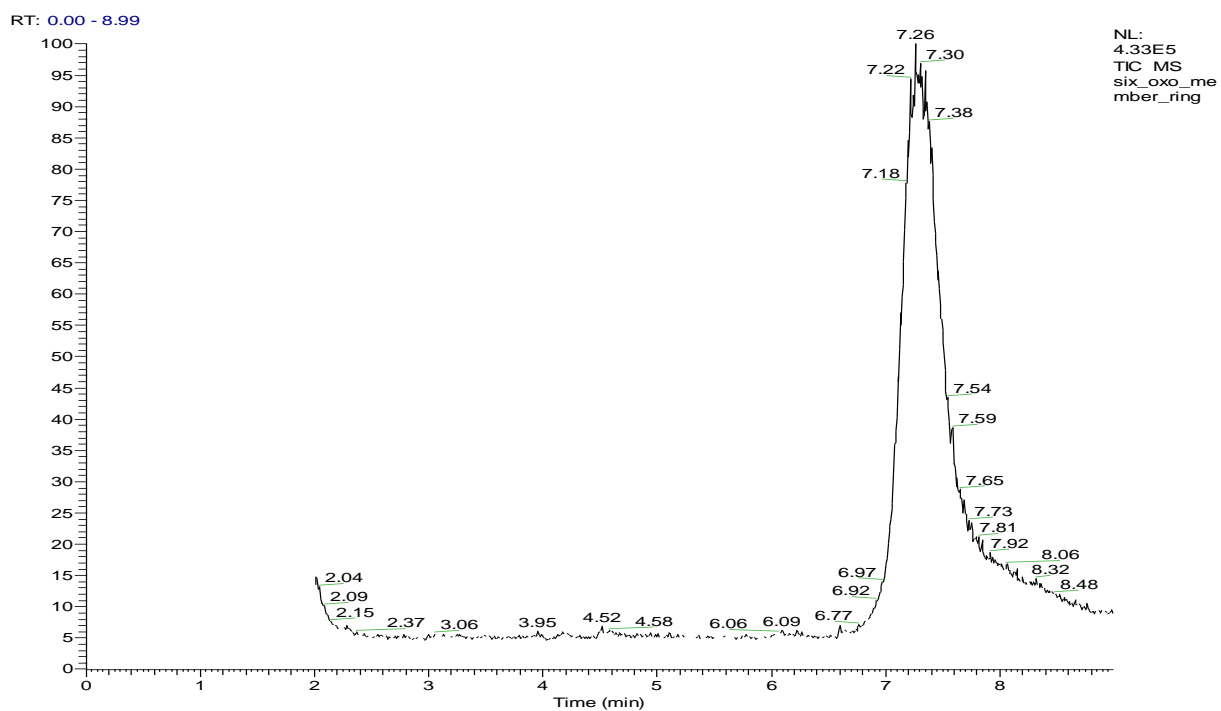

six\_oxo\_member\_ring#494 RT: 7.28 AV: 1 NL: 3.14E5  
T: ITMS + c ESI Full ms [150.00-900.00]

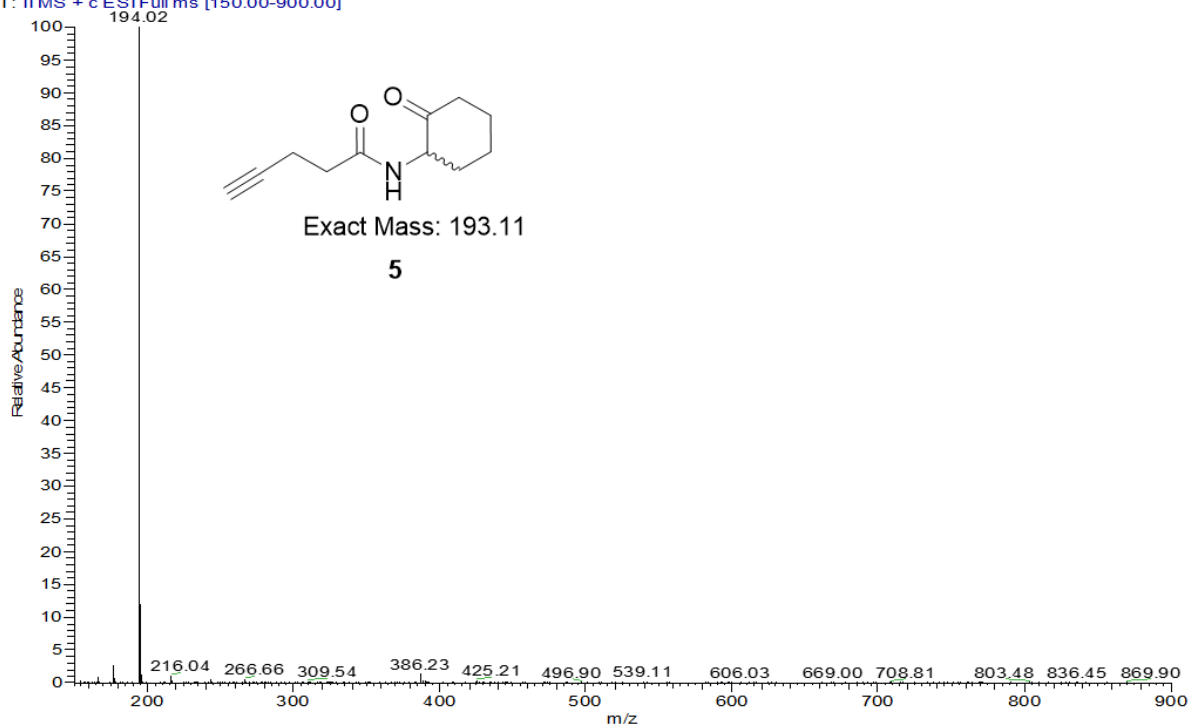

Figure S10. LC-MS of 5.

## Synthesis of 6

To a 4 mL vial was added *N*-(2-hydroxycyclopentyl)-3-(3-methyl-3*H*-diazirin-3-yl) propanamide (**1**), (35 mg, 0.166 mmol) and dissolved in 0.4 mL of DCM. Dess-Martin periodinane, (84.3 mg, 0.198 mmol) was added to the vial and the mixture was stirred with a magnet and left overnight. To a 100 mL flask was added 25 mL water and the reaction mixture, 50 mL of 10% NaHCO<sub>3</sub> and equal amount of DCM. The two phases were separated and the organic phase was dried over MgSO<sub>4</sub>. The solvent was removed by rotary evaporation and purified by column chromatography (EtOAc:Hexane, 60/40 v/v) to yield 3-(3-methyl-3*H*-diazirin-3-yl)-*N*-(2-oxocyclopentyl) propanamide (**6**), as a white solid (22.5 mg, 64%), (**Scheme S6**).

**<sup>1</sup>H NMR** (400 MHz, CDCl<sub>3</sub>): δ 5.86 (br s, 1H), 4.07-4.13 (m, 1H), 2.62-2.69 (br m, 1H), 2.38-2.45 (dd, *J* = 18.5, 9.1 Hz, 1H), 2.14-2.24 (m, 1H), 1.99-2.24 (m, 2H), 1.83-1.93 (m, 1H), 1.73-1.76 (t, *J* = 7.6 Hz, 2H), 1.53-1.64 (qd, *J* = 12.4, 6.8, Hz, 2H), 1.03 (s, 3H).

**<sup>13</sup>C NMR** (101 MHz, CDCl<sub>3</sub>): δ 215.20, 171.79, 58.36, 34.98, 30.43, 30.18, 30.06, 25.50, 20.00, 18.18.

**LC-MS** *m/z* calculated for C<sub>10</sub>H<sub>15</sub>N<sub>3</sub>O<sub>2</sub> (M+H): 210.12. Found: 209.98.

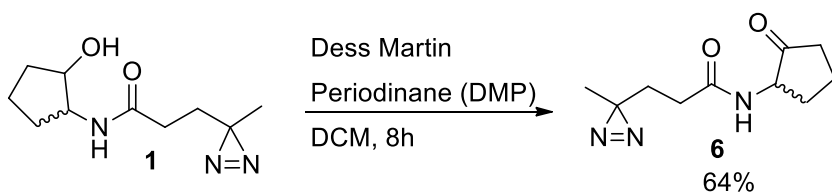

**Scheme S6.** Synthesis of **6**.

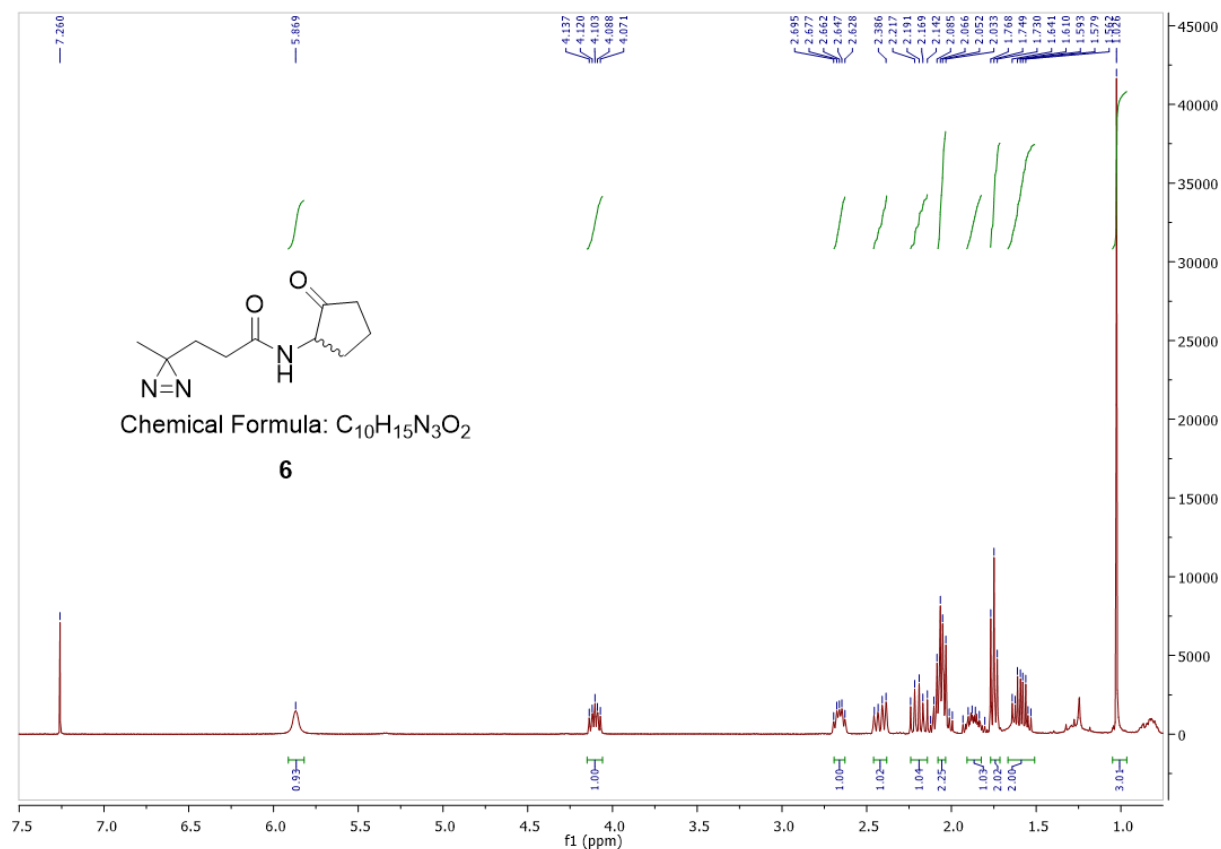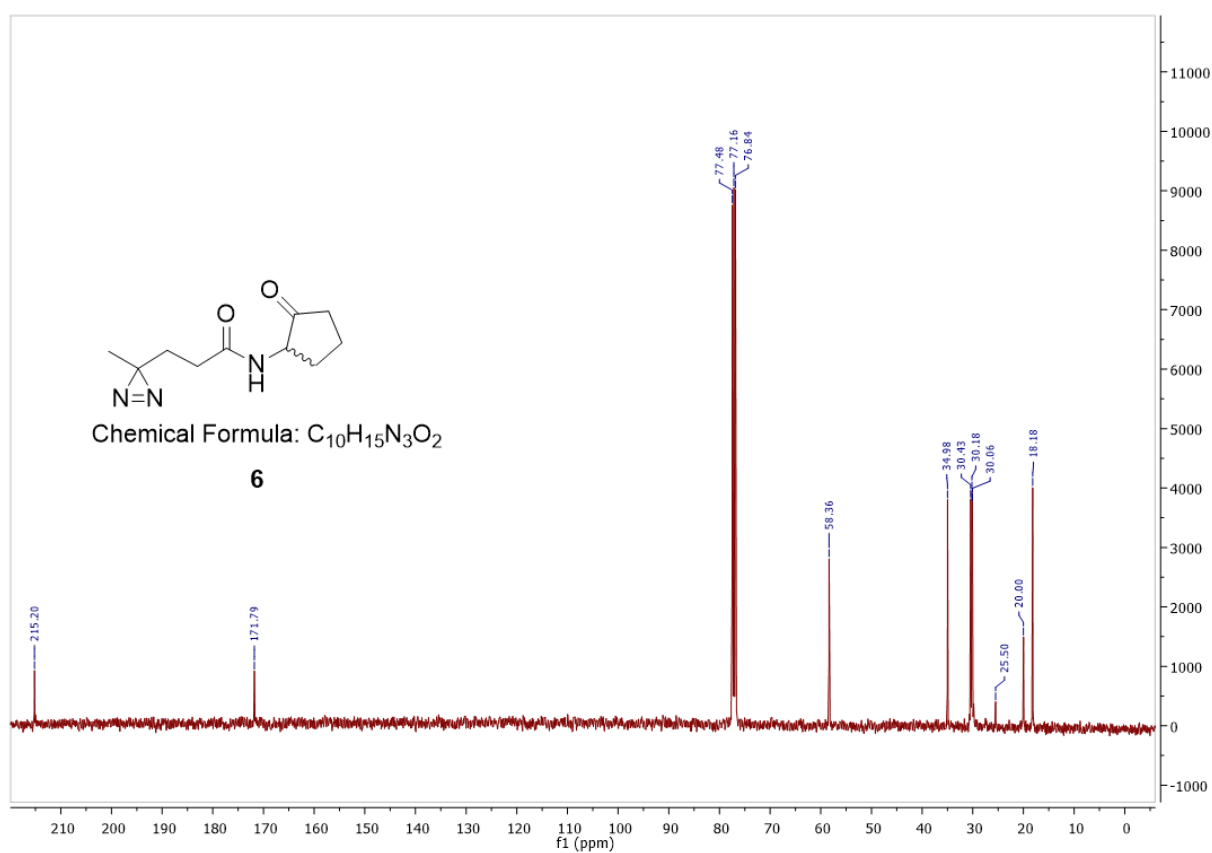

**Figure S11.**  $^1H$  NMR (upper spectrum) and  $^{13}C$  NMR (lower spectrum) of **6**.

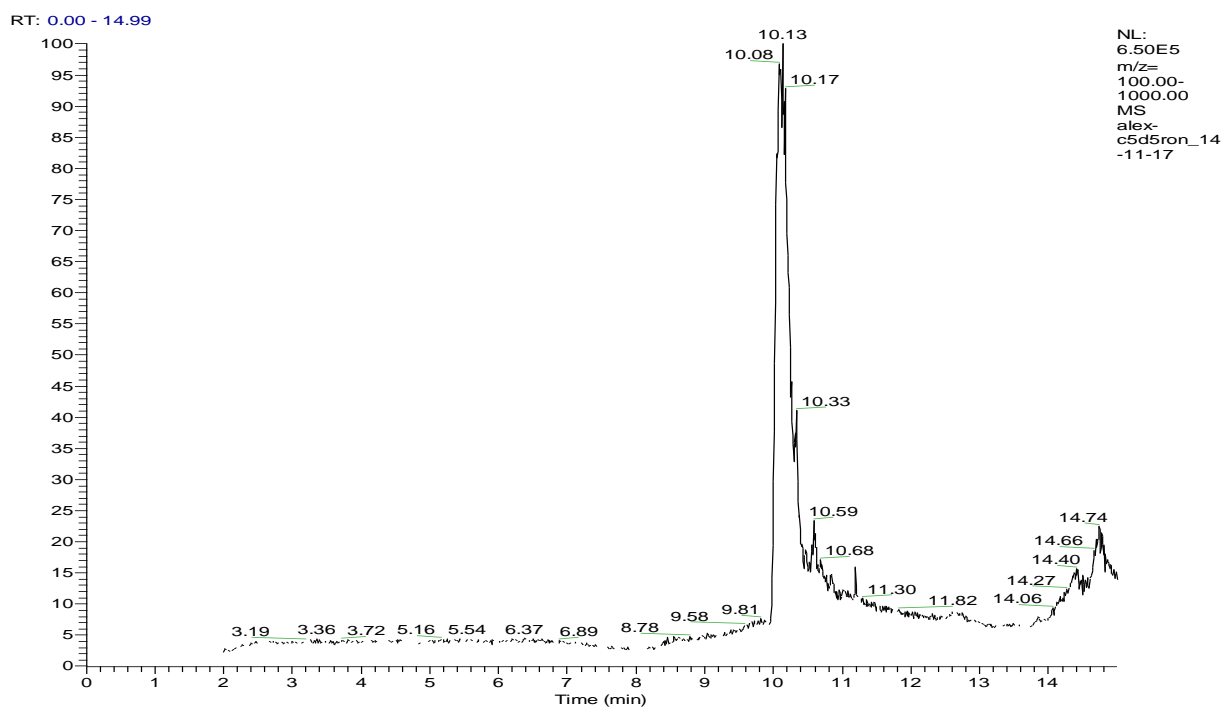

alex-c5d5ron 14-11-17 #556 RT: 10.11 AV: 1 NL: 4.20E5  
 T: ITMS + c ESI Full ms [100.00-1000.00]

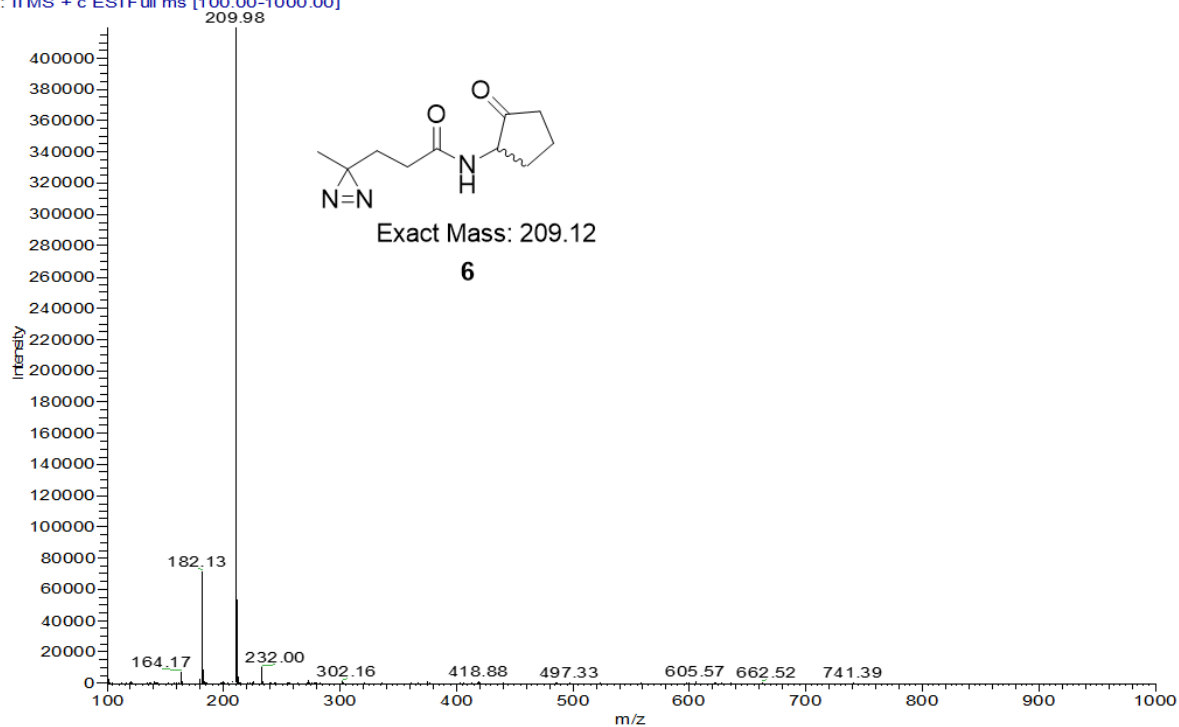

Figure S12. LC-MS of **6**.

## Synthesis of 7

To a 4 mL vial was added *N*-(2-hydroxycyclohexyl)-3-(3-methyl-3*H*-diazirin-3-yl) propanamide (**1**), (59.6 mg, 0.265 mmol) and dissolved in 0.53 mL of DCM. Dess-martin periodinane, (135 mg, 0.318 mmol) was added to the vial and the mixture was stirred with a magnet and left overnight. To a 100 mL flask was added 25 mL water and the reaction mixture, 50 mL of 10% NaHCO<sub>3</sub> and equal amount of DCM. The two phases were separated and the organic phase was dried over MgSO<sub>4</sub>. The solvent was removed by rotary evaporation and purified by column chromatography (EtOAc:Hexane, 60/40 v/v) to yield 3-(3-methyl-3*H*-diazirin-3-yl)-*N*-(2-oxocyclohexyl) propanamide (**7**) as a white solid (31.8 mg, 54%), (**Scheme S7**).

<sup>1</sup>H NMR (400 MHz, CDCl<sub>3</sub>): δ 6.42 (br s, 1H), 4.42-4.48 (m, 1H), 2.63-2.70 (m, 1H), 2.50-2.55 (m, 1H), 2.34-2.43 (m, 1H), 2.10-2.18 (m, 1H), 1.99-2.08 (m, 2H), 1.84-1.90 (m, 1H), 1.76-1.81 (m, 1H), 1.68-1.75 (m, 2H), 1.57-1.67 (m, 1H), 1.28-1.39 (qd, *J* = 12.4, 4.0 Hz, 1H), 1.02 (s, 3H).

<sup>13</sup>C NMR (101 MHz, CDCl<sub>3</sub>): δ 207.88, 171.00, 58.27, 41.25, 35.59, 30.72, 30.14, 28.19, 25.50, 24.13, 19.98.

LC-MS *m/z* calculated for C<sub>11</sub>H<sub>17</sub>N<sub>3</sub>O<sub>2</sub> (M+H): 224.13. Found: 223.95.

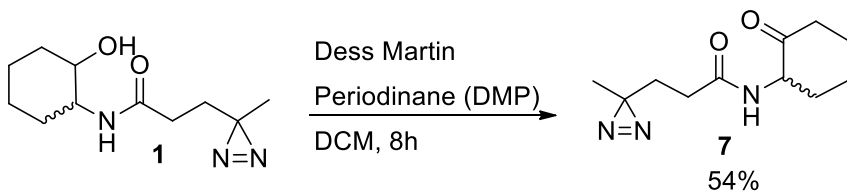

**Scheme S7.** Synthesis of **7**.

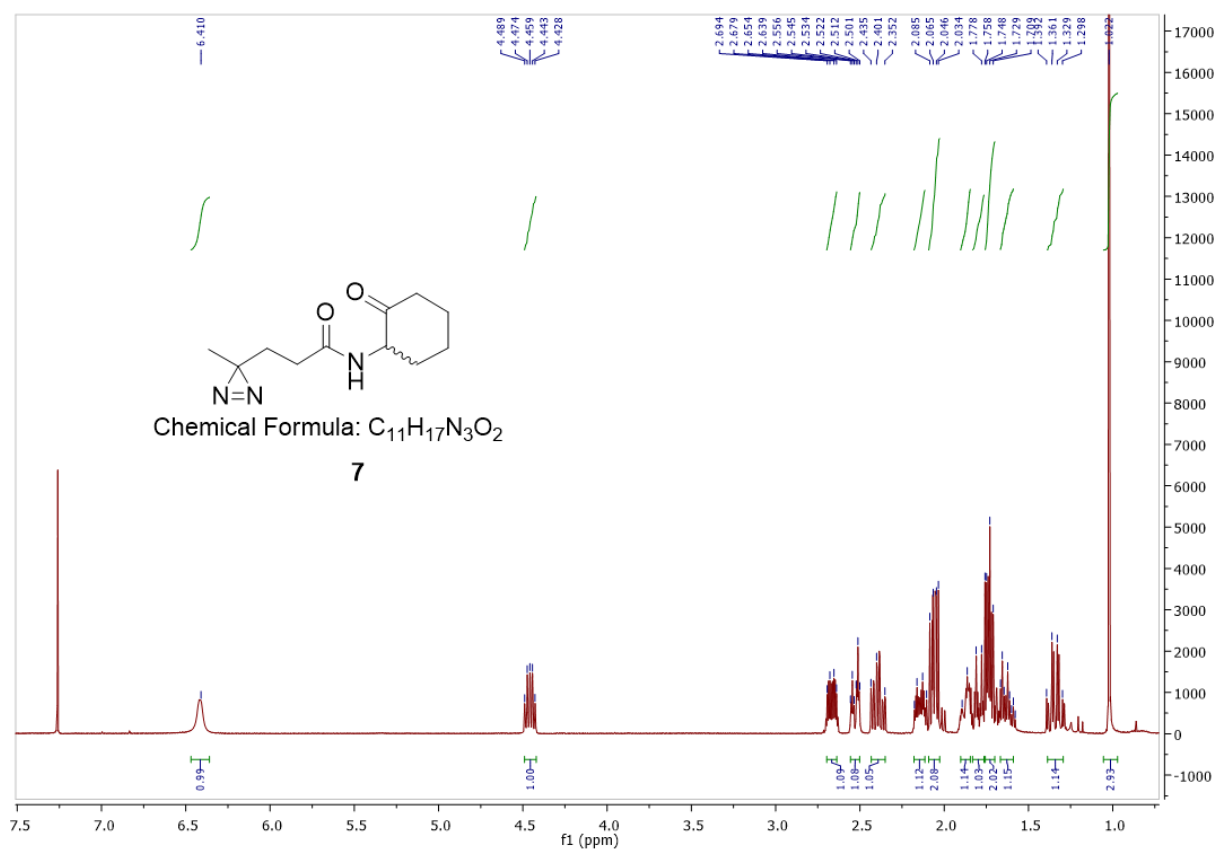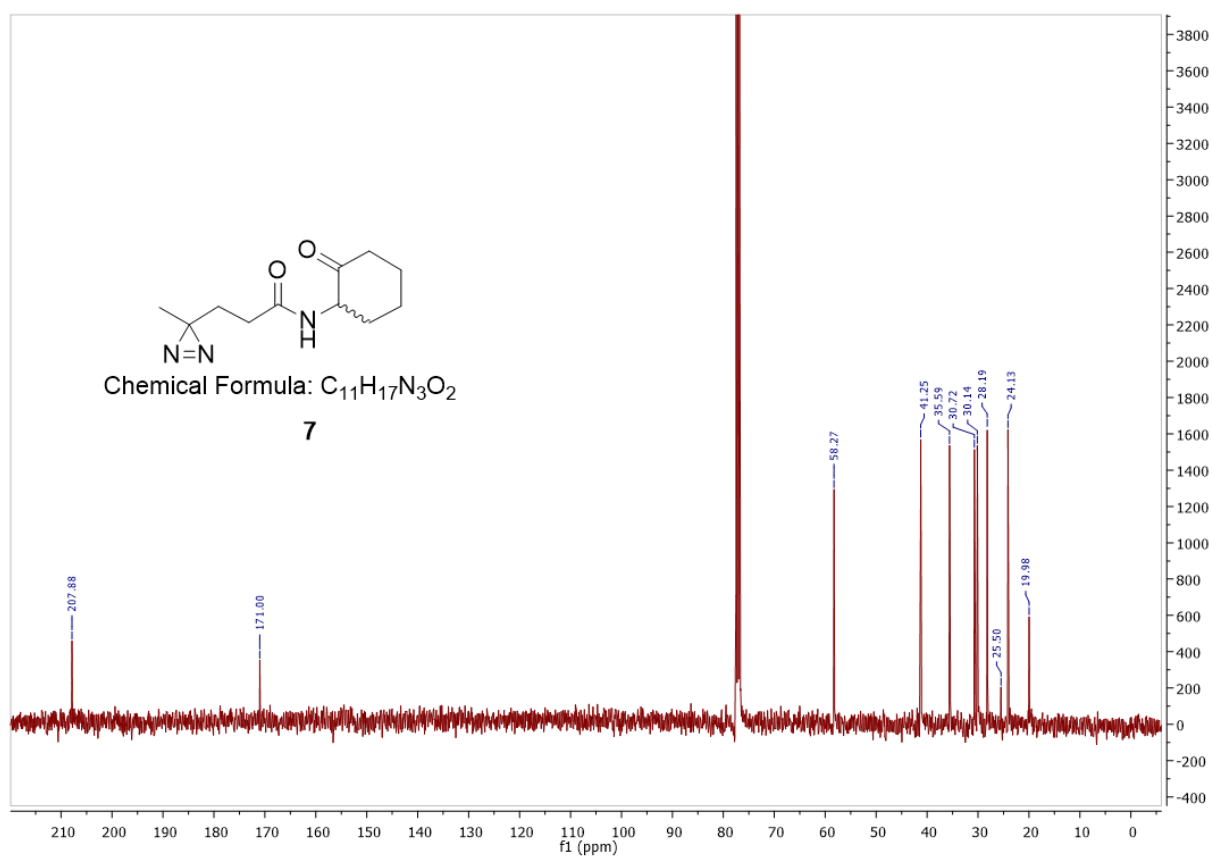

Figure S13.  $^1H$  NMR (upper spectrum) and  $^{13}C$  NMR (lower spectrum) of **7**.

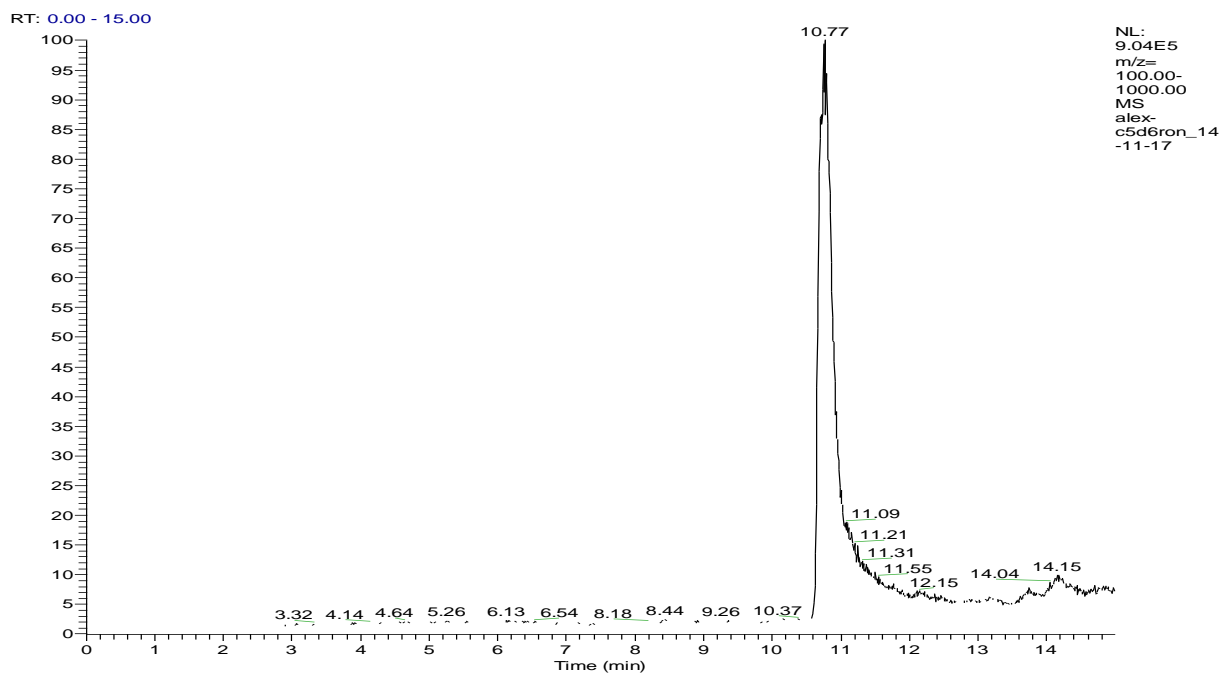

alex-c5d6ron\_14-11-17 #546 RT: 10.77 AV: 1 NL: 4.59E5  
T: ITMS + c ESI Full ms [100.00-1000.00]

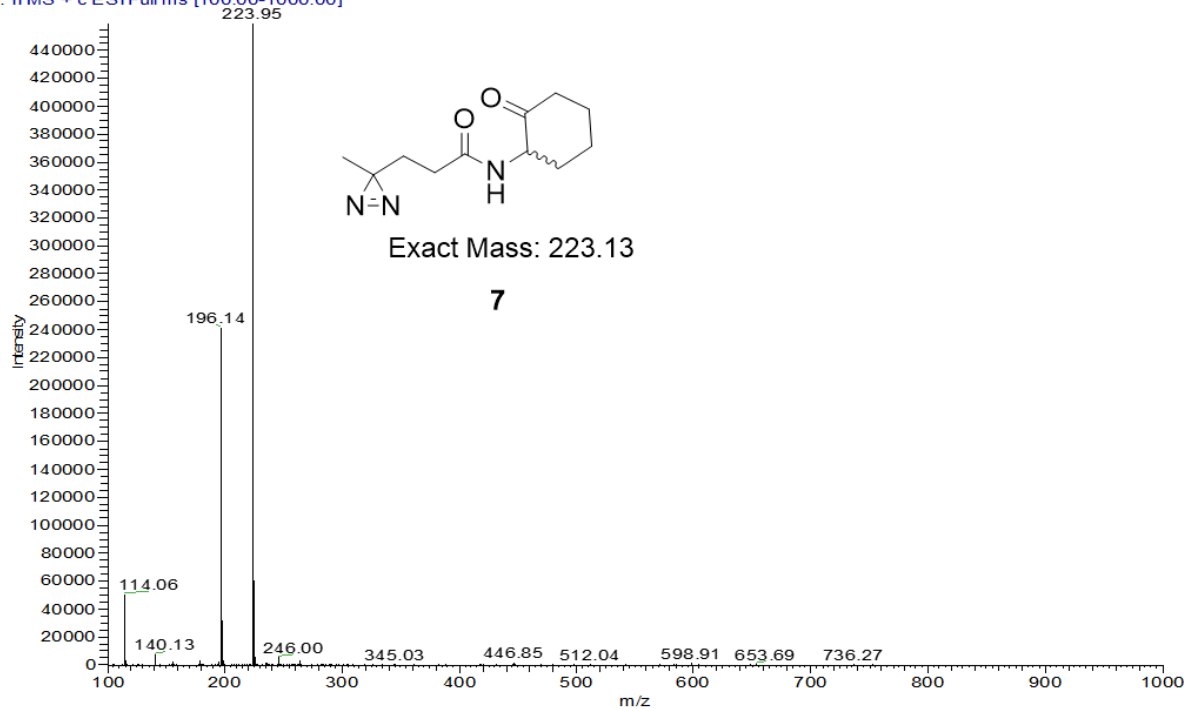

Figure S14. LC-MS of **7**.



## Synthesis of 8

To a 50 mL round bottom flask with a stirring magnet, septum and N<sub>2</sub> atmosphere was added levulinic acid (**1**), (476 mg, 4.1 mmol). To the flask was added 8 N methanolic ammonia (4.6 mL) and the mixture was allowed to be stirred for 3 h at 0°C. A balloon was used to maintain the ammonia environment and allowing the release of pressure. Hydroxylamine-O-sulfonic acid 97%, (625 mg, 5.52 mmol) was dissolved in 4 mL of MeOH and added to the reaction mixture dropwise. The mixture was allowed to be stirred overnight. The ammonia was removed by blowing air through the flask. The solvent was concentrated by rotary evaporation to give a yellowish liquid. The reaction flask was covered with aluminum foil to minimize exposure to light and 25 mL of MeOH was added to re-dissolve the diaziridine acid. The reaction flask was placed in an ice-water bath and the mixture was allowed to stir for 5 min with a rubber septum cap. TEA, (0.9 mL, 4.1 mmol) was added drop-wise and the mixture was allowed to stir for 5 min. Using a spatula, 642 mg of iodine chips were added slowly to the stirring reaction mixture until the solution stayed persistently red-brown for more than 5 min. The reaction mixture was mixed with 25 mL of EtOAc and transferred to a separatory funnel, washed with 100 mL of 1 M aqueous HCl, 100 mL of 10% Na<sub>2</sub>S<sub>2</sub>O<sub>3</sub>, 50 mL of saturated aqueous NaCl and dried with anhydrous MgSO<sub>4</sub>. The reaction was filtered and evaporated by rotary evaporation to yield 3-(3-methyl-3H-diazirin-3-yl) propanoic acid (**2**) as a yellowish-white liquid. To the reaction mixture of 3-(3-methyl-3H-diazirin-3-yl) propanoic acid (**2**) was added 0.86 mL of DCM, to another 20 mL vial were added EDC·HCl, (345 mg, 1.8 mmol), NHS, (207 mg, 1.8 mmol) and dissolved in 1.2 mL of DCM. The two solutions were combined and left stirred overnight. The solvent was removed by rotary evaporation and the product was purified by column chromatography (Hexane:EtOAc, 60/40 v/v) to yield 2, 5-dioxopyrrolidin-1-yl 3-(3-methyl-3H-diazirin-3-yl) propanoate (**3**), (265 mg) as a white-yellowish solid. To a 20 mL vial was added 2-aminocyclopentanol (**4**), (64.6 mg, 0.64 mmol) and dissolved in 0.88 mL of DMF. To another 20 mL vial flask with a stirring magnet was added 2, 5-dioxopyrrolidin-1-yl 3-(3-methyl-3H-diazirin-3-yl) propanoate (**3**), (120 mg, 0.53 mmol). The vials were combined and TEA, (0.07 mL, 0.53 mmol) was added and left stirred overnight. The solvent was removed by rotary evaporation purified by column chromatography (EtOAc:Hexane, 90/10 v/v) to yield *N*-(2-hydroxycyclopentyl)-3-(3-methyl-3H-diazirin-3-yl) propanamide (**8**), as a white solid (43.3 mg, 38%), (**Scheme S8**).

<sup>1</sup>H NMR (400 MHz, CDCl<sub>3</sub>): δ 5.62 (br s, 1H), 4.34 (br s, 1H), 3.94-3.99 (dd, *J* = 13.6, 6.8 Hz, 1H), 3.78-85 (m, 1H), 2.08-2.17 (m, 1H), 1.98-2.05 (m, 3H), 1.63-1.7483 (m, 5H), 1.36-1.46 (ddd, *J* = 16.4, 12.8, 8.0 Hz, 1H), 1.04 (s, 1H).

<sup>13</sup>C NMR (101 MHz, CDCl<sub>3</sub>): δ 173.55, 79.80, 61.15, 32.75, 30.63, 30.47, 30.02, 25.55, 21.47, 20.13.

LC-MS *m/z* calculated for C<sub>10</sub>H<sub>17</sub>N<sub>3</sub>O<sub>2</sub> (M+H): 212.13. Found: 212.01.

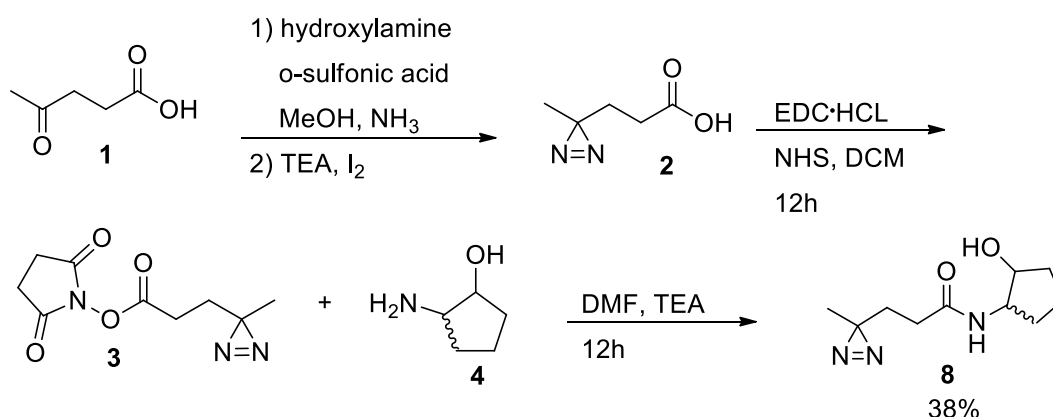

**Scheme S8.** Synthesis of **8**.

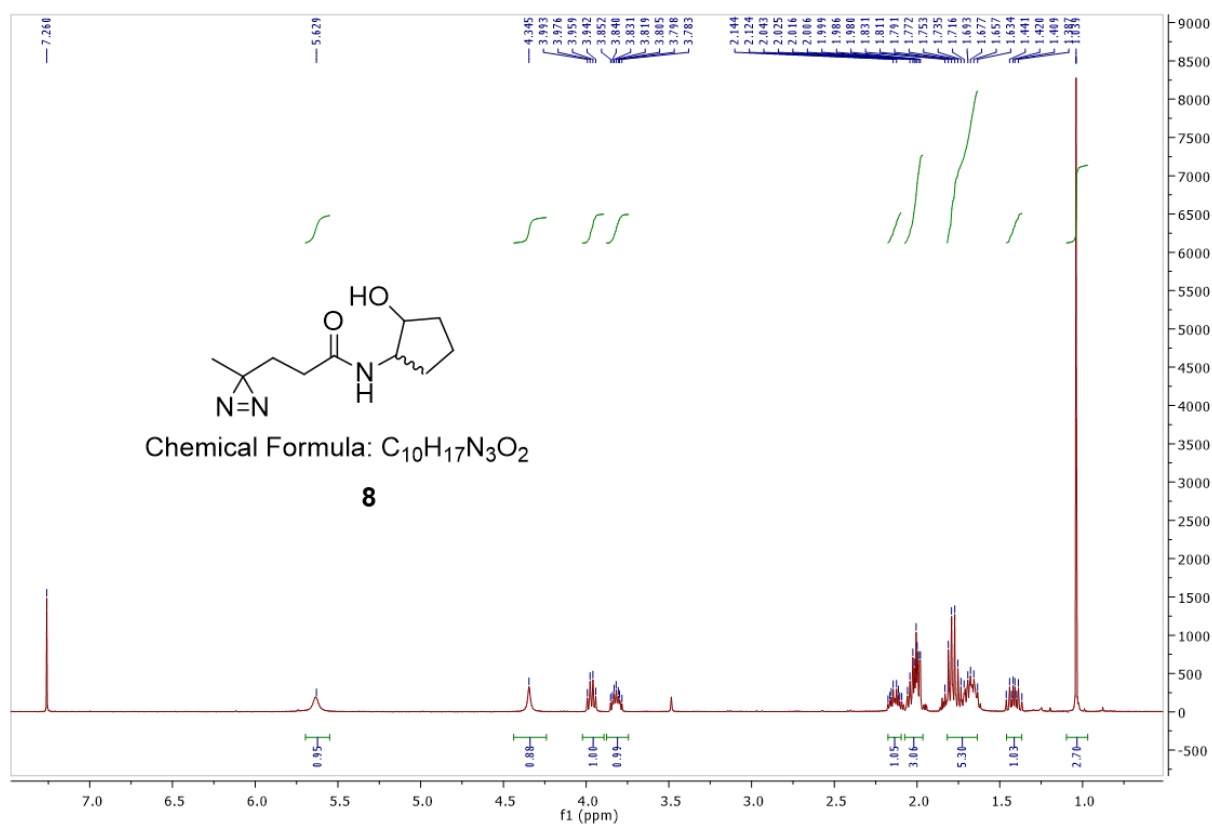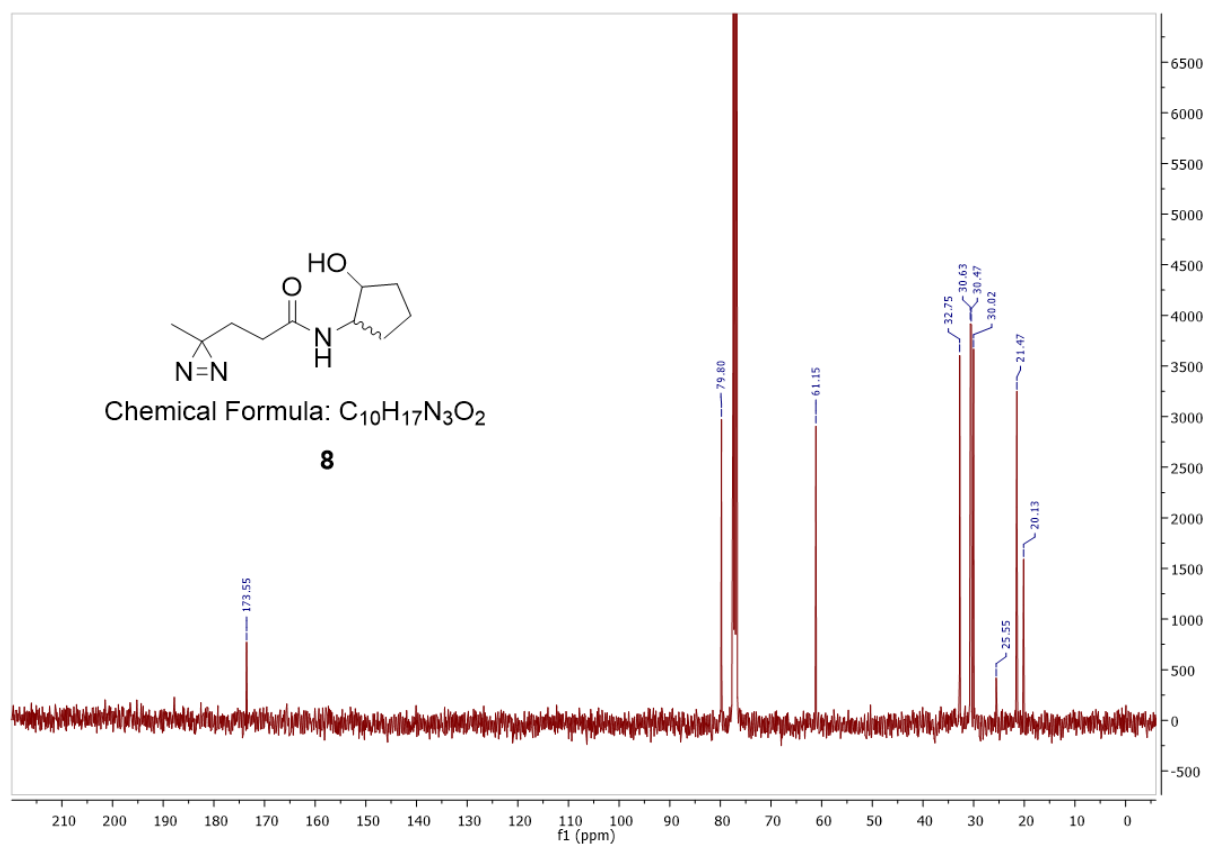

**Figure S15.**  $^1H$  NMR (upper spectrum) and  $^{13}C$  NMR (lower spectrum) of **8**.

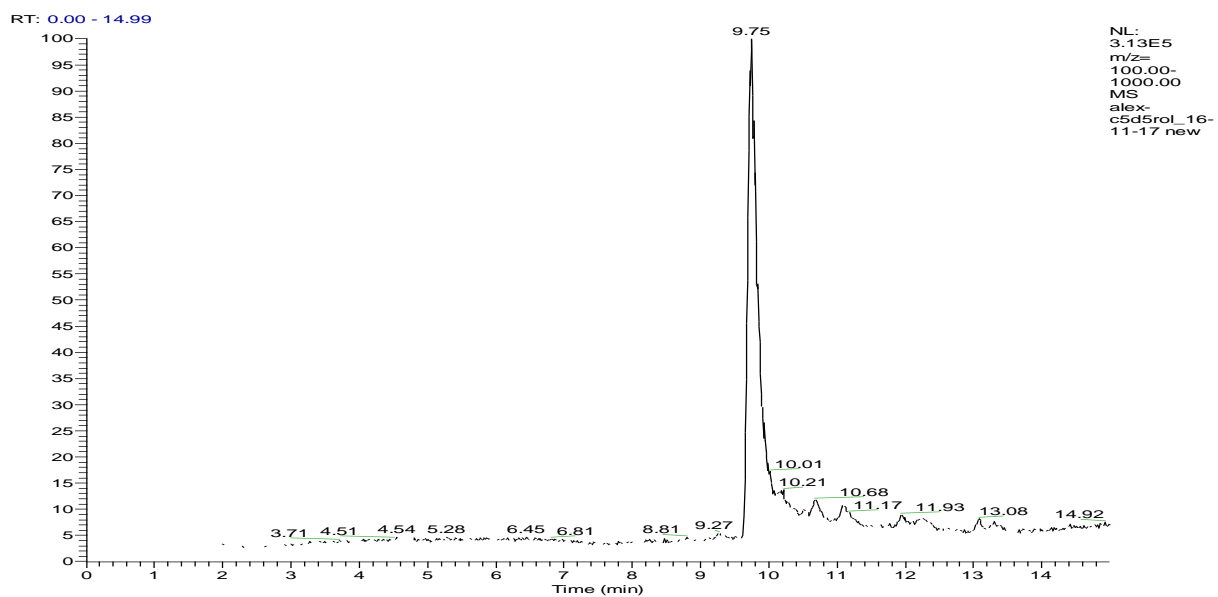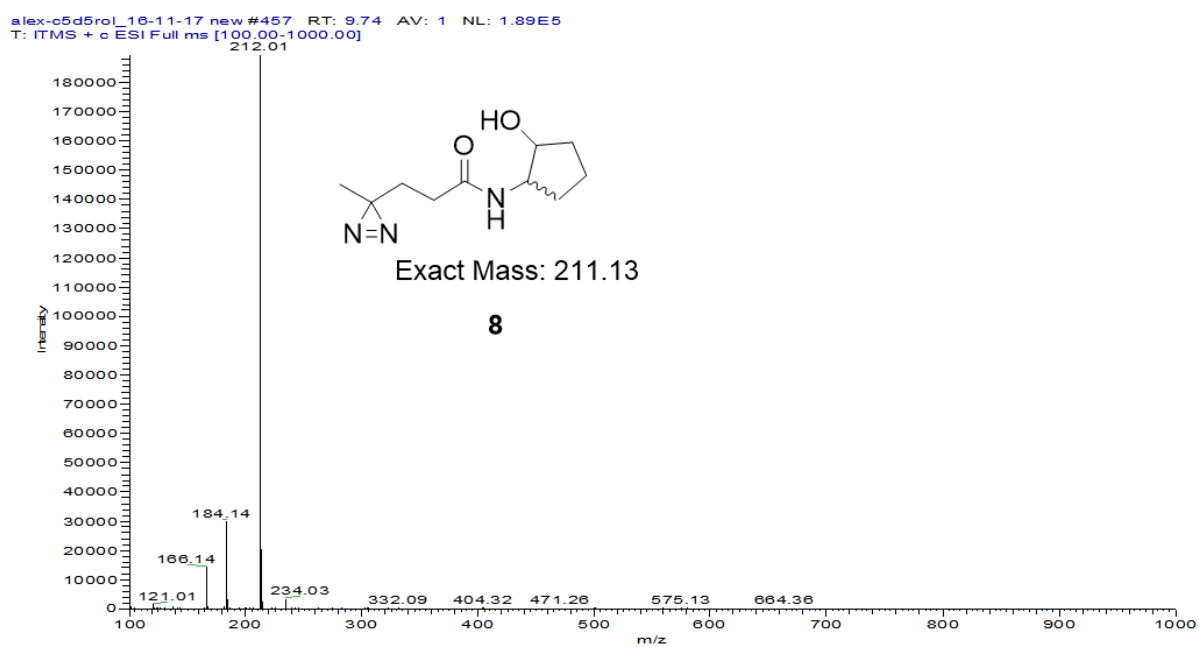

Figure S16. LC-MS of 8.

## Synthesis of 9

To a 20 mL vial was added 2-aminocyclohexanol (**1**), (73.6 mg, 0.64 mmol) and dissolved in 0.88 mL of DMF. To another 20 mL vial flask with a stirring magnet was added 2, 5-dioxopyrrolidin-1-yl 3-(3-methyl-3*H*-diazirin-3-yl) propanoate (**2**), (120 mg, 0.53 mmol). The vials were combined and TEA, (0.07 mL, 0.53 mmol) was added and left stirred overnight. The solvent was removed by rotary evaporation and the crude was purified by column chromatography (EtOAc:Hexane, 60/40 v/v) to yield *N*-(2-hydroxycyclohexyl)-3-(3-methyl-3*H*-diazirin-3-yl) propanamide (**9**) as a white solid (111 mg, 92%), (**Scheme S9**).

**<sup>1</sup>H NMR** (400 MHz, CDCl<sub>3</sub>): δ 5.45 (br s, 1H), 3.59-3.67 (m, 1H), 3.28-3.34 (m, 2H), 2.04-2.07 (m, 1H), 2.02 (t, *J* = 7.6 Hz, 2H), 1.93-1.97 (m, 1H), 1.76-1.86 (m, 2H), 1.68-1.75 (m, 2H), 1.13-1.38 (m, 4H), 1.04 (s, 3H).

**<sup>13</sup>C NMR** (101 MHz, CDCl<sub>3</sub>): δ 173.22, 75.56, 55.99, 34.55, 31.62, 30.91, 30.06, 25.67, 24.70, 24.12, 20.11.

**LC-MS** *m/z* calculated for C<sub>11</sub>H<sub>19</sub>N<sub>3</sub>O<sub>2</sub> (M+H): 226.15. Found: 226.03.

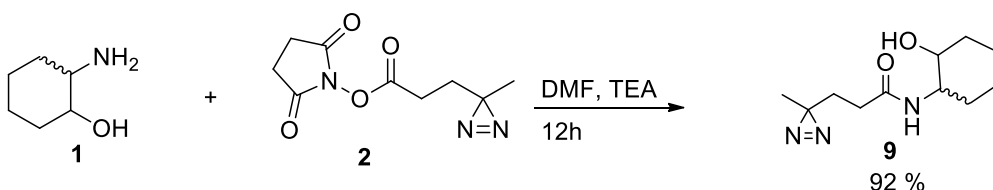

**Scheme S9.** Synthesis of **9**.

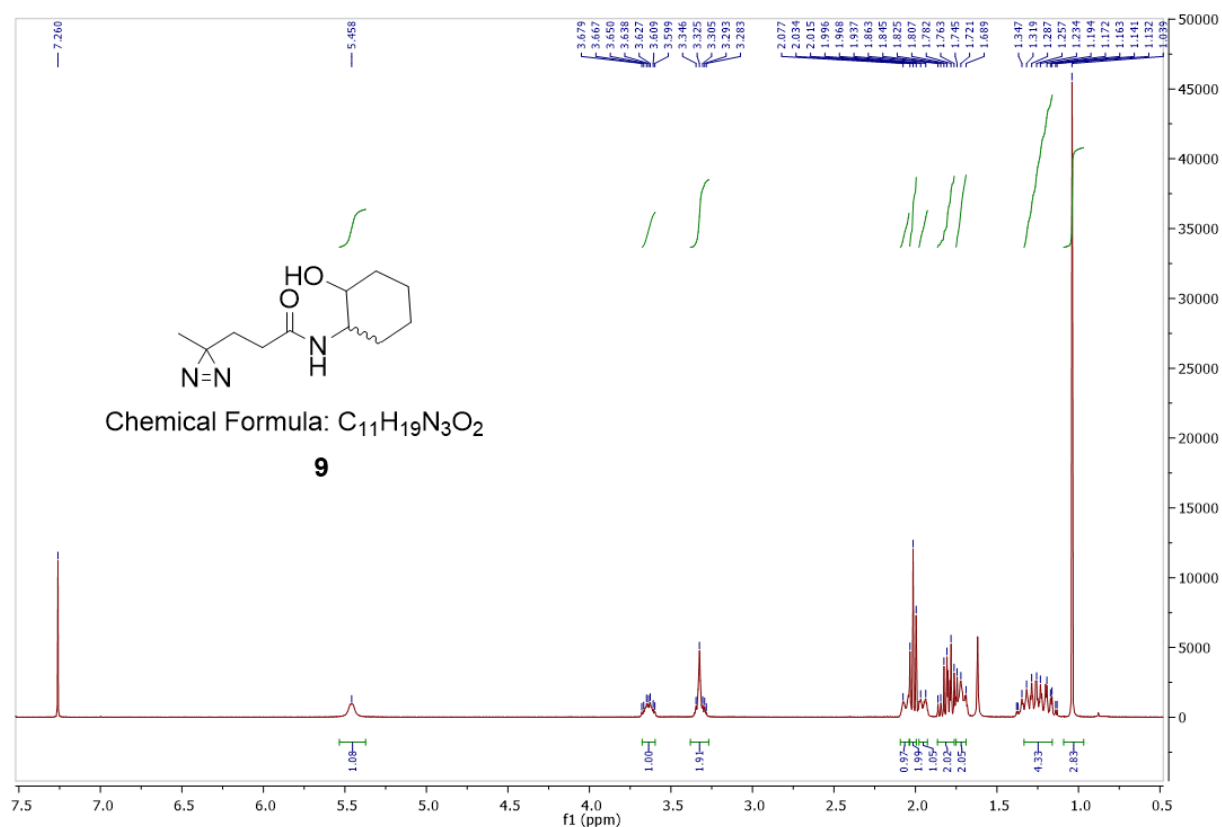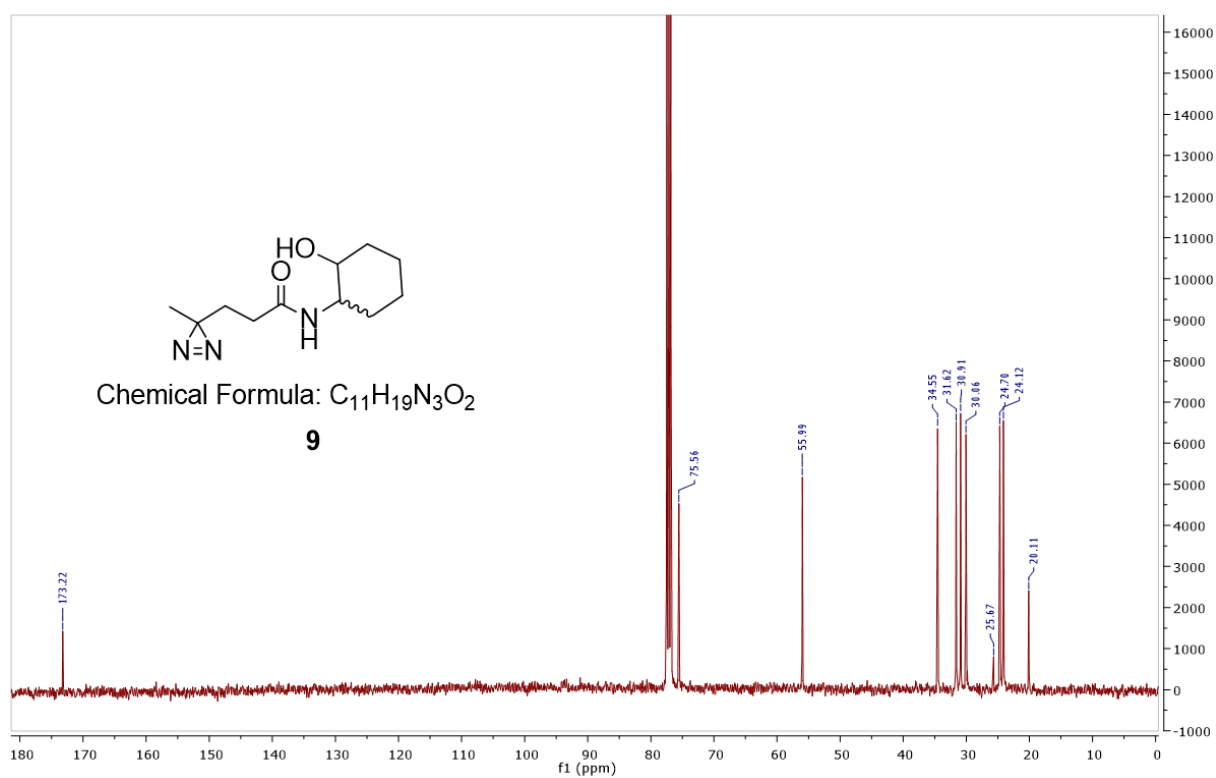

**Figure S17.**  $^1H$  NMR (upper spectrum) and  $^{13}C$  NMR (lower spectrum) of **9**.

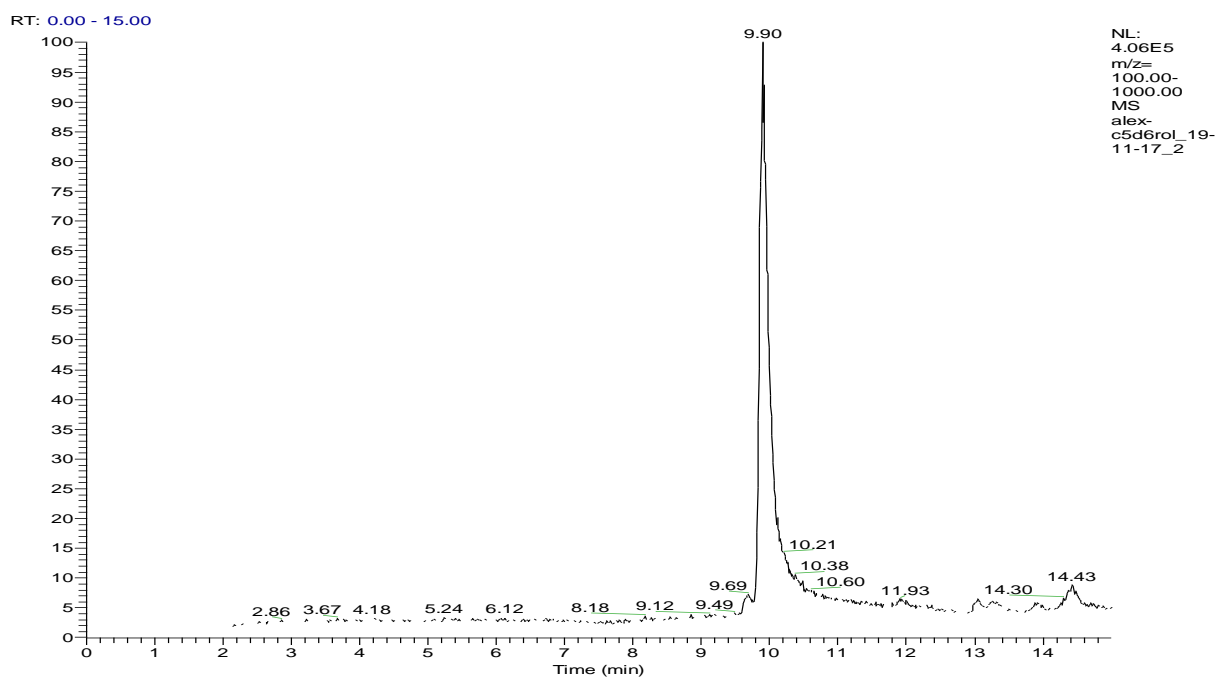

alex-c5d6rol 19-11-17 2 #481 RT: 9.90 AV: 1 NL: 2.44E5  
T: ITMS + c ESI Full ms [100.00-1000.00]

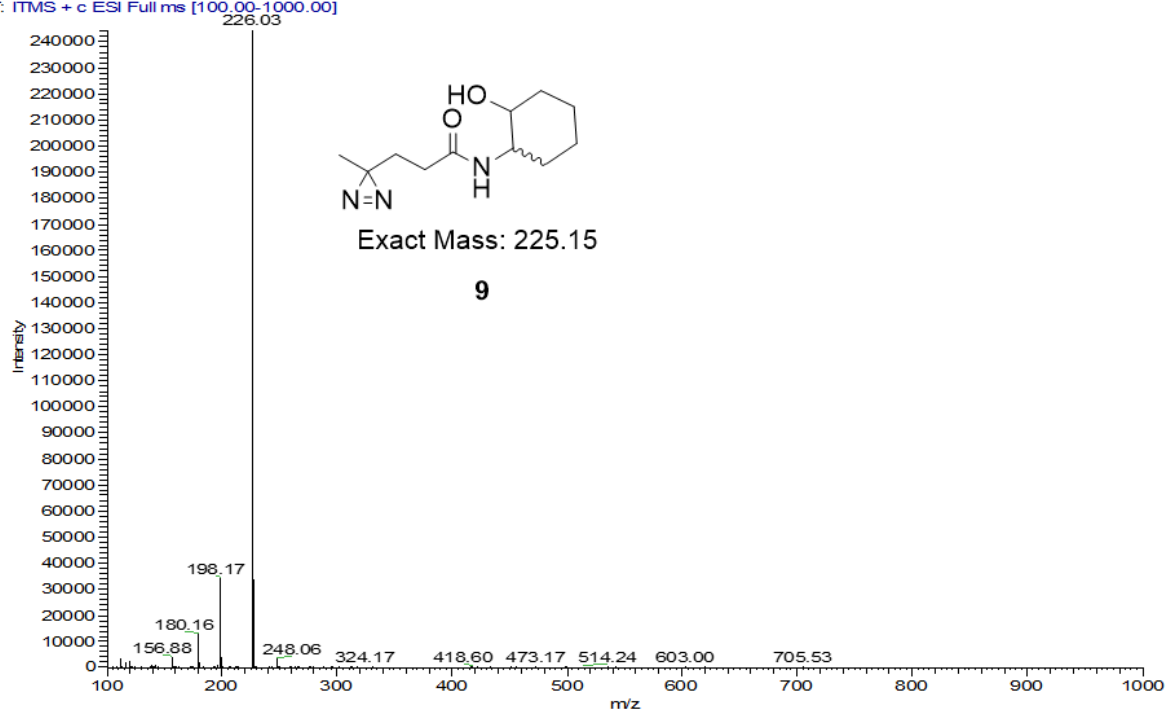

Figure S18. LC-MS of 9.

## Synthesis of 10

To a 500 mL round bottom flask with a stirring magnet, septum and N<sub>2</sub> atmosphere was added 4-hydroxy-2-butanone (**1**), (3 gr, 34 mmol). A balloon with a syringe was added through a rubber septum to maintain the ammonia environment and allowing the release of pressure. To the flask was added 8 N methanolic ammonia (33.8 mL) and the mixture was allowed to be stirred for 3 h at 0°C. Hydroxylamine-O-sulfonic acid 97%, (4.52 gr, 40 mmol) was dissolved in 28.9 mL of MeOH and added to the reaction mixture dropwise. The mixture was allowed to be stirred overnight. The ammonia was removed by blowing air into the flask. The solvents were concentrated by rotary evaporation to give yellowish liquid. The reaction flask was covered with aluminum foil to minimize exposure to light and 50 mL of MeOH was added to re-dissolve the diaziridine acid. The reaction flask was placed in an ice-water bath and the mixture was allowed to be stirred for 5 min with a rubber septum cap. TEA, (7.2 mL, 34 mmol) was added drop-wise and the mixture was allowed to be stirred for 5 min. Using a spatula, 6.4 gr' of iodine chips were added slowly to the stirring reaction mixture until the solution stayed persistently red-brown more than 5 min. The reaction mixture was mixed with 100 mL of EtOAc and transferred to a separatory funnel, washed with 100 mL of 1 M aqueous HCl, 100 mL of 10% Na<sub>2</sub>S<sub>2</sub>O<sub>3</sub>, 50 mL of saturated aqueous NaCl and dried with anhydrous MgSO<sub>4</sub>. The reaction was filtered and evaporated by rotary evaporation to yield 2-(3-methyl-3H-diazirin-3-yl) ethanol (**2**), as a yellowish-white liquid. To the reaction mixture of 2-(3-methyl-3H-diazirin-3-yl) ethanol (**2**) was added 6.2 mL of THF and drop-wise 22.6 mL of Jones reagent (CrO<sub>3</sub>/H<sub>2</sub>SO<sub>4</sub>) and the mixture was allowed to be stirred for 2 h. The reaction was quenched with 100 mL of isopropanol. Water and EtOAc 1:1 were added to extract the product. The aqueous layer was extracted with EtOAc several times until the acid spot vanishes from TLC. The layers were separated and the organic layer was dried over MgSO<sub>4</sub>. The solvent was removed under reduced pressure, yielding 2-(3-methyl-3H-diazirin-3-yl) acetic acid (**3**), as a yellowish oil. To the reaction mixture of 2-(3-methyl-3H-diazirin-3-yl) acetic acid (**3**) was added 19.1 mL of DCM. To another 50 mL flask were added EDC·HCL, (6.51 gr', 34 mmol), NHS, (3.91 gr', 34 mmol) and dissolved in 23.8 mL of DCM. The two solutions were combined and left stirred overnight. The solvent was removed by rotary evaporation and the product was purified by column chromatography (EtOAc:Hexane, 75/25 v/v) to yield 2, 5-dioxopyrrolidin-1-yl 2-(3-methyl-3H-diazirin-3-yl) acetate (**4**), (2.033 gr') as a white-yellowish solid. To a 20 mL vial was added 2-aminocyclopentanol (**5**), (344 mg, 3.4 mmol) and dissolved in 5 mL of DMF. To another 20 mL flask with a stirring magnet was added 2, 5-dioxopyrrolidin-1-yl 2-(3-methyl-3H-diazirin-3-yl) acetate (**4**), (600 mg, 2.84 mmol). The vial was added to the 50 mL flask and TEA (0.07 mL, 0.53 mmol) was added and left stirred overnight. The solvent was removed by rotary evaporation and diluted with EtOAc. DMF was removed by aqueous CuSO<sub>4</sub> and the product was extracted with EtOAc. The solvent was removed by rotary evaporation and the crude was purified by column chromatography (EtOAc:Hexane, 50/50 v/v) to yield *N*-(2-hydroxycyclopentyl)-2-(3-methyl-3H-diazirin-3-yl) acetamide (**10**) as a white solid. (122 mg, 22%), (**Scheme S10**).

<sup>1</sup>H NMR (400 MHz, CDCl<sub>3</sub>): δ 5.91 (br s, 1H), 4.22 (br s, 1H), 3.95-4.00 (dd, *J* = 12.8, 6.4 Hz, 1H), 3.80-3.87 (m, 1H), 2.12 – 2.20 (m, 2H), 1.99 – 2.07 (m, 1H), 1.62 – 1.86 (m, 4H), 1.40-1.49 (ddd, *J* = 16.4, 12.8, 8.4 Hz, 1H), 1.15 (s, 3H).

<sup>13</sup>C NMR (101 MHz, CDCl<sub>3</sub>): δ 170.11, 79.71, 61.18, 42.70, 32.76, 30.65, 23.85, 21.51, 19.95.

LC-MS *m/z* calculated for C<sub>9</sub>H<sub>15</sub>N<sub>3</sub>O<sub>2</sub> (M+H): 198.12. Found: 198.00.

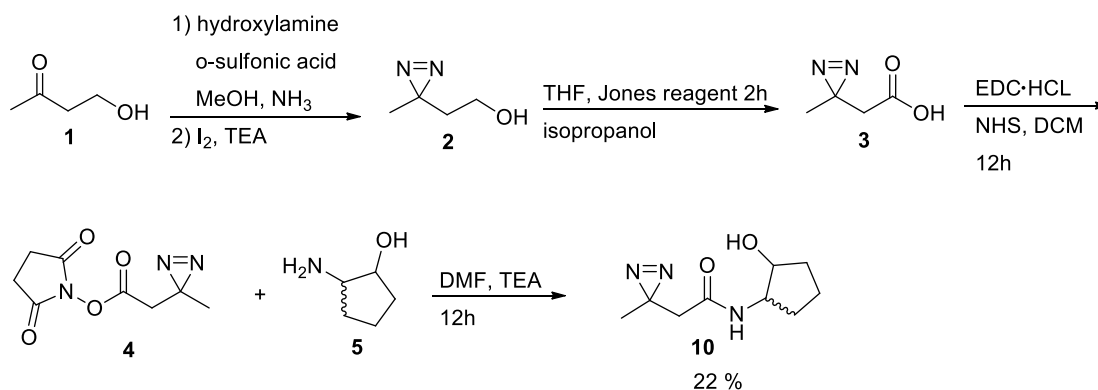

**Scheme S10.** Synthesis of **10**.

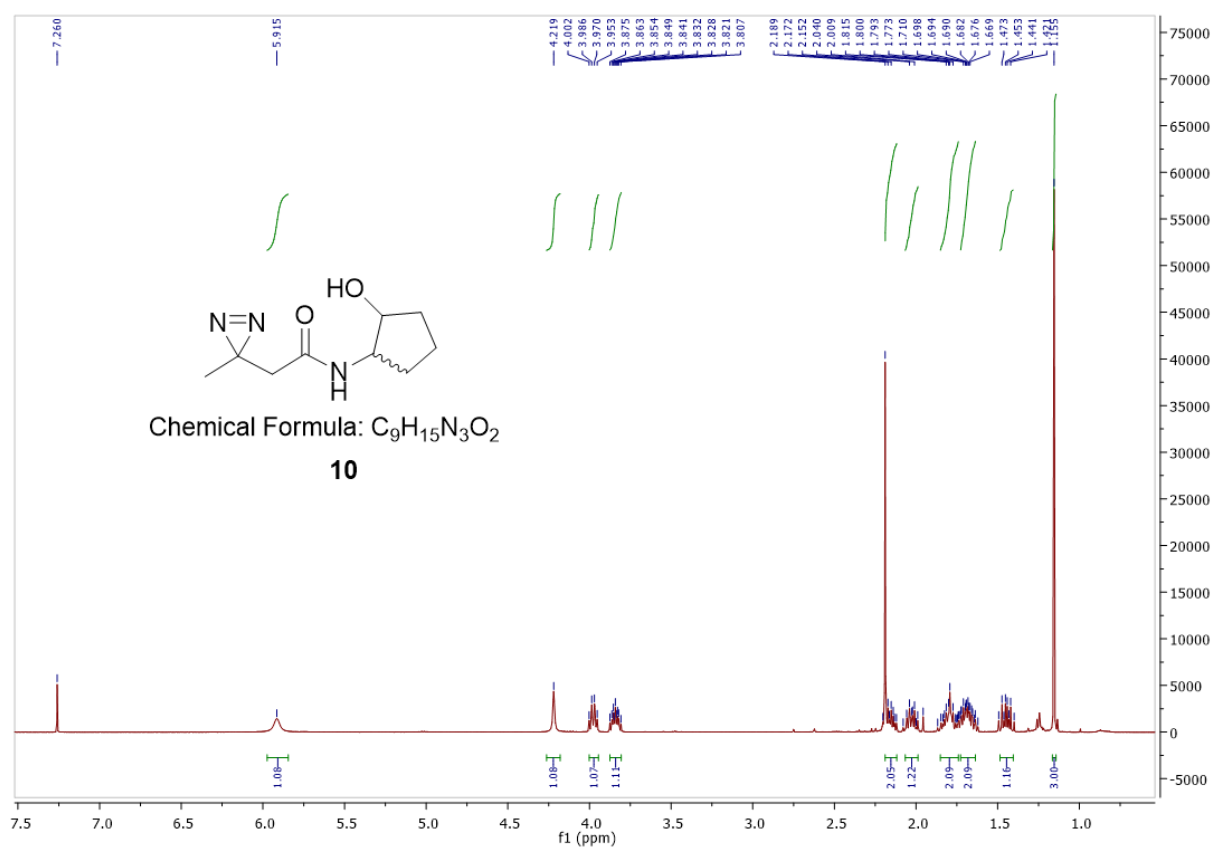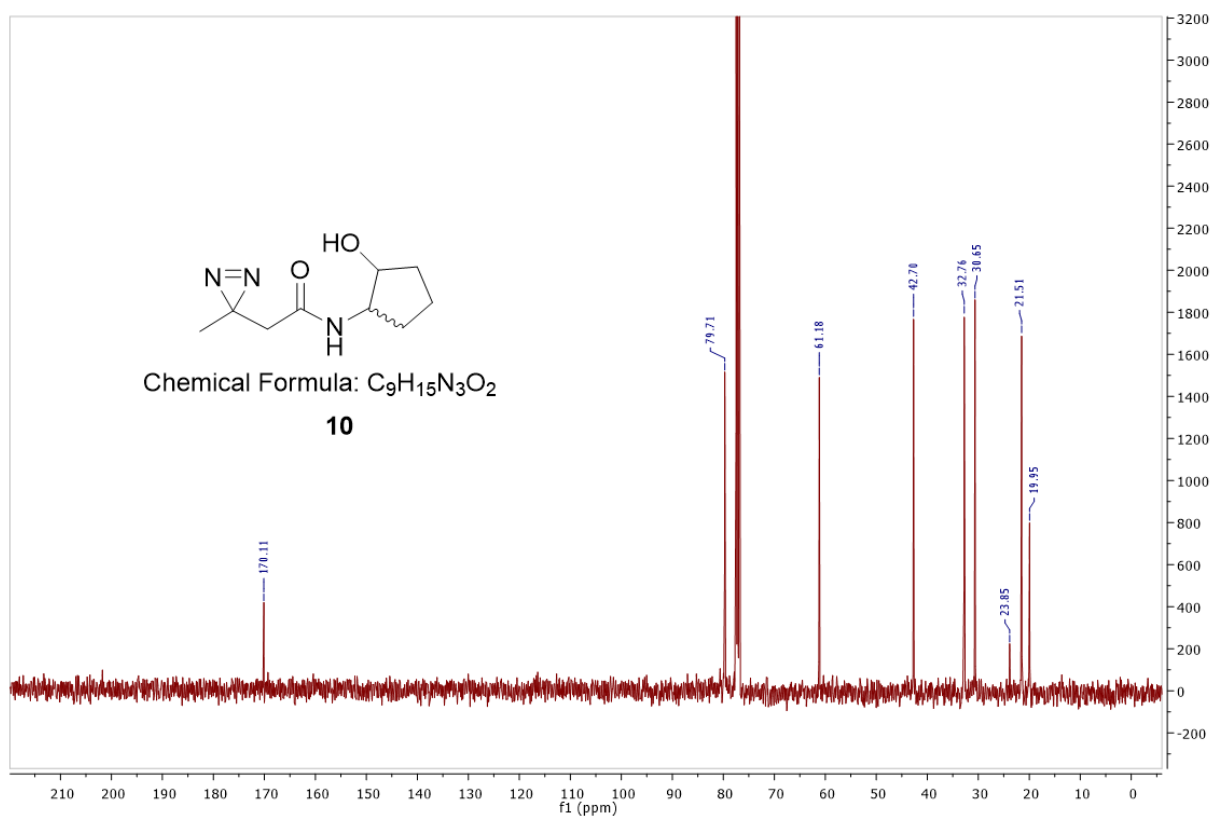

**Figure S19.**  $^1H$  NMR (upper spectrum) and  $^{13}C$  NMR (lower spectrum) of **10**.



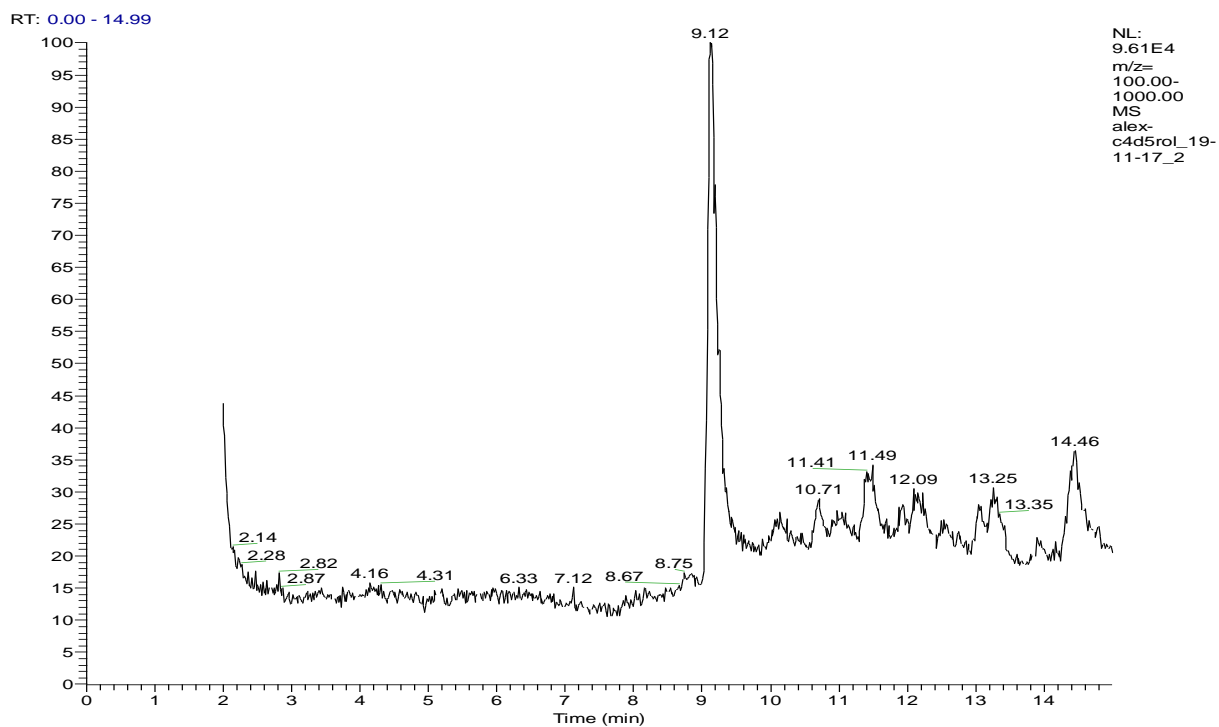

alex-c4d5rol 19-11-17 2 #449 RT: 9.12 AV: 1 NL: 5.30E4  
T: ITMS + c ESI Full ms [100.00-1000.00]

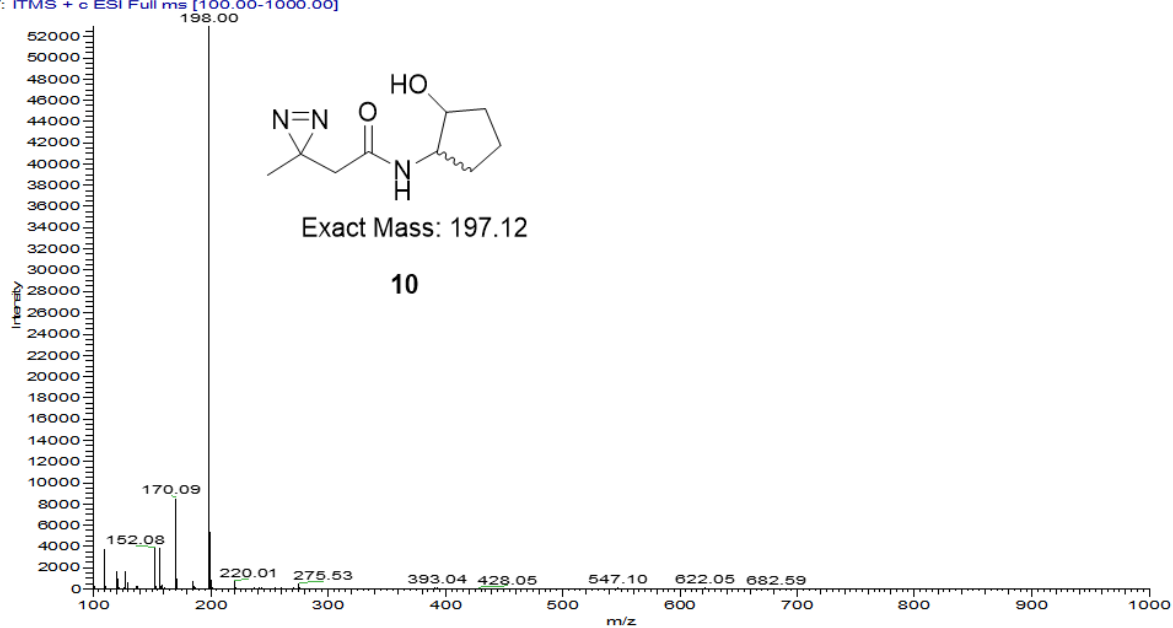

Figure S20. LC-MS of 10.

## Synthesis of 11

To a 20 mL vial was added 2-aminocyclohexanol (**1**), (393 mg, 3.4 mmol) and dissolved in 5 mL of DMF. To a 50 mL flask with a stirring magnet was added 2, 5-dioxopyrrolidin-1-yl 2-(3-methyl-3*H*-diazirin-3-yl) acetate (**2**), (600 mg, 2.84 mmol). The vial was added to the 50 mL flask, and TEA, (0.47 mL, 3.4 mmol) was added and left stirred overnight. The solvent was removed by rotary evaporation and the crude was purified by column chromatography (EtOAc:DCM, 90/10 v/v) to yield *N*-(2-hydroxycyclohexyl)-2-(3-methyl-3*H*-diazirin-3-yl) acetamide (**11**) as a white solid (188.6 mg, 31%), (**Scheme S11**).

**<sup>1</sup>H NMR** (400 MHz, CDCl<sub>3</sub>): δ 5.71 (br s, 1H), 3.62-3.71 (m, 1H), 3.31-3.37 (td, *J* = 10.0, 4.4 Hz, 1H), 2.15-2.25 (AB q, *J* = 23.6, 15.2 Hz, 2H), 1.97-2.08 (m, 2H), 1.70-1.76 (m, 2H), 1.20-1.38 (m, 5H), 1.16 (s, 3H).

**<sup>13</sup>C NMR** (101 MHz, CDCl<sub>3</sub>): δ 169.67, 75.35, 56.09, 43.15, 34.70, 31.68, 24.67, 24.15, 23.95, 19.88.

**LC-MS** *m/z* calculated for C<sub>10</sub>H<sub>17</sub>N<sub>3</sub>O<sub>2</sub> (M+H): 212.13. Found: 212.01.

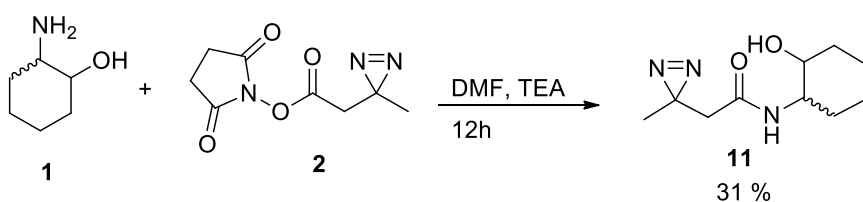

**Scheme S11.** Synthesis of **11**.

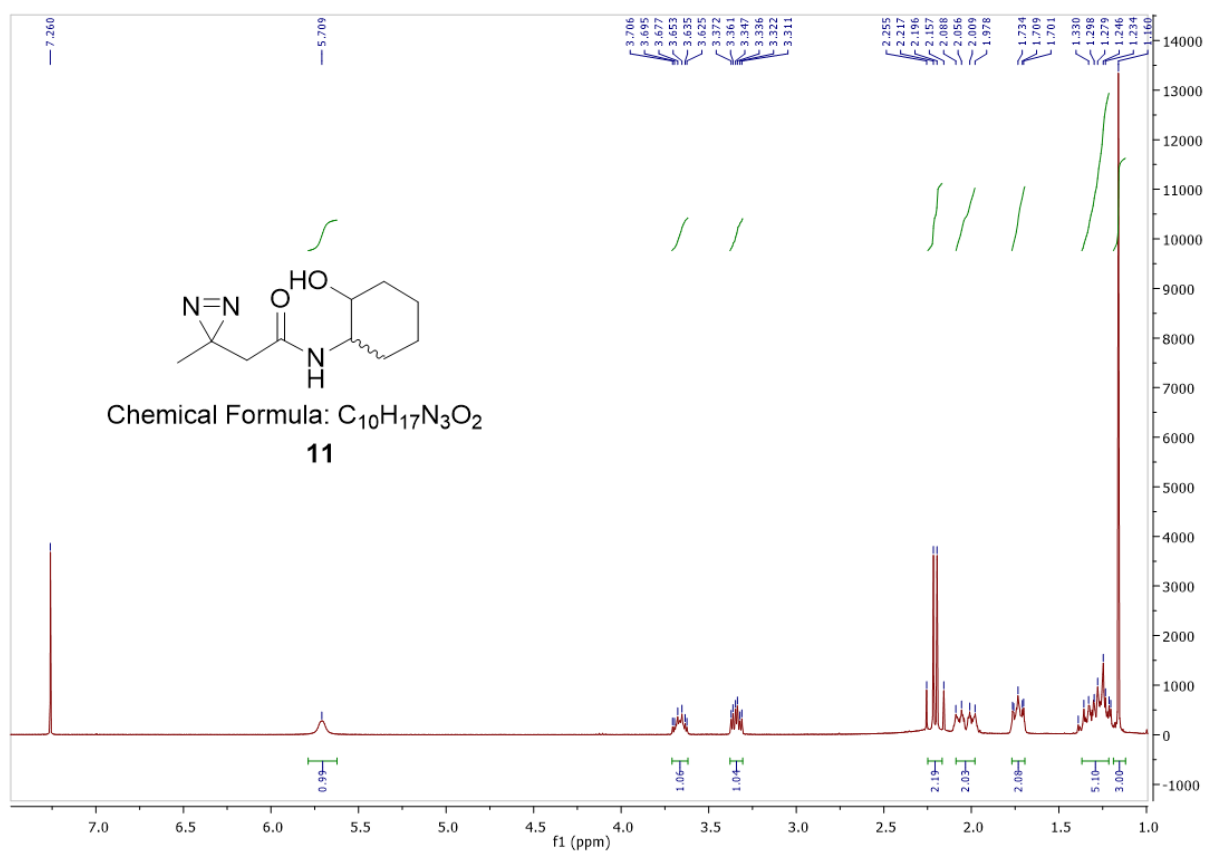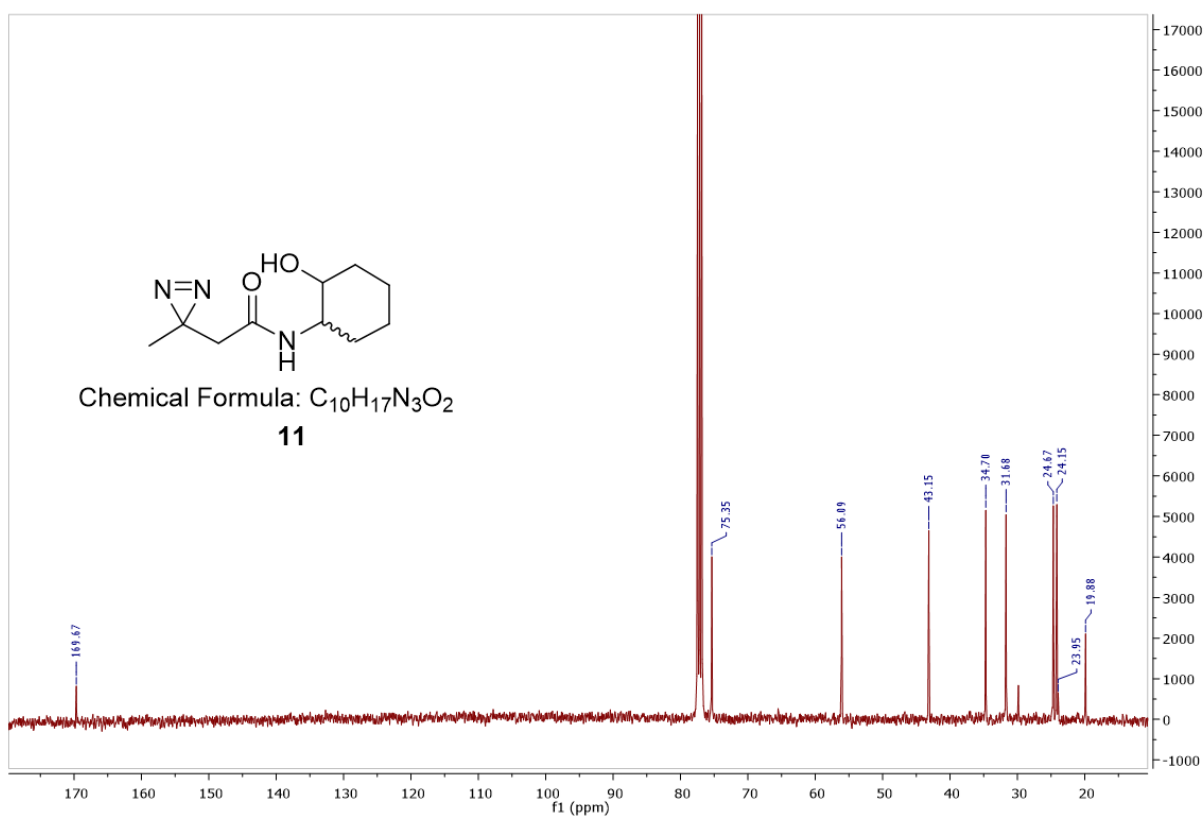

Figure S21.  $^1H$  NMR (upper spectrum) and  $^{13}C$  NMR (lower spectrum) of **11**.

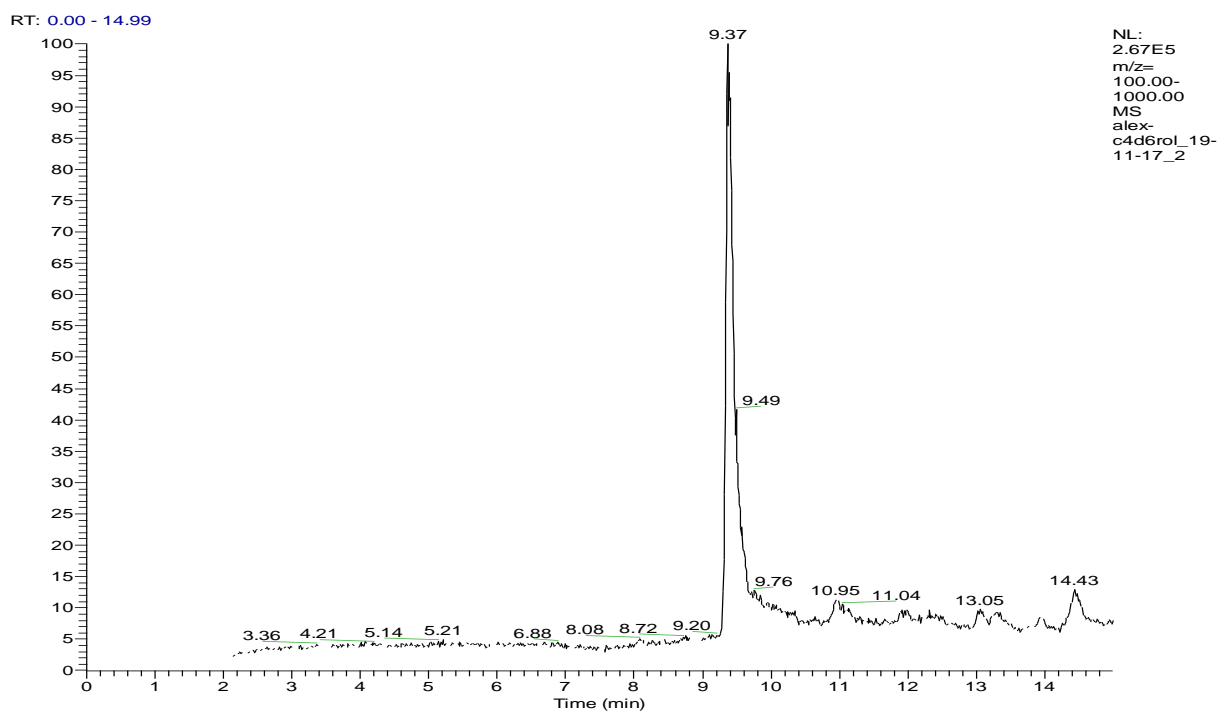

alex-c4d6rol 19-11-17 2#439 RT: 9.34 AV: 1 NL: 1.25E5  
T: ITMS + c ESI Full ms [100.00-1000.00]

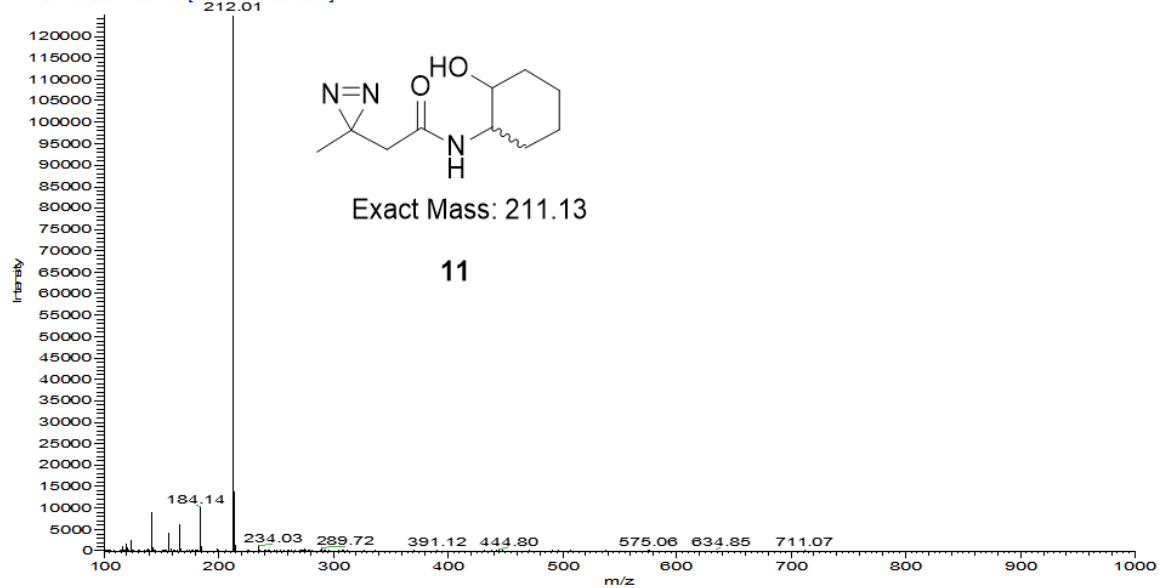

Figure S22. LC-MS of 11.

## Synthesis of 12

To a vial, 20 mL with a stirring magnet was added 4-pentynoic acid (**1**), (153.55 mg, 1.56 mmol) and dissolved in 1 mL of DCM. To another 20 mL vial were added EDC·HCl, (198 mg, 1.72 mmol), NHS, (330 mg, 1.72 mmol) and dissolved in 1.5 mL of DCM. The two solutions were combined and left stirred overnight. The solvent was removed by rotary evaporation and purified by column chromatography (EtOAc:Hexane, 50/50 v/v) to yield 2, 5-dioxopyrrolidin-1-yl pent-4-ynoate (**2**), (248.2 mg, 81%) as white solid. To a 20 mL vial was added 2-aminocyclohexanol (**3**), (175 mg, 1.52 mmol) and dissolved in 1.1 mL of DMF. To another 20 mL vial flask with a stirring magnet was added 2, 5-dioxopyrrolidin-1-yl pent-4-ynoate (**2**), (248.8 mg, 1.27 mmol) and dissolved in 1.1 mL of DMF. The vials were combined and TEA, (0.35 mL, 2.54 mmol) was added and left stirred overnight. The solvent was removed by rotary evaporation and diluted with EtOAc. DMF was removed by aqueous CuSO<sub>4</sub> and the product was extracted with EtOAc. The solvent was removed by rotary evaporation and the crude was purified by column chromatography with EtOAc to yield *N*-(2-hydroxycyclohexyl) pent-4-ynamide (**4**), (224 mg, 75%) as a white solid. To a 20 mL vial was added *N*-(2-hydroxycyclohexyl) pent-4-ynamide (**4**), (224 mg, 1.14 mmol) and dissolved in 1.63 mL of DCM. Dess-martin periodinane, (725 mg, 1.71 mmol) was added to the vial and the mixture was stirred with a magnet and left overnight. To a 100 mL flask was added 25 mL water and the reaction mixture, 50 mL of 10% NaHCO<sub>3</sub>, and an equal amount of DCM. The two phases were separated and the organic phase was dried over MgSO<sub>4</sub>. The solvent was removed by rotary evaporation and purified by column chromatography (EtOAc:Hexane, 50/50 v/v) to yield *N*-(2-oxocyclohexyl) pent-4-ynamide (**5**) as a white solid (158.7 mg, 72%). To a 4 mL vial with a stirring magnet, septum and N<sub>2</sub> atmosphere was added *N*-(2-oxocyclohexyl) pent-4-ynamide (**5**), (49.8 mg, 0.26 mmol). A balloon with a syringe was added through a rubber septum to maintain the ammonia environment and allowing the release of pressure. To the flask was added 0.7 mL of 8 N methanolic ammonia and the mixture was allowed to be stirred for 3 h at 0°C. Hydroxylamine-O-sulfonic acid 97%, (44.2 mg, 0.39 mmol) was dissolved in 0.22 mL of MeOH and added to the reaction mixture dropwise. The mixture was allowed to be stirred overnight. The ammonia was removed by blowing air into the flask. The solvents were concentrated by rotary evaporation to give yellowish liquid. The reaction flask was covered with aluminum foil to minimize exposure to light and 0.5 mL of MeOH was added to re-dissolve the diaziridine acid. The reaction flask was placed in an ice-water bath and the mixture was allowed to be stirred for 5 min with a rubber septum cap. TEA, (0.055 mL, 0.26 mmol) was added drop-wise and the mixture was allowed to be stirred for 5 min. Tert-butyl hypochlorite, (32 μL, 0.28 mmol) was added dropwise and the mixture was allowed to be stirred for 24 h. The reaction was evaporated by rotary evaporation and purified by column chromatography (EtOAc:Hexane, 25/75 v/v) to yield *N*-(1,2-diazaspiro [2.5] oct-1-en-4-yl) pent-4-ynamide (**12**) as a yellowish-white solid (26.9 mg, 51%), (**Scheme S12**).

<sup>1</sup>H NMR (400 MHz, CDCl<sub>3</sub>): δ 4.91 (br s, 1H), 4.02-4.08 (m, 1H), 2.42-2.46 (m, 2H), 2.23-2.26 (t, *J* = 7.2 Hz, 2H), 2.00-2.02 (br t, *J* = 2.4 Hz, 1H), 1.83-1.87 (m, 1H), 1.69-1.76 (m, 2H), 1.52-1.60 (m, 4H), 0.74-0.81 (m, 1H).

<sup>13</sup>C NMR (101 MHz, CDCl<sub>3</sub>): δ 170.20, 82.89, 69.70, 48.05, 35.25, 32.07, 30.74, 30.12, 24.21, 24.06, 14.92.

LC-MS *m/z* calculated for C<sub>11</sub>H<sub>15</sub>N<sub>3</sub>O (M+H): 206.12. Found: 205.93.

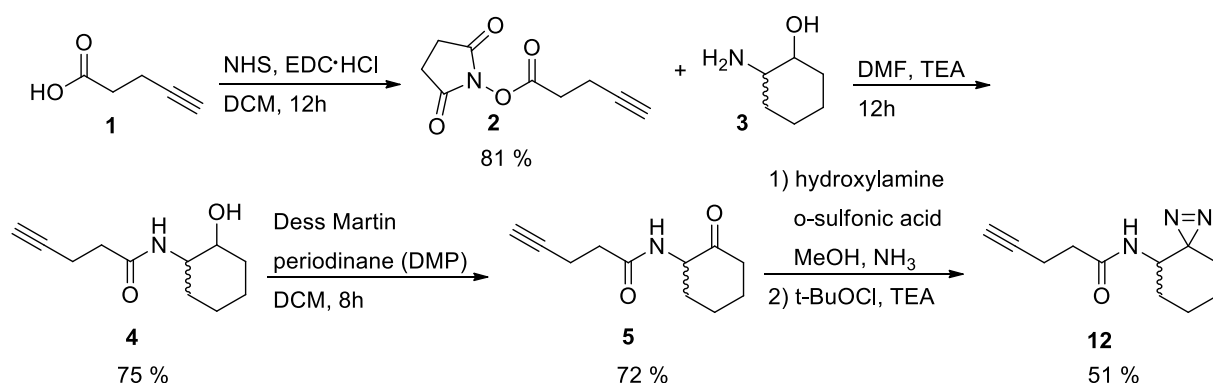

**Scheme S12.** Synthesis of **12**.

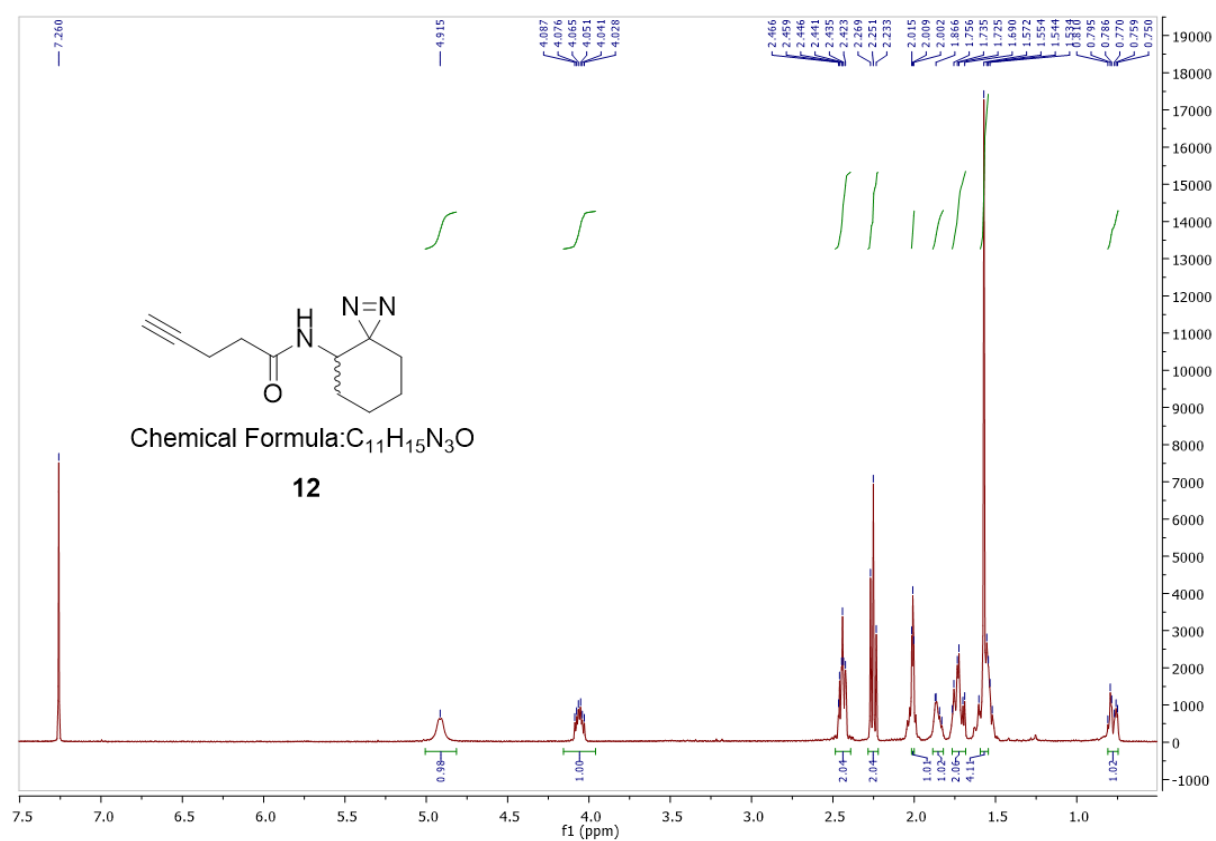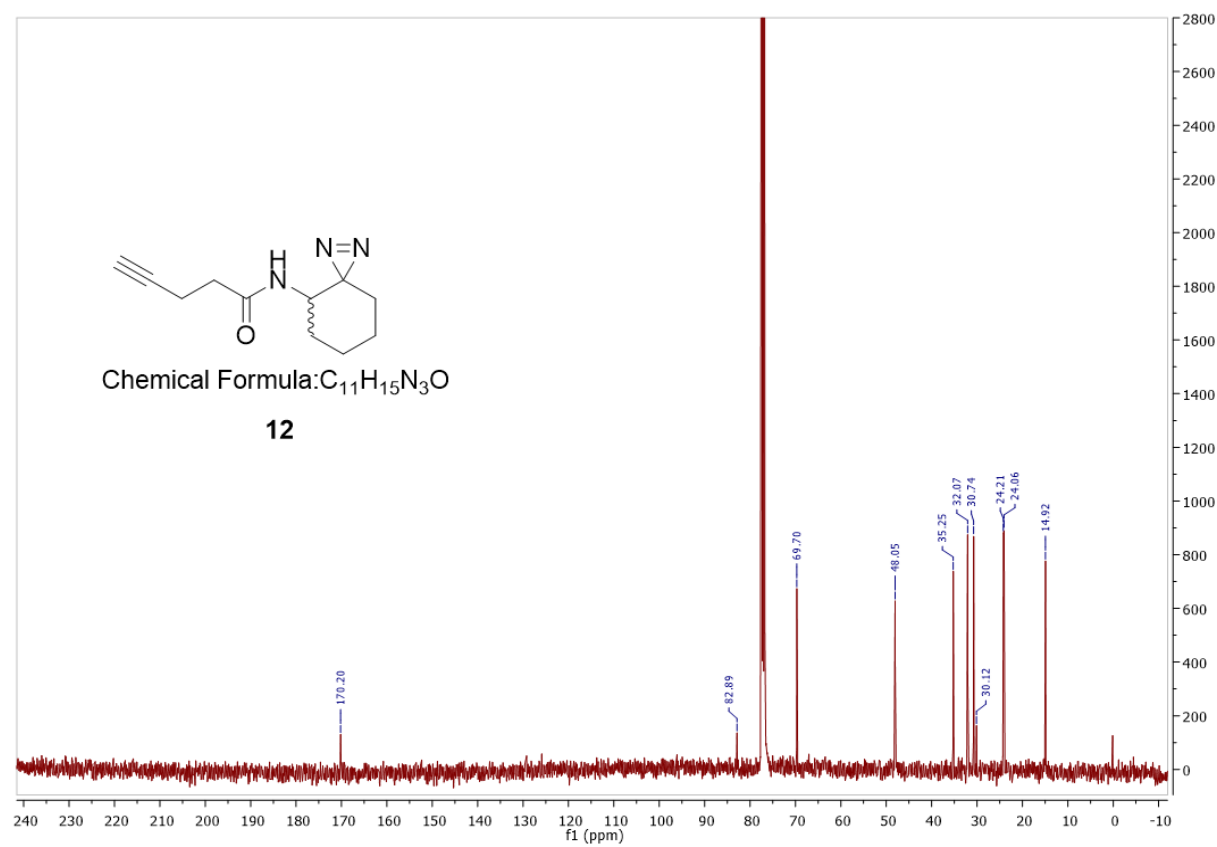

Figure S23.  $^1H$  NMR (upper spectrum) and  $^{13}C$  NMR (lower spectrum) of **12**.

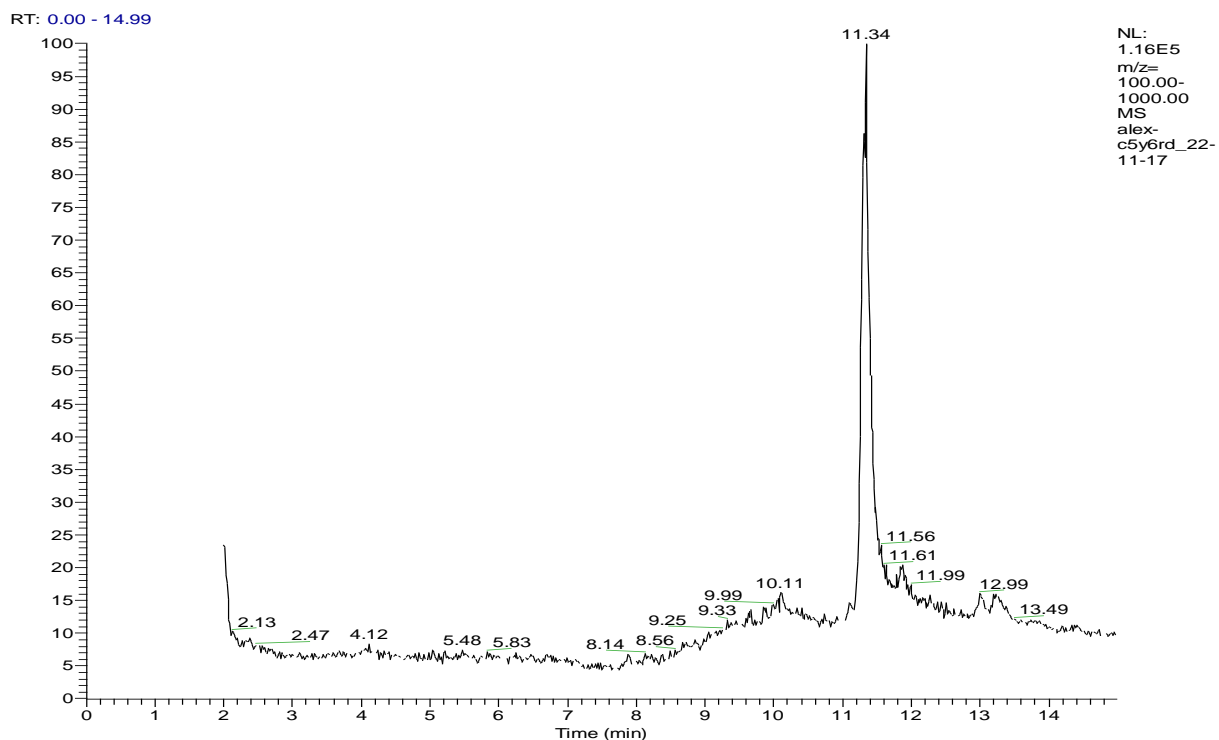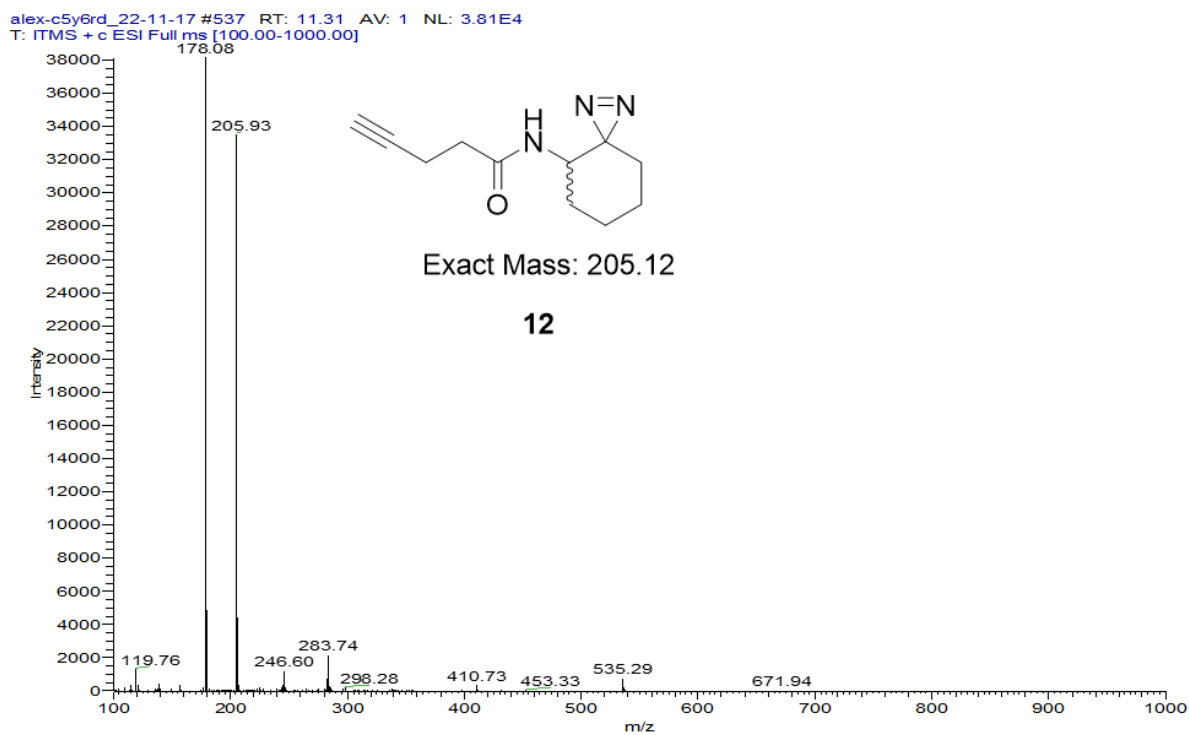

Figure S24. LC-MS of **12**.

## Synthesis of 13

To a 4 mL vial was added *N*-(2-hydroxycyclohexyl)-2-(3-methyl-3*H*-diazirin-3-yl) acetamide (**1**), (150 mg, 0.71 mmol) and dissolved in 2 mL of DCM. Dess-martin periodinane, (451 mg, 1.065 mmol) was added to the vial and the mixture was stirred with a magnet and left overnight. To a 100 mL flask was added 25 mL water and the reaction mixture, 50 mL of 10% NaHCO<sub>3</sub> and equal amount of DCM. The two phases were separated and the organic phase was dried over MgSO<sub>4</sub>. The solvent was removed by rotary evaporation and purified by column chromatography (EtOAc:Hexane, 50/50 v/v) to yield 2-(3-methyl-3*H*-diazirin-3-yl)-*N*-(2-oxocyclohexyl) acetamide (**13**) as a white solid (122.4 mg, 82%), (**Scheme S13**).

<sup>1</sup>H NMR (400 MHz, CDCl<sub>3</sub>): δ 6.61 (br s, 1H), 4.45-4.51 (m, 1H), 2.65-2.71 (m, 1H), 2.52-2.57 (m, 1H), 2.40 (td, *J* = 13.6, 6.4 Hz, 1H), 2.16-2.24 (app AB q, *J* = 21.2, 15.6 Hz, 2H), 2.13-2.15 (m, 1H), 1.85-1.91 (m, 1H), 1.74-1.83 (m, 1H), 1.59-1.71 (m, 1H), 1.37 (qd, *J* = 12.4, 4.0 Hz, 1H), 1.15 (s, 1H).

<sup>13</sup>C NMR (101 MHz, CDCl<sub>3</sub>): δ 207.40, 167.49, 58.22, 42.83, 41.07, 35.37, 28.00, 23.99, 23.60, 19.82.

LC-MS *m/z* calculated for C<sub>10</sub>H<sub>15</sub>N<sub>3</sub>O<sub>2</sub> (M+H): 210.12. Found: 210.01.

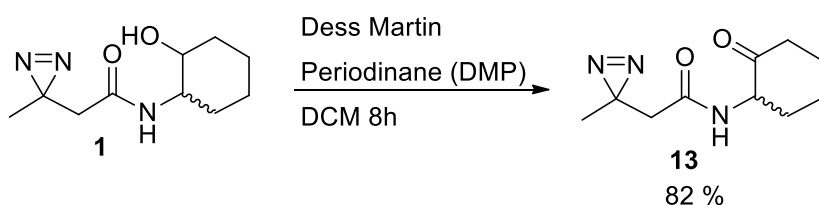

**Scheme S13.** Synthesis of **13**.



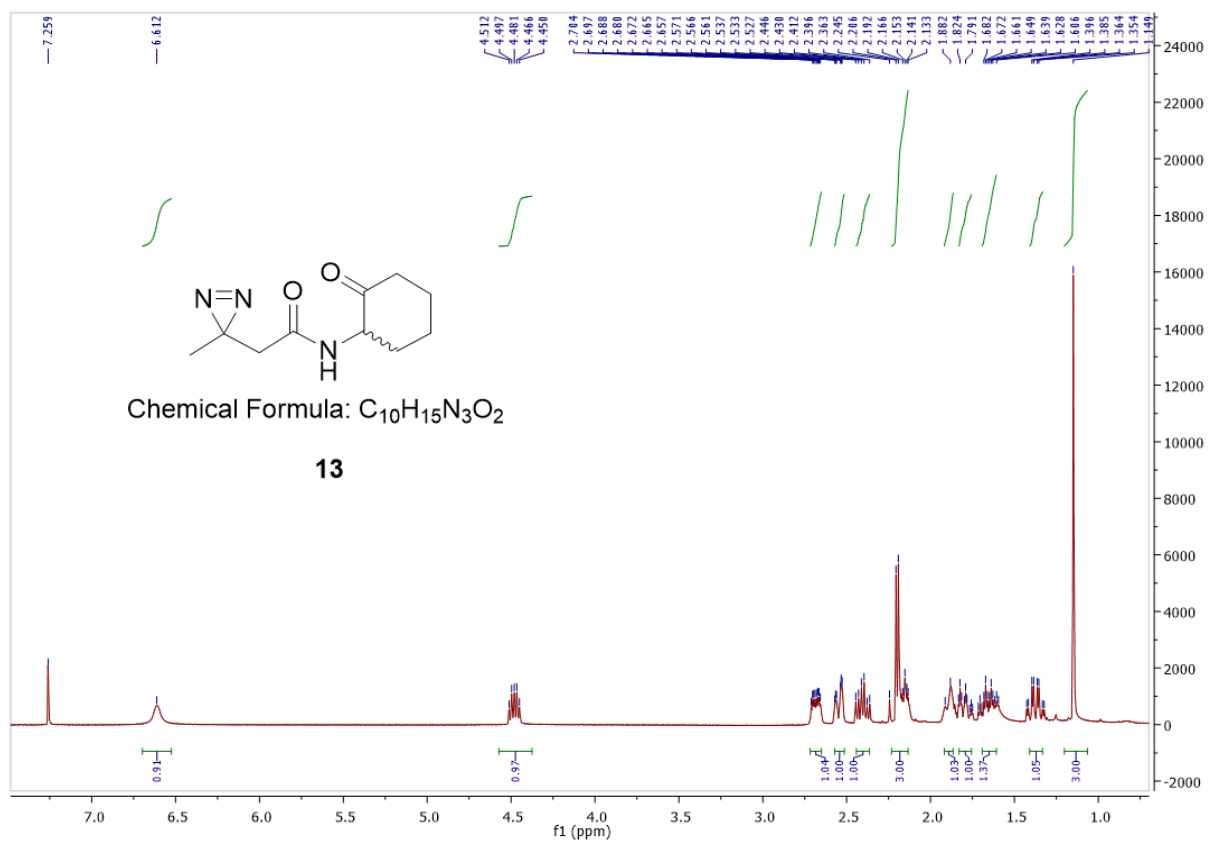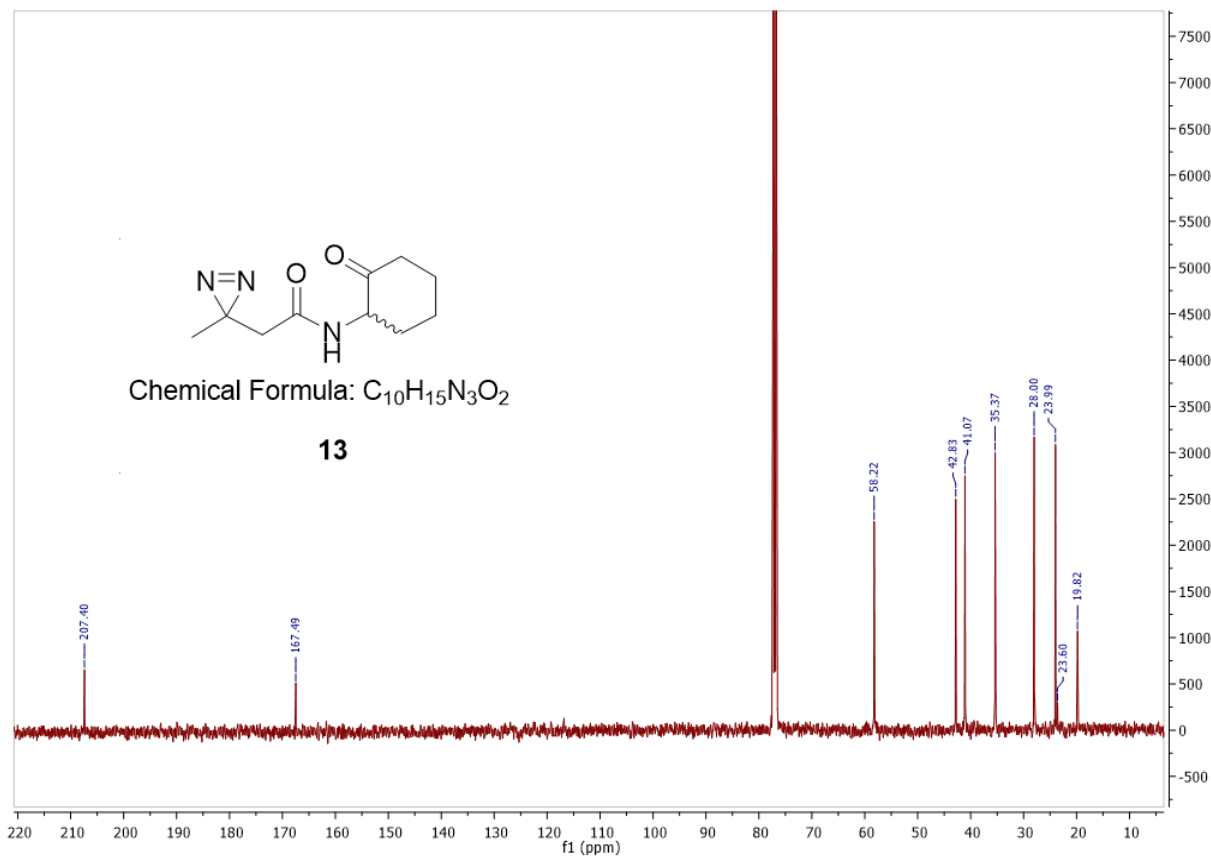

Figure S25.  $^1\text{H}$  NMR (upper spectrum) and  $^{13}\text{C}$  NMR (lower spectrum) of **13**.

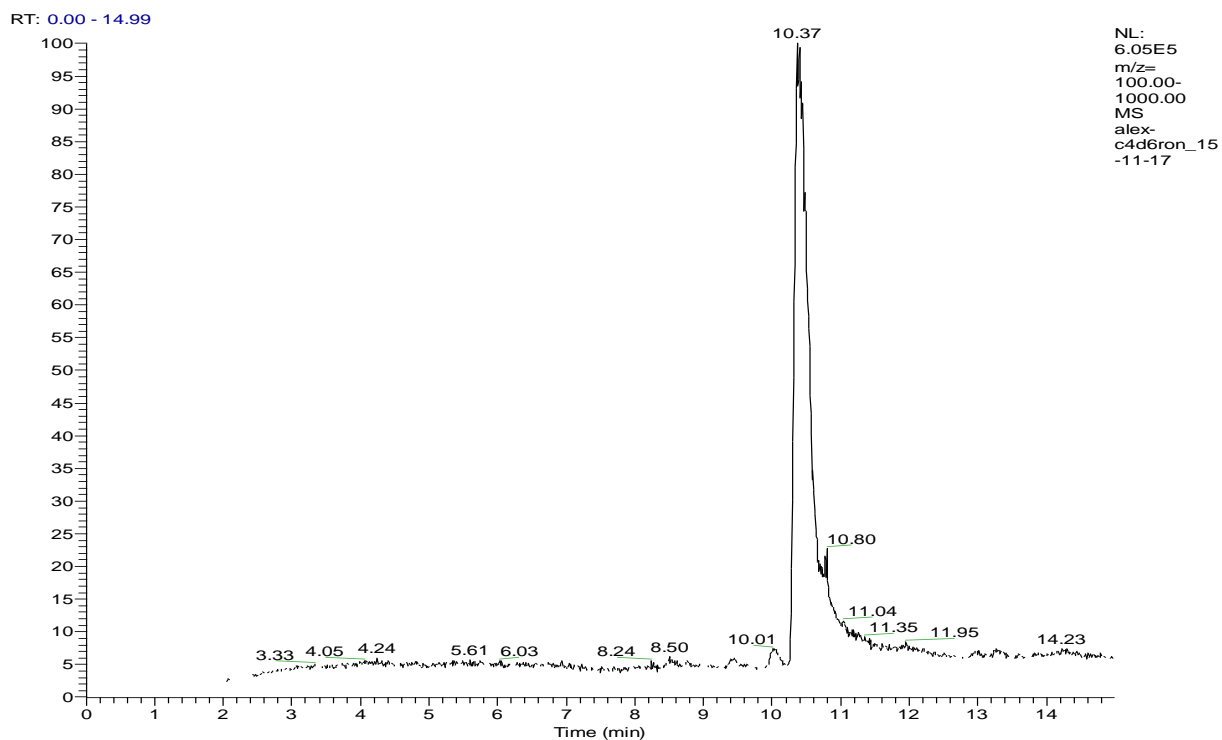

alex-c4d6ron\_15-11-17 #655 RT: 10.40 AV: 1 NL: 4.00E5  
T: ITMS + c ESI Full ms [100.00-1000.00]

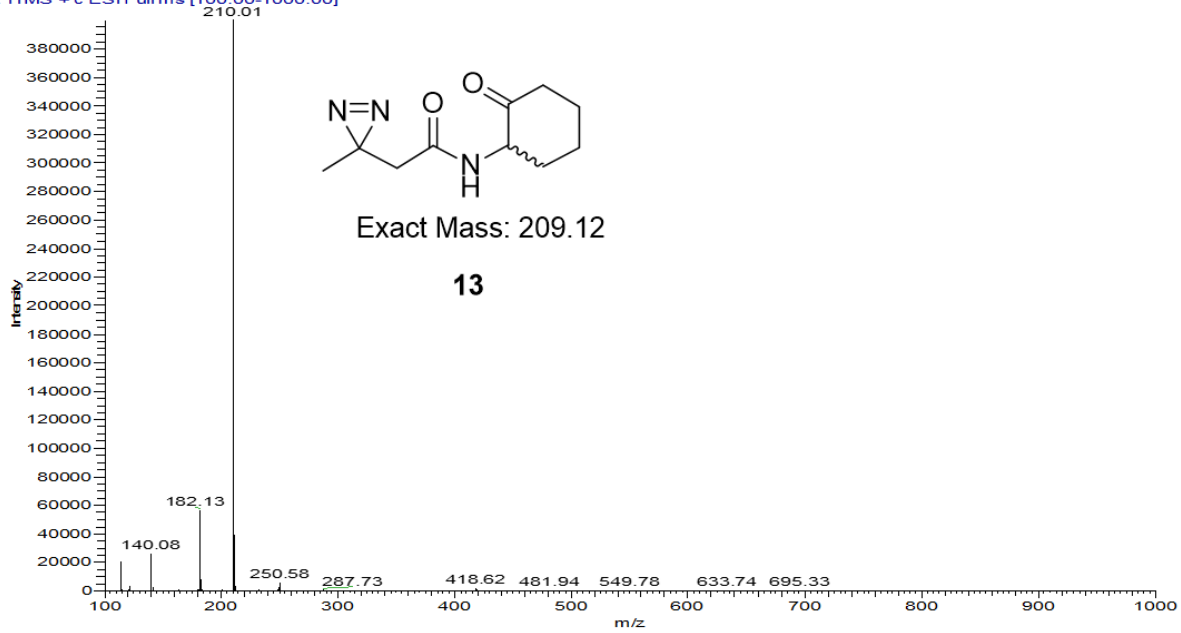

Figure S26. LC-MS of **13**.

## Synthesis of 14

To a 4 mL vial was added *N*-(2-hydroxycyclopentyl)-2-(3-methyl-3*H*-diazirin-3-yl) acetamide (**1**), (100 mg, 0.507 mmol) and dissolved in 1.6 mL of DCM. Dess-martin periodinane, (354 mg, 0.835 mmol) was added to the vial and the mixture was stirred with a magnet and left overnight. To a 100 mL flask was added 25 mL water and the reaction mixture, 50 mL of 10% NaHCO<sub>3</sub> and equal amount of DCM. The two phases were separated and the organic phase was dried over MgSO<sub>4</sub>. The solvent was removed by rotary evaporation and purified by column chromatography (EtOAc:Hexane, 50/50 v/v) to yield 2-(3-methyl-3*H*-diazirin-3-yl)-*N*-(2-oxocyclopentyl) acetamide (**14**) as a white solid (56.5 mg, 57%), (**Scheme S14**).

<sup>1</sup>H NMR (400 MHz, CDCl<sub>3</sub>): δ 6.04 (br s, 1H), 4.10-4.17 (m, 1H), 2.65-2.71 (m, 1H), 2.40-2.47 (m, 1H), 2.15-2.26 (app AB q, *J* = 17.6, 10 Hz, 3H), 2.05-2.13 (m, 1H), 1.82-1.95 (m, 1H), 1.56-1.67 (dq, *J* = 12.4, 6.8, Hz, 1H), 1.16 (s, 3H).

<sup>13</sup>C NMR (101 MHz, CDCl<sub>3</sub>): δ 214.96, 168.45, 58.29, 42.62, 35.00, 29.99, 23.81, 19.89, 18.20.

LC-MS *m/z* calculated for C<sub>9</sub>H<sub>13</sub>N<sub>3</sub>O<sub>2</sub> (M+H): 196.10. Found: 196.01.

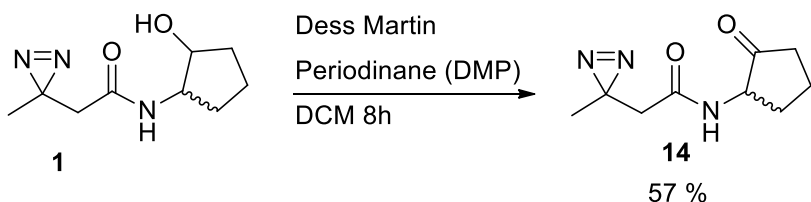

**Scheme S14.** Synthesis of **14**.

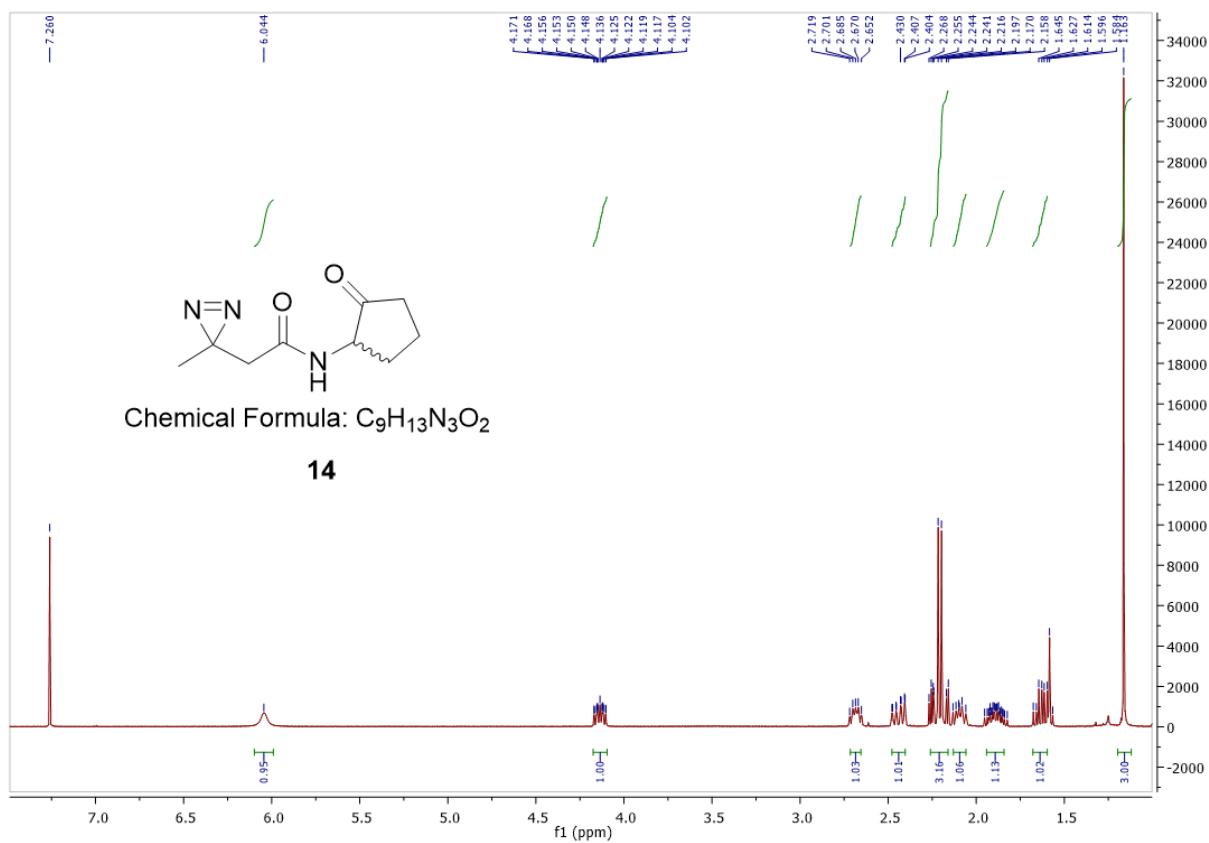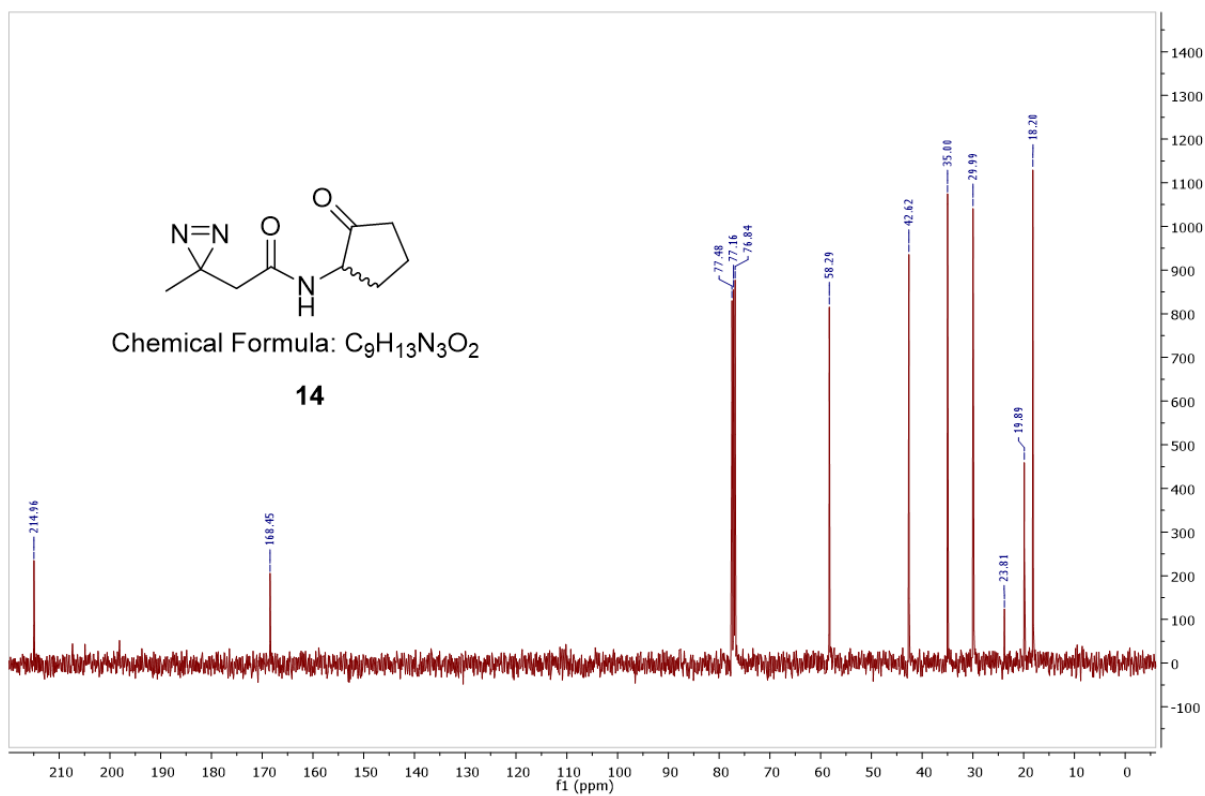

Figure S27.  $^1H$  NMR (upper spectrum) and  $^{13}C$  NMR (lower spectrum) of **14**.

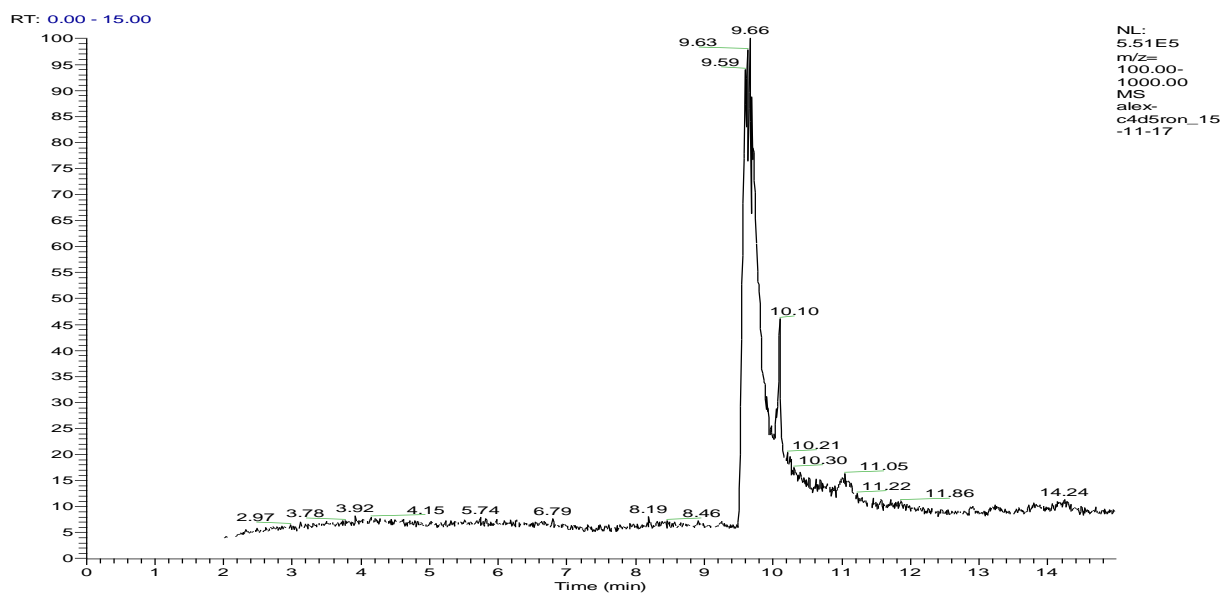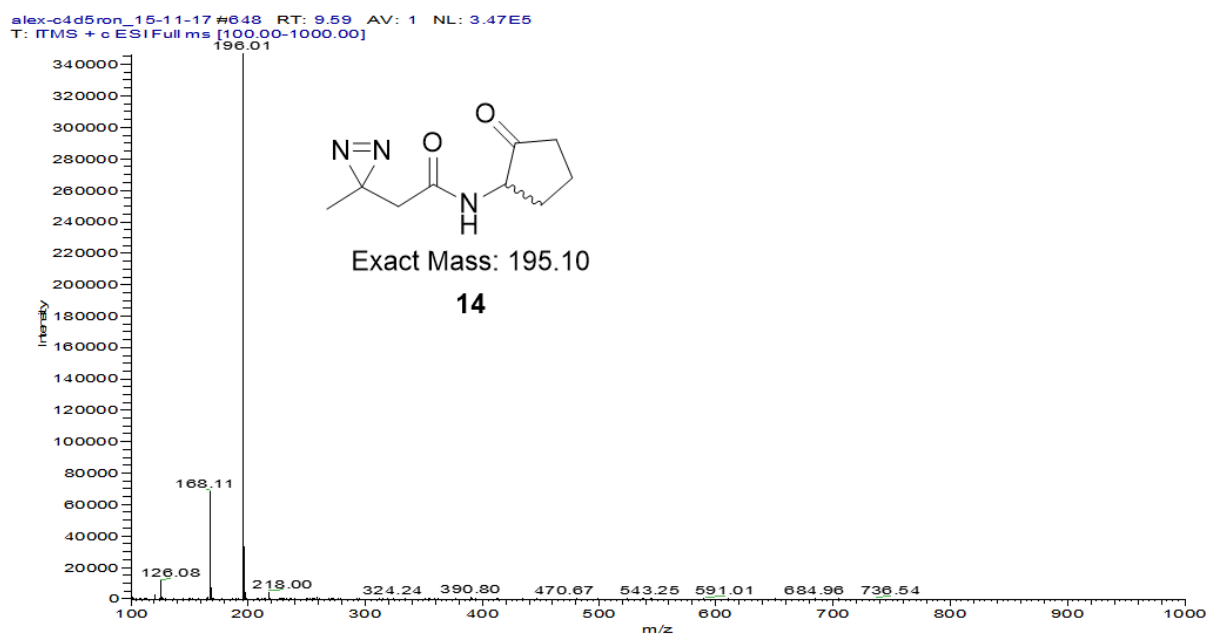

Figure S28. LC-MS of **14**.

Biological evaluation

Activation assays – Luminescent Reporter Strain PAO-JP2 (pKD-*rhIA*)

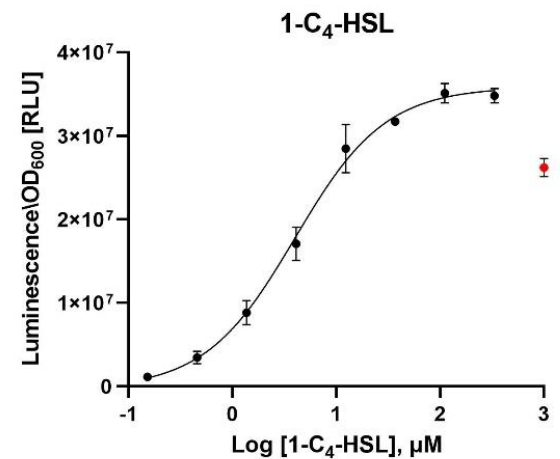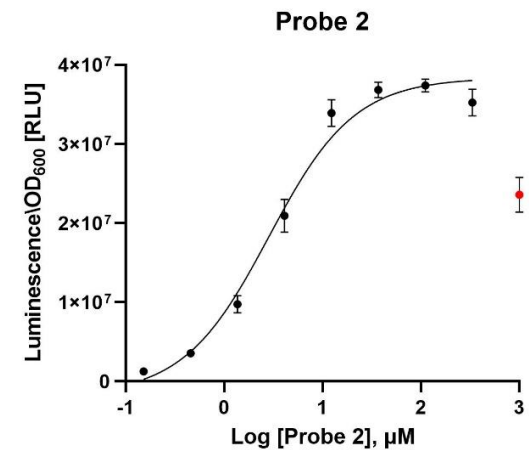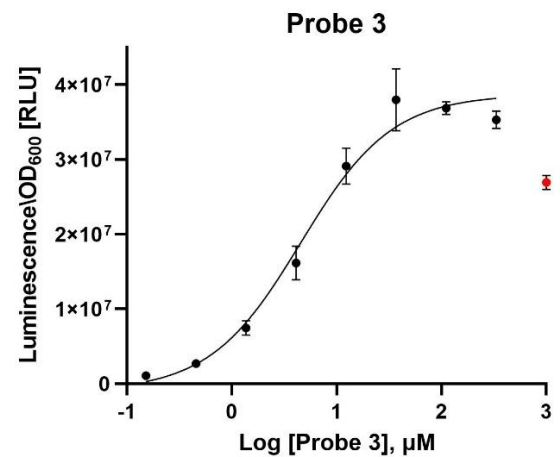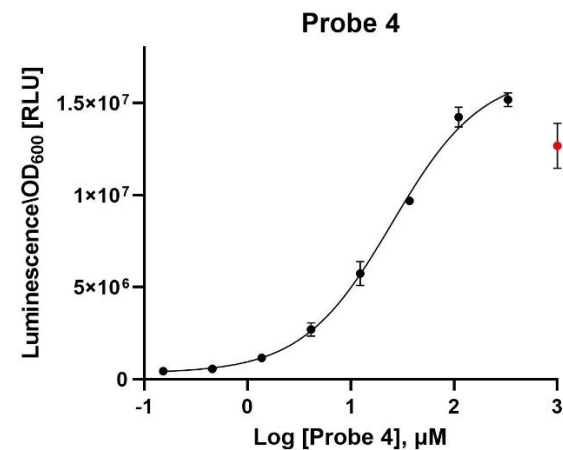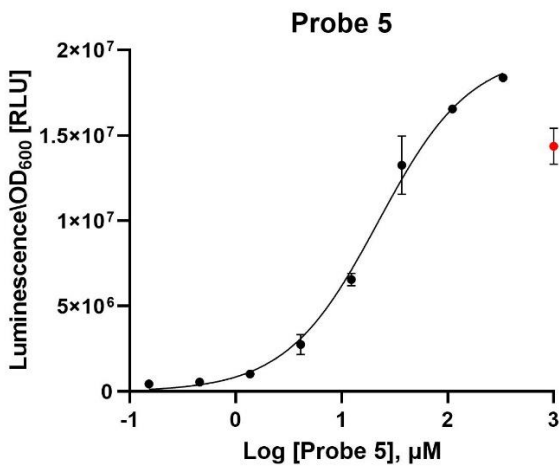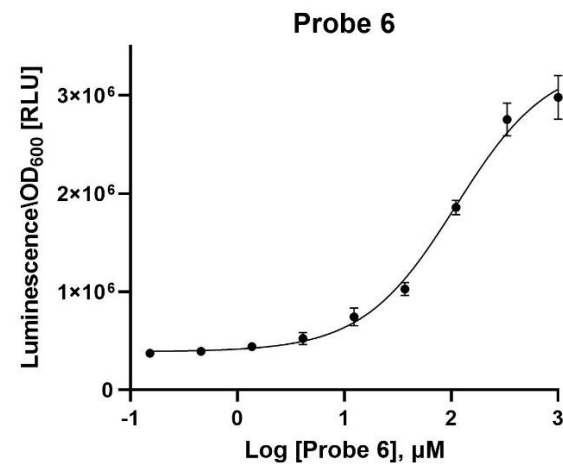

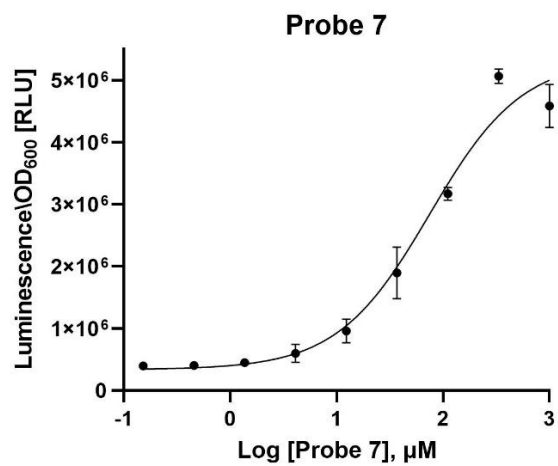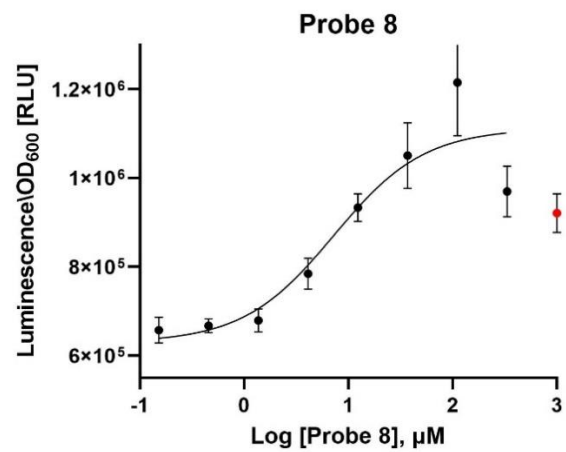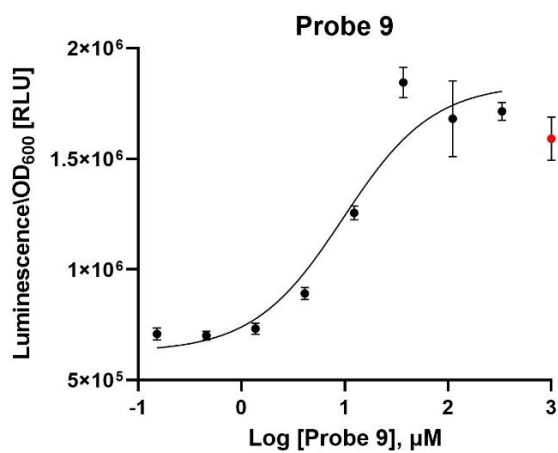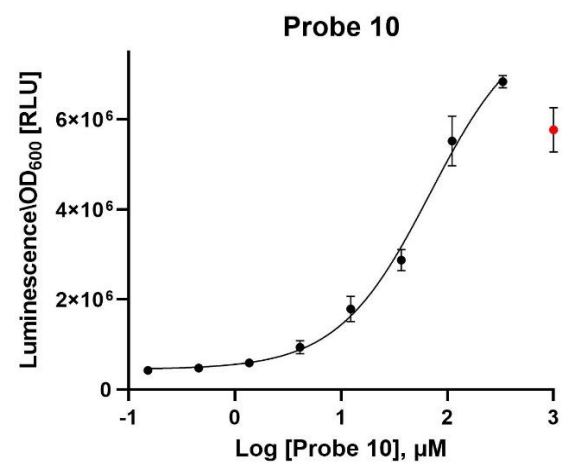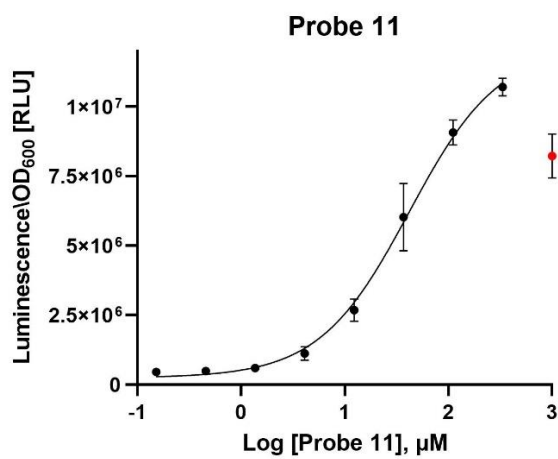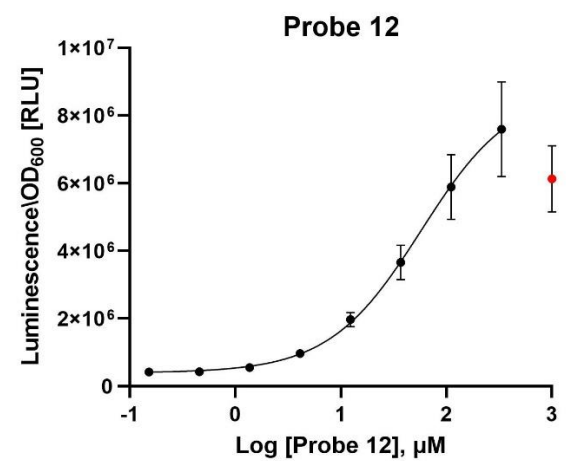

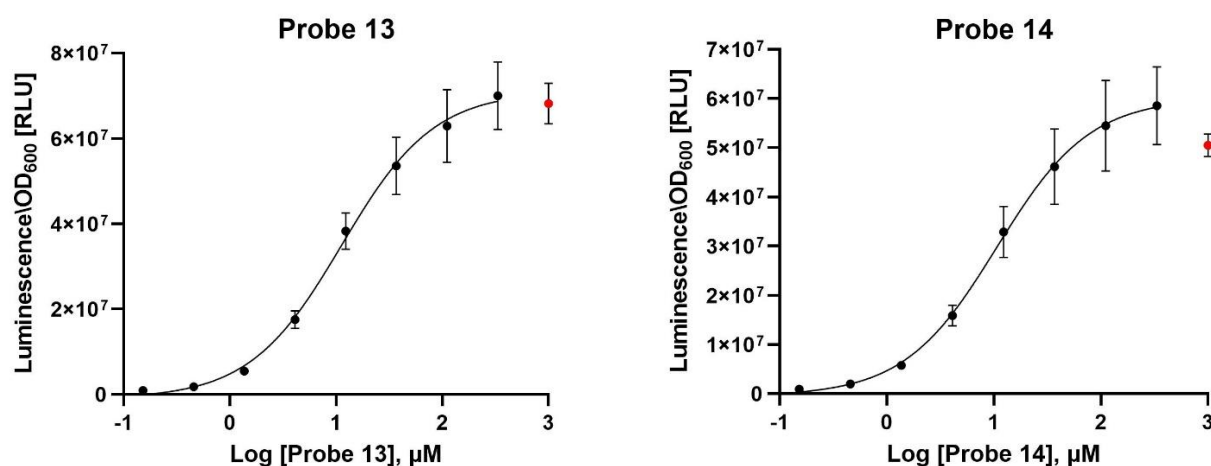

**Figure S29.** Activation assays showing the concentration-dependent, luminescence/OD<sub>600</sub> Rhl QS system activation in *P. aeruginosa* PAO-JP2 (pKD-*rhlA*) reporter strain by the different synthesized probes. All compounds were tested in triplicates and data represent the average  $\pm$  SD of three independent experiments per probe. Values for the highest concentrations were excluded from the curve fitting process for all compounds, since for most compounds 1 mM of probe resulted in lower activation of the Rhl system, most likely caused by membrane perturbation. Three parameter fits were used to calculate EC<sub>50</sub> values.



Growth assays (OD<sub>600</sub>) - *P. aeruginosa* PAO-JP2 (pKD-rhIA)

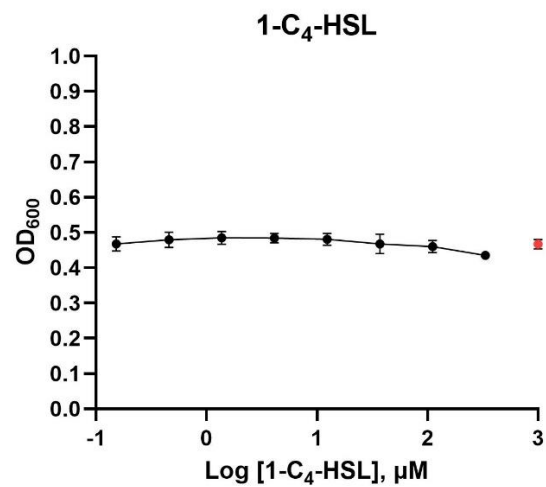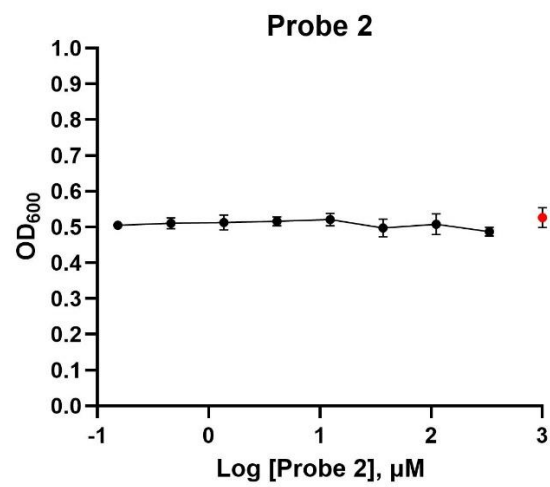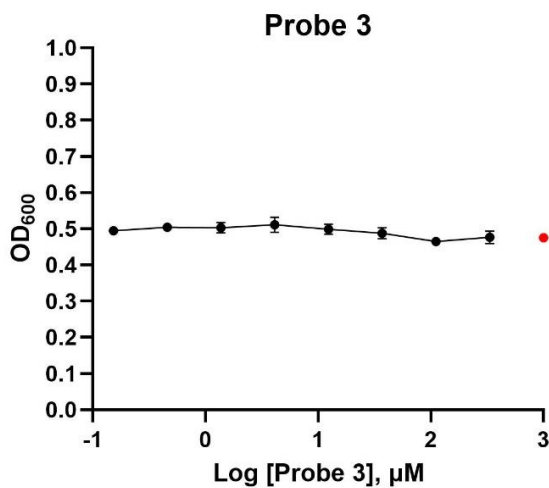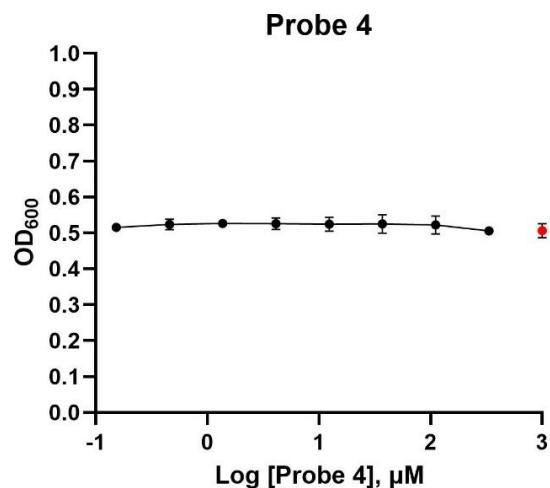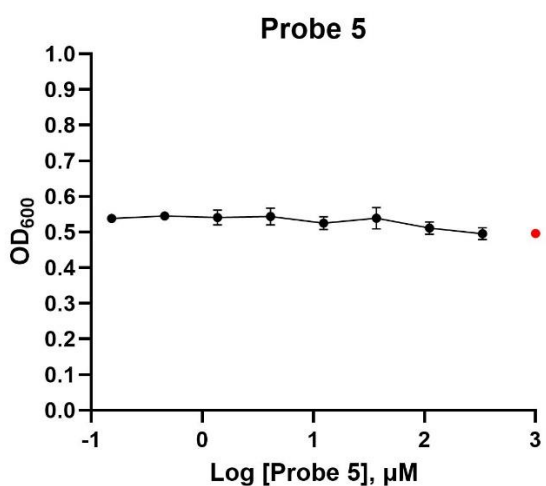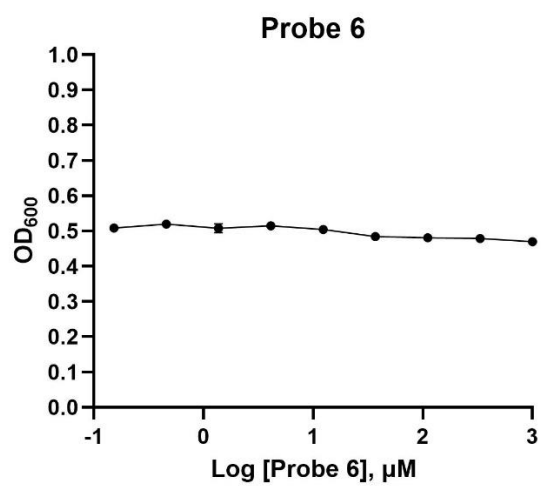

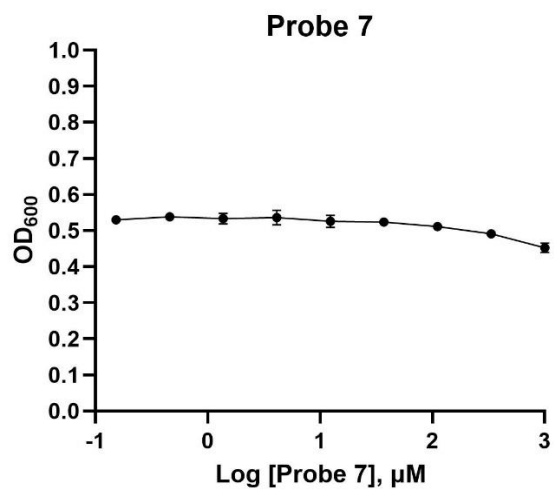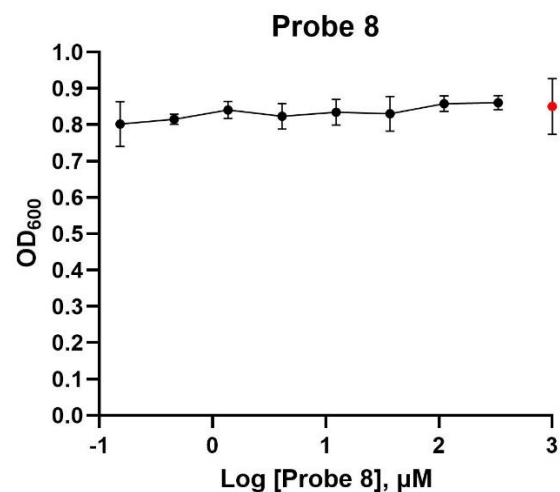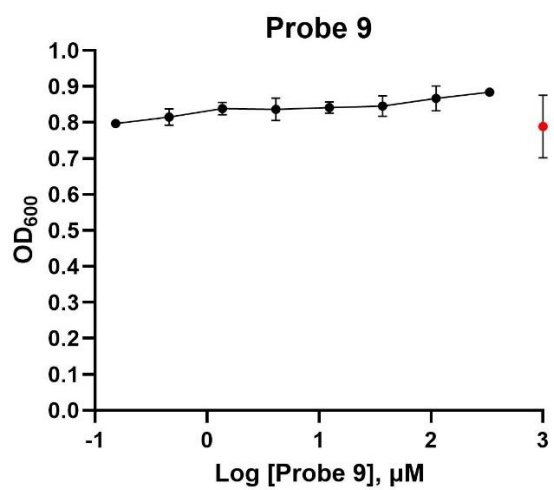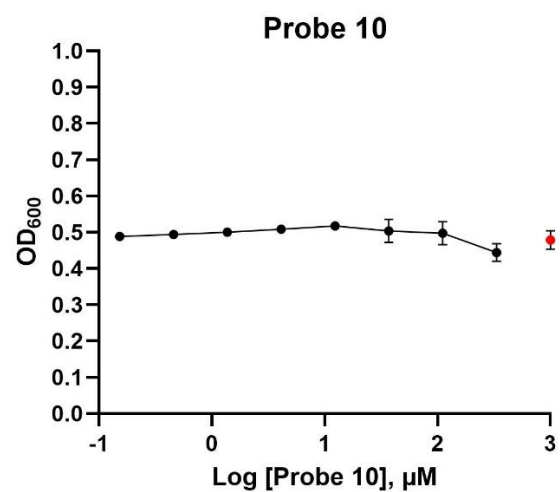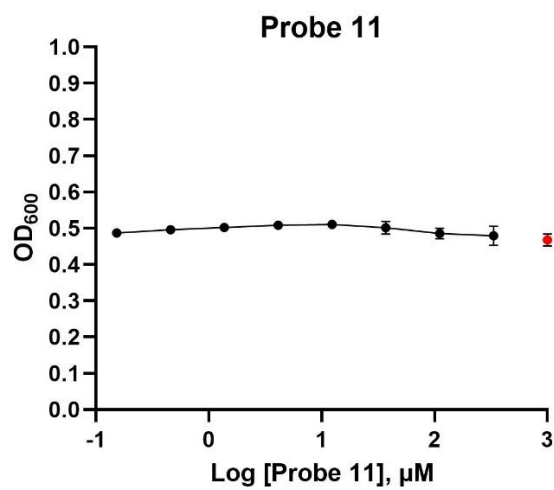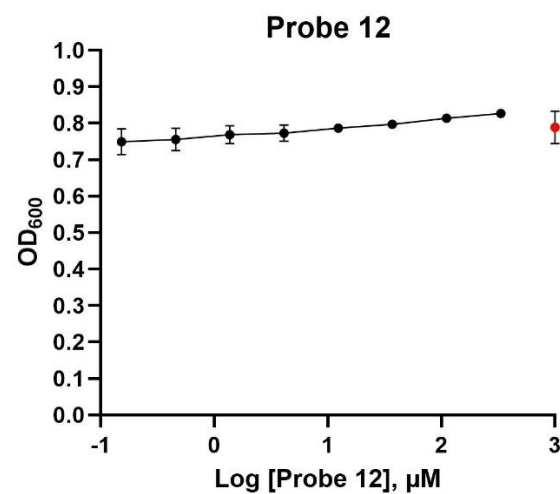

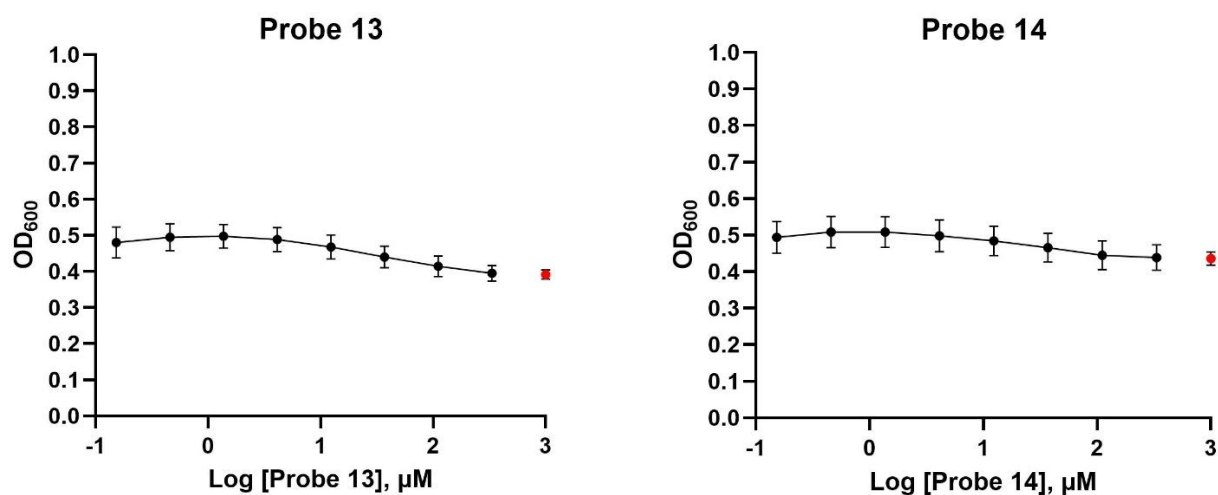

**Figure S30.** Concentration-dependent growth (OD<sub>600</sub>) data for the different probes in *P. aeruginosa* PAO-JP2 (pKD-*rhlA*) reporter strain. All compounds were tested in triplicates and data represent the average  $\pm$  SD of three independent experiments per probe. Values for the highest concentrations were excluded from the curve fitting process for all compounds, since for most compounds 1 mM of probe resulted in lower activation of the Rhl system, most likely caused by membrane perturbation.

**Final activation assays for compounds 12-14 (Luminescence/OD<sub>600</sub>) - *P. aeruginosa* PAO-JP2 (pKD-*rhlA*)**

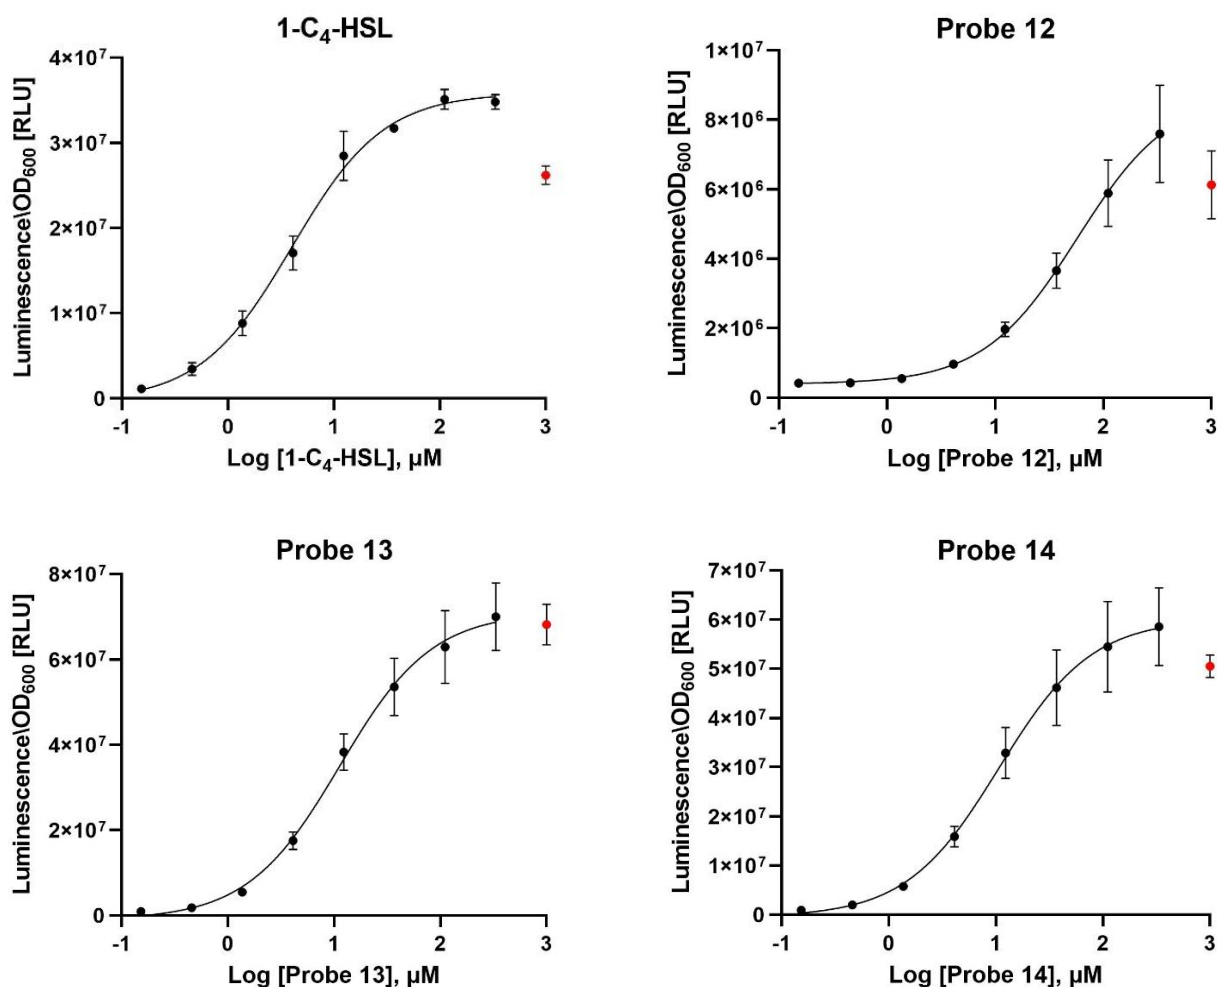

**Figure S31.** Final concentration-dependent luminescence/OD<sub>600</sub> results for the synthetically optimized probes as shown in fig. 3 in the article manuscript. All compounds were tested in triplicates and data represent the average  $\pm$  SD of three independent experiments per probe. Values for the highest concentrations were excluded from the curve fitting process for all compounds, since for most compounds 1 mM of probe resulted in lower activation of the Rhl system, most likely caused by membrane perturbation. Three parameter fits were used to calculate EC<sub>50</sub> values (Table 1 in the article manuscript).

**Luminescence/OD<sub>600</sub> values at 75% activation for each probe compared to C<sub>4</sub>-HSL**

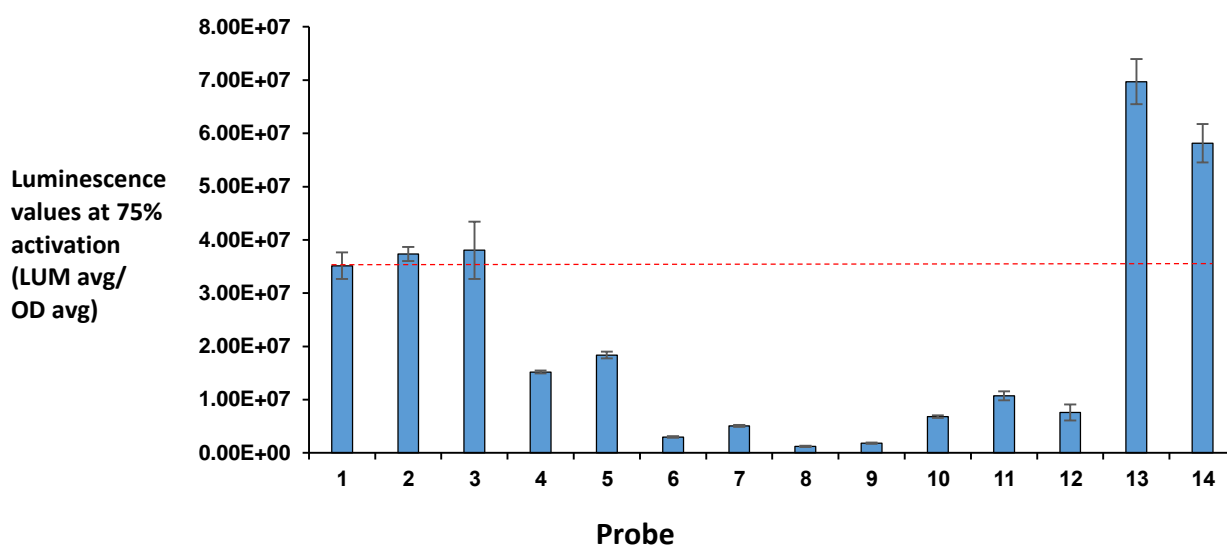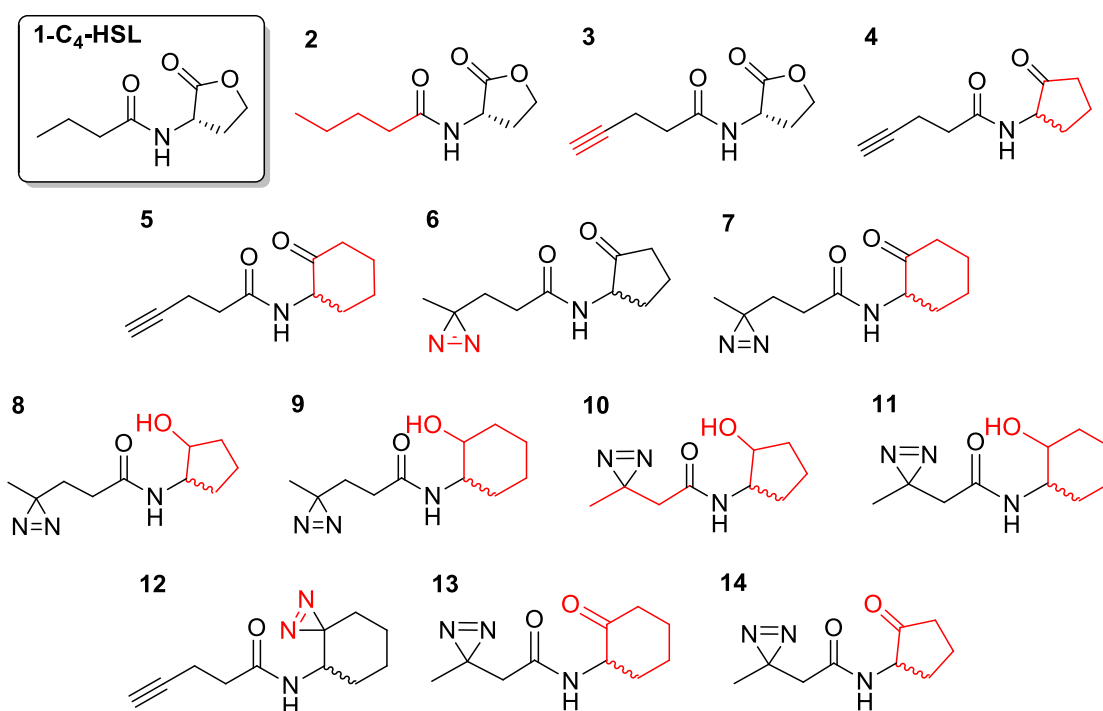

**Figure S32.** Structure-activity relationship results for the activation of the Rhl QS system in *P. aeruginosa* PAO-JP2 (pKD-*rhlA*) by the different probes compared to the activation of the natural autoinducer C<sub>4</sub>-HSL. All compounds were tested in triplicates and data represent the average  $\pm$  SD of three independent experiments per probe.

## Coomassie images of probes 12 and 13 fluorophore labeling

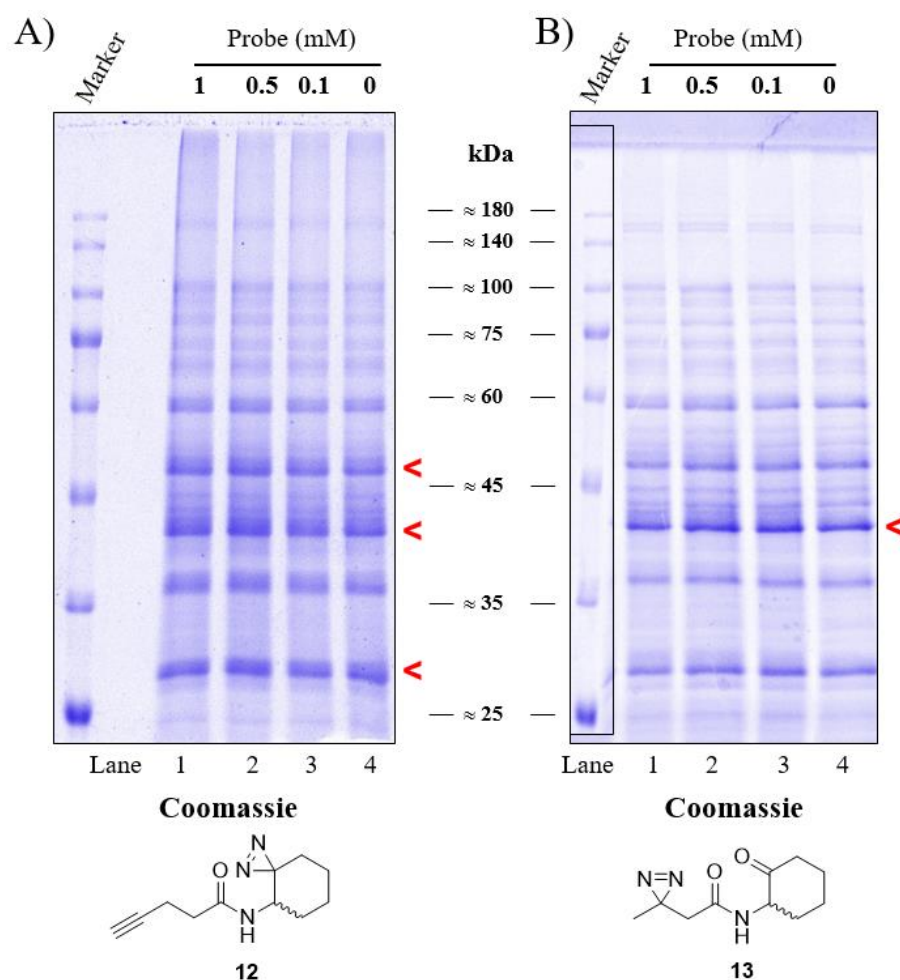

**Figure S33. (A)** In situ Coomassie gel images in the presence (lane 1-3) or absence (lane 4) of probe **12** in *P. aeruginosa* PAO-JP2 (pKD-rhIA). A full SDS-PAGE separation is shown,  $\approx 29, 42, 50$  kDa regions are marked in arrows indicating probe labeling. **(B)** In situ Coomassie gel images in the presence (lane 1-3) or absence (lane 4) of probe **13** in *P. aeruginosa* PAO-JP2 (pKD-rhIA). Marker bands in image B are copied from the same gel.

## Strain activity comparison

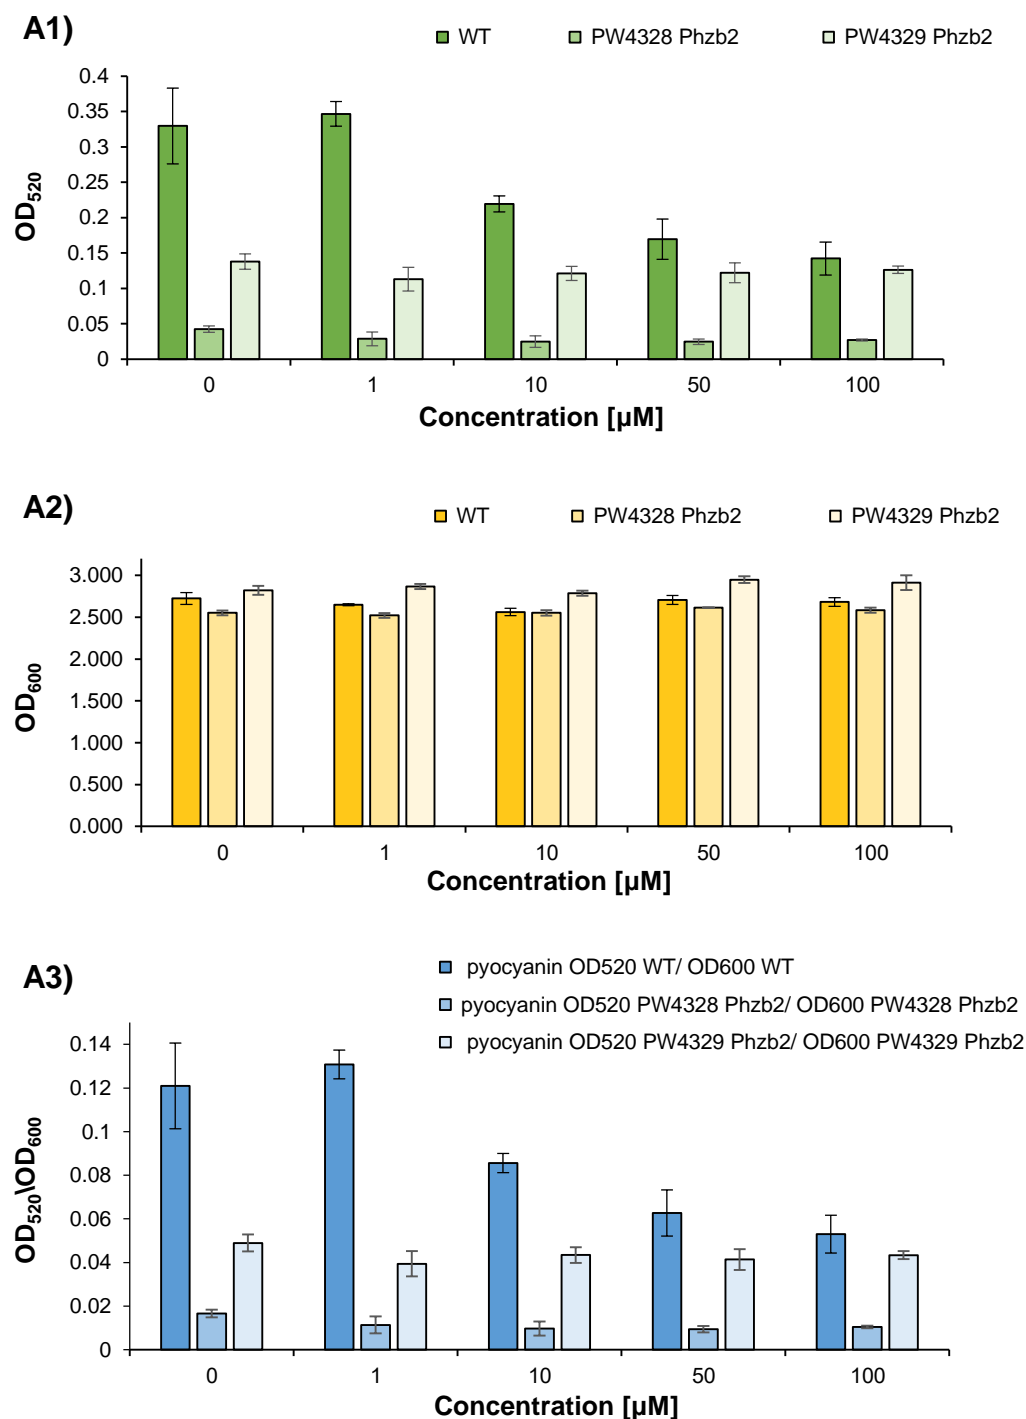

**Figure S34.** Activity comparison towards C<sub>4</sub>-HSL increasing concentration. **(A1)** Pyocyanin production by wild-type *P. aeruginosa* strain PAO1, transposon mutants PW4328 (PhzB2), and PW4329 (PhzB2). **(A2)** Growth response for wild-type *P. aeruginosa* strain PAO1, PW4328 (PhzB2), and PW4329 (PhzB2). **(A3)** OD<sub>520</sub>/OD<sub>600</sub> for wild-type *P. aeruginosa* strain PAO1, PW4328 (PhzB2), and PW4329 (PhzB2). All bacteria were tested in triplicates and data represent the average ± SD of three independent experiments.

## Purification of His<sub>6</sub>-TEV-PhzB1

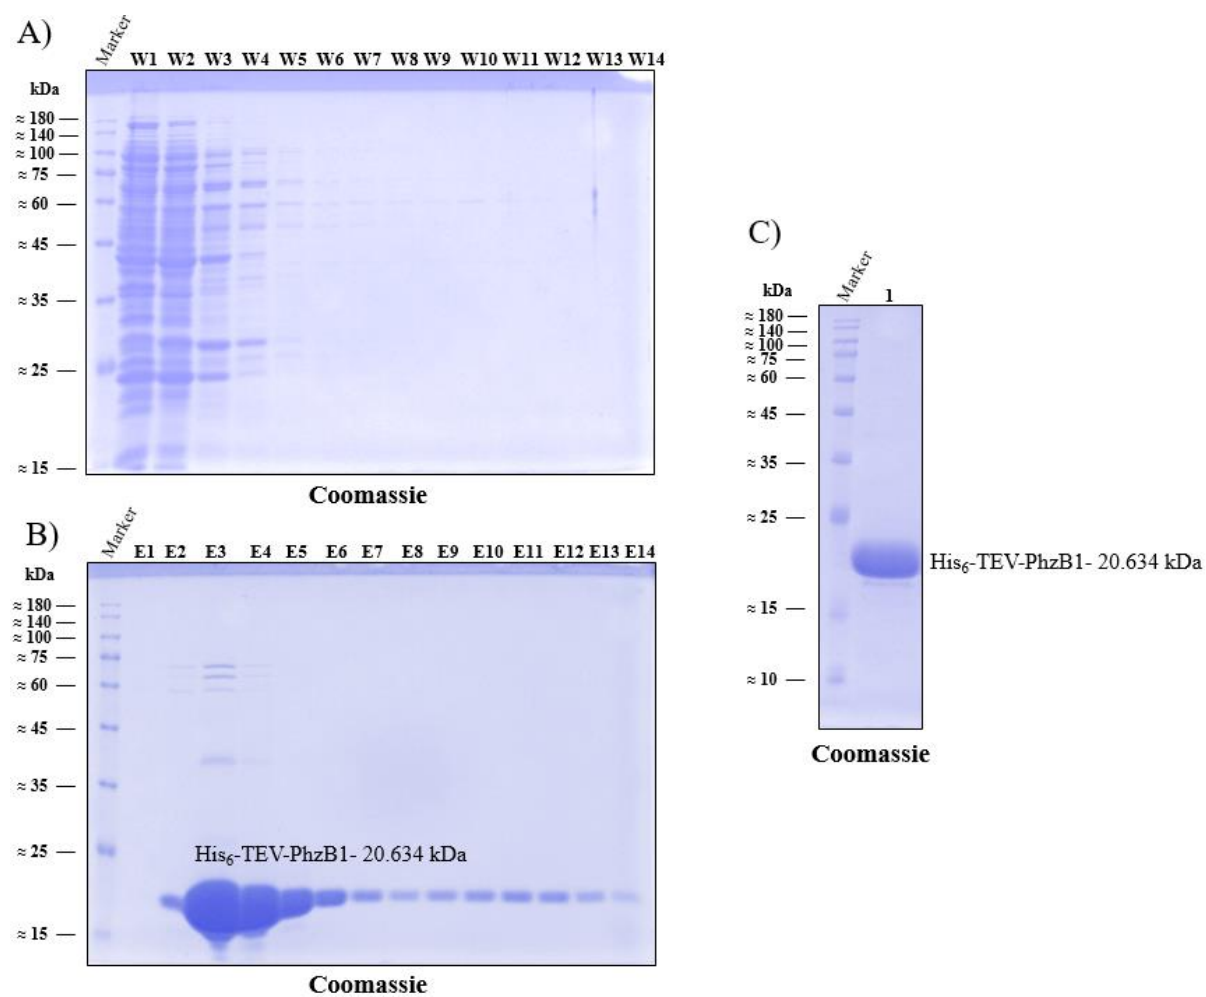

**Figure S35.** **(A)** Coomassie image of the washed (W1-W14) proteins. **(B)** The His<sub>6</sub>-TEV tagged protein that was retained on the Ni-NTA beads and eluted with elution buffer (E1-E14). The molecular mass of His<sub>6</sub>-TEV-PhzB1 predicted based on the DNA sequence and corresponds to 20,634 kDa. **(C)** His<sub>6</sub>-TEV-PhzB1 after overnight dialysis at 4°C.



## Concentration-dependent His<sub>6</sub>-TEV-PhzB1 labeling

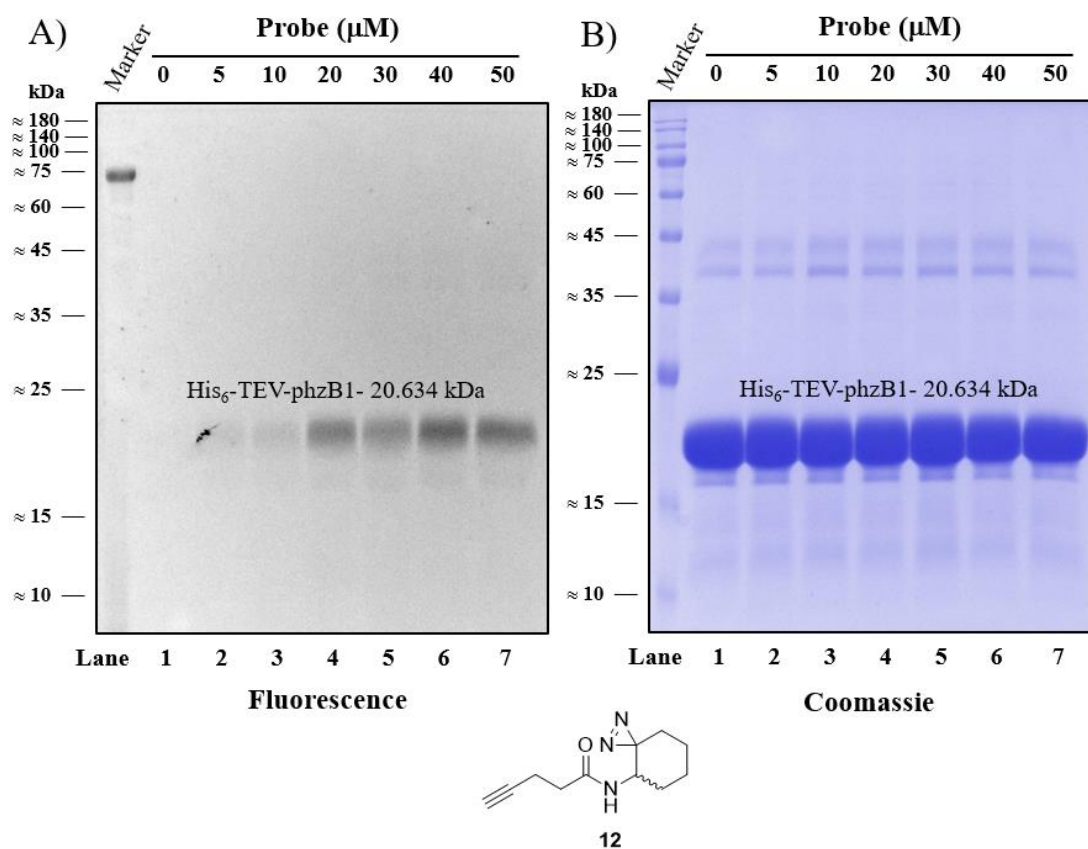

**Figure S36. (A)** The fluorescent image of His<sub>6</sub>-TEV-PhzB1 concentration-dependent labeling (≈20 kDa). The figure shows the increase in labeling as the concentration of probe **12** increases from 0-50 μM. **(B)** The Coomassie image of the labeled protein.

## The specificity of labeling toward His<sub>6</sub>-TEV-PhzB1

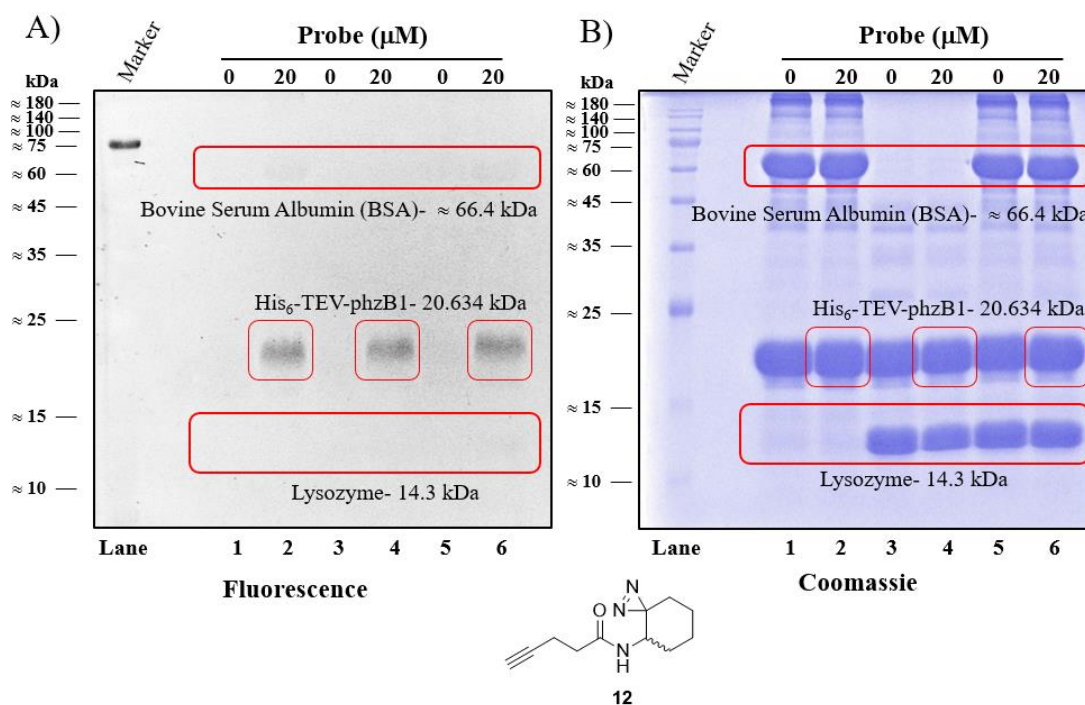

**Figure S37. (A)** Fluorescent image of the specific labeling of His<sub>6</sub>-TEV-PhzB1 protein (≈20 kDa) by probe **12** compared to the control proteins, BSA (≈60-62 kDa), and Lysozyme (≈14 kDa). The specificity towards the His<sub>6</sub>-TEV-PhzB1 protein can be seen in lanes 2, 4 and 6. Lanes 1, 3, and 5 served as a negative control. **(B)** The Coomassie image of the proteins.

## C<sub>4</sub>-HSL concentration-dependent competitive labeling of His<sub>6</sub>-TEV-PhzB1

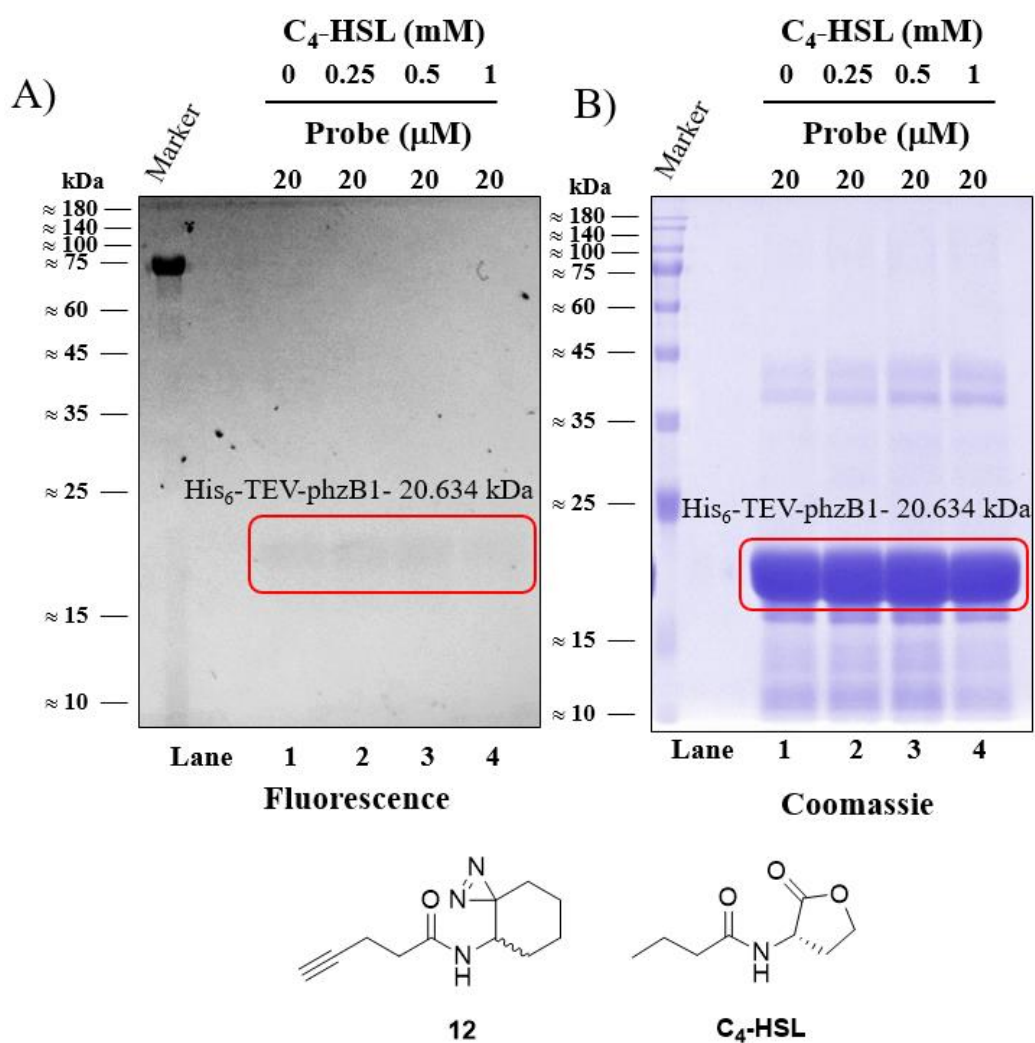

**Figure S38.** Repeat experiment of competitive labeling of the purified His<sub>6</sub>-TEV-PhzB1 **(A)** Competitive labeling of His<sub>6</sub>-TEV-PhzB1 with constant probe **12** concentration of 20 μM and increasing concentrations of C<sub>4</sub>-HSL of 0-1000 μM. **(B)** The corresponding Coomassie gel image.

## Phenazine biosynthetic pathway

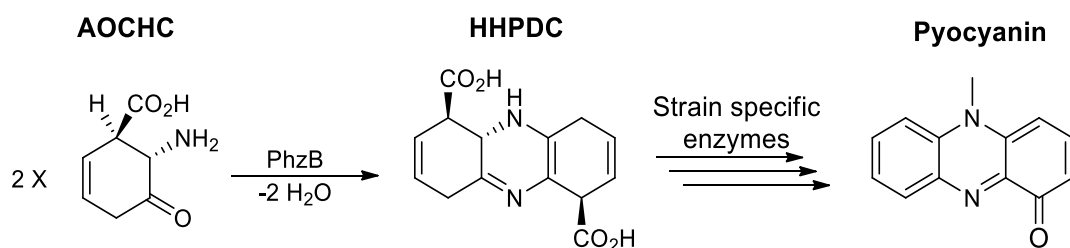

**Figure S39.** The role of PhzB in the biosynthetic pathway of strain-specific phenazines. Modified from N. Guttenberger et al.<sup>1</sup> and Blankenfeldt and Parsons.<sup>2</sup> The effect of C<sub>4</sub>-HSL as a direct inhibitor of PhzB in the synthesis of hexahydrophenazine-1,6-dicarboxylic acid (HHPDC) from 6-amino-5-oxocyclohex-2-ene-1-carboxylic acid (AOCHC) is currently examined in more details.

## Supplemental References

1. N. Guttenberger, W. Blankenfeldt and R. Breinbauer, *Bioorg. Med. Chem.*, 2017, **25**, 6149-6166.
2. W. Blankenfeldt, J.F. Parsons, *Curr. Opin. Struct. Biol.*, 2014, **29**, 26-33.
