# Supplementary material for: Short-chain reactive probes as tools to unravel the Pseudomonas aeruginosa quorum sensing regulon
Source: Royal Society of Chemistry journal article supplement (doi:10.1039/d0sc04444j), 2021-01-01
Supplement: d0sc04444j2.zip [file Competitive labeling of His6-TEV-PhzB1.xlsx]

## Sheet: Key
Competitive labeling of His6-TEV-PhzB1	Quantification of competitive SDS-PAGE labeling of His6-TEV-PhzB1
Experimental methods	Proteins were incubated in the presence of C4-HSL and probe 12, labeled, analyzed by SDS-PAGE, and band intensities were calculated using ImageJ
Excel sheets content
His6-TEV-PhzB1 labeling	SDS-PAGE ImageJ quantified results of the competitive labeling of His6-TEV-PhzB1 for two labeling experiments
Abbreviations	TEV=Tobacco Etch Virus

## Sheet: His6-TEV-PhzB1 labeling
	Experiment 1							Experiment 2
			Area							Area
		[μM]							[μM]
	1	0	16808.9					1	0	22640.9
	2	250	15018.6					2	250	13416.4
	3	500	12074.7					3	500	9898.68
	4	1000	8358.87					4	1000	4107.52
	Average		Area
		[μM]		Stdeva
	1	0	19724.9	4123.85
	2	250	14217.5	1132.93
	3	500	10986.7	1538.67
	4	1000	6233.2	3006.16
