# Supplementary material for: Short-chain reactive probes as tools to unravel the Pseudomonas aeruginosa quorum sensing regulon
Source: Royal Society of Chemistry journal article supplement (doi:10.1039/d0sc04444j), 2021-01-01
Supplement: d0sc04444j2.zip [file Experiment 1.xlsx]

## Sheet: Key
Experiment 1	Chemical proteomics with Probe 12: Identification of proteins after incubation and photoaffinity labeling with Probe 12 in wild-type P. aeruginosa strain PAO1
Experimental methods	Yellow, Green and Blue sheets are independent biological replicates: Bacteria were grown, harvested, lysed, the lysates were incubated with C4HSL/Probe 12 in triplicates and labeled, downstream processed, streptavidin affinity enriched and trypticaly digested on the same day. StageTips desalting was done on the next day and LC-MS/MS analysis was performed later
Excel sheets content
1-1 proteinGroups C4HSL-1	Experiment 1 repeat 1 Raw data results of C4HSL control labeling
1-1 proteinGroups Probe 12	Experiment 1 repeat 1 Raw data results of Probe 12 labeling
1-1 Sheet1	Experiment 1 repeat 1: C4HSL results and unique Probe 12 results (C4HSL hits are subtracted)
1-1 Sheet2	Experiment 1 repeat 1: Filtered data of proteins for Probe 12 labeling which retain razor+unique peptides requirement of >1 for each replicate (filled with green)
For Green and Blue sheets-same as above only repeat experiment number changes (1-2, 1-3)

## Sheet: 1-1 proteinGroups C4HSL-1
Protein IDs	Majority protein IDs	Peptide counts (all)	Peptide counts (razor+unique)	Peptide counts (unique)	Fasta headers	Number of proteins	Peptides	Razor + unique peptides	Unique peptides	Sequence coverage [%]	Unique + razor sequencecoverage [%]	Unique sequencecoverage [%]	Mol. weight [kDa]	Sequence length	Sequence lengths	Q-value	Score	Intensity	MS/MS Count	Only identified by site	Reverse	Potential contaminant	id	Peptide IDs	Peptide is razor	Mod. peptide IDs	Evidence IDs	MS/MS IDs	Best MS/MS	Oxidation (M) site IDs	Oxidation (M) site positions
CON__P00761	CON__P00761	4	4	4	>P00761 SWISS-PROT:P00761|TRYP_PIG Trypsin - Sus scrofa (Pig).	1	4	4	4	25.1	25.1	25.1	24.409	231	231	0	32.838	5911400000	24			+	0	341;436;491;708	True;True;True;True	360;361;459;517;750	579;580;581;582;583;584;585;739;837;1276;1277	720;721;722;723;724;725;726;727;728;729;730;731;732;733;734;735;736;737;921;1043;1620;1621;1622;1623;1624;1625	727;921;1043;1624	0	94
CON__P02533;CON__Q6IFX2;CON__Q04695;CON__Q9QWL7;CON__P19012;CON__A2A4G1;CON__P08727;CON__P19001;CON__Q61782;CON__P05784;CON__P35900;CON__Q9D312;CON__Q8N1A0;CON__Q14525;CON__Q9UE12;CON__Q15323;CON__A2A5Y0;CON__Q92764;CON__Q14532;CON__A2AB72;CON__Q497I4;CON__O76015;CON__O76013;CON__Q7Z3Y9;CON__O76014;CON__REFSEQ:XP_986630	CON__P02533;CON__Q6IFX2	16;9;7;7;6;6;5;4;3;2;2;2;1;1;1;1;1;1;1;1;1;1;1;1;1;1	7;4;1;2;0;0;1;0;1;0;0;0;0;0;0;0;0;0;0;0;0;0;0;0;0;0	7;4;1;2;0;0;1;0;1;0;0;0;0;0;0;0;0;0;0;0;0;0;0;0;0;0	>P02533 SWISS-PROT:P02533 Tax_Id=9606 Gene_Symbol=KRT14 Keratin, type I cytoskeletal 14;>Q6IFX2 SWISS-PROT:Q6IFX2 Tax_Id=10090 Gene_Symbol=Krt42 Keratin, type I cytoskeletal 42	26	16	7	7	36.9	21.4	21.4	51.621	472	472;452;432;433;456;456;400;403;93;423;424;431;295;404;416;416;416;425;448;453;455;456;467;468;471;476	0	86.273	55628000	13			+	1	62;86;99;119;194;279;370;398;414;428;455;527;667;687;751;789	False;True;False;True;True;True;False;False;False;False;True;True;True;False;False;False	63;87;101;123;208;295;392;421;437;451;479;557;707;727;795;833	104;105;143;144;168;169;208;209;348;349;484;636;682;683;708;727;728;778;893;1205;1240;1351;1352;1417;1418;1419	133;134;135;185;186;217;218;219;220;221;272;273;274;446;447;611;795;847;848;849;850;887;908;909;970;971;1109;1110;1534;1581;1708;1709;1710;1711;1792;1793;1794;1795;1796;1797;1798;1799	135;186;219;272;447;611;795;848;887;908;970;1110;1534;1581;1710;1793	1;2;3	119;212;272
CON__P02538;CON__P05787;CON__Q8VED5;CON__H-INV:HIT000016045;CON__H-INV:HIT000292931	CON__P02538	14;4;4;2;1	8;1;0;0;1	2;0;0;0;0	>P02538 SWISS-PROT:P02538 Tax_Id=9606 Gene_Symbol=KRT6A Keratin, type II cytoskeletal 6A	5	14	8	2	24.8	16.1	3.5	60.044	564	564;483;531;99;443	0	55.374	77851000	13			+	2	18;52;92;199;203;272;410;551;555;557;618;652;810;819	True;True;False;True;False;True;False;True;False;False;True;True;True;False	18;53;93;213;217;288;433;585;589;591;657;692;854;863	28;29;86;87;154;155;355;360;361;474;702;977;978;989;990;991;992;996;997;1106;1181;1182;1451;1452;1471	36;37;112;113;114;198;199;200;201;202;453;458;459;601;878;1239;1240;1253;1254;1255;1256;1257;1258;1259;1260;1264;1265;1403;1504;1505;1836;1837;1869	36;113;199;453;459;601;878;1240;1254;1264;1403;1505;1836;1869	4;5	242;452
CON__P04264	CON__P04264	24	24	15	>P04264 SWISS-PROT:P04264 Tax_Id=9606 Gene_Symbol=KRT1 Keratin, type II cytoskeletal 1	1	24	24	15	36.5	36.5	23.9	66.017	644	644	0	323.31	3987400000	108			+	3	21;155;163;218;254;316;396;409;466;488;552;555;563;594;620;626;629;634;673;677;678;805;819;820	True;True;True;True;True;True;True;True;True;True;True;True;True;True;True;True;True;True;True;True;True;True;True;True	21;162;163;172;173;233;270;332;419;432;492;514;586;589;598;599;600;632;659;665;668;673;713;717;718;849;863;864	34;35;268;269;270;271;283;284;285;286;386;387;443;444;445;538;539;680;700;701;796;797;798;832;833;979;980;981;982;989;990;991;992;1009;1010;1011;1012;1013;1014;1064;1065;1109;1110;1116;1117;1122;1123;1131;1215;1216;1223;1224;1225;1226;1227;1228;1445;1446;1471;1472;1473	44;45;46;47;344;345;346;347;348;349;364;365;366;367;368;369;370;371;372;488;489;490;491;492;556;557;558;559;560;668;669;670;671;672;845;874;875;876;877;992;993;994;995;996;1038;1039;1241;1242;1243;1244;1253;1254;1255;1256;1257;1258;1259;1260;1277;1278;1279;1280;1281;1282;1283;1284;1285;1345;1346;1406;1407;1408;1409;1415;1416;1421;1422;1423;1424;1425;1435;1436;1547;1548;1549;1550;1551;1552;1560;15…	44;347;365;490;559;671;845;874;993;1039;1243;1254;1284;1345;1406;1416;1422;1435;1548;1561;1567;1828;1869;1874	6;7;8;9	259;262;296;469
CON__P08779;CON__Q9Z2K1;CON__Q3ZAW8	CON__P08779;CON__Q9Z2K1;CON__Q3ZAW8	18;9;9	15;7;7	9;3;3	>P08779 SWISS-PROT:P08779 Tax_Id=9606 Gene_Symbol=KRT16 Keratin, type I cytoskeletal 16;>Q9Z2K1 SWISS-PROT:Q9Z2K1 Tax_Id=10090 Gene_Symbol=Krt16 Keratin, type I cytoskeletal 16;>Q3ZAW8 TREMBL:Q3ZAW8;Q9EQD6;Q9EQD7 Tax_Id=10090 Gene_Symbol=Krt16 Keratin inte	3	18	15	9	37.6	32.8	22.2	51.267	473	473;469;474	0	144.07	224110000	29			+	4	62;85;99;120;148;193;278;336;370;398;414;428;549;666;687;751;789;823	True;True;True;True;True;True;True;True;True;False;False;True;True;True;True;True;False;True	63;86;101;124;154;207;294;355;392;421;437;451;583;706;727;795;833;867	104;105;141;142;168;169;210;211;258;346;347;482;483;571;636;682;683;708;727;728;973;974;1203;1204;1240;1351;1352;1417;1418;1419;1478	133;134;135;183;184;217;218;219;220;221;275;276;330;444;445;609;610;710;795;847;848;849;850;887;908;909;1235;1236;1532;1533;1581;1708;1709;1710;1711;1792;1793;1794;1795;1796;1797;1798;1799;1884	135;183;219;275;330;445;609;710;795;848;887;908;1235;1533;1581;1710;1793;1884	3;10;11	121;259;274
CON__P13645;CON__P02535-1;CON__Q148H6;CON__Q7Z3Y7;CON__Q7Z3Z0;CON__Q7Z3Y8;CON__Q2M2I5	CON__P13645	24;10;3;3;2;2;2	24;10;3;3;2;2;2	19;6;1;1;1;1;0	>P13645 SWISS-PROT:P13645 Tax_Id=9606 Gene_Symbol=KRT10 Keratin, type I cytoskeletal 10	7	24	24	19	32.7	32.7	27	59.51	593	593;570;464;486;450;459;525	0	289.08	1788400000	77			+	5	63;118;187;280;344;371;398;414;426;453;573;600;601;602;608;613;614;628;633;641;642;752;789;824	True;True;True;True;True;True;True;True;True;True;True;True;True;True;True;True;True;True;True;True;True;True;True;True	64;122;200;296;364;393;421;437;449;477;611;638;639;640;647;652;653;667;672;681;682;796;833;868	106;206;207;332;333;485;486;589;637;638;639;640;682;683;708;725;774;775;1031;1032;1072;1073;1074;1075;1076;1077;1090;1091;1096;1097;1098;1099;1120;1121;1130;1147;1148;1149;1150;1151;1152;1153;1154;1353;1354;1417;1418;1419;1479;1480	136;137;138;270;271;424;425;426;427;612;613;614;741;796;797;798;799;800;801;847;848;849;850;887;906;966;967;1304;1305;1306;1357;1358;1359;1360;1361;1362;1363;1364;1365;1366;1386;1387;1392;1393;1394;1395;1419;1420;1433;1434;1455;1456;1457;1458;1459;1460;1461;1462;1463;1464;1465;1466;1467;1468;1469;1712;1713;1714;1792;1793;1794;1795;1796;1797;1798;1799;1885;1886;1887;1888	136;270;426;612;741;797;848;887;906;966;1305;1358;1361;1365;1386;1393;1394;1419;1433;1455;1461;1714;1793;1885	3	150
CON__P13647	CON__P13647	13	7	3	>P13647 SWISS-PROT:P13647 Tax_Id=9606 Gene_Symbol=KRT5 Keratin, type II cytoskeletal 5	1	13	7	3	20.8	12.4	5.1	62.378	590	590	0	67.105	102680000	18			+	6	91;203;373;404;410;555;557;561;690;709;810;819;821	True;False;True;True;False;False;False;True;True;True;False;False;True	92;217;395;427;433;589;591;595;596;731;751;752;854;863;865	152;153;360;361;643;644;693;694;702;989;990;991;992;996;997;1004;1005;1006;1246;1247;1278;1279;1280;1451;1452;1471;1474;1475	195;196;197;458;459;804;805;867;868;878;1253;1254;1255;1256;1257;1258;1259;1260;1264;1265;1272;1273;1274;1590;1591;1626;1627;1628;1836;1837;1869;1877;1878;1879	195;459;804;868;878;1254;1264;1273;1590;1626;1836;1869;1879	12;13;14;15	247;274;297;303
CON__P35527;CON__Q99456	CON__P35527	20;1	19;0	19;0	>P35527 SWISS-PROT:P35527 Tax_Id=9606 Gene_Symbol=KRT9 Keratin, type I cytoskeletal 9	2	20	19	19	41.6	40.4	40.4	62.129	623	623;494	0	260.4	1320100000	86			+	7	147;179;211;229;255;259;260;293;345;366;367;414;528;590;591;603;645;672;675;775	True;True;True;True;True;True;True;True;True;True;True;False;True;True;True;True;True;True;True;True	153;191;225;226;245;271;275;276;309;365;366;388;389;437;558;559;628;629;641;642;685;712;715;819	257;314;315;316;317;373;374;375;376;403;404;446;447;452;453;454;455;506;507;508;509;590;591;592;593;594;595;596;597;628;629;630;631;632;708;894;895;896;897;1057;1058;1059;1060;1078;1079;1080;1081;1166;1167;1168;1213;1214;1219;1220;1395;1396;1397	329;404;405;406;407;408;471;472;473;474;475;509;510;511;561;562;568;569;570;571;572;573;574;575;576;577;578;579;634;635;636;637;638;742;743;744;745;746;747;748;749;750;785;786;787;788;789;790;791;887;1111;1112;1113;1114;1115;1116;1117;1118;1333;1334;1335;1336;1337;1338;1339;1340;1367;1368;1369;1370;1371;1483;1484;1485;1486;1543;1544;1545;1546;1555;1556;1557;1763;1764;1765;1766;1767	329;408;472;510;561;572;574;634;746;788;789;887;1116;1334;1340;1367;1484;1546;1557;1765	16;17;18;19;20	157;234;245;269;326
CON__P35908;CON__Q5XKE5;CON__O95678;CON__Q7Z794;CON__Q9R0H5;CON__Q6NXH9;CON__P19013	CON__P35908	21;4;4;3;2;2;2	18;4;3;1;1;1;2	11;0;0;0;0;0;0	>P35908 SWISS-PROT:P35908 Tax_Id=9606 Gene_Symbol=KRT2 Keratin, type II cytoskeletal 2 epidermal	7	21	18	11	34.4	31.3	20.3	65.865	645	645;535;551;578;524;539;594	0	193.13	616090000	56			+	8	92;156;164;203;218;249;258;316;397;410;467;553;557;574;627;651;688;713;819;822;834	True;True;True;True;False;True;True;False;True;True;True;True;True;True;True;True;True;True;False;True;True	93;164;165;174;175;217;233;265;274;332;420;433;493;587;591;612;666;691;728;729;756;863;866;878	154;155;272;273;274;287;288;289;290;360;361;386;387;435;436;450;451;538;539;681;702;799;983;984;996;997;1033;1034;1118;1119;1179;1180;1241;1242;1243;1286;1287;1288;1471;1476;1477;1490;1491	198;199;200;201;202;350;351;352;373;374;375;376;377;378;379;458;459;488;489;490;491;492;546;547;548;549;565;566;567;668;669;670;671;672;846;878;997;1245;1246;1264;1265;1307;1308;1417;1418;1499;1500;1501;1502;1503;1582;1583;1584;1585;1586;1634;1635;1636;1637;1638;1869;1880;1881;1882;1883;1899;1900;1901	199;350;375;459;490;547;566;671;846;878;997;1245;1264;1307;1418;1499;1585;1634;1869;1880;1901	21;22;23	263;300;473
CON__P48668;CON__P04259	CON__P48668;CON__P04259	13;12	1;1	1;1	>P48668 SWISS-PROT:P48668 Tax_Id=9606 Gene_Symbol=KRT6C Keratin, type II cytoskeletal 6C;>P04259 SWISS-PROT:P04259 Tax_Id=9606 Gene_Symbol=KRT6B Keratin, type II cytoskeletal 6B	2	13	1	1	23	1.8	1.8	60.024	564	564;564	0	6.5493	1986500	0			+	9	18;52;92;199;203;410;551;555;557;562;652;810;819	False;False;False;False;False;False;False;False;False;True;False;False;False	18;53;93;213;217;433;585;589;591;597;692;854;863	28;29;86;87;154;155;355;360;361;702;977;978;989;990;991;992;996;997;1007;1008;1181;1182;1451;1452;1471	36;37;112;113;114;198;199;200;201;202;453;458;459;878;1239;1240;1253;1254;1255;1256;1257;1258;1259;1260;1264;1265;1275;1276;1504;1505;1836;1837;1869	36;113;199;453;459;878;1240;1254;1264;1276;1505;1836;1869	4;24	242;452
CON__Q01546	CON__Q01546	6	1	1	>Q01546 SWISS-PROT:Q01546 Tax_Id=9606 Gene_Symbol=KRT76 Keratin, type II cytoskeletal 2 oral	1	6	1	1	6.7	1.1	1.1	65.87	638	638	1	-2	73282000	1	+		+	10	25;164;203;397;410;819	True;False;False;False;False;False	25;174;175;217;420;433;863	40;287;288;289;290;360;361;681;702;1471	53;373;374;375;376;377;378;379;458;459;846;878;1869	53;375;459;846;878;1869	22	472
CON__Q0VBK2	CON__Q0VBK2	1	1	1	>Q0VBK2 TREMBL:Q0VBK2;Q8C1M7 Tax_Id=10090 Gene_Symbol=Krt80 Keratin 80	1	1	1	1	2.7	2.7	2.7	50.66	452	452	0.0041841	5.4984	16060000	0			+	11	512	TRUE	538	868	1082	1082	25	345
CON__Q14CN4-1;CON__Q6IME9;CON__Q3SY84;CON__Q7RTS7;CON__Q32MB2	CON__Q14CN4-1;CON__Q6IME9;CON__Q3SY84;CON__Q7RTS7;CON__Q32MB2	2;2;2;2;2	1;1;1;1;1	1;1;1;1;1	>Q14CN4-1 SWISS-PROT:Q14CN4-1 Tax_Id=9606 Gene_Symbol=KRT72 Isoform 1 of Keratin, type II cytoskeletal 72;>Q6IME9 TREMBL:Q6IME9 Tax_Id=10090 Gene_Symbol=Krt72 Type-II keratin Kb35;>Q3SY84 SWISS-PROT:Q3SY84 Tax_Id=9606 Gene_Symbol=KRT71 Keratin, type II cyt	5	2	1	1	3.7	2.3	2.3	55.877	511	511;520;523;529;540	0	21.163	6328400	4			+	12	203;217	False;True	217;232	360;361;384;385	458;459;484;485;486;487	459;486
CON__Streptavidin	CON__Streptavidin	4	4	4	>Streptavidin (S.avidinii)	1	4	4	4	43.1	43.1	43.1	16.622	160	160	0	98.662	2348500000	104			+	13	358;537;644;817	True;True;True;True	380;571;684;861	618;916;917;918;919;920;921;922;923;924;925;926;927;928;929;930;931;932;933;934;935;936;937;938;939;940;941;942;943;944;945;946;947;948;949;950;951;952;953;954;1157;1158;1159;1160;1161;1162;1163;1164;1165;1463;1464;1465;1466;1467;1468;1469	774;775;1141;1142;1143;1144;1145;1146;1147;1148;1149;1150;1151;1152;1153;1154;1155;1156;1157;1158;1159;1160;1161;1162;1163;1164;1165;1166;1167;1168;1169;1170;1171;1172;1173;1174;1175;1176;1177;1178;1179;1180;1181;1182;1183;1184;1185;1186;1187;1188;1189;1190;1191;1192;1193;1194;1195;1196;1197;1198;1199;1200;1201;1202;1203;1204;1205;1206;1207;1208;1209;1210;1211;1212;1213;1472;1473;1474;1475;1476;1…	775;1170;1475;1858
REV__tr|Q9HXW2|Q9HXW2_PSEAE	REV__tr|Q9HXW2|Q9HXW2_PSEAE	1	1	1	>tr|Q9HXW2|Q9HXW2_PSEAE Probable transcriptional regulator OS=Pseudomonas aeruginosa (strain ATCC 15692 / PAO1 / 1C / PRS 101 / LMG 12228) GN=PA3678 PE=4 SV=1	1	1	1	1	0	0	0	23.15	212	212	0.0047619	6.0215	2102900000	5		+		14	400	TRUE	423	686	855;856;857;858;859	857
REV__tr|Q9I4Y7|Q9I4Y7_PSEAE	REV__tr|Q9I4Y7|Q9I4Y7_PSEAE	1	1	1	>tr|Q9I4Y7|Q9I4Y7_PSEAE Uncharacterized protein OS=Pseudomonas aeruginosa (strain ATCC 15692 / PAO1 / 1C / PRS 101 / LMG 12228) GN=PA0982 PE=4 SV=1	1	1	1	1	0	0	0	19.904	182	182	0.0082305	5.4626	12195000	2		+		15	665	TRUE	705	1201;1202	1530;1531	1531
sp|G3XD61|WBPI_PSEAE	sp|G3XD61|WBPI_PSEAE	1	1	1	>sp|G3XD61|WBPI_PSEAE UDP-2,3-diacetamido-2,3-dideoxy-D-glucuronate 2-epimerase OS=Pseudomonas aeruginosa (strain ATCC 15692 / PAO1 / 1C / PRS 101 / LMG 12228) GN=wbpI PE=1 SV=1	1	1	1	1	3.7	3.7	3.7	38.907	354	354	0	6.3378	1725600	1				16	444	TRUE	468	755	943	943
sp|G3XD76|DAPD_PSEAE	sp|G3XD76|DAPD_PSEAE	1	1	1	>sp|G3XD76|DAPD_PSEAE 2,3,4,5-tetrahydropyridine-2,6-dicarboxylate N-succinyltransferase OS=Pseudomonas aeruginosa (strain ATCC 15692 / PAO1 / 1C / PRS 101 / LMG 12228) GN=dapD PE=1 SV=1	1	1	1	1	3.5	3.5	3.5	35.973	344	344	0	6.4416	2452300	1				17	704	TRUE	745	1268	1612	1612
sp|G3XD94|UGND_PSEAE	sp|G3XD94|UGND_PSEAE	2	2	2	>sp|G3XD94|UGND_PSEAE UDP-N-acetyl-D-glucosamine 6-dehydrogenase OS=Pseudomonas aeruginosa (strain ATCC 15692 / PAO1 / 1C / PRS 101 / LMG 12228) GN=wbpA PE=1 SV=1	1	2	2	2	5.3	5.3	5.3	48.155	436	436	0	14.537	2830700	2				18	95;171	True;True	97;182	161;300	209;390	209;390
sp|O30508|ARUC_PSEAE	sp|O30508|ARUC_PSEAE	3	3	3	>sp|O30508|ARUC_PSEAE Succinylornithine transaminase/acetylornithine aminotransferase OS=Pseudomonas aeruginosa (strain ATCC 15692 / PAO1 / 1C / PRS 101 / LMG 12228) GN=aruC PE=1 SV=2	1	3	3	3	9.4	9.4	9.4	43.747	406	406	0	27.981	5752900	2				19	330;724;815	True;True;True	349;767;859	563;1307;1461	699;1661;1848	699;1661;1848
sp|O50175|ASTB_PSEAE	sp|O50175|ASTB_PSEAE	1	1	1	>sp|O50175|ASTB_PSEAE N-succinylarginine dihydrolase OS=Pseudomonas aeruginosa (strain ATCC 15692 / PAO1 / 1C / PRS 101 / LMG 12228) GN=astB PE=3 SV=1	1	1	1	1	2.5	2.5	2.5	48.874	448	448	0	8.3688	1958800	4				20	655	TRUE	695	1186;1187	1510;1511;1512;1513	1511
sp|O52759|RS4_PSEAE	sp|O52759|RS4_PSEAE	3	3	3	>sp|O52759|RS4_PSEAE 30S ribosomal protein S4 OS=Pseudomonas aeruginosa (strain ATCC 15692 / PAO1 / 1C / PRS 101 / LMG 12228) GN=rpsD PE=3 SV=2	1	3	3	3	16	16	16	23.277	206	206	0	19.267	20744000	3				21	55;418;489	True;True;True	56;441;515	92;713;834;835	119;894;1040;1041	119;894;1041
sp|O52760|RPOA_PSEAE	sp|O52760|RPOA_PSEAE	5	5	5	>sp|O52760|RPOA_PSEAE DNA-directed RNA polymerase subunit alpha OS=Pseudomonas aeruginosa (strain ATCC 15692 / PAO1 / 1C / PRS 101 / LMG 12228) GN=rpoA PE=3 SV=2	1	5	5	5	15.9	15.9	15.9	36.649	333	333	0	40.729	27885000	6				22	30;377;484;525;785	True;True;True;True;True	30;399;510;555;829	46;47;649;826;891;1413	59;60;810;1032;1107;1788	59;810;1032;1107;1788
sp|O52761|RL17_PSEAE	sp|O52761|RL17_PSEAE	1	1	1	>sp|O52761|RL17_PSEAE 50S ribosomal protein L17 OS=Pseudomonas aeruginosa (strain ATCC 15692 / PAO1 / 1C / PRS 101 / LMG 12228) GN=rplQ PE=3 SV=1	1	1	1	1	7.8	7.8	7.8	14.504	129	129	0	6.4786	7507200	2				23	702	TRUE	743	1265;1266	1609;1610	1610
sp|O52762|CATA_PSEAE	sp|O52762|CATA_PSEAE	9	9	9	>sp|O52762|CATA_PSEAE Catalase OS=Pseudomonas aeruginosa (strain ATCC 15692 / PAO1 / 1C / PRS 101 / LMG 12228) GN=katA PE=1 SV=1	1	9	9	9	18.9	18.9	18.9	55.588	482	482	0	64.897	67266000	13				24	143;146;162;225;431;443;497;534;840	True;True;True;True;True;True;True;True;True	148;152;171;241;454;467;523;568;884	248;249;256;282;398;731;751;752;753;754;845;846;912;1500;1501	320;321;328;363;504;912;913;939;940;941;942;1055;1056;1137;1911;1912	321;328;363;504;912;942;1056;1137;1911
sp|O54439|ACP1_PSEAE	sp|O54439|ACP1_PSEAE	1	1	1	>sp|O54439|ACP1_PSEAE Acyl carrier protein 1 OS=Pseudomonas aeruginosa (strain ATCC 15692 / PAO1 / 1C / PRS 101 / LMG 12228) GN=acpP1 PE=3 SV=4	1	1	1	1	11.5	11.5	11.5	8.7406	78	78	0.0043103	5.5519	31210000	2				25	381	TRUE	403	654;655	815;816	816
sp|O68822|AMPA_PSEAE	sp|O68822|AMPA_PSEAE	2	2	2	>sp|O68822|AMPA_PSEAE Cytosol aminopeptidase OS=Pseudomonas aeruginosa (strain ATCC 15692 / PAO1 / 1C / PRS 101 / LMG 12228) GN=pepA PE=3 SV=1	1	2	2	2	5.1	5.1	5.1	52.331	495	495	0	17.556	9054900	3				26	106;449	True;True	110;473	187;188;766	245;246;956	245;956
sp|O69753|PHZB1_PSEAE;sp|Q9S508|PHZB2_PSEAE	sp|O69753|PHZB1_PSEAE;sp|Q9S508|PHZB2_PSEAE	4;3	4;3	4;3	>sp|O69753|PHZB1_PSEAE Phenazine biosynthesis protein PhzB 1 OS=Pseudomonas aeruginosa (strain ATCC 15692 / PAO1 / 1C / PRS 101 / LMG 12228) GN=phzB1 PE=3 SV=1;>sp|Q9S508|PHZB2_PSEAE Phenazine biosynthesis protein PhzB 2 OS=Pseudomonas aeruginosa (strain A	2	4	4	4	28.4	28.4	28.4	18.888	162	162;162	0	42.517	24570000	6				27	74;176;403;581	True;True;True;True	75;187;188;426;619	124;307;308;309;310;691;692;1044	160;397;398;399;400;865;866;1319;1320	160;398;865;1320	26	139
sp|O69754|PHZF_PSEAE	sp|O69754|PHZF_PSEAE	1	1	1	>sp|O69754|PHZF_PSEAE Trans-2,3-dihydro-3-hydroxyanthranilate isomerase OS=Pseudomonas aeruginosa (strain ATCC 15692 / PAO1 / 1C / PRS 101 / LMG 12228) GN=phzF1 PE=3 SV=2	1	1	1	1	4	4	4	30.342	278	278	0	7.0593	1956600	2				28	579	TRUE	617	1041;1042	1316;1317	1316
sp|O82850|RS2_PSEAE	sp|O82850|RS2_PSEAE	2	2	2	>sp|O82850|RS2_PSEAE 30S ribosomal protein S2 OS=Pseudomonas aeruginosa (strain ATCC 15692 / PAO1 / 1C / PRS 101 / LMG 12228) GN=rpsB PE=3 SV=2	1	2	2	2	7.3	7.3	7.3	27.336	246	246	0	11.194	6167600	2				29	335;807	True;True	354;851	570;1448	709;1833	709;1833	27	100
sp|O82851|EFTS_PSEAE	sp|O82851|EFTS_PSEAE	1	1	1	>sp|O82851|EFTS_PSEAE Elongation factor Ts OS=Pseudomonas aeruginosa (strain ATCC 15692 / PAO1 / 1C / PRS 101 / LMG 12228) GN=tsf PE=3 SV=1	1	1	1	1	3.1	3.1	3.1	30.653	289	289	0.0042194	5.5164	1928500	0				30	250	TRUE	266	437	550	550
sp|O86428|ILVE_PSEAE	sp|O86428|ILVE_PSEAE	2	2	2	>sp|O86428|ILVE_PSEAE Branched-chain-amino-acid aminotransferase OS=Pseudomonas aeruginosa (strain ATCC 15692 / PAO1 / 1C / PRS 101 / LMG 12228) GN=ilvE PE=1 SV=2	1	2	2	2	8.1	8.1	8.1	34.084	307	307	0	14.003	11592000	3				31	114;570	True;True	118;608	199;200;1026	260;261;1298	260;1298
sp|O87125|CHEB1_PSEAE	sp|O87125|CHEB1_PSEAE	1	1	1	>sp|O87125|CHEB1_PSEAE Chemotaxis response regulator protein-glutamate methylesterase of group 1 operon OS=Pseudomonas aeruginosa (strain ATCC 15692 / PAO1 / 1C / PRS 101 / LMG 12228) GN=cheB1 PE=1 SV=2	1	1	1	1	4.6	4.6	4.6	39.004	368	368	0	7.9471	120210	2				32	727	TRUE	771	1312	1667;1668	1668
sp|P04739|FMPO_PSEAE	sp|P04739|FMPO_PSEAE	2	2	2	>sp|P04739|FMPO_PSEAE Fimbrial protein OS=Pseudomonas aeruginosa (strain ATCC 15692 / PAO1 / 1C / PRS 101 / LMG 12228) GN=pilA PE=1 SV=1	1	2	2	2	20.1	20.1	20.1	15.512	149	149	0	34.784	17683000	6				33	332;691	True;True	351;732	565;566;1248;1249	702;703;704;705;1592;1593	702;1592
sp|P05384|DBHB_PSEAE	sp|P05384|DBHB_PSEAE	3	3	3	>sp|P05384|DBHB_PSEAE DNA-binding protein HU-beta OS=Pseudomonas aeruginosa (strain ATCC 15692 / PAO1 / 1C / PRS 101 / LMG 12228) GN=hupB PE=1 SV=3	1	3	3	3	50	50	50	9.0865	90	90	0	29.742	34019000	7				34	44;61;615	True;True;True	45;62;654	72;102;103;1100;1101;1102	93;130;131;132;1396;1397;1398;1399	93;130;1399
sp|P08280|RECA_PSEAE	sp|P08280|RECA_PSEAE	1	1	1	>sp|P08280|RECA_PSEAE Protein RecA OS=Pseudomonas aeruginosa (strain ATCC 15692 / PAO1 / 1C / PRS 101 / LMG 12228) GN=recA PE=3 SV=1	1	1	1	1	5.8	5.8	5.8	36.879	346	346	0.0081967	5.4561	7607900	1				35	517	TRUE	545	878	1093	1093	28	201
sp|P08308|OTCC_PSEAE	sp|P08308|OTCC_PSEAE	10	10	10	>sp|P08308|OTCC_PSEAE Ornithine carbamoyltransferase, catabolic OS=Pseudomonas aeruginosa (strain ATCC 15692 / PAO1 / 1C / PRS 101 / LMG 12228) GN=arcB PE=1 SV=3	1	10	10	10	29.8	29.8	29.8	38.108	336	336	0	67.147	267700000	25				36	178;185;494;495;533;550;558;565;588;837	True;True;True;True;True;True;True;True;True;True	190;197;198;520;521;566;567;584;592;602;603;626;881	312;313;326;327;328;329;841;842;843;908;909;910;911;975;976;998;999;1016;1017;1018;1053;1054;1495;1496	402;403;417;418;419;420;421;1050;1051;1052;1053;1132;1133;1134;1135;1136;1237;1238;1266;1267;1287;1288;1289;1329;1330;1905;1906	402;419;1050;1053;1133;1237;1267;1288;1329;1905	29;30;31;32	101;169;258;261
sp|P09591|EFTU_PSEAE	sp|P09591|EFTU_PSEAE	11	11	11	>sp|P09591|EFTU_PSEAE Elongation factor Tu OS=Pseudomonas aeruginosa (strain ATCC 15692 / PAO1 / 1C / PRS 101 / LMG 12228) GN=tufA PE=1 SV=2	1	11	11	11	35.8	35.8	35.8	43.369	397	397	0	115.97	655800000	35				37	37;46;129;208;268;290;300;499;531;554;777	True;True;True;True;True;True;True;True;True;True;True	37;47;133;222;284;306;316;525;562;563;588;821	59;60;74;75;225;369;468;469;470;502;503;516;849;850;901;902;903;904;985;986;987;988;1400;1401	79;80;96;97;98;99;293;467;593;594;595;596;630;631;645;1059;1060;1061;1062;1063;1122;1123;1124;1125;1126;1247;1248;1249;1250;1251;1252;1770;1771;1772;1773	80;98;293;467;595;631;645;1060;1123;1249;1771	33;34	362;372
sp|P11221|OPRI_PSEAE	sp|P11221|OPRI_PSEAE	2	2	2	>sp|P11221|OPRI_PSEAE Major outer membrane lipoprotein OS=Pseudomonas aeruginosa (strain ATCC 15692 / PAO1 / 1C / PRS 101 / LMG 12228) GN=oprI PE=3 SV=1	1	2	2	2	25.3	25.3	25.3	8.8348	83	83	0	15.401	4248300	6				38	387;492	True;True	409;518	666;838;839	828;1044;1045;1046;1047;1048	828;1047
sp|P13794|PORF_PSEAE	sp|P13794|PORF_PSEAE	11	11	11	>sp|P13794|PORF_PSEAE Outer membrane porin F OS=Pseudomonas aeruginosa (strain ATCC 15692 / PAO1 / 1C / PRS 101 / LMG 12228) GN=oprF PE=1 SV=1	1	11	11	11	33.4	33.4	33.4	37.639	350	350	0	110.55	325390000	37				39	97;160;556;598;604;607;714;764;765;827;846	True;True;True;True;True;True;True;True;True;True;True	99;169;590;636;643;646;757;808;809;871;890	163;164;279;280;993;994;995;1070;1082;1086;1087;1088;1089;1289;1290;1373;1374;1375;1376;1377;1378;1483;1510	211;212;213;358;359;360;361;1261;1262;1263;1354;1372;1373;1377;1378;1379;1380;1381;1382;1383;1384;1385;1639;1640;1641;1642;1643;1734;1735;1736;1737;1738;1739;1740;1741;1742;1892;1921	212;361;1261;1354;1373;1378;1640;1735;1742;1892;1921	35;36	134;136
sp|P13981|ARCA_PSEAE	sp|P13981|ARCA_PSEAE	13	13	13	>sp|P13981|ARCA_PSEAE Arginine deiminase OS=Pseudomonas aeruginosa (strain ATCC 15692 / PAO1 / 1C / PRS 101 / LMG 12228) GN=arcA PE=1 SV=2	1	13	13	13	32.1	32.1	32.1	46.435	418	418	0	118.37	340830000	30				40	49;136;142;198;374;388;571;586;589;606;650;745;797	True;True;True;True;True;True;True;True;True;True;True;True;True	50;140;147;212;396;410;609;624;627;645;690;789;841	79;80;234;235;246;247;354;645;646;667;668;1027;1028;1050;1051;1055;1056;1084;1085;1177;1178;1343;1433	104;105;303;304;305;316;317;318;319;452;806;807;829;830;831;1299;1300;1301;1326;1327;1331;1332;1375;1376;1495;1496;1497;1498;1700;1814;1815	105;304;316;452;807;831;1301;1326;1331;1376;1496;1700;1814
sp|P13982|ARCC_PSEAE	sp|P13982|ARCC_PSEAE	2	2	2	>sp|P13982|ARCC_PSEAE Carbamate kinase OS=Pseudomonas aeruginosa (strain ATCC 15692 / PAO1 / 1C / PRS 101 / LMG 12228) GN=arcC PE=3 SV=1	1	2	2	2	7.4	7.4	7.4	33.08	310	310	0	14.089	15815000	7				41	50;439	True;True	51;463	81;82;83;84;745;746	106;107;108;109;110;931;932;933	109;933	37	262
sp|P14165|CISY_PSEAE	sp|P14165|CISY_PSEAE	1	1	1	>sp|P14165|CISY_PSEAE Citrate synthase OS=Pseudomonas aeruginosa (strain ATCC 15692 / PAO1 / 1C / PRS 101 / LMG 12228) GN=gltA PE=3 SV=2	1	1	1	1	3	3	3	47.694	428	428	0	7.7648	1295900	1				42	518	TRUE	546	879	1094	1094	38	275
sp|P28810|MMSA_PSEAE	sp|P28810|MMSA_PSEAE	1	1	1	>sp|P28810|MMSA_PSEAE Methylmalonate-semialdehyde dehydrogenase [acylating] OS=Pseudomonas aeruginosa (strain ATCC 15692 / PAO1 / 1C / PRS 101 / LMG 12228) GN=mmsA PE=1 SV=2	1	1	1	1	4.4	4.4	4.4	53.663	497	497	0	11.537	5894900	4				43	780	TRUE	824	1405;1406	1777;1778;1779;1780	1779
sp|P30718|CH60_PSEAE	sp|P30718|CH60_PSEAE	13	13	13	>sp|P30718|CH60_PSEAE 60 kDa chaperonin OS=Pseudomonas aeruginosa (strain ATCC 15692 / PAO1 / 1C / PRS 101 / LMG 12228) GN=groL PE=1 SV=3	1	13	13	13	28	28	28	57.085	547	547	0	146.9	336260000	46				44	10;72;104;140;188;189;241;394;521;593;595;716;725	True;True;True;True;True;True;True;True;True;True;True;True;True	10;73;106;107;108;144;145;201;202;203;257;417;549;550;631;633;759;768;769	15;16;17;120;121;179;180;181;182;183;184;240;241;242;243;244;334;335;336;337;338;339;423;678;882;883;884;885;1062;1063;1066;1067;1293;1308;1309;1310	19;20;21;22;23;24;155;156;157;235;236;237;238;239;240;241;242;310;311;312;313;314;428;429;430;431;432;433;434;435;436;533;843;1097;1098;1099;1100;1342;1343;1344;1347;1348;1646;1662;1663;1664;1665	21;155;242;310;428;433;533;843;1100;1344;1347;1646;1662	39;40;41;42;43;44	16;69;111;114;233;389
sp|P30720|CH10_PSEAE	sp|P30720|CH10_PSEAE	1	1	1	>sp|P30720|CH10_PSEAE 10 kDa chaperonin OS=Pseudomonas aeruginosa (strain ATCC 15692 / PAO1 / 1C / PRS 101 / LMG 12228) GN=groS PE=3 SV=1	1	1	1	1	13.4	13.4	13.4	10.267	97	97	0.0041152	5.4671	4299800	1				45	798	TRUE	842	1434	1816	1816
sp|P32722|PORD_PSEAE	sp|P32722|PORD_PSEAE	3	3	3	>sp|P32722|PORD_PSEAE Porin D OS=Pseudomonas aeruginosa (strain ATCC 15692 / PAO1 / 1C / PRS 101 / LMG 12228) GN=oprD PE=1 SV=1	1	3	3	3	9.7	9.7	9.7	48.36	443	443	0	24.907	3093500	3				46	76;664;736	True;True;True	77;704;780	126;1199;1200;1327	162;1528;1529;1684	162;1528;1684	45	111
sp|P37798|ACCC_PSEAE	sp|P37798|ACCC_PSEAE	4	4	4	>sp|P37798|ACCC_PSEAE Biotin carboxylase OS=Pseudomonas aeruginosa (strain ATCC 15692 / PAO1 / 1C / PRS 101 / LMG 12228) GN=accC PE=1 SV=1	1	4	4	4	11.6	11.6	11.6	48.887	449	449	0	30.72	25466000	9				47	233;538;619;741	True;True;True;True	249;572;658;785	410;411;955;956;1107;1108;1335;1336	517;518;519;1214;1215;1404;1405;1692;1693	517;1215;1404;1692
sp|P37799|BCCP_PSEAE	sp|P37799|BCCP_PSEAE	6	6	6	>sp|P37799|BCCP_PSEAE Biotin carboxyl carrier protein of acetyl-CoA carboxylase OS=Pseudomonas aeruginosa (strain ATCC 15692 / PAO1 / 1C / PRS 101 / LMG 12228) GN=accB PE=3 SV=1	1	6	6	6	57.7	57.7	57.7	16.455	156	156	0	83.526	801560000	28				48	9;390;447;470;638;653	True;True;True;True;True;True	9;412;471;496;677;678;693	13;14;670;671;672;762;763;804;1137;1138;1139;1140;1141;1142;1143;1183	13;14;15;16;17;18;833;834;835;836;837;950;951;952;953;1003;1004;1443;1444;1445;1446;1447;1448;1449;1450;1451;1506;1507	17;834;950;1003;1446;1506	46	87
sp|P38100|CARB_PSEAE	sp|P38100|CARB_PSEAE	1	1	1	>sp|P38100|CARB_PSEAE Carbamoyl-phosphate synthase large chain OS=Pseudomonas aeruginosa (strain ATCC 15692 / PAO1 / 1C / PRS 101 / LMG 12228) GN=carB PE=3 SV=3	1	1	1	1	1.4	1.4	1.4	117.33	1073	1073	0	11.706	2627800	1				49	679	TRUE	719	1229	1569	1569
sp|P43334|PH4H_PSEAE	sp|P43334|PH4H_PSEAE	1	1	1	>sp|P43334|PH4H_PSEAE Phenylalanine-4-hydroxylase OS=Pseudomonas aeruginosa (strain ATCC 15692 / PAO1 / 1C / PRS 101 / LMG 12228) GN=phhA PE=3 SV=2	1	1	1	1	3.4	3.4	3.4	30.321	262	262	0.0045249	5.7238	2180400	0				50	363	TRUE	385	625	782	782
sp|P43336|PHHC_PSEAE	sp|P43336|PHHC_PSEAE	2	2	2	>sp|P43336|PHHC_PSEAE Aromatic-amino-acid aminotransferase OS=Pseudomonas aeruginosa (strain ATCC 15692 / PAO1 / 1C / PRS 101 / LMG 12228) GN=phhC PE=3 SV=2	1	2	2	2	7.3	7.3	7.3	43.273	399	399	0	15.022	6748600	3				51	13;329	True;True	13;348	21;22;562	29;30;698	30;698
sp|P47203|FTSA_PSEAE	sp|P47203|FTSA_PSEAE	1	1	1	>sp|P47203|FTSA_PSEAE Cell division protein FtsA OS=Pseudomonas aeruginosa (strain ATCC 15692 / PAO1 / 1C / PRS 101 / LMG 12228) GN=ftsA PE=3 SV=2	1	1	1	1	2.4	2.4	2.4	44.646	417	417	0	6.1406	3490800	1				52	682	TRUE	722	1233	1573	1573
sp|P47204|FTSZ_PSEAE	sp|P47204|FTSZ_PSEAE	1	1	1	>sp|P47204|FTSZ_PSEAE Cell division protein FtsZ OS=Pseudomonas aeruginosa (strain ATCC 15692 / PAO1 / 1C / PRS 101 / LMG 12228) GN=ftsZ PE=1 SV=2	1	1	1	1	3	3	3	41.218	394	394	0	7.0371	1318400	1				53	269	TRUE	285	471	597	597
sp|P53593|SUCC_PSEAE	sp|P53593|SUCC_PSEAE	9	9	9	>sp|P53593|SUCC_PSEAE Succinyl-CoA ligase [ADP-forming] subunit beta OS=Pseudomonas aeruginosa (strain ATCC 15692 / PAO1 / 1C / PRS 101 / LMG 12228) GN=sucC PE=3 SV=2	1	9	9	9	26	26	26	41.542	388	388	0	82.209	137330000	18				54	35;101;182;324;337;356;425;560;580	True;True;True;True;True;True;True;True;True	35;103;194;342;356;378;448;594;618	55;56;171;172;321;322;554;572;573;614;615;723;724;1002;1003;1043	74;75;223;224;225;226;227;412;413;689;711;712;770;771;904;905;1270;1271;1318	74;226;413;689;711;771;904;1270;1318
sp|P53641|SODF_PSEAE	sp|P53641|SODF_PSEAE	3	3	3	>sp|P53641|SODF_PSEAE Superoxide dismutase [Fe] OS=Pseudomonas aeruginosa (strain ATCC 15692 / PAO1 / 1C / PRS 101 / LMG 12228) GN=sodB PE=3 SV=3	1	3	3	3	18.7	18.7	18.7	21.351	193	193	0	18.616	61629000	7				55	38;539;630	True;True;True	38;573;669	61;62;957;958;1124;1125	81;82;1216;1217;1218;1426;1427	81;1217;1426
sp|P54292|RHLR_PSEAE	sp|P54292|RHLR_PSEAE	1	1	1	>sp|P54292|RHLR_PSEAE Regulatory protein RhlR OS=Pseudomonas aeruginosa (strain ATCC 15692 / PAO1 / 1C / PRS 101 / LMG 12228) GN=rhlR PE=3 SV=1	1	1	1	1	5.4	5.4	5.4	27.577	241	241	0	7.3961	1260300	3				56	83	TRUE	84	137;138	178;179;180	178
sp|P57112|STHA_PSEAE	sp|P57112|STHA_PSEAE	1	1	1	>sp|P57112|STHA_PSEAE Soluble pyridine nucleotide transhydrogenase OS=Pseudomonas aeruginosa (strain ATCC 15692 / PAO1 / 1C / PRS 101 / LMG 12228) GN=sthA PE=1 SV=2	1	1	1	1	2.8	2.8	2.8	51.16	464	464	0.004717	5.975	1085700	1				57	609	TRUE	648	1092	1388	1388
sp|P72173|AAT_PSEAE	sp|P72173|AAT_PSEAE	3	3	3	>sp|P72173|AAT_PSEAE Aspartate aminotransferase OS=Pseudomonas aeruginosa (strain ATCC 15692 / PAO1 / 1C / PRS 101 / LMG 12228) GN=aspC PE=3 SV=2	1	3	3	3	9.8	9.8	9.8	43.319	398	398	0	27.16	6574900	4				58	457;801;845	True;True;True	481;845;889	780;781;1438;1508;1509	973;974;1820;1919;1920	974;1820;1919
sp|Q51422|SYDND_PSEAE	sp|Q51422|SYDND_PSEAE	3	3	3	>sp|Q51422|SYDND_PSEAE Aspartate--tRNA(Asp/Asn) ligase OS=Pseudomonas aeruginosa (strain ATCC 15692 / PAO1 / 1C / PRS 101 / LMG 12228) GN=aspS PE=1 SV=2	1	3	3	3	7.8	7.8	7.8	66.207	591	591	0	36.27	10045000	5				59	361;686;728	True;True;True	383;726;772	622;623;1238;1239;1313;1314	779;780;1578;1579;1580;1669;1670	780;1578;1669	47	565
sp|Q51561|RPOB_PSEAE	sp|Q51561|RPOB_PSEAE	11	11	11	>sp|Q51561|RPOB_PSEAE DNA-directed RNA polymerase subunit beta OS=Pseudomonas aeruginosa (strain ATCC 15692 / PAO1 / 1C / PRS 101 / LMG 12228) GN=rpoB PE=3 SV=2	1	11	11	11	9.9	9.9	9.9	150.84	1357	1357	0	105.98	48381000	17				60	79;173;263;277;382;401;475;486;522;643;828	True;True;True;True;True;True;True;True;True;True;True	80;184;279;293;404;424;501;512;551;683;872	130;131;302;461;481;656;657;687;688;812;828;829;886;1155;1156;1484	166;167;168;392;585;608;817;818;860;861;1015;1034;1035;1101;1102;1470;1471;1893	166;392;585;608;818;860;1015;1034;1101;1471;1893	48;49	658;1225
sp|Q51567|SUCD_PSEAE	sp|Q51567|SUCD_PSEAE	7	7	7	>sp|Q51567|SUCD_PSEAE Succinyl-CoA ligase [ADP-forming] subunit alpha OS=Pseudomonas aeruginosa (strain ATCC 15692 / PAO1 / 1C / PRS 101 / LMG 12228) GN=sucD PE=3 SV=2	1	7	7	7	31.2	31.2	31.2	30.266	295	295	0	50.988	87384000	17				61	59;77;152;200;261;326;623	True;True;True;True;True;True;True	60;78;159;214;277;344;345;662	99;100;127;264;265;356;357;456;457;458;556;557;558;1113	127;128;163;337;338;339;340;341;454;455;580;581;582;691;692;693;694;1412	128;163;341;454;580;692;1412	50	138
sp|Q59636|NDK_PSEAE	sp|Q59636|NDK_PSEAE	2	2	2	>sp|Q59636|NDK_PSEAE Nucleoside diphosphate kinase OS=Pseudomonas aeruginosa (strain ATCC 15692 / PAO1 / 1C / PRS 101 / LMG 12228) GN=ndk PE=3 SV=2	1	2	2	2	14.7	14.7	14.7	15.592	143	143	0	14.109	17286000	4				62	572;676	True;True	610;716	1029;1030;1221;1222	1302;1303;1558;1559	1302;1558
sp|Q59637|ODP1_PSEAE	sp|Q59637|ODP1_PSEAE	12	12	12	>sp|Q59637|ODP1_PSEAE Pyruvate dehydrogenase E1 component OS=Pseudomonas aeruginosa (strain ATCC 15692 / PAO1 / 1C / PRS 101 / LMG 12228) GN=aceE PE=3 SV=2	1	12	12	12	14.3	14.3	14.3	99.563	882	882	0	74.158	63029000	16				63	7;139;153;166;232;273;322;339;372;384;478;523	True;True;True;True;True;True;True;True;True;True;True;True	7;143;160;177;248;289;340;358;394;406;504;552	11;239;266;292;408;409;475;551;552;576;577;641;642;659;660;818;887	11;309;342;381;515;516;602;686;687;715;716;717;802;803;820;821;1023;1103	11;309;342;381;516;602;686;717;802;821;1023;1103	51;52	66;456
sp|Q59638|ODP2_PSEAE	sp|Q59638|ODP2_PSEAE	8	8	8	>sp|Q59638|ODP2_PSEAE Dihydrolipoyllysine-residue acetyltransferase component of pyruvate dehydrogenase complex OS=Pseudomonas aeruginosa (strain ATCC 15692 / PAO1 / 1C / PRS 101 / LMG 12228) GN=aceF PE=2 SV=2	1	8	8	8	23.8	23.8	23.8	56.708	547	547	0	57.99	54406000	19				64	19;20;22;437;451;463;498;729	True;True;True;True;True;True;True;True	19;20;22;460;475;488;524;773	30;31;32;33;36;37;740;771;772;791;847;848;1315;1316	38;39;40;41;42;43;48;49;50;922;961;962;963;964;986;1057;1058;1671;1672	39;41;48;922;962;986;1058;1671	53	328
sp|Q9HT14|ATP6_PSEAE	sp|Q9HT14|ATP6_PSEAE	1	1	1	>sp|Q9HT14|ATP6_PSEAE ATP synthase subunit a OS=Pseudomonas aeruginosa (strain ATCC 15692 / PAO1 / 1C / PRS 101 / LMG 12228) GN=atpB PE=3 SV=1	1	1	1	1	3.5	3.5	3.5	31.92	289	289	0.0080972	5.4417	1837700	1				65	375	TRUE	397	647	808	808
sp|Q9HT16|ATPF_PSEAE	sp|Q9HT16|ATPF_PSEAE	2	2	2	>sp|Q9HT16|ATPF_PSEAE ATP synthase subunit b OS=Pseudomonas aeruginosa (strain ATCC 15692 / PAO1 / 1C / PRS 101 / LMG 12228) GN=atpF PE=3 SV=1	1	2	2	2	13.5	13.5	13.5	16.956	156	156	0	14.288	13407000	2				66	89;302	True;True	90;318	148;149;518	190;191;647	191;647
sp|Q9HT18|ATPA_PSEAE	sp|Q9HT18|ATPA_PSEAE	13	13	13	>sp|Q9HT18|ATPA_PSEAE ATP synthase subunit alpha OS=Pseudomonas aeruginosa (strain ATCC 15692 / PAO1 / 1C / PRS 101 / LMG 12228) GN=atpA PE=3 SV=1	1	13	13	13	29.6	29.6	29.6	55.393	514	514	0	118.14	213010000	26				67	149;170;239;248;348;524;544;646;647;654;706;782;795	True;True;True;True;True;True;True;True;True;True;True;True;True	155;181;255;264;369;553;554;578;686;687;694;748;826;839	259;298;299;419;420;433;434;600;601;888;889;890;965;966;1169;1170;1171;1172;1184;1185;1273;1409;1430;1431	331;388;389;528;529;530;544;545;755;756;757;1104;1105;1106;1226;1227;1487;1488;1489;1490;1508;1509;1617;1783;1784;1811;1812	331;388;529;544;756;1106;1226;1487;1489;1508;1617;1783;1811	54;55	1;157
sp|Q9HT19|ATPG_PSEAE	sp|Q9HT19|ATPG_PSEAE	1	1	1	>sp|Q9HT19|ATPG_PSEAE ATP synthase gamma chain OS=Pseudomonas aeruginosa (strain ATCC 15692 / PAO1 / 1C / PRS 101 / LMG 12228) GN=atpG PE=3 SV=1	1	1	1	1	3.1	3.1	3.1	31.553	286	286	0	7.2617	4814300	3				68	632	TRUE	671	1128;1129	1430;1431;1432	1430
sp|Q9HT20|ATPB_PSEAE	sp|Q9HT20|ATPB_PSEAE	7	7	7	>sp|Q9HT20|ATPB_PSEAE ATP synthase subunit beta OS=Pseudomonas aeruginosa (strain ATCC 15692 / PAO1 / 1C / PRS 101 / LMG 12228) GN=atpD PE=3 SV=1	1	7	7	7	24.2	24.2	24.2	49.499	458	458	0	100.18	65283000	19				69	138;168;354;596;705;733;843	True;True;True;True;True;True;True	142;179;375;376;634;746;747;777;887	237;238;295;296;610;611;1068;1269;1270;1271;1272;1322;1323;1505;1506	307;308;384;385;386;766;767;1349;1350;1351;1352;1613;1614;1615;1616;1678;1679;1916;1917	307;384;767;1352;1613;1678;1916	56;57	87;225
sp|Q9HT21|ATPE_PSEAE	sp|Q9HT21|ATPE_PSEAE	2	2	2	>sp|Q9HT21|ATPE_PSEAE ATP synthase epsilon chain OS=Pseudomonas aeruginosa (strain ATCC 15692 / PAO1 / 1C / PRS 101 / LMG 12228) GN=atpC PE=3 SV=1	1	2	2	2	16.3	16.3	16.3	14.726	141	141	0	12.665	5079600	3				70	42;402	True;True	43;425	70;689;690	91;862;863;864	91;863
sp|Q9HT95|ATSE4_PSEAE	sp|Q9HT95|ATSE4_PSEAE	2	2	2	>sp|Q9HT95|ATSE4_PSEAE Acetyltransferase PA5475 OS=Pseudomonas aeruginosa (strain ATCC 15692 / PAO1 / 1C / PRS 101 / LMG 12228) GN=PA5475 PE=3 SV=1	1	2	2	2	11.8	11.8	11.8	21	186	186	0	14.045	1270900	3				71	145;597	True;True	151;635	254;255;1069	326;327;1353	326;1353	58	148
sp|Q9HTD7|ASPA_PSEAE	sp|Q9HTD7|ASPA_PSEAE	1	1	1	>sp|Q9HTD7|ASPA_PSEAE Aspartate ammonia-lyase OS=Pseudomonas aeruginosa (strain ATCC 15692 / PAO1 / 1C / PRS 101 / LMG 12228) GN=aspA PE=3 SV=1	1	1	1	1	4.9	4.9	4.9	51.069	474	474	0	9.4536	2048900	1				72	836	TRUE	880	1494	1904	1904
sp|Q9HTF1|LTAE_PSEAE	sp|Q9HTF1|LTAE_PSEAE	1	1	1	>sp|Q9HTF1|LTAE_PSEAE Low specificity L-threonine aldolase OS=Pseudomonas aeruginosa (strain ATCC 15692 / PAO1 / 1C / PRS 101 / LMG 12228) GN=ltaE PE=3 SV=1	1	1	1	1	2.9	2.9	2.9	38.213	346	346	0.0044643	5.6934	1874700	1				73	458	TRUE	482	782	975	975
sp|Q9HTN8|RL28_PSEAE	sp|Q9HTN8|RL28_PSEAE	1	1	1	>sp|Q9HTN8|RL28_PSEAE 50S ribosomal protein L28 OS=Pseudomonas aeruginosa (strain ATCC 15692 / PAO1 / 1C / PRS 101 / LMG 12228) GN=rpmB PE=3 SV=1	1	1	1	1	12.8	12.8	12.8	9.0655	78	78	0.0079681	5.4303	1637600	0				74	266	TRUE	282	466	591	591
sp|Q9HTZ7|PCKA_PSEAE	sp|Q9HTZ7|PCKA_PSEAE	1	1	1	>sp|Q9HTZ7|PCKA_PSEAE Phosphoenolpyruvate carboxykinase [ATP] OS=Pseudomonas aeruginosa (strain ATCC 15692 / PAO1 / 1C / PRS 101 / LMG 12228) GN=pckA PE=3 SV=1	1	1	1	1	2.5	2.5	2.5	55.731	513	513	0	8.4795	769960	1				75	529	TRUE	560	898	1119	1119
sp|Q9HUC8|SYR_PSEAE	sp|Q9HUC8|SYR_PSEAE	2	2	2	>sp|Q9HUC8|SYR_PSEAE Arginine--tRNA ligase OS=Pseudomonas aeruginosa (strain ATCC 15692 / PAO1 / 1C / PRS 101 / LMG 12228) GN=argS PE=3 SV=1	1	2	2	2	3.7	3.7	3.7	65.199	587	587	0	16.756	7914700	3				76	445;754	True;True	469;798	756;757;1356	944;945;1716	945;1716
sp|Q9HUM6|PURA_PSEAE	sp|Q9HUM6|PURA_PSEAE	2	2	2	>sp|Q9HUM6|PURA_PSEAE Adenylosuccinate synthetase OS=Pseudomonas aeruginosa (strain ATCC 15692 / PAO1 / 1C / PRS 101 / LMG 12228) GN=purA PE=3 SV=1	1	2	2	2	4.9	4.9	4.9	46.814	430	430	0	16.548	14600000	4				77	420;670	True;True	443;710	715;716;1210;1211	896;897;1540;1541	896;1540
sp|Q9HUM9|RS6_PSEAE	sp|Q9HUM9|RS6_PSEAE	2	2	2	>sp|Q9HUM9|RS6_PSEAE 30S ribosomal protein S6 OS=Pseudomonas aeruginosa (strain ATCC 15692 / PAO1 / 1C / PRS 101 / LMG 12228) GN=rpsF PE=3 SV=1	1	2	2	2	15.8	15.8	15.8	16.164	139	139	0	16.862	14506000	3				78	58;130	True;True	59;134	97;98;226	125;126;294	125;294	59	102
sp|Q9HV43|DNAK_PSEAE	sp|Q9HV43|DNAK_PSEAE	13	13	13	>sp|Q9HV43|DNAK_PSEAE Chaperone protein DnaK OS=Pseudomonas aeruginosa (strain ATCC 15692 / PAO1 / 1C / PRS 101 / LMG 12228) GN=dnaK PE=3 SV=1	1	13	13	13	26.8	26.8	26.8	68.402	637	637	0	147.65	100500000	25				79	1;17;57;66;117;207;210;338;429;446;511;532;640	True;True;True;True;True;True;True;True;True;True;True;True;True	1;17;58;67;121;221;224;357;452;470;537;564;565;680	1;2;3;4;27;95;96;110;111;205;368;372;574;575;729;758;759;760;761;867;905;906;907;1146	1;2;3;4;35;122;123;124;142;143;144;268;269;466;470;713;714;910;946;947;948;949;1081;1127;1128;1129;1130;1131;1454	2;35;122;142;268;466;470;714;910;948;1081;1131;1454	60	602
sp|Q9HV55|IF2_PSEAE	sp|Q9HV55|IF2_PSEAE	3	3	3	>sp|Q9HV55|IF2_PSEAE Translation initiation factor IF-2 OS=Pseudomonas aeruginosa (strain ATCC 15692 / PAO1 / 1C / PRS 101 / LMG 12228) GN=infB PE=3 SV=1	1	3	3	3	4.2	4.2	4.2	90.911	840	840	0	19.139	5495000	2				80	276;311;693	True;True;True	292;327;734	480;532;1254	607;661;1598	607;661;1598
sp|Q9HV59|PNP_PSEAE	sp|Q9HV59|PNP_PSEAE	7	7	7	>sp|Q9HV59|PNP_PSEAE Polyribonucleotide nucleotidyltransferase OS=Pseudomonas aeruginosa (strain ATCC 15692 / PAO1 / 1C / PRS 101 / LMG 12228) GN=pnp PE=3 SV=1	1	7	7	7	11.1	11.1	11.1	75.452	701	701	0	42.666	36127000	11				81	78;87;127;157;181;318;761	True;True;True;True;True;True;True	79;88;131;166;193;335;805	128;129;145;222;223;275;276;320;543;544;1368;1369	164;165;187;290;291;353;354;411;678;679;1729;1730	164;187;290;353;411;679;1730	61	467
sp|Q9HVA2|ILVC_PSEAE	sp|Q9HVA2|ILVC_PSEAE	1	1	1	>sp|Q9HVA2|ILVC_PSEAE Ketol-acid reductoisomerase OS=Pseudomonas aeruginosa (strain ATCC 15692 / PAO1 / 1C / PRS 101 / LMG 12228) GN=ilvC PE=1 SV=1	1	1	1	1	3.6	3.6	3.6	36.424	338	338	0.0046948	5.9313	5635000	2				82	508	TRUE	534	862;863	1075;1076	1076
sp|Q9HVC4|RL25_PSEAE	sp|Q9HVC4|RL25_PSEAE	3	3	3	>sp|Q9HVC4|RL25_PSEAE 50S ribosomal protein L25 OS=Pseudomonas aeruginosa (strain ATCC 15692 / PAO1 / 1C / PRS 101 / LMG 12228) GN=rplY PE=3 SV=1	1	3	3	3	27	27	27	21.962	204	204	0	33.154	55032000	7				83	286;456;721	True;True;True	302;480;764	493;494;779;1301;1302;1303;1304	621;622;972;1655;1656;1657;1658	621;972;1655
sp|Q9HVC5|KPRS_PSEAE	sp|Q9HVC5|KPRS_PSEAE	1	1	1	>sp|Q9HVC5|KPRS_PSEAE Ribose-phosphate pyrophosphokinase OS=Pseudomonas aeruginosa (strain ATCC 15692 / PAO1 / 1C / PRS 101 / LMG 12228) GN=prs PE=3 SV=1	1	1	1	1	4.2	4.2	4.2	34.04	313	313	1	-2	1147000	0	+			84	794	TRUE	838	1429	1810	1810	62	116
sp|Q9HVD1|PAGL_PSEAE	sp|Q9HVD1|PAGL_PSEAE	1	1	1	>sp|Q9HVD1|PAGL_PSEAE Lipid A deacylase PagL OS=Pseudomonas aeruginosa (strain ATCC 15692 / PAO1 / 1C / PRS 101 / LMG 12228) GN=pagL PE=1 SV=1	1	1	1	1	8.7	8.7	8.7	18.393	173	173	0	10.088	4302200	2				85	731	TRUE	775	1319;1320	1675;1676	1676
sp|Q9HVI7|GLYA3_PSEAE	sp|Q9HVI7|GLYA3_PSEAE	3	3	3	>sp|Q9HVI7|GLYA3_PSEAE Serine hydroxymethyltransferase 3 OS=Pseudomonas aeruginosa (strain ATCC 15692 / PAO1 / 1C / PRS 101 / LMG 12228) GN=glyA2 PE=3 SV=1	1	3	3	3	7	7	7	45.157	417	417	0	18.613	10302000	2				86	541;637;698	True;True;True	575;676;739	961;1135;1136;1259;1260	1221;1441;1442;1603;1604	1221;1442;1604	63	297
sp|Q9HVL6|RL21_PSEAE	sp|Q9HVL6|RL21_PSEAE	2	2	2	>sp|Q9HVL6|RL21_PSEAE 50S ribosomal protein L21 OS=Pseudomonas aeruginosa (strain ATCC 15692 / PAO1 / 1C / PRS 101 / LMG 12228) GN=rplU PE=3 SV=1	1	2	2	2	20.4	20.4	20.4	11.653	103	103	0	11.956	15842000	3				87	328;759	True;True	347;803	560;561;1364;1365	696;697;1725;1726	697;1725
sp|Q9HVM4|SYI_PSEAE	sp|Q9HVM4|SYI_PSEAE	1	1	1	>sp|Q9HVM4|SYI_PSEAE Isoleucine--tRNA ligase OS=Pseudomonas aeruginosa (strain ATCC 15692 / PAO1 / 1C / PRS 101 / LMG 12228) GN=ileS PE=3 SV=1	1	1	1	1	1.1	1.1	1.1	105.46	943	943	0	6.2298	1612900	1				88	242	TRUE	258	424	534	534
sp|Q9HVN5|CLPB_PSEAE	sp|Q9HVN5|CLPB_PSEAE	5	4	4	>sp|Q9HVN5|CLPB_PSEAE Chaperone protein ClpB OS=Pseudomonas aeruginosa (strain ATCC 15692 / PAO1 / 1C / PRS 101 / LMG 12228) GN=clpB PE=3 SV=1	1	5	4	4	7.3	5.7	5.7	95.004	854	854	0	33.527	7107600	8				89	33;252;310;369;566	True;True;True;True;False	33;268;326;391;604	51;52;439;440;531;634;635;1019;1020	68;69;70;71;552;553;660;793;794;1290;1291	69;552;660;793;1291
sp|Q9HVT8|GATA_PSEAE	sp|Q9HVT8|GATA_PSEAE	1	1	1	>sp|Q9HVT8|GATA_PSEAE Glutamyl-tRNA(Gln) amidotransferase subunit A OS=Pseudomonas aeruginosa (strain ATCC 15692 / PAO1 / 1C / PRS 101 / LMG 12228) GN=gatA PE=1 SV=1	1	1	1	1	3.3	3.3	3.3	51.862	484	484	0	7.8697	826580	3				90	770	TRUE	814	1386;1387	1752;1753;1754	1754
sp|Q9HVW7|MURA_PSEAE	sp|Q9HVW7|MURA_PSEAE	1	1	1	>sp|Q9HVW7|MURA_PSEAE UDP-N-acetylglucosamine 1-carboxyvinyltransferase OS=Pseudomonas aeruginosa (strain ATCC 15692 / PAO1 / 1C / PRS 101 / LMG 12228) GN=murA PE=1 SV=1	1	1	1	1	2.4	2.4	2.4	44.645	421	421	1	-2	0	1	+			91	516	TRUE	544	877	1092	1092	64	60
sp|Q9HVY3|RS9_PSEAE	sp|Q9HVY3|RS9_PSEAE	1	1	1	>sp|Q9HVY3|RS9_PSEAE 30S ribosomal protein S9 OS=Pseudomonas aeruginosa (strain ATCC 15692 / PAO1 / 1C / PRS 101 / LMG 12228) GN=rpsI PE=3 SV=1	1	1	1	1	7.7	7.7	7.7	14.615	130	130	0	7.8088	5591800	3				92	68	TRUE	69	113;114	146;147;148	146
sp|Q9HW02|MURC_PSEAE	sp|Q9HW02|MURC_PSEAE	1	1	1	>sp|Q9HW02|MURC_PSEAE UDP-N-acetylmuramate--L-alanine ligase OS=Pseudomonas aeruginosa (strain ATCC 15692 / PAO1 / 1C / PRS 101 / LMG 12228) GN=murC PE=3 SV=1	1	1	1	1	2.9	2.9	2.9	51.981	480	480	0	8.4211	2139200	2				93	465	TRUE	491	794;795	990;991	990
sp|Q9HW04|ARGJ_PSEAE	sp|Q9HW04|ARGJ_PSEAE	1	1	1	>sp|Q9HW04|ARGJ_PSEAE Arginine biosynthesis bifunctional protein ArgJ OS=Pseudomonas aeruginosa (strain ATCC 15692 / PAO1 / 1C / PRS 101 / LMG 12228) GN=argJ PE=3 SV=1	1	1	1	1	2.7	2.7	2.7	41.762	405	405	0	8.1431	3792700	2				94	707	TRUE	749	1274;1275	1618;1619	1619
sp|Q9HW11|Y4395_PSEAE	sp|Q9HW11|Y4395_PSEAE	1	1	1	>sp|Q9HW11|Y4395_PSEAE UPF0234 protein PA4395 OS=Pseudomonas aeruginosa (strain ATCC 15692 / PAO1 / 1C / PRS 101 / LMG 12228) GN=PA4395 PE=3 SV=1	1	1	1	1	6.9	6.9	6.9	18.044	159	159	0	7.1122	3194600	2				95	774	TRUE	818	1393;1394	1761;1762	1761
sp|Q9HWC5|RL11_PSEAE	sp|Q9HWC5|RL11_PSEAE	1	1	1	>sp|Q9HWC5|RL11_PSEAE 50S ribosomal protein L11 OS=Pseudomonas aeruginosa (strain ATCC 15692 / PAO1 / 1C / PRS 101 / LMG 12228) GN=rplK PE=3 SV=1	1	1	1	1	9.8	9.8	9.8	14.907	143	143	0	7.7069	2386700	1				96	585	TRUE	623	1049	1325	1325
sp|Q9HWC7|RL10_PSEAE	sp|Q9HWC7|RL10_PSEAE	3	3	3	>sp|Q9HWC7|RL10_PSEAE 50S ribosomal protein L10 OS=Pseudomonas aeruginosa (strain ATCC 15692 / PAO1 / 1C / PRS 101 / LMG 12228) GN=rplJ PE=3 SV=1	1	3	3	3	25.9	25.9	25.9	17.634	166	166	0	35.86	25907000	10				97	56;107;275	True;True;True	57;111;291	93;94;189;190;477;478;479	120;121;247;248;249;250;251;604;605;606	120;251;605
sp|Q9HWC8|RL7_PSEAE	sp|Q9HWC8|RL7_PSEAE	1	1	1	>sp|Q9HWC8|RL7_PSEAE 50S ribosomal protein L7/L12 OS=Pseudomonas aeruginosa (strain ATCC 15692 / PAO1 / 1C / PRS 101 / LMG 12228) GN=rplL PE=3 SV=1	1	1	1	1	9	9	9	12.479	122	122	0	6.3203	28165000	2				98	110	TRUE	114	193;194	254;255	254
sp|Q9HWC9|RPOC_PSEAE	sp|Q9HWC9|RPOC_PSEAE	15	15	15	>sp|Q9HWC9|RPOC_PSEAE DNA-directed RNA polymerase subunit beta OS=Pseudomonas aeruginosa (strain ATCC 15692 / PAO1 / 1C / PRS 101 / LMG 12228) GN=rpoC PE=3 SV=1	1	15	15	15	12.8	12.8	12.8	154.38	1399	1399	0	120.48	81117000	27				99	16;204;244;246;294;327;441;454;487;502;569;617;760;784;833	True;True;True;True;True;True;True;True;True;True;True;True;True;True;True	16;218;260;262;310;346;465;478;513;528;607;656;804;828;877	26;362;363;427;429;430;431;510;559;748;749;776;777;830;831;854;1024;1025;1104;1105;1366;1367;1411;1412;1489	34;460;461;537;539;540;541;542;639;695;935;936;937;968;969;1036;1037;1067;1295;1296;1297;1401;1402;1727;1728;1786;1787;1898	34;460;537;540;639;695;935;969;1037;1067;1295;1401;1728;1786;1898	65;66	29;525
sp|Q9HWD1|RS7_PSEAE	sp|Q9HWD1|RS7_PSEAE	1	1	1	>sp|Q9HWD1|RS7_PSEAE 30S ribosomal protein S7 OS=Pseudomonas aeruginosa (strain ATCC 15692 / PAO1 / 1C / PRS 101 / LMG 12228) GN=rpsG PE=3 SV=1	1	1	1	1	7.7	7.7	7.7	17.504	156	156	0	6.4154	7111000	2				100	405	TRUE	428	695;696	869;870	870
sp|Q9HWD2|EFG1_PSEAE;sp|Q9I244|EFG2_PSEAE	sp|Q9HWD2|EFG1_PSEAE	16;5	16;5	16;5	>sp|Q9HWD2|EFG1_PSEAE Elongation factor G 1 OS=Pseudomonas aeruginosa (strain ATCC 15692 / PAO1 / 1C / PRS 101 / LMG 12228) GN=fusA PE=1 SV=1	2	16	16	16	30	30	30	77.784	706	706;702	0	159.69	183070000	44				101	32;41;100;175;228;270;287;307;411;438;513;548;755;804;812;835	True;True;True;True;True;True;True;True;True;True;True;True;True;True;True;True	32;41;42;102;186;244;286;303;323;434;461;462;539;540;582;799;848;856;879	49;50;66;67;68;69;170;305;306;401;402;472;495;496;526;527;703;704;741;742;743;744;869;870;871;971;972;1357;1444;1455;1456;1492;1493	63;64;65;66;67;87;88;89;90;222;395;396;507;508;598;599;623;624;655;656;879;880;923;924;925;926;927;928;929;930;1083;1084;1085;1086;1233;1234;1717;1718;1826;1840;1841;1842;1843;1902;1903	66;89;222;395;507;599;623;656;879;923;1083;1234;1718;1826;1843;1903	67;68;69;70;71	53;388;409;648;685
sp|Q9HWD5|RL3_PSEAE	sp|Q9HWD5|RL3_PSEAE	2	2	2	>sp|Q9HWD5|RL3_PSEAE 50S ribosomal protein L3 OS=Pseudomonas aeruginosa (strain ATCC 15692 / PAO1 / 1C / PRS 101 / LMG 12228) GN=rplC PE=3 SV=1	1	2	2	2	13.3	13.3	13.3	22.591	211	211	0	18.409	21408000	4				102	236;792	True;True	252;836	415;416;1425;1426	523;524;1805;1806	524;1805
sp|Q9HWD8|RL2_PSEAE	sp|Q9HWD8|RL2_PSEAE	4	4	4	>sp|Q9HWD8|RL2_PSEAE 50S ribosomal protein L2 OS=Pseudomonas aeruginosa (strain ATCC 15692 / PAO1 / 1C / PRS 101 / LMG 12228) GN=rplB PE=3 SV=1	1	4	4	4	21.6	21.6	21.6	29.579	273	273	0	36.776	38493000	7				103	102;284;285;610	True;True;True;True	104;300;301;649	173;174;175;176;490;491;492;1093	228;229;230;231;618;619;620;1389	231;619;620;1389
sp|Q9HWE0|RL22_PSEAE	sp|Q9HWE0|RL22_PSEAE	1	1	1	>sp|Q9HWE0|RL22_PSEAE 50S ribosomal protein L22 OS=Pseudomonas aeruginosa (strain ATCC 15692 / PAO1 / 1C / PRS 101 / LMG 12228) GN=rplV PE=3 SV=1	1	1	1	1	11.8	11.8	11.8	11.911	110	110	0	10.518	2206800	1				104	732	TRUE	776	1321	1677	1677
sp|Q9HWE1|RS3_PSEAE	sp|Q9HWE1|RS3_PSEAE	1	1	1	>sp|Q9HWE1|RS3_PSEAE 30S ribosomal protein S3 OS=Pseudomonas aeruginosa (strain ATCC 15692 / PAO1 / 1C / PRS 101 / LMG 12228) GN=rpsC PE=3 SV=1	1	1	1	1	4.8	4.8	4.8	25.838	228	228	0	8.9752	1574400	2				105	575	TRUE	613	1035;1036	1309;1310;1311	1310
sp|Q9HWE2|RL16_PSEAE	sp|Q9HWE2|RL16_PSEAE	1	1	1	>sp|Q9HWE2|RL16_PSEAE 50S ribosomal protein L16 OS=Pseudomonas aeruginosa (strain ATCC 15692 / PAO1 / 1C / PRS 101 / LMG 12228) GN=rplP PE=3 SV=1	1	1	1	1	6.6	6.6	6.6	15.401	137	137	0.0080645	5.4411	1854900	1				106	783	TRUE	827	1410	1785	1785
sp|Q9HWE4|RS17_PSEAE	sp|Q9HWE4|RS17_PSEAE	2	2	2	>sp|Q9HWE4|RS17_PSEAE 30S ribosomal protein S17 OS=Pseudomonas aeruginosa (strain ATCC 15692 / PAO1 / 1C / PRS 101 / LMG 12228) GN=rpsQ PE=3 SV=1	1	2	2	2	20.5	20.5	20.5	10.086	88	88	0	12.581	4257600	2				107	112;694	True;True	116;735	196;197;1255	257;258;1599	257;1599
sp|Q9HWE5|RL14_PSEAE	sp|Q9HWE5|RL14_PSEAE	2	2	2	>sp|Q9HWE5|RL14_PSEAE 50S ribosomal protein L14 OS=Pseudomonas aeruginosa (strain ATCC 15692 / PAO1 / 1C / PRS 101 / LMG 12228) GN=rplN PE=3 SV=1	1	2	2	2	17.2	17.2	17.2	13.412	122	122	0	13.507	19972000	4				108	206;813	True;True	220;857	366;367;1457;1458	464;465;1844;1845	464;1844
sp|Q9HWE6|RL24_PSEAE	sp|Q9HWE6|RL24_PSEAE	1	1	1	>sp|Q9HWE6|RL24_PSEAE 50S ribosomal protein L24 OS=Pseudomonas aeruginosa (strain ATCC 15692 / PAO1 / 1C / PRS 101 / LMG 12228) GN=rplX PE=3 SV=1	1	1	1	1	9.6	9.6	9.6	11.47	104	104	0	7.3556	10741000	2				109	506	TRUE	532	859;860	1072;1073	1073
sp|Q9HWE8|RS14_PSEAE	sp|Q9HWE8|RS14_PSEAE	2	2	2	>sp|Q9HWE8|RS14_PSEAE 30S ribosomal protein S14 OS=Pseudomonas aeruginosa (strain ATCC 15692 / PAO1 / 1C / PRS 101 / LMG 12228) GN=rpsN PE=3 SV=1	1	2	2	2	21.8	21.8	21.8	11.565	101	101	0	13.676	11267000	3				110	53;808	True;True	54;852	88;89;1449	115;116;1834	115;1834
sp|Q9HWE9|RS8_PSEAE	sp|Q9HWE9|RS8_PSEAE	2	2	2	>sp|Q9HWE9|RS8_PSEAE 30S ribosomal protein S8 OS=Pseudomonas aeruginosa (strain ATCC 15692 / PAO1 / 1C / PRS 101 / LMG 12228) GN=rpsH PE=3 SV=1	1	2	2	2	19.2	19.2	19.2	14.17	130	130	0	13.794	15154000	3				111	256;826	True;True	272;870	448;1482	563;1890;1891	563;1890
sp|Q9HWF0|RL6_PSEAE	sp|Q9HWF0|RL6_PSEAE	3	3	3	>sp|Q9HWF0|RL6_PSEAE 50S ribosomal protein L6 OS=Pseudomonas aeruginosa (strain ATCC 15692 / PAO1 / 1C / PRS 101 / LMG 12228) GN=rplF PE=3 SV=1	1	3	3	3	19.2	19.2	19.2	19.099	177	177	0	18.293	10702000	2				112	391;406;737	True;True;True	413;429;781	673;697;1328;1329	838;871;1685;1686	838;871;1685
sp|Q9HWF1|RL18_PSEAE	sp|Q9HWF1|RL18_PSEAE	1	1	1	>sp|Q9HWF1|RL18_PSEAE 50S ribosomal protein L18 OS=Pseudomonas aeruginosa (strain ATCC 15692 / PAO1 / 1C / PRS 101 / LMG 12228) GN=rplR PE=3 SV=1	1	1	1	1	8.6	8.6	8.6	12.661	116	116	0	6.0782	3023700	2				113	750	TRUE	794	1349;1350	1706;1707	1706
sp|Q9HWF2|RS5_PSEAE	sp|Q9HWF2|RS5_PSEAE	2	2	2	>sp|Q9HWF2|RS5_PSEAE 30S ribosomal protein S5 OS=Pseudomonas aeruginosa (strain ATCC 15692 / PAO1 / 1C / PRS 101 / LMG 12228) GN=rpsE PE=3 SV=1	1	2	2	2	19.9	19.9	19.9	17.625	166	166	0	18.55	5691300	2				114	108;803	True;True	112;847	191;1443	252;1825	252;1825	72	97
sp|Q9HWF3|RL30_PSEAE	sp|Q9HWF3|RL30_PSEAE	1	1	1	>sp|Q9HWF3|RL30_PSEAE 50S ribosomal protein L30 OS=Pseudomonas aeruginosa (strain ATCC 15692 / PAO1 / 1C / PRS 101 / LMG 12228) GN=rpmD PE=1 SV=3	1	1	1	1	24.1	24.1	24.1	6.4775	58	58	0	7.0017	1490000	2				115	355	TRUE	377	612;613	768;769	769
sp|Q9HWF4|RL15_PSEAE	sp|Q9HWF4|RL15_PSEAE	3	3	3	>sp|Q9HWF4|RL15_PSEAE 50S ribosomal protein L15 OS=Pseudomonas aeruginosa (strain ATCC 15692 / PAO1 / 1C / PRS 101 / LMG 12228) GN=rplO PE=3 SV=1	1	3	3	3	22.2	22.2	22.2	15.174	144	144	0	25.09	18175000	8				116	125;718;763	True;True;True	129;761;807	217;218;219;1295;1296;1371;1372	282;283;284;285;1648;1649;1732;1733	282;1648;1732	73	111
sp|Q9HWF7|RS13_PSEAE	sp|Q9HWF7|RS13_PSEAE	1	1	1	>sp|Q9HWF7|RS13_PSEAE 30S ribosomal protein S13 OS=Pseudomonas aeruginosa (strain ATCC 15692 / PAO1 / 1C / PRS 101 / LMG 12228) GN=rpsM PE=3 SV=1	1	1	1	1	11	11	11	13.265	118	118	0	12.595	5637000	2				117	343	TRUE	363	587;588	739;740	740
sp|Q9HWF9|BFR_PSEAE	sp|Q9HWF9|BFR_PSEAE	1	1	1	>sp|Q9HWF9|BFR_PSEAE Bacterioferritin OS=Pseudomonas aeruginosa (strain ATCC 15692 / PAO1 / 1C / PRS 101 / LMG 12228) GN=bfr PE=1 SV=1	1	1	1	1	5.8	5.8	5.8	17.94	154	154	0	6.1757	1798500	1				118	350	TRUE	371	604	760	760
sp|Q9HX33|SYL_PSEAE	sp|Q9HX33|SYL_PSEAE	2	2	2	>sp|Q9HX33|SYL_PSEAE Leucine--tRNA ligase OS=Pseudomonas aeruginosa (strain ATCC 15692 / PAO1 / 1C / PRS 101 / LMG 12228) GN=leuS PE=3 SV=1	1	2	2	2	3.4	3.4	3.4	97.647	873	873	0	14.591	5894200	2				119	262;576	True;True	278;614	459;460;1037	583;584;1312	584;1312	74	68
sp|Q9HXM6|GUAA_PSEAE	sp|Q9HXM6|GUAA_PSEAE	3	3	3	>sp|Q9HXM6|GUAA_PSEAE GMP synthase [glutamine-hydrolyzing] OS=Pseudomonas aeruginosa (strain ATCC 15692 / PAO1 / 1C / PRS 101 / LMG 12228) GN=guaA PE=3 SV=1	1	3	3	3	5.9	5.9	5.9	57.959	525	525	0	20.271	9210300	4				120	84;407;660	True;True;True	85;430;700	139;140;698;1193	181;182;872;1521	182;872;1521
sp|Q9HXN2|PUR4_PSEAE	sp|Q9HXN2|PUR4_PSEAE	1	1	1	>sp|Q9HXN2|PUR4_PSEAE Phosphoribosylformylglycinamidine synthase OS=Pseudomonas aeruginosa (strain ATCC 15692 / PAO1 / 1C / PRS 101 / LMG 12228) GN=purL PE=3 SV=1	1	1	1	1	1.1	1.1	1.1	140.65	1298	1298	0	8.93	1237300	1				121	787	TRUE	831	1415	1790	1790
sp|Q9HXQ2|RL19_PSEAE	sp|Q9HXQ2|RL19_PSEAE	3	3	3	>sp|Q9HXQ2|RL19_PSEAE 50S ribosomal protein L19 OS=Pseudomonas aeruginosa (strain ATCC 15692 / PAO1 / 1C / PRS 101 / LMG 12228) GN=rplS PE=3 SV=1	1	3	3	3	32.8	32.8	32.8	13.032	116	116	0	35.662	8193300	4				122	340;483;661	True;True;True	359;509;701	578;824;825;1194	718;719;1030;1031;1522	719;1030;1522	75	14
sp|Q9HXZ2|ACCA_PSEAE	sp|Q9HXZ2|ACCA_PSEAE	1	1	1	>sp|Q9HXZ2|ACCA_PSEAE Acetyl-coenzyme A carboxylase carboxyl transferase subunit alpha OS=Pseudomonas aeruginosa (strain ATCC 15692 / PAO1 / 1C / PRS 101 / LMG 12228) GN=accA PE=1 SV=1	1	1	1	1	5.1	5.1	5.1	34.947	316	316	0	10.226	3182400	1				123	500	TRUE	526	851	1064	1064
sp|Q9HXZ4|PYRG_PSEAE	sp|Q9HXZ4|PYRG_PSEAE	2	2	2	>sp|Q9HXZ4|PYRG_PSEAE CTP synthase OS=Pseudomonas aeruginosa (strain ATCC 15692 / PAO1 / 1C / PRS 101 / LMG 12228) GN=pyrG PE=3 SV=1	1	2	2	2	5.9	5.9	5.9	59.617	542	542	0	11.483	4475300	2				124	133;364	True;True	137;386	230;626	299;783	299;783
sp|Q9HXZ5|ENO_PSEAE	sp|Q9HXZ5|ENO_PSEAE	4	4	4	>sp|Q9HXZ5|ENO_PSEAE Enolase OS=Pseudomonas aeruginosa (strain ATCC 15692 / PAO1 / 1C / PRS 101 / LMG 12228) GN=eno PE=3 SV=1	1	4	4	4	10.3	10.3	10.3	45.195	429	429	0	28.451	20719000	5				125	4;105;267;778	True;True;True;True	4;109;283;822	8;185;186;467;1402	8;243;244;592;1774	8;244;592;1774
sp|Q9HYR9|CLPP2_PSEAE	sp|Q9HYR9|CLPP2_PSEAE	1	1	1	>sp|Q9HYR9|CLPP2_PSEAE ATP-dependent Clp protease proteolytic subunit 2 OS=Pseudomonas aeruginosa (strain ATCC 15692 / PAO1 / 1C / PRS 101 / LMG 12228) GN=clpP2 PE=3 SV=1	1	1	1	1	6	6	6	22.142	201	201	0	11.569	1024600	1				126	319	TRUE	336	545	680	680
sp|Q9HZ71|RS1_PSEAE	sp|Q9HZ71|RS1_PSEAE	6	6	6	>sp|Q9HZ71|RS1_PSEAE 30S ribosomal protein S1 OS=Pseudomonas aeruginosa (strain ATCC 15692 / PAO1 / 1C / PRS 101 / LMG 12228) GN=rpsA PE=3 SV=1	1	6	6	6	16.5	16.5	16.5	61.869	559	559	0	69.272	46329000	10				127	167;346;393;636;649;730	True;True;True;True;True;True	178;367;416;675;689;774	293;294;598;676;677;1133;1134;1175;1176;1317;1318	382;383;751;752;841;842;1438;1439;1440;1493;1494;1673;1674	382;752;842;1440;1493;1673
sp|Q9HZ76|WBPE_PSEAE	sp|Q9HZ76|WBPE_PSEAE	1	1	1	>sp|Q9HZ76|WBPE_PSEAE UDP-2-acetamido-2-deoxy-3-oxo-D-glucuronate aminotransferase OS=Pseudomonas aeruginosa (strain ATCC 15692 / PAO1 / 1C / PRS 101 / LMG 12228) GN=wbpE PE=1 SV=1	1	1	1	1	3.3	3.3	3.3	38.924	359	359	0	6.0795	1064100	0				128	419	TRUE	442	714	895	895
sp|Q9HZE0|DHE2_PSEAE	sp|Q9HZE0|DHE2_PSEAE	17	17	17	>sp|Q9HZE0|DHE2_PSEAE NAD-specific glutamate dehydrogenase OS=Pseudomonas aeruginosa (strain ATCC 15692 / PAO1 / 1C / PRS 101 / LMG 12228) GN=gdhB PE=1 SV=1	1	17	17	17	12.4	12.4	12.4	182.64	1620	1620	0	120.01	83747000	26				129	15;54;64;158;183;283;292;351;452;469;504;543;734;738;756;790;842	True;True;True;True;True;True;True;True;True;True;True;True;True;True;True;True;True	15;55;65;167;195;299;308;372;476;495;530;577;778;782;800;834;886	24;25;90;91;107;108;277;323;324;489;505;605;773;802;803;856;964;1324;1330;1358;1359;1420;1421;1504	32;33;117;118;139;140;355;356;414;415;617;633;761;965;1000;1001;1002;1069;1225;1680;1681;1687;1719;1720;1800;1801;1915	32;118;139;356;414;617;633;761;965;1000;1069;1225;1681;1687;1720;1800;1915	76;77	195;1192
sp|Q9HZP5|ETFD_PSEAE	sp|Q9HZP5|ETFD_PSEAE	1	1	1	>sp|Q9HZP5|ETFD_PSEAE Electron transfer flavoprotein-ubiquinone oxidoreductase OS=Pseudomonas aeruginosa (strain ATCC 15692 / PAO1 / 1C / PRS 101 / LMG 12228) GN=PA2953 PE=1 SV=1	1	1	1	1	1.8	1.8	1.8	59.928	551	551	0.0044248	5.6838	0	1				130	71	TRUE	72	119	154	154
sp|Q9HZP6|ETFB_PSEAE	sp|Q9HZP6|ETFB_PSEAE	1	1	1	>sp|Q9HZP6|ETFB_PSEAE Electron transfer flavoprotein subunit beta OS=Pseudomonas aeruginosa (strain ATCC 15692 / PAO1 / 1C / PRS 101 / LMG 12228) GN=etfB PE=3 SV=1	1	1	1	1	4.8	4.8	4.8	26.376	249	249	0	6.0337	901940	0				131	723	TRUE	766	1306	1660	1660
sp|Q9HZZ2|EFP_PSEAE	sp|Q9HZZ2|EFP_PSEAE	3	3	3	>sp|Q9HZZ2|EFP_PSEAE Elongation factor P OS=Pseudomonas aeruginosa (strain ATCC 15692 / PAO1 / 1C / PRS 101 / LMG 12228) GN=efp PE=1 SV=1	1	3	3	3	18.1	18.1	18.1	20.985	188	188	0	17.499	21057000	2				132	14;592;742	True;True;True	14;630;786	23;1061;1337;1338	31;1341;1694;1695	31;1341;1695
sp|Q9I0A4|SYFB_PSEAE	sp|Q9I0A4|SYFB_PSEAE	1	1	1	>sp|Q9I0A4|SYFB_PSEAE Phenylalanine--tRNA ligase beta subunit OS=Pseudomonas aeruginosa (strain ATCC 15692 / PAO1 / 1C / PRS 101 / LMG 12228) GN=pheT PE=1 SV=1	1	1	1	1	1.5	1.5	1.5	86.799	792	792	0.0046296	5.811	568150	0				133	503	TRUE	529	855	1068	1068
sp|Q9I0J6|NUOG_PSEAE	sp|Q9I0J6|NUOG_PSEAE	1	1	1	>sp|Q9I0J6|NUOG_PSEAE NADH-quinone oxidoreductase subunit G OS=Pseudomonas aeruginosa (strain ATCC 15692 / PAO1 / 1C / PRS 101 / LMG 12228) GN=nuoG PE=3 SV=1	1	1	1	1	1.7	1.7	1.7	98.999	905	905	0.0045872	5.7414	301150	1				134	799	TRUE	843	1435	1817	1817
sp|Q9I0J9|NUOCD_PSEAE	sp|Q9I0J9|NUOCD_PSEAE	2	2	2	>sp|Q9I0J9|NUOCD_PSEAE NADH-quinone oxidoreductase subunit C/D OS=Pseudomonas aeruginosa (strain ATCC 15692 / PAO1 / 1C / PRS 101 / LMG 12228) GN=nuoC PE=3 SV=1	1	2	2	2	3.2	3.2	3.2	68.322	593	593	0	11.788	3617500	2				135	325;796	True;True	343;840	555;1432	690;1813	690;1813
sp|Q9I0K4|ACEA_PSEAE	sp|Q9I0K4|ACEA_PSEAE	5	5	5	>sp|Q9I0K4|ACEA_PSEAE Isocitrate lyase OS=Pseudomonas aeruginosa (strain ATCC 15692 / PAO1 / 1C / PRS 101 / LMG 12228) GN=PA2634 PE=1 SV=1	1	5	5	5	10.9	10.9	10.9	58.886	531	531	0	35.157	17362000	6				136	413;464;547;657;791	True;True;True;True;True	436;489;490;581;697;835	707;792;793;970;1189;1422;1423;1424	886;987;988;989;1232;1515;1802;1803;1804	886;988;1232;1515;1803	78	415
sp|Q9I137|GCSP1_PSEAE	sp|Q9I137|GCSP1_PSEAE	2	2	2	>sp|Q9I137|GCSP1_PSEAE Glycine dehydrogenase (decarboxylating) 1 OS=Pseudomonas aeruginosa (strain ATCC 15692 / PAO1 / 1C / PRS 101 / LMG 12228) GN=gcvP1 PE=3 SV=1	1	2	2	2	1.9	1.9	1.9	103.92	959	959	0	11.848	5384400	1				137	245;482	True;True	261;508	428;823	538;1029	538;1029
sp|Q9I1L9|DLDH1_PSEAE	sp|Q9I1L9|DLDH1_PSEAE	1	1	1	>sp|Q9I1L9|DLDH1_PSEAE Dihydrolipoyl dehydrogenase OS=Pseudomonas aeruginosa (strain ATCC 15692 / PAO1 / 1C / PRS 101 / LMG 12228) GN=lpdV PE=1 SV=1	1	1	1	1	2.4	2.4	2.4	48.588	464	464	0.0044444	5.688	4168700	3				138	69	TRUE	70	115;116	149;150;151	151
sp|Q9I1M0|ODB2_PSEAE	sp|Q9I1M0|ODB2_PSEAE	1	1	1	>sp|Q9I1M0|ODB2_PSEAE Lipoamide acyltransferase component of branched-chain alpha-keto acid dehydrogenase complex OS=Pseudomonas aeruginosa (strain ATCC 15692 / PAO1 / 1C / PRS 101 / LMG 12228) GN=bkdB PE=1 SV=1	1	1	1	1	7	7	7	45.774	428	428	0	16.998	1835400	1				139	430	TRUE	453	730	911	911
sp|Q9I2A8|ATOB_PSEAE	sp|Q9I2A8|ATOB_PSEAE	4	4	4	>sp|Q9I2A8|ATOB_PSEAE Acetyl-CoA acetyltransferase OS=Pseudomonas aeruginosa (strain ATCC 15692 / PAO1 / 1C / PRS 101 / LMG 12228) GN=atoB PE=3 SV=1	1	4	4	4	13	13	13	40.405	393	393	0	25.261	10445000	4				140	48;174;227;762	True;True;True;True	49;185;243;806	78;303;304;400;1370	102;103;393;394;506;1731	102;393;506;1731	79	82
sp|Q9I2U0|CLPX_PSEAE	sp|Q9I2U0|CLPX_PSEAE	2	2	2	>sp|Q9I2U0|CLPX_PSEAE ATP-dependent Clp protease ATP-binding subunit ClpX OS=Pseudomonas aeruginosa (strain ATCC 15692 / PAO1 / 1C / PRS 101 / LMG 12228) GN=clpX PE=3 SV=1	1	2	2	2	4.5	4.5	4.5	46.991	426	426	0	11.918	2288300	2				141	212;671	True;True	227;711	377;1212	476;1542	476;1542
sp|Q9I2U8|SYQ_PSEAE	sp|Q9I2U8|SYQ_PSEAE	1	1	1	>sp|Q9I2U8|SYQ_PSEAE Glutamine--tRNA ligase OS=Pseudomonas aeruginosa (strain ATCC 15692 / PAO1 / 1C / PRS 101 / LMG 12228) GN=glnS PE=1 SV=1	1	1	1	1	2	2	2	62.912	556	556	0.0046083	5.7982	289180	2				142	312	TRUE	328	533;534	662;663	662	80;81	180;185
sp|Q9I2V5|ACNB_PSEAE	sp|Q9I2V5|ACNB_PSEAE	15	15	15	>sp|Q9I2V5|ACNB_PSEAE Aconitate hydratase B OS=Pseudomonas aeruginosa (strain ATCC 15692 / PAO1 / 1C / PRS 101 / LMG 12228) GN=acnB PE=3 SV=1	1	15	15	15	20.9	20.9	20.9	93.627	869	869	0	113.91	123530000	26				143	28;47;134;264;298;362;477;481;496;520;530;683;772;779;838	True;True;True;True;True;True;True;True;True;True;True;True;True;True;True	28;48;138;280;314;384;503;507;522;548;561;723;816;823;882	43;44;76;77;231;232;462;463;514;624;816;817;821;822;844;881;899;900;1234;1235;1390;1403;1404;1497;1498	56;57;100;101;300;301;586;587;588;643;781;1021;1022;1027;1028;1054;1096;1120;1121;1574;1575;1757;1758;1775;1776;1907;1908;1909	56;100;300;586;643;781;1021;1027;1054;1096;1121;1574;1757;1775;1907	82	423
sp|Q9I3C5|HTPG_PSEAE	sp|Q9I3C5|HTPG_PSEAE	2	2	2	>sp|Q9I3C5|HTPG_PSEAE Chaperone protein HtpG OS=Pseudomonas aeruginosa (strain ATCC 15692 / PAO1 / 1C / PRS 101 / LMG 12228) GN=htpG PE=3 SV=1	1	2	2	2	3.5	3.5	3.5	71.667	634	634	0	14.593	3312700	2				144	172;753	True;True	183;797	301;1355	391;1715	391;1715
sp|Q9I3D1|DLDH2_PSEAE	sp|Q9I3D1|DLDH2_PSEAE	8	8	8	>sp|Q9I3D1|DLDH2_PSEAE Dihydrolipoyl dehydrogenase OS=Pseudomonas aeruginosa (strain ATCC 15692 / PAO1 / 1C / PRS 101 / LMG 12228) GN=lpdG PE=3 SV=1	1	8	8	8	22.8	22.8	22.8	50.164	478	478	0	75.565	67485000	16				145	23;93;222;288;434;559;605;689	True;True;True;True;True;True;True;True	23;94;95;237;304;457;593;644;730	38;156;157;158;159;392;497;498;736;737;1000;1001;1083;1244;1245	51;203;204;205;206;207;497;625;626;918;919;1268;1269;1374;1587;1588;1589	51;203;497;626;918;1269;1374;1589	83;84	91;336
sp|Q9I3F5|ACNA_PSEAE	sp|Q9I3F5|ACNA_PSEAE	6	6	6	>sp|Q9I3F5|ACNA_PSEAE Aconitate hydratase A OS=Pseudomonas aeruginosa (strain ATCC 15692 / PAO1 / 1C / PRS 101 / LMG 12228) GN=acnA PE=3 SV=1	1	6	6	6	9.6	9.6	9.6	99.147	910	910	0	45.29	35847000	9				146	315;357;459;697;758;841	True;True;True;True;True;True	331;379;483;738;802;885	537;616;617;783;1258;1362;1363;1502;1503	667;772;773;976;1602;1723;1724;1913;1914	667;772;976;1602;1723;1913
sp|Q9I3I0|Y1533_PSEAE	sp|Q9I3I0|Y1533_PSEAE	1	1	1	>sp|Q9I3I0|Y1533_PSEAE Nucleoid-associated protein PA1533 OS=Pseudomonas aeruginosa (strain ATCC 15692 / PAO1 / 1C / PRS 101 / LMG 12228) GN=PA1533 PE=3 SV=1	1	1	1	1	17.6	17.6	17.6	11.877	108	108	0.0043478	5.5931	0	1				147	257	TRUE	273	449	564	564	85;86	6;20
sp|Q9I4G3|NAPA_PSEAE	sp|Q9I4G3|NAPA_PSEAE	1	1	1	>sp|Q9I4G3|NAPA_PSEAE Periplasmic nitrate reductase OS=Pseudomonas aeruginosa (strain ATCC 15692 / PAO1 / 1C / PRS 101 / LMG 12228) GN=napA PE=3 SV=1	1	1	1	1	1.3	1.3	1.3	92.974	829	829	0	6.9229	1879600	1				148	474	TRUE	500	811	1014	1014
sp|Q9I4W0|PUR7_PSEAE	sp|Q9I4W0|PUR7_PSEAE	1	1	1	>sp|Q9I4W0|PUR7_PSEAE Phosphoribosylaminoimidazole-succinocarboxamide synthase OS=Pseudomonas aeruginosa (strain ATCC 15692 / PAO1 / 1C / PRS 101 / LMG 12228) GN=purC PE=3 SV=1	1	1	1	1	5.1	5.1	5.1	26.83	236	236	0	7.873	3861100	1				149	421	TRUE	444	717	898	898
sp|Q9I4W3|DAPA_PSEAE	sp|Q9I4W3|DAPA_PSEAE	2	2	2	>sp|Q9I4W3|DAPA_PSEAE 4-hydroxy-tetrahydrodipicolinate synthase OS=Pseudomonas aeruginosa (strain ATCC 15692 / PAO1 / 1C / PRS 101 / LMG 12228) GN=dapA PE=1 SV=1	1	2	2	2	8.6	8.6	8.6	31.449	292	292	0	12.626	1350600	2				150	65;365	True;True	66;387	109;627	141;784	141;784
sp|Q9I4Z4|PAL_PSEAE	sp|Q9I4Z4|PAL_PSEAE	1	1	1	>sp|Q9I4Z4|PAL_PSEAE Peptidoglycan-associated lipoprotein OS=Pseudomonas aeruginosa (strain ATCC 15692 / PAO1 / 1C / PRS 101 / LMG 12228) GN=pal PE=3 SV=1	1	1	1	1	10.1	10.1	10.1	17.925	168	168	0	9.181	5303900	2				151	191	TRUE	205	342;343	439;440	440
sp|Q9I502|SYP_PSEAE	sp|Q9I502|SYP_PSEAE	1	1	1	>sp|Q9I502|SYP_PSEAE Proline--tRNA ligase OS=Pseudomonas aeruginosa (strain ATCC 15692 / PAO1 / 1C / PRS 101 / LMG 12228) GN=proS PE=3 SV=1	1	1	1	1	2.3	2.3	2.3	63.103	571	571	0.0045662	5.7342	582550	3				152	793	TRUE	837	1427;1428	1807;1808;1809	1807
sp|Q9I513|PUR5_PSEAE	sp|Q9I513|PUR5_PSEAE	1	1	1	>sp|Q9I513|PUR5_PSEAE Phosphoribosylformylglycinamidine cyclo-ligase OS=Pseudomonas aeruginosa (strain ATCC 15692 / PAO1 / 1C / PRS 101 / LMG 12228) GN=purM PE=3 SV=1	1	1	1	1	3.1	3.1	3.1	37.122	353	353	0.0047393	5.9793	905670	1				153	3	TRUE	3	7	7	7
sp|Q9I558|ACSA1_PSEAE	sp|Q9I558|ACSA1_PSEAE	1	1	1	>sp|Q9I558|ACSA1_PSEAE Acetyl-coenzyme A synthetase 1 OS=Pseudomonas aeruginosa (strain ATCC 15692 / PAO1 / 1C / PRS 101 / LMG 12228) GN=acsA1 PE=3 SV=1	1	1	1	1	2.2	2.2	2.2	71.762	651	651	0.0045045	5.7058	4482600	2				154	701	TRUE	742	1263;1264	1607;1608	1607	87	550
sp|Q9I576|HPPD_PSEAE	sp|Q9I576|HPPD_PSEAE	2	2	2	>sp|Q9I576|HPPD_PSEAE 4-hydroxyphenylpyruvate dioxygenase OS=Pseudomonas aeruginosa (strain ATCC 15692 / PAO1 / 1C / PRS 101 / LMG 12228) GN=hpd PE=3 SV=1	1	2	2	2	7.6	7.6	7.6	39.912	357	357	0	36.399	6515900	4				155	542;703	True;True	576;744	962;963;1267	1222;1223;1224;1611	1222;1611
sp|Q9I589|CBPD_PSEAE	sp|Q9I589|CBPD_PSEAE	1	1	1	>sp|Q9I589|CBPD_PSEAE Chitin-binding protein CbpD OS=Pseudomonas aeruginosa (strain ATCC 15692 / PAO1 / 1C / PRS 101 / LMG 12228) GN=cbpD PE=1 SV=1	1	1	1	1	3.6	3.6	3.6	41.916	389	389	0	7.9317	6985700	3				156	90	TRUE	91	150;151	192;193;194	194
sp|Q9I5V8|RS21_PSEAE	sp|Q9I5V8|RS21_PSEAE	2	2	2	>sp|Q9I5V8|RS21_PSEAE 30S ribosomal protein S21 OS=Pseudomonas aeruginosa (strain ATCC 15692 / PAO1 / 1C / PRS 101 / LMG 12228) GN=rpsU PE=1 SV=3	1	2	2	2	31	31	31	8.4848	71	71	0	13.444	2680400	2				157	177;746	True;True	189;790	311;1344	401;1701	401;1701
sp|Q9I5Y1|ALF_PSEAE	sp|Q9I5Y1|ALF_PSEAE	3	3	3	>sp|Q9I5Y1|ALF_PSEAE Fructose-bisphosphate aldolase OS=Pseudomonas aeruginosa (strain ATCC 15692 / PAO1 / 1C / PRS 101 / LMG 12228) GN=fba PE=3 SV=1	1	3	3	3	11	11	11	38.573	354	354	0	21.264	9016500	7				158	192;215;818	True;True;True	206;230;862	344;345;381;382;1470	441;442;443;480;481;482;1868	443;482;1868
sp|Q9I5Y4|PGK_PSEAE	sp|Q9I5Y4|PGK_PSEAE	1	1	1	>sp|Q9I5Y4|PGK_PSEAE Phosphoglycerate kinase OS=Pseudomonas aeruginosa (strain ATCC 15692 / PAO1 / 1C / PRS 101 / LMG 12228) GN=pgk PE=3 SV=1	1	1	1	1	2.8	2.8	2.8	40.404	387	387	0	6.4376	1532600	1				159	43	TRUE	44	71	92	92
sp|Q9I5Z0|METK_PSEAE	sp|Q9I5Z0|METK_PSEAE	3	3	3	>sp|Q9I5Z0|METK_PSEAE S-adenosylmethionine synthase OS=Pseudomonas aeruginosa (strain ATCC 15692 / PAO1 / 1C / PRS 101 / LMG 12228) GN=metK PE=3 SV=1	1	3	3	3	8.1	8.1	8.1	42.709	396	396	0	18.371	5767400	2				160	135;342;621	True;True;True	139;362;660	233;586;1111	302;738;1410	302;738;1410	88;89	205;256
sp|Q9I685|SAHH_PSEAE	sp|Q9I685|SAHH_PSEAE	9	9	9	>sp|Q9I685|SAHH_PSEAE Adenosylhomocysteinase OS=Pseudomonas aeruginosa (strain ATCC 15692 / PAO1 / 1C / PRS 101 / LMG 12228) GN=ahcY PE=3 SV=1	1	9	9	9	24.3	24.3	24.3	51.399	469	469	0	82.679	73373000	13				161	247;334;389;505;546;612;699;768;811	True;True;True;True;True;True;True;True;True	263;353;411;531;580;651;740;812;855	432;568;569;669;857;858;969;1095;1261;1383;1384;1453;1454	543;707;708;832;1070;1071;1230;1231;1391;1605;1747;1748;1749;1750;1838;1839	543;707;832;1070;1230;1391;1605;1750;1838	90	5
sp|Q9I690|Y423_PSEAE	sp|Q9I690|Y423_PSEAE	1	1	1	>sp|Q9I690|Y423_PSEAE UPF0312 protein PA0423 OS=Pseudomonas aeruginosa (strain ATCC 15692 / PAO1 / 1C / PRS 101 / LMG 12228) GN=PA0423 PE=3 SV=1	1	1	1	1	7.9	7.9	7.9	20.776	191	191	0.0045455	5.725	2527000	1				162	788	TRUE	832	1416	1791	1791
sp|Q9I6M4|DAVT_PSEAE	sp|Q9I6M4|DAVT_PSEAE	3	3	3	>sp|Q9I6M4|DAVT_PSEAE 5-aminovalerate aminotransferase DavT OS=Pseudomonas aeruginosa (strain ATCC 15692 / PAO1 / 1C / PRS 101 / LMG 12228) GN=davT PE=1 SV=1	1	3	3	3	9.9	9.9	9.9	45.22	426	426	0	35.848	21621000	5				163	31;648;674	True;True;True	31;688;714	48;1173;1174;1217;1218	61;62;1491;1492;1553;1554	61;1491;1553
sp|Q9I6M5|DAVD_PSEAE	sp|Q9I6M5|DAVD_PSEAE	6	6	6	>sp|Q9I6M5|DAVD_PSEAE Glutarate-semialdehyde dehydrogenase DavD OS=Pseudomonas aeruginosa (strain ATCC 15692 / PAO1 / 1C / PRS 101 / LMG 12228) GN=davD PE=1 SV=1	1	6	6	6	15.7	15.7	15.7	51.622	483	483	0	46.017	23739000	5				164	131;386;510;717;766;829	True;True;True;True;True;True	135;408;536;760;810;873	227;664;665;866;1294;1379;1380;1485	295;296;826;827;1080;1647;1743;1744;1894	295;826;1080;1647;1743;1894
sp|Q9I747|HCP1_PSEAE	sp|Q9I747|HCP1_PSEAE	2	2	2	>sp|Q9I747|HCP1_PSEAE Protein hcp1 OS=Pseudomonas aeruginosa (strain ATCC 15692 / PAO1 / 1C / PRS 101 / LMG 12228) GN=hcp1 PE=1 SV=1	1	2	2	2	16.7	16.7	16.7	17.414	162	162	0	22.613	23721000	4				165	196;767	True;True	210;811	351;352;1381;1382	449;450;1745;1746	450;1746
sp|Q9I7C2|GYRB_PSEAE	sp|Q9I7C2|GYRB_PSEAE	1	1	1	>sp|Q9I7C2|GYRB_PSEAE DNA gyrase subunit B OS=Pseudomonas aeruginosa (strain ATCC 15692 / PAO1 / 1C / PRS 101 / LMG 12228) GN=gyrB PE=3 SV=1	1	1	1	1	1.7	1.7	1.7	90.188	806	806	0	6.3201	1232800	1				166	825	TRUE	869	1481	1889	1889
sp|Q9I7C4|DPO3B_PSEAE	sp|Q9I7C4|DPO3B_PSEAE	1	1	1	>sp|Q9I7C4|DPO3B_PSEAE DNA polymerase III subunit beta OS=Pseudomonas aeruginosa (strain ATCC 15692 / PAO1 / 1C / PRS 101 / LMG 12228) GN=dnaN PE=3 SV=1	1	1	1	1	5.2	5.2	5.2	40.694	367	367	0	8.9621	2478700	1				167	461	TRUE	485	786	979	979
sp|Q9LCT3|SECA_PSEAE	sp|Q9LCT3|SECA_PSEAE	1	1	1	>sp|Q9LCT3|SECA_PSEAE Protein translocase subunit SecA OS=Pseudomonas aeruginosa (strain ATCC 15692 / PAO1 / 1C / PRS 101 / LMG 12228) GN=secA PE=3 SV=1	1	1	1	1	1.4	1.4	1.4	103.85	916	916	0.0042373	5.5166	272570	1				168	67	TRUE	68	112	145	145	91	612
sp|Q9X2T1|THIO_PSEAE	sp|Q9X2T1|THIO_PSEAE	1	1	1	>sp|Q9X2T1|THIO_PSEAE Thioredoxin OS=Pseudomonas aeruginosa (strain ATCC 15692 / PAO1 / 1C / PRS 101 / LMG 12228) GN=trxA PE=3 SV=1	1	1	1	1	11.1	11.1	11.1	11.87	108	108	0	7.3658	8350100	4				169	471	TRUE	497	805;806	1005;1006;1007;1008	1005
tr|G3XCT6|G3XCT6_PSEAE	tr|G3XCT6|G3XCT6_PSEAE	1	1	1	>tr|G3XCT6|G3XCT6_PSEAE Probable two-component sensor OS=Pseudomonas aeruginosa (strain ATCC 15692 / PAO1 / 1C / PRS 101 / LMG 12228) GN=PA1458 PE=4 SV=1	1	1	1	1	2.3	2.3	2.3	79.737	753	753	0.0081633	5.4536	1672100	1				170	577	TRUE	615	1038	1313	1313
tr|G3XD11|G3XD11_PSEAE	tr|G3XD11|G3XD11_PSEAE	2	2	2	>tr|G3XD11|G3XD11_PSEAE PhoP/Q and low Mg2+ inducible outer membrane protein H1 OS=Pseudomonas aeruginosa (strain ATCC 15692 / PAO1 / 1C / PRS 101 / LMG 12228) GN=oprH PE=4 SV=1	1	2	2	2	11	11	11	21.574	200	200	0	15.018	19174000	2				171	432;740	True;True	455;784	732;733;1333;1334	914;915;1690;1691	915;1690
tr|Q9HTD1|Q9HTD1_PSEAE	tr|Q9HTD1|Q9HTD1_PSEAE	10	10	10	>tr|Q9HTD1|Q9HTD1_PSEAE Probable transcarboxylase subunit OS=Pseudomonas aeruginosa (strain ATCC 15692 / PAO1 / 1C / PRS 101 / LMG 12228) GN=PA5435 PE=4 SV=1	1	10	10	10	19.6	19.6	19.6	66.095	607	607	0	69.801	87228000	23				172	11;81;121;144;220;291;321;515;712;832	True;True;True;True;True;True;True;True;True;True	11;82;125;149;150;235;307;338;339;542;543;755;876	18;19;133;134;212;250;251;252;253;389;390;504;548;549;550;873;874;875;876;1285;1488	25;26;27;171;172;173;174;277;322;323;324;325;494;495;632;683;684;685;1088;1089;1090;1091;1633;1897	25;171;277;325;494;632;684;1088;1633;1897	92;93;94	125;182;323
tr|Q9HTD9|Q9HTD9_PSEAE	tr|Q9HTD9|Q9HTD9_PSEAE	5	5	5	>tr|Q9HTD9|Q9HTD9_PSEAE Alcohol dehydrogenase OS=Pseudomonas aeruginosa (strain ATCC 15692 / PAO1 / 1C / PRS 101 / LMG 12228) GN=adhA PE=1 SV=1	1	5	5	5	17.8	17.8	17.8	35.911	342	342	0	35.097	18259000	7				173	12;75;416;587;771	True;True;True;True;True	12;76;439;625;815	20;125;710;711;1052;1388;1389	28;161;889;890;891;892;1328;1755;1756	28;161;892;1328;1756
tr|Q9HTP2|Q9HTP2_PSEAE	tr|Q9HTP2|Q9HTP2_PSEAE	3	3	3	>tr|Q9HTP2|Q9HTP2_PSEAE Probable aldehyde dehydrogenase OS=Pseudomonas aeruginosa (strain ATCC 15692 / PAO1 / 1C / PRS 101 / LMG 12228) GN=PA5312 PE=3 SV=1	1	3	3	3	9.7	9.7	9.7	53.143	497	497	0	21.567	22666000	7				174	306;385;442	True;True;True	322;407;466	524;525;661;662;663;750	653;654;822;823;824;825;938	654;825;938
tr|Q9HU11|Q9HU11_PSEAE	tr|Q9HU11|Q9HU11_PSEAE	3	3	3	>tr|Q9HU11|Q9HU11_PSEAE Uncharacterized protein OS=Pseudomonas aeruginosa (strain ATCC 15692 / PAO1 / 1C / PRS 101 / LMG 12228) GN=PA5178 PE=4 SV=1	1	3	3	3	24.1	24.1	24.1	15.46	145	145	0	24.863	8297300	6				175	34;380;739	True;True;True	34;402;783	53;54;652;653;1331;1332	72;73;813;814;1688;1689	72;814;1689	95	119
tr|Q9HUC3|Q9HUC3_PSEAE	tr|Q9HUC3|Q9HUC3_PSEAE	1	1	1	>tr|Q9HUC3|Q9HUC3_PSEAE Polyhydroxyalkanoate synthesis protein PhaF OS=Pseudomonas aeruginosa (strain ATCC 15692 / PAO1 / 1C / PRS 101 / LMG 12228) GN=phaF PE=4 SV=1	1	1	1	1	3.6	3.6	3.6	30.577	309	309	0.0041322	5.4764	2694300	1				176	809	TRUE	853	1450	1835	1835
tr|Q9HUD3|Q9HUD3_PSEAE	tr|Q9HUD3|Q9HUD3_PSEAE	1	1	1	>tr|Q9HUD3|Q9HUD3_PSEAE Malic enzyme OS=Pseudomonas aeruginosa (strain ATCC 15692 / PAO1 / 1C / PRS 101 / LMG 12228) GN=PA5046 PE=3 SV=1	1	1	1	1	2.6	2.6	2.6	45.428	422	422	0	6.712	8992700	2				177	448	TRUE	472	764;765	954;955	954
tr|Q9HV54|Q9HV54_PSEAE	tr|Q9HV54|Q9HV54_PSEAE	1	1	1	>tr|Q9HV54|Q9HV54_PSEAE Transcription termination/antitermination protein NusA OS=Pseudomonas aeruginosa (strain ATCC 15692 / PAO1 / 1C / PRS 101 / LMG 12228) GN=nusA PE=3 SV=1	1	1	1	1	2.4	2.4	2.4	54.658	493	493	0	7.3741	4348800	2				178	776	TRUE	820	1398;1399	1768;1769	1769
tr|Q9HV96|Q9HV96_PSEAE	tr|Q9HV96|Q9HV96_PSEAE	2	2	2	>tr|Q9HV96|Q9HV96_PSEAE Uncharacterized protein OS=Pseudomonas aeruginosa (strain ATCC 15692 / PAO1 / 1C / PRS 101 / LMG 12228) GN=PA4701 PE=4 SV=1	1	2	2	2	4.8	4.8	4.8	58.376	520	520	0	14.42	5967400	3				179	190;323	True;True	204;341	340;341;553	437;438;688	437;688
tr|Q9HVJ1|Q9HVJ1_PSEAE	tr|Q9HVJ1|Q9HVJ1_PSEAE	5	5	5	>tr|Q9HVJ1|Q9HVJ1_PSEAE Probable ATP-binding component of ABC transporter OS=Pseudomonas aeruginosa (strain ATCC 15692 / PAO1 / 1C / PRS 101 / LMG 12228) GN=PA4595 PE=3 SV=1	1	5	5	5	10.3	10.3	10.3	61.32	554	554	0	34.643	13768000	6				180	27;209;333;583;616	True;True;True;True;True	27;223;352;621;655	42;370;371;567;1046;1103	55;468;469;706;1322;1400	55;469;706;1322;1400	96	66
tr|Q9HVS8|Q9HVS8_PSEAE	tr|Q9HVS8|Q9HVS8_PSEAE	1	1	1	>tr|Q9HVS8|Q9HVS8_PSEAE RoxR OS=Pseudomonas aeruginosa (strain ATCC 15692 / PAO1 / 1C / PRS 101 / LMG 12228) GN=roxR PE=4 SV=1	1	1	1	1	7.5	7.5	7.5	20.616	186	186	0.0080321	5.4359	748300	1				181	749	TRUE	793	1348	1705	1705
tr|Q9HVV5|Q9HVV5_PSEAE	tr|Q9HVV5|Q9HVV5_PSEAE	2	2	2	>tr|Q9HVV5|Q9HVV5_PSEAE Uncharacterized protein OS=Pseudomonas aeruginosa (strain ATCC 15692 / PAO1 / 1C / PRS 101 / LMG 12228) GN=PA4463 PE=4 SV=1	1	2	2	2	28.4	28.4	28.4	11.739	102	102	0	11.176	4901700	1				182	379;526	True;True	401;556	651;892	812;1108	812;1108	97;98	1;41
tr|Q9HVY4|Q9HVY4_PSEAE	tr|Q9HVY4|Q9HVY4_PSEAE	3	3	3	>tr|Q9HVY4|Q9HVY4_PSEAE Ubiquinol-cytochrome c reductase iron-sulfur subunit OS=Pseudomonas aeruginosa (strain ATCC 15692 / PAO1 / 1C / PRS 101 / LMG 12228) GN=PA4431 PE=4 SV=1	1	3	3	3	17.8	17.8	17.8	20.828	197	197	0	18.595	9466900	4				183	2;94;314	True;True;True	2;96;330	5;6;160;536	5;6;208;666	5;208;666
tr|Q9HVY6|Q9HVY6_PSEAE	tr|Q9HVY6|Q9HVY6_PSEAE	2	2	2	>tr|Q9HVY6|Q9HVY6_PSEAE Probable cytochrome c1 OS=Pseudomonas aeruginosa (strain ATCC 15692 / PAO1 / 1C / PRS 101 / LMG 12228) GN=PA4429 PE=4 SV=1	1	2	2	2	9.6	9.6	9.6	28.993	260	260	0	12.009	1380100	2				184	281;696	True;True	297;737	487;1257	615;1601	615;1601
tr|Q9HW49|Q9HW49_PSEAE	tr|Q9HW49|Q9HW49_PSEAE	4	4	4	>tr|Q9HW49|Q9HW49_PSEAE Uncharacterized protein OS=Pseudomonas aeruginosa (strain ATCC 15692 / PAO1 / 1C / PRS 101 / LMG 12228) GN=PA4352 PE=4 SV=1	1	4	4	4	16.1	16.1	16.1	30.972	286	286	0	25.108	14479000	6				185	165;352;408;719	True;True;True;True	176;373;431;762	291;606;699;1297;1298;1299	380;762;873;1650;1651;1652	380;762;873;1650
tr|Q9HW72|Q9HW72_PSEAE	tr|Q9HW72|Q9HW72_PSEAE	2	2	2	>tr|Q9HW72|Q9HW72_PSEAE Pyruvate kinase OS=Pseudomonas aeruginosa (strain ATCC 15692 / PAO1 / 1C / PRS 101 / LMG 12228) GN=pykA PE=3 SV=1	1	2	2	2	4.3	4.3	4.3	52.252	483	483	0	12.554	7946400	3				186	230;757	True;True	246;801	405;1360;1361	512;1721;1722	512;1721
tr|Q9HW86|Q9HW86_PSEAE	tr|Q9HW86|Q9HW86_PSEAE	1	1	1	>tr|Q9HW86|Q9HW86_PSEAE MvaT OS=Pseudomonas aeruginosa (strain ATCC 15692 / PAO1 / 1C / PRS 101 / LMG 12228) GN=mvaT PE=1 SV=1	1	1	1	1	8.9	8.9	8.9	14.18	124	124	0	6.5426	1216900	1				187	159	TRUE	168	278	357	357
tr|Q9HWG9|Q9HWG9_PSEAE	tr|Q9HWG9|Q9HWG9_PSEAE	1	1	1	>tr|Q9HWG9|Q9HWG9_PSEAE Flavin-containing monooxygenase OS=Pseudomonas aeruginosa (strain ATCC 15692 / PAO1 / 1C / PRS 101 / LMG 12228) GN=phzS PE=1 SV=1	1	1	1	1	6.2	6.2	6.2	43.644	402	402	0	7.7987	11507000	2				188	132	TRUE	136	228;229	297;298	298
tr|Q9HWQ0|Q9HWQ0_PSEAE	tr|Q9HWQ0|Q9HWQ0_PSEAE	3	3	3	>tr|Q9HWQ0|Q9HWQ0_PSEAE Probable iron-sulfur protein OS=Pseudomonas aeruginosa (strain ATCC 15692 / PAO1 / 1C / PRS 101 / LMG 12228) GN=PA4131 PE=4 SV=1	1	3	3	3	6.6	6.6	6.6	63.991	573	573	0	21.752	10681000	4				189	359;480;485	True;True;True	381;506;511	619;620;820;827	776;777;1025;1026;1033	777;1025;1033
tr|Q9HWR8|Q9HWR8_PSEAE	tr|Q9HWR8|Q9HWR8_PSEAE	1	1	1	>tr|Q9HWR8|Q9HWR8_PSEAE Probable sensor/response regulator hybrid OS=Pseudomonas aeruginosa (strain ATCC 15692 / PAO1 / 1C / PRS 101 / LMG 12228) GN=PA4112 PE=4 SV=1	1	1	1	1	0.6	0.6	0.6	153.89	1417	1417	0.0042017	5.5001	923040	0				190	722	TRUE	765	1305	1659	1659
tr|Q9HWT7|Q9HWT7_PSEAE	tr|Q9HWT7|Q9HWT7_PSEAE	1	1	1	>tr|Q9HWT7|Q9HWT7_PSEAE 4-hydroxyphenylacetate 3-monooxygenase large chain OS=Pseudomonas aeruginosa (strain ATCC 15692 / PAO1 / 1C / PRS 101 / LMG 12228) GN=hpaA PE=4 SV=1	1	1	1	1	1.5	1.5	1.5	58.464	520	520	0.008	5.4332	12118000	1				191	122	TRUE	126	213	278	278
tr|Q9HWV0|Q9HWV0_PSEAE	tr|Q9HWV0|Q9HWV0_PSEAE	1	1	1	>tr|Q9HWV0|Q9HWV0_PSEAE Probable nonribosomal peptide synthetase OS=Pseudomonas aeruginosa (strain ATCC 15692 / PAO1 / 1C / PRS 101 / LMG 12228) GN=PA4078 PE=4 SV=1	1	1	1	1	1.2	1.2	1.2	110.35	991	991	0	7.8697	1076100	2				192	720	TRUE	763	1300	1653;1654	1654
tr|Q9HWW1|Q9HWW1_PSEAE	tr|Q9HWW1|Q9HWW1_PSEAE	3	3	3	>tr|Q9HWW1|Q9HWW1_PSEAE Outer membrane protein OprG OS=Pseudomonas aeruginosa (strain ATCC 15692 / PAO1 / 1C / PRS 101 / LMG 12228) GN=oprG PE=1 SV=1	1	3	3	3	15.5	15.5	15.5	25.193	232	232	0	18.6	22421000	4				193	40;96;253	True;True;True	40;98;269	65;162;441;442	86;210;554;555	86;210;554
tr|Q9HX05|Q9HX05_PSEAE;tr|Q9I2C4|Q9I2C4_PSEAE	tr|Q9HX05|Q9HX05_PSEAE;tr|Q9I2C4|Q9I2C4_PSEAE	5;3	5;3	5;3	>tr|Q9HX05|Q9HX05_PSEAE Probable aldehyde dehydrogenase OS=Pseudomonas aeruginosa (strain ATCC 15692 / PAO1 / 1C / PRS 101 / LMG 12228) GN=PA4022 PE=3 SV=1;>tr|Q9I2C4|Q9I2C4_PSEAE NAD+ dependent aldehyde dehydrogenase ExaC OS=Pseudomonas aeruginosa (strain	2	5	5	5	14.6	14.6	14.6	54.979	506	506;506	0	45.673	25073000	8				194	60;303;424;814;831	True;True;True;True;True	61;319;447;858;875	101;519;520;721;722;1459;1460;1487	129;648;649;902;903;1846;1847;1896	129;649;903;1846;1896
tr|Q9HX12|Q9HX12_PSEAE	tr|Q9HX12|Q9HX12_PSEAE	1	1	1	>tr|Q9HX12|Q9HX12_PSEAE Uncharacterized protein OS=Pseudomonas aeruginosa (strain ATCC 15692 / PAO1 / 1C / PRS 101 / LMG 12228) GN=PA4015 PE=4 SV=1	1	1	1	1	5.3	5.3	5.3	16.7	151	151	0.0046512	5.8318	1201500	1				195	567	TRUE	605	1021	1292	1292
tr|Q9HX76|Q9HX76_PSEAE	tr|Q9HX76|Q9HX76_PSEAE	2	2	2	>tr|Q9HX76|Q9HX76_PSEAE Probable DNA binding protein OS=Pseudomonas aeruginosa (strain ATCC 15692 / PAO1 / 1C / PRS 101 / LMG 12228) GN=PA3940 PE=3 SV=1	1	2	2	2	29	29	29	9.8923	93	93	0	15.072	3159100	1				196	124;611	True;True	128;650	216;1094	281;1390	281;1390
tr|Q9HXI0|Q9HXI0_PSEAE	tr|Q9HXI0|Q9HXI0_PSEAE	1	1	1	>tr|Q9HXI0|Q9HXI0_PSEAE Uncharacterized protein OS=Pseudomonas aeruginosa (strain ATCC 15692 / PAO1 / 1C / PRS 101 / LMG 12228) GN=PA3822 PE=4 SV=1	1	1	1	1	11.6	11.6	11.6	11.862	112	112	0	7.1631	650450	0				197	238	TRUE	254	418	527	527
tr|Q9HXM5|Q9HXM5_PSEAE	tr|Q9HXM5|Q9HXM5_PSEAE	1	1	1	>tr|Q9HXM5|Q9HXM5_PSEAE Inosine-5-monophosphate dehydrogenase OS=Pseudomonas aeruginosa (strain ATCC 15692 / PAO1 / 1C / PRS 101 / LMG 12228) GN=guaB PE=1 SV=1	1	1	1	1	2.9	2.9	2.9	51.707	489	489	0.0079365	5.4267	88535	1				198	726	TRUE	770	1311	1666	1666
tr|Q9HXR8|Q9HXR8_PSEAE	tr|Q9HXR8|Q9HXR8_PSEAE	1	1	1	>tr|Q9HXR8|Q9HXR8_PSEAE Probable FMN oxidoreductase OS=Pseudomonas aeruginosa (strain ATCC 15692 / PAO1 / 1C / PRS 101 / LMG 12228) GN=PA3723 PE=4 SV=1	1	1	1	1	4.9	4.9	4.9	40.318	368	368	0.0044843	5.6953	3147500	1				199	213	TRUE	228	378	477	477
tr|Q9HXU8|Q9HXU8_PSEAE	tr|Q9HXU8|Q9HXU8_PSEAE	1	1	1	>tr|Q9HXU8|Q9HXU8_PSEAE Lipotoxon F, LptF OS=Pseudomonas aeruginosa (strain ATCC 15692 / PAO1 / 1C / PRS 101 / LMG 12228) GN=lptF PE=3 SV=1	1	1	1	1	5	5	5	28.514	261	261	0	9.0183	709060	0				200	535	TRUE	569	913	1138	1138
tr|Q9HXU9|Q9HXU9_PSEAE	tr|Q9HXU9|Q9HXU9_PSEAE	1	1	1	>tr|Q9HXU9|Q9HXU9_PSEAE Uncharacterized protein OS=Pseudomonas aeruginosa (strain ATCC 15692 / PAO1 / 1C / PRS 101 / LMG 12228) GN=PA3691 PE=4 SV=1	1	1	1	1	7.5	7.5	7.5	14.468	134	134	0.004386	5.6742	0	1				201	128	TRUE	132	224	292	292	99	122
tr|Q9HY01|Q9HY01_PSEAE	tr|Q9HY01|Q9HY01_PSEAE	1	1	1	>tr|Q9HY01|Q9HY01_PSEAE S-(hydroxymethyl)glutathione dehydrogenase OS=Pseudomonas aeruginosa (strain ATCC 15692 / PAO1 / 1C / PRS 101 / LMG 12228) GN=adhC PE=3 SV=1	1	1	1	1	3	3	3	39.208	370	370	0.0042735	5.5362	0	1				202	184	TRUE	196	325	416	416
tr|Q9HY12|Q9HY12_PSEAE	tr|Q9HY12|Q9HY12_PSEAE	2	2	2	>tr|Q9HY12|Q9HY12_PSEAE Uncharacterized protein OS=Pseudomonas aeruginosa (strain ATCC 15692 / PAO1 / 1C / PRS 101 / LMG 12228) GN=PA3614 PE=4 SV=1	1	2	2	2	4.1	4.1	4.1	51.921	467	467	0	11.623	3192800	2				203	422;684	True;True	445;724	718;719;1236	899;900;1576	900;1576
tr|Q9HY13|Q9HY13_PSEAE	tr|Q9HY13|Q9HY13_PSEAE	5	5	5	>tr|Q9HY13|Q9HY13_PSEAE Uncharacterized protein OS=Pseudomonas aeruginosa (strain ATCC 15692 / PAO1 / 1C / PRS 101 / LMG 12228) GN=PA3613 PE=4 SV=1	1	5	5	5	7.4	7.4	7.4	88.378	801	801	0	30.144	12333000	6				204	113;507;656;658;735	True;True;True;True;True	117;533;696;698;779	198;861;1188;1190;1325;1326	259;1074;1514;1516;1517;1682;1683	259;1074;1514;1516;1683
tr|Q9HY77|Q9HY77_PSEAE	tr|Q9HY77|Q9HY77_PSEAE	2	2	2	>tr|Q9HY77|Q9HY77_PSEAE Glutaredoxin OS=Pseudomonas aeruginosa (strain ATCC 15692 / PAO1 / 1C / PRS 101 / LMG 12228) GN=PA3533 PE=3 SV=1	1	2	2	2	19.4	19.4	19.4	11.843	108	108	0	16.409	7476000	3				205	205;514	True;True	219;541	364;365;872	462;463;1087	463;1087
tr|Q9HY79|Q9HY79_PSEAE	tr|Q9HY79|Q9HY79_PSEAE	1	1	1	>tr|Q9HY79|Q9HY79_PSEAE Ferroxidase OS=Pseudomonas aeruginosa (strain ATCC 15692 / PAO1 / 1C / PRS 101 / LMG 12228) GN=bfrB PE=1 SV=1	1	1	1	1	8.9	8.9	8.9	18.553	158	158	0	7.0065	348320	1				206	435	TRUE	458	738	920	920	100	52
tr|Q9HY81|Q9HY81_PSEAE	tr|Q9HY81|Q9HY81_PSEAE	3	3	3	>tr|Q9HY81|Q9HY81_PSEAE Probable peroxidase OS=Pseudomonas aeruginosa (strain ATCC 15692 / PAO1 / 1C / PRS 101 / LMG 12228) GN=PA3529 PE=4 SV=1	1	3	3	3	15.5	15.5	15.5	21.822	200	200	0	23.576	72114000	7				207	115;360;639	True;True;True	119;382;679	201;202;621;1144;1145	262;263;264;265;778;1452;1453	262;778;1452
tr|Q9HYK7|Q9HYK7_PSEAE	tr|Q9HYK7|Q9HYK7_PSEAE	1	1	1	>tr|Q9HYK7|Q9HYK7_PSEAE Ferredoxin--NADP+ reductase OS=Pseudomonas aeruginosa (strain ATCC 15692 / PAO1 / 1C / PRS 101 / LMG 12228) GN=fpr PE=1 SV=1	1	1	1	1	3.5	3.5	3.5	29.517	258	258	0.0042918	5.5376	2168800	0				208	769	TRUE	813	1385	1751	1751
tr|Q9HYT5|Q9HYT5_PSEAE	tr|Q9HYT5|Q9HYT5_PSEAE	7	7	7	>tr|Q9HYT5|Q9HYT5_PSEAE Uncharacterized protein OS=Pseudomonas aeruginosa (strain ATCC 15692 / PAO1 / 1C / PRS 101 / LMG 12228) GN=PA3309 PE=4 SV=1	1	7	7	7	56.3	56.3	56.3	16.496	151	151	0	74.086	192920000	20				209	180;296;317;353;462;715;744	True;True;True;True;True;True;True	192;312;333;334;374;486;487;758;788	318;319;512;540;541;542;607;608;609;787;788;789;790;1291;1292;1341;1342	409;410;641;673;674;675;676;677;763;764;765;980;981;982;983;984;985;1644;1645;1698;1699	409;641;673;764;980;1644;1698	101;102	117;129
tr|Q9HZ86|Q9HZ86_PSEAE	tr|Q9HZ86|Q9HZ86_PSEAE	1	1	1	>tr|Q9HZ86|Q9HZ86_PSEAE Nucleotide sugar epimerase/dehydratase WbpM OS=Pseudomonas aeruginosa (strain ATCC 15692 / PAO1 / 1C / PRS 101 / LMG 12228) GN=wbpM PE=4 SV=1	1	1	1	1	1.2	1.2	1.2	74.415	665	665	0.0081301	5.4484	2349000	1				210	519	TRUE	547	880	1095	1095	103	1
tr|Q9HZK4|Q9HZK4_PSEAE	tr|Q9HZK4|Q9HZK4_PSEAE	3	3	3	>tr|Q9HZK4|Q9HZK4_PSEAE Glyceraldehyde-3-phosphate dehydrogenase OS=Pseudomonas aeruginosa (strain ATCC 15692 / PAO1 / 1C / PRS 101 / LMG 12228) GN=PA3001 PE=3 SV=1	1	3	3	3	10.8	10.8	10.8	50.111	461	461	0	17.411	29739000	4				211	26;109;433	True;True;True	26;113;456	41;192;734;735	54;253;916;917	54;253;916
tr|Q9HZM8|Q9HZM8_PSEAE	tr|Q9HZM8|Q9HZM8_PSEAE	1	1	1	>tr|Q9HZM8|Q9HZM8_PSEAE Ribonuclease E OS=Pseudomonas aeruginosa (strain ATCC 15692 / PAO1 / 1C / PRS 101 / LMG 12228) GN=rne PE=3 SV=1	1	1	1	1	0.9	0.9	0.9	117.46	1057	1057	1	-2	723480	0	+			212	839	TRUE	883	1499	1910	1910	104	128
tr|Q9I0H1|Q9I0H1_PSEAE	tr|Q9I0H1|Q9I0H1_PSEAE	1	1	1	>tr|Q9I0H1|Q9I0H1_PSEAE Uncharacterized protein OS=Pseudomonas aeruginosa (strain ATCC 15692 / PAO1 / 1C / PRS 101 / LMG 12228) GN=PA2667 PE=4 SV=1	1	1	1	1	9.4	9.4	9.4	13.379	117	117	0	7.3643	884320	2				213	88	TRUE	89	146;147	188;189	188
tr|Q9I0L4|Q9I0L4_PSEAE	tr|Q9I0L4|Q9I0L4_PSEAE	8	8	8	>tr|Q9I0L4|Q9I0L4_PSEAE Isocitrate dehydrogenase OS=Pseudomonas aeruginosa (strain ATCC 15692 / PAO1 / 1C / PRS 101 / LMG 12228) GN=idh PE=4 SV=1	1	8	8	8	13.4	13.4	13.4	81.633	741	741	0	61.002	27855000	11				214	234;251;299;349;415;479;578;599	True;True;True;True;True;True;True;True	250;267;315;370;438;505;616;637	412;438;515;602;603;709;819;1039;1040;1071	520;551;644;758;759;888;1024;1314;1315;1355;1356	520;551;644;758;888;1024;1314;1355	105	191
tr|Q9I0L5|Q9I0L5_PSEAE	tr|Q9I0L5|Q9I0L5_PSEAE	10	10	10	>tr|Q9I0L5|Q9I0L5_PSEAE Isocitrate dehydrogenase [NADP] OS=Pseudomonas aeruginosa (strain ATCC 15692 / PAO1 / 1C / PRS 101 / LMG 12228) GN=icd PE=3 SV=1	1	10	10	10	27	27	27	45.577	418	418	0	73.456	114600000	18				215	73;103;223;274;297;308;368;392;695;806	True;True;True;True;True;True;True;True;True;True	74;105;238;239;290;313;324;390;414;415;736;850	122;123;177;178;393;394;395;396;476;513;528;529;633;674;675;1256;1447	158;159;232;233;234;498;499;500;501;502;603;642;657;658;792;839;840;1600;1832	158;233;498;603;642;657;792;840;1600;1832	106;107;108	68;151;185
tr|Q9I0T0|Q9I0T0_PSEAE	tr|Q9I0T0|Q9I0T0_PSEAE	1	1	1	>tr|Q9I0T0|Q9I0T0_PSEAE Probable short-chain dehydrogenase OS=Pseudomonas aeruginosa (strain ATCC 15692 / PAO1 / 1C / PRS 101 / LMG 12228) GN=PA2554 PE=3 SV=1	1	1	1	1	6.7	6.7	6.7	26.426	255	255	0	13.411	295620	4				216	399	TRUE	422	684;685	851;852;853;854	852	109	129
tr|Q9I0T1|Q9I0T1_PSEAE	tr|Q9I0T1|Q9I0T1_PSEAE	4	4	4	>tr|Q9I0T1|Q9I0T1_PSEAE Probable acyl-CoA thiolase OS=Pseudomonas aeruginosa (strain ATCC 15692 / PAO1 / 1C / PRS 101 / LMG 12228) GN=PA2553 PE=3 SV=1	1	4	4	4	12.9	12.9	12.9	41.4	396	396	0	25.619	10444000	3				217	161;169;226;681	True;True;True;True	170;180;242;721	281;297;399;1232	362;387;505;1572	362;387;505;1572
tr|Q9I140|Q9I140_PSEAE	tr|Q9I140|Q9I140_PSEAE	1	1	1	>tr|Q9I140|Q9I140_PSEAE Aminomethyltransferase OS=Pseudomonas aeruginosa (strain ATCC 15692 / PAO1 / 1C / PRS 101 / LMG 12228) GN=gcvT2 PE=3 SV=1	1	1	1	1	3.2	3.2	3.2	39.882	373	373	0	10.165	3915000	2				218	320	TRUE	337	546;547	681;682	682
tr|Q9I1E7|Q9I1E7_PSEAE	tr|Q9I1E7|Q9I1E7_PSEAE	1	1	1	>tr|Q9I1E7|Q9I1E7_PSEAE Alkyl hydroperoxide reductase AhpD OS=Pseudomonas aeruginosa (strain ATCC 15692 / PAO1 / 1C / PRS 101 / LMG 12228) GN=PA2331 PE=4 SV=1	1	1	1	1	6.5	6.5	6.5	19.904	186	186	0	8.0089	1747000	2				219	237	TRUE	253	417	525;526	526
tr|Q9I1E8|Q9I1E8_PSEAE	tr|Q9I1E8|Q9I1E8_PSEAE	1	1	1	>tr|Q9I1E8|Q9I1E8_PSEAE Uncharacterized protein OS=Pseudomonas aeruginosa (strain ATCC 15692 / PAO1 / 1C / PRS 101 / LMG 12228) GN=PA2330 PE=4 SV=1	1	1	1	1	3.9	3.9	3.9	37.68	355	355	0	6.3846	1304200	1				220	440	TRUE	464	747	934	934
tr|Q9I1H3|Q9I1H3_PSEAE	tr|Q9I1H3|Q9I1H3_PSEAE	1	1	1	>tr|Q9I1H3|Q9I1H3_PSEAE AmbE OS=Pseudomonas aeruginosa (strain ATCC 15692 / PAO1 / 1C / PRS 101 / LMG 12228) GN=ambE PE=4 SV=1	1	1	1	1	0.8	0.8	0.8	229.04	2124	2124	0	6.6821	609560	1				221	0	TRUE	0	0	0	0
tr|Q9I1H5|Q9I1H5_PSEAE	tr|Q9I1H5|Q9I1H5_PSEAE	2	2	2	>tr|Q9I1H5|Q9I1H5_PSEAE Chitinase OS=Pseudomonas aeruginosa (strain ATCC 15692 / PAO1 / 1C / PRS 101 / LMG 12228) GN=chiC PE=3 SV=1	1	2	2	2	6.8	6.8	6.8	53.042	483	483	0	13.535	15856000	3				222	710;816	True;True	753;860	1281;1282;1462	1629;1630;1849	1629;1849
tr|Q9I1N4|Q9I1N4_PSEAE	tr|Q9I1N4|Q9I1N4_PSEAE	1	1	1	>tr|Q9I1N4|Q9I1N4_PSEAE PslE OS=Pseudomonas aeruginosa (strain ATCC 15692 / PAO1 / 1C / PRS 101 / LMG 12228) GN=pslE PE=4 SV=1	1	1	1	1	2.3	2.3	2.3	74.564	662	662	0	6.4523	88907	1				223	197	TRUE	211	353	451	451
tr|Q9I1N7|Q9I1N7_PSEAE	tr|Q9I1N7|Q9I1N7_PSEAE	1	1	1	>tr|Q9I1N7|Q9I1N7_PSEAE PslB OS=Pseudomonas aeruginosa (strain ATCC 15692 / PAO1 / 1C / PRS 101 / LMG 12228) GN=pslB PE=3 SV=1	1	1	1	1	2.7	2.7	2.7	53.515	488	488	0	7.9144	717070	2				224	186	TRUE	199	330;331	422;423	422
tr|Q9I210|Q9I210_PSEAE	tr|Q9I210|Q9I210_PSEAE	1	1	1	>tr|Q9I210|Q9I210_PSEAE Probable acetyltransferase OS=Pseudomonas aeruginosa (strain ATCC 15692 / PAO1 / 1C / PRS 101 / LMG 12228) GN=PA2105 PE=4 SV=1	1	1	1	1	3.5	3.5	3.5	24.796	231	231	0.0043668	5.6562	2188900	0				225	490	TRUE	516	836	1042	1042	110	69
tr|Q9I246|Q9I246_PSEAE	tr|Q9I246|Q9I246_PSEAE	6	6	6	>tr|Q9I246|Q9I246_PSEAE Probable carbamoyl transferase OS=Pseudomonas aeruginosa (strain ATCC 15692 / PAO1 / 1C / PRS 101 / LMG 12228) GN=PA2069 PE=4 SV=1	1	6	6	6	13.2	13.2	13.2	63.382	574	574	0	38.945	16331000	5				226	224;240;295;376;622;625	True;True;True;True;True;True	240;256;311;398;661;664	397;421;422;511;648;1112;1115	503;531;532;640;809;1411;1414	503;531;640;809;1411;1414	111	353
tr|Q9I296|Q9I296_PSEAE	tr|Q9I296|Q9I296_PSEAE	1	1	1	>tr|Q9I296|Q9I296_PSEAE Putative isovaleryl-CoA dehydrogenase OS=Pseudomonas aeruginosa (strain ATCC 15692 / PAO1 / 1C / PRS 101 / LMG 12228) GN=liuA PE=3 SV=1	1	1	1	1	3.1	3.1	3.1	42.209	387	387	0	8.5341	2286200	0				227	700	TRUE	741	1262	1606	1606	112	293
tr|Q9I2A2|Q9I2A2_PSEAE	tr|Q9I2A2|Q9I2A2_PSEAE	1	1	1	>tr|Q9I2A2|Q9I2A2_PSEAE Fumarylacetoacetase OS=Pseudomonas aeruginosa (strain ATCC 15692 / PAO1 / 1C / PRS 101 / LMG 12228) GN=fahA PE=4 SV=1	1	1	1	1	2.5	2.5	2.5	46.341	432	432	0	9.3864	3250500	1				228	216	TRUE	231	383	483	483
tr|Q9I2A9|Q9I2A9_PSEAE	tr|Q9I2A9|Q9I2A9_PSEAE	1	1	1	>tr|Q9I2A9|Q9I2A9_PSEAE DhcB, dehydrocarnitine CoA transferase, subunit B OS=Pseudomonas aeruginosa (strain ATCC 15692 / PAO1 / 1C / PRS 101 / LMG 12228) GN=dhcB PE=4 SV=1	1	1	1	1	5.5	5.5	5.5	23.187	218	218	0.0044053	5.6831	9592000	3				229	82	TRUE	83	135;136	175;176;177	177
tr|Q9I2R2|Q9I2R2_PSEAE	tr|Q9I2R2|Q9I2R2_PSEAE	2	2	2	>tr|Q9I2R2|Q9I2R2_PSEAE Probable oxidoreductase OS=Pseudomonas aeruginosa (strain ATCC 15692 / PAO1 / 1C / PRS 101 / LMG 12228) GN=PA1833 PE=4 SV=1	1	2	2	2	6.7	6.7	6.7	34.551	330	330	0	11.991	4004200	0				230	154;427	True;True	161;450	267;726	343;907	343;907
tr|Q9I2V3|Q9I2V3_PSEAE	tr|Q9I2V3|Q9I2V3_PSEAE	1	1	1	>tr|Q9I2V3|Q9I2V3_PSEAE Uncharacterized protein OS=Pseudomonas aeruginosa (strain ATCC 15692 / PAO1 / 1C / PRS 101 / LMG 12228) GN=PA1789 PE=1 SV=1	1	1	1	1	5.2	5.2	5.2	31.273	287	287	0	6.156	2205900	2				231	347	TRUE	368	599	753;754	754
tr|Q9I2W9|Q9I2W9_PSEAE	tr|Q9I2W9|Q9I2W9_PSEAE	6	6	6	>tr|Q9I2W9|Q9I2W9_PSEAE Phosphoenolpyruvate synthase OS=Pseudomonas aeruginosa (strain ATCC 15692 / PAO1 / 1C / PRS 101 / LMG 12228) GN=ppsA PE=3 SV=1	1	6	6	6	9.4	9.4	9.4	85.816	791	791	0	41.654	20872000	9				232	36;70;202;304;423;635	True;True;True;True;True;True	36;71;216;320;446;674	57;58;117;118;359;521;720;1132	76;77;78;152;153;457;650;901;1437	76;153;457;650;901;1437
tr|Q9I2Z1|Q9I2Z1_PSEAE	tr|Q9I2Z1|Q9I2Z1_PSEAE	2	2	2	>tr|Q9I2Z1|Q9I2Z1_PSEAE Uncharacterized protein OS=Pseudomonas aeruginosa (strain ATCC 15692 / PAO1 / 1C / PRS 101 / LMG 12228) GN=PA1746 PE=4 SV=1	1	2	2	2	17.3	17.3	17.3	18.189	168	168	0	14.461	20038000	5				233	80;98	True;True	81;100	132;165;166;167	169;170;214;215;216	169;214
tr|Q9I315|Q9I315_PSEAE	tr|Q9I315|Q9I315_PSEAE	1	1	1	>tr|Q9I315|Q9I315_PSEAE Type III export protein PscI OS=Pseudomonas aeruginosa (strain ATCC 15692 / PAO1 / 1C / PRS 101 / LMG 12228) GN=pscI PE=4 SV=1	1	1	1	1	8.9	8.9	8.9	12.173	112	112	0.0041494	5.4861	9028400	1				234	378	TRUE	400	650	811	811	113	89
tr|Q9I3D3|Q9I3D3_PSEAE	tr|Q9I3D3|Q9I3D3_PSEAE	7	7	7	>tr|Q9I3D3|Q9I3D3_PSEAE 2-oxoglutarate dehydrogenase (E1 subunit) OS=Pseudomonas aeruginosa (strain ATCC 15692 / PAO1 / 1C / PRS 101 / LMG 12228) GN=sucA PE=4 SV=1	1	7	7	7	7.4	7.4	7.4	105.88	943	943	0	52.202	44965000	11				235	123;137;271;309;383;472;473	True;True;True;True;True;True;True	127;141;287;325;405;498;499	214;215;236;473;530;658;807;808;809;810	279;280;306;600;659;819;1009;1010;1011;1012;1013	279;306;600;659;819;1009;1012
tr|Q9I3D4|Q9I3D4_PSEAE	tr|Q9I3D4|Q9I3D4_PSEAE	4	4	4	>tr|Q9I3D4|Q9I3D4_PSEAE Succinate dehydrogenase (B subunit) OS=Pseudomonas aeruginosa (strain ATCC 15692 / PAO1 / 1C / PRS 101 / LMG 12228) GN=sdhB PE=4 SV=1	1	4	4	4	22.6	22.6	22.6	26.155	235	235	0	26.05	22865000	10				236	219;412;501;747	True;True;True;True	234;435;527;791	388;705;706;852;853;1345;1346	493;881;882;883;884;885;1065;1066;1702;1703	493;883;1065;1702
tr|Q9I3D5|Q9I3D5_PSEAE	tr|Q9I3D5|Q9I3D5_PSEAE	7	7	7	>tr|Q9I3D5|Q9I3D5_PSEAE Succinate dehydrogenase flavoprotein subunit OS=Pseudomonas aeruginosa (strain ATCC 15692 / PAO1 / 1C / PRS 101 / LMG 12228) GN=sdhA PE=3 SV=1	1	7	7	7	15.3	15.3	15.3	63.531	590	590	0	45.734	47230000	11				237	111;195;235;243;265;417;663	True;True;True;True;True;True;True	115;209;251;259;281;440;703	195;350;413;414;425;426;464;465;712;1197;1198	256;448;521;522;535;536;589;590;893;1525;1526;1527	256;448;521;535;590;893;1525
tr|Q9I4I1|Q9I4I1_PSEAE	tr|Q9I4I1|Q9I4I1_PSEAE	2	2	2	>tr|Q9I4I1|Q9I4I1_PSEAE Ribonucleoside-diphosphate reductase OS=Pseudomonas aeruginosa (strain ATCC 15692 / PAO1 / 1C / PRS 101 / LMG 12228) GN=nrdA PE=3 SV=1	1	2	2	2	3.1	3.1	3.1	107.11	963	963	0	19.788	5197200	4				238	536;800	True;True	570;844	914;915;1436;1437	1139;1140;1818;1819	1139;1819
tr|Q9I4S1|Q9I4S1_PSEAE	tr|Q9I4S1|Q9I4S1_PSEAE	3	3	3	>tr|Q9I4S1|Q9I4S1_PSEAE Uncharacterized protein OS=Pseudomonas aeruginosa (strain ATCC 15692 / PAO1 / 1C / PRS 101 / LMG 12228) GN=PA1053 PE=4 SV=1	1	3	3	3	29.2	29.2	29.2	15.649	154	154	0	43.192	17104000	5				239	116;680;685	True;True;True	120;720;725	203;204;1230;1231;1237	266;267;1570;1571;1577	266;1571;1577
tr|Q9I4S6|Q9I4S6_PSEAE	tr|Q9I4S6|Q9I4S6_PSEAE	1	1	1	>tr|Q9I4S6|Q9I4S6_PSEAE Probable outer membrane protein OS=Pseudomonas aeruginosa (strain ATCC 15692 / PAO1 / 1C / PRS 101 / LMG 12228) GN=PA1048 PE=4 SV=1	1	1	1	1	2.7	2.7	2.7	31.509	293	293	0.004329	5.5611	439510	0				240	24	TRUE	24	39	52	52
tr|Q9I4W5|Q9I4W5_PSEAE	tr|Q9I4W5|Q9I4W5_PSEAE	1	1	1	>tr|Q9I4W5|Q9I4W5_PSEAE Bacterioferritin comigratory protein OS=Pseudomonas aeruginosa (strain ATCC 15692 / PAO1 / 1C / PRS 101 / LMG 12228) GN=bcp PE=4 SV=1	1	1	1	1	12.1	12.1	12.1	17.352	157	157	0.0046729	5.8568	3882500	0				241	584	TRUE	622	1047;1048	1323;1324	1324
tr|Q9I4X1|Q9I4X1_PSEAE	tr|Q9I4X1|Q9I4X1_PSEAE	1	1	1	>tr|Q9I4X1|Q9I4X1_PSEAE PqsC OS=Pseudomonas aeruginosa (strain ATCC 15692 / PAO1 / 1C / PRS 101 / LMG 12228) GN=pqsC PE=4 SV=1	1	1	1	1	3.4	3.4	3.4	38.238	348	348	0	6.7345	2975400	5				242	476	TRUE	502	813;814;815	1016;1017;1018;1019;1020	1017
tr|Q9I4Z7|Q9I4Z7_PSEAE	tr|Q9I4Z7|Q9I4Z7_PSEAE	2	2	2	>tr|Q9I4Z7|Q9I4Z7_PSEAE Probable dna-binding stress protein OS=Pseudomonas aeruginosa (strain ATCC 15692 / PAO1 / 1C / PRS 101 / LMG 12228) GN=PA0962 PE=3 SV=1	1	2	2	2	14.1	14.1	14.1	17.493	156	156	0	16.166	5129000	3				243	6;781	True;True	6;825	10;1407;1408	10;1781;1782	10;1782
tr|Q9I5E3|Q9I5E3_PSEAE	tr|Q9I5E3|Q9I5E3_PSEAE	1	1	1	>tr|Q9I5E3|Q9I5E3_PSEAE Citrate synthase OS=Pseudomonas aeruginosa (strain ATCC 15692 / PAO1 / 1C / PRS 101 / LMG 12228) GN=prpC PE=3 SV=1	1	1	1	1	5.1	5.1	5.1	41.689	375	375	0	13.379	1534400	2				244	662	TRUE	702	1195;1196	1523;1524	1523
tr|Q9I5F6|Q9I5F6_PSEAE	tr|Q9I5F6|Q9I5F6_PSEAE	1	1	1	>tr|Q9I5F6|Q9I5F6_PSEAE Bifunctional protein PutA OS=Pseudomonas aeruginosa (strain ATCC 15692 / PAO1 / 1C / PRS 101 / LMG 12228) GN=putA PE=3 SV=1	1	1	1	1	1.4	1.4	1.4	115.63	1060	1060	0	8.2653	6302700	2				245	773	TRUE	817	1391;1392	1759;1760	1760
tr|Q9I5I4|Q9I5I4_PSEAE	tr|Q9I5I4|Q9I5I4_PSEAE	1	1	1	>tr|Q9I5I4|Q9I5I4_PSEAE Probable enoyl-CoA hydratase/isomerase OS=Pseudomonas aeruginosa (strain ATCC 15692 / PAO1 / 1C / PRS 101 / LMG 12228) GN=PA0745 PE=3 SV=1	1	1	1	1	4	4	4	29.904	272	272	0	6.4803	6039000	0				246	231	TRUE	247	406;407	513;514	514
tr|Q9I5U9|Q9I5U9_PSEAE	tr|Q9I5U9|Q9I5U9_PSEAE	13	13	13	>tr|Q9I5U9|Q9I5U9_PSEAE Uncharacterized protein OS=Pseudomonas aeruginosa (strain ATCC 15692 / PAO1 / 1C / PRS 101 / LMG 12228) GN=PA0588 PE=4 SV=1	1	13	13	13	22.2	22.2	22.2	73.722	640	640	0	107.87	112540000	25				247	8;150;395;450;460;468;509;545;564;568;624;659;844	True;True;True;True;True;True;True;True;True;True;True;True;True	8;156;157;418;474;484;494;535;579;601;606;663;699;888	12;260;261;679;767;768;769;770;784;785;800;801;864;865;967;968;1015;1022;1023;1114;1191;1192;1507	12;332;333;334;844;957;958;959;960;977;978;998;999;1077;1078;1079;1228;1229;1286;1293;1294;1413;1518;1519;1520;1918	12;332;844;958;978;998;1079;1228;1286;1294;1413;1518;1918	114	412
tr|Q9I5Y8|Q9I5Y8_PSEAE	tr|Q9I5Y8|Q9I5Y8_PSEAE	3	3	3	>tr|Q9I5Y8|Q9I5Y8_PSEAE Transketolase OS=Pseudomonas aeruginosa (strain ATCC 15692 / PAO1 / 1C / PRS 101 / LMG 12228) GN=tktA PE=1 SV=1	1	3	3	3	5.7	5.7	5.7	72.219	665	665	0	16.692	8477500	3				248	201;305;748	True;True;True	215;321;792	358;522;523;1347	456;651;652;1704	456;652;1704
tr|Q9I659|Q9I659_PSEAE	tr|Q9I659|Q9I659_PSEAE	7	7	6	>tr|Q9I659|Q9I659_PSEAE Probable ClpA/B protease ATP binding subunit OS=Pseudomonas aeruginosa (strain ATCC 15692 / PAO1 / 1C / PRS 101 / LMG 12228) GN=PA0459 PE=4 SV=1	1	7	7	6	9.5	9.5	8	94.174	850	850	0	47.227	22994000	10				249	51;313;493;540;566;711;830	True;True;True;True;True;True;True	52;329;519;574;604;754;874	85;535;840;959;960;1019;1020;1283;1284;1486	111;664;665;1049;1219;1220;1290;1291;1631;1632;1895	111;664;1049;1219;1291;1632;1895	115;116	576;580
tr|Q9I671|Q9I671_PSEAE	tr|Q9I671|Q9I671_PSEAE	3	3	3	>tr|Q9I671|Q9I671_PSEAE Glutaryl-CoA dehydrogenase OS=Pseudomonas aeruginosa (strain ATCC 15692 / PAO1 / 1C / PRS 101 / LMG 12228) GN=gcdH PE=3 SV=1	1	3	3	3	8.4	8.4	8.4	43.311	393	393	0	21.464	18844000	4				250	151;289;582	True;True;True	158;305;620	262;263;499;500;501;1045	335;336;627;628;629;1321	336;629;1321
tr|Q9I688|Q9I688_PSEAE	tr|Q9I688|Q9I688_PSEAE	1	1	1	>tr|Q9I688|Q9I688_PSEAE Uncharacterized protein OS=Pseudomonas aeruginosa (strain ATCC 15692 / PAO1 / 1C / PRS 101 / LMG 12228) GN=PA0429 PE=4 SV=1	1	1	1	1	2	2	2	40.872	356	356	0.0041667	5.4879	18013000	0				251	786	TRUE	830	1414	1789	1789
tr|Q9I689|Q9I689_PSEAE	tr|Q9I689|Q9I689_PSEAE	1	1	1	>tr|Q9I689|Q9I689_PSEAE ATP-dependent RNA helicase RhlE OS=Pseudomonas aeruginosa (strain ATCC 15692 / PAO1 / 1C / PRS 101 / LMG 12228) GN=rhlE PE=3 SV=1	1	1	1	1	3.8	3.8	3.8	70.111	639	639	0	7.1389	530410	4				252	126	TRUE	130	220;221	286;287;288;289	287
tr|Q9I6A1|Q9I6A1_PSEAE	tr|Q9I6A1|Q9I6A1_PSEAE	1	1	1	>tr|Q9I6A1|Q9I6A1_PSEAE Cystathionine beta-synthase OS=Pseudomonas aeruginosa (strain ATCC 15692 / PAO1 / 1C / PRS 101 / LMG 12228) GN=PA0399 PE=4 SV=1	1	1	1	1	3.5	3.5	3.5	49.17	457	457	0	18.387	1450600	1				253	743	TRUE	787	1339;1340	1696;1697	1696
tr|Q9I6H5|Q9I6H5_PSEAE	tr|Q9I6H5|Q9I6H5_PSEAE	3	3	3	>tr|Q9I6H5|Q9I6H5_PSEAE D-3-phosphoglycerate dehydrogenase OS=Pseudomonas aeruginosa (strain ATCC 15692 / PAO1 / 1C / PRS 101 / LMG 12228) GN=serA PE=3 SV=1	1	3	3	3	9	9	9	44.216	409	409	0	18.865	8639700	3				254	5;221;301	True;True;True	5;236;317	9;391;517	9;496;646	9;496;646
tr|Q9I6Z3|Q9I6Z3_PSEAE	tr|Q9I6Z3|Q9I6Z3_PSEAE	8	8	8	>tr|Q9I6Z3|Q9I6Z3_PSEAE Alkyl hydroperoxide reductase subunit C OS=Pseudomonas aeruginosa (strain ATCC 15692 / PAO1 / 1C / PRS 101 / LMG 12228) GN=ahpC PE=4 SV=1	1	8	8	8	44.9	44.9	44.9	20.541	187	187	0	60.839	140500000	20				255	39;214;282;631;668;669;692;802	True;True;True;True;True;True;True;True	39;229;298;670;708;709;733;846	63;64;379;380;488;1126;1127;1206;1207;1208;1209;1250;1251;1252;1253;1439;1440;1441;1442	83;84;85;478;479;616;1428;1429;1535;1536;1537;1538;1539;1594;1595;1596;1597;1821;1822;1823;1824	83;478;616;1429;1537;1538;1597;1822
tr|Q9I745|Q9I745_PSEAE	tr|Q9I745|Q9I745_PSEAE	1	1	1	>tr|Q9I745|Q9I745_PSEAE Uncharacterized protein OS=Pseudomonas aeruginosa (strain ATCC 15692 / PAO1 / 1C / PRS 101 / LMG 12228) GN=PA0087 PE=4 SV=1	1	1	1	1	4.7	4.7	4.7	18.693	169	169	0.0042553	5.5302	11306000	1				256	29	TRUE	29	45	58	58
tr|Q9I762|Q9I762_PSEAE	tr|Q9I762|Q9I762_PSEAE	3	3	3	>tr|Q9I762|Q9I762_PSEAE Uncharacterized protein OS=Pseudomonas aeruginosa (strain ATCC 15692 / PAO1 / 1C / PRS 101 / LMG 12228) GN=PA0070 PE=4 SV=1	1	3	3	3	10.9	10.9	10.9	31.716	304	304	0	18.654	4945100	5				257	45;141;331	True;True;True	46;146;350	73;245;564	94;95;315;700;701	94;315;701

## Sheet: 1-1 proteinGroups Probe 12
Protein IDs	Majority protein IDs	Peptide counts (all)	Peptide counts (razor+unique)	Peptide counts (unique)	Fasta headers	Number of proteins	Peptides	Razor + unique peptides	Unique peptides	Sequence coverage [%]	Unique + razor sequence coverage [%]	Unique sequence coverage [%]	Mol. weight [kDa]	Sequence length	Sequence lengths	Q-value	Score	Intensity	MS/MS Count	Only identified by site	Reverse	Potential contaminant	id	Peptide IDs	Peptide is razor	Mod. peptide IDs	Evidence IDs	MS/MS IDs	Best MS/MS	Oxidation (M) site IDs	Oxidation (M) site positions
CON__P00761	CON__P00761	3	3	3	>P00761 SWISS-PROT:P00761|TRYP_PIG Trypsin - Sus scrofa (Pig).	1	3	3	3	20.8	20.8	20.8	24.409	231	231	0	29.4	4340800000	20			+	0	305;397;649	True;True;True	321;414;683	531;532;533;534;684;685;1247;1248;1249	649;650;651;652;653;654;655;656;657;658;659;851;852;853;1566;1567;1568;1569;1570;1571;1572	658;853;1567
CON__P02533;CON__Q6IFX2;CON__Q04695;CON__Q9QWL7;CON__P19012;CON__A2A4G1;CON__P08727;CON__P19001;CON__Q61782;CON__P05784;CON__P35900;CON__Q9D312;CON__Q99456;CON__Q8N1A0;CON__Q14525;CON__Q9UE12;CON__Q15323;CON__A2A5Y0;CON__Q92764;CON__Q14532;CON__A2AB72;CON__Q497I4;CON__O76015;CON__O76013;CON__Q7Z3Y9;CON__O76014;CON__REFSEQ:XP_986630	CON__P02533;CON__Q6IFX2	17;9;8;8;7;7;6;5;3;2;2;2;2;1;1;1;1;1;1;1;1;1;1;1;1;1;1	7;4;1;2;0;0;1;0;1;0;0;0;0;0;0;0;0;0;0;0;0;0;0;0;0;0;0	7;4;1;2;0;0;1;0;1;0;0;0;0;0;0;0;0;0;0;0;0;0;0;0;0;0;0	>P02533 SWISS-PROT:P02533 Tax_Id=9606 Gene_Symbol=KRT14 Keratin, type I cytoskeletal 14;>Q6IFX2 SWISS-PROT:Q6IFX2 Tax_Id=10090 Gene_Symbol=Krt42 Keratin, type I cytoskeletal 42	27	17	7	7	37.3	21.4	21.4	51.621	472	472;452;432;433;456;456;400;403;93;423;424;431;494;295;404;416;416;416;425;448;453;455;456;467;468;471;476	0	111.19	122100000	14			+	1	53;74;88;107;167;251;335;357;373;374;388;416;474;615;630;688;721	False;True;False;True;True;True;False;False;False;False;False;True;True;True;False;False;False	54;75;90;111;179;265;352;374;390;391;405;434;497;647;663;724;757;758	96;97;133;134;156;157;193;194;310;311;441;442;588;624;625;647;648;670;671;720;822;823;1182;1212;1213;1313;1314;1368;1369;1370;1371	116;117;118;119;120;162;163;190;191;237;238;379;380;543;544;545;546;729;777;778;779;780;781;811;812;837;838;895;1011;1012;1482;1524;1525;1644;1645;1646;1647;1714;1715;1716;1717;1718;1719;1720;1721;1722;1723	117;162;191;237;380;546;729;780;811;812;838;895;1012;1482;1525;1647;1715	0;1;2	119;212;272
CON__P02538;CON__P05787;CON__O95678;CON__H-INV:HIT000016045;CON__H-INV:HIT000292931	CON__P02538	18;5;5;2;2	13;2;2;0;2	2;0;0;0;0	>P02538 SWISS-PROT:P02538 Tax_Id=9606 Gene_Symbol=KRT6A Keratin, type II cytoskeletal 6A	5	18	13	2	27.7	20.9	3.5	60.044	564	564;483;551;99;443	0	87.8	812540000	19			+	2	13;43;83;169;173;183;245;386;496;500;502;540;561;601;602;739;745;748	True;True;False;True;False;True;True;True;True;False;False;True;True;True;True;True;False;True	13;44;84;181;185;196;259;403;522;526;528;569;591;633;634;776;782;785	23;24;78;147;148;314;321;322;338;432;666;667;918;919;920;934;935;936;937;938;940;1014;1055;1056;1162;1163;1400;1401;1420;1421;1428	29;30;31;95;177;178;179;180;181;383;390;391;411;533;832;833;1150;1151;1152;1167;1168;1169;1170;1171;1172;1173;1174;1175;1176;1177;1178;1180;1272;1325;1326;1459;1460;1757;1758;1759;1792;1793;1806	29;95;180;383;391;411;533;833;1152;1172;1180;1272;1325;1459;1460;1757;1792;1806	3;4	242;452
CON__P04264	CON__P04264	27	27	16	>P04264 SWISS-PROT:P04264 Tax_Id=9606 Gene_Symbol=KRT1 Keratin, type II cytoskeletal 1	1	27	27	16	38	38	25.2	66.017	644	644	0	323.31	8224100000	126			+	3	16;135;142;185;226;284;354;367;424;443;444;497;500;510;537;563;567;569;573;579;580;619;624;625;734;745;746	True;True;True;True;True;True;True;True;True;True;True;True;True;True;True;True;True;True;True;True;True;True;True;True;True;True;True	16;140;141;149;150;198;240;299;371;384;444;463;464;523;526;537;538;566;593;597;599;603;609;610;651;656;657;771;782;783	29;30;240;241;242;243;254;255;256;257;343;344;403;404;405;496;497;620;621;640;641;736;737;738;767;768;769;770;771;772;773;921;922;923;924;934;935;936;937;938;953;954;955;956;957;1008;1009;1058;1062;1065;1066;1067;1076;1077;1078;1088;1089;1090;1189;1190;1198;1199;1200;1201;1202;1203;1204;1394;1395;1420;1421;1422;1423;1424;1425	36;37;38;39;292;293;294;295;309;310;311;312;313;314;315;316;317;418;419;420;421;422;423;489;490;491;492;493;606;607;608;609;610;611;612;772;773;774;800;801;802;803;804;915;916;917;918;949;950;951;952;953;954;955;1153;1154;1155;1156;1167;1168;1169;1170;1171;1172;1173;1174;1175;1176;1177;1178;1194;1195;1196;1197;1198;1199;1264;1265;1266;1328;1329;1333;1336;1337;1338;1347;1348;1349;1362;1363;1364;13…	38;293;309;419;491;607;774;800;917;949;951;1156;1172;1196;1266;1329;1333;1336;1348;1363;1366;1493;1507;1512;1747;1792;1795	5;6;7;8	259;262;296;469
CON__P08779;CON__Q9Z2K1;CON__Q3ZAW8	CON__P08779	18;7;7	14;5;5	8;1;1	>P08779 SWISS-PROT:P08779 Tax_Id=9606 Gene_Symbol=KRT16 Keratin, type I cytoskeletal 16	3	18	14	8	38.7	33.4	22.8	51.267	473	473;469;474	0	187.28	451960000	29			+	4	53;73;88;108;166;250;300;335;357;373;374;388;415;614;630;688;721;750	True;True;True;True;True;True;True;True;False;False;False;True;True;True;True;True;False;True	54;74;90;112;178;264;316;352;374;390;391;405;433;646;663;724;757;758;787	96;97;131;132;156;157;195;308;309;439;440;524;588;624;625;647;648;670;671;719;1180;1181;1212;1213;1313;1314;1368;1369;1370;1371;1431	116;117;118;119;120;160;161;190;191;239;240;377;378;540;541;542;642;729;777;778;779;780;781;811;812;837;838;894;1480;1481;1524;1525;1644;1645;1646;1647;1714;1715;1716;1717;1718;1719;1720;1721;1722;1723;1812	117;160;191;240;377;540;642;729;780;811;812;838;894;1481;1525;1647;1715;1812	2;9	121;274
CON__P13645;CON__P02535-1;CON__Q7Z3Y7;CON__Q148H6;CON__Q7Z3Z0;CON__Q7Z3Y8;CON__Q2M2I5	CON__P13645	28;10;4;3;2;2;2	28;10;4;3;2;2;2	22;6;2;1;1;1;0	>P13645 SWISS-PROT:P13645 Tax_Id=9606 Gene_Symbol=KRT10 Keratin, type I cytoskeletal 10	7	28	28	22	39.3	39.3	33.2	59.51	593	593;570;486;464;450;459;525	0	323.31	7592300000	110			+	5	54;106;161;252;309;336;349;357;373;374;387;413;493;519;521;544;545;546;551;555;556;571;577;590;591;689;721;751	True;True;True;True;True;True;True;True;True;True;True;True;True;True;True;True;True;True;True;True;True;True;True;True;True;True;True;True	55;110;172;266;325;353;366;374;390;391;404;431;519;548;550;573;574;575;581;585;586;601;607;621;622;725;757;758;788	98;99;191;192;296;297;443;444;539;540;589;590;591;613;624;625;647;648;668;669;714;715;716;914;973;977;978;979;980;1019;1020;1021;1022;1023;1024;1037;1038;1043;1044;1045;1046;1047;1071;1072;1073;1074;1084;1085;1109;1110;1111;1112;1113;1114;1115;1116;1315;1316;1368;1369;1370;1371;1432;1433	121;122;123;124;125;126;127;233;234;235;236;360;361;362;363;547;548;549;550;664;665;666;730;731;732;733;734;735;736;764;777;778;779;780;781;811;812;834;835;836;888;889;890;891;1146;1216;1221;1222;1223;1224;1225;1226;1227;1228;1277;1278;1279;1280;1281;1282;1283;1284;1285;1286;1304;1305;1310;1311;1312;1313;1314;1342;1343;1344;1345;1355;1356;1357;1358;1388;1389;1390;1391;1392;1393;1394;1395;1396;139…	122;236;360;547;664;730;764;780;811;812;835;888;1146;1216;1223;1280;1282;1285;1304;1310;1314;1342;1358;1389;1398;1649;1715;1814	2;10;11	150;306;321
CON__P13647	CON__P13647	15	8	3	>P13647 SWISS-PROT:P13647 Tax_Id=9606 Gene_Symbol=KRT5 Keratin, type II cytoskeletal 5	1	15	8	3	23.4	14.1	5.1	62.378	590	590	0	87.725	344140000	21			+	6	82;173;183;338;363;500;502;508;540;608;634;650;739;745;747	True;False;False;True;True;False;False;True;False;True;True;True;False;False;True	83;185;196;355;380;526;528;534;535;569;640;667;684;685;686;776;782;784	145;146;321;322;338;594;595;633;634;934;935;936;937;938;940;948;949;950;951;1014;1172;1222;1223;1250;1251;1252;1253;1254;1400;1401;1420;1421;1426;1427	174;175;176;390;391;411;740;741;742;793;794;1167;1168;1169;1170;1171;1172;1173;1174;1175;1176;1177;1178;1180;1189;1190;1191;1192;1272;1472;1539;1540;1573;1574;1575;1576;1577;1757;1758;1759;1792;1793;1804;1805	174;391;411;741;794;1172;1180;1189;1272;1472;1540;1574;1757;1792;1804	12;13;14;15	247;274;297;303
CON__P35527	CON__P35527	21	20	20	>P35527 SWISS-PROT:P35527 Tax_Id=9606 Gene_Symbol=KRT9 Keratin, type I cytoskeletal 9	1	21	20	20	44.1	43	43	62.129	623	623	0	313.42	3024900000	102			+	7	130;153;178;197;227;230;231;267;310;333;334;373;475;534;535;547;564;594;618;621;714	True;True;True;True;True;True;True;True;True;True;True;False;True;True;True;True;True;True;True;True;True	135;163;190;191;211;241;244;245;281;326;327;350;351;390;498;499;563;564;576;577;594;625;650;653;750	231;232;277;278;279;280;329;330;331;332;362;363;406;407;411;412;413;414;468;469;470;471;541;542;543;544;545;546;547;548;583;584;585;586;587;647;824;825;826;1002;1003;1004;1005;1025;1026;1027;1028;1059;1147;1148;1187;1188;1192;1193;1194;1195;1357;1358;1359	281;282;341;342;343;344;398;399;400;401;402;403;404;442;443;444;494;495;496;501;502;503;504;505;506;507;508;509;510;511;512;513;577;578;579;580;581;667;668;669;670;671;672;673;674;675;676;719;720;721;722;723;724;725;726;727;728;811;1013;1014;1015;1016;1017;1018;1019;1252;1253;1254;1255;1256;1257;1258;1259;1260;1287;1288;1289;1290;1291;1292;1330;1435;1436;1437;1438;1439;1440;1487;1488;1489;1490;14…	281;344;398;442;494;502;509;578;669;720;728;811;1015;1253;1260;1288;1330;1439;1488;1501;1699	16;17;18;19;20	157;234;245;269;326
CON__P35908;CON__Q6NXH9;CON__P19013	CON__P35908	25;2;2	22;1;2	16;0;0	>P35908 SWISS-PROT:P35908 Tax_Id=9606 Gene_Symbol=KRT2 Keratin, type II cytoskeletal 2 epidermal	3	25	22	16	43.7	40.6	31.3	65.865	645	645;539;594	0	323.31	1979900000	77			+	8	83;136;143;173;185;220;229;232;253;284;356;425;439;498;502;520;570;600;631;632;654;700;745;749;758	True;True;True;True;False;True;True;True;True;False;True;True;True;True;True;True;True;True;True;True;True;True;False;True;True	84;142;143;151;152;185;198;234;243;246;267;299;373;445;459;524;528;549;600;632;664;665;690;736;782;786;795	147;148;244;245;246;258;259;260;261;321;322;343;344;395;396;409;410;415;445;446;496;497;623;739;740;761;925;926;927;928;940;974;975;976;1068;1069;1070;1159;1160;1161;1214;1215;1216;1217;1218;1219;1258;1259;1334;1420;1421;1429;1430;1441;1442	177;178;179;180;181;296;297;298;299;318;319;320;321;322;323;390;391;418;419;420;421;422;423;478;479;480;481;498;499;500;514;551;552;553;606;607;608;609;610;611;612;776;919;920;943;1157;1158;1159;1160;1180;1217;1218;1219;1220;1339;1340;1341;1453;1454;1455;1456;1457;1458;1526;1527;1528;1529;1530;1531;1532;1533;1534;1535;1536;1581;1582;1583;1584;1671;1792;1793;1807;1808;1809;1810;1811;1825;1826;1827…	180;296;319;391;419;479;498;514;552;607;776;919;943;1159;1180;1217;1339;1454;1527;1536;1581;1671;1792;1810;1828	21;22;23;24	263;300;343;473
CON__P48668;CON__P04259	CON__P48668;CON__P04259	17;16	1;1	1;1	>P48668 SWISS-PROT:P48668 Tax_Id=9606 Gene_Symbol=KRT6C Keratin, type II cytoskeletal 6C;>P04259 SWISS-PROT:P04259 Tax_Id=9606 Gene_Symbol=KRT6B Keratin, type II cytoskeletal 6B	2	17	1	1	25.9	1.8	1.8	60.024	564	564;564	0	7.8539	1312900	1			+	9	13;43;83;169;173;183;386;496;500;502;509;540;601;602;739;745;748	False;False;False;False;False;False;False;False;False;False;True;False;False;False;False;False;False	13;44;84;181;185;196;403;522;526;528;536;569;633;634;776;782;785	23;24;78;147;148;314;321;322;338;666;667;918;919;920;934;935;936;937;938;940;952;1014;1162;1163;1400;1401;1420;1421;1428	29;30;31;95;177;178;179;180;181;383;390;391;411;832;833;1150;1151;1152;1167;1168;1169;1170;1171;1172;1173;1174;1175;1176;1177;1178;1180;1193;1272;1459;1460;1757;1758;1759;1792;1793;1806	29;95;180;383;391;411;833;1152;1172;1180;1193;1272;1459;1460;1757;1792;1806	3;25	242;452
CON__Q14CN4-1;CON__Q6IME9;CON__Q3SY84;CON__Q7RTS7;CON__Q32MB2	CON__Q14CN4-1;CON__Q6IME9;CON__Q3SY84;CON__Q7RTS7;CON__Q32MB2	3;3;3;3;2	1;1;1;1;1	1;1;1;1;1	>Q14CN4-1 SWISS-PROT:Q14CN4-1 Tax_Id=9606 Gene_Symbol=KRT72 Isoform 1 of Keratin, type II cytoskeletal 72;>Q6IME9 TREMBL:Q6IME9 Tax_Id=10090 Gene_Symbol=Krt72 Type-II keratin Kb35;>Q3SY84 SWISS-PROT:Q3SY84 Tax_Id=9606 Gene_Symbol=KRT71 Keratin, type II cyt	5	3	1	1	5.9	2.3	2.3	55.877	511	511;520;523;529;540	0	21.476	32306000	5			+	10	173;184;368	False;True;False	185;197;385	321;322;339;340;341;342;642	390;391;412;413;414;415;416;417;805	391;414;805	26	422
CON__Q7Z794	CON__Q7Z794	4	1	1	>Q7Z794 SWISS-PROT:Q7Z794 Tax_Id=9606 Gene_Symbol=KRT77 Keratin 77	1	4	1	1	6.7	2.1	2.1	61.802	578	578	0	10.243	2100200	1			+	11	173;185;655;745	False;False;True;False	185;198;691;782	321;322;343;344;1260;1420;1421	390;391;418;419;420;421;422;423;1585;1792;1793	391;419;1585;1792
CON__Q8VED5;CON__REFSEQ:XP_092267	CON__Q8VED5	6;1	1;1	0;0	>Q8VED5 TREMBL:Q8VED5 Tax_Id=10090 Gene_Symbol=Krt79 Keratin 79	2	6	1	0	8.9	2.1	0	57.552	531	531;213	1	-2	1541000	0	+		+	12	173;183;368;500;502;745	False;False;True;False;False;False	185;196;385;526;528;782	321;322;338;642;934;935;936;937;938;940;1420;1421	390;391;411;805;1167;1168;1169;1170;1171;1172;1173;1174;1175;1176;1177;1178;1180;1792;1793	391;411;805;1172;1180;1792	26	437
CON__Streptavidin	CON__Streptavidin	4	4	4	>Streptavidin (S.avidinii)	1	4	4	4	43.1	43.1	43.1	16.622	160	160	0	100.41	2280500000	157			+	13	326;483;593;744	True;True;True;True	343;509;624;781	573;574;838;839;840;841;842;843;844;845;846;847;848;849;850;851;852;853;854;855;856;857;858;859;860;861;862;863;864;865;866;867;868;869;870;871;872;873;874;875;876;877;878;879;880;881;882;883;884;885;886;887;888;889;890;891;892;893;894;895;896;897;898;899;1118;1119;1120;1121;1122;1123;1124;1125;1126;1127;1128;1129;1130;1131;1132;1133;1134;1135;1136;1137;1138;1139;1140;1141;1142;1143;1144;1145;114…	704;705;706;707;1034;1035;1036;1037;1038;1039;1040;1041;1042;1043;1044;1045;1046;1047;1048;1049;1050;1051;1052;1053;1054;1055;1056;1057;1058;1059;1060;1061;1062;1063;1064;1065;1066;1067;1068;1069;1070;1071;1072;1073;1074;1075;1076;1077;1078;1079;1080;1081;1082;1083;1084;1085;1086;1087;1088;1089;1090;1091;1092;1093;1094;1095;1096;1097;1098;1099;1100;1101;1102;1103;1104;1105;1106;1107;1108;1109;111…	706;1034;1404;1780
REV__sp|Q9HVN5|CLPB_PSEAE	REV__sp|Q9HVN5|CLPB_PSEAE	1	1	1	>sp|Q9HVN5|CLPB_PSEAE Chaperone protein ClpB OS=Pseudomonas aeruginosa (strain ATCC 15692 / PAO1 / 1C / PRS 101 / LMG 12228) GN=clpB PE=3 SV=1	1	1	1	1	0	0	0	95.004	854	854	0.009434	5.8569	2955200	1		+		14	123	TRUE	128	221	268	268
REV__tr|Q9HXW2|Q9HXW2_PSEAE	REV__tr|Q9HXW2|Q9HXW2_PSEAE	1	1	1	>tr|Q9HXW2|Q9HXW2_PSEAE Probable transcriptional regulator OS=Pseudomonas aeruginosa (strain ATCC 15692 / PAO1 / 1C / PRS 101 / LMG 12228) GN=PA3678 PE=4 SV=1	1	1	1	1	0	0	0	23.15	212	212	0.005	6.1184	3979700000	5		+		15	359	TRUE	376	628	784;785;786;787;788	785
sp|G3XD61|WBPI_PSEAE	sp|G3XD61|WBPI_PSEAE	1	1	1	>sp|G3XD61|WBPI_PSEAE UDP-2,3-diacetamido-2,3-dideoxy-D-glucuronate 2-epimerase OS=Pseudomonas aeruginosa (strain ATCC 15692 / PAO1 / 1C / PRS 101 / LMG 12228) GN=wbpI PE=1 SV=1	1	1	1	1	3.7	3.7	3.7	38.907	354	354	0.004878	5.9714	1676700	1				16	407	TRUE	425	701	871	871
sp|G3XD76|DAPD_PSEAE	sp|G3XD76|DAPD_PSEAE	1	1	1	>sp|G3XD76|DAPD_PSEAE 2,3,4,5-tetrahydropyridine-2,6-dicarboxylate N-succinyltransferase OS=Pseudomonas aeruginosa (strain ATCC 15692 / PAO1 / 1C / PRS 101 / LMG 12228) GN=dapD PE=1 SV=1	1	1	1	1	3.5	3.5	3.5	35.973	344	344	0	6.4675	1862900	1				17	645	TRUE	678	1240	1558	1558
sp|O50175|ASTB_PSEAE	sp|O50175|ASTB_PSEAE	1	1	1	>sp|O50175|ASTB_PSEAE N-succinylarginine dihydrolase OS=Pseudomonas aeruginosa (strain ATCC 15692 / PAO1 / 1C / PRS 101 / LMG 12228) GN=astB PE=3 SV=1	1	1	1	1	2.5	2.5	2.5	48.874	448	448	0	8.2384	1754800	4				18	606	TRUE	638	1168;1169	1466;1467;1468;1469	1469
sp|O52759|RS4_PSEAE	sp|O52759|RS4_PSEAE	3	3	3	>sp|O52759|RS4_PSEAE 30S ribosomal protein S4 OS=Pseudomonas aeruginosa (strain ATCC 15692 / PAO1 / 1C / PRS 101 / LMG 12228) GN=rpsD PE=3 SV=2	1	3	3	3	16	16	16	23.277	206	206	0	19.846	21815000	3				19	46;380;445	True;True;True	47;397;465	83;657;774;775	100;823;956;957	100;823;957
sp|O52760|RPOA_PSEAE	sp|O52760|RPOA_PSEAE	6	6	6	>sp|O52760|RPOA_PSEAE DNA-directed RNA polymerase subunit alpha OS=Pseudomonas aeruginosa (strain ATCC 15692 / PAO1 / 1C / PRS 101 / LMG 12228) GN=rpoA PE=3 SV=2	1	6	6	6	19.2	19.2	19.2	36.649	333	333	0	44.078	46128000	8				20	20;116;216;268;341;471	True;True;True;True;True;True	20;120;230;282;358;494	37;38;207;389;472;600;601;818	47;48;49;252;472;582;747;748;1007	48;252;472;582;748;1007
sp|O52761|RL17_PSEAE	sp|O52761|RL17_PSEAE	1	1	1	>sp|O52761|RL17_PSEAE 50S ribosomal protein L17 OS=Pseudomonas aeruginosa (strain ATCC 15692 / PAO1 / 1C / PRS 101 / LMG 12228) GN=rplQ PE=3 SV=1	1	1	1	1	7.8	7.8	7.8	14.504	129	129	0	7.476	13222000	2				21	643	TRUE	676	1236;1237	1554;1555	1555
sp|O52762|CATA_PSEAE	sp|O52762|CATA_PSEAE	5	5	5	>sp|O52762|CATA_PSEAE Catalase OS=Pseudomonas aeruginosa (strain ATCC 15692 / PAO1 / 1C / PRS 101 / LMG 12228) GN=katA PE=1 SV=1	1	5	5	5	10.4	10.4	10.4	55.588	482	482	0	40.305	35693000	7				22	127;390;393;405;481	True;True;True;True;True	132;407;410;423;507	226;674;678;697;698;699;836	275;841;845;866;867;868;869;1032	275;841;845;866;1032	27;28	259;264
sp|O54438|FABG_PSEAE	sp|O54438|FABG_PSEAE	1	1	1	>sp|O54438|FABG_PSEAE 3-oxoacyl-[acyl-carrier-protein] reductase FabG OS=Pseudomonas aeruginosa (strain ATCC 15692 / PAO1 / 1C / PRS 101 / LMG 12228) GN=fabG PE=1 SV=1	1	1	1	1	4.9	4.9	4.9	25.585	247	247	0	7.113	1568400	1				23	237	TRUE	251	423	523	523
sp|O68560|RATA_PSEAE	sp|O68560|RATA_PSEAE	1	1	1	>sp|O68560|RATA_PSEAE Ribosome association toxin RatA OS=Pseudomonas aeruginosa (strain ATCC 15692 / PAO1 / 1C / PRS 101 / LMG 12228) GN=ratA PE=3 SV=1	1	1	1	1	11.1	11.1	11.1	16	144	144	0	6.3996	8103700	2				24	473	TRUE	496	820;821	1009;1010	1010	29	1
sp|O69753|PHZB1_PSEAE;sp|Q9S508|PHZB2_PSEAE	sp|O69753|PHZB1_PSEAE;sp|Q9S508|PHZB2_PSEAE	4;3	4;3	4;3	>sp|O69753|PHZB1_PSEAE Phenazine biosynthesis protein PhzB 1 OS=Pseudomonas aeruginosa (strain ATCC 15692 / PAO1 / 1C / PRS 101 / LMG 12228) GN=phzB1 PE=3 SV=1;>sp|Q9S508|PHZB2_PSEAE Phenazine biosynthesis protein PhzB 2 OS=Pseudomonas aeruginosa (strain A	2	4	4	4	28.4	28.4	28.4	18.888	162	162;162	0	34.969	43116000	8				25	64;151;362;526	True;True;True;True	65;160;161;379;555	114;115;272;273;274;631;632;989;990	143;144;336;337;338;791;792;1238;1239	144;336;791;1239	30	139
sp|O69754|PHZF_PSEAE	sp|O69754|PHZF_PSEAE	1	1	1	>sp|O69754|PHZF_PSEAE Trans-2,3-dihydro-3-hydroxyanthranilate isomerase OS=Pseudomonas aeruginosa (strain ATCC 15692 / PAO1 / 1C / PRS 101 / LMG 12228) GN=phzF1 PE=3 SV=2	1	1	1	1	4	4	4	30.342	278	278	0	7.0805	3093600	2				26	525	TRUE	554	987;988	1236;1237	1236
sp|O82850|RS2_PSEAE	sp|O82850|RS2_PSEAE	2	2	2	>sp|O82850|RS2_PSEAE 30S ribosomal protein S2 OS=Pseudomonas aeruginosa (strain ATCC 15692 / PAO1 / 1C / PRS 101 / LMG 12228) GN=rpsB PE=3 SV=2	1	2	2	2	7.3	7.3	7.3	27.336	246	246	0	11.192	6396700	2				27	299;736	True;True	315;773	523;1397	641;1754	641;1754	31	100
sp|O82851|EFTS_PSEAE	sp|O82851|EFTS_PSEAE	6	6	6	>sp|O82851|EFTS_PSEAE Elongation factor Ts OS=Pseudomonas aeruginosa (strain ATCC 15692 / PAO1 / 1C / PRS 101 / LMG 12228) GN=tsf PE=3 SV=1	1	6	6	6	24.2	24.2	24.2	30.653	289	289	0	41.455	100560000	11				28	181;221;274;297;447;660	True;True;True;True;True;True	194;235;288;289;313;467;696	336;397;481;482;483;518;519;778;779;1266;1267;1268	409;482;591;592;593;636;637;963;964;965;1594;1595;1596	409;482;593;637;965;1596	32	219
sp|O86428|ILVE_PSEAE	sp|O86428|ILVE_PSEAE	3	3	3	>sp|O86428|ILVE_PSEAE Branched-chain-amino-acid aminotransferase OS=Pseudomonas aeruginosa (strain ATCC 15692 / PAO1 / 1C / PRS 101 / LMG 12228) GN=ilvE PE=1 SV=2	1	3	3	3	11.1	11.1	11.1	34.084	307	307	0	18.909	13080000	3				29	101;103;516	True;True;True	105;107;545	185;188;968	227;230;1211	227;230;1211
sp|O87125|CHEB1_PSEAE	sp|O87125|CHEB1_PSEAE	1	1	1	>sp|O87125|CHEB1_PSEAE Chemotaxis response regulator protein-glutamate methylesterase of group 1 operon OS=Pseudomonas aeruginosa (strain ATCC 15692 / PAO1 / 1C / PRS 101 / LMG 12228) GN=cheB1 PE=1 SV=2	1	1	1	1	4.6	4.6	4.6	39.004	368	368	0	6.3135	180100	1				30	667	TRUE	703	1282	1610	1610
sp|P04739|FMPO_PSEAE	sp|P04739|FMPO_PSEAE	2	2	2	>sp|P04739|FMPO_PSEAE Fimbrial protein OS=Pseudomonas aeruginosa (strain ATCC 15692 / PAO1 / 1C / PRS 101 / LMG 12228) GN=pilA PE=1 SV=1	1	2	2	2	20.1	20.1	20.1	15.512	149	149	0	24.524	6085500	3				31	295;636	True;True	311;669	516;1226	633;634;1544	634;1544
sp|P05384|DBHB_PSEAE	sp|P05384|DBHB_PSEAE	2	2	2	>sp|P05384|DBHB_PSEAE DNA-binding protein HU-beta OS=Pseudomonas aeruginosa (strain ATCC 15692 / PAO1 / 1C / PRS 101 / LMG 12228) GN=hupB PE=1 SV=3	1	2	2	2	32.2	32.2	32.2	9.0865	90	90	0	36.516	140570000	10				32	52;557	True;True	53;587	94;95;1048;1049;1050;1051	113;114;115;1315;1316;1317;1318;1319;1320;1321	113;1317
sp|P08308|OTCC_PSEAE	sp|P08308|OTCC_PSEAE	11	11	11	>sp|P08308|OTCC_PSEAE Ornithine carbamoyltransferase, catabolic OS=Pseudomonas aeruginosa (strain ATCC 15692 / PAO1 / 1C / PRS 101 / LMG 12228) GN=arcB PE=1 SV=3	1	11	11	11	32.1	32.1	32.1	38.108	336	336	0	80.236	291210000	24				33	152;159;308;449;480;494;503;511;532;760;766	True;True;True;True;True;True;True;True;True;True;True	162;169;170;324;469;505;506;520;529;539;540;561;797;803	275;276;290;291;292;293;538;781;782;833;834;835;915;916;941;958;959;960;998;999;1445;1446;1456;1457	339;340;354;355;356;357;663;967;968;1028;1029;1030;1031;1147;1148;1181;1200;1201;1202;1248;1249;1834;1835;1846;1847	340;355;663;967;1028;1148;1181;1200;1248;1835;1847	33;34;35;36	101;169;258;261
sp|P09591|EFTU_PSEAE	sp|P09591|EFTU_PSEAE	10	10	10	>sp|P09591|EFTU_PSEAE Elongation factor Tu OS=Pseudomonas aeruginosa (strain ATCC 15692 / PAO1 / 1C / PRS 101 / LMG 12228) GN=tufA PE=1 SV=2	1	10	10	10	31.7	31.7	31.7	43.369	397	397	0	123.03	943090000	31				34	26;35;113;238;263;451;478;499;635;716	True;True;True;True;True;True;True;True;True;True	26;36;117;252;277;471;503;525;668;752	45;46;63;64;203;204;424;425;462;463;464;785;786;830;929;930;931;932;933;1224;1225;1361;1362	58;59;78;79;80;248;249;524;525;526;571;572;573;971;972;973;974;1024;1161;1162;1163;1164;1165;1166;1541;1542;1543;1704;1705;1706;1707	58;78;248;524;571;972;1024;1162;1542;1705	37;38	362;372
sp|P11221|OPRI_PSEAE	sp|P11221|OPRI_PSEAE	2	2	2	>sp|P11221|OPRI_PSEAE Major outer membrane lipoprotein OS=Pseudomonas aeruginosa (strain ATCC 15692 / PAO1 / 1C / PRS 101 / LMG 12228) GN=oprI PE=3 SV=1	1	2	2	2	25.3	25.3	25.3	8.8348	83	83	0	13.925	8462000	10				35	347;446	True;True	364;466	610;611;776;777	758;759;760;761;762;958;959;960;961;962	758;960
sp|P13794|PORF_PSEAE	sp|P13794|PORF_PSEAE	9	9	9	>sp|P13794|PORF_PSEAE Outer membrane porin F OS=Pseudomonas aeruginosa (strain ATCC 15692 / PAO1 / 1C / PRS 101 / LMG 12228) GN=oprF PE=1 SV=1	1	9	9	9	30.6	30.6	30.6	37.639	350	350	0	105.38	365130000	30				36	86;139;501;542;548;550;656;703;755	True;True;True;True;True;True;True;True;True	88;146;527;571;578;580;692;739;792	152;153;250;251;939;1016;1029;1030;1033;1034;1035;1036;1261;1262;1337;1338;1339;1340;1437;1438	185;186;187;303;304;305;306;1179;1274;1293;1294;1295;1298;1299;1300;1301;1302;1303;1586;1587;1588;1589;1590;1674;1675;1676;1677;1678;1821;1822	185;304;1179;1274;1293;1303;1587;1678;1821	39;40	134;136
sp|P13981|ARCA_PSEAE	sp|P13981|ARCA_PSEAE	12	12	12	>sp|P13981|ARCA_PSEAE Arginine deiminase OS=Pseudomonas aeruginosa (strain ATCC 15692 / PAO1 / 1C / PRS 101 / LMG 12228) GN=arcA PE=1 SV=2	1	12	12	12	27.3	27.3	27.3	46.435	418	418	0	125.89	499570000	25				37	40;120;126;339;348;517;530;533;549;599;683;727	True;True;True;True;True;True;True;True;True;True;True;True	41;124;131;356;365;546;559;562;579;631;719;764	71;72;213;224;225;596;597;612;969;970;995;996;1000;1001;1031;1032;1157;1158;1307;1381;1382	87;88;260;271;272;273;274;743;744;763;1212;1213;1245;1246;1250;1251;1296;1297;1449;1450;1451;1452;1637;1638;1733;1734	87;260;274;744;763;1212;1246;1251;1296;1452;1637;1733
sp|P13982|ARCC_PSEAE	sp|P13982|ARCC_PSEAE	3	3	3	>sp|P13982|ARCC_PSEAE Carbamate kinase OS=Pseudomonas aeruginosa (strain ATCC 15692 / PAO1 / 1C / PRS 101 / LMG 12228) GN=arcC PE=3 SV=1	1	3	3	3	10.3	10.3	10.3	33.08	310	310	0	20.064	24380000	6				38	42;400;713	True;True;True	43;418;749	74;75;76;77;690;1356	90;91;92;93;94;859;1696	91;859;1696	41	262
sp|P28810|MMSA_PSEAE	sp|P28810|MMSA_PSEAE	1	1	1	>sp|P28810|MMSA_PSEAE Methylmalonate-semialdehyde dehydrogenase [acylating] OS=Pseudomonas aeruginosa (strain ATCC 15692 / PAO1 / 1C / PRS 101 / LMG 12228) GN=mmsA PE=1 SV=2	1	1	1	1	4.4	4.4	4.4	53.663	497	497	0	14.885	2227700	2				39	719	TRUE	755	1366	1711;1712	1712
sp|P30718|CH60_PSEAE	sp|P30718|CH60_PSEAE	17	17	17	>sp|P30718|CH60_PSEAE 60 kDa chaperonin OS=Pseudomonas aeruginosa (strain ATCC 15692 / PAO1 / 1C / PRS 101 / LMG 12228) GN=groL PE=1 SV=3	1	17	17	17	31.8	31.8	31.8	57.085	547	547	0	191.38	600670000	45				40	7;62;92;93;122;162;163;179;210;352;353;468;536;538;558;658;666	True;True;True;True;True;True;True;True;True;True;True;True;True;True;True;True;True	7;63;94;95;96;97;126;127;173;174;175;192;224;369;370;489;490;565;567;588;694;702	13;14;110;111;166;167;168;169;170;171;172;173;216;217;218;219;220;298;299;300;301;302;303;333;382;618;619;810;811;812;813;1006;1007;1010;1011;1052;1264;1280;1281	16;17;18;19;139;140;202;203;204;205;206;207;208;209;263;264;265;266;267;364;365;366;367;368;369;370;371;405;465;770;771;998;999;1000;1001;1002;1261;1262;1263;1267;1268;1322;1592;1608;1609	18;139;203;207;266;364;371;405;465;770;771;1002;1261;1268;1322;1592;1608	42;43;44;45;46	16;69;111;114;233
sp|P30720|CH10_PSEAE	sp|P30720|CH10_PSEAE	2	2	2	>sp|P30720|CH10_PSEAE 10 kDa chaperonin OS=Pseudomonas aeruginosa (strain ATCC 15692 / PAO1 / 1C / PRS 101 / LMG 12228) GN=groS PE=3 SV=1	1	2	2	2	41.2	41.2	41.2	10.267	97	97	0	15.795	26343000	4				41	604;728	True;True	636;765	1165;1383;1384	1462;1463;1735;1736	1462;1735
sp|P32722|PORD_PSEAE	sp|P32722|PORD_PSEAE	2	2	2	>sp|P32722|PORD_PSEAE Porin D OS=Pseudomonas aeruginosa (strain ATCC 15692 / PAO1 / 1C / PRS 101 / LMG 12228) GN=oprD PE=1 SV=1	1	2	2	2	7.4	7.4	7.4	48.36	443	443	0	12.036	1640900	4				42	523;613	True;True	552;645	983;984;1179	1231;1232;1233;1479	1231;1479	47	111
sp|P37798|ACCC_PSEAE	sp|P37798|ACCC_PSEAE	4	4	4	>sp|P37798|ACCC_PSEAE Biotin carboxylase OS=Pseudomonas aeruginosa (strain ATCC 15692 / PAO1 / 1C / PRS 101 / LMG 12228) GN=accC PE=1 SV=1	1	4	4	4	11.6	11.6	11.6	48.887	449	449	0	30.159	13293000	5				43	202;484;562;679	True;True;True;True	216;510;592;715	372;900;901;1057;1301	453;1132;1133;1327;1631	453;1132;1327;1631
sp|P37799|BCCP_PSEAE	sp|P37799|BCCP_PSEAE	4	4	4	>sp|P37799|BCCP_PSEAE Biotin carboxyl carrier protein of acetyl-CoA carboxylase OS=Pseudomonas aeruginosa (strain ATCC 15692 / PAO1 / 1C / PRS 101 / LMG 12228) GN=accB PE=3 SV=1	1	4	4	4	46.8	46.8	46.8	16.455	156	156	0	70.826	833770000	17				44	6;428;587;603	True;True;True;True	6;448;617;618;635	11;12;745;1099;1100;1101;1102;1103;1104;1105;1164	11;12;13;14;15;925;926;1376;1377;1378;1379;1380;1381;1382;1383;1384;1461	12;925;1382;1461	48	87
sp|P38100|CARB_PSEAE	sp|P38100|CARB_PSEAE	1	1	1	>sp|P38100|CARB_PSEAE Carbamoyl-phosphate synthase large chain OS=Pseudomonas aeruginosa (strain ATCC 15692 / PAO1 / 1C / PRS 101 / LMG 12228) GN=carB PE=3 SV=3	1	1	1	1	0.8	0.8	0.8	117.33	1073	1073	0.0049505	5.999	2378800	1				45	438	TRUE	458	760	942	942
sp|P43334|PH4H_PSEAE	sp|P43334|PH4H_PSEAE	1	1	1	>sp|P43334|PH4H_PSEAE Phenylalanine-4-hydroxylase OS=Pseudomonas aeruginosa (strain ATCC 15692 / PAO1 / 1C / PRS 101 / LMG 12228) GN=phhA PE=3 SV=2	1	1	1	1	3.4	3.4	3.4	30.321	262	262	0	7.025	1403400	1				46	331	TRUE	348	580	715	715
sp|P43336|PHHC_PSEAE	sp|P43336|PHHC_PSEAE	2	2	2	>sp|P43336|PHHC_PSEAE Aromatic-amino-acid aminotransferase OS=Pseudomonas aeruginosa (strain ATCC 15692 / PAO1 / 1C / PRS 101 / LMG 12228) GN=phhC PE=3 SV=2	1	2	2	2	7.3	7.3	7.3	43.273	399	399	0	15.398	13094000	4				47	10;294	True;True	10;310	19;20;514;515	24;25;631;632	25;632
sp|P47204|FTSZ_PSEAE	sp|P47204|FTSZ_PSEAE	1	1	1	>sp|P47204|FTSZ_PSEAE Cell division protein FtsZ OS=Pseudomonas aeruginosa (strain ATCC 15692 / PAO1 / 1C / PRS 101 / LMG 12228) GN=ftsZ PE=1 SV=2	1	1	1	1	3	3	3	41.218	394	394	0	7.1795	1520600	1				48	240	TRUE	254	427	528	528
sp|P53593|SUCC_PSEAE	sp|P53593|SUCC_PSEAE	7	7	7	>sp|P53593|SUCC_PSEAE Succinyl-CoA ligase [ADP-forming] subunit beta OS=Pseudomonas aeruginosa (strain ATCC 15692 / PAO1 / 1C / PRS 101 / LMG 12228) GN=sucC PE=3 SV=2	1	7	7	7	20.6	20.6	20.6	41.542	388	388	0	92.82	132190000	13				49	24;89;156;291;324;507;541	True;True;True;True;True;True;True	24;91;166;307;341;533;570	42;43;158;159;285;286;508;509;569;570;946;947;1015	54;55;56;192;193;349;350;625;626;700;701;1186;1187;1188;1273	56;192;350;626;701;1186;1273
sp|P53641|SODF_PSEAE	sp|P53641|SODF_PSEAE	3	3	3	>sp|P53641|SODF_PSEAE Superoxide dismutase [Fe] OS=Pseudomonas aeruginosa (strain ATCC 15692 / PAO1 / 1C / PRS 101 / LMG 12228) GN=sodB PE=3 SV=3	1	3	3	3	18.7	18.7	18.7	21.351	193	193	0	18.222	39560000	4				50	27;485;574	True;True;True	27;511;604	47;48;902;1079	60;61;1134;1350	60;1134;1350
sp|P57668|TPX_PSEAE	sp|P57668|TPX_PSEAE	1	1	1	>sp|P57668|TPX_PSEAE Probable thiol peroxidase OS=Pseudomonas aeruginosa (strain ATCC 15692 / PAO1 / 1C / PRS 101 / LMG 12228) GN=tpx PE=3 SV=1	1	1	1	1	7.9	7.9	7.9	17.234	165	165	0	7.5936	2477000	1				51	246	TRUE	260	433	534	534
sp|P72173|AAT_PSEAE	sp|P72173|AAT_PSEAE	3	3	3	>sp|P72173|AAT_PSEAE Aspartate aminotransferase OS=Pseudomonas aeruginosa (strain ATCC 15692 / PAO1 / 1C / PRS 101 / LMG 12228) GN=aspC PE=3 SV=2	1	3	3	3	9.5	9.5	9.5	43.319	398	398	0	26.082	10084000	3				52	38;668;730	True;True;True	39;704;767	68;1283;1284;1387	84;1611;1612;1739	84;1612;1739
sp|P95454|RLME_PSEAE	sp|P95454|RLME_PSEAE	1	1	1	>sp|P95454|RLME_PSEAE Ribosomal RNA large subunit methyltransferase E OS=Pseudomonas aeruginosa (strain ATCC 15692 / PAO1 / 1C / PRS 101 / LMG 12228) GN=rlmE PE=3 SV=2	1	1	1	1	4.3	4.3	4.3	23.499	207	207	1	-2	1117400	0	+			53	459	TRUE	479	798	986	986	49	1
sp|Q51422|SYDND_PSEAE	sp|Q51422|SYDND_PSEAE	3	3	3	>sp|Q51422|SYDND_PSEAE Aspartate--tRNA(Asp/Asn) ligase OS=Pseudomonas aeruginosa (strain ATCC 15692 / PAO1 / 1C / PRS 101 / LMG 12228) GN=aspS PE=1 SV=2	1	3	3	3	7.8	7.8	7.8	66.207	591	591	0	45.232	5083600	6				54	329;629;756	True;True;True	346;662;793	577;578;1210;1211;1439	710;711;712;713;1522;1523;1823	710;1523;1823	50	565
sp|Q51561|RPOB_PSEAE	sp|Q51561|RPOB_PSEAE	10	10	10	>sp|Q51561|RPOB_PSEAE DNA-directed RNA polymerase subunit beta OS=Pseudomonas aeruginosa (strain ATCC 15692 / PAO1 / 1C / PRS 101 / LMG 12228) GN=rpoB PE=3 SV=2	1	10	10	10	9.2	9.2	9.2	150.84	1357	1357	0	80.458	56946000	10				55	69;149;186;344;360;432;440;469;586;592	True;True;True;True;True;True;True;True;True;True	70;158;199;361;377;452;460;491;616;623	123;124;269;345;605;606;629;751;752;762;763;814;1097;1098;1117	152;153;332;424;752;753;789;933;934;944;945;1003;1374;1375;1403	152;332;424;752;789;933;944;1003;1374;1403	51;52	658;1225
sp|Q51567|SUCD_PSEAE	sp|Q51567|SUCD_PSEAE	5	5	5	>sp|Q51567|SUCD_PSEAE Succinyl-CoA ligase [ADP-forming] subunit alpha OS=Pseudomonas aeruginosa (strain ATCC 15692 / PAO1 / 1C / PRS 101 / LMG 12228) GN=sucD PE=3 SV=2	1	5	5	5	22.7	22.7	22.7	30.266	295	295	0	39.841	75426000	9				56	50;67;133;170;292	True;True;True;True;True	51;68;138;182;308	91;92;120;237;238;315;316;510;511	110;111;149;288;289;290;384;385;627;628	110;149;288;384;627
sp|Q59636|NDK_PSEAE	sp|Q59636|NDK_PSEAE	2	2	2	>sp|Q59636|NDK_PSEAE Nucleoside diphosphate kinase OS=Pseudomonas aeruginosa (strain ATCC 15692 / PAO1 / 1C / PRS 101 / LMG 12228) GN=ndk PE=3 SV=2	1	2	2	2	14.7	14.7	14.7	15.592	143	143	0	19.257	43910000	3				57	518;622	True;True	547;654	971;972;1196	1214;1215;1504	1215;1504
sp|Q59637|ODP1_PSEAE	sp|Q59637|ODP1_PSEAE	5	5	5	>sp|Q59637|ODP1_PSEAE Pyruvate dehydrogenase E1 component OS=Pseudomonas aeruginosa (strain ATCC 15692 / PAO1 / 1C / PRS 101 / LMG 12228) GN=aceE PE=3 SV=2	1	5	5	5	5.6	5.6	5.6	99.563	882	882	0	35.044	47223000	9				58	134;200;290;304;337	True;True;True;True;True	139;214;306;320;354	239;368;369;507;529;530;592;593	291;449;450;624;647;648;737;738;739	291;449;624;648;737
sp|Q59638|ODP2_PSEAE	sp|Q59638|ODP2_PSEAE	8	8	8	>sp|Q59638|ODP2_PSEAE Dihydrolipoyllysine-residue acetyltransferase component of pyruvate dehydrogenase complex OS=Pseudomonas aeruginosa (strain ATCC 15692 / PAO1 / 1C / PRS 101 / LMG 12228) GN=aceF PE=2 SV=2	1	8	8	8	23.8	23.8	23.8	56.708	547	547	0	59.395	72782000	22				59	14;15;17;398;412;422;450;669	True;True;True;True;True;True;True;True	14;15;17;415;430;441;470;705	25;26;27;28;31;32;686;687;712;713;732;733;783;784;1285;1286	32;33;34;35;40;41;42;854;855;882;883;884;885;886;887;911;912;969;970;1613;1614;1615	32;34;40;854;887;912;969;1613	53	328
sp|Q9HT16|ATPF_PSEAE	sp|Q9HT16|ATPF_PSEAE	3	3	3	>sp|Q9HT16|ATPF_PSEAE ATP synthase subunit b OS=Pseudomonas aeruginosa (strain ATCC 15692 / PAO1 / 1C / PRS 101 / LMG 12228) GN=atpF PE=3 SV=1	1	3	3	3	24.4	24.4	24.4	16.956	156	156	0	18.822	17856000	2				60	77;272;315	True;True;True	78;286;332	138;139;478;556	167;168;588;686	168;588;686
sp|Q9HT18|ATPA_PSEAE	sp|Q9HT18|ATPA_PSEAE	10	10	10	>sp|Q9HT18|ATPA_PSEAE ATP synthase subunit alpha OS=Pseudomonas aeruginosa (strain ATCC 15692 / PAO1 / 1C / PRS 101 / LMG 12228) GN=atpA PE=3 SV=1	1	10	10	10	23.5	23.5	23.5	55.393	514	514	0	114.92	242270000	22				61	148;208;218;314;470;488;595;596;605;726	True;True;True;True;True;True;True;True;True;True	157;222;232;331;492;493;514;626;627;628;637;763	267;268;379;380;392;393;554;555;815;816;817;906;907;1149;1150;1151;1152;1166;1167;1379;1380	330;331;460;461;462;463;475;476;682;683;684;685;1004;1005;1006;1138;1139;1441;1442;1443;1444;1464;1465;1731;1732	330;462;476;683;1006;1139;1441;1444;1464;1731	54;55	1;157
sp|Q9HT19|ATPG_PSEAE	sp|Q9HT19|ATPG_PSEAE	1	1	1	>sp|Q9HT19|ATPG_PSEAE ATP synthase gamma chain OS=Pseudomonas aeruginosa (strain ATCC 15692 / PAO1 / 1C / PRS 101 / LMG 12228) GN=atpG PE=3 SV=1	1	1	1	1	3.1	3.1	3.1	31.553	286	286	0	7.0253	5780400	2				62	576	TRUE	606	1082;1083	1353;1354	1354
sp|Q9HT20|ATPB_PSEAE	sp|Q9HT20|ATPB_PSEAE	8	8	8	>sp|Q9HT20|ATPB_PSEAE ATP synthase subunit beta OS=Pseudomonas aeruginosa (strain ATCC 15692 / PAO1 / 1C / PRS 101 / LMG 12228) GN=atpD PE=3 SV=1	1	8	8	8	27.9	27.9	27.9	49.499	458	458	0	102.26	81922000	17				63	121;146;244;322;539;646;672;767	True;True;True;True;True;True;True;True	125;155;258;339;568;679;680;708;804	214;215;264;265;431;567;1012;1013;1241;1242;1243;1290;1291;1458;1459	261;262;326;327;328;532;698;1269;1270;1271;1559;1560;1561;1619;1620;1848;1849	262;328;532;698;1271;1559;1619;1849	56;57	87;225
sp|Q9HT21|ATPE_PSEAE	sp|Q9HT21|ATPE_PSEAE	2	2	2	>sp|Q9HT21|ATPE_PSEAE ATP synthase epsilon chain OS=Pseudomonas aeruginosa (strain ATCC 15692 / PAO1 / 1C / PRS 101 / LMG 12228) GN=atpC PE=3 SV=1	1	2	2	2	16.3	16.3	16.3	14.726	141	141	0	15.18	3896700	3				64	33;361	True;True	34;378	61;630	75;76;790	76;790
sp|Q9HT95|ATSE4_PSEAE	sp|Q9HT95|ATSE4_PSEAE	1	1	1	>sp|Q9HT95|ATSE4_PSEAE Acetyltransferase PA5475 OS=Pseudomonas aeruginosa (strain ATCC 15692 / PAO1 / 1C / PRS 101 / LMG 12228) GN=PA5475 PE=3 SV=1	1	1	1	1	5.9	5.9	5.9	21	186	186	0	7.4462	1526800	2				65	128	TRUE	133	227;228	276;277	277
sp|Q9HTN8|RL28_PSEAE	sp|Q9HTN8|RL28_PSEAE	1	1	1	>sp|Q9HTN8|RL28_PSEAE 50S ribosomal protein L28 OS=Pseudomonas aeruginosa (strain ATCC 15692 / PAO1 / 1C / PRS 101 / LMG 12228) GN=rpmB PE=3 SV=1	1	1	1	1	12.8	12.8	12.8	9.0655	78	78	0	6.9685	6481600	3				66	235	TRUE	249	420;421	519;520;521	520
sp|Q9HTZ7|PCKA_PSEAE	sp|Q9HTZ7|PCKA_PSEAE	1	1	1	>sp|Q9HTZ7|PCKA_PSEAE Phosphoenolpyruvate carboxykinase [ATP] OS=Pseudomonas aeruginosa (strain ATCC 15692 / PAO1 / 1C / PRS 101 / LMG 12228) GN=pckA PE=3 SV=1	1	1	1	1	2.5	2.5	2.5	55.731	513	513	0	7.4555	1303700	2				67	476	TRUE	500;501	827;828	1020;1021;1022	1021	58	111
sp|Q9HU65|GLNA_PSEAE	sp|Q9HU65|GLNA_PSEAE	1	1	1	>sp|Q9HU65|GLNA_PSEAE Glutamine synthetase OS=Pseudomonas aeruginosa (strain ATCC 15692 / PAO1 / 1C / PRS 101 / LMG 12228) GN=glnA PE=1 SV=1	1	1	1	1	2.6	2.6	2.6	51.944	469	469	0	8.9701	2620300	1				68	109	TRUE	113	196	241	241
sp|Q9HUC8|SYR_PSEAE	sp|Q9HUC8|SYR_PSEAE	2	2	2	>sp|Q9HUC8|SYR_PSEAE Arginine--tRNA ligase OS=Pseudomonas aeruginosa (strain ATCC 15692 / PAO1 / 1C / PRS 101 / LMG 12228) GN=argS PE=3 SV=1	1	2	2	2	3.7	3.7	3.7	65.199	587	587	0	19.317	8086500	3				69	408;690	True;True	426;726	702;703;1317	872;873;1653	872;1653
sp|Q9HUM0|HFQ_PSEAE	sp|Q9HUM0|HFQ_PSEAE	2	2	2	>sp|Q9HUM0|HFQ_PSEAE RNA-binding protein Hfq OS=Pseudomonas aeruginosa (strain ATCC 15692 / PAO1 / 1C / PRS 101 / LMG 12228) GN=hfq PE=1 SV=1	1	2	2	2	30.5	30.5	30.5	9.1034	82	82	0	10.927	7076500	2				70	264;712	True;True	278;748	465;1355	574;1695	574;1695
sp|Q9HUM6|PURA_PSEAE	sp|Q9HUM6|PURA_PSEAE	3	3	3	>sp|Q9HUM6|PURA_PSEAE Adenylosuccinate synthetase OS=Pseudomonas aeruginosa (strain ATCC 15692 / PAO1 / 1C / PRS 101 / LMG 12228) GN=purA PE=3 SV=1	1	3	3	3	8.8	8.8	8.8	46.814	430	430	0	19.53	12693000	5				71	382;617;765	True;True;True	399;649;802	659;660;1185;1186;1455	825;826;1485;1486;1845	825;1485;1845
sp|Q9HUM9|RS6_PSEAE	sp|Q9HUM9|RS6_PSEAE	2	2	2	>sp|Q9HUM9|RS6_PSEAE 30S ribosomal protein S6 OS=Pseudomonas aeruginosa (strain ATCC 15692 / PAO1 / 1C / PRS 101 / LMG 12228) GN=rpsF PE=3 SV=1	1	2	2	2	15.8	15.8	15.8	16.164	139	139	0	20.267	26018000	4				72	49;114	True;True	50;118	89;90;205	106;107;108;109;250	106;250	59	102
sp|Q9HUN2|RL9_PSEAE	sp|Q9HUN2|RL9_PSEAE	2	2	2	>sp|Q9HUN2|RL9_PSEAE 50S ribosomal protein L9 OS=Pseudomonas aeruginosa (strain ATCC 15692 / PAO1 / 1C / PRS 101 / LMG 12228) GN=rplI PE=3 SV=1	1	2	2	2	18.9	18.9	18.9	15.532	148	148	0	10.796	8188500	2				73	462;515	True;True	482;544	802;967	990;1210	990;1210	60	1
sp|Q9HV43|DNAK_PSEAE	sp|Q9HV43|DNAK_PSEAE	9	9	9	>sp|Q9HV43|DNAK_PSEAE Chaperone protein DnaK OS=Pseudomonas aeruginosa (strain ATCC 15692 / PAO1 / 1C / PRS 101 / LMG 12228) GN=dnaK PE=3 SV=1	1	9	9	9	20.1	20.1	20.1	68.402	637	637	0	117.89	131690000	19				74	0;48;56;105;303;389;409;479;589	True;True;True;True;True;True;True;True;True	0;49;57;109;319;406;427;504;620	0;1;2;3;86;87;88;102;103;190;527;528;672;673;704;705;831;832;1108	0;1;2;3;103;104;105;130;131;232;645;646;839;840;874;875;1025;1026;1027;1387	3;104;130;232;645;839;874;1027;1387	61	602
sp|Q9HV59|PNP_PSEAE	sp|Q9HV59|PNP_PSEAE	6	6	6	>sp|Q9HV59|PNP_PSEAE Polyribonucleotide nucleotidyltransferase OS=Pseudomonas aeruginosa (strain ATCC 15692 / PAO1 / 1C / PRS 101 / LMG 12228) GN=pnp PE=3 SV=1	1	6	6	6	9.3	9.3	9.3	75.452	701	701	0	37.813	55903000	9				75	68;75;137;155;287;698	True;True;True;True;True;True	69;76;144;165;303;734	121;122;135;136;247;248;284;503;1331;1332	150;151;164;165;300;301;348;620;1667;1668	150;164;301;348;620;1667	62	467
sp|Q9HVC4|RL25_PSEAE	sp|Q9HVC4|RL25_PSEAE	5	5	5	>sp|Q9HVC4|RL25_PSEAE 50S ribosomal protein L25 OS=Pseudomonas aeruginosa (strain ATCC 15692 / PAO1 / 1C / PRS 101 / LMG 12228) GN=rplY PE=3 SV=1	1	5	5	5	37.7	37.7	37.7	21.962	204	204	0	47.799	86085000	10				76	124;222;258;417;664	True;True;True;True;True	129;236;272;435;700	222;398;452;453;721;722;1275;1276;1277;1278	269;483;559;560;561;896;897;1603;1604;1605;1606	269;483;559;897;1606	63	90
sp|Q9HVC5|KPRS_PSEAE	sp|Q9HVC5|KPRS_PSEAE	1	1	1	>sp|Q9HVC5|KPRS_PSEAE Ribose-phosphate pyrophosphokinase OS=Pseudomonas aeruginosa (strain ATCC 15692 / PAO1 / 1C / PRS 101 / LMG 12228) GN=prs PE=3 SV=1	1	1	1	1	4.2	4.2	4.2	34.04	313	313	1	-2	4169300	0	+			77	725	TRUE	762	1377;1378	1729;1730	1729	64	116
sp|Q9HVD1|PAGL_PSEAE	sp|Q9HVD1|PAGL_PSEAE	2	2	2	>sp|Q9HVD1|PAGL_PSEAE Lipid A deacylase PagL OS=Pseudomonas aeruginosa (strain ATCC 15692 / PAO1 / 1C / PRS 101 / LMG 12228) GN=pagL PE=1 SV=1	1	2	2	2	13.9	13.9	13.9	18.393	173	173	0	14.248	2755900	2				78	402;670	True;True	420;706	693;1287	862;1616	862;1616
sp|Q9HVI7|GLYA3_PSEAE	sp|Q9HVI7|GLYA3_PSEAE	2	2	2	>sp|Q9HVI7|GLYA3_PSEAE Serine hydroxymethyltransferase 3 OS=Pseudomonas aeruginosa (strain ATCC 15692 / PAO1 / 1C / PRS 101 / LMG 12228) GN=glyA2 PE=3 SV=1	1	2	2	2	4.1	4.1	4.1	45.157	417	417	0	11.888	5434700	1				79	585;639	True;True	615;672	1096;1232	1373;1550	1373;1550
sp|Q9HVL6|RL21_PSEAE	sp|Q9HVL6|RL21_PSEAE	1	1	1	>sp|Q9HVL6|RL21_PSEAE 50S ribosomal protein L21 OS=Pseudomonas aeruginosa (strain ATCC 15692 / PAO1 / 1C / PRS 101 / LMG 12228) GN=rplU PE=3 SV=1	1	1	1	1	10.7	10.7	10.7	11.653	103	103	0	6.9818	12890000	0				80	697	TRUE	733	1329;1330	1665;1666	1666
sp|Q9HVM1|RS20_PSEAE	sp|Q9HVM1|RS20_PSEAE	1	1	1	>sp|Q9HVM1|RS20_PSEAE 30S ribosomal protein S20 OS=Pseudomonas aeruginosa (strain ATCC 15692 / PAO1 / 1C / PRS 101 / LMG 12228) GN=rpsT PE=1 SV=3	1	1	1	1	15.4	15.4	15.4	9.9175	91	91	0	6.1779	3485600	1				81	78	TRUE	79	140	169	169
sp|Q9HVM4|SYI_PSEAE	sp|Q9HVM4|SYI_PSEAE	1	1	1	>sp|Q9HVM4|SYI_PSEAE Isoleucine--tRNA ligase OS=Pseudomonas aeruginosa (strain ATCC 15692 / PAO1 / 1C / PRS 101 / LMG 12228) GN=ileS PE=3 SV=1	1	1	1	1	1.1	1.1	1.1	105.46	943	943	0.0093458	5.846	1555400	1				82	211	TRUE	225	383	466	466
sp|Q9HVN5|CLPB_PSEAE	sp|Q9HVN5|CLPB_PSEAE	4	4	3	>sp|Q9HVN5|CLPB_PSEAE Chaperone protein ClpB OS=Pseudomonas aeruginosa (strain ATCC 15692 / PAO1 / 1C / PRS 101 / LMG 12228) GN=clpB PE=3 SV=1	1	4	4	3	6	6	4.4	95.004	854	854	0	35.465	4799100	4				83	22;223;280;512	True;True;True;True	22;237;295;541	40;399;400;492;961	52;484;485;602;1203	52;484;602;1203
sp|Q9HVT8|GATA_PSEAE	sp|Q9HVT8|GATA_PSEAE	1	1	1	>sp|Q9HVT8|GATA_PSEAE Glutamyl-tRNA(Gln) amidotransferase subunit A OS=Pseudomonas aeruginosa (strain ATCC 15692 / PAO1 / 1C / PRS 101 / LMG 12228) GN=gatA PE=1 SV=1	1	1	1	1	3.3	3.3	3.3	51.862	484	484	0	12.042	945160	3				84	709	TRUE	745	1349;1350	1688;1689;1690	1688
sp|Q9HVY3|RS9_PSEAE	sp|Q9HVY3|RS9_PSEAE	1	1	1	>sp|Q9HVY3|RS9_PSEAE 30S ribosomal protein S9 OS=Pseudomonas aeruginosa (strain ATCC 15692 / PAO1 / 1C / PRS 101 / LMG 12228) GN=rpsI PE=3 SV=1	1	1	1	1	7.7	7.7	7.7	14.615	130	130	0	6.7553	2033800	1				85	59	TRUE	60	106	134	134
sp|Q9HW04|ARGJ_PSEAE	sp|Q9HW04|ARGJ_PSEAE	1	1	1	>sp|Q9HW04|ARGJ_PSEAE Arginine biosynthesis bifunctional protein ArgJ OS=Pseudomonas aeruginosa (strain ATCC 15692 / PAO1 / 1C / PRS 101 / LMG 12228) GN=argJ PE=3 SV=1	1	1	1	1	2.7	2.7	2.7	41.762	405	405	0	6.4932	3954000	0				86	647	TRUE	681	1244;1245	1562;1563	1563
sp|Q9HW11|Y4395_PSEAE	sp|Q9HW11|Y4395_PSEAE	1	1	1	>sp|Q9HW11|Y4395_PSEAE UPF0234 protein PA4395 OS=Pseudomonas aeruginosa (strain ATCC 15692 / PAO1 / 1C / PRS 101 / LMG 12228) GN=PA4395 PE=3 SV=1	1	1	1	1	8.2	8.2	8.2	18.044	159	159	0	6.5568	1475000	1				87	355	TRUE	372	622	775	775
sp|Q9HWC5|RL11_PSEAE	sp|Q9HWC5|RL11_PSEAE	2	2	2	>sp|Q9HWC5|RL11_PSEAE 50S ribosomal protein L11 OS=Pseudomonas aeruginosa (strain ATCC 15692 / PAO1 / 1C / PRS 101 / LMG 12228) GN=rplK PE=3 SV=1	1	2	2	2	15.4	15.4	15.4	14.907	143	143	0	11.665	8744500	2				88	79;529	True;True	80;558	141;994	170;1244	170;1244
sp|Q9HWC6|RL1_PSEAE	sp|Q9HWC6|RL1_PSEAE	1	1	1	>sp|Q9HWC6|RL1_PSEAE 50S ribosomal protein L1 OS=Pseudomonas aeruginosa (strain ATCC 15692 / PAO1 / 1C / PRS 101 / LMG 12228) GN=rplA PE=3 SV=1	1	1	1	1	6.1	6.1	6.1	24.234	231	231	0	6.6897	5519600	1				89	441	TRUE	461	764	946	946
sp|Q9HWC7|RL10_PSEAE	sp|Q9HWC7|RL10_PSEAE	4	4	4	>sp|Q9HWC7|RL10_PSEAE 50S ribosomal protein L10 OS=Pseudomonas aeruginosa (strain ATCC 15692 / PAO1 / 1C / PRS 101 / LMG 12228) GN=rplJ PE=3 SV=1	1	4	4	4	32.5	32.5	32.5	17.634	166	166	0	50.465	56708000	12				90	5;47;95;248	True;True;True;True	5;48;99;262	10;84;85;176;177;435;436;437	10;101;102;212;213;214;215;216;217;536;537;538	10;101;214;538
sp|Q9HWC8|RL7_PSEAE	sp|Q9HWC8|RL7_PSEAE	1	1	1	>sp|Q9HWC8|RL7_PSEAE 50S ribosomal protein L7/L12 OS=Pseudomonas aeruginosa (strain ATCC 15692 / PAO1 / 1C / PRS 101 / LMG 12228) GN=rplL PE=3 SV=1	1	1	1	1	9	9	9	12.479	122	122	0.0049751	6.0115	28911000	1				91	97	TRUE	101	179	219	219
sp|Q9HWC9|RPOC_PSEAE	sp|Q9HWC9|RPOC_PSEAE	10	10	10	>sp|Q9HWC9|RPOC_PSEAE DNA-directed RNA polymerase subunit beta OS=Pseudomonas aeruginosa (strain ATCC 15692 / PAO1 / 1C / PRS 101 / LMG 12228) GN=rpoC PE=3 SV=1	1	10	10	10	8.4	8.4	8.4	154.38	1399	1399	0	72.504	63189000	14				92	174;214;293;302;401;414;442;514;641;757	True;True;True;True;True;True;True;True;True;True	186;228;309;318;419;432;462;543;674;794	323;387;512;513;526;691;692;717;718;765;766;965;966;1234;1440	392;470;629;630;644;860;861;892;893;947;948;1207;1208;1209;1552;1824	392;470;629;644;860;892;948;1207;1552;1824	65	29
sp|Q9HWD1|RS7_PSEAE	sp|Q9HWD1|RS7_PSEAE	1	1	1	>sp|Q9HWD1|RS7_PSEAE 30S ribosomal protein S7 OS=Pseudomonas aeruginosa (strain ATCC 15692 / PAO1 / 1C / PRS 101 / LMG 12228) GN=rpsG PE=3 SV=1	1	1	1	1	7.7	7.7	7.7	17.504	156	156	0	8.2584	10630000	2				93	365	TRUE	382	637;638	797;798	797
sp|Q9HWD2|EFG1_PSEAE;sp|Q9I244|EFG2_PSEAE	sp|Q9HWD2|EFG1_PSEAE	14;4	14;4	14;4	>sp|Q9HWD2|EFG1_PSEAE Elongation factor G 1 OS=Pseudomonas aeruginosa (strain ATCC 15692 / PAO1 / 1C / PRS 101 / LMG 12228) GN=fusA PE=1 SV=1	2	14	14	14	26.5	26.5	26.5	77.784	706	706;702	0	163.25	199870000	27				94	32;150;195;242;260;277;369;399;460;492;692;733;741;759	True;True;True;True;True;True;True;True;True;True;True;True;True;True	32;33;159;209;256;274;292;386;416;417;480;518;728;770;778;796	57;58;59;60;270;271;359;360;429;455;456;486;487;643;688;689;799;912;913;1320;1321;1393;1403;1404;1443;1444	71;72;73;74;333;334;335;439;440;530;563;564;596;597;806;856;857;858;987;1144;1145;1656;1657;1745;1761;1762;1832;1833	73;333;439;530;564;596;806;856;987;1145;1657;1745;1761;1833	66;67;68;69	53;388;409;648
sp|Q9HWD5|RL3_PSEAE	sp|Q9HWD5|RL3_PSEAE	2	2	2	>sp|Q9HWD5|RL3_PSEAE 50S ribosomal protein L3 OS=Pseudomonas aeruginosa (strain ATCC 15692 / PAO1 / 1C / PRS 101 / LMG 12228) GN=rplC PE=3 SV=1	1	2	2	2	13.3	13.3	13.3	22.591	211	211	0	18.692	20134000	3				95	206;724	True;True	220;761	377;1375;1376	458;1727;1728	458;1728
sp|Q9HWD8|RL2_PSEAE	sp|Q9HWD8|RL2_PSEAE	4	4	4	>sp|Q9HWD8|RL2_PSEAE 50S ribosomal protein L2 OS=Pseudomonas aeruginosa (strain ATCC 15692 / PAO1 / 1C / PRS 101 / LMG 12228) GN=rplB PE=3 SV=1	1	4	4	4	23.8	23.8	23.8	29.579	273	273	0	39.623	61129000	7				96	90;256;257;495	True;True;True;True	92;270;271;521	160;161;162;163;450;451;917	194;195;196;197;557;558;1149	195;557;558;1149
sp|Q9HWE0|RL22_PSEAE	sp|Q9HWE0|RL22_PSEAE	2	2	2	>sp|Q9HWE0|RL22_PSEAE 50S ribosomal protein L22 OS=Pseudomonas aeruginosa (strain ATCC 15692 / PAO1 / 1C / PRS 101 / LMG 12228) GN=rplV PE=3 SV=1	1	2	2	2	30.9	30.9	30.9	11.911	110	110	0	50.577	19952000	4				97	671;691	True;True	707;727	1288;1289;1318;1319	1617;1618;1654;1655	1617;1654
sp|Q9HWE1|RS3_PSEAE	sp|Q9HWE1|RS3_PSEAE	2	2	2	>sp|Q9HWE1|RS3_PSEAE 30S ribosomal protein S3 OS=Pseudomonas aeruginosa (strain ATCC 15692 / PAO1 / 1C / PRS 101 / LMG 12228) GN=rpsC PE=3 SV=1	1	2	2	2	9.6	9.6	9.6	25.838	228	228	0	13.163	1912900	3				98	282;522	True;True	297;551	494;981;982	604;1229;1230	604;1230
sp|Q9HWE2|RL16_PSEAE	sp|Q9HWE2|RL16_PSEAE	2	2	2	>sp|Q9HWE2|RL16_PSEAE 50S ribosomal protein L16 OS=Pseudomonas aeruginosa (strain ATCC 15692 / PAO1 / 1C / PRS 101 / LMG 12228) GN=rplP PE=3 SV=1	1	2	2	2	16.8	16.8	16.8	15.401	137	137	0	16.706	4277800	2				99	701;720	True;True	737;756	1335;1367	1672;1713	1672;1713
sp|Q9HWE4|RS17_PSEAE	sp|Q9HWE4|RS17_PSEAE	2	2	2	>sp|Q9HWE4|RS17_PSEAE 30S ribosomal protein S17 OS=Pseudomonas aeruginosa (strain ATCC 15692 / PAO1 / 1C / PRS 101 / LMG 12228) GN=rpsQ PE=3 SV=1	1	2	2	2	20.5	20.5	20.5	10.086	88	88	0	14.641	3545100	4				100	100;638	True;True	104;671	183;184;1231	223;224;225;226;1549	226;1549
sp|Q9HWE5|RL14_PSEAE	sp|Q9HWE5|RL14_PSEAE	2	2	2	>sp|Q9HWE5|RL14_PSEAE 50S ribosomal protein L14 OS=Pseudomonas aeruginosa (strain ATCC 15692 / PAO1 / 1C / PRS 101 / LMG 12228) GN=rplN PE=3 SV=1	1	2	2	2	17.2	17.2	17.2	13.412	122	122	0	21.946	19640000	3				101	176;742	True;True	188;779	326;327;1405	395;396;1763	395;1763
sp|Q9HWE6|RL24_PSEAE	sp|Q9HWE6|RL24_PSEAE	1	1	1	>sp|Q9HWE6|RL24_PSEAE 50S ribosomal protein L24 OS=Pseudomonas aeruginosa (strain ATCC 15692 / PAO1 / 1C / PRS 101 / LMG 12228) GN=rplX PE=3 SV=1	1	1	1	1	9.6	9.6	9.6	11.47	104	104	0	6.9834	14299000	2				102	455	TRUE	475	792;793	980;981	981
sp|Q9HWE7|RL5_PSEAE	sp|Q9HWE7|RL5_PSEAE	1	1	1	>sp|Q9HWE7|RL5_PSEAE 50S ribosomal protein L5 OS=Pseudomonas aeruginosa (strain ATCC 15692 / PAO1 / 1C / PRS 101 / LMG 12228) GN=rplE PE=3 SV=1	1	1	1	1	6.1	6.1	6.1	20.392	179	179	0	6.8145	3853700	1				103	301	TRUE	317	525	643	643
sp|Q9HWE8|RS14_PSEAE	sp|Q9HWE8|RS14_PSEAE	2	2	2	>sp|Q9HWE8|RS14_PSEAE 30S ribosomal protein S14 OS=Pseudomonas aeruginosa (strain ATCC 15692 / PAO1 / 1C / PRS 101 / LMG 12228) GN=rpsN PE=3 SV=1	1	2	2	2	21.8	21.8	21.8	11.565	101	101	0	14.086	17032000	3				104	44;737	True;True	45;774	79;80;1398	96;97;1755	96;1755
sp|Q9HWE9|RS8_PSEAE	sp|Q9HWE9|RS8_PSEAE	3	3	3	>sp|Q9HWE9|RS8_PSEAE 30S ribosomal protein S8 OS=Pseudomonas aeruginosa (strain ATCC 15692 / PAO1 / 1C / PRS 101 / LMG 12228) GN=rpsH PE=3 SV=1	1	3	3	3	28.5	28.5	28.5	14.17	130	130	0	19.934	12940000	3				105	228;581;754	True;True;True	242;611;791	408;1091;1436	497;1368;1820	497;1368;1820	70	3
sp|Q9HWF2|RS5_PSEAE	sp|Q9HWF2|RS5_PSEAE	2	2	2	>sp|Q9HWF2|RS5_PSEAE 30S ribosomal protein S5 OS=Pseudomonas aeruginosa (strain ATCC 15692 / PAO1 / 1C / PRS 101 / LMG 12228) GN=rpsE PE=3 SV=1	1	2	2	2	19.9	19.9	19.9	17.625	166	166	0	25.47	8236000	2				106	96;732	True;True	100;769	178;1392	218;1744	218;1744	71	97
sp|Q9HWF3|RL30_PSEAE	sp|Q9HWF3|RL30_PSEAE	1	1	1	>sp|Q9HWF3|RL30_PSEAE 50S ribosomal protein L30 OS=Pseudomonas aeruginosa (strain ATCC 15692 / PAO1 / 1C / PRS 101 / LMG 12228) GN=rpmD PE=1 SV=3	1	1	1	1	24.1	24.1	24.1	6.4775	58	58	0	8.2507	718070	1				107	323	TRUE	340	568	699	699
sp|Q9HWF4|RL15_PSEAE	sp|Q9HWF4|RL15_PSEAE	3	3	3	>sp|Q9HWF4|RL15_PSEAE 50S ribosomal protein L15 OS=Pseudomonas aeruginosa (strain ATCC 15692 / PAO1 / 1C / PRS 101 / LMG 12228) GN=rplO PE=3 SV=1	1	3	3	3	22.2	22.2	22.2	15.174	144	144	0	28.301	23753000	6				108	111;661;702	True;True;True	115;697;738	198;199;200;1269;1270;1336	243;244;245;1597;1598;1673	244;1597;1673	72	111
sp|Q9HWF7|RS13_PSEAE	sp|Q9HWF7|RS13_PSEAE	1	1	1	>sp|Q9HWF7|RS13_PSEAE 30S ribosomal protein S13 OS=Pseudomonas aeruginosa (strain ATCC 15692 / PAO1 / 1C / PRS 101 / LMG 12228) GN=rpsM PE=3 SV=1	1	1	1	1	11	11	11	13.265	118	118	0	10.73	22520000	2				109	307	TRUE	323	536;537	661;662	661
sp|Q9HWF9|BFR_PSEAE	sp|Q9HWF9|BFR_PSEAE	1	1	1	>sp|Q9HWF9|BFR_PSEAE Bacterioferritin OS=Pseudomonas aeruginosa (strain ATCC 15692 / PAO1 / 1C / PRS 101 / LMG 12228) GN=bfr PE=1 SV=1	1	1	1	1	5.8	5.8	5.8	17.94	154	154	0	6.4384	2295800	1				110	318	TRUE	335	561	691	691
sp|Q9HX33|SYL_PSEAE	sp|Q9HX33|SYL_PSEAE	1	1	1	>sp|Q9HX33|SYL_PSEAE Leucine--tRNA ligase OS=Pseudomonas aeruginosa (strain ATCC 15692 / PAO1 / 1C / PRS 101 / LMG 12228) GN=leuS PE=3 SV=1	1	1	1	1	1.5	1.5	1.5	97.647	873	873	0	7.3214	1353500	1				111	659	TRUE	695	1265	1593	1593
sp|Q9HXM6|GUAA_PSEAE	sp|Q9HXM6|GUAA_PSEAE	3	3	3	>sp|Q9HXM6|GUAA_PSEAE GMP synthase [glutamine-hydrolyzing] OS=Pseudomonas aeruginosa (strain ATCC 15692 / PAO1 / 1C / PRS 101 / LMG 12228) GN=guaA PE=3 SV=1	1	3	3	3	5.9	5.9	5.9	57.959	525	525	0	20.681	11297000	4				112	72;366;610	True;True;True	73;383;642	129;130;639;1175	158;159;799;1475	158;799;1475
sp|Q9HXQ2|RL19_PSEAE	sp|Q9HXQ2|RL19_PSEAE	2	2	2	>sp|Q9HXQ2|RL19_PSEAE 50S ribosomal protein L19 OS=Pseudomonas aeruginosa (strain ATCC 15692 / PAO1 / 1C / PRS 101 / LMG 12228) GN=rplS PE=3 SV=1	1	2	2	2	22.4	22.4	22.4	13.032	116	116	0	15.093	3188200	1				113	437;611	True;True	457;643	759;1176	941;1476	941;1476
sp|Q9HXV4|KAD_PSEAE	sp|Q9HXV4|KAD_PSEAE	2	2	2	>sp|Q9HXV4|KAD_PSEAE Adenylate kinase OS=Pseudomonas aeruginosa (strain ATCC 15692 / PAO1 / 1C / PRS 101 / LMG 12228) GN=adk PE=3 SV=1	1	2	2	2	9.3	9.3	9.3	23.107	215	215	0	12.185	5853500	0				114	217;680	True;True	231;716	390;391;1302	473;474;1632	473;1632
sp|Q9HXZ4|PYRG_PSEAE	sp|Q9HXZ4|PYRG_PSEAE	1	1	1	>sp|Q9HXZ4|PYRG_PSEAE CTP synthase OS=Pseudomonas aeruginosa (strain ATCC 15692 / PAO1 / 1C / PRS 101 / LMG 12228) GN=pyrG PE=3 SV=1	1	1	1	1	3.1	3.1	3.1	59.617	542	542	0	6.8493	14553000	3				115	332	TRUE	349	581;582	716;717;718	717
sp|Q9HXZ5|ENO_PSEAE	sp|Q9HXZ5|ENO_PSEAE	4	4	4	>sp|Q9HXZ5|ENO_PSEAE Enolase OS=Pseudomonas aeruginosa (strain ATCC 15692 / PAO1 / 1C / PRS 101 / LMG 12228) GN=eno PE=3 SV=1	1	4	4	4	10.3	10.3	10.3	45.195	429	429	0	29.698	27562000	6				116	2;94;236;717	True;True;True;True	2;98;250;753	5;6;174;175;422;1363	5;6;210;211;522;1708	6;211;522;1708
sp|Q9HYR9|CLPP2_PSEAE	sp|Q9HYR9|CLPP2_PSEAE	1	1	1	>sp|Q9HYR9|CLPP2_PSEAE ATP-dependent Clp protease proteolytic subunit 2 OS=Pseudomonas aeruginosa (strain ATCC 15692 / PAO1 / 1C / PRS 101 / LMG 12228) GN=clpP2 PE=3 SV=1	1	1	1	1	6	6	6	22.142	201	201	0	10.249	1576800	1				117	288	TRUE	304	504	621	621
sp|Q9HZ71|RS1_PSEAE	sp|Q9HZ71|RS1_PSEAE	6	6	6	>sp|Q9HZ71|RS1_PSEAE 30S ribosomal protein S1 OS=Pseudomonas aeruginosa (strain ATCC 15692 / PAO1 / 1C / PRS 101 / LMG 12228) GN=rpsA PE=3 SV=1	1	6	6	6	14.3	14.3	14.3	61.869	559	559	0	48.304	39790000	8				118	28;145;225;351;583;598	True;True;True;True;True;True	28;154;239;368;613;630	49;50;263;402;617;1093;1094;1155;1156	62;63;325;488;769;1370;1371;1447;1448	62;325;488;769;1370;1448
sp|Q9HZ76|WBPE_PSEAE	sp|Q9HZ76|WBPE_PSEAE	1	1	1	>sp|Q9HZ76|WBPE_PSEAE UDP-2-acetamido-2-deoxy-3-oxo-D-glucuronate aminotransferase OS=Pseudomonas aeruginosa (strain ATCC 15692 / PAO1 / 1C / PRS 101 / LMG 12228) GN=wbpE PE=1 SV=1	1	1	1	1	3.3	3.3	3.3	38.924	359	359	0	6.772	743980	0				119	381	TRUE	398	658	824	824
sp|Q9HZE0|DHE2_PSEAE	sp|Q9HZE0|DHE2_PSEAE	9	9	9	>sp|Q9HZE0|DHE2_PSEAE NAD-specific glutamate dehydrogenase OS=Pseudomonas aeruginosa (strain ATCC 15692 / PAO1 / 1C / PRS 101 / LMG 12228) GN=gdhB PE=1 SV=1	1	9	9	9	6.5	6.5	6.5	182.64	1620	1620	0	80.082	70840000	15				120	12;45;55;157;319;427;453;693;722	True;True;True;True;True;True;True;True;True	12;46;56;167;336;447;473;729;759	22;81;82;100;101;287;288;562;743;744;789;1322;1323;1372	28;98;99;128;129;351;352;692;693;923;924;977;1658;1659;1724	28;98;128;351;693;923;977;1659;1724	73;74	195;1192
sp|Q9HZP5|ETFD_PSEAE	sp|Q9HZP5|ETFD_PSEAE	1	1	1	>sp|Q9HZP5|ETFD_PSEAE Electron transfer flavoprotein-ubiquinone oxidoreductase OS=Pseudomonas aeruginosa (strain ATCC 15692 / PAO1 / 1C / PRS 101 / LMG 12228) GN=PA2953 PE=1 SV=1	1	1	1	1	1.8	1.8	1.8	59.928	551	551	0	6.5984	408540	0				121	61	TRUE	62	109	138	138
sp|Q9HZP6|ETFB_PSEAE	sp|Q9HZP6|ETFB_PSEAE	2	2	2	>sp|Q9HZP6|ETFB_PSEAE Electron transfer flavoprotein subunit beta OS=Pseudomonas aeruginosa (strain ATCC 15692 / PAO1 / 1C / PRS 101 / LMG 12228) GN=etfB PE=3 SV=1	1	2	2	2	10.8	10.8	10.8	26.376	249	249	0	12.306	13941000	3				122	98;665	True;True	102;701	180;181;1279	220;221;1607	221;1607
sp|Q9HZZ2|EFP_PSEAE	sp|Q9HZZ2|EFP_PSEAE	3	3	3	>sp|Q9HZZ2|EFP_PSEAE Elongation factor P OS=Pseudomonas aeruginosa (strain ATCC 15692 / PAO1 / 1C / PRS 101 / LMG 12228) GN=efp PE=1 SV=1	1	3	3	3	19.7	19.7	19.7	20.985	188	188	0	20.047	33534000	2				123	11;504;681	True;True;True	11;530;717	21;942;1303;1304	26;27;1182;1633;1634	27;1182;1634
sp|Q9I0A2|RL20_PSEAE	sp|Q9I0A2|RL20_PSEAE	1	1	1	>sp|Q9I0A2|RL20_PSEAE 50S ribosomal protein L20 OS=Pseudomonas aeruginosa (strain ATCC 15692 / PAO1 / 1C / PRS 101 / LMG 12228) GN=rplT PE=3 SV=1	1	1	1	1	8.5	8.5	8.5	13.365	118	118	0.0049261	5.9858	3264700	1				124	687	TRUE	723	1312	1643	1643
sp|Q9I0K4|ACEA_PSEAE	sp|Q9I0K4|ACEA_PSEAE	3	3	3	>sp|Q9I0K4|ACEA_PSEAE Isocitrate lyase OS=Pseudomonas aeruginosa (strain ATCC 15692 / PAO1 / 1C / PRS 101 / LMG 12228) GN=PA2634 PE=1 SV=1	1	3	3	3	6.2	6.2	6.2	58.886	531	531	0	22.9	15175000	3				125	372;423;723	True;True;True	389;442;443;760	646;734;735;1373;1374	810;913;914;1725;1726	810;913;1726	75	415
sp|Q9I2A8|ATOB_PSEAE	sp|Q9I2A8|ATOB_PSEAE	4	4	4	>sp|Q9I2A8|ATOB_PSEAE Acetyl-CoA acetyltransferase OS=Pseudomonas aeruginosa (strain ATCC 15692 / PAO1 / 1C / PRS 101 / LMG 12228) GN=atoB PE=3 SV=1	1	4	4	4	12.2	12.2	12.2	40.405	393	393	0	25.917	47524000	9				126	39;58;194;699	True;True;True;True	40;59;208;735	69;70;105;356;357;358;1333	85;86;133;435;436;437;438;1669;1670	85;133;436;1669	76	82
sp|Q9I2U8|SYQ_PSEAE	sp|Q9I2U8|SYQ_PSEAE	1	1	1	>sp|Q9I2U8|SYQ_PSEAE Glutamine--tRNA ligase OS=Pseudomonas aeruginosa (strain ATCC 15692 / PAO1 / 1C / PRS 101 / LMG 12228) GN=glnS PE=1 SV=1	1	1	1	1	2	2	2	62.912	556	556	1	-2	156520	1	+			127	283	TRUE	298	495	605	605	77;78	180;185
sp|Q9I2V5|ACNB_PSEAE	sp|Q9I2V5|ACNB_PSEAE	13	13	13	>sp|Q9I2V5|ACNB_PSEAE Aconitate hydratase B OS=Pseudomonas aeruginosa (strain ATCC 15692 / PAO1 / 1C / PRS 101 / LMG 12228) GN=acnB PE=3 SV=1	1	13	13	13	19.1	19.1	19.1	93.627	869	869	0	111.17	149470000	22				128	19;36;118;219;233;265;330;434;467;477;628;718;761	True;True;True;True;True;True;True;True;True;True;True;True;True	19;37;122;233;247;279;347;454;488;502;661;754;798	35;36;65;66;210;211;394;416;417;418;466;579;755;756;809;829;1208;1209;1364;1365;1447;1448	45;46;81;82;257;258;477;515;516;517;575;714;937;938;997;1023;1520;1521;1709;1710;1836;1837;1838	46;81;258;477;516;575;714;938;997;1023;1520;1709;1836	79	423
sp|Q9I3D1|DLDH2_PSEAE	sp|Q9I3D1|DLDH2_PSEAE	7	7	7	>sp|Q9I3D1|DLDH2_PSEAE Dihydrolipoyl dehydrogenase OS=Pseudomonas aeruginosa (strain ATCC 15692 / PAO1 / 1C / PRS 101 / LMG 12228) GN=lpdG PE=3 SV=1	1	7	7	7	17.6	17.6	17.6	50.164	478	478	0	65.722	80204000	9				129	65;84;189;261;395;506;633	True;True;True;True;True;True;True	66;85;86;202;275;412;532;666	116;149;150;348;457;680;944;945;1220;1221	145;182;183;427;565;847;1184;1185;1537;1538	145;182;427;565;847;1184;1538	80;81	91;336
sp|Q9I3F5|ACNA_PSEAE	sp|Q9I3F5|ACNA_PSEAE	5	5	5	>sp|Q9I3F5|ACNA_PSEAE Aconitate hydratase A OS=Pseudomonas aeruginosa (strain ATCC 15692 / PAO1 / 1C / PRS 101 / LMG 12228) GN=acnA PE=3 SV=1	1	5	5	5	8.1	8.1	8.1	99.147	910	910	0	40.09	33973000	7				130	37;325;418;696;764	True;True;True;True;True	38;342;436;732;801	67;571;572;723;1327;1328;1453;1454	83;702;703;898;1663;1664;1843;1844	83;702;898;1664;1843
sp|Q9I4W3|DAPA_PSEAE	sp|Q9I4W3|DAPA_PSEAE	1	1	1	>sp|Q9I4W3|DAPA_PSEAE 4-hydroxy-tetrahydrodipicolinate synthase OS=Pseudomonas aeruginosa (strain ATCC 15692 / PAO1 / 1C / PRS 101 / LMG 12228) GN=dapA PE=1 SV=1	1	1	1	1	3.1	3.1	3.1	31.449	292	292	0	7.1974	4786500	1				131	435	TRUE	455	757	939	939
sp|Q9I4Z4|PAL_PSEAE	sp|Q9I4Z4|PAL_PSEAE	1	1	1	>sp|Q9I4Z4|PAL_PSEAE Peptidoglycan-associated lipoprotein OS=Pseudomonas aeruginosa (strain ATCC 15692 / PAO1 / 1C / PRS 101 / LMG 12228) GN=pal PE=3 SV=1	1	1	1	1	10.1	10.1	10.1	17.925	168	168	0	10.273	6564400	2				132	164	TRUE	176	304;305	372;373	372
sp|Q9I558|ACSA1_PSEAE	sp|Q9I558|ACSA1_PSEAE	2	2	2	>sp|Q9I558|ACSA1_PSEAE Acetyl-coenzyme A synthetase 1 OS=Pseudomonas aeruginosa (strain ATCC 15692 / PAO1 / 1C / PRS 101 / LMG 12228) GN=acsA1 PE=3 SV=1	1	2	2	2	4.5	4.5	4.5	71.762	651	651	0	12.405	3133900	2				133	464;642	True;True	485;675	806;1235	994;1553	994;1553	82;83;84	527;536;550
sp|Q9I576|HPPD_PSEAE	sp|Q9I576|HPPD_PSEAE	3	3	3	>sp|Q9I576|HPPD_PSEAE 4-hydroxyphenylpyruvate dioxygenase OS=Pseudomonas aeruginosa (strain ATCC 15692 / PAO1 / 1C / PRS 101 / LMG 12228) GN=hpd PE=3 SV=1	1	3	3	3	12.6	12.6	12.6	39.912	357	357	0	35.735	28641000	4				134	328;487;644	True;True;True	345;513;677	576;904;905;1238;1239	709;1136;1137;1556;1557	709;1136;1556
sp|Q9I589|CBPD_PSEAE	sp|Q9I589|CBPD_PSEAE	2	2	2	>sp|Q9I589|CBPD_PSEAE Chitin-binding protein CbpD OS=Pseudomonas aeruginosa (strain ATCC 15692 / PAO1 / 1C / PRS 101 / LMG 12228) GN=cbpD PE=1 SV=1	1	2	2	2	5.7	5.7	5.7	41.916	389	389	0	15.175	10950000	3				135	80;753	True;True	81;790	142;143;1435	171;172;1819	172;1819
sp|Q9I5V8|RS21_PSEAE	sp|Q9I5V8|RS21_PSEAE	1	1	1	>sp|Q9I5V8|RS21_PSEAE 30S ribosomal protein S21 OS=Pseudomonas aeruginosa (strain ATCC 15692 / PAO1 / 1C / PRS 101 / LMG 12228) GN=rpsU PE=1 SV=3	1	1	1	1	16.9	16.9	16.9	8.4848	71	71	0	6.2429	2514500	1				136	684	TRUE	720	1308	1639	1639
sp|Q9I5Y1|ALF_PSEAE	sp|Q9I5Y1|ALF_PSEAE	3	3	3	>sp|Q9I5Y1|ALF_PSEAE Fructose-bisphosphate aldolase OS=Pseudomonas aeruginosa (strain ATCC 15692 / PAO1 / 1C / PRS 101 / LMG 12228) GN=fba PE=3 SV=1	1	3	3	3	11	11	11	38.573	354	354	0	20.785	6558600	5				137	165;182;311	True;True;True	177;195;328	306;307;337;549	374;375;376;410;677	376;410;677	85	340
sp|Q9I5Z0|METK_PSEAE	sp|Q9I5Z0|METK_PSEAE	2	2	2	>sp|Q9I5Z0|METK_PSEAE S-adenosylmethionine synthase OS=Pseudomonas aeruginosa (strain ATCC 15692 / PAO1 / 1C / PRS 101 / LMG 12228) GN=metK PE=3 SV=1	1	2	2	2	5.1	5.1	5.1	42.709	396	396	0	12.867	4043500	2				138	119;306	True;True	123;322	212;535	259;660	259;660	86;87	205;256
sp|Q9I685|SAHH_PSEAE	sp|Q9I685|SAHH_PSEAE	7	7	7	>sp|Q9I685|SAHH_PSEAE Adenosylhomocysteinase OS=Pseudomonas aeruginosa (strain ATCC 15692 / PAO1 / 1C / PRS 101 / LMG 12228) GN=ahcY PE=3 SV=1	1	7	7	7	19	19	19	51.399	469	469	0	59.742	68431000	10				139	215;298;454;491;640;706;740	True;True;True;True;True;True;True	229;314;474;517;673;742;777	388;520;521;522;790;791;911;1233;1345;1346;1402	471;638;639;640;978;979;1143;1551;1683;1684;1685;1760	471;640;978;1143;1551;1685;1760
sp|Q9I6G2|Y329_PSEAE	sp|Q9I6G2|Y329_PSEAE	1	1	1	>sp|Q9I6G2|Y329_PSEAE UPF0339 protein PA0329 OS=Pseudomonas aeruginosa (strain ATCC 15692 / PAO1 / 1C / PRS 101 / LMG 12228) GN=PA0329 PE=3 SV=1	1	1	1	1	10	10	10	11.773	110	110	0	6.4932	4887100	0				140	132	TRUE	137	235;236	286;287	286
sp|Q9I6M4|DAVT_PSEAE	sp|Q9I6M4|DAVT_PSEAE	7	7	7	>sp|Q9I6M4|DAVT_PSEAE 5-aminovalerate aminotransferase DavT OS=Pseudomonas aeruginosa (strain ATCC 15692 / PAO1 / 1C / PRS 101 / LMG 12228) GN=davT PE=1 SV=1	1	7	7	7	21.6	21.6	21.6	45.22	426	426	0	57.432	48756000	6				141	21;41;188;259;597;620;675	True;True;True;True;True;True;True	21;42;201;273;629;652;711	39;73;347;454;1153;1154;1191;1294	50;51;89;426;562;1445;1446;1498;1624	51;89;426;562;1445;1498;1624
sp|Q9I6M5|DAVD_PSEAE	sp|Q9I6M5|DAVD_PSEAE	2	2	2	>sp|Q9I6M5|DAVD_PSEAE Glutarate-semialdehyde dehydrogenase DavD OS=Pseudomonas aeruginosa (strain ATCC 15692 / PAO1 / 1C / PRS 101 / LMG 12228) GN=davD PE=1 SV=1	1	2	2	2	5.6	5.6	5.6	51.622	483	483	0	19.578	15621000	3				142	115;704	True;True	119;740	206;1341;1342	251;1679;1680	251;1680
sp|Q9I747|HCP1_PSEAE	sp|Q9I747|HCP1_PSEAE	2	2	2	>sp|Q9I747|HCP1_PSEAE Protein hcp1 OS=Pseudomonas aeruginosa (strain ATCC 15692 / PAO1 / 1C / PRS 101 / LMG 12228) GN=hcp1 PE=1 SV=1	1	2	2	2	16.7	16.7	16.7	17.414	162	162	0	33.656	38236000	4				143	168;705	True;True	180;741	312;313;1343;1344	381;382;1681;1682	381;1682
sp|Q9I7C2|GYRB_PSEAE	sp|Q9I7C2|GYRB_PSEAE	1	1	1	>sp|Q9I7C2|GYRB_PSEAE DNA gyrase subunit B OS=Pseudomonas aeruginosa (strain ATCC 15692 / PAO1 / 1C / PRS 101 / LMG 12228) GN=gyrB PE=3 SV=1	1	1	1	1	1.7	1.7	1.7	90.188	806	806	0	13.917	657080	2				144	752	TRUE	789	1434	1817;1818	1817
sp|Q9I7C4|DPO3B_PSEAE	sp|Q9I7C4|DPO3B_PSEAE	1	1	1	>sp|Q9I7C4|DPO3B_PSEAE DNA polymerase III subunit beta OS=Pseudomonas aeruginosa (strain ATCC 15692 / PAO1 / 1C / PRS 101 / LMG 12228) GN=dnaN PE=3 SV=1	1	1	1	1	5.2	5.2	5.2	40.694	367	367	0	8.2941	5427700	1				145	420	TRUE	438	726;727	901;902	902
sp|Q9LCT3|SECA_PSEAE	sp|Q9LCT3|SECA_PSEAE	1	1	1	>sp|Q9LCT3|SECA_PSEAE Protein translocase subunit SecA OS=Pseudomonas aeruginosa (strain ATCC 15692 / PAO1 / 1C / PRS 101 / LMG 12228) GN=secA PE=3 SV=1	1	1	1	1	1.4	1.4	1.4	103.85	916	916	1	-2	464700	1	+			146	57	TRUE	58	104	132	132	88	612
sp|Q9S646|PPK_PSEAE	sp|Q9S646|PPK_PSEAE	1	1	1	>sp|Q9S646|PPK_PSEAE Polyphosphate kinase OS=Pseudomonas aeruginosa (strain ATCC 15692 / PAO1 / 1C / PRS 101 / LMG 12228) GN=ppk PE=3 SV=1	1	1	1	1	2.3	2.3	2.3	78.292	690	690	0	8.5872	417250	0				147	560	TRUE	590	1054	1324	1324
sp|Q9X2T1|THIO_PSEAE	sp|Q9X2T1|THIO_PSEAE	3	3	3	>sp|Q9X2T1|THIO_PSEAE Thioredoxin OS=Pseudomonas aeruginosa (strain ATCC 15692 / PAO1 / 1C / PRS 101 / LMG 12228) GN=trxA PE=3 SV=1	1	3	3	3	38	38	38	11.87	108	108	0	19.486	24741000	5				148	429;465;554	True;True;True	449;486;584	746;747;807;1042	927;928;929;995;1309	927;995;1309	89	38
tr|G3XCT6|G3XCT6_PSEAE	tr|G3XCT6|G3XCT6_PSEAE	1	1	1	>tr|G3XCT6|G3XCT6_PSEAE Probable two-component sensor OS=Pseudomonas aeruginosa (strain ATCC 15692 / PAO1 / 1C / PRS 101 / LMG 12228) GN=PA1458 PE=4 SV=1	1	1	1	1	2.3	2.3	2.3	79.737	753	753	0	7.3414	4352900	2				149	524	TRUE	553	985;986	1234;1235	1234
tr|G3XD11|G3XD11_PSEAE	tr|G3XD11|G3XD11_PSEAE	3	3	3	>tr|G3XD11|G3XD11_PSEAE PhoP/Q and low Mg2+ inducible outer membrane protein H1 OS=Pseudomonas aeruginosa (strain ATCC 15692 / PAO1 / 1C / PRS 101 / LMG 12228) GN=oprH PE=4 SV=1	1	3	3	3	15.5	15.5	15.5	21.574	200	200	0	22.43	45434000	5				150	392;505;678	True;True;True	409;531;714	676;677;943;1299;1300	843;844;1183;1629;1630	843;1183;1630
tr|Q9HTD1|Q9HTD1_PSEAE	tr|Q9HTD1|Q9HTD1_PSEAE	6	6	6	>tr|Q9HTD1|Q9HTD1_PSEAE Probable transcarboxylase subunit OS=Pseudomonas aeruginosa (strain ATCC 15692 / PAO1 / 1C / PRS 101 / LMG 12228) GN=PA5435 PE=4 SV=1	1	6	6	6	9.2	9.2	9.2	66.095	607	607	0	40.763	55695000	11				151	8;70;249;289;463;653	True;True;True;True;True;True	8;71;263;305;483;484;689	15;16;125;126;438;505;506;803;804;805;1257	20;21;154;155;539;622;623;991;992;993;1580	20;154;539;623;993;1580	90;91	125;323
tr|Q9HTD9|Q9HTD9_PSEAE	tr|Q9HTD9|Q9HTD9_PSEAE	5	5	5	>tr|Q9HTD9|Q9HTD9_PSEAE Alcohol dehydrogenase OS=Pseudomonas aeruginosa (strain ATCC 15692 / PAO1 / 1C / PRS 101 / LMG 12228) GN=adhA PE=1 SV=1	1	5	5	5	17.8	17.8	17.8	35.911	342	342	0	54.167	41757000	9				152	9;66;376;531;710	True;True;True;True;True	9;67;393;560;746	17;18;117;118;119;650;651;997;1351;1352	22;23;146;147;148;814;815;1247;1691;1692	22;146;814;1247;1691	92	193
tr|Q9HTP2|Q9HTP2_PSEAE	tr|Q9HTP2|Q9HTP2_PSEAE	3	3	3	>tr|Q9HTP2|Q9HTP2_PSEAE Probable aldehyde dehydrogenase OS=Pseudomonas aeruginosa (strain ATCC 15692 / PAO1 / 1C / PRS 101 / LMG 12228) GN=PA5312 PE=3 SV=1	1	3	3	3	9.7	9.7	9.7	53.143	497	497	0	19.587	33736000	6				153	276;346;403	True;True;True	291;363;421	485;608;609;694;695	595;755;756;757;863;864	595;755;863
tr|Q9HU11|Q9HU11_PSEAE	tr|Q9HU11|Q9HU11_PSEAE	7	7	7	>tr|Q9HU11|Q9HU11_PSEAE Uncharacterized protein OS=Pseudomonas aeruginosa (strain ATCC 15692 / PAO1 / 1C / PRS 101 / LMG 12228) GN=PA5178 PE=4 SV=1	1	7	7	7	60	60	60	15.46	145	145	0	72.975	46166000	11				154	23;317;343;457;673;676;677	True;True;True;True;True;True;True	23;334;360;477;709;712;713	41;559;560;604;795;1292;1295;1296;1297;1298	53;689;690;751;983;1621;1622;1625;1626;1627;1628	53;690;751;983;1621;1625;1627	93	119
tr|Q9HUC3|Q9HUC3_PSEAE	tr|Q9HUC3|Q9HUC3_PSEAE	2	2	2	>tr|Q9HUC3|Q9HUC3_PSEAE Polyhydroxyalkanoate synthesis protein PhaF OS=Pseudomonas aeruginosa (strain ATCC 15692 / PAO1 / 1C / PRS 101 / LMG 12228) GN=phaF PE=4 SV=1	1	2	2	2	5.8	5.8	5.8	30.577	309	309	0	10.884	9451500	2				155	391;738	True;True	408;775	675;1399	842;1756	842;1756
tr|Q9HUD3|Q9HUD3_PSEAE	tr|Q9HUD3|Q9HUD3_PSEAE	1	1	1	>tr|Q9HUD3|Q9HUD3_PSEAE Malic enzyme OS=Pseudomonas aeruginosa (strain ATCC 15692 / PAO1 / 1C / PRS 101 / LMG 12228) GN=PA5046 PE=3 SV=1	1	1	1	1	2.6	2.6	2.6	45.428	422	422	0	7.7865	10160000	2				156	410	TRUE	428	706;707	876;877	876
tr|Q9HUG0|Q9HUG0_PSEAE	tr|Q9HUG0|Q9HUG0_PSEAE	1	1	1	>tr|Q9HUG0|Q9HUG0_PSEAE Probable carbamoyl transferase OS=Pseudomonas aeruginosa (strain ATCC 15692 / PAO1 / 1C / PRS 101 / LMG 12228) GN=PA5005 PE=4 SV=1	1	1	1	1	2.4	2.4	2.4	66.079	585	585	0	9.2592	2514400	1				157	313	TRUE	330	553	681	681
tr|Q9HV54|Q9HV54_PSEAE	tr|Q9HV54|Q9HV54_PSEAE	1	1	1	>tr|Q9HV54|Q9HV54_PSEAE Transcription termination/antitermination protein NusA OS=Pseudomonas aeruginosa (strain ATCC 15692 / PAO1 / 1C / PRS 101 / LMG 12228) GN=nusA PE=3 SV=1	1	1	1	1	2.4	2.4	2.4	54.658	493	493	0.0048544	5.9603	1046700	1				158	715	TRUE	751	1360	1703	1703
tr|Q9HVJ1|Q9HVJ1_PSEAE	tr|Q9HVJ1|Q9HVJ1_PSEAE	4	4	4	>tr|Q9HVJ1|Q9HVJ1_PSEAE Probable ATP-binding component of ABC transporter OS=Pseudomonas aeruginosa (strain ATCC 15692 / PAO1 / 1C / PRS 101 / LMG 12228) GN=PA4595 PE=3 SV=1	1	4	4	4	8.8	8.8	8.8	61.32	554	554	0	31.066	14834000	4				159	177;296;383;695	True;True;True;True	189;312;400;731	328;517;661;1326	397;635;827;1662	397;635;827;1662
tr|Q9HVV5|Q9HVV5_PSEAE	tr|Q9HVV5|Q9HVV5_PSEAE	2	2	2	>tr|Q9HVV5|Q9HVV5_PSEAE Uncharacterized protein OS=Pseudomonas aeruginosa (strain ATCC 15692 / PAO1 / 1C / PRS 101 / LMG 12228) GN=PA4463 PE=4 SV=1	1	2	2	2	28.4	28.4	28.4	11.739	102	102	0	14.013	9251200	2				160	342;472	True;True	359;495	602;603;819	749;750;1008	750;1008	94;95	1;41
tr|Q9HVY4|Q9HVY4_PSEAE	tr|Q9HVY4|Q9HVY4_PSEAE	1	1	1	>tr|Q9HVY4|Q9HVY4_PSEAE Ubiquinol-cytochrome c reductase iron-sulfur subunit OS=Pseudomonas aeruginosa (strain ATCC 15692 / PAO1 / 1C / PRS 101 / LMG 12228) GN=PA4431 PE=4 SV=1	1	1	1	1	6.1	6.1	6.1	20.828	197	197	0.004717	5.8735	10005000	1				161	1	TRUE	1	4	4	4
tr|Q9HVY6|Q9HVY6_PSEAE	tr|Q9HVY6|Q9HVY6_PSEAE	1	1	1	>tr|Q9HVY6|Q9HVY6_PSEAE Probable cytochrome c1 OS=Pseudomonas aeruginosa (strain ATCC 15692 / PAO1 / 1C / PRS 101 / LMG 12228) GN=PA4429 PE=4 SV=1	1	1	1	1	3.8	3.8	3.8	28.993	260	260	0	7.6772	466140	1				162	254	TRUE	268	447	554	554
tr|Q9HW32|Q9HW32_PSEAE	tr|Q9HW32|Q9HW32_PSEAE	1	1	1	>tr|Q9HW32|Q9HW32_PSEAE Insulin-cleaving metalloproteinase outer membrane protein OS=Pseudomonas aeruginosa (strain ATCC 15692 / PAO1 / 1C / PRS 101 / LMG 12228) GN=icmP PE=4 SV=1	1	1	1	1	2.2	2.2	2.2	47.23	446	446	0.0047847	5.9481	2241800	1				163	247	TRUE	261	434	535	535
tr|Q9HW49|Q9HW49_PSEAE	tr|Q9HW49|Q9HW49_PSEAE	3	3	3	>tr|Q9HW49|Q9HW49_PSEAE Uncharacterized protein OS=Pseudomonas aeruginosa (strain ATCC 15692 / PAO1 / 1C / PRS 101 / LMG 12228) GN=PA4352 PE=4 SV=1	1	3	3	3	10.8	10.8	10.8	30.972	286	286	0	21.268	18580000	4				164	144;320;662	True;True;True	153;337;698	262;563;1271;1272	324;694;1599;1600	324;694;1599
tr|Q9HW72|Q9HW72_PSEAE	tr|Q9HW72|Q9HW72_PSEAE	2	2	2	>tr|Q9HW72|Q9HW72_PSEAE Pyruvate kinase OS=Pseudomonas aeruginosa (strain ATCC 15692 / PAO1 / 1C / PRS 101 / LMG 12228) GN=pykA PE=3 SV=1	1	2	2	2	4.3	4.3	4.3	52.252	483	483	0	11.885	11673000	3				165	199;694	True;True	213;730	366;367;1324;1325	447;448;1660;1661	447;1661
tr|Q9HW86|Q9HW86_PSEAE	tr|Q9HW86|Q9HW86_PSEAE	1	1	1	>tr|Q9HW86|Q9HW86_PSEAE MvaT OS=Pseudomonas aeruginosa (strain ATCC 15692 / PAO1 / 1C / PRS 101 / LMG 12228) GN=mvaT PE=1 SV=1	1	1	1	1	8.9	8.9	8.9	14.18	124	124	0	6.6339	2156000	0				166	138	TRUE	145	249	302	302
tr|Q9HWG9|Q9HWG9_PSEAE	tr|Q9HWG9|Q9HWG9_PSEAE	2	2	2	>tr|Q9HWG9|Q9HWG9_PSEAE Flavin-containing monooxygenase OS=Pseudomonas aeruginosa (strain ATCC 15692 / PAO1 / 1C / PRS 101 / LMG 12228) GN=phzS PE=1 SV=1	1	2	2	2	9.2	9.2	9.2	43.644	402	402	0	17.221	15309000	5				167	117;623	True;True	121;655	208;209;1197	253;254;255;256;1505	254;1505	96	205
tr|Q9HWH2|Q9HWH2_PSEAE	tr|Q9HWH2|Q9HWH2_PSEAE	1	1	1	>tr|Q9HWH2|Q9HWH2_PSEAE Probable phenazine-specific methyltransferase OS=Pseudomonas aeruginosa (strain ATCC 15692 / PAO1 / 1C / PRS 101 / LMG 12228) GN=phzM PE=1 SV=1	1	1	1	1	4.2	4.2	4.2	36.357	334	334	0	8.2766	678930	0				168	559	TRUE	589	1053	1323	1323
tr|Q9HWQ0|Q9HWQ0_PSEAE	tr|Q9HWQ0|Q9HWQ0_PSEAE	2	2	2	>tr|Q9HWQ0|Q9HWQ0_PSEAE Probable iron-sulfur protein OS=Pseudomonas aeruginosa (strain ATCC 15692 / PAO1 / 1C / PRS 101 / LMG 12228) GN=PA4131 PE=4 SV=1	1	2	2	2	4.9	4.9	4.9	63.991	573	573	0	15.603	3580600	2				169	327;436	True;True	344;456	575;758	708;940	708;940
tr|Q9HWV0|Q9HWV0_PSEAE	tr|Q9HWV0|Q9HWV0_PSEAE	2	2	2	>tr|Q9HWV0|Q9HWV0_PSEAE Probable nonribosomal peptide synthetase OS=Pseudomonas aeruginosa (strain ATCC 15692 / PAO1 / 1C / PRS 101 / LMG 12228) GN=PA4078 PE=4 SV=1	1	2	2	2	3	3	3	110.35	991	991	0	12.818	8846000	2				170	572;663	True;True	602;699	1075;1273;1274	1346;1601;1602	1346;1602
tr|Q9HWW1|Q9HWW1_PSEAE	tr|Q9HWW1|Q9HWW1_PSEAE	4	4	4	>tr|Q9HWW1|Q9HWW1_PSEAE Outer membrane protein OprG OS=Pseudomonas aeruginosa (strain ATCC 15692 / PAO1 / 1C / PRS 101 / LMG 12228) GN=oprG PE=1 SV=1	1	4	4	4	19.4	19.4	19.4	25.193	232	232	0	31.006	40078000	5				171	31;85;224;241	True;True;True;True	31;87;238;255	56;151;401;428	70;184;486;487;529	70;184;486;529
tr|Q9HX05|Q9HX05_PSEAE;tr|Q9I2C4|Q9I2C4_PSEAE	tr|Q9HX05|Q9HX05_PSEAE	3;1	3;1	3;1	>tr|Q9HX05|Q9HX05_PSEAE Probable aldehyde dehydrogenase OS=Pseudomonas aeruginosa (strain ATCC 15692 / PAO1 / 1C / PRS 101 / LMG 12228) GN=PA4022 PE=3 SV=1	2	3	3	3	8.5	8.5	8.5	54.979	506	506;506	0	21.4	17101000	5				172	51;273;743	True;True;True	52;287;780	93;479;480;1406	112;589;590;1764;1765	112;590;1765
tr|Q9HX76|Q9HX76_PSEAE	tr|Q9HX76|Q9HX76_PSEAE	2	2	2	>tr|Q9HX76|Q9HX76_PSEAE Probable DNA binding protein OS=Pseudomonas aeruginosa (strain ATCC 15692 / PAO1 / 1C / PRS 101 / LMG 12228) GN=PA3940 PE=3 SV=1	1	2	2	2	29	29	29	9.8923	93	93	0	13.394	9498900	2				173	110;552	True;True	114;582	197;1039;1040	242;1306;1307	242;1307
tr|Q9HXI3|Q9HXI3_PSEAE	tr|Q9HXI3|Q9HXI3_PSEAE	1	1	1	>tr|Q9HXI3|Q9HXI3_PSEAE Uncharacterized protein OS=Pseudomonas aeruginosa (strain ATCC 15692 / PAO1 / 1C / PRS 101 / LMG 12228) GN=PA3819 PE=4 SV=1	1	1	1	1	7.7	7.7	7.7	18.972	182	182	0	6.3973	20171000	2				174	763	TRUE	800	1451;1452	1841;1842	1842	97;98	147;157
tr|Q9HXR8|Q9HXR8_PSEAE	tr|Q9HXR8|Q9HXR8_PSEAE	1	1	1	>tr|Q9HXR8|Q9HXR8_PSEAE Probable FMN oxidoreductase OS=Pseudomonas aeruginosa (strain ATCC 15692 / PAO1 / 1C / PRS 101 / LMG 12228) GN=PA3723 PE=4 SV=1	1	1	1	1	2.7	2.7	2.7	40.318	368	368	0	6.1398	1961500	3				175	578	TRUE	608	1086;1087	1359;1360;1361	1360
tr|Q9HXU9|Q9HXU9_PSEAE	tr|Q9HXU9|Q9HXU9_PSEAE	2	2	2	>tr|Q9HXU9|Q9HXU9_PSEAE Uncharacterized protein OS=Pseudomonas aeruginosa (strain ATCC 15692 / PAO1 / 1C / PRS 101 / LMG 12228) GN=PA3691 PE=4 SV=1	1	2	2	2	14.9	14.9	14.9	14.468	134	134	0	12.047	0	3				176	112;370	True;True	116;387	201;202;644	246;247;807	247;807	99	122
tr|Q9HY01|Q9HY01_PSEAE	tr|Q9HY01|Q9HY01_PSEAE	1	1	1	>tr|Q9HY01|Q9HY01_PSEAE S-(hydroxymethyl)glutathione dehydrogenase OS=Pseudomonas aeruginosa (strain ATCC 15692 / PAO1 / 1C / PRS 101 / LMG 12228) GN=adhC PE=3 SV=1	1	1	1	1	3	3	3	39.208	370	370	0	6.6167	0	1				177	158	TRUE	168	289	353	353
tr|Q9HY12|Q9HY12_PSEAE	tr|Q9HY12|Q9HY12_PSEAE	1	1	1	>tr|Q9HY12|Q9HY12_PSEAE Uncharacterized protein OS=Pseudomonas aeruginosa (strain ATCC 15692 / PAO1 / 1C / PRS 101 / LMG 12228) GN=PA3614 PE=4 SV=1	1	1	1	1	1.9	1.9	1.9	51.921	467	467	0.0093023	5.7856	2792400	2				178	384	TRUE	401	662;663	828;829	829
tr|Q9HY13|Q9HY13_PSEAE	tr|Q9HY13|Q9HY13_PSEAE	4	4	4	>tr|Q9HY13|Q9HY13_PSEAE Uncharacterized protein OS=Pseudomonas aeruginosa (strain ATCC 15692 / PAO1 / 1C / PRS 101 / LMG 12228) GN=PA3613 PE=4 SV=1	1	4	4	4	5.9	5.9	5.9	88.378	801	801	0	25.625	14493000	3				179	378;456;607;674	True;True;True;True	395;476;639;710	655;794;1170;1171;1293	821;982;1470;1471;1623	821;982;1470;1623
tr|Q9HY77|Q9HY77_PSEAE	tr|Q9HY77|Q9HY77_PSEAE	3	3	3	>tr|Q9HY77|Q9HY77_PSEAE Glutaredoxin OS=Pseudomonas aeruginosa (strain ATCC 15692 / PAO1 / 1C / PRS 101 / LMG 12228) GN=PA3533 PE=3 SV=1	1	3	3	3	26.9	26.9	26.9	11.843	108	108	0	32.341	18438000	5				180	175;213;461	True;True;True	187;227;481	324;325;386;800;801	393;394;469;988;989	393;469;988
tr|Q9HY79|Q9HY79_PSEAE	tr|Q9HY79|Q9HY79_PSEAE	1	1	1	>tr|Q9HY79|Q9HY79_PSEAE Ferroxidase OS=Pseudomonas aeruginosa (strain ATCC 15692 / PAO1 / 1C / PRS 101 / LMG 12228) GN=bfrB PE=1 SV=1	1	1	1	1	8.9	8.9	8.9	18.553	158	158	0	7.8119	2009800	3				181	396	TRUE	413	681;682;683	848;849;850	848	100	52
tr|Q9HY81|Q9HY81_PSEAE	tr|Q9HY81|Q9HY81_PSEAE	2	2	2	>tr|Q9HY81|Q9HY81_PSEAE Probable peroxidase OS=Pseudomonas aeruginosa (strain ATCC 15692 / PAO1 / 1C / PRS 101 / LMG 12228) GN=PA3529 PE=4 SV=1	1	2	2	2	12	12	12	21.822	200	200	0	20.102	55420000	4				182	102;588	True;True	106;619	186;187;1106;1107	228;229;1385;1386	228;1385
tr|Q9HYT5|Q9HYT5_PSEAE	tr|Q9HYT5|Q9HYT5_PSEAE	8	8	8	>tr|Q9HYT5|Q9HYT5_PSEAE Uncharacterized protein OS=Pseudomonas aeruginosa (strain ATCC 15692 / PAO1 / 1C / PRS 101 / LMG 12228) GN=PA3309 PE=4 SV=1	1	8	8	8	62.9	62.9	62.9	16.496	151	151	0	91.856	474480000	26				183	154;269;286;321;421;648;657;682	True;True;True;True;True;True;True;True	164;283;301;302;338;439;440;682;693;718	281;282;283;473;474;499;500;501;502;564;565;566;728;729;730;731;1246;1263;1305;1306	345;346;347;583;584;614;615;616;617;618;619;695;696;697;903;904;905;906;907;908;909;910;1564;1565;1591;1635;1636	346;584;619;695;904;1564;1591;1636	101;102	117;129
tr|Q9HZ48|Q9HZ48_PSEAE	tr|Q9HZ48|Q9HZ48_PSEAE	1	1	1	>tr|Q9HZ48|Q9HZ48_PSEAE Probable binding protein component of ABC sugar transporter OS=Pseudomonas aeruginosa (strain ATCC 15692 / PAO1 / 1C / PRS 101 / LMG 12228) GN=PA3190 PE=4 SV=1	1	1	1	1	4.3	4.3	4.3	45.131	420	420	0	10.171	581710	2				184	30	TRUE	30	55	68;69	69
tr|Q9HZK4|Q9HZK4_PSEAE	tr|Q9HZK4|Q9HZK4_PSEAE	3	3	3	>tr|Q9HZK4|Q9HZK4_PSEAE Glyceraldehyde-3-phosphate dehydrogenase OS=Pseudomonas aeruginosa (strain ATCC 15692 / PAO1 / 1C / PRS 101 / LMG 12228) GN=PA3001 PE=3 SV=1	1	3	3	3	8.2	8.2	8.2	50.111	461	461	0	17.316	20950000	3				185	18;394;553	True;True;True	18;411;583	33;34;679;1041	43;44;846;1308	43;846;1308	103	325
tr|Q9I028|Q9I028_PSEAE	tr|Q9I028|Q9I028_PSEAE	1	1	1	>tr|Q9I028|Q9I028_PSEAE Probable acyl-CoA dehydrogenase OS=Pseudomonas aeruginosa (strain ATCC 15692 / PAO1 / 1C / PRS 101 / LMG 12228) GN=PA2815 PE=4 SV=1	1	1	1	1	2.1	2.1	2.1	88.762	815	815	0.004902	5.9845	2503700	3				186	129	TRUE	134	229;230	278;279;280	278
tr|Q9I0H1|Q9I0H1_PSEAE	tr|Q9I0H1|Q9I0H1_PSEAE	1	1	1	>tr|Q9I0H1|Q9I0H1_PSEAE Uncharacterized protein OS=Pseudomonas aeruginosa (strain ATCC 15692 / PAO1 / 1C / PRS 101 / LMG 12228) GN=PA2667 PE=4 SV=1	1	1	1	1	9.4	9.4	9.4	13.379	117	117	0.0048309	5.9581	324390	1				187	76	TRUE	77	137	166	166
tr|Q9I0L4|Q9I0L4_PSEAE	tr|Q9I0L4|Q9I0L4_PSEAE	6	6	6	>tr|Q9I0L4|Q9I0L4_PSEAE Isocitrate dehydrogenase OS=Pseudomonas aeruginosa (strain ATCC 15692 / PAO1 / 1C / PRS 101 / LMG 12228) GN=idh PE=4 SV=1	1	6	6	6	10.8	10.8	10.8	81.633	741	741	0	42.616	29823000	7				188	203;270;316;375;543;707	True;True;True;True;True;True	217;284;333;392;572;743	373;475;557;558;649;1017;1018;1347	454;585;687;688;813;1275;1276;1686	454;585;687;813;1275;1686
tr|Q9I0L5|Q9I0L5_PSEAE	tr|Q9I0L5|Q9I0L5_PSEAE	8	8	8	>tr|Q9I0L5|Q9I0L5_PSEAE Isocitrate dehydrogenase [NADP] OS=Pseudomonas aeruginosa (strain ATCC 15692 / PAO1 / 1C / PRS 101 / LMG 12228) GN=icd PE=3 SV=1	1	8	8	8	20.6	20.6	20.6	45.577	418	418	0	68.694	116800000	20				189	63;91;141;191;198;278;350;735	True;True;True;True;True;True;True;True	64;93;148;204;205;212;293;367;772	112;113;164;165;253;350;351;352;353;364;365;488;489;614;615;616;1396	141;142;198;199;200;201;308;429;430;431;432;445;446;598;599;765;766;767;768;1753	142;200;308;429;445;598;766;1753	104;105;106	68;151;185
tr|Q9I0T0|Q9I0T0_PSEAE	tr|Q9I0T0|Q9I0T0_PSEAE	1	1	1	>tr|Q9I0T0|Q9I0T0_PSEAE Probable short-chain dehydrogenase OS=Pseudomonas aeruginosa (strain ATCC 15692 / PAO1 / 1C / PRS 101 / LMG 12228) GN=PA2554 PE=3 SV=1	1	1	1	1	6.7	6.7	6.7	26.426	255	255	0	13.34	474000	2				190	358	TRUE	375	626;627	782;783	783	107	129
tr|Q9I0T1|Q9I0T1_PSEAE	tr|Q9I0T1|Q9I0T1_PSEAE	5	5	5	>tr|Q9I0T1|Q9I0T1_PSEAE Probable acyl-CoA thiolase OS=Pseudomonas aeruginosa (strain ATCC 15692 / PAO1 / 1C / PRS 101 / LMG 12228) GN=PA2553 PE=3 SV=1	1	5	5	5	15.2	15.2	15.2	41.4	396	396	0	31.675	26772000	5				191	140;147;193;239;627	True;True;True;True;True	147;156;207;253;659;660	252;266;355;426;1206;1207	307;329;434;527;1518;1519	307;329;434;527;1518	108	17
tr|Q9I0T2|Q9I0T2_PSEAE	tr|Q9I0T2|Q9I0T2_PSEAE	1	1	1	>tr|Q9I0T2|Q9I0T2_PSEAE Probable acyl-CoA dehydrogenase OS=Pseudomonas aeruginosa (strain ATCC 15692 / PAO1 / 1C / PRS 101 / LMG 12228) GN=PA2552 PE=3 SV=1	1	1	1	1	2.7	2.7	2.7	40.908	375	375	0.0047619	5.9332	1561200	1				192	275	TRUE	290	484	594	594
tr|Q9I1E7|Q9I1E7_PSEAE	tr|Q9I1E7|Q9I1E7_PSEAE	1	1	1	>tr|Q9I1E7|Q9I1E7_PSEAE Alkyl hydroperoxide reductase AhpD OS=Pseudomonas aeruginosa (strain ATCC 15692 / PAO1 / 1C / PRS 101 / LMG 12228) GN=PA2331 PE=4 SV=1	1	1	1	1	6.5	6.5	6.5	19.904	186	186	0	8.3749	1905600	1				193	207	TRUE	221	378	459	459
tr|Q9I1H5|Q9I1H5_PSEAE	tr|Q9I1H5|Q9I1H5_PSEAE	4	4	4	>tr|Q9I1H5|Q9I1H5_PSEAE Chitinase OS=Pseudomonas aeruginosa (strain ATCC 15692 / PAO1 / 1C / PRS 101 / LMG 12228) GN=chiC PE=3 SV=1	1	4	4	4	9.3	9.3	9.3	53.042	483	483	0	24.544	9697200	3				194	266;281;527;651	True;True;True;True	280;296;556;687	467;493;991;1255	576;603;1240;1578	576;603;1240;1578	109	178
tr|Q9I1N7|Q9I1N7_PSEAE	tr|Q9I1N7|Q9I1N7_PSEAE	1	1	1	>tr|Q9I1N7|Q9I1N7_PSEAE PslB OS=Pseudomonas aeruginosa (strain ATCC 15692 / PAO1 / 1C / PRS 101 / LMG 12228) GN=pslB PE=3 SV=1	1	1	1	1	2.7	2.7	2.7	53.515	488	488	0	13.269	1104800	2				195	160	TRUE	171	294;295	358;359	359
tr|Q9I246|Q9I246_PSEAE	tr|Q9I246|Q9I246_PSEAE	4	4	4	>tr|Q9I246|Q9I246_PSEAE Probable carbamoyl transferase OS=Pseudomonas aeruginosa (strain ATCC 15692 / PAO1 / 1C / PRS 101 / LMG 12228) GN=PA2069 PE=4 SV=1	1	4	4	4	9.6	9.6	9.6	63.382	574	574	0	25.875	19505000	4				196	192;209;340;568	True;True;True;True	206;223;357;598	354;381;598;599;1063;1064	433;464;745;746;1334;1335	433;464;746;1335	110	353
tr|Q9I2U9|Q9I2U9_PSEAE	tr|Q9I2U9|Q9I2U9_PSEAE	4	4	4	>tr|Q9I2U9|Q9I2U9_PSEAE Peptidyl-prolyl cis-trans isomerase OS=Pseudomonas aeruginosa (strain ATCC 15692 / PAO1 / 1C / PRS 101 / LMG 12228) GN=ppiB PE=3 SV=1	1	4	4	4	32.7	32.7	32.7	18.126	165	165	0	30.81	40148000	9				197	71;377;406;565	True;True;True;True	72;394;424;595	127;128;652;653;654;700;1060	156;157;816;817;818;819;820;870;1331	156;817;870;1331
tr|Q9I2V3|Q9I2V3_PSEAE	tr|Q9I2V3|Q9I2V3_PSEAE	1	1	1	>tr|Q9I2V3|Q9I2V3_PSEAE Uncharacterized protein OS=Pseudomonas aeruginosa (strain ATCC 15692 / PAO1 / 1C / PRS 101 / LMG 12228) GN=PA1789 PE=1 SV=1	1	1	1	1	5.2	5.2	5.2	31.273	287	287	0	9.3325	24358000	3				198	312	TRUE	329	550;551;552	678;679;680	680
tr|Q9I2W9|Q9I2W9_PSEAE	tr|Q9I2W9|Q9I2W9_PSEAE	6	6	6	>tr|Q9I2W9|Q9I2W9_PSEAE Phosphoenolpyruvate synthase OS=Pseudomonas aeruginosa (strain ATCC 15692 / PAO1 / 1C / PRS 101 / LMG 12228) GN=ppsA PE=3 SV=1	1	6	6	6	9.1	9.1	9.1	85.816	791	791	0	52.987	31064000	10				199	25;60;172;385;404;582	True;True;True;True;True;True	25;61;184;402;422;612	44;107;108;319;320;664;665;696;1092	57;135;136;137;388;389;830;831;865;1369	57;136;388;831;865;1369
tr|Q9I2Z1|Q9I2Z1_PSEAE	tr|Q9I2Z1|Q9I2Z1_PSEAE	1	1	1	>tr|Q9I2Z1|Q9I2Z1_PSEAE Uncharacterized protein OS=Pseudomonas aeruginosa (strain ATCC 15692 / PAO1 / 1C / PRS 101 / LMG 12228) GN=PA1746 PE=4 SV=1	1	1	1	1	6.5	6.5	6.5	18.189	168	168	0	6.8278	15535000	2				200	87	TRUE	89	154;155	188;189	189
tr|Q9I3D3|Q9I3D3_PSEAE	tr|Q9I3D3|Q9I3D3_PSEAE	6	6	6	>tr|Q9I3D3|Q9I3D3_PSEAE 2-oxoglutarate dehydrogenase (E1 subunit) OS=Pseudomonas aeruginosa (strain ATCC 15692 / PAO1 / 1C / PRS 101 / LMG 12228) GN=sucA PE=4 SV=1	1	6	6	6	7.8	7.8	7.8	105.88	943	943	0	41.294	36557000	6				201	243;279;345;430;431;466	True;True;True;True;True;True	257;294;362;450;451;487	430;490;491;607;748;749;750;808	531;600;601;754;930;931;932;996	531;601;754;930;932;996
tr|Q9I3D4|Q9I3D4_PSEAE	tr|Q9I3D4|Q9I3D4_PSEAE	3	3	3	>tr|Q9I3D4|Q9I3D4_PSEAE Succinate dehydrogenase (B subunit) OS=Pseudomonas aeruginosa (strain ATCC 15692 / PAO1 / 1C / PRS 101 / LMG 12228) GN=sdhB PE=4 SV=1	1	3	3	3	17.4	17.4	17.4	26.155	235	235	0	23.095	32873000	6				202	371;452;685	True;True;True	388;472;721	645;787;788;1309;1310	808;809;975;976;1640;1641	808;975;1640
tr|Q9I3D5|Q9I3D5_PSEAE	tr|Q9I3D5|Q9I3D5_PSEAE	6	6	6	>tr|Q9I3D5|Q9I3D5_PSEAE Succinate dehydrogenase flavoprotein subunit OS=Pseudomonas aeruginosa (strain ATCC 15692 / PAO1 / 1C / PRS 101 / LMG 12228) GN=sdhA PE=3 SV=1	1	6	6	6	12.2	12.2	12.2	63.531	590	590	0	38.977	29562000	7				203	99;205;212;234;379;612	True;True;True;True;True;True	103;219;226;248;396;644	182;375;376;384;385;419;656;1177;1178	222;456;457;467;468;518;822;1477;1478	222;457;467;518;822;1478
tr|Q9I3G2|Q9I3G2_PSEAE	tr|Q9I3G2|Q9I3G2_PSEAE	1	1	1	>tr|Q9I3G2|Q9I3G2_PSEAE Cbb3-type cytochrome c oxidase subunit OS=Pseudomonas aeruginosa (strain ATCC 15692 / PAO1 / 1C / PRS 101 / LMG 12228) GN=ccoP2 PE=3 SV=1	1	1	1	1	4.5	4.5	4.5	33.812	308	308	0.0093897	5.8514	642000	0				204	204	TRUE	218	374	455	455
tr|Q9I4I1|Q9I4I1_PSEAE	tr|Q9I4I1|Q9I4I1_PSEAE	3	3	3	>tr|Q9I4I1|Q9I4I1_PSEAE Ribonucleoside-diphosphate reductase OS=Pseudomonas aeruginosa (strain ATCC 15692 / PAO1 / 1C / PRS 101 / LMG 12228) GN=nrdA PE=3 SV=1	1	3	3	3	4.2	4.2	4.2	107.11	963	963	0	20.879	5667800	3				205	201;482;729	True;True;True	215;508;766	370;371;837;1385;1386	451;452;1033;1737;1738	452;1033;1738
tr|Q9I4S1|Q9I4S1_PSEAE	tr|Q9I4S1|Q9I4S1_PSEAE	2	2	2	>tr|Q9I4S1|Q9I4S1_PSEAE Uncharacterized protein OS=Pseudomonas aeruginosa (strain ATCC 15692 / PAO1 / 1C / PRS 101 / LMG 12228) GN=PA1053 PE=4 SV=1	1	2	2	2	23.4	23.4	23.4	15.649	154	154	0	23.722	7082200	3				206	104;626	True;True	108;658	189;1205	231;1516;1517	231;1517
tr|Q9I4W5|Q9I4W5_PSEAE	tr|Q9I4W5|Q9I4W5_PSEAE	1	1	1	>tr|Q9I4W5|Q9I4W5_PSEAE Bacterioferritin comigratory protein OS=Pseudomonas aeruginosa (strain ATCC 15692 / PAO1 / 1C / PRS 101 / LMG 12228) GN=bcp PE=4 SV=1	1	1	1	1	12.1	12.1	12.1	17.352	157	157	0	10.846	10037000	3				207	528	TRUE	557	992;993	1241;1242;1243	1242
tr|Q9I4X1|Q9I4X1_PSEAE	tr|Q9I4X1|Q9I4X1_PSEAE	2	2	2	>tr|Q9I4X1|Q9I4X1_PSEAE PqsC OS=Pseudomonas aeruginosa (strain ATCC 15692 / PAO1 / 1C / PRS 101 / LMG 12228) GN=pqsC PE=4 SV=1	1	2	2	2	6.6	6.6	6.6	38.238	348	348	0	13.128	4786500	3				208	433;490	True;True	453;516	753;754;910	935;936;1142	935;1142
tr|Q9I4X2|Q9I4X2_PSEAE	tr|Q9I4X2|Q9I4X2_PSEAE	1	1	1	>tr|Q9I4X2|Q9I4X2_PSEAE PqsB OS=Pseudomonas aeruginosa (strain ATCC 15692 / PAO1 / 1C / PRS 101 / LMG 12228) GN=pqsB PE=4 SV=1	1	1	1	1	4.2	4.2	4.2	30.5	283	283	0	8.4609	6803200	1				209	364	TRUE	381	635;636	795;796	795
tr|Q9I5F6|Q9I5F6_PSEAE	tr|Q9I5F6|Q9I5F6_PSEAE	1	1	1	>tr|Q9I5F6|Q9I5F6_PSEAE Bifunctional protein PutA OS=Pseudomonas aeruginosa (strain ATCC 15692 / PAO1 / 1C / PRS 101 / LMG 12228) GN=putA PE=3 SV=1	1	1	1	1	1.4	1.4	1.4	115.63	1060	1060	0	6.5991	9675400	2				210	711	TRUE	747	1353;1354	1693;1694	1694
tr|Q9I5I5|Q9I5I5_PSEAE	tr|Q9I5I5|Q9I5I5_PSEAE	1	1	1	>tr|Q9I5I5|Q9I5I5_PSEAE Probable enoyl-CoA hydratase/isomerase OS=Pseudomonas aeruginosa (strain ATCC 15692 / PAO1 / 1C / PRS 101 / LMG 12228) GN=PA0744 PE=4 SV=1	1	1	1	1	2.5	2.5	2.5	40.589	367	367	0	6.3079	1728000	2				211	762	TRUE	799	1449;1450	1839;1840	1839
tr|Q9I5U9|Q9I5U9_PSEAE	tr|Q9I5U9|Q9I5U9_PSEAE	12	12	12	>tr|Q9I5U9|Q9I5U9_PSEAE Uncharacterized protein OS=Pseudomonas aeruginosa (strain ATCC 15692 / PAO1 / 1C / PRS 101 / LMG 12228) GN=PA0588 PE=4 SV=1	1	12	12	12	20.5	20.5	20.5	73.722	640	640	0	117.71	126190000	25				212	4;131;285;411;419;426;458;489;513;566;609;708	True;True;True;True;True;True;True;True;True;True;True;True	4;136;300;429;437;446;478;515;542;596;641;744	8;9;233;234;498;708;709;710;711;724;725;741;742;796;797;908;909;962;963;964;1061;1173;1174;1348	8;9;283;284;285;613;878;879;880;881;899;900;921;922;984;985;1140;1141;1204;1205;1206;1332;1473;1474;1687	9;283;613;878;899;921;984;1140;1204;1332;1474;1687	111	412
tr|Q9I5Y8|Q9I5Y8_PSEAE	tr|Q9I5Y8|Q9I5Y8_PSEAE	2	2	2	>tr|Q9I5Y8|Q9I5Y8_PSEAE Transketolase OS=Pseudomonas aeruginosa (strain ATCC 15692 / PAO1 / 1C / PRS 101 / LMG 12228) GN=tktA PE=1 SV=1	1	2	2	2	3.8	3.8	3.8	72.219	665	665	0	13.393	11275000	3				213	171;686	True;True	183;722	317;318;1311	386;387;1642	387;1642
tr|Q9I612|Q9I612_PSEAE	tr|Q9I612|Q9I612_PSEAE	1	1	1	>tr|Q9I612|Q9I612_PSEAE Probable acyl-CoA dehydrogenase OS=Pseudomonas aeruginosa (strain ATCC 15692 / PAO1 / 1C / PRS 101 / LMG 12228) GN=PA0506 PE=3 SV=1	1	1	1	1	2	2	2	65.358	601	601	0.0048077	5.958	1255800	1				214	190	TRUE	203	349	428	428
tr|Q9I659|Q9I659_PSEAE	tr|Q9I659|Q9I659_PSEAE	4	3	3	>tr|Q9I659|Q9I659_PSEAE Probable ClpA/B protease ATP binding subunit OS=Pseudomonas aeruginosa (strain ATCC 15692 / PAO1 / 1C / PRS 101 / LMG 12228) GN=PA0459 PE=4 SV=1	1	4	3	3	6.1	4.6	4.6	94.174	850	850	0	18.921	6384600	2				215	448;486;512;652	True;True;False;True	468;512;541;688	780;903;961;1256	966;1135;1203;1579	966;1135;1203;1579
tr|Q9I671|Q9I671_PSEAE	tr|Q9I671|Q9I671_PSEAE	2	2	2	>tr|Q9I671|Q9I671_PSEAE Glutaryl-CoA dehydrogenase OS=Pseudomonas aeruginosa (strain ATCC 15692 / PAO1 / 1C / PRS 101 / LMG 12228) GN=gcdH PE=3 SV=1	1	2	2	2	5.6	5.6	5.6	43.311	393	393	0	15.986	31206000	5				216	81;262	True;True	82;276	144;458;459;460;461	173;566;567;568;569;570	173;570
tr|Q9I687|Q9I687_PSEAE	tr|Q9I687|Q9I687_PSEAE	1	1	1	>tr|Q9I687|Q9I687_PSEAE Methylenetetrahydrofolate reductase OS=Pseudomonas aeruginosa (strain ATCC 15692 / PAO1 / 1C / PRS 101 / LMG 12228) GN=metF PE=3 SV=1	1	1	1	1	3.1	3.1	3.1	32.228	290	290	0.0047393	5.9068	1173400	1				217	196	TRUE	210	361	441	441
tr|Q9I6H5|Q9I6H5_PSEAE	tr|Q9I6H5|Q9I6H5_PSEAE	3	3	3	>tr|Q9I6H5|Q9I6H5_PSEAE D-3-phosphoglycerate dehydrogenase OS=Pseudomonas aeruginosa (strain ATCC 15692 / PAO1 / 1C / PRS 101 / LMG 12228) GN=serA PE=3 SV=1	1	3	3	3	9	9	9	44.216	409	409	0	17.414	10934000	3				218	3;187;271	True;True;True	3;200;285	7;346;476;477	7;425;586;587	7;425;586
tr|Q9I6Z3|Q9I6Z3_PSEAE	tr|Q9I6Z3|Q9I6Z3_PSEAE	7	7	7	>tr|Q9I6Z3|Q9I6Z3_PSEAE Alkyl hydroperoxide reductase subunit C OS=Pseudomonas aeruginosa (strain ATCC 15692 / PAO1 / 1C / PRS 101 / LMG 12228) GN=ahpC PE=4 SV=1	1	7	7	7	44.9	44.9	44.9	20.541	187	187	0	64.519	211370000	20				219	29;180;255;575;616;637;731	True;True;True;True;True;True;True	29;193;269;605;648;670;768	51;52;53;54;334;335;448;449;1080;1081;1183;1184;1227;1228;1229;1230;1388;1389;1390;1391	64;65;66;67;406;407;408;555;556;1351;1352;1483;1484;1545;1546;1547;1548;1740;1741;1742;1743	67;406;556;1352;1483;1546;1743
tr|Q9I762|Q9I762_PSEAE	tr|Q9I762|Q9I762_PSEAE	2	2	2	>tr|Q9I762|Q9I762_PSEAE Uncharacterized protein OS=Pseudomonas aeruginosa (strain ATCC 15692 / PAO1 / 1C / PRS 101 / LMG 12228) GN=PA0070 PE=4 SV=1	1	2	2	2	7.6	7.6	7.6	31.716	304	304	0	12.172	2020200	1				220	34;125	True;True	35;130	62;223	77;270	77;270
tr|Q9I765|Q9I765_PSEAE	tr|Q9I765|Q9I765_PSEAE	1	1	1	>tr|Q9I765|Q9I765_PSEAE Oligopeptidase A OS=Pseudomonas aeruginosa (strain ATCC 15692 / PAO1 / 1C / PRS 101 / LMG 12228) GN=prlC PE=3 SV=1	1	1	1	1	1.8	1.8	1.8	76.043	681	681	0	6.3807	1320100	1				221	584	TRUE	614	1095	1372	1372

## Sheet: 1-1 Sheet1
Protein IDs-C4HSL (full)
REV__tr|Q9HXW2|Q9HXW2_PSEAE
REV__tr|Q9I4Y7|Q9I4Y7_PSEAE
sp|G3XD61|WBPI_PSEAE
sp|G3XD76|DAPD_PSEAE
sp|G3XD94|UGND_PSEAE
sp|O30508|ARUC_PSEAE
sp|O50175|ASTB_PSEAE
sp|O52759|RS4_PSEAE
sp|O52760|RPOA_PSEAE
sp|O52761|RL17_PSEAE
sp|O52762|CATA_PSEAE
sp|O54439|ACP1_PSEAE
sp|O68822|AMPA_PSEAE
sp|O69753|PHZB1_PSEAE;sp|Q9S508|PHZB2_PSEAE
sp|O69754|PHZF_PSEAE
sp|O82850|RS2_PSEAE
sp|O82851|EFTS_PSEAE
sp|O86428|ILVE_PSEAE
sp|O87125|CHEB1_PSEAE
sp|P04739|FMPO_PSEAE
sp|P05384|DBHB_PSEAE
sp|P08280|RECA_PSEAE
sp|P08308|OTCC_PSEAE
sp|P09591|EFTU_PSEAE
sp|P11221|OPRI_PSEAE
sp|P13794|PORF_PSEAE
sp|P13981|ARCA_PSEAE
sp|P13982|ARCC_PSEAE
sp|P14165|CISY_PSEAE
sp|P28810|MMSA_PSEAE
sp|P30718|CH60_PSEAE
sp|P30720|CH10_PSEAE
sp|P32722|PORD_PSEAE
sp|P37798|ACCC_PSEAE
sp|P37799|BCCP_PSEAE
sp|P38100|CARB_PSEAE
sp|P43334|PH4H_PSEAE
sp|P43336|PHHC_PSEAE
sp|P47203|FTSA_PSEAE
sp|P47204|FTSZ_PSEAE
sp|P53593|SUCC_PSEAE
sp|P53641|SODF_PSEAE
sp|P54292|RHLR_PSEAE
sp|P57112|STHA_PSEAE
sp|P72173|AAT_PSEAE
sp|Q51422|SYDND_PSEAE
sp|Q51561|RPOB_PSEAE
sp|Q51567|SUCD_PSEAE
sp|Q59636|NDK_PSEAE
sp|Q59637|ODP1_PSEAE
sp|Q59638|ODP2_PSEAE
sp|Q9HT14|ATP6_PSEAE
sp|Q9HT16|ATPF_PSEAE
sp|Q9HT18|ATPA_PSEAE
sp|Q9HT19|ATPG_PSEAE
sp|Q9HT20|ATPB_PSEAE
sp|Q9HT21|ATPE_PSEAE
sp|Q9HT95|ATSE4_PSEAE
sp|Q9HTD7|ASPA_PSEAE
sp|Q9HTF1|LTAE_PSEAE
sp|Q9HTN8|RL28_PSEAE
sp|Q9HTZ7|PCKA_PSEAE
sp|Q9HUC8|SYR_PSEAE
sp|Q9HUM6|PURA_PSEAE
sp|Q9HUM9|RS6_PSEAE
sp|Q9HV43|DNAK_PSEAE
sp|Q9HV55|IF2_PSEAE
sp|Q9HV59|PNP_PSEAE
sp|Q9HVA2|ILVC_PSEAE
sp|Q9HVC4|RL25_PSEAE
sp|Q9HVC5|KPRS_PSEAE
sp|Q9HVD1|PAGL_PSEAE
sp|Q9HVI7|GLYA3_PSEAE
sp|Q9HVL6|RL21_PSEAE
sp|Q9HVM4|SYI_PSEAE
sp|Q9HVN5|CLPB_PSEAE
sp|Q9HVT8|GATA_PSEAE
sp|Q9HVW7|MURA_PSEAE
sp|Q9HVY3|RS9_PSEAE
sp|Q9HW02|MURC_PSEAE
sp|Q9HW04|ARGJ_PSEAE
sp|Q9HW11|Y4395_PSEAE
sp|Q9HWC5|RL11_PSEAE
sp|Q9HWC7|RL10_PSEAE
sp|Q9HWC8|RL7_PSEAE
sp|Q9HWC9|RPOC_PSEAE
sp|Q9HWD1|RS7_PSEAE
sp|Q9HWD2|EFG1_PSEAE;sp|Q9I244|EFG2_PSEAE
sp|Q9HWD5|RL3_PSEAE
sp|Q9HWD8|RL2_PSEAE
sp|Q9HWE0|RL22_PSEAE
sp|Q9HWE1|RS3_PSEAE
sp|Q9HWE2|RL16_PSEAE
sp|Q9HWE4|RS17_PSEAE
sp|Q9HWE5|RL14_PSEAE
sp|Q9HWE6|RL24_PSEAE
sp|Q9HWE8|RS14_PSEAE
sp|Q9HWE9|RS8_PSEAE
sp|Q9HWF0|RL6_PSEAE
sp|Q9HWF1|RL18_PSEAE
sp|Q9HWF2|RS5_PSEAE
sp|Q9HWF3|RL30_PSEAE
sp|Q9HWF4|RL15_PSEAE
sp|Q9HWF7|RS13_PSEAE
sp|Q9HWF9|BFR_PSEAE
sp|Q9HX33|SYL_PSEAE
sp|Q9HXM6|GUAA_PSEAE
sp|Q9HXN2|PUR4_PSEAE
sp|Q9HXQ2|RL19_PSEAE
sp|Q9HXZ2|ACCA_PSEAE
sp|Q9HXZ4|PYRG_PSEAE
sp|Q9HXZ5|ENO_PSEAE
sp|Q9HYR9|CLPP2_PSEAE
sp|Q9HZ71|RS1_PSEAE
sp|Q9HZ76|WBPE_PSEAE
sp|Q9HZE0|DHE2_PSEAE
sp|Q9HZP5|ETFD_PSEAE
sp|Q9HZP6|ETFB_PSEAE
sp|Q9HZZ2|EFP_PSEAE
sp|Q9I0A4|SYFB_PSEAE
sp|Q9I0J6|NUOG_PSEAE
sp|Q9I0J9|NUOCD_PSEAE
sp|Q9I0K4|ACEA_PSEAE
sp|Q9I137|GCSP1_PSEAE
sp|Q9I1L9|DLDH1_PSEAE
sp|Q9I1M0|ODB2_PSEAE
sp|Q9I2A8|ATOB_PSEAE
sp|Q9I2U0|CLPX_PSEAE
sp|Q9I2U8|SYQ_PSEAE
sp|Q9I2V5|ACNB_PSEAE
sp|Q9I3C5|HTPG_PSEAE
sp|Q9I3D1|DLDH2_PSEAE
sp|Q9I3F5|ACNA_PSEAE
sp|Q9I3I0|Y1533_PSEAE
sp|Q9I4G3|NAPA_PSEAE
sp|Q9I4W0|PUR7_PSEAE
sp|Q9I4W3|DAPA_PSEAE
sp|Q9I4Z4|PAL_PSEAE
sp|Q9I502|SYP_PSEAE
sp|Q9I513|PUR5_PSEAE
sp|Q9I558|ACSA1_PSEAE
sp|Q9I576|HPPD_PSEAE
sp|Q9I589|CBPD_PSEAE
sp|Q9I5V8|RS21_PSEAE
sp|Q9I5Y1|ALF_PSEAE
sp|Q9I5Y4|PGK_PSEAE
sp|Q9I5Z0|METK_PSEAE
sp|Q9I685|SAHH_PSEAE
sp|Q9I690|Y423_PSEAE
sp|Q9I6M4|DAVT_PSEAE
sp|Q9I6M5|DAVD_PSEAE
sp|Q9I747|HCP1_PSEAE
sp|Q9I7C2|GYRB_PSEAE
sp|Q9I7C4|DPO3B_PSEAE
sp|Q9LCT3|SECA_PSEAE
sp|Q9X2T1|THIO_PSEAE
tr|G3XCT6|G3XCT6_PSEAE
tr|G3XD11|G3XD11_PSEAE
tr|Q9HTD1|Q9HTD1_PSEAE
tr|Q9HTD9|Q9HTD9_PSEAE
tr|Q9HTP2|Q9HTP2_PSEAE
tr|Q9HU11|Q9HU11_PSEAE
tr|Q9HUC3|Q9HUC3_PSEAE
tr|Q9HUD3|Q9HUD3_PSEAE
tr|Q9HV54|Q9HV54_PSEAE
tr|Q9HV96|Q9HV96_PSEAE
tr|Q9HVJ1|Q9HVJ1_PSEAE
tr|Q9HVS8|Q9HVS8_PSEAE
tr|Q9HVV5|Q9HVV5_PSEAE
tr|Q9HVY4|Q9HVY4_PSEAE
tr|Q9HVY6|Q9HVY6_PSEAE
tr|Q9HW49|Q9HW49_PSEAE
tr|Q9HW72|Q9HW72_PSEAE
tr|Q9HW86|Q9HW86_PSEAE
tr|Q9HWG9|Q9HWG9_PSEAE
tr|Q9HWQ0|Q9HWQ0_PSEAE
tr|Q9HWR8|Q9HWR8_PSEAE
tr|Q9HWT7|Q9HWT7_PSEAE
tr|Q9HWV0|Q9HWV0_PSEAE
tr|Q9HWW1|Q9HWW1_PSEAE
tr|Q9HX05|Q9HX05_PSEAE;tr|Q9I2C4|Q9I2C4_PSEAE
tr|Q9HX12|Q9HX12_PSEAE
tr|Q9HX76|Q9HX76_PSEAE
tr|Q9HXI0|Q9HXI0_PSEAE
tr|Q9HXM5|Q9HXM5_PSEAE
tr|Q9HXR8|Q9HXR8_PSEAE
tr|Q9HXU8|Q9HXU8_PSEAE
tr|Q9HXU9|Q9HXU9_PSEAE
tr|Q9HY01|Q9HY01_PSEAE
tr|Q9HY12|Q9HY12_PSEAE
tr|Q9HY13|Q9HY13_PSEAE
tr|Q9HY77|Q9HY77_PSEAE
tr|Q9HY79|Q9HY79_PSEAE
tr|Q9HY81|Q9HY81_PSEAE
tr|Q9HYK7|Q9HYK7_PSEAE
tr|Q9HYT5|Q9HYT5_PSEAE
tr|Q9HZ86|Q9HZ86_PSEAE
tr|Q9HZK4|Q9HZK4_PSEAE
tr|Q9HZM8|Q9HZM8_PSEAE
tr|Q9I0H1|Q9I0H1_PSEAE
tr|Q9I0L4|Q9I0L4_PSEAE
tr|Q9I0L5|Q9I0L5_PSEAE
tr|Q9I0T0|Q9I0T0_PSEAE
tr|Q9I0T1|Q9I0T1_PSEAE
tr|Q9I140|Q9I140_PSEAE
tr|Q9I1E7|Q9I1E7_PSEAE
tr|Q9I1E8|Q9I1E8_PSEAE
tr|Q9I1H3|Q9I1H3_PSEAE
tr|Q9I1H5|Q9I1H5_PSEAE
tr|Q9I1N4|Q9I1N4_PSEAE
tr|Q9I1N7|Q9I1N7_PSEAE
tr|Q9I210|Q9I210_PSEAE
tr|Q9I246|Q9I246_PSEAE
tr|Q9I296|Q9I296_PSEAE
tr|Q9I2A2|Q9I2A2_PSEAE
tr|Q9I2A9|Q9I2A9_PSEAE
tr|Q9I2R2|Q9I2R2_PSEAE
tr|Q9I2V3|Q9I2V3_PSEAE
tr|Q9I2W9|Q9I2W9_PSEAE
tr|Q9I2Z1|Q9I2Z1_PSEAE
tr|Q9I315|Q9I315_PSEAE
tr|Q9I3D3|Q9I3D3_PSEAE
tr|Q9I3D4|Q9I3D4_PSEAE
tr|Q9I3D5|Q9I3D5_PSEAE
tr|Q9I4I1|Q9I4I1_PSEAE
tr|Q9I4S1|Q9I4S1_PSEAE
tr|Q9I4S6|Q9I4S6_PSEAE
tr|Q9I4W5|Q9I4W5_PSEAE
tr|Q9I4X1|Q9I4X1_PSEAE
tr|Q9I4Z7|Q9I4Z7_PSEAE
tr|Q9I5E3|Q9I5E3_PSEAE
tr|Q9I5F6|Q9I5F6_PSEAE
tr|Q9I5I4|Q9I5I4_PSEAE
tr|Q9I5U9|Q9I5U9_PSEAE
tr|Q9I5Y8|Q9I5Y8_PSEAE
tr|Q9I659|Q9I659_PSEAE
tr|Q9I671|Q9I671_PSEAE
tr|Q9I688|Q9I688_PSEAE
tr|Q9I689|Q9I689_PSEAE
tr|Q9I6A1|Q9I6A1_PSEAE
tr|Q9I6H5|Q9I6H5_PSEAE
tr|Q9I6Z3|Q9I6Z3_PSEAE
tr|Q9I745|Q9I745_PSEAE
tr|Q9I762|Q9I762_PSEAE
Probe 12 (subtracted)
REV__sp|Q9HVN5|CLPB_PSEAE
sp|O54438|FABG_PSEAE
sp|O68560|RATA_PSEAE
sp|P57668|TPX_PSEAE
sp|P95454|RLME_PSEAE
sp|Q9HU65|GLNA_PSEAE
sp|Q9HUM0|HFQ_PSEAE
sp|Q9HUN2|RL9_PSEAE
sp|Q9HVM1|RS20_PSEAE
sp|Q9HWC6|RL1_PSEAE
sp|Q9HWE7|RL5_PSEAE
sp|Q9HXV4|KAD_PSEAE
sp|Q9I0A2|RL20_PSEAE
sp|Q9I6G2|Y329_PSEAE
sp|Q9S646|PPK_PSEAE
tr|Q9HUG0|Q9HUG0_PSEAE
tr|Q9HW32|Q9HW32_PSEAE
tr|Q9HWH2|Q9HWH2_PSEAE
tr|Q9HXI3|Q9HXI3_PSEAE
tr|Q9HZ48|Q9HZ48_PSEAE
tr|Q9I028|Q9I028_PSEAE
tr|Q9I0T2|Q9I0T2_PSEAE
tr|Q9I2U9|Q9I2U9_PSEAE
tr|Q9I3G2|Q9I3G2_PSEAE
tr|Q9I4X2|Q9I4X2_PSEAE
tr|Q9I5I5|Q9I5I5_PSEAE
tr|Q9I612|Q9I612_PSEAE
tr|Q9I687|Q9I687_PSEAE
tr|Q9I765|Q9I765_PSEAE

## Sheet: 1-1 Sheet2
Protein IDs-Probe 12 (subtracted)	Protein IDs-Probe 12 (full)			Fasta headers	Number of proteins	Peptides	Razor + unique peptides
REV__sp|Q9HVN5|CLPB_PSEAE	REV__sp|Q9HVN5|CLPB_PSEAE			>sp|Q9HVN5|CLPB_PSEAE Chaperone protein ClpB OS=Pseudomonas aeruginosa (strain ATCC 15692 / PAO1 / 1C / PRS 101 / LMG 12228) GN=clpB PE=3 SV=1	1	1	1
sp|O54438|FABG_PSEAE	REV__tr|Q9HXW2|Q9HXW2_PSEAE			>tr|Q9HXW2|Q9HXW2_PSEAE Probable transcriptional regulator OS=Pseudomonas aeruginosa (strain ATCC 15692 / PAO1 / 1C / PRS 101 / LMG 12228) GN=PA3678 PE=4 SV=1	1	1	1
sp|O68560|RATA_PSEAE	sp|G3XD61|WBPI_PSEAE			>sp|G3XD61|WBPI_PSEAE UDP-2,3-diacetamido-2,3-dideoxy-D-glucuronate 2-epimerase OS=Pseudomonas aeruginosa (strain ATCC 15692 / PAO1 / 1C / PRS 101 / LMG 12228) GN=wbpI PE=1 SV=1	1	1	1
sp|P57668|TPX_PSEAE	sp|G3XD76|DAPD_PSEAE			>sp|G3XD76|DAPD_PSEAE 2,3,4,5-tetrahydropyridine-2,6-dicarboxylate N-succinyltransferase OS=Pseudomonas aeruginosa (strain ATCC 15692 / PAO1 / 1C / PRS 101 / LMG 12228) GN=dapD PE=1 SV=1	1	1	1
sp|P95454|RLME_PSEAE	sp|O50175|ASTB_PSEAE			>sp|O50175|ASTB_PSEAE N-succinylarginine dihydrolase OS=Pseudomonas aeruginosa (strain ATCC 15692 / PAO1 / 1C / PRS 101 / LMG 12228) GN=astB PE=3 SV=1	1	1	1
sp|Q9HU65|GLNA_PSEAE	sp|O52759|RS4_PSEAE			>sp|O52759|RS4_PSEAE 30S ribosomal protein S4 OS=Pseudomonas aeruginosa (strain ATCC 15692 / PAO1 / 1C / PRS 101 / LMG 12228) GN=rpsD PE=3 SV=2	1	3	3
sp|Q9HUM0|HFQ_PSEAE	sp|O52760|RPOA_PSEAE			>sp|O52760|RPOA_PSEAE DNA-directed RNA polymerase subunit alpha OS=Pseudomonas aeruginosa (strain ATCC 15692 / PAO1 / 1C / PRS 101 / LMG 12228) GN=rpoA PE=3 SV=2	1	6	6
sp|Q9HUN2|RL9_PSEAE	sp|O52761|RL17_PSEAE			>sp|O52761|RL17_PSEAE 50S ribosomal protein L17 OS=Pseudomonas aeruginosa (strain ATCC 15692 / PAO1 / 1C / PRS 101 / LMG 12228) GN=rplQ PE=3 SV=1	1	1	1
sp|Q9HVM1|RS20_PSEAE	sp|O52762|CATA_PSEAE			>sp|O52762|CATA_PSEAE Catalase OS=Pseudomonas aeruginosa (strain ATCC 15692 / PAO1 / 1C / PRS 101 / LMG 12228) GN=katA PE=1 SV=1	1	5	5
sp|Q9HWC6|RL1_PSEAE	sp|O54438|FABG_PSEAE			>sp|O54438|FABG_PSEAE 3-oxoacyl-[acyl-carrier-protein] reductase FabG OS=Pseudomonas aeruginosa (strain ATCC 15692 / PAO1 / 1C / PRS 101 / LMG 12228) GN=fabG PE=1 SV=1	1	1	1
sp|Q9HWE7|RL5_PSEAE	sp|O68560|RATA_PSEAE			>sp|O68560|RATA_PSEAE Ribosome association toxin RatA OS=Pseudomonas aeruginosa (strain ATCC 15692 / PAO1 / 1C / PRS 101 / LMG 12228) GN=ratA PE=3 SV=1	1	1	1
sp|Q9HXV4|KAD_PSEAE	sp|O69753|PHZB1_PSEAE;sp|Q9S508|PHZB2_PSEAE			>sp|O69753|PHZB1_PSEAE Phenazine biosynthesis protein PhzB 1 OS=Pseudomonas aeruginosa (strain ATCC 15692 / PAO1 / 1C / PRS 101 / LMG 12228) GN=phzB1 PE=3 SV=1;>sp|Q9S508|PHZB2_PSEAE Phenazine biosynthesis protein PhzB 2 OS=Pseudomonas aeruginosa (strain A	2	4	4
sp|Q9I0A2|RL20_PSEAE	sp|O69754|PHZF_PSEAE			>sp|O69754|PHZF_PSEAE Trans-2,3-dihydro-3-hydroxyanthranilate isomerase OS=Pseudomonas aeruginosa (strain ATCC 15692 / PAO1 / 1C / PRS 101 / LMG 12228) GN=phzF1 PE=3 SV=2	1	1	1
sp|Q9I6G2|Y329_PSEAE	sp|O82850|RS2_PSEAE			>sp|O82850|RS2_PSEAE 30S ribosomal protein S2 OS=Pseudomonas aeruginosa (strain ATCC 15692 / PAO1 / 1C / PRS 101 / LMG 12228) GN=rpsB PE=3 SV=2	1	2	2
sp|Q9S646|PPK_PSEAE	sp|O82851|EFTS_PSEAE			>sp|O82851|EFTS_PSEAE Elongation factor Ts OS=Pseudomonas aeruginosa (strain ATCC 15692 / PAO1 / 1C / PRS 101 / LMG 12228) GN=tsf PE=3 SV=1	1	6	6
tr|Q9HUG0|Q9HUG0_PSEAE	sp|O86428|ILVE_PSEAE			>sp|O86428|ILVE_PSEAE Branched-chain-amino-acid aminotransferase OS=Pseudomonas aeruginosa (strain ATCC 15692 / PAO1 / 1C / PRS 101 / LMG 12228) GN=ilvE PE=1 SV=2	1	3	3
tr|Q9HW32|Q9HW32_PSEAE	sp|O87125|CHEB1_PSEAE			>sp|O87125|CHEB1_PSEAE Chemotaxis response regulator protein-glutamate methylesterase of group 1 operon OS=Pseudomonas aeruginosa (strain ATCC 15692 / PAO1 / 1C / PRS 101 / LMG 12228) GN=cheB1 PE=1 SV=2	1	1	1
tr|Q9HWH2|Q9HWH2_PSEAE	sp|P04739|FMPO_PSEAE			>sp|P04739|FMPO_PSEAE Fimbrial protein OS=Pseudomonas aeruginosa (strain ATCC 15692 / PAO1 / 1C / PRS 101 / LMG 12228) GN=pilA PE=1 SV=1	1	2	2
tr|Q9HXI3|Q9HXI3_PSEAE	sp|P05384|DBHB_PSEAE			>sp|P05384|DBHB_PSEAE DNA-binding protein HU-beta OS=Pseudomonas aeruginosa (strain ATCC 15692 / PAO1 / 1C / PRS 101 / LMG 12228) GN=hupB PE=1 SV=3	1	2	2
tr|Q9HZ48|Q9HZ48_PSEAE	sp|P08308|OTCC_PSEAE			>sp|P08308|OTCC_PSEAE Ornithine carbamoyltransferase, catabolic OS=Pseudomonas aeruginosa (strain ATCC 15692 / PAO1 / 1C / PRS 101 / LMG 12228) GN=arcB PE=1 SV=3	1	11	11
tr|Q9I028|Q9I028_PSEAE	sp|P09591|EFTU_PSEAE			>sp|P09591|EFTU_PSEAE Elongation factor Tu OS=Pseudomonas aeruginosa (strain ATCC 15692 / PAO1 / 1C / PRS 101 / LMG 12228) GN=tufA PE=1 SV=2	1	10	10
tr|Q9I0T2|Q9I0T2_PSEAE	sp|P11221|OPRI_PSEAE			>sp|P11221|OPRI_PSEAE Major outer membrane lipoprotein OS=Pseudomonas aeruginosa (strain ATCC 15692 / PAO1 / 1C / PRS 101 / LMG 12228) GN=oprI PE=3 SV=1	1	2	2
tr|Q9I2U9|Q9I2U9_PSEAE	sp|P13794|PORF_PSEAE			>sp|P13794|PORF_PSEAE Outer membrane porin F OS=Pseudomonas aeruginosa (strain ATCC 15692 / PAO1 / 1C / PRS 101 / LMG 12228) GN=oprF PE=1 SV=1	1	9	9
tr|Q9I3G2|Q9I3G2_PSEAE	sp|P13981|ARCA_PSEAE			>sp|P13981|ARCA_PSEAE Arginine deiminase OS=Pseudomonas aeruginosa (strain ATCC 15692 / PAO1 / 1C / PRS 101 / LMG 12228) GN=arcA PE=1 SV=2	1	12	12
tr|Q9I4X2|Q9I4X2_PSEAE	sp|P13982|ARCC_PSEAE			>sp|P13982|ARCC_PSEAE Carbamate kinase OS=Pseudomonas aeruginosa (strain ATCC 15692 / PAO1 / 1C / PRS 101 / LMG 12228) GN=arcC PE=3 SV=1	1	3	3
tr|Q9I5I5|Q9I5I5_PSEAE	sp|P28810|MMSA_PSEAE			>sp|P28810|MMSA_PSEAE Methylmalonate-semialdehyde dehydrogenase [acylating] OS=Pseudomonas aeruginosa (strain ATCC 15692 / PAO1 / 1C / PRS 101 / LMG 12228) GN=mmsA PE=1 SV=2	1	1	1
tr|Q9I612|Q9I612_PSEAE	sp|P30718|CH60_PSEAE			>sp|P30718|CH60_PSEAE 60 kDa chaperonin OS=Pseudomonas aeruginosa (strain ATCC 15692 / PAO1 / 1C / PRS 101 / LMG 12228) GN=groL PE=1 SV=3	1	17	17
tr|Q9I687|Q9I687_PSEAE	sp|P30720|CH10_PSEAE			>sp|P30720|CH10_PSEAE 10 kDa chaperonin OS=Pseudomonas aeruginosa (strain ATCC 15692 / PAO1 / 1C / PRS 101 / LMG 12228) GN=groS PE=3 SV=1	1	2	2
tr|Q9I765|Q9I765_PSEAE	sp|P32722|PORD_PSEAE			>sp|P32722|PORD_PSEAE Porin D OS=Pseudomonas aeruginosa (strain ATCC 15692 / PAO1 / 1C / PRS 101 / LMG 12228) GN=oprD PE=1 SV=1	1	2	2
	sp|P37798|ACCC_PSEAE			>sp|P37798|ACCC_PSEAE Biotin carboxylase OS=Pseudomonas aeruginosa (strain ATCC 15692 / PAO1 / 1C / PRS 101 / LMG 12228) GN=accC PE=1 SV=1	1	4	4
	sp|P37799|BCCP_PSEAE			>sp|P37799|BCCP_PSEAE Biotin carboxyl carrier protein of acetyl-CoA carboxylase OS=Pseudomonas aeruginosa (strain ATCC 15692 / PAO1 / 1C / PRS 101 / LMG 12228) GN=accB PE=3 SV=1	1	4	4
	sp|P38100|CARB_PSEAE			>sp|P38100|CARB_PSEAE Carbamoyl-phosphate synthase large chain OS=Pseudomonas aeruginosa (strain ATCC 15692 / PAO1 / 1C / PRS 101 / LMG 12228) GN=carB PE=3 SV=3	1	1	1
	sp|P43334|PH4H_PSEAE			>sp|P43334|PH4H_PSEAE Phenylalanine-4-hydroxylase OS=Pseudomonas aeruginosa (strain ATCC 15692 / PAO1 / 1C / PRS 101 / LMG 12228) GN=phhA PE=3 SV=2	1	1	1
	sp|P43336|PHHC_PSEAE			>sp|P43336|PHHC_PSEAE Aromatic-amino-acid aminotransferase OS=Pseudomonas aeruginosa (strain ATCC 15692 / PAO1 / 1C / PRS 101 / LMG 12228) GN=phhC PE=3 SV=2	1	2	2
	sp|P47204|FTSZ_PSEAE			>sp|P47204|FTSZ_PSEAE Cell division protein FtsZ OS=Pseudomonas aeruginosa (strain ATCC 15692 / PAO1 / 1C / PRS 101 / LMG 12228) GN=ftsZ PE=1 SV=2	1	1	1
	sp|P53593|SUCC_PSEAE			>sp|P53593|SUCC_PSEAE Succinyl-CoA ligase [ADP-forming] subunit beta OS=Pseudomonas aeruginosa (strain ATCC 15692 / PAO1 / 1C / PRS 101 / LMG 12228) GN=sucC PE=3 SV=2	1	7	7
	sp|P53641|SODF_PSEAE			>sp|P53641|SODF_PSEAE Superoxide dismutase [Fe] OS=Pseudomonas aeruginosa (strain ATCC 15692 / PAO1 / 1C / PRS 101 / LMG 12228) GN=sodB PE=3 SV=3	1	3	3
	sp|P57668|TPX_PSEAE			>sp|P57668|TPX_PSEAE Probable thiol peroxidase OS=Pseudomonas aeruginosa (strain ATCC 15692 / PAO1 / 1C / PRS 101 / LMG 12228) GN=tpx PE=3 SV=1	1	1	1
	sp|P72173|AAT_PSEAE			>sp|P72173|AAT_PSEAE Aspartate aminotransferase OS=Pseudomonas aeruginosa (strain ATCC 15692 / PAO1 / 1C / PRS 101 / LMG 12228) GN=aspC PE=3 SV=2	1	3	3
	sp|P95454|RLME_PSEAE			>sp|P95454|RLME_PSEAE Ribosomal RNA large subunit methyltransferase E OS=Pseudomonas aeruginosa (strain ATCC 15692 / PAO1 / 1C / PRS 101 / LMG 12228) GN=rlmE PE=3 SV=2	1	1	1
	sp|Q51422|SYDND_PSEAE			>sp|Q51422|SYDND_PSEAE Aspartate--tRNA(Asp/Asn) ligase OS=Pseudomonas aeruginosa (strain ATCC 15692 / PAO1 / 1C / PRS 101 / LMG 12228) GN=aspS PE=1 SV=2	1	3	3
	sp|Q51561|RPOB_PSEAE			>sp|Q51561|RPOB_PSEAE DNA-directed RNA polymerase subunit beta OS=Pseudomonas aeruginosa (strain ATCC 15692 / PAO1 / 1C / PRS 101 / LMG 12228) GN=rpoB PE=3 SV=2	1	10	10
	sp|Q51567|SUCD_PSEAE			>sp|Q51567|SUCD_PSEAE Succinyl-CoA ligase [ADP-forming] subunit alpha OS=Pseudomonas aeruginosa (strain ATCC 15692 / PAO1 / 1C / PRS 101 / LMG 12228) GN=sucD PE=3 SV=2	1	5	5
	sp|Q59636|NDK_PSEAE			>sp|Q59636|NDK_PSEAE Nucleoside diphosphate kinase OS=Pseudomonas aeruginosa (strain ATCC 15692 / PAO1 / 1C / PRS 101 / LMG 12228) GN=ndk PE=3 SV=2	1	2	2
	sp|Q59637|ODP1_PSEAE			>sp|Q59637|ODP1_PSEAE Pyruvate dehydrogenase E1 component OS=Pseudomonas aeruginosa (strain ATCC 15692 / PAO1 / 1C / PRS 101 / LMG 12228) GN=aceE PE=3 SV=2	1	5	5
	sp|Q59638|ODP2_PSEAE			>sp|Q59638|ODP2_PSEAE Dihydrolipoyllysine-residue acetyltransferase component of pyruvate dehydrogenase complex OS=Pseudomonas aeruginosa (strain ATCC 15692 / PAO1 / 1C / PRS 101 / LMG 12228) GN=aceF PE=2 SV=2	1	8	8
	sp|Q9HT16|ATPF_PSEAE			>sp|Q9HT16|ATPF_PSEAE ATP synthase subunit b OS=Pseudomonas aeruginosa (strain ATCC 15692 / PAO1 / 1C / PRS 101 / LMG 12228) GN=atpF PE=3 SV=1	1	3	3
	sp|Q9HT18|ATPA_PSEAE			>sp|Q9HT18|ATPA_PSEAE ATP synthase subunit alpha OS=Pseudomonas aeruginosa (strain ATCC 15692 / PAO1 / 1C / PRS 101 / LMG 12228) GN=atpA PE=3 SV=1	1	10	10
	sp|Q9HT19|ATPG_PSEAE			>sp|Q9HT19|ATPG_PSEAE ATP synthase gamma chain OS=Pseudomonas aeruginosa (strain ATCC 15692 / PAO1 / 1C / PRS 101 / LMG 12228) GN=atpG PE=3 SV=1	1	1	1
	sp|Q9HT20|ATPB_PSEAE			>sp|Q9HT20|ATPB_PSEAE ATP synthase subunit beta OS=Pseudomonas aeruginosa (strain ATCC 15692 / PAO1 / 1C / PRS 101 / LMG 12228) GN=atpD PE=3 SV=1	1	8	8
	sp|Q9HT21|ATPE_PSEAE			>sp|Q9HT21|ATPE_PSEAE ATP synthase epsilon chain OS=Pseudomonas aeruginosa (strain ATCC 15692 / PAO1 / 1C / PRS 101 / LMG 12228) GN=atpC PE=3 SV=1	1	2	2
	sp|Q9HT95|ATSE4_PSEAE			>sp|Q9HT95|ATSE4_PSEAE Acetyltransferase PA5475 OS=Pseudomonas aeruginosa (strain ATCC 15692 / PAO1 / 1C / PRS 101 / LMG 12228) GN=PA5475 PE=3 SV=1	1	1	1
	sp|Q9HTN8|RL28_PSEAE			>sp|Q9HTN8|RL28_PSEAE 50S ribosomal protein L28 OS=Pseudomonas aeruginosa (strain ATCC 15692 / PAO1 / 1C / PRS 101 / LMG 12228) GN=rpmB PE=3 SV=1	1	1	1
	sp|Q9HTZ7|PCKA_PSEAE			>sp|Q9HTZ7|PCKA_PSEAE Phosphoenolpyruvate carboxykinase [ATP] OS=Pseudomonas aeruginosa (strain ATCC 15692 / PAO1 / 1C / PRS 101 / LMG 12228) GN=pckA PE=3 SV=1	1	1	1
	sp|Q9HU65|GLNA_PSEAE			>sp|Q9HU65|GLNA_PSEAE Glutamine synthetase OS=Pseudomonas aeruginosa (strain ATCC 15692 / PAO1 / 1C / PRS 101 / LMG 12228) GN=glnA PE=1 SV=1	1	1	1
	sp|Q9HUC8|SYR_PSEAE			>sp|Q9HUC8|SYR_PSEAE Arginine--tRNA ligase OS=Pseudomonas aeruginosa (strain ATCC 15692 / PAO1 / 1C / PRS 101 / LMG 12228) GN=argS PE=3 SV=1	1	2	2
	sp|Q9HUM0|HFQ_PSEAE			>sp|Q9HUM0|HFQ_PSEAE RNA-binding protein Hfq OS=Pseudomonas aeruginosa (strain ATCC 15692 / PAO1 / 1C / PRS 101 / LMG 12228) GN=hfq PE=1 SV=1	1	2	2
	sp|Q9HUM6|PURA_PSEAE			>sp|Q9HUM6|PURA_PSEAE Adenylosuccinate synthetase OS=Pseudomonas aeruginosa (strain ATCC 15692 / PAO1 / 1C / PRS 101 / LMG 12228) GN=purA PE=3 SV=1	1	3	3
	sp|Q9HUM9|RS6_PSEAE			>sp|Q9HUM9|RS6_PSEAE 30S ribosomal protein S6 OS=Pseudomonas aeruginosa (strain ATCC 15692 / PAO1 / 1C / PRS 101 / LMG 12228) GN=rpsF PE=3 SV=1	1	2	2
	sp|Q9HUN2|RL9_PSEAE			>sp|Q9HUN2|RL9_PSEAE 50S ribosomal protein L9 OS=Pseudomonas aeruginosa (strain ATCC 15692 / PAO1 / 1C / PRS 101 / LMG 12228) GN=rplI PE=3 SV=1	1	2	2
	sp|Q9HV43|DNAK_PSEAE			>sp|Q9HV43|DNAK_PSEAE Chaperone protein DnaK OS=Pseudomonas aeruginosa (strain ATCC 15692 / PAO1 / 1C / PRS 101 / LMG 12228) GN=dnaK PE=3 SV=1	1	9	9
	sp|Q9HV59|PNP_PSEAE			>sp|Q9HV59|PNP_PSEAE Polyribonucleotide nucleotidyltransferase OS=Pseudomonas aeruginosa (strain ATCC 15692 / PAO1 / 1C / PRS 101 / LMG 12228) GN=pnp PE=3 SV=1	1	6	6
	sp|Q9HVC4|RL25_PSEAE			>sp|Q9HVC4|RL25_PSEAE 50S ribosomal protein L25 OS=Pseudomonas aeruginosa (strain ATCC 15692 / PAO1 / 1C / PRS 101 / LMG 12228) GN=rplY PE=3 SV=1	1	5	5
	sp|Q9HVC5|KPRS_PSEAE			>sp|Q9HVC5|KPRS_PSEAE Ribose-phosphate pyrophosphokinase OS=Pseudomonas aeruginosa (strain ATCC 15692 / PAO1 / 1C / PRS 101 / LMG 12228) GN=prs PE=3 SV=1	1	1	1
	sp|Q9HVD1|PAGL_PSEAE			>sp|Q9HVD1|PAGL_PSEAE Lipid A deacylase PagL OS=Pseudomonas aeruginosa (strain ATCC 15692 / PAO1 / 1C / PRS 101 / LMG 12228) GN=pagL PE=1 SV=1	1	2	2
	sp|Q9HVI7|GLYA3_PSEAE			>sp|Q9HVI7|GLYA3_PSEAE Serine hydroxymethyltransferase 3 OS=Pseudomonas aeruginosa (strain ATCC 15692 / PAO1 / 1C / PRS 101 / LMG 12228) GN=glyA2 PE=3 SV=1	1	2	2
	sp|Q9HVL6|RL21_PSEAE			>sp|Q9HVL6|RL21_PSEAE 50S ribosomal protein L21 OS=Pseudomonas aeruginosa (strain ATCC 15692 / PAO1 / 1C / PRS 101 / LMG 12228) GN=rplU PE=3 SV=1	1	1	1
	sp|Q9HVM1|RS20_PSEAE			>sp|Q9HVM1|RS20_PSEAE 30S ribosomal protein S20 OS=Pseudomonas aeruginosa (strain ATCC 15692 / PAO1 / 1C / PRS 101 / LMG 12228) GN=rpsT PE=1 SV=3	1	1	1
	sp|Q9HVM4|SYI_PSEAE			>sp|Q9HVM4|SYI_PSEAE Isoleucine--tRNA ligase OS=Pseudomonas aeruginosa (strain ATCC 15692 / PAO1 / 1C / PRS 101 / LMG 12228) GN=ileS PE=3 SV=1	1	1	1
	sp|Q9HVN5|CLPB_PSEAE			>sp|Q9HVN5|CLPB_PSEAE Chaperone protein ClpB OS=Pseudomonas aeruginosa (strain ATCC 15692 / PAO1 / 1C / PRS 101 / LMG 12228) GN=clpB PE=3 SV=1	1	4	4
	sp|Q9HVT8|GATA_PSEAE			>sp|Q9HVT8|GATA_PSEAE Glutamyl-tRNA(Gln) amidotransferase subunit A OS=Pseudomonas aeruginosa (strain ATCC 15692 / PAO1 / 1C / PRS 101 / LMG 12228) GN=gatA PE=1 SV=1	1	1	1
	sp|Q9HVY3|RS9_PSEAE			>sp|Q9HVY3|RS9_PSEAE 30S ribosomal protein S9 OS=Pseudomonas aeruginosa (strain ATCC 15692 / PAO1 / 1C / PRS 101 / LMG 12228) GN=rpsI PE=3 SV=1	1	1	1
	sp|Q9HW04|ARGJ_PSEAE			>sp|Q9HW04|ARGJ_PSEAE Arginine biosynthesis bifunctional protein ArgJ OS=Pseudomonas aeruginosa (strain ATCC 15692 / PAO1 / 1C / PRS 101 / LMG 12228) GN=argJ PE=3 SV=1	1	1	1
	sp|Q9HW11|Y4395_PSEAE			>sp|Q9HW11|Y4395_PSEAE UPF0234 protein PA4395 OS=Pseudomonas aeruginosa (strain ATCC 15692 / PAO1 / 1C / PRS 101 / LMG 12228) GN=PA4395 PE=3 SV=1	1	1	1
	sp|Q9HWC5|RL11_PSEAE			>sp|Q9HWC5|RL11_PSEAE 50S ribosomal protein L11 OS=Pseudomonas aeruginosa (strain ATCC 15692 / PAO1 / 1C / PRS 101 / LMG 12228) GN=rplK PE=3 SV=1	1	2	2
	sp|Q9HWC6|RL1_PSEAE			>sp|Q9HWC6|RL1_PSEAE 50S ribosomal protein L1 OS=Pseudomonas aeruginosa (strain ATCC 15692 / PAO1 / 1C / PRS 101 / LMG 12228) GN=rplA PE=3 SV=1	1	1	1
	sp|Q9HWC7|RL10_PSEAE			>sp|Q9HWC7|RL10_PSEAE 50S ribosomal protein L10 OS=Pseudomonas aeruginosa (strain ATCC 15692 / PAO1 / 1C / PRS 101 / LMG 12228) GN=rplJ PE=3 SV=1	1	4	4
	sp|Q9HWC8|RL7_PSEAE			>sp|Q9HWC8|RL7_PSEAE 50S ribosomal protein L7/L12 OS=Pseudomonas aeruginosa (strain ATCC 15692 / PAO1 / 1C / PRS 101 / LMG 12228) GN=rplL PE=3 SV=1	1	1	1
	sp|Q9HWC9|RPOC_PSEAE			>sp|Q9HWC9|RPOC_PSEAE DNA-directed RNA polymerase subunit beta OS=Pseudomonas aeruginosa (strain ATCC 15692 / PAO1 / 1C / PRS 101 / LMG 12228) GN=rpoC PE=3 SV=1	1	10	10
	sp|Q9HWD1|RS7_PSEAE			>sp|Q9HWD1|RS7_PSEAE 30S ribosomal protein S7 OS=Pseudomonas aeruginosa (strain ATCC 15692 / PAO1 / 1C / PRS 101 / LMG 12228) GN=rpsG PE=3 SV=1	1	1	1
	sp|Q9HWD2|EFG1_PSEAE;sp|Q9I244|EFG2_PSEAE			>sp|Q9HWD2|EFG1_PSEAE Elongation factor G 1 OS=Pseudomonas aeruginosa (strain ATCC 15692 / PAO1 / 1C / PRS 101 / LMG 12228) GN=fusA PE=1 SV=1	2	14	14
	sp|Q9HWD5|RL3_PSEAE			>sp|Q9HWD5|RL3_PSEAE 50S ribosomal protein L3 OS=Pseudomonas aeruginosa (strain ATCC 15692 / PAO1 / 1C / PRS 101 / LMG 12228) GN=rplC PE=3 SV=1	1	2	2
	sp|Q9HWD8|RL2_PSEAE			>sp|Q9HWD8|RL2_PSEAE 50S ribosomal protein L2 OS=Pseudomonas aeruginosa (strain ATCC 15692 / PAO1 / 1C / PRS 101 / LMG 12228) GN=rplB PE=3 SV=1	1	4	4
	sp|Q9HWE0|RL22_PSEAE			>sp|Q9HWE0|RL22_PSEAE 50S ribosomal protein L22 OS=Pseudomonas aeruginosa (strain ATCC 15692 / PAO1 / 1C / PRS 101 / LMG 12228) GN=rplV PE=3 SV=1	1	2	2
	sp|Q9HWE1|RS3_PSEAE			>sp|Q9HWE1|RS3_PSEAE 30S ribosomal protein S3 OS=Pseudomonas aeruginosa (strain ATCC 15692 / PAO1 / 1C / PRS 101 / LMG 12228) GN=rpsC PE=3 SV=1	1	2	2
	sp|Q9HWE2|RL16_PSEAE			>sp|Q9HWE2|RL16_PSEAE 50S ribosomal protein L16 OS=Pseudomonas aeruginosa (strain ATCC 15692 / PAO1 / 1C / PRS 101 / LMG 12228) GN=rplP PE=3 SV=1	1	2	2
	sp|Q9HWE4|RS17_PSEAE			>sp|Q9HWE4|RS17_PSEAE 30S ribosomal protein S17 OS=Pseudomonas aeruginosa (strain ATCC 15692 / PAO1 / 1C / PRS 101 / LMG 12228) GN=rpsQ PE=3 SV=1	1	2	2
	sp|Q9HWE5|RL14_PSEAE			>sp|Q9HWE5|RL14_PSEAE 50S ribosomal protein L14 OS=Pseudomonas aeruginosa (strain ATCC 15692 / PAO1 / 1C / PRS 101 / LMG 12228) GN=rplN PE=3 SV=1	1	2	2
	sp|Q9HWE6|RL24_PSEAE			>sp|Q9HWE6|RL24_PSEAE 50S ribosomal protein L24 OS=Pseudomonas aeruginosa (strain ATCC 15692 / PAO1 / 1C / PRS 101 / LMG 12228) GN=rplX PE=3 SV=1	1	1	1
	sp|Q9HWE7|RL5_PSEAE			>sp|Q9HWE7|RL5_PSEAE 50S ribosomal protein L5 OS=Pseudomonas aeruginosa (strain ATCC 15692 / PAO1 / 1C / PRS 101 / LMG 12228) GN=rplE PE=3 SV=1	1	1	1
	sp|Q9HWE8|RS14_PSEAE			>sp|Q9HWE8|RS14_PSEAE 30S ribosomal protein S14 OS=Pseudomonas aeruginosa (strain ATCC 15692 / PAO1 / 1C / PRS 101 / LMG 12228) GN=rpsN PE=3 SV=1	1	2	2
	sp|Q9HWE9|RS8_PSEAE			>sp|Q9HWE9|RS8_PSEAE 30S ribosomal protein S8 OS=Pseudomonas aeruginosa (strain ATCC 15692 / PAO1 / 1C / PRS 101 / LMG 12228) GN=rpsH PE=3 SV=1	1	3	3
	sp|Q9HWF2|RS5_PSEAE			>sp|Q9HWF2|RS5_PSEAE 30S ribosomal protein S5 OS=Pseudomonas aeruginosa (strain ATCC 15692 / PAO1 / 1C / PRS 101 / LMG 12228) GN=rpsE PE=3 SV=1	1	2	2
	sp|Q9HWF3|RL30_PSEAE			>sp|Q9HWF3|RL30_PSEAE 50S ribosomal protein L30 OS=Pseudomonas aeruginosa (strain ATCC 15692 / PAO1 / 1C / PRS 101 / LMG 12228) GN=rpmD PE=1 SV=3	1	1	1
	sp|Q9HWF4|RL15_PSEAE			>sp|Q9HWF4|RL15_PSEAE 50S ribosomal protein L15 OS=Pseudomonas aeruginosa (strain ATCC 15692 / PAO1 / 1C / PRS 101 / LMG 12228) GN=rplO PE=3 SV=1	1	3	3
	sp|Q9HWF7|RS13_PSEAE			>sp|Q9HWF7|RS13_PSEAE 30S ribosomal protein S13 OS=Pseudomonas aeruginosa (strain ATCC 15692 / PAO1 / 1C / PRS 101 / LMG 12228) GN=rpsM PE=3 SV=1	1	1	1
	sp|Q9HWF9|BFR_PSEAE			>sp|Q9HWF9|BFR_PSEAE Bacterioferritin OS=Pseudomonas aeruginosa (strain ATCC 15692 / PAO1 / 1C / PRS 101 / LMG 12228) GN=bfr PE=1 SV=1	1	1	1
	sp|Q9HX33|SYL_PSEAE			>sp|Q9HX33|SYL_PSEAE Leucine--tRNA ligase OS=Pseudomonas aeruginosa (strain ATCC 15692 / PAO1 / 1C / PRS 101 / LMG 12228) GN=leuS PE=3 SV=1	1	1	1
	sp|Q9HXM6|GUAA_PSEAE			>sp|Q9HXM6|GUAA_PSEAE GMP synthase [glutamine-hydrolyzing] OS=Pseudomonas aeruginosa (strain ATCC 15692 / PAO1 / 1C / PRS 101 / LMG 12228) GN=guaA PE=3 SV=1	1	3	3
	sp|Q9HXQ2|RL19_PSEAE			>sp|Q9HXQ2|RL19_PSEAE 50S ribosomal protein L19 OS=Pseudomonas aeruginosa (strain ATCC 15692 / PAO1 / 1C / PRS 101 / LMG 12228) GN=rplS PE=3 SV=1	1	2	2
	sp|Q9HXV4|KAD_PSEAE			>sp|Q9HXV4|KAD_PSEAE Adenylate kinase OS=Pseudomonas aeruginosa (strain ATCC 15692 / PAO1 / 1C / PRS 101 / LMG 12228) GN=adk PE=3 SV=1	1	2	2
	sp|Q9HXZ4|PYRG_PSEAE			>sp|Q9HXZ4|PYRG_PSEAE CTP synthase OS=Pseudomonas aeruginosa (strain ATCC 15692 / PAO1 / 1C / PRS 101 / LMG 12228) GN=pyrG PE=3 SV=1	1	1	1
	sp|Q9HXZ5|ENO_PSEAE			>sp|Q9HXZ5|ENO_PSEAE Enolase OS=Pseudomonas aeruginosa (strain ATCC 15692 / PAO1 / 1C / PRS 101 / LMG 12228) GN=eno PE=3 SV=1	1	4	4
	sp|Q9HYR9|CLPP2_PSEAE			>sp|Q9HYR9|CLPP2_PSEAE ATP-dependent Clp protease proteolytic subunit 2 OS=Pseudomonas aeruginosa (strain ATCC 15692 / PAO1 / 1C / PRS 101 / LMG 12228) GN=clpP2 PE=3 SV=1	1	1	1
	sp|Q9HZ71|RS1_PSEAE			>sp|Q9HZ71|RS1_PSEAE 30S ribosomal protein S1 OS=Pseudomonas aeruginosa (strain ATCC 15692 / PAO1 / 1C / PRS 101 / LMG 12228) GN=rpsA PE=3 SV=1	1	6	6
	sp|Q9HZ76|WBPE_PSEAE			>sp|Q9HZ76|WBPE_PSEAE UDP-2-acetamido-2-deoxy-3-oxo-D-glucuronate aminotransferase OS=Pseudomonas aeruginosa (strain ATCC 15692 / PAO1 / 1C / PRS 101 / LMG 12228) GN=wbpE PE=1 SV=1	1	1	1
	sp|Q9HZE0|DHE2_PSEAE			>sp|Q9HZE0|DHE2_PSEAE NAD-specific glutamate dehydrogenase OS=Pseudomonas aeruginosa (strain ATCC 15692 / PAO1 / 1C / PRS 101 / LMG 12228) GN=gdhB PE=1 SV=1	1	9	9
	sp|Q9HZP5|ETFD_PSEAE			>sp|Q9HZP5|ETFD_PSEAE Electron transfer flavoprotein-ubiquinone oxidoreductase OS=Pseudomonas aeruginosa (strain ATCC 15692 / PAO1 / 1C / PRS 101 / LMG 12228) GN=PA2953 PE=1 SV=1	1	1	1
	sp|Q9HZP6|ETFB_PSEAE			>sp|Q9HZP6|ETFB_PSEAE Electron transfer flavoprotein subunit beta OS=Pseudomonas aeruginosa (strain ATCC 15692 / PAO1 / 1C / PRS 101 / LMG 12228) GN=etfB PE=3 SV=1	1	2	2
	sp|Q9HZZ2|EFP_PSEAE			>sp|Q9HZZ2|EFP_PSEAE Elongation factor P OS=Pseudomonas aeruginosa (strain ATCC 15692 / PAO1 / 1C / PRS 101 / LMG 12228) GN=efp PE=1 SV=1	1	3	3
	sp|Q9I0A2|RL20_PSEAE			>sp|Q9I0A2|RL20_PSEAE 50S ribosomal protein L20 OS=Pseudomonas aeruginosa (strain ATCC 15692 / PAO1 / 1C / PRS 101 / LMG 12228) GN=rplT PE=3 SV=1	1	1	1
	sp|Q9I0K4|ACEA_PSEAE			>sp|Q9I0K4|ACEA_PSEAE Isocitrate lyase OS=Pseudomonas aeruginosa (strain ATCC 15692 / PAO1 / 1C / PRS 101 / LMG 12228) GN=PA2634 PE=1 SV=1	1	3	3
	sp|Q9I2A8|ATOB_PSEAE			>sp|Q9I2A8|ATOB_PSEAE Acetyl-CoA acetyltransferase OS=Pseudomonas aeruginosa (strain ATCC 15692 / PAO1 / 1C / PRS 101 / LMG 12228) GN=atoB PE=3 SV=1	1	4	4
	sp|Q9I2U8|SYQ_PSEAE			>sp|Q9I2U8|SYQ_PSEAE Glutamine--tRNA ligase OS=Pseudomonas aeruginosa (strain ATCC 15692 / PAO1 / 1C / PRS 101 / LMG 12228) GN=glnS PE=1 SV=1	1	1	1
	sp|Q9I2V5|ACNB_PSEAE			>sp|Q9I2V5|ACNB_PSEAE Aconitate hydratase B OS=Pseudomonas aeruginosa (strain ATCC 15692 / PAO1 / 1C / PRS 101 / LMG 12228) GN=acnB PE=3 SV=1	1	13	13
	sp|Q9I3D1|DLDH2_PSEAE			>sp|Q9I3D1|DLDH2_PSEAE Dihydrolipoyl dehydrogenase OS=Pseudomonas aeruginosa (strain ATCC 15692 / PAO1 / 1C / PRS 101 / LMG 12228) GN=lpdG PE=3 SV=1	1	7	7
	sp|Q9I3F5|ACNA_PSEAE			>sp|Q9I3F5|ACNA_PSEAE Aconitate hydratase A OS=Pseudomonas aeruginosa (strain ATCC 15692 / PAO1 / 1C / PRS 101 / LMG 12228) GN=acnA PE=3 SV=1	1	5	5
	sp|Q9I4W3|DAPA_PSEAE			>sp|Q9I4W3|DAPA_PSEAE 4-hydroxy-tetrahydrodipicolinate synthase OS=Pseudomonas aeruginosa (strain ATCC 15692 / PAO1 / 1C / PRS 101 / LMG 12228) GN=dapA PE=1 SV=1	1	1	1
	sp|Q9I4Z4|PAL_PSEAE			>sp|Q9I4Z4|PAL_PSEAE Peptidoglycan-associated lipoprotein OS=Pseudomonas aeruginosa (strain ATCC 15692 / PAO1 / 1C / PRS 101 / LMG 12228) GN=pal PE=3 SV=1	1	1	1
	sp|Q9I558|ACSA1_PSEAE			>sp|Q9I558|ACSA1_PSEAE Acetyl-coenzyme A synthetase 1 OS=Pseudomonas aeruginosa (strain ATCC 15692 / PAO1 / 1C / PRS 101 / LMG 12228) GN=acsA1 PE=3 SV=1	1	2	2
	sp|Q9I576|HPPD_PSEAE			>sp|Q9I576|HPPD_PSEAE 4-hydroxyphenylpyruvate dioxygenase OS=Pseudomonas aeruginosa (strain ATCC 15692 / PAO1 / 1C / PRS 101 / LMG 12228) GN=hpd PE=3 SV=1	1	3	3
	sp|Q9I589|CBPD_PSEAE			>sp|Q9I589|CBPD_PSEAE Chitin-binding protein CbpD OS=Pseudomonas aeruginosa (strain ATCC 15692 / PAO1 / 1C / PRS 101 / LMG 12228) GN=cbpD PE=1 SV=1	1	2	2
	sp|Q9I5V8|RS21_PSEAE			>sp|Q9I5V8|RS21_PSEAE 30S ribosomal protein S21 OS=Pseudomonas aeruginosa (strain ATCC 15692 / PAO1 / 1C / PRS 101 / LMG 12228) GN=rpsU PE=1 SV=3	1	1	1
	sp|Q9I5Y1|ALF_PSEAE			>sp|Q9I5Y1|ALF_PSEAE Fructose-bisphosphate aldolase OS=Pseudomonas aeruginosa (strain ATCC 15692 / PAO1 / 1C / PRS 101 / LMG 12228) GN=fba PE=3 SV=1	1	3	3
	sp|Q9I5Z0|METK_PSEAE			>sp|Q9I5Z0|METK_PSEAE S-adenosylmethionine synthase OS=Pseudomonas aeruginosa (strain ATCC 15692 / PAO1 / 1C / PRS 101 / LMG 12228) GN=metK PE=3 SV=1	1	2	2
	sp|Q9I685|SAHH_PSEAE			>sp|Q9I685|SAHH_PSEAE Adenosylhomocysteinase OS=Pseudomonas aeruginosa (strain ATCC 15692 / PAO1 / 1C / PRS 101 / LMG 12228) GN=ahcY PE=3 SV=1	1	7	7
	sp|Q9I6G2|Y329_PSEAE			>sp|Q9I6G2|Y329_PSEAE UPF0339 protein PA0329 OS=Pseudomonas aeruginosa (strain ATCC 15692 / PAO1 / 1C / PRS 101 / LMG 12228) GN=PA0329 PE=3 SV=1	1	1	1
	sp|Q9I6M4|DAVT_PSEAE			>sp|Q9I6M4|DAVT_PSEAE 5-aminovalerate aminotransferase DavT OS=Pseudomonas aeruginosa (strain ATCC 15692 / PAO1 / 1C / PRS 101 / LMG 12228) GN=davT PE=1 SV=1	1	7	7
	sp|Q9I6M5|DAVD_PSEAE			>sp|Q9I6M5|DAVD_PSEAE Glutarate-semialdehyde dehydrogenase DavD OS=Pseudomonas aeruginosa (strain ATCC 15692 / PAO1 / 1C / PRS 101 / LMG 12228) GN=davD PE=1 SV=1	1	2	2
	sp|Q9I747|HCP1_PSEAE			>sp|Q9I747|HCP1_PSEAE Protein hcp1 OS=Pseudomonas aeruginosa (strain ATCC 15692 / PAO1 / 1C / PRS 101 / LMG 12228) GN=hcp1 PE=1 SV=1	1	2	2
	sp|Q9I7C2|GYRB_PSEAE			>sp|Q9I7C2|GYRB_PSEAE DNA gyrase subunit B OS=Pseudomonas aeruginosa (strain ATCC 15692 / PAO1 / 1C / PRS 101 / LMG 12228) GN=gyrB PE=3 SV=1	1	1	1
	sp|Q9I7C4|DPO3B_PSEAE			>sp|Q9I7C4|DPO3B_PSEAE DNA polymerase III subunit beta OS=Pseudomonas aeruginosa (strain ATCC 15692 / PAO1 / 1C / PRS 101 / LMG 12228) GN=dnaN PE=3 SV=1	1	1	1
	sp|Q9LCT3|SECA_PSEAE			>sp|Q9LCT3|SECA_PSEAE Protein translocase subunit SecA OS=Pseudomonas aeruginosa (strain ATCC 15692 / PAO1 / 1C / PRS 101 / LMG 12228) GN=secA PE=3 SV=1	1	1	1
	sp|Q9S646|PPK_PSEAE			>sp|Q9S646|PPK_PSEAE Polyphosphate kinase OS=Pseudomonas aeruginosa (strain ATCC 15692 / PAO1 / 1C / PRS 101 / LMG 12228) GN=ppk PE=3 SV=1	1	1	1
	sp|Q9X2T1|THIO_PSEAE			>sp|Q9X2T1|THIO_PSEAE Thioredoxin OS=Pseudomonas aeruginosa (strain ATCC 15692 / PAO1 / 1C / PRS 101 / LMG 12228) GN=trxA PE=3 SV=1	1	3	3
	tr|G3XCT6|G3XCT6_PSEAE			>tr|G3XCT6|G3XCT6_PSEAE Probable two-component sensor OS=Pseudomonas aeruginosa (strain ATCC 15692 / PAO1 / 1C / PRS 101 / LMG 12228) GN=PA1458 PE=4 SV=1	1	1	1
	tr|G3XD11|G3XD11_PSEAE			>tr|G3XD11|G3XD11_PSEAE PhoP/Q and low Mg2+ inducible outer membrane protein H1 OS=Pseudomonas aeruginosa (strain ATCC 15692 / PAO1 / 1C / PRS 101 / LMG 12228) GN=oprH PE=4 SV=1	1	3	3
	tr|Q9HTD1|Q9HTD1_PSEAE			>tr|Q9HTD1|Q9HTD1_PSEAE Probable transcarboxylase subunit OS=Pseudomonas aeruginosa (strain ATCC 15692 / PAO1 / 1C / PRS 101 / LMG 12228) GN=PA5435 PE=4 SV=1	1	6	6
	tr|Q9HTD9|Q9HTD9_PSEAE			>tr|Q9HTD9|Q9HTD9_PSEAE Alcohol dehydrogenase OS=Pseudomonas aeruginosa (strain ATCC 15692 / PAO1 / 1C / PRS 101 / LMG 12228) GN=adhA PE=1 SV=1	1	5	5
	tr|Q9HTP2|Q9HTP2_PSEAE			>tr|Q9HTP2|Q9HTP2_PSEAE Probable aldehyde dehydrogenase OS=Pseudomonas aeruginosa (strain ATCC 15692 / PAO1 / 1C / PRS 101 / LMG 12228) GN=PA5312 PE=3 SV=1	1	3	3
	tr|Q9HU11|Q9HU11_PSEAE			>tr|Q9HU11|Q9HU11_PSEAE Uncharacterized protein OS=Pseudomonas aeruginosa (strain ATCC 15692 / PAO1 / 1C / PRS 101 / LMG 12228) GN=PA5178 PE=4 SV=1	1	7	7
	tr|Q9HUC3|Q9HUC3_PSEAE			>tr|Q9HUC3|Q9HUC3_PSEAE Polyhydroxyalkanoate synthesis protein PhaF OS=Pseudomonas aeruginosa (strain ATCC 15692 / PAO1 / 1C / PRS 101 / LMG 12228) GN=phaF PE=4 SV=1	1	2	2
	tr|Q9HUD3|Q9HUD3_PSEAE			>tr|Q9HUD3|Q9HUD3_PSEAE Malic enzyme OS=Pseudomonas aeruginosa (strain ATCC 15692 / PAO1 / 1C / PRS 101 / LMG 12228) GN=PA5046 PE=3 SV=1	1	1	1
	tr|Q9HUG0|Q9HUG0_PSEAE			>tr|Q9HUG0|Q9HUG0_PSEAE Probable carbamoyl transferase OS=Pseudomonas aeruginosa (strain ATCC 15692 / PAO1 / 1C / PRS 101 / LMG 12228) GN=PA5005 PE=4 SV=1	1	1	1
	tr|Q9HV54|Q9HV54_PSEAE			>tr|Q9HV54|Q9HV54_PSEAE Transcription termination/antitermination protein NusA OS=Pseudomonas aeruginosa (strain ATCC 15692 / PAO1 / 1C / PRS 101 / LMG 12228) GN=nusA PE=3 SV=1	1	1	1
	tr|Q9HVJ1|Q9HVJ1_PSEAE			>tr|Q9HVJ1|Q9HVJ1_PSEAE Probable ATP-binding component of ABC transporter OS=Pseudomonas aeruginosa (strain ATCC 15692 / PAO1 / 1C / PRS 101 / LMG 12228) GN=PA4595 PE=3 SV=1	1	4	4
	tr|Q9HVV5|Q9HVV5_PSEAE			>tr|Q9HVV5|Q9HVV5_PSEAE Uncharacterized protein OS=Pseudomonas aeruginosa (strain ATCC 15692 / PAO1 / 1C / PRS 101 / LMG 12228) GN=PA4463 PE=4 SV=1	1	2	2
	tr|Q9HVY4|Q9HVY4_PSEAE			>tr|Q9HVY4|Q9HVY4_PSEAE Ubiquinol-cytochrome c reductase iron-sulfur subunit OS=Pseudomonas aeruginosa (strain ATCC 15692 / PAO1 / 1C / PRS 101 / LMG 12228) GN=PA4431 PE=4 SV=1	1	1	1
	tr|Q9HVY6|Q9HVY6_PSEAE			>tr|Q9HVY6|Q9HVY6_PSEAE Probable cytochrome c1 OS=Pseudomonas aeruginosa (strain ATCC 15692 / PAO1 / 1C / PRS 101 / LMG 12228) GN=PA4429 PE=4 SV=1	1	1	1
	tr|Q9HW32|Q9HW32_PSEAE			>tr|Q9HW32|Q9HW32_PSEAE Insulin-cleaving metalloproteinase outer membrane protein OS=Pseudomonas aeruginosa (strain ATCC 15692 / PAO1 / 1C / PRS 101 / LMG 12228) GN=icmP PE=4 SV=1	1	1	1
	tr|Q9HW49|Q9HW49_PSEAE			>tr|Q9HW49|Q9HW49_PSEAE Uncharacterized protein OS=Pseudomonas aeruginosa (strain ATCC 15692 / PAO1 / 1C / PRS 101 / LMG 12228) GN=PA4352 PE=4 SV=1	1	3	3
	tr|Q9HW72|Q9HW72_PSEAE			>tr|Q9HW72|Q9HW72_PSEAE Pyruvate kinase OS=Pseudomonas aeruginosa (strain ATCC 15692 / PAO1 / 1C / PRS 101 / LMG 12228) GN=pykA PE=3 SV=1	1	2	2
	tr|Q9HW86|Q9HW86_PSEAE			>tr|Q9HW86|Q9HW86_PSEAE MvaT OS=Pseudomonas aeruginosa (strain ATCC 15692 / PAO1 / 1C / PRS 101 / LMG 12228) GN=mvaT PE=1 SV=1	1	1	1
	tr|Q9HWG9|Q9HWG9_PSEAE			>tr|Q9HWG9|Q9HWG9_PSEAE Flavin-containing monooxygenase OS=Pseudomonas aeruginosa (strain ATCC 15692 / PAO1 / 1C / PRS 101 / LMG 12228) GN=phzS PE=1 SV=1	1	2	2
	tr|Q9HWH2|Q9HWH2_PSEAE			>tr|Q9HWH2|Q9HWH2_PSEAE Probable phenazine-specific methyltransferase OS=Pseudomonas aeruginosa (strain ATCC 15692 / PAO1 / 1C / PRS 101 / LMG 12228) GN=phzM PE=1 SV=1	1	1	1
	tr|Q9HWQ0|Q9HWQ0_PSEAE			>tr|Q9HWQ0|Q9HWQ0_PSEAE Probable iron-sulfur protein OS=Pseudomonas aeruginosa (strain ATCC 15692 / PAO1 / 1C / PRS 101 / LMG 12228) GN=PA4131 PE=4 SV=1	1	2	2
	tr|Q9HWV0|Q9HWV0_PSEAE			>tr|Q9HWV0|Q9HWV0_PSEAE Probable nonribosomal peptide synthetase OS=Pseudomonas aeruginosa (strain ATCC 15692 / PAO1 / 1C / PRS 101 / LMG 12228) GN=PA4078 PE=4 SV=1	1	2	2
	tr|Q9HWW1|Q9HWW1_PSEAE			>tr|Q9HWW1|Q9HWW1_PSEAE Outer membrane protein OprG OS=Pseudomonas aeruginosa (strain ATCC 15692 / PAO1 / 1C / PRS 101 / LMG 12228) GN=oprG PE=1 SV=1	1	4	4
	tr|Q9HX05|Q9HX05_PSEAE;tr|Q9I2C4|Q9I2C4_PSEAE			>tr|Q9HX05|Q9HX05_PSEAE Probable aldehyde dehydrogenase OS=Pseudomonas aeruginosa (strain ATCC 15692 / PAO1 / 1C / PRS 101 / LMG 12228) GN=PA4022 PE=3 SV=1	2	3	3
	tr|Q9HX76|Q9HX76_PSEAE			>tr|Q9HX76|Q9HX76_PSEAE Probable DNA binding protein OS=Pseudomonas aeruginosa (strain ATCC 15692 / PAO1 / 1C / PRS 101 / LMG 12228) GN=PA3940 PE=3 SV=1	1	2	2
	tr|Q9HXI3|Q9HXI3_PSEAE			>tr|Q9HXI3|Q9HXI3_PSEAE Uncharacterized protein OS=Pseudomonas aeruginosa (strain ATCC 15692 / PAO1 / 1C / PRS 101 / LMG 12228) GN=PA3819 PE=4 SV=1	1	1	1
	tr|Q9HXR8|Q9HXR8_PSEAE			>tr|Q9HXR8|Q9HXR8_PSEAE Probable FMN oxidoreductase OS=Pseudomonas aeruginosa (strain ATCC 15692 / PAO1 / 1C / PRS 101 / LMG 12228) GN=PA3723 PE=4 SV=1	1	1	1
	tr|Q9HXU9|Q9HXU9_PSEAE			>tr|Q9HXU9|Q9HXU9_PSEAE Uncharacterized protein OS=Pseudomonas aeruginosa (strain ATCC 15692 / PAO1 / 1C / PRS 101 / LMG 12228) GN=PA3691 PE=4 SV=1	1	2	2
	tr|Q9HY01|Q9HY01_PSEAE			>tr|Q9HY01|Q9HY01_PSEAE S-(hydroxymethyl)glutathione dehydrogenase OS=Pseudomonas aeruginosa (strain ATCC 15692 / PAO1 / 1C / PRS 101 / LMG 12228) GN=adhC PE=3 SV=1	1	1	1
	tr|Q9HY12|Q9HY12_PSEAE			>tr|Q9HY12|Q9HY12_PSEAE Uncharacterized protein OS=Pseudomonas aeruginosa (strain ATCC 15692 / PAO1 / 1C / PRS 101 / LMG 12228) GN=PA3614 PE=4 SV=1	1	1	1
	tr|Q9HY13|Q9HY13_PSEAE			>tr|Q9HY13|Q9HY13_PSEAE Uncharacterized protein OS=Pseudomonas aeruginosa (strain ATCC 15692 / PAO1 / 1C / PRS 101 / LMG 12228) GN=PA3613 PE=4 SV=1	1	4	4
	tr|Q9HY77|Q9HY77_PSEAE			>tr|Q9HY77|Q9HY77_PSEAE Glutaredoxin OS=Pseudomonas aeruginosa (strain ATCC 15692 / PAO1 / 1C / PRS 101 / LMG 12228) GN=PA3533 PE=3 SV=1	1	3	3
	tr|Q9HY79|Q9HY79_PSEAE			>tr|Q9HY79|Q9HY79_PSEAE Ferroxidase OS=Pseudomonas aeruginosa (strain ATCC 15692 / PAO1 / 1C / PRS 101 / LMG 12228) GN=bfrB PE=1 SV=1	1	1	1
	tr|Q9HY81|Q9HY81_PSEAE			>tr|Q9HY81|Q9HY81_PSEAE Probable peroxidase OS=Pseudomonas aeruginosa (strain ATCC 15692 / PAO1 / 1C / PRS 101 / LMG 12228) GN=PA3529 PE=4 SV=1	1	2	2
	tr|Q9HYT5|Q9HYT5_PSEAE			>tr|Q9HYT5|Q9HYT5_PSEAE Uncharacterized protein OS=Pseudomonas aeruginosa (strain ATCC 15692 / PAO1 / 1C / PRS 101 / LMG 12228) GN=PA3309 PE=4 SV=1	1	8	8
	tr|Q9HZ48|Q9HZ48_PSEAE			>tr|Q9HZ48|Q9HZ48_PSEAE Probable binding protein component of ABC sugar transporter OS=Pseudomonas aeruginosa (strain ATCC 15692 / PAO1 / 1C / PRS 101 / LMG 12228) GN=PA3190 PE=4 SV=1	1	1	1
	tr|Q9HZK4|Q9HZK4_PSEAE			>tr|Q9HZK4|Q9HZK4_PSEAE Glyceraldehyde-3-phosphate dehydrogenase OS=Pseudomonas aeruginosa (strain ATCC 15692 / PAO1 / 1C / PRS 101 / LMG 12228) GN=PA3001 PE=3 SV=1	1	3	3
	tr|Q9I028|Q9I028_PSEAE			>tr|Q9I028|Q9I028_PSEAE Probable acyl-CoA dehydrogenase OS=Pseudomonas aeruginosa (strain ATCC 15692 / PAO1 / 1C / PRS 101 / LMG 12228) GN=PA2815 PE=4 SV=1	1	1	1
	tr|Q9I0H1|Q9I0H1_PSEAE			>tr|Q9I0H1|Q9I0H1_PSEAE Uncharacterized protein OS=Pseudomonas aeruginosa (strain ATCC 15692 / PAO1 / 1C / PRS 101 / LMG 12228) GN=PA2667 PE=4 SV=1	1	1	1
	tr|Q9I0L4|Q9I0L4_PSEAE			>tr|Q9I0L4|Q9I0L4_PSEAE Isocitrate dehydrogenase OS=Pseudomonas aeruginosa (strain ATCC 15692 / PAO1 / 1C / PRS 101 / LMG 12228) GN=idh PE=4 SV=1	1	6	6
	tr|Q9I0L5|Q9I0L5_PSEAE			>tr|Q9I0L5|Q9I0L5_PSEAE Isocitrate dehydrogenase [NADP] OS=Pseudomonas aeruginosa (strain ATCC 15692 / PAO1 / 1C / PRS 101 / LMG 12228) GN=icd PE=3 SV=1	1	8	8
	tr|Q9I0T0|Q9I0T0_PSEAE			>tr|Q9I0T0|Q9I0T0_PSEAE Probable short-chain dehydrogenase OS=Pseudomonas aeruginosa (strain ATCC 15692 / PAO1 / 1C / PRS 101 / LMG 12228) GN=PA2554 PE=3 SV=1	1	1	1
	tr|Q9I0T1|Q9I0T1_PSEAE			>tr|Q9I0T1|Q9I0T1_PSEAE Probable acyl-CoA thiolase OS=Pseudomonas aeruginosa (strain ATCC 15692 / PAO1 / 1C / PRS 101 / LMG 12228) GN=PA2553 PE=3 SV=1	1	5	5
	tr|Q9I0T2|Q9I0T2_PSEAE			>tr|Q9I0T2|Q9I0T2_PSEAE Probable acyl-CoA dehydrogenase OS=Pseudomonas aeruginosa (strain ATCC 15692 / PAO1 / 1C / PRS 101 / LMG 12228) GN=PA2552 PE=3 SV=1	1	1	1
	tr|Q9I1E7|Q9I1E7_PSEAE			>tr|Q9I1E7|Q9I1E7_PSEAE Alkyl hydroperoxide reductase AhpD OS=Pseudomonas aeruginosa (strain ATCC 15692 / PAO1 / 1C / PRS 101 / LMG 12228) GN=PA2331 PE=4 SV=1	1	1	1
	tr|Q9I1H5|Q9I1H5_PSEAE			>tr|Q9I1H5|Q9I1H5_PSEAE Chitinase OS=Pseudomonas aeruginosa (strain ATCC 15692 / PAO1 / 1C / PRS 101 / LMG 12228) GN=chiC PE=3 SV=1	1	4	4
	tr|Q9I1N7|Q9I1N7_PSEAE			>tr|Q9I1N7|Q9I1N7_PSEAE PslB OS=Pseudomonas aeruginosa (strain ATCC 15692 / PAO1 / 1C / PRS 101 / LMG 12228) GN=pslB PE=3 SV=1	1	1	1
	tr|Q9I246|Q9I246_PSEAE			>tr|Q9I246|Q9I246_PSEAE Probable carbamoyl transferase OS=Pseudomonas aeruginosa (strain ATCC 15692 / PAO1 / 1C / PRS 101 / LMG 12228) GN=PA2069 PE=4 SV=1	1	4	4
	tr|Q9I2U9|Q9I2U9_PSEAE			>tr|Q9I2U9|Q9I2U9_PSEAE Peptidyl-prolyl cis-trans isomerase OS=Pseudomonas aeruginosa (strain ATCC 15692 / PAO1 / 1C / PRS 101 / LMG 12228) GN=ppiB PE=3 SV=1	1	4	4
	tr|Q9I2V3|Q9I2V3_PSEAE			>tr|Q9I2V3|Q9I2V3_PSEAE Uncharacterized protein OS=Pseudomonas aeruginosa (strain ATCC 15692 / PAO1 / 1C / PRS 101 / LMG 12228) GN=PA1789 PE=1 SV=1	1	1	1
	tr|Q9I2W9|Q9I2W9_PSEAE			>tr|Q9I2W9|Q9I2W9_PSEAE Phosphoenolpyruvate synthase OS=Pseudomonas aeruginosa (strain ATCC 15692 / PAO1 / 1C / PRS 101 / LMG 12228) GN=ppsA PE=3 SV=1	1	6	6
	tr|Q9I2Z1|Q9I2Z1_PSEAE			>tr|Q9I2Z1|Q9I2Z1_PSEAE Uncharacterized protein OS=Pseudomonas aeruginosa (strain ATCC 15692 / PAO1 / 1C / PRS 101 / LMG 12228) GN=PA1746 PE=4 SV=1	1	1	1
	tr|Q9I3D3|Q9I3D3_PSEAE			>tr|Q9I3D3|Q9I3D3_PSEAE 2-oxoglutarate dehydrogenase (E1 subunit) OS=Pseudomonas aeruginosa (strain ATCC 15692 / PAO1 / 1C / PRS 101 / LMG 12228) GN=sucA PE=4 SV=1	1	6	6
	tr|Q9I3D4|Q9I3D4_PSEAE			>tr|Q9I3D4|Q9I3D4_PSEAE Succinate dehydrogenase (B subunit) OS=Pseudomonas aeruginosa (strain ATCC 15692 / PAO1 / 1C / PRS 101 / LMG 12228) GN=sdhB PE=4 SV=1	1	3	3
	tr|Q9I3D5|Q9I3D5_PSEAE			>tr|Q9I3D5|Q9I3D5_PSEAE Succinate dehydrogenase flavoprotein subunit OS=Pseudomonas aeruginosa (strain ATCC 15692 / PAO1 / 1C / PRS 101 / LMG 12228) GN=sdhA PE=3 SV=1	1	6	6
	tr|Q9I3G2|Q9I3G2_PSEAE			>tr|Q9I3G2|Q9I3G2_PSEAE Cbb3-type cytochrome c oxidase subunit OS=Pseudomonas aeruginosa (strain ATCC 15692 / PAO1 / 1C / PRS 101 / LMG 12228) GN=ccoP2 PE=3 SV=1	1	1	1
	tr|Q9I4I1|Q9I4I1_PSEAE			>tr|Q9I4I1|Q9I4I1_PSEAE Ribonucleoside-diphosphate reductase OS=Pseudomonas aeruginosa (strain ATCC 15692 / PAO1 / 1C / PRS 101 / LMG 12228) GN=nrdA PE=3 SV=1	1	3	3
	tr|Q9I4S1|Q9I4S1_PSEAE			>tr|Q9I4S1|Q9I4S1_PSEAE Uncharacterized protein OS=Pseudomonas aeruginosa (strain ATCC 15692 / PAO1 / 1C / PRS 101 / LMG 12228) GN=PA1053 PE=4 SV=1	1	2	2
	tr|Q9I4W5|Q9I4W5_PSEAE			>tr|Q9I4W5|Q9I4W5_PSEAE Bacterioferritin comigratory protein OS=Pseudomonas aeruginosa (strain ATCC 15692 / PAO1 / 1C / PRS 101 / LMG 12228) GN=bcp PE=4 SV=1	1	1	1
	tr|Q9I4X1|Q9I4X1_PSEAE			>tr|Q9I4X1|Q9I4X1_PSEAE PqsC OS=Pseudomonas aeruginosa (strain ATCC 15692 / PAO1 / 1C / PRS 101 / LMG 12228) GN=pqsC PE=4 SV=1	1	2	2
	tr|Q9I4X2|Q9I4X2_PSEAE			>tr|Q9I4X2|Q9I4X2_PSEAE PqsB OS=Pseudomonas aeruginosa (strain ATCC 15692 / PAO1 / 1C / PRS 101 / LMG 12228) GN=pqsB PE=4 SV=1	1	1	1
	tr|Q9I5F6|Q9I5F6_PSEAE			>tr|Q9I5F6|Q9I5F6_PSEAE Bifunctional protein PutA OS=Pseudomonas aeruginosa (strain ATCC 15692 / PAO1 / 1C / PRS 101 / LMG 12228) GN=putA PE=3 SV=1	1	1	1
	tr|Q9I5I5|Q9I5I5_PSEAE			>tr|Q9I5I5|Q9I5I5_PSEAE Probable enoyl-CoA hydratase/isomerase OS=Pseudomonas aeruginosa (strain ATCC 15692 / PAO1 / 1C / PRS 101 / LMG 12228) GN=PA0744 PE=4 SV=1	1	1	1
	tr|Q9I5U9|Q9I5U9_PSEAE			>tr|Q9I5U9|Q9I5U9_PSEAE Uncharacterized protein OS=Pseudomonas aeruginosa (strain ATCC 15692 / PAO1 / 1C / PRS 101 / LMG 12228) GN=PA0588 PE=4 SV=1	1	12	12
	tr|Q9I5Y8|Q9I5Y8_PSEAE			>tr|Q9I5Y8|Q9I5Y8_PSEAE Transketolase OS=Pseudomonas aeruginosa (strain ATCC 15692 / PAO1 / 1C / PRS 101 / LMG 12228) GN=tktA PE=1 SV=1	1	2	2
	tr|Q9I612|Q9I612_PSEAE			>tr|Q9I612|Q9I612_PSEAE Probable acyl-CoA dehydrogenase OS=Pseudomonas aeruginosa (strain ATCC 15692 / PAO1 / 1C / PRS 101 / LMG 12228) GN=PA0506 PE=3 SV=1	1	1	1
	tr|Q9I659|Q9I659_PSEAE			>tr|Q9I659|Q9I659_PSEAE Probable ClpA/B protease ATP binding subunit OS=Pseudomonas aeruginosa (strain ATCC 15692 / PAO1 / 1C / PRS 101 / LMG 12228) GN=PA0459 PE=4 SV=1	1	4	3
	tr|Q9I671|Q9I671_PSEAE			>tr|Q9I671|Q9I671_PSEAE Glutaryl-CoA dehydrogenase OS=Pseudomonas aeruginosa (strain ATCC 15692 / PAO1 / 1C / PRS 101 / LMG 12228) GN=gcdH PE=3 SV=1	1	2	2
	tr|Q9I687|Q9I687_PSEAE			>tr|Q9I687|Q9I687_PSEAE Methylenetetrahydrofolate reductase OS=Pseudomonas aeruginosa (strain ATCC 15692 / PAO1 / 1C / PRS 101 / LMG 12228) GN=metF PE=3 SV=1	1	1	1
	tr|Q9I6H5|Q9I6H5_PSEAE			>tr|Q9I6H5|Q9I6H5_PSEAE D-3-phosphoglycerate dehydrogenase OS=Pseudomonas aeruginosa (strain ATCC 15692 / PAO1 / 1C / PRS 101 / LMG 12228) GN=serA PE=3 SV=1	1	3	3
	tr|Q9I6Z3|Q9I6Z3_PSEAE			>tr|Q9I6Z3|Q9I6Z3_PSEAE Alkyl hydroperoxide reductase subunit C OS=Pseudomonas aeruginosa (strain ATCC 15692 / PAO1 / 1C / PRS 101 / LMG 12228) GN=ahpC PE=4 SV=1	1	7	7
	tr|Q9I762|Q9I762_PSEAE			>tr|Q9I762|Q9I762_PSEAE Uncharacterized protein OS=Pseudomonas aeruginosa (strain ATCC 15692 / PAO1 / 1C / PRS 101 / LMG 12228) GN=PA0070 PE=4 SV=1	1	2	2
	tr|Q9I765|Q9I765_PSEAE			>tr|Q9I765|Q9I765_PSEAE Oligopeptidase A OS=Pseudomonas aeruginosa (strain ATCC 15692 / PAO1 / 1C / PRS 101 / LMG 12228) GN=prlC PE=3 SV=1	1	1	1

## Sheet: 1-2 proteinGroups C4HSL-1
Protein IDs	Majority protein IDs	Peptide counts (all)	Peptide counts (razor+unique)	Peptide counts (unique)	Fasta headers	Number of proteins	Peptides	Razor + unique peptides	Unique peptides	Sequence coverage [%]	Unique + razor sequence coverage [%]	Unique sequence coverage [%]	Mol. weight [kDa]	Sequence length	Sequence lengths	Q-value	Score	Intensity	MS/MS Count	Only identified by site	Reverse	Potential contaminant	id	Peptide IDs	Peptide is razor	Mod. peptide IDs	Evidence IDs	MS/MS IDs	Best MS/MS	Oxidation (M) site IDs	Oxidation (M) site positions
CON__P00761	CON__P00761	4	4	4	>P00761 SWISS-PROT:P00761|TRYP_PIG Trypsin - Sus scrofa (Pig).	1	4	4	4	25.1	25.1	25.1	24.409	231	231	0	36.25	782010000	26			+	0	269;349;404;606	True;True;True;True	278;279;361;417;627	487;488;489;490;491;492;493;494;638;639;741;1195;1196;1197	575;576;577;578;579;580;581;582;583;584;585;586;587;588;589;590;591;592;593;594;595;762;763;874;1465;1466;1467;1468	588;762;874;1467	0	94
CON__P01045-1	CON__P01045-1	1	1	1	>P01045-1 SWISS-PROT:P01045-1 (Bos taurus) Isoform HMW of Kininogen-2 precursor	1	1	1	1	2.7	2.7	2.7	68.709	619	619	0.0098039	5.4096	4713900	1			+	1	374	TRUE	387	689	817	817
CON__P02533;CON__Q6IFX2;CON__Q04695;CON__Q9QWL7;CON__P19012;CON__A2A4G1;CON__P08727;CON__P19001;CON__Q61782;CON__P05784;CON__P35900;CON__Q9D312;CON__Q8N1A0;CON__Q14525;CON__Q9UE12;CON__Q15323;CON__A2A5Y0;CON__Q92764;CON__Q14532;CON__A2AB72;CON__Q497I4;CON__O76015;CON__O76013;CON__Q7Z3Y9;CON__O76014;CON__REFSEQ:XP_986630	CON__P02533;CON__Q6IFX2	15;8;7;7;6;6;5;4;3;2;2;2;1;1;1;1;1;1;1;1;1;1;1;1;1;1	6;3;1;2;0;0;1;0;1;0;0;0;0;0;0;0;0;0;0;0;0;0;0;0;0;0	6;3;1;2;0;0;1;0;1;0;0;0;0;0;0;0;0;0;0;0;0;0;0;0;0;0	>P02533 SWISS-PROT:P02533 Tax_Id=9606 Gene_Symbol=KRT14 Keratin, type I cytoskeletal 14;>Q6IFX2 SWISS-PROT:Q6IFX2 Tax_Id=10090 Gene_Symbol=Krt42 Keratin, type I cytoskeletal 42	26	15	6	6	34.7	19.3	19.3	51.621	472	472;452;432;433;456;456;400;403;93;423;424;431;295;404;416;416;416;425;448;453;455;456;467;468;471;476	0	76.494	136810000	12			+	2	48;71;84;102;152;217;297;321;331;340;367;435;587;639;675	False;True;False;True;True;True;False;False;False;False;True;True;False;False;False	49;73;87;106;160;226;308;333;343;352;379;450;608;661;697;698	89;90;133;134;157;158;194;195;292;293;399;551;552;591;592;609;623;675;676;677;795;1163;1164;1259;1326;1327;1328;1329	105;106;107;108;158;159;185;186;187;188;232;233;348;349;476;661;662;709;710;711;712;730;746;800;801;802;803;939;1429;1430;1542;1543;1620;1621;1622;1623;1624;1625;1626;1627	105;159;188;232;348;476;662;710;730;746;801;939;1429;1543;1626	1;2;3	119;212;272
CON__P02538;CON__P48668;CON__P04259;CON__P05787;CON__Q8VED5;CON__O95678;CON__H-INV:HIT000016045;CON__H-INV:HIT000292931	CON__P02538;CON__P48668;CON__P04259	15;13;12;5;5;4;2;2	7;5;4;1;0;0;0;1	5;3;2;0;0;0;0;0	>P02538 SWISS-PROT:P02538 Tax_Id=9606 Gene_Symbol=KRT6A Keratin, type II cytoskeletal 6A;>P48668 SWISS-PROT:P48668 Tax_Id=9606 Gene_Symbol=KRT6C Keratin, type II cytoskeletal 6C;>P04259 SWISS-PROT:P04259 Tax_Id=9606 Gene_Symbol=KRT6B Keratin, type II cytos	8	15	7	5	25.7	14.4	10.8	60.044	564	564;564;564;483;531;551;99;443	0	59.299	96536000	12			+	3	16;40;78;154;160;169;212;454;458;460;495;519;562;693;699	True;True;False;True;False;False;True;True;False;False;False;True;True;False;False	16;41;80;162;168;178;221;469;473;475;513;538;583;716;722	26;27;75;145;146;296;304;305;321;391;867;868;881;882;883;884;888;960;961;1014;1117;1118;1363;1364;1385;1386	30;31;32;87;88;170;171;172;173;352;360;361;362;378;466;1050;1051;1064;1065;1066;1067;1068;1069;1070;1074;1163;1164;1228;1371;1372;1669;1670;1671;1672;1707;1708	30;88;172;352;362;378;466;1050;1066;1074;1164;1228;1371;1670;1708	4;5	242;452
CON__P04264	CON__P04264	26	26	15	>P04264 SWISS-PROT:P04264 Tax_Id=9606 Gene_Symbol=KRT1 Keratin, type II cytoskeletal 1	1	26	26	15	36.8	36.8	23.9	66.017	644	644	0	323.31	8039800000	127			+	4	19;128;133;171;194;247;319;327;375;400;401;455;458;468;491;521;529;532;538;539;579;582;583;687;699;700	True;True;True;True;True;True;True;True;True;True;True;True;True;True;True;True;True;True;True;True;True;True;True;True;True;True	19;133;138;139;180;203;256;331;339;388;413;414;470;473;484;485;486;509;540;548;551;557;558;600;603;604;710;722;723	31;32;236;237;238;239;250;251;252;253;323;324;325;362;363;449;450;588;601;602;690;691;692;693;734;735;736;737;869;870;871;872;881;882;883;884;904;905;906;907;908;909;910;950;951;952;953;1016;1017;1030;1031;1038;1039;1049;1050;1051;1052;1145;1146;1152;1153;1154;1155;1156;1157;1349;1350;1385;1386;1387;1388	36;37;38;39;279;280;281;282;283;284;297;298;299;300;301;302;303;304;305;381;382;383;384;385;386;429;430;431;432;531;532;533;534;535;536;537;705;721;722;818;819;820;821;822;823;867;868;869;870;1052;1053;1054;1055;1064;1065;1066;1067;1068;1069;1070;1090;1091;1092;1093;1094;1095;1096;1097;1098;1099;1100;1101;1102;1103;1104;1149;1150;1151;1152;1153;1154;1230;1231;1232;1245;1246;1253;1254;1255;1256;12…	37;282;303;382;429;532;705;721;822;867;869;1052;1066;1093;1153;1231;1245;1257;1274;1276;1406;1419;1421;1653;1708;1711	6;7;8	259;262;469
CON__P08779;CON__Q9Z2K1;CON__Q3ZAW8	CON__P08779	19;8;8	16;6;6	10;2;2	>P08779 SWISS-PROT:P08779 Tax_Id=9606 Gene_Symbol=KRT16 Keratin, type I cytoskeletal 16	3	19	16	10	39.3	34.5	23.9	51.267	473	473;469;474	0	170.95	405350000	33			+	5	48;70;84;103;151;216;266;279;297;321;331;340;502;503;574;587;639;675;703	True;True;True;True;True;True;True;True;True;False;False;True;True;True;True;True;True;False;True	49;72;87;107;159;225;275;290;308;333;343;352;520;521;595;608;661;697;698;726	89;90;131;132;157;158;196;197;290;291;397;398;483;516;551;552;591;592;609;623;975;976;977;978;1136;1137;1163;1164;1259;1326;1327;1328;1329;1393;1394	105;106;107;108;156;157;185;186;187;188;234;235;346;347;472;473;474;475;571;619;661;662;709;710;711;712;730;746;1182;1183;1184;1185;1393;1394;1429;1430;1542;1543;1620;1621;1622;1623;1624;1625;1626;1627;1723;1724	105;157;188;234;346;475;571;619;662;710;730;746;1182;1183;1393;1429;1543;1626;1724	3;9;10;11	121;274;289;296
CON__P13645;CON__P02535-1;CON__Q148H6;CON__Q7Z3Y7;CON__Q7Z3Z0;CON__Q7Z3Y8;CON__Q2M2I5	CON__P13645	24;10;3;3;2;2;2	24;10;3;3;2;2;2	19;6;1;1;1;1;0	>P13645 SWISS-PROT:P13645 Tax_Id=9606 Gene_Symbol=KRT10 Keratin, type I cytoskeletal 10	7	24	24	19	31.7	31.7	26	59.51	593	593;570;464;486;450;459;525	0	323.31	5354200000	94			+	6	49;101;148;219;271;298;321;331;339;364;450;499;500;501;509;512;513;531;536;550;551;640;675;704	True;True;True;True;True;True;True;True;True;True;True;True;True;True;True;True;True;True;True;True;True;True;True;True	50;105;156;228;281;309;333;343;351;376;465;517;518;519;528;531;532;550;555;570;571;662;697;698;727	91;92;192;193;284;285;401;402;497;498;553;554;555;556;591;592;609;621;622;668;669;670;671;861;862;967;968;969;970;971;972;973;974;993;994;999;1000;1001;1002;1003;1036;1037;1046;1047;1070;1071;1072;1073;1074;1075;1076;1260;1261;1326;1327;1328;1329;1395;1396	109;110;111;112;113;114;228;229;230;231;337;338;339;340;478;479;480;598;599;663;664;665;666;667;668;669;709;710;711;712;730;742;743;744;745;793;794;795;796;1044;1045;1170;1171;1172;1173;1174;1175;1176;1177;1178;1179;1180;1181;1203;1204;1210;1211;1212;1213;1214;1251;1252;1266;1267;1268;1269;1299;1300;1301;1302;1303;1304;1305;1306;1307;1308;1309;1310;1311;1312;1544;1545;1546;1547;1620;1621;1622;162…	113;231;339;478;599;666;710;730;745;795;1045;1171;1174;1178;1203;1210;1214;1251;1269;1300;1311;1545;1626;1726	3	150
CON__P13647	CON__P13647	15	11	3	>P13647 SWISS-PROT:P13647 Tax_Id=9606 Gene_Symbol=KRT5 Keratin, type II cytoskeletal 5	1	15	11	3	24.1	19.2	5.1	62.378	590	590	0	99.426	334770000	27			+	7	77;160;169;300;323;458;460;467;495;516;592;607;693;699;701	True;False;True;True;True;False;False;True;True;True;True;True;True;False;True	79;168;178;311;335;473;475;482;483;513;535;613;628;629;716;722;724	143;144;304;305;321;559;560;595;596;881;882;883;884;888;900;901;902;903;960;961;1010;1171;1172;1198;1199;1200;1201;1363;1364;1385;1386;1389;1390	168;169;360;361;362;378;672;673;715;716;1064;1065;1066;1067;1068;1069;1070;1074;1086;1087;1088;1089;1163;1164;1223;1440;1441;1469;1470;1471;1472;1473;1669;1670;1671;1672;1707;1708;1716;1717	169;362;378;673;715;1066;1074;1089;1164;1223;1441;1471;1670;1708;1717	12;13;14;15	247;274;297;303
CON__P35527;CON__Q99456	CON__P35527	20;1	19;0	19;0	>P35527 SWISS-PROT:P35527 Tax_Id=9606 Gene_Symbol=KRT9 Keratin, type I cytoskeletal 9	2	20	19	19	42.2	41.1	41.1	62.129	623	623;494	0	248.46	2191400000	72			+	8	142;163;177;195;197;198;233;272;293;294;331;436;488;489;504;522;554;578;581;662	True;True;True;True;True;True;True;True;True;True;False;True;True;True;True;True;True;True;True;True	149;171;172;186;204;206;207;242;282;283;304;305;343;451;506;507;522;523;541;574;599;602;684	270;271;272;273;309;310;311;312;334;364;367;368;369;370;426;427;428;429;499;500;501;502;503;504;505;506;542;543;544;545;546;547;609;796;797;944;945;946;947;979;980;981;1018;1019;1100;1101;1143;1144;1148;1149;1150;1151;1303;1304	323;324;325;326;366;367;368;369;397;433;436;437;438;439;440;441;442;507;508;509;510;511;600;601;602;603;604;605;606;607;651;652;653;654;655;656;657;730;940;941;942;943;1139;1140;1141;1142;1143;1144;1145;1146;1186;1187;1188;1189;1233;1234;1347;1348;1349;1350;1400;1401;1402;1403;1404;1412;1413;1414;1415;1592;1593;1594;1595	324;367;397;433;437;439;510;600;652;654;730;941;1142;1146;1186;1233;1347;1403;1415;1592	16;17;18;19	157;245;269;326
CON__P35908;CON__Q7Z794;CON__Q9R0H5;CON__Q6NXH9;CON__P19013	CON__P35908	24;3;2;2;2	21;1;1;1;2	15;0;0;0;0	>P35908 SWISS-PROT:P35908 Tax_Id=9606 Gene_Symbol=KRT2 Keratin, type II cytoskeletal 2 epidermal	5	24	21	15	38.8	35.7	26.4	65.865	645	645;578;524;539;594	0	203.27	890480000	58			+	9	78;129;134;160;171;190;196;220;247;320;395;456;460;475;530;540;560;561;588;589;610;699;702;708	True;True;True;True;False;True;True;True;False;True;True;True;True;True;True;True;True;True;True;True;True;False;True;True	80;134;140;141;168;180;199;205;229;256;332;408;471;475;493;549;559;581;582;609;610;632;722;725;731	145;146;240;241;254;255;256;257;304;305;323;324;325;353;354;365;366;403;404;449;450;589;590;724;725;873;874;875;888;922;923;1032;1033;1034;1035;1053;1114;1115;1116;1165;1166;1167;1205;1206;1385;1386;1391;1392;1402;1403	170;171;172;173;285;286;306;307;308;309;360;361;362;381;382;383;384;385;386;416;417;418;419;434;435;481;482;531;532;533;534;535;536;537;706;707;708;857;858;1056;1057;1058;1074;1117;1118;1247;1248;1249;1250;1278;1366;1367;1368;1369;1370;1431;1432;1433;1434;1435;1436;1477;1478;1707;1708;1718;1719;1720;1721;1722;1734;1735;1736;1737	172;286;306;362;382;418;435;481;532;707;858;1056;1074;1117;1249;1278;1368;1370;1431;1432;1478;1708;1718;1735	20;21;22	263;300;473
CON__Q14CN4-1;CON__Q6IME9;CON__Q3SY84;CON__Q7RTS7;CON__Q32MB2	CON__Q14CN4-1;CON__Q6IME9;CON__Q3SY84;CON__Q7RTS7;CON__Q32MB2	2;2;2;2;2	1;1;1;1;1	1;1;1;1;1	>Q14CN4-1 SWISS-PROT:Q14CN4-1 Tax_Id=9606 Gene_Symbol=KRT72 Isoform 1 of Keratin, type II cytoskeletal 72;>Q6IME9 TREMBL:Q6IME9 Tax_Id=10090 Gene_Symbol=Krt72 Type-II keratin Kb35;>Q3SY84 SWISS-PROT:Q3SY84 Tax_Id=9606 Gene_Symbol=KRT71 Keratin, type II cyt	5	2	1	1	3.7	2.3	2.3	55.877	511	511;520;523;529;540	0	19.186	7395500	2			+	10	160;170	False;True	168;179	304;305;322	360;361;362;379;380	362;380
CON__Q1A7A4	CON__Q1A7A4	1	1	1	>Q1A7A4 TREMBL:Q1A7A4 (Bos taurus) similar to complement component C5	1	1	1	1	0.4	0.4	0.4	188.74	1677	1677	0.0097087	5.4017	69571000	2			+	11	691	TRUE	714	1359;1360	1665;1666	1665
CON__Q9C075	CON__Q9C075	1	1	1	>Q9C075 SWISS-PROT:Q9C075 Tax_Id=9606 Gene_Symbol=KRT23 Keratin, type I cytoskeletal 23	1	1	1	1	5.7	5.7	5.7	48.131	422	422	0.0095238	5.3386	2035200	0			+	12	429	TRUE	444	786	930	930	23	1
CON__Streptavidin	CON__Streptavidin	4	4	4	>Streptavidin (S.avidinii)	1	4	4	4	43.1	43.1	43.1	16.622	160	160	0	58.31	166440000	137			+	13	286;442;553;698	True;True;True;True	297;457;573;721	529;530;531;806;807;808;809;810;811;812;813;814;815;816;817;818;819;820;821;822;823;824;825;826;827;828;829;830;831;832;833;834;835;836;837;838;839;840;841;842;843;844;845;846;847;848;1078;1079;1080;1081;1082;1083;1084;1085;1086;1087;1088;1089;1090;1091;1092;1093;1094;1095;1096;1097;1098;1099;1371;1372;1373;1374;1375;1376;1377;1378;1379;1380;1381;1382;1383;1384	634;635;636;637;638;955;956;957;958;959;960;961;962;963;964;965;966;967;968;969;970;971;972;973;974;975;976;977;978;979;980;981;982;983;984;985;986;987;988;989;990;991;992;993;994;995;996;997;998;999;1000;1001;1002;1003;1004;1005;1006;1007;1008;1009;1010;1011;1012;1013;1014;1015;1016;1017;1018;1019;1020;1021;1022;1023;1024;1025;1026;1027;1028;1029;1030;1315;1316;1317;1318;1319;1320;1321;1322;1323…	637;1017;1325;1695
REV__tr|Q9I1U4|Q9I1U4_PSEAE	REV__tr|Q9I1U4|Q9I1U4_PSEAE	1	1	1	>tr|Q9I1U4|Q9I1U4_PSEAE Uncharacterized protein OS=Pseudomonas aeruginosa (strain ATCC 15692 / PAO1 / 1C / PRS 101 / LMG 12228) GN=PA2171 PE=4 SV=1	1	1	1	1	0	0	0	18.098	156	156	0.0049505	5.4516	17705000	2		+		14	493	TRUE	511	956;957	1159;1160	1159
REV__tr|Q9I4Y7|Q9I4Y7_PSEAE	REV__tr|Q9I4Y7|Q9I4Y7_PSEAE	1	1	1	>tr|Q9I4Y7|Q9I4Y7_PSEAE Uncharacterized protein OS=Pseudomonas aeruginosa (strain ATCC 15692 / PAO1 / 1C / PRS 101 / LMG 12228) GN=PA0982 PE=4 SV=1	1	1	1	1	0	0	0	19.904	182	182	0.009901	5.4384	19992000	1		+		15	573	TRUE	594	1135	1392	1392
sp|G3XD76|DAPD_PSEAE	sp|G3XD76|DAPD_PSEAE	1	1	1	>sp|G3XD76|DAPD_PSEAE 2,3,4,5-tetrahydropyridine-2,6-dicarboxylate N-succinyltransferase OS=Pseudomonas aeruginosa (strain ATCC 15692 / PAO1 / 1C / PRS 101 / LMG 12228) GN=dapD PE=1 SV=1	1	1	1	1	3.5	3.5	3.5	35.973	344	344	0.0096618	5.3772	1951900	1				16	368	TRUE	380	678	804	804
sp|G3XD94|UGND_PSEAE	sp|G3XD94|UGND_PSEAE	2	2	2	>sp|G3XD94|UGND_PSEAE UDP-N-acetyl-D-glucosamine 6-dehydrogenase OS=Pseudomonas aeruginosa (strain ATCC 15692 / PAO1 / 1C / PRS 101 / LMG 12228) GN=wbpA PE=1 SV=1	1	2	2	2	4.8	4.8	4.8	48.155	436	436	0	10.789	11013000	2				17	95;665	True;True	99;687	182;1308	217;1601	217;1601
sp|O50175|ASTB_PSEAE	sp|O50175|ASTB_PSEAE	1	1	1	>sp|O50175|ASTB_PSEAE N-succinylarginine dihydrolase OS=Pseudomonas aeruginosa (strain ATCC 15692 / PAO1 / 1C / PRS 101 / LMG 12228) GN=astB PE=3 SV=1	1	1	1	1	2.5	2.5	2.5	48.874	448	448	0	7.8806	1235400	2				18	566	TRUE	587	1125;1126	1382;1383	1382
sp|O52759|RS4_PSEAE	sp|O52759|RS4_PSEAE	4	4	4	>sp|O52759|RS4_PSEAE 30S ribosomal protein S4 OS=Pseudomonas aeruginosa (strain ATCC 15692 / PAO1 / 1C / PRS 101 / LMG 12228) GN=rpsD PE=3 SV=2	1	4	4	4	14.1	14.1	14.1	23.277	206	206	0	29.273	44518000	6				19	218;335;402;619	True;True;True;True	227;347;415;641	400;614;615;738;739;1223	477;735;736;871;872;1498	477;735;871;1498
sp|O52760|RPOA_PSEAE	sp|O52760|RPOA_PSEAE	6	6	6	>sp|O52760|RPOA_PSEAE DNA-directed RNA polymerase subunit alpha OS=Pseudomonas aeruginosa (strain ATCC 15692 / PAO1 / 1C / PRS 101 / LMG 12228) GN=rpoA PE=3 SV=2	1	6	6	6	18.9	18.9	18.9	36.649	333	333	0	47.645	80389000	11				20	24;188;234;303;396;673	True;True;True;True;True;True	24;197;243;314;409;695	39;40;351;430;431;565;566;726;727;1321;1322	46;47;414;512;513;678;679;859;860;1615;1616	46;414;513;678;860;1616
sp|O52761|RL17_PSEAE	sp|O52761|RL17_PSEAE	2	2	2	>sp|O52761|RL17_PSEAE 50S ribosomal protein L17 OS=Pseudomonas aeruginosa (strain ATCC 15692 / PAO1 / 1C / PRS 101 / LMG 12228) GN=rplQ PE=3 SV=1	1	2	2	2	13.2	13.2	13.2	14.504	129	129	0	10.834	15493000	3				21	345;602	True;True	357;623	632;1187;1188	756;1456;1457	756;1456
sp|O52762|CATA_PSEAE	sp|O52762|CATA_PSEAE	9	9	9	>sp|O52762|CATA_PSEAE Catalase OS=Pseudomonas aeruginosa (strain ATCC 15692 / PAO1 / 1C / PRS 101 / LMG 12228) GN=katA PE=1 SV=1	1	9	9	9	20.1	20.1	20.1	55.588	482	482	0	106.82	144260000	19				22	119;175;224;342;346;355;408;440;714	True;True;True;True;True;True;True;True;True	124;184;233;354;358;367;421;455;737	222;331;410;411;626;627;633;634;649;650;651;652;747;748;803;804;1413;1414	263;394;488;489;749;750;757;758;773;774;775;776;885;886;887;952;953;1749;1750	263;394;488;750;758;773;885;952;1749
sp|O54439|ACP1_PSEAE	sp|O54439|ACP1_PSEAE	1	1	1	>sp|O54439|ACP1_PSEAE Acyl carrier protein 1 OS=Pseudomonas aeruginosa (strain ATCC 15692 / PAO1 / 1C / PRS 101 / LMG 12228) GN=acpP1 PE=3 SV=4	1	1	1	1	11.5	11.5	11.5	8.7406	78	78	0	5.4672	35756000	1				23	306	TRUE	318	571	684	684
sp|O69753|PHZB1_PSEAE;sp|Q9S508|PHZB2_PSEAE	sp|O69753|PHZB1_PSEAE;sp|Q9S508|PHZB2_PSEAE	4;3	4;3	4;3	>sp|O69753|PHZB1_PSEAE Phenazine biosynthesis protein PhzB 1 OS=Pseudomonas aeruginosa (strain ATCC 15692 / PAO1 / 1C / PRS 101 / LMG 12228) GN=phzB1 PE=3 SV=1;>sp|Q9S508|PHZB2_PSEAE Phenazine biosynthesis protein PhzB 2 OS=Pseudomonas aeruginosa (strain A	2	4	4	4	28.4	28.4	28.4	18.888	162	162;162	0	36.505	49988000	8				24	60;140;322;482	True;True;True;True	61;147;334;500	113;114;267;268;593;594;933;934	138;139;320;321;713;714;1128;1129	138;321;713;1128
sp|O69754|PHZF_PSEAE	sp|O69754|PHZF_PSEAE	1	1	1	>sp|O69754|PHZF_PSEAE Trans-2,3-dihydro-3-hydroxyanthranilate isomerase OS=Pseudomonas aeruginosa (strain ATCC 15692 / PAO1 / 1C / PRS 101 / LMG 12228) GN=phzF1 PE=3 SV=2	1	1	1	1	4	4	4	30.342	278	278	0	7.9798	1474400	2				25	480	TRUE	498	930;931	1125;1126	1126
sp|O82850|RS2_PSEAE	sp|O82850|RS2_PSEAE	2	2	2	>sp|O82850|RS2_PSEAE 30S ribosomal protein S2 OS=Pseudomonas aeruginosa (strain ATCC 15692 / PAO1 / 1C / PRS 101 / LMG 12228) GN=rpsB PE=3 SV=2	1	2	2	2	7.3	7.3	7.3	27.336	246	246	0	12.24	25404000	4				26	265;690	True;True	274;713	481;482;1357;1358	569;570;1663;1664	570;1663
sp|O86428|ILVE_PSEAE	sp|O86428|ILVE_PSEAE	2	2	2	>sp|O86428|ILVE_PSEAE Branched-chain-amino-acid aminotransferase OS=Pseudomonas aeruginosa (strain ATCC 15692 / PAO1 / 1C / PRS 101 / LMG 12228) GN=ilvE PE=1 SV=2	1	2	2	2	8.1	8.1	8.1	34.084	307	307	0	13.227	15873000	3				27	99;472	True;True	103;490	188;189;917	224;225;1111	225;1111
sp|O87125|CHEB1_PSEAE	sp|O87125|CHEB1_PSEAE	1	1	1	>sp|O87125|CHEB1_PSEAE Chemotaxis response regulator protein-glutamate methylesterase of group 1 operon OS=Pseudomonas aeruginosa (strain ATCC 15692 / PAO1 / 1C / PRS 101 / LMG 12228) GN=cheB1 PE=1 SV=2	1	1	1	1	4.6	4.6	4.6	39.004	368	368	0	8.6024	706380	2				28	622	TRUE	644	1228;1229	1503;1504	1503
sp|P04739|FMPO_PSEAE	sp|P04739|FMPO_PSEAE	3	3	3	>sp|P04739|FMPO_PSEAE Fimbrial protein OS=Pseudomonas aeruginosa (strain ATCC 15692 / PAO1 / 1C / PRS 101 / LMG 12228) GN=pilA PE=1 SV=1	1	3	3	3	29.5	29.5	29.5	15.512	149	149	0	45.462	57544000	5				29	262;511;595	True;True;True	271;530;616	475;997;998;1176;1177	563;1208;1209;1445;1446	563;1209;1446
sp|P05384|DBHB_PSEAE	sp|P05384|DBHB_PSEAE	2	2	2	>sp|P05384|DBHB_PSEAE DNA-binding protein HU-beta OS=Pseudomonas aeruginosa (strain ATCC 15692 / PAO1 / 1C / PRS 101 / LMG 12228) GN=hupB PE=1 SV=3	1	2	2	2	32.2	32.2	32.2	9.0865	90	90	0	35.662	60759000	10				30	47;514	True;True	48;533	87;88;1004;1005;1006;1007	101;102;103;104;1215;1216;1217;1218;1219;1220	104;1220
sp|P08308|OTCC_PSEAE	sp|P08308|OTCC_PSEAE	10	10	10	>sp|P08308|OTCC_PSEAE Ornithine carbamoyltransferase, catabolic OS=Pseudomonas aeruginosa (strain ATCC 15692 / PAO1 / 1C / PRS 101 / LMG 12228) GN=arcB PE=1 SV=3	1	10	10	10	26.5	26.5	26.5	38.108	336	336	0	71.636	347970000	25				31	146;270;407;439;451;461;469;486;711;717	True;True;True;True;True;True;True;True;True;True	153;154;280;420;454;466;476;487;504;734;740	279;280;281;495;496;745;746;801;802;863;864;889;890;911;912;940;941;1407;1408;1418;1419	332;333;334;596;597;881;882;883;884;948;949;950;951;1046;1047;1075;1076;1105;1106;1135;1136;1741;1742;1754;1755	334;596;883;949;1047;1076;1106;1136;1742;1755	24	258
sp|P09591|EFTU_PSEAE	sp|P09591|EFTU_PSEAE	11	11	11	>sp|P09591|EFTU_PSEAE Elongation factor Tu OS=Pseudomonas aeruginosa (strain ATCC 15692 / PAO1 / 1C / PRS 101 / LMG 12228) GN=tufA PE=1 SV=2	1	11	11	11	34	34	34	43.369	397	397	0	129.1	1222000000	31				32	29;34;107;204;232;238;411;457;593;594;664	True;True;True;True;True;True;True;True;True;True;True	29;35;111;213;241;247;424;472;614;615;686	49;50;61;62;201;202;379;380;381;424;425;436;753;754;876;877;878;879;880;1173;1174;1175;1306;1307	57;58;71;72;73;74;239;240;451;452;453;454;505;506;518;893;894;895;896;1059;1060;1061;1062;1063;1442;1443;1444;1597;1598;1599;1600	57;73;240;451;505;518;894;1060;1442;1443;1600
sp|P11221|OPRI_PSEAE	sp|P11221|OPRI_PSEAE	3	3	3	>sp|P11221|OPRI_PSEAE Major outer membrane lipoprotein OS=Pseudomonas aeruginosa (strain ATCC 15692 / PAO1 / 1C / PRS 101 / LMG 12228) GN=oprI PE=3 SV=1	1	3	3	3	25.3	25.3	25.3	8.8348	83	83	0	22.554	13629000	12				33	12;310;406	True;True;True	12;322;419	21;576;577;743;744	25;689;690;691;692;693;694;876;877;878;879;880	25;694;879
sp|P13794|PORF_PSEAE	sp|P13794|PORF_PSEAE	11	11	11	>sp|P13794|PORF_PSEAE Outer membrane porin F OS=Pseudomonas aeruginosa (strain ATCC 15692 / PAO1 / 1C / PRS 101 / LMG 12228) GN=oprF PE=1 SV=1	1	11	11	11	33.4	33.4	33.4	37.639	350	350	0	111.51	688320000	33				34	82;131;459;498;505;508;611;651;652;706;721	True;True;True;True;True;True;True;True;True;True;True	85;136;474;516;524;527;633;673;674;729;744	153;154;244;245;246;247;885;886;887;966;982;983;989;990;991;992;1207;1208;1281;1282;1283;1284;1285;1399;1400;1425	180;181;182;289;290;291;292;293;294;1071;1072;1073;1169;1190;1191;1197;1198;1199;1200;1201;1202;1479;1480;1481;1482;1567;1568;1569;1570;1571;1572;1731;1732;1763	180;293;1071;1169;1190;1202;1481;1567;1572;1732;1763
sp|P13981|ARCA_PSEAE	sp|P13981|ARCA_PSEAE	13	13	13	>sp|P13981|ARCA_PSEAE Arginine deiminase OS=Pseudomonas aeruginosa (strain ATCC 15692 / PAO1 / 1C / PRS 101 / LMG 12228) GN=arcA PE=1 SV=2	1	13	13	13	27.5	27.5	27.5	46.435	418	418	0	133.25	785430000	34				35	37;113;118;301;312;313;473;484;487;507;559;637;681	True;True;True;True;True;True;True;True;True;True;True;True;True	38;117;123;312;324;325;491;502;505;526;580;659;704	66;67;211;212;220;221;561;562;579;580;581;582;918;919;936;937;942;943;987;988;1112;1113;1255;1256;1338;1339	78;79;249;250;251;259;260;261;262;674;675;696;697;698;699;1112;1113;1114;1131;1132;1137;1138;1195;1196;1362;1363;1364;1365;1536;1537;1538;1539;1637;1638;1639	78;251;262;675;697;698;1114;1131;1138;1195;1363;1536;1637
sp|P13982|ARCC_PSEAE	sp|P13982|ARCC_PSEAE	1	1	1	>sp|P13982|ARCC_PSEAE Carbamate kinase OS=Pseudomonas aeruginosa (strain ATCC 15692 / PAO1 / 1C / PRS 101 / LMG 12228) GN=arcC PE=3 SV=1	1	1	1	1	3.9	3.9	3.9	33.08	310	310	0	8.0093	20762000	4				36	39	TRUE	40	71;72;73;74	83;84;85;86	84
sp|P14165|CISY_PSEAE	sp|P14165|CISY_PSEAE	2	2	2	>sp|P14165|CISY_PSEAE Citrate synthase OS=Pseudomonas aeruginosa (strain ATCC 15692 / PAO1 / 1C / PRS 101 / LMG 12228) GN=gltA PE=3 SV=2	1	2	2	2	5.4	5.4	5.4	47.694	428	428	0	17.218	19340000	4				37	424;433	True;True	438;448	774;775;791;792	918;919;935;936	919;935
sp|P15276|ALGP_PSEAE	sp|P15276|ALGP_PSEAE	1	1	1	>sp|P15276|ALGP_PSEAE Transcriptional regulatory protein AlgP OS=Pseudomonas aeruginosa (strain ATCC 15692 / PAO1 / 1C / PRS 101 / LMG 12228) GN=algP PE=4 SV=2	1	1	1	1	2	2	2	34.49	352	352	0.0094787	5.3371	9107800	1				38	599	TRUE	620	1184	1453	1453
sp|P26276|ALGC_PSEAE	sp|P26276|ALGC_PSEAE	1	1	1	>sp|P26276|ALGC_PSEAE Phosphomannomutase/phosphoglucomutase OS=Pseudomonas aeruginosa (strain ATCC 15692 / PAO1 / 1C / PRS 101 / LMG 12228) GN=algC PE=1 SV=4	1	1	1	1	1.9	1.9	1.9	50.295	463	463	0	8.3386	2166400	1				39	157	TRUE	165	300	356	356
sp|P29363|THRC_PSEAE	sp|P29363|THRC_PSEAE	1	1	1	>sp|P29363|THRC_PSEAE Threonine synthase OS=Pseudomonas aeruginosa (strain ATCC 15692 / PAO1 / 1C / PRS 101 / LMG 12228) GN=thrC PE=3 SV=3	1	1	1	1	2.1	2.1	2.1	51.795	469	469	0	6.1499	2786700	2				40	90	TRUE	94	173;174	205;206	205
sp|P30718|CH60_PSEAE	sp|P30718|CH60_PSEAE	14	14	14	>sp|P30718|CH60_PSEAE 60 kDa chaperonin OS=Pseudomonas aeruginosa (strain ATCC 15692 / PAO1 / 1C / PRS 101 / LMG 12228) GN=groL PE=1 SV=3	1	14	14	14	26.9	26.9	26.9	57.085	547	547	0	164.67	524520000	37				41	8;58;88;89;116;149;186;317;318;427;490;492;515;620	True;True;True;True;True;True;True;True;True;True;True;True;True;True	8;59;91;92;93;120;121;157;195;329;330;441;442;508;510;534;642	13;14;109;110;167;168;169;170;171;172;216;217;218;286;287;348;349;586;587;780;781;782;783;948;949;954;955;1008;1009;1224;1225	15;16;17;18;133;134;135;199;200;201;202;203;204;255;256;257;341;342;343;411;412;703;704;924;925;926;927;1147;1148;1155;1156;1157;1158;1221;1222;1499;1500	15;133;200;201;257;343;412;703;704;926;1147;1155;1221;1500	25;26;27;28	16;69;111;114
sp|P30720|CH10_PSEAE	sp|P30720|CH10_PSEAE	2	2	2	>sp|P30720|CH10_PSEAE 10 kDa chaperonin OS=Pseudomonas aeruginosa (strain ATCC 15692 / PAO1 / 1C / PRS 101 / LMG 12228) GN=groS PE=3 SV=1	1	2	2	2	41.2	41.2	41.2	10.267	97	97	0	14.086	35647000	6				42	564;682	True;True	585;705	1121;1122;1340;1341	1376;1377;1378;1379;1640;1641	1377;1640
sp|P31961|EDD_PSEAE	sp|P31961|EDD_PSEAE	1	1	1	>sp|P31961|EDD_PSEAE Phosphogluconate dehydratase OS=Pseudomonas aeruginosa (strain ATCC 15692 / PAO1 / 1C / PRS 101 / LMG 12228) GN=edd PE=3 SV=3	1	1	1	1	1.8	1.8	1.8	65.182	608	608	0	6.1123	1439700	1				43	308	TRUE	320	574	687	687
sp|P32722|PORD_PSEAE	sp|P32722|PORD_PSEAE	1	1	1	>sp|P32722|PORD_PSEAE Porin D OS=Pseudomonas aeruginosa (strain ATCC 15692 / PAO1 / 1C / PRS 101 / LMG 12228) GN=oprD PE=1 SV=1	1	1	1	1	3.4	3.4	3.4	48.36	443	443	0	5.482	788390	1				44	571	TRUE	592	1133	1390	1390	29	111
sp|P37798|ACCC_PSEAE	sp|P37798|ACCC_PSEAE	4	4	4	>sp|P37798|ACCC_PSEAE Biotin carboxylase OS=Pseudomonas aeruginosa (strain ATCC 15692 / PAO1 / 1C / PRS 101 / LMG 12228) GN=accC PE=1 SV=1	1	4	4	4	12.2	12.2	12.2	48.887	449	449	0	46.009	26860000	6				45	443;520;568;634	True;True;True;True	458;539;589;656	849;850;1015;1129;1249;1250	1031;1032;1229;1386;1530;1531	1031;1229;1386;1530
sp|P37799|BCCP_PSEAE	sp|P37799|BCCP_PSEAE	4	4	4	>sp|P37799|BCCP_PSEAE Biotin carboxyl carrier protein of acetyl-CoA carboxylase OS=Pseudomonas aeruginosa (strain ATCC 15692 / PAO1 / 1C / PRS 101 / LMG 12228) GN=accB PE=3 SV=1	1	4	4	4	46.8	46.8	46.8	16.455	156	156	0	71.5	770550000	14				46	7;378;547;563	True;True;True;True	7;391;566;567;584	12;698;699;1064;1065;1066;1119;1120	12;13;14;828;829;830;831;1290;1291;1292;1293;1373;1374;1375	13;831;1293;1373	30	87
sp|P38100|CARB_PSEAE	sp|P38100|CARB_PSEAE	1	1	1	>sp|P38100|CARB_PSEAE Carbamoyl-phosphate synthase large chain OS=Pseudomonas aeruginosa (strain ATCC 15692 / PAO1 / 1C / PRS 101 / LMG 12228) GN=carB PE=3 SV=3	1	1	1	1	1.4	1.4	1.4	117.33	1073	1073	0	13.729	4344300	1				47	584	TRUE	605	1158	1424	1424
sp|P43334|PH4H_PSEAE	sp|P43334|PH4H_PSEAE	1	1	1	>sp|P43334|PH4H_PSEAE Phenylalanine-4-hydroxylase OS=Pseudomonas aeruginosa (strain ATCC 15692 / PAO1 / 1C / PRS 101 / LMG 12228) GN=phhA PE=3 SV=2	1	1	1	1	3.4	3.4	3.4	30.321	262	262	0	6.1244	3675500	1				48	291	TRUE	302	539	648	648
sp|P43336|PHHC_PSEAE	sp|P43336|PHHC_PSEAE	3	3	3	>sp|P43336|PHHC_PSEAE Aromatic-amino-acid aminotransferase OS=Pseudomonas aeruginosa (strain ATCC 15692 / PAO1 / 1C / PRS 101 / LMG 12228) GN=phhC PE=3 SV=2	1	3	3	3	10.3	10.3	10.3	43.273	399	399	0	23.557	19808000	5				49	10;259;669	True;True;True	10;268;691	17;18;470;471;1315	21;22;558;559;1609	21;559;1609
sp|P47204|FTSZ_PSEAE	sp|P47204|FTSZ_PSEAE	2	2	2	>sp|P47204|FTSZ_PSEAE Cell division protein FtsZ OS=Pseudomonas aeruginosa (strain ATCC 15692 / PAO1 / 1C / PRS 101 / LMG 12228) GN=ftsZ PE=1 SV=2	1	2	2	2	5.8	5.8	5.8	41.218	394	394	0	12.361	8449500	2				50	205;597	True;True	214;618	382;1182	455;1451	455;1451
sp|P53593|SUCC_PSEAE	sp|P53593|SUCC_PSEAE	9	9	9	>sp|P53593|SUCC_PSEAE Succinyl-CoA ligase [ADP-forming] subunit beta OS=Pseudomonas aeruginosa (strain ATCC 15692 / PAO1 / 1C / PRS 101 / LMG 12228) GN=sucC PE=3 SV=2	1	9	9	9	26.8	26.8	26.8	41.542	388	388	0	105.86	204420000	18				51	28;85;144;254;284;338;464;481;496	True;True;True;True;True;True;True;True;True	28;88;151;263;295;350;479;499;514	47;48;159;160;275;276;461;462;525;526;620;894;895;932;962;963	55;56;189;190;191;328;329;549;550;629;630;631;741;1080;1081;1127;1165;1166	56;189;328;550;631;741;1080;1127;1166
sp|P53641|SODF_PSEAE	sp|P53641|SODF_PSEAE	3	3	3	>sp|P53641|SODF_PSEAE Superoxide dismutase [Fe] OS=Pseudomonas aeruginosa (strain ATCC 15692 / PAO1 / 1C / PRS 101 / LMG 12228) GN=sodB PE=3 SV=3	1	3	3	3	18.7	18.7	18.7	21.351	193	193	0	19.766	70252000	6				52	30;444;533	True;True;True	30;459;552	51;52;851;1040;1041	59;60;1033;1259;1260;1261	59;1033;1259
sp|P72173|AAT_PSEAE	sp|P72173|AAT_PSEAE	3	3	3	>sp|P72173|AAT_PSEAE Aspartate aminotransferase OS=Pseudomonas aeruginosa (strain ATCC 15692 / PAO1 / 1C / PRS 101 / LMG 12228) GN=aspC PE=3 SV=2	1	3	3	3	8.8	8.8	8.8	43.319	398	398	0	21.721	7525100	1				53	36;623;720	True;True;True	37;645;743	65;1230;1424	77;1505;1762	77;1505;1762
sp|Q51422|SYDND_PSEAE	sp|Q51422|SYDND_PSEAE	3	3	3	>sp|Q51422|SYDND_PSEAE Aspartate--tRNA(Asp/Asn) ligase OS=Pseudomonas aeruginosa (strain ATCC 15692 / PAO1 / 1C / PRS 101 / LMG 12228) GN=aspS PE=1 SV=2	1	3	3	3	6.3	6.3	6.3	66.207	591	591	0	23.801	12225000	4				54	289;624;657	True;True;True	300;646;679	536;1231;1232;1294;1295	643;1506;1507;1583;1584	643;1507;1584
sp|Q51561|RPOB_PSEAE	sp|Q51561|RPOB_PSEAE	7	7	7	>sp|Q51561|RPOB_PSEAE DNA-directed RNA polymerase subunit beta OS=Pseudomonas aeruginosa (strain ATCC 15692 / PAO1 / 1C / PRS 101 / LMG 12228) GN=rpoB PE=3 SV=2	1	7	7	7	6.5	6.5	6.5	150.84	1357	1357	0	56.827	75894000	12				55	65;215;307;397;430;546;552	True;True;True;True;True;True;True	66;67;224;319;410;445;565;572	122;123;124;395;396;572;573;728;729;787;1061;1062;1063;1077	147;148;149;470;471;685;686;861;862;931;1287;1288;1289;1313;1314	147;471;685;862;931;1287;1313	31	658
sp|Q51567|SUCD_PSEAE	sp|Q51567|SUCD_PSEAE	7	7	7	>sp|Q51567|SUCD_PSEAE Succinyl-CoA ligase [ADP-forming] subunit alpha OS=Pseudomonas aeruginosa (strain ATCC 15692 / PAO1 / 1C / PRS 101 / LMG 12228) GN=sucD PE=3 SV=2	1	7	7	7	31.2	31.2	31.2	30.266	295	295	0	58.833	123470000	14				56	45;63;127;155;199;256;525	True;True;True;True;True;True;True	46;64;132;163;208;265;544	84;85;119;234;235;297;298;371;464;465;466;1023;1024	98;99;144;276;277;278;353;354;443;552;553;554;1238;1239	98;144;276;353;443;554;1238
sp|Q59636|NDK_PSEAE	sp|Q59636|NDK_PSEAE	1	1	1	>sp|Q59636|NDK_PSEAE Nucleoside diphosphate kinase OS=Pseudomonas aeruginosa (strain ATCC 15692 / PAO1 / 1C / PRS 101 / LMG 12228) GN=ndk PE=3 SV=2	1	1	1	1	6.3	6.3	6.3	15.592	143	143	0	7.8859	15606000	2				57	474	TRUE	492	920;921	1115;1116	1116
sp|Q59637|ODP1_PSEAE	sp|Q59637|ODP1_PSEAE	10	10	10	>sp|Q59637|ODP1_PSEAE Pyruvate dehydrogenase E1 component OS=Pseudomonas aeruginosa (strain ATCC 15692 / PAO1 / 1C / PRS 101 / LMG 12228) GN=aceE PE=3 SV=2	1	10	10	10	12	12	12	99.563	882	882	0	70.933	90414000	14				58	4;181;213;252;268;299;309;390;432;542	True;True;True;True;True;True;True;True;True;True	4;190;222;261;277;310;321;403;447;561	8;339;340;392;458;485;486;557;558;575;716;790;1055;1056	8;402;403;467;546;573;574;670;671;688;849;934;1280;1281	8;402;467;546;573;670;688;849;934;1280
sp|Q59638|ODP2_PSEAE	sp|Q59638|ODP2_PSEAE	8	8	8	>sp|Q59638|ODP2_PSEAE Dihydrolipoyllysine-residue acetyltransferase component of pyruvate dehydrogenase complex OS=Pseudomonas aeruginosa (strain ATCC 15692 / PAO1 / 1C / PRS 101 / LMG 12228) GN=aceF PE=2 SV=2	1	8	8	8	23.8	23.8	23.8	56.708	547	547	0	60.696	96811000	16				59	17;18;20;350;362;373;409;625	True;True;True;True;True;True;True;True	17;18;20;362;374;386;422;647	28;29;30;33;34;640;641;665;666;688;749;750;1233;1234	33;34;35;40;41;764;765;789;790;791;816;888;889;890;1508;1509	33;35;41;765;789;816;888;1508	32	328
sp|Q9HT16|ATPF_PSEAE	sp|Q9HT16|ATPF_PSEAE	1	1	1	>sp|Q9HT16|ATPF_PSEAE ATP synthase subunit b OS=Pseudomonas aeruginosa (strain ATCC 15692 / PAO1 / 1C / PRS 101 / LMG 12228) GN=atpF PE=3 SV=1	1	1	1	1	7.1	7.1	7.1	16.956	156	156	0	7.8957	15216000	2				60	74	TRUE	76	138;139	163;164	163
sp|Q9HT18|ATPA_PSEAE	sp|Q9HT18|ATPA_PSEAE	9	9	9	>sp|Q9HT18|ATPA_PSEAE ATP synthase subunit alpha OS=Pseudomonas aeruginosa (strain ATCC 15692 / PAO1 / 1C / PRS 101 / LMG 12228) GN=atpA PE=3 SV=1	1	9	9	9	22	22	22	55.393	514	514	0	93.612	269280000	23				61	125;185;275;434;446;555;556;565;680	True;True;True;True;True;True;True;True;True	130;194;286;449;461;575;576;577;586;703	232;346;347;510;511;793;794;854;855;1102;1103;1104;1105;1106;1107;1123;1124;1336;1337	274;409;410;611;612;613;614;937;938;1037;1038;1351;1352;1353;1354;1355;1356;1357;1380;1381;1634;1635;1636	274;410;611;938;1038;1351;1357;1380;1636	33	157
sp|Q9HT19|ATPG_PSEAE	sp|Q9HT19|ATPG_PSEAE	1	1	1	>sp|Q9HT19|ATPG_PSEAE ATP synthase gamma chain OS=Pseudomonas aeruginosa (strain ATCC 15692 / PAO1 / 1C / PRS 101 / LMG 12228) GN=atpG PE=3 SV=1	1	1	1	1	3.1	3.1	3.1	31.553	286	286	0	7.5553	6351400	2				62	535	TRUE	554	1044;1045	1264;1265	1264
sp|Q9HT20|ATPB_PSEAE	sp|Q9HT20|ATPB_PSEAE	9	9	9	>sp|Q9HT20|ATPB_PSEAE ATP synthase subunit beta OS=Pseudomonas aeruginosa (strain ATCC 15692 / PAO1 / 1C / PRS 101 / LMG 12228) GN=atpD PE=3 SV=1	1	9	9	9	30.6	30.6	30.6	49.499	458	458	0	96.538	99580000	16				63	114;137;210;282;494;526;603;628;718	True;True;True;True;True;True;True;True;True	118;144;219;293;512;545;624;650;741	213;214;262;263;389;521;522;958;959;1025;1026;1189;1190;1238;1239;1420;1421	252;253;314;315;464;625;626;1161;1162;1240;1241;1458;1459;1513;1514;1515;1756;1757	253;315;464;625;1161;1241;1459;1513;1757
sp|Q9HT95|ATSE4_PSEAE	sp|Q9HT95|ATSE4_PSEAE	1	1	1	>sp|Q9HT95|ATSE4_PSEAE Acetyltransferase PA5475 OS=Pseudomonas aeruginosa (strain ATCC 15692 / PAO1 / 1C / PRS 101 / LMG 12228) GN=PA5475 PE=3 SV=1	1	1	1	1	5.9	5.9	5.9	21	186	186	0	9.4204	4971500	4				64	123	TRUE	128	227;228;229;230	269;270;271;272	272
sp|Q9HTD7|ASPA_PSEAE	sp|Q9HTD7|ASPA_PSEAE	1	1	1	>sp|Q9HTD7|ASPA_PSEAE Aspartate ammonia-lyase OS=Pseudomonas aeruginosa (strain ATCC 15692 / PAO1 / 1C / PRS 101 / LMG 12228) GN=aspA PE=3 SV=1	1	1	1	1	4.9	4.9	4.9	51.069	474	474	0	9.6529	5198800	1				65	710	TRUE	733	1406	1740	1740
sp|Q9HTN8|RL28_PSEAE	sp|Q9HTN8|RL28_PSEAE	1	1	1	>sp|Q9HTN8|RL28_PSEAE 50S ribosomal protein L28 OS=Pseudomonas aeruginosa (strain ATCC 15692 / PAO1 / 1C / PRS 101 / LMG 12228) GN=rpmB PE=3 SV=1	1	1	1	1	12.8	12.8	12.8	9.0655	78	78	0	6.9235	4861200	2				66	202	TRUE	211	376;377	448;449	449
sp|Q9HTZ7|PCKA_PSEAE	sp|Q9HTZ7|PCKA_PSEAE	1	1	1	>sp|Q9HTZ7|PCKA_PSEAE Phosphoenolpyruvate carboxykinase [ATP] OS=Pseudomonas aeruginosa (strain ATCC 15692 / PAO1 / 1C / PRS 101 / LMG 12228) GN=pckA PE=3 SV=1	1	1	1	1	2.5	2.5	2.5	55.731	513	513	0	10.823	2480600	3				67	437	TRUE	452	798;799	944;945;946	945
sp|Q9HU65|GLNA_PSEAE	sp|Q9HU65|GLNA_PSEAE	1	1	1	>sp|Q9HU65|GLNA_PSEAE Glutamine synthetase OS=Pseudomonas aeruginosa (strain ATCC 15692 / PAO1 / 1C / PRS 101 / LMG 12228) GN=glnA PE=1 SV=1	1	1	1	1	2.6	2.6	2.6	51.944	469	469	0	11.833	5000900	1				68	104	TRUE	108	198	236	236
sp|Q9HUC8|SYR_PSEAE	sp|Q9HUC8|SYR_PSEAE	1	1	1	>sp|Q9HUC8|SYR_PSEAE Arginine--tRNA ligase OS=Pseudomonas aeruginosa (strain ATCC 15692 / PAO1 / 1C / PRS 101 / LMG 12228) GN=argS PE=3 SV=1	1	1	1	1	1.9	1.9	1.9	65.199	587	587	0	7.8708	3506800	1				69	357	TRUE	369	654	778	778
sp|Q9HUM6|PURA_PSEAE	sp|Q9HUM6|PURA_PSEAE	2	2	2	>sp|Q9HUM6|PURA_PSEAE Adenylosuccinate synthetase OS=Pseudomonas aeruginosa (strain ATCC 15692 / PAO1 / 1C / PRS 101 / LMG 12228) GN=purA PE=3 SV=1	1	2	2	2	4.9	4.9	4.9	46.814	430	430	0	15.442	9002200	4				70	336;577	True;True	348;598	616;617;1141;1142	737;738;1398;1399	737;1398
sp|Q9HUM9|RS6_PSEAE	sp|Q9HUM9|RS6_PSEAE	1	1	1	>sp|Q9HUM9|RS6_PSEAE 30S ribosomal protein S6 OS=Pseudomonas aeruginosa (strain ATCC 15692 / PAO1 / 1C / PRS 101 / LMG 12228) GN=rpsF PE=3 SV=1	1	1	1	1	7.2	7.2	7.2	16.164	139	139	0	8.7687	18307000	3				71	44	TRUE	45	82;83	95;96;97	95
sp|Q9HV43|DNAK_PSEAE	sp|Q9HV43|DNAK_PSEAE	8	8	8	>sp|Q9HV43|DNAK_PSEAE Chaperone protein DnaK OS=Pseudomonas aeruginosa (strain ATCC 15692 / PAO1 / 1C / PRS 101 / LMG 12228) GN=dnaK PE=3 SV=1	1	8	8	8	17.1	17.1	17.1	68.402	637	637	0	127.59	132570000	16				72	0;14;52;267;341;358;428;438	True;True;True;True;True;True;True;True	0;14;53;276;353;370;443;453	0;1;2;3;23;24;97;98;484;624;625;655;656;784;785;800	0;1;2;3;27;28;119;120;572;747;748;779;780;928;929;947	3;27;119;572;747;779;929;947
sp|Q9HV55|IF2_PSEAE	sp|Q9HV55|IF2_PSEAE	1	1	1	>sp|Q9HV55|IF2_PSEAE Translation initiation factor IF-2 OS=Pseudomonas aeruginosa (strain ATCC 15692 / PAO1 / 1C / PRS 101 / LMG 12228) GN=infB PE=3 SV=1	1	1	1	1	1.4	1.4	1.4	90.911	840	840	0	6.3435	1737100	1				73	244	TRUE	253	446	528	528
sp|Q9HV59|PNP_PSEAE	sp|Q9HV59|PNP_PSEAE	8	8	8	>sp|Q9HV59|PNP_PSEAE Polyribonucleotide nucleotidyltransferase OS=Pseudomonas aeruginosa (strain ATCC 15692 / PAO1 / 1C / PRS 101 / LMG 12228) GN=pnp PE=3 SV=1	1	8	8	8	10.7	10.7	10.7	75.452	701	701	0	58.355	88185000	13				74	64;72;130;229;288;380;381;648	True;True;True;True;True;True;True;True	65;74;135;238;299;393;394;670	120;121;135;136;242;243;418;534;535;702;703;1276;1277	145;146;160;161;287;288;497;641;642;834;835;1562;1563	146;160;287;497;642;834;835;1562
sp|Q9HVC4|RL25_PSEAE	sp|Q9HVC4|RL25_PSEAE	3	3	3	>sp|Q9HVC4|RL25_PSEAE 50S ribosomal protein L25 OS=Pseudomonas aeruginosa (strain ATCC 15692 / PAO1 / 1C / PRS 101 / LMG 12228) GN=rplY PE=3 SV=1	1	3	3	3	23	23	23	21.962	204	204	0	26.226	47979000	6				75	117;226;617	True;True;True	122;235;639	219;414;1218;1219;1220;1221	258;493;1493;1494;1495;1496	258;493;1494
sp|Q9HVD1|PAGL_PSEAE	sp|Q9HVD1|PAGL_PSEAE	2	2	2	>sp|Q9HVD1|PAGL_PSEAE Lipid A deacylase PagL OS=Pseudomonas aeruginosa (strain ATCC 15692 / PAO1 / 1C / PRS 101 / LMG 12228) GN=pagL PE=1 SV=1	1	2	2	2	14.5	14.5	14.5	18.393	173	173	0	16.776	6340100	2				76	159;626	True;True	167;648	303;1235	359;1510	359;1510
sp|Q9HVI7|GLYA3_PSEAE;sp|Q9I138|GLYA2_PSEAE	sp|Q9HVI7|GLYA3_PSEAE	3;1	3;1	3;1	>sp|Q9HVI7|GLYA3_PSEAE Serine hydroxymethyltransferase 3 OS=Pseudomonas aeruginosa (strain ATCC 15692 / PAO1 / 1C / PRS 101 / LMG 12228) GN=glyA2 PE=3 SV=1	2	3	3	3	6.2	6.2	6.2	45.157	417	417;418	0	19.4	20141000	3				77	261;545;600	True;True;True	270;564;621	474;1059;1060;1185	562;1285;1286;1454	562;1285;1454
sp|Q9HVL6|RL21_PSEAE	sp|Q9HVL6|RL21_PSEAE	2	2	2	>sp|Q9HVL6|RL21_PSEAE 50S ribosomal protein L21 OS=Pseudomonas aeruginosa (strain ATCC 15692 / PAO1 / 1C / PRS 101 / LMG 12228) GN=rplU PE=3 SV=1	1	2	2	2	20.4	20.4	20.4	11.653	103	103	0	12.365	34776000	2				78	258;646	True;True	267;668	468;469;1272;1273	556;557;1558;1559	556;1559
sp|Q9HVN5|CLPB_PSEAE	sp|Q9HVN5|CLPB_PSEAE	4	4	4	>sp|Q9HVN5|CLPB_PSEAE Chaperone protein ClpB OS=Pseudomonas aeruginosa (strain ATCC 15692 / PAO1 / 1C / PRS 101 / LMG 12228) GN=clpB PE=3 SV=1	1	4	4	4	5.9	5.9	5.9	95.004	854	854	0	34.327	8817800	6				79	27;191;296;356	True;True;True;True	27;200;307;368	45;46;355;356;550;653	53;54;420;421;660;777	54;421;660;777
sp|Q9HVT8|GATA_PSEAE	sp|Q9HVT8|GATA_PSEAE	1	1	1	>sp|Q9HVT8|GATA_PSEAE Glutamyl-tRNA(Gln) amidotransferase subunit A OS=Pseudomonas aeruginosa (strain ATCC 15692 / PAO1 / 1C / PRS 101 / LMG 12228) GN=gatA PE=1 SV=1	1	1	1	1	3.3	3.3	3.3	51.862	484	484	0	9.0646	2064700	2				80	658	TRUE	680	1296;1297	1585;1586	1585
sp|Q9HVY3|RS9_PSEAE	sp|Q9HVY3|RS9_PSEAE	1	1	1	>sp|Q9HVY3|RS9_PSEAE 30S ribosomal protein S9 OS=Pseudomonas aeruginosa (strain ATCC 15692 / PAO1 / 1C / PRS 101 / LMG 12228) GN=rpsI PE=3 SV=1	1	1	1	1	7.7	7.7	7.7	14.615	130	130	0	6.8671	9870000	2				81	55	TRUE	56	103;104	125;126	126
sp|Q9HW04|ARGJ_PSEAE	sp|Q9HW04|ARGJ_PSEAE	1	1	1	>sp|Q9HW04|ARGJ_PSEAE Arginine biosynthesis bifunctional protein ArgJ OS=Pseudomonas aeruginosa (strain ATCC 15692 / PAO1 / 1C / PRS 101 / LMG 12228) GN=argJ PE=3 SV=1	1	1	1	1	2.7	2.7	2.7	41.762	405	405	0	8.558	4804200	1				82	604	TRUE	625	1191;1192	1460;1461	1460
sp|Q9HWC6|RL1_PSEAE	sp|Q9HWC6|RL1_PSEAE	2	2	2	>sp|Q9HWC6|RL1_PSEAE 50S ribosomal protein L1 OS=Pseudomonas aeruginosa (strain ATCC 15692 / PAO1 / 1C / PRS 101 / LMG 12228) GN=rplA PE=3 SV=1	1	2	2	2	10	10	10	24.234	231	231	0	13.612	9448800	3				83	365;398	True;True	377;411	672;730;731	797;863;864	797;864
sp|Q9HWC7|RL10_PSEAE	sp|Q9HWC7|RL10_PSEAE	3	3	3	>sp|Q9HWC7|RL10_PSEAE 50S ribosomal protein L10 OS=Pseudomonas aeruginosa (strain ATCC 15692 / PAO1 / 1C / PRS 101 / LMG 12228) GN=rplJ PE=3 SV=1	1	3	3	3	22.3	22.3	22.3	17.634	166	166	0	33.667	42200000	9				84	6;43;93	True;True;True	6;44;97	10;11;80;81;179;180	10;11;93;94;211;212;213;214;215	10;94;212
sp|Q9HWC8|RL7_PSEAE	sp|Q9HWC8|RL7_PSEAE	1	1	1	>sp|Q9HWC8|RL7_PSEAE 50S ribosomal protein L7/L12 OS=Pseudomonas aeruginosa (strain ATCC 15692 / PAO1 / 1C / PRS 101 / LMG 12228) GN=rplL PE=3 SV=1	1	1	1	1	9	9	9	12.479	122	122	0	6.5894	50389000	2				85	96	TRUE	100	183;184	218;219	218
sp|Q9HWC9|RPOC_PSEAE	sp|Q9HWC9|RPOC_PSEAE	12	12	12	>sp|Q9HWC9|RPOC_PSEAE DNA-directed RNA polymerase subunit beta OS=Pseudomonas aeruginosa (strain ATCC 15692 / PAO1 / 1C / PRS 101 / LMG 12228) GN=rpoC PE=3 SV=1	1	12	12	12	9.9	9.9	9.9	154.38	1399	1399	0	93.86	97203000	21				86	187;257;273;352;366;394;399;471;518;601;647;670	True;True;True;True;True;True;True;True;True;True;True;True	196;266;284;364;378;407;412;489;537;622;669;692	350;467;507;643;644;673;674;722;723;732;733;915;916;1012;1013;1186;1274;1275;1316;1317	413;555;608;767;768;798;799;855;856;865;866;1109;1110;1225;1226;1227;1455;1560;1561;1610;1611	413;555;608;767;798;856;865;1110;1225;1455;1560;1611
sp|Q9HWD1|RS7_PSEAE	sp|Q9HWD1|RS7_PSEAE	1	1	1	>sp|Q9HWD1|RS7_PSEAE 30S ribosomal protein S7 OS=Pseudomonas aeruginosa (strain ATCC 15692 / PAO1 / 1C / PRS 101 / LMG 12228) GN=rpsG PE=3 SV=1	1	1	1	1	7.7	7.7	7.7	17.504	156	156	0	7.6822	0	2				87	325	TRUE	337	598;599	718;719	718
sp|Q9HWD2|EFG1_PSEAE;sp|Q9I244|EFG2_PSEAE	sp|Q9HWD2|EFG1_PSEAE	14;5	14;5	14;5	>sp|Q9HWD2|EFG1_PSEAE Elongation factor G 1 OS=Pseudomonas aeruginosa (strain ATCC 15692 / PAO1 / 1C / PRS 101 / LMG 12228) GN=fusA PE=1 SV=1	2	14	14	14	26.3	26.3	26.3	77.784	706	706;702	0	161.62	253690000	33				88	26;33;139;176;208;228;242;328;351;418;449;641;695;709	True;True;True;True;True;True;True;True;True;True;True;True;True;True	26;33;34;146;185;217;237;251;340;363;431;464;663;718;732	43;44;59;60;265;266;332;333;386;387;416;417;442;443;603;604;642;765;859;860;1262;1263;1264;1367;1368;1404;1405	50;51;52;69;70;317;318;319;395;396;459;460;461;462;495;496;524;525;723;724;766;908;1042;1043;1548;1549;1550;1675;1676;1677;1678;1738;1739	50;69;317;396;461;495;525;724;766;908;1042;1550;1677;1738	34	388
sp|Q9HWD5|RL3_PSEAE	sp|Q9HWD5|RL3_PSEAE	2	2	2	>sp|Q9HWD5|RL3_PSEAE 50S ribosomal protein L3 OS=Pseudomonas aeruginosa (strain ATCC 15692 / PAO1 / 1C / PRS 101 / LMG 12228) GN=rplC PE=3 SV=1	1	2	2	2	13.3	13.3	13.3	22.591	211	211	0	18.729	39660000	4				89	184;678	True;True	193;701	344;345;1333;1334	407;408;1631;1632	408;1631
sp|Q9HWD8|RL2_PSEAE	sp|Q9HWD8|RL2_PSEAE	4	4	4	>sp|Q9HWD8|RL2_PSEAE 50S ribosomal protein L2 OS=Pseudomonas aeruginosa (strain ATCC 15692 / PAO1 / 1C / PRS 101 / LMG 12228) GN=rplB PE=3 SV=1	1	4	4	4	23.8	23.8	23.8	29.579	273	273	0	44.533	81832000	10				90	86;223;225;452	True;True;True;True	89;232;234;467	161;162;163;164;408;409;412;413;865	192;193;194;195;486;487;490;491;492;1048	193;486;490;1048
sp|Q9HWE0|RL22_PSEAE	sp|Q9HWE0|RL22_PSEAE	1	1	1	>sp|Q9HWE0|RL22_PSEAE 50S ribosomal protein L22 OS=Pseudomonas aeruginosa (strain ATCC 15692 / PAO1 / 1C / PRS 101 / LMG 12228) GN=rplV PE=3 SV=1	1	1	1	1	11.8	11.8	11.8	11.911	110	110	0	13.572	13239000	2				91	627	TRUE	649	1236;1237	1511;1512	1512
sp|Q9HWE1|RS3_PSEAE	sp|Q9HWE1|RS3_PSEAE	1	1	1	>sp|Q9HWE1|RS3_PSEAE 30S ribosomal protein S3 OS=Pseudomonas aeruginosa (strain ATCC 15692 / PAO1 / 1C / PRS 101 / LMG 12228) GN=rpsC PE=3 SV=1	1	1	1	1	4.8	4.8	4.8	25.838	228	228	0	7.7503	0	1				92	476	TRUE	494	924	1119	1119
sp|Q9HWE2|RL16_PSEAE	sp|Q9HWE2|RL16_PSEAE	2	2	2	>sp|Q9HWE2|RL16_PSEAE 50S ribosomal protein L16 OS=Pseudomonas aeruginosa (strain ATCC 15692 / PAO1 / 1C / PRS 101 / LMG 12228) GN=rplP PE=3 SV=1	1	2	2	2	13.1	13.1	13.1	15.401	137	137	0	12.121	37190000	4				93	391;668	True;True	404;690	717;718;1313;1314	850;851;1607;1608	851;1608
sp|Q9HWE4|RS17_PSEAE	sp|Q9HWE4|RS17_PSEAE	1	1	1	>sp|Q9HWE4|RS17_PSEAE 30S ribosomal protein S17 OS=Pseudomonas aeruginosa (strain ATCC 15692 / PAO1 / 1C / PRS 101 / LMG 12228) GN=rpsQ PE=3 SV=1	1	1	1	1	11.4	11.4	11.4	10.086	88	88	0	8.3437	2428300	3				94	98	TRUE	102	186;187	221;222;223	223
sp|Q9HWE5|RL14_PSEAE	sp|Q9HWE5|RL14_PSEAE	2	2	2	>sp|Q9HWE5|RL14_PSEAE 50S ribosomal protein L14 OS=Pseudomonas aeruginosa (strain ATCC 15692 / PAO1 / 1C / PRS 101 / LMG 12228) GN=rplN PE=3 SV=1	1	2	2	2	17.2	17.2	17.2	13.412	122	122	0	18.388	25804000	3				95	162;696	True;True	170;719	307;308;1369	364;365;1679	364;1679
sp|Q9HWE6|RL24_PSEAE	sp|Q9HWE6|RL24_PSEAE	1	1	1	>sp|Q9HWE6|RL24_PSEAE 50S ribosomal protein L24 OS=Pseudomonas aeruginosa (strain ATCC 15692 / PAO1 / 1C / PRS 101 / LMG 12228) GN=rplX PE=3 SV=1	1	1	1	1	9.6	9.6	9.6	11.47	104	104	0	6.9079	20056000	2				96	415	TRUE	428	760;761	902;903	902
sp|Q9HWE8|RS14_PSEAE	sp|Q9HWE8|RS14_PSEAE	2	2	2	>sp|Q9HWE8|RS14_PSEAE 30S ribosomal protein S14 OS=Pseudomonas aeruginosa (strain ATCC 15692 / PAO1 / 1C / PRS 101 / LMG 12228) GN=rpsN PE=3 SV=1	1	2	2	2	21.8	21.8	21.8	11.565	101	101	0	15.357	32162000	4				97	41;692	True;True	42;715	76;77;1361;1362	89;90;1667;1668	89;1668
sp|Q9HWE9|RS8_PSEAE	sp|Q9HWE9|RS8_PSEAE	1	1	1	>sp|Q9HWE9|RS8_PSEAE 30S ribosomal protein S8 OS=Pseudomonas aeruginosa (strain ATCC 15692 / PAO1 / 1C / PRS 101 / LMG 12228) GN=rpsH PE=3 SV=1	1	1	1	1	9.2	9.2	9.2	14.17	130	130	0	9.3274	4519900	1				98	541	TRUE	560	1054	1279	1279
sp|Q9HWF0|RL6_PSEAE	sp|Q9HWF0|RL6_PSEAE	2	2	2	>sp|Q9HWF0|RL6_PSEAE 50S ribosomal protein L6 OS=Pseudomonas aeruginosa (strain ATCC 15692 / PAO1 / 1C / PRS 101 / LMG 12228) GN=rplF PE=3 SV=1	1	2	2	2	13.6	13.6	13.6	19.099	177	177	0	11.082	21842000	5				99	326;630	True;True	338;652	600;1242;1243	720;1518;1519;1520;1521	720;1518
sp|Q9HWF2|RS5_PSEAE	sp|Q9HWF2|RS5_PSEAE	2	2	2	>sp|Q9HWF2|RS5_PSEAE 30S ribosomal protein S5 OS=Pseudomonas aeruginosa (strain ATCC 15692 / PAO1 / 1C / PRS 101 / LMG 12228) GN=rpsE PE=3 SV=1	1	2	2	2	15.1	15.1	15.1	17.625	166	166	0	16.503	10942000	3				100	94;466	True;True	98;481	181;898;899	216;1084;1085	216;1084
sp|Q9HWF3|RL30_PSEAE	sp|Q9HWF3|RL30_PSEAE	1	1	1	>sp|Q9HWF3|RL30_PSEAE 50S ribosomal protein L30 OS=Pseudomonas aeruginosa (strain ATCC 15692 / PAO1 / 1C / PRS 101 / LMG 12228) GN=rpmD PE=1 SV=3	1	1	1	1	24.1	24.1	24.1	6.4775	58	58	0	8.5965	2381400	2				101	283	TRUE	294	523;524	627;628	627
sp|Q9HWF4|RL15_PSEAE	sp|Q9HWF4|RL15_PSEAE	3	3	3	>sp|Q9HWF4|RL15_PSEAE 50S ribosomal protein L15 OS=Pseudomonas aeruginosa (strain ATCC 15692 / PAO1 / 1C / PRS 101 / LMG 12228) GN=rplO PE=3 SV=1	1	3	3	3	22.2	22.2	22.2	15.174	144	144	0	25.785	30836000	5				102	105;614;650	True;True;True	109;636;672	199;1212;1213;1279;1280	237;1486;1487;1565;1566	237;1486;1565
sp|Q9HWX5|RISB_PSEAE	sp|Q9HWX5|RISB_PSEAE	1	1	1	>sp|Q9HWX5|RISB_PSEAE 6,7-dimethyl-8-ribityllumazine synthase OS=Pseudomonas aeruginosa (strain ATCC 15692 / PAO1 / 1C / PRS 101 / LMG 12228) GN=ribH PE=3 SV=1	1	1	1	1	8.2	8.2	8.2	16.413	158	158	0	5.6523	2770500	1				103	66	TRUE	68	125	150	150
sp|Q9HX33|SYL_PSEAE	sp|Q9HX33|SYL_PSEAE	1	1	1	>sp|Q9HX33|SYL_PSEAE Leucine--tRNA ligase OS=Pseudomonas aeruginosa (strain ATCC 15692 / PAO1 / 1C / PRS 101 / LMG 12228) GN=leuS PE=3 SV=1	1	1	1	1	1.9	1.9	1.9	97.647	873	873	0.0097561	5.4083	15723000	1				104	477	TRUE	495	925	1120	1120	35	68
sp|Q9HXM6|GUAA_PSEAE	sp|Q9HXM6|GUAA_PSEAE	2	2	2	>sp|Q9HXM6|GUAA_PSEAE GMP synthase [glutamine-hydrolyzing] OS=Pseudomonas aeruginosa (strain ATCC 15692 / PAO1 / 1C / PRS 101 / LMG 12228) GN=guaA PE=3 SV=1	1	2	2	2	3.8	3.8	3.8	57.959	525	525	0	14.891	18188000	4				105	69;686	True;True	71;709	129;130;1347;1348	154;155;1647;1648	155;1647
sp|Q9HXP3|PURT_PSEAE	sp|Q9HXP3|PURT_PSEAE	1	1	1	>sp|Q9HXP3|PURT_PSEAE Phosphoribosylglycinamide formyltransferase 2 OS=Pseudomonas aeruginosa (strain ATCC 15692 / PAO1 / 1C / PRS 101 / LMG 12228) GN=purT PE=3 SV=1	1	1	1	1	3.1	3.1	3.1	42.342	393	393	0.0096154	5.3734	966750	0				106	707	TRUE	730	1401	1733	1733
sp|Q9HXP9|RS16_PSEAE	sp|Q9HXP9|RS16_PSEAE	1	1	1	>sp|Q9HXP9|RS16_PSEAE 30S ribosomal protein S16 OS=Pseudomonas aeruginosa (strain ATCC 15692 / PAO1 / 1C / PRS 101 / LMG 12228) GN=rpsP PE=3 SV=1	1	1	1	1	16.9	16.9	16.9	9.2043	83	83	0	8.4901	14198000	2				107	253	TRUE	262	459;460	547;548	548
sp|Q9HXZ4|PYRG_PSEAE	sp|Q9HXZ4|PYRG_PSEAE	1	1	1	>sp|Q9HXZ4|PYRG_PSEAE CTP synthase OS=Pseudomonas aeruginosa (strain ATCC 15692 / PAO1 / 1C / PRS 101 / LMG 12228) GN=pyrG PE=3 SV=1	1	1	1	1	3.1	3.1	3.1	59.617	542	542	0	6.84	15664000	2				108	292	TRUE	303	540;541	649;650	649
sp|Q9HXZ5|ENO_PSEAE	sp|Q9HXZ5|ENO_PSEAE	4	4	4	>sp|Q9HXZ5|ENO_PSEAE Enolase OS=Pseudomonas aeruginosa (strain ATCC 15692 / PAO1 / 1C / PRS 101 / LMG 12228) GN=eno PE=3 SV=1	1	4	4	4	10.3	10.3	10.3	45.195	429	429	0	34.838	35516000	7				109	3;91;203;666	True;True;True;True	3;95;212;688	7;175;176;378;1309;1310	7;207;208;450;1602;1603;1604	7;207;450;1604
sp|Q9HYC7|SYM_PSEAE	sp|Q9HYC7|SYM_PSEAE	1	1	1	>sp|Q9HYC7|SYM_PSEAE Methionine--tRNA ligase OS=Pseudomonas aeruginosa (strain ATCC 15692 / PAO1 / 1C / PRS 101 / LMG 12228) GN=metG PE=3 SV=1	1	1	1	1	1.3	1.3	1.3	74.903	677	677	0	5.9996	2745200	2				110	386	TRUE	399	709;710	841;842	841
sp|Q9HZ71|RS1_PSEAE	sp|Q9HZ71|RS1_PSEAE	5	5	5	>sp|Q9HZ71|RS1_PSEAE 30S ribosomal protein S1 OS=Pseudomonas aeruginosa (strain ATCC 15692 / PAO1 / 1C / PRS 101 / LMG 12228) GN=rpsA PE=3 SV=1	1	5	5	5	11.8	11.8	11.8	61.869	559	559	0	69.839	51751000	8				111	136;316;497;544;558	True;True;True;True;True	143;328;515;563;579	260;261;585;964;965;1058;1110;1111	312;313;702;1167;1168;1283;1284;1360;1361	312;702;1168;1284;1361
sp|Q9HZE0|DHE2_PSEAE	sp|Q9HZE0|DHE2_PSEAE	11	11	11	>sp|Q9HZE0|DHE2_PSEAE NAD-specific glutamate dehydrogenase OS=Pseudomonas aeruginosa (strain ATCC 15692 / PAO1 / 1C / PRS 101 / LMG 12228) GN=gdhB PE=1 SV=1	1	11	11	11	7.9	7.9	7.9	182.64	1620	1620	0	77.134	97775000	13				112	13;42;50;121;145;222;363;377;642;676;716	True;True;True;True;True;True;True;True;True;True;True	13;43;51;126;152;231;375;390;664;699;739	22;78;79;93;94;225;277;278;407;667;696;697;1265;1266;1330;1417	26;91;92;115;116;267;330;331;485;792;826;827;1551;1552;1628;1753	26;91;115;267;331;485;792;826;1552;1628;1753
sp|Q9HZP5|ETFD_PSEAE	sp|Q9HZP5|ETFD_PSEAE	2	2	2	>sp|Q9HZP5|ETFD_PSEAE Electron transfer flavoprotein-ubiquinone oxidoreductase OS=Pseudomonas aeruginosa (strain ATCC 15692 / PAO1 / 1C / PRS 101 / LMG 12228) GN=PA2953 PE=1 SV=1	1	2	2	2	3.3	3.3	3.3	59.928	551	551	0	12.097	3060100	3				113	57;660	True;True	58;682	107;108;1300	131;132;1589	131;1589
sp|Q9HZP6|ETFB_PSEAE	sp|Q9HZP6|ETFB_PSEAE	1	1	1	>sp|Q9HZP6|ETFB_PSEAE Electron transfer flavoprotein subunit beta OS=Pseudomonas aeruginosa (strain ATCC 15692 / PAO1 / 1C / PRS 101 / LMG 12228) GN=etfB PE=3 SV=1	1	1	1	1	4.8	4.8	4.8	26.376	249	249	0.0098522	5.4346	3908200	1				114	618	TRUE	640	1222	1497	1497
sp|Q9HZZ2|EFP_PSEAE	sp|Q9HZZ2|EFP_PSEAE	3	3	3	>sp|Q9HZZ2|EFP_PSEAE Elongation factor P OS=Pseudomonas aeruginosa (strain ATCC 15692 / PAO1 / 1C / PRS 101 / LMG 12228) GN=efp PE=1 SV=1	1	3	3	3	19.7	19.7	19.7	20.985	188	188	0	26.971	28574000	2				115	11;462;635	True;True;True	11;477;657	19;20;891;1251;1252	23;24;1077;1532;1533	23;1077;1533
sp|Q9I0A4|SYFB_PSEAE	sp|Q9I0A4|SYFB_PSEAE	1	1	1	>sp|Q9I0A4|SYFB_PSEAE Phenylalanine--tRNA ligase beta subunit OS=Pseudomonas aeruginosa (strain ATCC 15692 / PAO1 / 1C / PRS 101 / LMG 12228) GN=pheT PE=1 SV=1	1	1	1	1	1.5	1.5	1.5	86.799	792	792	0	5.9676	952070	0				116	413	TRUE	426	757	899	899
sp|Q9I0K4|ACEA_PSEAE	sp|Q9I0K4|ACEA_PSEAE	2	2	2	>sp|Q9I0K4|ACEA_PSEAE Isocitrate lyase OS=Pseudomonas aeruginosa (strain ATCC 15692 / PAO1 / 1C / PRS 101 / LMG 12228) GN=PA2634 PE=1 SV=1	1	2	2	2	3.8	3.8	3.8	58.886	531	531	0	12.911	21493000	2				117	330;677	True;True	342;700	607;608;1331;1332	728;729;1629;1630	728;1630
sp|Q9I137|GCSP1_PSEAE	sp|Q9I137|GCSP1_PSEAE	1	1	1	>sp|Q9I137|GCSP1_PSEAE Glycine dehydrogenase (decarboxylating) 1 OS=Pseudomonas aeruginosa (strain ATCC 15692 / PAO1 / 1C / PRS 101 / LMG 12228) GN=gcvP1 PE=3 SV=1	1	1	1	1	0.7	0.7	0.7	103.92	959	959	0	6.241	10340000	2				118	393	TRUE	406	720;721	853;854	854
sp|Q9I2A8|ATOB_PSEAE	sp|Q9I2A8|ATOB_PSEAE	4	4	4	>sp|Q9I2A8|ATOB_PSEAE Acetyl-CoA acetyltransferase OS=Pseudomonas aeruginosa (strain ATCC 15692 / PAO1 / 1C / PRS 101 / LMG 12228) GN=atoB PE=3 SV=1	1	4	4	4	10.9	10.9	10.9	40.405	393	393	0	24.098	58093000	5				119	53;54;138;649	True;True;True;True	54;55;145;671	99;100;101;102;264;1278	121;122;123;124;316;1564	122;123;316;1564
sp|Q9I2U0|CLPX_PSEAE	sp|Q9I2U0|CLPX_PSEAE	1	1	1	>sp|Q9I2U0|CLPX_PSEAE ATP-dependent Clp protease ATP-binding subunit ClpX OS=Pseudomonas aeruginosa (strain ATCC 15692 / PAO1 / 1C / PRS 101 / LMG 12228) GN=clpX PE=3 SV=1	1	1	1	1	2.3	2.3	2.3	46.991	426	426	0	6.0396	2509400	2				120	164	TRUE	173	313;314	370;371	370
sp|Q9I2U1|CLPP1_PSEAE	sp|Q9I2U1|CLPP1_PSEAE	1	1	1	>sp|Q9I2U1|CLPP1_PSEAE ATP-dependent Clp protease proteolytic subunit 1 OS=Pseudomonas aeruginosa (strain ATCC 15692 / PAO1 / 1C / PRS 101 / LMG 12228) GN=clpP1 PE=3 SV=1	1	1	1	1	8.5	8.5	8.5	23.502	213	213	0	6.451	5280800	0				121	382	TRUE	395	704	836	836
sp|Q9I2V5|ACNB_PSEAE	sp|Q9I2V5|ACNB_PSEAE	13	13	13	>sp|Q9I2V5|ACNB_PSEAE Aconitate hydratase B OS=Pseudomonas aeruginosa (strain ATCC 15692 / PAO1 / 1C / PRS 101 / LMG 12228) GN=acnB PE=3 SV=1	1	13	13	13	19	19	19	93.627	869	869	0	104.45	218340000	26				122	22;35;111;189;200;237;290;389;426;572;586;667;712	True;True;True;True;True;True;True;True;True;True;True;True;True	22;36;115;198;209;246;301;402;440;593;607;689;735	36;37;63;64;208;209;352;372;373;435;537;538;714;715;778;779;1134;1161;1162;1311;1312;1409;1410	43;44;75;76;246;247;415;444;445;517;644;645;646;647;847;848;922;923;1391;1427;1428;1605;1606;1743;1744;1745;1746	44;76;247;415;444;517;646;847;922;1391;1427;1606;1744
sp|Q9I3D1|DLDH2_PSEAE	sp|Q9I3D1|DLDH2_PSEAE	7	7	7	>sp|Q9I3D1|DLDH2_PSEAE Dihydrolipoyl dehydrogenase OS=Pseudomonas aeruginosa (strain ATCC 15692 / PAO1 / 1C / PRS 101 / LMG 12228) GN=lpdG PE=3 SV=1	1	7	7	7	17.6	17.6	17.6	50.164	478	478	0	67.743	139120000	13				123	61;79;173;230;348;463;591	True;True;True;True;True;True;True	62;81;82;182;239;360;478;612	115;116;147;148;149;328;329;419;637;892;893;1169;1170	140;141;174;175;176;391;392;498;761;1078;1079;1438;1439	141;176;392;498;761;1079;1439	36	336
sp|Q9I3F5|ACNA_PSEAE	sp|Q9I3F5|ACNA_PSEAE	5	5	5	>sp|Q9I3F5|ACNA_PSEAE Aconitate hydratase A OS=Pseudomonas aeruginosa (strain ATCC 15692 / PAO1 / 1C / PRS 101 / LMG 12228) GN=acnA PE=3 SV=1	1	5	5	5	6.9	6.9	6.9	99.147	910	910	0	44.155	45943000	7				124	206;245;285;645;715	True;True;True;True;True	215;254;296;667;738	383;447;527;528;1270;1271;1415;1416	456;529;632;633;1556;1557;1751;1752	456;529;632;1556;1752
sp|Q9I4G3|NAPA_PSEAE	sp|Q9I4G3|NAPA_PSEAE	1	1	1	>sp|Q9I4G3|NAPA_PSEAE Periplasmic nitrate reductase OS=Pseudomonas aeruginosa (strain ATCC 15692 / PAO1 / 1C / PRS 101 / LMG 12228) GN=napA PE=3 SV=1	1	1	1	1	1.3	1.3	1.3	92.974	829	829	0	6.7874	2395300	1				125	385	TRUE	398	708	840	840
sp|Q9I4W3|DAPA_PSEAE	sp|Q9I4W3|DAPA_PSEAE	2	2	2	>sp|Q9I4W3|DAPA_PSEAE 4-hydroxy-tetrahydrodipicolinate synthase OS=Pseudomonas aeruginosa (strain ATCC 15692 / PAO1 / 1C / PRS 101 / LMG 12228) GN=dapA PE=1 SV=1	1	2	2	2	7.2	7.2	7.2	31.449	292	292	0	14.406	7712300	1				126	51;392	True;True	52;405	95;96;719	117;118;852	118;852
sp|Q9I4Z4|PAL_PSEAE	sp|Q9I4Z4|PAL_PSEAE	1	1	1	>sp|Q9I4Z4|PAL_PSEAE Peptidoglycan-associated lipoprotein OS=Pseudomonas aeruginosa (strain ATCC 15692 / PAO1 / 1C / PRS 101 / LMG 12228) GN=pal PE=3 SV=1	1	1	1	1	10.1	10.1	10.1	17.925	168	168	0	8.8066	6427000	2				127	150	TRUE	158	288;289	344;345	345
sp|Q9I502|SYP_PSEAE	sp|Q9I502|SYP_PSEAE	1	1	1	>sp|Q9I502|SYP_PSEAE Proline--tRNA ligase OS=Pseudomonas aeruginosa (strain ATCC 15692 / PAO1 / 1C / PRS 101 / LMG 12228) GN=proS PE=3 SV=1	1	1	1	1	2.3	2.3	2.3	63.103	571	571	0	5.8751	746410	1				128	679	TRUE	702	1335	1633	1633
sp|Q9I576|HPPD_PSEAE	sp|Q9I576|HPPD_PSEAE	1	1	1	>sp|Q9I576|HPPD_PSEAE 4-hydroxyphenylpyruvate dioxygenase OS=Pseudomonas aeruginosa (strain ATCC 15692 / PAO1 / 1C / PRS 101 / LMG 12228) GN=hpd PE=3 SV=1	1	1	1	1	4.2	4.2	4.2	39.912	357	357	0	21.651	11091000	3				129	445	TRUE	460	852;853	1034;1035;1036	1034
sp|Q9I589|CBPD_PSEAE	sp|Q9I589|CBPD_PSEAE	1	1	1	>sp|Q9I589|CBPD_PSEAE Chitin-binding protein CbpD OS=Pseudomonas aeruginosa (strain ATCC 15692 / PAO1 / 1C / PRS 101 / LMG 12228) GN=cbpD PE=1 SV=1	1	1	1	1	3.6	3.6	3.6	41.916	389	389	0	8.7077	12836000	2				130	75	TRUE	77	140;141	165;166	166
sp|Q9I5Y1|ALF_PSEAE	sp|Q9I5Y1|ALF_PSEAE	1	1	1	>sp|Q9I5Y1|ALF_PSEAE Fructose-bisphosphate aldolase OS=Pseudomonas aeruginosa (strain ATCC 15692 / PAO1 / 1C / PRS 101 / LMG 12228) GN=fba PE=3 SV=1	1	1	1	1	3.4	3.4	3.4	38.573	354	354	0	8.3196	6382500	2				131	167	TRUE	176	318;319	375;376	376
sp|Q9I5Z0|METK_PSEAE	sp|Q9I5Z0|METK_PSEAE	2	2	2	>sp|Q9I5Z0|METK_PSEAE S-adenosylmethionine synthase OS=Pseudomonas aeruginosa (strain ATCC 15692 / PAO1 / 1C / PRS 101 / LMG 12228) GN=metK PE=3 SV=1	1	2	2	2	4.8	4.8	4.8	42.709	396	396	0	13.273	6867800	1				132	112;453	True;True	116;468	210;866	248;1049	248;1049
sp|Q9I636|MASZ_PSEAE	sp|Q9I636|MASZ_PSEAE	1	1	1	>sp|Q9I636|MASZ_PSEAE Malate synthase G OS=Pseudomonas aeruginosa (strain ATCC 15692 / PAO1 / 1C / PRS 101 / LMG 12228) GN=glcB PE=3 SV=1	1	1	1	1	1.2	1.2	1.2	78.659	725	725	0	6.4602	2809000	1				133	612	TRUE	634	1209	1483	1483
sp|Q9I685|SAHH_PSEAE	sp|Q9I685|SAHH_PSEAE	7	7	7	>sp|Q9I685|SAHH_PSEAE Adenosylhomocysteinase OS=Pseudomonas aeruginosa (strain ATCC 15692 / PAO1 / 1C / PRS 101 / LMG 12228) GN=ahcY PE=3 SV=1	1	7	7	7	18.3	18.3	18.3	51.399	469	469	0	62.957	122430000	14				134	264;314;405;414;448;655;694	True;True;True;True;True;True;True	273;326;418;427;463;677;717	478;479;480;583;742;758;759;858;1290;1291;1365;1366	566;567;568;700;875;900;901;1041;1577;1578;1579;1580;1673;1674	567;700;875;901;1041;1578;1673
sp|Q9I6F1|TYSY_PSEAE	sp|Q9I6F1|TYSY_PSEAE	1	1	1	>sp|Q9I6F1|TYSY_PSEAE Thymidylate synthase OS=Pseudomonas aeruginosa (strain ATCC 15692 / PAO1 / 1C / PRS 101 / LMG 12228) GN=thyA PE=3 SV=1	1	1	1	1	3.4	3.4	3.4	30.016	264	264	1	-2	390680	1	+			135	423	TRUE	437	773	917	917	37	8
sp|Q9I6M4|DAVT_PSEAE	sp|Q9I6M4|DAVT_PSEAE	5	5	5	>sp|Q9I6M4|DAVT_PSEAE 5-aminovalerate aminotransferase DavT OS=Pseudomonas aeruginosa (strain ATCC 15692 / PAO1 / 1C / PRS 101 / LMG 12228) GN=davT PE=1 SV=1	1	5	5	5	15.7	15.7	15.7	45.22	426	426	0	39.418	47718000	8				136	25;38;227;557;580	True;True;True;True;True	25;39;236;578;601	41;42;68;69;70;415;1108;1109;1147	48;49;80;81;82;494;1358;1359;1411	49;82;494;1359;1411
sp|Q9I6M5|DAVD_PSEAE	sp|Q9I6M5|DAVD_PSEAE	3	3	3	>sp|Q9I6M5|DAVD_PSEAE Glutarate-semialdehyde dehydrogenase DavD OS=Pseudomonas aeruginosa (strain ATCC 15692 / PAO1 / 1C / PRS 101 / LMG 12228) GN=davD PE=1 SV=1	1	3	3	3	7.9	7.9	7.9	51.622	483	483	0	26.043	23627000	6				137	108;613;653	True;True;True	112;635;675	203;204;1210;1211;1286;1287	241;242;1484;1485;1573;1574	242;1484;1573
sp|Q9I747|HCP1_PSEAE	sp|Q9I747|HCP1_PSEAE	3	3	3	>sp|Q9I747|HCP1_PSEAE Protein hcp1 OS=Pseudomonas aeruginosa (strain ATCC 15692 / PAO1 / 1C / PRS 101 / LMG 12228) GN=hcp1 PE=1 SV=1	1	3	3	3	21	21	21	17.414	162	162	0	31.417	52123000	6				138	92;153;654	True;True;True	96;161;676	177;178;294;295;1288;1289	209;210;350;351;1575;1576	209;351;1575
sp|Q9I7C2|GYRB_PSEAE	sp|Q9I7C2|GYRB_PSEAE	1	1	1	>sp|Q9I7C2|GYRB_PSEAE DNA gyrase subunit B OS=Pseudomonas aeruginosa (strain ATCC 15692 / PAO1 / 1C / PRS 101 / LMG 12228) GN=gyrB PE=3 SV=1	1	1	1	1	1.7	1.7	1.7	90.188	806	806	0	8.611	2647500	2				139	705	TRUE	728	1397;1398	1729;1730	1729
sp|Q9X2T1|THIO_PSEAE	sp|Q9X2T1|THIO_PSEAE	2	2	2	>sp|Q9X2T1|THIO_PSEAE Thioredoxin OS=Pseudomonas aeruginosa (strain ATCC 15692 / PAO1 / 1C / PRS 101 / LMG 12228) GN=trxA PE=3 SV=1	1	2	2	2	21.3	21.3	21.3	11.87	108	108	0	16.077	28979000	3				140	379;422	True;True	392;435;436	700;701;771;772	832;833;915;916	832;915	38	38
sp|Q9XCL6|SYE_PSEAE	sp|Q9XCL6|SYE_PSEAE	1	1	1	>sp|Q9XCL6|SYE_PSEAE Glutamate--tRNA ligase OS=Pseudomonas aeruginosa (strain ATCC 15692 / PAO1 / 1C / PRS 101 / LMG 12228) GN=gltX PE=3 SV=2	1	1	1	1	2.4	2.4	2.4	56.749	494	494	0	6.9746	2270200	1				141	671	TRUE	693	1318	1612	1612
tr|G3XCT6|G3XCT6_PSEAE	tr|G3XCT6|G3XCT6_PSEAE	1	1	1	>tr|G3XCT6|G3XCT6_PSEAE Probable two-component sensor OS=Pseudomonas aeruginosa (strain ATCC 15692 / PAO1 / 1C / PRS 101 / LMG 12228) GN=PA1458 PE=4 SV=1	1	1	1	1	2.3	2.3	2.3	79.737	753	753	0	6.9853	6267100	2				142	478	TRUE	496	926;927	1121;1122	1121
tr|G3XD11|G3XD11_PSEAE	tr|G3XD11|G3XD11_PSEAE	3	3	3	>tr|G3XD11|G3XD11_PSEAE PhoP/Q and low Mg2+ inducible outer membrane protein H1 OS=Pseudomonas aeruginosa (strain ATCC 15692 / PAO1 / 1C / PRS 101 / LMG 12228) GN=oprH PE=4 SV=1	1	3	3	3	19	19	19	21.574	200	200	0	81.577	151390000	10				143	344;633;719	True;True;True	356;655;742	630;631;1247;1248;1422;1423	753;754;755;1526;1527;1528;1529;1758;1759;1760;1761	754;1526;1760
tr|Q9HTD1|Q9HTD1_PSEAE	tr|Q9HTD1|Q9HTD1_PSEAE	8	8	8	>tr|Q9HTD1|Q9HTD1_PSEAE Probable transcarboxylase subunit OS=Pseudomonas aeruginosa (strain ATCC 15692 / PAO1 / 1C / PRS 101 / LMG 12228) GN=PA5435 PE=4 SV=1	1	8	8	8	15.5	15.5	15.5	66.095	607	607	0	69.789	118960000	16				144	9;62;67;120;135;251;420;609	True;True;True;True;True;True;True;True	9;63;69;125;142;260;433;631	15;16;117;118;126;127;223;224;258;259;456;457;767;768;1204	19;20;142;143;151;152;264;265;266;310;311;544;545;910;911;1476	19;142;151;265;311;544;911;1476
tr|Q9HTD9|Q9HTD9_PSEAE	tr|Q9HTD9|Q9HTD9_PSEAE	4	4	4	>tr|Q9HTD9|Q9HTD9_PSEAE Alcohol dehydrogenase OS=Pseudomonas aeruginosa (strain ATCC 15692 / PAO1 / 1C / PRS 101 / LMG 12228) GN=adhA PE=1 SV=1	1	4	4	4	11.4	11.4	11.4	35.911	342	342	0	33.246	28462000	7				145	246;333;485;659	True;True;True;True	255;345;503;681	448;611;612;938;939;1298;1299	530;732;733;1133;1134;1587;1588	530;732;1133;1588
tr|Q9HTP2|Q9HTP2_PSEAE	tr|Q9HTP2|Q9HTP2_PSEAE	3	3	3	>tr|Q9HTP2|Q9HTP2_PSEAE Probable aldehyde dehydrogenase OS=Pseudomonas aeruginosa (strain ATCC 15692 / PAO1 / 1C / PRS 101 / LMG 12228) GN=PA5312 PE=3 SV=1	1	3	3	3	8.7	8.7	8.7	53.143	497	497	0	20.536	38241000	4				146	241;353;548	True;True;True	250;365;568	441;645;646;1067	523;769;770;1294	523;770;1294
tr|Q9HU11|Q9HU11_PSEAE	tr|Q9HU11|Q9HU11_PSEAE	4	4	4	>tr|Q9HU11|Q9HU11_PSEAE Uncharacterized protein OS=Pseudomonas aeruginosa (strain ATCC 15692 / PAO1 / 1C / PRS 101 / LMG 12228) GN=PA5178 PE=4 SV=1	1	4	4	4	29.7	29.7	29.7	15.46	145	145	0	40.226	21491000	7				147	278;305;631;632	True;True;True;True	289;317;653;654	515;569;570;1244;1245;1246	618;682;683;1522;1523;1524;1525	618;682;1523;1525
tr|Q9HUC3|Q9HUC3_PSEAE	tr|Q9HUC3|Q9HUC3_PSEAE	1	1	1	>tr|Q9HUC3|Q9HUC3_PSEAE Polyhydroxyalkanoate synthesis protein PhaF OS=Pseudomonas aeruginosa (strain ATCC 15692 / PAO1 / 1C / PRS 101 / LMG 12228) GN=phaF PE=4 SV=1	1	1	1	1	2.3	2.3	2.3	30.577	309	309	0	5.4552	11585000	2				148	343	TRUE	355	628;629	751;752	752
tr|Q9HUD3|Q9HUD3_PSEAE	tr|Q9HUD3|Q9HUD3_PSEAE	1	1	1	>tr|Q9HUD3|Q9HUD3_PSEAE Malic enzyme OS=Pseudomonas aeruginosa (strain ATCC 15692 / PAO1 / 1C / PRS 101 / LMG 12228) GN=PA5046 PE=3 SV=1	1	1	1	1	2.6	2.6	2.6	45.428	422	422	0	8.0952	10488000	2				149	359	TRUE	371	657;658	781;782	781
tr|Q9HUK6|Q9HUK6_PSEAE	tr|Q9HUK6|Q9HUK6_PSEAE	1	1	1	>tr|Q9HUK6|Q9HUK6_PSEAE FimX OS=Pseudomonas aeruginosa (strain ATCC 15692 / PAO1 / 1C / PRS 101 / LMG 12228) GN=fimX PE=1 SV=1	1	1	1	1	1	1	1	75.992	691	691	0.009434	5.3371	220420000	1				150	1	TRUE	1	4	4	4
tr|Q9HV54|Q9HV54_PSEAE	tr|Q9HV54|Q9HV54_PSEAE	1	1	1	>tr|Q9HV54|Q9HV54_PSEAE Transcription termination/antitermination protein NusA OS=Pseudomonas aeruginosa (strain ATCC 15692 / PAO1 / 1C / PRS 101 / LMG 12228) GN=nusA PE=3 SV=1	1	1	1	1	2.4	2.4	2.4	54.658	493	493	0	7.5237	3167900	1				151	663	TRUE	685	1305	1596	1596
tr|Q9HVJ1|Q9HVJ1_PSEAE	tr|Q9HVJ1|Q9HVJ1_PSEAE	2	2	2	>tr|Q9HVJ1|Q9HVJ1_PSEAE Probable ATP-binding component of ABC transporter OS=Pseudomonas aeruginosa (strain ATCC 15692 / PAO1 / 1C / PRS 101 / LMG 12228) GN=PA4595 PE=3 SV=1	1	2	2	2	4	4	4	61.32	554	554	0	12.293	10823000	3				152	115;263	True;True	119;272	215;476;477	254;564;565	254;565
tr|Q9HVY4|Q9HVY4_PSEAE	tr|Q9HVY4|Q9HVY4_PSEAE	2	2	2	>tr|Q9HVY4|Q9HVY4_PSEAE Ubiquinol-cytochrome c reductase iron-sulfur subunit OS=Pseudomonas aeruginosa (strain ATCC 15692 / PAO1 / 1C / PRS 101 / LMG 12228) GN=PA4431 PE=4 SV=1	1	2	2	2	11.7	11.7	11.7	20.828	197	197	0	12.355	11965000	3				153	2;80	True;True	2;83	5;6;150	5;6;177	6;177
tr|Q9HW32|Q9HW32_PSEAE	tr|Q9HW32|Q9HW32_PSEAE	1	1	1	>tr|Q9HW32|Q9HW32_PSEAE Insulin-cleaving metalloproteinase outer membrane protein OS=Pseudomonas aeruginosa (strain ATCC 15692 / PAO1 / 1C / PRS 101 / LMG 12228) GN=icmP PE=4 SV=1	1	1	1	1	5.4	5.4	5.4	47.23	446	446	0	6.0907	809900	1				154	311	TRUE	323	578	695	695
tr|Q9HW49|Q9HW49_PSEAE	tr|Q9HW49|Q9HW49_PSEAE	3	3	3	>tr|Q9HW49|Q9HW49_PSEAE Uncharacterized protein OS=Pseudomonas aeruginosa (strain ATCC 15692 / PAO1 / 1C / PRS 101 / LMG 12228) GN=PA4352 PE=4 SV=1	1	3	3	3	11.9	11.9	11.9	30.972	286	286	0	20.211	33561000	5				155	280;615;644	True;True;True	291;637;666	517;518;1214;1215;1269	620;621;1488;1489;1555	620;1489;1555
tr|Q9HW72|Q9HW72_PSEAE	tr|Q9HW72|Q9HW72_PSEAE	3	3	3	>tr|Q9HW72|Q9HW72_PSEAE Pyruvate kinase OS=Pseudomonas aeruginosa (strain ATCC 15692 / PAO1 / 1C / PRS 101 / LMG 12228) GN=pykA PE=3 SV=1	1	3	3	3	6.6	6.6	6.6	52.252	483	483	0	17.453	17882000	2				156	179;643;672	True;True;True	188;665;694	336;1267;1268;1319;1320	399;1553;1554;1613;1614	399;1554;1614
tr|Q9HW92|Q9HW92_PSEAE	tr|Q9HW92|Q9HW92_PSEAE	1	1	1	>tr|Q9HW92|Q9HW92_PSEAE Uncharacterized protein OS=Pseudomonas aeruginosa (strain ATCC 15692 / PAO1 / 1C / PRS 101 / LMG 12228) GN=PA4308 PE=4 SV=1	1	1	1	1	1.8	1.8	1.8	53.246	496	496	0	5.4618	0	1				157	141	TRUE	148	269	322	322
tr|Q9HWG9|Q9HWG9_PSEAE	tr|Q9HWG9|Q9HWG9_PSEAE	1	1	1	>tr|Q9HWG9|Q9HWG9_PSEAE Flavin-containing monooxygenase OS=Pseudomonas aeruginosa (strain ATCC 15692 / PAO1 / 1C / PRS 101 / LMG 12228) GN=phzS PE=1 SV=1	1	1	1	1	6.2	6.2	6.2	43.644	402	402	0	7.1561	12645000	2				158	110	TRUE	114	206;207	244;245	244
tr|Q9HWH2|Q9HWH2_PSEAE	tr|Q9HWH2|Q9HWH2_PSEAE	1	1	1	>tr|Q9HWH2|Q9HWH2_PSEAE Probable phenazine-specific methyltransferase OS=Pseudomonas aeruginosa (strain ATCC 15692 / PAO1 / 1C / PRS 101 / LMG 12228) GN=phzM PE=1 SV=1	1	1	1	1	4.2	4.2	4.2	36.357	334	334	0	6.4905	1503700	0				159	517	TRUE	536	1011	1224	1224
tr|Q9HWQ0|Q9HWQ0_PSEAE	tr|Q9HWQ0|Q9HWQ0_PSEAE	1	1	1	>tr|Q9HWQ0|Q9HWQ0_PSEAE Probable iron-sulfur protein OS=Pseudomonas aeruginosa (strain ATCC 15692 / PAO1 / 1C / PRS 101 / LMG 12228) GN=PA4131 PE=4 SV=1	1	1	1	1	2.8	2.8	2.8	63.991	573	573	0	11.308	11597000	2				160	287	TRUE	298	532;533	639;640	639
tr|Q9HWQ1|Q9HWQ1_PSEAE	tr|Q9HWQ1|Q9HWQ1_PSEAE	1	1	1	>tr|Q9HWQ1|Q9HWQ1_PSEAE Probable sulfite or nitrite reductase OS=Pseudomonas aeruginosa (strain ATCC 15692 / PAO1 / 1C / PRS 101 / LMG 12228) GN=PA4130 PE=4 SV=1	1	1	1	1	2.7	2.7	2.7	62.16	557	557	0	5.9587	26623000	1				161	506	TRUE	525	984;985;986	1192;1193;1194	1193
tr|Q9HWV0|Q9HWV0_PSEAE	tr|Q9HWV0|Q9HWV0_PSEAE	1	1	1	>tr|Q9HWV0|Q9HWV0_PSEAE Probable nonribosomal peptide synthetase OS=Pseudomonas aeruginosa (strain ATCC 15692 / PAO1 / 1C / PRS 101 / LMG 12228) GN=PA4078 PE=4 SV=1	1	1	1	1	1.2	1.2	1.2	110.35	991	991	0	9.7955	3391300	3				162	616	TRUE	638	1216;1217	1490;1491;1492	1492
tr|Q9HWW1|Q9HWW1_PSEAE	tr|Q9HWW1|Q9HWW1_PSEAE	6	6	6	>tr|Q9HWW1|Q9HWW1_PSEAE Outer membrane protein OprG OS=Pseudomonas aeruginosa (strain ATCC 15692 / PAO1 / 1C / PRS 101 / LMG 12228) GN=oprG PE=1 SV=1	1	6	6	6	29.3	29.3	29.3	25.193	232	232	0	80.729	338580000	21				163	32;81;192;193;207;689	True;True;True;True;True;True	32;84;201;202;216;712	57;58;151;152;357;358;359;360;361;384;385;1353;1354;1355;1356	65;66;67;68;178;179;422;423;424;425;426;427;428;457;458;1657;1658;1659;1660;1661;1662	66;178;422;426;457;1662
tr|Q9HX05|Q9HX05_PSEAE;tr|Q9I2C4|Q9I2C4_PSEAE	tr|Q9HX05|Q9HX05_PSEAE	3;1	3;1	3;1	>tr|Q9HX05|Q9HX05_PSEAE Probable aldehyde dehydrogenase OS=Pseudomonas aeruginosa (strain ATCC 15692 / PAO1 / 1C / PRS 101 / LMG 12228) GN=PA4022 PE=3 SV=1	2	3	3	3	8.5	8.5	8.5	54.979	506	506;506	0	19.493	34902000	4				164	46;240;697	True;True;True	47;249;720	86;439;440;1370	100;521;522;1680	100;522;1680
tr|Q9HX76|Q9HX76_PSEAE	tr|Q9HX76|Q9HX76_PSEAE	1	1	1	>tr|Q9HX76|Q9HX76_PSEAE Probable DNA binding protein OS=Pseudomonas aeruginosa (strain ATCC 15692 / PAO1 / 1C / PRS 101 / LMG 12228) GN=PA3940 PE=3 SV=1	1	1	1	1	11.8	11.8	11.8	9.8923	93	93	0	8.3431	6423800	3				165	510	TRUE	529	995;996	1205;1206;1207	1205
tr|Q9HXM5|Q9HXM5_PSEAE	tr|Q9HXM5|Q9HXM5_PSEAE	1	1	1	>tr|Q9HXM5|Q9HXM5_PSEAE Inosine-5-monophosphate dehydrogenase OS=Pseudomonas aeruginosa (strain ATCC 15692 / PAO1 / 1C / PRS 101 / LMG 12228) GN=guaB PE=1 SV=1	1	1	1	1	2.9	2.9	2.9	51.707	489	489	0	6.6429	358170	2				166	621	TRUE	643	1226;1227	1501;1502	1502
tr|Q9HXR8|Q9HXR8_PSEAE	tr|Q9HXR8|Q9HXR8_PSEAE	2	2	2	>tr|Q9HXR8|Q9HXR8_PSEAE Probable FMN oxidoreductase OS=Pseudomonas aeruginosa (strain ATCC 15692 / PAO1 / 1C / PRS 101 / LMG 12228) GN=PA3723 PE=4 SV=1	1	2	2	2	7.6	7.6	7.6	40.318	368	368	0	10.73	6910400	2				167	165;537	True;True	174;556	315;1048	372;1270	372;1270
tr|Q9HY12|Q9HY12_PSEAE	tr|Q9HY12|Q9HY12_PSEAE	1	1	1	>tr|Q9HY12|Q9HY12_PSEAE Uncharacterized protein OS=Pseudomonas aeruginosa (strain ATCC 15692 / PAO1 / 1C / PRS 101 / LMG 12228) GN=PA3614 PE=4 SV=1	1	1	1	1	1.9	1.9	1.9	51.921	467	467	0	6.3228	3818700	2				168	337	TRUE	349	618;619	739;740	739
tr|Q9HY13|Q9HY13_PSEAE	tr|Q9HY13|Q9HY13_PSEAE	3	3	3	>tr|Q9HY13|Q9HY13_PSEAE Uncharacterized protein OS=Pseudomonas aeruginosa (strain ATCC 15692 / PAO1 / 1C / PRS 101 / LMG 12228) GN=PA3613 PE=4 SV=1	1	3	3	3	4.7	4.7	4.7	88.378	801	801	0	22.951	19378000	4				169	334;567;629	True;True;True	346;588;651	613;1127;1128;1240;1241	734;1384;1385;1516;1517	734;1384;1517
tr|Q9HY77|Q9HY77_PSEAE	tr|Q9HY77|Q9HY77_PSEAE	2	2	2	>tr|Q9HY77|Q9HY77_PSEAE Glutaredoxin OS=Pseudomonas aeruginosa (strain ATCC 15692 / PAO1 / 1C / PRS 101 / LMG 12228) GN=PA3533 PE=3 SV=1	1	2	2	2	19.4	19.4	19.4	11.843	108	108	0	16.801	5528800	2				170	161;419	True;True	169;432	306;766	363;909	363;909
tr|Q9HY81|Q9HY81_PSEAE	tr|Q9HY81|Q9HY81_PSEAE	3	3	3	>tr|Q9HY81|Q9HY81_PSEAE Probable peroxidase OS=Pseudomonas aeruginosa (strain ATCC 15692 / PAO1 / 1C / PRS 101 / LMG 12228) GN=PA3529 PE=4 SV=1	1	3	3	3	15.5	15.5	15.5	21.822	200	200	0	27.946	86387000	8				171	100;465;549	True;True;True	104;480;569	190;191;896;897;1068;1069	226;227;1082;1083;1295;1296;1297;1298	226;1083;1297
tr|Q9HYR8|Q9HYR8_PSEAE	tr|Q9HYR8|Q9HYR8_PSEAE	2	2	2	>tr|Q9HYR8|Q9HYR8_PSEAE Probable non-ribosomal peptide synthetase OS=Pseudomonas aeruginosa (strain ATCC 15692 / PAO1 / 1C / PRS 101 / LMG 12228) GN=PA3327 PE=4 SV=1	1	2	2	2	0.9	0.9	0.9	259.4	2352	2352	0	11.489	2753400	1				172	276;684	True;True	287;707	512;1343	615;1643	615;1643
tr|Q9HYT5|Q9HYT5_PSEAE	tr|Q9HYT5|Q9HYT5_PSEAE	7	7	7	>tr|Q9HYT5|Q9HYT5_PSEAE Uncharacterized protein OS=Pseudomonas aeruginosa (strain ATCC 15692 / PAO1 / 1C / PRS 101 / LMG 12228) GN=PA3309 PE=4 SV=1	1	7	7	7	62.9	62.9	62.9	16.496	151	151	0	72.797	292860000	19				173	143;235;249;281;372;605;636	True;True;True;True;True;True;True	150;244;258;292;384;385;626;658	274;432;452;453;519;520;684;685;686;687;1193;1194;1253;1254	327;514;539;540;541;622;623;624;810;811;812;813;814;815;1462;1463;1464;1534;1535	327;514;540;624;815;1464;1534	39	129
tr|Q9HZK4|Q9HZK4_PSEAE	tr|Q9HZK4|Q9HZK4_PSEAE	2	2	2	>tr|Q9HZK4|Q9HZK4_PSEAE Glyceraldehyde-3-phosphate dehydrogenase OS=Pseudomonas aeruginosa (strain ATCC 15692 / PAO1 / 1C / PRS 101 / LMG 12228) GN=PA3001 PE=3 SV=1	1	2	2	2	4.1	4.1	4.1	50.111	461	461	0	12.237	26992000	3				174	21;347	True;True	21;359	35;635;636	42;759;760	42;760
tr|Q9I028|Q9I028_PSEAE	tr|Q9I028|Q9I028_PSEAE	1	1	1	>tr|Q9I028|Q9I028_PSEAE Probable acyl-CoA dehydrogenase OS=Pseudomonas aeruginosa (strain ATCC 15692 / PAO1 / 1C / PRS 101 / LMG 12228) GN=PA2815 PE=4 SV=1	1	1	1	1	2.1	2.1	2.1	88.762	815	815	0	5.7178	708340	1				175	124	TRUE	129	231	273	273
tr|Q9I0H1|Q9I0H1_PSEAE	tr|Q9I0H1|Q9I0H1_PSEAE	1	1	1	>tr|Q9I0H1|Q9I0H1_PSEAE Uncharacterized protein OS=Pseudomonas aeruginosa (strain ATCC 15692 / PAO1 / 1C / PRS 101 / LMG 12228) GN=PA2667 PE=4 SV=1	1	1	1	1	9.4	9.4	9.4	13.379	117	117	0	6.8874	620200	1				176	73	TRUE	75	137	162	162
tr|Q9I0L4|Q9I0L4_PSEAE	tr|Q9I0L4|Q9I0L4_PSEAE	4	4	4	>tr|Q9I0L4|Q9I0L4_PSEAE Isocitrate dehydrogenase OS=Pseudomonas aeruginosa (strain ATCC 15692 / PAO1 / 1C / PRS 101 / LMG 12228) GN=idh PE=4 SV=1	1	4	4	4	6.2	6.2	6.2	81.633	741	741	0	26.997	34505000	6				177	182;277;332;479	True;True;True;True	191;288;344;497	341;513;514;610;928;929	404;616;617;731;1123;1124	404;617;731;1123
tr|Q9I0L5|Q9I0L5_PSEAE	tr|Q9I0L5|Q9I0L5_PSEAE	11	11	11	>tr|Q9I0L5|Q9I0L5_PSEAE Isocitrate dehydrogenase [NADP] OS=Pseudomonas aeruginosa (strain ATCC 15692 / PAO1 / 1C / PRS 101 / LMG 12228) GN=icd PE=3 SV=1	1	11	11	11	28	28	28	45.577	418	418	0	79.568	230570000	19				178	59;87;132;174;178;214;236;295;315;598;688	True;True;True;True;True;True;True;True;True;True;True	60;90;137;183;187;223;245;306;327;619;711	111;112;165;166;248;249;330;335;393;394;433;434;548;549;584;1183;1351;1352	136;137;196;197;198;295;296;393;398;468;469;515;516;658;659;701;1452;1655;1656	136;198;296;393;398;469;516;659;701;1452;1656
tr|Q9I0T1|Q9I0T1_PSEAE	tr|Q9I0T1|Q9I0T1_PSEAE	2	2	2	>tr|Q9I0T1|Q9I0T1_PSEAE Probable acyl-CoA thiolase OS=Pseudomonas aeruginosa (strain ATCC 15692 / PAO1 / 1C / PRS 101 / LMG 12228) GN=PA2553 PE=3 SV=1	1	2	2	2	5.3	5.3	5.3	41.4	396	396	0	12.986	14951000	4				179	410;585	True;True	423;606	751;752;1159;1160	891;892;1425;1426	891;1426
tr|Q9I140|Q9I140_PSEAE	tr|Q9I140|Q9I140_PSEAE	1	1	1	>tr|Q9I140|Q9I140_PSEAE Aminomethyltransferase OS=Pseudomonas aeruginosa (strain ATCC 15692 / PAO1 / 1C / PRS 101 / LMG 12228) GN=gcvT2 PE=3 SV=1	1	1	1	1	3.2	3.2	3.2	39.882	373	373	0	5.6378	5944000	0				180	250	TRUE	259	454;455	542;543	543
tr|Q9I1E7|Q9I1E7_PSEAE	tr|Q9I1E7|Q9I1E7_PSEAE	1	1	1	>tr|Q9I1E7|Q9I1E7_PSEAE Alkyl hydroperoxide reductase AhpD OS=Pseudomonas aeruginosa (strain ATCC 15692 / PAO1 / 1C / PRS 101 / LMG 12228) GN=PA2331 PE=4 SV=1	1	1	1	1	5.4	5.4	5.4	19.904	186	186	0	6.8837	3721700	1				181	388	TRUE	401	713	846	846
tr|Q9I1H5|Q9I1H5_PSEAE	tr|Q9I1H5|Q9I1H5_PSEAE	3	3	3	>tr|Q9I1H5|Q9I1H5_PSEAE Chitinase OS=Pseudomonas aeruginosa (strain ATCC 15692 / PAO1 / 1C / PRS 101 / LMG 12228) GN=chiC PE=3 SV=1	1	3	3	3	6.2	6.2	6.2	53.042	483	483	0	19.25	34037000	5				182	243;483;608	True;True;True	252;501;630	444;445;935;1202;1203	526;527;1130;1474;1475	526;1130;1474
tr|Q9I1N7|Q9I1N7_PSEAE	tr|Q9I1N7|Q9I1N7_PSEAE	2	2	2	>tr|Q9I1N7|Q9I1N7_PSEAE PslB OS=Pseudomonas aeruginosa (strain ATCC 15692 / PAO1 / 1C / PRS 101 / LMG 12228) GN=pslB PE=3 SV=1	1	2	2	2	5.5	5.5	5.5	53.515	488	488	0	32.8	4430300	3				183	147;523	True;True	155;542	282;283;1020	335;336;1235	335;1235
tr|Q9I1U4|Q9I1U4_PSEAE	tr|Q9I1U4|Q9I1U4_PSEAE	1	1	1	>tr|Q9I1U4|Q9I1U4_PSEAE Uncharacterized protein OS=Pseudomonas aeruginosa (strain ATCC 15692 / PAO1 / 1C / PRS 101 / LMG 12228) GN=PA2171 PE=4 SV=1	1	1	1	1	6.4	6.4	6.4	18.098	156	156	1	-2	1861500	0	+			184	441	TRUE	456	805	954	954	40	69
tr|Q9I210|Q9I210_PSEAE	tr|Q9I210|Q9I210_PSEAE	1	1	1	>tr|Q9I210|Q9I210_PSEAE Probable acetyltransferase OS=Pseudomonas aeruginosa (strain ATCC 15692 / PAO1 / 1C / PRS 101 / LMG 12228) GN=PA2105 PE=4 SV=1	1	1	1	1	3.5	3.5	3.5	24.796	231	231	0	5.5415	9539300	0				185	403	TRUE	416	740	873	873	41	69
tr|Q9I246|Q9I246_PSEAE	tr|Q9I246|Q9I246_PSEAE	4	4	4	>tr|Q9I246|Q9I246_PSEAE Probable carbamoyl transferase OS=Pseudomonas aeruginosa (strain ATCC 15692 / PAO1 / 1C / PRS 101 / LMG 12228) GN=PA2069 PE=4 SV=1	1	4	4	4	9.2	9.2	9.2	63.382	574	574	0	28.47	35102000	6				186	302;370;524;528	True;True;True;True	313;382;543;547	563;564;680;681;1021;1022;1028;1029	676;677;806;807;1236;1237;1243;1244	676;807;1236;1244
tr|Q9I2A2|Q9I2A2_PSEAE	tr|Q9I2A2|Q9I2A2_PSEAE	1	1	1	>tr|Q9I2A2|Q9I2A2_PSEAE Fumarylacetoacetase OS=Pseudomonas aeruginosa (strain ATCC 15692 / PAO1 / 1C / PRS 101 / LMG 12228) GN=fahA PE=4 SV=1	1	1	1	1	2.5	2.5	2.5	46.341	432	432	0	11.77	6450900	1				187	168	TRUE	177	320	377	377
tr|Q9I2A9|Q9I2A9_PSEAE	tr|Q9I2A9|Q9I2A9_PSEAE	2	2	2	>tr|Q9I2A9|Q9I2A9_PSEAE DhcB, dehydrocarnitine CoA transferase, subunit B OS=Pseudomonas aeruginosa (strain ATCC 15692 / PAO1 / 1C / PRS 101 / LMG 12228) GN=dhcB PE=4 SV=1	1	2	2	2	11	11	11	23.187	218	218	0	13.373	15327000	3				188	68;360	True;True	70;372	128;659;660	153;783;784	153;784
tr|Q9I2V3|Q9I2V3_PSEAE	tr|Q9I2V3|Q9I2V3_PSEAE	1	1	1	>tr|Q9I2V3|Q9I2V3_PSEAE Uncharacterized protein OS=Pseudomonas aeruginosa (strain ATCC 15692 / PAO1 / 1C / PRS 101 / LMG 12228) GN=PA1789 PE=1 SV=1	1	1	1	1	5.2	5.2	5.2	31.273	287	287	0	5.6736	16927000	2				189	274	TRUE	285	508;509	609;610	609
tr|Q9I2W9|Q9I2W9_PSEAE	tr|Q9I2W9|Q9I2W9_PSEAE	5	5	5	>tr|Q9I2W9|Q9I2W9_PSEAE Phosphoenolpyruvate synthase OS=Pseudomonas aeruginosa (strain ATCC 15692 / PAO1 / 1C / PRS 101 / LMG 12228) GN=ppsA PE=3 SV=1	1	5	5	5	7.6	7.6	7.6	85.816	791	791	0	45.592	31035000	9				190	56;109;158;354;543	True;True;True;True;True	57;113;166;366;562	105;106;205;301;302;647;648;1057	127;128;129;130;243;357;358;771;772;1282	130;243;358;771;1282
tr|Q9I2Z1|Q9I2Z1_PSEAE	tr|Q9I2Z1|Q9I2Z1_PSEAE	1	1	1	>tr|Q9I2Z1|Q9I2Z1_PSEAE Uncharacterized protein OS=Pseudomonas aeruginosa (strain ATCC 15692 / PAO1 / 1C / PRS 101 / LMG 12228) GN=PA1746 PE=4 SV=1	1	1	1	1	6.5	6.5	6.5	18.189	168	168	0	7.7899	19952000	2				191	83	TRUE	86	155;156	183;184	183
tr|Q9I2Z5|Q9I2Z5_PSEAE	tr|Q9I2Z5|Q9I2Z5_PSEAE	1	1	1	>tr|Q9I2Z5|Q9I2Z5_PSEAE Probable amidotransferase OS=Pseudomonas aeruginosa (strain ATCC 15692 / PAO1 / 1C / PRS 101 / LMG 12228) GN=PA1742 PE=4 SV=1	1	1	1	1	5.8	5.8	5.8	27.361	240	240	0	9.7154	1248700	0				192	15	TRUE	15	25	29	29
tr|Q9I315|Q9I315_PSEAE	tr|Q9I315|Q9I315_PSEAE	1	1	1	>tr|Q9I315|Q9I315_PSEAE Type III export protein PscI OS=Pseudomonas aeruginosa (strain ATCC 15692 / PAO1 / 1C / PRS 101 / LMG 12228) GN=pscI PE=4 SV=1	1	1	1	1	8.9	8.9	8.9	12.173	112	112	0	5.528	24696000	2				193	304	TRUE	315;316	567;568	680;681	680	42	89
tr|Q9I3D3|Q9I3D3_PSEAE	tr|Q9I3D3|Q9I3D3_PSEAE	4	4	4	>tr|Q9I3D3|Q9I3D3_PSEAE 2-oxoglutarate dehydrogenase (E1 subunit) OS=Pseudomonas aeruginosa (strain ATCC 15692 / PAO1 / 1C / PRS 101 / LMG 12228) GN=sucA PE=4 SV=1	1	4	4	4	5.1	5.1	5.1	105.88	943	943	0	47.902	29756000	6				194	209;383;384;425	True;True;True;True	218;396;397;439	388;705;706;707;776;777	463;837;838;839;920;921	463;838;839;921
tr|Q9I3D4|Q9I3D4_PSEAE	tr|Q9I3D4|Q9I3D4_PSEAE	3	3	3	>tr|Q9I3D4|Q9I3D4_PSEAE Succinate dehydrogenase (B subunit) OS=Pseudomonas aeruginosa (strain ATCC 15692 / PAO1 / 1C / PRS 101 / LMG 12228) GN=sdhB PE=4 SV=1	1	3	3	3	17.4	17.4	17.4	26.155	235	235	0	20.493	36975000	7				195	329;412;638	True;True;True	341;425;660	605;606;755;756;1257;1258	725;726;727;897;898;1540;1541	726;897;1541
tr|Q9I3D5|Q9I3D5_PSEAE	tr|Q9I3D5|Q9I3D5_PSEAE	4	4	4	>tr|Q9I3D5|Q9I3D5_PSEAE Succinate dehydrogenase flavoprotein subunit OS=Pseudomonas aeruginosa (strain ATCC 15692 / PAO1 / 1C / PRS 101 / LMG 12228) GN=sdhA PE=3 SV=1	1	4	4	4	8	8	8	63.531	590	590	0	28.192	41478000	5				196	97;183;201;570	True;True;True;True	101;192;210;591	185;342;343;374;375;1132	220;405;406;446;447;1389	220;405;446;1389
tr|Q9I3G1|Q9I3G1_PSEAE;tr|Q9I3G4|Q9I3G4_PSEAE	tr|Q9I3G1|Q9I3G1_PSEAE;tr|Q9I3G4|Q9I3G4_PSEAE	1;1	1;1	1;1	>tr|Q9I3G1|Q9I3G1_PSEAE Cytochrome c oxidase, cbb3-type, CcoO subunit OS=Pseudomonas aeruginosa (strain ATCC 15692 / PAO1 / 1C / PRS 101 / LMG 12228) GN=ccoO2 PE=4 SV=1;>tr|Q9I3G4|Q9I3G4_PSEAE Cytochrome c oxidase, cbb3-type, CcoO subunit OS=Pseudomonas ae	2	1	1	1	5.4	5.4	5.4	22.778	202	202;203	0	8.2826	8104700	2				197	431	TRUE	446	788;789	932;933	932
tr|Q9I3H0|Q9I3H0_PSEAE	tr|Q9I3H0|Q9I3H0_PSEAE	1	1	1	>tr|Q9I3H0|Q9I3H0_PSEAE Uncharacterized protein OS=Pseudomonas aeruginosa (strain ATCC 15692 / PAO1 / 1C / PRS 101 / LMG 12228) GN=PA1547 PE=4 SV=1	1	1	1	1	4	4	4	24.054	227	227	0	5.5935	9302900	1				198	369	TRUE	381	679	805	805
tr|Q9I4I1|Q9I4I1_PSEAE	tr|Q9I4I1|Q9I4I1_PSEAE	2	2	2	>tr|Q9I4I1|Q9I4I1_PSEAE Ribonucleoside-diphosphate reductase OS=Pseudomonas aeruginosa (strain ATCC 15692 / PAO1 / 1C / PRS 101 / LMG 12228) GN=nrdA PE=3 SV=1	1	2	2	2	2.7	2.7	2.7	107.11	963	963	0	15.838	3100200	2				199	211;683	True;True	220;706	390;1342	465;1642	465;1642
tr|Q9I4Q9|Q9I4Q9_PSEAE	tr|Q9I4Q9|Q9I4Q9_PSEAE	1	1	1	>tr|Q9I4Q9|Q9I4Q9_PSEAE Uncharacterized protein OS=Pseudomonas aeruginosa (strain ATCC 15692 / PAO1 / 1C / PRS 101 / LMG 12228) GN=PA1065 PE=4 SV=1	1	1	1	1	9.6	9.6	9.6	17.989	157	157	0.0095694	5.3666	5608400	1				200	590	TRUE	611	1168	1437	1437	43	26
tr|Q9I4X1|Q9I4X1_PSEAE	tr|Q9I4X1|Q9I4X1_PSEAE	2	2	2	>tr|Q9I4X1|Q9I4X1_PSEAE PqsC OS=Pseudomonas aeruginosa (strain ATCC 15692 / PAO1 / 1C / PRS 101 / LMG 12228) GN=pqsC PE=4 SV=1	1	2	2	2	6.9	6.9	6.9	38.238	348	348	0	17.602	7238600	4				201	387;416	True;True	400;429	711;712;762	843;844;845;904	844;904
tr|Q9I4X2|Q9I4X2_PSEAE	tr|Q9I4X2|Q9I4X2_PSEAE	1	1	1	>tr|Q9I4X2|Q9I4X2_PSEAE PqsB OS=Pseudomonas aeruginosa (strain ATCC 15692 / PAO1 / 1C / PRS 101 / LMG 12228) GN=pqsB PE=4 SV=1	1	1	1	1	4.2	4.2	4.2	30.5	283	283	0	7.0581	3254000	1				202	324	TRUE	336	597	717	717
tr|Q9I5F6|Q9I5F6_PSEAE	tr|Q9I5F6|Q9I5F6_PSEAE	1	1	1	>tr|Q9I5F6|Q9I5F6_PSEAE Bifunctional protein PutA OS=Pseudomonas aeruginosa (strain ATCC 15692 / PAO1 / 1C / PRS 101 / LMG 12228) GN=putA PE=3 SV=1	1	1	1	1	1.4	1.4	1.4	115.63	1060	1060	0	6.883	15866000	2				203	661	TRUE	683	1301;1302	1590;1591	1591
tr|Q9I5I4|Q9I5I4_PSEAE	tr|Q9I5I4|Q9I5I4_PSEAE	1	1	1	>tr|Q9I5I4|Q9I5I4_PSEAE Probable enoyl-CoA hydratase/isomerase OS=Pseudomonas aeruginosa (strain ATCC 15692 / PAO1 / 1C / PRS 101 / LMG 12228) GN=PA0745 PE=3 SV=1	1	1	1	1	4	4	4	29.904	272	272	0	7.4092	9951300	0				204	180	TRUE	189	337;338	400;401	401
tr|Q9I5I5|Q9I5I5_PSEAE	tr|Q9I5I5|Q9I5I5_PSEAE	2	2	2	>tr|Q9I5I5|Q9I5I5_PSEAE Probable enoyl-CoA hydratase/isomerase OS=Pseudomonas aeruginosa (strain ATCC 15692 / PAO1 / 1C / PRS 101 / LMG 12228) GN=PA0744 PE=4 SV=1	1	2	2	2	5.2	5.2	5.2	40.589	367	367	0	12.254	6420700	3				205	255;713	True;True	264;736	463;1411;1412	551;1747;1748	551;1748
tr|Q9I5U9|Q9I5U9_PSEAE	tr|Q9I5U9|Q9I5U9_PSEAE	12	12	12	>tr|Q9I5U9|Q9I5U9_PSEAE Uncharacterized protein OS=Pseudomonas aeruginosa (strain ATCC 15692 / PAO1 / 1C / PRS 101 / LMG 12228) GN=PA0588 PE=4 SV=1	1	12	12	12	20.5	20.5	20.5	73.722	640	640	0	106.2	181280000	23				206	5;126;248;361;371;376;417;447;470;527;569;656	True;True;True;True;True;True;True;True;True;True;True;True	5;131;257;373;383;389;430;462;488;546;590;678	9;233;451;661;662;663;664;682;683;694;695;763;764;856;857;913;914;1027;1130;1131;1292;1293	9;275;538;785;786;787;788;808;809;824;825;905;906;907;1039;1040;1107;1108;1242;1387;1388;1581;1582	9;275;538;786;809;825;905;1039;1108;1242;1388;1582	44	412
tr|Q9I5Y8|Q9I5Y8_PSEAE	tr|Q9I5Y8|Q9I5Y8_PSEAE	1	1	1	>tr|Q9I5Y8|Q9I5Y8_PSEAE Transketolase OS=Pseudomonas aeruginosa (strain ATCC 15692 / PAO1 / 1C / PRS 101 / LMG 12228) GN=tktA PE=1 SV=1	1	1	1	1	2.6	2.6	2.6	72.219	665	665	0	7.8775	4529800	1				207	156	TRUE	164	299	355	355
tr|Q9I671|Q9I671_PSEAE	tr|Q9I671|Q9I671_PSEAE	3	3	3	>tr|Q9I671|Q9I671_PSEAE Glutaryl-CoA dehydrogenase OS=Pseudomonas aeruginosa (strain ATCC 15692 / PAO1 / 1C / PRS 101 / LMG 12228) GN=gcdH PE=3 SV=1	1	3	3	3	9.7	9.7	9.7	43.311	393	393	0	23.324	39368000	7				208	76;122;231	True;True;True	78;127;240	142;226;420;421;422;423	167;268;499;500;501;502;503;504	167;268;503
tr|Q9I688|Q9I688_PSEAE	tr|Q9I688|Q9I688_PSEAE	1	1	1	>tr|Q9I688|Q9I688_PSEAE Uncharacterized protein OS=Pseudomonas aeruginosa (strain ATCC 15692 / PAO1 / 1C / PRS 101 / LMG 12228) GN=PA0429 PE=4 SV=1	1	1	1	1	2	2	2	40.872	356	356	0	6.1569	50512000	0				209	674	TRUE	696	1323;1324;1325	1617;1618;1619	1619
tr|Q9I689|Q9I689_PSEAE	tr|Q9I689|Q9I689_PSEAE	1	1	1	>tr|Q9I689|Q9I689_PSEAE ATP-dependent RNA helicase RhlE OS=Pseudomonas aeruginosa (strain ATCC 15692 / PAO1 / 1C / PRS 101 / LMG 12228) GN=rhlE PE=3 SV=1	1	1	1	1	3.8	3.8	3.8	70.111	639	639	0	5.604	405180	1				210	106	TRUE	110	200	238	238
tr|Q9I6H5|Q9I6H5_PSEAE	tr|Q9I6H5|Q9I6H5_PSEAE	2	2	2	>tr|Q9I6H5|Q9I6H5_PSEAE D-3-phosphoglycerate dehydrogenase OS=Pseudomonas aeruginosa (strain ATCC 15692 / PAO1 / 1C / PRS 101 / LMG 12228) GN=serA PE=3 SV=1	1	2	2	2	6.4	6.4	6.4	44.216	409	409	0	12.154	23110000	6				211	172;239	True;True	181;248	326;327;437;438	387;388;389;390;519;520	389;520
tr|Q9I6Z3|Q9I6Z3_PSEAE	tr|Q9I6Z3|Q9I6Z3_PSEAE	8	8	8	>tr|Q9I6Z3|Q9I6Z3_PSEAE Alkyl hydroperoxide reductase subunit C OS=Pseudomonas aeruginosa (strain ATCC 15692 / PAO1 / 1C / PRS 101 / LMG 12228) GN=ahpC PE=4 SV=1	1	8	8	8	44.9	44.9	44.9	20.541	187	187	0	62.084	266860000	20				212	31;166;221;534;575;576;596;685	True;True;True;True;True;True;True;True	31;175;230;553;596;597;617;708	53;54;55;56;316;317;405;406;1042;1043;1138;1139;1140;1178;1179;1180;1181;1344;1345;1346	61;62;63;64;373;374;483;484;1262;1263;1395;1396;1397;1447;1448;1449;1450;1644;1645;1646	63;373;483;1262;1395;1397;1448;1646
tr|Q9I710|Q9I710_PSEAE	tr|Q9I710|Q9I710_PSEAE	1	1	1	>tr|Q9I710|Q9I710_PSEAE Uncharacterized protein OS=Pseudomonas aeruginosa (strain ATCC 15692 / PAO1 / 1C / PRS 101 / LMG 12228) GN=PA0122 PE=4 SV=1	1	1	1	1	8.1	8.1	8.1	14.579	136	136	0	6.7523	2003200	3				213	421	TRUE	434	769;770	912;913;914	912
tr|Q9I745|Q9I745_PSEAE	tr|Q9I745|Q9I745_PSEAE	1	1	1	>tr|Q9I745|Q9I745_PSEAE Uncharacterized protein OS=Pseudomonas aeruginosa (strain ATCC 15692 / PAO1 / 1C / PRS 101 / LMG 12228) GN=PA0087 PE=4 SV=1	1	1	1	1	4.7	4.7	4.7	18.693	169	169	0	5.5341	6527300	1				214	23	TRUE	23	38	45	45
tr|Q9I762|Q9I762_PSEAE	tr|Q9I762|Q9I762_PSEAE	1	1	1	>tr|Q9I762|Q9I762_PSEAE Uncharacterized protein OS=Pseudomonas aeruginosa (strain ATCC 15692 / PAO1 / 1C / PRS 101 / LMG 12228) GN=PA0070 PE=4 SV=1	1	1	1	1	3.3	3.3	3.3	31.716	304	304	0	5.7075	0	2				215	260	TRUE	269	472;473	560;561	560

## Sheet: 1-2 proteinGroups Probe 12
Protein IDs	Majority protein IDs	Peptide counts (all)	Peptide counts (razor+unique)	Peptide counts (unique)	Fasta headers	Number of proteins	Peptides	Razor + unique peptides	Unique peptides	Sequence coverage [%]	Unique + razor sequence coverage [%]	Unique sequence coverage [%]	Mol. weight [kDa]	Sequence length	Sequence lengths	Q-value	Score	Intensity	MS/MS Count	Only identified by site	Reverse	Potential contaminant	id	Peptide IDs	Peptide is razor	Mod. peptide IDs	Evidence IDs	MS/MS IDs	Best MS/MS	Oxidation (M) site IDs	Oxidation (M) site positions
CON__A2A4G1;CON__P19001;CON__P35900;CON__Q9D312;CON__Q8N1A0;CON__Q14525;CON__Q9UE12;CON__Q15323;CON__A2A5Y0;CON__P05784;CON__Q92764;CON__Q14532;CON__A2AB72;CON__Q497I4;CON__O76015;CON__O76013;CON__Q7Z3Y9;CON__O76014;CON__REFSEQ:XP_986630	CON__A2A4G1;CON__P19001	6;3;2;2;1;1;1;1;1;1;1;1;1;1;1;1;1;1;1	1;0;0;0;0;0;0;0;0;0;0;0;0;0;0;0;0;0;0	1;0;0;0;0;0;0;0;0;0;0;0;0;0;0;0;0;0;0	>A2A4G1 TREMBL:A2A4G1 Tax_Id=10090 Gene_Symbol=Krt15 Keratin complex 1, acidic, gene 15;>P19001 SWISS-PROT:P19001 Tax_Id=10090 Gene_Symbol=Krt19 Keratin, type I cytoskeletal 19	19	6	1	1	10.1	2.2	2.2	49.493	456	456;403;424;431;295;404;416;416;416;423;425;448;453;455;456;467;468;471;476	1	-2	1629800	1	+		+	0	345;396;424;721;787;828	True;False;False;False;False;False	358;409;437;746;817;858;859	684;775;776;824;825;1482;1483;1609;1687;1688;1689;1690	789;897;898;899;900;956;957;1817;1818;1972;1973;2064;2065;2066;2067;2068;2069;2070;2071	789;898;956;1817;1972;2070	0	102
CON__P00761	CON__P00761	3	3	3	>P00761 SWISS-PROT:P00761|TRYP_PIG Trypsin - Sus scrofa (Pig).	1	3	3	3	20.8	20.8	20.8	24.409	231	231	0	32.546	12133000000	36			+	1	340;432;743	True;True;True	351;352;445;771	667;668;669;670;671;839;840;841;842;1523;1524;1525;1526;1527	763;764;765;766;767;768;769;770;771;772;773;774;775;973;974;975;976;977;978;979;1860;1861;1862;1863;1864;1865;1866;1867;1868;1869;1870;1871;1872;1873;1874;1875;1876	765;973;1871	1	94
CON__P02533;CON__Q6IFX2;CON__Q04695;CON__Q9QWL7;CON__P19012;CON__P08727;CON__Q61782	CON__P02533;CON__Q6IFX2	13;7;6;6;5;4;3	11;6;5;5;4;3;3	5;2;1;2;0;1;1	>P02533 SWISS-PROT:P02533 Tax_Id=9606 Gene_Symbol=KRT14 Keratin, type I cytoskeletal 14;>Q6IFX2 SWISS-PROT:Q6IFX2 Tax_Id=10090 Gene_Symbol=Krt42 Keratin, type I cytoskeletal 42	7	13	11	5	28.8	25.4	14.8	51.621	472	472;452;432;433;456;400;93	0	102.55	442200000	25			+	2	57;84;96;117;174;371;396;424;456;545;721;787;828	True;True;True;True;True;True;False;True;True;True;True;True;False	58;86;98;121;183;384;409;437;469;561;746;817;858;859	114;115;168;169;191;192;233;234;352;353;731;732;775;776;824;825;892;893;1052;1482;1483;1609;1687;1688;1689;1690	131;132;193;194;219;220;221;222;223;271;272;411;412;847;848;897;898;899;900;956;957;1038;1039;1040;1222;1817;1818;1972;1973;2064;2065;2066;2067;2068;2069;2070;2071	131;193;222;272;411;848;898;956;1039;1222;1817;1972;2070	0;2	119;212
CON__P02538;CON__P48668;CON__P04259;CON__Q8VED5	CON__P02538;CON__P48668;CON__P04259	12;11;11;4	5;4;4;0	3;2;2;0	>P02538 SWISS-PROT:P02538 Tax_Id=9606 Gene_Symbol=KRT6A Keratin, type II cytoskeletal 6A;>P48668 SWISS-PROT:P48668 Tax_Id=9606 Gene_Symbol=KRT6C Keratin, type II cytoskeletal 6C;>P04259 SWISS-PROT:P04259 Tax_Id=9606 Gene_Symbol=KRT6B Keratin, type II cytos	4	12	5	3	18.1	8	6	60.044	564	564;564;564;531	0	36.473	66648000	7			+	3	19;90;181;266;418;565;569;571;613;685;853;861	True;False;False;True;True;True;False;False;False;True;False;False	19;92;190;276;431;583;587;589;635;710;884;892	36;37;179;180;365;366;523;524;816;1131;1132;1146;1147;1148;1149;1150;1151;1155;1244;1415;1416;1736;1737;1762;1763	41;42;204;205;206;207;424;425;605;606;947;1370;1371;1385;1386;1387;1388;1389;1390;1391;1392;1393;1394;1399;1510;1739;1740;2125;2126;2160;2161	42;207;424;606;947;1371;1387;1399;1510;1739;2125;2160	3	242
CON__P04264;CON__H-INV:HIT000016045	CON__P04264	25;2	25;2	14;0	>P04264 SWISS-PROT:P04264 Tax_Id=9606 Gene_Symbol=KRT1 Keratin, type II cytoskeletal 1	2	25	25	14	36.8	36.8	23.8	66.017	644	644;99	0	323.31	10509000000	127			+	4	22;142;149;198;238;317;404;466;496;497;566;569;580;610;638;649;652;659;660;708;713;714;847;861;862	True;True;True;True;True;True;True;True;True;True;True;True;True;True;True;True;True;True;True;True;True;True;True;True;True	22;147;154;155;208;248;327;417;480;510;511;584;587;600;601;602;632;661;672;675;682;683;733;738;739;878;892;893	41;42;284;285;286;297;298;299;300;399;400;401;473;474;475;621;622;789;790;912;913;914;964;965;966;967;968;1133;1134;1135;1136;1146;1147;1148;1149;1150;1151;1177;1178;1179;1180;1181;1182;1183;1184;1238;1239;1296;1297;1320;1321;1327;1338;1339;1340;1341;1455;1456;1464;1465;1466;1467;1468;1469;1470;1724;1725;1762;1763;1764;1765	46;47;48;49;330;331;332;333;346;347;348;349;350;351;352;353;459;460;461;462;463;464;542;543;544;545;546;709;710;711;712;713;714;715;716;917;918;1065;1066;1067;1068;1069;1125;1126;1127;1128;1129;1372;1373;1374;1375;1385;1386;1387;1388;1389;1390;1391;1392;1393;1394;1423;1424;1425;1426;1427;1428;1429;1430;1431;1432;1433;1434;1435;1436;1437;1501;1502;1503;1504;1575;1576;1577;1578;1601;1602;1608;1609;…	48;332;346;461;546;714;917;1066;1125;1128;1373;1387;1433;1503;1578;1601;1610;1624;1630;1786;1798;1800;2108;2160;2164	4;5;6	259;262;469
CON__P08779	CON__P08779	12	4	4	>P08779 SWISS-PROT:P08779 Tax_Id=9606 Gene_Symbol=KRT16 Keratin, type I cytoskeletal 16	1	12	4	4	21.8	7.8	7.8	51.267	473	473	0	33.83	42662000	5			+	5	57;83;96;173;371;396;424;701;721;787;828;865	False;True;False;True;False;False;False;True;False;False;False;True	58;85;98;182;384;409;437;726;746;817;858;859;896	114;115;166;167;191;192;350;351;731;732;775;776;824;825;1442;1482;1483;1609;1687;1688;1689;1690;1770	131;132;191;192;219;220;221;222;223;409;410;847;848;897;898;899;900;956;957;1767;1817;1818;1972;1973;2064;2065;2066;2067;2068;2069;2070;2071;2176	131;192;222;409;848;898;956;1767;1817;1972;2070;2176	0	121
CON__P13645;CON__P02535-1;CON__Q148H6;CON__Q7Z3Y7;CON__Q7Z3Z0;CON__Q7Z3Y8;CON__Q2M2I5	CON__P13645	24;10;3;3;2;2;2	24;10;3;3;2;2;2	20;6;1;1;1;1;0	>P13645 SWISS-PROT:P13645 Tax_Id=9606 Gene_Symbol=KRT10 Keratin, type I cytoskeletal 10	7	24	24	20	35.1	35.1	30.5	59.51	593	593;570;464;486;450;459;525	0	295.69	7229200000	94			+	6	58;116;167;275;343;372;396;422;453;561;590;619;620;621;628;631;632;651;657;673;674;789;828;866	True;True;True;True;True;True;True;True;True;True;True;True;True;True;True;True;True;True;True;True;True;True;True;True	59;120;175;285;355;385;409;435;466;579;612;641;642;643;651;654;655;674;680;697;698;819;858;859;897	116;117;231;232;338;339;538;539;674;675;733;734;735;736;775;776;822;885;886;887;1125;1126;1202;1203;1253;1254;1255;1256;1257;1258;1274;1275;1279;1280;1281;1282;1283;1284;1326;1334;1335;1366;1367;1368;1369;1611;1612;1687;1688;1689;1690;1771;1772	133;134;135;136;137;138;139;267;268;269;270;392;393;394;395;620;621;622;623;778;779;849;850;851;852;853;854;855;856;897;898;899;900;953;954;1027;1028;1029;1030;1031;1032;1033;1364;1365;1459;1460;1461;1521;1522;1523;1524;1525;1526;1527;1528;1529;1530;1550;1551;1555;1556;1557;1558;1559;1560;1607;1617;1618;1619;1660;1661;1662;1663;1664;1665;1666;1667;1668;1975;1976;1977;1978;2064;2065;2066;2067;2068…	138;270;392;623;778;849;898;954;1027;1365;1461;1522;1527;1529;1551;1555;1558;1607;1618;1660;1664;1976;2070;2181	0;7;8	150;306;321
CON__P13647	CON__P13647	13	9	3	>P13647 SWISS-PROT:P13647 Tax_Id=9606 Gene_Symbol=KRT5 Keratin, type II cytoskeletal 5	1	13	9	3	20.5	15.6	5.1	62.378	590	590	0	76.731	389700000	22			+	7	89;181;374;399;569;571;579;613;725;744;853;861;863	True;False;True;True;False;False;True;True;True;True;True;False;True	91;190;387;412;587;589;598;599;635;751;752;772;773;884;892;894	177;178;365;366;739;740;781;782;1146;1147;1148;1149;1150;1151;1155;1174;1175;1176;1244;1491;1492;1493;1528;1529;1530;1531;1736;1737;1762;1763;1766;1767	202;203;424;425;859;860;909;910;1385;1386;1387;1388;1389;1390;1391;1392;1393;1394;1399;1420;1421;1422;1510;1828;1829;1830;1877;1878;1879;1880;1881;2125;2126;2160;2161;2169;2170	203;424;859;910;1387;1399;1421;1510;1829;1879;2125;2160;2170	9;10;11;12	247;274;297;303
CON__P35527	CON__P35527	19	19	19	>P35527 SWISS-PROT:P35527 Tax_Id=9606 Gene_Symbol=KRT9 Keratin, type I cytoskeletal 9	1	19	19	19	41.1	41.1	41.1	62.129	623	623	0	211.17	2585700000	82			+	8	159;188;208;239;243;244;292;344;368;369;546;607;608;622;639;677;707;710;815	True;True;True;True;True;True;True;True;True;True;True;True;True;True;True;True;True;True;True	166;197;198;218;249;253;254;302;356;357;381;382;562;563;629;630;644;645;662;701;732;735;845	318;319;320;321;378;379;380;381;420;421;476;481;482;483;484;571;572;573;574;676;677;678;679;680;681;682;683;724;725;726;727;728;729;1053;1054;1055;1056;1232;1233;1234;1235;1259;1260;1261;1298;1299;1397;1398;1453;1454;1459;1460;1660;1661;1662;1663	371;372;373;374;437;438;439;440;485;486;547;552;553;554;555;556;557;558;559;657;658;659;660;661;662;780;781;782;783;784;785;786;787;788;837;838;839;840;841;842;843;844;845;1223;1224;1225;1226;1227;1228;1229;1230;1231;1492;1493;1494;1495;1496;1497;1498;1531;1532;1533;1534;1579;1580;1714;1715;1716;1717;1779;1780;1781;1782;1790;1791;2032;2033;2034;2035;2036;2037;2038	372;438;486;547;554;559;661;783;838;844;1231;1494;1498;1531;1579;1715;1780;1791;2033	13;14;15;16;17	157;234;245;269;326
CON__P35908;CON__Q5XKE5;CON__O95678;CON__Q7Z794;CON__Q9R0H5;CON__P19013	CON__P35908	23;3;3;3;2;2	20;3;2;1;1;2	14;0;0;0;0;0	>P35908 SWISS-PROT:P35908 Tax_Id=9606 Gene_Symbol=KRT2 Keratin, type II cytoskeletal 2 epidermal	6	23	20	14	37.4	34.3	25	65.865	645	645;535;551;578;524;594	0	214.67	1937800000	63			+	9	90;143;150;181;198;231;242;276;317;395;491;567;571;589;650;683;684;722;723;747;861;864;873	True;True;True;True;False;True;True;True;False;True;True;True;True;True;True;True;True;True;True;True;False;True;True	92;148;156;157;190;208;241;252;286;327;408;505;585;589;611;673;708;709;747;748;749;776;892;895;904	179;180;287;288;301;302;303;304;365;366;399;400;401;458;459;479;480;540;541;621;622;773;774;953;954;955;1137;1138;1139;1140;1155;1200;1201;1322;1323;1324;1325;1411;1412;1413;1414;1484;1485;1486;1487;1488;1536;1537;1762;1763;1768;1769;1782;1783	204;205;206;207;334;335;354;355;356;357;424;425;459;460;461;462;463;464;525;526;527;528;550;551;624;625;626;709;710;711;712;713;714;715;716;895;896;1113;1114;1115;1376;1377;1378;1379;1399;1457;1458;1603;1604;1605;1606;1733;1734;1735;1736;1737;1738;1819;1820;1821;1822;1823;1824;1825;1886;1887;1888;1889;2160;2161;2171;2172;2173;2174;2175;2191;2192;2193;2194	207;334;354;424;461;525;551;624;714;895;1113;1378;1399;1458;1603;1734;1737;1819;1825;1887;2160;2171;2194	18;19;20	263;300;473
CON__Q14CN4-1;CON__Q6IME9;CON__Q3SY84;CON__Q7RTS7;CON__Q32MB2	CON__Q14CN4-1;CON__Q6IME9;CON__Q3SY84;CON__Q7RTS7;CON__Q32MB2	2;2;2;2;2	1;1;1;1;1	1;1;1;1;1	>Q14CN4-1 SWISS-PROT:Q14CN4-1 Tax_Id=9606 Gene_Symbol=KRT72 Isoform 1 of Keratin, type II cytoskeletal 72;>Q6IME9 TREMBL:Q6IME9 Tax_Id=10090 Gene_Symbol=Krt72 Type-II keratin Kb35;>Q3SY84 SWISS-PROT:Q3SY84 Tax_Id=9606 Gene_Symbol=KRT71 Keratin, type II cyt	5	2	1	1	3.7	2.3	2.3	55.877	511	511;520;523;529;540	0	13.749	21074000	3			+	10	181;197	False;True	190;207	365;366;397;398	424;425;456;457;458	424;456
CON__Q2YDI2	CON__Q2YDI2	1	1	1	>Q2YDI2 SWISS-PROT:Q2YDI2 (Bos taurus) Origin recognition complex subunit 4	1	1	1	1	2.8	2.8	2.8	50.327	436	436	1	-2	12616000	1	+		+	11	654	TRUE	677	1329	1612	1612	21	284
CON__Q9Z2K1;CON__Q3ZAW8	CON__Q9Z2K1;CON__Q3ZAW8	7;7	1;1	1;1	>Q9Z2K1 SWISS-PROT:Q9Z2K1 Tax_Id=10090 Gene_Symbol=Krt16 Keratin, type I cytoskeletal 16;>Q3ZAW8 TREMBL:Q3ZAW8;Q9EQD6;Q9EQD7 Tax_Id=10090 Gene_Symbol=Krt16 Keratin intermediate filament 16a	2	7	1	1	11.5	1.9	1.9	51.606	469	469;474	1	-2	2103300	0	+		+	12	96;371;396;424;721;788;828	False;False;False;False;False;True;False	98;384;409;437;746;818;858;859	191;192;731;732;775;776;824;825;1482;1483;1610;1687;1688;1689;1690	219;220;221;222;223;847;848;897;898;899;900;956;957;1817;1818;1974;2064;2065;2066;2067;2068;2069;2070;2071	222;848;898;956;1817;1974;2070	0	117
CON__Streptavidin	CON__Streptavidin	4	4	4	>Streptavidin (S.avidinii)	1	4	4	4	43.1	43.1	43.1	16.622	160	160	0	76.755	4317800000	169			+	13	358;554;676;860	True;True;True;True	371;572;700;891	709;1072;1073;1074;1075;1076;1077;1078;1079;1080;1081;1082;1083;1084;1085;1086;1087;1088;1089;1090;1091;1092;1093;1094;1095;1096;1097;1098;1099;1100;1101;1102;1103;1104;1105;1106;1107;1108;1109;1110;1111;1112;1113;1372;1373;1374;1375;1376;1377;1378;1379;1380;1381;1382;1383;1384;1385;1386;1387;1388;1389;1390;1391;1392;1393;1394;1395;1396;1748;1749;1750;1751;1752;1753;1754;1755;1756;1757;1758;1759;…	818;819;820;1249;1250;1251;1252;1253;1254;1255;1256;1257;1258;1259;1260;1261;1262;1263;1264;1265;1266;1267;1268;1269;1270;1271;1272;1273;1274;1275;1276;1277;1278;1279;1280;1281;1282;1283;1284;1285;1286;1287;1288;1289;1290;1291;1292;1293;1294;1295;1296;1297;1298;1299;1300;1301;1302;1303;1304;1305;1306;1307;1308;1309;1310;1311;1312;1313;1314;1315;1316;1317;1318;1319;1320;1321;1322;1323;1324;1325;13…	819;1299;1693;2157
REV__tr|Q9HXW2|Q9HXW2_PSEAE	REV__tr|Q9HXW2|Q9HXW2_PSEAE	1	1	1	>tr|Q9HXW2|Q9HXW2_PSEAE Probable transcriptional regulator OS=Pseudomonas aeruginosa (strain ATCC 15692 / PAO1 / 1C / PRS 101 / LMG 12228) GN=PA3678 PE=4 SV=1	1	1	1	1	0	0	0	23.15	212	212	0.0043103	6.0783	4298900000	5		+		14	397	TRUE	410	777	901;902;903;904;905	901
REV__tr|Q9I0T1|Q9I0T1_PSEAE	REV__tr|Q9I0T1|Q9I0T1_PSEAE	1	1	1	>tr|Q9I0T1|Q9I0T1_PSEAE Probable acyl-CoA thiolase OS=Pseudomonas aeruginosa (strain ATCC 15692 / PAO1 / 1C / PRS 101 / LMG 12228) GN=PA2553 PE=3 SV=1	1	1	1	1	0	0	0	41.4	396	396	0.0081967	5.7868	5177500	1		+		15	250	TRUE	260	495	571	571
sp|G3XD94|UGND_PSEAE	sp|G3XD94|UGND_PSEAE	4	4	4	>sp|G3XD94|UGND_PSEAE UDP-N-acetyl-D-glucosamine 6-dehydrogenase OS=Pseudomonas aeruginosa (strain ATCC 15692 / PAO1 / 1C / PRS 101 / LMG 12228) GN=wbpA PE=1 SV=1	1	4	4	4	10.8	10.8	10.8	48.155	436	436	0	22.891	52609000	4				16	110;241;529;818	True;True;True;True	114;251;543;848	221;478;1019;1668;1669	254;549;1188;2045;2046	254;549;1188;2045
sp|O30508|ARUC_PSEAE	sp|O30508|ARUC_PSEAE	3	3	3	>sp|O30508|ARUC_PSEAE Succinylornithine transaminase/acetylornithine aminotransferase OS=Pseudomonas aeruginosa (strain ATCC 15692 / PAO1 / 1C / PRS 101 / LMG 12228) GN=aruC PE=1 SV=2	1	3	3	3	11.6	11.6	11.6	43.747	406	406	0	30.919	23441000	2				17	187;385;757	True;True;True	196;398;786	377;758;1557	436;878;1911	436;878;1911
sp|O50175|ASTB_PSEAE	sp|O50175|ASTB_PSEAE	1	1	1	>sp|O50175|ASTB_PSEAE N-succinylarginine dihydrolase OS=Pseudomonas aeruginosa (strain ATCC 15692 / PAO1 / 1C / PRS 101 / LMG 12228) GN=astB PE=3 SV=1	1	1	1	1	2.5	2.5	2.5	48.874	448	448	0	7.1211	4119200	2				18	691	TRUE	716	1425;1426	1750;1751	1751
sp|O52759|RS4_PSEAE	sp|O52759|RS4_PSEAE	3	3	3	>sp|O52759|RS4_PSEAE 30S ribosomal protein S4 OS=Pseudomonas aeruginosa (strain ATCC 15692 / PAO1 / 1C / PRS 101 / LMG 12228) GN=rpsD PE=3 SV=2	1	3	3	3	14.1	14.1	14.1	23.277	206	206	0	21.172	77148000	6				19	274;414;498	True;True;True	284;427;512	536;537;809;810;969;970	618;619;940;941;1130;1131	619;941;1131
sp|O52760|RPOA_PSEAE	sp|O52760|RPOA_PSEAE	7	7	7	>sp|O52760|RPOA_PSEAE DNA-directed RNA polymerase subunit alpha OS=Pseudomonas aeruginosa (strain ATCC 15692 / PAO1 / 1C / PRS 101 / LMG 12228) GN=rpoA PE=3 SV=2	1	7	7	7	22.5	22.5	22.5	36.649	333	333	0	49.903	162590000	14				20	27;228;293;379;492;544;827	True;True;True;True;True;True;True	27;238;303;392;506;560;857	51;52;453;454;575;576;748;749;956;957;1050;1051;1685;1686	58;59;520;521;663;664;868;869;1116;1117;1220;1221;2062;2063	58;521;664;869;1116;1221;2063
sp|O52762|CATA_PSEAE	sp|O52762|CATA_PSEAE	10	10	10	>sp|O52762|CATA_PSEAE Catalase OS=Pseudomonas aeruginosa (strain ATCC 15692 / PAO1 / 1C / PRS 101 / LMG 12228) GN=katA PE=1 SV=1	1	10	10	10	24.5	24.5	24.5	55.588	482	482	0	107.35	260660000	21				21	133;203;281;426;430;441;507;552;720;880	True;True;True;True;True;True;True;True;True;True	138;213;291;439;443;454;521;570;745;911	267;268;411;412;550;828;829;836;859;860;861;862;985;986;1068;1069;1480;1481;1795;1796	310;311;476;477;636;960;961;970;998;999;1000;1001;1150;1151;1245;1246;1814;1815;1816;2210;2211	310;476;636;961;970;1000;1150;1246;1814;2210
sp|O54439|ACP1_PSEAE	sp|O54439|ACP1_PSEAE	1	1	1	>sp|O54439|ACP1_PSEAE Acyl carrier protein 1 OS=Pseudomonas aeruginosa (strain ATCC 15692 / PAO1 / 1C / PRS 101 / LMG 12228) GN=acpP1 PE=3 SV=4	1	1	1	1	11.5	11.5	11.5	8.7406	78	78	0.0042735	6.0415	66449000	2				22	381	TRUE	394	752;753	872;873	873
sp|O69753|PHZB1_PSEAE;sp|Q9S508|PHZB2_PSEAE	sp|O69753|PHZB1_PSEAE;sp|Q9S508|PHZB2_PSEAE	4;3	4;3	4;3	>sp|O69753|PHZB1_PSEAE Phenazine biosynthesis protein PhzB 1 OS=Pseudomonas aeruginosa (strain ATCC 15692 / PAO1 / 1C / PRS 101 / LMG 12228) GN=phzB1 PE=3 SV=1;>sp|Q9S508|PHZB2_PSEAE Phenazine biosynthesis protein PhzB 2 OS=Pseudomonas aeruginosa (strain A	2	4	4	4	28.4	28.4	28.4	18.888	162	162;162	0	36.641	109810000	9				23	70;158;398;598	True;True;True;True	71;165;411;620	139;140;316;317;778;779;780;1217	162;163;164;369;370;906;907;908;1477	164;369;907;1477
sp|O69754|PHZF_PSEAE	sp|O69754|PHZF_PSEAE	1	1	1	>sp|O69754|PHZF_PSEAE Trans-2,3-dihydro-3-hydroxyanthranilate isomerase OS=Pseudomonas aeruginosa (strain ATCC 15692 / PAO1 / 1C / PRS 101 / LMG 12228) GN=phzF1 PE=3 SV=2	1	1	1	1	4	4	4	30.342	278	278	0	7.3879	4788700	3				24	596	TRUE	618	1214;1215	1473;1474;1475	1475
sp|O82850|RS2_PSEAE	sp|O82850|RS2_PSEAE	2	2	2	>sp|O82850|RS2_PSEAE 30S ribosomal protein S2 OS=Pseudomonas aeruginosa (strain ATCC 15692 / PAO1 / 1C / PRS 101 / LMG 12228) GN=rpsB PE=3 SV=2	1	2	2	2	7.3	7.3	7.3	27.336	246	246	0	12.91	37621000	4				25	337;850	True;True	348;881	662;663;1731;1732	758;759;2120;2121	759;2120
sp|O82851|EFTS_PSEAE	sp|O82851|EFTS_PSEAE	4	4	4	>sp|O82851|EFTS_PSEAE Elongation factor Ts OS=Pseudomonas aeruginosa (strain ATCC 15692 / PAO1 / 1C / PRS 101 / LMG 12228) GN=tsf PE=3 SV=1	1	4	4	4	16.6	16.6	16.6	30.653	289	289	0	28.532	171400000	10				26	194;232;304;503	True;True;True;True	204;242;314;517	391;392;460;461;596;597;598;599;978;979	450;451;529;530;684;685;686;687;1142;1143	451;529;686;1143
sp|O86428|ILVE_PSEAE	sp|O86428|ILVE_PSEAE	2	2	2	>sp|O86428|ILVE_PSEAE Branched-chain-amino-acid aminotransferase OS=Pseudomonas aeruginosa (strain ATCC 15692 / PAO1 / 1C / PRS 101 / LMG 12228) GN=ilvE PE=1 SV=2	1	2	2	2	8.1	8.1	8.1	34.084	307	307	0	14.153	39957000	5				27	114;586	True;True	118;608	227;228;1194;1195	262;263;264;1449;1450	263;1450
sp|O87125|CHEB1_PSEAE	sp|O87125|CHEB1_PSEAE	1	1	1	>sp|O87125|CHEB1_PSEAE Chemotaxis response regulator protein-glutamate methylesterase of group 1 operon OS=Pseudomonas aeruginosa (strain ATCC 15692 / PAO1 / 1C / PRS 101 / LMG 12228) GN=cheB1 PE=1 SV=2	1	1	1	1	4.6	4.6	4.6	39.004	368	368	0	7.8519	1046400	2				28	760	TRUE	790	1562;1563	1917;1918	1918
sp|P04739|FMPO_PSEAE	sp|P04739|FMPO_PSEAE	3	3	3	>sp|P04739|FMPO_PSEAE Fimbrial protein OS=Pseudomonas aeruginosa (strain ATCC 15692 / PAO1 / 1C / PRS 101 / LMG 12228) GN=pilA PE=1 SV=1	1	3	3	3	29.5	29.5	29.5	15.512	149	149	0	27.302	76998000	5				29	334;630;729	True;True;True	345;653;756	655;1277;1278;1498;1499	751;1553;1554;1835;1836	751;1553;1835
sp|P05384|DBHB_PSEAE	sp|P05384|DBHB_PSEAE	2	2	2	>sp|P05384|DBHB_PSEAE DNA-binding protein HU-beta OS=Pseudomonas aeruginosa (strain ATCC 15692 / PAO1 / 1C / PRS 101 / LMG 12228) GN=hupB PE=1 SV=3	1	2	2	2	32.2	32.2	32.2	9.0865	90	90	0	28.832	99565000	8				30	56;633	True;True	57;656	110;111;112;113;1285;1286;1287;1288	127;128;129;130;1561;1562;1563;1564;1565;1566	127;1566
sp|P08308|OTCC_PSEAE	sp|P08308|OTCC_PSEAE	11	11	11	>sp|P08308|OTCC_PSEAE Ornithine carbamoyltransferase, catabolic OS=Pseudomonas aeruginosa (strain ATCC 15692 / PAO1 / 1C / PRS 101 / LMG 12228) GN=arcB PE=1 SV=3	1	11	11	11	27.4	27.4	27.4	38.108	336	336	0	74.988	638580000	31				31	164;229;342;505;551;562;573;581;605;876;884	True;True;True;True;True;True;True;True;True;True;True	171;172;239;354;519;569;580;591;603;627;907;915	331;332;333;334;455;456;673;982;983;1066;1067;1127;1128;1158;1159;1160;1161;1162;1185;1186;1228;1229;1788;1789;1803	385;386;387;388;522;523;777;1146;1147;1148;1241;1242;1243;1244;1366;1367;1404;1405;1406;1407;1408;1438;1439;1440;1441;1488;1489;2200;2201;2202;2218	386;523;777;1147;1244;1366;1407;1440;1489;2200;2218	22	258
sp|P09591|EFTU_PSEAE	sp|P09591|EFTU_PSEAE	14	14	14	>sp|P09591|EFTU_PSEAE Elongation factor Tu OS=Pseudomonas aeruginosa (strain ATCC 15692 / PAO1 / 1C / PRS 101 / LMG 12228) GN=tufA PE=1 SV=2	1	14	14	14	44.1	44.1	44.1	43.369	397	397	0	133.03	2076700000	38				32	33;40;120;255;273;290;300;510;549;568;726;727;731;817	True;True;True;True;True;True;True;True;True;True;True;True;True;True	33;41;124;265;283;300;310;524;566;586;753;754;758;847	63;64;80;81;240;241;503;504;505;506;534;535;567;568;587;588;991;992;1060;1061;1141;1142;1143;1144;1145;1494;1495;1496;1504;1666;1667	72;73;94;95;96;97;278;279;581;582;583;584;585;586;616;617;653;654;675;676;1156;1157;1158;1159;1235;1236;1380;1381;1382;1383;1384;1831;1832;1833;1841;2041;2042;2043;2044	73;94;279;581;616;654;676;1157;1235;1383;1831;1832;1841;2042	23	372
sp|P0C2B2|DSBA_PSEAE	sp|P0C2B2|DSBA_PSEAE	2	2	2	>sp|P0C2B2|DSBA_PSEAE Thiol:disulfide interchange protein DsbA OS=Pseudomonas aeruginosa (strain ATCC 15692 / PAO1 / 1C / PRS 101 / LMG 12228) GN=dsbA PE=1 SV=1	1	2	2	2	10.9	10.9	10.9	23.375	211	211	0	12.523	10931000	2				33	409;476	True;True	422;490	798;799;928	926;927;1086	927;1086
sp|P11221|OPRI_PSEAE	sp|P11221|OPRI_PSEAE	2	2	2	>sp|P11221|OPRI_PSEAE Major outer membrane lipoprotein OS=Pseudomonas aeruginosa (strain ATCC 15692 / PAO1 / 1C / PRS 101 / LMG 12228) GN=oprI PE=3 SV=1	1	2	2	2	25.3	25.3	25.3	8.8348	83	83	0	15.947	17295000	9				34	387;502	True;True	400;516	760;761;976;977	880;881;882;883;1137;1138;1139;1140;1141	883;1138
sp|P13794|PORF_PSEAE	sp|P13794|PORF_PSEAE	10	10	10	>sp|P13794|PORF_PSEAE Outer membrane porin F OS=Pseudomonas aeruginosa (strain ATCC 15692 / PAO1 / 1C / PRS 101 / LMG 12228) GN=oprF PE=1 SV=1	1	10	10	10	33.4	33.4	33.4	37.639	350	350	0	94.578	826050000	33				35	94;146;570;616;624;627;748;801;869;888	True;True;True;True;True;True;True;True;True;True	96;151;588;638;647;650;777;831;900;919	186;187;292;293;294;1152;1153;1154;1248;1249;1263;1264;1270;1271;1272;1273;1538;1539;1635;1636;1637;1777;1809;1810	214;215;339;340;341;342;343;1395;1396;1397;1398;1514;1515;1536;1537;1538;1544;1545;1546;1547;1548;1549;1890;1891;1892;1893;2001;2002;2003;2004;2186;2226;2227	214;340;1396;1514;1536;1549;1890;2004;2186;2227
sp|P13981|ARCA_PSEAE	sp|P13981|ARCA_PSEAE	15	15	15	>sp|P13981|ARCA_PSEAE Arginine deiminase OS=Pseudomonas aeruginosa (strain ATCC 15692 / PAO1 / 1C / PRS 101 / LMG 12228) GN=arcA PE=1 SV=2	1	15	15	15	32.5	32.5	32.5	46.435	418	418	0	136.11	1366300000	40				36	45;126;132;176;376;389;390;587;603;606;625;626;682;782;834	True;True;True;True;True;True;True;True;True;True;True;True;True;True;True	46;130;137;185;389;402;403;609;625;628;648;649;707;812;865	90;91;251;252;265;266;356;357;742;743;764;765;766;1196;1197;1224;1225;1230;1231;1265;1266;1267;1268;1269;1409;1410;1600;1601;1700;1701	106;107;290;291;292;306;307;308;309;415;416;862;863;886;887;888;1451;1452;1453;1484;1485;1490;1491;1539;1540;1541;1542;1543;1729;1730;1731;1732;1961;1962;1963;1964;2081;2082;2083;2084	107;292;306;415;862;887;888;1452;1485;1491;1540;1541;1729;1962;2081
sp|P13982|ARCC_PSEAE	sp|P13982|ARCC_PSEAE	2	2	2	>sp|P13982|ARCC_PSEAE Carbamate kinase OS=Pseudomonas aeruginosa (strain ATCC 15692 / PAO1 / 1C / PRS 101 / LMG 12228) GN=arcC PE=3 SV=1	1	2	2	2	6.8	6.8	6.8	33.08	310	310	0	14.796	48524000	5				37	47;813	True;True	48;843	94;95;96;97;1657	110;111;112;113;2029	111;2029
sp|P14165|CISY_PSEAE	sp|P14165|CISY_PSEAE	2	2	2	>sp|P14165|CISY_PSEAE Citrate synthase OS=Pseudomonas aeruginosa (strain ATCC 15692 / PAO1 / 1C / PRS 101 / LMG 12228) GN=gltA PE=3 SV=2	1	2	2	2	5.4	5.4	5.4	47.694	428	428	0	17.527	23228000	4				38	530;541	True;True	544;556	1020;1021;1044;1045	1189;1190;1214;1215	1190;1214
sp|P24474|NIRS_PSEAE	sp|P24474|NIRS_PSEAE	1	1	1	>sp|P24474|NIRS_PSEAE Nitrite reductase OS=Pseudomonas aeruginosa (strain ATCC 15692 / PAO1 / 1C / PRS 101 / LMG 12228) GN=nirS PE=1 SV=1	1	1	1	1	1.6	1.6	1.6	62.653	568	568	0	6.9594	2751400	2				39	314	TRUE	324	615;616	703;704	704
sp|P28810|MMSA_PSEAE	sp|P28810|MMSA_PSEAE	3	3	3	>sp|P28810|MMSA_PSEAE Methylmalonate-semialdehyde dehydrogenase [acylating] OS=Pseudomonas aeruginosa (strain ATCC 15692 / PAO1 / 1C / PRS 101 / LMG 12228) GN=mmsA PE=1 SV=2	1	3	3	3	10.9	10.9	10.9	53.663	497	497	0	27.948	25066000	4				40	295;446;821	True;True;True	305;459;851	578;579;870;1674;1675	666;667;1009;1010;2051;2052	666;1009;2052
sp|P29363|THRC_PSEAE	sp|P29363|THRC_PSEAE	1	1	1	>sp|P29363|THRC_PSEAE Threonine synthase OS=Pseudomonas aeruginosa (strain ATCC 15692 / PAO1 / 1C / PRS 101 / LMG 12228) GN=thrC PE=3 SV=3	1	1	1	1	2.1	2.1	2.1	51.795	469	469	0	6.8026	2324200	1				41	104	TRUE	108	211	242	242
sp|P29365|DHOM_PSEAE	sp|P29365|DHOM_PSEAE	1	1	1	>sp|P29365|DHOM_PSEAE Homoserine dehydrogenase OS=Pseudomonas aeruginosa (strain ATCC 15692 / PAO1 / 1C / PRS 101 / LMG 12228) GN=hom PE=3 SV=2	1	1	1	1	3.5	3.5	3.5	46.223	434	434	0.0042017	5.8904	3824000	0				42	506	TRUE	520	984	1149	1149
sp|P30718|CH60_PSEAE	sp|P30718|CH60_PSEAE	15	15	15	>sp|P30718|CH60_PSEAE 60 kDa chaperonin OS=Pseudomonas aeruginosa (strain ATCC 15692 / PAO1 / 1C / PRS 101 / LMG 12228) GN=groL PE=1 SV=3	1	15	15	15	31.3	31.3	31.3	57.085	547	547	0	153.23	1068000000	45				43	8;68;101;103;129;168;169;189;221;535;609;611;634;749;758	True;True;True;True;True;True;True;True;True;True;True;True;True;True;True	8;69;103;105;106;107;133;134;176;177;178;199;231;549;550;631;633;657;778;787;788	16;17;18;135;136;202;203;205;206;207;208;209;210;257;258;259;260;340;341;342;343;344;382;442;443;1030;1031;1032;1033;1236;1237;1240;1241;1289;1540;1541;1558;1559;1560	19;20;21;22;23;157;158;233;234;236;237;238;239;240;241;298;299;300;301;396;397;398;399;400;401;402;441;509;510;1199;1200;1201;1202;1499;1500;1505;1506;1507;1567;1894;1895;1912;1913;1914;1915	19;158;234;238;299;398;402;441;510;1201;1500;1507;1567;1895;1913	24;25;26;27;28;29	16;69;111;114;233;389
sp|P30720|CH10_PSEAE	sp|P30720|CH10_PSEAE	2	2	2	>sp|P30720|CH10_PSEAE 10 kDa chaperonin OS=Pseudomonas aeruginosa (strain ATCC 15692 / PAO1 / 1C / PRS 101 / LMG 12228) GN=groS PE=3 SV=1	1	2	2	2	41.2	41.2	41.2	10.267	97	97	0	13.305	52970000	4				44	688;835	True;True	713;866	1420;1421;1702;1703	1744;1745;1746;2085;2086	1744;2085
sp|P31961|EDD_PSEAE	sp|P31961|EDD_PSEAE	1	1	1	>sp|P31961|EDD_PSEAE Phosphogluconate dehydratase OS=Pseudomonas aeruginosa (strain ATCC 15692 / PAO1 / 1C / PRS 101 / LMG 12228) GN=edd PE=3 SV=3	1	1	1	1	1.8	1.8	1.8	65.182	608	608	0	6.5831	3120600	1				45	383	TRUE	396	756	876	876
sp|P32722|PORD_PSEAE	sp|P32722|PORD_PSEAE	2	2	2	>sp|P32722|PORD_PSEAE Porin D OS=Pseudomonas aeruginosa (strain ATCC 15692 / PAO1 / 1C / PRS 101 / LMG 12228) GN=oprD PE=1 SV=1	1	2	2	2	7.4	7.4	7.4	48.36	443	443	0	12.003	1150600	3				46	592;699	True;True	614;724	1206;1207;1440	1465;1466;1765	1465;1765	30	111
sp|P37798|ACCC_PSEAE	sp|P37798|ACCC_PSEAE	4	4	4	>sp|P37798|ACCC_PSEAE Biotin carboxylase OS=Pseudomonas aeruginosa (strain ATCC 15692 / PAO1 / 1C / PRS 101 / LMG 12228) GN=accC PE=1 SV=1	1	4	4	4	12.2	12.2	12.2	48.887	449	449	0	40.29	61148000	10				47	555;637;693;776	True;True;True;True	573;660;718;806	1114;1115;1294;1295;1429;1430;1591;1592	1353;1354;1573;1574;1754;1755;1950;1951;1952;1953	1353;1573;1755;1953
sp|P37799|BCCP_PSEAE	sp|P37799|BCCP_PSEAE	4	4	4	>sp|P37799|BCCP_PSEAE Biotin carboxyl carrier protein of acetyl-CoA carboxylase OS=Pseudomonas aeruginosa (strain ATCC 15692 / PAO1 / 1C / PRS 101 / LMG 12228) GN=accB PE=3 SV=1	1	4	4	4	46.8	46.8	46.8	16.455	156	156	0	52.274	1681400000	17				48	7;469;669;686	True;True;True;True	7;483;692;693;711	14;15;918;919;1357;1358;1359;1360;1417;1418	14;15;16;17;18;1073;1074;1075;1076;1646;1647;1648;1649;1650;1651;1741;1742	17;1073;1649;1741	31	87
sp|P38100|CARB_PSEAE	sp|P38100|CARB_PSEAE	3	3	3	>sp|P38100|CARB_PSEAE Carbamoyl-phosphate synthase large chain OS=Pseudomonas aeruginosa (strain ATCC 15692 / PAO1 / 1C / PRS 101 / LMG 12228) GN=carB PE=3 SV=3	1	3	3	3	3.5	3.5	3.5	117.33	1073	1073	0	23.243	35709000	5				49	204;354;715	True;True;True	214;367;740	413;702;703;1471;1472	478;811;812;1805;1806	478;811;1805
sp|P43334|PH4H_PSEAE	sp|P43334|PH4H_PSEAE	1	1	1	>sp|P43334|PH4H_PSEAE Phenylalanine-4-hydroxylase OS=Pseudomonas aeruginosa (strain ATCC 15692 / PAO1 / 1C / PRS 101 / LMG 12228) GN=phhA PE=3 SV=2	1	1	1	1	3.4	3.4	3.4	30.321	262	262	0	6.4223	6687900	1				50	365	TRUE	378	720	833	833
sp|P43336|PHHC_PSEAE	sp|P43336|PHHC_PSEAE	2	2	2	>sp|P43336|PHHC_PSEAE Aromatic-amino-acid aminotransferase OS=Pseudomonas aeruginosa (strain ATCC 15692 / PAO1 / 1C / PRS 101 / LMG 12228) GN=phhC PE=3 SV=2	1	2	2	2	7.3	7.3	7.3	43.273	399	399	0	15.02	29357000	4				51	11;331	True;True	11;342	22;23;649;650	27;28;745;746	28;745
sp|P47203|FTSA_PSEAE	sp|P47203|FTSA_PSEAE	1	1	1	>sp|P47203|FTSA_PSEAE Cell division protein FtsA OS=Pseudomonas aeruginosa (strain ATCC 15692 / PAO1 / 1C / PRS 101 / LMG 12228) GN=ftsA PE=3 SV=2	1	1	1	1	2.4	2.4	2.4	44.646	417	417	0	6.5091	16054000	2				52	718	TRUE	743	1476;1477	1810;1811	1810
sp|P47204|FTSZ_PSEAE	sp|P47204|FTSZ_PSEAE	2	2	2	>sp|P47204|FTSZ_PSEAE Cell division protein FtsZ OS=Pseudomonas aeruginosa (strain ATCC 15692 / PAO1 / 1C / PRS 101 / LMG 12228) GN=ftsZ PE=1 SV=2	1	2	2	2	5.8	5.8	5.8	41.218	394	394	0	13.343	21961000	3				53	257;733	True;True	267;760	508;509;1506	588;589;1843	589;1843
sp|P53593|SUCC_PSEAE	sp|P53593|SUCC_PSEAE	9	9	9	>sp|P53593|SUCC_PSEAE Succinyl-CoA ligase [ADP-forming] subunit beta OS=Pseudomonas aeruginosa (strain ATCC 15692 / PAO1 / 1C / PRS 101 / LMG 12228) GN=sucC PE=3 SV=2	1	9	9	9	27.6	27.6	27.6	41.542	388	388	0	79.365	291360000	16				54	31;97;109;326;356;420;576;597;614	True;True;True;True;True;True;True;True;True	31;99;113;337;369;433;594;619;636	59;60;193;194;219;220;639;640;706;819;820;1167;1168;1216;1245;1246	68;69;224;225;252;253;735;736;815;950;951;1413;1414;1476;1511;1512	69;224;252;736;815;950;1413;1476;1511
sp|P53641|SODF_PSEAE	sp|P53641|SODF_PSEAE	2	2	2	>sp|P53641|SODF_PSEAE Superoxide dismutase [Fe] OS=Pseudomonas aeruginosa (strain ATCC 15692 / PAO1 / 1C / PRS 101 / LMG 12228) GN=sodB PE=3 SV=3	1	2	2	2	9.3	9.3	9.3	21.351	193	193	0	12.671	93750000	3				55	34;653	True;True	34;676	65;66;1328	74;75;1611	75;1611
sp|P54292|RHLR_PSEAE	sp|P54292|RHLR_PSEAE	1	1	1	>sp|P54292|RHLR_PSEAE Regulatory protein RhlR OS=Pseudomonas aeruginosa (strain ATCC 15692 / PAO1 / 1C / PRS 101 / LMG 12228) GN=rhlR PE=3 SV=1	1	1	1	1	5.4	5.4	5.4	27.577	241	241	0	7.6649	3920500	2				56	81	TRUE	83	162;163	187;188	187
sp|P72173|AAT_PSEAE	sp|P72173|AAT_PSEAE	4	4	4	>sp|P72173|AAT_PSEAE Aspartate aminotransferase OS=Pseudomonas aeruginosa (strain ATCC 15692 / PAO1 / 1C / PRS 101 / LMG 12228) GN=aspC PE=3 SV=2	1	4	4	4	12.8	12.8	12.8	43.319	398	398	0	30.049	53577000	6				57	44;406;761;841	True;True;True;True	45;419;791;872	88;89;792;793;1564;1565;1712;1713	104;105;920;921;1919;1920;2096;2097	105;921;1920;2096
sp|Q03456|FUR_PSEAE	sp|Q03456|FUR_PSEAE	1	1	1	>sp|Q03456|FUR_PSEAE Ferric uptake regulation protein OS=Pseudomonas aeruginosa (strain ATCC 15692 / PAO1 / 1C / PRS 101 / LMG 12228) GN=fur PE=1 SV=1	1	1	1	1	9.7	9.7	9.7	15.234	134	134	0.0041152	5.8175	2321300	0				58	798	TRUE	828	1629	1995	1995
sp|Q51422|SYDND_PSEAE	sp|Q51422|SYDND_PSEAE	3	3	3	>sp|Q51422|SYDND_PSEAE Aspartate--tRNA(Asp/Asn) ligase OS=Pseudomonas aeruginosa (strain ATCC 15692 / PAO1 / 1C / PRS 101 / LMG 12228) GN=aspS PE=1 SV=2	1	3	3	3	6.3	6.3	6.3	66.207	591	591	0	23.104	18484000	6				59	190;362;762	True;True;True	200;375;792	383;384;715;716;1566;1567	442;443;826;827;1921;1922	442;827;1921
sp|Q51561|RPOB_PSEAE	sp|Q51561|RPOB_PSEAE	14	14	14	>sp|Q51561|RPOB_PSEAE DNA-directed RNA polymerase subunit beta OS=Pseudomonas aeruginosa (strain ATCC 15692 / PAO1 / 1C / PRS 101 / LMG 12228) GN=rpoB PE=3 SV=2	1	14	14	14	12.2	12.2	12.2	150.84	1357	1357	0	97.359	219200000	29				60	76;199;247;271;382;477;493;521;536;538;667;675;694;822	True;True;True;True;True;True;True;True;True;True;True;True;True;True	77;78;209;257;281;395;491;507;535;551;553;690;699;719;852	152;153;154;402;403;404;405;490;531;532;754;755;929;930;958;959;1007;1034;1037;1038;1039;1352;1353;1354;1370;1371;1431;1676	177;178;179;465;466;467;468;566;613;614;874;875;1087;1088;1118;1119;1120;1176;1203;1206;1207;1208;1209;1641;1642;1643;1669;1670;1671;1756;2053	179;467;566;613;875;1088;1120;1176;1203;1209;1641;1671;1756;2053	32	658
sp|Q51567|SUCD_PSEAE	sp|Q51567|SUCD_PSEAE	7	7	7	>sp|Q51567|SUCD_PSEAE Succinyl-CoA ligase [ADP-forming] subunit alpha OS=Pseudomonas aeruginosa (strain ATCC 15692 / PAO1 / 1C / PRS 101 / LMG 12228) GN=sucD PE=3 SV=2	1	7	7	7	31.2	31.2	31.2	30.266	295	295	0	54.202	310320000	20				61	53;74;141;177;245;328;644	True;True;True;True;True;True;True	54;75;146;186;255;339;667	106;107;148;149;283;358;359;485;486;487;488;642;643;644;645;1307;1308	123;124;172;173;174;328;329;417;418;560;561;562;563;564;738;739;740;741;1588;1589	124;172;329;417;563;741;1589
sp|Q59636|NDK_PSEAE	sp|Q59636|NDK_PSEAE	3	3	3	>sp|Q59636|NDK_PSEAE Nucleoside diphosphate kinase OS=Pseudomonas aeruginosa (strain ATCC 15692 / PAO1 / 1C / PRS 101 / LMG 12228) GN=ndk PE=3 SV=2	1	3	3	3	30.8	30.8	30.8	15.592	143	143	0	31.934	100350000	6				62	13;588;711	True;True;True	13;610;736	26;1198;1199;1461;1462	31;1454;1455;1456;1792;1793	31;1456;1792
sp|Q59637|ODP1_PSEAE	sp|Q59637|ODP1_PSEAE	12	12	12	>sp|Q59637|ODP1_PSEAE Pyruvate dehydrogenase E1 component OS=Pseudomonas aeruginosa (strain ATCC 15692 / PAO1 / 1C / PRS 101 / LMG 12228) GN=aceE PE=3 SV=2	1	12	12	12	13.4	13.4	13.4	99.563	882	882	0	75.367	218810000	22				63	4;160;213;267;321;339;373;384;517;540;663;697	True;True;True;True;True;True;True;True;True;True;True;True	4;167;223;277;332;350;386;397;531;555;686;722	9;10;322;427;428;429;525;631;632;665;666;737;738;757;1002;1042;1043;1345;1346;1436	9;10;375;492;493;494;495;496;607;726;727;761;762;857;858;877;1170;1212;1213;1634;1635;1761	9;375;493;607;726;762;858;877;1170;1213;1635;1761
sp|Q59638|ODP2_PSEAE	sp|Q59638|ODP2_PSEAE	9	9	9	>sp|Q59638|ODP2_PSEAE Dihydrolipoyllysine-residue acetyltransferase component of pyruvate dehydrogenase complex OS=Pseudomonas aeruginosa (strain ATCC 15692 / PAO1 / 1C / PRS 101 / LMG 12228) GN=aceF PE=2 SV=2	1	9	9	9	26.3	26.3	26.3	56.708	547	547	0	64.373	176560000	17				64	20;21;23;165;433;451;465;508;763	True;True;True;True;True;True;True;True;True	20;21;23;173;446;464;479;522;793	38;39;40;43;44;335;843;844;881;882;911;987;988;1568;1569	43;44;45;50;51;389;980;981;1021;1022;1023;1024;1064;1152;1153;1923;1924	43;45;50;389;980;1022;1064;1152;1924	33	328
sp|Q9HT14|ATP6_PSEAE	sp|Q9HT14|ATP6_PSEAE	2	2	2	>sp|Q9HT14|ATP6_PSEAE ATP synthase subunit a OS=Pseudomonas aeruginosa (strain ATCC 15692 / PAO1 / 1C / PRS 101 / LMG 12228) GN=atpB PE=3 SV=1	1	2	2	2	9	9	9	31.92	289	289	0	10.967	19127000	3				65	377;485	True;True	390;499	744;745;944	864;865;1104	864;1104
sp|Q9HT16|ATPF_PSEAE	sp|Q9HT16|ATPF_PSEAE	2	2	2	>sp|Q9HT16|ATPF_PSEAE ATP synthase subunit b OS=Pseudomonas aeruginosa (strain ATCC 15692 / PAO1 / 1C / PRS 101 / LMG 12228) GN=atpF PE=3 SV=1	1	2	2	2	13.5	13.5	13.5	16.956	156	156	0	13.789	38111000	3				66	86;302	True;True	88;312	172;173;591	197;198;679	197;679
sp|Q9HT17|ATPD_PSEAE	sp|Q9HT17|ATPD_PSEAE	1	1	1	>sp|Q9HT17|ATPD_PSEAE ATP synthase subunit delta OS=Pseudomonas aeruginosa (strain ATCC 15692 / PAO1 / 1C / PRS 101 / LMG 12228) GN=atpH PE=3 SV=1	1	1	1	1	6.2	6.2	6.2	19.26	178	178	0	6.5109	6707700	1				67	39	TRUE	40	79	93	93
sp|Q9HT18|ATPA_PSEAE	sp|Q9HT18|ATPA_PSEAE	11	11	11	>sp|Q9HT18|ATPA_PSEAE ATP synthase subunit alpha OS=Pseudomonas aeruginosa (strain ATCC 15692 / PAO1 / 1C / PRS 101 / LMG 12228) GN=atpA PE=3 SV=1	1	11	11	11	25.1	25.1	25.1	55.393	514	514	0	98.323	488370000	24				68	155;220;230;348;543;557;678;679;690;740;833	True;True;True;True;True;True;True;True;True;True;True	162;230;240;361;558;559;575;702;703;704;715;768;864	312;440;441;457;690;691;1047;1048;1049;1118;1119;1399;1400;1401;1402;1403;1404;1423;1424;1517;1518;1698;1699	365;507;508;524;795;796;797;798;1217;1218;1219;1357;1358;1718;1719;1720;1721;1722;1723;1748;1749;1854;1855;2079;2080	365;508;524;796;1218;1358;1719;1722;1748;1854;2079	34;35	1;157
sp|Q9HT19|ATPG_PSEAE	sp|Q9HT19|ATPG_PSEAE	1	1	1	>sp|Q9HT19|ATPG_PSEAE ATP synthase gamma chain OS=Pseudomonas aeruginosa (strain ATCC 15692 / PAO1 / 1C / PRS 101 / LMG 12228) GN=atpG PE=3 SV=1	1	1	1	1	3.1	3.1	3.1	31.553	286	286	0	7.404	11844000	2				69	656	TRUE	679	1332;1333	1615;1616	1615
sp|Q9HT20|ATPB_PSEAE	sp|Q9HT20|ATPB_PSEAE	9	9	9	>sp|Q9HT20|ATPB_PSEAE ATP synthase subunit beta OS=Pseudomonas aeruginosa (strain ATCC 15692 / PAO1 / 1C / PRS 101 / LMG 12228) GN=atpD PE=3 SV=1	1	9	9	9	30.6	30.6	30.6	49.499	458	458	0	115.54	207150000	22				70	127;153;264;353;612;645;739;768;885	True;True;True;True;True;True;True;True;True	131;160;274;366;634;668;767;798;916	253;254;309;310;519;520;700;701;1242;1243;1309;1310;1311;1312;1516;1577;1578;1804;1805	293;294;295;362;363;601;602;809;810;1508;1509;1590;1591;1592;1593;1853;1932;1933;1934;1935;2219;2220	294;363;601;810;1508;1592;1853;1934;2220
sp|Q9HT95|ATSE4_PSEAE	sp|Q9HT95|ATSE4_PSEAE	1	1	1	>sp|Q9HT95|ATSE4_PSEAE Acetyltransferase PA5475 OS=Pseudomonas aeruginosa (strain ATCC 15692 / PAO1 / 1C / PRS 101 / LMG 12228) GN=PA5475 PE=3 SV=1	1	1	1	1	5.9	5.9	5.9	21	186	186	0	9.5279	5649600	4				71	139	TRUE	144	277;278;279;280	321;322;323;324	322
sp|Q9HTD7|ASPA_PSEAE	sp|Q9HTD7|ASPA_PSEAE	2	2	2	>sp|Q9HTD7|ASPA_PSEAE Aspartate ammonia-lyase OS=Pseudomonas aeruginosa (strain ATCC 15692 / PAO1 / 1C / PRS 101 / LMG 12228) GN=aspA PE=3 SV=1	1	2	2	2	6.8	6.8	6.8	51.069	474	474	0	15.73	26643000	4				72	283;875	True;True	293;906	553;1786;1787	639;2197;2198;2199	639;2199
sp|Q9HTJ1|BETB_PSEAE	sp|Q9HTJ1|BETB_PSEAE	1	1	1	>sp|Q9HTJ1|BETB_PSEAE NAD/NADP-dependent betaine aldehyde dehydrogenase OS=Pseudomonas aeruginosa (strain ATCC 15692 / PAO1 / 1C / PRS 101 / LMG 12228) GN=betB PE=1 SV=1	1	1	1	1	2.7	2.7	2.7	53.332	490	490	0.0042918	6.0765	3702100	2				73	668	TRUE	691	1355;1356	1644;1645	1644
sp|Q9HTN8|RL28_PSEAE	sp|Q9HTN8|RL28_PSEAE	1	1	1	>sp|Q9HTN8|RL28_PSEAE 50S ribosomal protein L28 OS=Pseudomonas aeruginosa (strain ATCC 15692 / PAO1 / 1C / PRS 101 / LMG 12228) GN=rpmB PE=3 SV=1	1	1	1	1	12.8	12.8	12.8	9.0655	78	78	0	7.2478	9530000	3				74	252	TRUE	262	498;499	574;575;576	576
sp|Q9HTZ7|PCKA_PSEAE	sp|Q9HTZ7|PCKA_PSEAE	1	1	1	>sp|Q9HTZ7|PCKA_PSEAE Phosphoenolpyruvate carboxykinase [ATP] OS=Pseudomonas aeruginosa (strain ATCC 15692 / PAO1 / 1C / PRS 101 / LMG 12228) GN=pckA PE=3 SV=1	1	1	1	1	2.5	2.5	2.5	55.731	513	513	0	9.0972	5621100	2				75	547	TRUE	564	1057;1058	1232;1233	1233
sp|Q9HU65|GLNA_PSEAE	sp|Q9HU65|GLNA_PSEAE	1	1	1	>sp|Q9HU65|GLNA_PSEAE Glutamine synthetase OS=Pseudomonas aeruginosa (strain ATCC 15692 / PAO1 / 1C / PRS 101 / LMG 12228) GN=glnA PE=1 SV=1	1	1	1	1	2.6	2.6	2.6	51.944	469	469	0	10.444	14813000	2				76	118	TRUE	122	235;236	273;274	274
sp|Q9HUC8|SYR_PSEAE	sp|Q9HUC8|SYR_PSEAE	4	4	4	>sp|Q9HUC8|SYR_PSEAE Arginine--tRNA ligase OS=Pseudomonas aeruginosa (strain ATCC 15692 / PAO1 / 1C / PRS 101 / LMG 12228) GN=argS PE=3 SV=1	1	4	4	4	8	8	8	65.199	587	587	0	35.825	35637000	8				77	443;553;705;790	True;True;True;True	456;571;730;820	864;865;1070;1071;1449;1450;1613	1003;1004;1247;1248;1774;1775;1776;1979	1004;1248;1775;1979
sp|Q9HUM6|PURA_PSEAE	sp|Q9HUM6|PURA_PSEAE	3	3	3	>sp|Q9HUM6|PURA_PSEAE Adenylosuccinate synthetase OS=Pseudomonas aeruginosa (strain ATCC 15692 / PAO1 / 1C / PRS 101 / LMG 12228) GN=purA PE=3 SV=1	1	3	3	3	7.7	7.7	7.7	46.814	430	430	0	20.689	47051000	5				78	415;704;732	True;True;True	428;729;759	811;812;1447;1448;1505	942;943;1772;1773;1842	943;1772;1842
sp|Q9HV43|DNAK_PSEAE	sp|Q9HV43|DNAK_PSEAE	11	11	11	>sp|Q9HV43|DNAK_PSEAE Chaperone protein DnaK OS=Pseudomonas aeruginosa (strain ATCC 15692 / PAO1 / 1C / PRS 101 / LMG 12228) GN=dnaK PE=3 SV=1	1	11	11	11	21.5	21.5	21.5	68.402	637	637	0	149.28	263430000	24				79	0;17;52;61;184;186;425;444;537;550;672	True;True;True;True;True;True;True;True;True;True;True	0;17;53;62;193;195;438;457;552;567;568;696	0;1;2;32;33;105;121;122;371;372;375;376;826;827;866;867;1035;1036;1062;1063;1064;1065;1365	0;1;2;37;38;122;143;144;430;431;434;435;958;959;1005;1006;1204;1205;1237;1238;1239;1240;1658;1659	1;37;122;144;430;435;959;1006;1204;1240;1658	36	602
sp|Q9HV55|IF2_PSEAE	sp|Q9HV55|IF2_PSEAE	1	1	1	>sp|Q9HV55|IF2_PSEAE Translation initiation factor IF-2 OS=Pseudomonas aeruginosa (strain ATCC 15692 / PAO1 / 1C / PRS 101 / LMG 12228) GN=infB PE=3 SV=1	1	1	1	1	1.4	1.4	1.4	90.911	840	840	0	6.0898	6032000	2				80	313	TRUE	323	613;614	701;702	702
sp|Q9HV59|PNP_PSEAE	sp|Q9HV59|PNP_PSEAE	7	7	7	>sp|Q9HV59|PNP_PSEAE Polyribonucleotide nucleotidyltransferase OS=Pseudomonas aeruginosa (strain ATCC 15692 / PAO1 / 1C / PRS 101 / LMG 12228) GN=pnp PE=3 SV=1	1	7	7	7	11	11	11	75.452	701	701	0	57.268	144850000	14				81	26;75;85;144;361;471;799	True;True;True;True;True;True;True	26;76;87;149;374;485;829	49;50;150;151;170;171;289;290;713;714;921;922;1630;1631	56;57;175;176;195;196;336;337;824;825;1078;1079;1996;1997	56;175;196;337;824;1078;1996
sp|Q9HVC4|RL25_PSEAE	sp|Q9HVC4|RL25_PSEAE	4	4	4	>sp|Q9HVC4|RL25_PSEAE 50S ribosomal protein L25 OS=Pseudomonas aeruginosa (strain ATCC 15692 / PAO1 / 1C / PRS 101 / LMG 12228) GN=rplY PE=3 SV=1	1	4	4	4	32.8	32.8	32.8	21.962	204	204	0	36.29	137170000	10				82	131;284;457;754	True;True;True;True	136;294;470;783	263;264;554;555;894;895;1550;1551;1552;1553	304;305;640;641;1041;1042;1904;1905;1906;1907	304;640;1042;1905
sp|Q9HVD1|PAGL_PSEAE	sp|Q9HVD1|PAGL_PSEAE	2	2	2	>sp|Q9HVD1|PAGL_PSEAE Lipid A deacylase PagL OS=Pseudomonas aeruginosa (strain ATCC 15692 / PAO1 / 1C / PRS 101 / LMG 12228) GN=pagL PE=1 SV=1	1	2	2	2	14.5	14.5	14.5	18.393	173	173	0	15.126	16340000	3				83	180;765	True;True	189;795	364;1572;1573	423;1927;1928	423;1927
sp|Q9HVI7|GLYA3_PSEAE;sp|Q9I138|GLYA2_PSEAE	sp|Q9HVI7|GLYA3_PSEAE	3;1	3;1	3;1	>sp|Q9HVI7|GLYA3_PSEAE Serine hydroxymethyltransferase 3 OS=Pseudomonas aeruginosa (strain ATCC 15692 / PAO1 / 1C / PRS 101 / LMG 12228) GN=glyA2 PE=3 SV=1	2	3	3	3	6.2	6.2	6.2	45.157	417	417;418	0	18.78	39800000	4				84	333;666;735	True;True;True	344;689;762	653;654;1350;1351;1509;1510	749;750;1639;1640;1846;1847	750;1639;1847
sp|Q9HVL6|RL21_PSEAE	sp|Q9HVL6|RL21_PSEAE	2	2	2	>sp|Q9HVL6|RL21_PSEAE 50S ribosomal protein L21 OS=Pseudomonas aeruginosa (strain ATCC 15692 / PAO1 / 1C / PRS 101 / LMG 12228) GN=rplU PE=3 SV=1	1	2	2	2	20.4	20.4	20.4	11.653	103	103	0	11.484	43344000	1				85	330;796	True;True	341;826	648;1625;1626	744;1991;1992	744;1992
sp|Q9HVM4|SYI_PSEAE	sp|Q9HVM4|SYI_PSEAE	2	2	2	>sp|Q9HVM4|SYI_PSEAE Isoleucine--tRNA ligase OS=Pseudomonas aeruginosa (strain ATCC 15692 / PAO1 / 1C / PRS 101 / LMG 12228) GN=ileS PE=3 SV=1	1	2	2	2	2.3	2.3	2.3	105.46	943	943	0	10.929	6765800	0				86	222;440	True;True	232;453	444;858	511;997	511;997
sp|Q9HVN5|CLPB_PSEAE	sp|Q9HVN5|CLPB_PSEAE	5	5	3	>sp|Q9HVN5|CLPB_PSEAE Chaperone protein ClpB OS=Pseudomonas aeruginosa (strain ATCC 15692 / PAO1 / 1C / PRS 101 / LMG 12228) GN=clpB PE=3 SV=1	1	5	5	3	7.3	7.3	4.6	95.004	854	854	0	42.792	27238000	9				87	30;234;442;582;689	True;True;True;True;True	30;244;455;604;714	57;58;464;465;863;1187;1188;1422	65;66;67;533;534;1002;1442;1443;1747	67;534;1002;1442;1747
sp|Q9HVT8|GATA_PSEAE	sp|Q9HVT8|GATA_PSEAE	2	2	2	>sp|Q9HVT8|GATA_PSEAE Glutamyl-tRNA(Gln) amidotransferase subunit A OS=Pseudomonas aeruginosa (strain ATCC 15692 / PAO1 / 1C / PRS 101 / LMG 12228) GN=gatA PE=1 SV=1	1	2	2	2	6.8	6.8	6.8	51.862	484	484	0	13.227	5949000	2				88	459;808	True;True	472;838	898;1647;1648	1046;2017;2018	1046;2017
sp|Q9HVX6|SYW_PSEAE	sp|Q9HVX6|SYW_PSEAE	1	1	1	>sp|Q9HVX6|SYW_PSEAE Tryptophan--tRNA ligase OS=Pseudomonas aeruginosa (strain ATCC 15692 / PAO1 / 1C / PRS 101 / LMG 12228) GN=trpS PE=3 SV=1	1	1	1	1	2.9	2.9	2.9	48.961	448	448	0	10.667	8265700	2				89	429	TRUE	442	834;835	968;969	968
sp|Q9HVY3|RS9_PSEAE	sp|Q9HVY3|RS9_PSEAE	1	1	1	>sp|Q9HVY3|RS9_PSEAE 30S ribosomal protein S9 OS=Pseudomonas aeruginosa (strain ATCC 15692 / PAO1 / 1C / PRS 101 / LMG 12228) GN=rpsI PE=3 SV=1	1	1	1	1	7.7	7.7	7.7	14.615	130	130	0	6.973	13133000	2				90	64	TRUE	65	127;128	149;150	149
sp|Q9HW04|ARGJ_PSEAE	sp|Q9HW04|ARGJ_PSEAE	1	1	1	>sp|Q9HW04|ARGJ_PSEAE Arginine biosynthesis bifunctional protein ArgJ OS=Pseudomonas aeruginosa (strain ATCC 15692 / PAO1 / 1C / PRS 101 / LMG 12228) GN=argJ PE=3 SV=1	1	1	1	1	2.7	2.7	2.7	41.762	405	405	0	7.826	7334600	2				91	741	TRUE	769	1519;1520	1856;1857	1857
sp|Q9HW11|Y4395_PSEAE	sp|Q9HW11|Y4395_PSEAE	1	1	1	>sp|Q9HW11|Y4395_PSEAE UPF0234 protein PA4395 OS=Pseudomonas aeruginosa (strain ATCC 15692 / PAO1 / 1C / PRS 101 / LMG 12228) GN=PA4395 PE=3 SV=1	1	1	1	1	6.9	6.9	6.9	18.044	159	159	0	6.631	11692000	2				92	814	TRUE	844	1658;1659	2030;2031	2030
sp|Q9HWC5|RL11_PSEAE	sp|Q9HWC5|RL11_PSEAE	1	1	1	>sp|Q9HWC5|RL11_PSEAE 50S ribosomal protein L11 OS=Pseudomonas aeruginosa (strain ATCC 15692 / PAO1 / 1C / PRS 101 / LMG 12228) GN=rplK PE=3 SV=1	1	1	1	1	9.8	9.8	9.8	14.907	143	143	0	11.387	18284000	2				93	602	TRUE	624	1222;1223	1482;1483	1483
sp|Q9HWC6|RL1_PSEAE	sp|Q9HWC6|RL1_PSEAE	3	3	3	>sp|Q9HWC6|RL1_PSEAE 50S ribosomal protein L1 OS=Pseudomonas aeruginosa (strain ATCC 15692 / PAO1 / 1C / PRS 101 / LMG 12228) GN=rplA PE=3 SV=1	1	3	3	3	15.2	15.2	15.2	24.234	231	231	0	20.365	47569000	6				94	454;494;837	True;True;True	467;508;868	888;889;960;961;1706;1707	1034;1035;1121;1122;2090;2091	1034;1121;2091
sp|Q9HWC7|RL10_PSEAE	sp|Q9HWC7|RL10_PSEAE	4	4	4	>sp|Q9HWC7|RL10_PSEAE 50S ribosomal protein L10 OS=Pseudomonas aeruginosa (strain ATCC 15692 / PAO1 / 1C / PRS 101 / LMG 12228) GN=rplJ PE=3 SV=1	1	4	4	4	32.5	32.5	32.5	17.634	166	166	0	47.548	77810000	11				95	6;51;107;270	True;True;True;True	6;52;111;280	12;13;103;104;216;217;529;530	12;13;119;120;121;247;248;249;250;611;612	12;121;250;611
sp|Q9HWC8|RL7_PSEAE	sp|Q9HWC8|RL7_PSEAE	1	1	1	>sp|Q9HWC8|RL7_PSEAE 50S ribosomal protein L7/L12 OS=Pseudomonas aeruginosa (strain ATCC 15692 / PAO1 / 1C / PRS 101 / LMG 12228) GN=rplL PE=3 SV=1	1	1	1	1	9	9	9	12.479	122	122	0	6.1992	99312000	3				96	111	TRUE	115	222;223	255;256;257	256
sp|Q9HWC9|RPOC_PSEAE	sp|Q9HWC9|RPOC_PSEAE	16	16	16	>sp|Q9HWC9|RPOC_PSEAE DNA-directed RNA polymerase subunit beta OS=Pseudomonas aeruginosa (strain ATCC 15692 / PAO1 / 1C / PRS 101 / LMG 12228) GN=rpoC PE=3 SV=1	1	16	16	16	14.4	14.4	14.4	154.38	1399	1399	0	120.39	238500000	27				97	15;130;145;224;226;262;329;436;455;490;495;584;636;797;825;872	True;True;True;True;True;True;True;True;True;True;True;True;True;True;True;True	15;135;150;234;236;272;340;449;468;504;509;606;659;827;855;903	29;261;262;291;447;448;450;517;646;647;849;850;890;891;951;952;962;963;1191;1192;1292;1293;1627;1628;1681;1682;1781	34;302;303;338;514;515;517;599;742;743;987;988;1036;1037;1111;1112;1123;1124;1446;1447;1570;1571;1572;1993;1994;2058;2059;2190	34;302;338;514;517;599;742;988;1036;1111;1123;1446;1570;1994;2059;2190
sp|Q9HWD1|RS7_PSEAE	sp|Q9HWD1|RS7_PSEAE	1	1	1	>sp|Q9HWD1|RS7_PSEAE 30S ribosomal protein S7 OS=Pseudomonas aeruginosa (strain ATCC 15692 / PAO1 / 1C / PRS 101 / LMG 12228) GN=rpsG PE=3 SV=1	1	1	1	1	7.7	7.7	7.7	17.504	156	156	0	6.9623	25396000	2				98	401	TRUE	414	785;786	913;914	914
sp|Q9HWD2|EFG1_PSEAE;sp|Q9I244|EFG2_PSEAE	sp|Q9HWD2|EFG1_PSEAE	17;5	17;5	17;5	>sp|Q9HWD2|EFG1_PSEAE Elongation factor G 1 OS=Pseudomonas aeruginosa (strain ATCC 15692 / PAO1 / 1C / PRS 101 / LMG 12228) GN=fusA PE=1 SV=1	2	17	17	17	32.4	32.4	32.4	77.784	706	706;702	0	175.37	561260000	43				99	29;38;102;157;206;260;287;310;407;434;522;525;560;792;845;855;874	True;True;True;True;True;True;True;True;True;True;True;True;True;True;True;True;True	29;38;39;104;164;216;270;297;320;420;447;536;539;578;822;876;886;905	55;56;75;76;77;78;204;314;315;416;417;513;514;559;560;608;609;794;795;845;846;1008;1009;1014;1123;1124;1615;1616;1617;1618;1721;1722;1740;1741;1784;1785	62;63;64;87;88;89;90;91;92;235;367;368;481;482;593;594;595;645;646;696;697;922;923;982;983;984;1177;1178;1183;1362;1363;1981;1982;1983;1984;2105;2106;2129;2130;2131;2132;2195;2196	62;91;235;368;482;593;646;697;923;982;1178;1183;1362;1984;2105;2131;2195	37	388
sp|Q9HWD5|RL3_PSEAE	sp|Q9HWD5|RL3_PSEAE	2	2	2	>sp|Q9HWD5|RL3_PSEAE 50S ribosomal protein L3 OS=Pseudomonas aeruginosa (strain ATCC 15692 / PAO1 / 1C / PRS 101 / LMG 12228) GN=rplC PE=3 SV=1	1	2	2	2	13.3	13.3	13.3	22.591	211	211	0	16.666	68899000	4				100	218;831	True;True	228;862	436;437;1695;1696	503;504;2076;2077	504;2076
sp|Q9HWD6|RL4_PSEAE	sp|Q9HWD6|RL4_PSEAE	1	1	1	>sp|Q9HWD6|RL4_PSEAE 50S ribosomal protein L4 OS=Pseudomonas aeruginosa (strain ATCC 15692 / PAO1 / 1C / PRS 101 / LMG 12228) GN=rplD PE=3 SV=1	1	1	1	1	4	4	4	21.64	200	200	0	6.4955	10406000	2				101	647	TRUE	670	1315;1316;1317	1596;1597;1598	1596
sp|Q9HWD8|RL2_PSEAE	sp|Q9HWD8|RL2_PSEAE	6	6	6	>sp|Q9HWD8|RL2_PSEAE 50S ribosomal protein L2 OS=Pseudomonas aeruginosa (strain ATCC 15692 / PAO1 / 1C / PRS 101 / LMG 12228) GN=rplB PE=3 SV=1	1	6	6	6	31.5	31.5	31.5	29.579	273	273	0	48.926	157460000	10				102	98;216;280;282;563;629	True;True;True;True;True;True	100;226;290;292;581;652	195;196;197;198;433;548;549;551;552;1129;1276	226;227;228;229;500;634;635;637;638;1368;1552	229;500;635;638;1368;1552
sp|Q9HWE0|RL22_PSEAE	sp|Q9HWE0|RL22_PSEAE	1	1	1	>sp|Q9HWE0|RL22_PSEAE 50S ribosomal protein L22 OS=Pseudomonas aeruginosa (strain ATCC 15692 / PAO1 / 1C / PRS 101 / LMG 12228) GN=rplV PE=3 SV=1	1	1	1	1	11.8	11.8	11.8	11.911	110	110	0	8.0433	20494000	2				103	766	TRUE	796	1574;1575	1929;1930	1930
sp|Q9HWE1|RS3_PSEAE	sp|Q9HWE1|RS3_PSEAE	1	1	1	>sp|Q9HWE1|RS3_PSEAE 30S ribosomal protein S3 OS=Pseudomonas aeruginosa (strain ATCC 15692 / PAO1 / 1C / PRS 101 / LMG 12228) GN=rpsC PE=3 SV=1	1	1	1	1	4.8	4.8	4.8	25.838	228	228	0	8.4485	4715800	3				104	591	TRUE	613	1204;1205	1462;1463;1464	1464
sp|Q9HWE2|RL16_PSEAE	sp|Q9HWE2|RL16_PSEAE	2	2	2	>sp|Q9HWE2|RL16_PSEAE 50S ribosomal protein L16 OS=Pseudomonas aeruginosa (strain ATCC 15692 / PAO1 / 1C / PRS 101 / LMG 12228) GN=rplP PE=3 SV=1	1	2	2	2	13.1	13.1	13.1	15.401	137	137	0	11.768	50690000	4				105	482;824	True;True	496;854	939;940;1679;1680	1099;1100;2056;2057	1099;2056
sp|Q9HWE4|RS17_PSEAE	sp|Q9HWE4|RS17_PSEAE	2	2	2	>sp|Q9HWE4|RS17_PSEAE 30S ribosomal protein S17 OS=Pseudomonas aeruginosa (strain ATCC 15692 / PAO1 / 1C / PRS 101 / LMG 12228) GN=rpsQ PE=3 SV=1	1	2	2	2	20.5	20.5	20.5	10.086	88	88	0	14.614	51407000	5				106	113;322	True;True	117;333	225;226;633;634	259;260;261;728;729	261;728
sp|Q9HWE5|RL14_PSEAE	sp|Q9HWE5|RL14_PSEAE	2	2	2	>sp|Q9HWE5|RL14_PSEAE 50S ribosomal protein L14 OS=Pseudomonas aeruginosa (strain ATCC 15692 / PAO1 / 1C / PRS 101 / LMG 12228) GN=rplN PE=3 SV=1	1	2	2	2	17.2	17.2	17.2	13.412	122	122	0	14.785	55119000	4				107	183;856	True;True	192;887	369;370;1742;1743	428;429;2133;2134	428;2133
sp|Q9HWE6|RL24_PSEAE	sp|Q9HWE6|RL24_PSEAE	1	1	1	>sp|Q9HWE6|RL24_PSEAE 50S ribosomal protein L24 OS=Pseudomonas aeruginosa (strain ATCC 15692 / PAO1 / 1C / PRS 101 / LMG 12228) GN=rplX PE=3 SV=1	1	1	1	1	9.6	9.6	9.6	11.47	104	104	0	6.9116	29465000	2				108	515	TRUE	529	999;1000	1167;1168	1168
sp|Q9HWE8|RS14_PSEAE	sp|Q9HWE8|RS14_PSEAE	2	2	2	>sp|Q9HWE8|RS14_PSEAE 30S ribosomal protein S14 OS=Pseudomonas aeruginosa (strain ATCC 15692 / PAO1 / 1C / PRS 101 / LMG 12228) GN=rpsN PE=3 SV=1	1	2	2	2	21.8	21.8	21.8	11.565	101	101	0	13.652	55666000	4				109	48;851	True;True	49;882	98;99;1733;1734	114;115;2122;2123	115;2122
sp|Q9HWE9|RS8_PSEAE	sp|Q9HWE9|RS8_PSEAE	2	2	2	>sp|Q9HWE9|RS8_PSEAE 30S ribosomal protein S8 OS=Pseudomonas aeruginosa (strain ATCC 15692 / PAO1 / 1C / PRS 101 / LMG 12228) GN=rpsH PE=3 SV=1	1	2	2	2	18.5	18.5	18.5	14.17	130	130	0	12.857	30661000	3				110	240;662	True;True	250;685	477;1343;1344	548;1632;1633	548;1632
sp|Q9HWF0|RL6_PSEAE	sp|Q9HWF0|RL6_PSEAE	2	2	2	>sp|Q9HWF0|RL6_PSEAE 50S ribosomal protein L6 OS=Pseudomonas aeruginosa (strain ATCC 15692 / PAO1 / 1C / PRS 101 / LMG 12228) GN=rplF PE=3 SV=1	1	2	2	2	13.6	13.6	13.6	19.099	177	177	0	11.818	34866000	4				111	402;771	True;True	415;801	787;1582;1583	915;1939;1940;1941	915;1941
sp|Q9HWF2|RS5_PSEAE	sp|Q9HWF2|RS5_PSEAE	3	3	3	>sp|Q9HWF2|RS5_PSEAE 30S ribosomal protein S5 OS=Pseudomonas aeruginosa (strain ATCC 15692 / PAO1 / 1C / PRS 101 / LMG 12228) GN=rpsE PE=3 SV=1	1	3	3	3	26.5	26.5	26.5	17.625	166	166	0	32.203	36098000	6				112	108;578;844	True;True;True	112;596;597;875	218;1171;1172;1173;1719;1720	251;1417;1418;1419;2103;2104	251;1418;2103	38	148
sp|Q9HWF3|RL30_PSEAE	sp|Q9HWF3|RL30_PSEAE	1	1	1	>sp|Q9HWF3|RL30_PSEAE 50S ribosomal protein L30 OS=Pseudomonas aeruginosa (strain ATCC 15692 / PAO1 / 1C / PRS 101 / LMG 12228) GN=rpmD PE=1 SV=3	1	1	1	1	24.1	24.1	24.1	6.4775	58	58	0	7.523	5430100	2				113	355	TRUE	368	704;705	813;814	813
sp|Q9HWF4|RL15_PSEAE	sp|Q9HWF4|RL15_PSEAE	2	2	2	>sp|Q9HWF4|RL15_PSEAE 50S ribosomal protein L15 OS=Pseudomonas aeruginosa (strain ATCC 15692 / PAO1 / 1C / PRS 101 / LMG 12228) GN=rplO PE=3 SV=1	1	2	2	2	16	16	16	15.174	144	144	0	21.704	43988000	5				114	119;751	True;True	123;780	237;238;239;1544;1545	275;276;277;1898;1899	275;1898
sp|Q9HWF7|RS13_PSEAE	sp|Q9HWF7|RS13_PSEAE	2	2	2	>sp|Q9HWF7|RS13_PSEAE 30S ribosomal protein S13 OS=Pseudomonas aeruginosa (strain ATCC 15692 / PAO1 / 1C / PRS 101 / LMG 12228) GN=rpsM PE=3 SV=1	1	2	2	2	19.5	19.5	19.5	13.265	118	118	0	13.122	13667000	3				115	305;341	True;True	315;353	600;601;672	688;689;776	688;776
sp|Q9HWX5|RISB_PSEAE	sp|Q9HWX5|RISB_PSEAE	1	1	1	>sp|Q9HWX5|RISB_PSEAE 6,7-dimethyl-8-ribityllumazine synthase OS=Pseudomonas aeruginosa (strain ATCC 15692 / PAO1 / 1C / PRS 101 / LMG 12228) GN=ribH PE=3 SV=1	1	1	1	1	8.2	8.2	8.2	16.413	158	158	0	6.8975	10290000	2				116	77	TRUE	79	155;156	180;181	180
sp|Q9HWZ6|IPYR_PSEAE	sp|Q9HWZ6|IPYR_PSEAE	1	1	1	>sp|Q9HWZ6|IPYR_PSEAE Inorganic pyrophosphatase OS=Pseudomonas aeruginosa (strain ATCC 15692 / PAO1 / 1C / PRS 101 / LMG 12228) GN=ppa PE=1 SV=1	1	1	1	1	10.3	10.3	10.3	19.396	175	175	0	6.6172	9909200	1				117	91	TRUE	93	181	208	208
sp|Q9HX33|SYL_PSEAE	sp|Q9HX33|SYL_PSEAE	2	2	2	>sp|Q9HX33|SYL_PSEAE Leucine--tRNA ligase OS=Pseudomonas aeruginosa (strain ATCC 15692 / PAO1 / 1C / PRS 101 / LMG 12228) GN=leuS PE=3 SV=1	1	2	2	2	3.4	3.4	3.4	97.647	873	873	0	17.185	70592000	3				118	246;593	True;True	256;615	489;1208;1209	565;1467;1468	565;1467	39	68
sp|Q9HXM6|GUAA_PSEAE	sp|Q9HXM6|GUAA_PSEAE	3	3	3	>sp|Q9HXM6|GUAA_PSEAE GMP synthase [glutamine-hydrolyzing] OS=Pseudomonas aeruginosa (strain ATCC 15692 / PAO1 / 1C / PRS 101 / LMG 12228) GN=guaA PE=3 SV=1	1	3	3	3	5.7	5.7	5.7	57.959	525	525	0	19.369	34912000	4				119	82;338;846	True;True;True	84;349;877	164;165;664;1723	189;190;760;2107	190;760;2107
sp|Q9HXP9|RS16_PSEAE	sp|Q9HXP9|RS16_PSEAE	1	1	1	>sp|Q9HXP9|RS16_PSEAE 30S ribosomal protein S16 OS=Pseudomonas aeruginosa (strain ATCC 15692 / PAO1 / 1C / PRS 101 / LMG 12228) GN=rpsP PE=3 SV=1	1	1	1	1	16.9	16.9	16.9	9.2043	83	83	0	6.8196	15943000	3				120	324	TRUE	335	636;637	731;732;733	733
sp|Q9HXZ2|ACCA_PSEAE	sp|Q9HXZ2|ACCA_PSEAE	2	2	2	>sp|Q9HXZ2|ACCA_PSEAE Acetyl-coenzyme A carboxylase carboxyl transferase subunit alpha OS=Pseudomonas aeruginosa (strain ATCC 15692 / PAO1 / 1C / PRS 101 / LMG 12228) GN=accA PE=1 SV=1	1	2	2	2	9.2	9.2	9.2	34.947	316	316	0	16.527	7911500	3				121	511;533	True;True	525;547	993;1026;1027	1160;1195;1196	1160;1195
sp|Q9HXZ4|PYRG_PSEAE	sp|Q9HXZ4|PYRG_PSEAE	1	1	1	>sp|Q9HXZ4|PYRG_PSEAE CTP synthase OS=Pseudomonas aeruginosa (strain ATCC 15692 / PAO1 / 1C / PRS 101 / LMG 12228) GN=pyrG PE=3 SV=1	1	1	1	1	3.1	3.1	3.1	59.617	542	542	0	8.0709	27309000	2				122	366	TRUE	379	721;722	834;835	835
sp|Q9HXZ5|ENO_PSEAE	sp|Q9HXZ5|ENO_PSEAE	4	4	4	>sp|Q9HXZ5|ENO_PSEAE Enolase OS=Pseudomonas aeruginosa (strain ATCC 15692 / PAO1 / 1C / PRS 101 / LMG 12228) GN=eno PE=3 SV=1	1	4	4	4	10.3	10.3	10.3	45.195	429	429	0	31.836	72882000	7				123	2;105;253;819	True;True;True;True	2;109;263;849	5;6;212;213;500;1670;1671	5;6;243;244;577;2047;2048	6;244;577;2048
sp|Q9HY84|ASSY_PSEAE	sp|Q9HY84|ASSY_PSEAE	2	2	2	>sp|Q9HY84|ASSY_PSEAE Argininosuccinate synthase OS=Pseudomonas aeruginosa (strain ATCC 15692 / PAO1 / 1C / PRS 101 / LMG 12228) GN=argG PE=3 SV=1	1	2	2	2	8.1	8.1	8.1	45.297	405	405	0	12.677	24684000	3				124	137;445	True;True	142;458	274;868;869	318;1007;1008	318;1008
sp|Q9HYC7|SYM_PSEAE	sp|Q9HYC7|SYM_PSEAE	1	1	1	>sp|Q9HYC7|SYM_PSEAE Methionine--tRNA ligase OS=Pseudomonas aeruginosa (strain ATCC 15692 / PAO1 / 1C / PRS 101 / LMG 12228) GN=metG PE=3 SV=1	1	1	1	1	1.3	1.3	1.3	74.903	677	677	0	6.2033	6525000	2				125	478	TRUE	492	931;932	1089;1090	1089
sp|Q9HZ71|RS1_PSEAE	sp|Q9HZ71|RS1_PSEAE	7	7	7	>sp|Q9HZ71|RS1_PSEAE 30S ribosomal protein S1 OS=Pseudomonas aeruginosa (strain ATCC 15692 / PAO1 / 1C / PRS 101 / LMG 12228) GN=rpsA PE=3 SV=1	1	7	7	7	17.4	17.4	17.4	61.869	559	559	0	73.488	128530000	9				126	152;237;393;615;665;681;764	True;True;True;True;True;True;True	159;247;406;637;688;706;794	307;308;471;472;770;771;1247;1348;1349;1407;1408;1570;1571	360;361;540;541;892;893;1513;1637;1638;1727;1728;1925;1926	360;541;893;1513;1638;1727;1926
sp|Q9HZE0|DHE2_PSEAE	sp|Q9HZE0|DHE2_PSEAE	15	15	15	>sp|Q9HZE0|DHE2_PSEAE NAD-specific glutamate dehydrogenase OS=Pseudomonas aeruginosa (strain ATCC 15692 / PAO1 / 1C / PRS 101 / LMG 12228) GN=gdhB PE=1 SV=1	1	15	15	15	10.6	10.6	10.6	182.64	1620	1620	0	100.11	264510000	22				127	14;49;59;135;162;279;452;468;513;661;696;793;829;836;883	True;True;True;True;True;True;True;True;True;True;True;True;True;True;True	14;50;60;140;169;289;465;482;527;684;721;823;860;867;914	27;28;100;101;118;119;271;327;328;546;547;883;884;917;996;1342;1434;1435;1619;1620;1691;1692;1704;1705;1801;1802	32;33;116;117;140;141;315;380;381;632;633;1025;1026;1072;1163;1631;1759;1760;1985;1986;2072;2073;2087;2088;2089;2216;2217	32;117;140;315;380;632;1025;1072;1163;1631;1759;1986;2073;2088;2216
sp|Q9HZP5|ETFD_PSEAE	sp|Q9HZP5|ETFD_PSEAE	3	3	3	>sp|Q9HZP5|ETFD_PSEAE Electron transfer flavoprotein-ubiquinone oxidoreductase OS=Pseudomonas aeruginosa (strain ATCC 15692 / PAO1 / 1C / PRS 101 / LMG 12228) GN=PA2953 PE=1 SV=1	1	3	3	3	6.4	6.4	6.4	59.928	551	551	0	17.735	19540000	4				128	67;810;879	True;True;True	68;840;910	133;134;1651;1652;1794	155;156;2021;2022;2209	155;2021;2209
sp|Q9HZP6|ETFB_PSEAE	sp|Q9HZP6|ETFB_PSEAE	3	3	3	>sp|Q9HZP6|ETFB_PSEAE Electron transfer flavoprotein subunit beta OS=Pseudomonas aeruginosa (strain ATCC 15692 / PAO1 / 1C / PRS 101 / LMG 12228) GN=etfB PE=3 SV=1	1	3	3	3	17.7	17.7	17.7	26.376	249	249	0	23.535	41485000	4				129	50;112;755	True;True;True	51;116;784	102;224;1554;1555	118;258;1908;1909	118;258;1908
sp|Q9HZZ2|EFP_PSEAE	sp|Q9HZZ2|EFP_PSEAE	3	3	3	>sp|Q9HZZ2|EFP_PSEAE Elongation factor P OS=Pseudomonas aeruginosa (strain ATCC 15692 / PAO1 / 1C / PRS 101 / LMG 12228) GN=efp PE=1 SV=1	1	3	3	3	19.7	19.7	19.7	20.985	188	188	0	26.09	56082000	5				130	12;574;779	True;True;True	12;592;809	24;25;1163;1164;1595	29;30;1409;1410;1956	29;1410;1956
sp|Q9I0J6|NUOG_PSEAE	sp|Q9I0J6|NUOG_PSEAE	2	2	2	>sp|Q9I0J6|NUOG_PSEAE NADH-quinone oxidoreductase subunit G OS=Pseudomonas aeruginosa (strain ATCC 15692 / PAO1 / 1C / PRS 101 / LMG 12228) GN=nuoG PE=3 SV=1	1	2	2	2	2.8	2.8	2.8	98.999	905	905	0	11.08	5476400	2				131	360;838	True;True	373;869	712;1708	823;2092	823;2092
sp|Q9I0K4|ACEA_PSEAE	sp|Q9I0K4|ACEA_PSEAE	2	2	2	>sp|Q9I0K4|ACEA_PSEAE Isocitrate lyase OS=Pseudomonas aeruginosa (strain ATCC 15692 / PAO1 / 1C / PRS 101 / LMG 12228) GN=PA2634 PE=1 SV=1	1	2	2	2	4.5	4.5	4.5	58.886	531	531	0	16.814	28554000	5				132	163;830	True;True	170;861	329;330;1693;1694	382;383;384;2074;2075	383;2074
sp|Q9I0Q0|PQSH_PSEAE	sp|Q9I0Q0|PQSH_PSEAE	1	1	1	>sp|Q9I0Q0|PQSH_PSEAE 2-heptyl-3-hydroxy-4(1H)-quinolone synthase OS=Pseudomonas aeruginosa (strain ATCC 15692 / PAO1 / 1C / PRS 101 / LMG 12228) GN=pqsH PE=3 SV=1	1	1	1	1	2.6	2.6	2.6	42.081	382	382	0	6.4398	2580500	2				133	42	TRUE	43	84;85	100;101	101
sp|Q9I137|GCSP1_PSEAE	sp|Q9I137|GCSP1_PSEAE	1	1	1	>sp|Q9I137|GCSP1_PSEAE Glycine dehydrogenase (decarboxylating) 1 OS=Pseudomonas aeruginosa (strain ATCC 15692 / PAO1 / 1C / PRS 101 / LMG 12228) GN=gcvP1 PE=3 SV=1	1	1	1	1	0.7	0.7	0.7	103.92	959	959	0	6.0926	16629000	2				134	489	TRUE	503	949;950	1109;1110	1110
sp|Q9I1L9|DLDH1_PSEAE	sp|Q9I1L9|DLDH1_PSEAE	2	2	2	>sp|Q9I1L9|DLDH1_PSEAE Dihydrolipoyl dehydrogenase OS=Pseudomonas aeruginosa (strain ATCC 15692 / PAO1 / 1C / PRS 101 / LMG 12228) GN=lpdV PE=1 SV=1	1	2	2	2	5.6	5.6	5.6	48.588	464	464	0	14.161	19911000	3				135	65;778	True;True	66;808	129;130;1594	151;152;1955	151;1955
sp|Q9I1M0|ODB2_PSEAE	sp|Q9I1M0|ODB2_PSEAE	1	1	1	>sp|Q9I1M0|ODB2_PSEAE Lipoamide acyltransferase component of branched-chain alpha-keto acid dehydrogenase complex OS=Pseudomonas aeruginosa (strain ATCC 15692 / PAO1 / 1C / PRS 101 / LMG 12228) GN=bkdB PE=1 SV=1	1	1	1	1	2.8	2.8	2.8	45.774	428	428	0	6.7404	2497600	3				136	261	TRUE	271	515;516	596;597;598	597
sp|Q9I2A8|ATOB_PSEAE	sp|Q9I2A8|ATOB_PSEAE	6	6	6	>sp|Q9I2A8|ATOB_PSEAE Acetyl-CoA acetyltransferase OS=Pseudomonas aeruginosa (strain ATCC 15692 / PAO1 / 1C / PRS 101 / LMG 12228) GN=atoB PE=3 SV=1	1	6	6	6	17	17	17	40.405	393	393	0	41.714	150470000	10				137	62;63;156;205;542;800	True;True;True;True;True;True	63;64;163;215;557;830	123;124;125;126;313;414;415;1046;1632;1633;1634	145;146;147;148;366;479;480;1216;1998;1999;2000	145;147;366;479;1216;2000
sp|Q9I2U0|CLPX_PSEAE	sp|Q9I2U0|CLPX_PSEAE	1	1	1	>sp|Q9I2U0|CLPX_PSEAE ATP-dependent Clp protease ATP-binding subunit ClpX OS=Pseudomonas aeruginosa (strain ATCC 15692 / PAO1 / 1C / PRS 101 / LMG 12228) GN=clpX PE=3 SV=1	1	1	1	1	2.3	2.3	2.3	46.991	426	426	0	6.3511	7241900	2				138	191	TRUE	201	385;386	444;445	444
sp|Q9I2U1|CLPP1_PSEAE	sp|Q9I2U1|CLPP1_PSEAE	1	1	1	>sp|Q9I2U1|CLPP1_PSEAE ATP-dependent Clp protease proteolytic subunit 1 OS=Pseudomonas aeruginosa (strain ATCC 15692 / PAO1 / 1C / PRS 101 / LMG 12228) GN=clpP1 PE=3 SV=1	1	1	1	1	8.5	8.5	8.5	23.502	213	213	0	6.0846	7188000	0				139	472	TRUE	486	923	1080	1080
sp|Q9I2V5|ACNB_PSEAE	sp|Q9I2V5|ACNB_PSEAE	15	15	15	>sp|Q9I2V5|ACNB_PSEAE Aconitate hydratase B OS=Pseudomonas aeruginosa (strain ATCC 15692 / PAO1 / 1C / PRS 101 / LMG 12228) GN=acnB PE=3 SV=1	1	15	15	15	21.5	21.5	21.5	93.627	869	869	0	111.79	417070000	36				140	25;41;124;248;298;363;481;488;532;548;700;719;811;820;877	True;True;True;True;True;True;True;True;True;True;True;True;True;True;True	25;42;128;258;308;376;495;502;546;565;725;744;841;850;908	47;48;82;83;248;249;491;492;584;585;717;718;937;938;947;948;1024;1025;1059;1441;1478;1479;1653;1654;1672;1673;1790;1791	54;55;98;99;287;288;567;568;672;673;828;829;830;831;1095;1096;1097;1098;1107;1108;1193;1194;1234;1766;1812;1813;2023;2024;2025;2026;2049;2050;2203;2204;2205;2206	55;98;288;568;673;829;1098;1108;1193;1234;1766;1812;2026;2049;2203	40	423
sp|Q9I3C5|HTPG_PSEAE	sp|Q9I3C5|HTPG_PSEAE	1	1	1	>sp|Q9I3C5|HTPG_PSEAE Chaperone protein HtpG OS=Pseudomonas aeruginosa (strain ATCC 15692 / PAO1 / 1C / PRS 101 / LMG 12228) GN=htpG PE=3 SV=1	1	1	1	1	2.7	2.7	2.7	71.667	634	634	0	9.552	8283600	2				141	185	TRUE	194	373;374	432;433	432
sp|Q9I3D1|DLDH2_PSEAE	sp|Q9I3D1|DLDH2_PSEAE	8	8	8	>sp|Q9I3D1|DLDH2_PSEAE Dihydrolipoyl dehydrogenase OS=Pseudomonas aeruginosa (strain ATCC 15692 / PAO1 / 1C / PRS 101 / LMG 12228) GN=lpdG PE=3 SV=1	1	8	8	8	19	19	19	50.164	478	478	0	65.345	284750000	15				142	71;92;201;288;431;448;575;724	True;True;True;True;True;True;True;True	72;94;211;298;444;461;593;750	141;142;182;183;408;561;562;837;838;873;874;1165;1166;1489;1490	165;166;209;210;473;647;648;971;972;1013;1014;1411;1412;1826;1827	166;210;473;648;971;1014;1411;1826
sp|Q9I3F5|ACNA_PSEAE	sp|Q9I3F5|ACNA_PSEAE	7	7	7	>sp|Q9I3F5|ACNA_PSEAE Aconitate hydratase A OS=Pseudomonas aeruginosa (strain ATCC 15692 / PAO1 / 1C / PRS 101 / LMG 12228) GN=acnA PE=3 SV=1	1	7	7	7	11.2	11.2	11.2	99.147	910	910	0	53.791	116580000	11				143	258;316;357;403;461;795;882	True;True;True;True;True;True;True	268;326;370;416;474;825;913	510;619;620;707;708;788;901;902;1623;1624;1799;1800	590;707;708;816;817;916;1049;1050;1051;1989;1990;2214;2215	590;707;816;916;1051;1989;2215
sp|Q9I4G3|NAPA_PSEAE	sp|Q9I4G3|NAPA_PSEAE	2	2	2	>sp|Q9I4G3|NAPA_PSEAE Periplasmic nitrate reductase OS=Pseudomonas aeruginosa (strain ATCC 15692 / PAO1 / 1C / PRS 101 / LMG 12228) GN=napA PE=3 SV=1	1	2	2	2	2.3	2.3	2.3	92.974	829	829	0	12.442	5522500	2				144	475;712	True;True	489;737	927;1463	1085;1794	1085;1794
sp|Q9I4W3|DAPA_PSEAE	sp|Q9I4W3|DAPA_PSEAE	3	3	3	>sp|Q9I4W3|DAPA_PSEAE 4-hydroxy-tetrahydrodipicolinate synthase OS=Pseudomonas aeruginosa (strain ATCC 15692 / PAO1 / 1C / PRS 101 / LMG 12228) GN=dapA PE=1 SV=1	1	3	3	3	11.6	11.6	11.6	31.449	292	292	0	23.316	24099000	3				145	60;367;484	True;True;True	61;380;498	120;723;942;943	142;836;1102;1103	142;836;1103
sp|Q9I4Z4|PAL_PSEAE	sp|Q9I4Z4|PAL_PSEAE	2	2	2	>sp|Q9I4Z4|PAL_PSEAE Peptidoglycan-associated lipoprotein OS=Pseudomonas aeruginosa (strain ATCC 15692 / PAO1 / 1C / PRS 101 / LMG 12228) GN=pal PE=3 SV=1	1	2	2	2	16.1	16.1	16.1	17.925	168	168	0	13.12	11448000	2				146	171;839	True;True	180;870	346;347;1709	404;405;2093	405;2093
sp|Q9I502|SYP_PSEAE	sp|Q9I502|SYP_PSEAE	1	1	1	>sp|Q9I502|SYP_PSEAE Proline--tRNA ligase OS=Pseudomonas aeruginosa (strain ATCC 15692 / PAO1 / 1C / PRS 101 / LMG 12228) GN=proS PE=3 SV=1	1	1	1	1	2.3	2.3	2.3	63.103	571	571	0.0040984	5.7893	981420	1				147	832	TRUE	863	1697	2078	2078
sp|Q9I558|ACSA1_PSEAE	sp|Q9I558|ACSA1_PSEAE	2	2	2	>sp|Q9I558|ACSA1_PSEAE Acetyl-coenzyme A synthetase 1 OS=Pseudomonas aeruginosa (strain ATCC 15692 / PAO1 / 1C / PRS 101 / LMG 12228) GN=acsA1 PE=3 SV=1	1	2	2	2	4.5	4.5	4.5	71.762	651	651	0	11.396	24774000	3				148	526;737	True;True	540;764;765	1015;1512;1513	1184;1849;1850	1184;1849	41	550
sp|Q9I576|HPPD_PSEAE	sp|Q9I576|HPPD_PSEAE	3	3	3	>sp|Q9I576|HPPD_PSEAE 4-hydroxyphenylpyruvate dioxygenase OS=Pseudomonas aeruginosa (strain ATCC 15692 / PAO1 / 1C / PRS 101 / LMG 12228) GN=hpd PE=3 SV=1	1	3	3	3	10.9	10.9	10.9	39.912	357	357	0	32.441	78648000	5				149	272;556;738	True;True;True	282;574;766	533;1116;1117;1514;1515	615;1355;1356;1851;1852	615;1356;1852
sp|Q9I589|CBPD_PSEAE	sp|Q9I589|CBPD_PSEAE	2	2	2	>sp|Q9I589|CBPD_PSEAE Chitin-binding protein CbpD OS=Pseudomonas aeruginosa (strain ATCC 15692 / PAO1 / 1C / PRS 101 / LMG 12228) GN=cbpD PE=1 SV=1	1	2	2	2	5.7	5.7	5.7	41.916	389	389	0	13.822	29451000	4				150	88;868	True;True	90;899	175;176;1775;1776	200;201;2184;2185	200;2185
sp|Q9I5V8|RS21_PSEAE	sp|Q9I5V8|RS21_PSEAE	1	1	1	>sp|Q9I5V8|RS21_PSEAE 30S ribosomal protein S21 OS=Pseudomonas aeruginosa (strain ATCC 15692 / PAO1 / 1C / PRS 101 / LMG 12228) GN=rpsU PE=1 SV=3	1	1	1	1	16.9	16.9	16.9	8.4848	71	71	0	6.5621	17449000	2				151	783	TRUE	813	1602;1603	1965;1966	1965
sp|Q9I5Y1|ALF_PSEAE	sp|Q9I5Y1|ALF_PSEAE	3	3	3	>sp|Q9I5Y1|ALF_PSEAE Fructose-bisphosphate aldolase OS=Pseudomonas aeruginosa (strain ATCC 15692 / PAO1 / 1C / PRS 101 / LMG 12228) GN=fba PE=3 SV=1	1	3	3	3	11.6	11.6	11.6	38.573	354	354	0	19.963	17798000	7				152	172;195;210	True;True;True	181;205;220	348;349;393;394;423;424	406;407;408;452;453;488;489	408;453;489
sp|Q9I5Z0|METK_PSEAE	sp|Q9I5Z0|METK_PSEAE	4	4	4	>sp|Q9I5Z0|METK_PSEAE S-adenosylmethionine synthase OS=Pseudomonas aeruginosa (strain ATCC 15692 / PAO1 / 1C / PRS 101 / LMG 12228) GN=metK PE=3 SV=1	1	4	4	4	10.4	10.4	10.4	42.709	396	396	0	24.787	23234000	4				153	125;564;623;642	True;True;True;True	129;582;646;665	250;1130;1262;1304	289;1369;1535;1585	289;1369;1535;1585
sp|Q9I636|MASZ_PSEAE	sp|Q9I636|MASZ_PSEAE	2	2	2	>sp|Q9I636|MASZ_PSEAE Malate synthase G OS=Pseudomonas aeruginosa (strain ATCC 15692 / PAO1 / 1C / PRS 101 / LMG 12228) GN=glcB PE=3 SV=1	1	2	2	2	3.6	3.6	3.6	78.659	725	725	0	12.185	13890000	1				154	291;375	True;True	301;388	569;570;741	655;656;861	656;861
sp|Q9I685|SAHH_PSEAE	sp|Q9I685|SAHH_PSEAE	9	9	9	>sp|Q9I685|SAHH_PSEAE Adenosylhomocysteinase OS=Pseudomonas aeruginosa (strain ATCC 15692 / PAO1 / 1C / PRS 101 / LMG 12228) GN=ahcY PE=3 SV=1	1	9	9	9	23.2	23.2	23.2	51.399	469	469	0	66.161	251450000	20				155	227;336;391;500;514;559;736;804;854	True;True;True;True;True;True;True;True;True	237;347;404;514;528;577;763;834;885	451;452;658;659;660;661;767;768;972;973;997;998;1122;1511;1642;1643;1738;1739	518;519;754;755;756;757;889;890;1133;1134;1164;1165;1166;1361;1848;2009;2010;2011;2012;2127;2128	519;756;890;1133;1165;1361;1848;2010;2128
sp|Q9I6M4|DAVT_PSEAE	sp|Q9I6M4|DAVT_PSEAE	6	6	6	>sp|Q9I6M4|DAVT_PSEAE 5-aminovalerate aminotransferase DavT OS=Pseudomonas aeruginosa (strain ATCC 15692 / PAO1 / 1C / PRS 101 / LMG 12228) GN=davT PE=1 SV=1	1	6	6	6	18.3	18.3	18.3	45.22	426	426	0	40.736	147150000	9				156	28;46;286;680;709;772	True;True;True;True;True;True	28;47;296;705;734;802	53;54;92;93;557;558;1405;1406;1457;1458;1584;1585	60;61;108;109;643;644;1724;1725;1726;1788;1789;1942;1943	61;109;643;1724;1788;1942
sp|Q9I6M5|DAVD_PSEAE	sp|Q9I6M5|DAVD_PSEAE	3	3	3	>sp|Q9I6M5|DAVD_PSEAE Glutarate-semialdehyde dehydrogenase DavD OS=Pseudomonas aeruginosa (strain ATCC 15692 / PAO1 / 1C / PRS 101 / LMG 12228) GN=davD PE=1 SV=1	1	3	3	3	7.9	7.9	7.9	51.622	483	483	0	24.177	38184000	6				157	121;750;802	True;True;True	125;779;832	242;243;1542;1543;1638;1639	280;281;1896;1897;2005;2006	281;1897;2006
sp|Q9I747|HCP1_PSEAE	sp|Q9I747|HCP1_PSEAE	3	3	3	>sp|Q9I747|HCP1_PSEAE Protein hcp1 OS=Pseudomonas aeruginosa (strain ATCC 15692 / PAO1 / 1C / PRS 101 / LMG 12228) GN=hcp1 PE=1 SV=1	1	3	3	3	21	21	21	17.414	162	162	0	27.976	111900000	6				158	106;175;803	True;True;True	110;184;833	214;215;354;355;1640;1641	245;246;413;414;2007;2008	245;414;2008
sp|Q9I7C2|GYRB_PSEAE	sp|Q9I7C2|GYRB_PSEAE	1	1	1	>sp|Q9I7C2|GYRB_PSEAE DNA gyrase subunit B OS=Pseudomonas aeruginosa (strain ATCC 15692 / PAO1 / 1C / PRS 101 / LMG 12228) GN=gyrB PE=3 SV=1	1	1	1	1	1.7	1.7	1.7	90.188	806	806	0	7.6911	5065300	2				159	867	TRUE	898	1773;1774	2182;2183	2183
sp|Q9X2T1|THIO_PSEAE	sp|Q9X2T1|THIO_PSEAE	3	3	3	>sp|Q9X2T1|THIO_PSEAE Thioredoxin OS=Pseudomonas aeruginosa (strain ATCC 15692 / PAO1 / 1C / PRS 101 / LMG 12228) GN=trxA PE=3 SV=1	1	3	3	3	29.6	29.6	29.6	11.87	108	108	0	20.058	48201000	5				160	254;470;528	True;True;True	264;484;542	501;502;920;1018	578;579;580;1077;1187	580;1077;1187
sp|Q9XCL6|SYE_PSEAE	sp|Q9XCL6|SYE_PSEAE	1	1	1	>sp|Q9XCL6|SYE_PSEAE Glutamate--tRNA ligase OS=Pseudomonas aeruginosa (strain ATCC 15692 / PAO1 / 1C / PRS 101 / LMG 12228) GN=gltX PE=3 SV=2	1	1	1	1	2.4	2.4	2.4	56.749	494	494	0	6.4229	10464000	2				161	826	TRUE	856	1683;1684	2060;2061	2061
tr|G3XCT6|G3XCT6_PSEAE	tr|G3XCT6|G3XCT6_PSEAE	2	2	2	>tr|G3XCT6|G3XCT6_PSEAE Probable two-component sensor OS=Pseudomonas aeruginosa (strain ATCC 15692 / PAO1 / 1C / PRS 101 / LMG 12228) GN=PA1458 PE=4 SV=1	1	2	2	2	4.6	4.6	4.6	79.737	753	753	0	13.987	11802000	2				162	170;594	True;True	179;616	345;1210;1211	403;1469;1470	403;1469
tr|G3XD11|G3XD11_PSEAE	tr|G3XD11|G3XD11_PSEAE	4	4	4	>tr|G3XD11|G3XD11_PSEAE PhoP/Q and low Mg2+ inducible outer membrane protein H1 OS=Pseudomonas aeruginosa (strain ATCC 15692 / PAO1 / 1C / PRS 101 / LMG 12228) GN=oprH PE=4 SV=1	1	4	4	4	29	29	29	21.574	200	200	0	85.834	235040000	12				163	428;617;775;887	True;True;True;True	441;639;805;918	832;833;1250;1589;1590;1807;1808	964;965;966;967;1516;1947;1948;1949;2222;2223;2224;2225	966;1516;1949;2222
tr|Q9HT45|Q9HT45_PSEAE	tr|Q9HT45|Q9HT45_PSEAE	1	1	1	>tr|Q9HT45|Q9HT45_PSEAE Uncharacterized protein OS=Pseudomonas aeruginosa (strain ATCC 15692 / PAO1 / 1C / PRS 101 / LMG 12228) GN=PA5528 PE=4 SV=1	1	1	1	1	4.9	4.9	4.9	30.414	284	284	0.0041494	5.8244	4219300	0				164	87	TRUE	89	174	199	199
tr|Q9HTD1|Q9HTD1_PSEAE	tr|Q9HTD1|Q9HTD1_PSEAE	7	7	7	>tr|Q9HTD1|Q9HTD1_PSEAE Probable transcarboxylase subunit OS=Pseudomonas aeruginosa (strain ATCC 15692 / PAO1 / 1C / PRS 101 / LMG 12228) GN=PA5435 PE=4 SV=1	1	7	7	7	14	14	14	66.095	607	607	0	53.49	126690000	14				165	9;72;78;134;151;320;524	True;True;True;True;True;True;True	9;73;80;139;158;331;538	19;20;143;157;158;269;270;305;306;629;630;1012;1013	24;25;167;182;183;312;313;314;358;359;724;725;1181;1182	25;167;183;313;359;724;1181
tr|Q9HTD9|Q9HTD9_PSEAE	tr|Q9HTD9|Q9HTD9_PSEAE	6	6	6	>tr|Q9HTD9|Q9HTD9_PSEAE Alcohol dehydrogenase OS=Pseudomonas aeruginosa (strain ATCC 15692 / PAO1 / 1C / PRS 101 / LMG 12228) GN=adhA PE=1 SV=1	1	6	6	6	22.5	22.5	22.5	35.911	342	342	0	54.004	101630000	12				166	10;16;73;411;604;809	True;True;True;True;True;True	10;16;74;424;626;839	21;30;31;144;145;146;147;801;802;1226;1227;1649;1650	26;35;36;168;169;170;171;929;930;931;1486;1487;2019;2020	26;35;168;931;1487;2019
tr|Q9HTP2|Q9HTP2_PSEAE	tr|Q9HTP2|Q9HTP2_PSEAE	3	3	3	>tr|Q9HTP2|Q9HTP2_PSEAE Probable aldehyde dehydrogenase OS=Pseudomonas aeruginosa (strain ATCC 15692 / PAO1 / 1C / PRS 101 / LMG 12228) GN=PA5312 PE=3 SV=1	1	3	3	3	8.7	8.7	8.7	53.143	497	497	0	22.612	62753000	5				167	309;438;670	True;True;True	319;451;694	606;607;853;1361;1362	694;695;991;1652;1653	695;991;1653
tr|Q9HTW6|Q9HTW6_PSEAE	tr|Q9HTW6|Q9HTW6_PSEAE	1	1	1	>tr|Q9HTW6|Q9HTW6_PSEAE Aminopeptidase P OS=Pseudomonas aeruginosa (strain ATCC 15692 / PAO1 / 1C / PRS 101 / LMG 12228) GN=pepP PE=4 SV=1	1	1	1	1	2	2	2	49.71	444	444	0	6.203	1779200	2				168	463	TRUE	476	905;906	1054;1055	1054
tr|Q9HU11|Q9HU11_PSEAE	tr|Q9HU11|Q9HU11_PSEAE	6	6	6	>tr|Q9HU11|Q9HU11_PSEAE Uncharacterized protein OS=Pseudomonas aeruginosa (strain ATCC 15692 / PAO1 / 1C / PRS 101 / LMG 12228) GN=PA5178 PE=4 SV=1	1	6	6	6	46.2	46.2	46.2	15.46	145	145	0	60.831	110890000	9				169	350;380;386;769;773;774	True;True;True;True;True;True	363;393;399;799;803;804	694;695;750;751;759;1579;1586;1587;1588	801;802;870;871;879;1936;1944;1945;1946	802;871;879;1936;1945;1946
[truncated: 80 more rows]

## Sheet: 1-2 Sheet1
Protein IDs-C4HSL (full)
REV__tr|Q9I1U4|Q9I1U4_PSEAE
REV__tr|Q9I4Y7|Q9I4Y7_PSEAE
sp|G3XD76|DAPD_PSEAE
sp|G3XD94|UGND_PSEAE
sp|O50175|ASTB_PSEAE
[truncated: 256 more rows]

[truncated: 5 more sheets: 1-2 Sheet2, 1-3 proteinGroups C4HSL-1, 1-3 proteinGroups  Probe 12, 1-3 Sheet2, 1-3 Sheet3]
