# Supplementary material for: Short-chain reactive probes as tools to unravel the Pseudomonas aeruginosa quorum sensing regulon
Source: Royal Society of Chemistry journal article supplement (doi:10.1039/d0sc04444j), 2021-01-01
Supplement: d0sc04444j2.zip [file Experiment 2.xlsx]

## Sheet: Key
Experiment 2	Chemical proteomics with Probe 12: Identification of proteins after incubation and photoaffinity labeling with Probe 12 in wild-type P. aeruginosa strain PAO1
Experimental methods	Yellow, Green and Blue sheets are independent biological replicates: Bacteria were grown, harvested, lysed, the lysates were incubated with C4HSL/Probe 12 in triplicates and labeled, downstream processed, streptavidin affinity enriched and trypticaly digested on the same day. StageTips desalting was done on the next day and LC-MS/MS analysis was performed later
Excel sheets content
2-1 proteinGroups C4HSL-1	Experiment 2 repeat 1 Raw data results of C4HSL control labeling
2-1 proteinGroups Probe 12	Experiment 2 repeat 1 Raw data results of Probe 12 labeling
2-1 Sheet1	Experiment 2 repeat 1: C4HSL results and unique Probe 12 results (C4HSL hits are subtracted)
2-1 Sheet2	Experiment 2 repeat 1: Filtered data of proteins for Probe 12 labeling which retain razor+unique peptides requirement of >1 for each replicate (filled with green)
For Green and Blue sheets-same as above only repeat experiment number changes (2-2, 2-3)

## Sheet: 2-1 proteinGroups C4HSL-1
Protein IDs	Majority protein IDs	Peptide counts (all)	Peptide counts (razor+unique)	Peptide counts (unique)	Fasta headers	Number of proteins	Peptides	Razor + unique peptides	Unique peptides	Sequence coverage [%]	Unique + razor sequencecoverage [%]	Unique sequencecoverage [%]	Mol. weight [kDa]	Sequence length	Sequence lengths	Q-value	Score	Intensity	MS/MS Count	Only identified by site	Reverse	Potential contaminant	id	Peptide IDs	Peptide is razor	Mod. peptide IDs	Evidence IDs	MS/MS IDs	Best MS/MS	Oxidation (M) site IDs	Oxidation (M) site positions
CON__P00761	CON__P00761	4	4	4	>P00761 SWISS-PROT:P00761|TRYP_PIG Trypsin - Sus scrofa (Pig).	1	4	4	4	25.1	25.1	25.1	24.409	231	231	0	87.418	1649200000	169			+	0	105;129;150;233	True;True;True;True	114;115;139;160;248	220;221;222;223;224;225;226;279;280;281;282;283;284;285;286;325;326;327;520;521;522;523	583;584;585;586;587;588;589;590;591;592;593;594;595;596;597;598;599;600;601;602;603;604;605;606;607;608;609;610;611;612;613;614;615;616;617;618;619;620;621;798;799;800;801;802;803;804;805;806;807;808;809;810;811;812;813;814;815;816;817;818;819;820;821;822;823;824;825;826;827;828;829;830;831;832;833;834;835;836;837;838;839;840;841;842;843;844;845;846;847;848;849;850;851;852;853;967;968;969;970;971…	604;848;986;1532	0	94
CON__P02533;CON__P08779;CON__Q04695;CON__Q9QWL7;CON__A2A4G1;CON__Q9Z2K1;CON__Q3ZAW8;CON__P08727;CON__P19001;CON__Q6IFX2;CON__P19012	CON__P02533;CON__P08779;CON__Q04695;CON__Q9QWL7;CON__A2A4G1;CON__Q9Z2K1;CON__Q3ZAW8	4;3;2;2;2;2;2;1;1;1;1	3;2;2;2;1;1;1;1;1;1;1	3;2;2;2;1;1;1;1;1;1;1	>P02533 SWISS-PROT:P02533 Tax_Id=9606 Gene_Symbol=KRT14 Keratin, type I cytoskeletal 14;>P08779 SWISS-PROT:P08779 Tax_Id=9606 Gene_Symbol=KRT16 Keratin, type I cytoskeletal 16;>Q04695 SWISS-PROT:Q04695 Tax_Id=9606 Gene_Symbol=KRT17 Keratin, type I cytoskel	11	4	3	3	8.9	7	7	51.621	472	472;473;432;433;456;469;474;400;403;452;456	0	4.5306	2040200	5			+	1	33;65;241;254	True;True;True;False	35;70;256;270	69;128;129;553;579;580	229;331;332;333;1600;1708;1709;1710;1711;1712;1713;1714;1715	229;333;1600;1708
CON__P04264;CON__Q6IFZ6;CON__Q9R0H5;CON__Q6NXH9;CON__Q8BGZ7;CON__P50446;CON__Q7Z794	CON__P04264	18;2;1;1;1;1;1	18;2;1;1;1;1;1	11;0;0;0;0;0;0	>P04264 SWISS-PROT:P04264 Tax_Id=9606 Gene_Symbol=KRT1 Keratin, type II cytoskeletal 1	7	18	18	11	32.3	32.3	21.1	66.017	644	644;572;524;539;551;553;578	0	166.58	128720000	88			+	2	9;52;55;68;78;100;122;139;148;169;172;186;204;208;223;226;227;263	True;True;True;True;True;True;True;True;True;True;True;True;True;True;True;True;True;True	10;55;58;59;73;83;108;132;149;158;181;184;185;199;218;222;238;241;242;279	21;22;105;106;110;111;112;134;147;148;209;269;311;312;323;367;368;372;373;374;375;399;400;432;433;441;442;506;509;510;511;512;605;606;607	95;96;97;98;99;100;101;285;286;287;288;289;295;296;297;298;299;300;301;342;343;344;345;346;347;348;374;375;548;549;778;779;942;943;944;945;946;965;1147;1148;1149;1154;1155;1156;1157;1158;1159;1160;1202;1203;1204;1205;1206;1207;1269;1270;1271;1272;1273;1274;1275;1276;1277;1288;1289;1290;1291;1498;1501;1502;1503;1504;1505;1506;1507;1508;1509;1510;1511;1512;1787;1788;1789;1790;1791;1792;1793;1794;17…	98;286;295;343;374;549;779;945;965;1149;1157;1203;1270;1289;1498;1502;1511;1793	1;2;3	259;262;469
CON__P07477	CON__P07477	1	1	1	>P07477 SWISS-PROT:P07477 Tax_Id=9606 Gene_Symbol=PRSS1 Trypsin-1 precursor	1	1	1	1	8.1	8.1	8.1	26.558	247	247	0	1.4177	49728000	9			+	3	130	TRUE	140	287;288	854;855;856;857;858;859;860;861;862	856
CON__P13645;CON__P02535-1;CON__Q7Z3Z0;CON__Q7Z3Y8;CON__Q148H6;CON__Q7Z3Y7;CON__ENSEMBL:ENSP00000377550;CON__P08730-1;CON__P13646-1;CON__Q7Z3Y9;CON__Q2M2I5	CON__P13645	20;6;2;2;2;2;1;1;1;1;1	20;6;2;2;2;2;1;1;1;1;1	19;5;1;1;1;1;1;1;1;0;1	>P13645 SWISS-PROT:P13645 Tax_Id=9606 Gene_Symbol=KRT10 Keratin, type I cytoskeletal 10	11	20	20	19	35.2	35.2	33.7	59.51	593	593;570;450;459;464;486;420;437;458;468;525	0	124.96	92112000	96			+	4	3;4;19;42;63;85;113;126;135;175;177;187;188;199;207;211;212;242;254;266	True;True;True;True;True;True;True;True;True;True;True;True;True;True;True;True;True;True;True;True	3;4;5;20;44;68;90;123;136;145;188;190;200;201;213;221;226;227;257;270;282	8;9;10;11;12;13;38;39;83;84;125;126;160;161;244;245;275;276;304;378;379;380;383;401;402;403;424;425;439;440;471;472;473;474;554;555;579;580;612;613	45;46;47;48;49;50;51;52;53;54;55;56;57;139;140;141;142;143;144;145;146;147;148;245;246;247;248;328;329;401;402;403;404;699;700;701;786;787;788;789;790;791;792;793;794;795;929;1163;1164;1165;1166;1167;1171;1172;1173;1208;1209;1210;1211;1212;1255;1256;1257;1285;1286;1287;1365;1366;1367;1368;1369;1370;1371;1372;1373;1601;1602;1603;1604;1605;1606;1607;1608;1609;1610;1611;1708;1709;1710;1711;1712;1713…	51;57;139;248;328;401;699;787;929;1163;1172;1209;1212;1255;1285;1369;1371;1607;1708;1801	4	271
CON__P13647	CON__P13647	5	1	1	>P13647 SWISS-PROT:P13647 Tax_Id=9606 Gene_Symbol=KRT5 Keratin, type II cytoskeletal 5	1	5	1	1	8.8	1.5	1.5	62.378	590	590	0	1.7292	254270	2			+	5	29;169;170;231;264	True;False;False;False;False	31;181;182;246;280	63;367;368;369;518;608;609	219;220;1147;1148;1149;1150;1521;1796;1797	220;1149;1150;1521;1796
CON__P35527	CON__P35527	8	8	8	>P35527 SWISS-PROT:P35527 Tax_Id=9606 Gene_Symbol=KRT9 Keratin, type I cytoskeletal 9	1	8	8	8	14.1	14.1	14.1	62.129	623	623	0	24.837	20513000	22			+	6	72;111;158;183;184;190;202;248	True;True;True;True;True;True;True;True	77;121;169;170;196;197;203;216;263	140;242;342;343;344;394;395;396;397;406;429;430;565;566	363;697;1035;1036;1037;1038;1039;1195;1196;1197;1198;1199;1200;1215;1264;1265;1266;1654;1655;1656;1657;1658;1659	363;697;1037;1197;1198;1215;1266;1657
CON__P35908;CON__Q5XKE5;CON__P12035;CON__Q01546	CON__P35908	13;2;1;1	11;2;1;1	8;1;1;1	>P35908 SWISS-PROT:P35908 Tax_Id=9606 Gene_Symbol=KRT2 Keratin, type II cytoskeletal 2 epidermal	4	13	11	8	21.1	18	12.6	65.865	645	645;535;629;638	0	48.568	21587000	23			+	7	30;53;56;68;77;100;146;170;203;218;235;265;268	True;True;True;False;True;False;True;True;True;True;True;True;True	32;56;60;61;73;82;108;156;182;217;233;250;281;284	64;65;107;113;114;134;145;146;209;321;369;431;494;545;610;611;618	221;222;223;224;225;290;302;303;342;343;344;345;346;347;348;369;370;371;372;373;548;549;963;1150;1267;1268;1425;1590;1798;1799;1800;1816;1817	222;290;302;343;372;549;963;1150;1267;1425;1590;1799;1816	5;6	300;473
CON__Q922U2;CON__Q5XQN5	CON__Q922U2;CON__Q5XQN5	5;5	2;2	0;0	>Q922U2 SWISS-PROT:Q922U2 Tax_Id=10090 Gene_Symbol=Krt5 Keratin, type II cytoskeletal 5;>Q5XQN5 SWISS-PROT:Q5XQN5 (Bos taurus) Keratin, type II cytoskeletal 5	2	5	2	0	9	3.6	0	61.766	580	580;601	0	1.7249	665700	2			+	8	148;169;204;231;264	False;False;False;True;True	158;181;218;246;280	323;367;368;432;433;518;608;609	965;1147;1148;1149;1269;1270;1271;1272;1273;1274;1275;1276;1277;1521;1796;1797	965;1149;1270;1521;1796
CON__Streptavidin	CON__Streptavidin	4	4	4	>Streptavidin (S.avidinii)	1	4	4	4	43.1	43.1	43.1	16.622	160	160	0	279.5	865700000	238			+	9	110;163;213;261	True;True;True;True	120;175;228;277	233;234;235;236;237;238;239;240;241;353;354;355;356;357;358;359;475;476;477;478;479;480;481;482;483;484;485;486;593;594;595;596;597;598;599;600;601;602	631;632;633;634;635;636;637;638;639;640;641;642;643;644;645;646;647;648;649;650;651;652;653;654;655;656;657;658;659;660;661;662;663;664;665;666;667;668;669;670;671;672;673;674;675;676;677;678;679;680;681;682;683;684;685;686;687;688;689;690;691;692;693;694;695;696;1054;1055;1056;1057;1058;1059;1060;1061;1062;1063;1064;1065;1066;1067;1068;1069;1070;1071;1072;1073;1074;1075;1076;1077;1078;1079;1080;…	667;1055;1402;1758
sp|O52759|RS4_PSEAE	sp|O52759|RS4_PSEAE	2	2	2	>sp|O52759|RS4_PSEAE 30S ribosomal protein S4 OS=Pseudomonas aeruginosa (strain ATCC 15692 / PAO1 / 1C / PRS 101 / LMG 12228) GN=rpsD PE=3 SV=2	1	2	2	2	7.8	7.8	7.8	23.277	206	206	0	4.398	924200	2				10	125;149	True;True	135;159	274;324	785;966	785;966
sp|O54439|ACP1_PSEAE	sp|O54439|ACP1_PSEAE	1	1	1	>sp|O54439|ACP1_PSEAE Acyl carrier protein 1 OS=Pseudomonas aeruginosa (strain ATCC 15692 / PAO1 / 1C / PRS 101 / LMG 12228) GN=acpP1 PE=3 SV=4	1	1	1	1	20.5	20.5	20.5	8.7406	78	78	0	11.668	7242800	4				11	116	TRUE	126	248;249;250	704;705;706;707	704
sp|P05384|DBHB_PSEAE	sp|P05384|DBHB_PSEAE	2	2	2	>sp|P05384|DBHB_PSEAE DNA-binding protein HU-beta OS=Pseudomonas aeruginosa (strain ATCC 15692 / PAO1 / 1C / PRS 101 / LMG 12228) GN=hupB PE=1 SV=3	1	2	2	2	32.2	32.2	32.2	9.0865	90	90	0	15.901	19051000	9				12	18;200	True;True	19;214	35;36;37;426;427	134;135;136;137;138;1258;1259;1260;1261;1262	135;1260
sp|P08308|OTCC_PSEAE	sp|P08308|OTCC_PSEAE	6	6	6	>sp|P08308|OTCC_PSEAE Ornithine carbamoyltransferase, catabolic OS=Pseudomonas aeruginosa (strain ATCC 15692 / PAO1 / 1C / PRS 101 / LMG 12228) GN=arcB PE=1 SV=3	1	6	6	6	17	17	17	38.108	336	336	0	12.432	16289000	15				13	62;152;162;167;174;269	True;True;True;True;True;True	67;162;174;179;187;285	124;330;331;351;352;365;377;619;620	327;998;999;1000;1001;1002;1050;1051;1052;1053;1145;1162;1818;1819;1820	327;999;1050;1145;1162;1820
sp|P09591|EFTU_PSEAE	sp|P09591|EFTU_PSEAE	12	12	12	>sp|P09591|EFTU_PSEAE Elongation factor Tu OS=Pseudomonas aeruginosa (strain ATCC 15692 / PAO1 / 1C / PRS 101 / LMG 12228) GN=tufA PE=1 SV=2	1	12	12	12	45.3	45.3	45.3	43.369	397	397	0	74.483	86456000	58				14	6;15;17;44;47;61;81;153;160;168;189;249	True;True;True;True;True;True;True;True;True;True;True;True	7;16;18;46;49;66;86;163;172;180;202;264	18;29;30;32;33;34;91;92;95;96;123;152;153;154;155;332;333;346;347;348;366;404;405;567	91;92;109;110;111;112;113;114;116;117;118;119;120;121;122;123;124;125;126;127;128;129;130;131;132;133;255;256;259;260;261;262;326;380;381;382;383;384;385;386;387;1003;1004;1041;1042;1043;1044;1045;1046;1047;1146;1213;1214;1660;1661;1662;1663;1664	91;112;118;255;259;326;383;1004;1042;1146;1214;1661
sp|P11221|OPRI_PSEAE	sp|P11221|OPRI_PSEAE	1	1	1	>sp|P11221|OPRI_PSEAE Major outer membrane lipoprotein OS=Pseudomonas aeruginosa (strain ATCC 15692 / PAO1 / 1C / PRS 101 / LMG 12228) GN=oprI PE=3 SV=1	1	1	1	1	12	12	12	8.8348	83	83	0	2.5347	1319000	2				15	151	TRUE	161	328;329	996;997	996
sp|P13794|PORF_PSEAE	sp|P13794|PORF_PSEAE	4	4	4	>sp|P13794|PORF_PSEAE Outer membrane porin F OS=Pseudomonas aeruginosa (strain ATCC 15692 / PAO1 / 1C / PRS 101 / LMG 12228) GN=oprF PE=1 SV=1	1	4	4	4	19.7	19.7	19.7	37.639	350	350	0	8.6315	7942700	11				16	54;191;194;245	True;True;True;True	57;204;207;260	108;109;407;408;412;559;560	291;292;293;294;1216;1217;1218;1222;1615;1616;1617	291;1217;1222;1615
sp|P13981|ARCA_PSEAE	sp|P13981|ARCA_PSEAE	14	14	14	>sp|P13981|ARCA_PSEAE Arginine deiminase OS=Pseudomonas aeruginosa (strain ATCC 15692 / PAO1 / 1C / PRS 101 / LMG 12228) GN=arcA PE=1 SV=2	1	14	14	14	41.1	41.1	41.1	46.435	418	418	0	78.891	41850000	44				17	16;45;48;79;114;121;176;179;182;193;217;221;240;257	True;True;True;True;True;True;True;True;True;True;True;True;True;True	17;47;50;84;124;131;189;192;195;206;232;236;255;273	31;93;97;98;149;150;246;268;381;382;385;393;410;411;492;493;501;502;503;552;585;586	115;257;263;264;376;377;378;702;777;1168;1169;1170;1175;1194;1220;1221;1423;1424;1463;1464;1465;1466;1467;1468;1469;1470;1471;1472;1473;1474;1475;1476;1477;1597;1598;1599;1724;1725;1726;1727;1728;1729;1730;1731	115;257;263;378;702;777;1169;1175;1194;1221;1424;1464;1598;1728
sp|P30718|CH60_PSEAE	sp|P30718|CH60_PSEAE	11	11	11	>sp|P30718|CH60_PSEAE 60 kDa chaperonin OS=Pseudomonas aeruginosa (strain ATCC 15692 / PAO1 / 1C / PRS 101 / LMG 12228) GN=groL PE=1 SV=3	1	11	11	11	25.4	25.4	25.4	57.085	547	547	0	27.582	26420000	21				18	1;22;26;37;38;46;64;157;185;201;237	True;True;True;True;True;True;True;True;True;True;True	1;23;28;39;40;48;69;168;198;215;252	4;5;44;54;55;56;57;77;78;94;127;341;398;428;547;548	33;34;35;36;37;154;187;188;189;190;191;192;239;240;258;330;1034;1201;1263;1592;1593	34;154;187;239;240;258;330;1034;1201;1263;1592
sp|P37799|BCCP_PSEAE	sp|P37799|BCCP_PSEAE	6	6	6	>sp|P37799|BCCP_PSEAE Biotin carboxyl carrier protein of acetyl-CoA carboxylase OS=Pseudomonas aeruginosa (strain ATCC 15692 / PAO1 / 1C / PRS 101 / LMG 12228) GN=accB PE=3 SV=1	1	6	6	6	57.7	57.7	57.7	16.455	156	156	0	199.78	1281600000	250				19	0;118;133;141;209;219	True;True;True;True;True;True	0;128;143;151;223;224;234	0;1;2;3;253;254;255;256;257;258;259;260;261;262;263;293;294;295;296;297;298;299;300;301;314;443;444;445;446;447;448;449;450;451;452;453;454;455;456;457;458;459;460;461;462;463;464;465;466;467;468;495;496;497;498;499	0;1;2;3;4;5;6;7;8;9;10;11;12;13;14;15;16;17;18;19;20;21;22;23;24;25;26;27;28;29;30;31;32;710;711;712;713;714;715;716;717;718;719;720;721;722;723;724;725;726;727;728;729;730;731;732;733;734;735;736;737;738;739;740;741;742;743;744;745;746;747;748;749;750;751;752;753;754;755;756;757;758;759;760;761;762;763;869;870;871;872;873;874;875;876;877;878;879;880;881;882;883;884;885;886;887;888;889;890;891;89…	4;753;919;948;1294;1430	7	87
sp|P53593|SUCC_PSEAE	sp|P53593|SUCC_PSEAE	4	4	4	>sp|P53593|SUCC_PSEAE Succinyl-CoA ligase [ADP-forming] subunit beta OS=Pseudomonas aeruginosa (strain ATCC 15692 / PAO1 / 1C / PRS 101 / LMG 12228) GN=sucC PE=3 SV=2	1	4	4	4	13.4	13.4	13.4	41.542	388	388	0	26.8	6511800	9				20	11;35;39;171	True;True;True;True	12;37;41;183	24;71;72;79;370;371	104;231;232;233;234;241;1151;1152;1153	104;231;241;1151
sp|P53641|SODF_PSEAE	sp|P53641|SODF_PSEAE	5	5	5	>sp|P53641|SODF_PSEAE Superoxide dismutase [Fe] OS=Pseudomonas aeruginosa (strain ATCC 15692 / PAO1 / 1C / PRS 101 / LMG 12228) GN=sodB PE=3 SV=3	1	5	5	5	34.7	34.7	34.7	21.351	193	193	0	12.299	13974000	11				21	12;164;205;230;270	True;True;True;True;True	13;176;219;245;286	25;26;360;434;435;436;516;517;621	105;106;1138;1278;1279;1280;1281;1518;1519;1520;1821	105;1138;1280;1519;1821
sp|Q51567|SUCD_PSEAE	sp|Q51567|SUCD_PSEAE	2	2	2	>sp|Q51567|SUCD_PSEAE Succinyl-CoA ligase [ADP-forming] subunit alpha OS=Pseudomonas aeruginosa (strain ATCC 15692 / PAO1 / 1C / PRS 101 / LMG 12228) GN=sucD PE=3 SV=2	1	2	2	2	7.5	7.5	7.5	30.266	295	295	0	4.6748	2325100	4				22	51;66	True;True	54;71	104;130;131	283;284;334;335	283;334
sp|Q59638|ODP2_PSEAE	sp|Q59638|ODP2_PSEAE	2	2	2	>sp|Q59638|ODP2_PSEAE Dihydrolipoyllysine-residue acetyltransferase component of pyruvate dehydrogenase complex OS=Pseudomonas aeruginosa (strain ATCC 15692 / PAO1 / 1C / PRS 101 / LMG 12228) GN=aceF PE=2 SV=2	1	2	2	2	4.4	4.4	4.4	56.708	547	547	0	1.2183	224270	2				23	7;8	True;True	8;9	19;20	93;94	93;94
sp|Q9HT18|ATPA_PSEAE	sp|Q9HT18|ATPA_PSEAE	8	8	8	>sp|Q9HT18|ATPA_PSEAE ATP synthase subunit alpha OS=Pseudomonas aeruginosa (strain ATCC 15692 / PAO1 / 1C / PRS 101 / LMG 12228) GN=atpA PE=3 SV=1	1	8	8	8	16.1	16.1	16.1	55.393	514	514	0	15.606	9207700	13				24	75;106;119;166;215;220;251;255	True;True;True;True;True;True;True;True	80;116;129;178;230;235;267;271	143;227;264;363;364;489;490;500;575;581;582	366;622;764;1143;1144;1418;1419;1420;1421;1462;1702;1716;1717;1718	366;622;764;1143;1419;1462;1702;1716
sp|Q9HTN8|RL28_PSEAE	sp|Q9HTN8|RL28_PSEAE	1	1	1	>sp|Q9HTN8|RL28_PSEAE 50S ribosomal protein L28 OS=Pseudomonas aeruginosa (strain ATCC 15692 / PAO1 / 1C / PRS 101 / LMG 12228) GN=rpmB PE=3 SV=1	1	1	1	1	12.8	12.8	12.8	9.0655	78	78	0	1.5499	576810	1				25	80	TRUE	85	151	379	379
sp|Q9HV43|DNAK_PSEAE	sp|Q9HV43|DNAK_PSEAE	2	2	2	>sp|Q9HV43|DNAK_PSEAE Chaperone protein DnaK OS=Pseudomonas aeruginosa (strain ATCC 15692 / PAO1 / 1C / PRS 101 / LMG 12228) GN=dnaK PE=3 SV=1	1	2	2	2	5.3	5.3	5.3	68.402	637	637	0	1.7696	828950	3				26	34;161	True;True	36;173	70;349;350	230;1048;1049	230;1048
sp|Q9HWC9|RPOC_PSEAE	sp|Q9HWC9|RPOC_PSEAE	1	1	1	>sp|Q9HWC9|RPOC_PSEAE DNA-directed RNA polymerase subunit beta OS=Pseudomonas aeruginosa (strain ATCC 15692 / PAO1 / 1C / PRS 101 / LMG 12228) GN=rpoC PE=3 SV=1	1	1	1	1	0.7	0.7	0.7	154.38	1399	1399	0	1.1647	193410	1				27	243	TRUE	258	556	1612	1612
sp|Q9HWD2|EFG1_PSEAE;sp|Q9I244|EFG2_PSEAE	sp|Q9HWD2|EFG1_PSEAE	7;3	7;3	7;3	>sp|Q9HWD2|EFG1_PSEAE Elongation factor G 1 OS=Pseudomonas aeruginosa (strain ATCC 15692 / PAO1 / 1C / PRS 101 / LMG 12228) GN=fusA PE=1 SV=1	2	7	7	7	13.2	13.2	13.2	77.784	706	706;702	0	10.568	6213400	9				28	14;71;89;90;97;123;260	True;True;True;True;True;True;True	15;76;94;95;103;133;276	28;139;180;181;182;197;270;271;592	108;362;476;477;478;511;780;781;1737	108;362;476;478;511;780;1737
sp|Q9HWD8|RL2_PSEAE	sp|Q9HWD8|RL2_PSEAE	2	2	2	>sp|Q9HWD8|RL2_PSEAE 50S ribosomal protein L2 OS=Pseudomonas aeruginosa (strain ATCC 15692 / PAO1 / 1C / PRS 101 / LMG 12228) GN=rplB PE=3 SV=1	1	2	2	2	9.2	9.2	9.2	29.579	273	273	0	2.724	4559400	5				29	36;195	True;True	38;208	73;74;75;76;413;414	235;236;237;238;1223;1224	236;1223
sp|Q9HWE2|RL16_PSEAE	sp|Q9HWE2|RL16_PSEAE	3	3	3	>sp|Q9HWE2|RL16_PSEAE 50S ribosomal protein L16 OS=Pseudomonas aeruginosa (strain ATCC 15692 / PAO1 / 1C / PRS 101 / LMG 12228) GN=rplP PE=3 SV=1	1	3	3	3	23.4	23.4	23.4	15.401	137	137	0	14.555	20156000	10				30	145;244;252	True;True;True	155;259;268	319;320;557;558;576;577	959;960;961;962;1613;1614;1703;1704;1705;1706	961;1614;1703
sp|Q9HZ71|RS1_PSEAE	sp|Q9HZ71|RS1_PSEAE	3	3	3	>sp|Q9HZ71|RS1_PSEAE 30S ribosomal protein S1 OS=Pseudomonas aeruginosa (strain ATCC 15692 / PAO1 / 1C / PRS 101 / LMG 12228) GN=rpsA PE=3 SV=1	1	3	3	3	7.2	7.2	7.2	61.869	559	559	0	8.8247	1470100	3				31	59;74;216	True;True;True	64;79;231	120;142;491	323;365;1422	323;365;1422
sp|Q9I2V5|ACNB_PSEAE	sp|Q9I2V5|ACNB_PSEAE	5	5	5	>sp|Q9I2V5|ACNB_PSEAE Aconitate hydratase B OS=Pseudomonas aeruginosa (strain ATCC 15692 / PAO1 / 1C / PRS 101 / LMG 12228) GN=acnB PE=3 SV=1	1	5	5	5	8.5	8.5	8.5	93.627	869	869	0	6.5487	2051500	5				32	128;144;156;159;229	True;True;True;True;True	138;154;167;171;244	278;318;340;345;515	797;958;1033;1040;1517	797;958;1033;1040;1517
sp|Q9I3D1|DLDH2_PSEAE	sp|Q9I3D1|DLDH2_PSEAE	3	3	3	>sp|Q9I3D1|DLDH2_PSEAE Dihydrolipoyl dehydrogenase OS=Pseudomonas aeruginosa (strain ATCC 15692 / PAO1 / 1C / PRS 101 / LMG 12228) GN=lpdG PE=3 SV=1	1	3	3	3	7.5	7.5	7.5	50.164	478	478	0	6.4196	3126300	5				33	24;32;127	True;True;True	25;34;137	46;47;67;68;277	156;157;158;227;228;796	156;227;796
sp|Q9I3F5|ACNA_PSEAE	sp|Q9I3F5|ACNA_PSEAE	1	1	1	>sp|Q9I3F5|ACNA_PSEAE Aconitate hydratase A OS=Pseudomonas aeruginosa (strain ATCC 15692 / PAO1 / 1C / PRS 101 / LMG 12228) GN=acnA PE=3 SV=1	1	1	1	1	1.3	1.3	1.3	99.147	910	910	0	1.6366	413520	1				34	109	TRUE	119	232	630	630
sp|Q9I576|HPPD_PSEAE	sp|Q9I576|HPPD_PSEAE	1	1	1	>sp|Q9I576|HPPD_PSEAE 4-hydroxyphenylpyruvate dioxygenase OS=Pseudomonas aeruginosa (strain ATCC 15692 / PAO1 / 1C / PRS 101 / LMG 12228) GN=hpd PE=3 SV=1	1	1	1	1	4.2	4.2	4.2	39.912	357	357	0	2.9921	562120	4				35	165	TRUE	177	361;362	1139;1140;1141;1142	1139
sp|Q9I617|BIOF_PSEAE	sp|Q9I617|BIOF_PSEAE	1	1	1	>sp|Q9I617|BIOF_PSEAE 8-amino-7-oxononanoate synthase OS=Pseudomonas aeruginosa (strain ATCC 15692 / PAO1 / 1C / PRS 101 / LMG 12228) GN=bioF PE=3 SV=1	1	1	1	1	5	5	5	42.237	401	401	0	1.6077	981710	0				36	31	TRUE	33	66	226	226
sp|Q9I685|SAHH_PSEAE	sp|Q9I685|SAHH_PSEAE	3	3	3	>sp|Q9I685|SAHH_PSEAE Adenosylhomocysteinase OS=Pseudomonas aeruginosa (strain ATCC 15692 / PAO1 / 1C / PRS 101 / LMG 12228) GN=ahcY PE=3 SV=1	1	3	3	3	7.5	7.5	7.5	51.399	469	469	0	3.5826	2868500	7				37	103;247;259	True;True;True	112;262;275	216;217;563;564;590;591	578;579;1651;1652;1653;1735;1736	579;1652;1735
sp|Q9I6M4|DAVT_PSEAE	sp|Q9I6M4|DAVT_PSEAE	1	1	1	>sp|Q9I6M4|DAVT_PSEAE 5-aminovalerate aminotransferase DavT OS=Pseudomonas aeruginosa (strain ATCC 15692 / PAO1 / 1C / PRS 101 / LMG 12228) GN=davT PE=1 SV=1	1	1	1	1	3.8	3.8	3.8	45.22	426	426	0	2.4624	487660	1				38	225	TRUE	240	508	1500	1500
sp|Q9X2T1|THIO_PSEAE	sp|Q9X2T1|THIO_PSEAE	1	1	1	>sp|Q9X2T1|THIO_PSEAE Thioredoxin OS=Pseudomonas aeruginosa (strain ATCC 15692 / PAO1 / 1C / PRS 101 / LMG 12228) GN=trxA PE=3 SV=1	1	1	1	1	11.1	11.1	11.1	11.87	108	108	0	1.5701	1813000	6				39	142	TRUE	152	315;316	950;951;952;953;954;955	951
tr|Q9HTD0|Q9HTD0_PSEAE	tr|Q9HTD0|Q9HTD0_PSEAE	1	1	1	>tr|Q9HTD0|Q9HTD0_PSEAE Probable biotin carboxylase subunit of a transcarboxylase OS=Pseudomonas aeruginosa (strain ATCC 15692 / PAO1 / 1C / PRS 101 / LMG 12228) GN=PA5436 PE=4 SV=1	1	1	1	1	2.1	2.1	2.1	51.848	471	471	0	1.4489	380010	3				40	214	TRUE	229	487;488	1415;1416;1417	1416
tr|Q9HTD1|Q9HTD1_PSEAE	tr|Q9HTD1|Q9HTD1_PSEAE	32	32	32	>tr|Q9HTD1|Q9HTD1_PSEAE Probable transcarboxylase subunit OS=Pseudomonas aeruginosa (strain ATCC 15692 / PAO1 / 1C / PRS 101 / LMG 12228) GN=PA5435 PE=4 SV=1	1	32	32	32	66.1	66.1	66.1	66.095	607	607	0	323.31	1287800000	521				41	2;5;25;27;28;43;49;58;69;84;87;88;91;92;95;98;101;117;120;155;180;181;196;197;198;222;224;234;246;250;253;267	True;True;True;True;True;True;True;True;True;True;True;True;True;True;True;True;True;True;True;True;True;True;True;True;True;True;True;True;True;True;True;True	2;6;26;27;29;30;45;51;52;63;74;89;92;93;96;97;98;101;104;105;106;109;110;127;130;165;166;193;194;209;210;211;212;237;239;249;261;265;266;269;283	6;7;14;15;16;17;48;49;50;51;52;53;58;59;60;61;62;85;86;87;88;89;90;99;100;101;102;117;118;119;135;136;137;159;163;164;165;166;167;168;169;170;171;172;173;174;175;176;177;178;179;183;184;185;186;187;188;189;190;191;194;198;199;200;201;202;203;204;205;206;210;211;212;213;214;251;252;265;266;267;336;337;338;339;386;387;388;389;390;391;392;415;416;417;418;419;420;421;422;423;504;505;507;524;525;526;5…	38;39;40;41;42;43;44;58;59;60;61;62;63;64;65;66;67;68;69;70;71;72;73;74;75;76;77;78;79;80;81;82;83;84;85;86;87;88;89;90;159;160;161;162;163;164;165;166;167;168;169;170;171;172;173;174;175;176;177;178;179;180;181;182;183;184;185;186;193;194;195;196;197;198;199;200;201;202;203;204;205;206;207;208;209;210;211;212;213;214;215;216;217;218;249;250;251;252;253;254;265;266;267;268;269;270;271;272;273;274…	38;63;182;195;216;251;272;317;352;393;407;419;480;497;507;521;570;709;766;1015;1178;1186;1233;1247;1250;1479;1499;1581;1619;1687;1707;1811	8;9;10;11;12;13;14;15;16;17	125;169;172;182;239;251;306;323;435;544
tr|Q9HTP2|Q9HTP2_PSEAE	tr|Q9HTP2|Q9HTP2_PSEAE	3	3	3	>tr|Q9HTP2|Q9HTP2_PSEAE Probable aldehyde dehydrogenase OS=Pseudomonas aeruginosa (strain ATCC 15692 / PAO1 / 1C / PRS 101 / LMG 12228) GN=PA5312 PE=3 SV=1	1	3	3	3	8	8	8	53.143	497	497	0	2.6059	5083500	4				42	70;96;131	True;True;True	75;102;141	138;195;196;289;290	361;509;510;863;864	361;510;864
tr|Q9HW49|Q9HW49_PSEAE	tr|Q9HW49|Q9HW49_PSEAE	2	2	2	>tr|Q9HW49|Q9HW49_PSEAE Uncharacterized protein OS=Pseudomonas aeruginosa (strain ATCC 15692 / PAO1 / 1C / PRS 101 / LMG 12228) GN=PA4352 PE=3 SV=1	1	2	2	2	12.9	12.9	12.9	30.972	286	286	0	1.2589	622300	2				43	236;238	True;True	251;253	546;549	1591;1594	1591;1594
tr|Q9HXA5|Q9HXA5_PSEAE	tr|Q9HXA5|Q9HXA5_PSEAE	1	1	1	>tr|Q9HXA5|Q9HXA5_PSEAE Uncharacterized protein OS=Pseudomonas aeruginosa (strain ATCC 15692 / PAO1 / 1C / PRS 101 / LMG 12228) GN=PA3908 PE=4 SV=1	1	1	1	1	6.3	6.3	6.3	27.294	239	239	0	1.1845	9890000	7				44	137	TRUE	147	307;308	933;934;935;936;937;938;939	937
tr|Q9HY81|Q9HY81_PSEAE	tr|Q9HY81|Q9HY81_PSEAE	3	3	3	>tr|Q9HY81|Q9HY81_PSEAE Probable peroxidase OS=Pseudomonas aeruginosa (strain ATCC 15692 / PAO1 / 1C / PRS 101 / LMG 12228) GN=PA3529 PE=1 SV=1	1	3	3	3	17.5	17.5	17.5	21.822	200	200	0	8.9875	5557600	7				45	41;82;210	True;True;True	43;87;225	81;82;156;469;470	243;244;388;1361;1362;1363;1364	243;388;1361
tr|Q9HYT5|Q9HYT5_PSEAE	tr|Q9HYT5|Q9HYT5_PSEAE	3	3	3	>tr|Q9HYT5|Q9HYT5_PSEAE Uncharacterized protein OS=Pseudomonas aeruginosa (strain ATCC 15692 / PAO1 / 1C / PRS 101 / LMG 12228) GN=PA3309 PE=3 SV=1	1	3	3	3	23.2	23.2	23.2	16.496	151	151	0	13.536	12803000	8				46	108;138;239	True;True;True	118;148;254	230;231;309;310;550;551	626;627;628;629;940;941;1595;1596	626;941;1595
tr|Q9I0L5|Q9I0L5_PSEAE	tr|Q9I0L5|Q9I0L5_PSEAE	3	3	3	>tr|Q9I0L5|Q9I0L5_PSEAE Isocitrate dehydrogenase [NADP] OS=Pseudomonas aeruginosa (strain ATCC 15692 / PAO1 / 1C / PRS 101 / LMG 12228) GN=icd PE=3 SV=1	1	3	3	3	7.4	7.4	7.4	45.577	418	418	0	3.7535	2956500	4				47	23;83;112	True;True;True	24;88;122	45;157;158;243	155;389;390;698	155;389;698
tr|Q9I246|Q9I246_PSEAE	tr|Q9I246|Q9I246_PSEAE	2	2	2	>tr|Q9I246|Q9I246_PSEAE Probable carbamoyl transferase OS=Pseudomonas aeruginosa (strain ATCC 15692 / PAO1 / 1C / PRS 101 / LMG 12228) GN=PA2069 PE=4 SV=1	1	2	2	2	4.4	4.4	4.4	63.382	574	574	0	4.5311	683740	2				48	115;178	True;True	125;191	247;384	703;1174	703;1174
tr|Q9I299|Q9I299_PSEAE	tr|Q9I299|Q9I299_PSEAE	18	18	18	>tr|Q9I299|Q9I299_PSEAE Methylcrotonyl-CoA carboxylase, alpha-subunit (Biotin-containing) OS=Pseudomonas aeruginosa (strain ATCC 15692 / PAO1 / 1C / PRS 101 / LMG 12228) GN=liuD PE=1 SV=1	1	18	18	18	42.4	42.4	42.4	71.282	655	655	0	70.313	78280000	46				49	20;21;57;60;76;93;94;102;104;107;124;132;136;147;154;192;228;256	True;True;True;True;True;True;True;True;True;True;True;True;True;True;True;True;True;True	21;22;62;65;81;99;100;111;113;117;134;142;146;157;164;205;243;272	40;41;42;43;115;116;121;122;144;192;193;215;218;219;228;229;272;273;291;292;305;306;322;334;335;409;513;514;583;584	149;150;151;152;153;304;305;306;307;324;325;367;368;504;505;506;577;580;581;582;623;624;625;782;783;784;865;866;867;868;930;931;932;964;1005;1006;1219;1513;1514;1515;1516;1719;1720;1721;1722;1723	152;153;304;325;367;505;506;577;582;623;784;865;930;964;1005;1219;1514;1720
tr|Q9I2J2|Q9I2J2_PSEAE	tr|Q9I2J2|Q9I2J2_PSEAE	1	1	1	>tr|Q9I2J2|Q9I2J2_PSEAE ECF sigma factor, FemI OS=Pseudomonas aeruginosa (strain ATCC 15692 / PAO1 / 1C / PRS 101 / LMG 12228) GN=femI PE=3 SV=1	1	1	1	1	9.5	9.5	9.5	19.09	168	168	0	1.8085	2020100	0				50	262	TRUE	278	603;604	1785;1786	1785
tr|Q9I2R5|Q9I2R5_PSEAE	tr|Q9I2R5|Q9I2R5_PSEAE	2	2	2	>tr|Q9I2R5|Q9I2R5_PSEAE Uncharacterized protein OS=Pseudomonas aeruginosa (strain ATCC 15692 / PAO1 / 1C / PRS 101 / LMG 12228) GN=PA1830 PE=4 SV=1	1	2	2	2	20.2	20.2	20.2	11.11	104	104	0	2.771	2237200	3				51	10;232	True;True	11;247	23;519	102;103;1522	102;1522
tr|Q9I3D3|Q9I3D3_PSEAE	tr|Q9I3D3|Q9I3D3_PSEAE	1	1	1	>tr|Q9I3D3|Q9I3D3_PSEAE 2-oxoglutarate dehydrogenase (E1 subunit) OS=Pseudomonas aeruginosa (strain ATCC 15692 / PAO1 / 1C / PRS 101 / LMG 12228) GN=sucA PE=4 SV=1	1	1	1	1	1.8	1.8	1.8	105.88	943	943	0	3.1962	718500	2				52	143	TRUE	153	317	956;957	956
tr|Q9I3D5|Q9I3D5_PSEAE	tr|Q9I3D5|Q9I3D5_PSEAE	3	3	3	>tr|Q9I3D5|Q9I3D5_PSEAE Succinate dehydrogenase flavoprotein subunit OS=Pseudomonas aeruginosa (strain ATCC 15692 / PAO1 / 1C / PRS 101 / LMG 12228) GN=sdhA PE=3 SV=1	1	3	3	3	7.8	7.8	7.8	63.531	590	590	0	4.4635	3167500	8				53	40;73;99	True;True;True	42;78;107	80;141;207;208	242;364;542;543;544;545;546;547	242;364;545
tr|Q9I5U9|Q9I5U9_PSEAE	tr|Q9I5U9|Q9I5U9_PSEAE	4	4	4	>tr|Q9I5U9|Q9I5U9_PSEAE Uncharacterized protein OS=Pseudomonas aeruginosa (strain ATCC 15692 / PAO1 / 1C / PRS 101 / LMG 12228) GN=PA0588 PE=4 SV=1	1	4	4	4	7.3	7.3	7.3	73.722	640	640	0	6.2448	2131700	5				54	50;134;140;173	True;True;True;True	53;144;150;186	103;302;303;313;376	282;927;928;947;1161	282;927;947;1161
tr|Q9I657|Q9I657_PSEAE	tr|Q9I657|Q9I657_PSEAE	1	1	1	>tr|Q9I657|Q9I657_PSEAE Uncharacterized protein OS=Pseudomonas aeruginosa (strain ATCC 15692 / PAO1 / 1C / PRS 101 / LMG 12228) GN=PA0461 PE=4 SV=1	1	1	1	1	3.4	3.4	3.4	34.31	295	295	0	1.1784	1322500	1				55	13	TRUE	14	27	107	107
tr|Q9I6Z3|Q9I6Z3_PSEAE	tr|Q9I6Z3|Q9I6Z3_PSEAE	4	4	4	>tr|Q9I6Z3|Q9I6Z3_PSEAE Alkyl hydroperoxide reductase subunit C OS=Pseudomonas aeruginosa (strain ATCC 15692 / PAO1 / 1C / PRS 101 / LMG 12228) GN=ahpC PE=4 SV=1	1	4	4	4	23.5	23.5	23.5	20.541	187	187	0	13.591	9653400	13				56	67;86;206;258	True;True;True;True	72;91;220;274	132;133;162;437;438;587;588;589	336;337;338;339;340;341;405;1282;1283;1284;1732;1733;1734	340;405;1282;1733

## Sheet: 2-1 proteinGroups Probe 12
Protein IDs	Majority protein IDs	Peptide counts (all)	Peptide counts (razor+unique)	Peptide counts (unique)	Fasta headers	Number of proteins	Peptides	Razor + unique peptides	Unique peptides	Sequence coverage [%]	Unique + razor sequencecoverage [%]	Unique sequencecoverage [%]	Mol. weight [kDa]	Sequence length	Sequence lengths	Q-value	Score	Intensity	MS/MS Count	Only identified by site	Reverse	Potential contaminant	id	Peptide IDs	Peptide is razor	Mod. peptide IDs	Evidence IDs	MS/MS IDs	Best MS/MS	Oxidation (M) site IDs	Oxidation (M) site positions
CON__A2I7N1;CON__REFSEQ:XP_001252647;CON__A2I7N3	CON__A2I7N1;CON__REFSEQ:XP_001252647;CON__A2I7N3	1;1;1	1;1;1	1;1;1	>A2I7N1 TREMBL:A2I7N1 (Bos taurus) SERPINA3-5;>REFSEQ:XP_001252647 (Bos taurus) similar to endopin 2B;>A2I7N3 TREMBL:A2I7N3;Q27984 (Bos taurus) SERPINA3-7	3	1	1	1	4.1	4.1	4.1	46.397	411	411;417;417	0.0099502	5.8171	1759000	1			+	0	612	TRUE	645	1094	2037	2037	0	277
CON__P00761	CON__P00761	4	4	4	>P00761 SWISS-PROT:P00761|TRYP_PIG Trypsin - Sus scrofa (Pig).	1	4	4	4	25.1	25.1	25.1	24.409	231	231	0	100.97	1517900000	125			+	1	417;510;576;842	True;True;True;True	445;446;540;607;885	734;735;736;737;738;739;740;903;904;905;906;1032;1033;1514;1515;1516	1357;1358;1359;1360;1361;1362;1363;1364;1365;1366;1367;1368;1369;1370;1371;1372;1373;1374;1375;1376;1377;1378;1379;1380;1381;1382;1383;1384;1385;1386;1387;1388;1389;1390;1391;1392;1676;1677;1678;1679;1680;1681;1682;1683;1684;1685;1686;1687;1688;1689;1690;1691;1692;1693;1694;1695;1696;1697;1698;1699;1700;1701;1702;1703;1704;1705;1706;1707;1708;1709;1710;1711;1712;1713;1903;1904;1905;1906;1907;1908…	1376;1685;1913;2850	1	94
CON__P02533;CON__Q6IFX2;CON__P19012;CON__A2A4G1;CON__Q61782;CON__ENSEMBL:ENSP00000377550;CON__P13646-1;CON__P08727;CON__P19001;CON__P35900;CON__Q9D312;CON__P08730-1;CON__Q8N1A0;CON__Q7Z3Y9	CON__P02533	12;5;4;4;3;3;3;2;2;2;2;2;1;1	5;1;0;0;1;0;0;0;0;0;0;0;0;0	3;1;0;0;1;0;0;0;0;0;0;0;0;0	>P02533 SWISS-PROT:P02533 Tax_Id=9606 Gene_Symbol=KRT14 Keratin, type I cytoskeletal 14	14	12	5	3	26.7	14.2	9.7	51.621	472	472;452;456;456;93;420;458;400;403;424;431;437;295;468	0	49.181	33182000	17			+	2	76;109;129;154;261;441;501;540;723;826;884;921	False;True;False;True;True;False;False;True;True;False;False;False	84;121;142;169;282;471;531;570;765;869;927;965;966	142;143;209;210;242;286;462;463;775;776;777;778;779;885;886;979;980;1301;1302;1489;1490;1598;1599;1661;1662	317;318;319;320;321;322;323;324;325;326;327;328;455;456;457;458;459;504;505;506;507;588;883;884;885;886;887;888;1472;1473;1474;1475;1476;1636;1637;1638;1639;1640;1641;1642;1820;1821;1822;2425;2426;2801;2802;2803;2804;2805;2806;3015;3016;3017;3018;3019;3132;3133	325;457;505;588;883;1476;1636;1822;2425;2802;3016;3133	2	119
CON__P02538;CON__O95678;CON__Q8VED5;CON__P05787;CON__Q5XKE5;CON__P12035;CON__H-INV:HIT000292931;CON__P19013	CON__P02538	19;5;3;2;2;2;1;1	18;5;2;1;2;2;1;1	2;0;0;0;0;0;0;0	>P02538 SWISS-PROT:P02538 Tax_Id=9606 Gene_Symbol=KRT6A Keratin, type II cytoskeletal 6A	8	19	18	2	33.2	31.4	3.5	60.044	564	564;551;531;483;535;629;443;594	0	173.08	208690000	72			+	3	22;27;64;120;199;266;331;483;496;572;643;645;646;694;695;731;777;950;960	True;True;True;True;True;True;True;True;True;True;True;False;True;True;True;True;True;True;True	24;29;72;132;217;287;288;354;513;526;603;682;684;685;735;736;773;820;995;1005	41;42;50;51;122;123;227;228;364;472;473;474;475;582;859;876;877;1026;1162;1163;1164;1165;1168;1169;1170;1171;1257;1258;1315;1316;1402;1403;1709;1710;1729;1730	112;113;114;115;116;117;118;119;128;129;130;131;132;285;286;287;288;289;482;483;484;485;486;735;904;905;906;907;908;909;1096;1598;1623;1624;1895;2178;2179;2180;2181;2182;2183;2184;2185;2186;2187;2193;2194;2195;2196;2197;2198;2199;2200;2201;2202;2203;2355;2356;2440;2441;2620;2621;2622;2623;2624;2625;3200;3201;3202;3203;3204;3245;3246;3247;3248;3249;3250;3251;3252;3253	113;131;288;483;735;907;1096;1598;1624;1895;2179;2193;2200;2355;2356;2441;2620;3201;3249	3	452
CON__P04259	CON__P04259	18	1	1	>P04259 SWISS-PROT:P04259 Tax_Id=9606 Gene_Symbol=KRT6B Keratin, type II cytoskeletal 6B	1	18	1	1	31.4	3	3	59.998	564	564	0	7.6737	6426900	2			+	4	22;27;120;131;199;266;483;496;572;643;645;646;694;695;730;777;950;960	False;False;False;True;False;False;False;False;False;False;False;False;False;False;False;False;False;False	24;29;132;144;217;287;288;513;526;603;682;684;685;735;736;772;820;995;1005	41;42;50;51;227;228;245;246;364;472;473;474;475;859;876;877;1026;1162;1163;1164;1165;1168;1169;1170;1171;1257;1258;1313;1314;1402;1403;1709;1710;1729;1730	112;113;114;115;116;117;118;119;128;129;130;131;132;482;483;484;485;486;511;512;735;904;905;906;907;908;909;1598;1623;1624;1895;2178;2179;2180;2181;2182;2183;2184;2185;2186;2187;2193;2194;2195;2196;2197;2198;2199;2200;2201;2202;2203;2355;2356;2438;2439;2620;2621;2622;2623;2624;2625;3200;3201;3202;3203;3204;3245;3246;3247;3248;3249;3250;3251;3252;3253	113;131;483;511;735;907;1598;1624;1895;2179;2193;2200;2355;2356;2439;2620;3201;3249	3	452
CON__P04264;CON__Q6IFZ6;CON__H-INV:HIT000016045;CON__Q9R0H5;CON__Q6NXH9;CON__Q7Z794;CON__Q3TTY5	CON__P04264	22;2;1;1;1;1;1	22;2;1;1;1;1;1	14;0;0;0;0;0;0	>P04264 SWISS-PROT:P04264 Tax_Id=9606 Gene_Symbol=KRT1 Keratin, type II cytoskeletal 1	7	22	22	14	38	38	25.3	66.017	644	644;572;99;524;539;578;707	0	227.39	219940000	84			+	5	26;200;210;282;318;393;482;551;573;645;654;688;732;741;742;743;751;802;809;813;814;958	True;True;True;True;True;True;True;True;True;True;True;True;True;True;True;True;True;True;True;True;True;True	28;218;228;229;304;341;420;512;582;604;684;693;694;729;774;783;784;785;793;845;852;856;857;1003	48;49;365;381;382;383;384;501;502;555;692;693;858;997;998;1027;1028;1168;1169;1184;1185;1186;1187;1248;1317;1318;1331;1332;1333;1334;1335;1336;1346;1347;1452;1460;1466;1467;1468;1469;1470;1725;1726	126;127;736;764;765;766;767;768;952;953;954;955;956;957;958;959;960;961;1037;1038;1290;1291;1292;1597;1855;1856;1857;1858;1896;1897;2193;2194;2195;2196;2197;2198;2224;2225;2226;2227;2228;2229;2333;2334;2335;2442;2443;2444;2462;2463;2464;2465;2466;2467;2468;2469;2470;2471;2472;2473;2474;2488;2489;2490;2491;2492;2493;2494;2751;2759;2760;2761;2762;2763;2769;2770;2771;2772;2773;2774;2775;3238;3239;32…	127;736;764;953;1038;1290;1597;1858;1896;2193;2226;2333;2444;2462;2463;2467;2488;2751;2759;2772;2774;3238	4;5;6	259;262;469
CON__P07477	CON__P07477	1	1	1	>P07477 SWISS-PROT:P07477 Tax_Id=9606 Gene_Symbol=PRSS1 Trypsin-1 precursor	1	1	1	1	8.1	8.1	8.1	26.558	247	247	0.010417	5.9247	72257000	3			+	6	511	TRUE	541	907;908	1714;1715;1716	1714
CON__P08779;CON__Q9Z2K1;CON__Q3ZAW8	CON__P08779	20;8;8	20;8;8	13;3;3	>P08779 SWISS-PROT:P08779 Tax_Id=9606 Gene_Symbol=KRT16 Keratin, type I cytoskeletal 16	3	20	20	13	50.7	50.7	38.3	51.267	473	473;469;474	0	215.72	212030000	86			+	7	76;108;129;155;189;260;339;412;441;501;539;638;699;726;786;803;826;884;895;921	True;True;True;True;True;True;True;True;True;True;True;True;True;True;True;True;True;True;True;True	84;120;142;170;206;281;363;364;440;471;531;569;676;677;740;768;829;846;869;927;938;965;966	142;143;207;208;242;287;288;350;351;460;461;594;595;723;724;725;726;775;776;777;778;779;885;886;977;978;1153;1154;1262;1306;1307;1423;1424;1453;1454;1489;1490;1598;1599;1613;1614;1661;1662	317;318;319;320;321;322;323;324;325;326;327;328;449;450;451;452;453;454;504;505;506;507;589;590;591;592;713;714;715;716;878;879;880;881;882;1123;1124;1125;1126;1343;1344;1345;1346;1347;1348;1349;1472;1473;1474;1475;1476;1636;1637;1638;1639;1640;1641;1642;1816;1817;1818;1819;2168;2169;2360;2431;2432;2681;2682;2752;2753;2801;2802;2803;2804;2805;2806;3015;3016;3017;3018;3019;3033;3034;3132;3133	325;453;505;591;713;881;1124;1343;1476;1636;1816;2168;2360;2431;2681;2753;2802;3016;3034;3133	2;7;8;9;10	121;239;259;274;353
CON__P13645;CON__P02535-1;CON__Q7Z3Z0;CON__Q7Z3Y8;CON__Q148H6;CON__Q7Z3Y7	CON__P13645	10;4;2;2;2;2	9;3;1;1;1;1	9;3;1;1;1;1	>P13645 SWISS-PROT:P13645 Tax_Id=9606 Gene_Symbol=KRT10 Keratin, type I cytoskeletal 10	6	10	9	9	18.9	17.4	17.4	59.51	593	593;570;450;459;464;486	0	56.509	23817000	21			+	8	77;153;252;499;698;748;762;885;921;961	True;True;True;True;True;True;True;True;False;True	85;168;272;529;739;790;805;928;965;966;1006	144;145;285;447;881;882;1261;1342;1343;1374;1375;1600;1601;1661;1662;1731	329;330;331;332;333;334;335;587;845;1629;1630;1631;1632;2359;2484;2485;2540;2541;3020;3021;3132;3133;3254	330;587;845;1631;2359;2484;2540;3020;3133;3254	2	150
CON__P13647	CON__P13647	11	4	2	>P13647 SWISS-PROT:P13647 Tax_Id=9606 Gene_Symbol=KRT5 Keratin, type II cytoskeletal 5	1	11	4	2	18.1	6.6	3.2	62.378	590	590	0	23.731	7002000	3			+	9	119;199;477;483;645;646;694;695;787;950;959	True;False;True;False;False;False;False;False;True;False;True	131;217;507;513;684;685;735;736;830;995;1004	225;226;364;847;859;1168;1169;1170;1171;1257;1258;1425;1709;1710;1727;1728	480;481;735;1580;1598;2193;2194;2195;2196;2197;2198;2199;2200;2201;2202;2203;2355;2356;2683;3200;3201;3202;3203;3204;3243;3244	481;735;1580;1598;2193;2200;2355;2356;2683;3201;3243
CON__P35527	CON__P35527	7	7	7	>P35527 SWISS-PROT:P35527 Tax_Id=9606 Gene_Symbol=KRT9 Keratin, type I cytoskeletal 9	1	7	7	7	16.9	16.9	16.9	62.129	623	623	0	63.038	30086000	14			+	10	171;295;366;418;616;733;910	True;True;True;True;True;True;True	186;318;392;447;649;650;775;953	317;526;647;648;741;1098;1099;1100;1319;1320;1642;1643	641;642;998;1217;1218;1393;2042;2043;2044;2445;2446;3095;3096;3097;3098	642;998;1218;1393;2043;2446;3096	11;12	234;245
CON__P48668	CON__P48668	18	1	0	>P48668 SWISS-PROT:P48668 Tax_Id=9606 Gene_Symbol=KRT6C Keratin, type II cytoskeletal 6C	1	18	1	0	31.4	1.8	0	60.024	564	564	0	8.5845	4774200	2			+	11	22;27;64;120;199;266;483;496;572;643;645;646;694;695;730;777;950;960	False;False;False;False;False;False;False;False;False;False;False;False;False;False;True;False;False;False	24;29;72;132;217;287;288;513;526;603;682;684;685;735;736;772;820;995;1005	41;42;50;51;122;123;227;228;364;472;473;474;475;859;876;877;1026;1162;1163;1164;1165;1168;1169;1170;1171;1257;1258;1313;1314;1402;1403;1709;1710;1729;1730	112;113;114;115;116;117;118;119;128;129;130;131;132;285;286;287;288;289;482;483;484;485;486;735;904;905;906;907;908;909;1598;1623;1624;1895;2178;2179;2180;2181;2182;2183;2184;2185;2186;2187;2193;2194;2195;2196;2197;2198;2199;2200;2201;2202;2203;2355;2356;2438;2439;2620;2621;2622;2623;2624;2625;3200;3201;3202;3203;3204;3245;3246;3247;3248;3249;3250;3251;3252;3253	113;131;288;483;735;907;1598;1624;1895;2179;2193;2200;2355;2356;2439;2620;3201;3249	3	452
CON__Streptavidin	CON__Streptavidin	4	4	4	>Streptavidin (S.avidinii)	1	4	4	4	43.1	43.1	43.1	16.622	160	160	0	160.54	871610000	136			+	12	435;626;767;956	True;True;True;True	465;664;810;1001	767;768;769;1126;1127;1128;1129;1130;1131;1132;1133;1134;1135;1136;1137;1382;1383;1384;1718;1719;1720;1721;1722;1723	1443;1444;1445;1446;1447;1448;1449;1450;1451;1452;1453;1454;1455;1456;1457;1458;1459;1460;1461;1462;1463;1464;1465;1466;2092;2093;2094;2095;2096;2097;2098;2099;2100;2101;2102;2103;2104;2105;2106;2107;2108;2109;2110;2111;2112;2113;2114;2115;2116;2117;2118;2119;2120;2121;2122;2123;2124;2125;2126;2127;2128;2129;2130;2131;2132;2133;2134;2135;2136;2137;2138;2139;2140;2141;2142;2143;2144;2145;2146;2548…	1444;2111;2559;3223
REV__tr|Q9HX93|Q9HX93_PSEAE	REV__tr|Q9HX93|Q9HX93_PSEAE	1	1	1	>tr|Q9HX93|Q9HX93_PSEAE Probable metal transporting P-type ATPase OS=Pseudomonas aeruginosa (strain ATCC 15692 / PAO1 / 1C / PRS 101 / LMG 12228) GN=PA3920 PE=3 SV=1	1	1	1	1	0	0	0	83.437	792	792	0.0054054	6.0651	159830000	4		+		13	35	TRUE	38	64;65	147;148;149;150	148
REV__tr|Q9HXW2|Q9HXW2_PSEAE	REV__tr|Q9HXW2|Q9HXW2_PSEAE	1	1	1	>tr|Q9HXW2|Q9HXW2_PSEAE Probable transcriptional regulator OS=Pseudomonas aeruginosa (strain ATCC 15692 / PAO1 / 1C / PRS 101 / LMG 12228) GN=PA3678 PE=4 SV=1	1	1	1	1	0	0	0	23.15	212	212	0.010526	5.9426	225450000	10		+		14	475	TRUE	505	845	1569;1570;1571;1572;1573;1574;1575;1576;1577;1578	1571
sp|G3XD23|WBPB_PSEAE	sp|G3XD23|WBPB_PSEAE	2	2	2	>sp|G3XD23|WBPB_PSEAE UDP-N-acetyl-2-amino-2-deoxy-D-glucuronate oxidase OS=Pseudomonas aeruginosa (strain ATCC 15692 / PAO1 / 1C / PRS 101 / LMG 12228) GN=wbpB PE=1 SV=1	1	2	2	2	10.1	10.1	10.1	35.717	316	316	0	12.372	4388100	4				15	2;715	True;True	2;756	2;1289;1290	2;2403;2404;2405	2;2404
sp|G3XD61|WBPI_PSEAE	sp|G3XD61|WBPI_PSEAE	1	1	1	>sp|G3XD61|WBPI_PSEAE UDP-2,3-diacetamido-2,3-dideoxy-D-glucuronate 2-epimerase OS=Pseudomonas aeruginosa (strain ATCC 15692 / PAO1 / 1C / PRS 101 / LMG 12228) GN=wbpI PE=1 SV=1	1	1	1	1	5.6	5.6	5.6	38.907	354	354	0.009901	5.7662	2158300	2				16	136	TRUE	149	255	527;528	527
sp|G3XD94|UGND_PSEAE	sp|G3XD94|UGND_PSEAE	3	3	3	>sp|G3XD94|UGND_PSEAE UDP-N-acetyl-D-glucosamine 6-dehydrogenase OS=Pseudomonas aeruginosa (strain ATCC 15692 / PAO1 / 1C / PRS 101 / LMG 12228) GN=wbpA PE=1 SV=1	1	3	3	3	9.2	9.2	9.2	48.155	436	436	0	16.786	4144600	1				17	258;321;602	True;True;True	279;344;634	457;559;1077	874;1045;2007	874;1045;2007
sp|O52759|RS4_PSEAE	sp|O52759|RS4_PSEAE	4	4	4	>sp|O52759|RS4_PSEAE 30S ribosomal protein S4 OS=Pseudomonas aeruginosa (strain ATCC 15692 / PAO1 / 1C / PRS 101 / LMG 12228) GN=rpsD PE=3 SV=2	1	4	4	4	19.9	19.9	19.9	23.277	206	206	0	31.791	26287000	10				18	68;362;492;574	True;True;True;True	76;387;522;605	130;131;638;639;871;872;1029;1030	301;302;1199;1200;1617;1618;1898;1899;1900;1901	301;1199;1618;1901
sp|O52760|RPOA_PSEAE	sp|O52760|RPOA_PSEAE	5	5	5	>sp|O52760|RPOA_PSEAE DNA-directed RNA polymerase subunit alpha OS=Pseudomonas aeruginosa (strain ATCC 15692 / PAO1 / 1C / PRS 101 / LMG 12228) GN=rpoA PE=3 SV=2	1	5	5	5	16.8	16.8	16.8	36.649	333	333	0	32.186	13888000	6				19	33;367;445;615;753	True;True;True;True;True	36;393;475;648;795	61;62;649;785;786;1097;1349	143;144;1219;1484;1485;2041;2496	144;1219;1485;2041;2496
sp|O52762|CATA_PSEAE	sp|O52762|CATA_PSEAE	15	15	15	>sp|O52762|CATA_PSEAE Catalase OS=Pseudomonas aeruginosa (strain ATCC 15692 / PAO1 / 1C / PRS 101 / LMG 12228) GN=katA PE=1 SV=1	1	15	15	15	47.1	47.1	47.1	55.588	482	482	0	133.89	87538000	43				20	182;187;207;300;337;341;502;506;522;582;622;824;844;938;944	True;True;True;True;True;True;True;True;True;True;True;True;True;True;True	198;204;225;323;360;361;366;532;536;552;613;660;867;887;983;989	336;348;375;376;532;589;590;591;598;887;888;895;924;925;1042;1043;1044;1121;1122;1485;1486;1487;1518;1687;1699;1700;1701	688;710;755;756;1007;1108;1109;1110;1111;1112;1130;1643;1644;1645;1646;1660;1738;1739;1740;1934;1935;1936;1937;1938;1939;1940;1941;1942;1943;2084;2085;2086;2087;2088;2795;2796;2797;2798;2799;2884;3171;3189;3190;3191;3192	688;710;756;1007;1109;1130;1645;1660;1740;1934;2085;2795;2884;3171;3189	13	30
sp|O54439|ACP1_PSEAE	sp|O54439|ACP1_PSEAE	1	1	1	>sp|O54439|ACP1_PSEAE Acyl carrier protein 1 OS=Pseudomonas aeruginosa (strain ATCC 15692 / PAO1 / 1C / PRS 101 / LMG 12228) GN=acpP1 PE=3 SV=4	1	1	1	1	20.5	20.5	20.5	8.7406	78	78	0	27.786	26686000	7				21	446	TRUE	476	787;788;789;790	1486;1487;1488;1489;1490;1491;1492	1487
sp|O68822|AMPA_PSEAE	sp|O68822|AMPA_PSEAE	5	5	5	>sp|O68822|AMPA_PSEAE Cytosol aminopeptidase OS=Pseudomonas aeruginosa (strain ATCC 15692 / PAO1 / 1C / PRS 101 / LMG 12228) GN=pepA PE=3 SV=1	1	5	5	5	12.9	12.9	12.9	52.331	495	495	0	39.248	7115500	5				22	141;218;460;531;547	True;True;True;True;True	156;237;490;561;577	266;397;813;965;990	561;784;785;1518;1800;1834	561;784;1518;1800;1834
sp|O69753|PHZB1_PSEAE	sp|O69753|PHZB1_PSEAE	3	1	1	>sp|O69753|PHZB1_PSEAE Phenazine biosynthesis protein PhzB 1 OS=Pseudomonas aeruginosa (strain ATCC 15692 / PAO1 / 1C / PRS 101 / LMG 12228) GN=phzB1 PE=3 SV=1	1	3	1	1	22.2	9.9	9.9	18.888	162	162	0	11	6596200	3				23	91;229;676	False;False;True	99;248;717	165;166;412;413;1227;1228	363;364;365;366;367;801;802;803;804;805;2288;2289;2290	364;803;2290
sp|O69754|PHZF_PSEAE	sp|O69754|PHZF_PSEAE	3	3	3	>sp|O69754|PHZF_PSEAE Trans-2,3-dihydro-3-hydroxyanthranilate isomerase OS=Pseudomonas aeruginosa (strain ATCC 15692 / PAO1 / 1C / PRS 101 / LMG 12228) GN=phzF1 PE=3 SV=2	1	3	3	3	20.9	20.9	20.9	30.342	278	278	0	18.224	5212300	2				24	372;597;674	True;True;True	398;628;715	659;1068;1224	1236;1986;2280	1236;1986;2280
sp|O82850|RS2_PSEAE	sp|O82850|RS2_PSEAE	5	5	5	>sp|O82850|RS2_PSEAE 30S ribosomal protein S2 OS=Pseudomonas aeruginosa (strain ATCC 15692 / PAO1 / 1C / PRS 101 / LMG 12228) GN=rpsB PE=3 SV=2	1	5	5	5	34.6	34.6	34.6	27.336	246	246	0	33.984	18036000	6				25	175;184;518;811;946	True;True;True;True;True	190;201;548;854;991	322;341;919;1462;1463;1704;1705	651;700;1732;2765;2766;3195;3196	651;700;1732;2766;3195
sp|O82851|EFTS_PSEAE	sp|O82851|EFTS_PSEAE	5	5	5	>sp|O82851|EFTS_PSEAE Elongation factor Ts OS=Pseudomonas aeruginosa (strain ATCC 15692 / PAO1 / 1C / PRS 101 / LMG 12228) GN=tsf PE=3 SV=1	1	5	5	5	19.7	19.7	19.7	30.653	289	289	0	38.815	34314000	12				26	30;280;316;378;579	True;True;True;True;True	32;33;302;339;404;610	55;56;57;497;498;553;668;669;1037;1038	137;138;139;946;947;1035;1245;1246;1247;1926;1927;1928;1929	138;947;1035;1245;1927
sp|O86428|ILVE_PSEAE	sp|O86428|ILVE_PSEAE	2	2	2	>sp|O86428|ILVE_PSEAE Branched-chain-amino-acid aminotransferase OS=Pseudomonas aeruginosa (strain ATCC 15692 / PAO1 / 1C / PRS 101 / LMG 12228) GN=ilvE PE=1 SV=2	1	2	2	2	11.4	11.4	11.4	34.084	307	307	0	12.828	6769800	3				27	158;665	True;True	173;706	298;1210;1211	602;2262;2263	602;2263
sp|P04739|FMPO_PSEAE	sp|P04739|FMPO_PSEAE	2	2	2	>sp|P04739|FMPO_PSEAE Fimbrial protein OS=Pseudomonas aeruginosa (strain ATCC 15692 / PAO1 / 1C / PRS 101 / LMG 12228) GN=pilA PE=1 SV=1	1	2	2	2	20.8	20.8	20.8	15.512	149	149	0	14.374	3532200	5				28	409;768	True;True	437;811	718;719;1385	1336;1337;1338;1339;2582	1338;2582
sp|P05384|DBHB_PSEAE	sp|P05384|DBHB_PSEAE	2	2	2	>sp|P05384|DBHB_PSEAE DNA-binding protein HU-beta OS=Pseudomonas aeruginosa (strain ATCC 15692 / PAO1 / 1C / PRS 101 / LMG 12228) GN=hupB PE=1 SV=3	1	2	2	2	32.2	32.2	32.2	9.0865	90	90	0	22.202	25035000	6				29	73;724	True;True	81;766	138;139;1303	311;312;313;314;2427;2428	312;2427
sp|P08308|OTCC_PSEAE	sp|P08308|OTCC_PSEAE	11	11	11	>sp|P08308|OTCC_PSEAE Ornithine carbamoyltransferase, catabolic OS=Pseudomonas aeruginosa (strain ATCC 15692 / PAO1 / 1C / PRS 101 / LMG 12228) GN=arcB PE=1 SV=3	1	11	11	11	51.2	51.2	51.2	38.108	336	336	0	79.095	149580000	35				30	240;246;270;312;347;581;621;640;657;686;973	True;True;True;True;True;True;True;True;True;True;True	259;265;266;292;335;372;612;658;659;679;697;698;727;1018	427;428;429;438;439;481;482;546;610;611;1040;1041;1118;1119;1120;1156;1157;1158;1191;1192;1193;1245;1750;1751	821;822;823;834;835;836;916;917;918;919;920;921;1027;1154;1155;1156;1157;1931;1932;1933;2079;2080;2081;2082;2083;2171;2172;2173;2174;2233;2234;2235;2236;2237;2238;2327;3297;3298;3299	822;836;921;1027;1156;1931;2080;2172;2236;2327;3298	14;15;16	101;169;261
sp|P09591|EFTU_PSEAE	sp|P09591|EFTU_PSEAE	17	17	17	>sp|P09591|EFTU_PSEAE Elongation factor Tu OS=Pseudomonas aeruginosa (strain ATCC 15692 / PAO1 / 1C / PRS 101 / LMG 12228) GN=tufA PE=1 SV=2	1	17	17	17	56.7	56.7	56.7	43.369	397	397	0	235.18	614870000	185				31	20;41;48;63;161;177;178;239;328;340;360;585;618;644;700;830;911	True;True;True;True;True;True;True;True;True;True;True;True;True;True;True;True;True	20;21;22;45;53;70;71;176;192;193;194;258;351;365;385;616;653;654;655;683;741;873;954	31;32;33;34;35;36;37;38;39;77;78;90;91;117;118;119;120;121;304;305;324;325;326;327;328;329;330;425;426;574;575;576;577;596;597;634;635;636;1047;1048;1049;1103;1104;1105;1106;1107;1108;1109;1110;1111;1112;1166;1167;1263;1264;1497;1498;1644	82;83;84;85;86;87;88;89;90;91;92;93;94;95;96;97;98;99;100;101;102;103;104;105;106;107;108;109;110;168;169;188;189;190;191;192;193;194;195;196;197;198;199;200;252;253;254;255;256;257;258;259;260;261;262;263;264;265;266;267;268;269;270;271;272;273;274;275;276;277;278;279;280;281;282;283;284;615;616;653;654;655;656;657;658;659;660;661;662;663;664;665;666;667;668;669;670;671;672;673;674;819;820;1070;…	82;169;188;254;615;661;674;819;1075;1127;1194;1947;2069;2188;2366;2819;3100	17;18;19;20;21;22	140;152;177;216;362;372
sp|P11221|OPRI_PSEAE	sp|P11221|OPRI_PSEAE	1	1	1	>sp|P11221|OPRI_PSEAE Major outer membrane lipoprotein OS=Pseudomonas aeruginosa (strain ATCC 15692 / PAO1 / 1C / PRS 101 / LMG 12228) GN=oprI PE=3 SV=1	1	1	1	1	13.3	13.3	13.3	8.8348	83	83	0	6.7859	274980	1				32	457	TRUE	487	808	1513	1513
sp|P11436|AMIE_PSEAE	sp|P11436|AMIE_PSEAE	1	1	1	>sp|P11436|AMIE_PSEAE Aliphatic amidase OS=Pseudomonas aeruginosa (strain ATCC 15692 / PAO1 / 1C / PRS 101 / LMG 12228) GN=amiE PE=1 SV=2	1	1	1	1	3.8	3.8	3.8	38.494	346	346	0	6.2967	337280	1				33	361	TRUE	386	637	1198	1198
sp|P13794|PORF_PSEAE	sp|P13794|PORF_PSEAE	7	7	7	>sp|P13794|PORF_PSEAE Outer membrane porin F OS=Pseudomonas aeruginosa (strain ATCC 15692 / PAO1 / 1C / PRS 101 / LMG 12228) GN=oprF PE=1 SV=1	1	7	7	7	25.7	25.7	25.7	37.639	350	350	0	62.317	59258000	30				34	127;204;702;709;880;899;900	True;True;True;True;True;True;True	140;222;743;750;923;942;943	239;369;370;1266;1267;1280;1281;1590;1591;1619;1620;1621;1622	500;501;740;741;742;743;744;745;746;747;748;749;750;2370;2371;2372;2373;2374;2393;2394;2395;2998;2999;3039;3040;3041;3042;3043;3044;3045	500;746;2371;2393;2999;3039;3044
sp|P13981|ARCA_PSEAE	sp|P13981|ARCA_PSEAE	17	17	17	>sp|P13981|ARCA_PSEAE Arginine deiminase OS=Pseudomonas aeruginosa (strain ATCC 15692 / PAO1 / 1C / PRS 101 / LMG 12228) GN=arcA PE=1 SV=2	1	17	17	17	46.4	46.4	46.4	46.435	418	418	0	246.01	492240000	145				35	55;169;181;264;326;443;463;478;667;680;684;708;776;793;794;878;928	True;True;True;True;True;True;True;True;True;True;True;True;True;True;True;True;True	61;184;197;285;349;473;493;508;708;721;725;749;819;836;837;921;973	103;104;314;315;334;335;467;468;469;470;569;570;571;782;783;817;818;848;849;850;851;1213;1214;1234;1235;1242;1243;1276;1277;1278;1279;1400;1401;1434;1435;1436;1437;1438;1439;1440;1441;1442;1588;1672;1673	228;229;230;231;232;630;631;632;633;634;635;636;637;638;681;682;683;684;685;686;687;892;893;894;895;896;897;898;899;900;901;902;1057;1058;1059;1060;1061;1062;1063;1064;1480;1481;1482;1523;1524;1525;1526;1527;1528;1581;1582;1583;1584;1585;1586;1587;1588;1589;1590;2265;2266;2267;2268;2269;2270;2301;2302;2303;2304;2305;2306;2307;2308;2323;2324;2325;2384;2385;2386;2387;2388;2389;2390;2391;2392;2612;2…	231;635;682;898;1061;1480;1528;1586;2266;2301;2323;2385;2617;2697;2733;2996;3151
sp|P13982|ARCC_PSEAE	sp|P13982|ARCC_PSEAE	5	5	5	>sp|P13982|ARCC_PSEAE Carbamate kinase OS=Pseudomonas aeruginosa (strain ATCC 15692 / PAO1 / 1C / PRS 101 / LMG 12228) GN=arcC PE=3 SV=1	1	5	5	5	26.1	26.1	26.1	33.08	310	310	0	51.309	35625000	14				36	60;159;452;513;840	True;True;True;True;True	66;174;482;543;883	110;111;299;300;800;801;910;911;1511;1512	238;239;240;241;603;604;605;606;607;1503;1504;1719;1720;2842;2843;2844	238;606;1504;1720;2844
sp|P14165|CISY_PSEAE	sp|P14165|CISY_PSEAE	2	2	2	>sp|P14165|CISY_PSEAE Citrate synthase OS=Pseudomonas aeruginosa (strain ATCC 15692 / PAO1 / 1C / PRS 101 / LMG 12228) GN=gltA PE=3 SV=2	1	2	2	2	5.4	5.4	5.4	47.694	428	428	0	13.871	2644300	3				37	603;639	True;True	635;678	1078;1155	2008;2009;2170	2008;2170
sp|P15276|ALGP_PSEAE	sp|P15276|ALGP_PSEAE	1	1	1	>sp|P15276|ALGP_PSEAE Transcriptional regulatory protein AlgP OS=Pseudomonas aeruginosa (strain ATCC 15692 / PAO1 / 1C / PRS 101 / LMG 12228) GN=algP PE=4 SV=2	1	1	1	1	4	4	4	34.49	352	352	0	27.158	18137000	3				38	259	TRUE	280	458;459	875;876;877	875
sp|P28810|MMSA_PSEAE	sp|P28810|MMSA_PSEAE	1	1	1	>sp|P28810|MMSA_PSEAE Methylmalonate-semialdehyde dehydrogenase [acylating] OS=Pseudomonas aeruginosa (strain ATCC 15692 / PAO1 / 1C / PRS 101 / LMG 12228) GN=mmsA PE=1 SV=2	1	1	1	1	3.4	3.4	3.4	53.663	497	497	0	7.3918	5686600	3				39	527	TRUE	557	960;961	1794;1795;1796	1794
sp|P30718|CH60_PSEAE	sp|P30718|CH60_PSEAE	29	29	29	>sp|P30718|CH60_PSEAE 60 kDa chaperonin OS=Pseudomonas aeruginosa (strain ATCC 15692 / PAO1 / 1C / PRS 101 / LMG 12228) GN=groL PE=1 SV=3	1	29	29	29	70.9	70.9	70.9	57.085	547	547	0	323.31	727670000	214				40	8;54;61;88;89;96;98;122;137;139;173;237;253;255;308;358;359;469;470;479;609;678;685;687;689;704;727;848;855	True;True;True;True;True;True;True;True;True;True;True;True;True;True;True;True;True;True;True;True;True;True;True;True;True;True;True;True;True	8;59;60;67;68;96;97;106;107;109;134;150;152;153;154;188;256;273;274;276;331;383;384;499;500;509;641;642;719;726;728;730;745;769;891;898	14;15;98;99;100;101;102;112;113;114;115;158;159;160;161;162;180;181;182;183;184;186;187;188;189;231;256;257;259;260;261;262;263;264;319;320;423;448;449;450;451;453;454;542;629;630;631;632;633;834;835;836;837;838;852;853;1087;1088;1089;1090;1231;1232;1244;1246;1247;1249;1250;1269;1270;1308;1309;1535;1536;1537;1552;1553	44;45;46;47;48;49;50;51;52;207;208;209;210;211;212;213;214;215;216;217;218;219;220;221;222;223;224;225;226;227;242;243;244;245;246;247;248;249;250;348;349;350;351;352;353;354;355;356;357;358;391;392;393;394;395;396;397;398;399;400;401;402;404;405;406;407;408;409;410;411;412;413;414;415;416;417;418;419;420;421;422;423;424;425;489;529;530;531;532;533;534;535;536;537;538;540;541;542;543;544;545;546;…	49;216;247;352;356;391;405;489;534;548;645;817;852;869;1021;1184;1192;1556;1558;1591;2030;2297;2326;2331;2337;2376;2433;2903;2925	23;24;25;26;27;28;29	16;111;114;166;233;267;288
sp|P30720|CH10_PSEAE	sp|P30720|CH10_PSEAE	1	1	1	>sp|P30720|CH10_PSEAE 10 kDa chaperonin OS=Pseudomonas aeruginosa (strain ATCC 15692 / PAO1 / 1C / PRS 101 / LMG 12228) GN=groS PE=3 SV=1	1	1	1	1	13.4	13.4	13.4	10.267	97	97	0.010309	5.9157	2403500	1				41	929	TRUE	974	1674	3154	3154
sp|P37798|ACCC_PSEAE	sp|P37798|ACCC_PSEAE	3	3	3	>sp|P37798|ACCC_PSEAE Biotin carboxylase OS=Pseudomonas aeruginosa (strain ATCC 15692 / PAO1 / 1C / PRS 101 / LMG 12228) GN=accC PE=1 SV=1	1	3	3	3	9.1	9.1	9.1	48.887	449	449	0	22.874	5238300	4				42	627;788;874	True;True;True	665;831;917	1138;1426;1582	2147;2684;2982;2983	2147;2684;2982
sp|P37799|BCCP_PSEAE	sp|P37799|BCCP_PSEAE	5	5	5	>sp|P37799|BCCP_PSEAE Biotin carboxyl carrier protein of acetyl-CoA carboxylase OS=Pseudomonas aeruginosa (strain ATCC 15692 / PAO1 / 1C / PRS 101 / LMG 12228) GN=accB PE=3 SV=1	1	5	5	5	53.2	53.2	53.2	16.455	156	156	0	150.39	1215700000	165				43	6;465;526;758;779	True;True;True;True;True	6;495;556;800;801;822	8;9;10;11;821;822;823;824;825;826;827;828;933;934;935;936;937;938;939;940;941;942;943;944;945;946;947;948;949;950;951;952;953;954;955;956;957;958;959;1355;1356;1357;1358;1359;1360;1361;1362;1363;1364;1365;1366;1367;1368;1369;1405;1406;1407;1408;1409;1410	11;12;13;14;15;16;17;18;19;20;21;22;23;24;25;26;27;28;29;30;31;32;33;34;35;36;37;38;39;40;41;1531;1532;1533;1534;1535;1536;1537;1538;1539;1540;1541;1542;1543;1544;1545;1546;1547;1548;1748;1749;1750;1751;1752;1753;1754;1755;1756;1757;1758;1759;1760;1761;1762;1763;1764;1765;1766;1767;1768;1769;1770;1771;1772;1773;1774;1775;1776;1777;1778;1779;1780;1781;1782;1783;1784;1785;1786;1787;1788;1789;1790;1…	13;1534;1781;2514;2628	30	87
sp|P38100|CARB_PSEAE	sp|P38100|CARB_PSEAE	2	2	2	>sp|P38100|CARB_PSEAE Carbamoyl-phosphate synthase large chain OS=Pseudomonas aeruginosa (strain ATCC 15692 / PAO1 / 1C / PRS 101 / LMG 12228) GN=carB PE=3 SV=3	1	2	2	2	2.9	2.9	2.9	117.33	1073	1073	0	14.796	3427400	6				44	590;818	True;True	621;861	1056;1057;1476	1965;1966;1967;1968;1969;2781	1969;2781
sp|P43336|PHHC_PSEAE	sp|P43336|PHHC_PSEAE	7	7	7	>sp|P43336|PHHC_PSEAE Aromatic-amino-acid aminotransferase OS=Pseudomonas aeruginosa (strain ATCC 15692 / PAO1 / 1C / PRS 101 / LMG 12228) GN=phhC PE=3 SV=2	1	7	7	7	27.6	27.6	27.6	43.273	399	399	0	49.24	16612000	7				45	11;408;476;571;651;906;919	True;True;True;True;True;True;True	11;436;506;602;690;949;963	19;717;846;1025;1179;1634;1635;1658	61;1335;1579;1894;2218;3085;3086;3127	61;1335;1579;1894;2218;3086;3127
sp|P47204|FTSZ_PSEAE	sp|P47204|FTSZ_PSEAE	1	1	1	>sp|P47204|FTSZ_PSEAE Cell division protein FtsZ OS=Pseudomonas aeruginosa (strain ATCC 15692 / PAO1 / 1C / PRS 101 / LMG 12228) GN=ftsZ PE=1 SV=2	1	1	1	1	4.8	4.8	4.8	41.218	394	394	0	7.1705	429470	1				46	926	TRUE	971	1669	3143	3143
sp|P47205|LPXC_PSEAE	sp|P47205|LPXC_PSEAE	1	1	1	>sp|P47205|LPXC_PSEAE UDP-3-O-acyl-N-acetylglucosamine deacetylase OS=Pseudomonas aeruginosa (strain ATCC 15692 / PAO1 / 1C / PRS 101 / LMG 12228) GN=lpxC PE=1 SV=2	1	1	1	1	6.6	6.6	6.6	33.435	303	303	0.0098039	5.7568	309160	2				47	421	TRUE	450	745	1400;1401	1401
sp|P48247|GSA_PSEAE	sp|P48247|GSA_PSEAE	1	1	1	>sp|P48247|GSA_PSEAE Glutamate-1-semialdehyde 2,1-aminomutase OS=Pseudomonas aeruginosa (strain ATCC 15692 / PAO1 / 1C / PRS 101 / LMG 12228) GN=hemL PE=1 SV=2	1	1	1	1	3.3	3.3	3.3	45.397	427	427	0.0095694	5.7064	551440	1				48	363	TRUE	388	640	1201	1201
sp|P53593|SUCC_PSEAE	sp|P53593|SUCC_PSEAE	12	12	12	>sp|P53593|SUCC_PSEAE Succinyl-CoA ligase [ADP-forming] subunit beta OS=Pseudomonas aeruginosa (strain ATCC 15692 / PAO1 / 1C / PRS 101 / LMG 12228) GN=sucC PE=3 SV=2	1	12	12	12	39.7	39.7	39.7	41.542	388	388	0	133.67	120080000	51				49	39;132;143;243;403;433;498;504;611;650;692;881	True;True;True;True;True;True;True;True;True;True;True;True	43;145;158;262;431;463;528;534;644;689;733;924	73;74;247;269;270;432;433;709;710;711;763;764;879;880;890;891;1093;1176;1177;1178;1255;1592;1593;1594;1595	163;164;165;513;514;515;564;565;566;567;826;827;1326;1327;1328;1437;1438;1439;1440;1626;1627;1628;1648;1649;1650;1651;1652;1653;2036;2210;2211;2212;2213;2214;2215;2216;2217;2352;2353;3000;3001;3002;3003;3004;3005;3006;3007;3008;3009;3010;3011	163;513;566;826;1327;1437;1628;1648;2036;2214;2353;3009
sp|P53641|SODF_PSEAE	sp|P53641|SODF_PSEAE	6	6	6	>sp|P53641|SODF_PSEAE Superoxide dismutase [Fe] OS=Pseudomonas aeruginosa (strain ATCC 15692 / PAO1 / 1C / PRS 101 / LMG 12228) GN=sodB PE=3 SV=3	1	6	6	6	38.3	38.3	38.3	21.351	193	193	0	43.416	44141000	19				50	42;279;628;744;828;979	True;True;True;True;True;True	46;301;666;786;871;1024	79;80;495;496;1139;1337;1493;1494;1760;1761	170;171;172;173;174;944;945;2148;2475;2476;2477;2809;2810;2811;2812;2813;3312;3313;3314;3315;3316	170;944;2148;2476;2810;3314
sp|P57668|TPX_PSEAE	sp|P57668|TPX_PSEAE	2	2	2	>sp|P57668|TPX_PSEAE Probable thiol peroxidase OS=Pseudomonas aeruginosa (strain ATCC 15692 / PAO1 / 1C / PRS 101 / LMG 12228) GN=tpx PE=3 SV=1	1	2	2	2	18.8	18.8	18.8	17.234	165	165	0	11.568	2517600	2				51	150;228	True;True	165;247	280;411	579;800	579;800
sp|P72173|AAT_PSEAE	sp|P72173|AAT_PSEAE	2	2	2	>sp|P72173|AAT_PSEAE Aspartate aminotransferase OS=Pseudomonas aeruginosa (strain ATCC 15692 / PAO1 / 1C / PRS 101 / LMG 12228) GN=aspC PE=3 SV=2	1	2	2	2	6.3	6.3	6.3	43.319	398	398	0	12.608	2062900	2				52	936;980	True;True	981;1025	1682;1762;1763	3162;3317;3318	3162;3318
sp|P80358|ASTG_PSEAE	sp|P80358|ASTG_PSEAE	1	1	1	>sp|P80358|ASTG_PSEAE Arginine N-succinyltransferase subunit beta OS=Pseudomonas aeruginosa (strain ATCC 15692 / PAO1 / 1C / PRS 101 / LMG 12228) GN=aruG PE=1 SV=2	1	1	1	1	4.1	4.1	4.1	37.245	340	340	0.010256	5.9135	501100	0				53	930	TRUE	975	1675	3155	3155
sp|Q51422|SYDND_PSEAE	sp|Q51422|SYDND_PSEAE	1	1	1	>sp|Q51422|SYDND_PSEAE Aspartate--tRNA(Asp/Asn) ligase OS=Pseudomonas aeruginosa (strain ATCC 15692 / PAO1 / 1C / PRS 101 / LMG 12228) GN=aspS PE=1 SV=2	1	1	1	1	2.2	2.2	2.2	66.207	591	591	0	6.3676	1463000	1				54	437	TRUE	467	771	1468	1468
sp|Q51561|RPOB_PSEAE	sp|Q51561|RPOB_PSEAE	8	8	8	>sp|Q51561|RPOB_PSEAE DNA-directed RNA polymerase subunit beta OS=Pseudomonas aeruginosa (strain ATCC 15692 / PAO1 / 1C / PRS 101 / LMG 12228) GN=rpoB PE=3 SV=2	1	8	8	8	7.4	7.4	7.4	150.84	1357	1357	0	50.747	12807000	10				55	58;103;310;449;701;790;916;955	True;True;True;True;True;True;True;True	64;115;333;479;742;833;960;1000	107;199;544;795;796;1265;1428;1429;1654;1717	235;436;1025;1498;1499;2368;2369;2686;2687;2688;3122;3213	235;436;1025;1499;2369;2686;3122;3213
sp|Q51567|SUCD_PSEAE	sp|Q51567|SUCD_PSEAE	9	9	9	>sp|Q51567|SUCD_PSEAE Succinyl-CoA ligase [ADP-forming] subunit alpha OS=Pseudomonas aeruginosa (strain ATCC 15692 / PAO1 / 1C / PRS 101 / LMG 12228) GN=sucD PE=3 SV=2	1	9	9	9	45.4	45.4	45.4	30.266	295	295	0	64.643	67558000	35				56	71;101;195;267;322;405;505;600;737	True;True;True;True;True;True;True;True;True	79;113;213;289;345;433;535;632;779	134;135;194;195;196;359;360;476;477;560;561;562;563;713;714;892;893;894;1075;1325;1326	306;307;308;430;431;432;433;727;728;729;730;731;910;911;912;1046;1047;1048;1049;1050;1330;1331;1654;1655;1656;1657;1658;1659;2005;2451;2452;2453;2454;2455;2456	307;432;728;911;1047;1331;1654;2005;2451
sp|Q59636|NDK_PSEAE	sp|Q59636|NDK_PSEAE	4	4	4	>sp|Q59636|NDK_PSEAE Nucleoside diphosphate kinase OS=Pseudomonas aeruginosa (strain ATCC 15692 / PAO1 / 1C / PRS 101 / LMG 12228) GN=ndk PE=3 SV=2	1	4	4	4	37.8	37.8	37.8	15.592	143	143	0	26.021	13401000	10				57	180;248;669;812	True;True;True;True	196;268;710;855	332;333;441;1216;1217;1464;1465	676;677;678;679;680;838;2272;2273;2767;2768	678;838;2273;2767
sp|Q59637|ODP1_PSEAE	sp|Q59637|ODP1_PSEAE	15	15	15	>sp|Q59637|ODP1_PSEAE Pyruvate dehydrogenase E1 component OS=Pseudomonas aeruginosa (strain ATCC 15692 / PAO1 / 1C / PRS 101 / LMG 12228) GN=aceE PE=3 SV=2	1	15	15	15	19.7	19.7	19.7	99.563	882	882	0	90.015	25712000	18				58	4;198;212;238;242;299;333;415;442;473;565;593;633;666;939	True;True;True;True;True;True;True;True;True;True;True;True;True;True;True	4;216;231;257;261;322;356;443;472;503;596;624;671;707;984	4;363;386;424;431;531;584;731;780;781;843;1018;1062;1145;1212;1688;1689	4;734;770;818;825;1006;1098;1354;1477;1478;1479;1567;1886;1977;1978;2157;2264;3172;3173	4;734;770;818;825;1006;1098;1354;1477;1567;1886;1977;2157;2264;3173
sp|Q59638|ODP2_PSEAE	sp|Q59638|ODP2_PSEAE	8	8	8	>sp|Q59638|ODP2_PSEAE Dihydrolipoyllysine-residue acetyltransferase component of pyruvate dehydrogenase complex OS=Pseudomonas aeruginosa (strain ATCC 15692 / PAO1 / 1C / PRS 101 / LMG 12228) GN=aceF PE=2 SV=2	1	8	8	8	25.4	25.4	25.4	56.708	547	547	0	55.832	11753000	13				59	23;25;28;249;512;534;750;857	True;True;True;True;True;True;True;True	25;27;30;269;542;564;792;900	43;46;47;52;442;909;971;1345;1555	120;123;124;125;133;839;1717;1718;1806;1807;1808;2487;2935	120;123;133;839;1717;1808;2487;2935
sp|Q9HT14|ATP6_PSEAE	sp|Q9HT14|ATP6_PSEAE	2	2	2	>sp|Q9HT14|ATP6_PSEAE ATP synthase subunit a OS=Pseudomonas aeruginosa (strain ATCC 15692 / PAO1 / 1C / PRS 101 / LMG 12228) GN=atpB PE=3 SV=1	1	2	2	2	14.2	14.2	14.2	31.92	289	289	0	11.356	3097300	2				60	135;568	True;True	148;599	254;1021	526;1890	526;1890
sp|Q9HT16|ATPF_PSEAE	sp|Q9HT16|ATPF_PSEAE	5	5	5	>sp|Q9HT16|ATPF_PSEAE ATP synthase subunit b OS=Pseudomonas aeruginosa (strain ATCC 15692 / PAO1 / 1C / PRS 101 / LMG 12228) GN=atpF PE=3 SV=1	1	5	5	5	37.2	37.2	37.2	16.956	156	156	0	36.251	11461000	6				61	100;112;114;118;375	True;True;True;True;True	112;124;126;130;401	193;213;214;216;224;664	429;463;464;466;479;1241	429;463;466;479;1241
sp|Q9HT18|ATPA_PSEAE	sp|Q9HT18|ATPA_PSEAE	13	13	13	>sp|Q9HT18|ATPA_PSEAE ATP synthase subunit alpha OS=Pseudomonas aeruginosa (strain ATCC 15692 / PAO1 / 1C / PRS 101 / LMG 12228) GN=atpA PE=3 SV=1	1	13	13	13	28.2	28.2	28.2	55.393	514	514	0	109.43	94988000	43				62	190;220;306;314;422;471;634;771;772;782;867;917;925	True;True;True;True;True;True;True;True;True;True;True;True;True	207;239;329;337;451;501;672;814;815;825;910;961;970	352;400;401;539;540;549;550;746;747;839;840;1146;1147;1391;1392;1393;1394;1413;1414;1572;1573;1655;1656;1668	717;788;789;1016;1017;1018;1019;1030;1031;1032;1402;1403;1404;1405;1406;1560;1561;1562;2158;2159;2160;2161;2591;2592;2593;2594;2595;2596;2597;2598;2599;2600;2601;2668;2669;2670;2968;2969;2970;3123;3124;3125;3141;3142	717;788;1016;1031;1402;1560;2159;2592;2597;2668;2968;3123;3142
sp|Q9HT19|ATPG_PSEAE	sp|Q9HT19|ATPG_PSEAE	4	4	4	>sp|Q9HT19|ATPG_PSEAE ATP synthase gamma chain OS=Pseudomonas aeruginosa (strain ATCC 15692 / PAO1 / 1C / PRS 101 / LMG 12228) GN=atpG PE=3 SV=1	1	4	4	4	22.7	22.7	22.7	31.553	286	286	0	27.2	11806000	4				63	631;728;747;869	True;True;True;True	669;770;789;912	1143;1310;1311;1341;1576	2155;2435;2436;2483;2973	2155;2436;2483;2973
sp|Q9HT20|ATPB_PSEAE	sp|Q9HT20|ATPB_PSEAE	9	9	9	>sp|Q9HT20|ATPB_PSEAE ATP synthase subunit beta OS=Pseudomonas aeruginosa (strain ATCC 15692 / PAO1 / 1C / PRS 101 / LMG 12228) GN=atpD PE=3 SV=1	1	9	9	9	29.9	29.9	29.9	49.499	458	458	0	106.31	51245000	21				64	170;203;217;431;690;838;839;863;978	True;True;True;True;True;True;True;True;True	185;221;236;461;731;881;882;906;1023	316;368;395;396;759;760;1251;1252;1508;1509;1510;1567;1758;1759	639;640;739;781;782;783;1431;1432;1433;2345;2346;2347;2835;2836;2837;2838;2839;2840;2841;2963;3310;3311	639;739;783;1431;2345;2838;2840;2963;3310
sp|Q9HT21|ATPE_PSEAE	sp|Q9HT21|ATPE_PSEAE	1	1	1	>sp|Q9HT21|ATPE_PSEAE ATP synthase epsilon chain OS=Pseudomonas aeruginosa (strain ATCC 15692 / PAO1 / 1C / PRS 101 / LMG 12228) GN=atpC PE=3 SV=1	1	1	1	1	9.9	9.9	9.9	14.726	141	141	0.0096618	5.7257	1509300	0				65	46	TRUE	51	88	186	186
sp|Q9HT95|ATSE4_PSEAE	sp|Q9HT95|ATSE4_PSEAE	2	2	2	>sp|Q9HT95|ATSE4_PSEAE Acetyltransferase PA5475 OS=Pseudomonas aeruginosa (strain ATCC 15692 / PAO1 / 1C / PRS 101 / LMG 12228) GN=PA5475 PE=3 SV=1	1	2	2	2	11.8	11.8	11.8	21	186	186	0	11.951	3844500	6				66	186;693	True;True	203;734	344;345;346;347;1256	705;706;707;708;709;2354	705;2354
sp|Q9HTD7|ASPA_PSEAE	sp|Q9HTD7|ASPA_PSEAE	5	5	5	>sp|Q9HTD7|ASPA_PSEAE Aspartate ammonia-lyase OS=Pseudomonas aeruginosa (strain ATCC 15692 / PAO1 / 1C / PRS 101 / LMG 12228) GN=aspA PE=3 SV=1	1	5	5	5	25.9	25.9	25.9	51.069	474	474	0	31.775	13269000	15				67	484;520;537;823;972	True;True;True;True;True	514;550;567;866;1017	860;921;974;975;1483;1484;1749	1599;1734;1735;1811;1812;1813;1814;2789;2790;2791;2792;2793;2794;3295;3296	1599;1734;1813;2790;3295
sp|Q9HTN8|RL28_PSEAE	sp|Q9HTN8|RL28_PSEAE	1	1	1	>sp|Q9HTN8|RL28_PSEAE 50S ribosomal protein L28 OS=Pseudomonas aeruginosa (strain ATCC 15692 / PAO1 / 1C / PRS 101 / LMG 12228) GN=rpmB PE=3 SV=1	1	1	1	1	12.8	12.8	12.8	9.0655	78	78	0	7.0783	8108000	5				68	327	TRUE	350	572;573	1065;1066;1067;1068;1069	1065
sp|Q9HU65|GLNA_PSEAE	sp|Q9HU65|GLNA_PSEAE	5	5	5	>sp|Q9HU65|GLNA_PSEAE Glutamine synthetase OS=Pseudomonas aeruginosa (strain ATCC 15692 / PAO1 / 1C / PRS 101 / LMG 12228) GN=glnA PE=1 SV=1	1	5	5	5	20	20	20	51.944	469	469	0	32.379	12202000	15				69	157;292;664;697;766	True;True;True;True;True	172;314;315;705;738;809	297;519;520;521;1206;1207;1208;1209;1260;1380;1381	601;988;989;990;991;992;2256;2257;2258;2259;2260;2261;2358;2546;2547	601;988;2258;2358;2546	31	377
sp|Q9HU73|F16PA_PSEAE	sp|Q9HU73|F16PA_PSEAE	1	1	1	>sp|Q9HU73|F16PA_PSEAE Fructose-1,6-bisphosphatase class 1 OS=Pseudomonas aeruginosa (strain ATCC 15692 / PAO1 / 1C / PRS 101 / LMG 12228) GN=fbp PE=3 SV=1	1	1	1	1	3.3	3.3	3.3	37.216	336	336	0.0093023	5.6472	450570	0				70	236	TRUE	255	422	815	815
sp|Q9HUC5|HSLU_PSEAE	sp|Q9HUC5|HSLU_PSEAE	3	3	3	>sp|Q9HUC5|HSLU_PSEAE ATP-dependent protease ATPase subunit HslU OS=Pseudomonas aeruginosa (strain ATCC 15692 / PAO1 / 1C / PRS 101 / LMG 12228) GN=hslU PE=3 SV=1	1	3	3	3	6.9	6.9	6.9	50.082	447	447	0	16.701	2937000	3				71	427;529;614	True;True;True	456;559;647	752;963;1096	1412;1413;1798;2040	1413;1798;2040
sp|Q9HUC8|SYR_PSEAE	sp|Q9HUC8|SYR_PSEAE	2	2	2	>sp|Q9HUC8|SYR_PSEAE Arginine--tRNA ligase OS=Pseudomonas aeruginosa (strain ATCC 15692 / PAO1 / 1C / PRS 101 / LMG 12228) GN=argS PE=3 SV=1	1	2	2	2	3.9	3.9	3.9	65.199	587	587	0	15.266	2164400	2				72	524;807	True;True	554;850	928;1458	1743;2757	1743;2757
sp|Q9HUM6|PURA_PSEAE	sp|Q9HUM6|PURA_PSEAE	4	4	4	>sp|Q9HUM6|PURA_PSEAE Adenylosuccinate synthetase OS=Pseudomonas aeruginosa (strain ATCC 15692 / PAO1 / 1C / PRS 101 / LMG 12228) GN=purA PE=3 SV=1	1	4	4	4	12.8	12.8	12.8	46.814	430	430	0	27.973	7288100	4				73	448;494;806;868	True;True;True;True	478;524;849;911	793;794;874;1457;1574;1575	1496;1497;1620;2756;2971;2972	1497;1620;2756;2971
sp|Q9HUM9|RS6_PSEAE	sp|Q9HUM9|RS6_PSEAE	2	2	2	>sp|Q9HUM9|RS6_PSEAE 30S ribosomal protein S6 OS=Pseudomonas aeruginosa (strain ATCC 15692 / PAO1 / 1C / PRS 101 / LMG 12228) GN=rpsF PE=3 SV=1	1	2	2	2	12.2	12.2	12.2	16.164	139	139	0	12.245	2751800	2				74	70;975	True;True	78;1020	133;1754	305;3306	305;3306
sp|Q9HUN0|RS18_PSEAE	sp|Q9HUN0|RS18_PSEAE	1	1	1	>sp|Q9HUN0|RS18_PSEAE 30S ribosomal protein S18 OS=Pseudomonas aeruginosa (strain ATCC 15692 / PAO1 / 1C / PRS 101 / LMG 12228) GN=rpsR PE=3 SV=1	1	1	1	1	17.1	17.1	17.1	8.8732	76	76	0	7.1614	6847400	2				75	969	TRUE	1014	1744;1745	3288;3289	3289
sp|Q9HV43|DNAK_PSEAE	sp|Q9HV43|DNAK_PSEAE	10	10	10	>sp|Q9HV43|DNAK_PSEAE Chaperone protein DnaK OS=Pseudomonas aeruginosa (strain ATCC 15692 / PAO1 / 1C / PRS 101 / LMG 12228) GN=dnaK PE=3 SV=1	1	10	10	10	22.6	22.6	22.6	68.402	637	637	0	92.461	54156000	20				76	21;80;130;414;461;525;610;620;682;705	True;True;True;True;True;True;True;True;True;True	23;88;143;442;491;555;643;657;723;746	40;148;149;243;244;729;730;814;929;930;931;932;1091;1092;1115;1116;1117;1240;1271;1272	111;338;339;508;509;510;1352;1353;1519;1744;1745;1746;1747;2033;2034;2035;2076;2077;2078;2320;2378;2379	111;339;508;1353;1519;1746;2033;2076;2320;2378
sp|Q9HV59|PNP_PSEAE	sp|Q9HV59|PNP_PSEAE	3	3	3	>sp|Q9HV59|PNP_PSEAE Polyribonucleotide nucleotidyltransferase OS=Pseudomonas aeruginosa (strain ATCC 15692 / PAO1 / 1C / PRS 101 / LMG 12228) GN=pnp PE=3 SV=1	1	3	3	3	6	6	6	75.452	701	701	0	20.671	7134000	6				77	102;202;432	True;True;True	114;220;462	197;198;367;761;762	434;435;738;1434;1435;1436	435;738;1435
sp|Q9HVA2|ILVC_PSEAE	sp|Q9HVA2|ILVC_PSEAE	3	3	3	>sp|Q9HVA2|ILVC_PSEAE Ketol-acid reductoisomerase OS=Pseudomonas aeruginosa (strain ATCC 15692 / PAO1 / 1C / PRS 101 / LMG 12228) GN=ilvC PE=1 SV=1	1	3	3	3	12.7	12.7	12.7	36.424	338	338	0	22.813	14249000	8				78	17;319;655	True;True;True	17;342;695	26;27;556;557;1188	68;69;1039;1040;1041;1042;1043;2230	68;1039;2230
sp|Q9HVC4|RL25_PSEAE	sp|Q9HVC4|RL25_PSEAE	3	3	3	>sp|Q9HVC4|RL25_PSEAE 50S ribosomal protein L25 OS=Pseudomonas aeruginosa (strain ATCC 15692 / PAO1 / 1C / PRS 101 / LMG 12228) GN=rplY PE=3 SV=1	1	3	3	3	27	27	27	21.962	204	204	0	30.363	30973000	8				79	348;542;852	True;True;True	373;572;895	612;982;983;1545;1546;1547;1548	1158;1824;1825;1826;2914;2915;2916;2917	1158;1825;2915
sp|Q9HVI7|GLYA3_PSEAE	sp|Q9HVI7|GLYA3_PSEAE	2	2	2	>sp|Q9HVI7|GLYA3_PSEAE Serine hydroxymethyltransferase 3 OS=Pseudomonas aeruginosa (strain ATCC 15692 / PAO1 / 1C / PRS 101 / LMG 12228) GN=glyA2 PE=3 SV=1	1	2	2	2	7	7	7	45.157	417	417	0	11.578	2354700	2				80	556;834	True;True	587;877	1005;1502	1868;2823;2824	1868;2824
sp|Q9HVM1|RS20_PSEAE	sp|Q9HVM1|RS20_PSEAE	1	1	1	>sp|Q9HVM1|RS20_PSEAE 30S ribosomal protein S20 OS=Pseudomonas aeruginosa (strain ATCC 15692 / PAO1 / 1C / PRS 101 / LMG 12228) GN=rpsT PE=1 SV=3	1	1	1	1	15.4	15.4	15.4	9.9175	91	91	0	6.7764	1940100	1				81	113	TRUE	125	215	465	465
sp|Q9HVN5|CLPB_PSEAE	sp|Q9HVN5|CLPB_PSEAE	4	4	2	>sp|Q9HVN5|CLPB_PSEAE Chaperone protein ClpB OS=Pseudomonas aeruginosa (strain ATCC 15692 / PAO1 / 1C / PRS 101 / LMG 12228) GN=clpB PE=3 SV=1	1	4	4	2	5.9	5.9	3.2	95.004	854	854	0	25.553	7262000	9				82	37;69;659;781	True;True;True;True	41;77;700;824	69;70;132;1195;1196;1412	159;160;303;304;2240;2241;2242;2243;2667	159;304;2241;2667
sp|Q9HVT8|GATA_PSEAE	sp|Q9HVT8|GATA_PSEAE	1	1	1	>sp|Q9HVT8|GATA_PSEAE Glutamyl-tRNA(Gln) amidotransferase subunit A OS=Pseudomonas aeruginosa (strain ATCC 15692 / PAO1 / 1C / PRS 101 / LMG 12228) GN=gatA PE=1 SV=1	1	1	1	1	3.3	3.3	3.3	51.862	484	484	0.009434	5.6804	1109600	2				83	907	TRUE	950	1636;1637	3087;3088	3087
sp|Q9HVW7|MURA_PSEAE	sp|Q9HVW7|MURA_PSEAE	1	1	1	>sp|Q9HVW7|MURA_PSEAE UDP-N-acetylglucosamine 1-carboxyvinyltransferase OS=Pseudomonas aeruginosa (strain ATCC 15692 / PAO1 / 1C / PRS 101 / LMG 12228) GN=murA PE=1 SV=1	1	1	1	1	2.4	2.4	2.4	44.645	421	421	0.0098522	5.7574	636390	1				84	601	TRUE	633	1076	2006	2006
sp|Q9HW11|Y4395_PSEAE	sp|Q9HW11|Y4395_PSEAE	2	2	2	>sp|Q9HW11|Y4395_PSEAE UPF0234 protein PA4395 OS=Pseudomonas aeruginosa (strain ATCC 15692 / PAO1 / 1C / PRS 101 / LMG 12228) GN=PA4395 PE=3 SV=1	1	2	2	2	21.4	21.4	21.4	18.044	159	159	0	14.235	7056700	5				85	679;909	True;True	720;952	1233;1640;1641	2299;2300;3092;3093;3094	2300;3092
sp|Q9HWC8|RL7_PSEAE	sp|Q9HWC8|RL7_PSEAE	2	2	2	>sp|Q9HWC8|RL7_PSEAE 50S ribosomal protein L7/L12 OS=Pseudomonas aeruginosa (strain ATCC 15692 / PAO1 / 1C / PRS 101 / LMG 12228) GN=rplL PE=3 SV=1	1	2	2	2	28.7	28.7	28.7	12.479	122	122	0	12.107	9390400	6				86	92;148	True;True	100;163	167;168;276;277	368;369;573;574;575;576	368;575
sp|Q9HWC9|RPOC_PSEAE	sp|Q9HWC9|RPOC_PSEAE	16	16	16	>sp|Q9HWC9|RPOC_PSEAE DNA-directed RNA polymerase subunit beta OS=Pseudomonas aeruginosa (strain ATCC 15692 / PAO1 / 1C / PRS 101 / LMG 12228) GN=rpoC PE=3 SV=1	1	16	16	16	15.7	15.7	15.7	154.38	1399	1399	0	105.19	31686000	22				87	176;234;250;272;407;413;519;528;538;587;598;663;729;873;896;968	True;True;True;True;True;True;True;True;True;True;True;True;True;True;True;True	191;253;270;294;435;441;549;558;568;618;629;704;771;916;939;1013	323;419;443;444;484;716;727;728;920;962;976;1052;1069;1070;1204;1205;1312;1581;1615;1743	652;812;840;841;842;923;1333;1334;1350;1351;1733;1797;1815;1961;1987;1988;2253;2254;2255;2437;2981;3035;3287	652;812;842;923;1333;1350;1733;1797;1815;1961;1987;2255;2437;2981;3035;3287
sp|Q9HWD1|RS7_PSEAE	sp|Q9HWD1|RS7_PSEAE	3	3	3	>sp|Q9HWD1|RS7_PSEAE 30S ribosomal protein S7 OS=Pseudomonas aeruginosa (strain ATCC 15692 / PAO1 / 1C / PRS 101 / LMG 12228) GN=rpsG PE=3 SV=1	1	3	3	3	22.4	22.4	22.4	17.504	156	156	0	18.208	10187000	5				88	72;862;947	True;True;True	80;905;992	136;137;1565;1566;1706	309;310;2961;2962;3197	310;2961;3197
sp|Q9HWD2|EFG1_PSEAE;sp|Q9I244|EFG2_PSEAE	sp|Q9HWD2|EFG1_PSEAE	18;6	18;6	18;6	>sp|Q9HWD2|EFG1_PSEAE Elongation factor G 1 OS=Pseudomonas aeruginosa (strain ATCC 15692 / PAO1 / 1C / PRS 101 / LMG 12228) GN=fusA PE=1 SV=1	2	18	18	18	40.2	40.2	40.2	77.784	706	706;702	0	182.06	129370000	62				89	36;45;138;226;294;334;352;353;384;485;517;594;637;764;853;942;952;970	True;True;True;True;True;True;True;True;True;True;True;True;True;True;True;True;True;True	39;40;49;50;151;245;317;357;377;378;410;515;547;625;675;807;896;987;997;1015	66;67;68;85;86;87;258;409;524;525;585;617;618;619;620;676;677;861;862;918;1063;1064;1151;1152;1377;1549;1550;1696;1697;1713;1714;1746;1747	151;152;153;154;155;156;157;158;181;182;183;184;185;539;798;996;997;1099;1100;1164;1165;1166;1167;1168;1169;1170;1171;1172;1173;1255;1256;1257;1600;1601;1602;1603;1730;1731;1979;1980;1981;1982;2166;2167;2543;2918;2919;2920;2921;2922;3182;3183;3184;3185;3186;3187;3208;3209;3210;3290;3291;3292;3293	151;182;539;798;996;1099;1165;1171;1255;1600;1730;1979;2166;2543;2918;3185;3208;3293	32;33	388;666
sp|Q9HWD5|RL3_PSEAE	sp|Q9HWD5|RL3_PSEAE	4	4	4	>sp|Q9HWD5|RL3_PSEAE 50S ribosomal protein L3 OS=Pseudomonas aeruginosa (strain ATCC 15692 / PAO1 / 1C / PRS 101 / LMG 12228) GN=rplC PE=3 SV=1	1	4	4	4	27	27	27	22.591	211	211	0	27.659	19864000	7				90	146;304;401;923	True;True;True;True	161;327;429;968	274;537;707;1664;1665	571;1014;1324;3135;3136;3137;3138	571;1014;1324;3135
sp|Q9HWD6|RL4_PSEAE	sp|Q9HWD6|RL4_PSEAE	1	1	1	>sp|Q9HWD6|RL4_PSEAE 50S ribosomal protein L4 OS=Pseudomonas aeruginosa (strain ATCC 15692 / PAO1 / 1C / PRS 101 / LMG 12228) GN=rplD PE=3 SV=1	1	1	1	1	4	4	4	21.64	200	200	0.005291	5.9859	1771300	1				91	740	TRUE	782	1330	2461	2461
sp|Q9HWD8|RL2_PSEAE	sp|Q9HWD8|RL2_PSEAE	4	4	4	>sp|Q9HWD8|RL2_PSEAE 50S ribosomal protein L2 OS=Pseudomonas aeruginosa (strain ATCC 15692 / PAO1 / 1C / PRS 101 / LMG 12228) GN=rplB PE=3 SV=1	1	4	4	4	21.6	21.6	21.6	29.579	273	273	0	38.629	28106000	12				92	133;345;346;710	True;True;True;True	146;370;371;751	248;249;250;251;606;607;608;609;1282	516;517;518;519;520;1148;1149;1150;1151;1152;1153;2396	517;1148;1151;2396
sp|Q9HWE0|RL22_PSEAE	sp|Q9HWE0|RL22_PSEAE	4	4	4	>sp|Q9HWE0|RL22_PSEAE 50S ribosomal protein L22 OS=Pseudomonas aeruginosa (strain ATCC 15692 / PAO1 / 1C / PRS 101 / LMG 12228) GN=rplV PE=3 SV=1	1	4	4	4	46.4	46.4	46.4	11.911	110	110	0	29.911	14094000	8				93	583;860;888;920	True;True;True;True	614;903;931;964	1045;1562;1604;1605;1659;1660	1944;2957;3024;3025;3128;3129;3130;3131	1944;2957;3024;3128
sp|Q9HWE1|RS3_PSEAE	sp|Q9HWE1|RS3_PSEAE	3	3	3	>sp|Q9HWE1|RS3_PSEAE 30S ribosomal protein S3 OS=Pseudomonas aeruginosa (strain ATCC 15692 / PAO1 / 1C / PRS 101 / LMG 12228) GN=rpsC PE=3 SV=1	1	3	3	3	18	18	18	25.838	228	228	0	19.457	10267000	5				94	386;466;673	True;True;True	412;496;714	679;680;829;830;1222;1223	1259;1260;1549;1550;1551;2278;2279	1260;1550;2278
sp|Q9HWE2|RL16_PSEAE	sp|Q9HWE2|RL16_PSEAE	3	3	3	>sp|Q9HWE2|RL16_PSEAE 50S ribosomal protein L16 OS=Pseudomonas aeruginosa (strain ATCC 15692 / PAO1 / 1C / PRS 101 / LMG 12228) GN=rplP PE=3 SV=1	1	3	3	3	23.4	23.4	23.4	15.401	137	137	0	21.723	12267000	5				95	566;897;918	True;True;True	597;940;962	1019;1616;1617;1657	1887;1888;3036;3037;3126	1888;3037;3126
sp|Q9HWE4|RS17_PSEAE	sp|Q9HWE4|RS17_PSEAE	2	2	2	>sp|Q9HWE4|RS17_PSEAE 30S ribosomal protein S17 OS=Pseudomonas aeruginosa (strain ATCC 15692 / PAO1 / 1C / PRS 101 / LMG 12228) GN=rpsQ PE=3 SV=1	1	2	2	2	20.5	20.5	20.5	10.086	88	88	0	12.394	3764100	4				96	151;402	True;True	166;430	281;282;708	580;581;582;1325	580;1325
sp|Q9HWE5|RL14_PSEAE	sp|Q9HWE5|RL14_PSEAE	2	2	2	>sp|Q9HWE5|RL14_PSEAE 50S ribosomal protein L14 OS=Pseudomonas aeruginosa (strain ATCC 15692 / PAO1 / 1C / PRS 101 / LMG 12228) GN=rplN PE=3 SV=1	1	2	2	2	17.2	17.2	17.2	13.412	122	122	0	16.845	8821500	5				97	274;953	True;True	296;998	487;488;1715	928;929;930;931;3211	928;3211
sp|Q9HWE8|RS14_PSEAE	sp|Q9HWE8|RS14_PSEAE	2	2	2	>sp|Q9HWE8|RS14_PSEAE 30S ribosomal protein S14 OS=Pseudomonas aeruginosa (strain ATCC 15692 / PAO1 / 1C / PRS 101 / LMG 12228) GN=rpsN PE=3 SV=1	1	2	2	2	21.8	21.8	21.8	11.565	101	101	0	15.92	17346000	8				98	65;948	True;True	73;993	124;125;1707	290;291;292;293;294;295;296;3198	293;3198
sp|Q9HWE9|RS8_PSEAE	sp|Q9HWE9|RS8_PSEAE	3	3	3	>sp|Q9HWE9|RS8_PSEAE 30S ribosomal protein S8 OS=Pseudomonas aeruginosa (strain ATCC 15692 / PAO1 / 1C / PRS 101 / LMG 12228) GN=rpsH PE=3 SV=1	1	3	3	3	28.5	28.5	28.5	14.17	130	130	0	20.466	9358100	8				99	320;755;962	True;True;True	343;797;1007	558;1352;1732;1733	1044;2499;3255;3256;3257;3258;3259;3260	1044;2499;3259
sp|Q9HWF1|RL18_PSEAE	sp|Q9HWF1|RL18_PSEAE	2	2	2	>sp|Q9HWF1|RL18_PSEAE 50S ribosomal protein L18 OS=Pseudomonas aeruginosa (strain ATCC 15692 / PAO1 / 1C / PRS 101 / LMG 12228) GN=rplR PE=3 SV=1	1	2	2	2	18.1	18.1	18.1	12.661	116	116	0	11.84	2042900	3				100	1;882	True;True	1;925	1;1596	1;3012;3013	1;3012
sp|Q9HWF2|RS5_PSEAE	sp|Q9HWF2|RS5_PSEAE	4	4	4	>sp|Q9HWF2|RS5_PSEAE 30S ribosomal protein S5 OS=Pseudomonas aeruginosa (strain ATCC 15692 / PAO1 / 1C / PRS 101 / LMG 12228) GN=rpsE PE=3 SV=1	1	4	4	4	34.9	34.9	34.9	17.625	166	166	0	42.75	21568000	10				101	142;399;653;941	True;True;True;True	157;426;692;986	267;268;701;702;1182;1183;1694;1695	562;563;1305;1306;2222;2223;3178;3179;3180;3181	562;1306;2222;3181
sp|Q9HWF7|RS13_PSEAE	sp|Q9HWF7|RS13_PSEAE	1	1	1	>sp|Q9HWF7|RS13_PSEAE 30S ribosomal protein S13 OS=Pseudomonas aeruginosa (strain ATCC 15692 / PAO1 / 1C / PRS 101 / LMG 12228) GN=rpsM PE=3 SV=1	1	1	1	1	8.5	8.5	8.5	13.265	118	118	0	6.2957	0	1				102	379	TRUE	405	670	1248	1248
sp|Q9HXV4|KAD_PSEAE	sp|Q9HXV4|KAD_PSEAE	3	3	3	>sp|Q9HXV4|KAD_PSEAE Adenylate kinase OS=Pseudomonas aeruginosa (strain ATCC 15692 / PAO1 / 1C / PRS 101 / LMG 12228) GN=adk PE=3 SV=1	1	3	3	3	20.9	20.9	20.9	23.107	215	215	0	16.693	3737200	1				103	313;351;578	True;True;True	336;376;609	547;548;616;1036	1028;1029;1163;1925	1028;1163;1925
sp|Q9HXZ4|PYRG_PSEAE	sp|Q9HXZ4|PYRG_PSEAE	2	2	2	>sp|Q9HXZ4|PYRG_PSEAE CTP synthase OS=Pseudomonas aeruginosa (strain ATCC 15692 / PAO1 / 1C / PRS 101 / LMG 12228) GN=pyrG PE=3 SV=1	1	2	2	2	4.4	4.4	4.4	59.617	542	542	0	11.223	1039300	2				104	789;831	True;True	832;874	1427;1499	2685;2820	2685;2820
sp|Q9HXZ5|ENO_PSEAE	sp|Q9HXZ5|ENO_PSEAE	5	5	5	>sp|Q9HXZ5|ENO_PSEAE Enolase OS=Pseudomonas aeruginosa (strain ATCC 15692 / PAO1 / 1C / PRS 101 / LMG 12228) GN=eno PE=3 SV=1	1	5	5	5	17.2	17.2	17.2	45.195	429	429	0	36.653	8829700	5				105	74;140;290;854;912	True;True;True;True;True	82;155;312;897;955	140;265;516;1551;1645	315;560;983;2923;3105	315;560;983;2923;3105
sp|Q9HYR9|CLPP2_PSEAE	sp|Q9HYR9|CLPP2_PSEAE	1	1	1	>sp|Q9HYR9|CLPP2_PSEAE ATP-dependent Clp protease proteolytic subunit 2 OS=Pseudomonas aeruginosa (strain ATCC 15692 / PAO1 / 1C / PRS 101 / LMG 12228) GN=clpP2 PE=3 SV=1	1	1	1	1	6	6	6	22.142	201	201	0	6.7454	926040	1				106	398	TRUE	425	700	1304	1304
sp|Q9HZ71|RS1_PSEAE	sp|Q9HZ71|RS1_PSEAE	12	12	12	>sp|Q9HZ71|RS1_PSEAE 30S ribosomal protein S1 OS=Pseudomonas aeruginosa (strain ATCC 15692 / PAO1 / 1C / PRS 101 / LMG 12228) GN=rpsA PE=3 SV=1	1	12	12	12	32.4	32.4	32.4	61.869	559	559	0	107.95	84012000	28				107	43;216;303;317;419;468;691;721;725;757;774;858	True;True;True;True;True;True;True;True;True;True;True;True	47;235;326;340;448;498;732;763;767;799;817;901	81;82;83;393;394;535;536;554;742;833;1253;1254;1299;1304;1305;1354;1397;1398;1556;1557	175;176;177;178;179;779;780;1010;1011;1012;1013;1036;1394;1395;1554;2348;2349;2350;2351;2423;2429;2430;2501;2605;2606;2607;2608;2609;2610;2936;2937	178;779;1011;1036;1395;1554;2348;2423;2429;2501;2608;2937
sp|Q9HZ76|WBPE_PSEAE	sp|Q9HZ76|WBPE_PSEAE	2	2	2	>sp|Q9HZ76|WBPE_PSEAE UDP-2-acetamido-2-deoxy-3-oxo-D-glucuronate aminotransferase OS=Pseudomonas aeruginosa (strain ATCC 15692 / PAO1 / 1C / PRS 101 / LMG 12228) GN=wbpE PE=1 SV=1	1	2	2	2	8.4	8.4	8.4	38.924	359	359	0	12.76	2764200	2				108	493;963	True;True	523;1008	873;1734	1619;3261	1619;3261
sp|Q9HZE0|DHE2_PSEAE	sp|Q9HZE0|DHE2_PSEAE	16	16	16	>sp|Q9HZE0|DHE2_PSEAE NAD-specific glutamate dehydrogenase OS=Pseudomonas aeruginosa (strain ATCC 15692 / PAO1 / 1C / PRS 101 / LMG 12228) GN=gdhB PE=1 SV=1	1	16	16	16	14.3	14.3	14.3	182.64	1620	1620	0	124.57	46234000	33				109	13;66;78;111;160;232;244;500;514;553;591;632;815;865;870;890	True;True;True;True;True;True;True;True;True;True;True;True;True;True;True;True	13;74;86;123;175;251;263;530;544;584;622;670;858;908;913;933	22;126;127;146;212;301;302;303;416;434;435;883;884;912;913;1001;1058;1059;1144;1471;1569;1577;1607	64;297;298;336;461;462;608;609;610;611;612;613;614;808;828;829;830;1633;1634;1635;1721;1722;1862;1970;1971;1972;1973;2156;2776;2965;2974;2975;3027	64;298;336;462;610;808;828;1633;1721;1862;1970;2156;2776;2965;2975;3027
sp|Q9HZZ2|EFP_PSEAE	sp|Q9HZZ2|EFP_PSEAE	3	3	3	>sp|Q9HZZ2|EFP_PSEAE Elongation factor P OS=Pseudomonas aeruginosa (strain ATCC 15692 / PAO1 / 1C / PRS 101 / LMG 12228) GN=efp PE=1 SV=1	1	3	3	3	19.7	19.7	19.7	20.985	188	188	0	23.738	7936600	3				110	12;648;876	True;True;True	12;687;919	20;21;1173;1585	62;63;2205;2986	63;2205;2986
sp|Q9I0J6|NUOG_PSEAE	sp|Q9I0J6|NUOG_PSEAE	2	2	2	>sp|Q9I0J6|NUOG_PSEAE NADH-quinone oxidoreductase subunit G OS=Pseudomonas aeruginosa (strain ATCC 15692 / PAO1 / 1C / PRS 101 / LMG 12228) GN=nuoG PE=3 SV=1	1	2	2	2	3.3	3.3	3.3	98.999	905	905	0	14.149	3037800	3				111	575;931	True;True	606;976	1031;1676;1677	1902;3156;3157	1902;3156
sp|Q9I0J9|NUOCD_PSEAE	sp|Q9I0J9|NUOCD_PSEAE	2	2	2	>sp|Q9I0J9|NUOCD_PSEAE NADH-quinone oxidoreductase subunit C/D OS=Pseudomonas aeruginosa (strain ATCC 15692 / PAO1 / 1C / PRS 101 / LMG 12228) GN=nuoC PE=3 SV=1	1	2	2	2	3.2	3.2	3.2	68.322	593	593	0	11.358	1079200	1				112	227;404	True;True	246;432	410;712	799;1329	799;1329
sp|Q9I0K4|ACEA_PSEAE	sp|Q9I0K4|ACEA_PSEAE	4	4	4	>sp|Q9I0K4|ACEA_PSEAE Isocitrate lyase OS=Pseudomonas aeruginosa (strain ATCC 15692 / PAO1 / 1C / PRS 101 / LMG 12228) GN=PA2634 PE=1 SV=1	1	4	4	4	9.8	9.8	9.8	58.886	531	531	0	37.184	11589000	9				113	245;550;785;922	True;True;True;True	264;581;828;967	436;437;996;1420;1421;1422;1663	831;832;833;1854;2677;2678;2679;2680;3134	833;1854;2680;3134
sp|Q9I1L9|DLDH1_PSEAE	sp|Q9I1L9|DLDH1_PSEAE	6	6	6	>sp|Q9I1L9|DLDH1_PSEAE Dihydrolipoyl dehydrogenase OS=Pseudomonas aeruginosa (strain ATCC 15692 / PAO1 / 1C / PRS 101 / LMG 12228) GN=lpdV PE=1 SV=1	1	6	6	6	18.1	18.1	18.1	48.588	464	464	0	37.12	13366000	7				114	85;97;672;713;770;875	True;True;True;True;True;True	93;108;713;754;813;918	154;185;1221;1286;1390;1583;1584	344;403;2277;2400;2590;2984;2985	344;403;2277;2400;2590;2985
sp|Q9I1M0|ODB2_PSEAE	sp|Q9I1M0|ODB2_PSEAE	1	1	1	>sp|Q9I1M0|ODB2_PSEAE Lipoamide acyltransferase component of branched-chain alpha-keto acid dehydrogenase complex OS=Pseudomonas aeruginosa (strain ATCC 15692 / PAO1 / 1C / PRS 101 / LMG 12228) GN=bkdB PE=1 SV=1	1	1	1	1	2.3	2.3	2.3	45.774	428	428	0.010363	5.9163	637730	1				115	954	TRUE	999	1716	3212	3212
sp|Q9I1M2|ODBA_PSEAE	sp|Q9I1M2|ODBA_PSEAE	1	1	1	>sp|Q9I1M2|ODBA_PSEAE 2-oxoisovalerate dehydrogenase subunit alpha OS=Pseudomonas aeruginosa (strain ATCC 15692 / PAO1 / 1C / PRS 101 / LMG 12228) GN=bkdA1 PE=3 SV=1	1	1	1	1	3.2	3.2	3.2	45.256	410	410	0.0052632	5.9639	724970	1				116	647	TRUE	686	1172	2204	2204
sp|Q9I291|GALU_PSEAE	sp|Q9I291|GALU_PSEAE	2	2	2	>sp|Q9I291|GALU_PSEAE UTP--glucose-1-phosphate uridylyltransferase OS=Pseudomonas aeruginosa (strain ATCC 15692 / PAO1 / 1C / PRS 101 / LMG 12228) GN=galU PE=3 SV=1	1	2	2	2	10	10	10	31.236	279	279	0	11.141	2089200	2				117	964;966	True;True	1009;1011	1735;1740	3262;3282	3262;3282
sp|Q9I2A8|ATOB_PSEAE	sp|Q9I2A8|ATOB_PSEAE	9	9	9	>sp|Q9I2A8|ATOB_PSEAE Acetyl-CoA acetyltransferase OS=Pseudomonas aeruginosa (strain ATCC 15692 / PAO1 / 1C / PRS 101 / LMG 12228) GN=atoB PE=3 SV=1	1	9	9	9	34.1	34.1	34.1	40.405	393	393	0	58.95	36996000	14				118	51;59;82;83;224;293;543;613;784	True;True;True;True;True;True;True;True;True	56;65;90;91;243;316;573;646;827	95;108;109;151;152;406;407;522;523;984;1095;1417;1418;1419	204;236;237;341;342;795;796;993;994;995;1827;1828;2038;2039;2673;2674;2675;2676	204;237;341;342;796;993;1827;2039;2674
sp|Q9I2P8|NFUA_PSEAE	sp|Q9I2P8|NFUA_PSEAE	1	1	1	>sp|Q9I2P8|NFUA_PSEAE Fe/S biogenesis protein NfuA OS=Pseudomonas aeruginosa (strain ATCC 15692 / PAO1 / 1C / PRS 101 / LMG 12228) GN=nfuA PE=3 SV=1	1	1	1	1	9.8	9.8	9.8	21.136	194	194	0.0096154	5.7068	444700	1				119	712	TRUE	753	1285	2399	2399
sp|Q9I2U0|CLPX_PSEAE	sp|Q9I2U0|CLPX_PSEAE	1	1	1	>sp|Q9I2U0|CLPX_PSEAE ATP-dependent Clp protease ATP-binding subunit ClpX OS=Pseudomonas aeruginosa (strain ATCC 15692 / PAO1 / 1C / PRS 101 / LMG 12228) GN=clpX PE=3 SV=1	1	1	1	1	5.4	5.4	5.4	46.991	426	426	0	6.9551	1574300	2				120	570	TRUE	601	1023;1024	1892;1893	1893
sp|Q9I2U2|TIG_PSEAE	sp|Q9I2U2|TIG_PSEAE	2	2	2	>sp|Q9I2U2|TIG_PSEAE Trigger factor OS=Pseudomonas aeruginosa (strain ATCC 15692 / PAO1 / 1C / PRS 101 / LMG 12228) GN=tig PE=3 SV=1	1	2	2	2	5.5	5.5	5.5	48.581	436	436	0	12.165	1275400	2				121	84;561	True;True	92;592	153;1012	343;1877	343;1877
sp|Q9I2V5|ACNB_PSEAE	sp|Q9I2V5|ACNB_PSEAE	18	18	18	>sp|Q9I2V5|ACNB_PSEAE Aconitate hydratase B OS=Pseudomonas aeruginosa (strain ATCC 15692 / PAO1 / 1C / PRS 101 / LMG 12228) GN=acnB PE=3 SV=1	1	18	18	18	32.2	32.2	32.2	93.627	869	869	0	130.89	86439000	51				122	0;5;32;49;166;179;315;323;438;509;564;569;607;617;775;801;821;914	True;True;True;True;True;True;True;True;True;True;True;True;True;True;True;True;True;True	0;5;35;54;181;195;338;346;468;539;595;600;639;651;652;818;844;864;957	0;5;6;7;59;60;92;93;310;311;331;551;552;564;565;772;899;900;901;902;1016;1017;1022;1084;1085;1101;1102;1399;1451;1480;1481;1647;1648	0;5;6;7;8;9;10;141;142;201;202;622;623;624;625;675;1033;1034;1051;1052;1469;1664;1665;1666;1667;1668;1669;1670;1671;1672;1673;1674;1675;1881;1882;1883;1884;1885;1891;2017;2018;2019;2045;2046;2047;2611;2750;2785;2786;3107;3108;3109	0;6;142;201;622;675;1033;1052;1469;1665;1881;1891;2017;2047;2611;2750;2785;3107	34	423
sp|Q9I2W7|RRAAH_PSEAE	sp|Q9I2W7|RRAAH_PSEAE	3	3	3	>sp|Q9I2W7|RRAAH_PSEAE Putative 4-hydroxy-4-methyl-2-oxoglutarate aldolase OS=Pseudomonas aeruginosa (strain ATCC 15692 / PAO1 / 1C / PRS 101 / LMG 12228) GN=PA1772 PE=1 SV=1	1	3	3	3	25.9	25.9	25.9	17.404	162	162	0	19.74	13652000	5				123	86;193;201	True;True;True	94;211;219	155;156;356;357;366	345;346;722;723;737	346;723;737
sp|Q9I3C5|HTPG_PSEAE	sp|Q9I3C5|HTPG_PSEAE	4	4	4	>sp|Q9I3C5|HTPG_PSEAE Chaperone protein HtpG OS=Pseudomonas aeruginosa (strain ATCC 15692 / PAO1 / 1C / PRS 101 / LMG 12228) GN=htpG PE=3 SV=1	1	4	4	4	8.5	8.5	8.5	71.667	634	634	0	26.958	9017900	7				124	52;275;456;886	True;True;True;True	57;297;486;929	96;489;490;807;1602	205;932;933;934;1511;1512;3022	205;934;1512;3022
sp|Q9I3D1|DLDH2_PSEAE	sp|Q9I3D1|DLDH2_PSEAE	10	10	10	>sp|Q9I3D1|DLDH2_PSEAE Dihydrolipoyl dehydrogenase OS=Pseudomonas aeruginosa (strain ATCC 15692 / PAO1 / 1C / PRS 101 / LMG 12228) GN=lpdG PE=3 SV=1	1	10	10	10	30.1	30.1	30.1	50.164	478	478	0	90.014	84655000	35				125	29;93;116;123;287;354;508;649;707;829	True;True;True;True;True;True;True;True;True;True	31;101;102;128;135;136;309;379;538;688;748;872	53;54;169;170;171;221;222;232;233;234;511;621;622;897;898;1174;1175;1274;1275;1495;1496	134;135;136;370;371;372;373;374;473;474;475;476;477;490;491;492;493;494;495;977;1174;1175;1662;1663;2206;2207;2208;2209;2381;2382;2383;2814;2815;2816;2817	134;373;473;493;977;1174;1663;2206;2381;2816	35;36	336;394
sp|Q9I3D2|ODO2_PSEAE	sp|Q9I3D2|ODO2_PSEAE	1	1	1	>sp|Q9I3D2|ODO2_PSEAE Dihydrolipoyllysine-residue succinyltransferase component of 2-oxoglutarate dehydrogenase complex OS=Pseudomonas aeruginosa (strain ATCC 15692 / PAO1 / 1C / PRS 101 / LMG 12228) GN=sucB PE=3 SV=1	1	1	1	1	4.4	4.4	4.4	42.887	409	409	0.0092166	5.646	3356500	1				126	110	TRUE	122	211	460	460
sp|Q9I3F5|ACNA_PSEAE	sp|Q9I3F5|ACNA_PSEAE	16	16	16	>sp|Q9I3F5|ACNA_PSEAE Aconitate hydratase A OS=Pseudomonas aeruginosa (strain ATCC 15692 / PAO1 / 1C / PRS 101 / LMG 12228) GN=acnA PE=3 SV=1	1	16	16	16	29	29	29	99.147	910	910	0	119.94	68789000	35				127	67;233;263;298;329;389;434;481;545;816;837;883;893;894;945;976	True;True;True;True;True;True;True;True;True;True;True;True;True;True;True;True	75;252;284;321;352;416;464;511;575;859;880;926;936;937;990;1021	128;129;417;418;466;529;530;578;579;686;765;766;856;857;987;1472;1473;1474;1506;1507;1597;1610;1611;1612;1702;1703;1755;1756	299;300;809;810;811;891;1001;1002;1003;1004;1005;1088;1089;1275;1441;1442;1595;1596;1831;2777;2778;2779;2828;2829;2830;2831;2832;2833;2834;3014;3030;3031;3032;3193;3194;3307;3308	299;811;891;1004;1088;1275;1441;1595;1831;2778;2833;3014;3030;3032;3194;3307
sp|Q9I4S5|PDXH_PSEAE	sp|Q9I4S5|PDXH_PSEAE	1	1	1	>sp|Q9I4S5|PDXH_PSEAE Pyridoxine/pyridoxamine 5-phosphate oxidase OS=Pseudomonas aeruginosa (strain ATCC 15692 / PAO1 / 1C / PRS 101 / LMG 12228) GN=pdxH PE=3 SV=1	1	1	1	1	7.9	7.9	7.9	24.86	215	215	0.010204	5.863	995130	1				128	167	TRUE	182	312	626	626
sp|Q9I4W3|DAPA_PSEAE	sp|Q9I4W3|DAPA_PSEAE	3	3	3	>sp|Q9I4W3|DAPA_PSEAE 4-hydroxy-tetrahydrodipicolinate synthase OS=Pseudomonas aeruginosa (strain ATCC 15692 / PAO1 / 1C / PRS 101 / LMG 12228) GN=dapA PE=1 SV=1	1	3	3	3	12.3	12.3	12.3	31.449	292	292	0	17.846	3405900	2				129	439;567;943	True;True;True	469;598;988	773;1020;1698	1470;1889;3188	1470;1889;3188
sp|Q9I4Z4|PAL_PSEAE	sp|Q9I4Z4|PAL_PSEAE	4	4	4	>sp|Q9I4Z4|PAL_PSEAE Peptidoglycan-associated lipoprotein OS=Pseudomonas aeruginosa (strain ATCC 15692 / PAO1 / 1C / PRS 101 / LMG 12228) GN=pal PE=3 SV=1	1	4	4	4	32.7	32.7	32.7	17.925	168	168	0	32.937	12905000	8				130	257;265;933;974	True;True;True;True	278;286;978;1019	456;471;1679;1752;1753	873;903;3159;3300;3301;3302;3303;3304;3305	873;903;3159;3300
sp|Q9I502|SYP_PSEAE	sp|Q9I502|SYP_PSEAE	1	1	1	>sp|Q9I502|SYP_PSEAE Proline--tRNA ligase OS=Pseudomonas aeruginosa (strain ATCC 15692 / PAO1 / 1C / PRS 101 / LMG 12228) GN=proS PE=3 SV=1	1	1	1	1	2.3	2.3	2.3	63.103	571	571	0.010471	5.9255	1032800	2				131	924	TRUE	969	1666;1667	3139;3140	3139
sp|Q9I558|ACSA1_PSEAE	sp|Q9I558|ACSA1_PSEAE	1	1	1	>sp|Q9I558|ACSA1_PSEAE Acetyl-coenzyme A synthetase 1 OS=Pseudomonas aeruginosa (strain ATCC 15692 / PAO1 / 1C / PRS 101 / LMG 12228) GN=acsA1 PE=3 SV=1	1	1	1	1	1.8	1.8	1.8	71.762	651	651	0.01005	5.821	712280	2				132	7	TRUE	7	12;13	42;43	42
sp|Q9I576|HPPD_PSEAE	sp|Q9I576|HPPD_PSEAE	3	3	3	>sp|Q9I576|HPPD_PSEAE 4-hydroxyphenylpyruvate dioxygenase OS=Pseudomonas aeruginosa (strain ATCC 15692 / PAO1 / 1C / PRS 101 / LMG 12228) GN=hpd PE=3 SV=1	1	3	3	3	10.9	10.9	10.9	39.912	357	357	0	32.557	10297000	8				133	79;630;836	True;True;True	87;668;879	147;1141;1142;1504;1505	337;2150;2151;2152;2153;2154;2826;2827	337;2150;2827
sp|Q9I589|CBPD_PSEAE	sp|Q9I589|CBPD_PSEAE	1	1	1	>sp|Q9I589|CBPD_PSEAE Chitin-binding protein CbpD OS=Pseudomonas aeruginosa (strain ATCC 15692 / PAO1 / 1C / PRS 101 / LMG 12228) GN=cbpD PE=1 SV=1	1	1	1	1	3.6	3.6	3.6	41.916	389	389	0	6.6378	1219900	1				134	117	TRUE	129	223	478	478
sp|Q9I5V8|RS21_PSEAE	sp|Q9I5V8|RS21_PSEAE	4	4	4	>sp|Q9I5V8|RS21_PSEAE 30S ribosomal protein S21 OS=Pseudomonas aeruginosa (strain ATCC 15692 / PAO1 / 1C / PRS 101 / LMG 12228) GN=rpsU PE=1 SV=3	1	4	4	4	45.1	45.1	45.1	8.4848	71	71	0	22.754	3315900	4				135	57;230;763;879	True;True;True;True	63;249;806;922	106;414;1376;1589	234;806;2542;2997	234;806;2542;2997
sp|Q9I5Y1|ALF_PSEAE	sp|Q9I5Y1|ALF_PSEAE	5	5	5	>sp|Q9I5Y1|ALF_PSEAE Fructose-bisphosphate aldolase OS=Pseudomonas aeruginosa (strain ATCC 15692 / PAO1 / 1C / PRS 101 / LMG 12228) GN=fba PE=3 SV=1	1	5	5	5	16.1	16.1	16.1	38.573	354	354	0	29.537	6892200	8				136	281;296;474;817;957	True;True;True;True;True	303;319;504;860;1002	499;500;527;844;1475;1724	948;949;950;951;999;1568;2780;3237	950;999;1568;2780;3237
sp|Q9I5Y4|PGK_PSEAE	sp|Q9I5Y4|PGK_PSEAE	1	1	1	>sp|Q9I5Y4|PGK_PSEAE Phosphoglycerate kinase OS=Pseudomonas aeruginosa (strain ATCC 15692 / PAO1 / 1C / PRS 101 / LMG 12228) GN=pgk PE=3 SV=1	1	1	1	1	4.4	4.4	4.4	40.404	387	387	0	7.4792	1309500	1				137	835	TRUE	878	1503	2825	2825
sp|Q9I5Z0|METK_PSEAE	sp|Q9I5Z0|METK_PSEAE	5	5	5	>sp|Q9I5Z0|METK_PSEAE S-adenosylmethionine synthase OS=Pseudomonas aeruginosa (strain ATCC 15692 / PAO1 / 1C / PRS 101 / LMG 12228) GN=metK PE=3 SV=1	1	5	5	5	20.5	20.5	20.5	42.709	396	396	0	33.719	21560000	8				138	376;604;641;735;799	True;True;True;True;True	402;636;680;777;842	665;666;1079;1080;1159;1160;1322;1448	1242;1243;2010;2011;2175;2176;2448;2744	1242;2010;2175;2448;2744
sp|Q9I617|BIOF_PSEAE	sp|Q9I617|BIOF_PSEAE	1	1	1	>sp|Q9I617|BIOF_PSEAE 8-amino-7-oxononanoate synthase OS=Pseudomonas aeruginosa (strain ATCC 15692 / PAO1 / 1C / PRS 101 / LMG 12228) GN=bioF PE=3 SV=1	1	1	1	1	5	5	5	42.237	401	401	0	7.9864	3247800	0				139	121	TRUE	133	229;230	487;488	488
sp|Q9I685|SAHH_PSEAE	sp|Q9I685|SAHH_PSEAE	11	11	11	>sp|Q9I685|SAHH_PSEAE Adenosylhomocysteinase OS=Pseudomonas aeruginosa (strain ATCC 15692 / PAO1 / 1C / PRS 101 / LMG 12228) GN=ahcY PE=3 SV=1	1	11	11	11	33	33	33	51.399	469	469	0	71.904	47797000	19				140	164;168;311;411;430;464;588;706;716;905;951	True;True;True;True;True;True;True;True;True;True;True	179;183;334;439;459;460;494;619;747;757;948;996	308;313;545;721;722;756;757;758;819;820;1053;1054;1273;1291;1633;1711;1712	619;627;628;629;1026;1341;1342;1427;1428;1429;1430;1529;1530;1962;1963;2380;2406;3083;3084;3205;3206;3207	619;628;1026;1341;1427;1530;1963;2380;2406;3084;3205	37	387
sp|Q9I6M4|DAVT_PSEAE	sp|Q9I6M4|DAVT_PSEAE	7	7	7	>sp|Q9I6M4|DAVT_PSEAE 5-aminovalerate aminotransferase DavT OS=Pseudomonas aeruginosa (strain ATCC 15692 / PAO1 / 1C / PRS 101 / LMG 12228) GN=davT PE=1 SV=1	1	7	7	7	21.6	21.6	21.6	45.22	426	426	0	48.812	27084000	13				141	34;56;286;350;773;810;871	True;True;True;True;True;True;True	37;62;308;375;816;853;914	63;105;509;510;614;615;1395;1396;1461;1578	145;146;233;974;975;976;1160;1161;1162;2602;2603;2604;2764;2976	145;233;976;1161;2603;2764;2976
sp|Q9I6M5|DAVD_PSEAE	sp|Q9I6M5|DAVD_PSEAE	5	5	5	>sp|Q9I6M5|DAVD_PSEAE Glutarate-semialdehyde dehydrogenase DavD OS=Pseudomonas aeruginosa (strain ATCC 15692 / PAO1 / 1C / PRS 101 / LMG 12228) GN=davD PE=1 SV=1	1	5	5	5	17.6	17.6	17.6	51.622	483	483	0	40.254	13778000	5				142	455;555;849;901;935	True;True;True;True;True	485;586;892;944;980	805;806;1004;1538;1539;1623;1624;1681	1509;1510;1867;2905;2906;3046;3047;3161	1510;1867;2905;3047;3161
sp|Q9I747|HCP1_PSEAE	sp|Q9I747|HCP1_PSEAE	3	3	3	>sp|Q9I747|HCP1_PSEAE Protein hcp1 OS=Pseudomonas aeruginosa (strain ATCC 15692 / PAO1 / 1C / PRS 101 / LMG 12228) GN=hcp1 PE=1 SV=1	1	3	3	3	25.9	25.9	25.9	17.414	162	162	0	19.567	11824000	6				143	50;262;904	True;True;True	55;283;947	94;464;465;1631;1632	203;889;890;3080;3081;3082	203;890;3080
sp|Q9I7B8|SYGB_PSEAE	sp|Q9I7B8|SYGB_PSEAE	1	1	1	>sp|Q9I7B8|SYGB_PSEAE Glycine--tRNA ligase beta subunit OS=Pseudomonas aeruginosa (strain ATCC 15692 / PAO1 / 1C / PRS 101 / LMG 12228) GN=glyS PE=3 SV=1	1	1	1	1	2.2	2.2	2.2	73.973	684	684	0	6.8225	518120	1				144	87	TRUE	95	157	347	347
sp|Q9S508|PHZB2_PSEAE	sp|Q9S508|PHZB2_PSEAE	4	4	2	>sp|Q9S508|PHZB2_PSEAE Phenazine biosynthesis protein PhzB 2 OS=Pseudomonas aeruginosa (strain ATCC 15692 / PAO1 / 1C / PRS 101 / LMG 12228) GN=phzB2 PE=1 SV=1	1	4	4	2	38.3	38.3	25.9	19.027	162	162	0	30.892	39190000	15				145	91;229;423;605	True;True;True;True	99;248;452;637	165;166;412;413;748;1081;1082	363;364;365;366;367;801;802;803;804;805;1407;2012;2013;2014;2015	364;803;1407;2012
sp|Q9X2T1|THIO_PSEAE	sp|Q9X2T1|THIO_PSEAE	1	1	1	>sp|Q9X2T1|THIO_PSEAE Thioredoxin OS=Pseudomonas aeruginosa (strain ATCC 15692 / PAO1 / 1C / PRS 101 / LMG 12228) GN=trxA PE=3 SV=1	1	1	1	1	11.1	11.1	11.1	11.87	108	108	0	6.9395	4388400	4				146	554	TRUE	585	1002;1003	1863;1864;1865;1866	1865
sp|Q9X4G0|HGD_PSEAE	sp|Q9X4G0|HGD_PSEAE	2	2	2	>sp|Q9X4G0|HGD_PSEAE Homogentisate 1,2-dioxygenase OS=Pseudomonas aeruginosa (strain ATCC 15692 / PAO1 / 1C / PRS 101 / LMG 12228) GN=hmgA PE=3 SV=2	1	2	2	2	6.5	6.5	6.5	47.841	432	432	0	12.125	2478200	2				147	357;560	True;True	382;591	628;1011	1183;1876	1183;1876
tr|G3XCZ9|G3XCZ9_PSEAE	tr|G3XCZ9|G3XCZ9_PSEAE	1	1	1	>tr|G3XCZ9|G3XCZ9_PSEAE Poly(3-hydroxyalkanoic acid) synthase 2 OS=Pseudomonas aeruginosa (strain ATCC 15692 / PAO1 / 1C / PRS 101 / LMG 12228) GN=phaC2 PE=4 SV=1	1	1	1	1	2.5	2.5	2.5	62.738	560	560	0.0093897	5.6543	953930	1				148	558	TRUE	589	1008	1871	1871
tr|Q9HTD1|Q9HTD1_PSEAE	tr|Q9HTD1|Q9HTD1_PSEAE	29	29	29	>tr|Q9HTD1|Q9HTD1_PSEAE Probable transcarboxylase subunit OS=Pseudomonas aeruginosa (strain ATCC 15692 / PAO1 / 1C / PRS 101 / LMG 12228) GN=PA5435 PE=4 SV=1	1	29	29	29	63.8	63.8	63.8	66.095	607	607	0	303.9	921020000	260				149	9;18;94;105;106;156;183;215;284;338;343;344;364;365;374;388;400;462;472;599;681;719;720;722;800;845;902;915;965	True;True;True;True;True;True;True;True;True;True;True;True;True;True;True;True;True;True;True;True;True;True;True;True;True;True;True;True;True	9;18;103;104;117;118;171;199;200;234;306;362;368;369;389;390;391;400;414;415;427;428;492;502;630;631;722;760;761;762;764;843;888;945;958;959;1010	16;17;28;29;172;173;174;175;176;177;202;203;204;205;289;290;291;292;293;294;295;296;337;338;339;340;390;391;392;504;505;506;507;592;593;601;602;603;604;605;641;642;643;644;645;646;661;662;663;682;683;684;685;703;704;705;706;815;816;841;842;1071;1072;1073;1074;1236;1237;1238;1239;1294;1295;1296;1297;1298;1300;1449;1450;1519;1520;1521;1522;1523;1524;1525;1526;1527;1528;1529;1530;1531;1532;1625;1626…	53;54;55;56;57;58;59;70;71;72;73;74;75;76;77;78;79;375;376;377;378;379;380;381;382;383;384;385;386;387;388;439;440;441;442;443;444;445;446;447;593;594;595;596;597;598;599;600;689;690;691;692;693;694;695;696;697;698;699;774;775;776;777;778;964;965;966;967;968;969;970;971;972;1113;1114;1115;1116;1117;1118;1119;1120;1121;1122;1135;1136;1137;1138;1139;1140;1141;1142;1143;1144;1145;1146;1147;1202;1203…	57;71;382;440;447;597;697;777;965;1113;1136;1139;1207;1216;1239;1263;1311;1520;1563;1994;2311;2411;2422;2424;2745;2886;3050;3115;3266	38;39;40;41;42;43;44;45;46	125;169;172;182;239;306;323;435;544
tr|Q9HTD9|Q9HTD9_PSEAE	tr|Q9HTD9|Q9HTD9_PSEAE	6	6	6	>tr|Q9HTD9|Q9HTD9_PSEAE Alcohol dehydrogenase OS=Pseudomonas aeruginosa (strain ATCC 15692 / PAO1 / 1C / PRS 101 / LMG 12228) GN=adhA PE=1 SV=1	1	6	6	6	24	24	24	35.911	342	342	0	44.019	17895000	10				150	10;19;95;392;489;683	True;True;True;True;True;True	10;19;105;419;519;724	18;30;178;179;691;867;1241	60;80;81;389;390;1288;1289;1610;1611;2321;2322	60;81;389;1288;1610;2321
tr|Q9HTP2|Q9HTP2_PSEAE	tr|Q9HTP2|Q9HTP2_PSEAE	10	10	10	>tr|Q9HTP2|Q9HTP2_PSEAE Probable aldehyde dehydrogenase OS=Pseudomonas aeruginosa (strain ATCC 15692 / PAO1 / 1C / PRS 101 / LMG 12228) GN=PA5312 PE=3 SV=1	1	10	10	10	41.4	41.4	41.4	53.143	497	497	0	70.661	35391000	17				151	222;269;288;349;356;382;383;454;521;759	True;True;True;True;True;True;True;True;True;True	241;291;310;374;381;408;409;484;551;802	403;404;480;512;513;613;627;674;675;803;804;922;923;1370	791;792;793;915;978;979;980;1159;1182;1253;1254;1506;1507;1508;1736;1737;2533	791;915;978;1159;1182;1253;1254;1506;1736;2533
tr|Q9HTR4|Q9HTR4_PSEAE	tr|Q9HTR4|Q9HTR4_PSEAE	1	1	1	>tr|Q9HTR4|Q9HTR4_PSEAE Uncharacterized protein OS=Pseudomonas aeruginosa (strain ATCC 15692 / PAO1 / 1C / PRS 101 / LMG 12228) GN=PA5290 PE=4 SV=1	1	1	1	1	1.8	1.8	1.8	53.082	497	497	0.0097561	5.7497	1325900	1				152	387	TRUE	413	681	1261	1261
tr|Q9HTU9|Q9HTU9_PSEAE	tr|Q9HTU9|Q9HTU9_PSEAE	2	2	2	>tr|Q9HTU9|Q9HTU9_PSEAE Uncharacterized protein OS=Pseudomonas aeruginosa (strain ATCC 15692 / PAO1 / 1C / PRS 101 / LMG 12228) GN=PA5245 PE=4 SV=1	1	2	2	2	8.1	8.1	8.1	23.425	222	222	0	11.183	1837000	2				153	670;887	True;True	711;930	1218;1603	2274;3023	2274;3023
tr|Q9HU11|Q9HU11_PSEAE	tr|Q9HU11|Q9HU11_PSEAE	5	5	5	>tr|Q9HU11|Q9HU11_PSEAE Uncharacterized protein OS=Pseudomonas aeruginosa (strain ATCC 15692 / PAO1 / 1C / PRS 101 / LMG 12228) GN=PA5178 PE=4 SV=1	1	5	5	5	46.9	46.9	46.9	15.46	145	145	0	39.667	17764000	11				154	38;425;447;864;872	True;True;True;True;True	42;454;477;907;915	71;72;750;791;792;1568;1579;1580	161;162;1410;1493;1494;1495;2964;2977;2978;2979;2980	162;1410;1493;2964;2977
tr|Q9HU24|Q9HU24_PSEAE	tr|Q9HU24|Q9HU24_PSEAE	1	1	1	>tr|Q9HU24|Q9HU24_PSEAE dTDP-glucose 4,6-dehydratase OS=Pseudomonas aeruginosa (strain ATCC 15692 / PAO1 / 1C / PRS 101 / LMG 12228) GN=rmlB PE=3 SV=1	1	1	1	1	2.3	2.3	2.3	39.542	352	352	0.0094787	5.6917	56652	1				155	535	TRUE	565	972	1809	1809
tr|Q9HUC3|Q9HUC3_PSEAE	tr|Q9HUC3|Q9HUC3_PSEAE	3	3	3	>tr|Q9HUC3|Q9HUC3_PSEAE Polyhydroxyalkanoate synthesis protein PhaF OS=Pseudomonas aeruginosa (strain ATCC 15692 / PAO1 / 1C / PRS 101 / LMG 12228) GN=phaF PE=4 SV=1	1	3	3	3	9.4	9.4	9.4	30.577	309	309	0	17.2	3945700	3				156	503;717;949	True;True;True	533;758;994	889;1292;1708	1647;2407;3199	1647;2407;3199
tr|Q9HUD3|Q9HUD3_PSEAE	tr|Q9HUD3|Q9HUD3_PSEAE	6	6	6	>tr|Q9HUD3|Q9HUD3_PSEAE Malic enzyme OS=Pseudomonas aeruginosa (strain ATCC 15692 / PAO1 / 1C / PRS 101 / LMG 12228) GN=PA5046 PE=4 SV=1	1	6	6	6	26.8	26.8	26.8	45.428	422	422	0	37.13	13405000	7				157	3;335;530;718;778;804	True;True;True;True;True;True	3;358;560;759;821;847	3;586;964;1293;1404;1455	3;1101;1799;2408;2409;2626;2754	3;1101;1799;2408;2626;2754
tr|Q9HV54|Q9HV54_PSEAE	tr|Q9HV54|Q9HV54_PSEAE	1	1	1	>tr|Q9HV54|Q9HV54_PSEAE Transcription termination/antitermination protein NusA OS=Pseudomonas aeruginosa (strain ATCC 15692 / PAO1 / 1C / PRS 101 / LMG 12228) GN=nusA PE=3 SV=1	1	1	1	1	3.7	3.7	3.7	54.658	493	493	0	6.3144	1262300	2				158	397	TRUE	424	698;699	1302;1303	1303
tr|Q9HVA0|Q9HVA0_PSEAE	tr|Q9HVA0|Q9HVA0_PSEAE	1	1	1	>tr|Q9HVA0|Q9HVA0_PSEAE Acetolactate synthase OS=Pseudomonas aeruginosa (strain ATCC 15692 / PAO1 / 1C / PRS 101 / LMG 12228) GN=ilvI PE=3 SV=1	1	1	1	1	3.7	3.7	3.7	63.018	574	574	0.0095238	5.6956	293940	1				159	16	TRUE	16	25	67	67
tr|Q9HVF9|Q9HVF9_PSEAE	tr|Q9HVF9|Q9HVF9_PSEAE	3	3	3	>tr|Q9HVF9|Q9HVF9_PSEAE Uncharacterized protein OS=Pseudomonas aeruginosa (strain ATCC 15692 / PAO1 / 1C / PRS 101 / LMG 12228) GN=PA4632 PE=3 SV=1	1	3	3	3	19	19	19	29.159	273	273	0	18.553	4854400	4				160	126;580;711	True;True;True	139;611;752	238;1039;1283;1284	499;1930;2397;2398	499;1930;2397
tr|Q9HVJ1|Q9HVJ1_PSEAE	tr|Q9HVJ1|Q9HVJ1_PSEAE	6	6	6	>tr|Q9HVJ1|Q9HVJ1_PSEAE Probable ATP-binding component of ABC transporter OS=Pseudomonas aeruginosa (strain ATCC 15692 / PAO1 / 1C / PRS 101 / LMG 12228) GN=PA4595 PE=4 SV=1	1	6	6	6	15	15	15	61.32	554	554	0	38.012	8783000	5				161	75;172;276;301;495;891	True;True;True;True;True;True	83;187;298;324;525;934	141;318;491;533;875;1608	316;643;935;1008;1621;1622;3028	316;643;935;1008;1622;3028
tr|Q9HVY4|Q9HVY4_PSEAE	tr|Q9HVY4|Q9HVY4_PSEAE	1	1	1	>tr|Q9HVY4|Q9HVY4_PSEAE Ubiquinol-cytochrome c reductase iron-sulfur subunit OS=Pseudomonas aeruginosa (strain ATCC 15692 / PAO1 / 1C / PRS 101 / LMG 12228) GN=PA4431 PE=4 SV=1	1	1	1	1	5.6	5.6	5.6	20.828	197	197	0	6.4062	1993000	2				162	124	TRUE	137	235;236	496;497	496
tr|Q9HW32|Q9HW32_PSEAE	tr|Q9HW32|Q9HW32_PSEAE	4	4	4	>tr|Q9HW32|Q9HW32_PSEAE Insulin-cleaving metalloproteinase outer membrane protein OS=Pseudomonas aeruginosa (strain ATCC 15692 / PAO1 / 1C / PRS 101 / LMG 12228) GN=icmP PE=4 SV=1	1	4	4	4	15	15	15	47.23	446	446	0	22.634	2668900	4				163	62;147;458;822	True;True;True;True	69;162;488;865	116;275;809;1482	251;572;1514;2787;2788	251;572;1514;2788
tr|Q9HW49|Q9HW49_PSEAE	tr|Q9HW49|Q9HW49_PSEAE	8	8	8	>tr|Q9HW49|Q9HW49_PSEAE Uncharacterized protein OS=Pseudomonas aeruginosa (strain ATCC 15692 / PAO1 / 1C / PRS 101 / LMG 12228) GN=PA4352 PE=3 SV=1	1	8	8	8	44.4	44.4	44.4	30.972	286	286	0	58.684	40927000	35				164	145;211;428;480;850;859;861;892	True;True;True;True;True;True;True;True	160;230;457;510;893;902;904;935	272;273;385;753;854;855;1540;1541;1542;1543;1558;1559;1560;1561;1563;1564;1609	569;570;769;1414;1593;1594;2907;2908;2909;2910;2911;2912;2938;2939;2940;2941;2942;2943;2944;2945;2946;2947;2948;2949;2950;2951;2952;2953;2954;2955;2956;2958;2959;2960;3029	570;769;1414;1593;2909;2939;2958;3029	47	158
tr|Q9HW86|Q9HW86_PSEAE	tr|Q9HW86|Q9HW86_PSEAE	1	1	1	>tr|Q9HW86|Q9HW86_PSEAE MvaT OS=Pseudomonas aeruginosa (strain ATCC 15692 / PAO1 / 1C / PRS 101 / LMG 12228) GN=mvaT PE=1 SV=1	1	1	1	1	8.9	8.9	8.9	14.18	124	124	0.0090909	5.6235	292680	2				165	660	TRUE	701	1197;1198	2244;2245	2244
tr|Q9HWG9|Q9HWG9_PSEAE	tr|Q9HWG9|Q9HWG9_PSEAE	1	1	1	>tr|Q9HWG9|Q9HWG9_PSEAE Flavin-containing monooxygenase OS=Pseudomonas aeruginosa (strain ATCC 15692 / PAO1 / 1C / PRS 101 / LMG 12228) GN=phzS PE=1 SV=1	1	1	1	1	2.2	2.2	2.2	43.644	402	402	0.010152	5.8366	0	1				166	623	TRUE	661	1123	2089	2089
tr|Q9HWK5|Q9HWK5_PSEAE	tr|Q9HWK5|Q9HWK5_PSEAE	2	2	2	>tr|Q9HWK5|Q9HWK5_PSEAE Peptidylprolyl isomerase OS=Pseudomonas aeruginosa (strain ATCC 15692 / PAO1 / 1C / PRS 101 / LMG 12228) GN=ppiC2 PE=4 SV=1	1	2	2	2	35.5	35.5	35.5	9.963	93	93	0	13.305	11477000	2				167	225;780	True;True	244;823	408;1411	797;2666	797;2666
tr|Q9HWV0|Q9HWV0_PSEAE	tr|Q9HWV0|Q9HWV0_PSEAE	3	3	3	>tr|Q9HWV0|Q9HWV0_PSEAE Probable nonribosomal peptide synthetase OS=Pseudomonas aeruginosa (strain ATCC 15692 / PAO1 / 1C / PRS 101 / LMG 12228) GN=PA4078 PE=4 SV=1	1	3	3	3	4.8	4.8	4.8	110.35	991	991	0	18.144	4491700	4				168	47;235;851	True;True;True	52;254;894	89;420;421;1544	187;813;814;2913	187;814;2913
tr|Q9I2C4|Q9I2C4_PSEAE;tr|Q9HX05|Q9HX05_PSEAE	tr|Q9I2C4|Q9I2C4_PSEAE;tr|Q9HX05|Q9HX05_PSEAE	3;3	3;3	3;3	>tr|Q9I2C4|Q9I2C4_PSEAE NAD+ dependent aldehyde dehydrogenase ExaC OS=Pseudomonas aeruginosa (strain ATCC 15692 / PAO1 / 1C / PRS 101 / LMG 12228) GN=exaC PE=3 SV=1;>tr|Q9HX05|Q9HX05_PSEAE Probable aldehyde dehydrogenase OS=Pseudomonas aeruginosa (strain A	2	3	3	3	9.9	9.9	9.9	54.892	506	506;506	0	18.21	6088900	2				169	377;396;497	True;True;True	403;423;527	667;697;878	1244;1301;1625	1244;1301;1625
tr|Q9HX12|Q9HX12_PSEAE	tr|Q9HX12|Q9HX12_PSEAE	1	1	1	>tr|Q9HX12|Q9HX12_PSEAE Uncharacterized protein OS=Pseudomonas aeruginosa (strain ATCC 15692 / PAO1 / 1C / PRS 101 / LMG 12228) GN=PA4015 PE=4 SV=1	1	1	1	1	8.6	8.6	8.6	16.7	151	151	0.010101	5.8257	1115100	1				170	548	TRUE	578	991	1835	1835
tr|Q9HXA5|Q9HXA5_PSEAE	tr|Q9HXA5|Q9HXA5_PSEAE	1	1	1	>tr|Q9HXA5|Q9HXA5_PSEAE Uncharacterized protein OS=Pseudomonas aeruginosa (strain ATCC 15692 / PAO1 / 1C / PRS 101 / LMG 12228) GN=PA3908 PE=4 SV=1	1	1	1	1	6.3	6.3	6.3	27.294	239	239	0.0097087	5.7279	3861900	1				171	541	TRUE	571	981	1823	1823
tr|Q9HXJ2|Q9HXJ2_PSEAE	tr|Q9HXJ2|Q9HXJ2_PSEAE	1	1	1	>tr|Q9HXJ2|Q9HXJ2_PSEAE Type 4 fimbrial biogenesis protein PilF OS=Pseudomonas aeruginosa (strain ATCC 15692 / PAO1 / 1C / PRS 101 / LMG 12228) GN=pilF PE=1 SV=1	1	1	1	1	4.4	4.4	4.4	28.537	252	252	0	6.2517	1591300	1				172	197	TRUE	215	362	733	733
tr|Q9HXM5|Q9HXM5_PSEAE	tr|Q9HXM5|Q9HXM5_PSEAE	1	1	1	>tr|Q9HXM5|Q9HXM5_PSEAE Inosine-5-monophosphate dehydrogenase OS=Pseudomonas aeruginosa (strain ATCC 15692 / PAO1 / 1C / PRS 101 / LMG 12228) GN=guaB PE=1 SV=1	1	1	1	1	2.9	2.9	2.9	51.707	489	489	0.0091743	5.6424	509080	2				173	856	TRUE	899	1554	2933;2934	2934
tr|Q9HXR8|Q9HXR8_PSEAE	tr|Q9HXR8|Q9HXR8_PSEAE	5	5	5	>tr|Q9HXR8|Q9HXR8_PSEAE Probable FMN oxidoreductase OS=Pseudomonas aeruginosa (strain ATCC 15692 / PAO1 / 1C / PRS 101 / LMG 12228) GN=PA3723 PE=4 SV=1	1	5	5	5	21.5	21.5	21.5	40.318	368	368	0	28.084	9880800	3				174	214;247;277;749;798	True;True;True;True;True	233;267;299;791;841	389;440;492;1344;1446;1447	773;837;936;2486;2742;2743	773;837;936;2486;2743
tr|Q9HXU8|Q9HXU8_PSEAE	tr|Q9HXU8|Q9HXU8_PSEAE	1	1	1	>tr|Q9HXU8|Q9HXU8_PSEAE Lipotoxon F, LptF OS=Pseudomonas aeruginosa (strain ATCC 15692 / PAO1 / 1C / PRS 101 / LMG 12228) GN=lptF PE=3 SV=1	1	1	1	1	5	5	5	28.514	261	261	0	7.9926	554320	1				175	624	TRUE	662	1124	2090	2090
tr|Q9HY12|Q9HY12_PSEAE	tr|Q9HY12|Q9HY12_PSEAE	2	2	2	>tr|Q9HY12|Q9HY12_PSEAE Uncharacterized protein OS=Pseudomonas aeruginosa (strain ATCC 15692 / PAO1 / 1C / PRS 101 / LMG 12228) GN=PA3614 PE=4 SV=1	1	2	2	2	9.9	9.9	9.9	51.921	467	467	0	11.521	5604100	3				176	104;196	True;True	116;214	200;201;361	437;438;732	437;732
tr|Q9HY13|Q9HY13_PSEAE	tr|Q9HY13|Q9HY13_PSEAE	3	3	3	>tr|Q9HY13|Q9HY13_PSEAE Uncharacterized protein OS=Pseudomonas aeruginosa (strain ATCC 15692 / PAO1 / 1C / PRS 101 / LMG 12228) GN=PA3613 PE=4 SV=1	1	3	3	3	5.6	5.6	5.6	88.378	801	801	0	19.085	7647600	5				177	783;866;889	True;True;True	826;909;932	1415;1416;1570;1571;1606	2671;2672;2966;2967;3026	2672;2967;3026
tr|Q9HY77|Q9HY77_PSEAE	tr|Q9HY77|Q9HY77_PSEAE	2	2	2	>tr|Q9HY77|Q9HY77_PSEAE Glutaredoxin OS=Pseudomonas aeruginosa (strain ATCC 15692 / PAO1 / 1C / PRS 101 / LMG 12228) GN=PA3533 PE=3 SV=1	1	2	2	2	19.4	19.4	19.4	11.843	108	108	0	14.992	12706000	5				178	273;595	True;True	295;626	485;486;1065	924;925;926;927;1983	924;1983
tr|Q9HY81|Q9HY81_PSEAE	tr|Q9HY81|Q9HY81_PSEAE	7	7	7	>tr|Q9HY81|Q9HY81_PSEAE Probable peroxidase OS=Pseudomonas aeruginosa (strain ATCC 15692 / PAO1 / 1C / PRS 101 / LMG 12228) GN=PA3529 PE=1 SV=1	1	7	7	7	38	38	38	21.822	200	200	0	47.771	48283000	16				179	152;332;436;652;668;760;977	True;True;True;True;True;True;True	167;355;466;691;709;803;1022	283;284;583;770;1180;1181;1215;1371;1372;1757	583;584;585;586;1097;1467;2219;2220;2221;2271;2534;2535;2536;2537;2538;3309	584;1097;1467;2220;2271;2537;3309
tr|Q9HYJ0|Q9HYJ0_PSEAE	tr|Q9HYJ0|Q9HYJ0_PSEAE	1	1	1	>tr|Q9HYJ0|Q9HYJ0_PSEAE Probable dihydrolipoamide acetyltransferase OS=Pseudomonas aeruginosa (strain ATCC 15692 / PAO1 / 1C / PRS 101 / LMG 12228) GN=PA3415 PE=3 SV=1	1	1	1	1	3	3	3	39.52	370	370	0.0053191	6.0044	255880	2				180	24	TRUE	26	44;45	121;122	121
tr|Q9HYT5|Q9HYT5_PSEAE	tr|Q9HYT5|Q9HYT5_PSEAE	7	7	7	>tr|Q9HYT5|Q9HYT5_PSEAE Uncharacterized protein OS=Pseudomonas aeruginosa (strain ATCC 15692 / PAO1 / 1C / PRS 101 / LMG 12228) GN=PA3309 PE=3 SV=1	1	7	7	7	61.6	61.6	61.6	16.496	151	151	0	70.253	214210000	58				181	368;395;429;549;841;846;877	True;True;True;True;True;True;True	394;422;458;579;580;884;889;920	650;651;652;653;695;696;754;755;992;993;994;995;1513;1533;1586;1587	1220;1221;1222;1223;1224;1225;1226;1227;1228;1295;1296;1297;1298;1299;1300;1415;1416;1417;1418;1419;1420;1421;1422;1423;1424;1425;1426;1836;1837;1838;1839;1840;1841;1842;1843;1844;1845;1846;1847;1848;1849;1850;1851;1852;1853;2845;2846;2847;2848;2899;2987;2988;2989;2990;2991;2992;2993;2994	1224;1299;1416;1848;2847;2899;2990	48	129
tr|Q9HYZ6|Q9HYZ6_PSEAE	tr|Q9HYZ6|Q9HYZ6_PSEAE	1	1	1	>tr|Q9HYZ6|Q9HYZ6_PSEAE Site-determining protein OS=Pseudomonas aeruginosa (strain ATCC 15692 / PAO1 / 1C / PRS 101 / LMG 12228) GN=minD PE=3 SV=1	1	1	1	1	5.2	5.2	5.2	29.635	271	271	0.0092593	5.6464	752200	0				182	832	TRUE	875	1500	2821	2821
tr|Q9HZK4|Q9HZK4_PSEAE	tr|Q9HZK4|Q9HZK4_PSEAE	8	8	8	>tr|Q9HZK4|Q9HZK4_PSEAE Glyceraldehyde-3-phosphate dehydrogenase OS=Pseudomonas aeruginosa (strain ATCC 15692 / PAO1 / 1C / PRS 101 / LMG 12228) GN=PA3001 PE=3 SV=1	1	8	8	8	22.8	22.8	22.8	50.111	461	461	0	55.426	17348000	11				183	31;223;507;642;658;714;898;908	True;True;True;True;True;True;True;True	34;242;537;681;699;755;941;951	58;405;896;1161;1194;1287;1288;1618;1638;1639	140;794;1661;2177;2239;2401;2402;3038;3089;3090;3091	140;794;1661;2177;2239;2401;3038;3090
tr|Q9I028|Q9I028_PSEAE	tr|Q9I028|Q9I028_PSEAE	5	5	5	>tr|Q9I028|Q9I028_PSEAE Probable acyl-CoA dehydrogenase OS=Pseudomonas aeruginosa (strain ATCC 15692 / PAO1 / 1C / PRS 101 / LMG 12228) GN=PA2815 PE=4 SV=1	1	5	5	5	13.1	13.1	13.1	88.762	815	815	0	32.43	11879000	8				184	188;256;426;913;967	True;True;True;True;True	205;277;455;956;1012	349;455;751;1646;1741;1742	711;712;872;1411;3106;3283;3284;3285;3286	712;872;1411;3106;3283
tr|Q9I0L4|Q9I0L4_PSEAE	tr|Q9I0L4|Q9I0L4_PSEAE	4	4	4	>tr|Q9I0L4|Q9I0L4_PSEAE Isocitrate dehydrogenase OS=Pseudomonas aeruginosa (strain ATCC 15692 / PAO1 / 1C / PRS 101 / LMG 12228) GN=idh PE=4 SV=1	1	4	4	4	7.3	7.3	7.3	81.633	741	741	0	27.095	7396500	7				185	144;209;487;932	True;True;True;True	159;227;517;977	271;379;380;865;1678	568;760;761;762;763;1608;3158	568;761;1608;3158
tr|Q9I0L5|Q9I0L5_PSEAE;REV__tr|Q9HWT9|Q9HWT9_PSEAE	tr|Q9I0L5|Q9I0L5_PSEAE	14;1	14;1	14;1	>tr|Q9I0L5|Q9I0L5_PSEAE Isocitrate dehydrogenase [NADP] OS=Pseudomonas aeruginosa (strain ATCC 15692 / PAO1 / 1C / PRS 101 / LMG 12228) GN=icd PE=3 SV=1	2	14	14	14	40.4	40.4	40.4	45.577	418	418;253	0	137.04	97118000	43				186	90;134;163;208;254;336;370;385;440;459;467;661;752;903	True;True;True;True;True;True;True;True;True;True;True;True;True;True	98;147;178;226;275;359;396;411;470;489;497;702;794;946	163;164;252;253;307;377;378;452;587;588;656;657;678;774;810;811;812;831;832;1199;1200;1201;1348;1627;1628;1629;1630	359;360;361;362;521;522;523;524;525;618;757;758;759;865;1102;1103;1104;1105;1106;1107;1232;1233;1258;1471;1515;1516;1517;1552;1553;2246;2247;2248;2249;2495;3067;3068;3069;3070;3071;3072;3073;3074;3075;3076;3077;3078;3079	359;521;618;758;865;1104;1233;1258;1471;1516;1552;2246;2495;3068
tr|Q9I0T1|Q9I0T1_PSEAE	tr|Q9I0T1|Q9I0T1_PSEAE	7	7	7	>tr|Q9I0T1|Q9I0T1_PSEAE Probable acyl-CoA thiolase OS=Pseudomonas aeruginosa (strain ATCC 15692 / PAO1 / 1C / PRS 101 / LMG 12228) GN=PA2553 PE=3 SV=1	1	7	7	7	22.5	22.5	22.5	41.4	396	396	0	46.029	19610000	8				187	174;206;219;324;584;820;825	True;True;True;True;True;True;True	189;224;238;347;615;863;868	321;373;374;398;399;566;1046;1478;1479;1488	650;753;754;786;787;1053;1945;2783;2784;2800	650;753;787;1053;1945;2784;2800
tr|Q9I0T2|Q9I0T2_PSEAE	tr|Q9I0T2|Q9I0T2_PSEAE	1	1	1	>tr|Q9I0T2|Q9I0T2_PSEAE Probable acyl-CoA dehydrogenase OS=Pseudomonas aeruginosa (strain ATCC 15692 / PAO1 / 1C / PRS 101 / LMG 12228) GN=PA2552 PE=3 SV=1	1	1	1	1	2.7	2.7	2.7	40.908	375	375	0.0053763	6.0419	1033100	1				188	381	TRUE	407	673	1252	1252
tr|Q9I0Z9|Q9I0Z9_PSEAE	tr|Q9I0Z9|Q9I0Z9_PSEAE	3	3	3	>tr|Q9I0Z9|Q9I0Z9_PSEAE Uncharacterized protein OS=Pseudomonas aeruginosa (strain ATCC 15692 / PAO1 / 1C / PRS 101 / LMG 12228) GN=PA2483 PE=4 SV=1	1	3	3	3	17.1	17.1	17.1	36.102	333	333	0	17.415	4593000	3				189	761;796;971	True;True;True	804;839;1016	1373;1444;1748	2539;2740;3294	2539;2740;3294
tr|Q9I1E7|Q9I1E7_PSEAE	tr|Q9I1E7|Q9I1E7_PSEAE	3	3	3	>tr|Q9I1E7|Q9I1E7_PSEAE Alkyl hydroperoxide reductase AhpD OS=Pseudomonas aeruginosa (strain ATCC 15692 / PAO1 / 1C / PRS 101 / LMG 12228) GN=PA2331 PE=3 SV=1	1	3	3	3	17.7	17.7	17.7	19.904	186	186	0	20.618	3720000	3				190	305;563;819	True;True;True	328;594;862	538;1015;1477	1015;1880;2782	1015;1880;2782
tr|Q9I1E8|Q9I1E8_PSEAE	tr|Q9I1E8|Q9I1E8_PSEAE	2	2	2	>tr|Q9I1E8|Q9I1E8_PSEAE Uncharacterized protein OS=Pseudomonas aeruginosa (strain ATCC 15692 / PAO1 / 1C / PRS 101 / LMG 12228) GN=PA2330 PE=4 SV=1	1	2	2	2	9.9	9.9	9.9	37.68	355	355	0	15.898	4625900	3				191	406;515	True;True	434;545	715;914;915	1332;1723;1724	1332;1723
tr|Q9I1N7|Q9I1N7_PSEAE	tr|Q9I1N7|Q9I1N7_PSEAE	1	1	1	>tr|Q9I1N7|Q9I1N7_PSEAE PslB OS=Pseudomonas aeruginosa (strain ATCC 15692 / PAO1 / 1C / PRS 101 / LMG 12228) GN=pslB PE=3 SV=1	1	1	1	1	2.7	2.7	2.7	53.515	488	488	0	6.6861	893860	2				192	251	TRUE	271	445;446	843;844	844
tr|Q9I1Y4|Q9I1Y4_PSEAE	tr|Q9I1Y4|Q9I1Y4_PSEAE	1	1	1	>tr|Q9I1Y4|Q9I1Y4_PSEAE Fimbrial subunit CupA4 OS=Pseudomonas aeruginosa (strain ATCC 15692 / PAO1 / 1C / PRS 101 / LMG 12228) GN=cupA4 PE=4 SV=1	1	1	1	1	2.2	2.2	2.2	47.449	453	453	0.01	5.819	2619000	1				193	847	TRUE	890	1534	2900	2900
tr|Q9I246|Q9I246_PSEAE	tr|Q9I246|Q9I246_PSEAE	9	9	9	>tr|Q9I246|Q9I246_PSEAE Probable carbamoyl transferase OS=Pseudomonas aeruginosa (strain ATCC 15692 / PAO1 / 1C / PRS 101 / LMG 12228) GN=PA2069 PE=4 SV=1	1	9	9	9	19.9	19.9	19.9	63.382	574	574	0	66.4	27858000	21				194	14;165;291;307;371;444;675;736;738	True;True;True;True;True;True;True;True;True	14;180;313;330;397;474;716;778;780	23;309;517;518;541;658;784;1225;1226;1323;1324;1327;1328	65;620;621;984;985;986;987;1020;1234;1235;1483;2281;2282;2283;2284;2285;2286;2287;2449;2450;2457;2458;2459	65;621;985;1020;1234;1483;2285;2450;2457
tr|Q9I297|Q9I297_PSEAE	tr|Q9I297|Q9I297_PSEAE	1	1	1	>tr|Q9I297|Q9I297_PSEAE Methylcrotonyl-CoA carboxylase, beta-subunit OS=Pseudomonas aeruginosa (strain ATCC 15692 / PAO1 / 1C / PRS 101 / LMG 12228) GN=liuB PE=1 SV=1	1	1	1	1	2.2	2.2	2.2	57.433	535	535	0	6.3378	393680	1				195	53	TRUE	58	97	206	206
tr|Q9I299|Q9I299_PSEAE	tr|Q9I299|Q9I299_PSEAE	8	8	8	>tr|Q9I299|Q9I299_PSEAE Methylcrotonyl-CoA carboxylase, alpha-subunit (Biotin-containing) OS=Pseudomonas aeruginosa (strain ATCC 15692 / PAO1 / 1C / PRS 101 / LMG 12228) GN=liuD PE=1 SV=1	1	8	8	8	17.6	17.6	17.6	71.282	655	655	0	57.308	26235000	11				196	81;213;231;410;424;536;589;927	True;True;True;True;True;True;True;True	89;232;250;438;453;566;620;972	150;387;388;415;720;749;973;1055;1670;1671	340;771;772;807;1340;1408;1409;1810;1964;3144;3145	340;771;807;1340;1409;1810;1964;3144
tr|Q9I2A2|Q9I2A2_PSEAE	tr|Q9I2A2|Q9I2A2_PSEAE	2	2	2	>tr|Q9I2A2|Q9I2A2_PSEAE Fumarylacetoacetase OS=Pseudomonas aeruginosa (strain ATCC 15692 / PAO1 / 1C / PRS 101 / LMG 12228) GN=fahA PE=4 SV=1	1	2	2	2	4.6	4.6	4.6	46.341	432	432	0	11.013	597340	2				197	373;696	True;True	399;737	660;1259	1237;2357	1237;2357
tr|Q9I2A6|Q9I2A6_PSEAE	tr|Q9I2A6|Q9I2A6_PSEAE	1	1	1	>tr|Q9I2A6|Q9I2A6_PSEAE 3-hydroxybutyrate dehydrogenase OS=Pseudomonas aeruginosa (strain ATCC 15692 / PAO1 / 1C / PRS 101 / LMG 12228) GN=bdhA PE=3 SV=1	1	1	1	1	6.2	6.2	6.2	26.727	256	256	0	6.139	5227100	2				198	451	TRUE	481	798;799	1501;1502	1501
tr|Q9I2A9|Q9I2A9_PSEAE	tr|Q9I2A9|Q9I2A9_PSEAE	2	2	2	>tr|Q9I2A9|Q9I2A9_PSEAE DhcB, dehydrocarnitine CoA transferase, subunit B OS=Pseudomonas aeruginosa (strain ATCC 15692 / PAO1 / 1C / PRS 101 / LMG 12228) GN=dhcB PE=4 SV=1	1	2	2	2	16.5	16.5	16.5	23.187	218	218	0	13.742	8058600	8				199	330;532	True;True	353;562	580;581;966;967	1090;1091;1092;1093;1094;1095;1801;1802	1091;1801
tr|Q9I2U9|Q9I2U9_PSEAE	tr|Q9I2U9|Q9I2U9_PSEAE	4	4	4	>tr|Q9I2U9|Q9I2U9_PSEAE Peptidyl-prolyl cis-trans isomerase OS=Pseudomonas aeruginosa (strain ATCC 15692 / PAO1 / 1C / PRS 101 / LMG 12228) GN=ppiB PE=3 SV=1	1	4	4	4	32.7	32.7	32.7	18.126	165	165	0	25.478	5321100	5				200	107;490;523;734	True;True;True;True	119;520;553;776	206;868;926;927;1321	448;1612;1613;1741;1742;2447	448;1612;1742;2447
tr|Q9I2V3|Q9I2V3_PSEAE	tr|Q9I2V3|Q9I2V3_PSEAE	4	4	4	>tr|Q9I2V3|Q9I2V3_PSEAE Uncharacterized protein OS=Pseudomonas aeruginosa (strain ATCC 15692 / PAO1 / 1C / PRS 101 / LMG 12228) GN=PA1789 PE=1 SV=1	1	4	4	4	20.6	20.6	20.6	31.273	287	287	0	24.536	11624000	6				201	221;420;488;745	True;True;True;True	240;449;518;787	402;743;744;866;1338	790;1396;1397;1398;1399;1609;2478	790;1396;1609;2478
tr|Q9I2W9|Q9I2W9_PSEAE	tr|Q9I2W9|Q9I2W9_PSEAE	4	4	4	>tr|Q9I2W9|Q9I2W9_PSEAE Phosphoenolpyruvate synthase OS=Pseudomonas aeruginosa (strain ATCC 15692 / PAO1 / 1C / PRS 101 / LMG 12228) GN=ppsA PE=3 SV=1	1	4	4	4	7.3	7.3	7.3	85.816	791	791	0	30.061	9004400	5				202	40;271;756;808	True;True;True;True	44;293;798;851	75;76;483;1353;1459	166;167;922;2500;2758	167;922;2500;2758
tr|Q9I2Z1|Q9I2Z1_PSEAE	tr|Q9I2Z1|Q9I2Z1_PSEAE	1	1	1	>tr|Q9I2Z1|Q9I2Z1_PSEAE Uncharacterized protein OS=Pseudomonas aeruginosa (strain ATCC 15692 / PAO1 / 1C / PRS 101 / LMG 12228) GN=PA1746 PE=4 SV=1	1	1	1	1	6.5	6.5	6.5	18.189	168	168	0	6.1722	8166300	2				203	128	TRUE	141	240;241	502;503	503
tr|Q9I3B2|Q9I3B2_PSEAE	tr|Q9I3B2|Q9I3B2_PSEAE	2	2	2	>tr|Q9I3B2|Q9I3B2_PSEAE Beta-ketoacyl-ACP synthase I OS=Pseudomonas aeruginosa (strain ATCC 15692 / PAO1 / 1C / PRS 101 / LMG 12228) GN=fabB PE=3 SV=1	1	2	2	2	5.9	5.9	5.9	42.806	405	405	0	15.095	6777600	5				204	194;289	True;True	212;311	358;514;515	724;725;726;981;982	725;982
tr|Q9I3D3|Q9I3D3_PSEAE	tr|Q9I3D3|Q9I3D3_PSEAE	7	7	7	>tr|Q9I3D3|Q9I3D3_PSEAE 2-oxoglutarate dehydrogenase (E1 subunit) OS=Pseudomonas aeruginosa (strain ATCC 15692 / PAO1 / 1C / PRS 101 / LMG 12228) GN=sucA PE=4 SV=1	1	7	7	7	9.8	9.8	9.8	105.88	943	943	0	43.611	21939000	11				205	162;450;557;559;606;703;765	True;True;True;True;True;True;True	177;480;588;590;638;744;808	306;797;1006;1007;1009;1010;1083;1268;1378;1379	617;1500;1869;1870;1872;1873;1874;1875;2016;2375;2544;2545	617;1500;1869;1875;2016;2375;2544
tr|Q9I3D4|Q9I3D4_PSEAE	tr|Q9I3D4|Q9I3D4_PSEAE	4	4	4	>tr|Q9I3D4|Q9I3D4_PSEAE Succinate dehydrogenase (B subunit) OS=Pseudomonas aeruginosa (strain ATCC 15692 / PAO1 / 1C / PRS 101 / LMG 12228) GN=sdhB PE=4 SV=1	1	4	4	4	20.9	20.9	20.9	26.155	235	235	0	30.334	21278000	11				206	205;283;486;586	True;True;True;True	223;305;516;617	371;372;503;863;864;1050;1051	751;752;962;963;1604;1605;1606;1607;1958;1959;1960	751;963;1604;1958
tr|Q9I3D5|Q9I3D5_PSEAE	tr|Q9I3D5|Q9I3D5_PSEAE	12	12	12	>tr|Q9I3D5|Q9I3D5_PSEAE Succinate dehydrogenase flavoprotein subunit OS=Pseudomonas aeruginosa (strain ATCC 15692 / PAO1 / 1C / PRS 101 / LMG 12228) GN=sdhA PE=3 SV=1	1	12	12	12	26.8	26.8	26.8	63.531	590	590	0	101.02	57089000	29				207	149;302;309;325;390;391;453;491;516;636;797;827	True;True;True;True;True;True;True;True;True;True;True;True	164;325;332;348;417;418;483;521;546;674;840;870	278;279;534;543;567;568;687;688;689;690;802;869;870;916;917;1150;1445;1491;1492	577;578;1009;1024;1054;1055;1056;1276;1277;1278;1279;1280;1281;1282;1283;1284;1285;1286;1287;1505;1614;1615;1616;1725;1726;1727;1728;1729;2165;2741;2807;2808	577;1009;1024;1054;1282;1286;1505;1614;1726;2165;2741;2807
tr|Q9I3G1|Q9I3G1_PSEAE	tr|Q9I3G1|Q9I3G1_PSEAE	1	1	1	>tr|Q9I3G1|Q9I3G1_PSEAE Cytochrome c oxidase, cbb3-type, CcoO subunit OS=Pseudomonas aeruginosa (strain ATCC 15692 / PAO1 / 1C / PRS 101 / LMG 12228) GN=ccoO2 PE=4 SV=1	1	1	1	1	8.9	8.9	8.9	22.778	202	202	0.0093458	5.6505	549720	1				208	791	TRUE	834	1430;1431	2689;2690	2689
tr|Q9I400|Q9I400_PSEAE	tr|Q9I400|Q9I400_PSEAE	1	1	1	>tr|Q9I400|Q9I400_PSEAE Probable short-chain dehydrogenase OS=Pseudomonas aeruginosa (strain ATCC 15692 / PAO1 / 1C / PRS 101 / LMG 12228) GN=PA1344 PE=4 SV=1	1	1	1	1	5.3	5.3	5.3	27.397	264	264	0.0053476	6.0381	763480	0				209	15	TRUE	15	24	66	66
tr|Q9I402|Q9I402_PSEAE	tr|Q9I402|Q9I402_PSEAE	1	1	1	>tr|Q9I402|Q9I402_PSEAE Probable binding protein component of ABC transporter OS=Pseudomonas aeruginosa (strain ATCC 15692 / PAO1 / 1C / PRS 101 / LMG 12228) GN=PA1342 PE=4 SV=1	1	1	1	1	4	4	4	33.054	302	302	0	6.5229	1096900	2				210	671	TRUE	712	1219;1220	2275;2276	2275
tr|Q9I4I1|Q9I4I1_PSEAE	tr|Q9I4I1|Q9I4I1_PSEAE	2	2	2	>tr|Q9I4I1|Q9I4I1_PSEAE Ribonucleoside-diphosphate reductase OS=Pseudomonas aeruginosa (strain ATCC 15692 / PAO1 / 1C / PRS 101 / LMG 12228) GN=nrdA PE=3 SV=1	1	2	2	2	3.1	3.1	3.1	107.11	963	963	0	12.271	854440	2				211	625;934	True;True	663;979	1125;1680	2091;3160	2091;3160
tr|Q9I4X1|Q9I4X1_PSEAE	tr|Q9I4X1|Q9I4X1_PSEAE	1	1	1	>tr|Q9I4X1|Q9I4X1_PSEAE PqsC OS=Pseudomonas aeruginosa (strain ATCC 15692 / PAO1 / 1C / PRS 101 / LMG 12228) GN=pqsC PE=1 SV=1	1	1	1	1	3.4	3.4	3.4	38.238	348	348	0	6.0857	2317400	2				212	562	TRUE	593	1013;1014	1878;1879	1878
tr|Q9I5E3|Q9I5E3_PSEAE	tr|Q9I5E3|Q9I5E3_PSEAE	2	2	2	>tr|Q9I5E3|Q9I5E3_PSEAE Citrate synthase OS=Pseudomonas aeruginosa (strain ATCC 15692 / PAO1 / 1C / PRS 101 / LMG 12228) GN=prpC PE=3 SV=1	1	2	2	2	8.8	8.8	8.8	41.689	375	375	0	15.776	5992600	4				213	416;795	True;True	444;838	732;733;1443	1355;1356;2738;2739	1356;2739
tr|Q9I5I4|Q9I5I4_PSEAE	tr|Q9I5I4|Q9I5I4_PSEAE	2	2	2	>tr|Q9I5I4|Q9I5I4_PSEAE Probable enoyl-CoA hydratase/isomerase OS=Pseudomonas aeruginosa (strain ATCC 15692 / PAO1 / 1C / PRS 101 / LMG 12228) GN=PA0745 PE=3 SV=1	1	2	2	2	7	7	7	29.904	272	272	0	10.998	2310500	1				214	297;843	True;True	320;886	528;1517	1000;2883	1000;2883
tr|Q9I5U9|Q9I5U9_PSEAE	tr|Q9I5U9|Q9I5U9_PSEAE	17	17	17	>tr|Q9I5U9|Q9I5U9_PSEAE Uncharacterized protein OS=Pseudomonas aeruginosa (strain ATCC 15692 / PAO1 / 1C / PRS 101 / LMG 12228) GN=PA0588 PE=4 SV=1	1	17	17	17	33.4	33.4	33.4	73.722	640	640	0	142.68	105380000	43				215	99;191;241;394;533;544;546;552;592;596;608;635;656;662;739;792;940	True;True;True;True;True;True;True;True;True;True;True;True;True;True;True;True;True	110;111;208;209;260;421;563;574;576;583;623;627;640;673;696;703;781;835;985	190;191;192;353;354;430;694;968;969;970;985;986;988;989;999;1000;1060;1061;1066;1067;1086;1148;1149;1189;1190;1202;1203;1329;1432;1433;1690;1691;1692;1693	426;427;428;718;719;720;824;1293;1294;1803;1804;1805;1829;1830;1832;1833;1859;1860;1861;1974;1975;1976;1984;1985;2020;2162;2163;2164;2231;2232;2250;2251;2252;2460;2691;2692;2693;2694;2695;3174;3175;3176;3177	426;720;824;1293;1803;1830;1832;1859;1974;1985;2020;2164;2231;2251;2460;2695;3176	49;50	255;412
tr|Q9I5Y8|Q9I5Y8_PSEAE	tr|Q9I5Y8|Q9I5Y8_PSEAE	2	2	2	>tr|Q9I5Y8|Q9I5Y8_PSEAE Transketolase OS=Pseudomonas aeruginosa (strain ATCC 15692 / PAO1 / 1C / PRS 101 / LMG 12228) GN=tktA PE=1 SV=1	1	2	2	2	4.5	4.5	4.5	72.219	665	665	0	15.355	9292100	5				216	268;380	True;True	290;406	478;479;671;672	913;914;1249;1250;1251	914;1250
tr|Q9I659|Q9I659_PSEAE	tr|Q9I659|Q9I659_PSEAE	3	1	1	>tr|Q9I659|Q9I659_PSEAE Probable ClpA/B protease ATP binding subunit OS=Pseudomonas aeruginosa (strain ATCC 15692 / PAO1 / 1C / PRS 101 / LMG 12228) GN=PA0459 PE=4 SV=1	1	3	1	1	4.2	1.5	1.5	94.174	850	850	0.0091324	5.6309	716970	1				217	629;659;781	True;False;False	667;700;824	1140;1195;1196;1412	2149;2240;2241;2242;2243;2667	2149;2241;2667
tr|Q9I671|Q9I671_PSEAE	tr|Q9I671|Q9I671_PSEAE	8	8	8	>tr|Q9I671|Q9I671_PSEAE Glutaryl-CoA dehydrogenase OS=Pseudomonas aeruginosa (strain ATCC 15692 / PAO1 / 1C / PRS 101 / LMG 12228) GN=gcdH PE=3 SV=1	1	8	8	8	33.8	33.8	33.8	43.311	393	393	0	70.307	41603000	22				218	125;185;192;355;369;619;677;754	True;True;True;True;True;True;True;True	138;202;210;380;395;656;718;796	237;342;343;355;623;624;625;626;654;655;1113;1114;1229;1230;1350;1351	498;701;702;703;704;721;1176;1177;1178;1179;1180;1181;1229;1230;1231;2073;2074;2075;2291;2292;2497;2498	498;701;721;1177;1231;2073;2291;2498
tr|Q9I6A0|Q9I6A0_PSEAE	tr|Q9I6A0|Q9I6A0_PSEAE	1	1	1	>tr|Q9I6A0|Q9I6A0_PSEAE Probable cystathionine gamma-lyase OS=Pseudomonas aeruginosa (strain ATCC 15692 / PAO1 / 1C / PRS 101 / LMG 12228) GN=PA0400 PE=3 SV=1	1	1	1	1	5.3	5.3	5.3	42.786	394	394	0	10.328	2052600	5				219	577	TRUE	608	1034;1035	1920;1921;1922;1923;1924	1920
tr|Q9I6H5|Q9I6H5_PSEAE	tr|Q9I6H5|Q9I6H5_PSEAE	2	2	2	>tr|Q9I6H5|Q9I6H5_PSEAE D-3-phosphoglycerate dehydrogenase OS=Pseudomonas aeruginosa (strain ATCC 15692 / PAO1 / 1C / PRS 101 / LMG 12228) GN=serA PE=3 SV=1	1	2	2	2	7.6	7.6	7.6	44.216	409	409	0	14.396	3329500	8				220	285;769	True;True	307;812	508;1386;1387;1388;1389	973;2583;2584;2585;2586;2587;2588;2589	973;2584
tr|Q9I6Z3|Q9I6Z3_PSEAE	tr|Q9I6Z3|Q9I6Z3_PSEAE	8	8	8	>tr|Q9I6Z3|Q9I6Z3_PSEAE Alkyl hydroperoxide reductase subunit C OS=Pseudomonas aeruginosa (strain ATCC 15692 / PAO1 / 1C / PRS 101 / LMG 12228) GN=ahpC PE=4 SV=1	1	8	8	8	60.4	60.4	60.4	20.541	187	187	0	66.173	127360000	32				221	44;115;278;342;746;805;833;937	True;True;True;True;True;True;True;True	48;127;300;367;788;848;876;982	84;217;218;219;220;493;494;599;600;1339;1340;1456;1501;1683;1684;1685;1686	180;467;468;469;470;471;472;937;938;939;940;941;942;943;1131;1132;1133;1134;2479;2480;2481;2482;2755;2822;3163;3164;3165;3166;3167;3168;3169;3170	180;467;938;1132;2480;2755;2822;3163

## Sheet: 2-1 Sheet1
Protein IDs-C4HSL (full)
sp|O52759|RS4_PSEAE
sp|O54439|ACP1_PSEAE
sp|P05384|DBHB_PSEAE
sp|P08308|OTCC_PSEAE
sp|P09591|EFTU_PSEAE
sp|P11221|OPRI_PSEAE
sp|P13794|PORF_PSEAE
sp|P13981|ARCA_PSEAE
sp|P30718|CH60_PSEAE
sp|P37799|BCCP_PSEAE
sp|P53593|SUCC_PSEAE
sp|P53641|SODF_PSEAE
sp|Q51567|SUCD_PSEAE
sp|Q59638|ODP2_PSEAE
sp|Q9HT18|ATPA_PSEAE
sp|Q9HTN8|RL28_PSEAE
sp|Q9HV43|DNAK_PSEAE
sp|Q9HWC9|RPOC_PSEAE
sp|Q9HWD2|EFG1_PSEAE;sp|Q9I244|EFG2_PSEAE
sp|Q9HWD8|RL2_PSEAE
sp|Q9HWE2|RL16_PSEAE
sp|Q9HZ71|RS1_PSEAE
sp|Q9I2V5|ACNB_PSEAE
sp|Q9I3D1|DLDH2_PSEAE
sp|Q9I3F5|ACNA_PSEAE
sp|Q9I576|HPPD_PSEAE
sp|Q9I617|BIOF_PSEAE
sp|Q9I685|SAHH_PSEAE
sp|Q9I6M4|DAVT_PSEAE
sp|Q9X2T1|THIO_PSEAE
tr|Q9HTD0|Q9HTD0_PSEAE
tr|Q9HTD1|Q9HTD1_PSEAE
tr|Q9HTP2|Q9HTP2_PSEAE
tr|Q9HW49|Q9HW49_PSEAE
tr|Q9HXA5|Q9HXA5_PSEAE
tr|Q9HY81|Q9HY81_PSEAE
tr|Q9HYT5|Q9HYT5_PSEAE
tr|Q9I0L5|Q9I0L5_PSEAE
tr|Q9I246|Q9I246_PSEAE
tr|Q9I299|Q9I299_PSEAE
tr|Q9I2J2|Q9I2J2_PSEAE
tr|Q9I2R5|Q9I2R5_PSEAE
tr|Q9I3D3|Q9I3D3_PSEAE
tr|Q9I3D5|Q9I3D5_PSEAE
tr|Q9I5U9|Q9I5U9_PSEAE
tr|Q9I657|Q9I657_PSEAE
tr|Q9I6Z3|Q9I6Z3_PSEAE
Probe 12 (subtracted)
REV__tr|Q9HX93|Q9HX93_PSEAE
REV__tr|Q9HXW2|Q9HXW2_PSEAE
sp|G3XD23|WBPB_PSEAE
sp|G3XD61|WBPI_PSEAE
sp|G3XD94|UGND_PSEAE
sp|O52760|RPOA_PSEAE
sp|O52762|CATA_PSEAE
sp|O68822|AMPA_PSEAE
sp|O69753|PHZB1_PSEAE
sp|O69754|PHZF_PSEAE
sp|O82850|RS2_PSEAE
sp|O82851|EFTS_PSEAE
sp|O86428|ILVE_PSEAE
sp|P04739|FMPO_PSEAE
sp|P11436|AMIE_PSEAE
sp|P13982|ARCC_PSEAE
sp|P14165|CISY_PSEAE
sp|P15276|ALGP_PSEAE
sp|P28810|MMSA_PSEAE
sp|P30720|CH10_PSEAE
sp|P37798|ACCC_PSEAE
sp|P38100|CARB_PSEAE
sp|P43336|PHHC_PSEAE
sp|P47204|FTSZ_PSEAE
sp|P47205|LPXC_PSEAE
sp|P48247|GSA_PSEAE
sp|P57668|TPX_PSEAE
sp|P72173|AAT_PSEAE
sp|P80358|ASTG_PSEAE
sp|Q51422|SYDND_PSEAE
sp|Q51561|RPOB_PSEAE
sp|Q59636|NDK_PSEAE
sp|Q59637|ODP1_PSEAE
sp|Q9HT14|ATP6_PSEAE
sp|Q9HT16|ATPF_PSEAE
sp|Q9HT19|ATPG_PSEAE
sp|Q9HT20|ATPB_PSEAE
sp|Q9HT21|ATPE_PSEAE
sp|Q9HT95|ATSE4_PSEAE
sp|Q9HTD7|ASPA_PSEAE
sp|Q9HU65|GLNA_PSEAE
sp|Q9HU73|F16PA_PSEAE
sp|Q9HUC5|HSLU_PSEAE
sp|Q9HUC8|SYR_PSEAE
sp|Q9HUM6|PURA_PSEAE
sp|Q9HUM9|RS6_PSEAE
sp|Q9HUN0|RS18_PSEAE
sp|Q9HV59|PNP_PSEAE
sp|Q9HVA2|ILVC_PSEAE
sp|Q9HVC4|RL25_PSEAE
sp|Q9HVI7|GLYA3_PSEAE
sp|Q9HVM1|RS20_PSEAE
sp|Q9HVN5|CLPB_PSEAE
sp|Q9HVT8|GATA_PSEAE
sp|Q9HVW7|MURA_PSEAE
sp|Q9HW11|Y4395_PSEAE
sp|Q9HWC8|RL7_PSEAE
sp|Q9HWD1|RS7_PSEAE
sp|Q9HWD5|RL3_PSEAE
sp|Q9HWD6|RL4_PSEAE
sp|Q9HWE0|RL22_PSEAE
sp|Q9HWE1|RS3_PSEAE
sp|Q9HWE4|RS17_PSEAE
sp|Q9HWE5|RL14_PSEAE
sp|Q9HWE8|RS14_PSEAE
sp|Q9HWE9|RS8_PSEAE
sp|Q9HWF1|RL18_PSEAE
sp|Q9HWF2|RS5_PSEAE
sp|Q9HWF7|RS13_PSEAE
sp|Q9HXV4|KAD_PSEAE
sp|Q9HXZ4|PYRG_PSEAE
sp|Q9HXZ5|ENO_PSEAE
sp|Q9HYR9|CLPP2_PSEAE
sp|Q9HZ76|WBPE_PSEAE
sp|Q9HZE0|DHE2_PSEAE
sp|Q9HZZ2|EFP_PSEAE
sp|Q9I0J6|NUOG_PSEAE
sp|Q9I0J9|NUOCD_PSEAE
sp|Q9I0K4|ACEA_PSEAE
sp|Q9I1L9|DLDH1_PSEAE
sp|Q9I1M0|ODB2_PSEAE
sp|Q9I1M2|ODBA_PSEAE
sp|Q9I291|GALU_PSEAE
sp|Q9I2A8|ATOB_PSEAE
sp|Q9I2P8|NFUA_PSEAE
sp|Q9I2U0|CLPX_PSEAE
sp|Q9I2U2|TIG_PSEAE
sp|Q9I2W7|RRAAH_PSEAE
sp|Q9I3C5|HTPG_PSEAE
sp|Q9I3D2|ODO2_PSEAE
sp|Q9I4S5|PDXH_PSEAE
sp|Q9I4W3|DAPA_PSEAE
sp|Q9I4Z4|PAL_PSEAE
sp|Q9I502|SYP_PSEAE
sp|Q9I558|ACSA1_PSEAE
sp|Q9I589|CBPD_PSEAE
sp|Q9I5V8|RS21_PSEAE
sp|Q9I5Y1|ALF_PSEAE
sp|Q9I5Y4|PGK_PSEAE
sp|Q9I5Z0|METK_PSEAE
sp|Q9I6M5|DAVD_PSEAE
sp|Q9I747|HCP1_PSEAE
sp|Q9I7B8|SYGB_PSEAE
sp|Q9S508|PHZB2_PSEAE
sp|Q9X4G0|HGD_PSEAE
tr|G3XCZ9|G3XCZ9_PSEAE
tr|Q9HTD9|Q9HTD9_PSEAE
tr|Q9HTR4|Q9HTR4_PSEAE
tr|Q9HTU9|Q9HTU9_PSEAE
tr|Q9HU11|Q9HU11_PSEAE
tr|Q9HU24|Q9HU24_PSEAE
tr|Q9HUC3|Q9HUC3_PSEAE
tr|Q9HUD3|Q9HUD3_PSEAE
tr|Q9HV54|Q9HV54_PSEAE
tr|Q9HVA0|Q9HVA0_PSEAE
tr|Q9HVF9|Q9HVF9_PSEAE
tr|Q9HVJ1|Q9HVJ1_PSEAE
tr|Q9HVY4|Q9HVY4_PSEAE
tr|Q9HW32|Q9HW32_PSEAE
tr|Q9HW86|Q9HW86_PSEAE
tr|Q9HWG9|Q9HWG9_PSEAE
tr|Q9HWK5|Q9HWK5_PSEAE
tr|Q9HWV0|Q9HWV0_PSEAE
tr|Q9I2C4|Q9I2C4_PSEAE;tr|Q9HX05|Q9HX05_PSEAE
tr|Q9HX12|Q9HX12_PSEAE
tr|Q9HXJ2|Q9HXJ2_PSEAE
tr|Q9HXM5|Q9HXM5_PSEAE
tr|Q9HXR8|Q9HXR8_PSEAE
tr|Q9HXU8|Q9HXU8_PSEAE
tr|Q9HY12|Q9HY12_PSEAE
tr|Q9HY13|Q9HY13_PSEAE
tr|Q9HY77|Q9HY77_PSEAE
tr|Q9HYJ0|Q9HYJ0_PSEAE
tr|Q9HYZ6|Q9HYZ6_PSEAE
tr|Q9HZK4|Q9HZK4_PSEAE
tr|Q9I028|Q9I028_PSEAE
tr|Q9I0L4|Q9I0L4_PSEAE
tr|Q9I0L5|Q9I0L5_PSEAE;REV__tr|Q9HWT9|Q9HWT9_PSEAE
tr|Q9I0T1|Q9I0T1_PSEAE
tr|Q9I0T2|Q9I0T2_PSEAE
tr|Q9I0Z9|Q9I0Z9_PSEAE
tr|Q9I1E7|Q9I1E7_PSEAE
tr|Q9I1E8|Q9I1E8_PSEAE
tr|Q9I1N7|Q9I1N7_PSEAE
tr|Q9I1Y4|Q9I1Y4_PSEAE
tr|Q9I297|Q9I297_PSEAE
tr|Q9I2A2|Q9I2A2_PSEAE
tr|Q9I2A6|Q9I2A6_PSEAE
tr|Q9I2A9|Q9I2A9_PSEAE
tr|Q9I2U9|Q9I2U9_PSEAE
tr|Q9I2V3|Q9I2V3_PSEAE
tr|Q9I2W9|Q9I2W9_PSEAE
tr|Q9I2Z1|Q9I2Z1_PSEAE
tr|Q9I3B2|Q9I3B2_PSEAE
tr|Q9I3D4|Q9I3D4_PSEAE
tr|Q9I3G1|Q9I3G1_PSEAE
tr|Q9I400|Q9I400_PSEAE
tr|Q9I402|Q9I402_PSEAE
tr|Q9I4I1|Q9I4I1_PSEAE
tr|Q9I4X1|Q9I4X1_PSEAE
tr|Q9I5E3|Q9I5E3_PSEAE
tr|Q9I5I4|Q9I5I4_PSEAE
tr|Q9I5Y8|Q9I5Y8_PSEAE
tr|Q9I659|Q9I659_PSEAE
tr|Q9I671|Q9I671_PSEAE
tr|Q9I6A0|Q9I6A0_PSEAE
tr|Q9I6H5|Q9I6H5_PSEAE

## Sheet: 2-1 Sheet3
Protein IDs-Probe 12 (subtracted)	Protein IDs-Probe 12 (full)			Fasta headers	Number of proteins	Peptides	Razor + unique peptides
REV__tr|Q9HX93|Q9HX93_PSEAE	REV__tr|Q9HX93|Q9HX93_PSEAE			>tr|Q9HX93|Q9HX93_PSEAE Probable metal transporting P-type ATPase OS=Pseudomonas aeruginosa (strain ATCC 15692 / PAO1 / 1C / PRS 101 / LMG 12228) GN=PA3920 PE=3 SV=1	1	1	1
REV__tr|Q9HXW2|Q9HXW2_PSEAE	REV__tr|Q9HXW2|Q9HXW2_PSEAE			>tr|Q9HXW2|Q9HXW2_PSEAE Probable transcriptional regulator OS=Pseudomonas aeruginosa (strain ATCC 15692 / PAO1 / 1C / PRS 101 / LMG 12228) GN=PA3678 PE=4 SV=1	1	1	1
sp|G3XD23|WBPB_PSEAE	sp|G3XD23|WBPB_PSEAE			>sp|G3XD23|WBPB_PSEAE UDP-N-acetyl-2-amino-2-deoxy-D-glucuronate oxidase OS=Pseudomonas aeruginosa (strain ATCC 15692 / PAO1 / 1C / PRS 101 / LMG 12228) GN=wbpB PE=1 SV=1	1	2	2
sp|G3XD61|WBPI_PSEAE	sp|G3XD61|WBPI_PSEAE			>sp|G3XD61|WBPI_PSEAE UDP-2,3-diacetamido-2,3-dideoxy-D-glucuronate 2-epimerase OS=Pseudomonas aeruginosa (strain ATCC 15692 / PAO1 / 1C / PRS 101 / LMG 12228) GN=wbpI PE=1 SV=1	1	1	1
sp|G3XD94|UGND_PSEAE	sp|G3XD94|UGND_PSEAE			>sp|G3XD94|UGND_PSEAE UDP-N-acetyl-D-glucosamine 6-dehydrogenase OS=Pseudomonas aeruginosa (strain ATCC 15692 / PAO1 / 1C / PRS 101 / LMG 12228) GN=wbpA PE=1 SV=1	1	3	3
sp|O52760|RPOA_PSEAE	sp|O52759|RS4_PSEAE			>sp|O52759|RS4_PSEAE 30S ribosomal protein S4 OS=Pseudomonas aeruginosa (strain ATCC 15692 / PAO1 / 1C / PRS 101 / LMG 12228) GN=rpsD PE=3 SV=2	1	4	4
sp|O52762|CATA_PSEAE	sp|O52760|RPOA_PSEAE			>sp|O52760|RPOA_PSEAE DNA-directed RNA polymerase subunit alpha OS=Pseudomonas aeruginosa (strain ATCC 15692 / PAO1 / 1C / PRS 101 / LMG 12228) GN=rpoA PE=3 SV=2	1	5	5
sp|O68822|AMPA_PSEAE	sp|O52762|CATA_PSEAE			>sp|O52762|CATA_PSEAE Catalase OS=Pseudomonas aeruginosa (strain ATCC 15692 / PAO1 / 1C / PRS 101 / LMG 12228) GN=katA PE=1 SV=1	1	15	15
sp|O69753|PHZB1_PSEAE	sp|O54439|ACP1_PSEAE			>sp|O54439|ACP1_PSEAE Acyl carrier protein 1 OS=Pseudomonas aeruginosa (strain ATCC 15692 / PAO1 / 1C / PRS 101 / LMG 12228) GN=acpP1 PE=3 SV=4	1	1	1
sp|O69754|PHZF_PSEAE	sp|O68822|AMPA_PSEAE			>sp|O68822|AMPA_PSEAE Cytosol aminopeptidase OS=Pseudomonas aeruginosa (strain ATCC 15692 / PAO1 / 1C / PRS 101 / LMG 12228) GN=pepA PE=3 SV=1	1	5	5
sp|O82850|RS2_PSEAE	sp|O69753|PHZB1_PSEAE			>sp|O69753|PHZB1_PSEAE Phenazine biosynthesis protein PhzB 1 OS=Pseudomonas aeruginosa (strain ATCC 15692 / PAO1 / 1C / PRS 101 / LMG 12228) GN=phzB1 PE=3 SV=1	1	3	1
sp|O82851|EFTS_PSEAE	sp|O69754|PHZF_PSEAE			>sp|O69754|PHZF_PSEAE Trans-2,3-dihydro-3-hydroxyanthranilate isomerase OS=Pseudomonas aeruginosa (strain ATCC 15692 / PAO1 / 1C / PRS 101 / LMG 12228) GN=phzF1 PE=3 SV=2	1	3	3
sp|O86428|ILVE_PSEAE	sp|O82850|RS2_PSEAE			>sp|O82850|RS2_PSEAE 30S ribosomal protein S2 OS=Pseudomonas aeruginosa (strain ATCC 15692 / PAO1 / 1C / PRS 101 / LMG 12228) GN=rpsB PE=3 SV=2	1	5	5
sp|P04739|FMPO_PSEAE	sp|O82851|EFTS_PSEAE			>sp|O82851|EFTS_PSEAE Elongation factor Ts OS=Pseudomonas aeruginosa (strain ATCC 15692 / PAO1 / 1C / PRS 101 / LMG 12228) GN=tsf PE=3 SV=1	1	5	5
sp|P11436|AMIE_PSEAE	sp|O86428|ILVE_PSEAE			>sp|O86428|ILVE_PSEAE Branched-chain-amino-acid aminotransferase OS=Pseudomonas aeruginosa (strain ATCC 15692 / PAO1 / 1C / PRS 101 / LMG 12228) GN=ilvE PE=1 SV=2	1	2	2
sp|P13982|ARCC_PSEAE	sp|P04739|FMPO_PSEAE			>sp|P04739|FMPO_PSEAE Fimbrial protein OS=Pseudomonas aeruginosa (strain ATCC 15692 / PAO1 / 1C / PRS 101 / LMG 12228) GN=pilA PE=1 SV=1	1	2	2
sp|P14165|CISY_PSEAE	sp|P05384|DBHB_PSEAE			>sp|P05384|DBHB_PSEAE DNA-binding protein HU-beta OS=Pseudomonas aeruginosa (strain ATCC 15692 / PAO1 / 1C / PRS 101 / LMG 12228) GN=hupB PE=1 SV=3	1	2	2
sp|P15276|ALGP_PSEAE	sp|P08308|OTCC_PSEAE			>sp|P08308|OTCC_PSEAE Ornithine carbamoyltransferase, catabolic OS=Pseudomonas aeruginosa (strain ATCC 15692 / PAO1 / 1C / PRS 101 / LMG 12228) GN=arcB PE=1 SV=3	1	11	11
sp|P28810|MMSA_PSEAE	sp|P09591|EFTU_PSEAE			>sp|P09591|EFTU_PSEAE Elongation factor Tu OS=Pseudomonas aeruginosa (strain ATCC 15692 / PAO1 / 1C / PRS 101 / LMG 12228) GN=tufA PE=1 SV=2	1	17	17
sp|P30720|CH10_PSEAE	sp|P11221|OPRI_PSEAE			>sp|P11221|OPRI_PSEAE Major outer membrane lipoprotein OS=Pseudomonas aeruginosa (strain ATCC 15692 / PAO1 / 1C / PRS 101 / LMG 12228) GN=oprI PE=3 SV=1	1	1	1
sp|P37798|ACCC_PSEAE	sp|P11436|AMIE_PSEAE			>sp|P11436|AMIE_PSEAE Aliphatic amidase OS=Pseudomonas aeruginosa (strain ATCC 15692 / PAO1 / 1C / PRS 101 / LMG 12228) GN=amiE PE=1 SV=2	1	1	1
sp|P38100|CARB_PSEAE	sp|P13794|PORF_PSEAE			>sp|P13794|PORF_PSEAE Outer membrane porin F OS=Pseudomonas aeruginosa (strain ATCC 15692 / PAO1 / 1C / PRS 101 / LMG 12228) GN=oprF PE=1 SV=1	1	7	7
sp|P43336|PHHC_PSEAE	sp|P13981|ARCA_PSEAE			>sp|P13981|ARCA_PSEAE Arginine deiminase OS=Pseudomonas aeruginosa (strain ATCC 15692 / PAO1 / 1C / PRS 101 / LMG 12228) GN=arcA PE=1 SV=2	1	17	17
sp|P47204|FTSZ_PSEAE	sp|P13982|ARCC_PSEAE			>sp|P13982|ARCC_PSEAE Carbamate kinase OS=Pseudomonas aeruginosa (strain ATCC 15692 / PAO1 / 1C / PRS 101 / LMG 12228) GN=arcC PE=3 SV=1	1	5	5
sp|P47205|LPXC_PSEAE	sp|P14165|CISY_PSEAE			>sp|P14165|CISY_PSEAE Citrate synthase OS=Pseudomonas aeruginosa (strain ATCC 15692 / PAO1 / 1C / PRS 101 / LMG 12228) GN=gltA PE=3 SV=2	1	2	2
sp|P48247|GSA_PSEAE	sp|P15276|ALGP_PSEAE			>sp|P15276|ALGP_PSEAE Transcriptional regulatory protein AlgP OS=Pseudomonas aeruginosa (strain ATCC 15692 / PAO1 / 1C / PRS 101 / LMG 12228) GN=algP PE=4 SV=2	1	1	1
sp|P57668|TPX_PSEAE	sp|P28810|MMSA_PSEAE			>sp|P28810|MMSA_PSEAE Methylmalonate-semialdehyde dehydrogenase [acylating] OS=Pseudomonas aeruginosa (strain ATCC 15692 / PAO1 / 1C / PRS 101 / LMG 12228) GN=mmsA PE=1 SV=2	1	1	1
sp|P72173|AAT_PSEAE	sp|P30718|CH60_PSEAE			>sp|P30718|CH60_PSEAE 60 kDa chaperonin OS=Pseudomonas aeruginosa (strain ATCC 15692 / PAO1 / 1C / PRS 101 / LMG 12228) GN=groL PE=1 SV=3	1	29	29
sp|P80358|ASTG_PSEAE	sp|P30720|CH10_PSEAE			>sp|P30720|CH10_PSEAE 10 kDa chaperonin OS=Pseudomonas aeruginosa (strain ATCC 15692 / PAO1 / 1C / PRS 101 / LMG 12228) GN=groS PE=3 SV=1	1	1	1
sp|Q51422|SYDND_PSEAE	sp|P37798|ACCC_PSEAE			>sp|P37798|ACCC_PSEAE Biotin carboxylase OS=Pseudomonas aeruginosa (strain ATCC 15692 / PAO1 / 1C / PRS 101 / LMG 12228) GN=accC PE=1 SV=1	1	3	3
sp|Q51561|RPOB_PSEAE	sp|P37799|BCCP_PSEAE			>sp|P37799|BCCP_PSEAE Biotin carboxyl carrier protein of acetyl-CoA carboxylase OS=Pseudomonas aeruginosa (strain ATCC 15692 / PAO1 / 1C / PRS 101 / LMG 12228) GN=accB PE=3 SV=1	1	5	5
sp|Q59636|NDK_PSEAE	sp|P38100|CARB_PSEAE			>sp|P38100|CARB_PSEAE Carbamoyl-phosphate synthase large chain OS=Pseudomonas aeruginosa (strain ATCC 15692 / PAO1 / 1C / PRS 101 / LMG 12228) GN=carB PE=3 SV=3	1	2	2
sp|Q59637|ODP1_PSEAE	sp|P43336|PHHC_PSEAE			>sp|P43336|PHHC_PSEAE Aromatic-amino-acid aminotransferase OS=Pseudomonas aeruginosa (strain ATCC 15692 / PAO1 / 1C / PRS 101 / LMG 12228) GN=phhC PE=3 SV=2	1	7	7
sp|Q9HT14|ATP6_PSEAE	sp|P47204|FTSZ_PSEAE			>sp|P47204|FTSZ_PSEAE Cell division protein FtsZ OS=Pseudomonas aeruginosa (strain ATCC 15692 / PAO1 / 1C / PRS 101 / LMG 12228) GN=ftsZ PE=1 SV=2	1	1	1
sp|Q9HT16|ATPF_PSEAE	sp|P47205|LPXC_PSEAE			>sp|P47205|LPXC_PSEAE UDP-3-O-acyl-N-acetylglucosamine deacetylase OS=Pseudomonas aeruginosa (strain ATCC 15692 / PAO1 / 1C / PRS 101 / LMG 12228) GN=lpxC PE=1 SV=2	1	1	1
sp|Q9HT19|ATPG_PSEAE	sp|P48247|GSA_PSEAE			>sp|P48247|GSA_PSEAE Glutamate-1-semialdehyde 2,1-aminomutase OS=Pseudomonas aeruginosa (strain ATCC 15692 / PAO1 / 1C / PRS 101 / LMG 12228) GN=hemL PE=1 SV=2	1	1	1
sp|Q9HT20|ATPB_PSEAE	sp|P53593|SUCC_PSEAE			>sp|P53593|SUCC_PSEAE Succinyl-CoA ligase [ADP-forming] subunit beta OS=Pseudomonas aeruginosa (strain ATCC 15692 / PAO1 / 1C / PRS 101 / LMG 12228) GN=sucC PE=3 SV=2	1	12	12
sp|Q9HT21|ATPE_PSEAE	sp|P53641|SODF_PSEAE			>sp|P53641|SODF_PSEAE Superoxide dismutase [Fe] OS=Pseudomonas aeruginosa (strain ATCC 15692 / PAO1 / 1C / PRS 101 / LMG 12228) GN=sodB PE=3 SV=3	1	6	6
sp|Q9HT95|ATSE4_PSEAE	sp|P57668|TPX_PSEAE			>sp|P57668|TPX_PSEAE Probable thiol peroxidase OS=Pseudomonas aeruginosa (strain ATCC 15692 / PAO1 / 1C / PRS 101 / LMG 12228) GN=tpx PE=3 SV=1	1	2	2
sp|Q9HTD7|ASPA_PSEAE	sp|P72173|AAT_PSEAE			>sp|P72173|AAT_PSEAE Aspartate aminotransferase OS=Pseudomonas aeruginosa (strain ATCC 15692 / PAO1 / 1C / PRS 101 / LMG 12228) GN=aspC PE=3 SV=2	1	2	2
sp|Q9HU65|GLNA_PSEAE	sp|P80358|ASTG_PSEAE			>sp|P80358|ASTG_PSEAE Arginine N-succinyltransferase subunit beta OS=Pseudomonas aeruginosa (strain ATCC 15692 / PAO1 / 1C / PRS 101 / LMG 12228) GN=aruG PE=1 SV=2	1	1	1
sp|Q9HU73|F16PA_PSEAE	sp|Q51422|SYDND_PSEAE			>sp|Q51422|SYDND_PSEAE Aspartate--tRNA(Asp/Asn) ligase OS=Pseudomonas aeruginosa (strain ATCC 15692 / PAO1 / 1C / PRS 101 / LMG 12228) GN=aspS PE=1 SV=2	1	1	1
sp|Q9HUC5|HSLU_PSEAE	sp|Q51561|RPOB_PSEAE			>sp|Q51561|RPOB_PSEAE DNA-directed RNA polymerase subunit beta OS=Pseudomonas aeruginosa (strain ATCC 15692 / PAO1 / 1C / PRS 101 / LMG 12228) GN=rpoB PE=3 SV=2	1	8	8
sp|Q9HUC8|SYR_PSEAE	sp|Q51567|SUCD_PSEAE			>sp|Q51567|SUCD_PSEAE Succinyl-CoA ligase [ADP-forming] subunit alpha OS=Pseudomonas aeruginosa (strain ATCC 15692 / PAO1 / 1C / PRS 101 / LMG 12228) GN=sucD PE=3 SV=2	1	9	9
sp|Q9HUM6|PURA_PSEAE	sp|Q59636|NDK_PSEAE			>sp|Q59636|NDK_PSEAE Nucleoside diphosphate kinase OS=Pseudomonas aeruginosa (strain ATCC 15692 / PAO1 / 1C / PRS 101 / LMG 12228) GN=ndk PE=3 SV=2	1	4	4
sp|Q9HUM9|RS6_PSEAE	sp|Q59637|ODP1_PSEAE			>sp|Q59637|ODP1_PSEAE Pyruvate dehydrogenase E1 component OS=Pseudomonas aeruginosa (strain ATCC 15692 / PAO1 / 1C / PRS 101 / LMG 12228) GN=aceE PE=3 SV=2	1	15	15
sp|Q9HUN0|RS18_PSEAE	sp|Q59638|ODP2_PSEAE			>sp|Q59638|ODP2_PSEAE Dihydrolipoyllysine-residue acetyltransferase component of pyruvate dehydrogenase complex OS=Pseudomonas aeruginosa (strain ATCC 15692 / PAO1 / 1C / PRS 101 / LMG 12228) GN=aceF PE=2 SV=2	1	8	8
sp|Q9HV59|PNP_PSEAE	sp|Q9HT14|ATP6_PSEAE			>sp|Q9HT14|ATP6_PSEAE ATP synthase subunit a OS=Pseudomonas aeruginosa (strain ATCC 15692 / PAO1 / 1C / PRS 101 / LMG 12228) GN=atpB PE=3 SV=1	1	2	2
sp|Q9HVA2|ILVC_PSEAE	sp|Q9HT16|ATPF_PSEAE			>sp|Q9HT16|ATPF_PSEAE ATP synthase subunit b OS=Pseudomonas aeruginosa (strain ATCC 15692 / PAO1 / 1C / PRS 101 / LMG 12228) GN=atpF PE=3 SV=1	1	5	5
sp|Q9HVC4|RL25_PSEAE	sp|Q9HT18|ATPA_PSEAE			>sp|Q9HT18|ATPA_PSEAE ATP synthase subunit alpha OS=Pseudomonas aeruginosa (strain ATCC 15692 / PAO1 / 1C / PRS 101 / LMG 12228) GN=atpA PE=3 SV=1	1	13	13
sp|Q9HVI7|GLYA3_PSEAE	sp|Q9HT19|ATPG_PSEAE			>sp|Q9HT19|ATPG_PSEAE ATP synthase gamma chain OS=Pseudomonas aeruginosa (strain ATCC 15692 / PAO1 / 1C / PRS 101 / LMG 12228) GN=atpG PE=3 SV=1	1	4	4
sp|Q9HVM1|RS20_PSEAE	sp|Q9HT20|ATPB_PSEAE			>sp|Q9HT20|ATPB_PSEAE ATP synthase subunit beta OS=Pseudomonas aeruginosa (strain ATCC 15692 / PAO1 / 1C / PRS 101 / LMG 12228) GN=atpD PE=3 SV=1	1	9	9
sp|Q9HVN5|CLPB_PSEAE	sp|Q9HT21|ATPE_PSEAE			>sp|Q9HT21|ATPE_PSEAE ATP synthase epsilon chain OS=Pseudomonas aeruginosa (strain ATCC 15692 / PAO1 / 1C / PRS 101 / LMG 12228) GN=atpC PE=3 SV=1	1	1	1
sp|Q9HVT8|GATA_PSEAE	sp|Q9HT95|ATSE4_PSEAE			>sp|Q9HT95|ATSE4_PSEAE Acetyltransferase PA5475 OS=Pseudomonas aeruginosa (strain ATCC 15692 / PAO1 / 1C / PRS 101 / LMG 12228) GN=PA5475 PE=3 SV=1	1	2	2
sp|Q9HVW7|MURA_PSEAE	sp|Q9HTD7|ASPA_PSEAE			>sp|Q9HTD7|ASPA_PSEAE Aspartate ammonia-lyase OS=Pseudomonas aeruginosa (strain ATCC 15692 / PAO1 / 1C / PRS 101 / LMG 12228) GN=aspA PE=3 SV=1	1	5	5
sp|Q9HW11|Y4395_PSEAE	sp|Q9HTN8|RL28_PSEAE			>sp|Q9HTN8|RL28_PSEAE 50S ribosomal protein L28 OS=Pseudomonas aeruginosa (strain ATCC 15692 / PAO1 / 1C / PRS 101 / LMG 12228) GN=rpmB PE=3 SV=1	1	1	1
sp|Q9HWC8|RL7_PSEAE	sp|Q9HU65|GLNA_PSEAE			>sp|Q9HU65|GLNA_PSEAE Glutamine synthetase OS=Pseudomonas aeruginosa (strain ATCC 15692 / PAO1 / 1C / PRS 101 / LMG 12228) GN=glnA PE=1 SV=1	1	5	5
sp|Q9HWD1|RS7_PSEAE	sp|Q9HU73|F16PA_PSEAE			>sp|Q9HU73|F16PA_PSEAE Fructose-1,6-bisphosphatase class 1 OS=Pseudomonas aeruginosa (strain ATCC 15692 / PAO1 / 1C / PRS 101 / LMG 12228) GN=fbp PE=3 SV=1	1	1	1
sp|Q9HWD5|RL3_PSEAE	sp|Q9HUC5|HSLU_PSEAE			>sp|Q9HUC5|HSLU_PSEAE ATP-dependent protease ATPase subunit HslU OS=Pseudomonas aeruginosa (strain ATCC 15692 / PAO1 / 1C / PRS 101 / LMG 12228) GN=hslU PE=3 SV=1	1	3	3
sp|Q9HWD6|RL4_PSEAE	sp|Q9HUC8|SYR_PSEAE			>sp|Q9HUC8|SYR_PSEAE Arginine--tRNA ligase OS=Pseudomonas aeruginosa (strain ATCC 15692 / PAO1 / 1C / PRS 101 / LMG 12228) GN=argS PE=3 SV=1	1	2	2
sp|Q9HWE0|RL22_PSEAE	sp|Q9HUM6|PURA_PSEAE			>sp|Q9HUM6|PURA_PSEAE Adenylosuccinate synthetase OS=Pseudomonas aeruginosa (strain ATCC 15692 / PAO1 / 1C / PRS 101 / LMG 12228) GN=purA PE=3 SV=1	1	4	4
sp|Q9HWE1|RS3_PSEAE	sp|Q9HUM9|RS6_PSEAE			>sp|Q9HUM9|RS6_PSEAE 30S ribosomal protein S6 OS=Pseudomonas aeruginosa (strain ATCC 15692 / PAO1 / 1C / PRS 101 / LMG 12228) GN=rpsF PE=3 SV=1	1	2	2
sp|Q9HWE4|RS17_PSEAE	sp|Q9HUN0|RS18_PSEAE			>sp|Q9HUN0|RS18_PSEAE 30S ribosomal protein S18 OS=Pseudomonas aeruginosa (strain ATCC 15692 / PAO1 / 1C / PRS 101 / LMG 12228) GN=rpsR PE=3 SV=1	1	1	1
sp|Q9HWE5|RL14_PSEAE	sp|Q9HV43|DNAK_PSEAE			>sp|Q9HV43|DNAK_PSEAE Chaperone protein DnaK OS=Pseudomonas aeruginosa (strain ATCC 15692 / PAO1 / 1C / PRS 101 / LMG 12228) GN=dnaK PE=3 SV=1	1	10	10
sp|Q9HWE8|RS14_PSEAE	sp|Q9HV59|PNP_PSEAE			>sp|Q9HV59|PNP_PSEAE Polyribonucleotide nucleotidyltransferase OS=Pseudomonas aeruginosa (strain ATCC 15692 / PAO1 / 1C / PRS 101 / LMG 12228) GN=pnp PE=3 SV=1	1	3	3
sp|Q9HWE9|RS8_PSEAE	sp|Q9HVA2|ILVC_PSEAE			>sp|Q9HVA2|ILVC_PSEAE Ketol-acid reductoisomerase OS=Pseudomonas aeruginosa (strain ATCC 15692 / PAO1 / 1C / PRS 101 / LMG 12228) GN=ilvC PE=1 SV=1	1	3	3
sp|Q9HWF1|RL18_PSEAE	sp|Q9HVC4|RL25_PSEAE			>sp|Q9HVC4|RL25_PSEAE 50S ribosomal protein L25 OS=Pseudomonas aeruginosa (strain ATCC 15692 / PAO1 / 1C / PRS 101 / LMG 12228) GN=rplY PE=3 SV=1	1	3	3
sp|Q9HWF2|RS5_PSEAE	sp|Q9HVI7|GLYA3_PSEAE			>sp|Q9HVI7|GLYA3_PSEAE Serine hydroxymethyltransferase 3 OS=Pseudomonas aeruginosa (strain ATCC 15692 / PAO1 / 1C / PRS 101 / LMG 12228) GN=glyA2 PE=3 SV=1	1	2	2
sp|Q9HWF7|RS13_PSEAE	sp|Q9HVM1|RS20_PSEAE			>sp|Q9HVM1|RS20_PSEAE 30S ribosomal protein S20 OS=Pseudomonas aeruginosa (strain ATCC 15692 / PAO1 / 1C / PRS 101 / LMG 12228) GN=rpsT PE=1 SV=3	1	1	1
sp|Q9HXV4|KAD_PSEAE	sp|Q9HVN5|CLPB_PSEAE			>sp|Q9HVN5|CLPB_PSEAE Chaperone protein ClpB OS=Pseudomonas aeruginosa (strain ATCC 15692 / PAO1 / 1C / PRS 101 / LMG 12228) GN=clpB PE=3 SV=1	1	4	4
sp|Q9HXZ4|PYRG_PSEAE	sp|Q9HVT8|GATA_PSEAE			>sp|Q9HVT8|GATA_PSEAE Glutamyl-tRNA(Gln) amidotransferase subunit A OS=Pseudomonas aeruginosa (strain ATCC 15692 / PAO1 / 1C / PRS 101 / LMG 12228) GN=gatA PE=1 SV=1	1	1	1
sp|Q9HXZ5|ENO_PSEAE	sp|Q9HVW7|MURA_PSEAE			>sp|Q9HVW7|MURA_PSEAE UDP-N-acetylglucosamine 1-carboxyvinyltransferase OS=Pseudomonas aeruginosa (strain ATCC 15692 / PAO1 / 1C / PRS 101 / LMG 12228) GN=murA PE=1 SV=1	1	1	1
sp|Q9HYR9|CLPP2_PSEAE	sp|Q9HW11|Y4395_PSEAE			>sp|Q9HW11|Y4395_PSEAE UPF0234 protein PA4395 OS=Pseudomonas aeruginosa (strain ATCC 15692 / PAO1 / 1C / PRS 101 / LMG 12228) GN=PA4395 PE=3 SV=1	1	2	2
sp|Q9HZ76|WBPE_PSEAE	sp|Q9HWC8|RL7_PSEAE			>sp|Q9HWC8|RL7_PSEAE 50S ribosomal protein L7/L12 OS=Pseudomonas aeruginosa (strain ATCC 15692 / PAO1 / 1C / PRS 101 / LMG 12228) GN=rplL PE=3 SV=1	1	2	2
sp|Q9HZE0|DHE2_PSEAE	sp|Q9HWC9|RPOC_PSEAE			>sp|Q9HWC9|RPOC_PSEAE DNA-directed RNA polymerase subunit beta OS=Pseudomonas aeruginosa (strain ATCC 15692 / PAO1 / 1C / PRS 101 / LMG 12228) GN=rpoC PE=3 SV=1	1	16	16
sp|Q9HZZ2|EFP_PSEAE	sp|Q9HWD1|RS7_PSEAE			>sp|Q9HWD1|RS7_PSEAE 30S ribosomal protein S7 OS=Pseudomonas aeruginosa (strain ATCC 15692 / PAO1 / 1C / PRS 101 / LMG 12228) GN=rpsG PE=3 SV=1	1	3	3
sp|Q9I0J6|NUOG_PSEAE	sp|Q9HWD2|EFG1_PSEAE;sp|Q9I244|EFG2_PSEAE			>sp|Q9HWD2|EFG1_PSEAE Elongation factor G 1 OS=Pseudomonas aeruginosa (strain ATCC 15692 / PAO1 / 1C / PRS 101 / LMG 12228) GN=fusA PE=1 SV=1	2	18	18
sp|Q9I0J9|NUOCD_PSEAE	sp|Q9HWD5|RL3_PSEAE			>sp|Q9HWD5|RL3_PSEAE 50S ribosomal protein L3 OS=Pseudomonas aeruginosa (strain ATCC 15692 / PAO1 / 1C / PRS 101 / LMG 12228) GN=rplC PE=3 SV=1	1	4	4
sp|Q9I0K4|ACEA_PSEAE	sp|Q9HWD6|RL4_PSEAE			>sp|Q9HWD6|RL4_PSEAE 50S ribosomal protein L4 OS=Pseudomonas aeruginosa (strain ATCC 15692 / PAO1 / 1C / PRS 101 / LMG 12228) GN=rplD PE=3 SV=1	1	1	1
sp|Q9I1L9|DLDH1_PSEAE	sp|Q9HWD8|RL2_PSEAE			>sp|Q9HWD8|RL2_PSEAE 50S ribosomal protein L2 OS=Pseudomonas aeruginosa (strain ATCC 15692 / PAO1 / 1C / PRS 101 / LMG 12228) GN=rplB PE=3 SV=1	1	4	4
sp|Q9I1M0|ODB2_PSEAE	sp|Q9HWE0|RL22_PSEAE			>sp|Q9HWE0|RL22_PSEAE 50S ribosomal protein L22 OS=Pseudomonas aeruginosa (strain ATCC 15692 / PAO1 / 1C / PRS 101 / LMG 12228) GN=rplV PE=3 SV=1	1	4	4
sp|Q9I1M2|ODBA_PSEAE	sp|Q9HWE1|RS3_PSEAE			>sp|Q9HWE1|RS3_PSEAE 30S ribosomal protein S3 OS=Pseudomonas aeruginosa (strain ATCC 15692 / PAO1 / 1C / PRS 101 / LMG 12228) GN=rpsC PE=3 SV=1	1	3	3
sp|Q9I291|GALU_PSEAE	sp|Q9HWE2|RL16_PSEAE			>sp|Q9HWE2|RL16_PSEAE 50S ribosomal protein L16 OS=Pseudomonas aeruginosa (strain ATCC 15692 / PAO1 / 1C / PRS 101 / LMG 12228) GN=rplP PE=3 SV=1	1	3	3
sp|Q9I2A8|ATOB_PSEAE	sp|Q9HWE4|RS17_PSEAE			>sp|Q9HWE4|RS17_PSEAE 30S ribosomal protein S17 OS=Pseudomonas aeruginosa (strain ATCC 15692 / PAO1 / 1C / PRS 101 / LMG 12228) GN=rpsQ PE=3 SV=1	1	2	2
sp|Q9I2P8|NFUA_PSEAE	sp|Q9HWE5|RL14_PSEAE			>sp|Q9HWE5|RL14_PSEAE 50S ribosomal protein L14 OS=Pseudomonas aeruginosa (strain ATCC 15692 / PAO1 / 1C / PRS 101 / LMG 12228) GN=rplN PE=3 SV=1	1	2	2
sp|Q9I2U0|CLPX_PSEAE	sp|Q9HWE8|RS14_PSEAE			>sp|Q9HWE8|RS14_PSEAE 30S ribosomal protein S14 OS=Pseudomonas aeruginosa (strain ATCC 15692 / PAO1 / 1C / PRS 101 / LMG 12228) GN=rpsN PE=3 SV=1	1	2	2
sp|Q9I2U2|TIG_PSEAE	sp|Q9HWE9|RS8_PSEAE			>sp|Q9HWE9|RS8_PSEAE 30S ribosomal protein S8 OS=Pseudomonas aeruginosa (strain ATCC 15692 / PAO1 / 1C / PRS 101 / LMG 12228) GN=rpsH PE=3 SV=1	1	3	3
sp|Q9I2W7|RRAAH_PSEAE	sp|Q9HWF1|RL18_PSEAE			>sp|Q9HWF1|RL18_PSEAE 50S ribosomal protein L18 OS=Pseudomonas aeruginosa (strain ATCC 15692 / PAO1 / 1C / PRS 101 / LMG 12228) GN=rplR PE=3 SV=1	1	2	2
sp|Q9I3C5|HTPG_PSEAE	sp|Q9HWF2|RS5_PSEAE			>sp|Q9HWF2|RS5_PSEAE 30S ribosomal protein S5 OS=Pseudomonas aeruginosa (strain ATCC 15692 / PAO1 / 1C / PRS 101 / LMG 12228) GN=rpsE PE=3 SV=1	1	4	4
sp|Q9I3D2|ODO2_PSEAE	sp|Q9HWF7|RS13_PSEAE			>sp|Q9HWF7|RS13_PSEAE 30S ribosomal protein S13 OS=Pseudomonas aeruginosa (strain ATCC 15692 / PAO1 / 1C / PRS 101 / LMG 12228) GN=rpsM PE=3 SV=1	1	1	1
sp|Q9I4S5|PDXH_PSEAE	sp|Q9HXV4|KAD_PSEAE			>sp|Q9HXV4|KAD_PSEAE Adenylate kinase OS=Pseudomonas aeruginosa (strain ATCC 15692 / PAO1 / 1C / PRS 101 / LMG 12228) GN=adk PE=3 SV=1	1	3	3
sp|Q9I4W3|DAPA_PSEAE	sp|Q9HXZ4|PYRG_PSEAE			>sp|Q9HXZ4|PYRG_PSEAE CTP synthase OS=Pseudomonas aeruginosa (strain ATCC 15692 / PAO1 / 1C / PRS 101 / LMG 12228) GN=pyrG PE=3 SV=1	1	2	2
sp|Q9I4Z4|PAL_PSEAE	sp|Q9HXZ5|ENO_PSEAE			>sp|Q9HXZ5|ENO_PSEAE Enolase OS=Pseudomonas aeruginosa (strain ATCC 15692 / PAO1 / 1C / PRS 101 / LMG 12228) GN=eno PE=3 SV=1	1	5	5
sp|Q9I502|SYP_PSEAE	sp|Q9HYR9|CLPP2_PSEAE			>sp|Q9HYR9|CLPP2_PSEAE ATP-dependent Clp protease proteolytic subunit 2 OS=Pseudomonas aeruginosa (strain ATCC 15692 / PAO1 / 1C / PRS 101 / LMG 12228) GN=clpP2 PE=3 SV=1	1	1	1
sp|Q9I558|ACSA1_PSEAE	sp|Q9HZ71|RS1_PSEAE			>sp|Q9HZ71|RS1_PSEAE 30S ribosomal protein S1 OS=Pseudomonas aeruginosa (strain ATCC 15692 / PAO1 / 1C / PRS 101 / LMG 12228) GN=rpsA PE=3 SV=1	1	12	12
sp|Q9I589|CBPD_PSEAE	sp|Q9HZ76|WBPE_PSEAE			>sp|Q9HZ76|WBPE_PSEAE UDP-2-acetamido-2-deoxy-3-oxo-D-glucuronate aminotransferase OS=Pseudomonas aeruginosa (strain ATCC 15692 / PAO1 / 1C / PRS 101 / LMG 12228) GN=wbpE PE=1 SV=1	1	2	2
sp|Q9I5V8|RS21_PSEAE	sp|Q9HZE0|DHE2_PSEAE			>sp|Q9HZE0|DHE2_PSEAE NAD-specific glutamate dehydrogenase OS=Pseudomonas aeruginosa (strain ATCC 15692 / PAO1 / 1C / PRS 101 / LMG 12228) GN=gdhB PE=1 SV=1	1	16	16
sp|Q9I5Y1|ALF_PSEAE	sp|Q9HZZ2|EFP_PSEAE			>sp|Q9HZZ2|EFP_PSEAE Elongation factor P OS=Pseudomonas aeruginosa (strain ATCC 15692 / PAO1 / 1C / PRS 101 / LMG 12228) GN=efp PE=1 SV=1	1	3	3
sp|Q9I5Y4|PGK_PSEAE	sp|Q9I0J6|NUOG_PSEAE			>sp|Q9I0J6|NUOG_PSEAE NADH-quinone oxidoreductase subunit G OS=Pseudomonas aeruginosa (strain ATCC 15692 / PAO1 / 1C / PRS 101 / LMG 12228) GN=nuoG PE=3 SV=1	1	2	2
sp|Q9I5Z0|METK_PSEAE	sp|Q9I0J9|NUOCD_PSEAE			>sp|Q9I0J9|NUOCD_PSEAE NADH-quinone oxidoreductase subunit C/D OS=Pseudomonas aeruginosa (strain ATCC 15692 / PAO1 / 1C / PRS 101 / LMG 12228) GN=nuoC PE=3 SV=1	1	2	2
sp|Q9I6M5|DAVD_PSEAE	sp|Q9I0K4|ACEA_PSEAE			>sp|Q9I0K4|ACEA_PSEAE Isocitrate lyase OS=Pseudomonas aeruginosa (strain ATCC 15692 / PAO1 / 1C / PRS 101 / LMG 12228) GN=PA2634 PE=1 SV=1	1	4	4
sp|Q9I747|HCP1_PSEAE	sp|Q9I1L9|DLDH1_PSEAE			>sp|Q9I1L9|DLDH1_PSEAE Dihydrolipoyl dehydrogenase OS=Pseudomonas aeruginosa (strain ATCC 15692 / PAO1 / 1C / PRS 101 / LMG 12228) GN=lpdV PE=1 SV=1	1	6	6
sp|Q9I7B8|SYGB_PSEAE	sp|Q9I1M0|ODB2_PSEAE			>sp|Q9I1M0|ODB2_PSEAE Lipoamide acyltransferase component of branched-chain alpha-keto acid dehydrogenase complex OS=Pseudomonas aeruginosa (strain ATCC 15692 / PAO1 / 1C / PRS 101 / LMG 12228) GN=bkdB PE=1 SV=1	1	1	1
sp|Q9S508|PHZB2_PSEAE	sp|Q9I1M2|ODBA_PSEAE			>sp|Q9I1M2|ODBA_PSEAE 2-oxoisovalerate dehydrogenase subunit alpha OS=Pseudomonas aeruginosa (strain ATCC 15692 / PAO1 / 1C / PRS 101 / LMG 12228) GN=bkdA1 PE=3 SV=1	1	1	1
sp|Q9X4G0|HGD_PSEAE	sp|Q9I291|GALU_PSEAE			>sp|Q9I291|GALU_PSEAE UTP--glucose-1-phosphate uridylyltransferase OS=Pseudomonas aeruginosa (strain ATCC 15692 / PAO1 / 1C / PRS 101 / LMG 12228) GN=galU PE=3 SV=1	1	2	2
tr|G3XCZ9|G3XCZ9_PSEAE	sp|Q9I2A8|ATOB_PSEAE			>sp|Q9I2A8|ATOB_PSEAE Acetyl-CoA acetyltransferase OS=Pseudomonas aeruginosa (strain ATCC 15692 / PAO1 / 1C / PRS 101 / LMG 12228) GN=atoB PE=3 SV=1	1	9	9
tr|Q9HTD9|Q9HTD9_PSEAE	sp|Q9I2P8|NFUA_PSEAE			>sp|Q9I2P8|NFUA_PSEAE Fe/S biogenesis protein NfuA OS=Pseudomonas aeruginosa (strain ATCC 15692 / PAO1 / 1C / PRS 101 / LMG 12228) GN=nfuA PE=3 SV=1	1	1	1
tr|Q9HTR4|Q9HTR4_PSEAE	sp|Q9I2U0|CLPX_PSEAE			>sp|Q9I2U0|CLPX_PSEAE ATP-dependent Clp protease ATP-binding subunit ClpX OS=Pseudomonas aeruginosa (strain ATCC 15692 / PAO1 / 1C / PRS 101 / LMG 12228) GN=clpX PE=3 SV=1	1	1	1
tr|Q9HTU9|Q9HTU9_PSEAE	sp|Q9I2U2|TIG_PSEAE			>sp|Q9I2U2|TIG_PSEAE Trigger factor OS=Pseudomonas aeruginosa (strain ATCC 15692 / PAO1 / 1C / PRS 101 / LMG 12228) GN=tig PE=3 SV=1	1	2	2
tr|Q9HU11|Q9HU11_PSEAE	sp|Q9I2V5|ACNB_PSEAE			>sp|Q9I2V5|ACNB_PSEAE Aconitate hydratase B OS=Pseudomonas aeruginosa (strain ATCC 15692 / PAO1 / 1C / PRS 101 / LMG 12228) GN=acnB PE=3 SV=1	1	18	18
tr|Q9HU24|Q9HU24_PSEAE	sp|Q9I2W7|RRAAH_PSEAE			>sp|Q9I2W7|RRAAH_PSEAE Putative 4-hydroxy-4-methyl-2-oxoglutarate aldolase OS=Pseudomonas aeruginosa (strain ATCC 15692 / PAO1 / 1C / PRS 101 / LMG 12228) GN=PA1772 PE=1 SV=1	1	3	3
tr|Q9HUC3|Q9HUC3_PSEAE	sp|Q9I3C5|HTPG_PSEAE			>sp|Q9I3C5|HTPG_PSEAE Chaperone protein HtpG OS=Pseudomonas aeruginosa (strain ATCC 15692 / PAO1 / 1C / PRS 101 / LMG 12228) GN=htpG PE=3 SV=1	1	4	4
tr|Q9HUD3|Q9HUD3_PSEAE	sp|Q9I3D1|DLDH2_PSEAE			>sp|Q9I3D1|DLDH2_PSEAE Dihydrolipoyl dehydrogenase OS=Pseudomonas aeruginosa (strain ATCC 15692 / PAO1 / 1C / PRS 101 / LMG 12228) GN=lpdG PE=3 SV=1	1	10	10
tr|Q9HV54|Q9HV54_PSEAE	sp|Q9I3D2|ODO2_PSEAE			>sp|Q9I3D2|ODO2_PSEAE Dihydrolipoyllysine-residue succinyltransferase component of 2-oxoglutarate dehydrogenase complex OS=Pseudomonas aeruginosa (strain ATCC 15692 / PAO1 / 1C / PRS 101 / LMG 12228) GN=sucB PE=3 SV=1	1	1	1
tr|Q9HVA0|Q9HVA0_PSEAE	sp|Q9I3F5|ACNA_PSEAE			>sp|Q9I3F5|ACNA_PSEAE Aconitate hydratase A OS=Pseudomonas aeruginosa (strain ATCC 15692 / PAO1 / 1C / PRS 101 / LMG 12228) GN=acnA PE=3 SV=1	1	16	16
tr|Q9HVF9|Q9HVF9_PSEAE	sp|Q9I4S5|PDXH_PSEAE			>sp|Q9I4S5|PDXH_PSEAE Pyridoxine/pyridoxamine 5-phosphate oxidase OS=Pseudomonas aeruginosa (strain ATCC 15692 / PAO1 / 1C / PRS 101 / LMG 12228) GN=pdxH PE=3 SV=1	1	1	1
tr|Q9HVJ1|Q9HVJ1_PSEAE	sp|Q9I4W3|DAPA_PSEAE			>sp|Q9I4W3|DAPA_PSEAE 4-hydroxy-tetrahydrodipicolinate synthase OS=Pseudomonas aeruginosa (strain ATCC 15692 / PAO1 / 1C / PRS 101 / LMG 12228) GN=dapA PE=1 SV=1	1	3	3
tr|Q9HVY4|Q9HVY4_PSEAE	sp|Q9I4Z4|PAL_PSEAE			>sp|Q9I4Z4|PAL_PSEAE Peptidoglycan-associated lipoprotein OS=Pseudomonas aeruginosa (strain ATCC 15692 / PAO1 / 1C / PRS 101 / LMG 12228) GN=pal PE=3 SV=1	1	4	4
tr|Q9HW32|Q9HW32_PSEAE	sp|Q9I502|SYP_PSEAE			>sp|Q9I502|SYP_PSEAE Proline--tRNA ligase OS=Pseudomonas aeruginosa (strain ATCC 15692 / PAO1 / 1C / PRS 101 / LMG 12228) GN=proS PE=3 SV=1	1	1	1
tr|Q9HW86|Q9HW86_PSEAE	sp|Q9I558|ACSA1_PSEAE			>sp|Q9I558|ACSA1_PSEAE Acetyl-coenzyme A synthetase 1 OS=Pseudomonas aeruginosa (strain ATCC 15692 / PAO1 / 1C / PRS 101 / LMG 12228) GN=acsA1 PE=3 SV=1	1	1	1
tr|Q9HWG9|Q9HWG9_PSEAE	sp|Q9I576|HPPD_PSEAE			>sp|Q9I576|HPPD_PSEAE 4-hydroxyphenylpyruvate dioxygenase OS=Pseudomonas aeruginosa (strain ATCC 15692 / PAO1 / 1C / PRS 101 / LMG 12228) GN=hpd PE=3 SV=1	1	3	3
tr|Q9HWK5|Q9HWK5_PSEAE	sp|Q9I589|CBPD_PSEAE			>sp|Q9I589|CBPD_PSEAE Chitin-binding protein CbpD OS=Pseudomonas aeruginosa (strain ATCC 15692 / PAO1 / 1C / PRS 101 / LMG 12228) GN=cbpD PE=1 SV=1	1	1	1
tr|Q9HWV0|Q9HWV0_PSEAE	sp|Q9I5V8|RS21_PSEAE			>sp|Q9I5V8|RS21_PSEAE 30S ribosomal protein S21 OS=Pseudomonas aeruginosa (strain ATCC 15692 / PAO1 / 1C / PRS 101 / LMG 12228) GN=rpsU PE=1 SV=3	1	4	4
tr|Q9I2C4|Q9I2C4_PSEAE;tr|Q9HX05|Q9HX05_PSEAE	sp|Q9I5Y1|ALF_PSEAE			>sp|Q9I5Y1|ALF_PSEAE Fructose-bisphosphate aldolase OS=Pseudomonas aeruginosa (strain ATCC 15692 / PAO1 / 1C / PRS 101 / LMG 12228) GN=fba PE=3 SV=1	1	5	5
tr|Q9HX12|Q9HX12_PSEAE	sp|Q9I5Y4|PGK_PSEAE			>sp|Q9I5Y4|PGK_PSEAE Phosphoglycerate kinase OS=Pseudomonas aeruginosa (strain ATCC 15692 / PAO1 / 1C / PRS 101 / LMG 12228) GN=pgk PE=3 SV=1	1	1	1
tr|Q9HXJ2|Q9HXJ2_PSEAE	sp|Q9I5Z0|METK_PSEAE			>sp|Q9I5Z0|METK_PSEAE S-adenosylmethionine synthase OS=Pseudomonas aeruginosa (strain ATCC 15692 / PAO1 / 1C / PRS 101 / LMG 12228) GN=metK PE=3 SV=1	1	5	5
tr|Q9HXM5|Q9HXM5_PSEAE	sp|Q9I617|BIOF_PSEAE			>sp|Q9I617|BIOF_PSEAE 8-amino-7-oxononanoate synthase OS=Pseudomonas aeruginosa (strain ATCC 15692 / PAO1 / 1C / PRS 101 / LMG 12228) GN=bioF PE=3 SV=1	1	1	1
tr|Q9HXR8|Q9HXR8_PSEAE	sp|Q9I685|SAHH_PSEAE			>sp|Q9I685|SAHH_PSEAE Adenosylhomocysteinase OS=Pseudomonas aeruginosa (strain ATCC 15692 / PAO1 / 1C / PRS 101 / LMG 12228) GN=ahcY PE=3 SV=1	1	11	11
tr|Q9HXU8|Q9HXU8_PSEAE	sp|Q9I6M4|DAVT_PSEAE			>sp|Q9I6M4|DAVT_PSEAE 5-aminovalerate aminotransferase DavT OS=Pseudomonas aeruginosa (strain ATCC 15692 / PAO1 / 1C / PRS 101 / LMG 12228) GN=davT PE=1 SV=1	1	7	7
tr|Q9HY12|Q9HY12_PSEAE	sp|Q9I6M5|DAVD_PSEAE			>sp|Q9I6M5|DAVD_PSEAE Glutarate-semialdehyde dehydrogenase DavD OS=Pseudomonas aeruginosa (strain ATCC 15692 / PAO1 / 1C / PRS 101 / LMG 12228) GN=davD PE=1 SV=1	1	5	5
tr|Q9HY13|Q9HY13_PSEAE	sp|Q9I747|HCP1_PSEAE			>sp|Q9I747|HCP1_PSEAE Protein hcp1 OS=Pseudomonas aeruginosa (strain ATCC 15692 / PAO1 / 1C / PRS 101 / LMG 12228) GN=hcp1 PE=1 SV=1	1	3	3
tr|Q9HY77|Q9HY77_PSEAE	sp|Q9I7B8|SYGB_PSEAE			>sp|Q9I7B8|SYGB_PSEAE Glycine--tRNA ligase beta subunit OS=Pseudomonas aeruginosa (strain ATCC 15692 / PAO1 / 1C / PRS 101 / LMG 12228) GN=glyS PE=3 SV=1	1	1	1
tr|Q9HYJ0|Q9HYJ0_PSEAE	sp|Q9S508|PHZB2_PSEAE			>sp|Q9S508|PHZB2_PSEAE Phenazine biosynthesis protein PhzB 2 OS=Pseudomonas aeruginosa (strain ATCC 15692 / PAO1 / 1C / PRS 101 / LMG 12228) GN=phzB2 PE=1 SV=1	1	4	4
tr|Q9HYZ6|Q9HYZ6_PSEAE	sp|Q9X2T1|THIO_PSEAE			>sp|Q9X2T1|THIO_PSEAE Thioredoxin OS=Pseudomonas aeruginosa (strain ATCC 15692 / PAO1 / 1C / PRS 101 / LMG 12228) GN=trxA PE=3 SV=1	1	1	1
tr|Q9HZK4|Q9HZK4_PSEAE	sp|Q9X4G0|HGD_PSEAE			>sp|Q9X4G0|HGD_PSEAE Homogentisate 1,2-dioxygenase OS=Pseudomonas aeruginosa (strain ATCC 15692 / PAO1 / 1C / PRS 101 / LMG 12228) GN=hmgA PE=3 SV=2	1	2	2
tr|Q9I028|Q9I028_PSEAE	tr|G3XCZ9|G3XCZ9_PSEAE			>tr|G3XCZ9|G3XCZ9_PSEAE Poly(3-hydroxyalkanoic acid) synthase 2 OS=Pseudomonas aeruginosa (strain ATCC 15692 / PAO1 / 1C / PRS 101 / LMG 12228) GN=phaC2 PE=4 SV=1	1	1	1
tr|Q9I0L4|Q9I0L4_PSEAE	tr|Q9HTD1|Q9HTD1_PSEAE			>tr|Q9HTD1|Q9HTD1_PSEAE Probable transcarboxylase subunit OS=Pseudomonas aeruginosa (strain ATCC 15692 / PAO1 / 1C / PRS 101 / LMG 12228) GN=PA5435 PE=4 SV=1	1	29	29
tr|Q9I0L5|Q9I0L5_PSEAE;REV__tr|Q9HWT9|Q9HWT9_PSEAE	tr|Q9HTD9|Q9HTD9_PSEAE			>tr|Q9HTD9|Q9HTD9_PSEAE Alcohol dehydrogenase OS=Pseudomonas aeruginosa (strain ATCC 15692 / PAO1 / 1C / PRS 101 / LMG 12228) GN=adhA PE=1 SV=1	1	6	6
tr|Q9I0T1|Q9I0T1_PSEAE	tr|Q9HTP2|Q9HTP2_PSEAE			>tr|Q9HTP2|Q9HTP2_PSEAE Probable aldehyde dehydrogenase OS=Pseudomonas aeruginosa (strain ATCC 15692 / PAO1 / 1C / PRS 101 / LMG 12228) GN=PA5312 PE=3 SV=1	1	10	10
tr|Q9I0T2|Q9I0T2_PSEAE	tr|Q9HTR4|Q9HTR4_PSEAE			>tr|Q9HTR4|Q9HTR4_PSEAE Uncharacterized protein OS=Pseudomonas aeruginosa (strain ATCC 15692 / PAO1 / 1C / PRS 101 / LMG 12228) GN=PA5290 PE=4 SV=1	1	1	1
tr|Q9I0Z9|Q9I0Z9_PSEAE	tr|Q9HTU9|Q9HTU9_PSEAE			>tr|Q9HTU9|Q9HTU9_PSEAE Uncharacterized protein OS=Pseudomonas aeruginosa (strain ATCC 15692 / PAO1 / 1C / PRS 101 / LMG 12228) GN=PA5245 PE=4 SV=1	1	2	2
tr|Q9I1E7|Q9I1E7_PSEAE	tr|Q9HU11|Q9HU11_PSEAE			>tr|Q9HU11|Q9HU11_PSEAE Uncharacterized protein OS=Pseudomonas aeruginosa (strain ATCC 15692 / PAO1 / 1C / PRS 101 / LMG 12228) GN=PA5178 PE=4 SV=1	1	5	5
tr|Q9I1E8|Q9I1E8_PSEAE	tr|Q9HU24|Q9HU24_PSEAE			>tr|Q9HU24|Q9HU24_PSEAE dTDP-glucose 4,6-dehydratase OS=Pseudomonas aeruginosa (strain ATCC 15692 / PAO1 / 1C / PRS 101 / LMG 12228) GN=rmlB PE=3 SV=1	1	1	1
tr|Q9I1N7|Q9I1N7_PSEAE	tr|Q9HUC3|Q9HUC3_PSEAE			>tr|Q9HUC3|Q9HUC3_PSEAE Polyhydroxyalkanoate synthesis protein PhaF OS=Pseudomonas aeruginosa (strain ATCC 15692 / PAO1 / 1C / PRS 101 / LMG 12228) GN=phaF PE=4 SV=1	1	3	3
tr|Q9I1Y4|Q9I1Y4_PSEAE	tr|Q9HUD3|Q9HUD3_PSEAE			>tr|Q9HUD3|Q9HUD3_PSEAE Malic enzyme OS=Pseudomonas aeruginosa (strain ATCC 15692 / PAO1 / 1C / PRS 101 / LMG 12228) GN=PA5046 PE=4 SV=1	1	6	6
tr|Q9I297|Q9I297_PSEAE	tr|Q9HV54|Q9HV54_PSEAE			>tr|Q9HV54|Q9HV54_PSEAE Transcription termination/antitermination protein NusA OS=Pseudomonas aeruginosa (strain ATCC 15692 / PAO1 / 1C / PRS 101 / LMG 12228) GN=nusA PE=3 SV=1	1	1	1
tr|Q9I2A2|Q9I2A2_PSEAE	tr|Q9HVA0|Q9HVA0_PSEAE			>tr|Q9HVA0|Q9HVA0_PSEAE Acetolactate synthase OS=Pseudomonas aeruginosa (strain ATCC 15692 / PAO1 / 1C / PRS 101 / LMG 12228) GN=ilvI PE=3 SV=1	1	1	1
tr|Q9I2A6|Q9I2A6_PSEAE	tr|Q9HVF9|Q9HVF9_PSEAE			>tr|Q9HVF9|Q9HVF9_PSEAE Uncharacterized protein OS=Pseudomonas aeruginosa (strain ATCC 15692 / PAO1 / 1C / PRS 101 / LMG 12228) GN=PA4632 PE=3 SV=1	1	3	3
tr|Q9I2A9|Q9I2A9_PSEAE	tr|Q9HVJ1|Q9HVJ1_PSEAE			>tr|Q9HVJ1|Q9HVJ1_PSEAE Probable ATP-binding component of ABC transporter OS=Pseudomonas aeruginosa (strain ATCC 15692 / PAO1 / 1C / PRS 101 / LMG 12228) GN=PA4595 PE=4 SV=1	1	6	6
tr|Q9I2U9|Q9I2U9_PSEAE	tr|Q9HVY4|Q9HVY4_PSEAE			>tr|Q9HVY4|Q9HVY4_PSEAE Ubiquinol-cytochrome c reductase iron-sulfur subunit OS=Pseudomonas aeruginosa (strain ATCC 15692 / PAO1 / 1C / PRS 101 / LMG 12228) GN=PA4431 PE=4 SV=1	1	1	1
tr|Q9I2V3|Q9I2V3_PSEAE	tr|Q9HW32|Q9HW32_PSEAE			>tr|Q9HW32|Q9HW32_PSEAE Insulin-cleaving metalloproteinase outer membrane protein OS=Pseudomonas aeruginosa (strain ATCC 15692 / PAO1 / 1C / PRS 101 / LMG 12228) GN=icmP PE=4 SV=1	1	4	4
tr|Q9I2W9|Q9I2W9_PSEAE	tr|Q9HW49|Q9HW49_PSEAE			>tr|Q9HW49|Q9HW49_PSEAE Uncharacterized protein OS=Pseudomonas aeruginosa (strain ATCC 15692 / PAO1 / 1C / PRS 101 / LMG 12228) GN=PA4352 PE=3 SV=1	1	8	8
tr|Q9I2Z1|Q9I2Z1_PSEAE	tr|Q9HW86|Q9HW86_PSEAE			>tr|Q9HW86|Q9HW86_PSEAE MvaT OS=Pseudomonas aeruginosa (strain ATCC 15692 / PAO1 / 1C / PRS 101 / LMG 12228) GN=mvaT PE=1 SV=1	1	1	1
tr|Q9I3B2|Q9I3B2_PSEAE	tr|Q9HWG9|Q9HWG9_PSEAE			>tr|Q9HWG9|Q9HWG9_PSEAE Flavin-containing monooxygenase OS=Pseudomonas aeruginosa (strain ATCC 15692 / PAO1 / 1C / PRS 101 / LMG 12228) GN=phzS PE=1 SV=1	1	1	1
tr|Q9I3D4|Q9I3D4_PSEAE	tr|Q9HWK5|Q9HWK5_PSEAE			>tr|Q9HWK5|Q9HWK5_PSEAE Peptidylprolyl isomerase OS=Pseudomonas aeruginosa (strain ATCC 15692 / PAO1 / 1C / PRS 101 / LMG 12228) GN=ppiC2 PE=4 SV=1	1	2	2
tr|Q9I3G1|Q9I3G1_PSEAE	tr|Q9HWV0|Q9HWV0_PSEAE			>tr|Q9HWV0|Q9HWV0_PSEAE Probable nonribosomal peptide synthetase OS=Pseudomonas aeruginosa (strain ATCC 15692 / PAO1 / 1C / PRS 101 / LMG 12228) GN=PA4078 PE=4 SV=1	1	3	3
tr|Q9I400|Q9I400_PSEAE	tr|Q9I2C4|Q9I2C4_PSEAE;tr|Q9HX05|Q9HX05_PSEAE			>tr|Q9I2C4|Q9I2C4_PSEAE NAD+ dependent aldehyde dehydrogenase ExaC OS=Pseudomonas aeruginosa (strain ATCC 15692 / PAO1 / 1C / PRS 101 / LMG 12228) GN=exaC PE=3 SV=1;>tr|Q9HX05|Q9HX05_PSEAE Probable aldehyde dehydrogenase OS=Pseudomonas aeruginosa (strain A	2	3	3
tr|Q9I402|Q9I402_PSEAE	tr|Q9HX12|Q9HX12_PSEAE			>tr|Q9HX12|Q9HX12_PSEAE Uncharacterized protein OS=Pseudomonas aeruginosa (strain ATCC 15692 / PAO1 / 1C / PRS 101 / LMG 12228) GN=PA4015 PE=4 SV=1	1	1	1
tr|Q9I4I1|Q9I4I1_PSEAE	tr|Q9HXA5|Q9HXA5_PSEAE			>tr|Q9HXA5|Q9HXA5_PSEAE Uncharacterized protein OS=Pseudomonas aeruginosa (strain ATCC 15692 / PAO1 / 1C / PRS 101 / LMG 12228) GN=PA3908 PE=4 SV=1	1	1	1
tr|Q9I4X1|Q9I4X1_PSEAE	tr|Q9HXJ2|Q9HXJ2_PSEAE			>tr|Q9HXJ2|Q9HXJ2_PSEAE Type 4 fimbrial biogenesis protein PilF OS=Pseudomonas aeruginosa (strain ATCC 15692 / PAO1 / 1C / PRS 101 / LMG 12228) GN=pilF PE=1 SV=1	1	1	1
tr|Q9I5E3|Q9I5E3_PSEAE	tr|Q9HXM5|Q9HXM5_PSEAE			>tr|Q9HXM5|Q9HXM5_PSEAE Inosine-5-monophosphate dehydrogenase OS=Pseudomonas aeruginosa (strain ATCC 15692 / PAO1 / 1C / PRS 101 / LMG 12228) GN=guaB PE=1 SV=1	1	1	1
tr|Q9I5I4|Q9I5I4_PSEAE	tr|Q9HXR8|Q9HXR8_PSEAE			>tr|Q9HXR8|Q9HXR8_PSEAE Probable FMN oxidoreductase OS=Pseudomonas aeruginosa (strain ATCC 15692 / PAO1 / 1C / PRS 101 / LMG 12228) GN=PA3723 PE=4 SV=1	1	5	5
tr|Q9I5Y8|Q9I5Y8_PSEAE	tr|Q9HXU8|Q9HXU8_PSEAE			>tr|Q9HXU8|Q9HXU8_PSEAE Lipotoxon F, LptF OS=Pseudomonas aeruginosa (strain ATCC 15692 / PAO1 / 1C / PRS 101 / LMG 12228) GN=lptF PE=3 SV=1	1	1	1
tr|Q9I659|Q9I659_PSEAE	tr|Q9HY12|Q9HY12_PSEAE			>tr|Q9HY12|Q9HY12_PSEAE Uncharacterized protein OS=Pseudomonas aeruginosa (strain ATCC 15692 / PAO1 / 1C / PRS 101 / LMG 12228) GN=PA3614 PE=4 SV=1	1	2	2
tr|Q9I671|Q9I671_PSEAE	tr|Q9HY13|Q9HY13_PSEAE			>tr|Q9HY13|Q9HY13_PSEAE Uncharacterized protein OS=Pseudomonas aeruginosa (strain ATCC 15692 / PAO1 / 1C / PRS 101 / LMG 12228) GN=PA3613 PE=4 SV=1	1	3	3
tr|Q9I6A0|Q9I6A0_PSEAE	tr|Q9HY77|Q9HY77_PSEAE			>tr|Q9HY77|Q9HY77_PSEAE Glutaredoxin OS=Pseudomonas aeruginosa (strain ATCC 15692 / PAO1 / 1C / PRS 101 / LMG 12228) GN=PA3533 PE=3 SV=1	1	2	2
tr|Q9I6H5|Q9I6H5_PSEAE	tr|Q9HY81|Q9HY81_PSEAE			>tr|Q9HY81|Q9HY81_PSEAE Probable peroxidase OS=Pseudomonas aeruginosa (strain ATCC 15692 / PAO1 / 1C / PRS 101 / LMG 12228) GN=PA3529 PE=1 SV=1	1	7	7
	tr|Q9HYJ0|Q9HYJ0_PSEAE			>tr|Q9HYJ0|Q9HYJ0_PSEAE Probable dihydrolipoamide acetyltransferase OS=Pseudomonas aeruginosa (strain ATCC 15692 / PAO1 / 1C / PRS 101 / LMG 12228) GN=PA3415 PE=3 SV=1	1	1	1
	tr|Q9HYT5|Q9HYT5_PSEAE			>tr|Q9HYT5|Q9HYT5_PSEAE Uncharacterized protein OS=Pseudomonas aeruginosa (strain ATCC 15692 / PAO1 / 1C / PRS 101 / LMG 12228) GN=PA3309 PE=3 SV=1	1	7	7
	tr|Q9HYZ6|Q9HYZ6_PSEAE			>tr|Q9HYZ6|Q9HYZ6_PSEAE Site-determining protein OS=Pseudomonas aeruginosa (strain ATCC 15692 / PAO1 / 1C / PRS 101 / LMG 12228) GN=minD PE=3 SV=1	1	1	1
	tr|Q9HZK4|Q9HZK4_PSEAE			>tr|Q9HZK4|Q9HZK4_PSEAE Glyceraldehyde-3-phosphate dehydrogenase OS=Pseudomonas aeruginosa (strain ATCC 15692 / PAO1 / 1C / PRS 101 / LMG 12228) GN=PA3001 PE=3 SV=1	1	8	8
	tr|Q9I028|Q9I028_PSEAE			>tr|Q9I028|Q9I028_PSEAE Probable acyl-CoA dehydrogenase OS=Pseudomonas aeruginosa (strain ATCC 15692 / PAO1 / 1C / PRS 101 / LMG 12228) GN=PA2815 PE=4 SV=1	1	5	5
	tr|Q9I0L4|Q9I0L4_PSEAE			>tr|Q9I0L4|Q9I0L4_PSEAE Isocitrate dehydrogenase OS=Pseudomonas aeruginosa (strain ATCC 15692 / PAO1 / 1C / PRS 101 / LMG 12228) GN=idh PE=4 SV=1	1	4	4
	tr|Q9I0L5|Q9I0L5_PSEAE;REV__tr|Q9HWT9|Q9HWT9_PSEAE			>tr|Q9I0L5|Q9I0L5_PSEAE Isocitrate dehydrogenase [NADP] OS=Pseudomonas aeruginosa (strain ATCC 15692 / PAO1 / 1C / PRS 101 / LMG 12228) GN=icd PE=3 SV=1	2	14	14
	tr|Q9I0T1|Q9I0T1_PSEAE			>tr|Q9I0T1|Q9I0T1_PSEAE Probable acyl-CoA thiolase OS=Pseudomonas aeruginosa (strain ATCC 15692 / PAO1 / 1C / PRS 101 / LMG 12228) GN=PA2553 PE=3 SV=1	1	7	7
	tr|Q9I0T2|Q9I0T2_PSEAE			>tr|Q9I0T2|Q9I0T2_PSEAE Probable acyl-CoA dehydrogenase OS=Pseudomonas aeruginosa (strain ATCC 15692 / PAO1 / 1C / PRS 101 / LMG 12228) GN=PA2552 PE=3 SV=1	1	1	1
	tr|Q9I0Z9|Q9I0Z9_PSEAE			>tr|Q9I0Z9|Q9I0Z9_PSEAE Uncharacterized protein OS=Pseudomonas aeruginosa (strain ATCC 15692 / PAO1 / 1C / PRS 101 / LMG 12228) GN=PA2483 PE=4 SV=1	1	3	3
	tr|Q9I1E7|Q9I1E7_PSEAE			>tr|Q9I1E7|Q9I1E7_PSEAE Alkyl hydroperoxide reductase AhpD OS=Pseudomonas aeruginosa (strain ATCC 15692 / PAO1 / 1C / PRS 101 / LMG 12228) GN=PA2331 PE=3 SV=1	1	3	3
	tr|Q9I1E8|Q9I1E8_PSEAE			>tr|Q9I1E8|Q9I1E8_PSEAE Uncharacterized protein OS=Pseudomonas aeruginosa (strain ATCC 15692 / PAO1 / 1C / PRS 101 / LMG 12228) GN=PA2330 PE=4 SV=1	1	2	2
	tr|Q9I1N7|Q9I1N7_PSEAE			>tr|Q9I1N7|Q9I1N7_PSEAE PslB OS=Pseudomonas aeruginosa (strain ATCC 15692 / PAO1 / 1C / PRS 101 / LMG 12228) GN=pslB PE=3 SV=1	1	1	1
	tr|Q9I1Y4|Q9I1Y4_PSEAE			>tr|Q9I1Y4|Q9I1Y4_PSEAE Fimbrial subunit CupA4 OS=Pseudomonas aeruginosa (strain ATCC 15692 / PAO1 / 1C / PRS 101 / LMG 12228) GN=cupA4 PE=4 SV=1	1	1	1
	tr|Q9I246|Q9I246_PSEAE			>tr|Q9I246|Q9I246_PSEAE Probable carbamoyl transferase OS=Pseudomonas aeruginosa (strain ATCC 15692 / PAO1 / 1C / PRS 101 / LMG 12228) GN=PA2069 PE=4 SV=1	1	9	9
	tr|Q9I297|Q9I297_PSEAE			>tr|Q9I297|Q9I297_PSEAE Methylcrotonyl-CoA carboxylase, beta-subunit OS=Pseudomonas aeruginosa (strain ATCC 15692 / PAO1 / 1C / PRS 101 / LMG 12228) GN=liuB PE=1 SV=1	1	1	1
	tr|Q9I299|Q9I299_PSEAE			>tr|Q9I299|Q9I299_PSEAE Methylcrotonyl-CoA carboxylase, alpha-subunit (Biotin-containing) OS=Pseudomonas aeruginosa (strain ATCC 15692 / PAO1 / 1C / PRS 101 / LMG 12228) GN=liuD PE=1 SV=1	1	8	8
	tr|Q9I2A2|Q9I2A2_PSEAE			>tr|Q9I2A2|Q9I2A2_PSEAE Fumarylacetoacetase OS=Pseudomonas aeruginosa (strain ATCC 15692 / PAO1 / 1C / PRS 101 / LMG 12228) GN=fahA PE=4 SV=1	1	2	2
	tr|Q9I2A6|Q9I2A6_PSEAE			>tr|Q9I2A6|Q9I2A6_PSEAE 3-hydroxybutyrate dehydrogenase OS=Pseudomonas aeruginosa (strain ATCC 15692 / PAO1 / 1C / PRS 101 / LMG 12228) GN=bdhA PE=3 SV=1	1	1	1
	tr|Q9I2A9|Q9I2A9_PSEAE			>tr|Q9I2A9|Q9I2A9_PSEAE DhcB, dehydrocarnitine CoA transferase, subunit B OS=Pseudomonas aeruginosa (strain ATCC 15692 / PAO1 / 1C / PRS 101 / LMG 12228) GN=dhcB PE=4 SV=1	1	2	2
	tr|Q9I2U9|Q9I2U9_PSEAE			>tr|Q9I2U9|Q9I2U9_PSEAE Peptidyl-prolyl cis-trans isomerase OS=Pseudomonas aeruginosa (strain ATCC 15692 / PAO1 / 1C / PRS 101 / LMG 12228) GN=ppiB PE=3 SV=1	1	4	4
	tr|Q9I2V3|Q9I2V3_PSEAE			>tr|Q9I2V3|Q9I2V3_PSEAE Uncharacterized protein OS=Pseudomonas aeruginosa (strain ATCC 15692 / PAO1 / 1C / PRS 101 / LMG 12228) GN=PA1789 PE=1 SV=1	1	4	4
	tr|Q9I2W9|Q9I2W9_PSEAE			>tr|Q9I2W9|Q9I2W9_PSEAE Phosphoenolpyruvate synthase OS=Pseudomonas aeruginosa (strain ATCC 15692 / PAO1 / 1C / PRS 101 / LMG 12228) GN=ppsA PE=3 SV=1	1	4	4
	tr|Q9I2Z1|Q9I2Z1_PSEAE			>tr|Q9I2Z1|Q9I2Z1_PSEAE Uncharacterized protein OS=Pseudomonas aeruginosa (strain ATCC 15692 / PAO1 / 1C / PRS 101 / LMG 12228) GN=PA1746 PE=4 SV=1	1	1	1
	tr|Q9I3B2|Q9I3B2_PSEAE			>tr|Q9I3B2|Q9I3B2_PSEAE Beta-ketoacyl-ACP synthase I OS=Pseudomonas aeruginosa (strain ATCC 15692 / PAO1 / 1C / PRS 101 / LMG 12228) GN=fabB PE=3 SV=1	1	2	2
	tr|Q9I3D3|Q9I3D3_PSEAE			>tr|Q9I3D3|Q9I3D3_PSEAE 2-oxoglutarate dehydrogenase (E1 subunit) OS=Pseudomonas aeruginosa (strain ATCC 15692 / PAO1 / 1C / PRS 101 / LMG 12228) GN=sucA PE=4 SV=1	1	7	7
	tr|Q9I3D4|Q9I3D4_PSEAE			>tr|Q9I3D4|Q9I3D4_PSEAE Succinate dehydrogenase (B subunit) OS=Pseudomonas aeruginosa (strain ATCC 15692 / PAO1 / 1C / PRS 101 / LMG 12228) GN=sdhB PE=4 SV=1	1	4	4
	tr|Q9I3D5|Q9I3D5_PSEAE			>tr|Q9I3D5|Q9I3D5_PSEAE Succinate dehydrogenase flavoprotein subunit OS=Pseudomonas aeruginosa (strain ATCC 15692 / PAO1 / 1C / PRS 101 / LMG 12228) GN=sdhA PE=3 SV=1	1	12	12
	tr|Q9I3G1|Q9I3G1_PSEAE			>tr|Q9I3G1|Q9I3G1_PSEAE Cytochrome c oxidase, cbb3-type, CcoO subunit OS=Pseudomonas aeruginosa (strain ATCC 15692 / PAO1 / 1C / PRS 101 / LMG 12228) GN=ccoO2 PE=4 SV=1	1	1	1
	tr|Q9I400|Q9I400_PSEAE			>tr|Q9I400|Q9I400_PSEAE Probable short-chain dehydrogenase OS=Pseudomonas aeruginosa (strain ATCC 15692 / PAO1 / 1C / PRS 101 / LMG 12228) GN=PA1344 PE=4 SV=1	1	1	1
	tr|Q9I402|Q9I402_PSEAE			>tr|Q9I402|Q9I402_PSEAE Probable binding protein component of ABC transporter OS=Pseudomonas aeruginosa (strain ATCC 15692 / PAO1 / 1C / PRS 101 / LMG 12228) GN=PA1342 PE=4 SV=1	1	1	1
	tr|Q9I4I1|Q9I4I1_PSEAE			>tr|Q9I4I1|Q9I4I1_PSEAE Ribonucleoside-diphosphate reductase OS=Pseudomonas aeruginosa (strain ATCC 15692 / PAO1 / 1C / PRS 101 / LMG 12228) GN=nrdA PE=3 SV=1	1	2	2
	tr|Q9I4X1|Q9I4X1_PSEAE			>tr|Q9I4X1|Q9I4X1_PSEAE PqsC OS=Pseudomonas aeruginosa (strain ATCC 15692 / PAO1 / 1C / PRS 101 / LMG 12228) GN=pqsC PE=1 SV=1	1	1	1
	tr|Q9I5E3|Q9I5E3_PSEAE			>tr|Q9I5E3|Q9I5E3_PSEAE Citrate synthase OS=Pseudomonas aeruginosa (strain ATCC 15692 / PAO1 / 1C / PRS 101 / LMG 12228) GN=prpC PE=3 SV=1	1	2	2
	tr|Q9I5I4|Q9I5I4_PSEAE			>tr|Q9I5I4|Q9I5I4_PSEAE Probable enoyl-CoA hydratase/isomerase OS=Pseudomonas aeruginosa (strain ATCC 15692 / PAO1 / 1C / PRS 101 / LMG 12228) GN=PA0745 PE=3 SV=1	1	2	2
	tr|Q9I5U9|Q9I5U9_PSEAE			>tr|Q9I5U9|Q9I5U9_PSEAE Uncharacterized protein OS=Pseudomonas aeruginosa (strain ATCC 15692 / PAO1 / 1C / PRS 101 / LMG 12228) GN=PA0588 PE=4 SV=1	1	17	17
	tr|Q9I5Y8|Q9I5Y8_PSEAE			>tr|Q9I5Y8|Q9I5Y8_PSEAE Transketolase OS=Pseudomonas aeruginosa (strain ATCC 15692 / PAO1 / 1C / PRS 101 / LMG 12228) GN=tktA PE=1 SV=1	1	2	2
	tr|Q9I659|Q9I659_PSEAE			>tr|Q9I659|Q9I659_PSEAE Probable ClpA/B protease ATP binding subunit OS=Pseudomonas aeruginosa (strain ATCC 15692 / PAO1 / 1C / PRS 101 / LMG 12228) GN=PA0459 PE=4 SV=1	1	3	1
	tr|Q9I671|Q9I671_PSEAE			>tr|Q9I671|Q9I671_PSEAE Glutaryl-CoA dehydrogenase OS=Pseudomonas aeruginosa (strain ATCC 15692 / PAO1 / 1C / PRS 101 / LMG 12228) GN=gcdH PE=3 SV=1	1	8	8
	tr|Q9I6A0|Q9I6A0_PSEAE			>tr|Q9I6A0|Q9I6A0_PSEAE Probable cystathionine gamma-lyase OS=Pseudomonas aeruginosa (strain ATCC 15692 / PAO1 / 1C / PRS 101 / LMG 12228) GN=PA0400 PE=3 SV=1	1	1	1
	tr|Q9I6H5|Q9I6H5_PSEAE			>tr|Q9I6H5|Q9I6H5_PSEAE D-3-phosphoglycerate dehydrogenase OS=Pseudomonas aeruginosa (strain ATCC 15692 / PAO1 / 1C / PRS 101 / LMG 12228) GN=serA PE=3 SV=1	1	2	2
	tr|Q9I6Z3|Q9I6Z3_PSEAE			>tr|Q9I6Z3|Q9I6Z3_PSEAE Alkyl hydroperoxide reductase subunit C OS=Pseudomonas aeruginosa (strain ATCC 15692 / PAO1 / 1C / PRS 101 / LMG 12228) GN=ahpC PE=4 SV=1	1	8	8

## Sheet: 2-2 proteinGroups C4HSL-1
Protein IDs	Majority protein IDs	Peptide counts (all)	Peptide counts (razor+unique)	Peptide counts (unique)	Fasta headers	Number of proteins	Peptides	Razor + unique peptides	Unique peptides	Sequence coverage [%]	Unique + razor sequence coverage [%]	Unique sequence coverage [%]	Mol. weight [kDa]	Sequence length	Sequence lengths	Q-value	Score	Intensity	MS/MS Count	Only identified by site	Reverse	Potential contaminant	id	Peptide IDs	Peptide is razor	Mod. peptide IDs	Evidence IDs	MS/MS IDs	Best MS/MS	Oxidation (M) site IDs	Oxidation (M) site positions
CON__ENSEMBL:ENSBTAP00000038253	CON__ENSEMBL:ENSBTAP00000038253	5	1	0	>ENSEMBL:ENSBTAP00000038253 (Bos taurus) 63 kDa protein	1	5	1	0	8.4	1.5	0	63.165	606	606	1	-2	502390	1	+		+	0	77;138;180;492;527	True;False;False;False;False	82;147;190;518;554	140;248;249;313;314;903;984;985	301;471;472;580;581;582;583;584;1775;2028;2029	301;471;580;1775;2029	0	465
CON__P00761	CON__P00761	4	4	4	>P00761 SWISS-PROT:P00761|TRYP_PIG Trypsin - Sus scrofa (Pig).	1	4	4	4	25.1	25.1	25.1	24.409	231	231	0	120.15	1153200000	113			+	1	278;347;386;551	True;True;True;True	294;295;365;405;578	497;498;499;500;501;502;503;628;629;630;631;632;705;1020;1021	951;952;953;954;955;956;957;958;959;960;961;962;963;964;965;966;967;968;969;970;971;972;973;974;975;976;977;978;979;980;1210;1211;1212;1213;1214;1215;1216;1217;1218;1219;1220;1221;1222;1223;1224;1225;1226;1227;1228;1229;1230;1231;1232;1233;1234;1235;1236;1237;1238;1239;1240;1241;1242;1243;1244;1245;1246;1247;1248;1249;1250;1251;1252;1397;1398;1399;1400;1401;1402;1403;1404;1405;1406;1407;2075;2076…	966;1228;1398;2093	1	94
CON__P04264;CON__Q6IFZ6;CON__Q9R0H5;CON__Q6NXH9;CON__Q8BGZ7;CON__P50446;CON__Q7Z794	CON__P04264	12;2;1;1;1;1;1	12;2;1;1;1;1;1	5;0;0;0;0;0;0	>P04264 SWISS-PROT:P04264 Tax_Id=9606 Gene_Symbol=KRT1 Keratin, type II cytoskeletal 1	7	12	12	5	19.4	19.4	8.2	66.017	644	644;572;524;539;551;553;578	0	111.32	39128000	26			+	2	17;138;180;260;373;431;436;489;492;527;530;630	True;True;True;True;True;True;True;True;True;True;True;True	19;147;190;274;392;454;459;515;518;554;557;658	36;37;248;249;313;314;469;685;686;804;811;898;899;903;984;985;988;989;1178;1179	99;100;471;472;580;581;582;583;584;898;1367;1368;1622;1634;1766;1767;1768;1769;1770;1775;2028;2029;2032;2033;2424;2425	99;471;580;898;1368;1622;1634;1769;1775;2029;2032;2425	0;2;3	259;262;469
CON__P07477	CON__P07477	1	1	1	>P07477 SWISS-PROT:P07477 Tax_Id=9606 Gene_Symbol=PRSS1 Trypsin-1 precursor	1	1	1	1	8.1	8.1	8.1	26.558	247	247	0	6.5956	46194000	3			+	3	348	TRUE	366	633	1253;1254;1255	1254
CON__P13645;CON__P02535-1;CON__Q7Z3Z0;CON__Q7Z3Y8;CON__Q148H6;CON__Q7Z3Y7	CON__P13645	5;2;1;1;1;1	5;2;1;1;1;1	5;2;1;1;1;1	>P13645 SWISS-PROT:P13645 Tax_Id=9606 Gene_Symbol=KRT10 Keratin, type I cytoskeletal 10	6	5	5	5	8.4	8.4	8.4	59.51	593	593;570;450;459;464;486	0	33.933	8421400	11			+	4	52;99;340;499;581	True;True;True;True;True	56;105;357;526;608	92;93;179;612;613;923;924;1085	192;193;194;195;353;1181;1182;1183;1825;1826;2204	193;353;1181;1825;2204
CON__P35527	CON__P35527	1	1	1	>P35527 SWISS-PROT:P35527 Tax_Id=9606 Gene_Symbol=KRT9 Keratin, type I cytoskeletal 9	1	1	1	1	2.2	2.2	2.2	62.129	623	623	0	9.2095	886100	1			+	5	596	TRUE	623	1111	2260	2260
CON__P35908	CON__P35908	4	1	0	>P35908 SWISS-PROT:P35908 Tax_Id=9606 Gene_Symbol=KRT2 Keratin, type II cytoskeletal 2 epidermal	1	4	1	0	6.7	2.2	0	65.865	645	645	0	6.4838	171140	1			+	6	77;180;204;260	False;False;True;False	82;190;214;274	140;313;314;351;469	301;580;581;582;583;584;640;898	301;580;640;898
CON__Streptavidin	CON__Streptavidin	5	5	5	>Streptavidin (S.avidinii)	1	5	5	5	43.1	43.1	43.1	16.622	160	160	0	177	777800000	226			+	7	294;295;420;502;627	True;True;True;True;True	311;312;443;529;655	530;531;532;533;534;535;536;537;538;539;769;770;771;772;773;774;775;776;777;778;779;780;781;782;783;784;785;786;787;927;928;929;1159;1160;1161;1162;1163;1164;1165;1166;1167;1168;1169;1170;1171;1172;1173;1174;1175	1018;1019;1020;1021;1022;1023;1024;1025;1026;1027;1028;1029;1030;1031;1032;1033;1034;1035;1036;1037;1038;1039;1040;1041;1042;1043;1044;1045;1046;1047;1048;1049;1050;1051;1052;1053;1054;1055;1056;1057;1058;1059;1060;1061;1062;1527;1528;1529;1530;1531;1532;1533;1534;1535;1536;1537;1538;1539;1540;1541;1542;1543;1544;1545;1546;1547;1548;1549;1550;1551;1552;1553;1554;1555;1556;1557;1558;1559;1560;1561…	1050;1062;1528;1845;2357
REV__tr|Q9HZS7|Q9HZS7_PSEAE	REV__tr|Q9HZS7|Q9HZS7_PSEAE	1	1	1	>tr|Q9HZS7|Q9HZS7_PSEAE Probable chemotaxis transducer OS=Pseudomonas aeruginosa (strain ATCC 15692 / PAO1 / 1C / PRS 101 / LMG 12228) GN=PA2920 PE=4 SV=1	1	1	1	1	0	0	0	58.32	545	545	0.0066225	5.777	1362000	1		+		8	336	TRUE	353	608	1177	1177
sp|O52759|RS4_PSEAE	sp|O52759|RS4_PSEAE	2	2	2	>sp|O52759|RS4_PSEAE 30S ribosomal protein S4 OS=Pseudomonas aeruginosa (strain ATCC 15692 / PAO1 / 1C / PRS 101 / LMG 12228) GN=rpsD PE=3 SV=2	1	2	2	2	12.6	12.6	12.6	23.277	206	206	0	13.963	4487800	4				9	47;384	True;True	51;403	85;702;703	183;1393;1394;1395	183;1393
sp|O52760|RPOA_PSEAE	sp|O52760|RPOA_PSEAE	2	2	2	>sp|O52760|RPOA_PSEAE DNA-directed RNA polymerase subunit alpha OS=Pseudomonas aeruginosa (strain ATCC 15692 / PAO1 / 1C / PRS 101 / LMG 12228) GN=rpoA PE=3 SV=2	1	2	2	2	7.5	7.5	7.5	36.649	333	333	0	15.051	2058000	2				10	23;412	True;True	25;432	45;747	108;1486	108;1486
sp|O52762|CATA_PSEAE	sp|O52762|CATA_PSEAE	8	8	8	>sp|O52762|CATA_PSEAE Catalase OS=Pseudomonas aeruginosa (strain ATCC 15692 / PAO1 / 1C / PRS 101 / LMG 12228) GN=katA PE=1 SV=1	1	8	8	8	26.6	26.6	26.6	55.588	482	482	0	74.592	23605000	17				11	219;222;342;357;390;418;537;622	True;True;True;True;True;True;True;True	230;233;359;375;409;441;564;650	378;379;383;616;617;645;710;711;712;766;767;998;999;1000;1151	688;689;705;1186;1187;1188;1272;1415;1416;1417;1418;1523;1524;1525;2042;2043;2044;2347	689;705;1186;1272;1415;1523;2042;2347
sp|O54439|ACP1_PSEAE	sp|O54439|ACP1_PSEAE	2	2	2	>sp|O54439|ACP1_PSEAE Acyl carrier protein 1 OS=Pseudomonas aeruginosa (strain ATCC 15692 / PAO1 / 1C / PRS 101 / LMG 12228) GN=acpP1 PE=3 SV=4	1	2	2	2	32.1	32.1	32.1	8.7406	78	78	0	31.097	16277000	13				12	301;302	True;True	318;319	547;548;549;550;551	1070;1071;1072;1073;1074;1075;1076;1077;1078;1079;1080;1081;1082	1071;1082
sp|O68822|AMPA_PSEAE	sp|O68822|AMPA_PSEAE	1	1	1	>sp|O68822|AMPA_PSEAE Cytosol aminopeptidase OS=Pseudomonas aeruginosa (strain ATCC 15692 / PAO1 / 1C / PRS 101 / LMG 12228) GN=pepA PE=3 SV=1	1	1	1	1	3	3	3	52.331	495	495	0	6.1248	717220	1				13	90	TRUE	96	166	336	336
sp|O69753|PHZB1_PSEAE	sp|O69753|PHZB1_PSEAE	2	1	1	>sp|O69753|PHZB1_PSEAE Phenazine biosynthesis protein PhzB 1 OS=Pseudomonas aeruginosa (strain ATCC 15692 / PAO1 / 1C / PRS 101 / LMG 12228) GN=phzB1 PE=3 SV=1	1	2	1	1	16	9.9	9.9	18.888	162	162	0	7.9873	1317500	2				14	62;447	False;True	66;472	108;109;831	217;218;219;220;1661;1662	217;1662
sp|O69754|PHZF_PSEAE	sp|O69754|PHZF_PSEAE	2	2	2	>sp|O69754|PHZF_PSEAE Trans-2,3-dihydro-3-hydroxyanthranilate isomerase OS=Pseudomonas aeruginosa (strain ATCC 15692 / PAO1 / 1C / PRS 101 / LMG 12228) GN=phzF1 PE=3 SV=2	1	2	2	2	16.9	16.9	16.9	30.342	278	278	0	13.439	2520600	2				15	265;603	True;True	281;631	479;1124	932;2307	932;2307
sp|O82850|RS2_PSEAE	sp|O82850|RS2_PSEAE	1	1	1	>sp|O82850|RS2_PSEAE 30S ribosomal protein S2 OS=Pseudomonas aeruginosa (strain ATCC 15692 / PAO1 / 1C / PRS 101 / LMG 12228) GN=rpsB PE=3 SV=2	1	1	1	1	5.3	5.3	5.3	27.336	246	246	0	5.8506	453940	1				16	114	TRUE	120	205	392	392
sp|O82851|EFTS_PSEAE	sp|O82851|EFTS_PSEAE	2	2	2	>sp|O82851|EFTS_PSEAE Elongation factor Ts OS=Pseudomonas aeruginosa (strain ATCC 15692 / PAO1 / 1C / PRS 101 / LMG 12228) GN=tsf PE=3 SV=1	1	2	2	2	8	8	8	30.653	289	289	0	11.206	4762600	4				17	19;248	True;True	21;260	39;443;444	102;848;849;850	102;848
sp|P04739|FMPO_PSEAE	sp|P04739|FMPO_PSEAE	1	1	1	>sp|P04739|FMPO_PSEAE Fimbrial protein OS=Pseudomonas aeruginosa (strain ATCC 15692 / PAO1 / 1C / PRS 101 / LMG 12228) GN=pilA PE=1 SV=1	1	1	1	1	14.1	14.1	14.1	15.512	149	149	0	6.806	509210	2				18	271	TRUE	287	486	939;940	939
sp|P05384|DBHB_PSEAE	sp|P05384|DBHB_PSEAE	2	2	2	>sp|P05384|DBHB_PSEAE DNA-binding protein HU-beta OS=Pseudomonas aeruginosa (strain ATCC 15692 / PAO1 / 1C / PRS 101 / LMG 12228) GN=hupB PE=1 SV=3	1	2	2	2	32.2	32.2	32.2	9.0865	90	90	0	20.219	18844000	8				19	50;477	True;True	54;503	89;90;884;885	187;188;189;190;1749;1750;1751;1752	190;1750
sp|P08308|OTCC_PSEAE	sp|P08308|OTCC_PSEAE	13	13	13	>sp|P08308|OTCC_PSEAE Ornithine carbamoyltransferase, catabolic OS=Pseudomonas aeruginosa (strain ATCC 15692 / PAO1 / 1C / PRS 101 / LMG 12228) GN=arcB PE=1 SV=3	1	13	13	13	50.9	50.9	50.9	38.108	336	336	0	92.172	70824000	39				20	153;160;172;202;230;280;388;389;417;428;437;456;458	True;True;True;True;True;True;True;True;True;True;True;True;True	162;169;170;182;212;242;297;407;408;439;440;451;460;461;481;483	275;284;285;301;302;349;411;412;506;507;708;709;763;764;765;799;800;812;813;814;846;847;849;850	517;526;527;528;556;557;558;559;560;561;562;563;564;638;790;791;792;793;983;984;985;1413;1414;1518;1519;1520;1521;1522;1616;1617;1618;1635;1636;1637;1638;1687;1688;1690;1691	517;528;556;638;790;983;1413;1414;1519;1618;1635;1687;1690	4;5;6	101;169;261
sp|P09591|EFTU_PSEAE	sp|P09591|EFTU_PSEAE	13	13	13	>sp|P09591|EFTU_PSEAE Elongation factor Tu OS=Pseudomonas aeruginosa (strain ATCC 15692 / PAO1 / 1C / PRS 101 / LMG 12228) GN=tufA PE=1 SV=2	1	13	13	13	46.9	46.9	46.9	43.369	397	397	0	186.77	366360000	132				21	16;28;34;43;104;116;215;239;392;414;464;541;597	True;True;True;True;True;True;True;True;True;True;True;True;True	16;17;18;30;37;46;47;110;122;123;226;251;411;434;435;436;489;568;624	29;30;31;32;33;34;35;52;53;62;63;76;77;78;79;189;190;208;209;210;211;369;370;371;372;427;428;714;715;716;750;751;752;753;754;755;756;757;858;859;1007;1008;1112;1113	78;79;80;81;82;83;84;85;86;87;88;89;90;91;92;93;94;95;96;97;98;116;117;118;134;135;136;137;138;139;140;141;142;143;144;145;166;167;168;169;170;171;172;173;174;175;176;370;371;396;397;398;399;400;401;402;403;404;405;406;407;408;409;410;664;665;666;667;668;669;670;671;672;673;674;675;676;815;816;817;1420;1421;1422;1423;1424;1425;1426;1427;1428;1429;1430;1431;1490;1491;1492;1493;1494;1495;1496;1497;…	86;116;140;166;370;403;667;817;1421;1500;1703;2055;2268	7;8;9;10;11;12	140;152;177;216;362;372
sp|P11221|OPRI_PSEAE	sp|P11221|OPRI_PSEAE	2	2	2	>sp|P11221|OPRI_PSEAE Major outer membrane lipoprotein OS=Pseudomonas aeruginosa (strain ATCC 15692 / PAO1 / 1C / PRS 101 / LMG 12228) GN=oprI PE=3 SV=1	1	2	2	2	25.3	25.3	25.3	8.8348	83	83	0	14.211	2877900	6				22	311;387	True;True	328;406	565;706;707	1098;1408;1409;1410;1411;1412	1098;1408
sp|P13794|PORF_PSEAE	sp|P13794|PORF_PSEAE	4	4	4	>sp|P13794|PORF_PSEAE Outer membrane porin F OS=Pseudomonas aeruginosa (strain ATCC 15692 / PAO1 / 1C / PRS 101 / LMG 12228) GN=oprF PE=1 SV=1	1	4	4	4	19.7	19.7	19.7	37.639	350	350	0	34.171	16764000	12				23	133;466;470;586	True;True;True;True	142;491;495;613	240;241;861;862;869;870;1092;1093	461;462;463;464;1706;1707;1716;1717;1718;1719;2212;2213	464;1706;1717;2212
sp|P13981|ARCA_PSEAE	sp|P13981|ARCA_PSEAE	19	19	19	>sp|P13981|ARCA_PSEAE Arginine deiminase OS=Pseudomonas aeruginosa (strain ATCC 15692 / PAO1 / 1C / PRS 101 / LMG 12228) GN=arcA PE=1 SV=2	1	19	19	19	51.7	51.7	51.7	46.435	418	418	0	255.5	246160000	116				24	37;111;120;156;169;212;299;312;316;317;325;444;451;469;509;518;519;577;614	True;True;True;True;True;True;True;True;True;True;True;True;True;True;True;True;True;True;True	40;117;127;165;179;222;223;316;329;333;334;342;469;476;494;536;545;546;604;642	69;70;198;199;216;217;278;296;297;363;364;365;543;544;566;567;572;573;574;575;591;592;825;826;836;837;865;866;867;868;941;942;964;965;966;967;968;969;970;1078;1138;1139	156;157;158;159;160;382;383;384;385;386;415;416;417;418;419;420;520;543;544;545;546;547;548;549;550;654;655;656;657;658;659;660;1066;1067;1099;1100;1101;1108;1109;1110;1111;1112;1156;1157;1158;1652;1653;1654;1669;1670;1671;1672;1673;1674;1710;1711;1712;1713;1714;1715;1893;1894;1895;1896;1897;1898;1899;1964;1965;1966;1967;1968;1969;1970;1971;1972;1973;1974;1975;1976;1977;1978;1979;1980;1981;1982;1…	156;386;419;520;546;654;1066;1100;1109;1111;1156;1653;1669;1710;1897;1965;1995;2190;2325	13	72
sp|P13982|ARCC_PSEAE	sp|P13982|ARCC_PSEAE	4	4	4	>sp|P13982|ARCC_PSEAE Carbamate kinase OS=Pseudomonas aeruginosa (strain ATCC 15692 / PAO1 / 1C / PRS 101 / LMG 12228) GN=arcC PE=3 SV=1	1	4	4	4	16.8	16.8	16.8	33.08	310	310	0	22.89	6296200	4				25	41;102;307;350	True;True;True;True	44;108;324;368	74;185;559;560;635;636	164;359;1092;1093;1257;1258	164;359;1093;1258
sp|P14165|CISY_PSEAE	sp|P14165|CISY_PSEAE	2	2	2	>sp|P14165|CISY_PSEAE Citrate synthase OS=Pseudomonas aeruginosa (strain ATCC 15692 / PAO1 / 1C / PRS 101 / LMG 12228) GN=gltA PE=3 SV=2	1	2	2	2	4	4	4	47.694	428	428	0	13.372	1378300	2				26	404;405	True;True	424;425	735;736	1472;1473	1472;1473
sp|P28810|MMSA_PSEAE	sp|P28810|MMSA_PSEAE	2	2	2	>sp|P28810|MMSA_PSEAE Methylmalonate-semialdehyde dehydrogenase [acylating] OS=Pseudomonas aeruginosa (strain ATCC 15692 / PAO1 / 1C / PRS 101 / LMG 12228) GN=mmsA PE=1 SV=2	1	2	2	2	7.8	7.8	7.8	53.663	497	497	0	15.894	1301400	2				27	361;601	True;True	379;629	668;1122	1338;2305	1338;2305
sp|P30718|CH60_PSEAE	sp|P30718|CH60_PSEAE	19	19	19	>sp|P30718|CH60_PSEAE 60 kDa chaperonin OS=Pseudomonas aeruginosa (strain ATCC 15692 / PAO1 / 1C / PRS 101 / LMG 12228) GN=groL PE=1 SV=3	1	19	19	19	51.7	51.7	51.7	57.085	547	547	0	178.85	104430000	68				28	6;36;42;60;66;67;87;88;113;164;166;195;326;409;448;459;460;555;561	True;True;True;True;True;True;True;True;True;True;True;True;True;True;True;True;True;True;True	6;39;45;64;71;72;93;94;119;174;176;205;343;429;473;484;485;582;588	12;13;65;66;67;68;75;104;119;120;121;122;123;124;125;161;162;163;164;201;202;203;204;290;291;293;339;593;742;743;832;833;851;852;853;1043;1052;1053	32;33;34;35;36;37;38;147;148;149;150;151;152;153;154;155;165;212;251;252;253;254;255;256;257;258;259;260;261;262;263;264;265;266;267;268;269;270;329;330;331;332;333;334;388;389;390;391;533;534;535;536;538;539;626;1159;1480;1481;1482;1663;1664;1665;1692;1693;1694;1695;2126;2139;2140;2141;2142	36;148;165;212;257;263;330;332;388;534;539;626;1159;1480;1665;1692;1693;2126;2141
sp|P31961|EDD_PSEAE	sp|P31961|EDD_PSEAE	1	1	1	>sp|P31961|EDD_PSEAE Phosphogluconate dehydratase OS=Pseudomonas aeruginosa (strain ATCC 15692 / PAO1 / 1C / PRS 101 / LMG 12228) GN=edd PE=3 SV=3	1	1	1	1	2.6	2.6	2.6	65.182	608	608	0	6.0397	340160	1				29	602	TRUE	630	1123	2306	2306
sp|P37798|ACCC_PSEAE	sp|P37798|ACCC_PSEAE	3	3	3	>sp|P37798|ACCC_PSEAE Biotin carboxylase OS=Pseudomonas aeruginosa (strain ATCC 15692 / PAO1 / 1C / PRS 101 / LMG 12228) GN=accC PE=1 SV=1	1	3	3	3	8.7	8.7	8.7	48.887	449	449	0	22.565	7865000	8				30	421;572;576	True;True;True	444;599;603	788;789;1071;1072;1077	1599;1600;2174;2175;2176;2177;2178;2188	1599;2176;2188
sp|P37799|BCCP_PSEAE	sp|P37799|BCCP_PSEAE	5	5	5	>sp|P37799|BCCP_PSEAE Biotin carboxyl carrier protein of acetyl-CoA carboxylase OS=Pseudomonas aeruginosa (strain ATCC 15692 / PAO1 / 1C / PRS 101 / LMG 12228) GN=accB PE=3 SV=1	1	5	5	5	53.2	53.2	53.2	16.455	156	156	0	164.43	1039900000	198				31	5;318;360;496;511	True;True;True;True;True	5;335;378;522;523;538	9;10;11;576;577;578;579;580;581;582;583;648;649;650;651;652;653;654;655;656;657;658;659;660;661;662;663;664;665;666;667;907;908;909;910;911;912;913;914;915;916;917;918;919;945;946;947;948;949;950;951	11;12;13;14;15;16;17;18;19;20;21;22;23;24;25;26;27;28;29;30;31;1113;1114;1115;1116;1117;1118;1119;1120;1121;1122;1123;1124;1125;1126;1127;1128;1129;1130;1131;1132;1133;1134;1135;1136;1137;1138;1139;1140;1141;1142;1143;1144;1275;1276;1277;1278;1279;1280;1281;1282;1283;1284;1285;1286;1287;1288;1289;1290;1291;1292;1293;1294;1295;1296;1297;1298;1299;1300;1301;1302;1303;1304;1305;1306;1307;1308;1309;1…	16;1116;1277;1796;1928	14	87
sp|P43336|PHHC_PSEAE	sp|P43336|PHHC_PSEAE	6	6	6	>sp|P43336|PHHC_PSEAE Aromatic-amino-acid aminotransferase OS=Pseudomonas aeruginosa (strain ATCC 15692 / PAO1 / 1C / PRS 101 / LMG 12228) GN=phhC PE=3 SV=2	1	6	6	6	24.1	24.1	24.1	43.273	399	399	0	37.707	8066600	8				32	9;270;324;434;592;607	True;True;True;True;True;True	9;286;341;457;619;635	17;18;484;485;590;809;1105;1128	50;51;937;938;1155;1632;2254;2312	51;937;1155;1632;2254;2312
sp|P47204|FTSZ_PSEAE	sp|P47204|FTSZ_PSEAE	1	1	1	>sp|P47204|FTSZ_PSEAE Cell division protein FtsZ OS=Pseudomonas aeruginosa (strain ATCC 15692 / PAO1 / 1C / PRS 101 / LMG 12228) GN=ftsZ PE=1 SV=2	1	1	1	1	4.8	4.8	4.8	41.218	394	394	0	8.1523	451790	1				33	612	TRUE	640	1135	2321	2321
sp|P53593|SUCC_PSEAE	sp|P53593|SUCC_PSEAE	10	10	10	>sp|P53593|SUCC_PSEAE Succinyl-CoA ligase [ADP-forming] subunit beta OS=Pseudomonas aeruginosa (strain ATCC 15692 / PAO1 / 1C / PRS 101 / LMG 12228) GN=sucC PE=3 SV=2	1	10	10	10	35.1	35.1	35.1	41.542	388	388	0	132.86	61747000	38				34	27;84;93;157;291;339;343;433;462;579	True;True;True;True;True;True;True;True;True;True	29;90;99;166;308;356;360;456;487;606	50;51;153;170;171;279;280;525;526;611;618;619;807;808;856;1080;1081;1082;1083	114;115;319;320;340;341;342;343;521;522;1010;1011;1012;1013;1014;1180;1189;1190;1191;1192;1625;1626;1627;1628;1629;1630;1631;1699;2192;2193;2194;2195;2196;2197;2198;2199;2200;2201	114;320;340;521;1010;1180;1190;1626;1699;2194
sp|P53641|SODF_PSEAE	sp|P53641|SODF_PSEAE	3	3	3	>sp|P53641|SODF_PSEAE Superoxide dismutase [Fe] OS=Pseudomonas aeruginosa (strain ATCC 15692 / PAO1 / 1C / PRS 101 / LMG 12228) GN=sodB PE=3 SV=3	1	3	3	3	21.8	21.8	21.8	21.351	193	193	0	25.482	23180000	14				35	29;539;640	True;True;True	31;566;668	54;55;1003;1004;1196;1197	119;120;121;122;123;2047;2048;2049;2050;2051;2052;2463;2464;2465	119;2050;2465
sp|P72173|AAT_PSEAE	sp|P72173|AAT_PSEAE	3	3	3	>sp|P72173|AAT_PSEAE Aspartate aminotransferase OS=Pseudomonas aeruginosa (strain ATCC 15692 / PAO1 / 1C / PRS 101 / LMG 12228) GN=aspC PE=3 SV=2	1	3	3	3	9.5	9.5	9.5	43.319	398	398	0	17.736	1832000	3				36	329;617;641	True;True;True	346;645;669	596;1142;1143;1198	1162;2335;2336;2466	1162;2335;2466
sp|Q51344|DHAS_PSEAE	sp|Q51344|DHAS_PSEAE	1	1	1	>sp|Q51344|DHAS_PSEAE Aspartate-semialdehyde dehydrogenase OS=Pseudomonas aeruginosa (strain ATCC 15692 / PAO1 / 1C / PRS 101 / LMG 12228) GN=asd PE=1 SV=2	1	1	1	1	3	3	3	40.494	370	370	0	5.8623	0	1				37	571	TRUE	598	1070	2173	2173
sp|Q51561|RPOB_PSEAE	sp|Q51561|RPOB_PSEAE	11	11	11	>sp|Q51561|RPOB_PSEAE DNA-directed RNA polymerase subunit beta OS=Pseudomonas aeruginosa (strain ATCC 15692 / PAO1 / 1C / PRS 101 / LMG 12228) GN=rpoB PE=3 SV=2	1	11	11	11	12.2	12.2	12.2	150.84	1357	1357	0	72.341	13192000	13				38	39;56;70;199;209;305;323;385;411;465;516	True;True;True;True;True;True;True;True;True;True;True	42;60;75;209;219;322;340;404;431;490;543	72;99;129;130;345;359;556;557;589;704;746;860;961	162;204;205;274;275;276;634;649;1089;1090;1154;1396;1485;1705;1960	162;205;274;634;649;1089;1154;1396;1485;1705;1960
sp|Q51567|SUCD_PSEAE	sp|Q51567|SUCD_PSEAE	9	9	9	>sp|Q51567|SUCD_PSEAE Succinyl-CoA ligase [ADP-forming] subunit alpha OS=Pseudomonas aeruginosa (strain ATCC 15692 / PAO1 / 1C / PRS 101 / LMG 12228) GN=sucD PE=3 SV=2	1	9	9	9	40.3	40.3	40.3	30.266	295	295	0	61.253	46434000	23				39	49;129;170;207;224;268;344;402;483	True;True;True;True;True;True;True;True;True	53;138;180;217;235;284;361;362;422;509	87;88;235;236;298;299;355;356;385;482;620;621;622;733;892	185;186;453;454;455;456;457;551;552;553;554;645;646;707;935;1193;1194;1195;1196;1197;1198;1470;1759	185;453;551;645;707;935;1193;1470;1759	15	206
sp|Q59636|NDK_PSEAE	sp|Q59636|NDK_PSEAE	2	2	2	>sp|Q59636|NDK_PSEAE Nucleoside diphosphate kinase OS=Pseudomonas aeruginosa (strain ATCC 15692 / PAO1 / 1C / PRS 101 / LMG 12228) GN=ndk PE=3 SV=2	1	2	2	2	22.4	22.4	22.4	15.592	143	143	0	11.991	4590800	3				40	11;445	True;True	11;470	20;827;828	53;1655;1656	53;1655
sp|Q59637|ODP1_PSEAE	sp|Q59637|ODP1_PSEAE	6	6	6	>sp|Q59637|ODP1_PSEAE Pyruvate dehydrogenase E1 component OS=Pseudomonas aeruginosa (strain ATCC 15692 / PAO1 / 1C / PRS 101 / LMG 12228) GN=aceE PE=3 SV=2	1	6	6	6	7.5	7.5	7.5	99.563	882	882	0	36.015	10431000	6				41	130;152;155;266;276;298	True;True;True;True;True;True	139;161;164;282;292;315	237;273;274;277;480;493;494;542	458;515;516;519;933;947;948;1065	458;515;519;933;947;1065
sp|Q59638|ODP2_PSEAE	sp|Q59638|ODP2_PSEAE	5	5	5	>sp|Q59638|ODP2_PSEAE Dihydrolipoyllysine-residue acetyltransferase component of pyruvate dehydrogenase complex OS=Pseudomonas aeruginosa (strain ATCC 15692 / PAO1 / 1C / PRS 101 / LMG 12228) GN=aceF PE=2 SV=2	1	5	5	5	16.5	16.5	16.5	56.708	547	547	0	36.857	7031200	6				42	161;349;364;491;562	True;True;True;True;True	171;367;382;517;589	286;634;671;902;1054;1055	529;1256;1342;1774;2143;2144	529;1256;1342;1774;2143
sp|Q9HT16|ATPF_PSEAE	sp|Q9HT16|ATPF_PSEAE	1	1	1	>sp|Q9HT16|ATPF_PSEAE ATP synthase subunit b OS=Pseudomonas aeruginosa (strain ATCC 15692 / PAO1 / 1C / PRS 101 / LMG 12228) GN=atpF PE=3 SV=1	1	1	1	1	8.3	8.3	8.3	16.956	156	156	0	7.5696	656680	1				43	76	TRUE	81	139	300	300
sp|Q9HT18|ATPA_PSEAE	sp|Q9HT18|ATPA_PSEAE	11	11	11	>sp|Q9HT18|ATPA_PSEAE ATP synthase subunit alpha OS=Pseudomonas aeruginosa (strain ATCC 15692 / PAO1 / 1C / PRS 101 / LMG 12228) GN=atpA PE=3 SV=1	1	11	11	11	25.1	25.1	25.1	55.393	514	514	0	91.688	52805000	24				44	145;194;203;283;424;504;505;512;568;605;611	True;True;True;True;True;True;True;True;True;True;True	154;204;213;300;447;531;532;539;595;633;639	261;337;338;350;511;512;793;794;932;933;934;952;953;1066;1067;1126;1133;1134	496;623;624;625;639;989;990;991;1606;1607;1608;1609;1878;1879;1880;1946;1947;2169;2170;2310;2317;2318;2319;2320	496;623;639;989;1606;1878;1880;1946;2170;2310;2318
sp|Q9HT20|ATPB_PSEAE	sp|Q9HT20|ATPB_PSEAE	10	10	10	>sp|Q9HT20|ATPB_PSEAE ATP synthase subunit beta OS=Pseudomonas aeruginosa (strain ATCC 15692 / PAO1 / 1C / PRS 101 / LMG 12228) GN=atpD PE=3 SV=1	1	10	10	10	33	33	33	49.499	458	458	0	72.211	17232000	11				45	112;132;143;289;461;485;549;550;566;638	True;True;True;True;True;True;True;True;True;True	118;141;152;306;486;511;576;577;593;666	200;239;259;522;854;855;894;1018;1019;1063;1193;1194	387;460;494;1006;1696;1697;1698;1761;2073;2074;2166;2460;2461	387;460;494;1006;1697;1761;2073;2074;2166;2460
sp|Q9HT21|ATPE_PSEAE	sp|Q9HT21|ATPE_PSEAE	1	1	1	>sp|Q9HT21|ATPE_PSEAE ATP synthase epsilon chain OS=Pseudomonas aeruginosa (strain ATCC 15692 / PAO1 / 1C / PRS 101 / LMG 12228) GN=atpC PE=3 SV=1	1	1	1	1	9.9	9.9	9.9	14.726	141	141	0	6.0746	714260	1				46	32	TRUE	35	60	131	131
sp|Q9HT95|ATSE4_PSEAE	sp|Q9HT95|ATSE4_PSEAE	2	2	2	>sp|Q9HT95|ATSE4_PSEAE Acetyltransferase PA5475 OS=Pseudomonas aeruginosa (strain ATCC 15692 / PAO1 / 1C / PRS 101 / LMG 12228) GN=PA5475 PE=3 SV=1	1	2	2	2	11.8	11.8	11.8	21	186	186	0	11.611	908740	3				47	123;463	True;True	131;488	224;225;857	439;440;1700	439;1700
sp|Q9HTD7|ASPA_PSEAE	sp|Q9HTD7|ASPA_PSEAE	2	2	2	>sp|Q9HTD7|ASPA_PSEAE Aspartate ammonia-lyase OS=Pseudomonas aeruginosa (strain ATCC 15692 / PAO1 / 1C / PRS 101 / LMG 12228) GN=aspA PE=3 SV=1	1	2	2	2	10.8	10.8	10.8	51.069	474	474	0	11.647	1405400	2				48	536;635	True;True	563;663	997;1189	2041;2456	2041;2456
sp|Q9HTN8|RL28_PSEAE	sp|Q9HTN8|RL28_PSEAE	1	1	1	>sp|Q9HTN8|RL28_PSEAE 50S ribosomal protein L28 OS=Pseudomonas aeruginosa (strain ATCC 15692 / PAO1 / 1C / PRS 101 / LMG 12228) GN=rpmB PE=3 SV=1	1	1	1	1	12.8	12.8	12.8	9.0655	78	78	0	7.3327	3376200	2				49	213	TRUE	224	366;367	661;662	662
sp|Q9HU65|GLNA_PSEAE	sp|Q9HU65|GLNA_PSEAE	4	4	4	>sp|Q9HU65|GLNA_PSEAE Glutamine synthetase OS=Pseudomonas aeruginosa (strain ATCC 15692 / PAO1 / 1C / PRS 101 / LMG 12228) GN=glnA PE=1 SV=1	1	4	4	4	15.6	15.6	15.6	51.944	469	469	0	28.389	4885800	9				50	59;101;443;501	True;True;True;True	63;107;468;528	102;103;184;823;824;926	209;210;211;358;1648;1649;1650;1651;1828	211;358;1650;1828
sp|Q9HUC8|SYR_PSEAE	sp|Q9HUC8|SYR_PSEAE	1	1	1	>sp|Q9HUC8|SYR_PSEAE Arginine--tRNA ligase OS=Pseudomonas aeruginosa (strain ATCC 15692 / PAO1 / 1C / PRS 101 / LMG 12228) GN=argS PE=3 SV=1	1	1	1	1	2	2	2	65.199	587	587	0	7.3837	716970	1				51	525	TRUE	552	981	2025	2025
sp|Q9HUM6|PURA_PSEAE	sp|Q9HUM6|PURA_PSEAE	2	2	2	>sp|Q9HUM6|PURA_PSEAE Adenylosuccinate synthetase OS=Pseudomonas aeruginosa (strain ATCC 15692 / PAO1 / 1C / PRS 101 / LMG 12228) GN=purA PE=3 SV=1	1	2	2	2	5.6	5.6	5.6	46.814	430	430	0	12.749	2197200	2				52	304;524	True;True	321;551	554;555;979;980	1087;1088;2023;2024	1087;2023
sp|Q9HUM9|RS6_PSEAE	sp|Q9HUM9|RS6_PSEAE	1	1	1	>sp|Q9HUM9|RS6_PSEAE 30S ribosomal protein S6 OS=Pseudomonas aeruginosa (strain ATCC 15692 / PAO1 / 1C / PRS 101 / LMG 12228) GN=rpsF PE=3 SV=1	1	1	1	1	7.2	7.2	7.2	16.164	139	139	0	6.3412	1076700	1				53	48	TRUE	52	86	184	184
sp|Q9HV43|DNAK_PSEAE	sp|Q9HV43|DNAK_PSEAE	10	10	10	>sp|Q9HV43|DNAK_PSEAE Chaperone protein DnaK OS=Pseudomonas aeruginosa (strain ATCC 15692 / PAO1 / 1C / PRS 101 / LMG 12228) GN=dnaK PE=3 SV=1	1	10	10	10	22.8	22.8	22.8	68.402	637	637	0	75.813	25042000	20				54	0;54;83;313;359;410;416;442;454;467	True;True;True;True;True;True;True;True;True;True	0;58;89;330;377;430;438;467;479;492	0;1;95;96;151;152;568;647;744;745;759;760;761;762;822;843;863	0;1;197;198;316;317;318;1102;1103;1274;1483;1484;1513;1514;1515;1516;1517;1647;1684;1708	0;197;317;1102;1274;1483;1515;1647;1684;1708
sp|Q9HV55|IF2_PSEAE	sp|Q9HV55|IF2_PSEAE	3	3	3	>sp|Q9HV55|IF2_PSEAE Translation initiation factor IF-2 OS=Pseudomonas aeruginosa (strain ATCC 15692 / PAO1 / 1C / PRS 101 / LMG 12228) GN=infB PE=3 SV=1	1	3	3	3	5.1	5.1	5.1	90.911	840	840	0	17.726	723790	2				55	254;356;544	True;True;True	266;374;571	454;644;1011	860;1271;2061	860;1271;2061
sp|Q9HV59|PNP_PSEAE	sp|Q9HV59|PNP_PSEAE	5	5	5	>sp|Q9HV59|PNP_PSEAE Polyribonucleotide nucleotidyltransferase OS=Pseudomonas aeruginosa (strain ATCC 15692 / PAO1 / 1C / PRS 101 / LMG 12228) GN=pnp PE=3 SV=1	1	5	5	5	9.3	9.3	9.3	75.452	701	701	0	31.554	4011600	7				56	22;69;131;290;584	True;True;True;True;True	24;74;140;307;611	44;128;238;523;524;1089	107;273;459;1007;1008;1009;2209	107;273;459;1007;2209
sp|Q9HVA2|ILVC_PSEAE	sp|Q9HVA2|ILVC_PSEAE	2	2	2	>sp|Q9HVA2|ILVC_PSEAE Ketol-acid reductoisomerase OS=Pseudomonas aeruginosa (strain ATCC 15692 / PAO1 / 1C / PRS 101 / LMG 12228) GN=ilvC PE=1 SV=1	1	2	2	2	8.9	8.9	8.9	36.424	338	338	0	17.977	4552100	4				57	13;206	True;True	13;216	22;353;354	55;642;643;644	55;642
sp|Q9HVC4|RL25_PSEAE	sp|Q9HVC4|RL25_PSEAE	2	2	2	>sp|Q9HVC4|RL25_PSEAE 50S ribosomal protein L25 OS=Pseudomonas aeruginosa (strain ATCC 15692 / PAO1 / 1C / PRS 101 / LMG 12228) GN=rplY PE=3 SV=1	1	2	2	2	12.3	12.3	12.3	21.962	204	204	0	13.114	7379400	3				58	117;559	True;True	124;586	212;1048;1049	411;2134;2135	411;2135
sp|Q9HVI7|GLYA3_PSEAE	sp|Q9HVI7|GLYA3_PSEAE	1	1	1	>sp|Q9HVI7|GLYA3_PSEAE Serine hydroxymethyltransferase 3 OS=Pseudomonas aeruginosa (strain ATCC 15692 / PAO1 / 1C / PRS 101 / LMG 12228) GN=glyA2 PE=3 SV=1	1	1	1	1	2.2	2.2	2.2	45.157	417	417	0	5.8206	1274100	2				59	495	TRUE	521	906	1778;1779	1778
sp|Q9HVN5|CLPB_PSEAE	sp|Q9HVN5|CLPB_PSEAE	3	2	2	>sp|Q9HVN5|CLPB_PSEAE Chaperone protein ClpB OS=Pseudomonas aeruginosa (strain ATCC 15692 / PAO1 / 1C / PRS 101 / LMG 12228) GN=clpB PE=3 SV=1	1	3	2	2	4.6	3	3	95.004	854	854	0	11.248	607210	1				60	26;365;439	True;True;False	28;383;463	49;672;816	113;1343;1640	113;1343;1640
sp|Q9HW11|Y4395_PSEAE	sp|Q9HW11|Y4395_PSEAE	2	2	2	>sp|Q9HW11|Y4395_PSEAE UPF0234 protein PA4395 OS=Pseudomonas aeruginosa (strain ATCC 15692 / PAO1 / 1C / PRS 101 / LMG 12228) GN=PA4395 PE=3 SV=1	1	2	2	2	21.4	21.4	21.4	18.044	159	159	0	13.49	2255600	4				61	450;595	True;True	475;622	835;1109;1110	1667;1668;2258;2259	1667;2258
sp|Q9HWC9|RPOC_PSEAE	sp|Q9HWC9|RPOC_PSEAE	11	11	11	>sp|Q9HWC9|RPOC_PSEAE DNA-directed RNA polymerase subunit beta OS=Pseudomonas aeruginosa (strain ATCC 15692 / PAO1 / 1C / PRS 101 / LMG 12228) GN=rpoC PE=3 SV=1	1	11	11	11	11.5	11.5	11.5	154.38	1399	1399	0	68.668	9442000	13				62	12;115;162;174;200;269;281;354;367;400;479	True;True;True;True;True;True;True;True;True;True;True	12;121;172;184;210;285;298;372;385;419;505	21;206;207;287;288;304;346;483;508;641;675;728;888	54;393;394;395;530;531;566;635;936;986;1268;1346;1445;1755	54;395;530;566;635;936;986;1268;1346;1445;1755
sp|Q9HWD2|EFG1_PSEAE;sp|Q9I244|EFG2_PSEAE	sp|Q9HWD2|EFG1_PSEAE	16;5	16;5	16;5	>sp|Q9HWD2|EFG1_PSEAE Elongation factor G 1 OS=Pseudomonas aeruginosa (strain ATCC 15692 / PAO1 / 1C / PRS 101 / LMG 12228) GN=fusA PE=1 SV=1	2	16	16	16	35.3	35.3	35.3	77.784	706	706;702	0	157.87	68079000	44				63	25;31;188;217;235;236;252;330;353;398;427;500;560;621;625;634	True;True;True;True;True;True;True;True;True;True;True;True;True;True;True;True	27;33;34;198;228;247;248;264;347;371;417;450;527;587;649;653;662	47;48;57;58;59;328;375;418;419;420;421;422;451;597;598;640;725;726;798;925;1050;1051;1149;1150;1156;1157;1187;1188	110;111;112;126;127;128;129;130;610;681;682;800;801;802;803;804;805;806;807;808;809;857;1163;1164;1165;1266;1267;1441;1442;1443;1615;1827;2136;2137;2138;2344;2345;2346;2353;2354;2452;2453;2454;2455	110;129;610;681;804;806;857;1164;1267;1441;1615;1827;2136;2345;2353;2452	16	388
sp|Q9HWD5|RL3_PSEAE	sp|Q9HWD5|RL3_PSEAE	1	1	1	>sp|Q9HWD5|RL3_PSEAE 50S ribosomal protein L3 OS=Pseudomonas aeruginosa (strain ATCC 15692 / PAO1 / 1C / PRS 101 / LMG 12228) GN=rplC PE=3 SV=1	1	1	1	1	4.7	4.7	4.7	22.591	211	211	0	6.1119	4652700	2				64	610	TRUE	638	1131;1132	2315;2316	2316
sp|Q9HWD8|RL2_PSEAE	sp|Q9HWD8|RL2_PSEAE	4	4	4	>sp|Q9HWD8|RL2_PSEAE 50S ribosomal protein L2 OS=Pseudomonas aeruginosa (strain ATCC 15692 / PAO1 / 1C / PRS 101 / LMG 12228) GN=rplB PE=3 SV=1	1	4	4	4	21.6	21.6	21.6	29.579	273	273	0	32.119	14434000	10				65	85;228;229;471	True;True;True;True	91;240;241;496	154;155;156;157;408;409;410;871;872	321;322;323;324;325;787;788;789;1720;1721	322;788;789;1721
sp|Q9HWE0|RL22_PSEAE	sp|Q9HWE0|RL22_PSEAE	1	1	1	>sp|Q9HWE0|RL22_PSEAE 50S ribosomal protein L22 OS=Pseudomonas aeruginosa (strain ATCC 15692 / PAO1 / 1C / PRS 101 / LMG 12228) GN=rplV PE=3 SV=1	1	1	1	1	19.1	19.1	19.1	11.911	110	110	0	6.3579	685960	2				66	582	TRUE	609	1086	2205;2206	2205
sp|Q9HWE2|RL16_PSEAE	sp|Q9HWE2|RL16_PSEAE	3	3	3	>sp|Q9HWE2|RL16_PSEAE 50S ribosomal protein L16 OS=Pseudomonas aeruginosa (strain ATCC 15692 / PAO1 / 1C / PRS 101 / LMG 12228) GN=rplP PE=3 SV=1	1	3	3	3	23.4	23.4	23.4	15.401	137	137	0	25.259	19613000	5				67	381;585;606	True;True;True	400;612;634	699;1090;1091;1127	1388;1389;2210;2211;2311	1388;2210;2311
sp|Q9HWE4|RS17_PSEAE	sp|Q9HWE4|RS17_PSEAE	2	2	2	>sp|Q9HWE4|RS17_PSEAE 30S ribosomal protein S17 OS=Pseudomonas aeruginosa (strain ATCC 15692 / PAO1 / 1C / PRS 101 / LMG 12228) GN=rpsQ PE=3 SV=1	1	2	2	2	20.5	20.5	20.5	10.086	88	88	0	11.922	1784200	3				68	96;267	True;True	102;283	175;481	347;348;934	347;934
sp|Q9HWE5|RL14_PSEAE	sp|Q9HWE5|RL14_PSEAE	3	3	3	>sp|Q9HWE5|RL14_PSEAE 50S ribosomal protein L14 OS=Pseudomonas aeruginosa (strain ATCC 15692 / PAO1 / 1C / PRS 101 / LMG 12228) GN=rplN PE=3 SV=1	1	3	3	3	31.1	31.1	31.1	13.412	122	122	0	19.561	4399300	5				69	176;403;626	True;True;True	186;423;654	306;307;734;1158	568;569;570;1471;2355	568;1471;2355
sp|Q9HWE8|RS14_PSEAE	sp|Q9HWE8|RS14_PSEAE	1	1	1	>sp|Q9HWE8|RS14_PSEAE 30S ribosomal protein S14 OS=Pseudomonas aeruginosa (strain ATCC 15692 / PAO1 / 1C / PRS 101 / LMG 12228) GN=rpsN PE=3 SV=1	1	1	1	1	12.9	12.9	12.9	11.565	101	101	0	6.2671	945280	3				70	44	TRUE	48	80;81	177;178;179	179
sp|Q9HWF1|RL18_PSEAE	sp|Q9HWF1|RL18_PSEAE	1	1	1	>sp|Q9HWF1|RL18_PSEAE 50S ribosomal protein L18 OS=Pseudomonas aeruginosa (strain ATCC 15692 / PAO1 / 1C / PRS 101 / LMG 12228) GN=rplR PE=3 SV=1	1	1	1	1	9.5	9.5	9.5	12.661	116	116	0	5.9886	289200	1				71	2	TRUE	2	3	3	3
sp|Q9HWF2|RS5_PSEAE	sp|Q9HWF2|RS5_PSEAE	3	3	3	>sp|Q9HWF2|RS5_PSEAE 30S ribosomal protein S5 OS=Pseudomonas aeruginosa (strain ATCC 15692 / PAO1 / 1C / PRS 101 / LMG 12228) GN=rpsE PE=3 SV=1	1	3	3	3	26.5	26.5	26.5	17.625	166	166	0	22.604	2615300	3				72	92;435;620	True;True;True	98;458;648	169;810;1148	339;1633;2343	339;1633;2343
sp|Q9HWF7|RS13_PSEAE	sp|Q9HWF7|RS13_PSEAE	2	2	2	>sp|Q9HWF7|RS13_PSEAE 30S ribosomal protein S13 OS=Pseudomonas aeruginosa (strain ATCC 15692 / PAO1 / 1C / PRS 101 / LMG 12228) GN=rpsM PE=3 SV=1	1	2	2	2	19.5	19.5	19.5	13.265	118	118	0	14.801	4202400	3				73	249;279	True;True	261;296	445;504;505	851;981;982	851;982
sp|Q9HX33|SYL_PSEAE	sp|Q9HX33|SYL_PSEAE	1	1	1	>sp|Q9HX33|SYL_PSEAE Leucine--tRNA ligase OS=Pseudomonas aeruginosa (strain ATCC 15692 / PAO1 / 1C / PRS 101 / LMG 12228) GN=leuS PE=3 SV=1	1	1	1	1	1.5	1.5	1.5	97.647	873	873	0	9.6238	618230	2				74	208	TRUE	218	357;358	647;648	647
sp|Q9HXZ4|PYRG_PSEAE	sp|Q9HXZ4|PYRG_PSEAE	2	2	2	>sp|Q9HXZ4|PYRG_PSEAE CTP synthase OS=Pseudomonas aeruginosa (strain ATCC 15692 / PAO1 / 1C / PRS 101 / LMG 12228) GN=pyrG PE=3 SV=1	1	2	2	2	5.5	5.5	5.5	59.617	542	542	0	11.832	1540400	3				75	297;542	True;True	314;569	541;1009	1064;2058;2059	1064;2059
sp|Q9HXZ5|ENO_PSEAE	sp|Q9HXZ5|ENO_PSEAE	3	3	3	>sp|Q9HXZ5|ENO_PSEAE Enolase OS=Pseudomonas aeruginosa (strain ATCC 15692 / PAO1 / 1C / PRS 101 / LMG 12228) GN=eno PE=3 SV=1	1	3	3	3	9.6	9.6	9.6	45.195	429	429	0	30.149	2032100	3				76	89;214;480	True;True;True	95;225;506	165;368;889	335;663;1756	335;663;1756
sp|Q9HZ71|RS1_PSEAE	sp|Q9HZ71|RS1_PSEAE	9	9	9	>sp|Q9HZ71|RS1_PSEAE 30S ribosomal protein S1 OS=Pseudomonas aeruginosa (strain ATCC 15692 / PAO1 / 1C / PRS 101 / LMG 12228) GN=rpsA PE=3 SV=1	1	9	9	9	24.2	24.2	24.2	61.869	559	559	0	68.93	21524000	17				77	30;142;192;205;320;475;478;507;563	True;True;True;True;True;True;True;True;True	32;151;202;215;337;501;504;534;590	56;258;334;335;352;585;882;886;887;937;938;1056;1057	124;125;493;619;620;621;641;1146;1747;1753;1754;1883;1884;1885;1886;1887;1888;2145;2146	124;493;619;641;1146;1747;1754;1883;2146
sp|Q9HZE0|DHE2_PSEAE	sp|Q9HZE0|DHE2_PSEAE	11	11	11	>sp|Q9HZE0|DHE2_PSEAE NAD-specific glutamate dehydrogenase OS=Pseudomonas aeruginosa (strain ATCC 15692 / PAO1 / 1C / PRS 101 / LMG 12228) GN=gdhB PE=1 SV=1	1	11	11	11	9.9	9.9	9.9	182.64	1620	1620	0	78.089	16615000	25				78	45;53;103;149;158;341;351;375;396;484;569	True;True;True;True;True;True;True;True;True;True;True	49;57;109;158;167;358;369;394;415;510;596	82;94;186;187;188;267;281;282;614;615;637;689;690;721;722;893;1068	180;196;360;361;362;363;364;365;366;367;368;369;505;506;523;524;1184;1185;1259;1372;1373;1436;1437;1438;1760;2171	180;196;362;506;524;1184;1259;1372;1438;1760;2171
sp|Q9HZZ2|EFP_PSEAE	sp|Q9HZZ2|EFP_PSEAE	2	2	2	>sp|Q9HZZ2|EFP_PSEAE Elongation factor P OS=Pseudomonas aeruginosa (strain ATCC 15692 / PAO1 / 1C / PRS 101 / LMG 12228) GN=efp PE=1 SV=1	1	2	2	2	12.8	12.8	12.8	20.985	188	188	0	15.075	1797500	2				79	10;574	True;True	10;601	19;1074	52;2180	52;2180
sp|Q9I0K4|ACEA_PSEAE	sp|Q9I0K4|ACEA_PSEAE	4	4	4	>sp|Q9I0K4|ACEA_PSEAE Isocitrate lyase OS=Pseudomonas aeruginosa (strain ATCC 15692 / PAO1 / 1C / PRS 101 / LMG 12228) GN=PA2634 PE=1 SV=1	1	4	4	4	9.8	9.8	9.8	58.886	531	531	0	34.989	4588000	11				80	159;372;515;609	True;True;True;True	168;391;542;637	283;684;958;959;960;1130	525;1366;1952;1953;1954;1955;1956;1957;1958;1959;2314	525;1366;1954;2314
sp|Q9I1M1|ODBB_PSEAE	sp|Q9I1M1|ODBB_PSEAE	1	1	1	>sp|Q9I1M1|ODBB_PSEAE 2-oxoisovalerate dehydrogenase subunit beta OS=Pseudomonas aeruginosa (strain ATCC 15692 / PAO1 / 1C / PRS 101 / LMG 12228) GN=bkdA2 PE=3 SV=1	1	1	1	1	4.3	4.3	4.3	38.324	350	350	0	6.1085	314700	1				81	493	TRUE	519	904	1776	1776
sp|Q9I2A8|ATOB_PSEAE	sp|Q9I2A8|ATOB_PSEAE	7	7	7	>sp|Q9I2A8|ATOB_PSEAE Acetyl-CoA acetyltransferase OS=Pseudomonas aeruginosa (strain ATCC 15692 / PAO1 / 1C / PRS 101 / LMG 12228) GN=atoB PE=3 SV=1	1	7	7	7	33.8	33.8	33.8	40.405	393	393	0	46.58	9062900	8				82	40;147;187;314;369;391;514	True;True;True;True;True;True;True	43;156;197;331;387;410;541	73;264;326;327;569;678;713;956;957	163;502;607;608;609;1104;1350;1419;1950;1951	163;502;607;1104;1350;1419;1950
sp|Q9I2V5|ACNB_PSEAE	sp|Q9I2V5|ACNB_PSEAE	15	15	15	>sp|Q9I2V5|ACNB_PSEAE Aconitate hydratase B OS=Pseudomonas aeruginosa (strain ATCC 15692 / PAO1 / 1C / PRS 101 / LMG 12228) GN=acnB PE=3 SV=1	1	15	15	15	26.8	26.8	26.8	93.627	869	869	0	117.46	43987000	43				83	1;4;21;35;109;119;296;346;380;382;408;413;508;535;599	True;True;True;True;True;True;True;True;True;True;True;True;True;True;True	1;4;23;38;115;126;313;364;399;401;428;433;535;562;626	2;6;7;8;42;43;64;195;196;215;540;624;625;626;627;697;698;700;740;741;748;749;939;940;995;996;1115;1116	2;6;7;8;9;10;105;106;146;377;378;379;414;1063;1200;1201;1202;1203;1204;1205;1206;1207;1208;1209;1384;1385;1386;1387;1390;1478;1479;1487;1488;1489;1889;1890;1891;1892;2039;2040;2275;2276;2277	2;10;106;146;377;414;1063;1206;1384;1390;1478;1487;1892;2040;2277
sp|Q9I2W7|RRAAH_PSEAE	sp|Q9I2W7|RRAAH_PSEAE	2	2	2	>sp|Q9I2W7|RRAAH_PSEAE Putative 4-hydroxy-4-methyl-2-oxoglutarate aldolase OS=Pseudomonas aeruginosa (strain ATCC 15692 / PAO1 / 1C / PRS 101 / LMG 12228) GN=PA1772 PE=1 SV=1	1	2	2	2	13	13	13	17.404	162	162	0	11.646	846560	2				84	57;127	True;True	61;136	100;232	206;449	206;449
sp|Q9I3D1|DLDH2_PSEAE	sp|Q9I3D1|DLDH2_PSEAE	9	9	9	>sp|Q9I3D1|DLDH2_PSEAE Dihydrolipoyl dehydrogenase OS=Pseudomonas aeruginosa (strain ATCC 15692 / PAO1 / 1C / PRS 101 / LMG 12228) GN=lpdG PE=3 SV=1	1	9	9	9	26.4	26.4	26.4	50.164	478	478	0	75.001	32872000	22				85	63;75;79;183;237;345;432;468;540	True;True;True;True;True;True;True;True;True	67;80;84;85;193;249;363;455;493;567	110;137;138;142;143;144;145;321;423;424;623;805;806;864;1005;1006	221;222;296;297;298;299;303;304;305;306;307;308;309;601;810;811;812;1199;1623;1624;1709;2053;2054	221;297;305;601;810;1199;1623;1709;2053	17	336
sp|Q9I3F5|ACNA_PSEAE	sp|Q9I3F5|ACNA_PSEAE	14	14	14	>sp|Q9I3F5|ACNA_PSEAE Aconitate hydratase A OS=Pseudomonas aeruginosa (strain ATCC 15692 / PAO1 / 1C / PRS 101 / LMG 12228) GN=acnA PE=3 SV=1	1	14	14	14	23.8	23.8	23.8	99.147	910	910	0	106.9	35362000	34				86	46;150;190;256;292;293;328;532;545;548;580;583;623;637	True;True;True;True;True;True;True;True;True;True;True;True;True;True	50;159;200;270;309;310;345;559;572;575;607;610;651;665	83;84;268;269;270;330;331;463;527;528;529;595;992;1012;1016;1017;1084;1087;1088;1152;1153;1191;1192	181;182;507;508;509;510;511;612;613;614;615;884;1015;1016;1017;1161;2036;2062;2066;2067;2068;2069;2070;2071;2072;2202;2203;2207;2208;2348;2349;2350;2458;2459	181;511;612;884;1015;1017;1161;2036;2062;2066;2203;2207;2350;2458
sp|Q9I4Z4|PAL_PSEAE	sp|Q9I4Z4|PAL_PSEAE	1	1	1	>sp|Q9I4Z4|PAL_PSEAE Peptidoglycan-associated lipoprotein OS=Pseudomonas aeruginosa (strain ATCC 15692 / PAO1 / 1C / PRS 101 / LMG 12228) GN=pal PE=3 SV=1	1	1	1	1	11.3	11.3	11.3	17.925	168	168	0	8.4332	1764700	1				87	636	TRUE	664	1190	2457	2457
sp|Q9I576|HPPD_PSEAE	sp|Q9I576|HPPD_PSEAE	2	2	2	>sp|Q9I576|HPPD_PSEAE 4-hydroxyphenylpyruvate dioxygenase OS=Pseudomonas aeruginosa (strain ATCC 15692 / PAO1 / 1C / PRS 101 / LMG 12228) GN=hpd PE=3 SV=1	1	2	2	2	7.6	7.6	7.6	39.912	357	357	0	21.084	2456300	5				88	423;547	True;True	446;574	791;792;1015	1602;1603;1604;1605;2065	1602;2065
sp|Q9I5Y1|ALF_PSEAE	sp|Q9I5Y1|ALF_PSEAE	4	4	4	>sp|Q9I5Y1|ALF_PSEAE Fructose-bisphosphate aldolase OS=Pseudomonas aeruginosa (strain ATCC 15692 / PAO1 / 1C / PRS 101 / LMG 12228) GN=fba PE=3 SV=1	1	4	4	4	13.6	13.6	13.6	38.573	354	354	0	24.426	1974000	5				89	179;189;533;628	True;True;True;True	189;199;560;656	312;329;993;1176	578;579;611;2037;2422	578;611;2037;2422
sp|Q9I5Z0|METK_PSEAE	sp|Q9I5Z0|METK_PSEAE	3	3	3	>sp|Q9I5Z0|METK_PSEAE S-adenosylmethionine synthase OS=Pseudomonas aeruginosa (strain ATCC 15692 / PAO1 / 1C / PRS 101 / LMG 12228) GN=metK PE=3 SV=1	1	3	3	3	12.4	12.4	12.4	42.709	396	396	0	21.099	2896700	7				90	246;429;520	True;True;True	258;452;547	440;801;802;971;972;973	845;1619;1620;2003;2004;2005;2006	845;1620;2005
sp|Q9I617|BIOF_PSEAE	sp|Q9I617|BIOF_PSEAE	1	1	1	>sp|Q9I617|BIOF_PSEAE 8-amino-7-oxononanoate synthase OS=Pseudomonas aeruginosa (strain ATCC 15692 / PAO1 / 1C / PRS 101 / LMG 12228) GN=bioF PE=3 SV=1	1	1	1	1	5	5	5	42.237	401	401	0	7.5563	1690700	0				91	78	TRUE	83	141	302	302
sp|Q9I636|MASZ_PSEAE	sp|Q9I636|MASZ_PSEAE	1	1	1	>sp|Q9I636|MASZ_PSEAE Malate synthase G OS=Pseudomonas aeruginosa (strain ATCC 15692 / PAO1 / 1C / PRS 101 / LMG 12228) GN=glcB PE=3 SV=1	1	1	1	1	1.2	1.2	1.2	78.659	725	725	0	5.8817	532240	1				92	556	TRUE	583	1044	2127	2127
sp|Q9I685|SAHH_PSEAE	sp|Q9I685|SAHH_PSEAE	8	8	8	>sp|Q9I685|SAHH_PSEAE Adenosylhomocysteinase OS=Pseudomonas aeruginosa (strain ATCC 15692 / PAO1 / 1C / PRS 101 / LMG 12228) GN=ahcY PE=3 SV=1	1	8	8	8	24.3	24.3	24.3	51.399	469	469	0	52.897	20126000	16				93	110;201;274;288;472;546;591;624	True;True;True;True;True;True;True;True	116;211;290;305;497;573;618;652	197;347;348;489;490;520;521;873;1013;1014;1103;1104;1154;1155	380;381;636;637;943;944;1004;1005;1722;2063;2064;2249;2250;2251;2252;2253;2351;2352	381;637;944;1004;1722;2064;2249;2351
sp|Q9I6M4|DAVT_PSEAE	sp|Q9I6M4|DAVT_PSEAE	8	8	8	>sp|Q9I6M4|DAVT_PSEAE 5-aminovalerate aminotransferase DavT OS=Pseudomonas aeruginosa (strain ATCC 15692 / PAO1 / 1C / PRS 101 / LMG 12228) GN=davT PE=1 SV=1	1	8	8	8	23.9	23.9	23.9	45.22	426	426	0	58.116	13802000	12				94	24;38;182;233;506;528;529;570	True;True;True;True;True;True;True;True	26;41;192;245;533;555;556;597	46;71;319;320;415;416;935;936;986;987;1069	109;161;599;600;796;797;798;1881;1882;2030;2031;2172	109;161;600;796;1881;2030;2031;2172
sp|Q9I6M5|DAVD_PSEAE	sp|Q9I6M5|DAVD_PSEAE	3	3	3	>sp|Q9I6M5|DAVD_PSEAE Glutarate-semialdehyde dehydrogenase DavD OS=Pseudomonas aeruginosa (strain ATCC 15692 / PAO1 / 1C / PRS 101 / LMG 12228) GN=davD PE=1 SV=1	1	3	3	3	10.1	10.1	10.1	51.622	483	483	0	26.9	4717700	3				95	310;377;587	True;True;True	327;396;614	564;693;1094;1095	1097;1378;2214;2215	1097;1378;2214
sp|Q9I747|HCP1_PSEAE	sp|Q9I747|HCP1_PSEAE	2	2	2	>sp|Q9I747|HCP1_PSEAE Protein hcp1 OS=Pseudomonas aeruginosa (strain ATCC 15692 / PAO1 / 1C / PRS 101 / LMG 12228) GN=hcp1 PE=1 SV=1	1	2	2	2	16.7	16.7	16.7	17.414	162	162	0	13.685	1584500	3				96	168;590	True;True	178;617	295;1102	541;542;2248	541;2248
sp|Q9I7C4|DPO3B_PSEAE	sp|Q9I7C4|DPO3B_PSEAE	1	1	1	>sp|Q9I7C4|DPO3B_PSEAE DNA polymerase III subunit beta OS=Pseudomonas aeruginosa (strain ATCC 15692 / PAO1 / 1C / PRS 101 / LMG 12228) GN=dnaN PE=3 SV=1	1	1	1	1	4.6	4.6	4.6	40.694	367	367	0	8.3672	573370	1				97	616	TRUE	644	1141	2334	2334
sp|Q9S508|PHZB2_PSEAE	sp|Q9S508|PHZB2_PSEAE	3	3	2	>sp|Q9S508|PHZB2_PSEAE Phenazine biosynthesis protein PhzB 2 OS=Pseudomonas aeruginosa (strain ATCC 15692 / PAO1 / 1C / PRS 101 / LMG 12228) GN=phzB2 PE=1 SV=1	1	3	3	2	32.1	32.1	25.9	19.027	162	162	0	21.79	22689000	9				98	62;284;406	True;True;True	66;301;426	108;109;513;514;737;738	217;218;219;220;992;993;1474;1475;1476	217;992;1474
sp|Q9X2T1|THIO_PSEAE	sp|Q9X2T1|THIO_PSEAE	1	1	1	>sp|Q9X2T1|THIO_PSEAE Thioredoxin OS=Pseudomonas aeruginosa (strain ATCC 15692 / PAO1 / 1C / PRS 101 / LMG 12228) GN=trxA PE=3 SV=1	1	1	1	1	11.1	11.1	11.1	11.87	108	108	0	6.3229	3495400	4				99	376	TRUE	395	691;692	1374;1375;1376;1377	1377
tr|Q9HTD1|Q9HTD1_PSEAE	tr|Q9HTD1|Q9HTD1_PSEAE	31	31	31	>tr|Q9HTD1|Q9HTD1_PSEAE Probable transcarboxylase subunit OS=Pseudomonas aeruginosa (strain ATCC 15692 / PAO1 / 1C / PRS 101 / LMG 12228) GN=PA5435 PE=4 SV=1	1	31	31	31	65.1	65.1	65.1	66.095	607	607	0	323.31	1237500000	451				100	7;14;64;72;73;91;100;121;141;181;221;226;227;240;241;245;255;264;315;321;401;452;453;473;474;476;521;553;588;600;631	True;True;True;True;True;True;True;True;True;True;True;True;True;True;True;True;True;True;True;True;True;True;True;True;True;True;True;True;True;True;True	7;14;68;69;77;78;97;106;128;129;150;191;232;237;238;239;252;253;257;267;268;269;279;280;332;338;420;421;477;478;498;499;500;502;548;580;615;627;628;659	14;15;23;24;25;26;111;112;113;114;115;116;132;133;134;167;168;180;181;182;183;218;219;220;221;255;256;257;315;316;317;318;381;382;388;389;390;391;392;393;394;395;396;397;398;399;400;401;402;403;404;405;406;407;429;430;431;432;433;434;439;455;456;457;458;459;460;461;462;475;476;477;478;570;571;586;587;729;730;731;732;838;839;840;841;842;874;875;876;877;878;879;880;881;883;974;975;1023;1024;1025;10…	39;40;41;42;43;44;45;46;47;48;56;57;58;59;60;61;62;63;64;65;66;67;68;69;70;71;72;73;74;75;223;224;225;226;227;228;229;230;231;232;233;234;235;236;237;238;239;240;241;242;243;244;245;246;247;248;279;280;281;282;283;284;285;286;287;288;289;290;291;292;293;337;338;354;355;356;357;421;422;423;424;425;426;427;428;429;430;431;432;433;434;480;481;482;483;484;485;486;487;488;489;490;491;492;585;586;587;5…	44;57;236;280;293;337;355;433;486;586;691;710;721;819;830;844;867;925;1105;1147;1454;1675;1680;1728;1744;1748;2013;2118;2219;2299;2437	18;19;20;21;22;23;24;25;26;27	125;169;172;182;239;251;274;306;323;435
tr|Q9HTD9|Q9HTD9_PSEAE	tr|Q9HTD9|Q9HTD9_PSEAE	7	7	7	>tr|Q9HTD9|Q9HTD9_PSEAE Alcohol dehydrogenase OS=Pseudomonas aeruginosa (strain ATCC 15692 / PAO1 / 1C / PRS 101 / LMG 12228) GN=adhA PE=1 SV=1	1	7	7	7	24	24	24	35.911	342	342	0	45.569	17891000	12				101	8;15;65;259;333;455;593	True;True;True;True;True;True;True	8;15;70;273;350;480;620	16;27;28;117;118;468;603;604;844;845;1106;1107	49;76;77;249;250;897;1170;1171;1172;1685;1686;2255;2256	49;77;249;897;1171;1686;2255
tr|Q9HTP2|Q9HTP2_PSEAE	tr|Q9HTP2|Q9HTP2_PSEAE	8	8	8	>tr|Q9HTP2|Q9HTP2_PSEAE Probable aldehyde dehydrogenase OS=Pseudomonas aeruginosa (strain ATCC 15692 / PAO1 / 1C / PRS 101 / LMG 12228) GN=PA5312 PE=3 SV=1	1	8	8	8	25.6	25.6	25.6	53.143	497	497	0	54.442	22271000	18				102	146;184;232;250;251;309;355;497	True;True;True;True;True;True;True;True	155;194;244;262;263;326;373;524	262;263;322;323;414;446;447;448;449;450;562;563;642;643;920	497;498;499;500;501;602;603;604;795;852;853;854;855;856;1095;1096;1269;1270;1819	498;602;795;854;856;1095;1270;1819
tr|Q9HU38|Q9HU38_PSEAE	tr|Q9HU38|Q9HU38_PSEAE	1	1	1	>tr|Q9HU38|Q9HU38_PSEAE Uncharacterized protein OS=Pseudomonas aeruginosa (strain ATCC 15692 / PAO1 / 1C / PRS 101 / LMG 12228) GN=PA5146 PE=4 SV=1	1	1	1	1	2.8	2.8	2.8	80.849	750	750	0	6.057	1005200	0				103	449	TRUE	474	834	1666	1666
tr|Q9HUD3|Q9HUD3_PSEAE	tr|Q9HUD3|Q9HUD3_PSEAE	5	5	5	>tr|Q9HUD3|Q9HUD3_PSEAE Malic enzyme OS=Pseudomonas aeruginosa (strain ATCC 15692 / PAO1 / 1C / PRS 101 / LMG 12228) GN=PA5046 PE=4 SV=1	1	5	5	5	18.7	18.7	18.7	45.428	422	422	0	32.105	8924100	10				104	3;118;362;510;522	True;True;True;True;True	3;125;380;537;549	4;5;213;214;669;943;944;976;977	4;5;412;413;1339;1900;1901;2019;2020;2021	5;413;1339;1900;2021
tr|Q9HV54|Q9HV54_PSEAE	tr|Q9HV54|Q9HV54_PSEAE	2	2	2	>tr|Q9HV54|Q9HV54_PSEAE Transcription termination/antitermination protein NusA OS=Pseudomonas aeruginosa (strain ATCC 15692 / PAO1 / 1C / PRS 101 / LMG 12228) GN=nusA PE=3 SV=1	1	2	2	2	7.7	7.7	7.7	54.658	493	493	0	12.022	700210	2				105	234;263	True;True	246;278	417;474	799;907	799;907
tr|Q9HVA3|Q9HVA3_PSEAE	tr|Q9HVA3|Q9HVA3_PSEAE	1	1	1	>tr|Q9HVA3|Q9HVA3_PSEAE Phosphatidylserine synthase OS=Pseudomonas aeruginosa (strain ATCC 15692 / PAO1 / 1C / PRS 101 / LMG 12228) GN=pssA PE=3 SV=1	1	1	1	1	3.7	3.7	3.7	29.27	271	271	0	5.9733	0	1				106	186	TRUE	196	325	606	606
tr|Q9HVJ1|Q9HVJ1_PSEAE	tr|Q9HVJ1|Q9HVJ1_PSEAE	3	3	3	>tr|Q9HVJ1|Q9HVJ1_PSEAE Probable ATP-binding component of ABC transporter OS=Pseudomonas aeruginosa (strain ATCC 15692 / PAO1 / 1C / PRS 101 / LMG 12228) GN=PA4595 PE=4 SV=1	1	3	3	3	8.3	8.3	8.3	61.32	554	554	0	20.417	2480100	4				107	51;177;337	True;True;True	55;187;354	91;308;309;609	191;571;572;1178	191;572;1178
tr|Q9HVY4|Q9HVY4_PSEAE	tr|Q9HVY4|Q9HVY4_PSEAE	1	1	1	>tr|Q9HVY4|Q9HVY4_PSEAE Ubiquinol-cytochrome c reductase iron-sulfur subunit OS=Pseudomonas aeruginosa (strain ATCC 15692 / PAO1 / 1C / PRS 101 / LMG 12228) GN=PA4431 PE=4 SV=1	1	1	1	1	5.6	5.6	5.6	20.828	197	197	0	6.4543	614570	2				108	80	TRUE	86	146;147	310;311	311
tr|Q9HW49|Q9HW49_PSEAE	tr|Q9HW49|Q9HW49_PSEAE	5	5	5	>tr|Q9HW49|Q9HW49_PSEAE Uncharacterized protein OS=Pseudomonas aeruginosa (strain ATCC 15692 / PAO1 / 1C / PRS 101 / LMG 12228) GN=PA4352 PE=3 SV=1	1	5	5	5	26.9	26.9	26.9	30.972	286	286	0	36.21	14639000	27				109	139;327;557;564;565	True;True;True;True;True	148;344;584;591;592	250;251;594;1045;1046;1058;1059;1060;1061;1062	473;474;1160;2128;2129;2130;2131;2132;2147;2148;2149;2150;2151;2152;2153;2154;2155;2156;2157;2158;2159;2160;2161;2162;2163;2164;2165	473;1160;2128;2156;2165
tr|Q9HW72|Q9HW72_PSEAE	tr|Q9HW72|Q9HW72_PSEAE	1	1	1	>tr|Q9HW72|Q9HW72_PSEAE Pyruvate kinase OS=Pseudomonas aeruginosa (strain ATCC 15692 / PAO1 / 1C / PRS 101 / LMG 12228) GN=pykA PE=3 SV=1	1	1	1	1	5.6	5.6	5.6	52.252	483	483	0	7.4522	940010	4				110	303	TRUE	320	552;553	1083;1084;1085;1086	1083
tr|Q9HWG9|Q9HWG9_PSEAE	tr|Q9HWG9|Q9HWG9_PSEAE	3	3	3	>tr|Q9HWG9|Q9HWG9_PSEAE Flavin-containing monooxygenase OS=Pseudomonas aeruginosa (strain ATCC 15692 / PAO1 / 1C / PRS 101 / LMG 12228) GN=phzS PE=1 SV=1	1	3	3	3	13.4	13.4	13.4	43.644	402	402	0	18.559	2180900	4				111	108;231;632	True;True;True	114;243;660	194;413;1184	375;376;794;2449	376;794;2449
tr|Q9HWU6|Q9HWU6_PSEAE	tr|Q9HWU6|Q9HWU6_PSEAE	1	1	1	>tr|Q9HWU6|Q9HWU6_PSEAE Adhesive protein CupB5 OS=Pseudomonas aeruginosa (strain ATCC 15692 / PAO1 / 1C / PRS 101 / LMG 12228) GN=cupB5 PE=4 SV=1	1	1	1	1	1	1	1	100.43	1018	1018	0	5.9937	188760	0				112	18	TRUE	20	38	101	101
tr|Q9HWV0|Q9HWV0_PSEAE	tr|Q9HWV0|Q9HWV0_PSEAE	5	5	5	>tr|Q9HWV0|Q9HWV0_PSEAE Probable nonribosomal peptide synthetase OS=Pseudomonas aeruginosa (strain ATCC 15692 / PAO1 / 1C / PRS 101 / LMG 12228) GN=PA4078 PE=4 SV=1	1	5	5	5	7.7	7.7	7.7	110.35	991	991	0	35.097	4891200	7				113	33;151;457;482;558	True;True;True;True;True	36;160;482;508;585	61;271;272;848;891;1047	132;133;512;513;514;1689;1758;2133	133;513;1689;1758;2133
tr|Q9I2C4|Q9I2C4_PSEAE;tr|Q9HX05|Q9HX05_PSEAE	tr|Q9I2C4|Q9I2C4_PSEAE;tr|Q9HX05|Q9HX05_PSEAE	2;2	2;2	2;2	>tr|Q9I2C4|Q9I2C4_PSEAE NAD+ dependent aldehyde dehydrogenase ExaC OS=Pseudomonas aeruginosa (strain ATCC 15692 / PAO1 / 1C / PRS 101 / LMG 12228) GN=exaC PE=3 SV=1;>tr|Q9HX05|Q9HX05_PSEAE Probable aldehyde dehydrogenase OS=Pseudomonas aeruginosa (strain A	2	2	2	2	6.3	6.3	6.3	54.892	506	506;506	0	13.426	4670600	3				114	247;338	True;True	259;355	441;442;610	846;847;1179	847;1179
tr|Q9HXA3|Q9HXA3_PSEAE	tr|Q9HXA3|Q9HXA3_PSEAE	1	1	1	>tr|Q9HXA3|Q9HXA3_PSEAE Extracelullar DNA degradation protein, EddA OS=Pseudomonas aeruginosa (strain ATCC 15692 / PAO1 / 1C / PRS 101 / LMG 12228) GN=eddA PE=4 SV=1	1	1	1	1	1.7	1.7	1.7	58.732	520	520	0	5.8691	0	1				115	394	TRUE	413	718	1433	1433
tr|Q9HXA5|Q9HXA5_PSEAE	tr|Q9HXA5|Q9HXA5_PSEAE	1	1	1	>tr|Q9HXA5|Q9HXA5_PSEAE Uncharacterized protein OS=Pseudomonas aeruginosa (strain ATCC 15692 / PAO1 / 1C / PRS 101 / LMG 12228) GN=PA3908 PE=4 SV=1	1	1	1	1	6.3	6.3	6.3	27.294	239	239	0	6.1329	5777400	3				116	368	TRUE	386	676;677	1347;1348;1349	1347
tr|Q9HY12|Q9HY12_PSEAE	tr|Q9HY12|Q9HY12_PSEAE	2	2	2	>tr|Q9HY12|Q9HY12_PSEAE Uncharacterized protein OS=Pseudomonas aeruginosa (strain ATCC 15692 / PAO1 / 1C / PRS 101 / LMG 12228) GN=PA3614 PE=4 SV=1	1	2	2	2	8.1	8.1	8.1	51.921	467	467	0	11.677	460090	3				117	71;430	True;True	76;453	131;803	277;278;1621	278;1621
tr|Q9HY13|Q9HY13_PSEAE	tr|Q9HY13|Q9HY13_PSEAE	4	4	4	>tr|Q9HY13|Q9HY13_PSEAE Uncharacterized protein OS=Pseudomonas aeruginosa (strain ATCC 15692 / PAO1 / 1C / PRS 101 / LMG 12228) GN=PA3613 PE=4 SV=1	1	4	4	4	6.2	6.2	6.2	88.378	801	801	0	25.306	6181700	6				118	97;124;513;567	True;True;True;True	103;132;540;594	176;177;226;954;955;1064;1065	349;350;441;1948;1949;2167;2168	350;441;1948;2167
tr|Q9HY77|Q9HY77_PSEAE	tr|Q9HY77|Q9HY77_PSEAE	1	1	1	>tr|Q9HY77|Q9HY77_PSEAE Glutaredoxin OS=Pseudomonas aeruginosa (strain ATCC 15692 / PAO1 / 1C / PRS 101 / LMG 12228) GN=PA3533 PE=3 SV=1	1	1	1	1	12	12	12	11.843	108	108	0	10.994	1639400	1				119	175	TRUE	185	305	567	567
tr|Q9HY81|Q9HY81_PSEAE	tr|Q9HY81|Q9HY81_PSEAE	2	2	2	>tr|Q9HY81|Q9HY81_PSEAE Probable peroxidase OS=Pseudomonas aeruginosa (strain ATCC 15692 / PAO1 / 1C / PRS 101 / LMG 12228) GN=PA3529 PE=1 SV=1	1	2	2	2	12	12	12	21.822	200	200	0	18.997	10175000	7				120	98;498	True;True	104;525	178;921;922	351;352;1820;1821;1822;1823;1824	351;1821
tr|Q9HYM3|Q9HYM3_PSEAE	tr|Q9HYM3|Q9HYM3_PSEAE	1	1	1	>tr|Q9HYM3|Q9HYM3_PSEAE Uncharacterized protein OS=Pseudomonas aeruginosa (strain ATCC 15692 / PAO1 / 1C / PRS 101 / LMG 12228) GN=PA3378 PE=4 SV=1	1	1	1	1	2.5	2.5	2.5	40.607	366	366	0.0065359	5.7527	3950600	1				121	639	TRUE	667	1195	2462	2462
tr|Q9HYT5|Q9HYT5_PSEAE	tr|Q9HYT5|Q9HYT5_PSEAE	6	6	6	>tr|Q9HYT5|Q9HYT5_PSEAE Uncharacterized protein OS=Pseudomonas aeruginosa (strain ATCC 15692 / PAO1 / 1C / PRS 101 / LMG 12228) GN=PA3309 PE=3 SV=1	1	6	6	6	55	55	55	16.496	151	151	0	60.263	76532000	37				122	242;262;287;371;554;575	True;True;True;True;True;True	254;276;277;304;389;390;581;602	435;471;472;473;518;519;680;681;682;683;1042;1075;1076	838;839;840;901;902;903;904;905;906;997;998;999;1000;1001;1002;1003;1353;1354;1355;1356;1357;1358;1359;1360;1361;1362;1363;1364;1365;2125;2181;2182;2183;2184;2185;2186;2187	840;903;997;1357;2125;2182	28;29	117;129
tr|Q9HZK4|Q9HZK4_PSEAE	tr|Q9HZK4|Q9HZK4_PSEAE	4	4	4	>tr|Q9HZK4|Q9HZK4_PSEAE Glyceraldehyde-3-phosphate dehydrogenase OS=Pseudomonas aeruginosa (strain ATCC 15692 / PAO1 / 1C / PRS 101 / LMG 12228) GN=PA3001 PE=3 SV=1	1	4	4	4	14.8	14.8	14.8	50.111	461	461	0	24.978	4845300	5				123	20;94;438;594	True;True;True;True	22;100;462;621	40;41;172;815;1108	103;104;344;1639;2257	103;344;1639;2257
tr|Q9I028|Q9I028_PSEAE	tr|Q9I028|Q9I028_PSEAE	2	2	2	>tr|Q9I028|Q9I028_PSEAE Probable acyl-CoA dehydrogenase OS=Pseudomonas aeruginosa (strain ATCC 15692 / PAO1 / 1C / PRS 101 / LMG 12228) GN=PA2815 PE=4 SV=1	1	2	2	2	6.1	6.1	6.1	88.762	815	815	0	15.807	2082200	3				124	598;633	True;True	625;661	1114;1185;1186	2274;2450;2451	2274;2450
tr|Q9I0L4|Q9I0L4_PSEAE	tr|Q9I0L4|Q9I0L4_PSEAE	4	4	4	>tr|Q9I0L4|Q9I0L4_PSEAE Isocitrate dehydrogenase OS=Pseudomonas aeruginosa (strain ATCC 15692 / PAO1 / 1C / PRS 101 / LMG 12228) GN=idh PE=4 SV=1	1	4	4	4	7.4	7.4	7.4	81.633	741	741	0	24.002	4638300	4				125	137;286;332;615	True;True;True;True	146;303;349;643	246;247;517;601;602;1140	469;470;996;1168;1169;2333	470;996;1168;2333
tr|Q9I0L5|Q9I0L5_PSEAE	tr|Q9I0L5|Q9I0L5_PSEAE	9	9	9	>tr|Q9I0L5|Q9I0L5_PSEAE Isocitrate dehydrogenase [NADP] OS=Pseudomonas aeruginosa (strain ATCC 15692 / PAO1 / 1C / PRS 101 / LMG 12228) GN=icd PE=3 SV=1	1	9	9	9	30.6	30.6	30.6	45.577	418	418	0	76.621	31390000	23				126	61;86;106;136;165;218;319;440;589	True;True;True;True;True;True;True;True;True	65;92;112;145;175;229;336;464;465;616	105;106;107;158;159;160;192;245;292;376;377;584;817;818;819;1098;1099;1100;1101	213;214;215;216;326;327;328;373;468;537;683;684;685;686;687;1145;1641;1642;1643;2242;2243;2244;2245;2246;2247	214;326;373;468;537;684;1145;1642;2245	30	47
tr|Q9I0T1|Q9I0T1_PSEAE	tr|Q9I0T1|Q9I0T1_PSEAE	5	5	5	>tr|Q9I0T1|Q9I0T1_PSEAE Probable acyl-CoA thiolase OS=Pseudomonas aeruginosa (strain ATCC 15692 / PAO1 / 1C / PRS 101 / LMG 12228) GN=PA2553 PE=3 SV=1	1	5	5	5	17.9	17.9	17.9	41.4	396	396	0	35.047	7715200	5				127	135;144;210;534;538	True;True;True;True;True	144;153;220;561;565	243;244;260;360;994;1001;1002	466;467;495;650;2038;2045;2046	467;495;650;2038;2046
tr|Q9I1E7|Q9I1E7_PSEAE	tr|Q9I1E7|Q9I1E7_PSEAE	1	1	1	>tr|Q9I1E7|Q9I1E7_PSEAE Alkyl hydroperoxide reductase AhpD OS=Pseudomonas aeruginosa (strain ATCC 15692 / PAO1 / 1C / PRS 101 / LMG 12228) GN=PA2331 PE=3 SV=1	1	1	1	1	6.5	6.5	6.5	19.904	186	186	0	7.3876	948320	1				128	193	TRUE	203	336	622	622
tr|Q9I1H5|Q9I1H5_PSEAE	tr|Q9I1H5|Q9I1H5_PSEAE	2	2	2	>tr|Q9I1H5|Q9I1H5_PSEAE Chitinase OS=Pseudomonas aeruginosa (strain ATCC 15692 / PAO1 / 1C / PRS 101 / LMG 12228) GN=chiC PE=3 SV=1	1	2	2	2	4.3	4.3	4.3	53.042	483	483	0	11.785	3106400	3				129	253;552	True;True	265;579	452;453;1022	858;859;2105	858;2105
tr|Q9I1N7|Q9I1N7_PSEAE	tr|Q9I1N7|Q9I1N7_PSEAE	1	1	1	>tr|Q9I1N7|Q9I1N7_PSEAE PslB OS=Pseudomonas aeruginosa (strain ATCC 15692 / PAO1 / 1C / PRS 101 / LMG 12228) GN=pslB PE=3 SV=1	1	1	1	1	2.7	2.7	2.7	53.515	488	488	0	6.1274	219580	1				130	163	TRUE	173	289	532	532
tr|Q9I246|Q9I246_PSEAE	tr|Q9I246|Q9I246_PSEAE	6	6	6	>tr|Q9I246|Q9I246_PSEAE Probable carbamoyl transferase OS=Pseudomonas aeruginosa (strain ATCC 15692 / PAO1 / 1C / PRS 101 / LMG 12228) GN=PA2069 PE=4 SV=1	1	6	6	6	15	15	15	63.382	574	574	0	45.567	8836400	11				131	107;300;446;481;486;488	True;True;True;True;True;True	113;317;471;507;512;514	193;545;546;829;830;890;895;897	374;1068;1069;1657;1658;1659;1660;1757;1762;1764;1765	374;1069;1657;1757;1762;1764
tr|Q9I299|Q9I299_PSEAE	tr|Q9I299|Q9I299_PSEAE	16	16	16	>tr|Q9I299|Q9I299_PSEAE Methylcrotonyl-CoA carboxylase, alpha-subunit (Biotin-containing) OS=Pseudomonas aeruginosa (strain ATCC 15692 / PAO1 / 1C / PRS 101 / LMG 12228) GN=liuD PE=1 SV=1	1	16	16	16	39.7	39.7	39.7	71.282	655	655	0	144.97	93511000	39				132	55;58;140;148;196;220;244;272;275;285;334;366;383;395;531;613	True;True;True;True;True;True;True;True;True;True;True;True;True;True;True;True	59;62;149;157;206;231;256;288;291;302;351;384;402;414;558;641	97;98;101;252;253;254;265;266;340;341;380;437;438;487;491;492;515;516;605;606;673;674;701;719;720;990;991;1136;1137	199;200;201;202;203;207;208;475;476;477;478;479;503;504;627;628;629;630;690;842;843;941;945;946;994;995;1173;1174;1175;1344;1345;1391;1392;1434;1435;2034;2035;2322;2323	199;207;475;504;628;690;842;941;945;994;1173;1344;1392;1434;2034;2322
tr|Q9I2A9|Q9I2A9_PSEAE	tr|Q9I2A9|Q9I2A9_PSEAE	1	1	1	>tr|Q9I2A9|Q9I2A9_PSEAE DhcB, dehydrocarnitine CoA transferase, subunit B OS=Pseudomonas aeruginosa (strain ATCC 15692 / PAO1 / 1C / PRS 101 / LMG 12228) GN=dhcB PE=4 SV=1	1	1	1	1	11	11	11	23.187	218	218	0	6.2124	1465500	4				133	216	TRUE	227	373;374	677;678;679;680	678
tr|Q9I2J2|Q9I2J2_PSEAE	tr|Q9I2J2|Q9I2J2_PSEAE	1	1	1	>tr|Q9I2J2|Q9I2J2_PSEAE ECF sigma factor, FemI OS=Pseudomonas aeruginosa (strain ATCC 15692 / PAO1 / 1C / PRS 101 / LMG 12228) GN=femI PE=3 SV=1	1	1	1	1	9.5	9.5	9.5	19.09	168	168	0.0065789	5.7617	2405600	0				134	629	TRUE	657	1177	2423	2423
tr|Q9I2R2|Q9I2R2_PSEAE	tr|Q9I2R2|Q9I2R2_PSEAE	1	1	1	>tr|Q9I2R2|Q9I2R2_PSEAE Probable oxidoreductase OS=Pseudomonas aeruginosa (strain ATCC 15692 / PAO1 / 1C / PRS 101 / LMG 12228) GN=PA1833 PE=4 SV=1	1	1	1	1	3.3	3.3	3.3	34.551	330	330	0	5.9136	324020	1				135	358	TRUE	376	646	1273	1273
tr|Q9I2R5|Q9I2R5_PSEAE	tr|Q9I2R5|Q9I2R5_PSEAE	1	1	1	>tr|Q9I2R5|Q9I2R5_PSEAE Uncharacterized protein OS=Pseudomonas aeruginosa (strain ATCC 15692 / PAO1 / 1C / PRS 101 / LMG 12228) GN=PA1830 PE=4 SV=1	1	1	1	1	10.6	10.6	10.6	11.11	104	104	0	6.9036	1599800	1				136	543	TRUE	570	1010	2060	2060
tr|Q9I2S3|Q9I2S3_PSEAE	tr|Q9I2S3|Q9I2S3_PSEAE	1	1	1	>tr|Q9I2S3|Q9I2S3_PSEAE Uncharacterized protein OS=Pseudomonas aeruginosa (strain ATCC 15692 / PAO1 / 1C / PRS 101 / LMG 12228) GN=fimL PE=4 SV=1	1	1	1	1	2	2	2	60.868	562	562	0.0064935	5.733	2048700	1				137	608	TRUE	636	1129	2313	2313
tr|Q9I2V3|Q9I2V3_PSEAE	tr|Q9I2V3|Q9I2V3_PSEAE	1	1	1	>tr|Q9I2V3|Q9I2V3_PSEAE Uncharacterized protein OS=Pseudomonas aeruginosa (strain ATCC 15692 / PAO1 / 1C / PRS 101 / LMG 12228) GN=PA1789 PE=1 SV=1	1	1	1	1	5.2	5.2	5.2	31.273	287	287	0	5.9321	2563500	2				138	282	TRUE	299	509;510	987;988	987
tr|Q9I2W9|Q9I2W9_PSEAE	tr|Q9I2W9|Q9I2W9_PSEAE	5	5	5	>tr|Q9I2W9|Q9I2W9_PSEAE Phosphoenolpyruvate synthase OS=Pseudomonas aeruginosa (strain ATCC 15692 / PAO1 / 1C / PRS 101 / LMG 12228) GN=ppsA PE=3 SV=1	1	5	5	5	8.8	8.8	8.8	85.816	791	791	0	36.684	4330700	6				139	173;273;494;526;573	True;True;True;True;True	183;289;520;553;600	303;488;905;982;983;1073	565;942;1777;2026;2027;2179	565;942;1777;2026;2179
tr|Q9I2Z1|Q9I2Z1_PSEAE	tr|Q9I2Z1|Q9I2Z1_PSEAE	1	1	1	>tr|Q9I2Z1|Q9I2Z1_PSEAE Uncharacterized protein OS=Pseudomonas aeruginosa (strain ATCC 15692 / PAO1 / 1C / PRS 101 / LMG 12228) GN=PA1746 PE=4 SV=1	1	1	1	1	6.5	6.5	6.5	18.189	168	168	0	6.1608	2294200	1				140	82	TRUE	88	150	315	315
tr|Q9I3B2|Q9I3B2_PSEAE	tr|Q9I3B2|Q9I3B2_PSEAE	2	2	2	>tr|Q9I3B2|Q9I3B2_PSEAE Beta-ketoacyl-ACP synthase I OS=Pseudomonas aeruginosa (strain ATCC 15692 / PAO1 / 1C / PRS 101 / LMG 12228) GN=fabB PE=3 SV=1	1	2	2	2	5.9	5.9	5.9	42.806	405	405	0	15.477	3150900	3				141	128;185	True;True	137;195	233;234;324	450;451;452;605	451;605
tr|Q9I3D3|Q9I3D3_PSEAE	tr|Q9I3D3|Q9I3D3_PSEAE	5	5	5	>tr|Q9I3D3|Q9I3D3_PSEAE 2-oxoglutarate dehydrogenase (E1 subunit) OS=Pseudomonas aeruginosa (strain ATCC 15692 / PAO1 / 1C / PRS 101 / LMG 12228) GN=sucA PE=4 SV=1	1	5	5	5	7	7	7	105.88	943	943	0	31.307	8230200	7				142	105;306;378;379;407	True;True;True;True;True	111;323;397;398;427	191;558;694;695;696;739	372;1091;1379;1380;1381;1382;1383;1477	372;1091;1379;1383;1477
tr|Q9I3D4|Q9I3D4_PSEAE	tr|Q9I3D4|Q9I3D4_PSEAE	4	4	4	>tr|Q9I3D4|Q9I3D4_PSEAE Succinate dehydrogenase (B subunit) OS=Pseudomonas aeruginosa (strain ATCC 15692 / PAO1 / 1C / PRS 101 / LMG 12228) GN=sdhB PE=4 SV=1	1	4	4	4	22.6	22.6	22.6	26.155	235	235	0	28.414	6958000	5				143	134;331;393;578	True;True;True;True	143;348;412;605	242;599;600;717;1079	465;1166;1167;1432;2191	465;1167;1432;2191
tr|Q9I3D5|Q9I3D5_PSEAE	tr|Q9I3D5|Q9I3D5_PSEAE	11	11	11	>tr|Q9I3D5|Q9I3D5_PSEAE Succinate dehydrogenase flavoprotein subunit OS=Pseudomonas aeruginosa (strain ATCC 15692 / PAO1 / 1C / PRS 101 / LMG 12228) GN=sdhA PE=3 SV=1	1	11	11	11	24.4	24.4	24.4	63.531	590	590	0	89.462	28257000	31				144	95;167;191;198;211;257;258;308;335;352;426	True;True;True;True;True;True;True;True;True;True;True	101;177;201;208;221;271;272;325;352;370;449	173;174;294;332;333;343;344;361;362;464;465;466;467;561;607;638;639;797	345;346;540;616;617;618;632;633;651;652;653;885;886;887;888;889;890;891;892;893;894;895;896;1094;1176;1260;1261;1262;1263;1264;1265;1613;1614	345;540;616;632;652;892;894;1094;1176;1264;1614
tr|Q9I4I1|Q9I4I1_PSEAE	tr|Q9I4I1|Q9I4I1_PSEAE	1	1	1	>tr|Q9I4I1|Q9I4I1_PSEAE Ribonucleoside-diphosphate reductase OS=Pseudomonas aeruginosa (strain ATCC 15692 / PAO1 / 1C / PRS 101 / LMG 12228) GN=nrdA PE=3 SV=1	1	1	1	1	1.7	1.7	1.7	107.11	963	963	0	6.175	305560	1				145	419	TRUE	442	768	1526	1526
tr|Q9I5E3|Q9I5E3_PSEAE	tr|Q9I5E3|Q9I5E3_PSEAE	1	1	1	>tr|Q9I5E3|Q9I5E3_PSEAE Citrate synthase OS=Pseudomonas aeruginosa (strain ATCC 15692 / PAO1 / 1C / PRS 101 / LMG 12228) GN=prpC PE=3 SV=1	1	1	1	1	3.7	3.7	3.7	41.689	375	375	0	6.9169	1726900	2				146	277	TRUE	293	495;496	949;950	949
tr|Q9I5F6|Q9I5F6_PSEAE	tr|Q9I5F6|Q9I5F6_PSEAE	1	1	1	>tr|Q9I5F6|Q9I5F6_PSEAE Bifunctional protein PutA OS=Pseudomonas aeruginosa (strain ATCC 15692 / PAO1 / 1C / PRS 101 / LMG 12228) GN=putA PE=3 SV=1	1	1	1	1	1.2	1.2	1.2	115.63	1060	1060	0	6.0142	285030	2				147	604	TRUE	632	1125	2308;2309	2309
tr|Q9I5U9|Q9I5U9_PSEAE	tr|Q9I5U9|Q9I5U9_PSEAE	14	14	14	>tr|Q9I5U9|Q9I5U9_PSEAE Uncharacterized protein OS=Pseudomonas aeruginosa (strain ATCC 15692 / PAO1 / 1C / PRS 101 / LMG 12228) GN=PA0588 PE=4 SV=1	1	14	14	14	32.5	32.5	32.5	73.722	640	640	0	125.43	47840000	34				148	68;125;154;223;261;363;370;374;397;399;425;441;517;619	True;True;True;True;True;True;True;True;True;True;True;True;True;True	73;133;134;163;234;275;381;388;393;416;418;448;466;544;647	126;127;227;228;229;276;384;470;670;679;687;688;723;724;727;795;796;820;821;962;963;1146;1147	271;272;442;443;444;445;446;518;706;899;900;1340;1341;1351;1352;1369;1370;1371;1439;1440;1444;1610;1611;1612;1644;1645;1646;1961;1962;1963;2339;2340;2341;2342	272;444;518;706;900;1340;1351;1369;1439;1444;1610;1646;1961;2339	31	412
tr|Q9I5Y8|Q9I5Y8_PSEAE	tr|Q9I5Y8|Q9I5Y8_PSEAE	1	1	1	>tr|Q9I5Y8|Q9I5Y8_PSEAE Transketolase OS=Pseudomonas aeruginosa (strain ATCC 15692 / PAO1 / 1C / PRS 101 / LMG 12228) GN=tktA PE=1 SV=1	1	1	1	1	2.6	2.6	2.6	72.219	665	665	0	6.8108	1049300	1				149	171	TRUE	181	300	555	555
tr|Q9I612|Q9I612_PSEAE	tr|Q9I612|Q9I612_PSEAE	1	1	1	>tr|Q9I612|Q9I612_PSEAE Probable acyl-CoA dehydrogenase OS=Pseudomonas aeruginosa (strain ATCC 15692 / PAO1 / 1C / PRS 101 / LMG 12228) GN=PA0506 PE=3 SV=1	1	1	1	1	2	2	2	65.358	601	601	0	6.1449	300000	1				150	322	TRUE	339	588	1153	1153
tr|Q9I659|Q9I659_PSEAE	tr|Q9I659|Q9I659_PSEAE	3	3	2	>tr|Q9I659|Q9I659_PSEAE Probable ClpA/B protease ATP binding subunit OS=Pseudomonas aeruginosa (strain ATCC 15692 / PAO1 / 1C / PRS 101 / LMG 12228) GN=PA0459 PE=4 SV=1	1	3	3	2	4.5	4.5	2.9	94.174	850	850	0	21.878	1242200	3				151	197;422;439	True;True;True	207;445;463	342;790;816	631;1601;1640	631;1601;1640
tr|Q9I671|Q9I671_PSEAE	tr|Q9I671|Q9I671_PSEAE	6	6	6	>tr|Q9I671|Q9I671_PSEAE Glutaryl-CoA dehydrogenase OS=Pseudomonas aeruginosa (strain ATCC 15692 / PAO1 / 1C / PRS 101 / LMG 12228) GN=gcdH PE=3 SV=1	1	6	6	6	25.4	25.4	25.4	43.311	393	393	0	48.467	13108000	15				152	81;122;126;238;243;415	True;True;True;True;True;True	87;130;135;250;255;437	148;149;222;223;230;231;425;426;436;758	312;313;314;435;436;437;438;447;448;813;814;841;1510;1511;1512	312;435;448;814;841;1511
tr|Q9I6H5|Q9I6H5_PSEAE	tr|Q9I6H5|Q9I6H5_PSEAE	1	1	1	>tr|Q9I6H5|Q9I6H5_PSEAE D-3-phosphoglycerate dehydrogenase OS=Pseudomonas aeruginosa (strain ATCC 15692 / PAO1 / 1C / PRS 101 / LMG 12228) GN=serA PE=3 SV=1	1	1	1	1	3.7	3.7	3.7	44.216	409	409	0	8.0262	366200	5				153	503	TRUE	530	930;931	1873;1874;1875;1876;1877	1877
tr|Q9I6Z3|Q9I6Z3_PSEAE	tr|Q9I6Z3|Q9I6Z3_PSEAE	6	6	6	>tr|Q9I6Z3|Q9I6Z3_PSEAE Alkyl hydroperoxide reductase subunit C OS=Pseudomonas aeruginosa (strain ATCC 15692 / PAO1 / 1C / PRS 101 / LMG 12228) GN=ahpC PE=4 SV=1	1	6	6	6	45.5	45.5	45.5	20.541	187	187	0	45.54	31845000	15				154	74;178;225;490;523;618	True;True;True;True;True;True	79;188;236;516;550;646	135;136;310;311;386;387;900;901;978;1144;1145	294;295;573;574;575;576;577;708;709;1771;1772;1773;2022;2337;2338	295;574;709;1771;2022;2337
tr|Q9I748|Q9I748_PSEAE	tr|Q9I748|Q9I748_PSEAE	1	1	1	>tr|Q9I748|Q9I748_PSEAE Uncharacterized protein OS=Pseudomonas aeruginosa (strain ATCC 15692 / PAO1 / 1C / PRS 101 / LMG 12228) GN=PA0084 PE=4 SV=1	1	1	1	1	2.4	2.4	2.4	55.771	498	498	0	8.1145	423160	1				155	487	TRUE	513	896	1763	1763

## Sheet: 2-2 proteinGroups Probe 12
Protein IDs	Majority protein IDs	Peptide counts (all)	Peptide counts (razor+unique)	Peptide counts (unique)	Fasta headers	Number of proteins	Peptides	Razor + unique peptides	Unique peptides	Sequence coverage [%]	Unique + razor sequence coverage [%]	Unique sequence coverage [%]	Mol. weight [kDa]	Sequence length	Sequence lengths	Q-value	Score	Intensity	MS/MS Count	Only identified by site	Reverse	Potential contaminant	id	Peptide IDs	Peptide is razor	Mod. peptide IDs	Evidence IDs	MS/MS IDs	Best MS/MS	Oxidation (M) site IDs	Oxidation (M) site positions
CON__P00761	CON__P00761	4	4	4	>P00761 SWISS-PROT:P00761|TRYP_PIG Trypsin - Sus scrofa (Pig).	1	4	4	4	25.1	25.1	25.1	24.409	231	231	0	95.288	1158400000	99			+	0	409;498;555;788	True;True;True;True	432;433;522;580;826	722;723;724;725;726;727;728;872;873;874;875;973;1388;1389	1405;1406;1407;1408;1409;1410;1411;1412;1413;1414;1415;1416;1417;1418;1419;1420;1421;1422;1423;1424;1425;1426;1427;1428;1429;1430;1431;1432;1433;1434;1435;1436;1437;1704;1705;1706;1707;1708;1709;1710;1711;1712;1713;1714;1715;1716;1717;1718;1719;1720;1721;1722;1723;1724;1725;1726;1727;1728;1729;1730;1731;1732;1733;1734;1904;1905;1906;1907;1908;1909;1910;1911;2701;2702;2703;2704;2705;2706;2707;2708…	1412;1717;1904;2705	0	94
CON__P04264;CON__Q6IFZ6;CON__Q922U2;CON__Q5XQN5;CON__Q9R0H5;CON__Q6NXH9;CON__Q8BGZ7;CON__P50446;CON__Q7Z794	CON__P04264	14;2;2;2;1;1;1;1;1	14;2;2;2;1;1;1;1;1	9;0;1;1;0;0;1;1;0	>P04264 SWISS-PROT:P04264 Tax_Id=9606 Gene_Symbol=KRT1 Keratin, type II cytoskeletal 1	9	14	14	9	22.2	22.2	14.3	66.017	644	644;572;580;601;524;539;551;553;578	0	153.77	100350000	44			+	1	25;210;278;385;476;533;615;620;659;695;703;756;757;906	True;True;True;True;True;True;True;True;True;True;True;True;True;True	27;225;226;296;407;500;558;648;653;695;732;740;794;795;946	48;49;383;384;385;386;491;492;684;839;939;940;1092;1093;1102;1103;1167;1225;1226;1237;1238;1340;1341;1342;1612;1613	121;122;123;787;788;789;790;791;976;977;978;979;980;981;982;983;984;1337;1645;1856;1857;1858;2156;2157;2172;2173;2174;2273;2367;2368;2369;2370;2371;2372;2386;2387;2388;2389;2390;2631;2632;2633;2634;3152;3153;3154	121;787;978;1337;1645;1856;2156;2172;2273;2371;2386;2631;2634;3153	1;2;3	259;262;469
CON__P07477	CON__P07477	1	1	1	>P07477 SWISS-PROT:P07477 Tax_Id=9606 Gene_Symbol=PRSS1 Trypsin-1 precursor	1	1	1	1	8.1	8.1	8.1	26.558	247	247	0	5.9301	18544000	2			+	2	499	TRUE	523	876	1735;1736	1736
CON__P13645;CON__P02535-1;CON__Q7Z3Z0;CON__Q7Z3Y8;CON__Q148H6;CON__Q7Z3Y7;CON__A2A4G1;CON__Q7Z3Y9;CON__Q9Z2K1;CON__P02533;CON__P08779;CON__Q3ZAW8	CON__P13645	12;5;2;2;2;2;1;1;1;1;1;1	12;5;2;2;2;2;1;1;1;1;1;1	12;5;2;2;2;2;1;1;1;1;1;1	>P13645 SWISS-PROT:P13645 Tax_Id=9606 Gene_Symbol=KRT10 Keratin, type I cytoskeletal 10	12	12	12	12	18.2	18.2	18.2	59.51	593	593;570;450;459;464;486;456;468;469;472;473;474	0	94.378	52715000	38			+	3	69;150;243;436;489;665;683;714;715;839;877;907	True;True;True;True;True;True;True;True;True;True;True;True	74;161;260;460;513;701;720;752;753;878;917;947	129;130;281;282;436;437;771;855;856;1176;1177;1209;1264;1265;1266;1267;1498;1499;1564;1614;1615	302;303;304;305;306;307;308;309;310;606;607;867;868;1522;1523;1669;1670;1671;1672;1673;1674;1675;2292;2293;2294;2347;2447;2448;2449;2450;2451;2889;2890;2891;3048;3155;3156;3157;3158	303;606;868;1522;1673;2294;2347;2447;2451;2891;3048;3156
CON__P35527	CON__P35527	1	1	1	>P35527 SWISS-PROT:P35527 Tax_Id=9606 Gene_Symbol=KRT9 Keratin, type I cytoskeletal 9	1	1	1	1	2.2	2.2	2.2	62.129	623	623	0	13.308	2770800	3			+	4	866	TRUE	905	1543;1544	2985;2986;2987	2986
CON__P35908	CON__P35908	5	3	1	>P35908 SWISS-PROT:P35908 Tax_Id=9606 Gene_Symbol=KRT2 Keratin, type II cytoskeletal 2 epidermal	1	5	3	1	8.5	5.4	1.9	65.865	645	645	0	22.201	4240300	6			+	5	116;278;313;385;793	True;False;True;False;True	123;296;331;407;831	216;217;491;492;546;547;684;1413	484;485;486;976;977;978;979;980;981;982;983;984;1065;1066;1337;2752	484;978;1065;1337;2752
CON__Streptavidin	CON__Streptavidin	4	4	4	>Streptavidin (S.avidinii)	1	4	4	4	43.1	43.1	43.1	16.622	160	160	0	159.24	583200000	126			+	6	429;605;718;903	True;True;True;True	453;638;756;943	760;761;762;763;1066;1067;1068;1069;1070;1071;1072;1073;1270;1271;1604;1605;1606;1607;1608;1609	1488;1489;1490;1491;1492;1493;1494;1495;1496;1497;1498;1499;1500;1501;1502;1503;1504;1505;1506;1507;1508;1509;1510;1511;1512;1513;2087;2088;2089;2090;2091;2092;2093;2094;2095;2096;2097;2098;2099;2100;2101;2102;2103;2104;2105;2106;2107;2108;2109;2110;2111;2112;2113;2114;2115;2116;2117;2118;2119;2120;2121;2122;2123;2124;2125;2126;2127;2128;2129;2454;2455;2456;2457;2458;2459;2460;2461;2462;2463;2464…	1505;2088;2455;3122
REV__tr|Q9HWP9|Q9HWP9_PSEAE	REV__tr|Q9HWP9|Q9HWP9_PSEAE	1	1	1	>tr|Q9HWP9|Q9HWP9_PSEAE Uncharacterized protein OS=Pseudomonas aeruginosa (strain ATCC 15692 / PAO1 / 1C / PRS 101 / LMG 12228) GN=PA4132 PE=4 SV=1	1	1	1	1	0	0	0	52.262	471	471	0.0044053	5.7913	1247200	1		+		7	299	TRUE	317	524	1030	1030
REV__tr|Q9I2H4|Q9I2H4_PSEAE	REV__tr|Q9I2H4|Q9I2H4_PSEAE	1	1	1	>tr|Q9I2H4|Q9I2H4_PSEAE Probable chemotaxis transducer OS=Pseudomonas aeruginosa (strain ATCC 15692 / PAO1 / 1C / PRS 101 / LMG 12228) GN=PA1930 PE=4 SV=1	1	1	1	1	0	0	0	47.8	431	431	0.0083333	5.672	108710	1		+		8	625	TRUE	659	1111	2186	2186
sp|G3XD94|UGND_PSEAE	sp|G3XD94|UGND_PSEAE	2	2	2	>sp|G3XD94|UGND_PSEAE UDP-N-acetyl-D-glucosamine 6-dehydrogenase OS=Pseudomonas aeruginosa (strain ATCC 15692 / PAO1 / 1C / PRS 101 / LMG 12228) GN=wbpA PE=1 SV=1	1	2	2	2	5.5	5.5	5.5	48.155	436	436	0	11.472	1616600	1				9	253;583	True;True	271;610	453;1019	909;2000	909;2000
sp|O30508|ARUC_PSEAE	sp|O30508|ARUC_PSEAE	1	1	1	>sp|O30508|ARUC_PSEAE Succinylornithine transaminase/acetylornithine aminotransferase OS=Pseudomonas aeruginosa (strain ATCC 15692 / PAO1 / 1C / PRS 101 / LMG 12228) GN=aruC PE=1 SV=2	1	1	1	1	4.7	4.7	4.7	43.747	406	406	0	6.4221	1330600	1				10	697	TRUE	734	1229	2375	2375
sp|O52759|RS4_PSEAE	sp|O52759|RS4_PSEAE	4	4	4	>sp|O52759|RS4_PSEAE 30S ribosomal protein S4 OS=Pseudomonas aeruginosa (strain ATCC 15692 / PAO1 / 1C / PRS 101 / LMG 12228) GN=rpsD PE=3 SV=2	1	4	4	4	19.9	19.9	19.9	23.277	206	206	0	34.578	21164000	8				11	61;361;484;552	True;True;True;True	66;381;508;577	115;116;637;850;968;969	280;281;1263;1664;1897;1898;1899;1900	280;1263;1664;1900
sp|O52760|RPOA_PSEAE	sp|O52760|RPOA_PSEAE	2	2	2	>sp|O52760|RPOA_PSEAE DNA-directed RNA polymerase subunit alpha OS=Pseudomonas aeruginosa (strain ATCC 15692 / PAO1 / 1C / PRS 101 / LMG 12228) GN=rpoA PE=3 SV=2	1	2	2	2	7.5	7.5	7.5	36.649	333	333	0	14.09	3151300	3				12	30;592	True;True	32;621	56;1035	131;2032;2033	131;2033
sp|O52761|RL17_PSEAE	sp|O52761|RL17_PSEAE	2	2	2	>sp|O52761|RL17_PSEAE 50S ribosomal protein L17 OS=Pseudomonas aeruginosa (strain ATCC 15692 / PAO1 / 1C / PRS 101 / LMG 12228) GN=rplQ PE=3 SV=1	1	2	2	2	20.9	20.9	20.9	14.504	129	129	0	11.56	2581500	2				13	89;901	True;True	95;941	167;1601	383;3109	383;3109
sp|O52762|CATA_PSEAE	sp|O52762|CATA_PSEAE	15	15	15	>sp|O52762|CATA_PSEAE Catalase OS=Pseudomonas aeruginosa (strain ATCC 15692 / PAO1 / 1C / PRS 101 / LMG 12228) GN=katA PE=1 SV=1	1	15	15	15	45.6	45.6	45.6	55.588	482	482	0	141.28	100230000	45				14	182;205;286;295;332;341;492;509;563;599;626;766;889;892;920	True;True;True;True;True;True;True;True;True;True;True;True;True;True;True	195;220;304;313;350;351;361;516;533;588;631;632;660;804;929;932;960	336;337;376;507;518;519;579;580;581;582;606;859;860;890;986;987;988;1056;1057;1058;1112;1354;1355;1356;1357;1580;1581;1587;1588;1589;1636;1637	708;709;780;1010;1023;1024;1125;1126;1127;1128;1129;1130;1131;1132;1133;1210;1678;1679;1680;1681;1682;1683;1756;1936;1937;1938;1939;1940;2073;2074;2075;2076;2077;2078;2187;2188;2648;2649;2650;2651;3079;3080;3089;3090;3091;3092;3093;3199;3200	708;780;1010;1024;1128;1210;1679;1756;1936;2074;2187;2648;3080;3091;3199	4;5	30;264
sp|O54439|ACP1_PSEAE	sp|O54439|ACP1_PSEAE	2	2	2	>sp|O54439|ACP1_PSEAE Acyl carrier protein 1 OS=Pseudomonas aeruginosa (strain ATCC 15692 / PAO1 / 1C / PRS 101 / LMG 12228) GN=acpP1 PE=3 SV=4	1	2	2	2	32.1	32.1	32.1	8.7406	78	78	0	24.025	27442000	15				15	443;445	True;True	467;469	781;782;783;786;787	1534;1535;1536;1537;1538;1539;1540;1541;1542;1543;1544;1545;1550;1551;1552	1534;1551
sp|O68822|AMPA_PSEAE	sp|O68822|AMPA_PSEAE	3	3	3	>sp|O68822|AMPA_PSEAE Cytosol aminopeptidase OS=Pseudomonas aeruginosa (strain ATCC 15692 / PAO1 / 1C / PRS 101 / LMG 12228) GN=pepA PE=3 SV=1	1	3	3	3	8.7	8.7	8.7	52.331	495	495	0	26.052	2484500	4				16	136;217;529	True;True;True	146;233;553	258;399;931	569;814;1831;1832	569;814;1832
sp|O69753|PHZB1_PSEAE	sp|O69753|PHZB1_PSEAE	4	1	1	>sp|O69753|PHZB1_PSEAE Phenazine biosynthesis protein PhzB 1 OS=Pseudomonas aeruginosa (strain ATCC 15692 / PAO1 / 1C / PRS 101 / LMG 12228) GN=phzB1 PE=3 SV=1	1	4	1	1	28.4	9.9	9.9	18.888	162	162	0	11.023	6657400	2				17	82;227;471;638	False;False;False;True	87;243;495;673	152;153;413;414;829;1135;1136	350;351;352;353;354;355;835;836;837;838;839;1629;2219;2220	354;838;1629;2219
sp|O69754|PHZF_PSEAE	sp|O69754|PHZF_PSEAE	3	3	3	>sp|O69754|PHZF_PSEAE Trans-2,3-dihydro-3-hydroxyanthranilate isomerase OS=Pseudomonas aeruginosa (strain ATCC 15692 / PAO1 / 1C / PRS 101 / LMG 12228) GN=phzF1 PE=3 SV=2	1	3	3	3	26.6	26.6	26.6	30.342	278	278	0	18.529	8601500	4				18	394;578;872	True;True;True	417;604;912	700;701;1011;1557	1378;1379;1974;3035	1378;1974;3035
sp|O82850|RS2_PSEAE	sp|O82850|RS2_PSEAE	5	5	5	>sp|O82850|RS2_PSEAE 30S ribosomal protein S2 OS=Pseudomonas aeruginosa (strain ATCC 15692 / PAO1 / 1C / PRS 101 / LMG 12228) GN=rpsB PE=3 SV=2	1	5	5	5	34.6	34.6	34.6	27.336	246	246	0	52.481	24077000	12				19	171;184;506;754;895	True;True;True;True;True	183;198;530;792;935	318;319;343;886;1336;1337;1592;1593	668;669;670;727;728;1752;2625;2626;2627;2628;3097;3098	668;727;1752;2625;3097
sp|O82851|EFTS_PSEAE	sp|O82851|EFTS_PSEAE	9	9	9	>sp|O82851|EFTS_PSEAE Elongation factor Ts OS=Pseudomonas aeruginosa (strain ATCC 15692 / PAO1 / 1C / PRS 101 / LMG 12228) GN=tsf PE=3 SV=1	1	9	9	9	40.5	40.5	40.5	30.653	289	289	0	60.289	47031000	19				20	27;48;166;234;276;314;370;558;644	True;True;True;True;True;True;True;True;True	29;50;177;251;294;332;391;583;680	52;83;309;425;488;489;548;549;657;658;978;979;1145	127;180;649;856;971;972;973;974;1067;1068;1299;1300;1301;1920;1921;1922;1923;1924;1925;1926;2242	127;180;649;856;972;1068;1299;1921;2242
sp|O86428|ILVE_PSEAE	sp|O86428|ILVE_PSEAE	2	2	2	>sp|O86428|ILVE_PSEAE Branched-chain-amino-acid aminotransferase OS=Pseudomonas aeruginosa (strain ATCC 15692 / PAO1 / 1C / PRS 101 / LMG 12228) GN=ilvE PE=1 SV=2	1	2	2	2	8.1	8.1	8.1	34.084	307	307	0	14.635	11589000	5				21	148;631	True;True	159;666	277;278;1123;1124;1125	597;598;2202;2203;2204	598;2203
sp|P04739|FMPO_PSEAE	sp|P04739|FMPO_PSEAE	4	4	4	>sp|P04739|FMPO_PSEAE Fimbrial protein OS=Pseudomonas aeruginosa (strain ATCC 15692 / PAO1 / 1C / PRS 101 / LMG 12228) GN=pilA PE=1 SV=1	1	4	4	4	36.2	36.2	36.2	15.512	149	149	0	34.725	15962000	10				22	399;680;719;777	True;True;True;True	422;717;757;815	708;709;710;1206;1272;1273;1371	1387;1388;1389;1390;1391;1392;2344;2473;2474;2672	1388;2344;2473;2672
sp|P05384|DBHB_PSEAE	sp|P05384|DBHB_PSEAE	2	2	2	>sp|P05384|DBHB_PSEAE DNA-binding protein HU-beta OS=Pseudomonas aeruginosa (strain ATCC 15692 / PAO1 / 1C / PRS 101 / LMG 12228) GN=hupB PE=1 SV=3	1	2	2	2	32.2	32.2	32.2	9.0865	90	90	0	27.793	20109000	6				23	67;684	True;True	72;721	125;126;1210	296;297;298;299;2348;2349	299;2349
sp|P08280|RECA_PSEAE	sp|P08280|RECA_PSEAE	1	1	1	>sp|P08280|RECA_PSEAE Protein RecA OS=Pseudomonas aeruginosa (strain ATCC 15692 / PAO1 / 1C / PRS 101 / LMG 12228) GN=recA PE=3 SV=1	1	1	1	1	5.2	5.2	5.2	36.879	346	346	0	5.9841	630590	2				24	708	TRUE	745	1245;1246	2398;2399	2399
sp|P08308|OTCC_PSEAE	sp|P08308|OTCC_PSEAE	13	13	13	>sp|P08308|OTCC_PSEAE Ornithine carbamoyltransferase, catabolic OS=Pseudomonas aeruginosa (strain ATCC 15692 / PAO1 / 1C / PRS 101 / LMG 12228) GN=arcB PE=1 SV=3	1	13	13	13	53	53	53	38.108	336	336	0	86.482	119670000	37				25	58;232;240;265;343;412;561;562;598;612;622;652;656	True;True;True;True;True;True;True;True;True;True;True;True;True	63;249;257;283;363;436;586;587;629;630;645;655;656;688;692	112;422;433;470;471;608;609;732;983;984;985;1053;1054;1055;1086;1087;1105;1106;1107;1108;1158;1162;1163	277;853;864;939;940;941;942;943;944;1212;1213;1214;1215;1216;1217;1441;1931;1932;1933;1934;1935;2068;2069;2070;2071;2072;2148;2149;2150;2176;2177;2178;2179;2180;2181;2182;2260;2264;2265	277;853;864;940;1213;1441;1934;1935;2069;2148;2176;2260;2264	6;7;8	101;169;261
sp|P09591|EFTU_PSEAE	sp|P09591|EFTU_PSEAE	13	13	13	>sp|P09591|EFTU_PSEAE Elongation factor Tu OS=Pseudomonas aeruginosa (strain ATCC 15692 / PAO1 / 1C / PRS 101 / LMG 12228) GN=tufA PE=1 SV=2	1	13	13	13	46.9	46.9	46.9	43.369	397	397	0	178.38	358870000	125				26	21;37;44;56;156;175;325;359;567;595;666;772;868	True;True;True;True;True;True;True;True;True;True;True;True;True	21;22;23;39;46;60;61;167;187;188;343;379;592;624;625;626;702;810;907	37;38;39;40;41;42;43;67;77;78;105;106;107;108;109;294;295;323;324;325;326;327;328;566;567;568;569;634;635;992;993;1039;1040;1041;1042;1043;1044;1045;1046;1047;1178;1179;1365;1366;1546	102;103;104;105;106;107;108;109;110;111;112;113;114;147;166;167;168;169;170;171;172;173;174;175;250;251;252;253;254;255;256;257;258;259;260;261;262;263;264;265;266;267;629;630;674;675;676;677;678;679;680;681;682;683;684;685;686;687;688;689;690;691;692;693;694;695;696;1098;1099;1100;1101;1102;1103;1104;1105;1106;1107;1258;1259;1260;1944;1945;1946;1947;1948;1949;1950;1951;1952;1953;1954;2038;2039;2…	104;147;166;251;630;680;1101;1258;1951;2046;2295;2666;2990	9;10;11;12;13;14	140;152;177;216;362;372
sp|P0C2B2|DSBA_PSEAE	sp|P0C2B2|DSBA_PSEAE	1	1	1	>sp|P0C2B2|DSBA_PSEAE Thiol:disulfide interchange protein DsbA OS=Pseudomonas aeruginosa (strain ATCC 15692 / PAO1 / 1C / PRS 101 / LMG 12228) GN=dsbA PE=1 SV=1	1	1	1	1	6.6	6.6	6.6	23.375	211	211	0.0042553	5.7216	495130	1				27	480	TRUE	504	845	1658	1658
sp|P11221|OPRI_PSEAE	sp|P11221|OPRI_PSEAE	1	1	1	>sp|P11221|OPRI_PSEAE Major outer membrane lipoprotein OS=Pseudomonas aeruginosa (strain ATCC 15692 / PAO1 / 1C / PRS 101 / LMG 12228) GN=oprI PE=3 SV=1	1	1	1	1	12	12	12	8.8348	83	83	0	7.6876	2707000	6				28	557	TRUE	582	976;977	1914;1915;1916;1917;1918;1919	1915
sp|P11436|AMIE_PSEAE	sp|P11436|AMIE_PSEAE	1	1	1	>sp|P11436|AMIE_PSEAE Aliphatic amidase OS=Pseudomonas aeruginosa (strain ATCC 15692 / PAO1 / 1C / PRS 101 / LMG 12228) GN=amiE PE=1 SV=2	1	1	1	1	3.8	3.8	3.8	38.494	346	346	0.0041667	5.6727	160730	2				29	360	TRUE	380	636	1261;1262	1262
sp|P13794|PORF_PSEAE	sp|P13794|PORF_PSEAE	8	8	8	>sp|P13794|PORF_PSEAE Outer membrane porin F OS=Pseudomonas aeruginosa (strain ATCC 15692 / PAO1 / 1C / PRS 101 / LMG 12228) GN=oprF PE=1 SV=1	1	8	8	8	25.7	25.7	25.7	37.639	350	350	0	81.194	75070000	42				30	124;201;668;672;795;834;851;852	True;True;True;True;True;True;True;True	132;216;704;708;833;873;890;891	232;233;370;371;1181;1182;1188;1189;1190;1415;1416;1490;1516;1517;1518	507;508;509;510;763;764;765;766;767;768;769;770;771;772;773;774;775;2302;2303;2304;2305;2311;2312;2313;2314;2315;2316;2317;2318;2754;2755;2756;2877;2916;2917;2918;2919;2920;2921;2922;2923;2924	510;764;2302;2313;2754;2877;2916;2917
sp|P13981|ARCA_PSEAE	sp|P13981|ARCA_PSEAE	17	17	17	>sp|P13981|ARCA_PSEAE Arginine deiminase OS=Pseudomonas aeruginosa (strain ATCC 15692 / PAO1 / 1C / PRS 101 / LMG 12228) GN=arcA PE=1 SV=2	1	17	17	17	46.4	46.4	46.4	46.435	418	418	0	216.55	207580000	92				31	50;164;181;261;322;438;460;472;632;645;653;671;728;740;741;832;883	True;True;True;True;True;True;True;True;True;True;True;True;True;True;True;True;True	53;175;194;279;340;462;484;496;667;681;689;707;766;778;779;871;923	92;93;306;307;334;335;463;464;560;561;774;775;807;808;830;831;832;833;1126;1146;1147;1159;1185;1186;1187;1290;1291;1314;1315;1316;1317;1488;1572;1573	219;220;221;222;644;645;646;647;704;705;706;707;926;927;928;929;930;1084;1085;1086;1087;1088;1089;1526;1527;1581;1582;1583;1584;1630;1631;1632;1633;1634;1635;1636;1637;1638;2205;2206;2243;2244;2245;2246;2261;2308;2309;2310;2502;2503;2504;2505;2506;2507;2508;2569;2570;2571;2572;2573;2574;2575;2576;2577;2578;2579;2580;2581;2582;2583;2584;2585;2586;2587;2588;2589;2590;2591;2592;2593;2594;2874;2875;3…	220;647;707;926;1085;1526;1583;1631;2206;2243;2261;2310;2503;2570;2593;2875;3065
sp|P13982|ARCC_PSEAE	sp|P13982|ARCC_PSEAE	6	6	6	>sp|P13982|ARCC_PSEAE Carbamate kinase OS=Pseudomonas aeruginosa (strain ATCC 15692 / PAO1 / 1C / PRS 101 / LMG 12228) GN=arcC PE=3 SV=1	1	6	6	6	29	29	29	33.08	310	310	0	55.999	33587000	16				32	54;154;450;502;786;864	True;True;True;True;True;True	57;165;474;526;824;903	97;98;288;289;794;795;879;880;1385;1386;1540	226;227;228;613;614;615;616;617;618;619;1561;1562;1739;1740;1741;2696;2697;2980	226;613;1561;1739;2696;2980
sp|P14165|CISY_PSEAE	sp|P14165|CISY_PSEAE	1	1	1	>sp|P14165|CISY_PSEAE Citrate synthase OS=Pseudomonas aeruginosa (strain ATCC 15692 / PAO1 / 1C / PRS 101 / LMG 12228) GN=gltA PE=3 SV=2	1	1	1	1	3	3	3	47.694	428	428	0	9.7534	1244400	1				33	585	TRUE	612	1021	2002	2002
sp|P15276|ALGP_PSEAE	sp|P15276|ALGP_PSEAE	2	2	2	>sp|P15276|ALGP_PSEAE Transcriptional regulatory protein AlgP OS=Pseudomonas aeruginosa (strain ATCC 15692 / PAO1 / 1C / PRS 101 / LMG 12228) GN=algP PE=4 SV=2	1	2	2	2	4.5	4.5	4.5	34.49	352	352	0	24.81	18996000	13				34	117;254	True;True	124;272	218;219;220;454;455	487;488;489;490;910;911;912;913;914;915;916;917;918	487;910
sp|P24474|NIRS_PSEAE	sp|P24474|NIRS_PSEAE	1	1	1	>sp|P24474|NIRS_PSEAE Nitrite reductase OS=Pseudomonas aeruginosa (strain ATCC 15692 / PAO1 / 1C / PRS 101 / LMG 12228) GN=nirS PE=1 SV=1	1	1	1	1	3.3	3.3	3.3	62.653	568	568	0	6.0259	812170	1				35	1	TRUE	1	1	1	1
sp|P26276|ALGC_PSEAE	sp|P26276|ALGC_PSEAE	1	1	1	>sp|P26276|ALGC_PSEAE Phosphomannomutase/phosphoglucomutase OS=Pseudomonas aeruginosa (strain ATCC 15692 / PAO1 / 1C / PRS 101 / LMG 12228) GN=algC PE=1 SV=4	1	1	1	1	3.2	3.2	3.2	50.295	463	463	0.004329	5.7441	449050	0				36	822	TRUE	861	1465	2844	2844
sp|P28810|MMSA_PSEAE	sp|P28810|MMSA_PSEAE	1	1	1	>sp|P28810|MMSA_PSEAE Methylmalonate-semialdehyde dehydrogenase [acylating] OS=Pseudomonas aeruginosa (strain ATCC 15692 / PAO1 / 1C / PRS 101 / LMG 12228) GN=mmsA PE=1 SV=2	1	1	1	1	3.4	3.4	3.4	53.663	497	497	0	6.9321	3619600	2				37	513	TRUE	537	908;909	1806;1807	1807
sp|P30718|CH60_PSEAE	sp|P30718|CH60_PSEAE	29	29	29	>sp|P30718|CH60_PSEAE 60 kDa chaperonin OS=Pseudomonas aeruginosa (strain ATCC 15692 / PAO1 / 1C / PRS 101 / LMG 12228) GN=groL PE=1 SV=3	1	29	29	29	69.5	69.5	69.5	57.085	547	547	0	323.31	943640000	303				38	11;49;55;79;80;91;94;119;132;134;170;230;244;246;270;306;357;358;466;474;588;640;655;657;658;660;687;797;810	True;True;True;True;True;True;True;True;True;True;True;True;True;True;True;True;True;True;True;True;True;True;True;True;True;True;True;True;True	11;51;52;58;59;84;85;97;98;101;126;140;142;143;144;181;182;246;247;261;262;264;288;324;377;378;490;498;616;617;675;676;691;693;694;696;724;835;848;849	18;84;85;86;87;88;89;90;91;99;100;101;102;103;104;145;146;147;148;149;169;170;171;172;173;174;177;178;179;180;223;247;248;250;251;252;253;254;255;313;314;315;316;317;418;419;420;438;439;440;441;444;445;480;481;535;536;630;631;632;633;821;822;835;836;1027;1028;1029;1030;1138;1139;1140;1161;1164;1165;1166;1168;1169;1214;1215;1420;1421;1439;1440;1441	53;54;55;56;57;58;59;181;182;183;184;185;186;187;188;189;190;191;192;193;194;195;196;197;198;199;200;201;202;203;204;205;206;207;208;209;210;211;212;213;214;215;216;217;218;229;230;231;232;233;234;235;236;237;238;239;240;241;242;243;244;245;246;247;248;249;330;331;332;333;334;335;336;337;338;339;340;341;342;343;344;345;385;386;387;388;389;390;391;392;393;394;395;396;397;398;399;400;403;404;405;40…	54;188;232;337;342;386;426;493;536;546;656;847;871;896;958;1050;1246;1256;1620;1640;2022;2223;2263;2267;2272;2280;2356;2765;2788	15;16;17;18;19;20;21;22;23;24	16;69;111;114;166;193;233;267;288;389
sp|P30720|CH10_PSEAE	sp|P30720|CH10_PSEAE	2	2	2	>sp|P30720|CH10_PSEAE 10 kDa chaperonin OS=Pseudomonas aeruginosa (strain ATCC 15692 / PAO1 / 1C / PRS 101 / LMG 12228) GN=groS PE=3 SV=1	1	2	2	2	30.9	30.9	30.9	10.267	97	97	0	11.394	4095300	2				39	731;884	True;True	769;924	1300;1574	2550;2551;3069	2550;3069
sp|P32722|PORD_PSEAE	sp|P32722|PORD_PSEAE	1	1	1	>sp|P32722|PORD_PSEAE Porin D OS=Pseudomonas aeruginosa (strain ATCC 15692 / PAO1 / 1C / PRS 101 / LMG 12228) GN=oprD PE=1 SV=1	1	1	1	1	3.2	3.2	3.2	48.36	443	443	0	5.9926	149460	1				40	93	TRUE	100	176	402	402
sp|P37798|ACCC_PSEAE	sp|P37798|ACCC_PSEAE	3	3	3	>sp|P37798|ACCC_PSEAE Biotin carboxylase OS=Pseudomonas aeruginosa (strain ATCC 15692 / PAO1 / 1C / PRS 101 / LMG 12228) GN=accC PE=1 SV=1	1	3	3	3	8.7	8.7	8.7	48.887	449	449	0	19.208	6518700	5				41	606;827;831	True;True;True	639;866;870	1074;1075;1472;1473;1487	2130;2131;2857;2858;2859;2873	2130;2859;2873
sp|P37799|BCCP_PSEAE	sp|P37799|BCCP_PSEAE	5	5	5	>sp|P37799|BCCP_PSEAE Biotin carboxyl carrier protein of acetyl-CoA carboxylase OS=Pseudomonas aeruginosa (strain ATCC 15692 / PAO1 / 1C / PRS 101 / LMG 12228) GN=accB PE=3 SV=1	1	5	5	5	53.2	53.2	53.2	16.455	156	156	0	148.73	1446700000	184				42	10;462;512;711;730	True;True;True;True;True	10;486;536;748;749;768	14;15;16;17;810;811;812;813;814;815;816;896;897;898;899;900;901;902;903;904;905;906;907;1249;1250;1251;1252;1253;1254;1255;1256;1257;1258;1259;1293;1294;1295;1296;1297;1298;1299	18;19;20;21;22;23;24;25;26;27;28;29;30;31;32;33;34;35;36;37;38;39;40;41;42;43;44;45;46;47;48;49;50;51;52;1586;1587;1588;1589;1590;1591;1592;1593;1594;1595;1596;1597;1598;1599;1600;1601;1602;1603;1604;1605;1606;1607;1608;1609;1610;1611;1612;1613;1614;1762;1763;1764;1765;1766;1767;1768;1769;1770;1771;1772;1773;1774;1775;1776;1777;1778;1779;1780;1781;1782;1783;1784;1785;1786;1787;1788;1789;1790;1791…	19;1603;1781;2416;2513	25	87
sp|P43336|PHHC_PSEAE	sp|P43336|PHHC_PSEAE	3	3	3	>sp|P43336|PHHC_PSEAE Aromatic-amino-acid aminotransferase OS=Pseudomonas aeruginosa (strain ATCC 15692 / PAO1 / 1C / PRS 101 / LMG 12228) GN=phhC PE=3 SV=2	1	3	3	3	10.8	10.8	10.8	43.273	399	399	0	20.562	7134200	7				43	14;397;860	True;True;True	14;420;899	22;23;705;1534;1535	69;70;1383;1384;2972;2973;2974	69;1383;2974
sp|P47204|FTSZ_PSEAE	sp|P47204|FTSZ_PSEAE	2	2	2	>sp|P47204|FTSZ_PSEAE Cell division protein FtsZ OS=Pseudomonas aeruginosa (strain ATCC 15692 / PAO1 / 1C / PRS 101 / LMG 12228) GN=ftsZ PE=1 SV=2	1	2	2	2	7.9	7.9	7.9	41.218	394	394	0	12.628	288290	3				44	326;881	True;True	344;921	570;1570	1108;3057;3058	1108;3057
sp|P47205|LPXC_PSEAE	sp|P47205|LPXC_PSEAE	1	1	1	>sp|P47205|LPXC_PSEAE UDP-3-O-acyl-N-acetylglucosamine deacetylase OS=Pseudomonas aeruginosa (strain ATCC 15692 / PAO1 / 1C / PRS 101 / LMG 12228) GN=lpxC PE=1 SV=2	1	1	1	1	4	4	4	33.435	303	303	0	6.5251	776040	1				45	737	TRUE	775	1309	2564	2564
sp|P53593|SUCC_PSEAE	sp|P53593|SUCC_PSEAE	10	10	10	>sp|P53593|SUCC_PSEAE Succinyl-CoA ligase [ADP-forming] subunit beta OS=Pseudomonas aeruginosa (strain ATCC 15692 / PAO1 / 1C / PRS 101 / LMG 12228) GN=sucC PE=3 SV=2	1	10	10	10	35.1	35.1	35.1	41.542	388	388	0	131.64	75382000	34				46	35;128;139;237;426;488;493;617;663;836	True;True;True;True;True;True;True;True;True;True	37;136;149;254;450;512;517;650;699;875	64;65;238;262;263;428;755;756;854;861;862;1096;1097;1174;1492;1493;1494;1495	144;145;515;516;574;575;576;577;859;1480;1481;1482;1483;1668;1684;1685;1686;1687;2162;2163;2164;2165;2166;2167;2289;2290;2879;2880;2881;2882;2883;2884;2885;2886	144;515;574;859;1482;1668;1685;2163;2289;2881
sp|P53641|SODF_PSEAE	sp|P53641|SODF_PSEAE	5	5	5	>sp|P53641|SODF_PSEAE Superoxide dismutase [Fe] OS=Pseudomonas aeruginosa (strain ATCC 15692 / PAO1 / 1C / PRS 101 / LMG 12228) GN=sodB PE=3 SV=3	1	5	5	5	29	29	29	21.351	193	193	0	40.309	49863000	24				47	38;275;696;769;925	True;True;True;True;True	40;293;733;807;965	68;69;487;1227;1228;1360;1361;1645;1646	148;149;150;151;152;153;154;970;2373;2374;2654;2655;2656;2657;2658;2659;2660;3208;3209;3210;3211;3212;3213;3214	151;970;2374;2655;3208
sp|P57112|STHA_PSEAE	sp|P57112|STHA_PSEAE	5	5	5	>sp|P57112|STHA_PSEAE Soluble pyridine nucleotide transhydrogenase OS=Pseudomonas aeruginosa (strain ATCC 15692 / PAO1 / 1C / PRS 101 / LMG 12228) GN=sthA PE=1 SV=2	1	5	5	5	13.1	13.1	13.1	51.16	464	464	0	29.984	4014800	6				48	110;334;564;779;801	True;True;True;True;True	117;353;589;817;839	207;584;989;1374;1426	471;1135;1941;2677;2678;2770	471;1135;1941;2677;2770
sp|P57668|TPX_PSEAE	sp|P57668|TPX_PSEAE	2	2	2	>sp|P57668|TPX_PSEAE Probable thiol peroxidase OS=Pseudomonas aeruginosa (strain ATCC 15692 / PAO1 / 1C / PRS 101 / LMG 12228) GN=tpx PE=3 SV=1	1	2	2	2	18.8	18.8	18.8	17.234	165	165	0	17.67	3089400	3				49	145;226	True;True	156;242	273;411;412	592;833;834	592;833
sp|P72173|AAT_PSEAE	sp|P72173|AAT_PSEAE	2	2	2	>sp|P72173|AAT_PSEAE Aspartate aminotransferase OS=Pseudomonas aeruginosa (strain ATCC 15692 / PAO1 / 1C / PRS 101 / LMG 12228) GN=aspC PE=3 SV=2	1	2	2	2	5.5	5.5	5.5	43.319	398	398	0	11.418	1072500	0				50	811;926	True;True	850;966	1442;1647	2801;3215	2801;3215
sp|Q51422|SYDND_PSEAE	sp|Q51422|SYDND_PSEAE	1	1	1	>sp|Q51422|SYDND_PSEAE Aspartate--tRNA(Asp/Asn) ligase OS=Pseudomonas aeruginosa (strain ATCC 15692 / PAO1 / 1C / PRS 101 / LMG 12228) GN=aspS PE=1 SV=2	1	1	1	1	2.2	2.2	2.2	66.207	591	591	0.0042373	5.7049	1119400	1				51	433	TRUE	457	768	1519	1519
sp|Q51561|RPOB_PSEAE	sp|Q51561|RPOB_PSEAE	2	2	2	>sp|Q51561|RPOB_PSEAE DNA-directed RNA polymerase subunit beta OS=Pseudomonas aeruginosa (strain ATCC 15692 / PAO1 / 1C / PRS 101 / LMG 12228) GN=rpoB PE=3 SV=2	1	2	2	2	2.7	2.7	2.7	150.84	1357	1357	0	15.377	2084000	2				52	53;667	True;True	56;703	96;1180	225;2301	225;2301
sp|Q51567|SUCD_PSEAE	sp|Q51567|SUCD_PSEAE	9	9	9	>sp|Q51567|SUCD_PSEAE Succinyl-CoA ligase [ADP-forming] subunit alpha OS=Pseudomonas aeruginosa (strain ATCC 15692 / PAO1 / 1C / PRS 101 / LMG 12228) GN=sucD PE=3 SV=2	1	9	9	9	43.1	43.1	43.1	30.266	295	295	0	62.498	47450000	25				53	65;97;194;263;319;336;494;580;692	True;True;True;True;True;True;True;True;True	70;104;209;281;337;355;518;607;729	121;122;184;361;362;466;467;556;587;863;864;1016;1221;1222	289;290;291;292;434;748;749;750;751;932;933;934;935;936;1078;1144;1145;1688;1689;1690;1691;1997;2362;2363;2364	290;434;748;935;1078;1145;1690;1997;2364
sp|Q59636|NDK_PSEAE	sp|Q59636|NDK_PSEAE	4	4	4	>sp|Q59636|NDK_PSEAE Nucleoside diphosphate kinase OS=Pseudomonas aeruginosa (strain ATCC 15692 / PAO1 / 1C / PRS 101 / LMG 12228) GN=ndk PE=3 SV=2	1	4	4	4	47.6	47.6	47.6	15.592	143	143	0	28.056	16140000	10				54	16;180;634;755	True;True;True;True	16;193;669;793	27;28;333;1128;1129;1338;1339	74;75;702;703;2208;2209;2210;2211;2629;2630	74;702;2209;2630
sp|Q59637|ODP1_PSEAE	sp|Q59637|ODP1_PSEAE	11	11	11	>sp|Q59637|ODP1_PSEAE Pyruvate dehydrogenase E1 component OS=Pseudomonas aeruginosa (strain ATCC 15692 / PAO1 / 1C / PRS 101 / LMG 12228) GN=aceE PE=3 SV=2	1	11	11	11	13.9	13.9	13.9	99.563	882	882	0	66.846	30186000	13				55	5;195;231;294;395;406;437;546;574;590;707	True;True;True;True;True;True;True;True;True;True;True	5;210;248;312;418;429;461;571;599;619;744	6;363;421;517;702;703;717;718;772;773;959;960;1004;1033;1244	8;752;852;1022;1380;1381;1399;1400;1524;1525;1886;1887;1966;2029;2397	8;752;852;1022;1381;1400;1524;1887;1966;2029;2397
sp|Q59638|ODP2_PSEAE	sp|Q59638|ODP2_PSEAE	5	5	5	>sp|Q59638|ODP2_PSEAE Dihydrolipoyllysine-residue acetyltransferase component of pyruvate dehydrogenase complex OS=Pseudomonas aeruginosa (strain ATCC 15692 / PAO1 / 1C / PRS 101 / LMG 12228) GN=aceF PE=2 SV=2	1	5	5	5	11.2	11.2	11.2	56.708	547	547	0	38.421	7275700	9				56	23;24;500;702;812	True;True;True;True;True	25;26;524;739;851	45;46;47;877;1236;1443;1444	116;117;118;119;120;1737;2385;2802;2803	118;119;1737;2385;2803
sp|Q9HT14|ATP6_PSEAE	sp|Q9HT14|ATP6_PSEAE	3	3	3	>sp|Q9HT14|ATP6_PSEAE ATP synthase subunit a OS=Pseudomonas aeruginosa (strain ATCC 15692 / PAO1 / 1C / PRS 101 / LMG 12228) GN=atpB PE=3 SV=1	1	3	3	3	17.6	17.6	17.6	31.92	289	289	0	17.271	8629800	6				57	131;439;548	True;True;True	139;463;573	246;776;777;963	528;529;1528;1529;1530;1891	528;1530;1891
sp|Q9HT16|ATPF_PSEAE	sp|Q9HT16|ATPF_PSEAE	5	5	5	>sp|Q9HT16|ATPF_PSEAE ATP synthase subunit b OS=Pseudomonas aeruginosa (strain ATCC 15692 / PAO1 / 1C / PRS 101 / LMG 12228) GN=atpF PE=3 SV=1	1	5	5	5	37.2	37.2	37.2	16.956	156	156	0	41.256	14350000	12				58	96;105;107;115;367	True;True;True;True;True	103;112;114;122;388	183;197;198;201;214;215;651;652	433;458;459;460;461;462;465;481;482;483;1292;1293	433;458;465;481;1292
sp|Q9HT18|ATPA_PSEAE	sp|Q9HT18|ATPA_PSEAE	13	13	13	>sp|Q9HT18|ATPA_PSEAE ATP synthase subunit alpha OS=Pseudomonas aeruginosa (strain ATCC 15692 / PAO1 / 1C / PRS 101 / LMG 12228) GN=atpA PE=3 SV=1	1	13	13	13	30	30	30	55.393	514	514	0	112.89	95541000	38				59	188;219;236;305;312;416;467;609;722;723;734;821;880	True;True;True;True;True;True;True;True;True;True;True;True;True	202;235;253;323;330;440;491;642;760;761;772;860;920	350;351;401;427;533;534;544;545;737;738;823;1080;1081;1279;1280;1281;1282;1304;1305;1462;1463;1464;1568;1569	735;736;816;858;1041;1042;1043;1044;1045;1061;1062;1063;1064;1447;1448;1449;1622;2139;2140;2141;2142;2483;2484;2485;2486;2487;2488;2489;2556;2557;2558;2559;2840;2841;2842;2843;3053;3054;3055;3056	736;816;858;1041;1061;1447;1622;2139;2483;2488;2556;2840;3054
sp|Q9HT19|ATPG_PSEAE	sp|Q9HT19|ATPG_PSEAE	3	3	3	>sp|Q9HT19|ATPG_PSEAE ATP synthase gamma chain OS=Pseudomonas aeruginosa (strain ATCC 15692 / PAO1 / 1C / PRS 101 / LMG 12228) GN=atpG PE=3 SV=1	1	3	3	3	16.1	16.1	16.1	31.553	286	286	0	19.046	4954400	5				60	688;701;823	True;True;True	725;738;862	1216;1234;1235;1466	2357;2383;2384;2845;2846	2357;2384;2846
sp|Q9HT20|ATPB_PSEAE	sp|Q9HT20|ATPB_PSEAE	14	14	14	>sp|Q9HT20|ATPB_PSEAE ATP synthase subunit beta OS=Pseudomonas aeruginosa (strain ATCC 15692 / PAO1 / 1C / PRS 101 / LMG 12228) GN=atpD PE=3 SV=1	1	14	14	14	47.6	47.6	47.6	49.499	458	458	0	122.52	59159000	27				61	167;168;200;216;284;324;351;424;661;693;784;785;818;924	True;True;True;True;True;True;True;True;True;True;True;True;True;True	178;179;215;232;302;342;371;448;697;730;822;823;857;964	310;311;369;397;398;505;564;565;621;751;752;1170;1171;1223;1382;1383;1384;1456;1457;1643;1644	650;651;652;653;761;762;812;813;1008;1096;1097;1233;1234;1235;1476;1477;2284;2285;2365;2690;2691;2692;2693;2694;2695;2833;2834;3206;3207	652;653;762;812;1008;1096;1233;1476;2285;2365;2693;2695;2834;3206
sp|Q9HT21|ATPE_PSEAE	sp|Q9HT21|ATPE_PSEAE	3	3	3	>sp|Q9HT21|ATPE_PSEAE ATP synthase epsilon chain OS=Pseudomonas aeruginosa (strain ATCC 15692 / PAO1 / 1C / PRS 101 / LMG 12228) GN=atpC PE=3 SV=1	1	3	3	3	24.8	24.8	24.8	14.726	141	141	0	19.595	3184200	5				62	42;296;470	True;True;True	44;314;494	75;520;827;828	164;1025;1026;1627;1628	164;1026;1628
sp|Q9HT95|ATSE4_PSEAE	sp|Q9HT95|ATSE4_PSEAE	1	1	1	>sp|Q9HT95|ATSE4_PSEAE Acetyltransferase PA5475 OS=Pseudomonas aeruginosa (strain ATCC 15692 / PAO1 / 1C / PRS 101 / LMG 12228) GN=PA5475 PE=3 SV=1	1	1	1	1	5.9	5.9	5.9	21	186	186	0.0043668	5.7849	729750	2				63	186	TRUE	200	346;347	731;732	732
sp|Q9HTD7|ASPA_PSEAE	sp|Q9HTD7|ASPA_PSEAE	6	6	6	>sp|Q9HTD7|ASPA_PSEAE Aspartate ammonia-lyase OS=Pseudomonas aeruginosa (strain ATCC 15692 / PAO1 / 1C / PRS 101 / LMG 12228) GN=aspA PE=3 SV=1	1	6	6	6	27	27	27	51.069	474	474	0	38.807	7784300	12				64	173;345;477;519;765;917	True;True;True;True;True;True	185;365;501;543;803;957	321;611;840;917;918;1352;1353;1632	672;1219;1646;1815;1816;1817;2644;2645;2646;2647;3192;3193	672;1219;1646;1815;2644;3192
sp|Q9HTN8|RL28_PSEAE	sp|Q9HTN8|RL28_PSEAE	1	1	1	>sp|Q9HTN8|RL28_PSEAE 50S ribosomal protein L28 OS=Pseudomonas aeruginosa (strain ATCC 15692 / PAO1 / 1C / PRS 101 / LMG 12228) GN=rpmB PE=3 SV=1	1	1	1	1	12.8	12.8	12.8	9.0655	78	78	0	7.237	9495800	6				65	323	TRUE	341	562;563	1090;1091;1092;1093;1094;1095	1093
sp|Q9HU21|RMLC_PSEAE	sp|Q9HU21|RMLC_PSEAE	1	1	1	>sp|Q9HU21|RMLC_PSEAE dTDP-4-dehydrorhamnose 3,5-epimerase OS=Pseudomonas aeruginosa (strain ATCC 15692 / PAO1 / 1C / PRS 101 / LMG 12228) GN=rmlC PE=1 SV=1	1	1	1	1	7.7	7.7	7.7	20.766	181	181	0	6.6857	785880	1				66	383	TRUE	405	681	1331	1331
sp|Q9HU65|GLNA_PSEAE	sp|Q9HU65|GLNA_PSEAE	4	4	4	>sp|Q9HU65|GLNA_PSEAE Glutamine synthetase OS=Pseudomonas aeruginosa (strain ATCC 15692 / PAO1 / 1C / PRS 101 / LMG 12228) GN=glnA PE=1 SV=1	1	4	4	4	16.2	16.2	16.2	51.944	469	469	0	27.093	5751300	9				67	78;153;287;630	True;True;True;True	83;164;305;665	143;144;287;508;1120;1121;1122	328;329;612;1011;2197;2198;2199;2200;2201	328;612;1011;2201
sp|Q9HUC5|HSLU_PSEAE	sp|Q9HUC5|HSLU_PSEAE	4	4	4	>sp|Q9HUC5|HSLU_PSEAE ATP-dependent protease ATPase subunit HslU OS=Pseudomonas aeruginosa (strain ATCC 15692 / PAO1 / 1C / PRS 101 / LMG 12228) GN=hslU PE=3 SV=1	1	4	4	4	10.1	10.1	10.1	50.082	447	447	0	23.113	5878300	3				68	83;415;641;738	True;True;True;True	88;439;677;776	154;736;1141;1310;1311	356;1446;2238;2565;2566	356;1446;2238;2565
sp|Q9HUC8|SYR_PSEAE	sp|Q9HUC8|SYR_PSEAE	1	1	1	>sp|Q9HUC8|SYR_PSEAE Arginine--tRNA ligase OS=Pseudomonas aeruginosa (strain ATCC 15692 / PAO1 / 1C / PRS 101 / LMG 12228) GN=argS PE=3 SV=1	1	1	1	1	2	2	2	65.199	587	587	0	6.5514	711290	1				69	751	TRUE	789	1332	2621	2621
sp|Q9HUM6|PURA_PSEAE	sp|Q9HUM6|PURA_PSEAE	3	3	3	>sp|Q9HUM6|PURA_PSEAE Adenylosuccinate synthetase OS=Pseudomonas aeruginosa (strain ATCC 15692 / PAO1 / 1C / PRS 101 / LMG 12228) GN=purA PE=3 SV=1	1	3	3	3	8.1	8.1	8.1	46.814	430	430	0	19.929	4179600	2				70	447;485;749	True;True;True	471;509;787	790;791;851;1329	1556;1557;1665;2618	1557;1665;2618
sp|Q9HUM9|RS6_PSEAE	sp|Q9HUM9|RS6_PSEAE	1	1	1	>sp|Q9HUM9|RS6_PSEAE 30S ribosomal protein S6 OS=Pseudomonas aeruginosa (strain ATCC 15692 / PAO1 / 1C / PRS 101 / LMG 12228) GN=rpsF PE=3 SV=1	1	1	1	1	7.2	7.2	7.2	16.164	139	139	0	7.8892	6197600	5				71	64	TRUE	69	119;120	284;285;286;287;288	284
sp|Q9HUN0|RS18_PSEAE	sp|Q9HUN0|RS18_PSEAE	1	1	1	>sp|Q9HUN0|RS18_PSEAE 30S ribosomal protein S18 OS=Pseudomonas aeruginosa (strain ATCC 15692 / PAO1 / 1C / PRS 101 / LMG 12228) GN=rpsR PE=3 SV=1	1	1	1	1	17.1	17.1	17.1	8.8732	76	76	0	7.1736	7520200	2				72	915	TRUE	955	1628;1629	3185;3186	3186
sp|Q9HUN2|RL9_PSEAE	sp|Q9HUN2|RL9_PSEAE	1	1	1	>sp|Q9HUN2|RL9_PSEAE 50S ribosomal protein L9 OS=Pseudomonas aeruginosa (strain ATCC 15692 / PAO1 / 1C / PRS 101 / LMG 12228) GN=rplI PE=3 SV=1	1	1	1	1	13.5	13.5	13.5	15.532	148	148	0	5.9609	1578100	1				73	8	TRUE	8	12	16	16
sp|Q9HV43|DNAK_PSEAE	sp|Q9HV43|DNAK_PSEAE	12	12	12	>sp|Q9HV43|DNAK_PSEAE Chaperone protein DnaK OS=Pseudomonas aeruginosa (strain ATCC 15692 / PAO1 / 1C / PRS 101 / LMG 12228) GN=dnaK PE=3 SV=1	1	12	12	12	26.7	26.7	26.7	68.402	637	637	0	106.99	45625000	30				74	22;72;126;151;456;511;589;597;649;669;774;775	True;True;True;True;True;True;True;True;True;True;True;True	24;77;134;162;480;535;618;628;685;705;812;813	44;135;136;235;236;283;802;892;893;894;895;1031;1032;1050;1051;1052;1153;1154;1183;1368;1369	115;315;316;317;318;512;513;608;1571;1572;1573;1574;1758;1759;1760;1761;2025;2026;2027;2028;2063;2064;2065;2066;2067;2254;2255;2256;2306;2668;2669;2670	115;317;513;608;1571;1761;2027;2064;2254;2306;2668;2669
sp|Q9HV55|IF2_PSEAE	sp|Q9HV55|IF2_PSEAE	1	1	1	>sp|Q9HV55|IF2_PSEAE Translation initiation factor IF-2 OS=Pseudomonas aeruginosa (strain ATCC 15692 / PAO1 / 1C / PRS 101 / LMG 12228) GN=infB PE=3 SV=1	1	1	1	1	1.4	1.4	1.4	90.911	840	840	0	5.8237	447140	1				75	379	TRUE	400	672	1316	1316
sp|Q9HV59|PNP_PSEAE	sp|Q9HV59|PNP_PSEAE	4	4	4	>sp|Q9HV59|PNP_PSEAE Polyribonucleotide nucleotidyltransferase OS=Pseudomonas aeruginosa (strain ATCC 15692 / PAO1 / 1C / PRS 101 / LMG 12228) GN=pnp PE=3 SV=1	1	4	4	4	7.3	7.3	7.3	75.452	701	701	0	24.443	4270900	6				76	98;197;425;848	True;True;True;True	105;212;449;887	185;365;753;754;1512	435;436;754;1478;1479;2912	436;754;1478;2912
sp|Q9HVA2|ILVC_PSEAE	sp|Q9HVA2|ILVC_PSEAE	3	3	3	>sp|Q9HVA2|ILVC_PSEAE Ketol-acid reductoisomerase OS=Pseudomonas aeruginosa (strain ATCC 15692 / PAO1 / 1C / PRS 101 / LMG 12228) GN=ilvC PE=1 SV=1	1	3	3	3	11.8	11.8	11.8	36.424	338	338	0	25.595	10651000	7				77	18;92;317	True;True;True	18;99;335	30;31;175;552;553	78;79;401;1071;1072;1073;1074;1075	78;401;1071
sp|Q9HVC4|RL25_PSEAE	sp|Q9HVC4|RL25_PSEAE	5	5	5	>sp|Q9HVC4|RL25_PSEAE 50S ribosomal protein L25 OS=Pseudomonas aeruginosa (strain ATCC 15692 / PAO1 / 1C / PRS 101 / LMG 12228) GN=rplY PE=3 SV=1	1	5	5	5	44.6	44.6	44.6	21.962	204	204	0	36.023	29074000	10				78	176;346;522;603;804	True;True;True;True;True	189;366;546;636;842	329;612;922;923;1064;1430;1431;1432	697;1220;1822;1823;2084;2085;2775;2776;2777;2778	697;1220;1823;2084;2775
sp|Q9HVL6|RL21_PSEAE	sp|Q9HVL6|RL21_PSEAE	1	1	1	>sp|Q9HVL6|RL21_PSEAE 50S ribosomal protein L21 OS=Pseudomonas aeruginosa (strain ATCC 15692 / PAO1 / 1C / PRS 101 / LMG 12228) GN=rplU PE=3 SV=1	1	1	1	1	10.7	10.7	10.7	11.653	103	103	0	6.3794	1258300	2				79	846	TRUE	885	1510	2909;2910	2910
sp|Q9HVM1|RS20_PSEAE	sp|Q9HVM1|RS20_PSEAE	1	1	1	>sp|Q9HVM1|RS20_PSEAE 30S ribosomal protein S20 OS=Pseudomonas aeruginosa (strain ATCC 15692 / PAO1 / 1C / PRS 101 / LMG 12228) GN=rpsT PE=1 SV=3	1	1	1	1	15.4	15.4	15.4	9.9175	91	91	0	7.0195	5277800	2				80	106	TRUE	113	199;200	463;464	463
sp|Q9HVM4|SYI_PSEAE	sp|Q9HVM4|SYI_PSEAE	1	1	1	>sp|Q9HVM4|SYI_PSEAE Isoleucine--tRNA ligase OS=Pseudomonas aeruginosa (strain ATCC 15692 / PAO1 / 1C / PRS 101 / LMG 12228) GN=ileS PE=3 SV=1	1	1	1	1	1.2	1.2	1.2	105.46	943	943	0	5.989	0	1				81	259	TRUE	277	461	924	924
sp|Q9HVN5|CLPB_PSEAE	sp|Q9HVN5|CLPB_PSEAE	6	4	4	>sp|Q9HVN5|CLPB_PSEAE Chaperone protein ClpB OS=Pseudomonas aeruginosa (strain ATCC 15692 / PAO1 / 1C / PRS 101 / LMG 12228) GN=clpB PE=3 SV=1	1	6	4	4	9.1	6.4	6.4	95.004	854	854	0	22.929	952730	4				82	33;63;315;624;732;894	True;True;True;False;False;True	35;68;333;658;770;934	61;118;550;1110;1301;1302;1591	139;283;1069;2184;2185;2552;2553;2554;3096	139;283;1069;2184;2553;3096
sp|Q9HVY3|RS9_PSEAE	sp|Q9HVY3|RS9_PSEAE	1	1	1	>sp|Q9HVY3|RS9_PSEAE 30S ribosomal protein S9 OS=Pseudomonas aeruginosa (strain ATCC 15692 / PAO1 / 1C / PRS 101 / LMG 12228) GN=rpsI PE=3 SV=1	1	1	1	1	7.7	7.7	7.7	14.615	130	130	0	5.8422	1279200	1				83	75	TRUE	80	139	321	321
sp|Q9HW11|Y4395_PSEAE	sp|Q9HW11|Y4395_PSEAE	2	2	2	>sp|Q9HW11|Y4395_PSEAE UPF0234 protein PA4395 OS=Pseudomonas aeruginosa (strain ATCC 15692 / PAO1 / 1C / PRS 101 / LMG 12228) GN=PA4395 PE=3 SV=1	1	2	2	2	21.4	21.4	21.4	18.044	159	159	0	15.211	5666100	5				84	642;865	True;True	678;904	1142;1541;1542	2239;2981;2982;2983;2984	2239;2981
sp|Q9HWC5|RL11_PSEAE	sp|Q9HWC5|RL11_PSEAE	2	2	2	>sp|Q9HWC5|RL11_PSEAE 50S ribosomal protein L11 OS=Pseudomonas aeruginosa (strain ATCC 15692 / PAO1 / 1C / PRS 101 / LMG 12228) GN=rplK PE=3 SV=1	1	2	2	2	15.4	15.4	15.4	14.907	143	143	0	18.374	3974300	2				85	111;643	True;True	118;679	208;1143;1144	472;2240;2241	472;2240
sp|Q9HWC6|RL1_PSEAE	sp|Q9HWC6|RL1_PSEAE	2	2	2	>sp|Q9HWC6|RL1_PSEAE 50S ribosomal protein L1 OS=Pseudomonas aeruginosa (strain ATCC 15692 / PAO1 / 1C / PRS 101 / LMG 12228) GN=rplA PE=3 SV=1	1	2	2	2	11.3	11.3	11.3	24.234	231	231	0	13.31	2936400	2				86	550;885	True;True	575;925	965;1575	1894;3070	1894;3070
sp|Q9HWC7|RL10_PSEAE	sp|Q9HWC7|RL10_PSEAE	2	2	2	>sp|Q9HWC7|RL10_PSEAE 50S ribosomal protein L10 OS=Pseudomonas aeruginosa (strain ATCC 15692 / PAO1 / 1C / PRS 101 / LMG 12228) GN=rplJ PE=3 SV=1	1	2	2	2	15.7	15.7	15.7	17.634	166	166	0	12.445	1753500	1				87	6;137	True;True	6;147	7;259	9;570	9;570
sp|Q9HWC8|RL7_PSEAE	sp|Q9HWC8|RL7_PSEAE	2	2	2	>sp|Q9HWC8|RL7_PSEAE 50S ribosomal protein L7/L12 OS=Pseudomonas aeruginosa (strain ATCC 15692 / PAO1 / 1C / PRS 101 / LMG 12228) GN=rplL PE=3 SV=1	1	2	2	2	28.7	28.7	28.7	12.479	122	122	0	13.125	11426000	9				88	84;143	True;True	89;154	155;156;270;271	357;358;359;585;586;587;588;589;590	358;585
sp|Q9HWC9|RPOC_PSEAE	sp|Q9HWC9|RPOC_PSEAE	6	6	6	>sp|Q9HWC9|RPOC_PSEAE DNA-directed RNA polymerase subunit beta OS=Pseudomonas aeruginosa (strain ATCC 15692 / PAO1 / 1C / PRS 101 / LMG 12228) GN=rpoC PE=3 SV=1	1	6	6	6	6.4	6.4	6.4	154.38	1399	1399	0	39.489	8409300	6				89	174;241;405;507;520;629	True;True;True;True;True;True	186;258;428;531;544;664	322;434;716;887;919;1118;1119	673;865;1398;1753;1818;2194;2195;2196	673;865;1398;1753;1818;2194
sp|Q9HWD1|RS7_PSEAE	sp|Q9HWD1|RS7_PSEAE	3	3	3	>sp|Q9HWD1|RS7_PSEAE 30S ribosomal protein S7 OS=Pseudomonas aeruginosa (strain ATCC 15692 / PAO1 / 1C / PRS 101 / LMG 12228) GN=rpsG PE=3 SV=1	1	3	3	3	25.6	25.6	25.6	17.504	156	156	0	23.552	16469000	8				90	66;473;817	True;True;True	71;497;856	123;124;834;1454;1455	293;294;295;1639;2829;2830;2831;2832	294;1639;2832
sp|Q9HWD2|EFG1_PSEAE;sp|Q9I244|EFG2_PSEAE	sp|Q9HWD2|EFG1_PSEAE	20;6	20;6	20;6	>sp|Q9HWD2|EFG1_PSEAE Elongation factor G 1 OS=Pseudomonas aeruginosa (strain ATCC 15692 / PAO1 / 1C / PRS 101 / LMG 12228) GN=fusA PE=1 SV=1	2	20	20	20	43.8	43.8	43.8	77.784	706	706;702	0	190.53	120920000	67				91	32;41;127;133;225;290;327;330;350;352;375;478;501;505;575;611;808;891;899;916	True;True;True;True;True;True;True;True;True;True;True;True;True;True;True;True;True;True;True;True	34;43;135;141;241;308;345;348;370;372;396;502;525;529;600;601;644;846;931;939;956	58;59;60;73;74;237;249;409;410;511;512;571;572;576;618;619;620;622;623;665;666;841;842;878;884;885;1005;1006;1007;1008;1084;1085;1436;1437;1585;1586;1598;1599;1630;1631	133;134;135;136;137;138;160;161;162;163;514;543;831;832;1014;1015;1016;1109;1110;1111;1118;1119;1226;1227;1228;1229;1230;1231;1232;1236;1237;1238;1239;1308;1309;1310;1647;1648;1649;1650;1651;1652;1653;1738;1748;1749;1750;1751;1967;1968;1969;1970;1971;2146;2147;2782;2783;2784;2785;3085;3086;3087;3088;3104;3105;3106;3107;3187;3188;3189;3190;3191	133;160;514;543;831;1014;1111;1118;1228;1239;1308;1651;1738;1748;1967;2146;2782;3087;3104;3189	26	409
sp|Q9HWD4|RS10_PSEAE	sp|Q9HWD4|RS10_PSEAE	1	1	1	>sp|Q9HWD4|RS10_PSEAE 30S ribosomal protein S10 OS=Pseudomonas aeruginosa (strain ATCC 15692 / PAO1 / 1C / PRS 101 / LMG 12228) GN=rpsJ PE=3 SV=1	1	1	1	1	13.6	13.6	13.6	11.766	103	103	0	6.2749	938820	1				92	510	TRUE	534	891	1757	1757
sp|Q9HWD5|RL3_PSEAE	sp|Q9HWD5|RL3_PSEAE	2	2	2	>sp|Q9HWD5|RL3_PSEAE 50S ribosomal protein L3 OS=Pseudomonas aeruginosa (strain ATCC 15692 / PAO1 / 1C / PRS 101 / LMG 12228) GN=rplC PE=3 SV=1	1	2	2	2	14.2	14.2	14.2	22.591	211	211	0	15.682	17364000	4				93	393;879	True;True	416;919	699;1566;1567	1377;3050;3051;3052	1377;3051
sp|Q9HWD6|RL4_PSEAE	sp|Q9HWD6|RL4_PSEAE	2	2	2	>sp|Q9HWD6|RL4_PSEAE 50S ribosomal protein L4 OS=Pseudomonas aeruginosa (strain ATCC 15692 / PAO1 / 1C / PRS 101 / LMG 12228) GN=rplD PE=3 SV=1	1	2	2	2	11.5	11.5	11.5	21.64	200	200	0	13.48	3409800	2				94	206;694	True;True	221;731	377;1224	781;2366	781;2366
sp|Q9HWD8|RL2_PSEAE	sp|Q9HWD8|RL2_PSEAE	5	5	5	>sp|Q9HWD8|RL2_PSEAE 50S ribosomal protein L2 OS=Pseudomonas aeruginosa (strain ATCC 15692 / PAO1 / 1C / PRS 101 / LMG 12228) GN=rplB PE=3 SV=1	1	5	5	5	25.6	25.6	25.6	29.579	273	273	0	45.022	28509000	13				95	129;340;342;614;673	True;True;True;True;True	137;360;362;647;709	239;240;241;242;604;605;607;1090;1091;1191;1192	517;518;519;520;521;522;1207;1208;1209;1211;2154;2155;2319;2320	519;1207;1211;2154;2320
sp|Q9HWD9|RS19_PSEAE	sp|Q9HWD9|RS19_PSEAE	1	1	1	>sp|Q9HWD9|RS19_PSEAE 30S ribosomal protein S19 OS=Pseudomonas aeruginosa (strain ATCC 15692 / PAO1 / 1C / PRS 101 / LMG 12228) GN=rpsS PE=3 SV=1	1	1	1	1	12.1	12.1	12.1	10.357	91	91	0	5.8471	1223300	1				96	807	TRUE	845	1435	2781	2781
sp|Q9HWE0|RL22_PSEAE	sp|Q9HWE0|RL22_PSEAE	3	3	3	>sp|Q9HWE0|RL22_PSEAE 50S ribosomal protein L22 OS=Pseudomonas aeruginosa (strain ATCC 15692 / PAO1 / 1C / PRS 101 / LMG 12228) GN=rplV PE=3 SV=1	1	3	3	3	40	40	40	11.911	110	110	0	26.374	23902000	15				97	815;842;875	True;True;True	854;881;915	1450;1451;1503;1504;1561;1562	2822;2823;2824;2898;2899;2900;2901;2902;3039;3040;3041;3042;3043;3044;3045	2822;2898;3040
sp|Q9HWE1|RS3_PSEAE	sp|Q9HWE1|RS3_PSEAE	5	5	5	>sp|Q9HWE1|RS3_PSEAE 30S ribosomal protein S3 OS=Pseudomonas aeruginosa (strain ATCC 15692 / PAO1 / 1C / PRS 101 / LMG 12228) GN=rpsC PE=3 SV=1	1	5	5	5	32	32	32	25.838	228	228	0	32.517	13167000	7				98	17;378;463;636;651	True;True;True;True;True	17;399;487;671;687	29;671;817;818;1131;1132;1157	76;77;1315;1615;1616;1617;2213;2214;2259	76;1315;1615;2214;2259
sp|Q9HWE2|RL16_PSEAE	sp|Q9HWE2|RL16_PSEAE	3	3	3	>sp|Q9HWE2|RL16_PSEAE 50S ribosomal protein L16 OS=Pseudomonas aeruginosa (strain ATCC 15692 / PAO1 / 1C / PRS 101 / LMG 12228) GN=rplP PE=3 SV=1	1	3	3	3	23.4	23.4	23.4	15.401	137	137	0	24.635	27578000	7				99	547;849;874	True;True;True	572;888;914	961;962;1513;1514;1559;1560	1888;1889;1890;2913;2914;3037;3038	1890;2913;3038
sp|Q9HWE4|RS17_PSEAE	sp|Q9HWE4|RS17_PSEAE	1	1	1	>sp|Q9HWE4|RS17_PSEAE 30S ribosomal protein S17 OS=Pseudomonas aeruginosa (strain ATCC 15692 / PAO1 / 1C / PRS 101 / LMG 12228) GN=rpsQ PE=3 SV=1	1	1	1	1	11.4	11.4	11.4	10.086	88	88	0	6.0047	4532900	3				100	146	TRUE	157	274;275	593;594;595	593
sp|Q9HWE5|RL14_PSEAE	sp|Q9HWE5|RL14_PSEAE	3	3	3	>sp|Q9HWE5|RL14_PSEAE 50S ribosomal protein L14 OS=Pseudomonas aeruginosa (strain ATCC 15692 / PAO1 / 1C / PRS 101 / LMG 12228) GN=rplN PE=3 SV=1	1	3	3	3	31.1	31.1	31.1	13.412	122	122	0	21.098	8588200	7				101	267;584;900	True;True;True	285;611;940	474;475;1020;1600	948;949;950;951;952;2001;3108	948;2001;3108
sp|Q9HWE7|RL5_PSEAE	sp|Q9HWE7|RL5_PSEAE	5	5	5	>sp|Q9HWE7|RL5_PSEAE 50S ribosomal protein L5 OS=Pseudomonas aeruginosa (strain ATCC 15692 / PAO1 / 1C / PRS 101 / LMG 12228) GN=rplE PE=3 SV=1	1	5	5	5	37.4	37.4	37.4	20.392	179	179	0	28.354	6707400	5				102	250;440;441;516;528	True;True;True;True;True	268;464;465;540;552	450;778;779;912;930	905;1531;1532;1810;1830	905;1531;1532;1810;1830
sp|Q9HWE8|RS14_PSEAE	sp|Q9HWE8|RS14_PSEAE	3	3	3	>sp|Q9HWE8|RS14_PSEAE 30S ribosomal protein S14 OS=Pseudomonas aeruginosa (strain ATCC 15692 / PAO1 / 1C / PRS 101 / LMG 12228) GN=rpsN PE=3 SV=1	1	3	3	3	29.7	29.7	29.7	11.565	101	101	0	26.462	25167000	11				103	57;307;896	True;True;True	62;325;936	110;111;537;1594	268;269;270;271;272;273;274;275;276;1054;3099	269;1054;3099
sp|Q9HWE9|RS8_PSEAE	sp|Q9HWE9|RS8_PSEAE	3	3	3	>sp|Q9HWE9|RS8_PSEAE 30S ribosomal protein S8 OS=Pseudomonas aeruginosa (strain ATCC 15692 / PAO1 / 1C / PRS 101 / LMG 12228) GN=rpsH PE=3 SV=1	1	3	3	3	28.5	28.5	28.5	14.17	130	130	0	20.326	15049000	5				104	318;706;908	True;True;True	336;743;948	554;555;1242;1243;1616	1076;1077;2395;2396;3159	1077;2395;3159
sp|Q9HWF0|RL6_PSEAE	sp|Q9HWF0|RL6_PSEAE	1	1	1	>sp|Q9HWF0|RL6_PSEAE 50S ribosomal protein L6 OS=Pseudomonas aeruginosa (strain ATCC 15692 / PAO1 / 1C / PRS 101 / LMG 12228) GN=rplF PE=3 SV=1	1	1	1	1	9	9	9	19.099	177	177	0	5.8173	1209400	1				105	85	TRUE	90	157	360	360
sp|Q9HWF1|RL18_PSEAE	sp|Q9HWF1|RL18_PSEAE	3	3	3	>sp|Q9HWF1|RL18_PSEAE 50S ribosomal protein L18 OS=Pseudomonas aeruginosa (strain ATCC 15692 / PAO1 / 1C / PRS 101 / LMG 12228) GN=rplR PE=3 SV=1	1	3	3	3	31.9	31.9	31.9	12.661	116	116	0	19.807	6233900	5				106	2;716;837	True;True;True	2;754;876	2;3;1268;1496	2;3;4;2452;2887	2;2452;2887
sp|Q9HWF2|RS5_PSEAE	sp|Q9HWF2|RS5_PSEAE	4	4	4	>sp|Q9HWF2|RS5_PSEAE 30S ribosomal protein S5 OS=Pseudomonas aeruginosa (strain ATCC 15692 / PAO1 / 1C / PRS 101 / LMG 12228) GN=rpsE PE=3 SV=1	1	4	4	4	34.9	34.9	34.9	17.625	166	166	0	42.155	22555000	11				107	138;391;619;890	True;True;True;True	148;413;652;930	260;261;693;694;1100;1101;1582;1583;1584	571;572;573;1355;1356;2170;2171;3081;3082;3083;3084	571;1355;2170;3082
sp|Q9HWF4|RL15_PSEAE	sp|Q9HWF4|RL15_PSEAE	1	1	1	>sp|Q9HWF4|RL15_PSEAE 50S ribosomal protein L15 OS=Pseudomonas aeruginosa (strain ATCC 15692 / PAO1 / 1C / PRS 101 / LMG 12228) GN=rplO PE=3 SV=1	1	1	1	1	8.3	8.3	8.3	15.174	144	144	0	6.0231	3928300	2				108	800	TRUE	838	1424;1425	2768;2769	2769
sp|Q9HWF7|RS13_PSEAE	sp|Q9HWF7|RS13_PSEAE	2	2	2	>sp|Q9HWF7|RS13_PSEAE 30S ribosomal protein S13 OS=Pseudomonas aeruginosa (strain ATCC 15692 / PAO1 / 1C / PRS 101 / LMG 12228) GN=rpsM PE=3 SV=1	1	2	2	2	19.5	19.5	19.5	13.265	118	118	0	16.14	11060000	4				109	371;411	True;True	392;435	659;660;730;731	1302;1303;1439;1440	1302;1439
sp|Q9HWZ6|IPYR_PSEAE	sp|Q9HWZ6|IPYR_PSEAE	1	1	1	>sp|Q9HWZ6|IPYR_PSEAE Inorganic pyrophosphatase OS=Pseudomonas aeruginosa (strain ATCC 15692 / PAO1 / 1C / PRS 101 / LMG 12228) GN=ppa PE=1 SV=1	1	1	1	1	8	8	8	19.396	175	175	0	8.7993	726490	1				110	262	TRUE	280	465	931	931
sp|Q9HX33|SYL_PSEAE	sp|Q9HX33|SYL_PSEAE	1	1	1	>sp|Q9HX33|SYL_PSEAE Leucine--tRNA ligase OS=Pseudomonas aeruginosa (strain ATCC 15692 / PAO1 / 1C / PRS 101 / LMG 12228) GN=leuS PE=3 SV=1	1	1	1	1	1.5	1.5	1.5	97.647	873	873	0.0042735	5.7232	297090	1				111	320	TRUE	338	557	1079	1079
sp|Q9HXI2|SECF_PSEAE	sp|Q9HXI2|SECF_PSEAE	1	1	1	>sp|Q9HXI2|SECF_PSEAE Protein translocase subunit SecF OS=Pseudomonas aeruginosa (strain ATCC 15692 / PAO1 / 1C / PRS 101 / LMG 12228) GN=secF PE=3 SV=1	1	1	1	1	5.2	5.2	5.2	33.041	306	306	0	5.8919	6581200	1				112	202	TRUE	217	372	776	776	27	89
sp|Q9HXQ2|RL19_PSEAE	sp|Q9HXQ2|RL19_PSEAE	1	1	1	>sp|Q9HXQ2|RL19_PSEAE 50S ribosomal protein L19 OS=Pseudomonas aeruginosa (strain ATCC 15692 / PAO1 / 1C / PRS 101 / LMG 12228) GN=rplS PE=3 SV=1	1	1	1	1	10.3	10.3	10.3	13.032	116	116	0	8.7792	784250	2				113	407	TRUE	430	719	1401;1402	1402
sp|Q9HXV4|KAD_PSEAE	sp|Q9HXV4|KAD_PSEAE	3	3	3	>sp|Q9HXV4|KAD_PSEAE Adenylate kinase OS=Pseudomonas aeruginosa (strain ATCC 15692 / PAO1 / 1C / PRS 101 / LMG 12228) GN=adk PE=3 SV=1	1	3	3	3	17.7	17.7	17.7	23.107	215	215	0	16.886	3092100	2				114	271;311;913	True;True;True	289;329;953	482;542;543;1625	960;1059;1060;3181	960;1059;3181
sp|Q9HXZ4|PYRG_PSEAE	sp|Q9HXZ4|PYRG_PSEAE	1	1	1	>sp|Q9HXZ4|PYRG_PSEAE CTP synthase OS=Pseudomonas aeruginosa (strain ATCC 15692 / PAO1 / 1C / PRS 101 / LMG 12228) GN=pyrG PE=3 SV=1	1	1	1	1	2.4	2.4	2.4	59.617	542	542	0	6.8487	314430	1				115	773	TRUE	811	1367	2667	2667
sp|Q9HXZ5|ENO_PSEAE	sp|Q9HXZ5|ENO_PSEAE	4	4	4	>sp|Q9HXZ5|ENO_PSEAE Enolase OS=Pseudomonas aeruginosa (strain ATCC 15692 / PAO1 / 1C / PRS 101 / LMG 12228) GN=eno PE=3 SV=1	1	4	4	4	14.7	14.7	14.7	45.195	429	429	0	46.557	14036000	8				116	135;689;809;869	True;True;True;True	145;726;847;908	256;257;1217;1218;1438;1547;1548	567;568;2358;2359;2786;2995;2996;2997	568;2358;2786;2995
sp|Q9HYR9|CLPP2_PSEAE	sp|Q9HYR9|CLPP2_PSEAE	1	1	1	>sp|Q9HYR9|CLPP2_PSEAE ATP-dependent Clp protease proteolytic subunit 2 OS=Pseudomonas aeruginosa (strain ATCC 15692 / PAO1 / 1C / PRS 101 / LMG 12228) GN=clpP2 PE=3 SV=1	1	1	1	1	6	6	6	22.142	201	201	0	13.712	3430000	3				117	390	TRUE	412	691;692	1352;1353;1354	1352
sp|Q9HZ71|RS1_PSEAE	sp|Q9HZ71|RS1_PSEAE	11	11	11	>sp|Q9HZ71|RS1_PSEAE 30S ribosomal protein S1 OS=Pseudomonas aeruginosa (strain ATCC 15692 / PAO1 / 1C / PRS 101 / LMG 12228) GN=rpsA PE=3 SV=1	1	11	11	11	29.3	29.3	29.3	61.869	559	559	0	101.05	69035000	25				118	39;215;302;316;465;662;681;685;710;725;813	True;True;True;True;True;True;True;True;True;True;True	41;231;320;334;489;698;718;722;747;763;852	70;71;395;396;528;529;551;820;1172;1173;1207;1211;1212;1248;1285;1286;1445	155;156;157;158;810;811;1034;1035;1036;1037;1070;1619;2286;2287;2288;2345;2350;2351;2352;2401;2493;2494;2495;2496;2497;2804	156;810;1034;1070;1619;2287;2345;2350;2401;2494;2804
sp|Q9HZE0|DHE2_PSEAE	sp|Q9HZE0|DHE2_PSEAE	3	3	3	>sp|Q9HZE0|DHE2_PSEAE NAD-specific glutamate dehydrogenase OS=Pseudomonas aeruginosa (strain ATCC 15692 / PAO1 / 1C / PRS 101 / LMG 12228) GN=gdhB PE=1 SV=1	1	3	3	3	2.7	2.7	2.7	182.64	1620	1620	0	19.943	6972100	11				119	155;238;824	True;True;True	166;255;863	290;291;292;293;429;430;1467	620;621;622;623;624;625;626;627;628;860;861;2847	620;861;2847
sp|Q9HZP6|ETFB_PSEAE	sp|Q9HZP6|ETFB_PSEAE	4	4	4	>sp|Q9HZP6|ETFB_PSEAE Electron transfer flavoprotein subunit beta OS=Pseudomonas aeruginosa (strain ATCC 15692 / PAO1 / 1C / PRS 101 / LMG 12228) GN=etfB PE=3 SV=1	1	4	4	4	21.3	21.3	21.3	26.376	249	249	0	26.474	5009600	5				120	233;251;733;806	True;True;True;True	250;269;771;844	423;424;451;1303;1434	854;855;906;2555;2780	854;906;2555;2780
sp|Q9HZZ2|EFP_PSEAE	sp|Q9HZZ2|EFP_PSEAE	2	2	2	>sp|Q9HZZ2|EFP_PSEAE Elongation factor P OS=Pseudomonas aeruginosa (strain ATCC 15692 / PAO1 / 1C / PRS 101 / LMG 12228) GN=efp PE=1 SV=1	1	2	2	2	12.8	12.8	12.8	20.985	188	188	0	13.717	11666000	4				121	15;829	True;True	15;868	24;25;26;1475;1476	71;72;73;2861;2862	71;2862
sp|Q9I047|TAL_PSEAE	sp|Q9I047|TAL_PSEAE	1	1	1	>sp|Q9I047|TAL_PSEAE Transaldolase OS=Pseudomonas aeruginosa (strain ATCC 15692 / PAO1 / 1C / PRS 101 / LMG 12228) GN=tal PE=3 SV=1	1	1	1	1	4.9	4.9	4.9	33.946	307	307	0	6.7566	317250	1				122	208	TRUE	223	380	784	784
sp|Q9I0A0|IF3_PSEAE	sp|Q9I0A0|IF3_PSEAE	3	3	3	>sp|Q9I0A0|IF3_PSEAE Translation initiation factor IF-3 OS=Pseudomonas aeruginosa (strain ATCC 15692 / PAO1 / 1C / PRS 101 / LMG 12228) GN=infC PE=3 SV=1	1	3	3	3	23.5	23.5	23.5	20.882	183	183	0	16.866	2945500	3				123	113;289;794	True;True;True	120;307;832	211;510;1414	478;1013;2753	478;1013;2753
sp|Q9I0K0|NUOB_PSEAE	sp|Q9I0K0|NUOB_PSEAE	1	1	1	>sp|Q9I0K0|NUOB_PSEAE NADH-quinone oxidoreductase subunit B OS=Pseudomonas aeruginosa (strain ATCC 15692 / PAO1 / 1C / PRS 101 / LMG 12228) GN=nuoB PE=3 SV=1	1	1	1	1	6.7	6.7	6.7	25.425	225	225	0	5.9039	612280	1				124	380	TRUE	401	673	1317	1317
sp|Q9I0K4|ACEA_PSEAE	sp|Q9I0K4|ACEA_PSEAE	4	4	4	>sp|Q9I0K4|ACEA_PSEAE Isocitrate lyase OS=Pseudomonas aeruginosa (strain ATCC 15692 / PAO1 / 1C / PRS 101 / LMG 12228) GN=PA2634 PE=1 SV=1	1	4	4	4	9.8	9.8	9.8	58.886	531	531	0	33.799	6691500	7				125	239;532;736;878	True;True;True;True	256;557;774;918	431;432;938;1307;1308;1565	862;863;1855;2561;2562;2563;3049	862;1855;2561;3049
sp|Q9I1L9|DLDH1_PSEAE	sp|Q9I1L9|DLDH1_PSEAE	3	3	3	>sp|Q9I1L9|DLDH1_PSEAE Dihydrolipoyl dehydrogenase OS=Pseudomonas aeruginosa (strain ATCC 15692 / PAO1 / 1C / PRS 101 / LMG 12228) GN=lpdV PE=1 SV=1	1	3	3	3	9.9	9.9	9.9	48.588	464	464	0	26.31	5358100	2				126	721;768;828	True;True;True	759;806;867	1277;1278;1359;1474	2481;2482;2653;2860	2481;2653;2860
sp|Q9I1M0|ODB2_PSEAE	sp|Q9I1M0|ODB2_PSEAE	2	2	2	>sp|Q9I1M0|ODB2_PSEAE Lipoamide acyltransferase component of branched-chain alpha-keto acid dehydrogenase complex OS=Pseudomonas aeruginosa (strain ATCC 15692 / PAO1 / 1C / PRS 101 / LMG 12228) GN=bkdB PE=1 SV=1	1	2	2	2	9.3	9.3	9.3	45.774	428	428	0	12.809	2951700	3				127	490;902	True;True	514;942	857;1602;1603	1676;3110;3111	1676;3110
sp|Q9I2A8|ATOB_PSEAE	sp|Q9I2A8|ATOB_PSEAE	10	10	10	>sp|Q9I2A8|ATOB_PSEAE Acetyl-CoA acetyltransferase OS=Pseudomonas aeruginosa (strain ATCC 15692 / PAO1 / 1C / PRS 101 / LMG 12228) GN=atoB PE=3 SV=1	1	10	10	10	46.1	46.1	46.1	40.405	393	393	0	65.501	18499000	11				128	47;74;223;288;374;457;523;565;591;735	True;True;True;True;True;True;True;True;True;True	49;79;239;306;395;481;547;590;620;773	81;82;138;407;509;664;803;924;990;1034;1306	178;179;320;828;1012;1307;1575;1824;1942;2030;2031;2560	178;320;828;1012;1307;1575;1824;1942;2031;2560
sp|Q9I2U0|CLPX_PSEAE	sp|Q9I2U0|CLPX_PSEAE	1	1	1	>sp|Q9I2U0|CLPX_PSEAE ATP-dependent Clp protease ATP-binding subunit ClpX OS=Pseudomonas aeruginosa (strain ATCC 15692 / PAO1 / 1C / PRS 101 / LMG 12228) GN=clpX PE=3 SV=1	1	1	1	1	5.4	5.4	5.4	46.991	426	426	0.0042194	5.6876	250330	2				129	549	TRUE	574	964	1892;1893	1892
sp|Q9I2U2|TIG_PSEAE	sp|Q9I2U2|TIG_PSEAE	7	7	7	>sp|Q9I2U2|TIG_PSEAE Trigger factor OS=Pseudomonas aeruginosa (strain ATCC 15692 / PAO1 / 1C / PRS 101 / LMG 12228) GN=tig PE=3 SV=1	1	7	7	7	26.1	26.1	26.1	48.581	436	436	0	43.33	6970300	5				130	9;537;542;581;727;847;867	True;True;True;True;True;True;True	9;562;567;608;765;886;906	13;946;952;1017;1289;1511;1545	17;1867;1876;1998;2501;2911;2988	17;1867;1876;1998;2501;2911;2988
sp|Q9I2V5|ACNB_PSEAE	sp|Q9I2V5|ACNB_PSEAE	15	15	15	>sp|Q9I2V5|ACNB_PSEAE Aconitate hydratase B OS=Pseudomonas aeruginosa (strain ATCC 15692 / PAO1 / 1C / PRS 101 / LMG 12228) GN=acnB PE=3 SV=1	1	15	15	15	26.8	26.8	26.8	93.627	869	869	0	109.73	50789000	43				131	0;7;29;45;161;179;434;497;545;587;594;726;762;862;870	True;True;True;True;True;True;True;True;True;True;True;True;True;True;True	0;7;31;47;172;192;458;521;570;615;623;764;800;901;909	0;8;9;10;11;54;55;79;301;302;332;769;868;869;870;871;957;958;1025;1026;1037;1038;1287;1288;1348;1349;1538;1549;1550	0;10;11;12;13;14;15;129;130;176;637;638;639;701;1520;1695;1696;1697;1698;1699;1700;1701;1702;1703;1882;1883;1884;1885;2011;2012;2035;2036;2037;2498;2499;2500;2640;2641;2978;2998;2999;3000;3001	0;10;129;176;637;701;1520;1696;1882;2011;2035;2499;2640;2978;3001
sp|Q9I2W7|RRAAH_PSEAE	sp|Q9I2W7|RRAAH_PSEAE	3	3	3	>sp|Q9I2W7|RRAAH_PSEAE Putative 4-hydroxy-4-methyl-2-oxoglutarate aldolase OS=Pseudomonas aeruginosa (strain ATCC 15692 / PAO1 / 1C / PRS 101 / LMG 12228) GN=PA1772 PE=1 SV=1	1	3	3	3	25.9	25.9	25.9	17.404	162	162	0	20.503	20328000	7				132	76;192;196	True;True;True	81;207;211	140;141;357;358;364	322;323;324;325;742;743;744;753	325;742;753
sp|Q9I3C5|HTPG_PSEAE	sp|Q9I3C5|HTPG_PSEAE	9	9	9	>sp|Q9I3C5|HTPG_PSEAE Chaperone protein HtpG OS=Pseudomonas aeruginosa (strain ATCC 15692 / PAO1 / 1C / PRS 101 / LMG 12228) GN=htpG PE=3 SV=1	1	9	9	9	20.2	20.2	20.2	71.667	634	634	0	63.518	20446000	15				133	255;268;354;453;491;560;840;859;922	True;True;True;True;True;True;True;True;True	273;286;374;477;515;585;879;898;962	456;476;477;626;799;858;982;1500;1501;1533;1640	919;953;954;955;1242;1567;1568;1677;1930;2892;2893;2894;2895;2971;3203	919;954;1242;1568;1677;1930;2892;2971;3203
sp|Q9I3D1|DLDH2_PSEAE	sp|Q9I3D1|DLDH2_PSEAE	10	10	10	>sp|Q9I3D1|DLDH2_PSEAE Dihydrolipoyl dehydrogenase OS=Pseudomonas aeruginosa (strain ATCC 15692 / PAO1 / 1C / PRS 101 / LMG 12228) GN=lpdG PE=3 SV=1	1	10	10	10	30.1	30.1	30.1	50.164	478	478	0	95.149	79353000	33				134	26;87;112;120;282;353;496;616;670;770	True;True;True;True;True;True;True;True;True;True	28;92;119;127;128;300;373;520;649;706;808	50;51;159;160;209;210;224;225;226;501;502;624;625;866;867;1094;1095;1184;1362;1363	124;125;126;362;363;364;365;473;474;475;476;477;494;495;496;497;498;499;500;1001;1002;1003;1240;1241;1693;1694;2158;2159;2160;2161;2307;2661;2662	124;362;473;496;1002;1241;1693;2158;2307;2661	28	336
sp|Q9I3D2|ODO2_PSEAE	sp|Q9I3D2|ODO2_PSEAE	7	7	7	>sp|Q9I3D2|ODO2_PSEAE Dihydrolipoyllysine-residue succinyltransferase component of 2-oxoglutarate dehydrogenase complex OS=Pseudomonas aeruginosa (strain ATCC 15692 / PAO1 / 1C / PRS 101 / LMG 12228) GN=sucB PE=3 SV=1	1	7	7	7	24.9	24.9	24.9	42.887	409	409	0	44.157	16359000	13				135	103;172;220;459;566;601;876	True;True;True;True;True;True;True	110;184;236;483;591;634;916	193;194;320;402;403;806;991;1061;1563	451;452;453;454;455;671;817;818;819;1580;1943;2081;3046;3047	452;671;819;1580;1943;2081;3046
sp|Q9I3E3|Y1574_PSEAE	sp|Q9I3E3|Y1574_PSEAE	1	1	1	>sp|Q9I3E3|Y1574_PSEAE UPF0345 protein PA1574 OS=Pseudomonas aeruginosa (strain ATCC 15692 / PAO1 / 1C / PRS 101 / LMG 12228) GN=PA1574 PE=3 SV=1	1	1	1	1	10.8	10.8	10.8	10.156	93	93	0.0042918	5.7257	2531700	2				136	853	TRUE	892	1519;1520	2925;2926	2925
sp|Q9I3F5|ACNA_PSEAE	sp|Q9I3F5|ACNA_PSEAE	14	14	14	>sp|Q9I3F5|ACNA_PSEAE Aconitate hydratase A OS=Pseudomonas aeruginosa (strain ATCC 15692 / PAO1 / 1C / PRS 101 / LMG 12228) GN=acnA PE=3 SV=1	1	14	14	14	26	26	26	99.147	910	910	0	96.969	31814000	25				137	59;229;260;293;382;427;428;526;758;783;838;845;893;921	True;True;True;True;True;True;True;True;True;True;True;True;True;True	64;245;278;311;404;451;452;550;796;821;877;884;933;961	113;417;462;515;516;680;757;758;759;928;1343;1380;1381;1497;1509;1590;1638;1639	278;842;843;925;1019;1020;1021;1330;1484;1485;1486;1487;1828;2635;2684;2685;2686;2687;2688;2689;2888;2908;3094;3095;3201;3202	278;842;925;1020;1330;1484;1486;1828;2635;2686;2888;2908;3095;3202
sp|Q9I4S5|PDXH_PSEAE	sp|Q9I4S5|PDXH_PSEAE	1	1	1	>sp|Q9I4S5|PDXH_PSEAE Pyridoxine/pyridoxamine 5-phosphate oxidase OS=Pseudomonas aeruginosa (strain ATCC 15692 / PAO1 / 1C / PRS 101 / LMG 12228) GN=pdxH PE=3 SV=1	1	1	1	1	7.9	7.9	7.9	24.86	215	215	0	8.578	3473700	3				138	162	TRUE	173	303;304	640;641;642	640
sp|Q9I4W3|DAPA_PSEAE	sp|Q9I4W3|DAPA_PSEAE	1	1	1	>sp|Q9I4W3|DAPA_PSEAE 4-hydroxy-tetrahydrodipicolinate synthase OS=Pseudomonas aeruginosa (strain ATCC 15692 / PAO1 / 1C / PRS 101 / LMG 12228) GN=dapA PE=1 SV=1	1	1	1	1	4.5	4.5	4.5	31.449	292	292	0	8.3632	1042800	1				139	435	TRUE	459	770	1521	1521
sp|Q9I4Z4|PAL_PSEAE	sp|Q9I4Z4|PAL_PSEAE	2	2	2	>sp|Q9I4Z4|PAL_PSEAE Peptidoglycan-associated lipoprotein OS=Pseudomonas aeruginosa (strain ATCC 15692 / PAO1 / 1C / PRS 101 / LMG 12228) GN=pal PE=3 SV=1	1	2	2	2	21.4	21.4	21.4	17.925	168	168	0	20.266	5980500	6				140	252;918	True;True	270;958	452;1633;1634	907;908;3194;3195;3196;3197	908;3194
sp|Q9I576|HPPD_PSEAE	sp|Q9I576|HPPD_PSEAE	6	6	6	>sp|Q9I576|HPPD_PSEAE 4-hydroxyphenylpyruvate dioxygenase OS=Pseudomonas aeruginosa (strain ATCC 15692 / PAO1 / 1C / PRS 101 / LMG 12228) GN=hpd PE=3 SV=1	1	6	6	6	22.7	22.7	22.7	39.912	357	357	0	69.61	20640000	15				141	70;71;388;432;608;782	True;True;True;True;True;True	75;76;410;456;641;820	131;132;133;134;688;766;767;1077;1078;1079;1378;1379	311;312;313;314;1347;1348;1516;1517;1518;2133;2134;2135;2136;2137;2138;2682;2683	311;313;1348;1516;2133;2682
sp|Q9I589|CBPD_PSEAE	sp|Q9I589|CBPD_PSEAE	1	1	1	>sp|Q9I589|CBPD_PSEAE Chitin-binding protein CbpD OS=Pseudomonas aeruginosa (strain ATCC 15692 / PAO1 / 1C / PRS 101 / LMG 12228) GN=cbpD PE=1 SV=1	1	1	1	1	3.6	3.6	3.6	41.916	389	389	0	8.9628	4227200	2				142	114	TRUE	121	212;213	479;480	480
sp|Q9I5V8|RS21_PSEAE	sp|Q9I5V8|RS21_PSEAE	3	3	3	>sp|Q9I5V8|RS21_PSEAE 30S ribosomal protein S21 OS=Pseudomonas aeruginosa (strain ATCC 15692 / PAO1 / 1C / PRS 101 / LMG 12228) GN=rpsU PE=1 SV=3	1	3	3	3	28.2	28.2	28.2	8.4848	71	71	0	18.683	7490900	5				143	52;245;833	True;True;True	55;263;872	95;442;443;1489	224;892;893;894;2876	224;893;2876
sp|Q9I5Y1|ALF_PSEAE	sp|Q9I5Y1|ALF_PSEAE	5	5	5	>sp|Q9I5Y1|ALF_PSEAE Fructose-bisphosphate aldolase OS=Pseudomonas aeruginosa (strain ATCC 15692 / PAO1 / 1C / PRS 101 / LMG 12228) GN=fba PE=3 SV=1	1	5	5	5	16.9	16.9	16.9	38.573	354	354	0	28.715	4422700	3				144	277;291;413;759;904	True;True;True;True;True	295;309;437;797;944	490;513;733;1344;1610	975;1017;1442;2636;3150	975;1017;1442;2636;3150
sp|Q9I5Y4|PGK_PSEAE	sp|Q9I5Y4|PGK_PSEAE	1	1	1	>sp|Q9I5Y4|PGK_PSEAE Phosphoglycerate kinase OS=Pseudomonas aeruginosa (strain ATCC 15692 / PAO1 / 1C / PRS 101 / LMG 12228) GN=pgk PE=3 SV=1	1	1	1	1	4.4	4.4	4.4	40.404	387	387	0	5.8091	774520	1				145	780	TRUE	818	1375	2679	2679
sp|Q9I5Z0|METK_PSEAE	sp|Q9I5Z0|METK_PSEAE	4	4	4	>sp|Q9I5Z0|METK_PSEAE S-adenosylmethionine synthase OS=Pseudomonas aeruginosa (strain ATCC 15692 / PAO1 / 1C / PRS 101 / LMG 12228) GN=metK PE=3 SV=1	1	4	4	4	15.2	15.2	15.2	42.709	396	396	0	31.98	7569200	9				146	368;410;613;745	True;True;True;True	389;434;646;783	653;654;655;729;1088;1089;1323	1294;1295;1296;1297;1438;2151;2152;2153;2602	1294;1438;2153;2602
sp|Q9I617|BIOF_PSEAE	sp|Q9I617|BIOF_PSEAE	1	1	1	>sp|Q9I617|BIOF_PSEAE 8-amino-7-oxononanoate synthase OS=Pseudomonas aeruginosa (strain ATCC 15692 / PAO1 / 1C / PRS 101 / LMG 12228) GN=bioF PE=3 SV=1	1	1	1	1	5	5	5	42.237	401	401	0	7.3994	1933200	0				147	118	TRUE	125	221;222	491;492	492
sp|Q9I636|MASZ_PSEAE	sp|Q9I636|MASZ_PSEAE	2	2	2	>sp|Q9I636|MASZ_PSEAE Malate synthase G OS=Pseudomonas aeruginosa (strain ATCC 15692 / PAO1 / 1C / PRS 101 / LMG 12228) GN=glcB PE=3 SV=1	1	2	2	2	4.1	4.1	4.1	78.659	725	725	0	11.535	2406400	2				148	604;798	True;True	637;836	1065;1422	2086;2766	2086;2766
sp|Q9I685|SAHH_PSEAE	sp|Q9I685|SAHH_PSEAE	9	9	9	>sp|Q9I685|SAHH_PSEAE Adenosylhomocysteinase OS=Pseudomonas aeruginosa (strain ATCC 15692 / PAO1 / 1C / PRS 101 / LMG 12228) GN=ahcY PE=3 SV=1	1	9	9	9	24.7	24.7	24.7	51.399	469	469	0	56.991	28989000	16				149	310;402;423;461;569;676;781;858;898	True;True;True;True;True;True;True;True;True	328;425;447;485;594;712;819;897;938	540;541;713;749;750;809;996;997;1196;1197;1376;1377;1531;1532;1596;1597	1057;1058;1395;1474;1475;1585;1957;1958;2324;2325;2680;2681;2967;2968;2969;2970;3102;3103	1057;1395;1474;1585;1957;2325;2681;2969;3102
sp|Q9I6G2|Y329_PSEAE	sp|Q9I6G2|Y329_PSEAE	1	1	1	>sp|Q9I6G2|Y329_PSEAE UPF0339 protein PA0329 OS=Pseudomonas aeruginosa (strain ATCC 15692 / PAO1 / 1C / PRS 101 / LMG 12228) GN=PA0329 PE=3 SV=1	1	1	1	1	10	10	10	11.773	110	110	0	5.8231	966420	1				150	190	TRUE	205	355	740	740
sp|Q9I6M4|DAVT_PSEAE	sp|Q9I6M4|DAVT_PSEAE	7	7	7	>sp|Q9I6M4|DAVT_PSEAE 5-aminovalerate aminotransferase DavT OS=Pseudomonas aeruginosa (strain ATCC 15692 / PAO1 / 1C / PRS 101 / LMG 12228) GN=davT PE=1 SV=1	1	7	7	7	21.6	21.6	21.6	45.22	426	426	0	49.77	22884000	10				151	31;51;281;348;724;753;825	True;True;True;True;True;True;True	33;54;299;368;762;791;864	57;94;499;500;615;616;1283;1284;1335;1468;1469	132;223;999;1000;1223;1224;2490;2491;2492;2624;2848;2849	132;223;1000;1223;2490;2624;2849
sp|Q9I6M5|DAVD_PSEAE	sp|Q9I6M5|DAVD_PSEAE	4	4	4	>sp|Q9I6M5|DAVD_PSEAE Glutarate-semialdehyde dehydrogenase DavD OS=Pseudomonas aeruginosa (strain ATCC 15692 / PAO1 / 1C / PRS 101 / LMG 12228) GN=davD PE=1 SV=1	1	4	4	4	14.7	14.7	14.7	51.622	483	483	0	32.438	8829300	5				152	536;799;854;887	True;True;True;True	561;837;893;927	945;1423;1521;1522;1577	1866;2767;2927;2928;3072	1866;2767;2927;3072
sp|Q9I747|HCP1_PSEAE	sp|Q9I747|HCP1_PSEAE	3	3	3	>sp|Q9I747|HCP1_PSEAE Protein hcp1 OS=Pseudomonas aeruginosa (strain ATCC 15692 / PAO1 / 1C / PRS 101 / LMG 12228) GN=hcp1 PE=1 SV=1	1	3	3	3	25.9	25.9	25.9	17.414	162	162	0	27.723	14109000	6				153	46;258;857	True;True;True	48;276;896	80;459;460;1529;1530	177;922;923;2964;2965;2966	177;923;2965
sp|Q9S508|PHZB2_PSEAE	sp|Q9S508|PHZB2_PSEAE	5	5	2	>sp|Q9S508|PHZB2_PSEAE Phenazine biosynthesis protein PhzB 2 OS=Pseudomonas aeruginosa (strain ATCC 15692 / PAO1 / 1C / PRS 101 / LMG 12228) GN=phzB2 PE=1 SV=1	1	5	5	2	44.4	44.4	25.9	19.027	162	162	0	40.686	65182000	24				154	82;227;417;471;586	True;True;True;True;True	87;243;441;495;613;614	152;153;413;414;739;740;829;1022;1023;1024	350;351;352;353;354;355;835;836;837;838;839;1450;1451;1452;1453;1629;2003;2004;2005;2006;2007;2008;2009;2010	354;838;1450;1629;2007	29	1
sp|Q9X2T1|THIO_PSEAE	sp|Q9X2T1|THIO_PSEAE	3	3	3	>sp|Q9X2T1|THIO_PSEAE Thioredoxin OS=Pseudomonas aeruginosa (strain ATCC 15692 / PAO1 / 1C / PRS 101 / LMG 12228) GN=trxA PE=3 SV=1	1	3	3	3	38	38	38	11.87	108	108	0	21.143	9496900	6				155	535;582;682	True;True;True	560;609;719	943;944;1018;1208	1861;1862;1863;1864;1865;1999;2346	1861;1999;2346	30	38
tr|G3XCV5|G3XCV5_PSEAE	tr|G3XCV5|G3XCV5_PSEAE	1	1	1	>tr|G3XCV5|G3XCV5_PSEAE Poly(3-hydroxyalkanoic acid) synthase 1 OS=Pseudomonas aeruginosa (strain ATCC 15692 / PAO1 / 1C / PRS 101 / LMG 12228) GN=phaC1 PE=4 SV=1	1	1	1	1	2.5	2.5	2.5	62.522	559	559	0	6.0442	1113600	1				156	540	TRUE	565	949	1871	1871
tr|G3XCZ9|G3XCZ9_PSEAE	tr|G3XCZ9|G3XCZ9_PSEAE	1	1	1	>tr|G3XCZ9|G3XCZ9_PSEAE Poly(3-hydroxyalkanoic acid) synthase 2 OS=Pseudomonas aeruginosa (strain ATCC 15692 / PAO1 / 1C / PRS 101 / LMG 12228) GN=phaC2 PE=4 SV=1	1	1	1	1	2.5	2.5	2.5	62.738	560	560	0	5.934	830450	1				157	539	TRUE	564	948	1870	1870
tr|Q9HT45|Q9HT45_PSEAE	tr|Q9HT45|Q9HT45_PSEAE	1	1	1	>tr|Q9HT45|Q9HT45_PSEAE Uncharacterized protein OS=Pseudomonas aeruginosa (strain ATCC 15692 / PAO1 / 1C / PRS 101 / LMG 12228) GN=PA5528 PE=4 SV=1	1	1	1	1	4.9	4.9	4.9	30.414	284	284	0	6.0319	1743500	0				158	109	TRUE	116	206	470	470
tr|Q9HTD1|Q9HTD1_PSEAE	tr|Q9HTD1|Q9HTD1_PSEAE	29	29	29	>tr|Q9HTD1|Q9HTD1_PSEAE Probable transcarboxylase subunit OS=Pseudomonas aeruginosa (strain ATCC 15692 / PAO1 / 1C / PRS 101 / LMG 12228) GN=PA5435 PE=4 SV=1	1	29	29	29	62.4	62.4	62.4	66.095	607	607	0	323.31	1102000000	372				159	12;19;88;99;100;152;183;214;280;335;338;339;362;363;366;381;392;458;468;579;646;647;678;679;746;792;855;871;912	True;True;True;True;True;True;True;True;True;True;True;True;True;True;True;True;True;True;True;True;True;True;True;True;True;True;True;True;True	12;19;93;94;106;107;163;196;197;230;298;354;357;358;359;382;383;384;387;402;403;414;415;482;492;605;606;682;683;714;715;716;784;830;894;910;911;952	19;20;32;33;34;161;162;163;164;165;166;186;187;188;189;190;284;285;286;338;339;340;341;342;392;393;394;495;496;497;498;585;586;590;591;592;593;594;595;596;597;598;599;600;601;602;603;638;639;640;641;642;643;644;650;674;675;676;677;678;679;695;696;697;698;804;805;824;825;1012;1013;1014;1015;1148;1149;1150;1151;1199;1200;1201;1202;1203;1204;1205;1324;1325;1394;1395;1396;1397;1398;1399;1400;1401;140…	60;61;62;63;64;65;66;67;80;81;82;83;84;85;86;87;88;89;90;91;92;93;94;95;96;97;98;366;367;368;369;370;371;372;373;374;375;376;377;378;379;380;381;382;437;438;439;440;441;442;443;444;445;446;447;448;609;610;611;710;711;712;713;714;715;716;717;718;719;720;721;722;723;724;725;726;798;799;800;801;802;803;804;805;806;807;808;809;988;989;990;991;992;993;994;995;996;997;998;1136;1137;1138;1139;1140;1141;…	64;92;374;438;448;611;718;805;989;1137;1153;1165;1266;1274;1291;1323;1371;1576;1624;1983;2247;2251;2335;2342;2604;2745;2932;3009;3171	31;32;33;34;35;36;37;38;39;40;41	125;169;172;182;239;251;274;306;323;435;511
tr|Q9HTD9|Q9HTD9_PSEAE	tr|Q9HTD9|Q9HTD9_PSEAE	6	6	6	>tr|Q9HTD9|Q9HTD9_PSEAE Alcohol dehydrogenase OS=Pseudomonas aeruginosa (strain ATCC 15692 / PAO1 / 1C / PRS 101 / LMG 12228) GN=adhA PE=1 SV=1	1	6	6	6	22.5	22.5	22.5	35.911	342	342	0	41.758	17123000	11				160	13;20;90;482;650;861	True;True;True;True;True;True	13;20;96;506;686;900	21;35;36;168;847;1155;1156;1536;1537	68;99;100;101;384;1660;2257;2258;2975;2976;2977	68;99;384;1660;2257;2975
tr|Q9HTP2|Q9HTP2_PSEAE	tr|Q9HTP2|Q9HTP2_PSEAE	9	9	9	>tr|Q9HTP2|Q9HTP2_PSEAE Probable aldehyde dehydrogenase OS=Pseudomonas aeruginosa (strain ATCC 15692 / PAO1 / 1C / PRS 101 / LMG 12228) GN=PA5312 PE=3 SV=1	1	9	9	9	30.2	30.2	30.2	53.143	497	497	0	68.903	39574000	26				161	222;283;347;372;373;452;508;712;750	True;True;True;True;True;True;True;True;True	238;301;367;393;394;476;532;750;788	405;406;503;504;613;614;661;662;663;797;798;888;889;1260;1261;1330;1331	821;822;823;824;825;826;827;1004;1005;1006;1007;1221;1222;1304;1305;1306;1564;1565;1566;1754;1755;2438;2439;2440;2619;2620	822;1006;1222;1304;1306;1564;1754;2438;2619
tr|Q9HTU9|Q9HTU9_PSEAE	tr|Q9HTU9|Q9HTU9_PSEAE	1	1	1	>tr|Q9HTU9|Q9HTU9_PSEAE Uncharacterized protein OS=Pseudomonas aeruginosa (strain ATCC 15692 / PAO1 / 1C / PRS 101 / LMG 12228) GN=PA5245 PE=4 SV=1	1	1	1	1	4.5	4.5	4.5	23.425	222	222	0	5.8449	1484500	2				162	841	TRUE	880	1502	2896;2897	2897
tr|Q9HU11|Q9HU11_PSEAE	tr|Q9HU11|Q9HU11_PSEAE	6	6	6	>tr|Q9HU11|Q9HU11_PSEAE Uncharacterized protein OS=Pseudomonas aeruginosa (strain ATCC 15692 / PAO1 / 1C / PRS 101 / LMG 12228) GN=PA5178 PE=4 SV=1	1	6	6	6	58.6	58.6	58.6	15.46	145	145	0	52.807	35346000	22				163	34;420;444;570;819;826	True;True;True;True;True;True	36;444;468;595;858;865	62;63;744;745;784;785;998;999;1458;1459;1470;1471	140;141;142;143;1457;1458;1546;1547;1548;1549;1959;1960;2835;2836;2837;2850;2851;2852;2853;2854;2855;2856	140;1458;1549;1960;2835;2850
tr|Q9HU38|Q9HU38_PSEAE	tr|Q9HU38|Q9HU38_PSEAE	2	2	2	>tr|Q9HU38|Q9HU38_PSEAE Uncharacterized protein OS=Pseudomonas aeruginosa (strain ATCC 15692 / PAO1 / 1C / PRS 101 / LMG 12228) GN=PA5146 PE=4 SV=1	1	2	2	2	4	4	4	80.849	750	750	0	12.702	800610	3				164	300;553	True;True	318;578	525;970;971	1031;1901;1902	1031;1901
tr|Q9HUC3|Q9HUC3_PSEAE	tr|Q9HUC3|Q9HUC3_PSEAE	1	1	1	>tr|Q9HUC3|Q9HUC3_PSEAE Polyhydroxyalkanoate synthesis protein PhaF OS=Pseudomonas aeruginosa (strain ATCC 15692 / PAO1 / 1C / PRS 101 / LMG 12228) GN=phaF PE=4 SV=1	1	1	1	1	3.6	3.6	3.6	30.577	309	309	0	5.793	2109500	2				165	897	TRUE	937	1595	3100;3101	3100
tr|Q9HUD3|Q9HUD3_PSEAE	tr|Q9HUD3|Q9HUD3_PSEAE	7	7	7	>tr|Q9HUD3|Q9HUD3_PSEAE Malic enzyme OS=Pseudomonas aeruginosa (strain ATCC 15692 / PAO1 / 1C / PRS 101 / LMG 12228) GN=PA5046 PE=4 SV=1	1	7	7	7	25.1	25.1	25.1	45.428	422	422	0	43.156	6491900	9				166	4;178;514;677;729;747;805	True;True;True;True;True;True;True	4;191;538;713;767;785;843	5;331;910;1198;1292;1326;1433	6;7;699;700;1808;2326;2509;2615;2779	6;699;1808;2326;2509;2615;2779
tr|Q9HV54|Q9HV54_PSEAE	tr|Q9HV54|Q9HV54_PSEAE	2	2	2	>tr|Q9HV54|Q9HV54_PSEAE Transcription termination/antitermination protein NusA OS=Pseudomonas aeruginosa (strain ATCC 15692 / PAO1 / 1C / PRS 101 / LMG 12228) GN=nusA PE=3 SV=1	1	2	2	2	7.7	7.7	7.7	54.658	493	493	0	14.687	1251700	4				167	349;389	True;True	369;411	617;689;690	1225;1349;1350;1351	1225;1350
tr|Q9HV96|Q9HV96_PSEAE	tr|Q9HV96|Q9HV96_PSEAE	2	2	2	>tr|Q9HV96|Q9HV96_PSEAE Uncharacterized protein OS=Pseudomonas aeruginosa (strain ATCC 15692 / PAO1 / 1C / PRS 101 / LMG 12228) GN=PA4701 PE=4 SV=1	1	2	2	2	4.8	4.8	4.8	58.376	520	520	0	11.514	1918400	2				168	247;396	True;True	265;419	446;447;704	901;902;1382	902;1382
tr|Q9HVD5|Q9HVD5_PSEAE	tr|Q9HVD5|Q9HVD5_PSEAE	1	1	1	>tr|Q9HVD5|Q9HVD5_PSEAE Uncharacterized protein OS=Pseudomonas aeruginosa (strain ATCC 15692 / PAO1 / 1C / PRS 101 / LMG 12228) GN=PA4657 PE=4 SV=1	1	1	1	1	4	4	4	35.913	327	327	0	6.7947	149640	1				169	163	TRUE	174	305	643	643
tr|Q9HVF9|Q9HVF9_PSEAE	tr|Q9HVF9|Q9HVF9_PSEAE	4	4	4	>tr|Q9HVF9|Q9HVF9_PSEAE Uncharacterized protein OS=Pseudomonas aeruginosa (strain ATCC 15692 / PAO1 / 1C / PRS 101 / LMG 12228) GN=PA4632 PE=3 SV=1	1	4	4	4	22.7	22.7	22.7	29.159	273	273	0	26.244	10710000	8				170	123;404;559;674	True;True;True;True	131;427;584;710	230;231;715;980;981;1193;1194	505;506;1397;1927;1928;1929;2321;2322	506;1397;1927;2321
tr|Q9HVJ1|Q9HVJ1_PSEAE	tr|Q9HVJ1|Q9HVJ1_PSEAE	7	7	7	>tr|Q9HVJ1|Q9HVJ1_PSEAE Probable ATP-binding component of ABC transporter OS=Pseudomonas aeruginosa (strain ATCC 15692 / PAO1 / 1C / PRS 101 / LMG 12228) GN=PA4595 PE=4 SV=1	1	7	7	7	17.3	17.3	17.3	61.32	554	554	0	48.5	18026000	10				171	68;269;298;400;486;686;843	True;True;True;True;True;True;True	73;287;316;423;510;723;882	127;128;478;479;522;523;711;852;1213;1505;1506	300;301;956;957;1028;1029;1393;1666;2353;2903;2904	301;956;1029;1393;1666;2353;2904
tr|Q9HVQ3|Q9HVQ3_PSEAE	tr|Q9HVQ3|Q9HVQ3_PSEAE	1	1	1	>tr|Q9HVQ3|Q9HVQ3_PSEAE Ornithine decarboxylase OS=Pseudomonas aeruginosa (strain ATCC 15692 / PAO1 / 1C / PRS 101 / LMG 12228) GN=speC PE=3 SV=1	1	1	1	1	4.7	4.7	4.7	43.559	387	387	0	6.5056	214030	1				172	699	TRUE	736	1231	2377	2377
tr|Q9HVS8|Q9HVS8_PSEAE	tr|Q9HVS8|Q9HVS8_PSEAE	1	1	1	>tr|Q9HVS8|Q9HVS8_PSEAE RoxR OS=Pseudomonas aeruginosa (strain ATCC 15692 / PAO1 / 1C / PRS 101 / LMG 12228) GN=roxR PE=4 SV=1	1	1	1	1	7.5	7.5	7.5	20.616	186	186	0	6.0253	404420	1				173	835	TRUE	874	1491	2878	2878
tr|Q9HVV5|Q9HVV5_PSEAE	tr|Q9HVV5|Q9HVV5_PSEAE	2	2	2	>tr|Q9HVV5|Q9HVV5_PSEAE Uncharacterized protein OS=Pseudomonas aeruginosa (strain ATCC 15692 / PAO1 / 1C / PRS 101 / LMG 12228) GN=PA4463 PE=4 SV=1	1	2	2	2	28.4	28.4	28.4	11.739	102	102	0	12.042	1672100	1				174	442;593	True;True	466;622	780;1036	1533;2034	1533;2034
tr|Q9HVY4|Q9HVY4_PSEAE	tr|Q9HVY4|Q9HVY4_PSEAE	1	1	1	>tr|Q9HVY4|Q9HVY4_PSEAE Ubiquinol-cytochrome c reductase iron-sulfur subunit OS=Pseudomonas aeruginosa (strain ATCC 15692 / PAO1 / 1C / PRS 101 / LMG 12228) GN=PA4431 PE=4 SV=1	1	1	1	1	5.6	5.6	5.6	20.828	197	197	0	7.2708	1361300	2				175	121	TRUE	129	227;228	501;502	502
tr|Q9HW32|Q9HW32_PSEAE	tr|Q9HW32|Q9HW32_PSEAE	4	4	4	>tr|Q9HW32|Q9HW32_PSEAE Insulin-cleaving metalloproteinase outer membrane protein OS=Pseudomonas aeruginosa (strain ATCC 15692 / PAO1 / 1C / PRS 101 / LMG 12228) GN=icmP PE=4 SV=1	1	4	4	4	13.9	13.9	13.9	47.23	446	446	0	26.772	2631700	6				176	142;333;454;763	True;True;True;True	153;352;478;801	268;269;583;800;1350	582;583;584;1134;1569;2642	582;1134;1569;2642
tr|Q9HW49|Q9HW49_PSEAE	tr|Q9HW49|Q9HW49_PSEAE	10	10	10	>tr|Q9HW49|Q9HW49_PSEAE Uncharacterized protein OS=Pseudomonas aeruginosa (strain ATCC 15692 / PAO1 / 1C / PRS 101 / LMG 12228) GN=PA4352 PE=3 SV=1	1	10	10	10	58.4	58.4	58.4	30.972	286	286	0	74.408	50104000	39				177	141;211;421;475;602;648;802;814;816;844	True;True;True;True;True;True;True;True;True;True	151;152;227;445;499;635;684;840;853;855;883	266;267;387;388;746;837;838;1062;1063;1152;1427;1428;1446;1447;1448;1449;1452;1453;1507;1508	580;581;792;793;794;1459;1642;1643;1644;2082;2083;2253;2771;2772;2773;2805;2806;2807;2808;2809;2810;2811;2812;2813;2814;2815;2816;2817;2818;2819;2820;2821;2825;2826;2827;2828;2905;2906;2907	581;793;1459;1642;2083;2253;2771;2806;2825;2907	42	158
tr|Q9HW72|Q9HW72_PSEAE	tr|Q9HW72|Q9HW72_PSEAE	1	1	1	>tr|Q9HW72|Q9HW72_PSEAE Pyruvate kinase OS=Pseudomonas aeruginosa (strain ATCC 15692 / PAO1 / 1C / PRS 101 / LMG 12228) GN=pykA PE=3 SV=1	1	1	1	1	5.6	5.6	5.6	52.252	483	483	0	6.2035	1305300	3				178	446	TRUE	470	788;789	1553;1554;1555	1555
tr|Q9HW86|Q9HW86_PSEAE	tr|Q9HW86|Q9HW86_PSEAE	1	1	1	>tr|Q9HW86|Q9HW86_PSEAE MvaT OS=Pseudomonas aeruginosa (strain ATCC 15692 / PAO1 / 1C / PRS 101 / LMG 12228) GN=mvaT PE=1 SV=1	1	1	1	1	8.9	8.9	8.9	14.18	124	124	0	9.4891	2076300	4				179	199	TRUE	214	367;368	757;758;759;760	757
tr|Q9HWG9|Q9HWG9_PSEAE	tr|Q9HWG9|Q9HWG9_PSEAE	1	1	1	>tr|Q9HWG9|Q9HWG9_PSEAE Flavin-containing monooxygenase OS=Pseudomonas aeruginosa (strain ATCC 15692 / PAO1 / 1C / PRS 101 / LMG 12228) GN=phzS PE=1 SV=1	1	1	1	1	3.7	3.7	3.7	43.644	402	402	0	6.0642	602900	1				180	344	TRUE	364	610	1218	1218
tr|Q9HWK5|Q9HWK5_PSEAE	tr|Q9HWK5|Q9HWK5_PSEAE	3	3	3	>tr|Q9HWK5|Q9HWK5_PSEAE Peptidylprolyl isomerase OS=Pseudomonas aeruginosa (strain ATCC 15692 / PAO1 / 1C / PRS 101 / LMG 12228) GN=ppiC2 PE=4 SV=1	1	3	3	3	50.5	50.5	50.5	9.963	93	93	0	22.734	6305600	4				181	160;224;764	True;True;True	171;240;802	300;408;1351	636;829;830;2643	636;829;2643
tr|Q9HWQ0|Q9HWQ0_PSEAE	tr|Q9HWQ0|Q9HWQ0_PSEAE	1	1	1	>tr|Q9HWQ0|Q9HWQ0_PSEAE Probable iron-sulfur protein OS=Pseudomonas aeruginosa (strain ATCC 15692 / PAO1 / 1C / PRS 101 / LMG 12228) GN=PA4131 PE=4 SV=1	1	1	1	1	2.8	2.8	2.8	63.991	573	573	0	6.0796	1216500	1				182	430	TRUE	454	764	1514	1514
tr|Q9HWV0|Q9HWV0_PSEAE	tr|Q9HWV0|Q9HWV0_PSEAE	1	1	1	>tr|Q9HWV0|Q9HWV0_PSEAE Probable nonribosomal peptide synthetase OS=Pseudomonas aeruginosa (strain ATCC 15692 / PAO1 / 1C / PRS 101 / LMG 12228) GN=PA4078 PE=4 SV=1	1	1	1	1	1.2	1.2	1.2	110.35	991	991	0.0043103	5.7361	662140	1				183	803	TRUE	841	1429	2774	2774
tr|Q9I2C4|Q9I2C4_PSEAE;tr|Q9HX05|Q9HX05_PSEAE	tr|Q9I2C4|Q9I2C4_PSEAE;tr|Q9HX05|Q9HX05_PSEAE	4;4	4;4	4;4	>tr|Q9I2C4|Q9I2C4_PSEAE NAD+ dependent aldehyde dehydrogenase ExaC OS=Pseudomonas aeruginosa (strain ATCC 15692 / PAO1 / 1C / PRS 101 / LMG 12228) GN=exaC PE=3 SV=1;>tr|Q9HX05|Q9HX05_PSEAE Probable aldehyde dehydrogenase OS=Pseudomonas aeruginosa (strain A	2	4	4	4	12.5	12.5	12.5	54.892	506	506;506	0	27.687	4263600	3				184	86;369;487;911	True;True;True;True	91;390;511;951	158;656;853;1620	361;1298;1667;3163	361;1298;1667;3163
tr|Q9HX12|Q9HX12_PSEAE	tr|Q9HX12|Q9HX12_PSEAE	2	2	2	>tr|Q9HX12|Q9HX12_PSEAE Uncharacterized protein OS=Pseudomonas aeruginosa (strain ATCC 15692 / PAO1 / 1C / PRS 101 / LMG 12228) GN=PA4015 PE=4 SV=1	1	2	2	2	15.9	15.9	15.9	16.7	151	151	0	12.138	2756300	3				185	530;573	True;True	554;598	932;933;1003	1833;1834;1965	1833;1965
tr|Q9HXA5|Q9HXA5_PSEAE	tr|Q9HXA5|Q9HXA5_PSEAE	1	1	1	>tr|Q9HXA5|Q9HXA5_PSEAE Uncharacterized protein OS=Pseudomonas aeruginosa (strain ATCC 15692 / PAO1 / 1C / PRS 101 / LMG 12228) GN=PA3908 PE=4 SV=1	1	1	1	1	6.3	6.3	6.3	27.294	239	239	0	5.9447	6724600	3				186	521	TRUE	545	920;921	1819;1820;1821	1819
tr|Q9HXI0|Q9HXI0_PSEAE	tr|Q9HXI0|Q9HXI0_PSEAE	1	1	1	>tr|Q9HXI0|Q9HXI0_PSEAE Uncharacterized protein OS=Pseudomonas aeruginosa (strain ATCC 15692 / PAO1 / 1C / PRS 101 / LMG 12228) GN=PA3822 PE=4 SV=1	1	1	1	1	11.6	11.6	11.6	11.862	112	112	0	5.8965	299580	1				187	304	TRUE	322	532	1040	1040
tr|Q9HXM5|Q9HXM5_PSEAE	tr|Q9HXM5|Q9HXM5_PSEAE	2	2	2	>tr|Q9HXM5|Q9HXM5_PSEAE Inosine-5-monophosphate dehydrogenase OS=Pseudomonas aeruginosa (strain ATCC 15692 / PAO1 / 1C / PRS 101 / LMG 12228) GN=guaB PE=1 SV=1	1	2	2	2	4.5	4.5	4.5	51.707	489	489	0	11.325	781460	3				188	62;909	True;True	67;949	117;1617;1618	282;3160;3161	282;3160
tr|Q9HXR8|Q9HXR8_PSEAE	tr|Q9HXR8|Q9HXR8_PSEAE	3	3	3	>tr|Q9HXR8|Q9HXR8_PSEAE Probable FMN oxidoreductase OS=Pseudomonas aeruginosa (strain ATCC 15692 / PAO1 / 1C / PRS 101 / LMG 12228) GN=PA3723 PE=4 SV=1	1	3	3	3	14.1	14.1	14.1	40.318	368	368	0	17.085	5761300	2				189	213;273;744	True;True;True	229;291;782	391;484;1321;1322	797;962;2600;2601	797;962;2600
tr|Q9HXU8|Q9HXU8_PSEAE	tr|Q9HXU8|Q9HXU8_PSEAE	1	1	1	>tr|Q9HXU8|Q9HXU8_PSEAE Lipotoxon F, LptF OS=Pseudomonas aeruginosa (strain ATCC 15692 / PAO1 / 1C / PRS 101 / LMG 12228) GN=lptF PE=3 SV=1	1	1	1	1	5	5	5	28.514	261	261	0	14.909	1920800	2				190	600	TRUE	633	1059;1060	2079;2080	2079
tr|Q9HY13|Q9HY13_PSEAE	tr|Q9HY13|Q9HY13_PSEAE	2	2	2	>tr|Q9HY13|Q9HY13_PSEAE Uncharacterized protein OS=Pseudomonas aeruginosa (strain ATCC 15692 / PAO1 / 1C / PRS 101 / LMG 12228) GN=PA3613 PE=4 SV=1	1	2	2	2	2.7	2.7	2.7	88.378	801	801	0	12.428	1202400	2				191	147;820	True;True	158;859	276;1460;1461	596;2838;2839	596;2838
tr|Q9HY77|Q9HY77_PSEAE	tr|Q9HY77|Q9HY77_PSEAE	2	2	2	>tr|Q9HY77|Q9HY77_PSEAE Glutaredoxin OS=Pseudomonas aeruginosa (strain ATCC 15692 / PAO1 / 1C / PRS 101 / LMG 12228) GN=PA3533 PE=3 SV=1	1	2	2	2	24.1	24.1	24.1	11.843	108	108	0	20.126	13743000	4				192	249;266	True;True	267;284	449;472;473	904;945;946;947	904;945
tr|Q9HY81|Q9HY81_PSEAE	tr|Q9HY81|Q9HY81_PSEAE	7	7	7	>tr|Q9HY81|Q9HY81_PSEAE Probable peroxidase OS=Pseudomonas aeruginosa (strain ATCC 15692 / PAO1 / 1C / PRS 101 / LMG 12228) GN=PA3529 PE=1 SV=1	1	7	7	7	38	38	38	21.822	200	200	0	53.053	59894000	20				193	149;329;431;618;633;713;923	True;True;True;True;True;True;True	160;347;455;651;668;751;963	279;280;575;765;1098;1099;1127;1262;1263;1641;1642	599;600;601;602;603;604;605;1117;1515;2168;2169;2207;2441;2442;2443;2444;2445;2446;3204;3205	600;1117;1515;2169;2207;2442;3205
tr|Q9HYT5|Q9HYT5_PSEAE	tr|Q9HYT5|Q9HYT5_PSEAE	8	8	8	>tr|Q9HYT5|Q9HYT5_PSEAE Uncharacterized protein OS=Pseudomonas aeruginosa (strain ATCC 15692 / PAO1 / 1C / PRS 101 / LMG 12228) GN=PA3309 PE=3 SV=1	1	8	8	8	62.9	62.9	62.9	16.496	151	151	0	99.883	200960000	70				194	235;364;387;422;531;787;796;830	True;True;True;True;True;True;True;True	252;385;409;446;555;556;825;834;869	426;645;646;647;648;686;687;747;748;934;935;936;937;1387;1417;1418;1419;1477;1478;1479;1480;1481;1482;1483;1484;1485;1486	857;1282;1283;1284;1285;1286;1287;1288;1289;1339;1340;1341;1342;1343;1344;1345;1346;1460;1461;1462;1463;1464;1465;1466;1467;1468;1469;1470;1471;1472;1473;1835;1836;1837;1838;1839;1840;1841;1842;1843;1844;1845;1846;1847;1848;1849;1850;1851;1852;1853;1854;2698;2699;2700;2757;2758;2759;2760;2761;2762;2863;2864;2865;2866;2867;2868;2869;2870;2871;2872	857;1287;1343;1462;1850;2699;2758;2865	43	129
tr|Q9HZG8|Q9HZG8_PSEAE	tr|Q9HZG8|Q9HZG8_PSEAE	1	1	1	>tr|Q9HZG8|Q9HZG8_PSEAE Uncharacterized protein OS=Pseudomonas aeruginosa (strain ATCC 15692 / PAO1 / 1C / PRS 101 / LMG 12228) GN=PA3040 PE=4 SV=1	1	1	1	1	15.6	15.6	15.6	11.916	109	109	0	8.6322	1220000	1				195	525	TRUE	549	927	1827	1827
tr|Q9HZK4|Q9HZK4_PSEAE	tr|Q9HZK4|Q9HZK4_PSEAE	6	6	6	>tr|Q9HZK4|Q9HZK4_PSEAE Glyceraldehyde-3-phosphate dehydrogenase OS=Pseudomonas aeruginosa (strain ATCC 15692 / PAO1 / 1C / PRS 101 / LMG 12228) GN=PA3001 PE=3 SV=1	1	6	6	6	17.6	17.6	17.6	50.111	461	461	0	37.119	7688200	6				196	28;495;623;675;850;863	True;True;True;True;True;True	30;519;657;711;889;902	53;865;1109;1195;1515;1539	128;1692;2183;2323;2915;2979	128;1692;2183;2323;2915;2979
tr|Q9I028|Q9I028_PSEAE	tr|Q9I028|Q9I028_PSEAE	5	5	5	>tr|Q9I028|Q9I028_PSEAE Probable acyl-CoA dehydrogenase OS=Pseudomonas aeruginosa (strain ATCC 15692 / PAO1 / 1C / PRS 101 / LMG 12228) GN=PA2815 PE=4 SV=1	1	5	5	5	10.1	10.1	10.1	88.762	815	815	0	33.83	7061400	8				197	187;198;248;576;914	True;True;True;True;True	201;213;266;602;954	348;349;366;448;1009;1626;1627	733;734;755;756;903;1972;3182;3183;3184	733;756;903;1972;3182
tr|Q9I0D5|Q9I0D5_PSEAE	tr|Q9I0D5|Q9I0D5_PSEAE	1	1	1	>tr|Q9I0D5|Q9I0D5_PSEAE Uncharacterized protein OS=Pseudomonas aeruginosa (strain ATCC 15692 / PAO1 / 1C / PRS 101 / LMG 12228) GN=PA2707 PE=4 SV=1	1	1	1	1	5.3	5.3	5.3	32.205	281	281	0.0041841	5.6768	1807000	1				198	256	TRUE	274	457	920	920
tr|Q9I0H1|Q9I0H1_PSEAE	tr|Q9I0H1|Q9I0H1_PSEAE	1	1	1	>tr|Q9I0H1|Q9I0H1_PSEAE Uncharacterized protein OS=Pseudomonas aeruginosa (strain ATCC 15692 / PAO1 / 1C / PRS 101 / LMG 12228) GN=PA2667 PE=4 SV=1	1	1	1	1	9.4	9.4	9.4	13.379	117	117	0.0043478	5.7698	441460	2				199	104	TRUE	111	195;196	456;457	457
tr|Q9I0L4|Q9I0L4_PSEAE	tr|Q9I0L4|Q9I0L4_PSEAE	5	5	5	>tr|Q9I0L4|Q9I0L4_PSEAE Isocitrate dehydrogenase OS=Pseudomonas aeruginosa (strain ATCC 15692 / PAO1 / 1C / PRS 101 / LMG 12228) GN=idh PE=4 SV=1	1	5	5	5	8.6	8.6	8.6	81.633	741	741	0	33.266	9550200	6				200	140;209;297;419;481	True;True;True;True;True	150;224;315;443;505	264;265;381;382;521;742;743;846	578;579;785;786;1027;1455;1456;1659	578;785;1027;1455;1659
tr|Q9I0L5|Q9I0L5_PSEAE	tr|Q9I0L5|Q9I0L5_PSEAE	10	10	10	>tr|Q9I0L5|Q9I0L5_PSEAE Isocitrate dehydrogenase [NADP] OS=Pseudomonas aeruginosa (strain ATCC 15692 / PAO1 / 1C / PRS 101 / LMG 12228) GN=icd PE=3 SV=1	1	10	10	10	30.4	30.4	30.4	45.577	418	418	0	112.67	70001000	35				201	81;130;158;207;331;376;455;464;627;856	True;True;True;True;True;True;True;True;True;True	86;138;169;222;349;397;479;488;661;662;895	150;151;243;244;245;297;298;378;379;577;578;667;668;801;819;1113;1114;1115;1525;1526;1527;1528	346;347;348;349;523;524;525;526;527;632;633;634;782;783;1120;1121;1122;1123;1124;1311;1312;1570;1618;2189;2190;2191;2954;2955;2956;2957;2958;2959;2960;2961;2962;2963	347;523;632;783;1121;1311;1570;1618;2189;2955	44	47
tr|Q9I0T1|Q9I0T1_PSEAE	tr|Q9I0T1|Q9I0T1_PSEAE	4	4	4	>tr|Q9I0T1|Q9I0T1_PSEAE Probable acyl-CoA thiolase OS=Pseudomonas aeruginosa (strain ATCC 15692 / PAO1 / 1C / PRS 101 / LMG 12228) GN=PA2553 PE=3 SV=1	1	4	4	4	12.6	12.6	12.6	41.4	396	396	0	27.473	7579500	5				202	204;218;761;767	True;True;True;True	219;234;799;805	374;375;400;1346;1347;1358	778;779;815;2638;2639;2652	778;815;2638;2652
tr|Q9I0Z9|Q9I0Z9_PSEAE	tr|Q9I0Z9|Q9I0Z9_PSEAE	2	2	2	>tr|Q9I0Z9|Q9I0Z9_PSEAE Uncharacterized protein OS=Pseudomonas aeruginosa (strain ATCC 15692 / PAO1 / 1C / PRS 101 / LMG 12228) GN=PA2483 PE=4 SV=1	1	2	2	2	10.2	10.2	10.2	36.102	333	333	0	13.262	8801000	5				203	743;771	True;True	781;809	1319;1320;1364	2597;2598;2599;2663;2664	2598;2663
tr|Q9I1E7|Q9I1E7_PSEAE	tr|Q9I1E7|Q9I1E7_PSEAE	4	4	4	>tr|Q9I1E7|Q9I1E7_PSEAE Alkyl hydroperoxide reductase AhpD OS=Pseudomonas aeruginosa (strain ATCC 15692 / PAO1 / 1C / PRS 101 / LMG 12228) GN=PA2331 PE=3 SV=1	1	4	4	4	22.6	22.6	22.6	19.904	186	186	0	26.804	11801000	6				204	303;544;760;905	True;True;True;True	321;569;798;945	530;531;955;956;1345;1611	1038;1039;1880;1881;2637;3151	1038;1880;2637;3151
tr|Q9I1E8|Q9I1E8_PSEAE	tr|Q9I1E8|Q9I1E8_PSEAE	1	1	1	>tr|Q9I1E8|Q9I1E8_PSEAE Uncharacterized protein OS=Pseudomonas aeruginosa (strain ATCC 15692 / PAO1 / 1C / PRS 101 / LMG 12228) GN=PA2330 PE=4 SV=1	1	1	1	1	3.9	3.9	3.9	37.68	355	355	0	6.9346	1964800	1				205	503	TRUE	527	881	1742	1742
tr|Q9I1H5|Q9I1H5_PSEAE	tr|Q9I1H5|Q9I1H5_PSEAE	3	3	3	>tr|Q9I1H5|Q9I1H5_PSEAE Chitinase OS=Pseudomonas aeruginosa (strain ATCC 15692 / PAO1 / 1C / PRS 101 / LMG 12228) GN=chiC PE=3 SV=1	1	3	3	3	9.1	9.1	9.1	53.042	483	483	0	18.507	7510600	6				206	159;377;790	True;True;True	170;398;828	299;669;670;1391;1392	635;1313;1314;2729;2730;2731	635;1314;2729
tr|Q9I1N7|Q9I1N7_PSEAE	tr|Q9I1N7|Q9I1N7_PSEAE	1	1	1	>tr|Q9I1N7|Q9I1N7_PSEAE PslB OS=Pseudomonas aeruginosa (strain ATCC 15692 / PAO1 / 1C / PRS 101 / LMG 12228) GN=pslB PE=3 SV=1	1	1	1	1	2.7	2.7	2.7	53.515	488	488	0	6.1459	218540	1				207	242	TRUE	259	435	866	866
tr|Q9I246|Q9I246_PSEAE	tr|Q9I246|Q9I246_PSEAE	1	1	1	>tr|Q9I246|Q9I246_PSEAE Probable carbamoyl transferase OS=Pseudomonas aeruginosa (strain ATCC 15692 / PAO1 / 1C / PRS 101 / LMG 12228) GN=PA2069 PE=4 SV=1	1	1	1	1	2.3	2.3	2.3	63.382	574	574	0	9.3316	1226700	4				208	637	TRUE	672	1133;1134	2215;2216;2217;2218	2215
tr|Q9I299|Q9I299_PSEAE	tr|Q9I299|Q9I299_PSEAE	13	13	13	>tr|Q9I299|Q9I299_PSEAE Methylcrotonyl-CoA carboxylase, alpha-subunit (Biotin-containing) OS=Pseudomonas aeruginosa (strain ATCC 15692 / PAO1 / 1C / PRS 101 / LMG 12228) GN=liuD PE=1 SV=1	1	13	13	13	33.6	33.6	33.6	71.282	655	655	0	101.68	41127000	20				209	73;77;212;228;308;401;403;418;483;518;551;571;882	True;True;True;True;True;True;True;True;True;True;True;True;True	78;82;228;244;326;424;426;442;507;542;576;596;922	137;142;389;390;415;416;538;712;714;741;848;849;915;916;966;967;1000;1571	319;326;327;795;796;840;841;1055;1394;1396;1454;1661;1662;1663;1813;1814;1895;1896;1961;1962;3059	319;327;795;840;1055;1394;1396;1454;1661;1813;1895;1961;3059
tr|Q9I2A2|Q9I2A2_PSEAE	tr|Q9I2A2|Q9I2A2_PSEAE	1	1	1	>tr|Q9I2A2|Q9I2A2_PSEAE Fumarylacetoacetase OS=Pseudomonas aeruginosa (strain ATCC 15692 / PAO1 / 1C / PRS 101 / LMG 12228) GN=fahA PE=4 SV=1	1	1	1	1	3.7	3.7	3.7	46.341	432	432	0	6.4126	519740	1				210	169	TRUE	180	312	654	654
tr|Q9I2A6|Q9I2A6_PSEAE	tr|Q9I2A6|Q9I2A6_PSEAE	1	1	1	>tr|Q9I2A6|Q9I2A6_PSEAE 3-hydroxybutyrate dehydrogenase OS=Pseudomonas aeruginosa (strain ATCC 15692 / PAO1 / 1C / PRS 101 / LMG 12228) GN=bdhA PE=3 SV=1	1	1	1	1	6.2	6.2	6.2	26.727	256	256	0	6.6732	1340400	1				211	449	TRUE	473	793	1560	1560
tr|Q9I2A9|Q9I2A9_PSEAE	tr|Q9I2A9|Q9I2A9_PSEAE	3	3	3	>tr|Q9I2A9|Q9I2A9_PSEAE DhcB, dehydrocarnitine CoA transferase, subunit B OS=Pseudomonas aeruginosa (strain ATCC 15692 / PAO1 / 1C / PRS 101 / LMG 12228) GN=dhcB PE=4 SV=1	1	3	3	3	22	22	22	23.187	218	218	0	19.451	6207100	7				212	101;328;515	True;True;True	108;346;539	191;573;574;911	449;1112;1113;1114;1115;1116;1809	449;1114;1809
tr|Q9I2B0|Q9I2B0_PSEAE	tr|Q9I2B0|Q9I2B0_PSEAE	1	1	1	>tr|Q9I2B0|Q9I2B0_PSEAE DhcA, dehydrocarnitine CoA transferase, subunit A OS=Pseudomonas aeruginosa (strain ATCC 15692 / PAO1 / 1C / PRS 101 / LMG 12228) GN=dhcA PE=4 SV=1	1	1	1	1	6.9	6.9	6.9	25.243	232	232	0	7.3352	1221800	1				213	365	TRUE	386	649	1290	1290
tr|Q9I2R5|Q9I2R5_PSEAE	tr|Q9I2R5|Q9I2R5_PSEAE	1	1	1	>tr|Q9I2R5|Q9I2R5_PSEAE Uncharacterized protein OS=Pseudomonas aeruginosa (strain ATCC 15692 / PAO1 / 1C / PRS 101 / LMG 12228) GN=PA1830 PE=4 SV=1	1	1	1	1	10.6	10.6	10.6	11.11	104	104	0	8.7282	5516500	1				214	776	TRUE	814	1370	2671	2671
tr|Q9I2U9|Q9I2U9_PSEAE	tr|Q9I2U9|Q9I2U9_PSEAE	2	2	2	>tr|Q9I2U9|Q9I2U9_PSEAE Peptidyl-prolyl cis-trans isomerase OS=Pseudomonas aeruginosa (strain ATCC 15692 / PAO1 / 1C / PRS 101 / LMG 12228) GN=ppiB PE=3 SV=1	1	2	2	2	17.6	17.6	17.6	18.126	165	165	0	12.005	1495300	1				215	102;690	True;True	109;727	192;1219	450;2360	450;2360
tr|Q9I2V3|Q9I2V3_PSEAE	tr|Q9I2V3|Q9I2V3_PSEAE	4	4	4	>tr|Q9I2V3|Q9I2V3_PSEAE Uncharacterized protein OS=Pseudomonas aeruginosa (strain ATCC 15692 / PAO1 / 1C / PRS 101 / LMG 12228) GN=PA1789 PE=1 SV=1	1	4	4	4	20.9	20.9	20.9	31.273	287	287	0	30.435	12516000	6				216	165;221;414;698	True;True;True;True	176;237;438;735	308;404;734;735;1230	648;820;1443;1444;1445;2376	648;820;1443;2376
tr|Q9I2W9|Q9I2W9_PSEAE	tr|Q9I2W9|Q9I2W9_PSEAE	3	3	3	>tr|Q9I2W9|Q9I2W9_PSEAE Phosphoenolpyruvate synthase OS=Pseudomonas aeruginosa (strain ATCC 15692 / PAO1 / 1C / PRS 101 / LMG 12228) GN=ppsA PE=3 SV=1	1	3	3	3	5.7	5.7	5.7	85.816	791	791	0	24.559	2899200	4				217	36;709;752	True;True;True	38;746;790	66;1247;1333;1334	146;2400;2622;2623	146;2400;2623
tr|Q9I2Z1|Q9I2Z1_PSEAE	tr|Q9I2Z1|Q9I2Z1_PSEAE	1	1	1	>tr|Q9I2Z1|Q9I2Z1_PSEAE Uncharacterized protein OS=Pseudomonas aeruginosa (strain ATCC 15692 / PAO1 / 1C / PRS 101 / LMG 12228) GN=PA1746 PE=4 SV=1	1	1	1	1	6.5	6.5	6.5	18.189	168	168	0	6.0518	4616200	1				218	125	TRUE	133	234	511	511
tr|Q9I3B2|Q9I3B2_PSEAE	tr|Q9I3B2|Q9I3B2_PSEAE	2	2	2	>tr|Q9I3B2|Q9I3B2_PSEAE Beta-ketoacyl-ACP synthase I OS=Pseudomonas aeruginosa (strain ATCC 15692 / PAO1 / 1C / PRS 101 / LMG 12228) GN=fabB PE=3 SV=1	1	2	2	2	5.9	5.9	5.9	42.806	405	405	0	15.375	4036000	4				219	193;285	True;True	208;303	359;360;506	745;746;747;1009	745;1009
tr|Q9I3D3|Q9I3D3_PSEAE	tr|Q9I3D3|Q9I3D3_PSEAE	6	6	6	>tr|Q9I3D3|Q9I3D3_PSEAE 2-oxoglutarate dehydrogenase (E1 subunit) OS=Pseudomonas aeruginosa (strain ATCC 15692 / PAO1 / 1C / PRS 101 / LMG 12228) GN=sucA PE=4 SV=1	1	6	6	6	8.8	8.8	8.8	105.88	943	943	0	36.859	10546000	11				220	157;272;448;538;541;717	True;True;True;True;True;True	168;290;472;563;566;755	296;483;792;947;950;951;1269	631;961;1558;1559;1868;1869;1872;1873;1874;1875;2453	631;961;1558;1868;1873;2453
tr|Q9I3D4|Q9I3D4_PSEAE	tr|Q9I3D4|Q9I3D4_PSEAE	4	4	4	>tr|Q9I3D4|Q9I3D4_PSEAE Succinate dehydrogenase (B subunit) OS=Pseudomonas aeruginosa (strain ATCC 15692 / PAO1 / 1C / PRS 101 / LMG 12228) GN=sdhB PE=4 SV=1	1	4	4	4	20.9	20.9	20.9	26.155	235	235	0	29.347	10685000	10				221	203;279;479;568	True;True;True;True	218;297;503;593	373;493;494;843;844;994;995	777;985;986;987;1654;1655;1656;1657;1955;1956	777;987;1655;1955
tr|Q9I3D5|Q9I3D5_PSEAE	tr|Q9I3D5|Q9I3D5_PSEAE	7	7	7	>tr|Q9I3D5|Q9I3D5_PSEAE Succinate dehydrogenase flavoprotein subunit OS=Pseudomonas aeruginosa (strain ATCC 15692 / PAO1 / 1C / PRS 101 / LMG 12228) GN=sdhA PE=3 SV=1	1	7	7	7	17.3	17.3	17.3	63.531	590	590	0	53.656	25183000	19				222	144;257;301;321;384;451;504	True;True;True;True;True;True;True	155;275;319;339;406;475;528	272;458;526;527;558;559;682;683;796;882;883	591;921;1032;1033;1080;1081;1082;1083;1332;1333;1334;1335;1336;1563;1743;1744;1745;1746;1747	591;921;1032;1080;1333;1563;1744
tr|Q9I3Y6|Q9I3Y6_PSEAE	tr|Q9I3Y6|Q9I3Y6_PSEAE	1	1	1	>tr|Q9I3Y6|Q9I3Y6_PSEAE Uncharacterized protein OS=Pseudomonas aeruginosa (strain ATCC 15692 / PAO1 / 1C / PRS 101 / LMG 12228) GN=PA1358 PE=1 SV=1	1	1	1	1	10.6	10.6	10.6	14.701	132	132	0	6.3611	0	1				223	910	TRUE	950	1619	3162	3162
tr|Q9I402|Q9I402_PSEAE;tr|Q9HUA1|Q9HUA1_PSEAE	tr|Q9I402|Q9I402_PSEAE	3;1	3;1	3;1	>tr|Q9I402|Q9I402_PSEAE Probable binding protein component of ABC transporter OS=Pseudomonas aeruginosa (strain ATCC 15692 / PAO1 / 1C / PRS 101 / LMG 12228) GN=PA1342 PE=4 SV=1	2	3	3	3	11.3	11.3	11.3	33.054	302	302;299	0	17.679	1582300	3				224	60;635;919	True;True;True	65;670;959	114;1130;1635	279;2212;3198	279;2212;3198
tr|Q9I4I1|Q9I4I1_PSEAE	tr|Q9I4I1|Q9I4I1_PSEAE	1	1	1	>tr|Q9I4I1|Q9I4I1_PSEAE Ribonucleoside-diphosphate reductase OS=Pseudomonas aeruginosa (strain ATCC 15692 / PAO1 / 1C / PRS 101 / LMG 12228) GN=nrdA PE=3 SV=1	1	1	1	1	1.5	1.5	1.5	107.11	963	963	0	5.917	148660	1				225	886	TRUE	926	1576	3071	3071
tr|Q9I4T3|Q9I4T3_PSEAE	tr|Q9I4T3|Q9I4T3_PSEAE	1	1	1	>tr|Q9I4T3|Q9I4T3_PSEAE Probable outer membrane protein OS=Pseudomonas aeruginosa (strain ATCC 15692 / PAO1 / 1C / PRS 101 / LMG 12228) GN=PA1041 PE=3 SV=1	1	1	1	1	8.6	8.6	8.6	21.747	210	210	0	5.8613	993980	1				226	554	TRUE	579	972	1903	1903
tr|Q9I4X1|Q9I4X1_PSEAE	tr|Q9I4X1|Q9I4X1_PSEAE	1	1	1	>tr|Q9I4X1|Q9I4X1_PSEAE PqsC OS=Pseudomonas aeruginosa (strain ATCC 15692 / PAO1 / 1C / PRS 101 / LMG 12228) GN=pqsC PE=1 SV=1	1	1	1	1	3.4	3.4	3.4	38.238	348	348	0	5.8705	971950	3				227	543	TRUE	568	953;954	1877;1878;1879	1878
tr|Q9I4Z7|Q9I4Z7_PSEAE	tr|Q9I4Z7|Q9I4Z7_PSEAE	2	2	2	>tr|Q9I4Z7|Q9I4Z7_PSEAE Probable dna-binding stress protein OS=Pseudomonas aeruginosa (strain ATCC 15692 / PAO1 / 1C / PRS 101 / LMG 12228) GN=PA0962 PE=3 SV=1	1	2	2	2	15.4	15.4	15.4	17.493	156	156	0	13.457	1228300	2				228	664;873	True;True	700;913	1175;1558	2291;3036	2291;3036
tr|Q9I585|Q9I585_PSEAE	tr|Q9I585|Q9I585_PSEAE	1	1	1	>tr|Q9I585|Q9I585_PSEAE Uncharacterized protein OS=Pseudomonas aeruginosa (strain ATCC 15692 / PAO1 / 1C / PRS 101 / LMG 12228) GN=PA0856 PE=1 SV=1	1	1	1	1	6.6	6.6	6.6	19.998	182	182	0	7.5673	1445100	2				229	556	TRUE	581	974;975	1912;1913	1912
tr|Q9I5E3|Q9I5E3_PSEAE	tr|Q9I5E3|Q9I5E3_PSEAE	2	2	2	>tr|Q9I5E3|Q9I5E3_PSEAE Citrate synthase OS=Pseudomonas aeruginosa (strain ATCC 15692 / PAO1 / 1C / PRS 101 / LMG 12228) GN=prpC PE=3 SV=1	1	2	2	2	8.8	8.8	8.8	41.689	375	375	0	16.478	4676600	4				230	408;742	True;True	431;780	720;721;1318	1403;1404;2595;2596	1403;2595
tr|Q9I5I4|Q9I5I4_PSEAE	tr|Q9I5I4|Q9I5I4_PSEAE	2	2	2	>tr|Q9I5I4|Q9I5I4_PSEAE Probable enoyl-CoA hydratase/isomerase OS=Pseudomonas aeruginosa (strain ATCC 15692 / PAO1 / 1C / PRS 101 / LMG 12228) GN=PA0745 PE=3 SV=1	1	2	2	2	7	7	7	29.904	272	272	0	11.204	1326300	1				231	292;789	True;True	310;827	514;1390	1018;2728	1018;2728
tr|Q9I5R1|Q9I5R1_PSEAE	tr|Q9I5R1|Q9I5R1_PSEAE	2	2	2	>tr|Q9I5R1|Q9I5R1_PSEAE Uncharacterized protein OS=Pseudomonas aeruginosa (strain ATCC 15692 / PAO1 / 1C / PRS 101 / LMG 12228) GN=PA0660 PE=4 SV=1	1	2	2	2	7.5	7.5	7.5	34.814	322	322	0	11.468	1135800	0				232	691;704	True;True	728;741	1220;1239	2361;2391	2361;2391
tr|Q9I5U9|Q9I5U9_PSEAE	tr|Q9I5U9|Q9I5U9_PSEAE	13	13	13	>tr|Q9I5U9|Q9I5U9_PSEAE Uncharacterized protein OS=Pseudomonas aeruginosa (strain ATCC 15692 / PAO1 / 1C / PRS 101 / LMG 12228) GN=PA0588 PE=4 SV=1	1	13	13	13	25.3	25.3	25.3	73.722	640	640	0	122.29	56107000	24				233	95;189;386;517;524;527;534;572;577;610;621;628;739	True;True;True;True;True;True;True;True;True;True;True;True;True	102;203;204;408;541;548;551;559;597;603;643;654;663;777	181;182;352;353;354;685;913;914;925;926;929;941;942;1001;1002;1010;1082;1083;1104;1116;1117;1312;1313	431;432;737;738;739;1338;1811;1812;1825;1826;1829;1859;1860;1963;1964;1973;2143;2144;2145;2175;2192;2193;2567;2568	431;737;1338;1811;1825;1829;1859;1963;1973;2143;2175;2192;2567	45	412
tr|Q9I5Y8|Q9I5Y8_PSEAE	tr|Q9I5Y8|Q9I5Y8_PSEAE	1	1	1	>tr|Q9I5Y8|Q9I5Y8_PSEAE Transketolase OS=Pseudomonas aeruginosa (strain ATCC 15692 / PAO1 / 1C / PRS 101 / LMG 12228) GN=tktA PE=1 SV=1	1	1	1	1	2.6	2.6	2.6	72.219	665	665	0	7.5442	6577400	2				234	264	TRUE	282	468;469	937;938	937
tr|Q9I612|Q9I612_PSEAE	tr|Q9I612|Q9I612_PSEAE	1	1	1	>tr|Q9I612|Q9I612_PSEAE Probable acyl-CoA dehydrogenase OS=Pseudomonas aeruginosa (strain ATCC 15692 / PAO1 / 1C / PRS 101 / LMG 12228) GN=PA0506 PE=3 SV=1	1	1	1	1	2	2	2	65.358	601	601	0.0042017	5.6791	503840	1				235	469	TRUE	493	826	1626	1626
tr|Q9I659|Q9I659_PSEAE	tr|Q9I659|Q9I659_PSEAE	6	6	4	>tr|Q9I659|Q9I659_PSEAE Probable ClpA/B protease ATP binding subunit OS=Pseudomonas aeruginosa (strain ATCC 15692 / PAO1 / 1C / PRS 101 / LMG 12228) GN=PA0459 PE=4 SV=1	1	6	6	4	8.2	8.2	5.5	94.174	850	850	0	41.005	7601500	9				236	309;607;624;654;732;791	True;True;True;True;True;True	327;640;658;690;770;829	539;1076;1110;1160;1301;1302;1393	1056;2132;2184;2185;2262;2552;2553;2554;2732	1056;2132;2184;2262;2553;2732
tr|Q9I662|Q9I662_PSEAE	tr|Q9I662|Q9I662_PSEAE	1	1	1	>tr|Q9I662|Q9I662_PSEAE Probable cold-shock protein OS=Pseudomonas aeruginosa (strain ATCC 15692 / PAO1 / 1C / PRS 101 / LMG 12228) GN=PA0456 PE=4 SV=1	1	1	1	1	26.1	26.1	26.1	7.7066	69	69	0.004386	5.7861	1925000	1				237	356	TRUE	376	629	1245	1245
tr|Q9I671|Q9I671_PSEAE	tr|Q9I671|Q9I671_PSEAE	7	7	7	>tr|Q9I671|Q9I671_PSEAE Glutaryl-CoA dehydrogenase OS=Pseudomonas aeruginosa (strain ATCC 15692 / PAO1 / 1C / PRS 101 / LMG 12228) GN=gcdH PE=3 SV=1	1	7	7	7	27.7	27.7	27.7	43.311	393	393	0	47.557	17667000	15				238	122;185;191;355;596;639;705	True;True;True;True;True;True;True	130;199;206;375;627;674;742	229;344;345;356;627;628;1048;1049;1137;1240;1241	503;504;729;730;741;1243;1244;2059;2060;2061;2062;2221;2392;2393;2394	503;729;741;1243;2059;2221;2392
tr|Q9I6H5|Q9I6H5_PSEAE	tr|Q9I6H5|Q9I6H5_PSEAE	2	2	2	>tr|Q9I6H5|Q9I6H5_PSEAE D-3-phosphoglycerate dehydrogenase OS=Pseudomonas aeruginosa (strain ATCC 15692 / PAO1 / 1C / PRS 101 / LMG 12228) GN=serA PE=3 SV=1	1	2	2	2	6.4	6.4	6.4	44.216	409	409	0	11.611	1766500	7				239	3;720	True;True	3;758	4;1274;1275;1276	5;2475;2476;2477;2478;2479;2480	5;2476
tr|Q9I6Z3|Q9I6Z3_PSEAE	tr|Q9I6Z3|Q9I6Z3_PSEAE	8	8	8	>tr|Q9I6Z3|Q9I6Z3_PSEAE Alkyl hydroperoxide reductase subunit C OS=Pseudomonas aeruginosa (strain ATCC 15692 / PAO1 / 1C / PRS 101 / LMG 12228) GN=ahpC PE=4 SV=1	1	8	8	8	60.4	60.4	60.4	20.541	187	187	0	61.621	115660000	34				240	40;108;274;337;700;748;778;888	True;True;True;True;True;True;True;True	42;115;292;356;737;786;816;928	72;202;203;204;205;485;486;588;589;1232;1233;1327;1328;1372;1373;1578;1579	159;466;467;468;469;963;964;965;966;967;968;969;1146;1147;1148;1149;1150;2378;2379;2380;2381;2382;2616;2617;2673;2674;2675;2676;3073;3074;3075;3076;3077;3078	159;466;964;1146;2381;2616;2673;3076
tr|Q9I762|Q9I762_PSEAE	tr|Q9I762|Q9I762_PSEAE	3	3	3	>tr|Q9I762|Q9I762_PSEAE Uncharacterized protein OS=Pseudomonas aeruginosa (strain ATCC 15692 / PAO1 / 1C / PRS 101 / LMG 12228) GN=PA0070 PE=4 SV=1	1	3	3	3	10.9	10.9	10.9	31.716	304	304	0	17.535	3902600	4				241	43;177;398	True;True;True	45;190;421	76;330;706;707	165;698;1385;1386	165;698;1385

## Sheet: 2-2 Sheet1
Protein IDs-C4HSL (full)
REV__tr|Q9HZS7|Q9HZS7_PSEAE
sp|O52759|RS4_PSEAE
sp|O52760|RPOA_PSEAE
sp|O52762|CATA_PSEAE
sp|O54439|ACP1_PSEAE
sp|O68822|AMPA_PSEAE
sp|O69753|PHZB1_PSEAE
sp|O69754|PHZF_PSEAE
sp|O82850|RS2_PSEAE
sp|O82851|EFTS_PSEAE
sp|P04739|FMPO_PSEAE
sp|P05384|DBHB_PSEAE
sp|P08308|OTCC_PSEAE
sp|P09591|EFTU_PSEAE
sp|P11221|OPRI_PSEAE
sp|P13794|PORF_PSEAE
sp|P13981|ARCA_PSEAE
sp|P13982|ARCC_PSEAE
sp|P14165|CISY_PSEAE
sp|P28810|MMSA_PSEAE
sp|P30718|CH60_PSEAE
sp|P31961|EDD_PSEAE
sp|P37798|ACCC_PSEAE
sp|P37799|BCCP_PSEAE
sp|P43336|PHHC_PSEAE
sp|P47204|FTSZ_PSEAE
sp|P53593|SUCC_PSEAE
sp|P53641|SODF_PSEAE
sp|P72173|AAT_PSEAE
sp|Q51344|DHAS_PSEAE
sp|Q51561|RPOB_PSEAE
sp|Q51567|SUCD_PSEAE
sp|Q59636|NDK_PSEAE
sp|Q59637|ODP1_PSEAE
sp|Q59638|ODP2_PSEAE
sp|Q9HT16|ATPF_PSEAE
sp|Q9HT18|ATPA_PSEAE
sp|Q9HT20|ATPB_PSEAE
sp|Q9HT21|ATPE_PSEAE
sp|Q9HT95|ATSE4_PSEAE
sp|Q9HTD7|ASPA_PSEAE
sp|Q9HTN8|RL28_PSEAE
sp|Q9HU65|GLNA_PSEAE
sp|Q9HUC8|SYR_PSEAE
sp|Q9HUM6|PURA_PSEAE
sp|Q9HUM9|RS6_PSEAE
sp|Q9HV43|DNAK_PSEAE
sp|Q9HV55|IF2_PSEAE
sp|Q9HV59|PNP_PSEAE
sp|Q9HVA2|ILVC_PSEAE
sp|Q9HVC4|RL25_PSEAE
sp|Q9HVI7|GLYA3_PSEAE
sp|Q9HVN5|CLPB_PSEAE
sp|Q9HW11|Y4395_PSEAE
sp|Q9HWC9|RPOC_PSEAE
sp|Q9HWD2|EFG1_PSEAE;sp|Q9I244|EFG2_PSEAE
sp|Q9HWD5|RL3_PSEAE
sp|Q9HWD8|RL2_PSEAE
sp|Q9HWE0|RL22_PSEAE
sp|Q9HWE2|RL16_PSEAE
sp|Q9HWE4|RS17_PSEAE
sp|Q9HWE5|RL14_PSEAE
sp|Q9HWE8|RS14_PSEAE
sp|Q9HWF1|RL18_PSEAE
sp|Q9HWF2|RS5_PSEAE
sp|Q9HWF7|RS13_PSEAE
sp|Q9HX33|SYL_PSEAE
sp|Q9HXZ4|PYRG_PSEAE
sp|Q9HXZ5|ENO_PSEAE
sp|Q9HZ71|RS1_PSEAE
sp|Q9HZE0|DHE2_PSEAE
sp|Q9HZZ2|EFP_PSEAE
sp|Q9I0K4|ACEA_PSEAE
sp|Q9I1M1|ODBB_PSEAE
sp|Q9I2A8|ATOB_PSEAE
sp|Q9I2V5|ACNB_PSEAE
sp|Q9I2W7|RRAAH_PSEAE
sp|Q9I3D1|DLDH2_PSEAE
sp|Q9I3F5|ACNA_PSEAE
sp|Q9I4Z4|PAL_PSEAE
sp|Q9I576|HPPD_PSEAE
sp|Q9I5Y1|ALF_PSEAE
sp|Q9I5Z0|METK_PSEAE
sp|Q9I617|BIOF_PSEAE
sp|Q9I636|MASZ_PSEAE
sp|Q9I685|SAHH_PSEAE
sp|Q9I6M4|DAVT_PSEAE
sp|Q9I6M5|DAVD_PSEAE
sp|Q9I747|HCP1_PSEAE
sp|Q9I7C4|DPO3B_PSEAE
sp|Q9S508|PHZB2_PSEAE
sp|Q9X2T1|THIO_PSEAE
tr|Q9HTD1|Q9HTD1_PSEAE
tr|Q9HTD9|Q9HTD9_PSEAE
tr|Q9HTP2|Q9HTP2_PSEAE
tr|Q9HU38|Q9HU38_PSEAE
tr|Q9HUD3|Q9HUD3_PSEAE
tr|Q9HV54|Q9HV54_PSEAE
tr|Q9HVA3|Q9HVA3_PSEAE
tr|Q9HVJ1|Q9HVJ1_PSEAE
tr|Q9HVY4|Q9HVY4_PSEAE
tr|Q9HW49|Q9HW49_PSEAE
tr|Q9HW72|Q9HW72_PSEAE
tr|Q9HWG9|Q9HWG9_PSEAE
tr|Q9HWU6|Q9HWU6_PSEAE
tr|Q9HWV0|Q9HWV0_PSEAE
tr|Q9I2C4|Q9I2C4_PSEAE;tr|Q9HX05|Q9HX05_PSEAE
tr|Q9HXA3|Q9HXA3_PSEAE
tr|Q9HXA5|Q9HXA5_PSEAE
tr|Q9HY12|Q9HY12_PSEAE
tr|Q9HY13|Q9HY13_PSEAE
tr|Q9HY77|Q9HY77_PSEAE
tr|Q9HY81|Q9HY81_PSEAE
tr|Q9HYM3|Q9HYM3_PSEAE
tr|Q9HYT5|Q9HYT5_PSEAE
tr|Q9HZK4|Q9HZK4_PSEAE
tr|Q9I028|Q9I028_PSEAE
tr|Q9I0L4|Q9I0L4_PSEAE
tr|Q9I0L5|Q9I0L5_PSEAE
tr|Q9I0T1|Q9I0T1_PSEAE
tr|Q9I1E7|Q9I1E7_PSEAE
tr|Q9I1H5|Q9I1H5_PSEAE
tr|Q9I1N7|Q9I1N7_PSEAE
tr|Q9I246|Q9I246_PSEAE
tr|Q9I299|Q9I299_PSEAE
tr|Q9I2A9|Q9I2A9_PSEAE
tr|Q9I2J2|Q9I2J2_PSEAE
tr|Q9I2R2|Q9I2R2_PSEAE
tr|Q9I2R5|Q9I2R5_PSEAE
tr|Q9I2S3|Q9I2S3_PSEAE
tr|Q9I2V3|Q9I2V3_PSEAE
tr|Q9I2W9|Q9I2W9_PSEAE
tr|Q9I2Z1|Q9I2Z1_PSEAE
tr|Q9I3B2|Q9I3B2_PSEAE
tr|Q9I3D3|Q9I3D3_PSEAE
tr|Q9I3D4|Q9I3D4_PSEAE
tr|Q9I3D5|Q9I3D5_PSEAE
tr|Q9I4I1|Q9I4I1_PSEAE
tr|Q9I5E3|Q9I5E3_PSEAE
tr|Q9I5F6|Q9I5F6_PSEAE
tr|Q9I5U9|Q9I5U9_PSEAE
tr|Q9I5Y8|Q9I5Y8_PSEAE
tr|Q9I612|Q9I612_PSEAE
tr|Q9I659|Q9I659_PSEAE
tr|Q9I671|Q9I671_PSEAE
tr|Q9I6H5|Q9I6H5_PSEAE
tr|Q9I6Z3|Q9I6Z3_PSEAE
tr|Q9I748|Q9I748_PSEAE
Probe 12 (subtracted)
REV__tr|Q9HWP9|Q9HWP9_PSEAE
REV__tr|Q9I2H4|Q9I2H4_PSEAE
sp|G3XD94|UGND_PSEAE
sp|O30508|ARUC_PSEAE
sp|O52761|RL17_PSEAE
sp|O86428|ILVE_PSEAE
sp|P08280|RECA_PSEAE
sp|P0C2B2|DSBA_PSEAE
sp|P11436|AMIE_PSEAE
sp|P15276|ALGP_PSEAE
sp|P24474|NIRS_PSEAE
sp|P26276|ALGC_PSEAE
sp|P30720|CH10_PSEAE
sp|P32722|PORD_PSEAE
sp|P47205|LPXC_PSEAE
sp|P57112|STHA_PSEAE
sp|P57668|TPX_PSEAE
sp|Q51422|SYDND_PSEAE
sp|Q9HT14|ATP6_PSEAE
sp|Q9HT19|ATPG_PSEAE
sp|Q9HU21|RMLC_PSEAE
sp|Q9HUC5|HSLU_PSEAE
sp|Q9HUN0|RS18_PSEAE
sp|Q9HUN2|RL9_PSEAE
sp|Q9HVL6|RL21_PSEAE
sp|Q9HVM1|RS20_PSEAE
sp|Q9HVM4|SYI_PSEAE
sp|Q9HVY3|RS9_PSEAE
sp|Q9HWC5|RL11_PSEAE
sp|Q9HWC6|RL1_PSEAE
sp|Q9HWC7|RL10_PSEAE
sp|Q9HWC8|RL7_PSEAE
sp|Q9HWD1|RS7_PSEAE
sp|Q9HWD4|RS10_PSEAE
sp|Q9HWD6|RL4_PSEAE
sp|Q9HWD9|RS19_PSEAE
sp|Q9HWE1|RS3_PSEAE
sp|Q9HWE7|RL5_PSEAE
sp|Q9HWE9|RS8_PSEAE
sp|Q9HWF0|RL6_PSEAE
sp|Q9HWF4|RL15_PSEAE
sp|Q9HWZ6|IPYR_PSEAE
sp|Q9HXI2|SECF_PSEAE
sp|Q9HXQ2|RL19_PSEAE
sp|Q9HXV4|KAD_PSEAE
sp|Q9HYR9|CLPP2_PSEAE
sp|Q9HZP6|ETFB_PSEAE
sp|Q9I047|TAL_PSEAE
sp|Q9I0A0|IF3_PSEAE
sp|Q9I0K0|NUOB_PSEAE
sp|Q9I1L9|DLDH1_PSEAE
sp|Q9I1M0|ODB2_PSEAE
sp|Q9I2U0|CLPX_PSEAE
sp|Q9I2U2|TIG_PSEAE
sp|Q9I3C5|HTPG_PSEAE
sp|Q9I3D2|ODO2_PSEAE
sp|Q9I3E3|Y1574_PSEAE
sp|Q9I4S5|PDXH_PSEAE
sp|Q9I4W3|DAPA_PSEAE
sp|Q9I589|CBPD_PSEAE
sp|Q9I5V8|RS21_PSEAE
sp|Q9I5Y4|PGK_PSEAE
sp|Q9I6G2|Y329_PSEAE
tr|G3XCV5|G3XCV5_PSEAE
tr|G3XCZ9|G3XCZ9_PSEAE
tr|Q9HT45|Q9HT45_PSEAE
tr|Q9HTU9|Q9HTU9_PSEAE
tr|Q9HU11|Q9HU11_PSEAE
tr|Q9HUC3|Q9HUC3_PSEAE
tr|Q9HV96|Q9HV96_PSEAE
tr|Q9HVD5|Q9HVD5_PSEAE
tr|Q9HVF9|Q9HVF9_PSEAE
tr|Q9HVQ3|Q9HVQ3_PSEAE
tr|Q9HVS8|Q9HVS8_PSEAE
tr|Q9HVV5|Q9HVV5_PSEAE
tr|Q9HW32|Q9HW32_PSEAE
tr|Q9HW86|Q9HW86_PSEAE
tr|Q9HWK5|Q9HWK5_PSEAE
tr|Q9HWQ0|Q9HWQ0_PSEAE
tr|Q9HX12|Q9HX12_PSEAE
tr|Q9HXI0|Q9HXI0_PSEAE
tr|Q9HXM5|Q9HXM5_PSEAE
tr|Q9HXR8|Q9HXR8_PSEAE
tr|Q9HXU8|Q9HXU8_PSEAE
tr|Q9HZG8|Q9HZG8_PSEAE
tr|Q9I0D5|Q9I0D5_PSEAE
tr|Q9I0H1|Q9I0H1_PSEAE
tr|Q9I0Z9|Q9I0Z9_PSEAE
tr|Q9I1E8|Q9I1E8_PSEAE
tr|Q9I2A2|Q9I2A2_PSEAE
tr|Q9I2A6|Q9I2A6_PSEAE
tr|Q9I2B0|Q9I2B0_PSEAE
tr|Q9I2U9|Q9I2U9_PSEAE
tr|Q9I3Y6|Q9I3Y6_PSEAE
tr|Q9I402|Q9I402_PSEAE;tr|Q9HUA1|Q9HUA1_PSEAE
tr|Q9I4T3|Q9I4T3_PSEAE
tr|Q9I4X1|Q9I4X1_PSEAE
tr|Q9I4Z7|Q9I4Z7_PSEAE
tr|Q9I585|Q9I585_PSEAE
tr|Q9I5I4|Q9I5I4_PSEAE
tr|Q9I5R1|Q9I5R1_PSEAE
tr|Q9I662|Q9I662_PSEAE
tr|Q9I762|Q9I762_PSEAE

## Sheet: 2-2 Sheet3
Protein IDs-Probe 12 (subtracted)	Protein IDs-Probe 12 (full)			Fasta headers	Number of proteins	Peptides	Razor + unique peptides
REV__tr|Q9HWP9|Q9HWP9_PSEAE	REV__tr|Q9HWP9|Q9HWP9_PSEAE			>tr|Q9HWP9|Q9HWP9_PSEAE Uncharacterized protein OS=Pseudomonas aeruginosa (strain ATCC 15692 / PAO1 / 1C / PRS 101 / LMG 12228) GN=PA4132 PE=4 SV=1	1	1	1
REV__tr|Q9I2H4|Q9I2H4_PSEAE	REV__tr|Q9I2H4|Q9I2H4_PSEAE			>tr|Q9I2H4|Q9I2H4_PSEAE Probable chemotaxis transducer OS=Pseudomonas aeruginosa (strain ATCC 15692 / PAO1 / 1C / PRS 101 / LMG 12228) GN=PA1930 PE=4 SV=1	1	1	1
sp|G3XD94|UGND_PSEAE	sp|G3XD94|UGND_PSEAE			>sp|G3XD94|UGND_PSEAE UDP-N-acetyl-D-glucosamine 6-dehydrogenase OS=Pseudomonas aeruginosa (strain ATCC 15692 / PAO1 / 1C / PRS 101 / LMG 12228) GN=wbpA PE=1 SV=1	1	2	2
sp|O30508|ARUC_PSEAE	sp|O30508|ARUC_PSEAE			>sp|O30508|ARUC_PSEAE Succinylornithine transaminase/acetylornithine aminotransferase OS=Pseudomonas aeruginosa (strain ATCC 15692 / PAO1 / 1C / PRS 101 / LMG 12228) GN=aruC PE=1 SV=2	1	1	1
sp|O52761|RL17_PSEAE	sp|O52759|RS4_PSEAE			>sp|O52759|RS4_PSEAE 30S ribosomal protein S4 OS=Pseudomonas aeruginosa (strain ATCC 15692 / PAO1 / 1C / PRS 101 / LMG 12228) GN=rpsD PE=3 SV=2	1	4	4
sp|O86428|ILVE_PSEAE	sp|O52760|RPOA_PSEAE			>sp|O52760|RPOA_PSEAE DNA-directed RNA polymerase subunit alpha OS=Pseudomonas aeruginosa (strain ATCC 15692 / PAO1 / 1C / PRS 101 / LMG 12228) GN=rpoA PE=3 SV=2	1	2	2
sp|P08280|RECA_PSEAE	sp|O52761|RL17_PSEAE			>sp|O52761|RL17_PSEAE 50S ribosomal protein L17 OS=Pseudomonas aeruginosa (strain ATCC 15692 / PAO1 / 1C / PRS 101 / LMG 12228) GN=rplQ PE=3 SV=1	1	2	2
sp|P0C2B2|DSBA_PSEAE	sp|O52762|CATA_PSEAE			>sp|O52762|CATA_PSEAE Catalase OS=Pseudomonas aeruginosa (strain ATCC 15692 / PAO1 / 1C / PRS 101 / LMG 12228) GN=katA PE=1 SV=1	1	15	15
sp|P11436|AMIE_PSEAE	sp|O54439|ACP1_PSEAE			>sp|O54439|ACP1_PSEAE Acyl carrier protein 1 OS=Pseudomonas aeruginosa (strain ATCC 15692 / PAO1 / 1C / PRS 101 / LMG 12228) GN=acpP1 PE=3 SV=4	1	2	2
sp|P15276|ALGP_PSEAE	sp|O68822|AMPA_PSEAE			>sp|O68822|AMPA_PSEAE Cytosol aminopeptidase OS=Pseudomonas aeruginosa (strain ATCC 15692 / PAO1 / 1C / PRS 101 / LMG 12228) GN=pepA PE=3 SV=1	1	3	3
sp|P24474|NIRS_PSEAE	sp|O69753|PHZB1_PSEAE			>sp|O69753|PHZB1_PSEAE Phenazine biosynthesis protein PhzB 1 OS=Pseudomonas aeruginosa (strain ATCC 15692 / PAO1 / 1C / PRS 101 / LMG 12228) GN=phzB1 PE=3 SV=1	1	4	1
sp|P26276|ALGC_PSEAE	sp|O69754|PHZF_PSEAE			>sp|O69754|PHZF_PSEAE Trans-2,3-dihydro-3-hydroxyanthranilate isomerase OS=Pseudomonas aeruginosa (strain ATCC 15692 / PAO1 / 1C / PRS 101 / LMG 12228) GN=phzF1 PE=3 SV=2	1	3	3
sp|P30720|CH10_PSEAE	sp|O82850|RS2_PSEAE			>sp|O82850|RS2_PSEAE 30S ribosomal protein S2 OS=Pseudomonas aeruginosa (strain ATCC 15692 / PAO1 / 1C / PRS 101 / LMG 12228) GN=rpsB PE=3 SV=2	1	5	5
sp|P32722|PORD_PSEAE	sp|O82851|EFTS_PSEAE			>sp|O82851|EFTS_PSEAE Elongation factor Ts OS=Pseudomonas aeruginosa (strain ATCC 15692 / PAO1 / 1C / PRS 101 / LMG 12228) GN=tsf PE=3 SV=1	1	9	9
sp|P47205|LPXC_PSEAE	sp|O86428|ILVE_PSEAE			>sp|O86428|ILVE_PSEAE Branched-chain-amino-acid aminotransferase OS=Pseudomonas aeruginosa (strain ATCC 15692 / PAO1 / 1C / PRS 101 / LMG 12228) GN=ilvE PE=1 SV=2	1	2	2
sp|P57112|STHA_PSEAE	sp|P04739|FMPO_PSEAE			>sp|P04739|FMPO_PSEAE Fimbrial protein OS=Pseudomonas aeruginosa (strain ATCC 15692 / PAO1 / 1C / PRS 101 / LMG 12228) GN=pilA PE=1 SV=1	1	4	4
sp|P57668|TPX_PSEAE	sp|P05384|DBHB_PSEAE			>sp|P05384|DBHB_PSEAE DNA-binding protein HU-beta OS=Pseudomonas aeruginosa (strain ATCC 15692 / PAO1 / 1C / PRS 101 / LMG 12228) GN=hupB PE=1 SV=3	1	2	2
sp|Q51422|SYDND_PSEAE	sp|P08280|RECA_PSEAE			>sp|P08280|RECA_PSEAE Protein RecA OS=Pseudomonas aeruginosa (strain ATCC 15692 / PAO1 / 1C / PRS 101 / LMG 12228) GN=recA PE=3 SV=1	1	1	1
sp|Q9HT14|ATP6_PSEAE	sp|P08308|OTCC_PSEAE			>sp|P08308|OTCC_PSEAE Ornithine carbamoyltransferase, catabolic OS=Pseudomonas aeruginosa (strain ATCC 15692 / PAO1 / 1C / PRS 101 / LMG 12228) GN=arcB PE=1 SV=3	1	13	13
sp|Q9HT19|ATPG_PSEAE	sp|P09591|EFTU_PSEAE			>sp|P09591|EFTU_PSEAE Elongation factor Tu OS=Pseudomonas aeruginosa (strain ATCC 15692 / PAO1 / 1C / PRS 101 / LMG 12228) GN=tufA PE=1 SV=2	1	13	13
sp|Q9HU21|RMLC_PSEAE	sp|P0C2B2|DSBA_PSEAE			>sp|P0C2B2|DSBA_PSEAE Thiol:disulfide interchange protein DsbA OS=Pseudomonas aeruginosa (strain ATCC 15692 / PAO1 / 1C / PRS 101 / LMG 12228) GN=dsbA PE=1 SV=1	1	1	1
sp|Q9HUC5|HSLU_PSEAE	sp|P11221|OPRI_PSEAE			>sp|P11221|OPRI_PSEAE Major outer membrane lipoprotein OS=Pseudomonas aeruginosa (strain ATCC 15692 / PAO1 / 1C / PRS 101 / LMG 12228) GN=oprI PE=3 SV=1	1	1	1
sp|Q9HUN0|RS18_PSEAE	sp|P11436|AMIE_PSEAE			>sp|P11436|AMIE_PSEAE Aliphatic amidase OS=Pseudomonas aeruginosa (strain ATCC 15692 / PAO1 / 1C / PRS 101 / LMG 12228) GN=amiE PE=1 SV=2	1	1	1
sp|Q9HUN2|RL9_PSEAE	sp|P13794|PORF_PSEAE			>sp|P13794|PORF_PSEAE Outer membrane porin F OS=Pseudomonas aeruginosa (strain ATCC 15692 / PAO1 / 1C / PRS 101 / LMG 12228) GN=oprF PE=1 SV=1	1	8	8
sp|Q9HVL6|RL21_PSEAE	sp|P13981|ARCA_PSEAE			>sp|P13981|ARCA_PSEAE Arginine deiminase OS=Pseudomonas aeruginosa (strain ATCC 15692 / PAO1 / 1C / PRS 101 / LMG 12228) GN=arcA PE=1 SV=2	1	17	17
sp|Q9HVM1|RS20_PSEAE	sp|P13982|ARCC_PSEAE			>sp|P13982|ARCC_PSEAE Carbamate kinase OS=Pseudomonas aeruginosa (strain ATCC 15692 / PAO1 / 1C / PRS 101 / LMG 12228) GN=arcC PE=3 SV=1	1	6	6
sp|Q9HVM4|SYI_PSEAE	sp|P14165|CISY_PSEAE			>sp|P14165|CISY_PSEAE Citrate synthase OS=Pseudomonas aeruginosa (strain ATCC 15692 / PAO1 / 1C / PRS 101 / LMG 12228) GN=gltA PE=3 SV=2	1	1	1
sp|Q9HVY3|RS9_PSEAE	sp|P15276|ALGP_PSEAE			>sp|P15276|ALGP_PSEAE Transcriptional regulatory protein AlgP OS=Pseudomonas aeruginosa (strain ATCC 15692 / PAO1 / 1C / PRS 101 / LMG 12228) GN=algP PE=4 SV=2	1	2	2
sp|Q9HWC5|RL11_PSEAE	sp|P24474|NIRS_PSEAE			>sp|P24474|NIRS_PSEAE Nitrite reductase OS=Pseudomonas aeruginosa (strain ATCC 15692 / PAO1 / 1C / PRS 101 / LMG 12228) GN=nirS PE=1 SV=1	1	1	1
sp|Q9HWC6|RL1_PSEAE	sp|P26276|ALGC_PSEAE			>sp|P26276|ALGC_PSEAE Phosphomannomutase/phosphoglucomutase OS=Pseudomonas aeruginosa (strain ATCC 15692 / PAO1 / 1C / PRS 101 / LMG 12228) GN=algC PE=1 SV=4	1	1	1
sp|Q9HWC7|RL10_PSEAE	sp|P28810|MMSA_PSEAE			>sp|P28810|MMSA_PSEAE Methylmalonate-semialdehyde dehydrogenase [acylating] OS=Pseudomonas aeruginosa (strain ATCC 15692 / PAO1 / 1C / PRS 101 / LMG 12228) GN=mmsA PE=1 SV=2	1	1	1
sp|Q9HWC8|RL7_PSEAE	sp|P30718|CH60_PSEAE			>sp|P30718|CH60_PSEAE 60 kDa chaperonin OS=Pseudomonas aeruginosa (strain ATCC 15692 / PAO1 / 1C / PRS 101 / LMG 12228) GN=groL PE=1 SV=3	1	29	29
sp|Q9HWD1|RS7_PSEAE	sp|P30720|CH10_PSEAE			>sp|P30720|CH10_PSEAE 10 kDa chaperonin OS=Pseudomonas aeruginosa (strain ATCC 15692 / PAO1 / 1C / PRS 101 / LMG 12228) GN=groS PE=3 SV=1	1	2	2
sp|Q9HWD4|RS10_PSEAE	sp|P32722|PORD_PSEAE			>sp|P32722|PORD_PSEAE Porin D OS=Pseudomonas aeruginosa (strain ATCC 15692 / PAO1 / 1C / PRS 101 / LMG 12228) GN=oprD PE=1 SV=1	1	1	1
sp|Q9HWD6|RL4_PSEAE	sp|P37798|ACCC_PSEAE			>sp|P37798|ACCC_PSEAE Biotin carboxylase OS=Pseudomonas aeruginosa (strain ATCC 15692 / PAO1 / 1C / PRS 101 / LMG 12228) GN=accC PE=1 SV=1	1	3	3
sp|Q9HWD9|RS19_PSEAE	sp|P37799|BCCP_PSEAE			>sp|P37799|BCCP_PSEAE Biotin carboxyl carrier protein of acetyl-CoA carboxylase OS=Pseudomonas aeruginosa (strain ATCC 15692 / PAO1 / 1C / PRS 101 / LMG 12228) GN=accB PE=3 SV=1	1	5	5
sp|Q9HWE1|RS3_PSEAE	sp|P43336|PHHC_PSEAE			>sp|P43336|PHHC_PSEAE Aromatic-amino-acid aminotransferase OS=Pseudomonas aeruginosa (strain ATCC 15692 / PAO1 / 1C / PRS 101 / LMG 12228) GN=phhC PE=3 SV=2	1	3	3
sp|Q9HWE7|RL5_PSEAE	sp|P47204|FTSZ_PSEAE			>sp|P47204|FTSZ_PSEAE Cell division protein FtsZ OS=Pseudomonas aeruginosa (strain ATCC 15692 / PAO1 / 1C / PRS 101 / LMG 12228) GN=ftsZ PE=1 SV=2	1	2	2
sp|Q9HWE9|RS8_PSEAE	sp|P47205|LPXC_PSEAE			>sp|P47205|LPXC_PSEAE UDP-3-O-acyl-N-acetylglucosamine deacetylase OS=Pseudomonas aeruginosa (strain ATCC 15692 / PAO1 / 1C / PRS 101 / LMG 12228) GN=lpxC PE=1 SV=2	1	1	1
sp|Q9HWF0|RL6_PSEAE	sp|P53593|SUCC_PSEAE			>sp|P53593|SUCC_PSEAE Succinyl-CoA ligase [ADP-forming] subunit beta OS=Pseudomonas aeruginosa (strain ATCC 15692 / PAO1 / 1C / PRS 101 / LMG 12228) GN=sucC PE=3 SV=2	1	10	10
sp|Q9HWF4|RL15_PSEAE	sp|P53641|SODF_PSEAE			>sp|P53641|SODF_PSEAE Superoxide dismutase [Fe] OS=Pseudomonas aeruginosa (strain ATCC 15692 / PAO1 / 1C / PRS 101 / LMG 12228) GN=sodB PE=3 SV=3	1	5	5
sp|Q9HWZ6|IPYR_PSEAE	sp|P57112|STHA_PSEAE			>sp|P57112|STHA_PSEAE Soluble pyridine nucleotide transhydrogenase OS=Pseudomonas aeruginosa (strain ATCC 15692 / PAO1 / 1C / PRS 101 / LMG 12228) GN=sthA PE=1 SV=2	1	5	5
sp|Q9HXI2|SECF_PSEAE	sp|P57668|TPX_PSEAE			>sp|P57668|TPX_PSEAE Probable thiol peroxidase OS=Pseudomonas aeruginosa (strain ATCC 15692 / PAO1 / 1C / PRS 101 / LMG 12228) GN=tpx PE=3 SV=1	1	2	2
sp|Q9HXQ2|RL19_PSEAE	sp|P72173|AAT_PSEAE			>sp|P72173|AAT_PSEAE Aspartate aminotransferase OS=Pseudomonas aeruginosa (strain ATCC 15692 / PAO1 / 1C / PRS 101 / LMG 12228) GN=aspC PE=3 SV=2	1	2	2
sp|Q9HXV4|KAD_PSEAE	sp|Q51422|SYDND_PSEAE			>sp|Q51422|SYDND_PSEAE Aspartate--tRNA(Asp/Asn) ligase OS=Pseudomonas aeruginosa (strain ATCC 15692 / PAO1 / 1C / PRS 101 / LMG 12228) GN=aspS PE=1 SV=2	1	1	1
sp|Q9HYR9|CLPP2_PSEAE	sp|Q51561|RPOB_PSEAE			>sp|Q51561|RPOB_PSEAE DNA-directed RNA polymerase subunit beta OS=Pseudomonas aeruginosa (strain ATCC 15692 / PAO1 / 1C / PRS 101 / LMG 12228) GN=rpoB PE=3 SV=2	1	2	2
sp|Q9HZP6|ETFB_PSEAE	sp|Q51567|SUCD_PSEAE			>sp|Q51567|SUCD_PSEAE Succinyl-CoA ligase [ADP-forming] subunit alpha OS=Pseudomonas aeruginosa (strain ATCC 15692 / PAO1 / 1C / PRS 101 / LMG 12228) GN=sucD PE=3 SV=2	1	9	9
sp|Q9I047|TAL_PSEAE	sp|Q59636|NDK_PSEAE			>sp|Q59636|NDK_PSEAE Nucleoside diphosphate kinase OS=Pseudomonas aeruginosa (strain ATCC 15692 / PAO1 / 1C / PRS 101 / LMG 12228) GN=ndk PE=3 SV=2	1	4	4
sp|Q9I0A0|IF3_PSEAE	sp|Q59637|ODP1_PSEAE			>sp|Q59637|ODP1_PSEAE Pyruvate dehydrogenase E1 component OS=Pseudomonas aeruginosa (strain ATCC 15692 / PAO1 / 1C / PRS 101 / LMG 12228) GN=aceE PE=3 SV=2	1	11	11
sp|Q9I0K0|NUOB_PSEAE	sp|Q59638|ODP2_PSEAE			>sp|Q59638|ODP2_PSEAE Dihydrolipoyllysine-residue acetyltransferase component of pyruvate dehydrogenase complex OS=Pseudomonas aeruginosa (strain ATCC 15692 / PAO1 / 1C / PRS 101 / LMG 12228) GN=aceF PE=2 SV=2	1	5	5
sp|Q9I1L9|DLDH1_PSEAE	sp|Q9HT14|ATP6_PSEAE			>sp|Q9HT14|ATP6_PSEAE ATP synthase subunit a OS=Pseudomonas aeruginosa (strain ATCC 15692 / PAO1 / 1C / PRS 101 / LMG 12228) GN=atpB PE=3 SV=1	1	3	3
sp|Q9I1M0|ODB2_PSEAE	sp|Q9HT16|ATPF_PSEAE			>sp|Q9HT16|ATPF_PSEAE ATP synthase subunit b OS=Pseudomonas aeruginosa (strain ATCC 15692 / PAO1 / 1C / PRS 101 / LMG 12228) GN=atpF PE=3 SV=1	1	5	5
sp|Q9I2U0|CLPX_PSEAE	sp|Q9HT18|ATPA_PSEAE			>sp|Q9HT18|ATPA_PSEAE ATP synthase subunit alpha OS=Pseudomonas aeruginosa (strain ATCC 15692 / PAO1 / 1C / PRS 101 / LMG 12228) GN=atpA PE=3 SV=1	1	13	13
sp|Q9I2U2|TIG_PSEAE	sp|Q9HT19|ATPG_PSEAE			>sp|Q9HT19|ATPG_PSEAE ATP synthase gamma chain OS=Pseudomonas aeruginosa (strain ATCC 15692 / PAO1 / 1C / PRS 101 / LMG 12228) GN=atpG PE=3 SV=1	1	3	3
sp|Q9I3C5|HTPG_PSEAE	sp|Q9HT20|ATPB_PSEAE			>sp|Q9HT20|ATPB_PSEAE ATP synthase subunit beta OS=Pseudomonas aeruginosa (strain ATCC 15692 / PAO1 / 1C / PRS 101 / LMG 12228) GN=atpD PE=3 SV=1	1	14	14
sp|Q9I3D2|ODO2_PSEAE	sp|Q9HT21|ATPE_PSEAE			>sp|Q9HT21|ATPE_PSEAE ATP synthase epsilon chain OS=Pseudomonas aeruginosa (strain ATCC 15692 / PAO1 / 1C / PRS 101 / LMG 12228) GN=atpC PE=3 SV=1	1	3	3
sp|Q9I3E3|Y1574_PSEAE	sp|Q9HT95|ATSE4_PSEAE			>sp|Q9HT95|ATSE4_PSEAE Acetyltransferase PA5475 OS=Pseudomonas aeruginosa (strain ATCC 15692 / PAO1 / 1C / PRS 101 / LMG 12228) GN=PA5475 PE=3 SV=1	1	1	1
sp|Q9I4S5|PDXH_PSEAE	sp|Q9HTD7|ASPA_PSEAE			>sp|Q9HTD7|ASPA_PSEAE Aspartate ammonia-lyase OS=Pseudomonas aeruginosa (strain ATCC 15692 / PAO1 / 1C / PRS 101 / LMG 12228) GN=aspA PE=3 SV=1	1	6	6
sp|Q9I4W3|DAPA_PSEAE	sp|Q9HTN8|RL28_PSEAE			>sp|Q9HTN8|RL28_PSEAE 50S ribosomal protein L28 OS=Pseudomonas aeruginosa (strain ATCC 15692 / PAO1 / 1C / PRS 101 / LMG 12228) GN=rpmB PE=3 SV=1	1	1	1
sp|Q9I589|CBPD_PSEAE	sp|Q9HU21|RMLC_PSEAE			>sp|Q9HU21|RMLC_PSEAE dTDP-4-dehydrorhamnose 3,5-epimerase OS=Pseudomonas aeruginosa (strain ATCC 15692 / PAO1 / 1C / PRS 101 / LMG 12228) GN=rmlC PE=1 SV=1	1	1	1
sp|Q9I5V8|RS21_PSEAE	sp|Q9HU65|GLNA_PSEAE			>sp|Q9HU65|GLNA_PSEAE Glutamine synthetase OS=Pseudomonas aeruginosa (strain ATCC 15692 / PAO1 / 1C / PRS 101 / LMG 12228) GN=glnA PE=1 SV=1	1	4	4
sp|Q9I5Y4|PGK_PSEAE	sp|Q9HUC5|HSLU_PSEAE			>sp|Q9HUC5|HSLU_PSEAE ATP-dependent protease ATPase subunit HslU OS=Pseudomonas aeruginosa (strain ATCC 15692 / PAO1 / 1C / PRS 101 / LMG 12228) GN=hslU PE=3 SV=1	1	4	4
sp|Q9I6G2|Y329_PSEAE	sp|Q9HUC8|SYR_PSEAE			>sp|Q9HUC8|SYR_PSEAE Arginine--tRNA ligase OS=Pseudomonas aeruginosa (strain ATCC 15692 / PAO1 / 1C / PRS 101 / LMG 12228) GN=argS PE=3 SV=1	1	1	1
tr|G3XCV5|G3XCV5_PSEAE	sp|Q9HUM6|PURA_PSEAE			>sp|Q9HUM6|PURA_PSEAE Adenylosuccinate synthetase OS=Pseudomonas aeruginosa (strain ATCC 15692 / PAO1 / 1C / PRS 101 / LMG 12228) GN=purA PE=3 SV=1	1	3	3
tr|G3XCZ9|G3XCZ9_PSEAE	sp|Q9HUM9|RS6_PSEAE			>sp|Q9HUM9|RS6_PSEAE 30S ribosomal protein S6 OS=Pseudomonas aeruginosa (strain ATCC 15692 / PAO1 / 1C / PRS 101 / LMG 12228) GN=rpsF PE=3 SV=1	1	1	1
tr|Q9HT45|Q9HT45_PSEAE	sp|Q9HUN0|RS18_PSEAE			>sp|Q9HUN0|RS18_PSEAE 30S ribosomal protein S18 OS=Pseudomonas aeruginosa (strain ATCC 15692 / PAO1 / 1C / PRS 101 / LMG 12228) GN=rpsR PE=3 SV=1	1	1	1
tr|Q9HTU9|Q9HTU9_PSEAE	sp|Q9HUN2|RL9_PSEAE			>sp|Q9HUN2|RL9_PSEAE 50S ribosomal protein L9 OS=Pseudomonas aeruginosa (strain ATCC 15692 / PAO1 / 1C / PRS 101 / LMG 12228) GN=rplI PE=3 SV=1	1	1	1
tr|Q9HU11|Q9HU11_PSEAE	sp|Q9HV43|DNAK_PSEAE			>sp|Q9HV43|DNAK_PSEAE Chaperone protein DnaK OS=Pseudomonas aeruginosa (strain ATCC 15692 / PAO1 / 1C / PRS 101 / LMG 12228) GN=dnaK PE=3 SV=1	1	12	12
tr|Q9HUC3|Q9HUC3_PSEAE	sp|Q9HV55|IF2_PSEAE			>sp|Q9HV55|IF2_PSEAE Translation initiation factor IF-2 OS=Pseudomonas aeruginosa (strain ATCC 15692 / PAO1 / 1C / PRS 101 / LMG 12228) GN=infB PE=3 SV=1	1	1	1
tr|Q9HV96|Q9HV96_PSEAE	sp|Q9HV59|PNP_PSEAE			>sp|Q9HV59|PNP_PSEAE Polyribonucleotide nucleotidyltransferase OS=Pseudomonas aeruginosa (strain ATCC 15692 / PAO1 / 1C / PRS 101 / LMG 12228) GN=pnp PE=3 SV=1	1	4	4
tr|Q9HVD5|Q9HVD5_PSEAE	sp|Q9HVA2|ILVC_PSEAE			>sp|Q9HVA2|ILVC_PSEAE Ketol-acid reductoisomerase OS=Pseudomonas aeruginosa (strain ATCC 15692 / PAO1 / 1C / PRS 101 / LMG 12228) GN=ilvC PE=1 SV=1	1	3	3
tr|Q9HVF9|Q9HVF9_PSEAE	sp|Q9HVC4|RL25_PSEAE			>sp|Q9HVC4|RL25_PSEAE 50S ribosomal protein L25 OS=Pseudomonas aeruginosa (strain ATCC 15692 / PAO1 / 1C / PRS 101 / LMG 12228) GN=rplY PE=3 SV=1	1	5	5
tr|Q9HVQ3|Q9HVQ3_PSEAE	sp|Q9HVL6|RL21_PSEAE			>sp|Q9HVL6|RL21_PSEAE 50S ribosomal protein L21 OS=Pseudomonas aeruginosa (strain ATCC 15692 / PAO1 / 1C / PRS 101 / LMG 12228) GN=rplU PE=3 SV=1	1	1	1
tr|Q9HVS8|Q9HVS8_PSEAE	sp|Q9HVM1|RS20_PSEAE			>sp|Q9HVM1|RS20_PSEAE 30S ribosomal protein S20 OS=Pseudomonas aeruginosa (strain ATCC 15692 / PAO1 / 1C / PRS 101 / LMG 12228) GN=rpsT PE=1 SV=3	1	1	1
tr|Q9HVV5|Q9HVV5_PSEAE	sp|Q9HVM4|SYI_PSEAE			>sp|Q9HVM4|SYI_PSEAE Isoleucine--tRNA ligase OS=Pseudomonas aeruginosa (strain ATCC 15692 / PAO1 / 1C / PRS 101 / LMG 12228) GN=ileS PE=3 SV=1	1	1	1
tr|Q9HW32|Q9HW32_PSEAE	sp|Q9HVN5|CLPB_PSEAE			>sp|Q9HVN5|CLPB_PSEAE Chaperone protein ClpB OS=Pseudomonas aeruginosa (strain ATCC 15692 / PAO1 / 1C / PRS 101 / LMG 12228) GN=clpB PE=3 SV=1	1	6	4
tr|Q9HW86|Q9HW86_PSEAE	sp|Q9HVY3|RS9_PSEAE			>sp|Q9HVY3|RS9_PSEAE 30S ribosomal protein S9 OS=Pseudomonas aeruginosa (strain ATCC 15692 / PAO1 / 1C / PRS 101 / LMG 12228) GN=rpsI PE=3 SV=1	1	1	1
tr|Q9HWK5|Q9HWK5_PSEAE	sp|Q9HW11|Y4395_PSEAE			>sp|Q9HW11|Y4395_PSEAE UPF0234 protein PA4395 OS=Pseudomonas aeruginosa (strain ATCC 15692 / PAO1 / 1C / PRS 101 / LMG 12228) GN=PA4395 PE=3 SV=1	1	2	2
tr|Q9HWQ0|Q9HWQ0_PSEAE	sp|Q9HWC5|RL11_PSEAE			>sp|Q9HWC5|RL11_PSEAE 50S ribosomal protein L11 OS=Pseudomonas aeruginosa (strain ATCC 15692 / PAO1 / 1C / PRS 101 / LMG 12228) GN=rplK PE=3 SV=1	1	2	2
tr|Q9HX12|Q9HX12_PSEAE	sp|Q9HWC6|RL1_PSEAE			>sp|Q9HWC6|RL1_PSEAE 50S ribosomal protein L1 OS=Pseudomonas aeruginosa (strain ATCC 15692 / PAO1 / 1C / PRS 101 / LMG 12228) GN=rplA PE=3 SV=1	1	2	2
tr|Q9HXI0|Q9HXI0_PSEAE	sp|Q9HWC7|RL10_PSEAE			>sp|Q9HWC7|RL10_PSEAE 50S ribosomal protein L10 OS=Pseudomonas aeruginosa (strain ATCC 15692 / PAO1 / 1C / PRS 101 / LMG 12228) GN=rplJ PE=3 SV=1	1	2	2
tr|Q9HXM5|Q9HXM5_PSEAE	sp|Q9HWC8|RL7_PSEAE			>sp|Q9HWC8|RL7_PSEAE 50S ribosomal protein L7/L12 OS=Pseudomonas aeruginosa (strain ATCC 15692 / PAO1 / 1C / PRS 101 / LMG 12228) GN=rplL PE=3 SV=1	1	2	2
tr|Q9HXR8|Q9HXR8_PSEAE	sp|Q9HWC9|RPOC_PSEAE			>sp|Q9HWC9|RPOC_PSEAE DNA-directed RNA polymerase subunit beta OS=Pseudomonas aeruginosa (strain ATCC 15692 / PAO1 / 1C / PRS 101 / LMG 12228) GN=rpoC PE=3 SV=1	1	6	6
tr|Q9HXU8|Q9HXU8_PSEAE	sp|Q9HWD1|RS7_PSEAE			>sp|Q9HWD1|RS7_PSEAE 30S ribosomal protein S7 OS=Pseudomonas aeruginosa (strain ATCC 15692 / PAO1 / 1C / PRS 101 / LMG 12228) GN=rpsG PE=3 SV=1	1	3	3
tr|Q9HZG8|Q9HZG8_PSEAE	sp|Q9HWD2|EFG1_PSEAE;sp|Q9I244|EFG2_PSEAE			>sp|Q9HWD2|EFG1_PSEAE Elongation factor G 1 OS=Pseudomonas aeruginosa (strain ATCC 15692 / PAO1 / 1C / PRS 101 / LMG 12228) GN=fusA PE=1 SV=1	2	20	20
tr|Q9I0D5|Q9I0D5_PSEAE	sp|Q9HWD4|RS10_PSEAE			>sp|Q9HWD4|RS10_PSEAE 30S ribosomal protein S10 OS=Pseudomonas aeruginosa (strain ATCC 15692 / PAO1 / 1C / PRS 101 / LMG 12228) GN=rpsJ PE=3 SV=1	1	1	1
tr|Q9I0H1|Q9I0H1_PSEAE	sp|Q9HWD5|RL3_PSEAE			>sp|Q9HWD5|RL3_PSEAE 50S ribosomal protein L3 OS=Pseudomonas aeruginosa (strain ATCC 15692 / PAO1 / 1C / PRS 101 / LMG 12228) GN=rplC PE=3 SV=1	1	2	2
tr|Q9I0Z9|Q9I0Z9_PSEAE	sp|Q9HWD6|RL4_PSEAE			>sp|Q9HWD6|RL4_PSEAE 50S ribosomal protein L4 OS=Pseudomonas aeruginosa (strain ATCC 15692 / PAO1 / 1C / PRS 101 / LMG 12228) GN=rplD PE=3 SV=1	1	2	2
tr|Q9I1E8|Q9I1E8_PSEAE	sp|Q9HWD8|RL2_PSEAE			>sp|Q9HWD8|RL2_PSEAE 50S ribosomal protein L2 OS=Pseudomonas aeruginosa (strain ATCC 15692 / PAO1 / 1C / PRS 101 / LMG 12228) GN=rplB PE=3 SV=1	1	5	5
tr|Q9I2A2|Q9I2A2_PSEAE	sp|Q9HWD9|RS19_PSEAE			>sp|Q9HWD9|RS19_PSEAE 30S ribosomal protein S19 OS=Pseudomonas aeruginosa (strain ATCC 15692 / PAO1 / 1C / PRS 101 / LMG 12228) GN=rpsS PE=3 SV=1	1	1	1
tr|Q9I2A6|Q9I2A6_PSEAE	sp|Q9HWE0|RL22_PSEAE			>sp|Q9HWE0|RL22_PSEAE 50S ribosomal protein L22 OS=Pseudomonas aeruginosa (strain ATCC 15692 / PAO1 / 1C / PRS 101 / LMG 12228) GN=rplV PE=3 SV=1	1	3	3
tr|Q9I2B0|Q9I2B0_PSEAE	sp|Q9HWE1|RS3_PSEAE			>sp|Q9HWE1|RS3_PSEAE 30S ribosomal protein S3 OS=Pseudomonas aeruginosa (strain ATCC 15692 / PAO1 / 1C / PRS 101 / LMG 12228) GN=rpsC PE=3 SV=1	1	5	5
tr|Q9I2U9|Q9I2U9_PSEAE	sp|Q9HWE2|RL16_PSEAE			>sp|Q9HWE2|RL16_PSEAE 50S ribosomal protein L16 OS=Pseudomonas aeruginosa (strain ATCC 15692 / PAO1 / 1C / PRS 101 / LMG 12228) GN=rplP PE=3 SV=1	1	3	3
tr|Q9I3Y6|Q9I3Y6_PSEAE	sp|Q9HWE4|RS17_PSEAE			>sp|Q9HWE4|RS17_PSEAE 30S ribosomal protein S17 OS=Pseudomonas aeruginosa (strain ATCC 15692 / PAO1 / 1C / PRS 101 / LMG 12228) GN=rpsQ PE=3 SV=1	1	1	1
tr|Q9I402|Q9I402_PSEAE;tr|Q9HUA1|Q9HUA1_PSEAE	sp|Q9HWE5|RL14_PSEAE			>sp|Q9HWE5|RL14_PSEAE 50S ribosomal protein L14 OS=Pseudomonas aeruginosa (strain ATCC 15692 / PAO1 / 1C / PRS 101 / LMG 12228) GN=rplN PE=3 SV=1	1	3	3
tr|Q9I4T3|Q9I4T3_PSEAE	sp|Q9HWE7|RL5_PSEAE			>sp|Q9HWE7|RL5_PSEAE 50S ribosomal protein L5 OS=Pseudomonas aeruginosa (strain ATCC 15692 / PAO1 / 1C / PRS 101 / LMG 12228) GN=rplE PE=3 SV=1	1	5	5
tr|Q9I4X1|Q9I4X1_PSEAE	sp|Q9HWE8|RS14_PSEAE			>sp|Q9HWE8|RS14_PSEAE 30S ribosomal protein S14 OS=Pseudomonas aeruginosa (strain ATCC 15692 / PAO1 / 1C / PRS 101 / LMG 12228) GN=rpsN PE=3 SV=1	1	3	3
tr|Q9I4Z7|Q9I4Z7_PSEAE	sp|Q9HWE9|RS8_PSEAE			>sp|Q9HWE9|RS8_PSEAE 30S ribosomal protein S8 OS=Pseudomonas aeruginosa (strain ATCC 15692 / PAO1 / 1C / PRS 101 / LMG 12228) GN=rpsH PE=3 SV=1	1	3	3
tr|Q9I585|Q9I585_PSEAE	sp|Q9HWF0|RL6_PSEAE			>sp|Q9HWF0|RL6_PSEAE 50S ribosomal protein L6 OS=Pseudomonas aeruginosa (strain ATCC 15692 / PAO1 / 1C / PRS 101 / LMG 12228) GN=rplF PE=3 SV=1	1	1	1
tr|Q9I5I4|Q9I5I4_PSEAE	sp|Q9HWF1|RL18_PSEAE			>sp|Q9HWF1|RL18_PSEAE 50S ribosomal protein L18 OS=Pseudomonas aeruginosa (strain ATCC 15692 / PAO1 / 1C / PRS 101 / LMG 12228) GN=rplR PE=3 SV=1	1	3	3
tr|Q9I5R1|Q9I5R1_PSEAE	sp|Q9HWF2|RS5_PSEAE			>sp|Q9HWF2|RS5_PSEAE 30S ribosomal protein S5 OS=Pseudomonas aeruginosa (strain ATCC 15692 / PAO1 / 1C / PRS 101 / LMG 12228) GN=rpsE PE=3 SV=1	1	4	4
tr|Q9I662|Q9I662_PSEAE	sp|Q9HWF4|RL15_PSEAE			>sp|Q9HWF4|RL15_PSEAE 50S ribosomal protein L15 OS=Pseudomonas aeruginosa (strain ATCC 15692 / PAO1 / 1C / PRS 101 / LMG 12228) GN=rplO PE=3 SV=1	1	1	1
tr|Q9I762|Q9I762_PSEAE	sp|Q9HWF7|RS13_PSEAE			>sp|Q9HWF7|RS13_PSEAE 30S ribosomal protein S13 OS=Pseudomonas aeruginosa (strain ATCC 15692 / PAO1 / 1C / PRS 101 / LMG 12228) GN=rpsM PE=3 SV=1	1	2	2
	sp|Q9HWZ6|IPYR_PSEAE			>sp|Q9HWZ6|IPYR_PSEAE Inorganic pyrophosphatase OS=Pseudomonas aeruginosa (strain ATCC 15692 / PAO1 / 1C / PRS 101 / LMG 12228) GN=ppa PE=1 SV=1	1	1	1
	sp|Q9HX33|SYL_PSEAE			>sp|Q9HX33|SYL_PSEAE Leucine--tRNA ligase OS=Pseudomonas aeruginosa (strain ATCC 15692 / PAO1 / 1C / PRS 101 / LMG 12228) GN=leuS PE=3 SV=1	1	1	1
	sp|Q9HXI2|SECF_PSEAE			>sp|Q9HXI2|SECF_PSEAE Protein translocase subunit SecF OS=Pseudomonas aeruginosa (strain ATCC 15692 / PAO1 / 1C / PRS 101 / LMG 12228) GN=secF PE=3 SV=1	1	1	1
	sp|Q9HXQ2|RL19_PSEAE			>sp|Q9HXQ2|RL19_PSEAE 50S ribosomal protein L19 OS=Pseudomonas aeruginosa (strain ATCC 15692 / PAO1 / 1C / PRS 101 / LMG 12228) GN=rplS PE=3 SV=1	1	1	1
	sp|Q9HXV4|KAD_PSEAE			>sp|Q9HXV4|KAD_PSEAE Adenylate kinase OS=Pseudomonas aeruginosa (strain ATCC 15692 / PAO1 / 1C / PRS 101 / LMG 12228) GN=adk PE=3 SV=1	1	3	3
	sp|Q9HXZ4|PYRG_PSEAE			>sp|Q9HXZ4|PYRG_PSEAE CTP synthase OS=Pseudomonas aeruginosa (strain ATCC 15692 / PAO1 / 1C / PRS 101 / LMG 12228) GN=pyrG PE=3 SV=1	1	1	1
	sp|Q9HXZ5|ENO_PSEAE			>sp|Q9HXZ5|ENO_PSEAE Enolase OS=Pseudomonas aeruginosa (strain ATCC 15692 / PAO1 / 1C / PRS 101 / LMG 12228) GN=eno PE=3 SV=1	1	4	4
	sp|Q9HYR9|CLPP2_PSEAE			>sp|Q9HYR9|CLPP2_PSEAE ATP-dependent Clp protease proteolytic subunit 2 OS=Pseudomonas aeruginosa (strain ATCC 15692 / PAO1 / 1C / PRS 101 / LMG 12228) GN=clpP2 PE=3 SV=1	1	1	1
	sp|Q9HZ71|RS1_PSEAE			>sp|Q9HZ71|RS1_PSEAE 30S ribosomal protein S1 OS=Pseudomonas aeruginosa (strain ATCC 15692 / PAO1 / 1C / PRS 101 / LMG 12228) GN=rpsA PE=3 SV=1	1	11	11
	sp|Q9HZE0|DHE2_PSEAE			>sp|Q9HZE0|DHE2_PSEAE NAD-specific glutamate dehydrogenase OS=Pseudomonas aeruginosa (strain ATCC 15692 / PAO1 / 1C / PRS 101 / LMG 12228) GN=gdhB PE=1 SV=1	1	3	3
	sp|Q9HZP6|ETFB_PSEAE			>sp|Q9HZP6|ETFB_PSEAE Electron transfer flavoprotein subunit beta OS=Pseudomonas aeruginosa (strain ATCC 15692 / PAO1 / 1C / PRS 101 / LMG 12228) GN=etfB PE=3 SV=1	1	4	4
	sp|Q9HZZ2|EFP_PSEAE			>sp|Q9HZZ2|EFP_PSEAE Elongation factor P OS=Pseudomonas aeruginosa (strain ATCC 15692 / PAO1 / 1C / PRS 101 / LMG 12228) GN=efp PE=1 SV=1	1	2	2
	sp|Q9I047|TAL_PSEAE			>sp|Q9I047|TAL_PSEAE Transaldolase OS=Pseudomonas aeruginosa (strain ATCC 15692 / PAO1 / 1C / PRS 101 / LMG 12228) GN=tal PE=3 SV=1	1	1	1
	sp|Q9I0A0|IF3_PSEAE			>sp|Q9I0A0|IF3_PSEAE Translation initiation factor IF-3 OS=Pseudomonas aeruginosa (strain ATCC 15692 / PAO1 / 1C / PRS 101 / LMG 12228) GN=infC PE=3 SV=1	1	3	3
	sp|Q9I0K0|NUOB_PSEAE			>sp|Q9I0K0|NUOB_PSEAE NADH-quinone oxidoreductase subunit B OS=Pseudomonas aeruginosa (strain ATCC 15692 / PAO1 / 1C / PRS 101 / LMG 12228) GN=nuoB PE=3 SV=1	1	1	1
	sp|Q9I0K4|ACEA_PSEAE			>sp|Q9I0K4|ACEA_PSEAE Isocitrate lyase OS=Pseudomonas aeruginosa (strain ATCC 15692 / PAO1 / 1C / PRS 101 / LMG 12228) GN=PA2634 PE=1 SV=1	1	4	4
	sp|Q9I1L9|DLDH1_PSEAE			>sp|Q9I1L9|DLDH1_PSEAE Dihydrolipoyl dehydrogenase OS=Pseudomonas aeruginosa (strain ATCC 15692 / PAO1 / 1C / PRS 101 / LMG 12228) GN=lpdV PE=1 SV=1	1	3	3
	sp|Q9I1M0|ODB2_PSEAE			>sp|Q9I1M0|ODB2_PSEAE Lipoamide acyltransferase component of branched-chain alpha-keto acid dehydrogenase complex OS=Pseudomonas aeruginosa (strain ATCC 15692 / PAO1 / 1C / PRS 101 / LMG 12228) GN=bkdB PE=1 SV=1	1	2	2
	sp|Q9I2A8|ATOB_PSEAE			>sp|Q9I2A8|ATOB_PSEAE Acetyl-CoA acetyltransferase OS=Pseudomonas aeruginosa (strain ATCC 15692 / PAO1 / 1C / PRS 101 / LMG 12228) GN=atoB PE=3 SV=1	1	10	10
	sp|Q9I2U0|CLPX_PSEAE			>sp|Q9I2U0|CLPX_PSEAE ATP-dependent Clp protease ATP-binding subunit ClpX OS=Pseudomonas aeruginosa (strain ATCC 15692 / PAO1 / 1C / PRS 101 / LMG 12228) GN=clpX PE=3 SV=1	1	1	1
	sp|Q9I2U2|TIG_PSEAE			>sp|Q9I2U2|TIG_PSEAE Trigger factor OS=Pseudomonas aeruginosa (strain ATCC 15692 / PAO1 / 1C / PRS 101 / LMG 12228) GN=tig PE=3 SV=1	1	7	7
	sp|Q9I2V5|ACNB_PSEAE			>sp|Q9I2V5|ACNB_PSEAE Aconitate hydratase B OS=Pseudomonas aeruginosa (strain ATCC 15692 / PAO1 / 1C / PRS 101 / LMG 12228) GN=acnB PE=3 SV=1	1	15	15
	sp|Q9I2W7|RRAAH_PSEAE			>sp|Q9I2W7|RRAAH_PSEAE Putative 4-hydroxy-4-methyl-2-oxoglutarate aldolase OS=Pseudomonas aeruginosa (strain ATCC 15692 / PAO1 / 1C / PRS 101 / LMG 12228) GN=PA1772 PE=1 SV=1	1	3	3
	sp|Q9I3C5|HTPG_PSEAE			>sp|Q9I3C5|HTPG_PSEAE Chaperone protein HtpG OS=Pseudomonas aeruginosa (strain ATCC 15692 / PAO1 / 1C / PRS 101 / LMG 12228) GN=htpG PE=3 SV=1	1	9	9
	sp|Q9I3D1|DLDH2_PSEAE			>sp|Q9I3D1|DLDH2_PSEAE Dihydrolipoyl dehydrogenase OS=Pseudomonas aeruginosa (strain ATCC 15692 / PAO1 / 1C / PRS 101 / LMG 12228) GN=lpdG PE=3 SV=1	1	10	10
	sp|Q9I3D2|ODO2_PSEAE			>sp|Q9I3D2|ODO2_PSEAE Dihydrolipoyllysine-residue succinyltransferase component of 2-oxoglutarate dehydrogenase complex OS=Pseudomonas aeruginosa (strain ATCC 15692 / PAO1 / 1C / PRS 101 / LMG 12228) GN=sucB PE=3 SV=1	1	7	7
	sp|Q9I3E3|Y1574_PSEAE			>sp|Q9I3E3|Y1574_PSEAE UPF0345 protein PA1574 OS=Pseudomonas aeruginosa (strain ATCC 15692 / PAO1 / 1C / PRS 101 / LMG 12228) GN=PA1574 PE=3 SV=1	1	1	1
	sp|Q9I3F5|ACNA_PSEAE			>sp|Q9I3F5|ACNA_PSEAE Aconitate hydratase A OS=Pseudomonas aeruginosa (strain ATCC 15692 / PAO1 / 1C / PRS 101 / LMG 12228) GN=acnA PE=3 SV=1	1	14	14
	sp|Q9I4S5|PDXH_PSEAE			>sp|Q9I4S5|PDXH_PSEAE Pyridoxine/pyridoxamine 5-phosphate oxidase OS=Pseudomonas aeruginosa (strain ATCC 15692 / PAO1 / 1C / PRS 101 / LMG 12228) GN=pdxH PE=3 SV=1	1	1	1
	sp|Q9I4W3|DAPA_PSEAE			>sp|Q9I4W3|DAPA_PSEAE 4-hydroxy-tetrahydrodipicolinate synthase OS=Pseudomonas aeruginosa (strain ATCC 15692 / PAO1 / 1C / PRS 101 / LMG 12228) GN=dapA PE=1 SV=1	1	1	1
	sp|Q9I4Z4|PAL_PSEAE			>sp|Q9I4Z4|PAL_PSEAE Peptidoglycan-associated lipoprotein OS=Pseudomonas aeruginosa (strain ATCC 15692 / PAO1 / 1C / PRS 101 / LMG 12228) GN=pal PE=3 SV=1	1	2	2
	sp|Q9I576|HPPD_PSEAE			>sp|Q9I576|HPPD_PSEAE 4-hydroxyphenylpyruvate dioxygenase OS=Pseudomonas aeruginosa (strain ATCC 15692 / PAO1 / 1C / PRS 101 / LMG 12228) GN=hpd PE=3 SV=1	1	6	6
	sp|Q9I589|CBPD_PSEAE			>sp|Q9I589|CBPD_PSEAE Chitin-binding protein CbpD OS=Pseudomonas aeruginosa (strain ATCC 15692 / PAO1 / 1C / PRS 101 / LMG 12228) GN=cbpD PE=1 SV=1	1	1	1
	sp|Q9I5V8|RS21_PSEAE			>sp|Q9I5V8|RS21_PSEAE 30S ribosomal protein S21 OS=Pseudomonas aeruginosa (strain ATCC 15692 / PAO1 / 1C / PRS 101 / LMG 12228) GN=rpsU PE=1 SV=3	1	3	3
	sp|Q9I5Y1|ALF_PSEAE			>sp|Q9I5Y1|ALF_PSEAE Fructose-bisphosphate aldolase OS=Pseudomonas aeruginosa (strain ATCC 15692 / PAO1 / 1C / PRS 101 / LMG 12228) GN=fba PE=3 SV=1	1	5	5
	sp|Q9I5Y4|PGK_PSEAE			>sp|Q9I5Y4|PGK_PSEAE Phosphoglycerate kinase OS=Pseudomonas aeruginosa (strain ATCC 15692 / PAO1 / 1C / PRS 101 / LMG 12228) GN=pgk PE=3 SV=1	1	1	1
	sp|Q9I5Z0|METK_PSEAE			>sp|Q9I5Z0|METK_PSEAE S-adenosylmethionine synthase OS=Pseudomonas aeruginosa (strain ATCC 15692 / PAO1 / 1C / PRS 101 / LMG 12228) GN=metK PE=3 SV=1	1	4	4
	sp|Q9I617|BIOF_PSEAE			>sp|Q9I617|BIOF_PSEAE 8-amino-7-oxononanoate synthase OS=Pseudomonas aeruginosa (strain ATCC 15692 / PAO1 / 1C / PRS 101 / LMG 12228) GN=bioF PE=3 SV=1	1	1	1
	sp|Q9I636|MASZ_PSEAE			>sp|Q9I636|MASZ_PSEAE Malate synthase G OS=Pseudomonas aeruginosa (strain ATCC 15692 / PAO1 / 1C / PRS 101 / LMG 12228) GN=glcB PE=3 SV=1	1	2	2
	sp|Q9I685|SAHH_PSEAE			>sp|Q9I685|SAHH_PSEAE Adenosylhomocysteinase OS=Pseudomonas aeruginosa (strain ATCC 15692 / PAO1 / 1C / PRS 101 / LMG 12228) GN=ahcY PE=3 SV=1	1	9	9
	sp|Q9I6G2|Y329_PSEAE			>sp|Q9I6G2|Y329_PSEAE UPF0339 protein PA0329 OS=Pseudomonas aeruginosa (strain ATCC 15692 / PAO1 / 1C / PRS 101 / LMG 12228) GN=PA0329 PE=3 SV=1	1	1	1
	sp|Q9I6M4|DAVT_PSEAE			>sp|Q9I6M4|DAVT_PSEAE 5-aminovalerate aminotransferase DavT OS=Pseudomonas aeruginosa (strain ATCC 15692 / PAO1 / 1C / PRS 101 / LMG 12228) GN=davT PE=1 SV=1	1	7	7
	sp|Q9I6M5|DAVD_PSEAE			>sp|Q9I6M5|DAVD_PSEAE Glutarate-semialdehyde dehydrogenase DavD OS=Pseudomonas aeruginosa (strain ATCC 15692 / PAO1 / 1C / PRS 101 / LMG 12228) GN=davD PE=1 SV=1	1	4	4
	sp|Q9I747|HCP1_PSEAE			>sp|Q9I747|HCP1_PSEAE Protein hcp1 OS=Pseudomonas aeruginosa (strain ATCC 15692 / PAO1 / 1C / PRS 101 / LMG 12228) GN=hcp1 PE=1 SV=1	1	3	3
	sp|Q9S508|PHZB2_PSEAE			>sp|Q9S508|PHZB2_PSEAE Phenazine biosynthesis protein PhzB 2 OS=Pseudomonas aeruginosa (strain ATCC 15692 / PAO1 / 1C / PRS 101 / LMG 12228) GN=phzB2 PE=1 SV=1	1	5	5
	sp|Q9X2T1|THIO_PSEAE			>sp|Q9X2T1|THIO_PSEAE Thioredoxin OS=Pseudomonas aeruginosa (strain ATCC 15692 / PAO1 / 1C / PRS 101 / LMG 12228) GN=trxA PE=3 SV=1	1	3	3
	tr|G3XCV5|G3XCV5_PSEAE			>tr|G3XCV5|G3XCV5_PSEAE Poly(3-hydroxyalkanoic acid) synthase 1 OS=Pseudomonas aeruginosa (strain ATCC 15692 / PAO1 / 1C / PRS 101 / LMG 12228) GN=phaC1 PE=4 SV=1	1	1	1
	tr|G3XCZ9|G3XCZ9_PSEAE			>tr|G3XCZ9|G3XCZ9_PSEAE Poly(3-hydroxyalkanoic acid) synthase 2 OS=Pseudomonas aeruginosa (strain ATCC 15692 / PAO1 / 1C / PRS 101 / LMG 12228) GN=phaC2 PE=4 SV=1	1	1	1
	tr|Q9HT45|Q9HT45_PSEAE			>tr|Q9HT45|Q9HT45_PSEAE Uncharacterized protein OS=Pseudomonas aeruginosa (strain ATCC 15692 / PAO1 / 1C / PRS 101 / LMG 12228) GN=PA5528 PE=4 SV=1	1	1	1
	tr|Q9HTD1|Q9HTD1_PSEAE			>tr|Q9HTD1|Q9HTD1_PSEAE Probable transcarboxylase subunit OS=Pseudomonas aeruginosa (strain ATCC 15692 / PAO1 / 1C / PRS 101 / LMG 12228) GN=PA5435 PE=4 SV=1	1	29	29
	tr|Q9HTD9|Q9HTD9_PSEAE			>tr|Q9HTD9|Q9HTD9_PSEAE Alcohol dehydrogenase OS=Pseudomonas aeruginosa (strain ATCC 15692 / PAO1 / 1C / PRS 101 / LMG 12228) GN=adhA PE=1 SV=1	1	6	6
	tr|Q9HTP2|Q9HTP2_PSEAE			>tr|Q9HTP2|Q9HTP2_PSEAE Probable aldehyde dehydrogenase OS=Pseudomonas aeruginosa (strain ATCC 15692 / PAO1 / 1C / PRS 101 / LMG 12228) GN=PA5312 PE=3 SV=1	1	9	9
	tr|Q9HTU9|Q9HTU9_PSEAE			>tr|Q9HTU9|Q9HTU9_PSEAE Uncharacterized protein OS=Pseudomonas aeruginosa (strain ATCC 15692 / PAO1 / 1C / PRS 101 / LMG 12228) GN=PA5245 PE=4 SV=1	1	1	1
	tr|Q9HU11|Q9HU11_PSEAE			>tr|Q9HU11|Q9HU11_PSEAE Uncharacterized protein OS=Pseudomonas aeruginosa (strain ATCC 15692 / PAO1 / 1C / PRS 101 / LMG 12228) GN=PA5178 PE=4 SV=1	1	6	6
	tr|Q9HU38|Q9HU38_PSEAE			>tr|Q9HU38|Q9HU38_PSEAE Uncharacterized protein OS=Pseudomonas aeruginosa (strain ATCC 15692 / PAO1 / 1C / PRS 101 / LMG 12228) GN=PA5146 PE=4 SV=1	1	2	2
	tr|Q9HUC3|Q9HUC3_PSEAE			>tr|Q9HUC3|Q9HUC3_PSEAE Polyhydroxyalkanoate synthesis protein PhaF OS=Pseudomonas aeruginosa (strain ATCC 15692 / PAO1 / 1C / PRS 101 / LMG 12228) GN=phaF PE=4 SV=1	1	1	1
	tr|Q9HUD3|Q9HUD3_PSEAE			>tr|Q9HUD3|Q9HUD3_PSEAE Malic enzyme OS=Pseudomonas aeruginosa (strain ATCC 15692 / PAO1 / 1C / PRS 101 / LMG 12228) GN=PA5046 PE=4 SV=1	1	7	7
	tr|Q9HV54|Q9HV54_PSEAE			>tr|Q9HV54|Q9HV54_PSEAE Transcription termination/antitermination protein NusA OS=Pseudomonas aeruginosa (strain ATCC 15692 / PAO1 / 1C / PRS 101 / LMG 12228) GN=nusA PE=3 SV=1	1	2	2
	tr|Q9HV96|Q9HV96_PSEAE			>tr|Q9HV96|Q9HV96_PSEAE Uncharacterized protein OS=Pseudomonas aeruginosa (strain ATCC 15692 / PAO1 / 1C / PRS 101 / LMG 12228) GN=PA4701 PE=4 SV=1	1	2	2
	tr|Q9HVD5|Q9HVD5_PSEAE			>tr|Q9HVD5|Q9HVD5_PSEAE Uncharacterized protein OS=Pseudomonas aeruginosa (strain ATCC 15692 / PAO1 / 1C / PRS 101 / LMG 12228) GN=PA4657 PE=4 SV=1	1	1	1
	tr|Q9HVF9|Q9HVF9_PSEAE			>tr|Q9HVF9|Q9HVF9_PSEAE Uncharacterized protein OS=Pseudomonas aeruginosa (strain ATCC 15692 / PAO1 / 1C / PRS 101 / LMG 12228) GN=PA4632 PE=3 SV=1	1	4	4
	tr|Q9HVJ1|Q9HVJ1_PSEAE			>tr|Q9HVJ1|Q9HVJ1_PSEAE Probable ATP-binding component of ABC transporter OS=Pseudomonas aeruginosa (strain ATCC 15692 / PAO1 / 1C / PRS 101 / LMG 12228) GN=PA4595 PE=4 SV=1	1	7	7
	tr|Q9HVQ3|Q9HVQ3_PSEAE			>tr|Q9HVQ3|Q9HVQ3_PSEAE Ornithine decarboxylase OS=Pseudomonas aeruginosa (strain ATCC 15692 / PAO1 / 1C / PRS 101 / LMG 12228) GN=speC PE=3 SV=1	1	1	1
	tr|Q9HVS8|Q9HVS8_PSEAE			>tr|Q9HVS8|Q9HVS8_PSEAE RoxR OS=Pseudomonas aeruginosa (strain ATCC 15692 / PAO1 / 1C / PRS 101 / LMG 12228) GN=roxR PE=4 SV=1	1	1	1
	tr|Q9HVV5|Q9HVV5_PSEAE			>tr|Q9HVV5|Q9HVV5_PSEAE Uncharacterized protein OS=Pseudomonas aeruginosa (strain ATCC 15692 / PAO1 / 1C / PRS 101 / LMG 12228) GN=PA4463 PE=4 SV=1	1	2	2
	tr|Q9HVY4|Q9HVY4_PSEAE			>tr|Q9HVY4|Q9HVY4_PSEAE Ubiquinol-cytochrome c reductase iron-sulfur subunit OS=Pseudomonas aeruginosa (strain ATCC 15692 / PAO1 / 1C / PRS 101 / LMG 12228) GN=PA4431 PE=4 SV=1	1	1	1
	tr|Q9HW32|Q9HW32_PSEAE			>tr|Q9HW32|Q9HW32_PSEAE Insulin-cleaving metalloproteinase outer membrane protein OS=Pseudomonas aeruginosa (strain ATCC 15692 / PAO1 / 1C / PRS 101 / LMG 12228) GN=icmP PE=4 SV=1	1	4	4
	tr|Q9HW49|Q9HW49_PSEAE			>tr|Q9HW49|Q9HW49_PSEAE Uncharacterized protein OS=Pseudomonas aeruginosa (strain ATCC 15692 / PAO1 / 1C / PRS 101 / LMG 12228) GN=PA4352 PE=3 SV=1	1	10	10
	tr|Q9HW72|Q9HW72_PSEAE			>tr|Q9HW72|Q9HW72_PSEAE Pyruvate kinase OS=Pseudomonas aeruginosa (strain ATCC 15692 / PAO1 / 1C / PRS 101 / LMG 12228) GN=pykA PE=3 SV=1	1	1	1
	tr|Q9HW86|Q9HW86_PSEAE			>tr|Q9HW86|Q9HW86_PSEAE MvaT OS=Pseudomonas aeruginosa (strain ATCC 15692 / PAO1 / 1C / PRS 101 / LMG 12228) GN=mvaT PE=1 SV=1	1	1	1
	tr|Q9HWG9|Q9HWG9_PSEAE			>tr|Q9HWG9|Q9HWG9_PSEAE Flavin-containing monooxygenase OS=Pseudomonas aeruginosa (strain ATCC 15692 / PAO1 / 1C / PRS 101 / LMG 12228) GN=phzS PE=1 SV=1	1	1	1
	tr|Q9HWK5|Q9HWK5_PSEAE			>tr|Q9HWK5|Q9HWK5_PSEAE Peptidylprolyl isomerase OS=Pseudomonas aeruginosa (strain ATCC 15692 / PAO1 / 1C / PRS 101 / LMG 12228) GN=ppiC2 PE=4 SV=1	1	3	3
	tr|Q9HWQ0|Q9HWQ0_PSEAE			>tr|Q9HWQ0|Q9HWQ0_PSEAE Probable iron-sulfur protein OS=Pseudomonas aeruginosa (strain ATCC 15692 / PAO1 / 1C / PRS 101 / LMG 12228) GN=PA4131 PE=4 SV=1	1	1	1
	tr|Q9HWV0|Q9HWV0_PSEAE			>tr|Q9HWV0|Q9HWV0_PSEAE Probable nonribosomal peptide synthetase OS=Pseudomonas aeruginosa (strain ATCC 15692 / PAO1 / 1C / PRS 101 / LMG 12228) GN=PA4078 PE=4 SV=1	1	1	1
	tr|Q9I2C4|Q9I2C4_PSEAE;tr|Q9HX05|Q9HX05_PSEAE			>tr|Q9I2C4|Q9I2C4_PSEAE NAD+ dependent aldehyde dehydrogenase ExaC OS=Pseudomonas aeruginosa (strain ATCC 15692 / PAO1 / 1C / PRS 101 / LMG 12228) GN=exaC PE=3 SV=1;>tr|Q9HX05|Q9HX05_PSEAE Probable aldehyde dehydrogenase OS=Pseudomonas aeruginosa (strain A	2	4	4
	tr|Q9HX12|Q9HX12_PSEAE			>tr|Q9HX12|Q9HX12_PSEAE Uncharacterized protein OS=Pseudomonas aeruginosa (strain ATCC 15692 / PAO1 / 1C / PRS 101 / LMG 12228) GN=PA4015 PE=4 SV=1	1	2	2
	tr|Q9HXA5|Q9HXA5_PSEAE			>tr|Q9HXA5|Q9HXA5_PSEAE Uncharacterized protein OS=Pseudomonas aeruginosa (strain ATCC 15692 / PAO1 / 1C / PRS 101 / LMG 12228) GN=PA3908 PE=4 SV=1	1	1	1
	tr|Q9HXI0|Q9HXI0_PSEAE			>tr|Q9HXI0|Q9HXI0_PSEAE Uncharacterized protein OS=Pseudomonas aeruginosa (strain ATCC 15692 / PAO1 / 1C / PRS 101 / LMG 12228) GN=PA3822 PE=4 SV=1	1	1	1
	tr|Q9HXM5|Q9HXM5_PSEAE			>tr|Q9HXM5|Q9HXM5_PSEAE Inosine-5-monophosphate dehydrogenase OS=Pseudomonas aeruginosa (strain ATCC 15692 / PAO1 / 1C / PRS 101 / LMG 12228) GN=guaB PE=1 SV=1	1	2	2
	tr|Q9HXR8|Q9HXR8_PSEAE			>tr|Q9HXR8|Q9HXR8_PSEAE Probable FMN oxidoreductase OS=Pseudomonas aeruginosa (strain ATCC 15692 / PAO1 / 1C / PRS 101 / LMG 12228) GN=PA3723 PE=4 SV=1	1	3	3
	tr|Q9HXU8|Q9HXU8_PSEAE			>tr|Q9HXU8|Q9HXU8_PSEAE Lipotoxon F, LptF OS=Pseudomonas aeruginosa (strain ATCC 15692 / PAO1 / 1C / PRS 101 / LMG 12228) GN=lptF PE=3 SV=1	1	1	1
	tr|Q9HY13|Q9HY13_PSEAE			>tr|Q9HY13|Q9HY13_PSEAE Uncharacterized protein OS=Pseudomonas aeruginosa (strain ATCC 15692 / PAO1 / 1C / PRS 101 / LMG 12228) GN=PA3613 PE=4 SV=1	1	2	2
	tr|Q9HY77|Q9HY77_PSEAE			>tr|Q9HY77|Q9HY77_PSEAE Glutaredoxin OS=Pseudomonas aeruginosa (strain ATCC 15692 / PAO1 / 1C / PRS 101 / LMG 12228) GN=PA3533 PE=3 SV=1	1	2	2
	tr|Q9HY81|Q9HY81_PSEAE			>tr|Q9HY81|Q9HY81_PSEAE Probable peroxidase OS=Pseudomonas aeruginosa (strain ATCC 15692 / PAO1 / 1C / PRS 101 / LMG 12228) GN=PA3529 PE=1 SV=1	1	7	7
	tr|Q9HYT5|Q9HYT5_PSEAE			>tr|Q9HYT5|Q9HYT5_PSEAE Uncharacterized protein OS=Pseudomonas aeruginosa (strain ATCC 15692 / PAO1 / 1C / PRS 101 / LMG 12228) GN=PA3309 PE=3 SV=1	1	8	8
	tr|Q9HZG8|Q9HZG8_PSEAE			>tr|Q9HZG8|Q9HZG8_PSEAE Uncharacterized protein OS=Pseudomonas aeruginosa (strain ATCC 15692 / PAO1 / 1C / PRS 101 / LMG 12228) GN=PA3040 PE=4 SV=1	1	1	1
	tr|Q9HZK4|Q9HZK4_PSEAE			>tr|Q9HZK4|Q9HZK4_PSEAE Glyceraldehyde-3-phosphate dehydrogenase OS=Pseudomonas aeruginosa (strain ATCC 15692 / PAO1 / 1C / PRS 101 / LMG 12228) GN=PA3001 PE=3 SV=1	1	6	6
	tr|Q9I028|Q9I028_PSEAE			>tr|Q9I028|Q9I028_PSEAE Probable acyl-CoA dehydrogenase OS=Pseudomonas aeruginosa (strain ATCC 15692 / PAO1 / 1C / PRS 101 / LMG 12228) GN=PA2815 PE=4 SV=1	1	5	5
	tr|Q9I0D5|Q9I0D5_PSEAE			>tr|Q9I0D5|Q9I0D5_PSEAE Uncharacterized protein OS=Pseudomonas aeruginosa (strain ATCC 15692 / PAO1 / 1C / PRS 101 / LMG 12228) GN=PA2707 PE=4 SV=1	1	1	1
	tr|Q9I0H1|Q9I0H1_PSEAE			>tr|Q9I0H1|Q9I0H1_PSEAE Uncharacterized protein OS=Pseudomonas aeruginosa (strain ATCC 15692 / PAO1 / 1C / PRS 101 / LMG 12228) GN=PA2667 PE=4 SV=1	1	1	1
	tr|Q9I0L4|Q9I0L4_PSEAE			>tr|Q9I0L4|Q9I0L4_PSEAE Isocitrate dehydrogenase OS=Pseudomonas aeruginosa (strain ATCC 15692 / PAO1 / 1C / PRS 101 / LMG 12228) GN=idh PE=4 SV=1	1	5	5
	tr|Q9I0L5|Q9I0L5_PSEAE			>tr|Q9I0L5|Q9I0L5_PSEAE Isocitrate dehydrogenase [NADP] OS=Pseudomonas aeruginosa (strain ATCC 15692 / PAO1 / 1C / PRS 101 / LMG 12228) GN=icd PE=3 SV=1	1	10	10
	tr|Q9I0T1|Q9I0T1_PSEAE			>tr|Q9I0T1|Q9I0T1_PSEAE Probable acyl-CoA thiolase OS=Pseudomonas aeruginosa (strain ATCC 15692 / PAO1 / 1C / PRS 101 / LMG 12228) GN=PA2553 PE=3 SV=1	1	4	4
	tr|Q9I0Z9|Q9I0Z9_PSEAE			>tr|Q9I0Z9|Q9I0Z9_PSEAE Uncharacterized protein OS=Pseudomonas aeruginosa (strain ATCC 15692 / PAO1 / 1C / PRS 101 / LMG 12228) GN=PA2483 PE=4 SV=1	1	2	2
	tr|Q9I1E7|Q9I1E7_PSEAE			>tr|Q9I1E7|Q9I1E7_PSEAE Alkyl hydroperoxide reductase AhpD OS=Pseudomonas aeruginosa (strain ATCC 15692 / PAO1 / 1C / PRS 101 / LMG 12228) GN=PA2331 PE=3 SV=1	1	4	4
	tr|Q9I1E8|Q9I1E8_PSEAE			>tr|Q9I1E8|Q9I1E8_PSEAE Uncharacterized protein OS=Pseudomonas aeruginosa (strain ATCC 15692 / PAO1 / 1C / PRS 101 / LMG 12228) GN=PA2330 PE=4 SV=1	1	1	1
	tr|Q9I1H5|Q9I1H5_PSEAE			>tr|Q9I1H5|Q9I1H5_PSEAE Chitinase OS=Pseudomonas aeruginosa (strain ATCC 15692 / PAO1 / 1C / PRS 101 / LMG 12228) GN=chiC PE=3 SV=1	1	3	3
	tr|Q9I1N7|Q9I1N7_PSEAE			>tr|Q9I1N7|Q9I1N7_PSEAE PslB OS=Pseudomonas aeruginosa (strain ATCC 15692 / PAO1 / 1C / PRS 101 / LMG 12228) GN=pslB PE=3 SV=1	1	1	1
	tr|Q9I246|Q9I246_PSEAE			>tr|Q9I246|Q9I246_PSEAE Probable carbamoyl transferase OS=Pseudomonas aeruginosa (strain ATCC 15692 / PAO1 / 1C / PRS 101 / LMG 12228) GN=PA2069 PE=4 SV=1	1	1	1
	tr|Q9I299|Q9I299_PSEAE			>tr|Q9I299|Q9I299_PSEAE Methylcrotonyl-CoA carboxylase, alpha-subunit (Biotin-containing) OS=Pseudomonas aeruginosa (strain ATCC 15692 / PAO1 / 1C / PRS 101 / LMG 12228) GN=liuD PE=1 SV=1	1	13	13
	tr|Q9I2A2|Q9I2A2_PSEAE			>tr|Q9I2A2|Q9I2A2_PSEAE Fumarylacetoacetase OS=Pseudomonas aeruginosa (strain ATCC 15692 / PAO1 / 1C / PRS 101 / LMG 12228) GN=fahA PE=4 SV=1	1	1	1
	tr|Q9I2A6|Q9I2A6_PSEAE			>tr|Q9I2A6|Q9I2A6_PSEAE 3-hydroxybutyrate dehydrogenase OS=Pseudomonas aeruginosa (strain ATCC 15692 / PAO1 / 1C / PRS 101 / LMG 12228) GN=bdhA PE=3 SV=1	1	1	1
	tr|Q9I2A9|Q9I2A9_PSEAE			>tr|Q9I2A9|Q9I2A9_PSEAE DhcB, dehydrocarnitine CoA transferase, subunit B OS=Pseudomonas aeruginosa (strain ATCC 15692 / PAO1 / 1C / PRS 101 / LMG 12228) GN=dhcB PE=4 SV=1	1	3	3
	tr|Q9I2B0|Q9I2B0_PSEAE			>tr|Q9I2B0|Q9I2B0_PSEAE DhcA, dehydrocarnitine CoA transferase, subunit A OS=Pseudomonas aeruginosa (strain ATCC 15692 / PAO1 / 1C / PRS 101 / LMG 12228) GN=dhcA PE=4 SV=1	1	1	1
	tr|Q9I2R5|Q9I2R5_PSEAE			>tr|Q9I2R5|Q9I2R5_PSEAE Uncharacterized protein OS=Pseudomonas aeruginosa (strain ATCC 15692 / PAO1 / 1C / PRS 101 / LMG 12228) GN=PA1830 PE=4 SV=1	1	1	1
	tr|Q9I2U9|Q9I2U9_PSEAE			>tr|Q9I2U9|Q9I2U9_PSEAE Peptidyl-prolyl cis-trans isomerase OS=Pseudomonas aeruginosa (strain ATCC 15692 / PAO1 / 1C / PRS 101 / LMG 12228) GN=ppiB PE=3 SV=1	1	2	2
	tr|Q9I2V3|Q9I2V3_PSEAE			>tr|Q9I2V3|Q9I2V3_PSEAE Uncharacterized protein OS=Pseudomonas aeruginosa (strain ATCC 15692 / PAO1 / 1C / PRS 101 / LMG 12228) GN=PA1789 PE=1 SV=1	1	4	4
	tr|Q9I2W9|Q9I2W9_PSEAE			>tr|Q9I2W9|Q9I2W9_PSEAE Phosphoenolpyruvate synthase OS=Pseudomonas aeruginosa (strain ATCC 15692 / PAO1 / 1C / PRS 101 / LMG 12228) GN=ppsA PE=3 SV=1	1	3	3
	tr|Q9I2Z1|Q9I2Z1_PSEAE			>tr|Q9I2Z1|Q9I2Z1_PSEAE Uncharacterized protein OS=Pseudomonas aeruginosa (strain ATCC 15692 / PAO1 / 1C / PRS 101 / LMG 12228) GN=PA1746 PE=4 SV=1	1	1	1
	tr|Q9I3B2|Q9I3B2_PSEAE			>tr|Q9I3B2|Q9I3B2_PSEAE Beta-ketoacyl-ACP synthase I OS=Pseudomonas aeruginosa (strain ATCC 15692 / PAO1 / 1C / PRS 101 / LMG 12228) GN=fabB PE=3 SV=1	1	2	2
	tr|Q9I3D3|Q9I3D3_PSEAE			>tr|Q9I3D3|Q9I3D3_PSEAE 2-oxoglutarate dehydrogenase (E1 subunit) OS=Pseudomonas aeruginosa (strain ATCC 15692 / PAO1 / 1C / PRS 101 / LMG 12228) GN=sucA PE=4 SV=1	1	6	6
	tr|Q9I3D4|Q9I3D4_PSEAE			>tr|Q9I3D4|Q9I3D4_PSEAE Succinate dehydrogenase (B subunit) OS=Pseudomonas aeruginosa (strain ATCC 15692 / PAO1 / 1C / PRS 101 / LMG 12228) GN=sdhB PE=4 SV=1	1	4	4
	tr|Q9I3D5|Q9I3D5_PSEAE			>tr|Q9I3D5|Q9I3D5_PSEAE Succinate dehydrogenase flavoprotein subunit OS=Pseudomonas aeruginosa (strain ATCC 15692 / PAO1 / 1C / PRS 101 / LMG 12228) GN=sdhA PE=3 SV=1	1	7	7
	tr|Q9I3Y6|Q9I3Y6_PSEAE			>tr|Q9I3Y6|Q9I3Y6_PSEAE Uncharacterized protein OS=Pseudomonas aeruginosa (strain ATCC 15692 / PAO1 / 1C / PRS 101 / LMG 12228) GN=PA1358 PE=1 SV=1	1	1	1
	tr|Q9I402|Q9I402_PSEAE;tr|Q9HUA1|Q9HUA1_PSEAE			>tr|Q9I402|Q9I402_PSEAE Probable binding protein component of ABC transporter OS=Pseudomonas aeruginosa (strain ATCC 15692 / PAO1 / 1C / PRS 101 / LMG 12228) GN=PA1342 PE=4 SV=1	2	3	3
	tr|Q9I4I1|Q9I4I1_PSEAE			>tr|Q9I4I1|Q9I4I1_PSEAE Ribonucleoside-diphosphate reductase OS=Pseudomonas aeruginosa (strain ATCC 15692 / PAO1 / 1C / PRS 101 / LMG 12228) GN=nrdA PE=3 SV=1	1	1	1
	tr|Q9I4T3|Q9I4T3_PSEAE			>tr|Q9I4T3|Q9I4T3_PSEAE Probable outer membrane protein OS=Pseudomonas aeruginosa (strain ATCC 15692 / PAO1 / 1C / PRS 101 / LMG 12228) GN=PA1041 PE=3 SV=1	1	1	1
	tr|Q9I4X1|Q9I4X1_PSEAE			>tr|Q9I4X1|Q9I4X1_PSEAE PqsC OS=Pseudomonas aeruginosa (strain ATCC 15692 / PAO1 / 1C / PRS 101 / LMG 12228) GN=pqsC PE=1 SV=1	1	1	1
	tr|Q9I4Z7|Q9I4Z7_PSEAE			>tr|Q9I4Z7|Q9I4Z7_PSEAE Probable dna-binding stress protein OS=Pseudomonas aeruginosa (strain ATCC 15692 / PAO1 / 1C / PRS 101 / LMG 12228) GN=PA0962 PE=3 SV=1	1	2	2
	tr|Q9I585|Q9I585_PSEAE			>tr|Q9I585|Q9I585_PSEAE Uncharacterized protein OS=Pseudomonas aeruginosa (strain ATCC 15692 / PAO1 / 1C / PRS 101 / LMG 12228) GN=PA0856 PE=1 SV=1	1	1	1
	tr|Q9I5E3|Q9I5E3_PSEAE			>tr|Q9I5E3|Q9I5E3_PSEAE Citrate synthase OS=Pseudomonas aeruginosa (strain ATCC 15692 / PAO1 / 1C / PRS 101 / LMG 12228) GN=prpC PE=3 SV=1	1	2	2
	tr|Q9I5I4|Q9I5I4_PSEAE			>tr|Q9I5I4|Q9I5I4_PSEAE Probable enoyl-CoA hydratase/isomerase OS=Pseudomonas aeruginosa (strain ATCC 15692 / PAO1 / 1C / PRS 101 / LMG 12228) GN=PA0745 PE=3 SV=1	1	2	2
	tr|Q9I5R1|Q9I5R1_PSEAE			>tr|Q9I5R1|Q9I5R1_PSEAE Uncharacterized protein OS=Pseudomonas aeruginosa (strain ATCC 15692 / PAO1 / 1C / PRS 101 / LMG 12228) GN=PA0660 PE=4 SV=1	1	2	2
	tr|Q9I5U9|Q9I5U9_PSEAE			>tr|Q9I5U9|Q9I5U9_PSEAE Uncharacterized protein OS=Pseudomonas aeruginosa (strain ATCC 15692 / PAO1 / 1C / PRS 101 / LMG 12228) GN=PA0588 PE=4 SV=1	1	13	13
	tr|Q9I5Y8|Q9I5Y8_PSEAE			>tr|Q9I5Y8|Q9I5Y8_PSEAE Transketolase OS=Pseudomonas aeruginosa (strain ATCC 15692 / PAO1 / 1C / PRS 101 / LMG 12228) GN=tktA PE=1 SV=1	1	1	1
	tr|Q9I612|Q9I612_PSEAE			>tr|Q9I612|Q9I612_PSEAE Probable acyl-CoA dehydrogenase OS=Pseudomonas aeruginosa (strain ATCC 15692 / PAO1 / 1C / PRS 101 / LMG 12228) GN=PA0506 PE=3 SV=1	1	1	1
	tr|Q9I659|Q9I659_PSEAE			>tr|Q9I659|Q9I659_PSEAE Probable ClpA/B protease ATP binding subunit OS=Pseudomonas aeruginosa (strain ATCC 15692 / PAO1 / 1C / PRS 101 / LMG 12228) GN=PA0459 PE=4 SV=1	1	6	6
	tr|Q9I662|Q9I662_PSEAE			>tr|Q9I662|Q9I662_PSEAE Probable cold-shock protein OS=Pseudomonas aeruginosa (strain ATCC 15692 / PAO1 / 1C / PRS 101 / LMG 12228) GN=PA0456 PE=4 SV=1	1	1	1
	tr|Q9I671|Q9I671_PSEAE			>tr|Q9I671|Q9I671_PSEAE Glutaryl-CoA dehydrogenase OS=Pseudomonas aeruginosa (strain ATCC 15692 / PAO1 / 1C / PRS 101 / LMG 12228) GN=gcdH PE=3 SV=1	1	7	7
	tr|Q9I6H5|Q9I6H5_PSEAE			>tr|Q9I6H5|Q9I6H5_PSEAE D-3-phosphoglycerate dehydrogenase OS=Pseudomonas aeruginosa (strain ATCC 15692 / PAO1 / 1C / PRS 101 / LMG 12228) GN=serA PE=3 SV=1	1	2	2
	tr|Q9I6Z3|Q9I6Z3_PSEAE			>tr|Q9I6Z3|Q9I6Z3_PSEAE Alkyl hydroperoxide reductase subunit C OS=Pseudomonas aeruginosa (strain ATCC 15692 / PAO1 / 1C / PRS 101 / LMG 12228) GN=ahpC PE=4 SV=1	1	8	8
	tr|Q9I762|Q9I762_PSEAE			>tr|Q9I762|Q9I762_PSEAE Uncharacterized protein OS=Pseudomonas aeruginosa (strain ATCC 15692 / PAO1 / 1C / PRS 101 / LMG 12228) GN=PA0070 PE=4 SV=1	1	3	3

## Sheet: 2-3 proteinGroups C4HSL-1
Protein IDs	Majority protein IDs	Peptide counts (all)	Peptide counts (razor+unique)	Peptide counts (unique)	Fasta headers	Number of proteins	Peptides	Razor + unique peptides	Unique peptides	Sequence coverage [%]	Unique + razor sequence coverage [%]	Unique sequence coverage [%]	Mol. weight [kDa]	Sequence length	Sequence lengths	Q-value	Score	Intensity	MS/MS Count	Only identified by site	Reverse	Potential contaminant	id	Peptide IDs	Peptide is razor	Mod. peptide IDs	Evidence IDs	MS/MS IDs	Best MS/MS	Oxidation (M) site IDs	Oxidation (M) site positions
CON__P00761	CON__P00761	5	5	5	>P00761 SWISS-PROT:P00761|TRYP_PIG Trypsin - Sus scrofa (Pig).	1	5	5	5	25.1	25.1	25.1	24.409	231	231	0	118.43	1162600000	127			+	0	124;125;151;173;255	True;True;True;True;True	131;132;133;159;182;269	234;235;236;237;238;239;240;292;293;294;295;296;344;502;503	584;585;586;587;588;589;590;591;592;593;594;595;596;597;598;599;600;601;602;603;604;605;606;607;608;609;610;611;612;613;614;615;762;763;764;765;766;767;768;769;770;771;772;773;774;775;776;777;778;779;780;781;782;783;784;785;786;787;788;789;790;791;792;793;794;795;796;797;798;799;800;801;802;803;804;805;806;807;808;809;888;889;890;891;892;893;894;895;896;897;898;899;900;901;1324;1325;1326;1327;132…	590;614;784;891;1327	0	94
CON__P02533;CON__Q04695;CON__Q9QWL7;CON__Q6IFX2;CON__P19012;CON__P19001;CON__A2A4G1;CON__Q9Z2K1;CON__Q3ZAW8;CON__Q61782;CON__Q8N1A0;CON__P35900;CON__Q9D312	CON__P02533;CON__Q04695;CON__Q9QWL7;CON__Q6IFX2;CON__P19012	5;3;3;3;3;2;2;2;2;1;1;1;1	5;3;3;3;3;2;2;2;2;1;1;1;1	1;1;1;0;0;0;0;0;0;0;0;0;0	>P02533 SWISS-PROT:P02533 Tax_Id=9606 Gene_Symbol=KRT14 Keratin, type I cytoskeletal 14;>Q04695 SWISS-PROT:Q04695 Tax_Id=9606 Gene_Symbol=KRT17 Keratin, type I cytoskeletal 17;>Q9QWL7 SWISS-PROT:Q9QWL7 Tax_Id=10090 Gene_Symbol=Krt17 Keratin, type I cytoske	13	5	5	1	11.4	11.4	2.8	51.621	472	472;432;433;452;456;403;456;469;474;93;295;424;431	0	32.147	7696400	8			+	1	21;39;77;147;268	True;True;True;True;True	22;41;82;155;282	42;76;141;142;287;288;541;542	131;132;215;334;335;757;758;1400;1401	132;215;334;757;1401
CON__P04264;CON__Q6IFZ6;CON__Q9R0H5;CON__Q6NXH9;CON__Q8BGZ7;CON__P50446;CON__Q7Z794	CON__P04264	21;2;1;1;1;1;1	21;2;1;1;1;1;1	14;0;0;0;0;0;0	>P04264 SWISS-PROT:P04264 Tax_Id=9606 Gene_Symbol=KRT1 Keratin, type II cytoskeletal 1	7	21	21	14	35.6	35.6	24.4	66.017	644	644;572;524;539;551;553;578	0	243.31	144100000	91			+	2	10;63;67;83;93;119;143;164;192;193;196;207;219;222;223;226;243;245;247;248;289	True;True;True;True;True;True;True;True;True;True;True;True;True;True;True;True;True;True;True;True;True	10;67;71;72;88;98;125;151;173;202;203;206;207;219;232;235;236;239;257;259;261;262;304	21;22;115;116;121;122;123;124;150;165;224;225;280;333;334;390;391;395;396;397;418;419;440;443;444;445;450;484;486;487;489;490;491;492;587;588	89;90;91;92;285;286;287;293;294;295;296;297;298;299;300;301;302;345;346;347;348;349;350;379;549;550;551;739;740;741;872;873;874;875;876;877;1038;1039;1040;1041;1046;1047;1048;1049;1050;1051;1083;1084;1085;1086;1087;1088;1119;1122;1123;1124;1125;1126;1127;1128;1129;1130;1131;1132;1133;1138;1139;1140;1296;1298;1299;1300;1301;1302;1304;1305;1306;1307;1308;1309;1310;1311;1312;1313;1549;1550;1551;1552…	89;285;296;346;379;550;740;876;1038;1040;1047;1084;1119;1122;1124;1139;1296;1299;1309;1313;1553	1;2;3	259;262;469
CON__Q3KNV1;CON__P08729;CON__Q14CN4-1;CON__Q6IME9	CON__Q3KNV1;CON__P08729;CON__Q14CN4-1;CON__Q6IME9	1;1;1;1	1;1;1;1	1;1;1;1	>Q3KNV1 TREMBL:Q3KNV1;Q96GE1 Tax_Id=9606 Gene_Symbol=KRT7 keratin 7;>P08729 SWISS-PROT:P08729 Tax_Id=9606 Gene_Symbol=KRT7 Keratin, type II cytoskeletal 7;>Q14CN4-1 SWISS-PROT:Q14CN4-1 Tax_Id=9606 Gene_Symbol=KRT72 Isoform 1 of Keratin, type II cytoskeleta	4	1	1	1	2.3	2.3	2.3	51.385	469	469;469;511;520	0	6.7985	1017200	1			+	3	237	TRUE	251	471	1228	1228
[truncated: 61 more rows]

[truncated: 3 more sheets: 2-3 proteinGroups Probe 12, 2-3 Sheet1, 2-3 Sheet3]
