# Supplementary material for: Short-chain reactive probes as tools to unravel the Pseudomonas aeruginosa quorum sensing regulon
Source: Royal Society of Chemistry journal article supplement (doi:10.1039/d0sc04444j), 2021-01-01
Supplement: d0sc04444j2.zip [file Experiment 3.xlsx]

## Sheet: Key
Experiment 3	Chemical proteomics with Probe 12: Identification of proteins after incubation and photoaffinity labeling with Probe 12 in wild-type P. aeruginosa strain PAO1
Experimental methods	Yellow, Green and Blue sheets are independent biological replicates: Bacteria were grown, harvested, lysed, the lysates were incubated with C4HSL/Probe 12 in triplicates and labeled, downstream processed, streptavidin affinity enriched and trypticaly digested on the same day. StageTips desalting was done on the next day and LC-MS/MS analysis was performed later
Excel sheets content
3-1 proteinGroups C4HSL-1	Experiment 3 repeat 1 Raw data results of C4HSL control labeling
3-1 proteinGroups Probe 12	Experiment 3 repeat 1 Raw data results of Probe 12 labeling
3-1 Sheet1	Experiment 3 repeat 1: C4HSL results and unique Probe 12 results (C4HSL hits are subtracted)
3-1 Sheet2	Experiment 3 repeat 1: Filtered data of proteins for Probe 12 labeling which retain razor+unique peptides requirement of >1 for each replicate (filled with green)
For Green and Blue sheets-same as above only repeat experiment number changes (3-2, 3-3)

## Sheet: 3-1 proteinGroups C4HSL-1
Protein IDs	Majority protein IDs	Peptide counts (all)	Peptide counts (razor+unique)	Peptide counts (unique)	Fasta headers	Number of proteins	Peptides	Razor + unique peptides	Unique peptides	Sequence coverage [%]	Unique + razor sequence coverage [%]	Unique sequence coverage [%]	Mol. weight [kDa]	Sequence length	Sequence lengths	Q-value	Score	Intensity	MS/MS Count	Only identified by site	Reverse	Potential contaminant	id	Peptide IDs	Peptide is razor	Mod. peptide IDs	Evidence IDs	MS/MS IDs	Best MS/MS	Oxidation (M) site IDs	Oxidation (M) site positions
CON__P00761	CON__P00761	4	4	4	>P00761 SWISS-PROT:P00761|TRYP_PIG Trypsin - Sus scrofa (Pig).	1	4	4	4	25.1	25.1	25.1	24.409	231	231	0	20.842	505110000	24			+	0	789;970;1091;1629	True;True;True;True	800;982;1105;1648	1437;1779;1780;1781;1782;2008;2009;2982;2983	3031;3704;3705;3706;3707;3708;4126;4127;4128;4129;5942;5943;5944;5945;5946;5947;5948;5949;5950;5951;5952;5953;5954;5955	3031;3705;4126;5943
CON__P04264;CON__ENSEMBL:ENSBTAP00000038253;CON__P35908;CON__Q9R0H5;CON__Q6NXH9;CON__Q8BGZ7;CON__P50446;CON__Q6IFZ6;CON__Q7Z794;CON__Q922U2;CON__Q5XQN5	CON__P04264	5;2;2;1;1;1;1;1;1;1;1	5;2;2;1;1;1;1;1;1;1;1	5;2;2;1;1;1;1;1;1;1;1	>P04264 SWISS-PROT:P04264 Tax_Id=9606 Gene_Symbol=KRT1 Keratin, type II cytoskeletal 1	11	5	5	5	11.6	11.6	11.6	66.017	644	644;606;645;524;539;551;553;572;578;580;601	0	18.822	75533000	7			+	1	502;593;747;1435;1443	True;True;True;True;True	512;604;758;1453;1461	935;936;1097;1367;2634;2635;2649	2138;2139;2410;2921;5298;5299;5329	2138;2410;2921;5298;5329
CON__Streptavidin	CON__Streptavidin	4	4	4	>Streptavidin (S.avidinii)	1	4	4	4	43.1	43.1	43.1	16.622	160	160	0	102.68	5876000000	231			+	2	828;1226;1477;1868	True;True;True;True	840;1243;1495;1888	1503;1504;1505;1506;1507;1508;1509;1510;1511;2270;2271;2272;2273;2274;2275;2708;2709;2710;2711;3393;3394;3395;3396;3397;3398;3399;3400;3401;3402;3403	3141;3142;3143;3144;3145;3146;3147;3148;3149;3150;3151;3152;3153;3154;3155;3156;3157;3158;3159;3160;3161;3162;3163;3164;3165;3166;3167;3168;3169;3170;3171;3172;3173;3174;3175;3176;3177;3178;3179;3180;3181;3182;3183;3184;3185;3186;3187;3188;3189;3190;3191;3192;3193;3194;3195;3196;3197;3198;3199;4619;4620;4621;4622;4623;4624;4625;4626;4627;4628;4629;4630;4631;4632;4633;4634;4635;4636;4637;4638;4639…	3147;4637;5425;6715
REV__tr|Q9HWT4|Q9HWT4_PSEAE	REV__tr|Q9HWT4|Q9HWT4_PSEAE	1	1	1	>tr|Q9HWT4|Q9HWT4_PSEAE Probable transcriptional regulator OS=Pseudomonas aeruginosa (strain ATCC 15692 / PAO1 / 1C / PRS 101 / LMG 12228) GN=PA4094 PE=4 SV=1	1	1	1	1	0	0	0	35.912	319	319	0.0086705	0.81886	8007300	1		+		3	1081	TRUE	1095	1991	4099	4099
REV__tr|Q9HXW2|Q9HXW2_PSEAE	REV__tr|Q9HXW2|Q9HXW2_PSEAE	1	1	1	>tr|Q9HXW2|Q9HXW2_PSEAE Probable transcriptional regulator OS=Pseudomonas aeruginosa (strain ATCC 15692 / PAO1 / 1C / PRS 101 / LMG 12228) GN=PA3678 PE=4 SV=1	1	1	1	1	0	0	0	23.15	212	212	0.0058309	0.88354	212540000	9		+		4	897	TRUE	909	1640;1641;1642;1643	3426;3427;3428;3429;3430;3431;3432;3433;3434	3427
REV__tr|Q9I5B8|Q9I5B8_PSEAE	REV__tr|Q9I5B8|Q9I5B8_PSEAE	1	1	1	>tr|Q9I5B8|Q9I5B8_PSEAE Uncharacterized protein OS=Pseudomonas aeruginosa (strain ATCC 15692 / PAO1 / 1C / PRS 101 / LMG 12228) GN=PA0821 PE=4 SV=1	1	1	1	1	0	0	0	40.854	362	362	0.0030488	1.0945	10086000	1		+		5	118	TRUE	122	224	657	657
sp|G3XD12|HCNC_PSEAE	sp|G3XD12|HCNC_PSEAE	5	5	5	>sp|G3XD12|HCNC_PSEAE Hydrogen cyanide synthase subunit HcnC OS=Pseudomonas aeruginosa (strain ATCC 15692 / PAO1 / 1C / PRS 101 / LMG 12228) GN=hcnC PE=1 SV=1	1	5	5	5	19.4	19.4	19.4	45.281	417	417	0	30.001	105160000	16				6	581;1355;1534;1556;1918	True;True;True;True;True	592;1373;1552;1574;1938	1075;2491;2821;2822;2860;2861;2862;3478	2373;2374;5040;5675;5676;5677;5678;5728;5729;5730;5731;5732;5733;5734;5735;6887	2373;5040;5677;5729;6887
sp|G3XD23|WBPB_PSEAE	sp|G3XD23|WBPB_PSEAE	6	6	6	>sp|G3XD23|WBPB_PSEAE UDP-N-acetyl-2-amino-2-deoxy-D-glucuronate oxidase OS=Pseudomonas aeruginosa (strain ATCC 15692 / PAO1 / 1C / PRS 101 / LMG 12228) GN=wbpB PE=1 SV=1	1	6	6	6	24.4	24.4	24.4	35.717	316	316	0	22.318	356400000	25				7	10;694;1141;1245;1389;1841	True;True;True;True;True;True	11;705;1155;1262;1407;1861	18;19;1275;1276;2100;2101;2102;2306;2307;2552;2553;2554;2555;3352;3353	22;23;24;25;26;2757;2758;4296;4297;4298;4299;4300;4301;4302;4698;4699;4700;4701;4702;5141;5142;5143;5144;5145;6593;6594	23;2757;4301;4698;5145;6593
sp|G3XD61|WBPI_PSEAE	sp|G3XD61|WBPI_PSEAE	6	6	6	>sp|G3XD61|WBPI_PSEAE UDP-2,3-diacetamido-2,3-dideoxy-D-glucuronate 2-epimerase OS=Pseudomonas aeruginosa (strain ATCC 15692 / PAO1 / 1C / PRS 101 / LMG 12228) GN=wbpI PE=1 SV=1	1	6	6	6	26.3	26.3	26.3	38.907	354	354	0	51.233	218020000	19				8	222;813;873;1186;1545;1740	True;True;True;True;True;True	228;824;885;1201;1563;1759	413;414;1473;1474;1595;1596;1597;2183;2184;2840;2841;3173;3174	966;967;968;969;3090;3091;3353;3354;3355;3356;3357;4439;4440;5701;5702;5703;6253;6254;6255	968;3091;3353;4440;5702;6255
sp|G3XD76|DAPD_PSEAE	sp|G3XD76|DAPD_PSEAE	1	1	1	>sp|G3XD76|DAPD_PSEAE 2,3,4,5-tetrahydropyridine-2,6-dicarboxylate N-succinyltransferase OS=Pseudomonas aeruginosa (strain ATCC 15692 / PAO1 / 1C / PRS 101 / LMG 12228) GN=dapD PE=1 SV=1	1	1	1	1	3.5	3.5	3.5	35.973	344	344	0	1.1167	22277000	2				9	609	TRUE	620	1125;1126	2463;2464	2463
sp|G3XD94|UGND_PSEAE	sp|G3XD94|UGND_PSEAE	11	11	11	>sp|G3XD94|UGND_PSEAE UDP-N-acetyl-D-glucosamine 6-dehydrogenase OS=Pseudomonas aeruginosa (strain ATCC 15692 / PAO1 / 1C / PRS 101 / LMG 12228) GN=wbpA PE=1 SV=1	1	11	11	11	36.2	36.2	36.2	48.155	436	436	0	31.639	223750000	22				10	205;238;365;445;496;1032;1174;1679;1775;1905;1910	True;True;True;True;True;True;True;True;True;True;True	211;244;374;454;506;1044;1189;1698;1795;1925;1930	381;443;692;693;832;833;925;1901;1902;2160;3069;3070;3236;3237;3459;3467	916;1019;1685;1686;1947;1948;1949;2119;2120;3933;3934;4405;4406;6090;6091;6092;6093;6094;6409;6410;6862;6872	916;1019;1686;1949;2120;3933;4405;6090;6409;6862;6872
sp|O30508|ARUC_PSEAE	sp|O30508|ARUC_PSEAE	3	3	3	>sp|O30508|ARUC_PSEAE Succinylornithine transaminase/acetylornithine aminotransferase OS=Pseudomonas aeruginosa (strain ATCC 15692 / PAO1 / 1C / PRS 101 / LMG 12228) GN=aruC PE=1 SV=2	1	3	3	3	18.5	18.5	18.5	43.747	406	406	0	9.2642	12564000	2				11	472;710;1436	True;True;True	482;721;1454	883;1304;2636	2037;2805;5300	2037;2805;5300
sp|O52759|RS4_PSEAE	sp|O52759|RS4_PSEAE	7	7	7	>sp|O52759|RS4_PSEAE 30S ribosomal protein S4 OS=Pseudomonas aeruginosa (strain ATCC 15692 / PAO1 / 1C / PRS 101 / LMG 12228) GN=rpsD PE=3 SV=2	1	7	7	7	37.4	37.4	37.4	23.277	206	206	0	32.866	311810000	38				12	115;703;883;942;1084;1394;1653	True;True;True;True;True;True;True	119;714;895;954;1098;1412;1672	218;219;1291;1292;1613;1614;1726;1727;1996;1997;2562;2563;3020	648;649;650;651;2790;2791;2792;2793;3384;3385;3386;3590;3591;3592;4104;4105;4106;4107;4108;4109;5154;5155;5156;5157;5158;5159;5160;5161;5162;5163;5164;5165;5166;5167;5168;5169;5170;6003	648;2792;3385;3590;4108;5160;6003
sp|O52760|RPOA_PSEAE	sp|O52760|RPOA_PSEAE	10	10	10	>sp|O52760|RPOA_PSEAE DNA-directed RNA polymerase subunit alpha OS=Pseudomonas aeruginosa (strain ATCC 15692 / PAO1 / 1C / PRS 101 / LMG 12228) GN=rpoA PE=3 SV=2	1	10	10	10	40.5	40.5	40.5	36.649	333	333	0	28.254	287050000	27				13	24;62;564;707;855;1076;1120;1209;1523;1794	True;True;True;True;True;True;True;True;True;True	25;65;575;718;867;1090;1134;1224;1541;1814	42;121;122;1045;1297;1298;1554;1555;1983;1984;2067;2224;2225;2226;2227;2795;2796;3266	75;76;333;334;335;336;337;2334;2335;2798;2799;3277;3278;3279;3280;3281;4091;4092;4242;4509;4510;4511;4512;4513;5596;5597;6453	75;335;2335;2798;3280;4091;4242;4510;5597;6453
sp|O52762|CATA_PSEAE	sp|O52762|CATA_PSEAE	11	11	11	>sp|O52762|CATA_PSEAE Catalase OS=Pseudomonas aeruginosa (strain ATCC 15692 / PAO1 / 1C / PRS 101 / LMG 12228) GN=katA PE=1 SV=1	1	11	11	11	32.8	32.8	32.8	55.588	482	482	0	44.063	278490000	26				14	338;530;650;913;958;1105;1277;1335;1584;1632;1906	True;True;True;True;True;True;True;True;True;True;True	347;541;661;925;970;1119;1294;1353;1602;1651;1926	646;647;990;1200;1201;1673;1752;1753;2030;2031;2355;2356;2460;2461;2904;2905;2986;3460	1600;1601;2245;2605;2606;2607;2608;2609;2610;3476;3629;3630;3631;3632;3633;4166;4167;4780;4781;4782;4991;4992;5802;5803;5959;5960;6863	1600;2245;2605;3476;3630;4166;4782;4992;5803;5959;6863
sp|O54439|ACP1_PSEAE	sp|O54439|ACP1_PSEAE	2	2	2	>sp|O54439|ACP1_PSEAE Acyl carrier protein 1 OS=Pseudomonas aeruginosa (strain ATCC 15692 / PAO1 / 1C / PRS 101 / LMG 12228) GN=acpP1 PE=3 SV=4	1	2	2	2	32.1	32.1	32.1	8.7406	78	78	0	15.292	187920000	14				15	858;861	True;True	870;873	1559;1560;1561;1562;1568;1569	3286;3287;3288;3289;3290;3291;3292;3293;3294;3295;3296;3297;3305;3306	3292;3305
sp|O68822|AMPA_PSEAE	sp|O68822|AMPA_PSEAE	13	13	13	>sp|O68822|AMPA_PSEAE Cytosol aminopeptidase OS=Pseudomonas aeruginosa (strain ATCC 15692 / PAO1 / 1C / PRS 101 / LMG 12228) GN=pepA PE=3 SV=1	1	13	13	13	39	39	39	52.331	495	495	0	52.245	852710000	70				16	226;245;359;411;616;622;924;1011;1031;1306;1510;1650;1678	True;True;True;True;True;True;True;True;True;True;True;True;True	232;252;368;420;627;633;936;1023;1043;1324;1528;1669;1697	419;420;456;457;458;680;681;772;773;774;775;1140;1141;1152;1153;1154;1696;1697;1861;1862;1899;1900;2409;2410;2769;3016;3067;3068	975;976;977;978;979;980;981;1040;1041;1042;1043;1044;1045;1046;1047;1048;1049;1050;1661;1662;1663;1664;1665;1666;1667;1833;1834;1835;1836;1837;1838;1839;1840;2504;2505;2529;2530;2531;2532;2533;2534;2535;2536;2537;2538;3533;3534;3535;3536;3537;3862;3863;3864;3865;3866;3867;3927;3928;3929;3930;3931;3932;4904;4905;4906;4907;4908;4909;4910;5542;5996;6087;6088;6089	979;1045;1666;1835;2505;2537;3533;3865;3929;4904;5542;5996;6089
sp|O69754|PHZF_PSEAE	sp|O69754|PHZF_PSEAE	4	4	4	>sp|O69754|PHZF_PSEAE Trans-2,3-dihydro-3-hydroxyanthranilate isomerase OS=Pseudomonas aeruginosa (strain ATCC 15692 / PAO1 / 1C / PRS 101 / LMG 12228) GN=phzF1 PE=3 SV=2	1	4	4	4	28.1	28.1	28.1	30.342	278	278	0	8.4681	140160000	11				17	762;1164;1171;1297	True;True;True;True	773;1179;1186;1315	1392;1393;2141;2142;2154;2155;2393;2394	2972;2973;2974;4376;4377;4378;4397;4398;4872;4873;4874	2973;4377;4397;4872
sp|O82850|RS2_PSEAE	sp|O82850|RS2_PSEAE	7	7	7	>sp|O82850|RS2_PSEAE 30S ribosomal protein S2 OS=Pseudomonas aeruginosa (strain ATCC 15692 / PAO1 / 1C / PRS 101 / LMG 12228) GN=rpsB PE=3 SV=2	1	7	7	7	38.6	38.6	38.6	27.336	246	246	0	28.819	293880000	27				18	290;308;782;980;1082;1560;1849	True;True;True;True;True;True;True	297;317;793;992;1096;1578;1869	541;542;591;1425;1426;1803;1804;1992;1993;2867;2868;3365;3366	1239;1240;1241;1242;1509;3015;3016;3755;3756;3757;3758;4100;4101;5740;5741;5742;5743;5744;5745;5746;5747;5748;6606;6607;6608;6609;6610;6611	1241;1509;3016;3755;4101;5741;6607
sp|O86428|ILVE_PSEAE	sp|O86428|ILVE_PSEAE	2	2	2	>sp|O86428|ILVE_PSEAE Branched-chain-amino-acid aminotransferase OS=Pseudomonas aeruginosa (strain ATCC 15692 / PAO1 / 1C / PRS 101 / LMG 12228) GN=ilvE PE=1 SV=2	1	2	2	2	6.8	6.8	6.8	34.084	307	307	0	3.2766	37051000	4				19	249;252	True;True	256;259	464;465;469	1058;1059;1060;1067	1058;1067
sp|O87125|CHEB1_PSEAE	sp|O87125|CHEB1_PSEAE	2	2	2	>sp|O87125|CHEB1_PSEAE Chemotaxis response regulator protein-glutamate methylesterase of group 1 operon OS=Pseudomonas aeruginosa (strain ATCC 15692 / PAO1 / 1C / PRS 101 / LMG 12228) GN=cheB1 PE=1 SV=2	1	2	2	2	11.4	11.4	11.4	39.004	368	368	0	2.8551	11684000	5				20	1662;1737	True;True	1681;1756	3035;3036;3169	6024;6025;6026;6027;6248	6024;6248
sp|O87131|CHER1_PSEAE	sp|O87131|CHER1_PSEAE	1	1	1	>sp|O87131|CHER1_PSEAE Chemotaxis protein methyltransferase 1 OS=Pseudomonas aeruginosa (strain ATCC 15692 / PAO1 / 1C / PRS 101 / LMG 12228) GN=cheR1 PE=3 SV=1	1	1	1	1	2.9	2.9	2.9	30.647	274	274	0.008427	0.62985	0	1				21	1079	TRUE	1093	1989	4097	4097
sp|P04739|FMPO_PSEAE	sp|P04739|FMPO_PSEAE	3	3	3	>sp|P04739|FMPO_PSEAE Fimbrial protein OS=Pseudomonas aeruginosa (strain ATCC 15692 / PAO1 / 1C / PRS 101 / LMG 12228) GN=pilA PE=1 SV=1	1	3	3	3	22.1	22.1	22.1	15.512	149	149	0	5.4201	88216000	6				22	1399;1478;1598	True;True;True	1417;1496;1617	2572;2573;2712;2713;2933	5187;5188;5189;5439;5440;5858	5189;5440;5858
sp|P05384|DBHB_PSEAE	sp|P05384|DBHB_PSEAE	1	1	1	>sp|P05384|DBHB_PSEAE DNA-binding protein HU-beta OS=Pseudomonas aeruginosa (strain ATCC 15692 / PAO1 / 1C / PRS 101 / LMG 12228) GN=hupB PE=1 SV=3	1	1	1	1	15.6	15.6	15.6	9.0865	90	90	0	1.3069	30307000	2				23	126	TRUE	130	237;238	678;679	678
sp|P08280|RECA_PSEAE	sp|P08280|RECA_PSEAE	2	2	2	>sp|P08280|RECA_PSEAE Protein RecA OS=Pseudomonas aeruginosa (strain ATCC 15692 / PAO1 / 1C / PRS 101 / LMG 12228) GN=recA PE=3 SV=1	1	2	2	2	9.2	9.2	9.2	36.879	346	346	0	9.0862	21005000	5				24	1449;1896	True;True	1467;1916	2659;2660;2661;3445	5349;5350;5351;5352;6838	5349;6838
sp|P08308|OTCC_PSEAE	sp|P08308|OTCC_PSEAE	15	15	15	>sp|P08308|OTCC_PSEAE Ornithine carbamoyltransferase, catabolic OS=Pseudomonas aeruginosa (strain ATCC 15692 / PAO1 / 1C / PRS 101 / LMG 12228) GN=arcB PE=1 SV=3	1	15	15	15	49.7	49.7	49.7	38.108	336	336	0	30.148	1265400000	80				25	113;413;470;585;792;1100;1101;1220;1253;1259;1273;1320;1331;1899;1913	True;True;True;True;True;True;True;True;True;True;True;True;True;True;True	117;422;479;480;596;803;1114;1115;1237;1270;1276;1290;1338;1349;1919;1933	213;214;215;778;779;877;878;879;880;1082;1444;2022;2023;2024;2259;2260;2320;2321;2328;2349;2350;2435;2436;2451;2452;2453;3449;3450;3451;3471;3472	643;644;645;1846;1847;1848;1849;1850;1851;1852;1853;1854;1855;1856;1857;1858;2014;2015;2016;2017;2018;2019;2020;2021;2022;2023;2024;2025;2026;2027;2028;2029;2030;2031;2032;2033;2034;2385;3040;4158;4159;4160;4602;4603;4604;4605;4722;4723;4724;4725;4734;4769;4770;4771;4772;4773;4774;4949;4950;4970;4971;4972;4973;4974;4975;4976;4977;4978;6842;6843;6844;6845;6846;6847;6848;6849;6850;6851;6876;6877;68…	643;1852;2033;2385;3040;4159;4160;4603;4725;4734;4773;4949;4972;6848;6879	0;1	139;146
sp|P09591|EFTU_PSEAE	sp|P09591|EFTU_PSEAE	20	20	20	>sp|P09591|EFTU_PSEAE Elongation factor Tu OS=Pseudomonas aeruginosa (strain ATCC 15692 / PAO1 / 1C / PRS 101 / LMG 12228) GN=tufA PE=1 SV=2	1	20	20	20	64	64	64	43.369	397	397	0	164.8	9830400000	672				26	43;74;80;107;263;296;297;390;617;699;893;1114;1218;1364;1593;1594;1595;1602;1631;1774	True;True;True;True;True;True;True;True;True;True;True;True;True;True;True;True;True;True;True;True	44;45;46;77;83;110;111;270;303;304;305;306;399;628;710;905;1128;1234;1235;1382;1612;1613;1614;1621;1650;1794	75;76;77;78;79;80;81;82;83;84;85;86;87;88;89;90;91;92;93;94;142;143;153;154;198;199;200;201;202;203;204;205;492;493;554;555;556;557;558;559;560;561;562;563;564;565;566;567;568;569;570;571;572;736;737;1142;1143;1144;1145;1283;1284;1285;1286;1631;2045;2046;2047;2048;2049;2050;2051;2052;2053;2054;2055;2245;2246;2247;2248;2249;2250;2251;2252;2253;2254;2504;2505;2925;2926;2927;2928;2929;2939;2940;2985…	151;152;153;154;155;156;157;158;159;160;161;162;163;164;165;166;167;168;169;170;171;172;173;174;175;176;177;178;179;180;181;182;183;184;185;186;187;188;189;190;191;192;193;194;195;196;197;198;199;200;201;202;203;204;205;206;207;208;209;210;211;212;213;214;215;216;217;218;219;220;221;222;223;224;225;226;227;228;229;230;231;232;233;234;235;236;237;238;239;240;241;242;243;244;245;246;247;248;249;250…	266;395;414;587;1147;1310;1455;1767;2507;2778;3417;4192;4577;5057;5841;5843;5845;5865;5958;6400	2;3;4;5;6;7	140;152;177;216;362;372
sp|P11221|OPRI_PSEAE	sp|P11221|OPRI_PSEAE	4	4	4	>sp|P11221|OPRI_PSEAE Major outer membrane lipoprotein OS=Pseudomonas aeruginosa (strain ATCC 15692 / PAO1 / 1C / PRS 101 / LMG 12228) GN=oprI PE=3 SV=1	1	4	4	4	38.6	38.6	38.6	8.8348	83	83	0	12.524	217660000	38				27	34;196;885;1097	True;True;True;True	35;201;897;1111	55;56;362;363;364;1616;1617;1618;2017;2018	94;95;96;887;888;889;890;891;892;893;894;895;3388;3389;3390;3391;3392;3393;3394;3395;3396;3397;3398;4140;4141;4142;4143;4144;4145;4146;4147;4148;4149;4150;4151;4152;4153;4154	95;893;3389;4141
sp|P11436|AMIE_PSEAE	sp|P11436|AMIE_PSEAE	2	2	2	>sp|P11436|AMIE_PSEAE Aliphatic amidase OS=Pseudomonas aeruginosa (strain ATCC 15692 / PAO1 / 1C / PRS 101 / LMG 12228) GN=amiE PE=1 SV=2	1	2	2	2	6.1	6.1	6.1	38.494	346	346	0	2.3472	15835000	3				28	700;1073	True;True	711;1087	1287;1288;1980	2786;2787;4087	2786;4087
sp|P13794|PORF_PSEAE	sp|P13794|PORF_PSEAE	5	5	5	>sp|P13794|PORF_PSEAE Outer membrane porin F OS=Pseudomonas aeruginosa (strain ATCC 15692 / PAO1 / 1C / PRS 101 / LMG 12228) GN=oprF PE=1 SV=1	1	5	5	5	19.7	19.7	19.7	37.639	350	350	0	16.067	42636000	10				29	336;1371;1380;1639;1746	True;True;True;True;True	345;1389;1398;1658;1765	643;2516;2535;2536;3000;3001;3183	1595;5087;5115;5116;5117;5118;5977;5978;5979;6266	1595;5087;5115;5977;6266
sp|P13981|ARCA_PSEAE	sp|P13981|ARCA_PSEAE	22	22	22	>sp|P13981|ARCA_PSEAE Arginine deiminase OS=Pseudomonas aeruginosa (strain ATCC 15692 / PAO1 / 1C / PRS 101 / LMG 12228) GN=arcA PE=1 SV=2	1	22	22	22	55	55	55	46.435	418	418	0	148.81	5637700000	264				30	97;275;305;399;442;463;611;851;887;889;891;908;1289;1309;1321;1379;1493;1526;1527;1702;1744;1811	True;True;True;True;True;True;True;True;True;True;True;True;True;True;True;True;True;True;True;True;True;True	100;282;314;408;451;472;622;863;899;901;903;920;1307;1327;1339;1397;1511;1544;1545;1721;1763;1831	177;178;179;180;516;517;585;586;750;751;827;864;865;866;867;1129;1130;1131;1132;1133;1134;1546;1547;1548;1549;1620;1622;1623;1625;1626;1627;1660;1661;1662;1663;1664;1665;1666;2382;2383;2414;2415;2437;2438;2531;2532;2533;2534;2739;2740;2801;2802;2803;2804;2805;2806;2807;2808;2809;2810;2811;2812;3111;3180;3298;3299;3300	470;471;472;473;474;475;476;477;478;479;1201;1202;1203;1204;1205;1206;1207;1208;1209;1210;1486;1487;1488;1489;1490;1491;1492;1493;1494;1495;1496;1497;1498;1499;1786;1787;1788;1789;1942;1986;1987;1988;1989;1990;1991;1992;1993;1994;1995;1996;1997;1998;1999;2000;2467;2468;2469;2470;2471;2472;2473;2474;2475;2476;2477;2478;2479;2480;2481;2482;2483;2484;2485;2486;2487;2488;2489;2490;2491;2492;2493;2494…	476;1202;1494;1788;1942;1991;2491;3250;3400;3402;3409;3463;4848;4915;4951;5110;5482;5607;5658;6157;6263;6515
sp|P13982|ARCC_PSEAE	sp|P13982|ARCC_PSEAE	5	5	5	>sp|P13982|ARCC_PSEAE Carbamate kinase OS=Pseudomonas aeruginosa (strain ATCC 15692 / PAO1 / 1C / PRS 101 / LMG 12228) GN=arcC PE=3 SV=1	1	5	5	5	26.1	26.1	26.1	33.08	310	310	0	15.626	133000000	8				31	104;259;877;973;1626	True;True;True;True;True	107;266;889;985;1645	191;192;480;481;482;1602;1786;1787;2978	497;498;1090;1091;1092;3366;3712;3713;5936	497;1091;3366;3712;5936
sp|P14165|CISY_PSEAE	sp|P14165|CISY_PSEAE	8	8	8	>sp|P14165|CISY_PSEAE Citrate synthase OS=Pseudomonas aeruginosa (strain ATCC 15692 / PAO1 / 1C / PRS 101 / LMG 12228) GN=gltA PE=3 SV=2	1	8	8	8	28.5	28.5	28.5	47.694	428	428	0	18.968	196720000	17				32	193;575;698;912;1177;1178;1205;1268	True;True;True;True;True;True;True;True	197;586;709;924;1192;1193;1220;1285	353;354;1065;1282;1672;2165;2166;2167;2168;2169;2215;2216;2342	872;873;2360;2766;2767;3474;3475;4413;4414;4415;4416;4417;4494;4495;4496;4497;4762	872;2360;2767;3475;4413;4416;4494;4762
sp|P15276|ALGP_PSEAE	sp|P15276|ALGP_PSEAE	1	1	1	>sp|P15276|ALGP_PSEAE Transcriptional regulatory protein AlgP OS=Pseudomonas aeruginosa (strain ATCC 15692 / PAO1 / 1C / PRS 101 / LMG 12228) GN=algP PE=4 SV=2	1	1	1	1	4	4	4	34.49	352	352	0	7.2399	13435000	1				33	447	TRUE	456	835	1951	1951
sp|P20580|TRPE_PSEAE	sp|P20580|TRPE_PSEAE	1	1	1	>sp|P20580|TRPE_PSEAE Anthranilate synthase component 1 OS=Pseudomonas aeruginosa (strain ATCC 15692 / PAO1 / 1C / PRS 101 / LMG 12228) GN=trpE PE=1 SV=1	1	1	1	1	4.1	4.1	4.1	54.555	492	492	0	1.3334	1519900	1				34	838	TRUE	850	1526	3220	3220
sp|P20582|PQSD_PSEAE	sp|P20582|PQSD_PSEAE	4	4	4	>sp|P20582|PQSD_PSEAE 2-heptyl-4(1H)-quinolone synthase PqsD OS=Pseudomonas aeruginosa (strain ATCC 15692 / PAO1 / 1C / PRS 101 / LMG 12228) GN=pqsD PE=1 SV=2	1	4	4	4	15.4	15.4	15.4	36.378	337	337	0	10.345	70130000	5				35	381;646;829;1886	True;True;True;True	390;657;841;1906	721;1193;1194;1512;3429	1731;2595;2596;2597;3200;6811	1731;2596;3200;6811
sp|P22008|P5CR_PSEAE	sp|P22008|P5CR_PSEAE	2	2	2	>sp|P22008|P5CR_PSEAE Pyrroline-5-carboxylate reductase OS=Pseudomonas aeruginosa (strain ATCC 15692 / PAO1 / 1C / PRS 101 / LMG 12228) GN=proC PE=1 SV=2	1	2	2	2	12.5	12.5	12.5	28.094	273	273	0.0057803	0.82105	2815100	3				36	1409;1799	True;True	1427;1819	2588;3278	5220;5221;6475	5220;6475
sp|P22608|PILB_PSEAE	sp|P22608|PILB_PSEAE	1	1	1	>sp|P22608|PILB_PSEAE Type 4 fimbrial assembly protein PilB OS=Pseudomonas aeruginosa (strain ATCC 15692 / PAO1 / 1C / PRS 101 / LMG 12228) GN=pilB PE=3 SV=2	1	1	1	1	1.9	1.9	1.9	62.327	566	566	0	1.516	517000	4				37	1512	TRUE	1530	2773;2774	5547;5548;5549;5550	5548
sp|P26276|ALGC_PSEAE	sp|P26276|ALGC_PSEAE	1	1	1	>sp|P26276|ALGC_PSEAE Phosphomannomutase/phosphoglucomutase OS=Pseudomonas aeruginosa (strain ATCC 15692 / PAO1 / 1C / PRS 101 / LMG 12228) GN=algC PE=1 SV=4	1	1	1	1	3.2	3.2	3.2	50.295	463	463	0	2.5876	5535500	1				38	1683	TRUE	1702	3077	6116	6116
sp|P26480|RPOD_PSEAE	sp|P26480|RPOD_PSEAE	5	5	5	>sp|P26480|RPOD_PSEAE RNA polymerase sigma factor RpoD OS=Pseudomonas aeruginosa (strain ATCC 15692 / PAO1 / 1C / PRS 101 / LMG 12228) GN=rpoD PE=3 SV=1	1	5	5	5	12.3	12.3	12.3	69.643	617	617	0	23.25	54439000	9				39	423;458;531;633;1315	True;True;True;True;True	432;467;542;644;1333	797;856;857;991;1174;2426;2427	1888;1976;1977;1978;2246;2571;2572;4937;4938	1888;1978;2246;2572;4938
sp|P27726|G3P_PSEAE	sp|P27726|G3P_PSEAE	2	2	2	>sp|P27726|G3P_PSEAE Glyceraldehyde-3-phosphate dehydrogenase OS=Pseudomonas aeruginosa (strain ATCC 15692 / PAO1 / 1C / PRS 101 / LMG 12228) GN=gap PE=3 SV=3	1	2	2	2	9.9	9.9	9.9	36.17	334	334	0	3.2	19075000	2				40	331;1530	True;True	340;1548	635;2816;2817	1582;5670;5671	1582;5670
sp|P28810|MMSA_PSEAE	sp|P28810|MMSA_PSEAE	1	1	1	>sp|P28810|MMSA_PSEAE Methylmalonate-semialdehyde dehydrogenase [acylating] OS=Pseudomonas aeruginosa (strain ATCC 15692 / PAO1 / 1C / PRS 101 / LMG 12228) GN=mmsA PE=1 SV=2	1	1	1	1	3.6	3.6	3.6	53.663	497	497	0.0029326	0.92221	4037900	0				41	200	TRUE	205	370	902	902
sp|P29363|THRC_PSEAE	sp|P29363|THRC_PSEAE	3	3	3	>sp|P29363|THRC_PSEAE Threonine synthase OS=Pseudomonas aeruginosa (strain ATCC 15692 / PAO1 / 1C / PRS 101 / LMG 12228) GN=thrC PE=3 SV=3	1	3	3	3	12.6	12.6	12.6	51.795	469	469	0	1.9934	16770000	4				42	84;225;652	True;True;True	87;231;663	160;418;1204	442;974;2614;2615;2616	442;974;2616
sp|P29365|DHOM_PSEAE	sp|P29365|DHOM_PSEAE	4	4	4	>sp|P29365|DHOM_PSEAE Homoserine dehydrogenase OS=Pseudomonas aeruginosa (strain ATCC 15692 / PAO1 / 1C / PRS 101 / LMG 12228) GN=hom PE=3 SV=2	1	4	4	4	18.9	18.9	18.9	46.223	434	434	0	13.499	44030000	5				43	277;822;1103;1528	True;True;True;True	284;834;1117;1546	520;1491;2027;2813	1214;3119;4163;5665;5666	1214;3119;4163;5665
sp|P30718|CH60_PSEAE	sp|P30718|CH60_PSEAE	18	18	18	>sp|P30718|CH60_PSEAE 60 kDa chaperonin OS=Pseudomonas aeruginosa (strain ATCC 15692 / PAO1 / 1C / PRS 101 / LMG 12228) GN=groL PE=1 SV=3	1	18	18	18	53.9	53.9	53.9	57.085	547	547	0	64.286	837730000	69				44	27;105;154;166;169;224;287;424;562;697;910;1194;1329;1333;1340;1406;1640;1660	True;True;True;True;True;True;True;True;True;True;True;True;True;True;True;True;True;True	28;108;158;170;173;230;294;433;573;708;922;1209;1347;1351;1358;1424;1659;1679	45;46;193;194;195;281;282;300;301;306;307;308;309;416;417;536;537;798;799;1042;1043;1281;1669;2195;2196;2448;2449;2455;2456;2468;2469;2582;2583;3002;3031;3032	79;80;81;82;499;500;501;502;503;504;505;506;752;753;783;784;785;793;794;795;796;797;798;799;800;801;802;803;804;971;972;973;1233;1234;1889;1890;1891;1892;1893;1894;1895;2331;2332;2765;3471;4454;4455;4456;4457;4458;4459;4966;4967;4968;4980;4981;5000;5001;5002;5003;5206;5207;5208;5209;5980;6015;6016;6017;6018	81;502;753;785;794;973;1233;1890;2332;2765;3471;4454;4967;4980;5001;5207;5980;6018
sp|P34002|AROB_PSEAE	sp|P34002|AROB_PSEAE	3	3	3	>sp|P34002|AROB_PSEAE 3-dehydroquinate synthase OS=Pseudomonas aeruginosa (strain ATCC 15692 / PAO1 / 1C / PRS 101 / LMG 12228) GN=aroB PE=3 SV=2	1	3	3	3	16	16	16	40.109	368	368	0	10.793	39294000	4				45	679;1122;1630	True;True;True	690;1136;1649	1246;1247;2070;2984	2683;2684;4245;5956;5957	2683;4245;5956
sp|P37798|ACCC_PSEAE	sp|P37798|ACCC_PSEAE	8	8	8	>sp|P37798|ACCC_PSEAE Biotin carboxylase OS=Pseudomonas aeruginosa (strain ATCC 15692 / PAO1 / 1C / PRS 101 / LMG 12228) GN=accC PE=1 SV=1	1	8	8	8	26.1	26.1	26.1	48.887	449	449	0	44.658	470730000	31				46	98;548;1227;1416;1517;1692;1701;1828	True;True;True;True;True;True;True;True	101;559;1244;1434;1535;1711;1720;1848	181;182;183;1018;2276;2277;2600;2601;2782;2783;3090;3091;3107;3108;3109;3110;3328;3329	480;481;482;483;484;2290;4654;4655;4656;4657;4658;4659;5247;5248;5249;5250;5251;5576;5577;5578;6130;6131;6132;6133;6152;6153;6154;6155;6554;6555;6556	483;2290;4658;5249;5576;6130;6155;6556
sp|P37799|BCCP_PSEAE	sp|P37799|BCCP_PSEAE	5	5	5	>sp|P37799|BCCP_PSEAE Biotin carboxyl carrier protein of acetyl-CoA carboxylase OS=Pseudomonas aeruginosa (strain ATCC 15692 / PAO1 / 1C / PRS 101 / LMG 12228) GN=accB PE=3 SV=1	1	5	5	5	57.1	57.1	57.1	16.455	156	156	0	33.218	1202800000	61				47	23;1000;1044;1460;1501	True;True;True;True;True	24;1012;1057;1478;1519	40;41;1837;1838;1839;1840;1841;1842;1843;1926;2678;2679;2751;2752;2753;2754;2755	63;64;65;66;67;68;69;70;71;72;73;74;3804;3805;3806;3807;3808;3809;3810;3811;3812;3813;3814;3815;3816;3817;3818;3819;3820;3821;3822;3823;3824;3825;3826;3827;3828;3829;3830;3831;3832;3833;3834;3835;3836;3979;5376;5377;5378;5379;5380;5510;5511;5512;5513;5514;5515;5516;5517;5518;5519	70;3820;3979;5376;5517
sp|P38100|CARB_PSEAE	sp|P38100|CARB_PSEAE	16	16	16	>sp|P38100|CARB_PSEAE Carbamoyl-phosphate synthase large chain OS=Pseudomonas aeruginosa (strain ATCC 15692 / PAO1 / 1C / PRS 101 / LMG 12228) GN=carB PE=3 SV=3	1	16	16	16	24.1	24.1	24.1	117.33	1073	1073	0	60.185	365900000	43				48	362;493;624;625;676;819;929;940;1138;1358;1474;1547;1553;1574;1691;1695	True;True;True;True;True;True;True;True;True;True;True;True;True;True;True;True	371;503;635;636;687;831;941;952;1152;1376;1492;1565;1571;1592;1710;1714	686;687;688;921;1157;1158;1159;1160;1241;1242;1485;1486;1704;1705;1724;2095;2096;2495;2701;2702;2844;2845;2854;2855;2888;2889;3088;3089;3096;3097	1674;1675;1676;1677;1678;1679;1680;2115;2544;2545;2546;2547;2548;2549;2678;2679;3110;3111;3112;3113;3556;3557;3558;3559;3588;4283;4284;4285;4286;5047;5411;5412;5707;5708;5709;5721;5722;5774;5775;5776;5777;6128;6129;6139;6140	1679;2115;2546;2548;2679;3112;3557;3588;4284;5047;5412;5707;5721;5774;6128;6140
sp|P43336|PHHC_PSEAE	sp|P43336|PHHC_PSEAE	7	7	7	>sp|P43336|PHHC_PSEAE Aromatic-amino-acid aminotransferase OS=Pseudomonas aeruginosa (strain ATCC 15692 / PAO1 / 1C / PRS 101 / LMG 12228) GN=phhC PE=3 SV=2	1	7	7	7	23.8	23.8	23.8	43.273	399	399	0	14.03	142660000	15				49	31;637;772;906;946;1763;1789	True;True;True;True;True;True;True	32;648;783;918;958;1783;1809	51;52;1180;1411;1656;1657;1732;1733;3215;3216;3259	88;89;90;91;2579;3001;3450;3451;3600;3601;6355;6356;6357;6358;6443;6444	88;2579;3001;3451;3601;6355;6444
sp|P47203|FTSA_PSEAE	sp|P47203|FTSA_PSEAE	6	6	6	>sp|P47203|FTSA_PSEAE Cell division protein FtsA OS=Pseudomonas aeruginosa (strain ATCC 15692 / PAO1 / 1C / PRS 101 / LMG 12228) GN=ftsA PE=3 SV=2	1	6	6	6	20.1	20.1	20.1	44.646	417	417	0	19.537	82830000	10				50	1158;1310;1424;1577;1712;1865	True;True;True;True;True;True	1173;1328;1442;1595;1731;1885	2130;2416;2615;2893;2894;3128;3129;3389	4360;4361;4925;5267;5268;5784;5785;6194;6195;6645	4360;4925;5267;5785;6195;6645
sp|P47204|FTSZ_PSEAE	sp|P47204|FTSZ_PSEAE	6	6	6	>sp|P47204|FTSZ_PSEAE Cell division protein FtsZ OS=Pseudomonas aeruginosa (strain ATCC 15692 / PAO1 / 1C / PRS 101 / LMG 12228) GN=ftsZ PE=1 SV=2	1	6	6	6	22.8	22.8	22.8	41.218	394	394	0	20.695	76513000	12				51	258;627;1050;1161;1694;1808	True;True;True;True;True;True	265;638;1063;1176;1713;1828	479;1162;1163;1937;2135;2136;3094;3095;3293;3294	1089;2551;2552;3991;3992;3993;3994;4368;4369;6137;6138;6499;6500;6501;6502	1089;2552;3992;4369;6137;6499
sp|P48247|GSA_PSEAE	sp|P48247|GSA_PSEAE	6	6	6	>sp|P48247|GSA_PSEAE Glutamate-1-semialdehyde 2,1-aminomutase OS=Pseudomonas aeruginosa (strain ATCC 15692 / PAO1 / 1C / PRS 101 / LMG 12228) GN=hemL PE=1 SV=2	1	6	6	6	20.8	20.8	20.8	45.397	427	427	0	28.465	134640000	10				52	95;783;1179;1217;1485;1622	True;True;True;True;True;True	98;794;1194;1233;1503;1641	173;174;1427;2170;2243;2244;2724;2970;2971	464;465;3017;4418;4536;4537;5461;5462;5916;5917	464;3017;4418;4536;5461;5916
sp|P48372|GYRA_PSEAE	sp|P48372|GYRA_PSEAE	2	2	2	>sp|P48372|GYRA_PSEAE DNA gyrase subunit A OS=Pseudomonas aeruginosa (strain ATCC 15692 / PAO1 / 1C / PRS 101 / LMG 12228) GN=gyrA PE=3 SV=1	1	2	2	2	2.5	2.5	2.5	101.13	923	923	0	7.4398	19481000	3				53	86;1923	True;True	89;1943	162;3485;3486	444;6895;6896	444;6895
sp|P50597|RNPH_PSEAE	sp|P50597|RNPH_PSEAE	1	1	1	>sp|P50597|RNPH_PSEAE Ribonuclease PH OS=Pseudomonas aeruginosa (strain ATCC 15692 / PAO1 / 1C / PRS 101 / LMG 12228) GN=rph PE=1 SV=2	1	1	1	1	7.9	7.9	7.9	25.654	239	239	0	5.8627	8301700	3				54	1509	TRUE	1527	2767;2768	5539;5540;5541	5539
sp|P50987|ARLY_PSEAE	sp|P50987|ARLY_PSEAE	1	1	1	>sp|P50987|ARLY_PSEAE Argininosuccinate lyase OS=Pseudomonas aeruginosa (strain ATCC 15692 / PAO1 / 1C / PRS 101 / LMG 12228) GN=argH PE=3 SV=2	1	1	1	1	2.8	2.8	2.8	51.64	464	464	0	3.0565	9681400	3				55	1659	TRUE	1678	3029;3030	6012;6013;6014	6013
sp|P52002|MEXB_PSEAE	sp|P52002|MEXB_PSEAE	1	1	1	>sp|P52002|MEXB_PSEAE Multidrug resistance protein MexB OS=Pseudomonas aeruginosa (strain ATCC 15692 / PAO1 / 1C / PRS 101 / LMG 12228) GN=mexB PE=1 SV=2	1	1	1	1	1.3	1.3	1.3	112.79	1046	1046	0.0086207	0.74551	5356600	1				56	1075	TRUE	1089	1982	4090	4090
sp|P53593|SUCC_PSEAE	sp|P53593|SUCC_PSEAE	14	14	14	>sp|P53593|SUCC_PSEAE Succinyl-CoA ligase [ADP-forming] subunit beta OS=Pseudomonas aeruginosa (strain ATCC 15692 / PAO1 / 1C / PRS 101 / LMG 12228) GN=sucC PE=3 SV=2	1	14	14	14	46.4	46.4	46.4	41.542	388	388	0	94.041	1418900000	104				57	71;216;234;403;767;784;825;870;954;961;1267;1325;1344;1708	True;True;True;True;True;True;True;True;True;True;True;True;True;True	74;222;240;412;778;795;837;882;966;973;1284;1343;1362;1727	137;138;400;401;435;436;758;759;1399;1400;1401;1402;1403;1404;1428;1429;1498;1499;1588;1589;1590;1591;1744;1745;1756;1757;1758;2340;2341;2442;2443;2474;2475;3120;3121;3122;3123	377;378;379;380;381;382;383;937;938;939;940;941;942;943;944;945;946;947;1002;1003;1004;1005;1798;1799;1800;1801;1802;1803;1804;2983;2984;2985;2986;2987;2988;3018;3019;3020;3021;3130;3131;3132;3133;3134;3135;3136;3137;3337;3338;3339;3340;3341;3342;3343;3344;3345;3346;3347;3348;3349;3612;3613;3614;3636;3637;3638;3639;4754;4755;4756;4757;4758;4759;4760;4761;4960;4961;5009;5010;5011;5012;5013;5014;50…	378;941;1005;1802;2984;3019;3131;3340;3612;3638;4755;4961;5010;6177
sp|P53641|SODF_PSEAE	sp|P53641|SODF_PSEAE	2	2	2	>sp|P53641|SODF_PSEAE Superoxide dismutase [Fe] OS=Pseudomonas aeruginosa (strain ATCC 15692 / PAO1 / 1C / PRS 101 / LMG 12228) GN=sodB PE=3 SV=3	1	2	2	2	13.5	13.5	13.5	21.351	193	193	0	3.9155	96798000	8				58	75;1591	True;True	78;1610	144;145;2921;2922	396;397;398;399;5827;5828;5829;5830	398;5828
sp|P57112|STHA_PSEAE	sp|P57112|STHA_PSEAE	6	6	6	>sp|P57112|STHA_PSEAE Soluble pyridine nucleotide transhydrogenase OS=Pseudomonas aeruginosa (strain ATCC 15692 / PAO1 / 1C / PRS 101 / LMG 12228) GN=sthA PE=1 SV=2	1	6	6	6	14.9	14.9	14.9	51.16	464	464	0	6.3623	76058000	10				59	192;653;985;1336;1381;1601	True;True;True;True;True;True	196;664;997;1354;1399;1620	351;352;1205;1812;1813;2462;2537;2937;2938	870;871;2617;2618;3773;3774;4993;5119;5862;5863	871;2617;3773;4993;5119;5863
sp|P72138|HIS52_PSEAE	sp|P72138|HIS52_PSEAE	1	1	1	>sp|P72138|HIS52_PSEAE Imidazole glycerol phosphate synthase subunit HisH 2 OS=Pseudomonas aeruginosa (strain ATCC 15692 / PAO1 / 1C / PRS 101 / LMG 12228) GN=hisH2 PE=3 SV=2	1	1	1	1	8.4	8.4	8.4	22.695	202	202	0.0083102	0.58203	8914600	1				60	1005	TRUE	1017	1852	3848	3848
sp|P72139|HIS62_PSEAE	sp|P72139|HIS62_PSEAE	2	2	2	>sp|P72139|HIS62_PSEAE Putative imidazole glycerol phosphate synthase subunit hisF2 OS=Pseudomonas aeruginosa (strain ATCC 15692 / PAO1 / 1C / PRS 101 / LMG 12228) GN=hisF2 PE=3 SV=1	1	2	2	2	10	10	10	27.448	251	251	0	3.3041	10255000	2				61	1791;1917	True;True	1811;1937	3262;3477	6447;6886	6447;6886
sp|P72173|AAT_PSEAE	sp|P72173|AAT_PSEAE	11	11	11	>sp|P72173|AAT_PSEAE Aspartate aminotransferase OS=Pseudomonas aeruginosa (strain ATCC 15692 / PAO1 / 1C / PRS 101 / LMG 12228) GN=aspC PE=3 SV=2	1	11	11	11	43	43	43	43.319	398	398	0	44.233	302550000	24				62	88;134;606;638;696;919;1019;1572;1663;1825;1921	True;True;True;True;True;True;True;True;True;True;True	91;138;617;649;707;931;1031;1590;1682;1845;1941	164;165;249;250;1121;1181;1279;1280;1686;1876;1877;2885;3037;3038;3323;3324;3481;3482	448;449;450;451;698;699;2451;2452;2580;2761;2762;2763;2764;3518;3888;3889;3890;5771;6028;6029;6549;6550;6890;6891	448;698;2452;2580;2763;3518;3888;5771;6028;6549;6890
sp|P77915|HEMN_PSEAE	sp|P77915|HEMN_PSEAE	9	9	9	>sp|P77915|HEMN_PSEAE Oxygen-independent coproporphyrinogen-III oxidase OS=Pseudomonas aeruginosa (strain ATCC 15692 / PAO1 / 1C / PRS 101 / LMG 12228) GN=hemN PE=2 SV=2	1	9	9	9	29.8	29.8	29.8	52.488	460	460	0	15.913	96473000	13				63	441;465;821;1094;1432;1793;1889;1900;1915	True;True;True;True;True;True;True;True;True	450;474;833;1108;1450;1813;1909;1920;1935	826;870;1489;1490;2013;2629;2630;3265;3435;3452;3475	1941;2003;3117;3118;4133;5290;5291;5292;6452;6820;6852;6853;6884	1941;2003;3117;4133;5290;6452;6820;6852;6884
sp|Q51342|PUR1_PSEAE	sp|Q51342|PUR1_PSEAE	5	5	5	>sp|Q51342|PUR1_PSEAE Amidophosphoribosyltransferase OS=Pseudomonas aeruginosa (strain ATCC 15692 / PAO1 / 1C / PRS 101 / LMG 12228) GN=purF PE=3 SV=3	1	5	5	5	14.6	14.6	14.6	55.369	501	501	0	14.311	125400000	18				64	289;1002;1040;1455;1499	True;True;True;True;True	296;1014;1053;1473;1517	539;540;1845;1846;1847;1848;1919;2670;2671;2749	1237;1238;3838;3839;3840;3841;3842;3843;3844;3965;3966;5361;5362;5363;5364;5365;5366;5508	1238;3839;3965;5363;5508
sp|Q51390|GLPK2_PSEAE	sp|Q51390|GLPK2_PSEAE	2	2	2	>sp|Q51390|GLPK2_PSEAE Glycerol kinase 2 OS=Pseudomonas aeruginosa (strain ATCC 15692 / PAO1 / 1C / PRS 101 / LMG 12228) GN=glpK2 PE=3 SV=2	1	2	2	2	4	4	4	55.966	505	505	0	2.0442	12980000	2				65	1182;1687	True;True	1197;1706	2174;2175;3083	4424;4425;6122	4425;6122
sp|Q51422|SYDND_PSEAE	sp|Q51422|SYDND_PSEAE	10	10	10	>sp|Q51422|SYDND_PSEAE Aspartate--tRNA(Asp/Asn) ligase OS=Pseudomonas aeruginosa (strain ATCC 15692 / PAO1 / 1C / PRS 101 / LMG 12228) GN=aspS PE=1 SV=2	1	10	10	10	24.2	24.2	24.2	66.207	591	591	0	35.388	269820000	24				66	248;346;488;499;835;1585;1665;1723;1875;1895	True;True;True;True;True;True;True;True;True;True	255;355;498;509;847;1603;1604;1684;1742;1895;1915	462;463;659;911;912;930;931;1522;1523;2906;2907;2908;2909;3042;3043;3144;3145;3412;3413;3444	1056;1057;1626;2082;2083;2130;2131;2132;2133;2134;3211;3212;3213;3214;3215;5804;5805;5806;5807;6033;6034;6217;6218;6219;6787;6788;6837	1056;1626;2082;2130;3215;5807;6033;6218;6788;6837	8	565
sp|Q51551|PYRX_PSEAE	sp|Q51551|PYRX_PSEAE	2	2	2	>sp|Q51551|PYRX_PSEAE Dihydroorotase-like protein OS=Pseudomonas aeruginosa (strain ATCC 15692 / PAO1 / 1C / PRS 101 / LMG 12228) GN=pyrC PE=3 SV=2	1	2	2	2	8	8	8	44.15	423	423	0	2.9651	23714000	3				67	582;1690	True;True	593;1709	1076;1077;3087	2375;2376;6127	2375;6127
sp|Q51561|RPOB_PSEAE	sp|Q51561|RPOB_PSEAE	48	48	48	>sp|Q51561|RPOB_PSEAE DNA-directed RNA polymerase subunit beta OS=Pseudomonas aeruginosa (strain ATCC 15692 / PAO1 / 1C / PRS 101 / LMG 12228) GN=rpoB PE=3 SV=2	1	48	48	48	50	50	50	150.84	1357	1357	0	178.03	2644900000	170				68	99;145;179;298;327;335;348;363;370;372;437;504;560;577;579;601;602;620;656;660;664;686;689;735;868;894;904;988;1055;1058;1078;1090;1146;1156;1195;1198;1208;1368;1458;1476;1484;1519;1536;1616;1703;1783;1866;1878	True;True;True;True;True;True;True;True;True;True;True;True;True;True;True;True;True;True;True;True;True;True;True;True;True;True;True;True;True;True;True;True;True;True;True;True;True;True;True;True;True;True;True;True;True;True;True;True	102;149;183;307;336;344;357;372;379;381;446;514;571;588;590;612;613;631;667;671;675;697;700;746;880;906;916;1000;1068;1072;1092;1104;1160;1161;1171;1210;1213;1223;1386;1476;1494;1502;1537;1554;1635;1722;1803;1886;1898	184;185;270;327;328;573;625;626;627;628;642;662;663;689;690;701;702;704;705;821;939;1039;1040;1068;1069;1071;1110;1111;1112;1113;1149;1209;1210;1217;1218;1224;1225;1260;1261;1266;1267;1345;1346;1584;1585;1632;1633;1652;1653;1817;1818;1947;1951;1952;1953;1954;1987;1988;2006;2007;2108;2109;2110;2111;2112;2126;2127;2197;2202;2203;2204;2222;2223;2512;2513;2675;2706;2707;2722;2723;2786;2787;2825;2960;…	485;486;487;488;489;490;491;740;831;832;833;834;835;1463;1558;1559;1560;1561;1562;1563;1564;1565;1566;1567;1568;1569;1570;1571;1572;1593;1594;1631;1632;1633;1634;1635;1636;1681;1682;1683;1698;1699;1700;1701;1703;1704;1705;1935;2149;2326;2327;2328;2329;2365;2366;2367;2369;2434;2435;2436;2437;2438;2439;2440;2526;2625;2626;2627;2628;2638;2639;2650;2651;2652;2725;2726;2743;2744;2745;2746;2859;2860;28…	485;740;834;1463;1560;1593;1636;1681;1698;1705;1935;2149;2327;2365;2369;2436;2440;2526;2625;2639;2652;2726;2746;2859;3333;3419;3447;3779;4012;4020;4096;4124;4327;4356;4460;4466;4508;5084;5371;5422;5459;5583;5681;5903;6162;6432;6646;6791	9	1019
sp|Q51567|SUCD_PSEAE	sp|Q51567|SUCD_PSEAE	9	9	9	>sp|Q51567|SUCD_PSEAE Succinyl-CoA ligase [ADP-forming] subunit alpha OS=Pseudomonas aeruginosa (strain ATCC 15692 / PAO1 / 1C / PRS 101 / LMG 12228) GN=sucD PE=3 SV=2	1	9	9	9	45.4	45.4	45.4	30.266	295	295	0	23.077	406810000	53				69	121;175;326;466;599;769;962;1167;1421	True;True;True;True;True;True;True;True;True	125;179;335;475;610;780;974;1182;1439	229;230;321;623;624;871;872;1106;1107;1406;1759;1760;1761;1762;1763;1764;2147;2609;2610	664;665;666;667;668;669;822;1552;1553;1554;1555;1556;1557;2004;2005;2006;2007;2008;2009;2430;2431;2991;3640;3641;3642;3643;3644;3645;3646;3647;3648;3649;3650;3651;3652;3653;3654;3655;3656;3657;3658;3659;3660;3661;3662;3663;3664;3665;3666;3667;3668;4386;5261;5262	664;822;1557;2005;2431;2991;3659;4386;5261
sp|Q59636|NDK_PSEAE	sp|Q59636|NDK_PSEAE	2	2	2	>sp|Q59636|NDK_PSEAE Nucleoside diphosphate kinase OS=Pseudomonas aeruginosa (strain ATCC 15692 / PAO1 / 1C / PRS 101 / LMG 12228) GN=ndk PE=3 SV=2	1	2	2	2	23.1	23.1	23.1	15.592	143	143	0	6.1121	33180000	9				70	304;1290	True;True	313;1308	583;584;2384;2385	1479;1480;1481;1482;1483;1484;1485;4863;4864	1484;4864
sp|Q59637|ODP1_PSEAE	sp|Q59637|ODP1_PSEAE	30	30	30	>sp|Q59637|ODP1_PSEAE Pyruvate dehydrogenase E1 component OS=Pseudomonas aeruginosa (strain ATCC 15692 / PAO1 / 1C / PRS 101 / LMG 12228) GN=aceE PE=3 SV=2	1	30	30	30	36.3	36.3	36.3	99.563	882	882	0	75.292	1455400000	105				71	13;102;286;301;330;349;397;541;641;651;764;787;788;843;874;1150;1201;1206;1236;1237;1246;1288;1348;1376;1422;1448;1525;1724;1851;1879	True;True;True;True;True;True;True;True;True;True;True;True;True;True;True;True;True;True;True;True;True;True;True;True;True;True;True;True;True;True	14;105;293;310;339;358;406;552;652;662;775;798;799;855;886;1165;1216;1221;1253;1254;1263;1306;1366;1394;1440;1466;1543;1743;1871;1899	24;25;188;534;535;576;577;633;634;664;747;748;1005;1006;1007;1186;1202;1203;1395;1396;1433;1434;1435;1436;1534;1535;1598;1599;2117;2118;2208;2209;2217;2218;2219;2292;2293;2294;2308;2309;2380;2381;2480;2481;2524;2525;2611;2612;2657;2658;2799;2800;3146;3147;3368;3369;3418	34;35;36;37;38;39;494;1231;1232;1466;1467;1468;1577;1578;1579;1580;1581;1637;1780;1781;1782;1783;1784;2263;2264;2265;2266;2267;2268;2269;2270;2271;2272;2587;2611;2612;2613;2976;2977;2978;2979;2980;3025;3026;3027;3028;3029;3030;3231;3232;3233;3234;3235;3236;3358;3359;3360;3361;3362;3363;4339;4340;4341;4477;4478;4479;4480;4481;4482;4483;4498;4499;4500;4501;4502;4503;4679;4680;4681;4682;4703;4704;48…	34;494;1232;1468;1579;1637;1780;2269;2587;2611;2979;3025;3029;3235;3359;4341;4478;4498;4680;4682;4703;4846;5025;5097;5264;5347;5603;6220;6615;6794
sp|Q59638|ODP2_PSEAE	sp|Q59638|ODP2_PSEAE	19	19	19	>sp|Q59638|ODP2_PSEAE Dihydrolipoyllysine-residue acetyltransferase component of pyruvate dehydrogenase complex OS=Pseudomonas aeruginosa (strain ATCC 15692 / PAO1 / 1C / PRS 101 / LMG 12228) GN=aceF PE=2 SV=2	1	19	19	19	52.5	52.5	52.5	56.708	547	547	0	54.32	655020000	64				72	45;48;50;174;220;416;487;808;971;1013;1035;1036;1106;1417;1441;1494;1666;1757;1758	True;True;True;True;True;True;True;True;True;True;True;True;True;True;True;True;True;True;True	48;51;53;178;226;425;497;819;983;1025;1048;1049;1120;1435;1459;1512;1685;1777;1778	96;97;100;101;103;319;320;409;784;785;909;910;1464;1783;1784;1867;1909;1910;1911;1912;2032;2033;2602;2603;2646;2647;2741;2742;3044;3045;3206;3207;3208	293;294;295;296;297;300;301;302;303;304;305;307;308;820;821;957;1870;1871;1872;2078;2079;2080;2081;3073;3709;3710;3872;3949;3950;3951;3952;3953;4168;4169;4170;4171;4172;5252;5253;5254;5255;5316;5317;5318;5319;5320;5321;5322;5323;5324;5325;5326;5327;5497;5498;5499;6035;6036;6037;6038;6039;6344;6345;6346	294;301;308;821;957;1872;2079;3073;3709;3872;3950;3953;4169;5254;5326;5498;6037;6344;6346
sp|Q59653|PYRB_PSEAE	sp|Q59653|PYRB_PSEAE	1	1	1	>sp|Q59653|PYRB_PSEAE Aspartate carbamoyltransferase OS=Pseudomonas aeruginosa (strain ATCC 15692 / PAO1 / 1C / PRS 101 / LMG 12228) GN=pyrB PE=3 SV=2	1	1	1	1	5.7	5.7	5.7	36.629	334	334	0	7.9666	9612200	10				73	414	TRUE	423	780;781;782	1859;1860;1861;1862;1863;1864;1865;1866;1867;1868	1862
sp|Q9HT16|ATPF_PSEAE	sp|Q9HT16|ATPF_PSEAE	2	2	2	>sp|Q9HT16|ATPF_PSEAE ATP synthase subunit b OS=Pseudomonas aeruginosa (strain ATCC 15692 / PAO1 / 1C / PRS 101 / LMG 12228) GN=atpF PE=3 SV=1	1	2	2	2	17.9	17.9	17.9	16.956	156	156	0	10.551	42001000	3				74	188;199	True;True	192;204	345;368;369	863;900;901	863;900
sp|Q9HT17|ATPD_PSEAE	sp|Q9HT17|ATPD_PSEAE	1	1	1	>sp|Q9HT17|ATPD_PSEAE ATP synthase subunit delta OS=Pseudomonas aeruginosa (strain ATCC 15692 / PAO1 / 1C / PRS 101 / LMG 12228) GN=atpH PE=3 SV=1	1	1	1	1	8.4	8.4	8.4	19.26	178	178	0	1.1074	3634600	1				75	955	TRUE	967	1746	3615	3615
sp|Q9HT18|ATPA_PSEAE	sp|Q9HT18|ATPA_PSEAE	17	17	17	>sp|Q9HT18|ATPA_PSEAE ATP synthase subunit alpha OS=Pseudomonas aeruginosa (strain ATCC 15692 / PAO1 / 1C / PRS 101 / LMG 12228) GN=atpA PE=3 SV=1	1	17	17	17	39.3	39.3	39.3	55.393	514	514	0	67.53	990990000	70				76	320;361;402;558;586;800;1240;1339;1369;1482;1483;1504;1505;1627;1680;1785;1807	True;True;True;True;True;True;True;True;True;True;True;True;True;True;True;True;True	329;370;411;569;597;811;1257;1357;1387;1500;1501;1522;1523;1646;1699;1805;1827	612;613;614;684;685;756;757;1035;1036;1083;1084;1454;1455;2297;2298;2466;2467;2514;2718;2719;2720;2721;2759;2760;2761;2979;2980;3071;3072;3073;3254;3255;3291;3292	1537;1538;1539;1672;1673;1794;1795;1796;1797;2319;2320;2321;2322;2323;2386;2387;2388;2389;2390;2391;2392;3052;3053;3054;3055;3056;3057;3058;3059;3060;4685;4686;4687;4688;4997;4998;4999;5085;5449;5450;5451;5452;5453;5454;5455;5456;5525;5526;5527;5528;5529;5530;5531;5937;5938;5939;5940;6095;6096;6097;6098;6099;6100;6101;6438;6439;6495;6496;6497;6498	1537;1673;1796;2320;2386;3053;4687;4999;5085;5451;5455;5525;5527;5938;6101;6438;6498
sp|Q9HT19|ATPG_PSEAE	sp|Q9HT19|ATPG_PSEAE	6	6	6	>sp|Q9HT19|ATPG_PSEAE ATP synthase gamma chain OS=Pseudomonas aeruginosa (strain ATCC 15692 / PAO1 / 1C / PRS 101 / LMG 12228) GN=atpG PE=3 SV=1	1	6	6	6	31.1	31.1	31.1	31.553	286	286	0	31.008	172870000	19				77	1232;1365;1407;1440;1684;1742	True;True;True;True;True;True	1249;1383;1425;1458;1703;1761	2285;2286;2506;2584;2585;2586;2644;2645;3078;3079;3177;3178	4667;4668;4669;4670;4671;4672;4673;5071;5210;5211;5212;5213;5214;5215;5216;5217;5313;5314;5315;6117;6118;6260;6261	4672;5071;5212;5314;6118;6260
sp|Q9HT20|ATPB_PSEAE	sp|Q9HT20|ATPB_PSEAE	14	14	14	>sp|Q9HT20|ATPB_PSEAE ATP synthase subunit beta OS=Pseudomonas aeruginosa (strain ATCC 15692 / PAO1 / 1C / PRS 101 / LMG 12228) GN=atpD PE=3 SV=1	1	14	14	14	45.9	45.9	45.9	49.499	458	458	0	81.784	480270000	42				78	279;282;358;512;682;818;1203;1341;1426;1603;1624;1625;1673;1914	True;True;True;True;True;True;True;True;True;True;True;True;True;True	286;289;367;522;693;830;1218;1359;1444;1622;1643;1644;1692;1934	522;523;528;678;679;953;954;1253;1483;1484;2212;2213;2470;2618;2941;2974;2975;2976;2977;3059;3473;3474	1216;1217;1218;1219;1224;1225;1658;1659;1660;2179;2180;2181;2182;2714;3107;3108;3109;4486;4487;4488;4489;4490;4491;4492;5004;5272;5868;5926;5927;5928;5929;5930;5931;5932;5933;5934;5935;6075;6880;6881;6882;6883	1218;1225;1659;2181;2714;3108;4490;5004;5272;5868;5928;5935;6075;6881
sp|Q9HT95|ATSE4_PSEAE	sp|Q9HT95|ATSE4_PSEAE	3	3	3	>sp|Q9HT95|ATSE4_PSEAE Acetyltransferase PA5475 OS=Pseudomonas aeruginosa (strain ATCC 15692 / PAO1 / 1C / PRS 101 / LMG 12228) GN=PA5475 PE=3 SV=1	1	3	3	3	22.6	22.6	22.6	21	186	186	0	15.756	58285000	11				79	314;1354;1465	True;True;True	323;1372;1483	600;601;602;603;2489;2490;2687;2688	1523;1524;1525;1526;5035;5036;5037;5038;5039;5390;5391	1524;5035;5391
sp|Q9HTD7|ASPA_PSEAE	sp|Q9HTD7|ASPA_PSEAE	7	7	7	>sp|Q9HTD7|ASPA_PSEAE Aspartate ammonia-lyase OS=Pseudomonas aeruginosa (strain ATCC 15692 / PAO1 / 1C / PRS 101 / LMG 12228) GN=aspA PE=3 SV=1	1	7	7	7	34.6	34.6	34.6	51.069	474	474	0	11.561	116860000	21				80	294;899;921;987;1015;1086;1581	True;True;True;True;True;True;True	301;911;933;999;1027;1100;1599	548;549;1646;1647;1689;1816;1869;1870;1999;2899;2900	1248;1249;1250;3437;3438;3521;3522;3777;3874;3875;3876;3877;3878;4111;5790;5791;5792;5793;5794;5795;5796;5797	1248;3438;3521;3777;3874;4111;5790
sp|Q9HTJ1|BETB_PSEAE	sp|Q9HTJ1|BETB_PSEAE	1	1	1	>sp|Q9HTJ1|BETB_PSEAE NAD/NADP-dependent betaine aldehyde dehydrogenase OS=Pseudomonas aeruginosa (strain ATCC 15692 / PAO1 / 1C / PRS 101 / LMG 12228) GN=betB PE=1 SV=1	1	1	1	1	2.7	2.7	2.7	53.332	490	490	0	1.1346	11764000	4				81	1459	TRUE	1477	2676;2677	5372;5373;5374;5375	5374
sp|Q9HTN8|RL28_PSEAE	sp|Q9HTN8|RL28_PSEAE	1	1	1	>sp|Q9HTN8|RL28_PSEAE 50S ribosomal protein L28 OS=Pseudomonas aeruginosa (strain ATCC 15692 / PAO1 / 1C / PRS 101 / LMG 12228) GN=rpmB PE=3 SV=1	1	1	1	1	12.8	12.8	12.8	9.0655	78	78	0	3.1075	33089000	5				82	612	TRUE	623	1135;1136	2496;2497;2498;2499;2500	2499
sp|Q9HTQ0|DADA1_PSEAE	sp|Q9HTQ0|DADA1_PSEAE	5	5	5	>sp|Q9HTQ0|DADA1_PSEAE D-amino acid dehydrogenase 1 OS=Pseudomonas aeruginosa (strain ATCC 15692 / PAO1 / 1C / PRS 101 / LMG 12228) GN=dadA1 PE=1 SV=1	1	5	5	5	16.2	16.2	16.2	47.139	432	432	0	14.205	133080000	9				83	67;702;1104;1423;1554	True;True;True;True;True	70;713;1118;1441;1572	127;1290;2028;2029;2613;2614;2856;2857	343;2789;4164;4165;5265;5266;5723;5724;5725	343;2789;4164;5265;5723
sp|Q9HTV1|RHO_PSEAE	sp|Q9HTV1|RHO_PSEAE	4	4	4	>sp|Q9HTV1|RHO_PSEAE Transcription termination factor Rho OS=Pseudomonas aeruginosa (strain ATCC 15692 / PAO1 / 1C / PRS 101 / LMG 12228) GN=rho PE=3 SV=1	1	4	4	4	15	15	15	47.069	419	419	0	22.943	48796000	6				84	801;1157;1413;1544	True;True;True;True	812;1172;1431;1562	1456;2128;2129;2595;2596;2839	3061;4358;4359;5242;5243;5700	3061;4358;5243;5700
sp|Q9HTZ7|PCKA_PSEAE	sp|Q9HTZ7|PCKA_PSEAE	5	5	5	>sp|Q9HTZ7|PCKA_PSEAE Phosphoenolpyruvate carboxykinase [ATP] OS=Pseudomonas aeruginosa (strain ATCC 15692 / PAO1 / 1C / PRS 101 / LMG 12228) GN=pckA PE=3 SV=1	1	5	5	5	18.1	18.1	18.1	55.731	513	513	0	19.867	65032000	6				85	240;486;1212;1579;1832	True;True;True;True;True	246;496;1227;1597;1852	445;446;908;2231;2897;3336	1021;1022;2077;4518;5788;6566	1021;2077;4518;5788;6566
sp|Q9HU65|GLNA_PSEAE	sp|Q9HU65|GLNA_PSEAE	9	9	9	>sp|Q9HU65|GLNA_PSEAE Glutamine synthetase OS=Pseudomonas aeruginosa (strain ATCC 15692 / PAO1 / 1C / PRS 101 / LMG 12228) GN=glnA PE=1 SV=1	1	9	9	9	30.9	30.9	30.9	51.944	469	469	0	31.893	404730000	48				86	148;522;840;1127;1160;1287;1393;1475;1529	True;True;True;True;True;True;True;True;True	152;532;533;852;1141;1175;1305;1411;1493;1547	273;274;975;976;977;978;1529;1530;2078;2079;2133;2134;2377;2378;2379;2561;2703;2704;2705;2814;2815	743;744;745;2212;2213;2214;2215;2216;2217;2218;2219;2220;2221;2222;2223;2224;2225;2226;2227;3223;3224;3225;3226;4256;4257;4258;4259;4364;4365;4366;4367;4840;4841;4842;4843;4844;5153;5413;5414;5415;5416;5417;5418;5419;5420;5667;5668;5669	744;2218;3224;4256;4364;4841;5153;5415;5667	10	377
sp|Q9HU83|HUTU_PSEAE	sp|Q9HU83|HUTU_PSEAE	1	1	1	>sp|Q9HU83|HUTU_PSEAE Urocanate hydratase OS=Pseudomonas aeruginosa (strain ATCC 15692 / PAO1 / 1C / PRS 101 / LMG 12228) GN=hutU PE=1 SV=1	1	1	1	1	1.8	1.8	1.8	61.193	559	559	0.0085227	0.70601	5682900	1				87	984	TRUE	996	1811	3772	3772
sp|Q9HUA6|OPGH_PSEAE	sp|Q9HUA6|OPGH_PSEAE	1	1	1	>sp|Q9HUA6|OPGH_PSEAE Glucans biosynthesis glucosyltransferase H OS=Pseudomonas aeruginosa (strain ATCC 15692 / PAO1 / 1C / PRS 101 / LMG 12228) GN=opgH PE=3 SV=1	1	1	1	1	1.9	1.9	1.9	96.994	861	861	0	1.3039	1414900	1				88	844	TRUE	856	1536	3237	3237
sp|Q9HUC0|UBIE_PSEAE	sp|Q9HUC0|UBIE_PSEAE	1	1	1	>sp|Q9HUC0|UBIE_PSEAE Ubiquinone/menaquinone biosynthesis C-methyltransferase UbiE OS=Pseudomonas aeruginosa (strain ATCC 15692 / PAO1 / 1C / PRS 101 / LMG 12228) GN=ubiE PE=3 SV=1	1	1	1	1	5.1	5.1	5.1	28.254	256	256	0	1.2718	5351800	1				89	1714	TRUE	1733	3131	6197	6197
sp|Q9HUC8|SYR_PSEAE	sp|Q9HUC8|SYR_PSEAE	3	3	3	>sp|Q9HUC8|SYR_PSEAE Arginine--tRNA ligase OS=Pseudomonas aeruginosa (strain ATCC 15692 / PAO1 / 1C / PRS 101 / LMG 12228) GN=argS PE=3 SV=1	1	3	3	3	9.2	9.2	9.2	65.199	587	587	0	6.8674	34409000	4				90	82;1089;1551	True;True;True	85;1103;1569	157;2005;2849;2850	439;4122;5713;5714	439;4122;5714
sp|Q9HUD0|RL31_PSEAE	sp|Q9HUD0|RL31_PSEAE	1	1	1	>sp|Q9HUD0|RL31_PSEAE 50S ribosomal protein L31 OS=Pseudomonas aeruginosa (strain ATCC 15692 / PAO1 / 1C / PRS 101 / LMG 12228) GN=rpmE PE=1 SV=1	1	1	1	1	11.3	11.3	11.3	7.9201	71	71	0.0084986	0.6943	8630400	1				91	494	TRUE	504	922	2116	2116
sp|Q9HUG9|HLDE_PSEAE	sp|Q9HUG9|HLDE_PSEAE	1	1	1	>sp|Q9HUG9|HLDE_PSEAE Bifunctional protein HldE OS=Pseudomonas aeruginosa (strain ATCC 15692 / PAO1 / 1C / PRS 101 / LMG 12228) GN=hldE PE=3 SV=1	1	1	1	1	3.4	3.4	3.4	50.348	474	474	0	3.2781	8832700	1				92	1515	TRUE	1533	2780	5574	5574
sp|Q9HUJ8|PARE_PSEAE	sp|Q9HUJ8|PARE_PSEAE	2	2	2	>sp|Q9HUJ8|PARE_PSEAE DNA topoisomerase 4 subunit B OS=Pseudomonas aeruginosa (strain ATCC 15692 / PAO1 / 1C / PRS 101 / LMG 12228) GN=parE PE=3 SV=1	1	2	2	2	3.5	3.5	3.5	69.178	629	629	0	1.4402	12043000	1				93	1497;1652	True;True	1515;1671	2747;3019	5506;6002	5506;6002
sp|Q9HUM0|HFQ_PSEAE	sp|Q9HUM0|HFQ_PSEAE	1	1	1	>sp|Q9HUM0|HFQ_PSEAE RNA-binding protein Hfq OS=Pseudomonas aeruginosa (strain ATCC 15692 / PAO1 / 1C / PRS 101 / LMG 12228) GN=hfq PE=1 SV=1	1	1	1	1	15.9	15.9	15.9	9.1034	82	82	0.0084034	0.62874	18148000	4				94	1070	TRUE	1084	1972;1973	4057;4058;4059;4060	4057
sp|Q9HUM6|PURA_PSEAE	sp|Q9HUM6|PURA_PSEAE	3	3	3	>sp|Q9HUM6|PURA_PSEAE Adenylosuccinate synthetase OS=Pseudomonas aeruginosa (strain ATCC 15692 / PAO1 / 1C / PRS 101 / LMG 12228) GN=purA PE=3 SV=1	1	3	3	3	9.5	9.5	9.5	46.814	430	430	0	15.511	73104000	16				95	948;1549;1681	True;True;True	960;1567;1700	1735;1736;2847;3074;3075	3603;3604;5711;6102;6103;6104;6105;6106;6107;6108;6109;6110;6111;6112;6113;6114	3604;5711;6104
sp|Q9HUM9|RS6_PSEAE	sp|Q9HUM9|RS6_PSEAE	3	3	3	>sp|Q9HUM9|RS6_PSEAE 30S ribosomal protein S6 OS=Pseudomonas aeruginosa (strain ATCC 15692 / PAO1 / 1C / PRS 101 / LMG 12228) GN=rpsF PE=3 SV=1	1	3	3	3	16.5	16.5	16.5	16.164	139	139	0	8.7753	71244000	7				96	120;265;1374	True;True;True	124;272;1392	227;228;496;497;2520;2521;2522	661;662;663;1164;1165;5092;5093;5094	661;1165;5092
sp|Q9HW26|PNCB2_PSEAE;sp|Q9HUP4|PNCB1_PSEAE	sp|Q9HW26|PNCB2_PSEAE;sp|Q9HUP4|PNCB1_PSEAE	1;1	1;1	1;1	>sp|Q9HW26|PNCB2_PSEAE Nicotinate phosphoribosyltransferase 2 OS=Pseudomonas aeruginosa (strain ATCC 15692 / PAO1 / 1C / PRS 101 / LMG 12228) GN=pncB2 PE=1 SV=1;>sp|Q9HUP4|PNCB1_PSEAE Nicotinate phosphoribosyltransferase 1 OS=Pseudomonas aeruginosa (strain	2	1	1	1	3	3	3	45.69	398	398;399	0	5.9961	0	1				97	875	TRUE	887	1600	3364	3364
sp|Q9HUU5|URE1_PSEAE	sp|Q9HUU5|URE1_PSEAE	1	1	1	>sp|Q9HUU5|URE1_PSEAE Urease subunit alpha OS=Pseudomonas aeruginosa (strain ATCC 15692 / PAO1 / 1C / PRS 101 / LMG 12228) GN=ureC PE=3 SV=1	1	1	1	1	3.7	3.7	3.7	60.61	566	566	0	7.9264	12720000	1				98	643	TRUE	654	1189	2590	2590
sp|Q9HUX1|SPEA_PSEAE	sp|Q9HUX1|SPEA_PSEAE	1	1	1	>sp|Q9HUX1|SPEA_PSEAE Biosynthetic arginine decarboxylase OS=Pseudomonas aeruginosa (strain ATCC 15692 / PAO1 / 1C / PRS 101 / LMG 12228) GN=speA PE=3 SV=1	1	1	1	1	2.2	2.2	2.2	70.667	636	636	0.0029674	0.96815	26839000	2				99	491	TRUE	501	918;919	2112;2113	2112
sp|Q9HV43|DNAK_PSEAE	sp|Q9HV43|DNAK_PSEAE	8	8	8	>sp|Q9HV43|DNAK_PSEAE Chaperone protein DnaK OS=Pseudomonas aeruginosa (strain ATCC 15692 / PAO1 / 1C / PRS 101 / LMG 12228) GN=dnaK PE=3 SV=1	1	8	8	8	18.1	18.1	18.1	68.402	637	637	0	60.147	262840000	22				100	135;214;480;998;1197;1219;1317;1597	True;True;True;True;True;True;True;True	139;220;490;1010;1212;1236;1335;1616	251;252;397;398;898;899;1834;1835;2200;2201;2255;2256;2257;2258;2429;2430;2932	700;701;933;934;935;2065;2066;3801;3802;4463;4464;4593;4594;4595;4596;4597;4598;4599;4600;4601;4940;4941;5857	700;933;2065;3802;4464;4599;4941;5857
sp|Q9HV50|GLMM_PSEAE	sp|Q9HV50|GLMM_PSEAE	4	4	4	>sp|Q9HV50|GLMM_PSEAE Phosphoglucosamine mutase OS=Pseudomonas aeruginosa (strain ATCC 15692 / PAO1 / 1C / PRS 101 / LMG 12228) GN=glmM PE=3 SV=1	1	4	4	4	13.3	13.3	13.3	47.796	445	445	0	8.0532	79532000	12				101	1057;1469;1670;1919	True;True;True;True	1070;1071;1487;1689;1939	1949;1950;2693;2694;3054;3055;3479	4015;4016;4017;5399;5400;5401;5402;6064;6065;6066;6067;6888	4017;5401;6065;6888	11	136
sp|Q9HV55|IF2_PSEAE	sp|Q9HV55|IF2_PSEAE	12	12	12	>sp|Q9HV55|IF2_PSEAE Translation initiation factor IF-2 OS=Pseudomonas aeruginosa (strain ATCC 15692 / PAO1 / 1C / PRS 101 / LMG 12228) GN=infB PE=3 SV=1	1	12	12	12	22.1	22.1	22.1	90.911	840	840	0	35.897	207570000	21				102	8;405;426;657;734;991;1128;1129;1168;1248;1589;1924	True;True;True;True;True;True;True;True;True;True;True;True	9;414;435;668;745;1003;1142;1143;1183;1265;1608;1944	15;762;763;802;1211;1212;1343;1344;1823;1824;2080;2081;2082;2148;2149;2312;2916;3487	19;1814;1815;1898;2629;2630;2857;2858;3785;3786;3787;4260;4261;4262;4263;4387;4388;4389;4709;5814;6897	19;1815;1898;2630;2858;3785;4261;4262;4389;4709;5814;6897
sp|Q9HV59|PNP_PSEAE	sp|Q9HV59|PNP_PSEAE	23	23	23	>sp|Q9HV59|PNP_PSEAE Polyribonucleotide nucleotidyltransferase OS=Pseudomonas aeruginosa (strain ATCC 15692 / PAO1 / 1C / PRS 101 / LMG 12228) GN=pnp PE=3 SV=1	1	23	23	23	45.1	45.1	45.1	75.452	701	701	0	76.181	741060000	69				103	56;58;177;185;207;257;317;332;401;474;578;669;685;753;823;834;864;1048;1049;1324;1395;1739;1795	True;True;True;True;True;True;True;True;True;True;True;True;True;True;True;True;True;True;True;True;True;True;True	59;61;181;189;213;264;326;341;410;484;589;680;696;764;835;846;876;1061;1062;1342;1413;1758;1815	112;115;116;324;325;337;338;384;478;608;609;636;637;755;886;887;888;889;1070;1232;1233;1257;1258;1259;1376;1492;1493;1494;1495;1521;1574;1575;1933;1934;1935;1936;2441;2564;2565;2566;3171;3172;3267;3268	319;324;325;825;826;827;828;829;845;846;847;848;919;1087;1088;1532;1533;1583;1584;1585;1793;2043;2044;2045;2046;2047;2048;2049;2050;2368;2666;2667;2668;2669;2670;2722;2723;2724;2943;3120;3121;3122;3123;3124;3125;3126;3210;3314;3315;3316;3317;3987;3988;3989;3990;4959;5171;5172;5173;5174;5175;5176;5177;5178;5179;6250;6251;6252;6454;6455;6456;6457	319;325;825;845;919;1087;1532;1583;1793;2050;2368;2666;2724;2943;3123;3210;3314;3987;3989;4959;5173;6250;6457
sp|Q9HVA2|ILVC_PSEAE	sp|Q9HVA2|ILVC_PSEAE	5	5	5	>sp|Q9HVA2|ILVC_PSEAE Ketol-acid reductoisomerase OS=Pseudomonas aeruginosa (strain ATCC 15692 / PAO1 / 1C / PRS 101 / LMG 12228) GN=ilvC PE=1 SV=1	1	5	5	5	20.1	20.1	20.1	36.424	338	338	0	37.055	178910000	17				104	39;167;325;594;1162	True;True;True;True;True	40;171;334;605;1177	65;66;302;303;622;1098;1099;2137;2138	118;119;120;786;787;788;789;1551;2411;2412;2413;2414;2415;2416;2417;4370;4371;4372	120;788;1551;2415;4371
sp|Q9HVC4|RL25_PSEAE	sp|Q9HVC4|RL25_PSEAE	3	3	3	>sp|Q9HVC4|RL25_PSEAE 50S ribosomal protein L25 OS=Pseudomonas aeruginosa (strain ATCC 15692 / PAO1 / 1C / PRS 101 / LMG 12228) GN=rplY PE=3 SV=1	1	3	3	3	22.1	22.1	22.1	21.962	204	204	0	4.371	29135000	4				105	300;1017;1646	True;True;True	309;1029;1665	575;1873;3010;3011	1465;3883;5988;5989	1465;3883;5989
sp|Q9HVC5|KPRS_PSEAE	sp|Q9HVC5|KPRS_PSEAE	5	5	5	>sp|Q9HVC5|KPRS_PSEAE Ribose-phosphate pyrophosphokinase OS=Pseudomonas aeruginosa (strain ATCC 15692 / PAO1 / 1C / PRS 101 / LMG 12228) GN=prs PE=3 SV=1	1	5	5	5	20.4	20.4	20.4	34.04	313	313	0	13.202	84883000	8				106	846;852;1196;1349;1806	True;True;True;True;True	858;864;1211;1367;1826	1539;1540;1550;2198;2199;2482;3289;3290	3240;3241;3270;4461;4462;5028;6492;6493;6494	3241;3270;4462;5028;6492
sp|Q9HVF1|MQO2_PSEAE	sp|Q9HVF1|MQO2_PSEAE	4	4	4	>sp|Q9HVF1|MQO2_PSEAE Probable malate:quinone oxidoreductase 2 OS=Pseudomonas aeruginosa (strain ATCC 15692 / PAO1 / 1C / PRS 101 / LMG 12228) GN=mqo2 PE=3 SV=1	1	4	4	4	15.4	15.4	15.4	55.498	507	507	0	12.153	82406000	6				107	539;583;1643;1898	True;True;True;True	550;594;1662;1918	1002;1003;1078;1079;3006;3448	2260;2261;2377;2378;5984;6841	2261;2378;5984;6841
sp|Q9HVI7|GLYA3_PSEAE;sp|Q9I138|GLYA2_PSEAE	sp|Q9HVI7|GLYA3_PSEAE	4;1	4;1	4;1	>sp|Q9HVI7|GLYA3_PSEAE Serine hydroxymethyltransferase 3 OS=Pseudomonas aeruginosa (strain ATCC 15692 / PAO1 / 1C / PRS 101 / LMG 12228) GN=glyA2 PE=3 SV=1	2	4	4	4	9.1	9.1	9.1	45.157	417	417;418	0	4.4487	60092000	7				108	776;1229;1457;1612	True;True;True;True	787;1246;1475;1631	1417;2280;2281;2673;2674;2954	3007;4662;4663;5368;5369;5370;5889	3007;4662;5369;5889
sp|Q9HVM4|SYI_PSEAE	sp|Q9HVM4|SYI_PSEAE	13	13	13	>sp|Q9HVM4|SYI_PSEAE Isoleucine--tRNA ligase OS=Pseudomonas aeruginosa (strain ATCC 15692 / PAO1 / 1C / PRS 101 / LMG 12228) GN=ileS PE=3 SV=1	1	13	13	13	18.9	18.9	18.9	105.46	943	943	0	47.781	259450000	28				109	129;215;219;230;383;459;566;931;994;1372;1437;1568;1600	True;True;True;True;True;True;True;True;True;True;True;True;True	133;221;225;236;392;468;577;943;1006;1390;1455;1586;1619	242;399;408;427;428;723;858;859;1048;1708;1709;1828;1829;2517;2637;2638;2639;2640;2878;2936	684;936;956;990;991;1735;1979;1980;1981;2338;3565;3566;3567;3792;3793;3794;3795;5088;5089;5301;5302;5303;5304;5305;5306;5307;5759;5861	684;936;956;991;1735;1979;2338;3566;3792;5089;5307;5759;5861
sp|Q9HVN5|CLPB_PSEAE	sp|Q9HVN5|CLPB_PSEAE	7	5	5	>sp|Q9HVN5|CLPB_PSEAE Chaperone protein ClpB OS=Pseudomonas aeruginosa (strain ATCC 15692 / PAO1 / 1C / PRS 101 / LMG 12228) GN=clpB PE=3 SV=1	1	7	5	5	11	8.3	8.3	95.004	854	854	0	24.931	44144000	15				110	69;119;590;1275;1503;1738;1846	True;True;True;False;False;True;True	72;123;601;1292;1521;1757;1866	131;132;225;226;1090;1091;2352;2353;2757;2758;3170;3361;3362	354;355;356;357;358;359;360;658;659;660;2400;2401;4776;4777;4778;5522;5523;5524;6249;6602;6603	355;660;2400;4777;5523;6249;6603
sp|Q9HVT8|GATA_PSEAE	sp|Q9HVT8|GATA_PSEAE	3	3	3	>sp|Q9HVT8|GATA_PSEAE Glutamyl-tRNA(Gln) amidotransferase subunit A OS=Pseudomonas aeruginosa (strain ATCC 15692 / PAO1 / 1C / PRS 101 / LMG 12228) GN=gatA PE=1 SV=1	1	3	3	3	9.1	9.1	9.1	51.862	484	484	0	9.3327	25080000	6				111	718;1028;1765	True;True;True	729;1040;1785	1318;1319;1893;3218;3219	2821;2822;3914;6361;6362;6363	2822;3914;6361
sp|Q9HVV3|Y4465_PSEAE	sp|Q9HVV3|Y4465_PSEAE	2	2	2	>sp|Q9HVV3|Y4465_PSEAE Nucleotide-binding protein PA4465 OS=Pseudomonas aeruginosa (strain ATCC 15692 / PAO1 / 1C / PRS 101 / LMG 12228) GN=PA4465 PE=3 SV=1	1	2	2	2	15.7	15.7	15.7	32.218	286	286	0	9.9987	24894000	5				112	462;1434	True;True	471;1452	863;2632;2633	1985;5294;5295;5296;5297	1985;5295
sp|Q9HVW7|MURA_PSEAE	sp|Q9HVW7|MURA_PSEAE	3	3	3	>sp|Q9HVW7|MURA_PSEAE UDP-N-acetylglucosamine 1-carboxyvinyltransferase OS=Pseudomonas aeruginosa (strain ATCC 15692 / PAO1 / 1C / PRS 101 / LMG 12228) GN=murA PE=1 SV=1	1	3	3	3	15.7	15.7	15.7	44.645	421	421	0	3.676	15454000	1				113	201;554;1508	True;True;True	206;565;1526	371;372;1027;2766	903;904;2304;5538	904;2304;5538
sp|Q9HVX6|SYW_PSEAE	sp|Q9HVX6|SYW_PSEAE	1	1	1	>sp|Q9HVX6|SYW_PSEAE Tryptophan--tRNA ligase OS=Pseudomonas aeruginosa (strain ATCC 15692 / PAO1 / 1C / PRS 101 / LMG 12228) GN=trpS PE=3 SV=1	1	1	1	1	2.9	2.9	2.9	48.961	448	448	0.0057971	0.84623	0	1				114	963	TRUE	975	1765	3669	3669
sp|Q9HW01|MURG_PSEAE	sp|Q9HW01|MURG_PSEAE	1	1	1	>sp|Q9HW01|MURG_PSEAE UDP-N-acetylglucosamine--N-acetylmuramyl-(pentapeptide) pyrophosphoryl-undecaprenol N-acetylglucosamine transferase OS=Pseudomonas aeruginosa (strain ATCC 15692 / PAO1 / 1C / PRS 101 / LMG 12228) GN=murG PE=1 SV=1	1	1	1	1	6.2	6.2	6.2	37.798	357	357	0	1.5223	10142000	1				115	1473	TRUE	1491	2700	5410	5410
sp|Q9HW02|MURC_PSEAE	sp|Q9HW02|MURC_PSEAE	2	2	2	>sp|Q9HW02|MURC_PSEAE UDP-N-acetylmuramate--L-alanine ligase OS=Pseudomonas aeruginosa (strain ATCC 15692 / PAO1 / 1C / PRS 101 / LMG 12228) GN=murC PE=3 SV=1	1	2	2	2	5	5	5	51.981	480	480	0	7.8851	19917000	3				116	654;1039	True;True	665;1052	1206;1917;1918	2619;3963;3964	2619;3963
sp|Q9HWC5|RL11_PSEAE	sp|Q9HWC5|RL11_PSEAE	2	2	2	>sp|Q9HWC5|RL11_PSEAE 50S ribosomal protein L11 OS=Pseudomonas aeruginosa (strain ATCC 15692 / PAO1 / 1C / PRS 101 / LMG 12228) GN=rplK PE=3 SV=1	1	2	2	2	23.8	23.8	23.8	14.907	143	143	0	13.057	46106000	3				117	1308;1580	True;True	1326;1598	2412;2413;2898	4912;4913;5789	4912;5789
sp|Q9HWC9|RPOC_PSEAE	sp|Q9HWC9|RPOC_PSEAE	47	47	47	>sp|Q9HWC9|RPOC_PSEAE DNA-directed RNA polymerase subunit beta OS=Pseudomonas aeruginosa (strain ATCC 15692 / PAO1 / 1C / PRS 101 / LMG 12228) GN=rpoC PE=3 SV=1	1	47	47	47	48.5	48.5	48.5	154.38	1399	1399	0	160.1	1867100000	164				118	35;142;146;212;284;295;333;386;394;417;430;450;473;563;571;580;630;655;708;770;785;793;866;981;1007;1016;1021;1074;1083;1119;1148;1165;1187;1283;1361;1414;1486;1496;1587;1618;1636;1689;1730;1736;1747;1790;1894	True;True;True;True;True;True;True;True;True;True;True;True;True;True;True;True;True;True;True;True;True;True;True;True;True;True;True;True;True;True;True;True;True;True;True;True;True;True;True;True;True;True;True;True;True;True;True	36;146;150;218;291;302;342;395;403;426;439;459;483;574;582;591;641;666;719;781;796;804;878;993;1019;1028;1033;1088;1097;1133;1163;1180;1202;1301;1379;1432;1504;1514;1606;1637;1655;1708;1749;1755;1766;1810;1914	57;58;262;263;264;265;271;393;530;531;550;551;552;553;638;639;730;731;743;786;787;808;809;838;884;885;1044;1056;1057;1072;1073;1074;1168;1169;1170;1207;1208;1299;1300;1407;1408;1430;1445;1446;1447;1579;1580;1581;1805;1806;1855;1856;1871;1872;1880;1881;1882;1981;1994;1995;2065;2066;2114;2143;2144;2185;2371;2372;2499;2500;2597;2598;2725;2745;2746;2912;2964;2965;2994;2995;3086;3156;3167;3168;3184;31…	97;98;715;716;717;718;719;720;721;722;723;724;725;726;727;728;729;730;731;732;741;929;1227;1228;1251;1252;1253;1254;1255;1256;1257;1258;1259;1260;1261;1262;1263;1264;1265;1266;1267;1268;1269;1270;1271;1272;1273;1274;1275;1586;1587;1588;1760;1761;1776;1873;1874;1905;1906;1907;1954;2038;2039;2040;2041;2042;2333;2348;2349;2350;2370;2371;2372;2561;2562;2563;2620;2621;2622;2623;2624;2800;2801;2992;299…	98;716;741;929;1227;1253;1587;1760;1776;1873;1905;1954;2039;2333;2348;2372;2562;2620;2800;2992;3022;3043;3327;3763;3854;3880;3894;4089;4102;4239;4333;4380;4441;4831;5053;5245;5463;5504;5810;5909;5970;6125;6234;6247;6270;6445;6834
sp|Q9HWD0|RS12_PSEAE	sp|Q9HWD0|RS12_PSEAE	1	1	1	>sp|Q9HWD0|RS12_PSEAE 30S ribosomal protein S12 OS=Pseudomonas aeruginosa (strain ATCC 15692 / PAO1 / 1C / PRS 101 / LMG 12228) GN=rpsL PE=3 SV=1	1	1	1	1	6.5	6.5	6.5	13.799	123	123	0.0029155	0.89467	28829000	3				119	217	TRUE	223	402;403	948;949;950	948
sp|Q9HWD2|EFG1_PSEAE;sp|Q9I244|EFG2_PSEAE	sp|Q9HWD2|EFG1_PSEAE	22;6	22;6	22;6	>sp|Q9HWD2|EFG1_PSEAE Elongation factor G 1 OS=Pseudomonas aeruginosa (strain ATCC 15692 / PAO1 / 1C / PRS 101 / LMG 12228) GN=fusA PE=1 SV=1	2	22	22	22	47	47	47	77.784	706	706;702	0	137.71	1465800000	120				120	68;79;223;373;527;618;629;644;681;684;704;729;923;979;1151;1252;1468;1651;1717;1836;1859;1897	True;True;True;True;True;True;True;True;True;True;True;True;True;True;True;True;True;True;True;True;True;True	71;82;229;382;538;629;640;655;692;695;715;740;935;991;1166;1269;1486;1670;1736;1856;1879;1917	128;129;130;151;152;415;706;707;708;985;986;1146;1166;1167;1190;1191;1249;1250;1251;1252;1255;1256;1293;1337;1338;1694;1695;1800;1801;1802;2119;2120;2318;2319;2691;2692;3017;3018;3135;3343;3344;3378;3379;3446;3447	344;345;346;347;348;349;350;351;352;353;406;407;408;409;410;970;1706;1707;1708;2237;2238;2523;2555;2556;2557;2558;2559;2560;2591;2592;2593;2686;2687;2688;2689;2690;2691;2692;2693;2694;2695;2696;2697;2698;2699;2700;2701;2702;2703;2704;2705;2706;2707;2708;2709;2710;2711;2712;2713;2716;2717;2718;2719;2720;2721;2794;2844;2845;2846;2847;2848;2849;2850;2851;3530;3531;3532;3745;3746;3747;3748;3749;3750;…	345;409;970;1708;2238;2523;2555;2592;2687;2720;2794;2844;3531;3749;4345;4721;5395;6000;6203;6580;6632;6839
sp|Q9HWD5|RL3_PSEAE	sp|Q9HWD5|RL3_PSEAE	4	4	4	>sp|Q9HWD5|RL3_PSEAE 50S ribosomal protein L3 OS=Pseudomonas aeruginosa (strain ATCC 15692 / PAO1 / 1C / PRS 101 / LMG 12228) GN=rplC PE=3 SV=1	1	4	4	4	27	27	27	22.591	211	211	0	13.887	161640000	16				121	243;557;761;1802	True;True;True;True	250;568;772;1822	452;453;1033;1034;1390;1391;3284;3285	1033;1034;1035;1036;1037;2317;2318;2968;2969;2970;2971;6484;6485;6486;6487;6488	1034;2317;2970;6486
sp|Q9HWD8|RL2_PSEAE	sp|Q9HWD8|RL2_PSEAE	7	7	7	>sp|Q9HWD8|RL2_PSEAE 50S ribosomal protein L2 OS=Pseudomonas aeruginosa (strain ATCC 15692 / PAO1 / 1C / PRS 101 / LMG 12228) GN=rplB PE=3 SV=1	1	7	7	7	31.5	31.5	31.5	29.579	273	273	0	24.868	371090000	20				122	218;377;668;670;712;1382;1822	True;True;True;True;True;True;True	224;386;679;681;723;1400;1842	404;405;406;407;713;714;1230;1231;1234;1308;1309;2538;2539;3319;3320	951;952;953;954;955;1713;1714;2661;2662;2663;2664;2665;2671;2811;2812;5120;5121;6542;6543;6544	953;1714;2662;2671;2812;5120;6544
sp|Q9HWE0|RL22_PSEAE	sp|Q9HWE0|RL22_PSEAE	1	1	1	>sp|Q9HWE0|RL22_PSEAE 50S ribosomal protein L22 OS=Pseudomonas aeruginosa (strain ATCC 15692 / PAO1 / 1C / PRS 101 / LMG 12228) GN=rplV PE=3 SV=1	1	1	1	1	11.8	11.8	11.8	11.911	110	110	0.0084746	0.69102	10733000	1				123	1669	TRUE	1688	3053	6063	6063
sp|Q9HWE1|RS3_PSEAE	sp|Q9HWE1|RS3_PSEAE	2	2	2	>sp|Q9HWE1|RS3_PSEAE 30S ribosomal protein S3 OS=Pseudomonas aeruginosa (strain ATCC 15692 / PAO1 / 1C / PRS 101 / LMG 12228) GN=rpsC PE=3 SV=1	1	2	2	2	11	11	11	25.838	228	228	0	2.13	19828000	1				124	1293;1353	True;True	1311;1371	2388;2488	4867;5034	4867;5034
sp|Q9HWE5|RL14_PSEAE	sp|Q9HWE5|RL14_PSEAE	4	4	4	>sp|Q9HWE5|RL14_PSEAE 50S ribosomal protein L14 OS=Pseudomonas aeruginosa (strain ATCC 15692 / PAO1 / 1C / PRS 101 / LMG 12228) GN=rplN PE=3 SV=1	1	4	4	4	36.9	36.9	36.9	13.412	122	122	0	22.493	183590000	15				125	478;757;1176;1860	True;True;True;True	488;768;1191;1880	894;895;1384;2163;2164;3380;3381	2056;2057;2058;2059;2060;2061;2062;2958;4409;4410;4411;4412;6634;6635;6636	2061;2958;4411;6635
sp|Q9HWE9|RS8_PSEAE	sp|Q9HWE9|RS8_PSEAE	3	3	3	>sp|Q9HWE9|RS8_PSEAE 30S ribosomal protein S8 OS=Pseudomonas aeruginosa (strain ATCC 15692 / PAO1 / 1C / PRS 101 / LMG 12228) GN=rpsH PE=3 SV=1	1	3	3	3	28.5	28.5	28.5	14.17	130	130	0	5.2303	65992000	6				126	596;1447;1873	True;True;True	607;1465;1893	1101;1102;2655;2656;3410	2419;2420;5340;5341;5342;6785	2419;5341;6785
sp|Q9HWF1|RL18_PSEAE	sp|Q9HWF1|RL18_PSEAE	1	1	1	>sp|Q9HWF1|RL18_PSEAE 50S ribosomal protein L18 OS=Pseudomonas aeruginosa (strain ATCC 15692 / PAO1 / 1C / PRS 101 / LMG 12228) GN=rplR PE=3 SV=1	1	1	1	1	9.5	9.5	9.5	12.661	116	116	0	2.1898	36774000	2				127	9	TRUE	10	16;17	20;21	21
sp|Q9HWF2|RS5_PSEAE	sp|Q9HWF2|RS5_PSEAE	5	5	5	>sp|Q9HWF2|RS5_PSEAE 30S ribosomal protein S5 OS=Pseudomonas aeruginosa (strain ATCC 15692 / PAO1 / 1C / PRS 101 / LMG 12228) GN=rpsE PE=3 SV=1	1	5	5	5	45.2	45.2	45.2	17.625	166	166	0	35.387	158000000	12				128	232;755;1270;1271;1834	True;True;True;True;True	238;766;1287;1288;1854	431;432;1381;2345;2346;2347;3338;3339;3340	995;996;997;998;2953;4765;4766;4767;6568;6569;6570;6571;6572	995;2953;4765;4766;6571
sp|Q9HWF3|RL30_PSEAE	sp|Q9HWF3|RL30_PSEAE	1	1	1	>sp|Q9HWF3|RL30_PSEAE 50S ribosomal protein L30 OS=Pseudomonas aeruginosa (strain ATCC 15692 / PAO1 / 1C / PRS 101 / LMG 12228) GN=rpmD PE=1 SV=3	1	1	1	1	24.1	24.1	24.1	6.4775	58	58	0	1.6003	3676900	3				129	824	TRUE	836	1496;1497	3127;3128;3129	3127
sp|Q9HWF7|RS13_PSEAE	sp|Q9HWF7|RS13_PSEAE	3	3	3	>sp|Q9HWF7|RS13_PSEAE 30S ribosomal protein S13 OS=Pseudomonas aeruginosa (strain ATCC 15692 / PAO1 / 1C / PRS 101 / LMG 12228) GN=rpsM PE=3 SV=1	1	3	3	3	19.5	19.5	19.5	13.265	118	118	0	8.946	114520000	8				130	302;720;791	True;True;True	311;731;802	578;1322;1323;1440;1441;1442;1443	1469;2825;2826;3035;3036;3037;3038;3039	1469;2826;3035
sp|Q9HWF8|RS11_PSEAE	sp|Q9HWF8|RS11_PSEAE	2	2	2	>sp|Q9HWF8|RS11_PSEAE 30S ribosomal protein S11 OS=Pseudomonas aeruginosa (strain ATCC 15692 / PAO1 / 1C / PRS 101 / LMG 12228) GN=rpsK PE=3 SV=1	1	2	2	2	20.9	20.9	20.9	13.629	129	129	0	4.9804	33069000	2				131	92;1327	True;True	95;1345	170;2445	461;4963	461;4963
sp|Q9HWG0|UVRA_PSEAE	sp|Q9HWG0|UVRA_PSEAE	3	3	3	>sp|Q9HWG0|UVRA_PSEAE UvrABC system protein A OS=Pseudomonas aeruginosa (strain ATCC 15692 / PAO1 / 1C / PRS 101 / LMG 12228) GN=uvrA PE=3 SV=1	1	3	3	3	4.6	4.6	4.6	104.49	945	945	0	8.1698	26255000	6				132	989;1480;1821	True;True;True	1001;1498;1841	1819;1820;2716;3317;3318	3781;3782;5445;5446;6540;6541	3782;5445;6541
sp|Q9HWX4|RIBB_PSEAE	sp|Q9HWX4|RIBB_PSEAE	2	2	2	>sp|Q9HWX4|RIBB_PSEAE 3,4-dihydroxy-2-butanone 4-phosphate synthase OS=Pseudomonas aeruginosa (strain ATCC 15692 / PAO1 / 1C / PRS 101 / LMG 12228) GN=ribB PE=3 SV=1	1	2	2	2	6.6	6.6	6.6	39.438	365	365	0	2.8558	10961000	2				133	150;392	True;True	154;401	277;740	748;1772	748;1772
sp|Q9HX20|PROA_PSEAE	sp|Q9HX20|PROA_PSEAE	1	1	1	>sp|Q9HX20|PROA_PSEAE Gamma-glutamyl phosphate reductase OS=Pseudomonas aeruginosa (strain ATCC 15692 / PAO1 / 1C / PRS 101 / LMG 12228) GN=proA PE=3 SV=1	1	1	1	1	3.6	3.6	3.6	45.044	421	421	0	1.3416	1372300	1				134	59	TRUE	62	117	326	326
sp|Q9HX33|SYL_PSEAE	sp|Q9HX33|SYL_PSEAE	8	8	8	>sp|Q9HX33|SYL_PSEAE Leucine--tRNA ligase OS=Pseudomonas aeruginosa (strain ATCC 15692 / PAO1 / 1C / PRS 101 / LMG 12228) GN=leuS PE=3 SV=1	1	8	8	8	14.7	14.7	14.7	97.647	873	873	0	34.103	71334000	18				135	340;520;600;604;853;1261;1276;1867	True;True;True;True;True;True;True;True	349;530;611;615;865;1278;1293;1887	649;650;969;970;971;972;1108;1109;1117;1118;1119;1551;2331;2332;2354;3392	1603;1604;2201;2202;2203;2204;2205;2206;2207;2432;2433;2445;2446;2447;2448;2449;3271;3272;4737;4738;4779;6650	1603;2202;2432;2446;3272;4737;4779;6650
sp|Q9HXE5|RHLB_PSEAE	sp|Q9HXE5|RHLB_PSEAE	2	2	2	>sp|Q9HXE5|RHLB_PSEAE ATP-dependent RNA helicase RhlB OS=Pseudomonas aeruginosa (strain ATCC 15692 / PAO1 / 1C / PRS 101 / LMG 12228) GN=rhlB PE=3 SV=1	1	2	2	2	9.1	9.1	9.1	44.287	397	397	0.0029762	0.97788	9999600	2				136	78;421	True;True	81;430	150;792	405;1879	405;1879
sp|Q9HXH0|SYV_PSEAE	sp|Q9HXH0|SYV_PSEAE	2	2	2	>sp|Q9HXH0|SYV_PSEAE Valine--tRNA ligase OS=Pseudomonas aeruginosa (strain ATCC 15692 / PAO1 / 1C / PRS 101 / LMG 12228) GN=valS PE=1 SV=1	1	2	2	2	5.5	5.5	5.5	107.71	950	950	0	9.819	22826000	6				137	647;1715	True;True	658;1734	1195;1196;3132;3133	2598;2599;6198;6199;6200;6201	2598;6200
sp|Q9HXI8|ISCS_PSEAE	sp|Q9HXI8|ISCS_PSEAE	3	3	3	>sp|Q9HXI8|ISCS_PSEAE Cysteine desulfurase IscS OS=Pseudomonas aeruginosa (strain ATCC 15692 / PAO1 / 1C / PRS 101 / LMG 12228) GN=iscS PE=3 SV=1	1	3	3	3	9.2	9.2	9.2	44.666	404	404	0	3.5765	20221000	2				138	389;613;1064	True;True;True	398;624;1078	735;1137;1963	1766;2501;4047	1766;2501;4047
sp|Q9HXJ4|ISPG_PSEAE	sp|Q9HXJ4|ISPG_PSEAE	2	2	2	>sp|Q9HXJ4|ISPG_PSEAE 4-hydroxy-3-methylbut-2-en-1-yl diphosphate synthase (flavodoxin) OS=Pseudomonas aeruginosa (strain ATCC 15692 / PAO1 / 1C / PRS 101 / LMG 12228) GN=ispG PE=3 SV=1	1	2	2	2	8.9	8.9	8.9	40.056	371	371	0	8.5249	25063000	2				139	1388;1877	True;True	1406;1897	2550;2551;3415	5139;5140;6790	5140;6790
sp|Q9HXJ5|SYH_PSEAE	sp|Q9HXJ5|SYH_PSEAE	1	1	1	>sp|Q9HXJ5|SYH_PSEAE Histidine--tRNA ligase OS=Pseudomonas aeruginosa (strain ATCC 15692 / PAO1 / 1C / PRS 101 / LMG 12228) GN=hisS PE=3 SV=1	1	1	1	1	2.8	2.8	2.8	47.512	429	429	0.0029499	0.9405	2012100	0				140	1062	TRUE	1076	1960	4041	4041
sp|Q9HXK5|LEU1_PSEAE	sp|Q9HXK5|LEU1_PSEAE	1	1	1	>sp|Q9HXK5|LEU1_PSEAE 2-isopropylmalate synthase OS=Pseudomonas aeruginosa (strain ATCC 15692 / PAO1 / 1C / PRS 101 / LMG 12228) GN=leuA PE=3 SV=2	1	1	1	1	2.2	2.2	2.2	61.726	556	556	0	1.1158	5505100	1				141	1330	TRUE	1348	2450	4969	4969
sp|Q9HXM6|GUAA_PSEAE	sp|Q9HXM6|GUAA_PSEAE	7	7	7	>sp|Q9HXM6|GUAA_PSEAE GMP synthase [glutamine-hydrolyzing] OS=Pseudomonas aeruginosa (strain ATCC 15692 / PAO1 / 1C / PRS 101 / LMG 12228) GN=guaA PE=3 SV=1	1	7	7	7	18.7	18.7	18.7	57.959	525	525	0	16.39	134210000	11				142	184;501;771;786;1731;1803;1837	True;True;True;True;True;True;True	188;511;782;797;1750;1823;1857	335;336;933;934;1409;1410;1431;1432;3157;3286;3345	843;844;2136;2137;2999;3000;3023;3024;6235;6489;6582	844;2136;2999;3023;6235;6489;6582
sp|Q9HXN2|PUR4_PSEAE	sp|Q9HXN2|PUR4_PSEAE	10	10	10	>sp|Q9HXN2|PUR4_PSEAE Phosphoribosylformylglycinamidine synthase OS=Pseudomonas aeruginosa (strain ATCC 15692 / PAO1 / 1C / PRS 101 / LMG 12228) GN=purL PE=3 SV=1	1	10	10	10	11.3	11.3	11.3	140.65	1298	1298	0	23.817	109570000	18				143	173;239;268;310;959;1147;1280;1303;1491;1796	True;True;True;True;True;True;True;True;True;True	177;245;275;319;971;1162;1298;1321;1509;1816	315;316;317;318;444;502;594;1754;2113;2363;2403;2404;2735;2736;3269;3270	814;815;816;817;818;819;1020;1176;1512;3634;4332;4811;4897;4898;5477;5478;6458;6459;6460	817;1020;1176;1512;3634;4332;4811;4897;5477;6458
sp|Q9HXZ1|DPO3A_PSEAE	sp|Q9HXZ1|DPO3A_PSEAE	2	2	2	>sp|Q9HXZ1|DPO3A_PSEAE DNA polymerase III subunit alpha OS=Pseudomonas aeruginosa (strain ATCC 15692 / PAO1 / 1C / PRS 101 / LMG 12228) GN=dnaE PE=3 SV=1	1	2	2	2	3.7	3.7	3.7	130.9	1173	1173	0	5.6747	9739200	4				144	233;1456	True;True	239;1474	433;434;2672	999;1000;1001;5367	1001;5367
sp|Q9HXZ2|ACCA_PSEAE	sp|Q9HXZ2|ACCA_PSEAE	3	3	3	>sp|Q9HXZ2|ACCA_PSEAE Acetyl-coenzyme A carboxylase carboxyl transferase subunit alpha OS=Pseudomonas aeruginosa (strain ATCC 15692 / PAO1 / 1C / PRS 101 / LMG 12228) GN=accA PE=1 SV=1	1	3	3	3	15.5	15.5	15.5	34.947	316	316	0	13.07	33355000	3				145	157;1115;1188	True;True;True	161;1129;1203	287;2056;2186	761;4229;4442	761;4229;4442
sp|Q9HXZ4|PYRG_PSEAE	sp|Q9HXZ4|PYRG_PSEAE	13	13	13	>sp|Q9HXZ4|PYRG_PSEAE CTP synthase OS=Pseudomonas aeruginosa (strain ATCC 15692 / PAO1 / 1C / PRS 101 / LMG 12228) GN=pyrG PE=3 SV=1	1	13	13	13	36.9	36.9	36.9	59.617	542	542	0	23.534	189890000	31				146	547;608;725;839;850;1291;1438;1467;1518;1596;1833;1887;1904	True;True;True;True;True;True;True;True;True;True;True;True;True	558;619;736;851;862;1309;1456;1485;1536;1615;1853;1907;1924	1014;1015;1016;1017;1124;1330;1331;1527;1528;1545;2386;2641;2690;2784;2785;2930;2931;3337;3430;3431;3432;3458	2280;2281;2282;2283;2284;2285;2286;2287;2288;2289;2462;2834;2835;3221;3222;3247;4865;5308;5393;5394;5579;5580;5855;5856;6567;6812;6813;6814;6815;6816;6817;6861	2285;2462;2834;3222;3247;4865;5308;5394;5579;5855;6567;6816;6861
sp|Q9HXZ5|ENO_PSEAE	sp|Q9HXZ5|ENO_PSEAE	5	5	5	>sp|Q9HXZ5|ENO_PSEAE Enolase OS=Pseudomonas aeruginosa (strain ATCC 15692 / PAO1 / 1C / PRS 101 / LMG 12228) GN=eno PE=3 SV=1	1	5	5	5	24	24	24	45.195	429	429	0	35.367	92275000	10				147	519;632;1415;1657;1776	True;True;True;True;True	529;643;1433;1676;1796	967;968;1173;2599;3025;3026;3238;3239	2199;2200;2568;2569;2570;5246;6008;6009;6411;6412	2199;2569;5246;6009;6412
sp|Q9HY84|ASSY_PSEAE	sp|Q9HY84|ASSY_PSEAE	1	1	1	>sp|Q9HY84|ASSY_PSEAE Argininosuccinate synthase OS=Pseudomonas aeruginosa (strain ATCC 15692 / PAO1 / 1C / PRS 101 / LMG 12228) GN=argG PE=3 SV=1	1	1	1	1	4.2	4.2	4.2	45.297	405	405	0	10.795	6008900	1				148	171	TRUE	175	312	811	811
sp|Q9HYA4|ASPD_PSEAE	sp|Q9HYA4|ASPD_PSEAE	1	1	1	>sp|Q9HYA4|ASPD_PSEAE Probable L-aspartate dehydrogenase OS=Pseudomonas aeruginosa (strain ATCC 15692 / PAO1 / 1C / PRS 101 / LMG 12228) GN=nadX PE=3 SV=1	1	1	1	1	3.4	3.4	3.4	27.92	267	267	0.0085714	0.72619	17335000	1				149	926	TRUE	938	1700	3549	3549
sp|Q9HYC7|SYM_PSEAE	sp|Q9HYC7|SYM_PSEAE	4	4	4	>sp|Q9HYC7|SYM_PSEAE Methionine--tRNA ligase OS=Pseudomonas aeruginosa (strain ATCC 15692 / PAO1 / 1C / PRS 101 / LMG 12228) GN=metG PE=3 SV=1	1	4	4	4	8.4	8.4	8.4	74.903	677	677	0	14.027	42575000	5				150	385;642;672;1088	True;True;True;True	394;653;683;1102	729;1187;1188;1236;2004	1759;2588;2589;2673;4121	1759;2589;2673;4121
sp|Q9HYD5|MAO1_PSEAE	sp|Q9HYD5|MAO1_PSEAE	4	4	4	>sp|Q9HYD5|MAO1_PSEAE NAD-dependent malic enzyme OS=Pseudomonas aeruginosa (strain ATCC 15692 / PAO1 / 1C / PRS 101 / LMG 12228) GN=maeA PE=3 SV=1	1	4	4	4	11	11	11	62.42	564	564	0	4.8072	25843000	4				151	626;805;1787;1843	True;True;True;True	637;816;1807;1863	1161;1460;3257;3356	2550;3067;6441;6597	2550;3067;6441;6597
sp|Q9HYQ8|HLDD_PSEAE	sp|Q9HYQ8|HLDD_PSEAE	1	1	1	>sp|Q9HYQ8|HLDD_PSEAE ADP-L-glycero-D-manno-heptose-6-epimerase OS=Pseudomonas aeruginosa (strain ATCC 15692 / PAO1 / 1C / PRS 101 / LMG 12228) GN=hldD PE=3 SV=2	1	1	1	1	5.8	5.8	5.8	37.188	330	330	0	7.993	8207700	1				152	1258	TRUE	1275	2327	4733	4733
sp|Q9HYR2|FABH_PSEAE	sp|Q9HYR2|FABH_PSEAE	3	3	3	>sp|Q9HYR2|FABH_PSEAE 3-oxoacyl-[acyl-carrier-protein] synthase 3 OS=Pseudomonas aeruginosa (strain ATCC 15692 / PAO1 / 1C / PRS 101 / LMG 12228) GN=fabH PE=1 SV=1	1	3	3	3	13	13	13	34.003	330	330	0	6.8096	32336000	4				153	21;228;797	True;True;True	22;234;808	36;37;423;1451	57;58;984;3049	57;984;3049
sp|Q9HYX7|RDGC_PSEAE	sp|Q9HYX7|RDGC_PSEAE	2	2	2	>sp|Q9HYX7|RDGC_PSEAE Recombination-associated protein RdgC OS=Pseudomonas aeruginosa (strain ATCC 15692 / PAO1 / 1C / PRS 101 / LMG 12228) GN=rdgC PE=1 SV=1	1	2	2	2	6.5	6.5	6.5	34.015	306	306	0.0029412	0.92367	5400200	1				154	886;1633	True;True	898;1652	1619;2987	3399;5961	3399;5961
sp|Q9HZ66|SERC_PSEAE	sp|Q9HZ66|SERC_PSEAE	4	4	4	>sp|Q9HZ66|SERC_PSEAE Phosphoserine aminotransferase OS=Pseudomonas aeruginosa (strain ATCC 15692 / PAO1 / 1C / PRS 101 / LMG 12228) GN=serC PE=1 SV=1	1	4	4	4	11.9	11.9	11.9	39.949	361	361	0	4.7393	43465000	6				155	187;439;939;1883	True;True;True;True	191;448;951;1903	343;344;823;1722;1723;3424;3425	861;862;1938;3586;3587;6805;6806	862;1938;3587;6805
sp|Q9HZ71|RS1_PSEAE	sp|Q9HZ71|RS1_PSEAE	14	14	14	>sp|Q9HZ71|RS1_PSEAE 30S ribosomal protein S1 OS=Pseudomonas aeruginosa (strain ATCC 15692 / PAO1 / 1C / PRS 101 / LMG 12228) GN=rpsA PE=3 SV=1	1	14	14	14	34.7	34.7	34.7	61.869	559	559	0	58.156	854590000	43				156	76;355;556;592;896;1322;1342;1347;1400;1404;1454;1487;1667;1824	True;True;True;True;True;True;True;True;True;True;True;True;True;True	79;364;567;603;908;1340;1360;1365;1418;1422;1472;1505;1686;1844	146;147;148;673;674;1030;1031;1032;1096;1638;1639;2439;2471;2472;2478;2479;2574;2579;2580;2669;2726;2727;3046;3047;3048;3322	400;401;402;403;1650;1651;1652;1653;2310;2311;2312;2313;2314;2315;2316;2409;3424;3425;4957;5005;5006;5007;5019;5020;5021;5022;5023;5024;5190;5191;5192;5193;5199;5200;5201;5202;5203;5360;5464;5465;6040;6041;6042;6546;6547;6548	403;1653;2314;2409;3424;4957;5005;5023;5191;5202;5360;5464;6040;6548
sp|Q9HZ76|WBPE_PSEAE	sp|Q9HZ76|WBPE_PSEAE	8	8	8	>sp|Q9HZ76|WBPE_PSEAE UDP-2-acetamido-2-deoxy-3-oxo-D-glucuronate aminotransferase OS=Pseudomonas aeruginosa (strain ATCC 15692 / PAO1 / 1C / PRS 101 / LMG 12228) GN=wbpE PE=1 SV=1	1	8	8	8	28.1	28.1	28.1	38.924	359	359	0	23.018	245460000	21				157	25;902;944;1175;1307;1611;1614;1880	True;True;True;True;True;True;True;True	26;914;956;1190;1325;1630;1633;1900	43;1650;1729;1730;2161;2162;2411;2952;2953;2957;3419;3420	77;3442;3594;3595;3596;3597;4407;4408;4911;5885;5886;5887;5888;5892;5893;6795;6796;6797;6798;6799;6800	77;3442;3596;4407;4911;5885;5892;6796
sp|Q9HZA7|ACCD_PSEAE	sp|Q9HZA7|ACCD_PSEAE	3	3	3	>sp|Q9HZA7|ACCD_PSEAE Acetyl-coenzyme A carboxylase carboxyl transferase subunit beta OS=Pseudomonas aeruginosa (strain ATCC 15692 / PAO1 / 1C / PRS 101 / LMG 12228) GN=accD PE=1 SV=1	1	3	3	3	13.4	13.4	13.4	31.843	290	290	0	7.0693	49030000	5				158	138;920;1207	True;True;True	142;932;1222	257;1687;1688;2220;2221	708;3519;3520;4504;4505	708;3519;4504
sp|Q9HZE0|DHE2_PSEAE	sp|Q9HZE0|DHE2_PSEAE	54	54	54	>sp|Q9HZE0|DHE2_PSEAE NAD-specific glutamate dehydrogenase OS=Pseudomonas aeruginosa (strain ATCC 15692 / PAO1 / 1C / PRS 101 / LMG 12228) GN=gdhB PE=1 SV=1	1	54	54	54	44.8	44.8	44.8	182.64	1620	1620	0	219.88	2927100000	274				159	22;109;116;131;186;261;262;307;311;352;379;400;404;415;431;479;663;666;701;705;733;758;809;841;842;922;956;975;1008;1014;1033;1043;1123;1139;1210;1214;1235;1334;1362;1408;1425;1444;1471;1495;1524;1569;1674;1686;1722;1800;1812;1835;1870;1909	True;True;True;True;True;True;True;True;True;True;True;True;True;True;True;True;True;True;True;True;True;True;True;True;True;True;True;True;True;True;True;True;True;True;True;True;True;True;True;True;True;True;True;True;True;True;True;True;True;True;True;True;True;True	23;113;120;135;190;268;269;316;320;361;388;409;413;424;440;489;674;677;712;716;744;769;820;853;854;934;968;987;1020;1026;1045;1056;1137;1153;1225;1230;1252;1352;1380;1426;1443;1462;1489;1513;1542;1587;1693;1705;1741;1820;1832;1855;1890;1929	38;39;208;209;220;221;244;245;339;340;341;342;485;486;487;488;489;490;491;589;590;595;596;668;718;719;752;753;754;760;761;783;810;811;896;897;1221;1222;1223;1227;1228;1289;1294;1295;1342;1385;1386;1465;1466;1531;1532;1533;1690;1691;1692;1693;1747;1748;1749;1750;1789;1790;1791;1792;1857;1858;1868;1903;1904;1924;1925;2071;2072;2097;2098;2228;2229;2237;2238;2290;2291;2457;2458;2459;2501;2587;2616;26…	59;60;61;62;634;635;636;637;638;652;653;654;686;687;688;689;690;691;692;849;850;851;852;853;854;855;856;857;858;859;860;1095;1096;1097;1098;1099;1100;1101;1102;1103;1104;1105;1106;1107;1108;1109;1110;1111;1112;1113;1114;1115;1116;1117;1118;1119;1120;1121;1122;1123;1124;1125;1126;1127;1128;1129;1130;1131;1132;1133;1134;1135;1136;1137;1138;1139;1140;1141;1142;1143;1144;1145;1146;1506;1507;1508;1513…	61;635;653;687;851;1096;1146;1506;1516;1643;1727;1792;1811;1869;1908;2063;2645;2654;2788;2795;2856;2961;3079;3229;3230;3529;3617;3722;3859;3873;3935;3975;4246;4288;4516;4529;4678;4982;5054;5218;5270;5333;5405;5502;5599;5760;6076;6120;6211;6477;6520;6573;6778;6871
sp|Q9HZF8|PYRD_PSEAE	sp|Q9HZF8|PYRD_PSEAE	1	1	1	>sp|Q9HZF8|PYRD_PSEAE Dihydroorotate dehydrogenase (quinone) OS=Pseudomonas aeruginosa (strain ATCC 15692 / PAO1 / 1C / PRS 101 / LMG 12228) GN=pyrD PE=3 SV=1	1	1	1	1	9.9	9.9	9.9	36.128	342	342	0.0029851	0.99604	3516400	4				160	726	TRUE	737	1332;1333	2836;2837;2838;2839	2836
sp|Q9HZJ2|FADB_PSEAE	sp|Q9HZJ2|FADB_PSEAE	9	9	9	>sp|Q9HZJ2|FADB_PSEAE Fatty acid oxidation complex subunit alpha OS=Pseudomonas aeruginosa (strain ATCC 15692 / PAO1 / 1C / PRS 101 / LMG 12228) GN=fadB PE=3 SV=1	1	9	9	9	17.9	17.9	17.9	76.953	715	715	0	38.105	241600000	24				161	133;588;982;1041;1099;1532;1590;1664;1721	True;True;True;True;True;True;True;True;True	137;599;994;1054;1113;1550;1609;1683;1740	248;1087;1807;1808;1920;1921;2021;2819;2917;2918;2919;2920;3039;3040;3041;3140;3141	697;2397;3766;3767;3967;3968;4157;5673;5815;5816;5817;5818;5819;5820;5821;5822;5823;5824;5825;5826;6030;6031;6032;6209;6210	697;2397;3766;3967;4157;5673;5815;6032;6209
sp|Q9HZJ3|FADA_PSEAE	sp|Q9HZJ3|FADA_PSEAE	4	4	4	>sp|Q9HZJ3|FADA_PSEAE 3-ketoacyl-CoA thiolase OS=Pseudomonas aeruginosa (strain ATCC 15692 / PAO1 / 1C / PRS 101 / LMG 12228) GN=fadA PE=3 SV=1	1	4	4	4	16.1	16.1	16.1	41.643	391	391	0	9.8171	95998000	8				162	90;189;206;845	True;True;True;True	93;193;212;857	168;346;347;382;383;1537;1538	458;459;864;865;917;918;3238;3239	458;865;917;3239
sp|Q9HZP5|ETFD_PSEAE	sp|Q9HZP5|ETFD_PSEAE	3	3	3	>sp|Q9HZP5|ETFD_PSEAE Electron transfer flavoprotein-ubiquinone oxidoreductase OS=Pseudomonas aeruginosa (strain ATCC 15692 / PAO1 / 1C / PRS 101 / LMG 12228) GN=PA2953 PE=1 SV=1	1	3	3	3	9.1	9.1	9.1	59.928	551	551	0	7.2744	54837000	7				163	380;409;1420	True;True;True	389;418;1438	720;769;770;2607;2608	1730;1828;1829;1830;1831;5259;5260	1730;1831;5260
sp|Q9HZP6|ETFB_PSEAE	sp|Q9HZP6|ETFB_PSEAE	2	2	2	>sp|Q9HZP6|ETFB_PSEAE Electron transfer flavoprotein subunit beta OS=Pseudomonas aeruginosa (strain ATCC 15692 / PAO1 / 1C / PRS 101 / LMG 12228) GN=etfB PE=3 SV=1	1	2	2	2	15.7	15.7	15.7	26.376	249	249	0	3.9663	37181000	5				164	112;393	True;True	116;402	212;741;742	641;642;1773;1774;1775	642;1774
sp|Q9HZZ2|EFP_PSEAE	sp|Q9HZZ2|EFP_PSEAE	5	5	5	>sp|Q9HZZ2|EFP_PSEAE Elongation factor P OS=Pseudomonas aeruginosa (strain ATCC 15692 / PAO1 / 1C / PRS 101 / LMG 12228) GN=efp PE=1 SV=1	1	5	5	5	33.5	33.5	33.5	20.985	188	188	0	11.795	81480000	7				165	32;94;1260;1332;1699	True;True;True;True;True	33;97;1277;1350;1718	53;172;2329;2330;2454;3104;3105	92;463;4735;4736;4979;6147;6148	92;463;4736;4979;6148
sp|Q9I047|TAL_PSEAE	sp|Q9I047|TAL_PSEAE	1	1	1	>sp|Q9I047|TAL_PSEAE Transaldolase OS=Pseudomonas aeruginosa (strain ATCC 15692 / PAO1 / 1C / PRS 101 / LMG 12228) GN=tal PE=3 SV=1	1	1	1	1	4.9	4.9	4.9	33.946	307	307	0	4.6027	4102100	1				166	342	TRUE	351	653	1609	1609
sp|Q9I099|SYT_PSEAE	sp|Q9I099|SYT_PSEAE	2	2	2	>sp|Q9I099|SYT_PSEAE Threonine--tRNA ligase OS=Pseudomonas aeruginosa (strain ATCC 15692 / PAO1 / 1C / PRS 101 / LMG 12228) GN=thrS PE=3 SV=1	1	2	2	2	4.8	4.8	4.8	73.079	640	640	0	2.3605	14127000	8				167	378;803	True;True	387;814	715;716;717;1458	1715;1716;1717;1718;1719;1720;1721;3065	1720;3065
sp|Q9I0A2|RL20_PSEAE	sp|Q9I0A2|RL20_PSEAE	1	1	1	>sp|Q9I0A2|RL20_PSEAE 50S ribosomal protein L20 OS=Pseudomonas aeruginosa (strain ATCC 15692 / PAO1 / 1C / PRS 101 / LMG 12228) GN=rplT PE=3 SV=1	1	1	1	1	8.5	8.5	8.5	13.365	118	118	0.003012	1.0847	2825900	1				168	1706	TRUE	1725	3117	6167	6167
sp|Q9I0A3|SYFA_PSEAE	sp|Q9I0A3|SYFA_PSEAE	3	3	3	>sp|Q9I0A3|SYFA_PSEAE Phenylalanine--tRNA ligase alpha subunit OS=Pseudomonas aeruginosa (strain ATCC 15692 / PAO1 / 1C / PRS 101 / LMG 12228) GN=pheS PE=1 SV=1	1	3	3	3	9.8	9.8	9.8	38.063	338	338	0	8.7626	14490000	4				169	1159;1565;1885	True;True;True	1174;1583;1905	2131;2132;2875;3428	4362;4363;5756;6810	4362;5756;6810
sp|Q9I0A4|SYFB_PSEAE	sp|Q9I0A4|SYFB_PSEAE	5	5	5	>sp|Q9I0A4|SYFB_PSEAE Phenylalanine--tRNA ligase beta subunit OS=Pseudomonas aeruginosa (strain ATCC 15692 / PAO1 / 1C / PRS 101 / LMG 12228) GN=pheT PE=1 SV=1	1	5	5	5	10.7	10.7	10.7	86.799	792	792	0	9.8014	62792000	5				170	288;833;1004;1117;1121	True;True;True;True;True	295;845;1016;1131;1135	538;1519;1520;1851;2059;2068;2069	1235;1236;3208;3209;3847;4232;4243;4244	1235;3208;3847;4232;4243
sp|Q9I0H4|HMP_PSEAE	sp|Q9I0H4|HMP_PSEAE	1	1	1	>sp|Q9I0H4|HMP_PSEAE Flavohemoprotein OS=Pseudomonas aeruginosa (strain ATCC 15692 / PAO1 / 1C / PRS 101 / LMG 12228) GN=hmp PE=3 SV=1	1	1	1	1	4.8	4.8	4.8	43.658	393	393	0	1.372	5397900	1				171	1619	TRUE	1638	2966	5912	5912
sp|Q9I0J5|NUOH_PSEAE	sp|Q9I0J5|NUOH_PSEAE	1	1	1	>sp|Q9I0J5|NUOH_PSEAE NADH-quinone oxidoreductase subunit H OS=Pseudomonas aeruginosa (strain ATCC 15692 / PAO1 / 1C / PRS 101 / LMG 12228) GN=nuoH PE=3 SV=1	1	1	1	1	4.5	4.5	4.5	36.743	331	331	0	4.8806	37773000	4				172	1677	TRUE	1696	3065;3066	6083;6084;6085;6086	6084
sp|Q9I0J6|NUOG_PSEAE	sp|Q9I0J6|NUOG_PSEAE	18	18	18	>sp|Q9I0J6|NUOG_PSEAE NADH-quinone oxidoreductase subunit G OS=Pseudomonas aeruginosa (strain ATCC 15692 / PAO1 / 1C / PRS 101 / LMG 12228) GN=nuoG PE=3 SV=1	1	18	18	18	31.4	31.4	31.4	98.999	905	905	0	70.475	566040000	48				173	103;137;210;343;420;484;495;524;570;832;935;974;995;1006;1087;1638;1779;1816	True;True;True;True;True;True;True;True;True;True;True;True;True;True;True;True;True;True	106;141;216;352;429;494;505;535;581;844;947;986;1007;1018;1101;1657;1799;1836	189;190;255;256;389;390;654;791;904;905;923;924;981;1054;1055;1517;1518;1715;1788;1830;1853;1854;2000;2001;2002;2003;2998;2999;3243;3244;3306;3307;3308;3309	495;496;706;707;924;925;926;1610;1611;1878;2072;2073;2074;2117;2118;2231;2344;2345;2346;2347;3206;3207;3579;3714;3796;3849;3850;3851;3852;4112;4113;4114;4115;4116;4117;4118;4119;4120;5973;5974;5975;5976;6418;6419;6526;6527;6528;6529	496;706;924;1610;1878;2074;2118;2231;2344;3206;3579;3714;3796;3849;4112;5976;6418;6527
sp|Q9I0J7|NUOF_PSEAE	sp|Q9I0J7|NUOF_PSEAE	7	7	7	>sp|Q9I0J7|NUOF_PSEAE NADH-quinone oxidoreductase subunit F OS=Pseudomonas aeruginosa (strain ATCC 15692 / PAO1 / 1C / PRS 101 / LMG 12228) GN=nuoF PE=3 SV=1	1	7	7	7	26.3	26.3	26.3	48.678	448	448	0	31.419	129850000	16				174	52;159;246;572;1169;1278;1563	True;True;True;True;True;True;True	55;163;253;583;1184;1295;1581	105;106;289;290;459;1058;1059;1060;1061;2150;2151;2152;2357;2872	310;311;763;764;1051;2351;2352;2353;2354;2355;4390;4391;4392;4393;4394;4395;4783;5752	311;764;1051;2353;4390;4783;5752
sp|Q9I0J9|NUOCD_PSEAE	sp|Q9I0J9|NUOCD_PSEAE	9	9	9	>sp|Q9I0J9|NUOCD_PSEAE NADH-quinone oxidoreductase subunit C/D OS=Pseudomonas aeruginosa (strain ATCC 15692 / PAO1 / 1C / PRS 101 / LMG 12228) GN=nuoC PE=3 SV=1	1	9	9	9	17.4	17.4	17.4	68.322	593	593	0	22.25	207070000	22				175	33;299;354;374;485;741;1318;1535;1541	True;True;True;True;True;True;True;True;True	34;308;363;383;495;752;1336;1553;1559	54;574;671;672;709;906;907;1355;1356;2431;2432;2823;2824;2834	93;1464;1646;1647;1648;1649;1709;2075;2076;2872;2873;2874;2875;2876;2877;2878;2879;4942;4943;5679;5680;5692	93;1464;1647;1709;2076;2877;4942;5680;5692
sp|Q9I0K0|NUOB_PSEAE	sp|Q9I0K0|NUOB_PSEAE	1	1	1	>sp|Q9I0K0|NUOB_PSEAE NADH-quinone oxidoreductase subunit B OS=Pseudomonas aeruginosa (strain ATCC 15692 / PAO1 / 1C / PRS 101 / LMG 12228) GN=nuoB PE=3 SV=1	1	1	1	1	6.7	6.7	6.7	25.425	225	225	0	5.1098	8191400	1				176	736	TRUE	747	1347	2863	2863
sp|Q9I0K4|ACEA_PSEAE	sp|Q9I0K4|ACEA_PSEAE	14	14	14	>sp|Q9I0K4|ACEA_PSEAE Isocitrate lyase OS=Pseudomonas aeruginosa (strain ATCC 15692 / PAO1 / 1C / PRS 101 / LMG 12228) GN=PA2634 PE=1 SV=1	1	14	14	14	36	36	36	58.886	531	531	0	58.34	544120000	70				177	312;351;406;693;927;1037;1133;1250;1357;1391;1392;1513;1801;1912	True;True;True;True;True;True;True;True;True;True;True;True;True;True	321;360;415;704;939;1050;1147;1267;1375;1409;1410;1531;1821;1932	597;666;667;764;765;766;1273;1274;1701;1702;1913;1914;2087;2088;2314;2315;2493;2494;2558;2559;2560;2775;2776;2777;3281;3282;3283;3470	1520;1640;1641;1642;1816;1817;1818;1819;1820;1821;1822;1823;1824;1825;2754;2755;2756;3550;3551;3552;3553;3554;3954;3955;3956;3957;3958;4268;4269;4270;4271;4272;4273;4711;4712;4713;5042;5043;5044;5045;5046;5150;5151;5152;5551;5552;5553;5554;5555;5556;5557;5558;5559;5560;5561;5562;5563;5564;5565;5566;5567;5568;5569;5570;5571;6479;6480;6481;6482;6483;6875	1520;1641;1823;2755;3551;3957;4271;4713;5045;5150;5152;5552;6479;6875
sp|Q9I0Q0|PQSH_PSEAE	sp|Q9I0Q0|PQSH_PSEAE	1	1	1	>sp|Q9I0Q0|PQSH_PSEAE 2-heptyl-3-hydroxy-4(1H)-quinolone synthase OS=Pseudomonas aeruginosa (strain ATCC 15692 / PAO1 / 1C / PRS 101 / LMG 12228) GN=pqsH PE=3 SV=1	1	1	1	1	4.2	4.2	4.2	42.081	382	382	0	1.7163	7729100	1				178	1682	TRUE	1701	3076	6115	6115
sp|Q9I137|GCSP1_PSEAE	sp|Q9I137|GCSP1_PSEAE	3	3	3	>sp|Q9I137|GCSP1_PSEAE Glycine dehydrogenase (decarboxylating) 1 OS=Pseudomonas aeruginosa (strain ATCC 15692 / PAO1 / 1C / PRS 101 / LMG 12228) GN=gcvP1 PE=3 SV=1	1	3	3	3	5.6	5.6	5.6	103.92	959	959	0	17.245	43897000	4				179	434;659;996	True;True;True	443;670;1008	817;1216;1831;1832	1931;2637;3797;3798;3799	1931;2637;3798
sp|Q9I1L9|DLDH1_PSEAE	sp|Q9I1L9|DLDH1_PSEAE	2	2	2	>sp|Q9I1L9|DLDH1_PSEAE Dihydrolipoyl dehydrogenase OS=Pseudomonas aeruginosa (strain ATCC 15692 / PAO1 / 1C / PRS 101 / LMG 12228) GN=lpdV PE=1 SV=1	1	2	2	2	5.6	5.6	5.6	48.588	464	464	0	1.3021	28915000	3				180	139;1698	True;True	143;1717	258;3102;3103	709;6145;6146	709;6146
sp|Q9I1M0|ODB2_PSEAE	sp|Q9I1M0|ODB2_PSEAE	1	1	1	>sp|Q9I1M0|ODB2_PSEAE Lipoamide acyltransferase component of branched-chain alpha-keto acid dehydrogenase complex OS=Pseudomonas aeruginosa (strain ATCC 15692 / PAO1 / 1C / PRS 101 / LMG 12228) GN=bkdB PE=1 SV=1	1	1	1	1	2.3	2.3	2.3	45.774	428	428	0	2.083	11432000	2				181	1864	TRUE	1884	3387;3388	6643;6644	6644
sp|Q9I1M1|ODBB_PSEAE	sp|Q9I1M1|ODBB_PSEAE	2	2	2	>sp|Q9I1M1|ODBB_PSEAE 2-oxoisovalerate dehydrogenase subunit beta OS=Pseudomonas aeruginosa (strain ATCC 15692 / PAO1 / 1C / PRS 101 / LMG 12228) GN=bkdA2 PE=3 SV=1	1	2	2	2	7.7	7.7	7.7	38.324	350	350	0	6.1029	30731000	7				182	1383;1445	True;True	1401;1463	2540;2541;2652;2653	5122;5123;5334;5335;5336;5337;5338	5123;5338
sp|Q9I1M2|ODBA_PSEAE	sp|Q9I1M2|ODBA_PSEAE	1	1	1	>sp|Q9I1M2|ODBA_PSEAE 2-oxoisovalerate dehydrogenase subunit alpha OS=Pseudomonas aeruginosa (strain ATCC 15692 / PAO1 / 1C / PRS 101 / LMG 12228) GN=bkdA1 PE=3 SV=1	1	1	1	1	4.9	4.9	4.9	45.256	410	410	0	5.8383	7309100	1				183	1768	TRUE	1788	3224	6372	6372
sp|Q9I1S2|HCNB_PSEAE	sp|Q9I1S2|HCNB_PSEAE	6	6	6	>sp|Q9I1S2|HCNB_PSEAE Hydrogen cyanide synthase subunit HcnB OS=Pseudomonas aeruginosa (strain ATCC 15692 / PAO1 / 1C / PRS 101 / LMG 12228) GN=hcnB PE=1 SV=1	1	6	6	6	15.9	15.9	15.9	50.388	464	464	0	14.939	225330000	17				184	96;132;353;715;1038;1582	True;True;True;True;True;True	99;136;362;726;1051;1600	175;176;246;247;669;670;1313;1314;1915;1916;2901	466;467;468;469;693;694;695;696;1644;1645;2816;2817;3959;3960;3961;3962;5798	466;693;1644;2817;3961;5798
sp|Q9I291|GALU_PSEAE	sp|Q9I291|GALU_PSEAE	2	2	2	>sp|Q9I291|GALU_PSEAE UTP--glucose-1-phosphate uridylyltransferase OS=Pseudomonas aeruginosa (strain ATCC 15692 / PAO1 / 1C / PRS 101 / LMG 12228) GN=galU PE=3 SV=1	1	2	2	2	15.1	15.1	15.1	31.236	279	279	0	11.922	33724000	3				185	1302;1891	True;True	1320;1911	2402;3437;3438	4896;6823;6824;6825	4896;6824
sp|Q9I2A8|ATOB_PSEAE	sp|Q9I2A8|ATOB_PSEAE	8	8	8	>sp|Q9I2A8|ATOB_PSEAE Acetyl-CoA acetyltransferase OS=Pseudomonas aeruginosa (strain ATCC 15692 / PAO1 / 1C / PRS 101 / LMG 12228) GN=atoB PE=3 SV=1	1	8	8	8	46.1	46.1	46.1	40.405	393	393	0	18.406	194540000	21				186	100;136;273;526;728;1018;1110;1511	True;True;True;True;True;True;True;True	103;140;280;537;739;1030;1124;1529	186;253;254;513;984;1335;1336;1874;1875;2038;2039;2770;2771;2772	492;702;703;704;705;1197;2236;2841;2842;2843;3884;3885;3886;3887;4178;4179;4180;4181;5543;5544;5545;5546	492;702;1197;2236;2842;3885;4180;5543
sp|Q9I2P8|NFUA_PSEAE	sp|Q9I2P8|NFUA_PSEAE	1	1	1	>sp|Q9I2P8|NFUA_PSEAE Fe/S biogenesis protein NfuA OS=Pseudomonas aeruginosa (strain ATCC 15692 / PAO1 / 1C / PRS 101 / LMG 12228) GN=nfuA PE=3 SV=1	1	1	1	1	9.8	9.8	9.8	21.136	194	194	0	3.0694	1244000	1				187	1384	TRUE	1402	2542	5124	5124
sp|Q9I2Q2|METH_PSEAE	sp|Q9I2Q2|METH_PSEAE	1	1	1	>sp|Q9I2Q2|METH_PSEAE Methionine synthase OS=Pseudomonas aeruginosa (strain ATCC 15692 / PAO1 / 1C / PRS 101 / LMG 12228) GN=metH PE=3 SV=1	1	1	1	1	1.9	1.9	1.9	135.06	1234	1234	0	3.0672	1373000	1				188	812	TRUE	823	1472	3089	3089
sp|Q9I2U0|CLPX_PSEAE	sp|Q9I2U0|CLPX_PSEAE	7	7	7	>sp|Q9I2U0|CLPX_PSEAE ATP-dependent Clp protease ATP-binding subunit ClpX OS=Pseudomonas aeruginosa (strain ATCC 15692 / PAO1 / 1C / PRS 101 / LMG 12228) GN=clpX PE=3 SV=1	1	7	7	7	28.4	28.4	28.4	46.991	426	426	0	23.643	130390000	33				189	490;999;1027;1072;1430;1543;1557	True;True;True;True;True;True;True	500;1011;1039;1086;1448;1561;1575	917;1836;1890;1891;1892;1976;1977;1978;1979;2626;2627;2838;2863	2111;3803;3908;3909;3910;3911;3912;3913;4066;4067;4068;4069;4070;4071;4072;4073;4074;4075;4076;4077;4078;4079;4080;4081;4082;4083;4084;4085;4086;5286;5287;5288;5699;5736	2111;3803;3908;4074;5286;5699;5736
sp|Q9I2U8|SYQ_PSEAE	sp|Q9I2U8|SYQ_PSEAE	2	2	2	>sp|Q9I2U8|SYQ_PSEAE Glutamine--tRNA ligase OS=Pseudomonas aeruginosa (strain ATCC 15692 / PAO1 / 1C / PRS 101 / LMG 12228) GN=glnS PE=1 SV=1	1	2	2	2	5.6	5.6	5.6	62.912	556	556	0	5.7373	35704000	2				190	64;1815	True;True	67;1835	124;3305	340;6525	340;6525
sp|Q9I2V5|ACNB_PSEAE	sp|Q9I2V5|ACNB_PSEAE	27	27	27	>sp|Q9I2V5|ACNB_PSEAE Aconitate hydratase B OS=Pseudomonas aeruginosa (strain ATCC 15692 / PAO1 / 1C / PRS 101 / LMG 12228) GN=acnB PE=3 SV=1	1	27	27	27	45.6	45.6	45.6	93.627	869	869	0	111.47	1696200000	138				191	4;19;57;81;270;280;303;587;836;967;1061;1071;1077;1102;1134;1185;1213;1281;1387;1452;1488;1540;1764;1767;1780;1850;1901	True;True;True;True;True;True;True;True;True;True;True;True;True;True;True;True;True;True;True;True;True;True;True;True;True;True;True	4;5;20;60;84;277;287;312;598;848;979;1075;1085;1091;1116;1148;1200;1228;1229;1299;1405;1470;1506;1558;1784;1787;1800;1870;1921	8;9;10;31;32;33;34;113;114;155;156;505;506;524;525;579;580;581;582;1085;1086;1524;1773;1774;1775;1776;1958;1959;1974;1975;1985;1986;2025;2026;2089;2090;2179;2180;2181;2182;2232;2233;2234;2235;2236;2364;2365;2366;2367;2368;2547;2548;2549;2665;2666;2728;2729;2833;3217;3222;3223;3245;3246;3367;3453	8;9;10;11;12;13;14;46;47;48;49;50;51;52;53;54;55;320;321;322;323;435;436;437;438;1182;1183;1184;1185;1186;1220;1221;1470;1471;1472;1473;1474;1475;1476;1477;1478;2393;2394;2395;2396;3216;3217;3218;3680;3681;3682;3683;3684;3685;3686;3687;3688;3689;3690;3691;3692;3693;3694;3695;3696;3697;3698;3699;3700;3701;4033;4034;4035;4036;4037;4038;4039;4040;4061;4062;4063;4064;4065;4093;4094;4161;4162;4274;427…	10;51;323;436;1185;1221;1470;2396;3216;3695;4035;4061;4094;4162;4277;4436;4522;4814;5135;5356;5467;5691;6359;6370;6421;6612;6854	12;13;14	93;411;423
sp|Q9I2W7|RRAAH_PSEAE	sp|Q9I2W7|RRAAH_PSEAE	1	1	1	>sp|Q9I2W7|RRAAH_PSEAE Putative 4-hydroxy-4-methyl-2-oxoglutarate aldolase OS=Pseudomonas aeruginosa (strain ATCC 15692 / PAO1 / 1C / PRS 101 / LMG 12228) GN=PA1772 PE=1 SV=1	1	1	1	1	6.2	6.2	6.2	17.404	162	162	0	1.6457	7477700	1				192	143	TRUE	147	266	733	733
sp|Q9I383|SELD_PSEAE	sp|Q9I383|SELD_PSEAE	3	3	3	>sp|Q9I383|SELD_PSEAE Selenide, water dikinase OS=Pseudomonas aeruginosa (strain ATCC 15692 / PAO1 / 1C / PRS 101 / LMG 12228) GN=selD PE=3 SV=1	1	3	3	3	14.8	14.8	14.8	36.353	344	344	0	8.2457	49268000	12				193	168;688;1654	True;True;True	172;699;1673	304;305;1264;1265;3021;3022	790;791;792;2736;2737;2738;2739;2740;2741;2742;6004;6005	790;2736;6005
sp|Q9I3D1|DLDH2_PSEAE	sp|Q9I3D1|DLDH2_PSEAE	13	13	13	>sp|Q9I3D1|DLDH2_PSEAE Dihydrolipoyl dehydrogenase OS=Pseudomonas aeruginosa (strain ATCC 15692 / PAO1 / 1C / PRS 101 / LMG 12228) GN=lpdG PE=3 SV=1	1	13	13	13	36.2	36.2	36.2	50.164	478	478	0	85.474	1216600000	77				194	53;141;162;194;202;508;687;966;1010;1266;1367;1378;1592	True;True;True;True;True;True;True;True;True;True;True;True;True	56;145;166;198;199;207;208;518;698;978;1022;1283;1385;1396;1611	107;108;260;261;294;295;355;356;357;358;373;374;375;376;945;946;1262;1263;1770;1771;1772;1860;2338;2339;2511;2527;2528;2529;2530;2923;2924	312;313;314;315;711;712;713;714;770;771;772;773;774;874;875;876;877;878;879;880;881;882;883;905;906;907;908;909;2159;2160;2161;2162;2163;2164;2165;2166;2167;2727;2728;2729;2730;2731;2732;2733;2734;2735;3676;3677;3678;3679;3861;4745;4746;4747;4748;4749;4750;4751;4752;4753;5078;5079;5100;5101;5102;5103;5104;5831;5832;5833;5834;5835;5836;5837;5838;5839;5840	315;713;772;878;907;2164;2733;3676;3861;4751;5078;5100;5836	15;16	336;348
sp|Q9I3D2|ODO2_PSEAE	sp|Q9I3D2|ODO2_PSEAE	6	6	6	>sp|Q9I3D2|ODO2_PSEAE Dihydrolipoyllysine-residue succinyltransferase component of 2-oxoglutarate dehydrogenase complex OS=Pseudomonas aeruginosa (strain ATCC 15692 / PAO1 / 1C / PRS 101 / LMG 12228) GN=sucB PE=3 SV=1	1	6	6	6	20.3	20.3	20.3	42.887	409	409	0	15.706	138860000	13				195	293;635;977;1112;1222;1798	True;True;True;True;True;True	300;646;989;1126;1239;1818	547;1176;1177;1794;1795;2041;2042;2262;2263;3275;3276;3277	1247;2574;2575;2576;3729;3730;4183;4184;4185;4607;4608;4609;6472;6473;6474	1247;2574;3729;4184;4608;6472
sp|Q9I3F5|ACNA_PSEAE	sp|Q9I3F5|ACNA_PSEAE	18	18	18	>sp|Q9I3F5|ACNA_PSEAE Aconitate hydratase A OS=Pseudomonas aeruginosa (strain ATCC 15692 / PAO1 / 1C / PRS 101 / LMG 12228) GN=acnA PE=3 SV=1	1	18	18	18	30.3	30.3	30.3	99.147	910	910	0	57.899	614490000	73				196	114;123;384;460;537;740;794;826;827;917;1571;1609;1623;1710;1729;1733;1839;1908	True;True;True;True;True;True;True;True;True;True;True;True;True;True;True;True;True;True	118;127;393;469;548;751;805;838;839;929;1589;1628;1642;1729;1748;1752;1859;1928	216;217;232;724;725;726;727;728;860;999;1000;1353;1354;1448;1500;1501;1502;1682;1683;2882;2883;2884;2950;2972;2973;3125;3126;3154;3155;3160;3161;3162;3163;3348;3349;3463;3464	646;647;672;1736;1737;1738;1739;1740;1741;1742;1743;1744;1745;1746;1747;1748;1749;1750;1751;1752;1753;1754;1755;1756;1757;1758;1982;2254;2255;2256;2257;2258;2869;2870;2871;3045;3138;3139;3140;3513;3514;3515;5763;5764;5765;5766;5767;5768;5769;5770;5883;5918;5919;5920;5921;5922;5923;5924;5925;6191;6192;6230;6231;6232;6233;6238;6239;6240;6241;6242;6585;6586;6866;6867	646;672;1737;1982;2255;2871;3045;3139;3140;3513;5768;5883;5921;6192;6232;6240;6585;6867
sp|Q9I4F5|DCTA2_PSEAE	sp|Q9I4F5|DCTA2_PSEAE	1	1	1	>sp|Q9I4F5|DCTA2_PSEAE C4-dicarboxylate transport protein 2 OS=Pseudomonas aeruginosa (strain ATCC 15692 / PAO1 / 1C / PRS 101 / LMG 12228) GN=dctA2 PE=2 SV=1	1	1	1	1	2.3	2.3	2.3	45.993	436	436	0.005814	0.86044	1194100	2				197	716	TRUE	727	1315;1316	2818;2819	2818
sp|Q9I4Z4|PAL_PSEAE	sp|Q9I4Z4|PAL_PSEAE	4	4	4	>sp|Q9I4Z4|PAL_PSEAE Peptidoglycan-associated lipoprotein OS=Pseudomonas aeruginosa (strain ATCC 15692 / PAO1 / 1C / PRS 101 / LMG 12228) GN=pal PE=3 SV=1	1	4	4	4	32.7	32.7	32.7	17.925	168	168	0	11.92	115550000	13				198	443;464;1818;1903	True;True;True;True	452;473;1838;1923	828;829;868;869;3311;3312;3313;3456;3457	1943;1944;2001;2002;6531;6532;6533;6534;6535;6857;6858;6859;6860	1943;2001;6532;6857
sp|Q9I502|SYP_PSEAE	sp|Q9I502|SYP_PSEAE	2	2	2	>sp|Q9I502|SYP_PSEAE Proline--tRNA ligase OS=Pseudomonas aeruginosa (strain ATCC 15692 / PAO1 / 1C / PRS 101 / LMG 12228) GN=proS PE=3 SV=1	1	2	2	2	4.4	4.4	4.4	63.103	571	571	0	1.1827	580850	2				199	1292;1804	True;True	1310;1824	2387;3287	4866;6490	4866;6490
sp|Q9I513|PUR5_PSEAE	sp|Q9I513|PUR5_PSEAE	1	1	1	>sp|Q9I513|PUR5_PSEAE Phosphoribosylformylglycinamidine cyclo-ligase OS=Pseudomonas aeruginosa (strain ATCC 15692 / PAO1 / 1C / PRS 101 / LMG 12228) GN=purM PE=3 SV=1	1	1	1	1	3.1	3.1	3.1	37.122	353	353	0	1.285	4473200	1				200	6	TRUE	7	12	16	16
sp|Q9I553|SYA_PSEAE	sp|Q9I553|SYA_PSEAE	6	6	6	>sp|Q9I553|SYA_PSEAE Alanine--tRNA ligase OS=Pseudomonas aeruginosa (strain ATCC 15692 / PAO1 / 1C / PRS 101 / LMG 12228) GN=alaS PE=3 SV=1	1	6	6	6	9.7	9.7	9.7	94.701	874	874	0	21.346	44678000	6				201	20;140;477;799;857;1286	True;True;True;True;True;True	21;144;487;810;869;1304	35;259;893;1453;1557;1558;2376	56;710;2055;3051;3284;3285;4839	56;710;2055;3051;3284;4839
sp|Q9I558|ACSA1_PSEAE	sp|Q9I558|ACSA1_PSEAE	4	4	4	>sp|Q9I558|ACSA1_PSEAE Acetyl-coenzyme A synthetase 1 OS=Pseudomonas aeruginosa (strain ATCC 15692 / PAO1 / 1C / PRS 101 / LMG 12228) GN=acsA1 PE=3 SV=1	1	4	4	4	8.9	8.9	8.9	71.762	651	651	0	21.798	79863000	7				202	26;172;395;1814	True;True;True;True	27;176;404;1834	44;313;314;744;745;3303;3304	78;812;813;1777;1778;6523;6524	78;812;1777;6523
sp|Q9I576|HPPD_PSEAE	sp|Q9I576|HPPD_PSEAE	1	1	1	>sp|Q9I576|HPPD_PSEAE 4-hydroxyphenylpyruvate dioxygenase OS=Pseudomonas aeruginosa (strain ATCC 15692 / PAO1 / 1C / PRS 101 / LMG 12228) GN=hpd PE=3 SV=1	1	1	1	1	4.2	4.2	4.2	39.912	357	357	0	10.614	7232100	2				203	1231	TRUE	1248	2283;2284	4665;4666	4665
sp|Q9I5A5|PTA_PSEAE	sp|Q9I5A5|PTA_PSEAE	3	3	3	>sp|Q9I5A5|PTA_PSEAE Phosphate acetyltransferase OS=Pseudomonas aeruginosa (strain ATCC 15692 / PAO1 / 1C / PRS 101 / LMG 12228) GN=pta PE=1 SV=1	1	3	3	3	4.1	4.1	4.1	75.696	704	704	0	4.9829	46591000	5				204	278;871;1696	True;True;True	285;883;1715	521;1592;1593;3098;3099	1215;3350;3351;6141;6142	1215;3350;6141
sp|Q9I5G8|LEPA_PSEAE	sp|Q9I5G8|LEPA_PSEAE	1	1	1	>sp|Q9I5G8|LEPA_PSEAE Elongation factor 4 OS=Pseudomonas aeruginosa (strain ATCC 15692 / PAO1 / 1C / PRS 101 / LMG 12228) GN=lepA PE=3 SV=1	1	1	1	1	1.7	1.7	1.7	66.294	599	599	0	1.8588	6692000	1				205	1154	TRUE	1169	2124	4352	4352
sp|Q9I5Y1|ALF_PSEAE	sp|Q9I5Y1|ALF_PSEAE	4	4	4	>sp|Q9I5Y1|ALF_PSEAE Fructose-bisphosphate aldolase OS=Pseudomonas aeruginosa (strain ATCC 15692 / PAO1 / 1C / PRS 101 / LMG 12228) GN=fba PE=3 SV=1	1	4	4	4	13.8	13.8	13.8	38.573	354	354	0	6.351	32617000	4				206	449;795;1573;1869	True;True;True;True	458;806;1591;1889	837;1449;2886;2887;3404	1953;3046;5772;5773;6774	1953;3046;5773;6774
sp|Q9I5Y4|PGK_PSEAE	sp|Q9I5Y4|PGK_PSEAE	1	1	1	>sp|Q9I5Y4|PGK_PSEAE Phosphoglycerate kinase OS=Pseudomonas aeruginosa (strain ATCC 15692 / PAO1 / 1C / PRS 101 / LMG 12228) GN=pgk PE=3 SV=1	1	1	1	1	4.4	4.4	4.4	40.404	387	387	0	3.4379	17051000	2				207	1613	TRUE	1632	2955;2956	5890;5891	5890
sp|Q9I5Z0|METK_PSEAE	sp|Q9I5Z0|METK_PSEAE	8	8	8	>sp|Q9I5Z0|METK_PSEAE S-adenosylmethionine synthase OS=Pseudomonas aeruginosa (strain ATCC 15692 / PAO1 / 1C / PRS 101 / LMG 12228) GN=metK PE=3 SV=1	1	8	8	8	28.3	28.3	28.3	42.709	396	396	0	23.192	301840000	16				208	274;719;790;1180;1254;1359;1419;1813	True;True;True;True;True;True;True;True	281;730;801;1195;1271;1377;1437;1833	514;515;1320;1321;1438;1439;2171;2322;2323;2496;2497;2606;3302	1198;1199;1200;2823;2824;3032;3033;3034;4419;4726;4727;4728;4729;5048;5049;5258;6522	1199;2824;3033;4419;4726;5048;5258;6522
sp|Q9I636|MASZ_PSEAE	sp|Q9I636|MASZ_PSEAE	2	2	2	>sp|Q9I636|MASZ_PSEAE Malate synthase G OS=Pseudomonas aeruginosa (strain ATCC 15692 / PAO1 / 1C / PRS 101 / LMG 12228) GN=glcB PE=3 SV=1	1	2	2	2	3.2	3.2	3.2	78.659	725	725	0	2.8965	8918800	2				209	1759;1781	True;True	1779;1801	3209;3247	6347;6424	6347;6424
sp|Q9I685|SAHH_PSEAE	sp|Q9I685|SAHH_PSEAE	17	17	17	>sp|Q9I685|SAHH_PSEAE Adenosylhomocysteinase OS=Pseudomonas aeruginosa (strain ATCC 15692 / PAO1 / 1C / PRS 101 / LMG 12228) GN=ahcY PE=3 SV=1	1	17	17	17	46.9	46.9	46.9	51.399	469	469	0	49.715	1026700000	65				210	267;272;412;584;781;817;892;1093;1124;1247;1311;1377;1390;1617;1754;1858;1861	True;True;True;True;True;True;True;True;True;True;True;True;True;True;True;True;True	274;279;421;595;792;828;829;904;1107;1138;1264;1329;1395;1408;1636;1774;1878;1881	500;501;509;510;511;512;776;777;1080;1081;1423;1424;1479;1480;1481;1482;1628;1629;1630;2011;2012;2073;2074;2310;2311;2417;2418;2526;2556;2557;2962;2963;3202;3203;3376;3377;3382	1174;1175;1189;1190;1191;1192;1193;1194;1195;1196;1841;1842;1843;1844;1845;2379;2380;2381;2382;2383;2384;3013;3014;3101;3102;3103;3104;3105;3106;3414;3415;3416;4131;4132;4250;4251;4705;4706;4707;4708;4926;4927;4928;4929;5099;5146;5147;5148;5149;5904;5905;5906;5907;6334;6335;6336;6337;6338;6339;6340;6341;6623;6624;6625;6626;6627;6637	1174;1192;1844;2380;3014;3102;3416;4132;4251;4707;4928;5099;5149;5905;6339;6626;6637	17	387
sp|Q9I6E0|ILVD_PSEAE	sp|Q9I6E0|ILVD_PSEAE	2	2	2	>sp|Q9I6E0|ILVD_PSEAE Dihydroxy-acid dehydratase OS=Pseudomonas aeruginosa (strain ATCC 15692 / PAO1 / 1C / PRS 101 / LMG 12228) GN=ilvD PE=3 SV=1	1	2	2	2	3.4	3.4	3.4	65.159	612	612	0	2.7596	12674000	3				211	83;1726	True;True	86;1745	158;159;3149	440;441;6223	441;6223
sp|Q9I6M4|DAVT_PSEAE	sp|Q9I6M4|DAVT_PSEAE	8	8	8	>sp|Q9I6M4|DAVT_PSEAE 5-aminovalerate aminotransferase DavT OS=Pseudomonas aeruginosa (strain ATCC 15692 / PAO1 / 1C / PRS 101 / LMG 12228) GN=davT PE=1 SV=1	1	8	8	8	26.5	26.5	26.5	45.22	426	426	0	26.353	196940000	18				212	63;507;675;1538;1559;1567;1688;1823	True;True;True;True;True;True;True;True	66;517;686;1556;1577;1585;1707;1843	123;943;944;1239;1240;2830;2831;2865;2866;2877;3084;3085;3321	338;339;2153;2154;2155;2156;2157;2158;2676;2677;5687;5688;5689;5738;5739;5758;6123;6124;6545	338;2158;2676;5688;5738;5758;6123;6545
sp|Q9I6M5|DAVD_PSEAE	sp|Q9I6M5|DAVD_PSEAE	6	6	6	>sp|Q9I6M5|DAVD_PSEAE Glutarate-semialdehyde dehydrogenase DavD OS=Pseudomonas aeruginosa (strain ATCC 15692 / PAO1 / 1C / PRS 101 / LMG 12228) GN=davD PE=1 SV=1	1	6	6	6	19.5	19.5	19.5	51.622	483	483	0	23.074	101680000	9				213	674;881;882;1046;1356;1748	True;True;True;True;True;True	685;893;894;1059;1374;1767	1238;1610;1611;1612;1929;1930;2492;3186;3187	2675;3381;3382;3383;3983;3984;5041;6272;6273;6274;6275	2675;3381;3383;3983;5041;6274
sp|Q9I702|BAUC_PSEAE	sp|Q9I702|BAUC_PSEAE	1	1	1	>sp|Q9I702|BAUC_PSEAE Putative 3-oxopropanoate dehydrogenase OS=Pseudomonas aeruginosa (strain ATCC 15692 / PAO1 / 1C / PRS 101 / LMG 12228) GN=bauC PE=2 SV=1	1	1	1	1	3.8	3.8	3.8	53.322	497	497	0	3.4009	15481000	2				214	316	TRUE	325	606;607	1530;1531	1531
sp|Q9I742|CLPV1_PSEAE	sp|Q9I742|CLPV1_PSEAE	14	14	14	>sp|Q9I742|CLPV1_PSEAE Protein ClpV1 OS=Pseudomonas aeruginosa (strain ATCC 15692 / PAO1 / 1C / PRS 101 / LMG 12228) GN=clpV1 PE=1 SV=1	1	14	14	14	20.1	20.1	20.1	98.737	902	902	0	33.392	337900000	29				215	0;128;444;553;744;759;862;1108;1130;1173;1224;1241;1352;1761	True;True;True;True;True;True;True;True;True;True;True;True;True;True	0;132;453;564;755;770;874;1122;1144;1188;1241;1258;1370;1781	0;1;240;241;830;831;1025;1026;1363;1387;1388;1570;1571;2035;2083;2158;2159;2266;2267;2299;2300;2486;2487;3212	0;1;681;682;683;1945;1946;2302;2303;2917;2965;2966;3307;3308;3309;4174;4264;4401;4402;4403;4404;4614;4615;4616;4689;4690;5032;5033;6350	1;681;1945;2302;2917;2966;3309;4174;4264;4402;4614;4690;5033;6350
sp|Q9I747|HCP1_PSEAE	sp|Q9I747|HCP1_PSEAE	2	2	2	>sp|Q9I747|HCP1_PSEAE Protein hcp1 OS=Pseudomonas aeruginosa (strain ATCC 15692 / PAO1 / 1C / PRS 101 / LMG 12228) GN=hcp1 PE=1 SV=1	1	2	2	2	16.7	16.7	16.7	17.414	162	162	0	4.6347	51223000	4				216	457;1752	True;True	466;1772	854;855;3199;3200	1974;1975;6331;6332	1975;6331
sp|Q9I7B8|SYGB_PSEAE	sp|Q9I7B8|SYGB_PSEAE	3	3	3	>sp|Q9I7B8|SYGB_PSEAE Glycine--tRNA ligase beta subunit OS=Pseudomonas aeruginosa (strain ATCC 15692 / PAO1 / 1C / PRS 101 / LMG 12228) GN=glyS PE=3 SV=1	1	3	3	3	6.1	6.1	6.1	73.973	684	684	0	4.8534	53145000	6				217	7;149;849	True;True;True	8;153;861	13;14;275;276;1543;1544	17;18;746;747;3245;3246	17;747;3246
sp|Q9I7C2|GYRB_PSEAE	sp|Q9I7C2|GYRB_PSEAE	8	8	8	>sp|Q9I7C2|GYRB_PSEAE DNA gyrase subunit B OS=Pseudomonas aeruginosa (strain ATCC 15692 / PAO1 / 1C / PRS 101 / LMG 12228) GN=gyrB PE=3 SV=1	1	8	8	8	15.4	15.4	15.4	90.188	806	806	0	33.203	171540000	26				218	77;419;1263;1375;1402;1490;1797;1872	True;True;True;True;True;True;True;True	80;428;1280;1393;1420;1508;1817;1892	149;790;2334;2335;2523;2576;2731;2732;2733;2734;3271;3272;3273;3274;3409	404;1877;4740;4741;4742;5095;5096;5195;5472;5473;5474;5475;5476;6461;6462;6463;6464;6465;6466;6467;6468;6469;6470;6471;6781;6782;6783;6784	404;1877;4740;5095;5195;5472;6466;6783
sp|Q9LCT3|SECA_PSEAE	sp|Q9LCT3|SECA_PSEAE	8	8	8	>sp|Q9LCT3|SECA_PSEAE Protein translocase subunit SecA OS=Pseudomonas aeruginosa (strain ATCC 15692 / PAO1 / 1C / PRS 101 / LMG 12228) GN=secA PE=3 SV=1	1	8	8	8	14.3	14.3	14.3	103.85	916	916	0	16.745	152860000	17				219	241;387;576;911;1063;1085;1564;1855	True;True;True;True;True;True;True;True	247;396;587;923;1077;1099;1582;1875	447;732;1066;1067;1670;1671;1961;1962;1998;2873;2874;3373	1023;1762;2361;2362;2363;2364;3472;3473;4042;4043;4044;4045;4046;4110;5753;5754;5755;6620	1023;1762;2362;3472;4044;4110;5754;6620
sp|Q9S508|PHZB2_PSEAE;sp|O69753|PHZB1_PSEAE	sp|Q9S508|PHZB2_PSEAE;sp|O69753|PHZB1_PSEAE	3;2	3;2	3;2	>sp|Q9S508|PHZB2_PSEAE Phenazine biosynthesis protein PhzB 2 OS=Pseudomonas aeruginosa (strain ATCC 15692 / PAO1 / 1C / PRS 101 / LMG 12228) GN=phzB2 PE=1 SV=1;>sp|O69753|PHZB1_PSEAE Phenazine biosynthesis protein PhzB 1 OS=Pseudomonas aeruginosa (strain A	2	3	3	3	22.8	22.8	22.8	19.027	162	162;162	0	6.4874	101740000	9				220	156;376;1181	True;True;True	160;385;1196	285;286;711;712;2172;2173	758;759;760;1711;1712;4420;4421;4422;4423	759;1712;4423
sp|Q9S646|PPK_PSEAE	sp|Q9S646|PPK_PSEAE	7	7	7	>sp|Q9S646|PPK_PSEAE Polyphosphate kinase OS=Pseudomonas aeruginosa (strain ATCC 15692 / PAO1 / 1C / PRS 101 / LMG 12228) GN=ppk PE=3 SV=1	1	7	7	7	15.7	15.7	15.7	78.292	690	690	0	13.363	52493000	6				221	810;960;1059;1411;1718;1788;1862	True;True;True;True;True;True;True	821;972;1073;1429;1737;1808;1882	1467;1755;1955;2592;2593;3136;3258;3383;3384	3081;3635;4029;5239;5240;6204;6442;6638;6639	3081;3635;4029;5239;6204;6442;6639
sp|Q9X2T1|THIO_PSEAE	sp|Q9X2T1|THIO_PSEAE	2	2	2	>sp|Q9X2T1|THIO_PSEAE Thioredoxin OS=Pseudomonas aeruginosa (strain ATCC 15692 / PAO1 / 1C / PRS 101 / LMG 12228) GN=trxA PE=3 SV=1	1	2	2	2	21.3	21.3	21.3	11.87	108	108	0	2.2042	67270000	5				222	1045;1172	True;True	1058;1187	1927;1928;2156;2157	3980;3981;3982;4399;4400	3981;4400
sp|Q9X4G0|HGD_PSEAE	sp|Q9X4G0|HGD_PSEAE	2	2	2	>sp|Q9X4G0|HGD_PSEAE Homogentisate 1,2-dioxygenase OS=Pseudomonas aeruginosa (strain ATCC 15692 / PAO1 / 1C / PRS 101 / LMG 12228) GN=hmgA PE=3 SV=2	1	2	2	2	8.3	8.3	8.3	47.841	432	432	0	5.3434	11609000	2				223	1262;1838	True;True	1279;1858	2333;3346;3347	4739;6583;6584	4739;6584
sp|Q9XCL6|SYE_PSEAE	sp|Q9XCL6|SYE_PSEAE	1	1	1	>sp|Q9XCL6|SYE_PSEAE Glutamate--tRNA ligase OS=Pseudomonas aeruginosa (strain ATCC 15692 / PAO1 / 1C / PRS 101 / LMG 12228) GN=gltX PE=3 SV=2	1	1	1	1	2.4	2.4	2.4	56.749	494	494	0.0030395	1.092	29554000	4				224	1792	TRUE	1812	3263;3264	6448;6449;6450;6451	6451
tr|G3XCT6|G3XCT6_PSEAE	tr|G3XCT6|G3XCT6_PSEAE	5	5	5	>tr|G3XCT6|G3XCT6_PSEAE Probable two-component sensor OS=Pseudomonas aeruginosa (strain ATCC 15692 / PAO1 / 1C / PRS 101 / LMG 12228) GN=PA1458 PE=4 SV=1	1	5	5	5	15	15	15	79.737	753	753	0	10.727	73853000	6				225	176;540;848;1234;1295	True;True;True;True;True	180;551;860;1251;1313	322;323;1004;1542;2288;2289;2391	823;824;2262;3244;4675;4676;4870	824;2262;3244;4675;4870
tr|G3XCV0|G3XCV0_PSEAE	tr|G3XCV0|G3XCV0_PSEAE	5	5	5	>tr|G3XCV0|G3XCV0_PSEAE Transcriptional regulator FleQ OS=Pseudomonas aeruginosa (strain ATCC 15692 / PAO1 / 1C / PRS 101 / LMG 12228) GN=fleQ PE=1 SV=1	1	5	5	5	18.6	18.6	18.6	55.276	490	490	0	10.218	42839000	8				226	344;483;915;1051;1642	True;True;True;True;True	353;493;927;1064;1661	655;656;903;1676;1938;1939;3004;3005	1612;1613;1614;2071;3479;3995;3996;5982;5983	1614;2071;3479;3995;5982
tr|G3XD64|G3XD64_PSEAE	tr|G3XD64|G3XD64_PSEAE	1	1	1	>tr|G3XD64|G3XD64_PSEAE Site-determining protein OS=Pseudomonas aeruginosa (strain ATCC 15692 / PAO1 / 1C / PRS 101 / LMG 12228) GN=fleN PE=3 SV=1	1	1	1	1	4.6	4.6	4.6	30.037	280	280	0.0083333	0.6087	1259600	1				227	1709	TRUE	1728	3124	6190	6190
tr|G3XDA2|G3XDA2_PSEAE	tr|G3XDA2|G3XDA2_PSEAE	1	1	1	>tr|G3XDA2|G3XDA2_PSEAE 3-oxoacyl-[acyl-carrier-protein] synthase 2 OS=Pseudomonas aeruginosa (strain ATCC 15692 / PAO1 / 1C / PRS 101 / LMG 12228) GN=fabF1 PE=1 SV=1	1	1	1	1	2.7	2.7	2.7	43.497	414	414	0	5.1484	0	1				228	323	TRUE	332	619	1545	1545
tr|Q7DC82|Q7DC82_PSEAE	tr|Q7DC82|Q7DC82_PSEAE	2	2	2	>tr|Q7DC82|Q7DC82_PSEAE Phenazine biosynthesis protein PhzC OS=Pseudomonas aeruginosa (strain ATCC 15692 / PAO1 / 1C / PRS 101 / LMG 12228) GN=phzC1 PE=4 SV=1	1	2	2	2	5.2	5.2	5.2	44.327	405	405	0	2.7362	19494000	2				229	28;1068	True;True	29;1082	47;1969	83;4054	83;4054
tr|Q9HT77|Q9HT77_PSEAE	tr|Q9HT77|Q9HT77_PSEAE	2	2	2	>tr|Q9HT77|Q9HT77_PSEAE NrdJb OS=Pseudomonas aeruginosa (strain ATCC 15692 / PAO1 / 1C / PRS 101 / LMG 12228) GN=nrdJb PE=4 SV=1	1	2	2	2	24.5	24.5	24.5	24.885	229	229	0	6.3077	16566000	2				230	595;1820	True;True	606;1840	1100;3316	2418;6539	2418;6539
tr|Q9HTD1|Q9HTD1_PSEAE	tr|Q9HTD1|Q9HTD1_PSEAE	12	12	12	>tr|Q9HTD1|Q9HTD1_PSEAE Probable transcarboxylase subunit OS=Pseudomonas aeruginosa (strain ATCC 15692 / PAO1 / 1C / PRS 101 / LMG 12228) GN=PA5435 PE=4 SV=1	1	12	12	12	29.2	29.2	29.2	66.095	607	607	0	43.638	459860000	59				231	40;163;181;306;505;739;756;1166;1398;1635;1749;1782	True;True;True;True;True;True;True;True;True;True;True;True	41;167;185;315;515;750;767;1181;1416;1654;1768;1802	67;68;69;70;296;297;330;331;587;588;940;1351;1352;1382;1383;2145;2146;2570;2571;2990;2991;2992;2993;3188;3189;3248;3249	121;122;123;124;125;126;127;128;129;130;131;132;133;134;135;136;137;138;775;776;777;778;779;838;839;1500;1501;1502;1503;1504;1505;2150;2867;2868;2954;2955;2956;2957;4382;4383;4384;4385;5183;5184;5185;5186;5965;5966;5967;5968;6276;6277;6278;6279;6425;6426;6427;6428;6429;6430	130;779;838;1505;2150;2868;2956;4383;5186;5965;6278;6429
tr|Q9HTD9|Q9HTD9_PSEAE	tr|Q9HTD9|Q9HTD9_PSEAE	10	10	10	>tr|Q9HTD9|Q9HTD9_PSEAE Alcohol dehydrogenase OS=Pseudomonas aeruginosa (strain ATCC 15692 / PAO1 / 1C / PRS 101 / LMG 12228) GN=adhA PE=1 SV=1	1	10	10	10	45	45	45	35.911	342	342	0	30.736	452190000	43				232	29;42;165;281;597;746;933;1300;1319;1766	True;True;True;True;True;True;True;True;True;True	30;43;169;288;608;757;945;1318;1337;1786	48;49;72;73;74;299;526;527;1103;1104;1366;1712;1713;2399;2433;2434;3220;3221	84;85;141;142;143;144;145;146;147;148;149;150;782;1222;1223;2421;2422;2423;2424;2425;2426;2427;2428;2920;3570;3571;3572;3573;3574;3575;3576;3577;4892;4944;4945;4946;4947;4948;6364;6365;6366;6367;6368	84;150;782;1223;2426;2920;3574;4892;4945;6365
tr|Q9HTM4|Q9HTM4_PSEAE	tr|Q9HTM4|Q9HTM4_PSEAE	1	1	1	>tr|Q9HTM4|Q9HTM4_PSEAE Uncharacterized protein OS=Pseudomonas aeruginosa (strain ATCC 15692 / PAO1 / 1C / PRS 101 / LMG 12228) GN=PA5333 PE=4 SV=1	1	1	1	1	13	13	13	13.572	123	123	0	2.9867	2924400	1				233	1238	TRUE	1255	2295	4683	4683
tr|Q9HTP2|Q9HTP2_PSEAE	tr|Q9HTP2|Q9HTP2_PSEAE	7	7	7	>tr|Q9HTP2|Q9HTP2_PSEAE Probable aldehyde dehydrogenase OS=Pseudomonas aeruginosa (strain ATCC 15692 / PAO1 / 1C / PRS 101 / LMG 12228) GN=PA5312 PE=3 SV=1	1	7	7	7	27.4	27.4	27.4	53.143	497	497	0	21.774	104370000	15				234	367;509;691;727;880;1461;1550	True;True;True;True;True;True;True	376;519;702;738;892;1479;1568	695;947;948;949;1270;1334;1608;1609;2680;2681;2848	1688;1689;2168;2169;2170;2171;2172;2173;2749;2750;2751;2840;3379;3380;5381;5382;5712	1688;2173;2750;2840;3380;5381;5712
tr|Q9HTW6|Q9HTW6_PSEAE	tr|Q9HTW6|Q9HTW6_PSEAE	3	3	3	>tr|Q9HTW6|Q9HTW6_PSEAE Aminopeptidase P OS=Pseudomonas aeruginosa (strain ATCC 15692 / PAO1 / 1C / PRS 101 / LMG 12228) GN=pepP PE=4 SV=1	1	3	3	3	7.9	7.9	7.9	49.71	444	444	0	1.76	75233000	5				235	745;986;1854	True;True;True	756;998;1874	1364;1365;1814;1815;3372	2918;2919;3775;3776;6619	2918;3776;6619
tr|Q9HU24|Q9HU24_PSEAE	tr|Q9HU24|Q9HU24_PSEAE	3	3	3	>tr|Q9HU24|Q9HU24_PSEAE dTDP-glucose 4,6-dehydratase OS=Pseudomonas aeruginosa (strain ATCC 15692 / PAO1 / 1C / PRS 101 / LMG 12228) GN=rmlB PE=3 SV=1	1	3	3	3	12.2	12.2	12.2	39.542	352	352	0	6.197	15608000	3				236	110;1716;1871	True;True;True	114;1735;1891	210;3134;3407;3408	639;6202;6779;6780	639;6202;6780
tr|Q9HUD3|Q9HUD3_PSEAE	tr|Q9HUD3|Q9HUD3_PSEAE	7	7	7	>tr|Q9HUD3|Q9HUD3_PSEAE Malic enzyme OS=Pseudomonas aeruginosa (strain ATCC 15692 / PAO1 / 1C / PRS 101 / LMG 12228) GN=PA5046 PE=4 SV=1	1	7	7	7	28.7	28.7	28.7	45.428	422	422	0	13.969	117700000	10				237	645;1009;1092;1396;1500;1546;1647	True;True;True;True;True;True;True	656;1021;1106;1414;1518;1564;1666	1192;1859;2010;2567;2568;2750;2842;2843;3012	2594;3860;4130;5180;5181;5509;5704;5705;5706;5990	2594;3860;4130;5181;5509;5706;5990
tr|Q9HUE2|Q9HUE2_PSEAE	tr|Q9HUE2|Q9HUE2_PSEAE	1	1	1	>tr|Q9HUE2|Q9HUE2_PSEAE Uncharacterized protein OS=Pseudomonas aeruginosa (strain ATCC 15692 / PAO1 / 1C / PRS 101 / LMG 12228) GN=PA5027 PE=3 SV=1	1	1	1	1	4.1	4.1	4.1	29.793	271	271	0	2.1175	8715800	1				238	492	TRUE	502	920	2114	2114
tr|Q9HUG0|Q9HUG0_PSEAE	tr|Q9HUG0|Q9HUG0_PSEAE	5	5	5	>tr|Q9HUG0|Q9HUG0_PSEAE Probable carbamoyl transferase OS=Pseudomonas aeruginosa (strain ATCC 15692 / PAO1 / 1C / PRS 101 / LMG 12228) GN=PA5005 PE=4 SV=1	1	5	5	5	12.5	12.5	12.5	66.079	585	585	0	6.1191	39444000	7				239	125;407;408;1001;1760	True;True;True;True;True	129;416;417;1013;1780	235;236;767;768;1844;3210;3211	676;677;1826;1827;3837;6348;6349	677;1826;1827;3837;6348
tr|Q9HUM2|Q9HUM2_PSEAE	tr|Q9HUM2|Q9HUM2_PSEAE	1	1	1	>tr|Q9HUM2|Q9HUM2_PSEAE Protease subunit HflK OS=Pseudomonas aeruginosa (strain ATCC 15692 / PAO1 / 1C / PRS 101 / LMG 12228) GN=hflK PE=4 SV=1	1	1	1	1	6.2	6.2	6.2	44.044	400	400	0.008596	0.72713	439070	1				240	1221	TRUE	1238	2261	4606	4606
tr|Q9HUM7|Q9HUM7_PSEAE	tr|Q9HUM7|Q9HUM7_PSEAE	1	1	1	>tr|Q9HUM7|Q9HUM7_PSEAE Ribonuclease R OS=Pseudomonas aeruginosa (strain ATCC 15692 / PAO1 / 1C / PRS 101 / LMG 12228) GN=rnr PE=3 SV=1	1	1	1	1	2.8	2.8	2.8	100.15	904	904	0	3.4	14581000	4				241	1771	TRUE	1791	3228;3229;3230	6380;6381;6382;6383	6381
tr|Q9HV48|Q9HV48_PSEAE	tr|Q9HV48|Q9HV48_PSEAE	1	1	1	>tr|Q9HV48|Q9HV48_PSEAE ATP-dependent zinc metalloprotease FtsH OS=Pseudomonas aeruginosa (strain ATCC 15692 / PAO1 / 1C / PRS 101 / LMG 12228) GN=ftsH PE=3 SV=1	1	1	1	1	3.6	3.6	3.6	69.954	639	639	0.008547	0.70833	6462900	0				242	667	TRUE	678	1229	2660	2660
tr|Q9HV54|Q9HV54_PSEAE	tr|Q9HV54|Q9HV54_PSEAE	4	4	4	>tr|Q9HV54|Q9HV54_PSEAE Transcription termination/antitermination protein NusA OS=Pseudomonas aeruginosa (strain ATCC 15692 / PAO1 / 1C / PRS 101 / LMG 12228) GN=nusA PE=3 SV=1	1	4	4	4	13.8	13.8	13.8	54.658	493	493	0	11.124	54211000	13				243	313;364;754;1773	True;True;True;True	322;373;765;1793	598;599;691;1377;1378;1379;1380;3233	1521;1522;1684;2944;2945;2946;2947;2948;2949;2950;2951;2952;6387	1522;1684;2948;6387
tr|Q9HV73|Q9HV73_PSEAE	tr|Q9HV73|Q9HV73_PSEAE	1	1	1	>tr|Q9HV73|Q9HV73_PSEAE Two-component response regulator CbrB OS=Pseudomonas aeruginosa (strain ATCC 15692 / PAO1 / 1C / PRS 101 / LMG 12228) GN=cbrB PE=4 SV=1	1	1	1	1	5.6	5.6	5.6	52.286	478	478	0.002994	1.0263	4309800	1				244	91	TRUE	94	169	460	460
tr|Q9HV96|Q9HV96_PSEAE	tr|Q9HV96|Q9HV96_PSEAE	2	2	2	>tr|Q9HV96|Q9HV96_PSEAE Uncharacterized protein OS=Pseudomonas aeruginosa (strain ATCC 15692 / PAO1 / 1C / PRS 101 / LMG 12228) GN=PA4701 PE=4 SV=1	1	2	2	2	4.2	4.2	4.2	58.376	520	520	0	4.5734	13514000	2				245	765;1111	True;True	776;1125	1397;2040	2981;4182	2981;4182
tr|Q9HVA0|Q9HVA0_PSEAE	tr|Q9HVA0|Q9HVA0_PSEAE	2	2	2	>tr|Q9HVA0|Q9HVA0_PSEAE Acetolactate synthase OS=Pseudomonas aeruginosa (strain ATCC 15692 / PAO1 / 1C / PRS 101 / LMG 12228) GN=ilvI PE=3 SV=1	1	2	2	2	6.1	6.1	6.1	63.018	574	574	0	5.505	14537000	17				246	38;706	True;True	39;717	61;62;63;64;1296	101;102;103;104;105;106;107;108;109;110;111;112;113;114;115;116;117;2797	103;2797
tr|Q9HVD5|Q9HVD5_PSEAE	tr|Q9HVD5|Q9HVD5_PSEAE	1	1	1	>tr|Q9HVD5|Q9HVD5_PSEAE Uncharacterized protein OS=Pseudomonas aeruginosa (strain ATCC 15692 / PAO1 / 1C / PRS 101 / LMG 12228) GN=PA4657 PE=4 SV=1	1	1	1	1	4	4	4	35.913	327	327	0	2.4812	4323500	2				247	271	TRUE	278	507;508	1187;1188	1187
tr|Q9HVH3|Q9HVH3_PSEAE	tr|Q9HVH3|Q9HVH3_PSEAE	1	1	1	>tr|Q9HVH3|Q9HVH3_PSEAE Uncharacterized protein OS=Pseudomonas aeruginosa (strain ATCC 15692 / PAO1 / 1C / PRS 101 / LMG 12228) GN=PA4618 PE=4 SV=1	1	1	1	1	3.7	3.7	3.7	34.768	323	323	0	1.1267	191170	1				248	1876	TRUE	1896	3414	6789	6789
tr|Q9HVI3|Q9HVI3_PSEAE	tr|Q9HVI3|Q9HVI3_PSEAE	1	1	1	>tr|Q9HVI3|Q9HVI3_PSEAE Uncharacterized protein OS=Pseudomonas aeruginosa (strain ATCC 15692 / PAO1 / 1C / PRS 101 / LMG 12228) GN=PA4606 PE=4 SV=1	1	1	1	1	2.2	2.2	2.2	73.467	688	688	0	1.9647	1032700	1				249	517	TRUE	527	964	2194	2194
tr|Q9HVJ1|Q9HVJ1_PSEAE	tr|Q9HVJ1|Q9HVJ1_PSEAE	14	14	14	>tr|Q9HVJ1|Q9HVJ1_PSEAE Probable ATP-binding component of ABC transporter OS=Pseudomonas aeruginosa (strain ATCC 15692 / PAO1 / 1C / PRS 101 / LMG 12228) GN=PA4595 PE=4 SV=1	1	14	14	14	32.3	32.3	32.3	61.32	554	554	0	41.89	227910000	23				250	55;130;283;285;482;550;774;777;1305;1326;1343;1405;1607;1727	True;True;True;True;True;True;True;True;True;True;True;True;True;True	58;134;290;292;492;561;785;788;1323;1344;1361;1423;1626;1746	111;243;529;532;533;901;902;1021;1414;1415;1418;2407;2408;2444;2473;2581;2947;3150;3151	318;685;1226;1229;1230;2068;2069;2070;2294;3004;3005;3008;4901;4902;4903;4962;5008;5204;5205;5878;6224;6225;6226	318;685;1226;1229;2068;2294;3004;3008;4901;4962;5008;5205;5878;6224
tr|Q9HVL1|Q9HVL1_PSEAE	tr|Q9HVL1|Q9HVL1_PSEAE	1	1	1	>tr|Q9HVL1|Q9HVL1_PSEAE Uncharacterized protein OS=Pseudomonas aeruginosa (strain ATCC 15692 / PAO1 / 1C / PRS 101 / LMG 12228) GN=PA4573 PE=4 SV=1	1	1	1	1	7.9	7.9	7.9	10.841	101	101	1	-2	706740	0	+			251	1272	TRUE	1289	2348	4768	4768	18	3
tr|Q9HVS8|Q9HVS8_PSEAE	tr|Q9HVS8|Q9HVS8_PSEAE	1	1	1	>tr|Q9HVS8|Q9HVS8_PSEAE RoxR OS=Pseudomonas aeruginosa (strain ATCC 15692 / PAO1 / 1C / PRS 101 / LMG 12228) GN=roxR PE=4 SV=1	1	1	1	1	7.5	7.5	7.5	20.616	186	186	0	2.5914	7448800	2				252	1707	TRUE	1726	3118;3119	6168;6169	6168
tr|Q9HVU0|Q9HVU0_PSEAE	tr|Q9HVU0|Q9HVU0_PSEAE	8	8	8	>tr|Q9HVU0|Q9HVU0_PSEAE Rod shape-determining protein MreB OS=Pseudomonas aeruginosa (strain ATCC 15692 / PAO1 / 1C / PRS 101 / LMG 12228) GN=mreB PE=4 SV=1	1	8	8	8	34.8	34.8	34.8	36.976	345	345	0	40.558	196010000	29				253	455;621;634;1190;1385;1410;1492;1685	True;True;True;True;True;True;True;True	464;632;645;1205;1403;1428;1510;1704	849;850;851;1150;1151;1175;2189;2543;2544;2589;2590;2591;2737;2738;3080	1968;1969;1970;1971;2527;2528;2573;4445;5125;5126;5127;5222;5223;5224;5225;5226;5227;5228;5229;5230;5231;5232;5233;5234;5235;5236;5237;5238;5479;5480;6119	1968;2527;2573;4445;5125;5223;5479;6119
tr|Q9HVV6|Q9HVV6_PSEAE	tr|Q9HVV6|Q9HVV6_PSEAE	2	2	2	>tr|Q9HVV6|Q9HVV6_PSEAE Probable ATP-binding component of ABC transporter OS=Pseudomonas aeruginosa (strain ATCC 15692 / PAO1 / 1C / PRS 101 / LMG 12228) GN=PA4461 PE=4 SV=1	1	2	2	2	14.1	14.1	14.1	26.45	241	241	0	6.5613	23859000	5				254	85;498	True;True	88;508	161;928;929	443;2125;2126;2127;2128;2129	443;2126
tr|Q9HVX7|Q9HVX7_PSEAE	tr|Q9HVX7|Q9HVX7_PSEAE	1	1	1	>tr|Q9HVX7|Q9HVX7_PSEAE Cell division protein ZapE OS=Pseudomonas aeruginosa (strain ATCC 15692 / PAO1 / 1C / PRS 101 / LMG 12228) GN=zapE PE=3 SV=1	1	1	1	1	4.4	4.4	4.4	41.993	364	364	0.0030211	1.086	6299600	1				255	1610	TRUE	1629	2951	5884	5884
tr|Q9HVY4|Q9HVY4_PSEAE	tr|Q9HVY4|Q9HVY4_PSEAE	3	3	3	>tr|Q9HVY4|Q9HVY4_PSEAE Ubiquinol-cytochrome c reductase iron-sulfur subunit OS=Pseudomonas aeruginosa (strain ATCC 15692 / PAO1 / 1C / PRS 101 / LMG 12228) GN=PA4431 PE=4 SV=1	1	3	3	3	17.8	17.8	17.8	20.828	197	197	0	3.1327	28526000	5				256	5;203;737	True;True;True	6;209;748	11;377;378;1348;1349	15;910;911;2864;2865	15;911;2864
tr|Q9HVY5|Q9HVY5_PSEAE	tr|Q9HVY5|Q9HVY5_PSEAE	1	1	1	>tr|Q9HVY5|Q9HVY5_PSEAE Cytochrome b OS=Pseudomonas aeruginosa (strain ATCC 15692 / PAO1 / 1C / PRS 101 / LMG 12228) GN=PA4430 PE=3 SV=1	1	1	1	1	2	2	2	46.072	403	403	0	1.4501	23302000	2				257	515	TRUE	525	959;960	2188;2189	2189
tr|Q9HVY6|Q9HVY6_PSEAE	tr|Q9HVY6|Q9HVY6_PSEAE	2	2	2	>tr|Q9HVY6|Q9HVY6_PSEAE Probable cytochrome c1 OS=Pseudomonas aeruginosa (strain ATCC 15692 / PAO1 / 1C / PRS 101 / LMG 12228) GN=PA4429 PE=4 SV=1	1	2	2	2	10.4	10.4	10.4	28.993	260	260	0	4.8796	50937000	5				258	1531;1608	True;True	1549;1627	2818;2948;2949	5672;5879;5880;5881;5882	5672;5881
tr|Q9HW15|Q9HW15_PSEAE	tr|Q9HW15|Q9HW15_PSEAE	2	2	2	>tr|Q9HW15|Q9HW15_PSEAE Probable short-chain dehydrogenase OS=Pseudomonas aeruginosa (strain ATCC 15692 / PAO1 / 1C / PRS 101 / LMG 12228) GN=speA PE=4 SV=1	1	2	2	2	8.3	8.3	8.3	26.72	252	252	0	4.2691	26818000	3				259	918;1239	True;True	930;1256	1684;1685;2296	3516;3517;4684	3516;4684
tr|Q9HW49|Q9HW49_PSEAE	tr|Q9HW49|Q9HW49_PSEAE	9	9	9	>tr|Q9HW49|Q9HW49_PSEAE Uncharacterized protein OS=Pseudomonas aeruginosa (strain ATCC 15692 / PAO1 / 1C / PRS 101 / LMG 12228) GN=PA4352 PE=3 SV=1	1	9	9	9	53.8	53.8	53.8	30.972	286	286	0	39.914	281540000	47				260	242;292;815;914;1223;1313;1644;1668;1671	True;True;True;True;True;True;True;True;True	248;249;299;826;926;1240;1331;1663;1687;1690	448;449;450;451;546;1476;1674;1675;2264;2265;2420;2421;3007;3008;3049;3050;3051;3052;3056;3057	1024;1025;1026;1027;1028;1029;1030;1031;1032;1246;3093;3094;3477;3478;4610;4611;4612;4613;4931;4932;5985;5986;6043;6044;6045;6046;6047;6048;6049;6050;6051;6052;6053;6054;6055;6056;6057;6058;6059;6060;6061;6062;6068;6069;6070;6071;6072	1025;1246;3093;3478;4611;4932;5986;6055;6069	19	158
tr|Q9HW68|Q9HW68_PSEAE	tr|Q9HW68|Q9HW68_PSEAE	5	5	5	>tr|Q9HW68|Q9HW68_PSEAE Probable fumarase OS=Pseudomonas aeruginosa (strain ATCC 15692 / PAO1 / 1C / PRS 101 / LMG 12228) GN=PA4333 PE=4 SV=1	1	5	5	5	14.4	14.4	14.4	54.763	507	507	0	30.34	79682000	9				261	208;328;1149;1337;1751	True;True;True;True;True	214;337;1164;1355;1771	385;629;2115;2116;2463;3198	920;1573;4334;4335;4336;4337;4338;4994;6330	920;1573;4336;4994;6330
tr|Q9HW72|Q9HW72_PSEAE	tr|Q9HW72|Q9HW72_PSEAE	8	8	8	>tr|Q9HW72|Q9HW72_PSEAE Pyruvate kinase OS=Pseudomonas aeruginosa (strain ATCC 15692 / PAO1 / 1C / PRS 101 / LMG 12228) GN=pykA PE=3 SV=1	1	8	8	8	28.6	28.6	28.6	52.252	483	483	0	12.732	119690000	28				262	51;70;164;535;565;673;863;1725	True;True;True;True;True;True;True;True	54;73;168;546;576;684;875;1744	104;133;134;135;136;298;996;1046;1047;1237;1572;1573;3148	309;361;362;363;364;365;366;367;368;369;370;371;372;373;374;375;376;780;781;2251;2336;2337;2674;3310;3311;3312;3313;6222	309;362;780;2251;2336;2674;3310;6222	20	332
tr|Q9HW73|Q9HW73_PSEAE	tr|Q9HW73|Q9HW73_PSEAE	1	1	1	>tr|Q9HW73|Q9HW73_PSEAE Uncharacterized protein OS=Pseudomonas aeruginosa (strain ATCC 15692 / PAO1 / 1C / PRS 101 / LMG 12228) GN=PA4328 PE=4 SV=1	1	1	1	1	3.9	3.9	3.9	34.419	304	304	0	2.3707	5351100	1				263	1023	TRUE	1035	1884	3898	3898
tr|Q9HWG9|Q9HWG9_PSEAE	tr|Q9HWG9|Q9HWG9_PSEAE	2	2	2	>tr|Q9HWG9|Q9HWG9_PSEAE Flavin-containing monooxygenase OS=Pseudomonas aeruginosa (strain ATCC 15692 / PAO1 / 1C / PRS 101 / LMG 12228) GN=phzS PE=1 SV=1	1	2	2	2	6.7	6.7	6.7	43.644	402	402	0.0030303	1.0883	13981000	1				264	671;1566	True;True	682;1584	1235;2876	2672;5757	2672;5757
tr|Q9HWH2|Q9HWH2_PSEAE	tr|Q9HWH2|Q9HWH2_PSEAE	1	1	1	>tr|Q9HWH2|Q9HWH2_PSEAE Probable phenazine-specific methyltransferase OS=Pseudomonas aeruginosa (strain ATCC 15692 / PAO1 / 1C / PRS 101 / LMG 12228) GN=phzM PE=1 SV=1	1	1	1	1	8.1	8.1	8.1	36.357	334	334	0	2.664	8747700	4				265	983	TRUE	995	1809;1810	3768;3769;3770;3771	3769
tr|Q9HWK1|Q9HWK1_PSEAE	tr|Q9HWK1|Q9HWK1_PSEAE	1	1	1	>tr|Q9HWK1|Q9HWK1_PSEAE Probable acetolactate synthase large subunit OS=Pseudomonas aeruginosa (strain ATCC 15692 / PAO1 / 1C / PRS 101 / LMG 12228) GN=PA4180 PE=3 SV=1	1	1	1	1	2.7	2.7	2.7	59.806	547	547	0	7.191	7266600	3				266	357	TRUE	366	676;677	1655;1656;1657	1655
tr|Q9HWP8|Q9HWP8_PSEAE	tr|Q9HWP8|Q9HWP8_PSEAE	2	2	2	>tr|Q9HWP8|Q9HWP8_PSEAE Cytochrome c oxidase subunit (Cbb3-type) OS=Pseudomonas aeruginosa (strain ATCC 15692 / PAO1 / 1C / PRS 101 / LMG 12228) GN=PA4133 PE=3 SV=1	1	2	2	2	8	8	8	53.318	475	475	0	2.7173	145430000	13				267	237;1314	True;True	243;1332	440;441;442;2422;2423;2424;2425	1010;1011;1012;1013;1014;1015;1016;1017;1018;4933;4934;4935;4936	1014;4934
tr|Q9HWP9|Q9HWP9_PSEAE	tr|Q9HWP9|Q9HWP9_PSEAE	1	1	1	>tr|Q9HWP9|Q9HWP9_PSEAE Uncharacterized protein OS=Pseudomonas aeruginosa (strain ATCC 15692 / PAO1 / 1C / PRS 101 / LMG 12228) GN=PA4132 PE=4 SV=1	1	1	1	1	2.1	2.1	2.1	52.262	471	471	0	2.5655	5841400	1				268	468	TRUE	477	875	2012	2012
tr|Q9HWQ0|Q9HWQ0_PSEAE	tr|Q9HWQ0|Q9HWQ0_PSEAE	4	4	4	>tr|Q9HWQ0|Q9HWQ0_PSEAE Probable iron-sulfur protein OS=Pseudomonas aeruginosa (strain ATCC 15692 / PAO1 / 1C / PRS 101 / LMG 12228) GN=PA4131 PE=4 SV=1	1	4	4	4	10.8	10.8	10.8	63.991	573	573	0	23.085	181910000	8				269	425;610;830;1069	True;True;True;True	434;621;842;1083	800;801;1127;1128;1513;1514;1970;1971	1896;1897;2465;2466;3201;3202;4055;4056	1897;2466;3202;4055
tr|Q9HWV0|Q9HWV0_PSEAE	tr|Q9HWV0|Q9HWV0_PSEAE	1	1	1	>tr|Q9HWV0|Q9HWV0_PSEAE Probable nonribosomal peptide synthetase OS=Pseudomonas aeruginosa (strain ATCC 15692 / PAO1 / 1C / PRS 101 / LMG 12228) GN=PA4078 PE=4 SV=1	1	1	1	1	1.2	1.2	1.2	110.35	991	991	0	2.1656	4637700	1				270	1645	TRUE	1664	3009	5987	5987
tr|Q9HWW7|Q9HWW7_PSEAE	tr|Q9HWW7|Q9HWW7_PSEAE	1	1	1	>tr|Q9HWW7|Q9HWW7_PSEAE Probable thioredoxin OS=Pseudomonas aeruginosa (strain ATCC 15692 / PAO1 / 1C / PRS 101 / LMG 12228) GN=PA4061 PE=4 SV=1	1	1	1	1	7.3	7.3	7.3	31.878	289	289	0	3.1649	7012300	1				271	178	TRUE	182	326	830	830
tr|Q9HX05|Q9HX05_PSEAE;tr|Q9I2C4|Q9I2C4_PSEAE	tr|Q9HX05|Q9HX05_PSEAE;tr|Q9I2C4|Q9I2C4_PSEAE	8;7	8;7	8;7	>tr|Q9HX05|Q9HX05_PSEAE Probable aldehyde dehydrogenase OS=Pseudomonas aeruginosa (strain ATCC 15692 / PAO1 / 1C / PRS 101 / LMG 12228) GN=PA4022 PE=3 SV=1;>tr|Q9I2C4|Q9I2C4_PSEAE NAD+ dependent aldehyde dehydrogenase ExaC OS=Pseudomonas aeruginosa (strain	2	8	8	8	24.3	24.3	24.3	54.979	506	506;506	0	47.879	251790000	21				272	124;160;161;752;811;953;1462;1882	True;True;True;True;True;True;True;True	128;164;165;763;822;965;1480;1902	233;234;291;292;293;1375;1468;1469;1470;1471;1742;1743;2682;2683;3423	673;674;675;765;766;767;768;769;2942;3082;3083;3084;3085;3086;3087;3088;3610;3611;5383;5384;6804	675;766;769;2942;3086;3610;5384;6804
tr|Q9HX44|Q9HX44_PSEAE	tr|Q9HX44|Q9HX44_PSEAE	2	2	2	>tr|Q9HX44|Q9HX44_PSEAE Probable acyl-CoA dehydrogenase OS=Pseudomonas aeruginosa (strain ATCC 15692 / PAO1 / 1C / PRS 101 / LMG 12228) GN=PA3972 PE=3 SV=1	1	2	2	2	5.1	5.1	5.1	60.338	549	549	0	2.3309	8992200	1				273	941;1022	True;True	953;1034	1725;1883	3589;3897	3589;3897
tr|Q9HX46|Q9HX46_PSEAE	tr|Q9HX46|Q9HX46_PSEAE	1	1	1	>tr|Q9HX46|Q9HX46_PSEAE AMP nucleosidase OS=Pseudomonas aeruginosa (strain ATCC 15692 / PAO1 / 1C / PRS 101 / LMG 12228) GN=amn PE=3 SV=1	1	1	1	1	5.8	5.8	5.8	56.225	499	499	0	1.2228	1774900	1				274	153	TRUE	157	280	751	751
tr|Q9HX94|Q9HX94_PSEAE	tr|Q9HX94|Q9HX94_PSEAE	2	2	2	>tr|Q9HX94|Q9HX94_PSEAE Uncharacterized protein OS=Pseudomonas aeruginosa (strain ATCC 15692 / PAO1 / 1C / PRS 101 / LMG 12228) GN=PA3919 PE=4 SV=1	1	2	2	2	7.6	7.6	7.6	51.699	463	463	0	9.1667	20157000	7				275	1489;1542	True;True	1507;1560	2730;2835;2836;2837	5471;5693;5694;5695;5696;5697;5698	5471;5695
tr|Q9HXM5|Q9HXM5_PSEAE	tr|Q9HXM5|Q9HXM5_PSEAE	4	4	4	>tr|Q9HXM5|Q9HXM5_PSEAE Inosine-5-monophosphate dehydrogenase OS=Pseudomonas aeruginosa (strain ATCC 15692 / PAO1 / 1C / PRS 101 / LMG 12228) GN=guaB PE=1 SV=1	1	4	4	4	11.7	11.7	11.7	51.707	489	489	0	7.4358	15653000	9				276	847;1126;1661;1874	True;True;True;True	859;1140;1680;1894	1541;2077;3033;3034;3411	3242;3243;4255;6019;6020;6021;6022;6023;6786	3243;4255;6019;6786
tr|Q9HY01|Q9HY01_PSEAE	tr|Q9HY01|Q9HY01_PSEAE	2	2	2	>tr|Q9HY01|Q9HY01_PSEAE S-(hydroxymethyl)glutathione dehydrogenase OS=Pseudomonas aeruginosa (strain ATCC 15692 / PAO1 / 1C / PRS 101 / LMG 12228) GN=adhC PE=3 SV=1	1	2	2	2	5.4	5.4	5.4	39.208	370	370	0	1.6641	10909000	2				277	410;1401	True;True	419;1419	771;2575	1832;5194	1832;5194
tr|Q9HY12|Q9HY12_PSEAE	tr|Q9HY12|Q9HY12_PSEAE	3	3	3	>tr|Q9HY12|Q9HY12_PSEAE Uncharacterized protein OS=Pseudomonas aeruginosa (strain ATCC 15692 / PAO1 / 1C / PRS 101 / LMG 12228) GN=PA3614 PE=4 SV=1	1	3	3	3	7.9	7.9	7.9	51.921	467	467	0	2.4183	41237000	4				278	329;949;1255	True;True;True	338;961;1272	630;631;632;1737;2324	1574;1575;1576;3605;4730	1576;3605;4730
tr|Q9HY13|Q9HY13_PSEAE	tr|Q9HY13|Q9HY13_PSEAE	16	16	16	>tr|Q9HY13|Q9HY13_PSEAE Uncharacterized protein OS=Pseudomonas aeruginosa (strain ATCC 15692 / PAO1 / 1C / PRS 101 / LMG 12228) GN=PA3613 PE=4 SV=1	1	16	16	16	29.8	29.8	29.8	88.378	801	801	0	34.163	310250000	34				279	247;321;543;598;905;937;1132;1345;1502;1506;1520;1583;1676;1720;1786;1907	True;True;True;True;True;True;True;True;True;True;True;True;True;True;True;True	254;330;554;609;917;949;1146;1363;1520;1524;1538;1601;1695;1739;1806;1927	460;461;615;616;1009;1010;1105;1654;1655;1717;1718;2085;2086;2476;2756;2762;2763;2788;2902;2903;3063;3064;3138;3139;3256;3461;3462	1052;1053;1054;1055;1540;1541;2275;2276;2429;3448;3449;3581;3582;4266;4267;5017;5520;5521;5532;5533;5534;5535;5585;5586;5799;5800;5801;6080;6081;6082;6206;6207;6208;6440;6864;6865	1052;1541;2276;2429;3448;3581;4267;5017;5521;5534;5585;5800;6080;6208;6440;6864
tr|Q9HY24|Q9HY24_PSEAE	tr|Q9HY24|Q9HY24_PSEAE	1	1	1	>tr|Q9HY24|Q9HY24_PSEAE Uncharacterized protein OS=Pseudomonas aeruginosa (strain ATCC 15692 / PAO1 / 1C / PRS 101 / LMG 12228) GN=PA3602 PE=3 SV=1	1	1	1	1	4.1	4.1	4.1	58.786	536	536	0	1.4664	1976600	1				280	876	TRUE	888	1601	3365	3365
tr|Q9HY77|Q9HY77_PSEAE	tr|Q9HY77|Q9HY77_PSEAE	4	4	4	>tr|Q9HY77|Q9HY77_PSEAE Glutaredoxin OS=Pseudomonas aeruginosa (strain ATCC 15692 / PAO1 / 1C / PRS 101 / LMG 12228) GN=PA3533 PE=3 SV=1	1	4	4	4	38.9	38.9	38.9	11.843	108	108	0	4.7372	46955000	7				281	440;475;573;1152	True;True;True;True	449;485;584;1167	824;825;890;891;1062;2121	1939;1940;2051;2052;2053;2356;4348	1939;2053;2356;4348
tr|Q9HY79|Q9HY79_PSEAE	tr|Q9HY79|Q9HY79_PSEAE	1	1	1	>tr|Q9HY79|Q9HY79_PSEAE Ferroxidase OS=Pseudomonas aeruginosa (strain ATCC 15692 / PAO1 / 1C / PRS 101 / LMG 12228) GN=bfrB PE=1 SV=1	1	1	1	1	9.5	9.5	9.5	18.553	158	158	0	1.7399	39563000	3				282	802	TRUE	813	1457	3062;3063;3064	3063
tr|Q9HY81|Q9HY81_PSEAE	tr|Q9HY81|Q9HY81_PSEAE	6	6	6	>tr|Q9HY81|Q9HY81_PSEAE Probable peroxidase OS=Pseudomonas aeruginosa (strain ATCC 15692 / PAO1 / 1C / PRS 101 / LMG 12228) GN=PA3529 PE=1 SV=1	1	6	6	6	28	28	28	21.822	200	200	0	10.861	178110000	13				283	250;546;640;831;1269;1464	True;True;True;True;True;True	257;557;651;843;1286;1482	466;1013;1184;1185;1515;1516;2343;2344;2685;2686	1061;1062;2279;2585;2586;3203;3204;3205;4763;4764;5386;5387;5388;5389	1062;2279;2586;3203;4764;5386
tr|Q9HYC8|Q9HYC8_PSEAE	tr|Q9HYC8|Q9HYC8_PSEAE	2	2	2	>tr|Q9HYC8|Q9HYC8_PSEAE Iron-sulfur cluster carrier protein OS=Pseudomonas aeruginosa (strain ATCC 15692 / PAO1 / 1C / PRS 101 / LMG 12228) GN=PA3481 PE=3 SV=1	1	2	2	2	12.4	12.4	12.4	38.888	364	364	0	4.6302	12220000	3				284	1249;1672	True;True	1266;1691	2313;3058	4710;6073;6074	4710;6074
tr|Q9HYP0|Q9HYP0_PSEAE	tr|Q9HYP0|Q9HYP0_PSEAE	1	1	1	>tr|Q9HYP0|Q9HYP0_PSEAE Uncharacterized protein OS=Pseudomonas aeruginosa (strain ATCC 15692 / PAO1 / 1C / PRS 101 / LMG 12228) GN=PA3356 PE=3 SV=1	1	1	1	1	4.8	4.8	4.8	45.161	413	413	0	1.3258	12075000	2				285	542	TRUE	553	1008	2273;2274	2273
tr|Q9HYR5|Q9HYR5_PSEAE	tr|Q9HYR5|Q9HYR5_PSEAE	6	6	6	>tr|Q9HYR5|Q9HYR5_PSEAE Probable short chain dehydrogenase OS=Pseudomonas aeruginosa (strain ATCC 15692 / PAO1 / 1C / PRS 101 / LMG 12228) GN=PA3330 PE=4 SV=1	1	6	6	6	28.9	28.9	28.9	32.031	304	304	0	9.2997	109120000	7				286	111;117;446;511;1125;1184	True;True;True;True;True;True	115;121;455;521;1139;1199	211;222;223;834;952;2075;2076;2178	640;655;656;1950;2178;4252;4253;4254;4434	640;655;1950;2178;4253;4434
tr|Q9HYR6|Q9HYR6_PSEAE	tr|Q9HYR6|Q9HYR6_PSEAE	1	1	1	>tr|Q9HYR6|Q9HYR6_PSEAE Uncharacterized protein OS=Pseudomonas aeruginosa (strain ATCC 15692 / PAO1 / 1C / PRS 101 / LMG 12228) GN=PA3329 PE=4 SV=1	1	1	1	1	3.2	3.2	3.2	49.134	442	442	0	4.5907	36661000	2				287	907	TRUE	919	1658;1659	3452;3453	3453
tr|Q9HYR7|Q9HYR7_PSEAE	tr|Q9HYR7|Q9HYR7_PSEAE	2	2	2	>tr|Q9HYR7|Q9HYR7_PSEAE Probable FAD-dependent monooxygenase OS=Pseudomonas aeruginosa (strain ATCC 15692 / PAO1 / 1C / PRS 101 / LMG 12228) GN=PA3328 PE=4 SV=1	1	2	2	2	7.7	7.7	7.7	42.498	388	388	0	8.5389	57931000	5				288	211;231	True;True	217;237	391;392;429;430	927;928;992;993;994	927;993
tr|Q9HYR8|Q9HYR8_PSEAE	tr|Q9HYR8|Q9HYR8_PSEAE	41	41	41	>tr|Q9HYR8|Q9HYR8_PSEAE Probable non-ribosomal peptide synthetase OS=Pseudomonas aeruginosa (strain ATCC 15692 / PAO1 / 1C / PRS 101 / LMG 12228) GN=PA3327 PE=4 SV=1	1	41	41	41	25.5	25.5	25.5	259.4	2352	2352	0	108.77	675760000	90				289	73;89;108;127;151;152;251;253;356;369;432;481;514;533;628;648;695;738;750;806;903;947;952;972;1065;1155;1202;1215;1233;1350;1363;1403;1466;1498;1507;1558;1732;1772;1827;1848;1884	True;True;True;True;True;True;True;True;True;True;True;True;True;True;True;True;True;True;True;True;True;True;True;True;True;True;True;True;True;True;True;True;True;True;True;True;True;True;True;True;True	76;92;112;131;155;156;258;260;365;378;441;491;524;544;639;659;706;749;761;817;915;959;964;984;1079;1170;1217;1231;1250;1368;1381;1421;1484;1516;1525;1576;1751;1792;1847;1868;1904	141;166;167;206;207;239;278;279;467;468;470;471;675;698;699;700;812;813;814;815;900;957;958;993;994;1164;1165;1197;1277;1278;1350;1370;1371;1461;1651;1734;1741;1785;1964;1965;2125;2210;2211;2239;2240;2287;2483;2502;2503;2577;2578;2689;2748;2764;2765;2864;3158;3159;3231;3232;3326;3327;3364;3426;3427	391;452;453;454;455;456;457;632;633;680;749;750;1063;1064;1065;1066;1068;1069;1070;1071;1072;1073;1074;1654;1694;1695;1696;1697;1914;1915;1916;1917;1918;1919;1920;1921;1922;1923;1924;1925;1926;1927;1928;1929;2067;2185;2186;2187;2248;2249;2553;2554;2600;2759;2760;2866;2924;2925;3068;3443;3602;3609;3711;4048;4049;4353;4484;4485;4530;4531;4674;5029;5055;5056;5196;5197;5198;5392;5507;5536;5537;5737;6…	391;457;633;680;749;750;1063;1069;1654;1694;1925;2067;2185;2248;2553;2600;2760;2866;2925;3068;3443;3602;3609;3711;4048;4353;4484;4531;4674;5029;5055;5197;5392;5507;5536;5737;6237;6384;6552;6605;6807
tr|Q9HYT5|Q9HYT5_PSEAE	tr|Q9HYT5|Q9HYT5_PSEAE	5	5	5	>tr|Q9HYT5|Q9HYT5_PSEAE Uncharacterized protein OS=Pseudomonas aeruginosa (strain ATCC 15692 / PAO1 / 1C / PRS 101 / LMG 12228) GN=PA3309 PE=3 SV=1	1	5	5	5	39.7	39.7	39.7	16.496	151	151	0	23.751	345810000	23				290	709;816;1034;1628;1700	True;True;True;True;True	720;827;1046;1047;1647;1719	1301;1302;1303;1477;1478;1905;1906;1907;1908;2981;3106	2802;2803;2804;3095;3096;3097;3098;3099;3100;3938;3939;3940;3941;3942;3943;3944;3945;3946;3947;3948;5941;6149;6150;6151	2803;3099;3941;5941;6150	21	129
tr|Q9HYZ6|Q9HYZ6_PSEAE	tr|Q9HYZ6|Q9HYZ6_PSEAE	3	3	3	>tr|Q9HYZ6|Q9HYZ6_PSEAE Site-determining protein OS=Pseudomonas aeruginosa (strain ATCC 15692 / PAO1 / 1C / PRS 101 / LMG 12228) GN=minD PE=3 SV=1	1	3	3	3	18.5	18.5	18.5	29.635	271	271	0	15.606	115440000	9				291	574;1020;1829	True;True;True	585;1032;1849	1063;1064;1878;1879;3330;3331	2357;2358;2359;3891;3892;3893;6557;6558;6559	2358;3893;6559
tr|Q9HZ78|Q9HZ78_PSEAE	tr|Q9HZ78|Q9HZ78_PSEAE	6	6	6	>tr|Q9HZ78|Q9HZ78_PSEAE LPS biosynthesis protein WbpG OS=Pseudomonas aeruginosa (strain ATCC 15692 / PAO1 / 1C / PRS 101 / LMG 12228) GN=wbpG PE=4 SV=1	1	6	6	6	26.5	26.5	26.5	43.503	377	377	0	13.28	75830000	9				292	65;856;964;1346;1604;1890	True;True;True;True;True;True	68;868;976;1364;1623;1910	125;1556;1766;1767;2477;2942;3436	341;3282;3283;3670;3671;5018;5869;6821;6822	341;3282;3670;5018;5869;6822
tr|Q9HZC5|Q9HZC5_PSEAE	tr|Q9HZC5|Q9HZC5_PSEAE	4	4	4	>tr|Q9HZC5|Q9HZC5_PSEAE Aminopeptidase N OS=Pseudomonas aeruginosa (strain ATCC 15692 / PAO1 / 1C / PRS 101 / LMG 12228) GN=pepN PE=4 SV=1	1	4	4	4	5.1	5.1	5.1	100.05	885	885	0	6.9039	19153000	4				293	534;928;951;1711	True;True;True;True	545;940;963;1730	995;1703;1739;1740;3127	2250;3555;3607;3608;6193	2250;3555;3607;6193
tr|Q9HZK4|Q9HZK4_PSEAE	tr|Q9HZK4|Q9HZK4_PSEAE	11	11	11	>tr|Q9HZK4|Q9HZK4_PSEAE Glyceraldehyde-3-phosphate dehydrogenase OS=Pseudomonas aeruginosa (strain ATCC 15692 / PAO1 / 1C / PRS 101 / LMG 12228) GN=PA3001 PE=3 SV=1	1	11	11	11	30.6	30.6	30.6	50.111	461	461	0	46.506	467940000	35				294	54;368;388;965;1145;1256;1274;1386;1428;1741;1769	True;True;True;True;True;True;True;True;True;True;True	57;377;397;977;1159;1273;1291;1404;1446;1760;1789	109;110;696;697;733;734;1768;1769;2107;2325;2351;2545;2546;2622;2623;3175;3176;3225;3226	316;317;1690;1691;1692;1693;1763;1764;1765;3672;3673;3674;3675;4315;4731;4775;5128;5129;5130;5131;5132;5133;5134;5279;5280;6256;6257;6258;6259;6373;6374;6375;6376;6377;6378	316;1690;1763;3674;4315;4731;4775;5133;5280;6257;6374
tr|Q9I003|Q9I003_PSEAE	tr|Q9I003|Q9I003_PSEAE	1	1	1	>tr|Q9I003|Q9I003_PSEAE ATP-dependent RNA helicase DeaD OS=Pseudomonas aeruginosa (strain ATCC 15692 / PAO1 / 1C / PRS 101 / LMG 12228) GN=deaD PE=3 SV=1	1	1	1	1	2.3	2.3	2.3	62.107	567	567	0	1.4073	7629600	2				295	1	TRUE	1	2;3	2;3	2
tr|Q9I015|Q9I015_PSEAE	tr|Q9I015|Q9I015_PSEAE	3	3	3	>tr|Q9I015|Q9I015_PSEAE Probable aminotransferase OS=Pseudomonas aeruginosa (strain ATCC 15692 / PAO1 / 1C / PRS 101 / LMG 12228) GN=PA2828 PE=4 SV=1	1	3	3	3	12.4	12.4	12.4	44.799	403	403	0	2.0746	11916000	3				296	197;1047;1265	True;True;True	202;1060;1282	365;1931;1932;2337	896;3985;3986;4744	896;3985;4744
tr|Q9I028|Q9I028_PSEAE	tr|Q9I028|Q9I028_PSEAE	13	13	13	>tr|Q9I028|Q9I028_PSEAE Probable acyl-CoA dehydrogenase OS=Pseudomonas aeruginosa (strain ATCC 15692 / PAO1 / 1C / PRS 101 / LMG 12228) GN=PA2815 PE=4 SV=1	1	13	13	13	27.2	27.2	27.2	88.762	815	815	0	36.464	214880000	28				297	47;315;334;438;614;766;968;1153;1412;1734;1735;1778;1893	True;True;True;True;True;True;True;True;True;True;True;True;True	50;324;343;447;625;777;980;1168;1430;1753;1754;1798;1913	99;604;605;640;641;822;1138;1398;1777;2122;2123;2594;3164;3165;3166;3242;3440;3441	299;1527;1528;1529;1589;1590;1591;1592;1936;1937;2502;2982;3702;4349;4350;4351;5241;6243;6244;6245;6417;6827;6828;6829;6830;6831;6832;6833	299;1529;1591;1936;2502;2982;3702;4351;5241;6243;6245;6417;6828
tr|Q9I0B5|Q9I0B5_PSEAE	tr|Q9I0B5|Q9I0B5_PSEAE	1	1	1	>tr|Q9I0B5|Q9I0B5_PSEAE Uncharacterized protein OS=Pseudomonas aeruginosa (strain ATCC 15692 / PAO1 / 1C / PRS 101 / LMG 12228) GN=PA2727 PE=4 SV=1	1	1	1	1	0.7	0.7	0.7	134.43	1210	1210	1	-2	4885500	0	+			298	872	TRUE	884	1594	3352	3352	22	1024
tr|Q9I0F9|Q9I0F9_PSEAE	tr|Q9I0F9|Q9I0F9_PSEAE	1	1	1	>tr|Q9I0F9|Q9I0F9_PSEAE Uncharacterized protein OS=Pseudomonas aeruginosa (strain ATCC 15692 / PAO1 / 1C / PRS 101 / LMG 12228) GN=PA2679 PE=4 SV=1	1	1	1	1	12	12	12	27.641	250	250	0.0084507	0.66824	2054900	1				299	1621	TRUE	1640	2969	5915	5915
tr|Q9I0L4|Q9I0L4_PSEAE	tr|Q9I0L4|Q9I0L4_PSEAE	17	17	17	>tr|Q9I0L4|Q9I0L4_PSEAE Isocitrate dehydrogenase OS=Pseudomonas aeruginosa (strain ATCC 15692 / PAO1 / 1C / PRS 101 / LMG 12228) GN=idh PE=4 SV=1	1	17	17	17	37.8	37.8	37.8	81.633	741	741	0	56.157	490620000	46				300	158;235;345;549;589;619;714;807;860;930;1067;1191;1570;1743;1756;1817;1844	True;True;True;True;True;True;True;True;True;True;True;True;True;True;True;True;True	162;241;354;560;600;630;725;818;872;942;1081;1206;1588;1762;1776;1837;1864	288;437;438;657;658;1019;1020;1088;1089;1147;1148;1311;1312;1462;1463;1564;1565;1566;1567;1706;1707;1967;1968;2190;2881;3179;3205;3310;3357	762;1006;1007;1008;1615;1616;1617;1618;1619;1620;1621;1622;1623;1624;1625;2291;2292;2293;2398;2399;2524;2525;2814;2815;3069;3070;3071;3072;3299;3300;3301;3302;3303;3304;3560;3561;3562;3563;3564;4051;4052;4053;4446;5762;6262;6343;6530;6598	762;1006;1621;2293;2399;2524;2814;3070;3302;3563;4053;4446;5762;6262;6343;6530;6598
tr|Q9I0L5|Q9I0L5_PSEAE	tr|Q9I0L5|Q9I0L5_PSEAE	19	19	19	>tr|Q9I0L5|Q9I0L5_PSEAE Isocitrate dehydrogenase [NADP] OS=Pseudomonas aeruginosa (strain ATCC 15692 / PAO1 / 1C / PRS 101 / LMG 12228) GN=icd PE=3 SV=1	1	19	19	19	51.4	51.4	51.4	45.577	418	418	0	81.992	1575100000	140				301	155;221;266;341;347;428;513;532;649;711;730;859;888;895;1279;1470;1606;1750;1840	True;True;True;True;True;True;True;True;True;True;True;True;True;True;True;True;True;True;True	159;227;273;350;356;437;523;543;660;722;741;871;900;907;1296;1297;1488;1625;1769;1770;1860	283;284;410;411;412;498;499;651;652;660;661;805;955;956;992;1198;1199;1305;1306;1307;1339;1563;1621;1634;1635;1636;1637;2358;2359;2360;2361;2362;2695;2696;2945;2946;3190;3191;3192;3193;3194;3195;3196;3197;3350;3351	754;755;756;757;958;959;960;961;962;963;964;965;1166;1167;1168;1169;1170;1171;1172;1173;1605;1606;1607;1608;1627;1628;1629;1630;1901;1902;2183;2184;2247;2601;2602;2603;2604;2806;2807;2808;2809;2810;2852;2853;3298;3401;3420;3421;3422;3423;4784;4785;4786;4787;4788;4789;4790;4791;4792;4793;4794;4795;4796;4797;4798;4799;4800;4801;4802;4803;4804;4805;4806;4807;4808;4809;4810;5403;5404;5872;5873;5874;5…	755;962;1171;1605;1629;1901;2183;2247;2604;2809;2852;3298;3401;3423;4796;5403;5876;6286;6588	23;24	47;364
tr|Q9I0L8|Q9I0L8_PSEAE	tr|Q9I0L8|Q9I0L8_PSEAE	1	1	1	>tr|Q9I0L8|Q9I0L8_PSEAE ATP-binding protease component ClpA OS=Pseudomonas aeruginosa (strain ATCC 15692 / PAO1 / 1C / PRS 101 / LMG 12228) GN=clpA PE=3 SV=1	1	1	1	1	3.7	3.7	3.7	84.01	758	758	0	3.9173	10744000	9				302	865	TRUE	877	1576;1577;1578	3318;3319;3320;3321;3322;3323;3324;3325;3326	3319
tr|Q9I0T1|Q9I0T1_PSEAE	tr|Q9I0T1|Q9I0T1_PSEAE	13	13	13	>tr|Q9I0T1|Q9I0T1_PSEAE Probable acyl-CoA thiolase OS=Pseudomonas aeruginosa (strain ATCC 15692 / PAO1 / 1C / PRS 101 / LMG 12228) GN=PA2553 PE=3 SV=1	1	13	13	13	42.9	42.9	42.9	41.4	396	396	0	52.889	556930000	40				303	337;360;366;382;523;603;623;878;1109;1316;1576;1586;1713	True;True;True;True;True;True;True;True;True;True;True;True;True	346;369;375;391;534;614;634;890;1123;1334;1594;1605;1732	644;645;682;683;694;722;979;980;1114;1115;1116;1155;1156;1603;1604;1605;2036;2037;2428;2891;2892;2910;2911;3130	1596;1597;1598;1599;1668;1669;1670;1671;1687;1732;1733;1734;2228;2229;2230;2441;2442;2443;2444;2539;2540;2541;2542;2543;3367;3368;3369;3370;3371;3372;3373;4175;4176;4177;4939;5779;5780;5781;5782;5783;5808;5809;6196	1596;1671;1687;1733;2229;2444;2540;3368;4175;4939;5779;5809;6196
tr|Q9I0T2|Q9I0T2_PSEAE	tr|Q9I0T2|Q9I0T2_PSEAE	3	3	3	>tr|Q9I0T2|Q9I0T2_PSEAE Probable acyl-CoA dehydrogenase OS=Pseudomonas aeruginosa (strain ATCC 15692 / PAO1 / 1C / PRS 101 / LMG 12228) GN=PA2552 PE=3 SV=1	1	3	3	3	9.9	9.9	9.9	40.908	375	375	0	4.0372	33024000	4				304	615;724;969	True;True;True	626;735;981	1139;1328;1329;1778	2503;2832;2833;3703	2503;2833;3703
tr|Q9I0U4|Q9I0U4_PSEAE	tr|Q9I0U4|Q9I0U4_PSEAE	1	1	1	>tr|Q9I0U4|Q9I0U4_PSEAE Uncharacterized protein OS=Pseudomonas aeruginosa (strain ATCC 15692 / PAO1 / 1C / PRS 101 / LMG 12228) GN=PA2540 PE=4 SV=1	1	1	1	1	4.3	4.3	4.3	65.396	586	586	0.0083565	0.61201	4031600	1				305	1805	TRUE	1825	3288	6491	6491
tr|Q9I1B3|Q9I1B3_PSEAE	tr|Q9I1B3|Q9I1B3_PSEAE	1	1	1	>tr|Q9I1B3|Q9I1B3_PSEAE Uricase PuuD OS=Pseudomonas aeruginosa (strain ATCC 15692 / PAO1 / 1C / PRS 101 / LMG 12228) GN=PA2366 PE=4 SV=1	1	1	1	1	2.4	2.4	2.4	55.042	494	494	0.0083799	0.61745	73837	1				306	1142	TRUE	1156	2103	4303	4303
tr|Q9I1F5|Q9I1F5_PSEAE	tr|Q9I1F5|Q9I1F5_PSEAE	1	1	1	>tr|Q9I1F5|Q9I1F5_PSEAE Probable glyceraldehyde-3-phosphate dehydrogenase OS=Pseudomonas aeruginosa (strain ATCC 15692 / PAO1 / 1C / PRS 101 / LMG 12228) GN=PA2323 PE=3 SV=1	1	1	1	1	4.4	4.4	4.4	59.96	541	541	0	3.2107	16734000	6				307	1366	TRUE	1384	2507;2508;2509;2510	5072;5073;5074;5075;5076;5077	5072
tr|Q9I1H3|Q9I1H3_PSEAE	tr|Q9I1H3|Q9I1H3_PSEAE	21	21	21	>tr|Q9I1H3|Q9I1H3_PSEAE AmbE OS=Pseudomonas aeruginosa (strain ATCC 15692 / PAO1 / 1C / PRS 101 / LMG 12228) GN=ambE PE=4 SV=1	1	21	21	21	15.9	15.9	15.9	229.04	2124	2124	0	51.666	331520000	34				308	2;17;30;61;182;429;433;461;692;900;943;1024;1054;1056;1294;1351;1397;1637;1649;1902;1911	True;True;True;True;True;True;True;True;True;True;True;True;True;True;True;True;True;True;True;True;True	2;18;31;64;186;438;442;470;703;912;955;1036;1067;1069;1312;1369;1415;1656;1668;1922;1931	4;5;29;50;120;332;333;806;807;816;861;862;1271;1272;1648;1728;1885;1886;1946;1948;2389;2390;2484;2485;2569;2996;2997;3014;3015;3454;3455;3468;3469	4;5;43;86;87;332;840;841;1903;1904;1930;1983;1984;2752;2753;3439;3593;3899;3900;4011;4013;4014;4868;4869;5030;5031;5182;5971;5972;5992;5993;5994;5995;6855;6856;6873;6874	5;43;86;332;840;1904;1930;1983;2752;3439;3593;3899;4011;4013;4869;5031;5182;5971;5993;6855;6874
tr|Q9I1N7|Q9I1N7_PSEAE	tr|Q9I1N7|Q9I1N7_PSEAE	5	5	5	>tr|Q9I1N7|Q9I1N7_PSEAE PslB OS=Pseudomonas aeruginosa (strain ATCC 15692 / PAO1 / 1C / PRS 101 / LMG 12228) GN=pslB PE=3 SV=1	1	5	5	5	15.2	15.2	15.2	53.515	488	488	0	14.729	57280000	7				309	66;418;538;901;1418	True;True;True;True;True	69;427;549;913;1436	126;788;789;1001;1649;2604;2605	342;1875;1876;2259;3440;3441;5256;5257	342;1875;2259;3440;5257
tr|Q9I1Z6|Q9I1Z6_PSEAE	tr|Q9I1Z6|Q9I1Z6_PSEAE	4	4	4	>tr|Q9I1Z6|Q9I1Z6_PSEAE Alcohol dehydrogenase (Zn-dependent) OS=Pseudomonas aeruginosa (strain ATCC 15692 / PAO1 / 1C / PRS 101 / LMG 12228) GN=PA2119 PE=3 SV=1	1	4	4	4	20.8	20.8	20.8	38.561	366	366	0	7.4039	105430000	7				310	749;934;990;1728	True;True;True;True	760;946;1002;1747	1369;1714;1821;1822;3152;3153	2923;3578;3783;3784;6227;6228;6229	2923;3578;3784;6229
tr|Q9I246|Q9I246_PSEAE	tr|Q9I246|Q9I246_PSEAE	13	13	13	>tr|Q9I246|Q9I246_PSEAE Probable carbamoyl transferase OS=Pseudomonas aeruginosa (strain ATCC 15692 / PAO1 / 1C / PRS 101 / LMG 12228) GN=PA2069 PE=4 SV=1	1	13	13	13	28.6	28.6	28.6	63.382	574	574	0	46.157	333360000	51				311	36;269;427;448;521;559;713;731;854;1029;1298;1427;1433	True;True;True;True;True;True;True;True;True;True;True;True;True	37;276;436;457;531;570;724;742;866;1041;1316;1445;1451	59;503;504;803;804;836;973;974;1037;1038;1310;1340;1552;1553;1894;1895;2395;2396;2397;2619;2620;2621;2631	99;1177;1178;1179;1180;1181;1899;1900;1952;2208;2209;2210;2211;2324;2325;2813;2854;3273;3274;3275;3276;3915;3916;3917;3918;3919;3920;3921;4875;4876;4877;4878;4879;4880;4881;4882;4883;4884;4885;4886;4887;4888;4889;4890;5273;5274;5275;5276;5277;5278;5293	99;1177;1899;1952;2209;2324;2813;2854;3273;3916;4876;5277;5293
tr|Q9I296|Q9I296_PSEAE	tr|Q9I296|Q9I296_PSEAE	1	1	1	>tr|Q9I296|Q9I296_PSEAE Putative isovaleryl-CoA dehydrogenase OS=Pseudomonas aeruginosa (strain ATCC 15692 / PAO1 / 1C / PRS 101 / LMG 12228) GN=liuA PE=3 SV=1	1	1	1	1	3.9	3.9	3.9	42.209	387	387	0.0029586	0.96144	7318900	0				312	1323	TRUE	1341	2440	4958	4958
tr|Q9I297|Q9I297_PSEAE	tr|Q9I297|Q9I297_PSEAE	4	4	4	>tr|Q9I297|Q9I297_PSEAE Methylcrotonyl-CoA carboxylase, beta-subunit OS=Pseudomonas aeruginosa (strain ATCC 15692 / PAO1 / 1C / PRS 101 / LMG 12228) GN=liuB PE=1 SV=1	1	4	4	4	11.4	11.4	11.4	57.433	535	535	0	13.381	39111000	4				313	93;183;435;778	True;True;True;True	96;187;444;789	171;334;818;1419;1420	462;842;1932;3009;3010	462;842;1932;3010
tr|Q9I299|Q9I299_PSEAE	tr|Q9I299|Q9I299_PSEAE	6	6	6	>tr|Q9I299|Q9I299_PSEAE Methylcrotonyl-CoA carboxylase, alpha-subunit (Biotin-containing) OS=Pseudomonas aeruginosa (strain ATCC 15692 / PAO1 / 1C / PRS 101 / LMG 12228) GN=liuD PE=1 SV=1	1	6	6	6	14	14	14	71.282	655	655	0	7.1329	41790000	6				314	350;567;779;804;1136;1810	True;True;True;True;True;True	359;578;790;815;1150;1830	665;1049;1421;1459;2092;3297	1638;1639;2339;3011;3066;4279;6506	1639;2339;3011;3066;4279;6506
tr|Q9I2A9|Q9I2A9_PSEAE	tr|Q9I2A9|Q9I2A9_PSEAE	1	1	1	>tr|Q9I2A9|Q9I2A9_PSEAE DhcB, dehydrocarnitine CoA transferase, subunit B OS=Pseudomonas aeruginosa (strain ATCC 15692 / PAO1 / 1C / PRS 101 / LMG 12228) GN=dhcB PE=4 SV=1	1	1	1	1	11	11	11	23.187	218	218	0	3.07	11676000	4				315	639	TRUE	650	1182;1183	2581;2582;2583;2584	2581
tr|Q9I2R2|Q9I2R2_PSEAE	tr|Q9I2R2|Q9I2R2_PSEAE	3	3	3	>tr|Q9I2R2|Q9I2R2_PSEAE Probable oxidoreductase OS=Pseudomonas aeruginosa (strain ATCC 15692 / PAO1 / 1C / PRS 101 / LMG 12228) GN=PA1833 PE=4 SV=1	1	3	3	3	13.9	13.9	13.9	34.551	330	330	0	6.3656	50103000	4				316	391;680;997	True;True;True	400;691;1009	738;739;1248;1833	1769;1770;1771;2685;3800	1771;2685;3800
tr|Q9I2T9|Q9I2T9_PSEAE	tr|Q9I2T9|Q9I2T9_PSEAE	2	2	2	>tr|Q9I2T9|Q9I2T9_PSEAE Lon protease OS=Pseudomonas aeruginosa (strain ATCC 15692 / PAO1 / 1C / PRS 101 / LMG 12228) GN=lon PE=2 SV=1	1	2	2	2	4	4	4	88.646	798	798	0	5.9928	20407000	6				317	1170;1537	True;True	1185;1555	2153;2826;2827;2828;2829	4396;5682;5683;5684;5685;5686	4396;5685
tr|Q9I2V3|Q9I2V3_PSEAE	tr|Q9I2V3|Q9I2V3_PSEAE	1	1	1	>tr|Q9I2V3|Q9I2V3_PSEAE Uncharacterized protein OS=Pseudomonas aeruginosa (strain ATCC 15692 / PAO1 / 1C / PRS 101 / LMG 12228) GN=PA1789 PE=1 SV=1	1	1	1	1	5.2	5.2	5.2	31.273	287	287	0	1.4197	7791300	1				318	798	TRUE	809	1452	3050	3050
tr|Q9I2W9|Q9I2W9_PSEAE	tr|Q9I2W9|Q9I2W9_PSEAE	22	22	22	>tr|Q9I2W9|Q9I2W9_PSEAE Phosphoenolpyruvate synthase OS=Pseudomonas aeruginosa (strain ATCC 15692 / PAO1 / 1C / PRS 101 / LMG 12228) GN=ppsA PE=3 SV=1	1	22	22	22	37.8	37.8	37.8	85.816	791	791	0	74.491	573130000	55				319	72;144;453;471;721;780;820;950;993;1107;1113;1137;1140;1230;1244;1285;1304;1451;1552;1655;1697;1777	True;True;True;True;True;True;True;True;True;True;True;True;True;True;True;True;True;True;True;True;True;True	75;148;462;481;732;791;832;962;1005;1121;1127;1151;1154;1247;1261;1303;1322;1469;1570;1674;1716;1797	139;140;267;268;269;846;847;881;882;1324;1325;1422;1487;1488;1738;1827;2034;2043;2044;2093;2094;2099;2282;2304;2305;2374;2375;2405;2406;2664;2851;2852;2853;3023;3100;3101;3240;3241	384;385;386;387;388;389;390;734;735;736;737;738;739;1965;1966;2035;2036;2827;2828;2829;3012;3114;3115;3116;3606;3791;4173;4186;4187;4188;4189;4190;4280;4281;4282;4295;4664;4696;4697;4837;4838;4899;4900;5355;5715;5716;5717;5718;5719;5720;6006;6143;6144;6413;6414;6415;6416	388;735;1966;2036;2828;3012;3115;3606;3791;4173;4190;4281;4295;4664;4696;4837;4900;5355;5717;6006;6143;6413
tr|Q9I2Z1|Q9I2Z1_PSEAE	tr|Q9I2Z1|Q9I2Z1_PSEAE	3	3	3	>tr|Q9I2Z1|Q9I2Z1_PSEAE Uncharacterized protein OS=Pseudomonas aeruginosa (strain ATCC 15692 / PAO1 / 1C / PRS 101 / LMG 12228) GN=PA1746 PE=4 SV=1	1	3	3	3	36.9	36.9	36.9	18.189	168	168	0	12.65	154820000	11				320	180;209;452	True;True;True	184;215;461	329;386;387;388;842;843;844;845	836;837;921;922;923;1959;1960;1961;1962;1963;1964	837;923;1964
tr|Q9I2Z5|Q9I2Z5_PSEAE	tr|Q9I2Z5|Q9I2Z5_PSEAE	1	1	1	>tr|Q9I2Z5|Q9I2Z5_PSEAE Probable amidotransferase OS=Pseudomonas aeruginosa (strain ATCC 15692 / PAO1 / 1C / PRS 101 / LMG 12228) GN=PA1742 PE=4 SV=1	1	1	1	1	5.8	5.8	5.8	27.361	240	240	0	7.354	8287000	1				321	44	TRUE	47	95	292	292
tr|Q9I367|Q9I367_PSEAE	tr|Q9I367|Q9I367_PSEAE	2	2	2	>tr|Q9I367|Q9I367_PSEAE Uncharacterized protein OS=Pseudomonas aeruginosa (strain ATCC 15692 / PAO1 / 1C / PRS 101 / LMG 12228) GN=PA1658 PE=4 SV=1	1	2	2	2	5.1	5.1	5.1	55.56	491	491	0	9.3855	20819000	4				322	1373;1578	True;True	1391;1596	2518;2519;2895;2896	5090;5091;5786;5787	5091;5787
tr|Q9I3B2|Q9I3B2_PSEAE	tr|Q9I3B2|Q9I3B2_PSEAE	5	5	5	>tr|Q9I3B2|Q9I3B2_PSEAE Beta-ketoacyl-ACP synthase I OS=Pseudomonas aeruginosa (strain ATCC 15692 / PAO1 / 1C / PRS 101 / LMG 12228) GN=fabB PE=3 SV=1	1	5	5	5	19	19	19	42.806	405	405	0	24.617	182620000	15				323	324;454;516;518;945	True;True;True;True;True	333;463;526;528;957	620;621;848;961;962;963;965;966;1731	1546;1547;1548;1549;1550;1967;2190;2191;2192;2193;2195;2196;2197;2198;3598;3599	1546;1967;2192;2195;3598
tr|Q9I3D3|Q9I3D3_PSEAE	tr|Q9I3D3|Q9I3D3_PSEAE	21	21	21	>tr|Q9I3D3|Q9I3D3_PSEAE 2-oxoglutarate dehydrogenase (E1 subunit) OS=Pseudomonas aeruginosa (strain ATCC 15692 / PAO1 / 1C / PRS 101 / LMG 12228) GN=sucA PE=4 SV=1	1	21	21	21	32.4	32.4	32.4	105.88	943	943	0	74.007	1320400000	137				324	195;254;264;276;291;398;422;489;605;631;732;751;869;890;916;1052;1053;1096;1144;1183;1472	True;True;True;True;True;True;True;True;True;True;True;True;True;True;True;True;True;True;True;True;True	200;261;271;283;298;407;431;499;616;642;743;762;881;902;928;1065;1066;1110;1158;1198;1490	359;360;361;472;473;494;495;518;519;543;544;545;749;793;794;795;796;913;914;915;916;1120;1171;1172;1341;1372;1373;1374;1586;1587;1624;1677;1678;1679;1680;1681;1940;1941;1942;1943;1944;1945;2016;2106;2176;2177;2698;2699	884;885;886;1075;1076;1156;1157;1158;1159;1160;1161;1162;1163;1211;1212;1213;1243;1244;1245;1785;1880;1881;1882;1883;1884;1885;1886;1887;2084;2085;2086;2087;2088;2089;2090;2091;2092;2093;2094;2095;2096;2097;2098;2099;2100;2101;2102;2103;2104;2105;2106;2107;2108;2109;2110;2450;2564;2565;2566;2567;2855;2926;2927;2928;2929;2930;2931;2932;2933;2934;2935;2936;2937;2938;2939;2940;2941;3335;3336;3404;34…	884;1075;1161;1212;1244;1785;1881;2091;2450;2564;2855;2932;3336;3404;3492;4001;4006;4139;4312;4426;5407
tr|Q9I3D4|Q9I3D4_PSEAE	tr|Q9I3D4|Q9I3D4_PSEAE	7	7	7	>tr|Q9I3D4|Q9I3D4_PSEAE Succinate dehydrogenase (B subunit) OS=Pseudomonas aeruginosa (strain ATCC 15692 / PAO1 / 1C / PRS 101 / LMG 12228) GN=sdhB PE=4 SV=1	1	7	7	7	32.8	32.8	32.8	26.155	235	235	0	18.608	426340000	33				325	436;503;925;1080;1118;1189;1704	True;True;True;True;True;True;True	445;513;937;1094;1132;1204;1723	819;820;937;938;1698;1699;1990;2060;2061;2062;2063;2064;2187;2188;3113;3114;3115	1933;1934;2140;2141;2142;2143;2144;2145;2146;2147;2148;3538;3539;3540;3541;3542;3543;3544;3545;3546;3547;3548;4098;4233;4234;4235;4236;4237;4443;4444;6163;6164;6165	1933;2141;3539;4098;4233;4443;6164
tr|Q9I3D5|Q9I3D5_PSEAE	tr|Q9I3D5|Q9I3D5_PSEAE	17	17	17	>tr|Q9I3D5|Q9I3D5_PSEAE Succinate dehydrogenase flavoprotein subunit OS=Pseudomonas aeruginosa (strain ATCC 15692 / PAO1 / 1C / PRS 101 / LMG 12228) GN=sdhA PE=3 SV=1	1	17	17	17	36.8	36.8	36.8	63.531	590	590	0	80.835	1047500000	93				326	16;244;456;555;569;607;742;743;879;884;938;978;1251;1533;1561;1588;1845	True;True;True;True;True;True;True;True;True;True;True;True;True;True;True;True;True	17;251;465;566;580;618;753;754;891;896;950;990;1268;1551;1579;1607;1865	28;454;455;852;853;1028;1029;1052;1053;1122;1123;1357;1358;1359;1360;1361;1362;1606;1607;1615;1719;1720;1721;1796;1797;1798;1799;2316;2317;2820;2869;2870;2913;2914;2915;3358;3359;3360	42;1038;1039;1972;1973;2305;2306;2307;2308;2309;2342;2343;2453;2454;2455;2456;2457;2458;2459;2460;2461;2880;2881;2882;2883;2884;2885;2886;2887;2888;2889;2890;2891;2892;2893;2894;2895;2896;2897;2898;2899;2900;2901;2902;2903;2904;2905;2906;2907;2908;2909;2910;2911;2912;2913;2914;2915;2916;3374;3375;3376;3377;3378;3387;3583;3584;3585;3731;3732;3733;3734;3735;3736;3737;3738;3739;3740;3741;3742;3743;3…	42;1038;1972;2305;2343;2454;2882;2914;3377;3387;3585;3741;4717;5674;5749;5811;6600
tr|Q9I3G0|Q9I3G0_PSEAE	tr|Q9I3G0|Q9I3G0_PSEAE	2	2	2	>tr|Q9I3G0|Q9I3G0_PSEAE Cytochrome c oxidase, cbb3-type, CcoN subunit OS=Pseudomonas aeruginosa (strain ATCC 15692 / PAO1 / 1C / PRS 101 / LMG 12228) GN=ccoN2 PE=3 SV=1	1	2	2	2	6.1	6.1	6.1	53.09	475	475	0	4.7934	97064000	6				327	1479;1605	True;True	1497;1624	2714;2715;2943;2944	5441;5442;5443;5444;5870;5871	5441;5870
tr|Q9I3G1|Q9I3G1_PSEAE;tr|Q9I3G4|Q9I3G4_PSEAE	tr|Q9I3G1|Q9I3G1_PSEAE	3;1	3;1	3;1	>tr|Q9I3G1|Q9I3G1_PSEAE Cytochrome c oxidase, cbb3-type, CcoO subunit OS=Pseudomonas aeruginosa (strain ATCC 15692 / PAO1 / 1C / PRS 101 / LMG 12228) GN=ccoO2 PE=4 SV=1	2	3	3	3	20.3	20.3	20.3	22.778	202	202;203	0	7.5818	122900000	15				328	1199;1521;1555	True;True;True	1214;1539;1573	2205;2206;2789;2790;2791;2792;2858;2859	4468;4469;4470;4471;4472;4473;4474;4475;5587;5588;5589;5590;5591;5726;5727	4468;5591;5727
tr|Q9I3G2|Q9I3G2_PSEAE	tr|Q9I3G2|Q9I3G2_PSEAE	6	6	6	>tr|Q9I3G2|Q9I3G2_PSEAE Cbb3-type cytochrome c oxidase subunit OS=Pseudomonas aeruginosa (strain ATCC 15692 / PAO1 / 1C / PRS 101 / LMG 12228) GN=ccoP2 PE=3 SV=1	1	6	6	6	31.8	31.8	31.8	33.812	308	308	0	19.232	202550000	12				329	551;662;678;1328;1842;1856	True;True;True;True;True;True	562;673;689;1346;1862;1876	1022;1023;1220;1244;1245;2446;2447;3354;3355;3374	2295;2296;2297;2298;2299;2300;2642;2681;2682;4964;4965;6595;6596;6621	2298;2642;2682;4965;6595;6621
tr|Q9I3G3|Q9I3G3_PSEAE	tr|Q9I3G3|Q9I3G3_PSEAE	2	2	2	>tr|Q9I3G3|Q9I3G3_PSEAE Cytochrome c oxidase, cbb3-type, CcoN subunit OS=Pseudomonas aeruginosa (strain ATCC 15692 / PAO1 / 1C / PRS 101 / LMG 12228) GN=ccoN1 PE=3 SV=1	1	2	2	2	8.4	8.4	8.4	53.108	475	475	0	2.8655	65485000	3				330	12;236	True;True	13;242	22;23;439	32;33;1009	32;1009
tr|Q9I3G6|Q9I3G6_PSEAE	tr|Q9I3G6|Q9I3G6_PSEAE	3	3	3	>tr|Q9I3G6|Q9I3G6_PSEAE Probable ferredoxin OS=Pseudomonas aeruginosa (strain ATCC 15692 / PAO1 / 1C / PRS 101 / LMG 12228) GN=PA1551 PE=4 SV=1	1	3	3	3	13.8	13.8	13.8	53.62	471	471	0	2.6432	95583000	9				331	318;1338;1615	True;True;True	327;1356;1634	610;2464;2465;2958;2959	1534;4995;4996;5894;5895;5896;5897;5898;5899;5900	1534;4995;5897
tr|Q9I3I1|Q9I3I1_PSEAE	tr|Q9I3I1|Q9I3I1_PSEAE	1	1	1	>tr|Q9I3I1|Q9I3I1_PSEAE DNA polymerase subunits gamma and tau OS=Pseudomonas aeruginosa (strain ATCC 15692 / PAO1 / 1C / PRS 101 / LMG 12228) GN=dnaX PE=4 SV=1	1	1	1	1	2.2	2.2	2.2	73.309	681	681	0	1.2534	3942600	1				332	1299	TRUE	1317	2398	4891	4891
tr|Q9I3X2|Q9I3X2_PSEAE	tr|Q9I3X2|Q9I3X2_PSEAE	6	6	6	>tr|Q9I3X2|Q9I3X2_PSEAE Uncharacterized protein OS=Pseudomonas aeruginosa (strain ATCC 15692 / PAO1 / 1C / PRS 101 / LMG 12228) GN=PA1372 PE=4 SV=1	1	6	6	6	11.3	11.3	11.3	79.82	711	711	0	11.695	53618000	7				333	18;867;957;1200;1257;1264	True;True;True;True;True;True	19;879;969;1215;1274;1281	30;1582;1583;1751;2207;2326;2336	44;45;3331;3332;3628;4476;4732;4743	44;3332;3628;4476;4732;4743
tr|Q9I4I1|Q9I4I1_PSEAE	tr|Q9I4I1|Q9I4I1_PSEAE	16	16	16	>tr|Q9I4I1|Q9I4I1_PSEAE Ribonucleoside-diphosphate reductase OS=Pseudomonas aeruginosa (strain ATCC 15692 / PAO1 / 1C / PRS 101 / LMG 12228) GN=nrdA PE=3 SV=1	1	16	16	16	26	26	26	107.11	963	963	0	42.306	220620000	25				334	49;319;469;545;636;1026;1204;1225;1284;1453;1463;1539;1658;1819;1847;1922	True;True;True;True;True;True;True;True;True;True;True;True;True;True;True;True	52;328;478;556;647;1038;1219;1242;1302;1471;1481;1557;1677;1839;1867;1942	102;611;876;1012;1178;1179;1889;2214;2268;2269;2373;2667;2668;2684;2832;3027;3028;3314;3315;3363;3483;3484	306;1535;1536;2013;2278;2577;2578;3907;4493;4617;4618;4835;4836;5358;5359;5385;5690;6010;6011;6536;6537;6538;6604;6892;6893;6894	306;1535;2013;2278;2578;3907;4493;4618;4835;5358;5385;5690;6011;6536;6604;6892
tr|Q9I4I2|Q9I4I2_PSEAE	tr|Q9I4I2|Q9I4I2_PSEAE	6	6	6	>tr|Q9I4I2|Q9I4I2_PSEAE Ribonucleoside-diphosphate reductase subunit beta OS=Pseudomonas aeruginosa (strain ATCC 15692 / PAO1 / 1C / PRS 101 / LMG 12228) GN=nrdB PE=3 SV=1	1	6	6	6	21.9	21.9	21.9	47.386	415	415	0	28	48791000	8				335	41;147;371;677;932;1211	True;True;True;True;True;True	42;151;380;688;944;1226	71;272;703;1243;1710;1711;2230	139;140;742;1702;2680;3568;3569;4517	140;742;1702;2680;3569;4517
tr|Q9I4Q5|Q9I4Q5_PSEAE	tr|Q9I4Q5|Q9I4Q5_PSEAE	2	2	2	>tr|Q9I4Q5|Q9I4Q5_PSEAE Uncharacterized protein OS=Pseudomonas aeruginosa (strain ATCC 15692 / PAO1 / 1C / PRS 101 / LMG 12228) GN=PA1069 PE=4 SV=1	1	2	2	2	4.2	4.2	4.2	86.114	764	764	0	6.724	11197000	3				336	796;1135	True;True	807;1149	1450;2091	3047;3048;4278	3047;4278
tr|Q9I4S1|Q9I4S1_PSEAE	tr|Q9I4S1|Q9I4S1_PSEAE	1	1	1	>tr|Q9I4S1|Q9I4S1_PSEAE Uncharacterized protein OS=Pseudomonas aeruginosa (strain ATCC 15692 / PAO1 / 1C / PRS 101 / LMG 12228) GN=PA1053 PE=4 SV=1	1	1	1	1	16.9	16.9	16.9	15.649	154	154	0	1.5341	1411900	2				337	661	TRUE	672	1219	2640;2641	2640
tr|Q9I4X1|Q9I4X1_PSEAE	tr|Q9I4X1|Q9I4X1_PSEAE	2	2	2	>tr|Q9I4X1|Q9I4X1_PSEAE PqsC OS=Pseudomonas aeruginosa (strain ATCC 15692 / PAO1 / 1C / PRS 101 / LMG 12228) GN=pqsC PE=1 SV=1	1	2	2	2	9.8	9.8	9.8	38.238	348	348	0	2.6731	20810000	6				338	87;1060	True;True	90;1074	163;1956;1957	445;446;447;4030;4031;4032	447;4032
tr|Q9I4X2|Q9I4X2_PSEAE	tr|Q9I4X2|Q9I4X2_PSEAE	3	3	3	>tr|Q9I4X2|Q9I4X2_PSEAE PqsB OS=Pseudomonas aeruginosa (strain ATCC 15692 / PAO1 / 1C / PRS 101 / LMG 12228) GN=pqsB PE=1 SV=1	1	3	3	3	15.9	15.9	15.9	30.5	283	283	0	4.3446	32098000	2				339	191;552;909	True;True;True	195;563;921	350;1024;1667;1668	869;2301;3469;3470	869;2301;3470
tr|Q9I522|Q9I522_PSEAE	tr|Q9I522|Q9I522_PSEAE	1	1	1	>tr|Q9I522|Q9I522_PSEAE Lipopolysaccharide biosynthetic protein LpxO2 OS=Pseudomonas aeruginosa (strain ATCC 15692 / PAO1 / 1C / PRS 101 / LMG 12228) GN=lpxO2 PE=4 SV=1	1	1	1	1	4.8	4.8	4.8	35.759	312	312	0.002924	0.89474	5018100	0				340	15	TRUE	16	27	41	41
tr|Q9I524|Q9I524_PSEAE	tr|Q9I524|Q9I524_PSEAE	2	2	2	>tr|Q9I524|Q9I524_PSEAE GTP pyrophosphokinase OS=Pseudomonas aeruginosa (strain ATCC 15692 / PAO1 / 1C / PRS 101 / LMG 12228) GN=relA PE=3 SV=1	1	2	2	2	2.3	2.3	2.3	83.815	747	747	0	2.1481	140580000	2				341	339;1719	True;True	348;1738	648;3137	1602;6205	1602;6205
tr|Q9I5F5|Q9I5F5_PSEAE	tr|Q9I5F5|Q9I5F5_PSEAE	1	1	1	>tr|Q9I5F5|Q9I5F5_PSEAE Sodium/proline symporter PutP OS=Pseudomonas aeruginosa (strain ATCC 15692 / PAO1 / 1C / PRS 101 / LMG 12228) GN=putP PE=3 SV=1	1	1	1	1	1.8	1.8	1.8	54.413	506	506	0	1.9129	1521500	1				342	476	TRUE	486	892	2054	2054
tr|Q9I5F6|Q9I5F6_PSEAE	tr|Q9I5F6|Q9I5F6_PSEAE	12	12	12	>tr|Q9I5F6|Q9I5F6_PSEAE Bifunctional protein PutA OS=Pseudomonas aeruginosa (strain ATCC 15692 / PAO1 / 1C / PRS 101 / LMG 12228) GN=putA PE=3 SV=1	1	12	12	12	13	13	13	115.63	1060	1060	0	33.43	203990000	19				343	260;837;1116;1243;1620;1675;1745;1755;1770;1784;1853;1857	True;True;True;True;True;True;True;True;True;True;True;True	267;849;1130;1260;1639;1694;1764;1775;1790;1804;1873;1877	483;484;1525;2057;2058;2303;2967;2968;3062;3181;3182;3204;3227;3252;3253;3371;3375	1093;1094;3219;4230;4231;4695;5913;5914;6078;6079;6264;6265;6342;6379;6434;6435;6436;6437;6618;6622	1094;3219;4231;4695;5913;6078;6264;6342;6379;6434;6618;6622
tr|Q9I5F9|Q9I5F9_PSEAE	tr|Q9I5F9|Q9I5F9_PSEAE	1	1	1	>tr|Q9I5F9|Q9I5F9_PSEAE Lon protease OS=Pseudomonas aeruginosa (strain ATCC 15692 / PAO1 / 1C / PRS 101 / LMG 12228) GN=lon PE=2 SV=1	1	1	1	1	4.4	4.4	4.4	88.574	799	799	0.0086455	0.78616	1212800	2				344	529	TRUE	540	989	2243;2244	2244
tr|Q9I5I4|Q9I5I4_PSEAE	tr|Q9I5I4|Q9I5I4_PSEAE	3	3	3	>tr|Q9I5I4|Q9I5I4_PSEAE Probable enoyl-CoA hydratase/isomerase OS=Pseudomonas aeruginosa (strain ATCC 15692 / PAO1 / 1C / PRS 101 / LMG 12228) GN=PA0745 PE=3 SV=1	1	3	3	3	12.5	12.5	12.5	29.904	272	272	0	9.7945	84604000	3				345	536;544;773	True;True;True	547;555;784	997;998;1011;1412;1413	2252;2253;2277;3002;3003	2253;2277;3003
tr|Q9I5I5|Q9I5I5_PSEAE	tr|Q9I5I5|Q9I5I5_PSEAE	2	2	2	>tr|Q9I5I5|Q9I5I5_PSEAE Probable enoyl-CoA hydratase/isomerase OS=Pseudomonas aeruginosa (strain ATCC 15692 / PAO1 / 1C / PRS 101 / LMG 12228) GN=PA0744 PE=4 SV=1	1	2	2	2	7.1	7.1	7.1	40.589	367	367	0	5.4824	18334000	3				346	768;1442	True;True	779;1460	1405;2648	2989;2990;5328	2990;5328
tr|Q9I5U9|Q9I5U9_PSEAE	tr|Q9I5U9|Q9I5U9_PSEAE	20	20	20	>tr|Q9I5U9|Q9I5U9_PSEAE Uncharacterized protein OS=Pseudomonas aeruginosa (strain ATCC 15692 / PAO1 / 1C / PRS 101 / LMG 12228) GN=PA0588 PE=4 SV=1	1	20	20	20	40.3	40.3	40.3	73.722	640	640	0	88.833	852480000	74				347	170;322;396;658;748;1012;1025;1030;1042;1143;1163;1192;1242;1282;1431;1514;1522;1762;1831;1916	True;True;True;True;True;True;True;True;True;True;True;True;True;True;True;True;True;True;True;True	174;331;405;669;759;1024;1037;1042;1055;1157;1178;1207;1259;1300;1449;1532;1540;1782;1851;1936	310;311;617;618;746;1213;1214;1215;1368;1863;1864;1865;1866;1887;1888;1896;1897;1898;1922;1923;2104;2105;2139;2140;2191;2192;2301;2302;2369;2370;2628;2778;2779;2793;2794;3213;3214;3333;3334;3335;3476	805;806;807;808;809;810;1542;1543;1544;1779;2631;2632;2633;2634;2635;2636;2922;3868;3869;3870;3871;3901;3902;3903;3904;3905;3906;3922;3923;3924;3925;3926;3969;3970;3971;3972;3973;4304;4305;4306;4307;4308;4309;4310;4373;4374;4375;4447;4448;4449;4450;4691;4692;4693;4694;4827;4828;4829;5289;5572;5573;5592;5593;5594;5595;6351;6352;6353;6354;6561;6562;6563;6564;6565;6885	806;1542;1779;2634;2922;3869;3901;3922;3969;4308;4374;4447;4692;4827;5289;5573;5592;6351;6563;6885
tr|Q9I5Y8|Q9I5Y8_PSEAE	tr|Q9I5Y8|Q9I5Y8_PSEAE	9	9	9	>tr|Q9I5Y8|Q9I5Y8_PSEAE Transketolase OS=Pseudomonas aeruginosa (strain ATCC 15692 / PAO1 / 1C / PRS 101 / LMG 12228) GN=tktA PE=1 SV=1	1	9	9	9	25.1	25.1	25.1	72.219	665	665	0	12.729	110070000	12				348	14;37;213;467;683;723;1360;1575;1705	True;True;True;True;True;True;True;True;True	15;38;219;476;694;734;1378;1593;1724	26;60;394;395;396;873;874;1254;1327;2498;2890;3116	40;100;930;931;932;2010;2011;2715;2831;5050;5051;5778;6166	40;100;930;2011;2715;2831;5051;5778;6166
tr|Q9I612|Q9I612_PSEAE	tr|Q9I612|Q9I612_PSEAE	3	3	3	>tr|Q9I612|Q9I612_PSEAE Probable acyl-CoA dehydrogenase OS=Pseudomonas aeruginosa (strain ATCC 15692 / PAO1 / 1C / PRS 101 / LMG 12228) GN=PA0506 PE=3 SV=1	1	3	3	3	6.3	6.3	6.3	65.358	601	601	0	1.8484	62565000	6				349	3;510;898	True;True;True	3;520;910	6;7;950;951;1644;1645	6;7;2174;2175;2176;2177;3435;3436	7;2175;3436
tr|Q9I654|Q9I654_PSEAE	tr|Q9I654|Q9I654_PSEAE	1	1	1	>tr|Q9I654|Q9I654_PSEAE Histidine kinase OS=Pseudomonas aeruginosa (strain ATCC 15692 / PAO1 / 1C / PRS 101 / LMG 12228) GN=creC PE=4 SV=1	1	1	1	1	3.2	3.2	3.2	52.302	474	474	0.003003	1.0503	339650000	7				350	591	TRUE	602	1092;1093;1094;1095	2402;2403;2404;2405;2406;2407;2408	2404
tr|Q9I659|Q9I659_PSEAE	tr|Q9I659|Q9I659_PSEAE	19	19	17	>tr|Q9I659|Q9I659_PSEAE Probable ClpA/B protease ATP binding subunit OS=Pseudomonas aeruginosa (strain ATCC 15692 / PAO1 / 1C / PRS 101 / LMG 12228) GN=PA0459 PE=4 SV=1	1	19	19	17	30.6	30.6	27.9	94.174	850	850	0	66.555	475190000	42				351	101;106;122;451;525;568;936;1003;1098;1216;1228;1275;1296;1370;1503;1634;1641;1693;1881	True;True;True;True;True;True;True;True;True;True;True;True;True;True;True;True;True;True;True	104;109;126;460;536;579;948;1015;1112;1232;1245;1292;1314;1388;1521;1653;1660;1712;1901	187;196;197;231;839;840;841;982;983;1050;1051;1716;1849;1850;2019;2020;2241;2242;2278;2279;2352;2353;2392;2515;2757;2758;2988;2989;3003;3092;3093;3421;3422	493;507;508;670;671;1955;1956;1957;1958;2232;2233;2234;2235;2340;2341;3580;3845;3846;4155;4156;4532;4533;4534;4535;4660;4661;4776;4777;4778;4871;5086;5522;5523;5524;5962;5963;5964;5981;6134;6135;6136;6801;6802;6803	493;507;671;1958;2232;2340;3580;3846;4155;4532;4660;4777;4871;5086;5523;5962;5981;6134;6802
tr|Q9I671|Q9I671_PSEAE	tr|Q9I671|Q9I671_PSEAE	6	6	6	>tr|Q9I671|Q9I671_PSEAE Glutaryl-CoA dehydrogenase OS=Pseudomonas aeruginosa (strain ATCC 15692 / PAO1 / 1C / PRS 101 / LMG 12228) GN=gcdH PE=3 SV=1	1	6	6	6	23.2	23.2	23.2	43.311	393	393	0	33.552	188520000	14				352	198;204;309;690;1301;1446	True;True;True;True;True;True	203;210;318;701;1319;1464	366;367;379;380;592;593;1268;1269;2400;2401;2654	897;898;899;912;913;914;915;1510;1511;2747;2748;4893;4894;4895;5339	897;914;1511;2748;4895;5339
tr|Q9I687|Q9I687_PSEAE	tr|Q9I687|Q9I687_PSEAE	4	4	4	>tr|Q9I687|Q9I687_PSEAE Methylenetetrahydrofolate reductase OS=Pseudomonas aeruginosa (strain ATCC 15692 / PAO1 / 1C / PRS 101 / LMG 12228) GN=metF PE=3 SV=1	1	4	4	4	19.7	19.7	19.7	32.228	290	290	0	7.0452	71877000	7				353	561;992;1562;1863	True;True;True;True	572;1004;1580;1883	1041;1825;1826;2871;3385;3386	2330;3788;3789;3790;5751;6640;6641;6642	2330;3789;5751;6642
tr|Q9I688|Q9I688_PSEAE	tr|Q9I688|Q9I688_PSEAE	1	1	1	>tr|Q9I688|Q9I688_PSEAE Uncharacterized protein OS=Pseudomonas aeruginosa (strain ATCC 15692 / PAO1 / 1C / PRS 101 / LMG 12228) GN=PA0429 PE=4 SV=1	1	1	1	1	6.7	6.7	6.7	40.872	356	356	0	1.5986	18450000	6				354	255	TRUE	262	474;475	1077;1078;1079;1080;1081;1082	1078
tr|Q9I689|Q9I689_PSEAE	tr|Q9I689|Q9I689_PSEAE	4	4	4	>tr|Q9I689|Q9I689_PSEAE ATP-dependent RNA helicase RhlE OS=Pseudomonas aeruginosa (strain ATCC 15692 / PAO1 / 1C / PRS 101 / LMG 12228) GN=rhlE PE=3 SV=1	1	4	4	4	9.9	9.9	9.9	70.111	639	639	0	16.307	57832000	8				355	46;227;256;814	True;True;True;True	49;233;263;825	98;421;422;476;477;1475	298;982;983;1083;1084;1085;1086;3092	298;983;1083;3092
tr|Q9I696|Q9I696_PSEAE	tr|Q9I696|Q9I696_PSEAE	2	2	2	>tr|Q9I696|Q9I696_PSEAE Component of chemotactic signal transduction system OS=Pseudomonas aeruginosa (strain ATCC 15692 / PAO1 / 1C / PRS 101 / LMG 12228) GN=chpA PE=4 SV=1	1	2	2	2	1.7	1.7	1.7	268.57	2472	2472	0	4.8951	8113100	4				356	1753;1809	True;True	1773;1829	3201;3295;3296	6333;6503;6504;6505	6333;6504
tr|Q9I6A0|Q9I6A0_PSEAE	tr|Q9I6A0|Q9I6A0_PSEAE	4	4	4	>tr|Q9I6A0|Q9I6A0_PSEAE Probable cystathionine gamma-lyase OS=Pseudomonas aeruginosa (strain ATCC 15692 / PAO1 / 1C / PRS 101 / LMG 12228) GN=PA0400 PE=3 SV=1	1	4	4	4	24.1	24.1	24.1	42.786	394	394	0	15.784	45409000	11				357	528;760;976;1095	True;True;True;True	539;771;988;1109	987;988;1389;1793;2014;2015	2239;2240;2241;2242;2967;3728;4134;4135;4136;4137;4138	2242;2967;3728;4134
tr|Q9I6D9|Q9I6D9_PSEAE	tr|Q9I6D9|Q9I6D9_PSEAE	1	1	1	>tr|Q9I6D9|Q9I6D9_PSEAE Uncharacterized protein OS=Pseudomonas aeruginosa (strain ATCC 15692 / PAO1 / 1C / PRS 101 / LMG 12228) GN=PA0354 PE=3 SV=1	1	1	1	1	4	4	4	43.77	398	398	0	2.5448	7536000	1				358	1131	TRUE	1145	2084	4265	4265
tr|Q9I6H5|Q9I6H5_PSEAE	tr|Q9I6H5|Q9I6H5_PSEAE	6	6	6	>tr|Q9I6H5|Q9I6H5_PSEAE D-3-phosphoglycerate dehydrogenase OS=Pseudomonas aeruginosa (strain ATCC 15692 / PAO1 / 1C / PRS 101 / LMG 12228) GN=serA PE=3 SV=1	1	6	6	6	20	20	20	44.216	409	409	0	21.592	161660000	13				359	11;506;717;1450;1481;1656	True;True;True;True;True;True	12;516;728;1468;1499;1675	20;21;941;942;1317;2662;2663;2717;3024	27;28;29;30;31;2151;2152;2820;5353;5354;5447;5448;6007	27;2152;2820;5353;5447;6007
tr|Q9I6J2|Q9I6J2_PSEAE	tr|Q9I6J2|Q9I6J2_PSEAE	2	2	2	>tr|Q9I6J2|Q9I6J2_PSEAE Putrescine aminotransferase OS=Pseudomonas aeruginosa (strain ATCC 15692 / PAO1 / 1C / PRS 101 / LMG 12228) GN=spuC PE=3 SV=1	1	2	2	2	9	9	9	50.452	456	456	0	3.3242	23770000	6				360	229;1852	True;True	235;1872	424;425;426;3370	985;986;987;988;989;6617	987;6617
tr|Q9I6J3|Q9I6J3_PSEAE	tr|Q9I6J3|Q9I6J3_PSEAE	4	4	4	>tr|Q9I6J3|Q9I6J3_PSEAE Probable glutamine synthetase OS=Pseudomonas aeruginosa (strain ATCC 15692 / PAO1 / 1C / PRS 101 / LMG 12228) GN=spuB PE=3 SV=1	1	4	4	4	14.8	14.8	14.8	50.965	452	452	0	2.8128	25666000	3				361	375;500;1066;1648	True;True;True;True	384;510;1080;1667	710;932;1966;3013	1710;2135;4050;5991	1710;2135;4050;5991
tr|Q9I6Z1|Q9I6Z1_PSEAE	tr|Q9I6Z1|Q9I6Z1_PSEAE	6	6	6	>tr|Q9I6Z1|Q9I6Z1_PSEAE Uncharacterized protein OS=Pseudomonas aeruginosa (strain ATCC 15692 / PAO1 / 1C / PRS 101 / LMG 12228) GN=PA0141 PE=4 SV=1	1	6	6	6	25.2	25.2	25.2	34.463	298	298	0	7.2779	75406000	7				362	722;1193;1312;1826;1892;1920	True;True;True;True;True;True	733;1208;1330;1846;1912;1940	1326;2193;2194;2419;3325;3439;3480	2830;4451;4452;4453;4930;6551;6826;6889	2830;4451;4930;6551;6826;6889
tr|Q9I6Z3|Q9I6Z3_PSEAE	tr|Q9I6Z3|Q9I6Z3_PSEAE	7	7	7	>tr|Q9I6Z3|Q9I6Z3_PSEAE Alkyl hydroperoxide reductase subunit C OS=Pseudomonas aeruginosa (strain ATCC 15692 / PAO1 / 1C / PRS 101 / LMG 12228) GN=ahpC PE=4 SV=1	1	7	7	7	50.8	50.8	50.8	20.541	187	187	0	11.665	209700000	16				363	190;497;665;1439;1548;1599;1830	True;True;True;True;True;True;True	194;507;676;1457;1566;1618;1850	348;349;926;927;1226;2642;2643;2846;2934;2935;3332	866;867;868;2121;2122;2123;2124;2653;5309;5310;5311;5312;5710;5859;5860;6560	868;2124;2653;5310;5710;5859;6560
tr|Q9I748|Q9I748_PSEAE	tr|Q9I748|Q9I748_PSEAE	5	5	5	>tr|Q9I748|Q9I748_PSEAE Uncharacterized protein OS=Pseudomonas aeruginosa (strain ATCC 15692 / PAO1 / 1C / PRS 101 / LMG 12228) GN=PA0084 PE=4 SV=1	1	5	5	5	16.7	16.7	16.7	55.771	498	498	0	22.398	110660000	14				364	60;763;1429;1516;1888	True;True;True;True;True	63;774;1447;1534;1908	118;119;1394;2624;2625;2781;3433;3434	327;328;329;330;331;2975;5281;5282;5283;5284;5285;5575;6818;6819	328;2975;5284;5575;6818
tr|Q9I762|Q9I762_PSEAE	tr|Q9I762|Q9I762_PSEAE	1	1	1	>tr|Q9I762|Q9I762_PSEAE Uncharacterized protein OS=Pseudomonas aeruginosa (strain ATCC 15692 / PAO1 / 1C / PRS 101 / LMG 12228) GN=PA0070 PE=4 SV=1	1	1	1	1	3.3	3.3	3.3	31.716	304	304	0	1.185	1537000	1				365	775	TRUE	786	1416	3006	3006

## Sheet: 3-1 proteinGroups Probe 12
Protein IDs	Majority protein IDs	Peptide counts (all)	Peptide counts (razor+unique)	Peptide counts (unique)	Fasta headers	Number of proteins	Peptides	Razor + unique peptides	Unique peptides	Sequence coverage [%]	Unique + razor sequence coverage [%]	Unique sequence coverage [%]	Mol. weight [kDa]	Sequence length	Sequence lengths	Q-value	Score	Intensity	MS/MS Count	Only identified by site	Reverse	Potential contaminant	id	Peptide IDs	Peptide is razor	Mod. peptide IDs	Evidence IDs	MS/MS IDs	Best MS/MS	Oxidation (M) site IDs	Oxidation (M) site positions
CON__P00761	CON__P00761	4	4	4	>P00761 SWISS-PROT:P00761|TRYP_PIG Trypsin - Sus scrofa (Pig).	1	4	4	4	25.1	25.1	25.1	24.409	231	231	0	62.178	782640000	70			+	0	431;525;579;875	True;True;True;True	448;542;597;901	749;750;751;914;915;916;917;1021;1022;1023;1572;1573	1423;1424;1425;1426;1427;1428;1429;1770;1771;1772;1773;1774;1775;1776;1777;1778;1779;1780;1781;1782;1783;1784;1785;1786;1787;1788;1789;1790;1791;1792;1985;1986;1987;1988;1989;1990;1991;1992;1993;1994;3100;3101;3102;3103;3104;3105;3106;3107;3108;3109;3110;3111;3112;3113;3114;3115;3116;3117;3118;3119;3120;3121;3122;3123;3124;3125;3126;3127;3128;3129	1423;1779;1987;3117
CON__P04264;CON__Q9R0H5;CON__Q6NXH9;CON__Q8BGZ7;CON__P50446;CON__Q6IFZ6;CON__Q7Z794;CON__Q922U2;CON__Q5XQN5	CON__P04264	5;1;1;1;1;1;1;1;1	5;1;1;1;1;1;1;1;1	3;0;0;1;1;0;0;1;1	>P04264 SWISS-PROT:P04264 Tax_Id=9606 Gene_Symbol=KRT1 Keratin, type II cytoskeletal 1	9	5	5	3	8.5	8.5	5.4	66.017	644	644;524;539;551;553;572;578;580;601	0	48.328	29929000	13			+	1	284;411;560;758;834	True;True;True;True;True	299;427;578;783;860	513;514;714;985;986;1348;1349;1511	1041;1042;1043;1044;1045;1360;1930;1931;2685;2686;2687;2688;3015	1042;1360;1931;2687;3015
CON__P13645;CON__P02535-1	CON__P13645;CON__P02535-1	3;2	3;2	3;2	>P13645 SWISS-PROT:P13645 Tax_Id=9606 Gene_Symbol=KRT10 Keratin, type I cytoskeletal 10;>P02535-1 SWISS-PROT:P02535-1 Tax_Id=10090 Gene_Symbol=Krt10 Isoform 1 of Keratin, type I cytoskeletal 10	2	3	3	3	5.6	5.6	5.6	59.51	593	593;570	0	16.902	5523100	6			+	2	74;518;775	True;True;True	79;535;801	140;141;900;1377	328;329;330;1744;1745;2763	330;1745;2763
CON__P35527	CON__P35527	1	1	1	>P35527 SWISS-PROT:P35527 Tax_Id=9606 Gene_Symbol=KRT9 Keratin, type I cytoskeletal 9	1	1	1	1	2.2	2.2	2.2	62.129	623	623	0	7.5792	936170	1			+	3	953	TRUE	982	1712	3380	3380
CON__Streptavidin	CON__Streptavidin	4	4	4	>Streptavidin (S.avidinii)	1	4	4	4	43.1	43.1	43.1	16.622	160	160	0	143.73	3958500000	446			+	4	445;647;782;1005	True;True;True;True	462;670;808;1035	775;776;777;778;779;780;781;782;783;784;785;1149;1150;1151;1152;1153;1154;1155;1156;1157;1158;1159;1160;1387;1388;1389;1390;1391;1392;1393;1394;1395;1396;1397;1398;1399;1400;1401;1402;1403;1404;1405;1406;1407;1408;1409;1410;1411;1412;1413;1414;1415;1416;1417;1418;1419;1420;1421;1422;1423;1424;1425;1426;1427;1428;1429;1796;1797;1798;1799;1800;1801;1802;1803;1804;1805;1806;1807;1808	1470;1471;1472;1473;1474;1475;1476;1477;1478;1479;1480;1481;1482;1483;1484;1485;1486;1487;1488;1489;1490;1491;1492;1493;1494;1495;1496;1497;1498;1499;1500;1501;1502;1503;1504;1505;1506;1507;1508;1509;1510;1511;1512;1513;1514;1515;1516;1517;1518;1519;1520;1521;1522;1523;1524;1525;1526;1527;1528;1529;1530;1531;1532;1533;1534;1535;1536;1537;1538;1539;1540;1541;1542;1543;1544;1545;1546;1547;1548;1549…	1471;2252;2798;3531
REV__tr|Q9HXW2|Q9HXW2_PSEAE	REV__tr|Q9HXW2|Q9HXW2_PSEAE	1	1	1	>tr|Q9HXW2|Q9HXW2_PSEAE Probable transcriptional regulator OS=Pseudomonas aeruginosa (strain ATCC 15692 / PAO1 / 1C / PRS 101 / LMG 12228) GN=PA3678 PE=4 SV=1	1	1	1	1	0	0	0	23.15	212	212	0.0079365	5.8291	240140000	17		+		5	486	TRUE	503	847;848	1648;1649;1650;1651;1652;1653;1654;1655;1656;1657;1658;1659;1660;1661;1662;1663;1664	1652
REV__tr|Q9I0T1|Q9I0T1_PSEAE	REV__tr|Q9I0T1|Q9I0T1_PSEAE	1	1	1	>tr|Q9I0T1|Q9I0T1_PSEAE Probable acyl-CoA thiolase OS=Pseudomonas aeruginosa (strain ATCC 15692 / PAO1 / 1C / PRS 101 / LMG 12228) GN=PA2553 PE=3 SV=1	1	1	1	1	0	0	0	41.4	396	396	0.0045662	6.4635	3861500	1		+		6	340	TRUE	355	596	1162	1162
sp|G3XD01|WBPD_PSEAE	sp|G3XD01|WBPD_PSEAE	1	1	1	>sp|G3XD01|WBPD_PSEAE UDP-2-acetamido-3-amino-2,3-dideoxy-D-glucuronate N-acetyltransferase OS=Pseudomonas aeruginosa (strain ATCC 15692 / PAO1 / 1C / PRS 101 / LMG 12228) GN=wbpD PE=1 SV=1	1	1	1	1	11	11	11	20.562	191	191	0.0043668	6.1984	929390	1				7	793	TRUE	819	1445	2884	2884
sp|G3XD12|HCNC_PSEAE	sp|G3XD12|HCNC_PSEAE	2	2	2	>sp|G3XD12|HCNC_PSEAE Hydrogen cyanide synthase subunit HcnC OS=Pseudomonas aeruginosa (strain ATCC 15692 / PAO1 / 1C / PRS 101 / LMG 12228) GN=hcnC PE=1 SV=1	1	2	2	2	5.8	5.8	5.8	45.281	417	417	0	12.363	1120600	2				8	815;1020	True;True	841;1050	1480;1835	2973;3711	2973;3711
sp|G3XD23|WBPB_PSEAE	sp|G3XD23|WBPB_PSEAE	4	4	4	>sp|G3XD23|WBPB_PSEAE UDP-N-acetyl-2-amino-2-deoxy-D-glucuronate oxidase OS=Pseudomonas aeruginosa (strain ATCC 15692 / PAO1 / 1C / PRS 101 / LMG 12228) GN=wbpB PE=1 SV=1	1	4	4	4	15.2	15.2	15.2	35.717	316	316	0	25.711	19467000	9				9	5;387;604;732	True;True;True;True	5;402;622;756	6;7;674;675;1063;1303;1304	8;9;10;11;1309;1310;2073;2609;2610	8;1309;2073;2609
sp|G3XD61|WBPI_PSEAE	sp|G3XD61|WBPI_PSEAE	1	1	1	>sp|G3XD61|WBPI_PSEAE UDP-2,3-diacetamido-2,3-dideoxy-D-glucuronate 2-epimerase OS=Pseudomonas aeruginosa (strain ATCC 15692 / PAO1 / 1C / PRS 101 / LMG 12228) GN=wbpI PE=1 SV=1	1	1	1	1	5.4	5.4	5.4	38.907	354	354	0	32.483	8351800	2				10	933	TRUE	960	1675;1676	3281;3282	3281
sp|G3XD94|UGND_PSEAE	sp|G3XD94|UGND_PSEAE	7	7	7	>sp|G3XD94|UGND_PSEAE UDP-N-acetyl-D-glucosamine 6-dehydrogenase OS=Pseudomonas aeruginosa (strain ATCC 15692 / PAO1 / 1C / PRS 101 / LMG 12228) GN=wbpA PE=1 SV=1	1	7	7	7	20.9	20.9	20.9	48.155	436	436	0	44.677	18394000	9				11	116;142;215;253;619;907;957	True;True;True;True;True;True;True	124;152;228;268;638;934;986	217;265;266;402;465;1088;1633;1718;1719	483;558;559;848;956;2113;3200;3400;3401	483;559;848;956;2113;3200;3400
sp|O50175|ASTB_PSEAE	sp|O50175|ASTB_PSEAE	1	1	1	>sp|O50175|ASTB_PSEAE N-succinylarginine dihydrolase OS=Pseudomonas aeruginosa (strain ATCC 15692 / PAO1 / 1C / PRS 101 / LMG 12228) GN=astB PE=3 SV=1	1	1	1	1	2.5	2.5	2.5	48.874	448	448	0.0041841	6.076	0	1				12	799	TRUE	825	1458	2930	2930
sp|O52759|RS4_PSEAE	sp|O52759|RS4_PSEAE	4	4	4	>sp|O52759|RS4_PSEAE 30S ribosomal protein S4 OS=Pseudomonas aeruginosa (strain ATCC 15692 / PAO1 / 1C / PRS 101 / LMG 12228) GN=rpsD PE=3 SV=2	1	4	4	4	24.8	24.8	24.8	23.277	206	206	0	34.442	48176000	17				13	67;514;576;734	True;True;True;True	72;531;594;758	129;130;893;894;1016;1017;1307;1308;1309	304;305;306;307;1734;1735;1736;1974;1975;1976;1977;2615;2616;2617;2618;2619;2620	306;1734;1975;2617
sp|O52760|RPOA_PSEAE	sp|O52760|RPOA_PSEAE	8	8	8	>sp|O52760|RPOA_PSEAE DNA-directed RNA polymerase subunit alpha OS=Pseudomonas aeruginosa (strain ATCC 15692 / PAO1 / 1C / PRS 101 / LMG 12228) GN=rpoA PE=3 SV=2	1	8	8	8	34.5	34.5	34.5	36.649	333	333	0	60.725	42241000	16				14	14;314;391;459;575;598;634;969	True;True;True;True;True;True;True;True	14;329;406;476;593;616;654;999	22;556;682;803;804;1014;1015;1055;1112;1113;1740	47;48;49;50;1106;1320;1578;1579;1580;1972;1973;2065;2149;2150;2151;3439	47;1106;1320;1580;1972;2065;2149;3439
sp|O52762|CATA_PSEAE	sp|O52762|CATA_PSEAE	7	7	7	>sp|O52762|CATA_PSEAE Catalase OS=Pseudomonas aeruginosa (strain ATCC 15692 / PAO1 / 1C / PRS 101 / LMG 12228) GN=katA PE=1 SV=1	1	7	7	7	23.2	23.2	23.2	55.588	482	482	0	77.776	48528000	16				15	187;520;534;589;641;675;844	True;True;True;True;True;True;True	199;537;551;607;664;698;870	351;352;903;904;932;1038;1039;1138;1139;1205;1524;1525;1526	741;742;1750;1751;1752;1823;2018;2019;2020;2021;2210;2211;2432;3028;3029;3030;3031	742;1750;1823;2018;2211;2432;3028
sp|O54439|ACP1_PSEAE	sp|O54439|ACP1_PSEAE	2	2	2	>sp|O54439|ACP1_PSEAE Acyl carrier protein 1 OS=Pseudomonas aeruginosa (strain ATCC 15692 / PAO1 / 1C / PRS 101 / LMG 12228) GN=acpP1 PE=3 SV=4	1	2	2	2	32.1	32.1	32.1	8.7406	78	78	0	24.095	34616000	20				16	460;464	True;True	477;481	805;806;807;808;813;814	1581;1582;1583;1584;1585;1586;1587;1588;1589;1590;1591;1592;1593;1594;1595;1601;1602;1603;1604;1605	1585;1601
sp|O68822|AMPA_PSEAE	sp|O68822|AMPA_PSEAE	7	7	7	>sp|O68822|AMPA_PSEAE Cytosol aminopeptidase OS=Pseudomonas aeruginosa (strain ATCC 15692 / PAO1 / 1C / PRS 101 / LMG 12228) GN=pepA PE=3 SV=1	1	7	7	7	19.8	19.8	19.8	52.331	495	495	0	59.592	50520000	15				17	135;212;239;348;506;544;906	True;True;True;True;True;True;True	145;225;252;363;523;561;933	253;254;396;397;439;612;613;881;954;1631;1632	543;544;545;839;840;841;906;1200;1201;1202;1203;1204;1716;1886;3198;3199	543;840;906;1203;1716;1886;3199
sp|O69753|PHZB1_PSEAE	sp|O69753|PHZB1_PSEAE	2	1	1	>sp|O69753|PHZB1_PSEAE Phenazine biosynthesis protein PhzB 1 OS=Pseudomonas aeruginosa (strain ATCC 15692 / PAO1 / 1C / PRS 101 / LMG 12228) GN=phzB1 PE=3 SV=1	1	2	1	1	16	9.9	9.9	18.888	162	162	0	6.9721	2250300	1				18	89;686	False;True	94;710	164;165;1228	364;365;366;367;368;369;2492	365;2492
sp|O69754|PHZF_PSEAE	sp|O69754|PHZF_PSEAE	2	2	2	>sp|O69754|PHZF_PSEAE Trans-2,3-dihydro-3-hydroxyanthranilate isomerase OS=Pseudomonas aeruginosa (strain ATCC 15692 / PAO1 / 1C / PRS 101 / LMG 12228) GN=phzF1 PE=3 SV=2	1	2	2	2	13.7	13.7	13.7	30.342	278	278	0	12.711	2940000	3				19	615;685	True;True	633;709	1081;1227	2097;2098;2491	2097;2491
sp|O82850|RS2_PSEAE	sp|O82850|RS2_PSEAE	3	3	3	>sp|O82850|RS2_PSEAE 30S ribosomal protein S2 OS=Pseudomonas aeruginosa (strain ATCC 15692 / PAO1 / 1C / PRS 101 / LMG 12228) GN=rpsB PE=3 SV=2	1	3	3	3	15	15	15	27.336	246	246	0	27.541	22371000	11				20	176;830;995	True;True;True	187;856;1025	325;326;1505;1506;1780;1781	667;668;3003;3004;3005;3006;3007;3008;3009;3501;3502	667;3004;3501
sp|O82851|EFTS_PSEAE	sp|O82851|EFTS_PSEAE	4	4	4	>sp|O82851|EFTS_PSEAE Elongation factor Ts OS=Pseudomonas aeruginosa (strain ATCC 15692 / PAO1 / 1C / PRS 101 / LMG 12228) GN=tsf PE=3 SV=1	1	4	4	4	15.6	15.6	15.6	30.653	289	289	0	26.816	9070900	5				21	31;281;584;690	True;True;True;True	33;296;602;714	62;510;1029;1233	163;1037;1038;2007;2008;2497	163;1037;2007;2497
sp|O86428|ILVE_PSEAE	sp|O86428|ILVE_PSEAE	2	2	2	>sp|O86428|ILVE_PSEAE Branched-chain-amino-acid aminotransferase OS=Pseudomonas aeruginosa (strain ATCC 15692 / PAO1 / 1C / PRS 101 / LMG 12228) GN=ilvE PE=1 SV=2	1	2	2	2	6.8	6.8	6.8	34.084	307	307	0	13.322	13712000	6				22	149;151	True;True	159;161	277;278;281;282	573;574;575;576;581;582	573;581
sp|P04739|FMPO_PSEAE	sp|P04739|FMPO_PSEAE	4	4	4	>sp|P04739|FMPO_PSEAE Fimbrial protein OS=Pseudomonas aeruginosa (strain ATCC 15692 / PAO1 / 1C / PRS 101 / LMG 12228) GN=pilA PE=1 SV=1	1	4	4	4	36.2	36.2	36.2	15.512	149	149	0	32.354	26424000	9				23	425;738;783;857	True;True;True;True	442;763;809;883	738;739;740;1316;1317;1430;1546;1547	1410;1411;1412;1413;2634;2635;2853;3061;3062	1410;2634;2853;3061
sp|P05384|DBHB_PSEAE	sp|P05384|DBHB_PSEAE	2	2	2	>sp|P05384|DBHB_PSEAE DNA-binding protein HU-beta OS=Pseudomonas aeruginosa (strain ATCC 15692 / PAO1 / 1C / PRS 101 / LMG 12228) GN=hupB PE=1 SV=3	1	2	2	2	32.2	32.2	32.2	9.0865	90	90	0	23.716	52385000	11				24	73;740	True;True	78;765	138;139;1320;1321	324;325;326;327;2639;2640;2641;2642;2643;2644;2645	325;2641
sp|P08280|RECA_PSEAE	sp|P08280|RECA_PSEAE	1	1	1	>sp|P08280|RECA_PSEAE Protein RecA OS=Pseudomonas aeruginosa (strain ATCC 15692 / PAO1 / 1C / PRS 101 / LMG 12228) GN=recA PE=3 SV=1	1	1	1	1	5.2	5.2	5.2	36.879	346	346	0	6.528	779440	1				25	766	TRUE	791	1363	2714	2714
sp|P08308|OTCC_PSEAE	sp|P08308|OTCC_PSEAE	10	10	10	>sp|P08308|OTCC_PSEAE Ornithine carbamoyltransferase, catabolic OS=Pseudomonas aeruginosa (strain ATCC 15692 / PAO1 / 1C / PRS 101 / LMG 12228) GN=arcB PE=1 SV=3	1	10	10	10	39.3	39.3	39.3	38.108	336	336	0	68.475	137480000	34				26	65;240;266;586;587;640;664;672;707;1015	True;True;True;True;True;True;True;True;True;True	70;253;254;281;604;605;663;687;695;731;1045	126;440;441;442;443;486;1032;1033;1034;1035;1136;1137;1185;1186;1201;1202;1258;1259;1824;1825	301;907;908;909;910;911;912;1005;2011;2012;2013;2014;2015;2206;2207;2208;2209;2395;2396;2397;2424;2425;2426;2427;2428;2429;2536;2537;2538;2539;2540;3694;3695;3696;3697	301;910;1005;2012;2015;2209;2395;2425;2536;3695	0;1	258;261
sp|P09591|EFTU_PSEAE	sp|P09591|EFTU_PSEAE	13	13	13	>sp|P09591|EFTU_PSEAE Elongation factor Tu OS=Pseudomonas aeruginosa (strain ATCC 15692 / PAO1 / 1C / PRS 101 / LMG 12228) GN=tufA PE=1 SV=2	1	13	13	13	46.9	46.9	46.9	43.369	397	397	0	170.77	920000000	234				27	26;43;48;62;161;180;346;390;593;638;719;851;956	True;True;True;True;True;True;True;True;True;True;True;True;True	26;27;28;46;51;66;67;171;191;192;361;405;611;659;660;661;743;877;985	42;43;44;45;46;47;48;49;50;51;52;53;54;84;85;93;94;117;118;119;120;121;122;296;297;334;335;336;337;338;606;607;608;609;680;681;1043;1044;1045;1046;1047;1048;1123;1124;1125;1126;1127;1128;1129;1130;1131;1132;1279;1280;1536;1537;1715;1716;1717	95;96;97;98;99;100;101;102;103;104;105;106;107;108;109;110;111;112;113;114;115;116;117;118;119;120;121;122;123;124;125;126;127;128;129;130;131;132;133;134;135;136;137;138;139;140;141;142;143;144;145;146;147;148;149;194;195;206;207;208;209;210;211;212;213;214;215;216;217;218;219;220;221;222;223;224;273;274;275;276;277;278;279;280;281;282;283;284;285;286;287;288;289;290;291;292;293;294;295;296;611;…	95;194;207;273;611;695;1191;1318;2027;2177;2573;3049;3385	2;3;4;5;6;7	140;152;177;216;362;372
sp|P11221|OPRI_PSEAE	sp|P11221|OPRI_PSEAE	2	2	2	>sp|P11221|OPRI_PSEAE Major outer membrane lipoprotein OS=Pseudomonas aeruginosa (strain ATCC 15692 / PAO1 / 1C / PRS 101 / LMG 12228) GN=oprI PE=3 SV=1	1	2	2	2	25.3	25.3	25.3	8.8348	83	83	0	15.588	9546300	11				28	476;583	True;True	493;601	831;1027;1028	1629;1630;1998;1999;2000;2001;2002;2003;2004;2005;2006	1630;2000
sp|P13794|PORF_PSEAE	sp|P13794|PORF_PSEAE	6	6	6	>sp|P13794|PORF_PSEAE Outer membrane porin F OS=Pseudomonas aeruginosa (strain ATCC 15692 / PAO1 / 1C / PRS 101 / LMG 12228) GN=oprF PE=1 SV=1	1	6	6	6	26.6	26.6	26.6	37.639	350	350	0	57.699	66129000	22				29	118;198;715;722;726;937	True;True;True;True;True;True	126;211;739;746;750;964	219;220;372;373;1274;1284;1285;1293;1682;1683	485;486;487;783;784;785;786;787;788;789;790;791;2567;2584;2585;2597;2598;3288;3289;3290;3291;3292	487;788;2567;2584;2598;3292
sp|P13981|ARCA_PSEAE	sp|P13981|ARCA_PSEAE	17	17	17	>sp|P13981|ARCA_PSEAE Arginine deiminase OS=Pseudomonas aeruginosa (strain ATCC 15692 / PAO1 / 1C / PRS 101 / LMG 12228) GN=arcA PE=1 SV=2	1	17	17	17	46.4	46.4	46.4	46.435	418	418	0	214.37	658260000	142				30	56;168;186;261;343;456;478;479;493;682;692;702;725;792;811;919;977	True;True;True;True;True;True;True;True;True;True;True;True;True;True;True;True;True	59;179;198;276;358;473;495;496;510;706;716;726;749;818;837;946;1007	104;309;310;349;350;477;478;600;601;602;798;799;834;835;836;837;858;859;860;861;1222;1223;1235;1236;1249;1250;1289;1290;1291;1292;1443;1444;1475;1476;1652;1751;1752;1753	235;236;638;639;640;641;642;643;644;645;729;730;731;732;733;734;735;736;737;738;739;740;979;980;981;982;983;984;985;986;987;988;1171;1172;1173;1174;1175;1176;1177;1178;1179;1180;1181;1182;1566;1567;1568;1569;1570;1571;1572;1573;1574;1633;1634;1635;1636;1637;1638;1674;1675;1676;1677;1678;1679;1680;1681;1682;1683;1684;1685;1686;1687;2477;2478;2479;2480;2481;2482;2483;2484;2485;2486;2487;2499;2500;2…	235;643;737;979;1171;1568;1633;1637;1674;2484;2500;2521;2591;2881;2956;3233;3454
sp|P13982|ARCC_PSEAE	sp|P13982|ARCC_PSEAE	5	5	5	>sp|P13982|ARCC_PSEAE Carbamate kinase OS=Pseudomonas aeruginosa (strain ATCC 15692 / PAO1 / 1C / PRS 101 / LMG 12228) GN=arcC PE=3 SV=1	1	5	5	5	26.1	26.1	26.1	33.08	310	310	0	41.151	28636000	25				31	59;157;472;527;871	True;True;True;True;True	62;167;489;544;897	108;109;290;291;292;825;920;921;1567;1568	244;245;246;591;592;593;594;595;596;597;598;599;600;601;602;603;604;605;606;607;1620;1795;1796;3093;3094;3095	244;599;1620;1795;3093
sp|P14165|CISY_PSEAE	sp|P14165|CISY_PSEAE	4	4	4	>sp|P14165|CISY_PSEAE Citrate synthase OS=Pseudomonas aeruginosa (strain ATCC 15692 / PAO1 / 1C / PRS 101 / LMG 12228) GN=gltA PE=3 SV=2	1	4	4	4	9.6	9.6	9.6	47.694	428	428	0	26.158	14311000	8				32	323;389;621;631	True;True;True;True	338;404;640;651	568;678;679;1091;1108;1109	1120;1314;1315;1316;2116;2117;2145;2146	1120;1315;2116;2146
sp|P15276|ALGP_PSEAE	sp|P15276|ALGP_PSEAE	1	1	1	>sp|P15276|ALGP_PSEAE Transcriptional regulatory protein AlgP OS=Pseudomonas aeruginosa (strain ATCC 15692 / PAO1 / 1C / PRS 101 / LMG 12228) GN=algP PE=4 SV=2	1	1	1	1	4	4	4	34.49	352	352	0	12.466	21975000	10				33	254	TRUE	269	466;467	957;958;959;960;961;962;963;964;965;966	958
sp|P26276|ALGC_PSEAE	sp|P26276|ALGC_PSEAE	1	1	1	>sp|P26276|ALGC_PSEAE Phosphomannomutase/phosphoglucomutase OS=Pseudomonas aeruginosa (strain ATCC 15692 / PAO1 / 1C / PRS 101 / LMG 12228) GN=algC PE=1 SV=4	1	1	1	1	3.2	3.2	3.2	50.295	463	463	0	9.7653	1615700	1				34	909	TRUE	936	1636	3215	3215
sp|P26480|RPOD_PSEAE	sp|P26480|RPOD_PSEAE	1	1	1	>sp|P26480|RPOD_PSEAE RNA polymerase sigma factor RpoD OS=Pseudomonas aeruginosa (strain ATCC 15692 / PAO1 / 1C / PRS 101 / LMG 12228) GN=rpoD PE=3 SV=1	1	1	1	1	2.8	2.8	2.8	69.643	617	617	0.0044444	6.3597	419360	1				35	696	TRUE	720	1242	2513	2513
sp|P28810|MMSA_PSEAE	sp|P28810|MMSA_PSEAE	1	1	1	>sp|P28810|MMSA_PSEAE Methylmalonate-semialdehyde dehydrogenase [acylating] OS=Pseudomonas aeruginosa (strain ATCC 15692 / PAO1 / 1C / PRS 101 / LMG 12228) GN=mmsA PE=1 SV=2	1	1	1	1	3.4	3.4	3.4	53.663	497	497	0	8.4406	4693100	3				36	538	TRUE	555	945;946	1875;1876;1877	1877
sp|P30718|CH60_PSEAE	sp|P30718|CH60_PSEAE	20	20	20	>sp|P30718|CH60_PSEAE 60 kDa chaperonin OS=Pseudomonas aeruginosa (strain ATCC 15692 / PAO1 / 1C / PRS 101 / LMG 12228) GN=groL PE=1 SV=3	1	20	20	20	52.1	52.1	52.1	57.085	547	547	0	215.41	601090000	170				37	15;60;87;94;131;133;174;227;244;247;274;313;494;627;706;708;709;744;881;892	True;True;True;True;True;True;True;True;True;True;True;True;True;True;True;True;True;True;True;True	15;63;64;92;101;139;141;142;143;185;240;258;259;262;289;328;511;646;647;730;732;733;769;907;918;919	23;24;110;111;112;113;114;115;160;161;175;176;177;178;244;245;247;248;249;250;251;320;321;322;323;418;450;451;452;453;457;458;498;555;862;863;1100;1101;1102;1103;1254;1255;1256;1257;1260;1261;1262;1263;1326;1327;1594;1609;1610;1611	51;52;53;54;55;56;57;58;59;247;248;249;250;251;252;253;254;255;256;257;258;259;260;261;262;263;264;265;266;267;268;269;270;271;354;355;356;357;358;359;385;386;387;388;389;390;391;392;393;394;395;396;397;398;399;400;401;402;403;404;405;406;407;408;409;410;411;412;413;414;415;416;417;418;419;420;421;422;522;523;524;525;526;528;529;530;531;532;533;534;535;536;537;538;539;540;541;659;660;661;662;663;…	56;256;355;386;526;535;659;870;937;948;1020;1104;1689;2133;2535;2542;2543;2659;3150;3173	8;9;10;11;12;13	16;111;114;166;233;389
sp|P32722|PORD_PSEAE	sp|P32722|PORD_PSEAE	2	2	2	>sp|P32722|PORD_PSEAE Porin D OS=Pseudomonas aeruginosa (strain ATCC 15692 / PAO1 / 1C / PRS 101 / LMG 12228) GN=oprD PE=1 SV=1	1	2	2	2	5.4	5.4	5.4	48.36	443	443	0	10.721	620720	2				38	93;543	True;True	100;560	174;953	384;1885	384;1885
sp|P37798|ACCC_PSEAE	sp|P37798|ACCC_PSEAE	6	6	6	>sp|P37798|ACCC_PSEAE Biotin carboxylase OS=Pseudomonas aeruginosa (strain ATCC 15692 / PAO1 / 1C / PRS 101 / LMG 12228) GN=accC PE=1 SV=1	1	6	6	6	20	20	20	48.887	449	449	0	48.208	41425000	13				39	57;649;746;805;913;985	True;True;True;True;True;True	60;672;771;831;940;1015	105;1162;1163;1330;1331;1465;1641;1642;1763;1764	237;2364;2365;2366;2367;2663;2664;2939;3220;3221;3222;3472;3473	237;2366;2663;2939;3222;3472
sp|P37799|BCCP_PSEAE	sp|P37799|BCCP_PSEAE	4	4	4	>sp|P37799|BCCP_PSEAE Biotin carboxyl carrier protein of acetyl-CoA carboxylase OS=Pseudomonas aeruginosa (strain ATCC 15692 / PAO1 / 1C / PRS 101 / LMG 12228) GN=accB PE=3 SV=1	1	4	4	4	52.6	52.6	52.6	16.455	156	156	0	89.832	889470000	137				40	13;536;771;794	True;True;True;True	13;553;796;797;820	19;20;21;934;935;936;937;938;939;940;941;942;943;1369;1370;1371;1372;1446;1447;1448;1449;1450;1451;1452	30;31;32;33;34;35;36;37;38;39;40;41;42;43;44;45;46;1825;1826;1827;1828;1829;1830;1831;1832;1833;1834;1835;1836;1837;1838;1839;1840;1841;1842;1843;1844;1845;1846;1847;1848;1849;1850;1851;1852;1853;1854;1855;1856;1857;1858;1859;1860;1861;1862;1863;1864;1865;1866;1867;1868;1869;1870;1871;1872;2720;2721;2722;2723;2724;2725;2726;2727;2728;2729;2730;2731;2732;2733;2734;2735;2736;2737;2738;2739;2740;274…	33;1858;2739;2887	14	87
sp|P38100|CARB_PSEAE	sp|P38100|CARB_PSEAE	7	7	7	>sp|P38100|CARB_PSEAE Carbamoyl-phosphate synthase large chain OS=Pseudomonas aeruginosa (strain ATCC 15692 / PAO1 / 1C / PRS 101 / LMG 12228) GN=carB PE=3 SV=3	1	7	7	7	9.5	9.5	9.5	117.33	1073	1073	0	48.36	12905000	9				41	350;352;442;509;779;826;837	True;True;True;True;True;True;True	365;367;459;526;805;852;863	615;618;619;770;886;1382;1499;1515	1206;1209;1210;1459;1723;1724;2768;2996;3019	1206;1210;1459;1724;2768;2996;3019
sp|P43336|PHHC_PSEAE	sp|P43336|PHHC_PSEAE	3	3	3	>sp|P43336|PHHC_PSEAE Aromatic-amino-acid aminotransferase OS=Pseudomonas aeruginosa (strain ATCC 15692 / PAO1 / 1C / PRS 101 / LMG 12228) GN=phhC PE=3 SV=2	1	3	3	3	11.3	11.3	11.3	43.273	399	399	0	18.723	6750500	6				42	18;491;946	True;True;True	18;508;975	29;855;1701;1702	68;1671;3364;3365;3366;3367	68;1671;3364
sp|P47203|FTSA_PSEAE	sp|P47203|FTSA_PSEAE	1	1	1	>sp|P47203|FTSA_PSEAE Cell division protein FtsA OS=Pseudomonas aeruginosa (strain ATCC 15692 / PAO1 / 1C / PRS 101 / LMG 12228) GN=ftsA PE=3 SV=2	1	1	1	1	2.4	2.4	2.4	44.646	417	417	0	6.7761	1021500	1				43	840	TRUE	866	1519	3023	3023
sp|P47204|FTSZ_PSEAE	sp|P47204|FTSZ_PSEAE	2	2	2	>sp|P47204|FTSZ_PSEAE Cell division protein FtsZ OS=Pseudomonas aeruginosa (strain ATCC 15692 / PAO1 / 1C / PRS 101 / LMG 12228) GN=ftsZ PE=1 SV=2	1	2	2	2	7.9	7.9	7.9	41.218	394	394	0	15.754	3058500	4				44	353;975	True;True	368;1005	620;621;1748;1749	1211;1212;3450;3451	1212;3450
sp|P48247|GSA_PSEAE	sp|P48247|GSA_PSEAE	2	2	2	>sp|P48247|GSA_PSEAE Glutamate-1-semialdehyde 2,1-aminomutase OS=Pseudomonas aeruginosa (strain ATCC 15692 / PAO1 / 1C / PRS 101 / LMG 12228) GN=hemL PE=1 SV=2	1	2	2	2	10.1	10.1	10.1	45.397	427	427	0	14.342	4507700	3				45	53;868	True;True	56;894	101;1563	232;3085;3086	232;3086
sp|P53593|SUCC_PSEAE	sp|P53593|SUCC_PSEAE	11	11	11	>sp|P53593|SUCC_PSEAE Succinyl-CoA ligase [ADP-forming] subunit beta OS=Pseudomonas aeruginosa (strain ATCC 15692 / PAO1 / 1C / PRS 101 / LMG 12228) GN=sucC PE=3 SV=2	1	11	11	11	36.9	36.9	36.9	41.542	388	388	0	142.33	244570000	75				46	41;127;140;234;419;428;443;521;669;712;922	True;True;True;True;True;True;True;True;True;True;True	44;135;150;247;436;445;460;538;692;736;949	80;81;232;262;431;432;728;729;730;731;744;745;771;772;905;1194;1195;1196;1197;1268;1269;1656;1657;1658;1659	186;187;188;189;190;501;502;503;504;555;891;892;893;894;895;896;1398;1399;1400;1401;1417;1418;1460;1461;1462;1463;1464;1465;1466;1753;2409;2410;2411;2412;2413;2414;2415;2416;2417;2418;2552;2553;2554;2555;2556;2557;2558;2559;2560;3239;3240;3241;3242;3243;3244;3245;3246;3247;3248;3249;3250;3251;3252;3253;3254;3255;3256;3257;3258;3259;3260;3261;3262;3263;3264	186;502;555;892;1400;1418;1461;1753;2409;2554;3246
sp|P53641|SODF_PSEAE	sp|P53641|SODF_PSEAE	3	3	3	>sp|P53641|SODF_PSEAE Superoxide dismutase [Fe] OS=Pseudomonas aeruginosa (strain ATCC 15692 / PAO1 / 1C / PRS 101 / LMG 12228) GN=sodB PE=3 SV=3	1	3	3	3	17.1	17.1	17.1	21.351	193	193	0	19.288	41714000	9				47	44;759;849	True;True;True	47;784;875	86;87;1350;1532;1533	196;197;198;199;2689;3037;3038;3039;3040	196;2689;3037
sp|P57112|STHA_PSEAE	sp|P57112|STHA_PSEAE	3	3	3	>sp|P57112|STHA_PSEAE Soluble pyridine nucleotide transhydrogenase OS=Pseudomonas aeruginosa (strain ATCC 15692 / PAO1 / 1C / PRS 101 / LMG 12228) GN=sthA PE=1 SV=2	1	3	3	3	7.3	7.3	7.3	51.16	464	464	0	18.197	9625700	5				48	107;531;727	True;True;True	114;548;751	200;201;928;929;1294	460;461;1818;1819;2599	461;1818;2599
sp|P57668|TPX_PSEAE	sp|P57668|TPX_PSEAE	2	2	2	>sp|P57668|TPX_PSEAE Probable thiol peroxidase OS=Pseudomonas aeruginosa (strain ATCC 15692 / PAO1 / 1C / PRS 101 / LMG 12228) GN=tpx PE=3 SV=1	1	2	2	2	26.1	26.1	26.1	17.234	165	165	0	11.146	931410	2				49	306;723	True;True	321;747	545;1286	1082;2586	1082;2586
sp|P72173|AAT_PSEAE	sp|P72173|AAT_PSEAE	9	9	9	>sp|P72173|AAT_PSEAE Aspartate aminotransferase OS=Pseudomonas aeruginosa (strain ATCC 15692 / PAO1 / 1C / PRS 101 / LMG 12228) GN=aspC PE=3 SV=2	1	9	9	9	32.9	32.9	32.9	43.319	398	398	0	64.425	32650000	11				50	50;77;388;501;549;836;894;984;1021	True;True;True;True;True;True;True;True;True	53;82;403;518;566;862;921;1014;1051	97;98;145;676;677;874;963;964;1514;1613;1614;1761;1762;1836	228;229;335;1311;1312;1313;1706;1900;1901;3018;3175;3176;3470;3471;3712	229;335;1312;1706;1900;3018;3176;3470;3712
sp|Q51342|PUR1_PSEAE	sp|Q51342|PUR1_PSEAE	1	1	1	>sp|Q51342|PUR1_PSEAE Amidophosphoribosyltransferase OS=Pseudomonas aeruginosa (strain ATCC 15692 / PAO1 / 1C / PRS 101 / LMG 12228) GN=purF PE=3 SV=3	1	1	1	1	3	3	3	55.369	501	501	0	7.0319	1419400	1				51	175	TRUE	186	324	666	666
sp|Q51422|SYDND_PSEAE	sp|Q51422|SYDND_PSEAE	3	3	3	>sp|Q51422|SYDND_PSEAE Aspartate--tRNA(Asp/Asn) ligase OS=Pseudomonas aeruginosa (strain ATCC 15692 / PAO1 / 1C / PRS 101 / LMG 12228) GN=aspS PE=1 SV=2	1	3	3	3	7.1	7.1	7.1	66.207	591	591	0	18.988	3498900	3				52	845;896;945	True;True;True	871;923;974	1527;1616;1700	3032;3178;3363	3032;3178;3363
sp|Q51561|RPOB_PSEAE	sp|Q51561|RPOB_PSEAE	23	23	23	>sp|Q51561|RPOB_PSEAE DNA-directed RNA polymerase subunit beta OS=Pseudomonas aeruginosa (strain ATCC 15692 / PAO1 / 1C / PRS 101 / LMG 12228) GN=rpoB PE=3 SV=2	1	23	23	23	25.4	25.4	25.4	150.84	1357	1357	0	200.77	143570000	59				53	58;100;206;218;221;312;325;337;338;382;384;404;469;488;578;607;611;720;781;807;865;962;1003	True;True;True;True;True;True;True;True;True;True;True;True;True;True;True;True;True;True;True;True;True;True;True	61;107;219;231;234;327;340;352;353;397;399;419;486;505;596;625;629;744;807;833;891;992;1033	106;107;185;186;384;385;407;408;411;554;570;571;591;592;593;668;671;702;703;820;821;850;851;1019;1020;1067;1068;1074;1075;1281;1282;1385;1386;1467;1468;1559;1730;1731;1793;1794	238;239;240;241;242;243;432;433;434;435;436;819;820;821;853;854;855;858;1101;1102;1122;1123;1124;1156;1157;1158;1159;1299;1305;1306;1345;1346;1613;1614;1666;1667;1983;1984;2079;2080;2090;2091;2580;2581;2582;2772;2773;2774;2942;2943;2944;2945;3079;3080;3427;3428;3429;3520;3521	239;434;819;855;858;1102;1123;1157;1158;1299;1306;1345;1613;1666;1983;2079;2090;2582;2772;2944;3079;3427;3521
sp|Q51567|SUCD_PSEAE	sp|Q51567|SUCD_PSEAE	8	8	8	>sp|Q51567|SUCD_PSEAE Succinyl-CoA ligase [ADP-forming] subunit alpha OS=Pseudomonas aeruginosa (strain ATCC 15692 / PAO1 / 1C / PRS 101 / LMG 12228) GN=sucD PE=3 SV=2	1	8	8	8	41	41	41	30.266	295	295	0	54.886	92286000	32				54	71;96;196;264;335;522;617;749	True;True;True;True;True;True;True;True	76;103;209;279;350;539;636;774	135;136;180;369;370;483;484;587;588;906;907;1086;1335;1336	317;318;319;320;321;322;424;773;774;775;776;777;778;779;780;781;997;998;999;1000;1001;1002;1003;1150;1151;1152;1153;1754;1755;2111;2668;2669;2670	321;424;774;1000;1151;1755;2111;2670
sp|Q59636|NDK_PSEAE	sp|Q59636|NDK_PSEAE	3	3	3	>sp|Q59636|NDK_PSEAE Nucleoside diphosphate kinase OS=Pseudomonas aeruginosa (strain ATCC 15692 / PAO1 / 1C / PRS 101 / LMG 12228) GN=ndk PE=3 SV=2	1	3	3	3	31.5	31.5	31.5	15.592	143	143	0	18.789	14519000	11				55	185;683;831	True;True;True	197;707;857	345;346;347;348;1224;1225;1507	719;720;721;722;723;724;725;726;727;728;2488;2489;3010	719;2488;3010
sp|Q59637|ODP1_PSEAE	sp|Q59637|ODP1_PSEAE	19	19	19	>sp|Q59637|ODP1_PSEAE Pyruvate dehydrogenase E1 component OS=Pseudomonas aeruginosa (strain ATCC 15692 / PAO1 / 1C / PRS 101 / LMG 12228) GN=aceE PE=3 SV=2	1	19	19	19	23	23	23	99.563	882	882	0	123.32	120640000	39				56	8;173;182;197;232;300;363;418;430;453;471;609;630;655;681;750;765;810;928	True;True;True;True;True;True;True;True;True;True;True;True;True;True;True;True;True;True;True	8;184;194;210;245;315;378;435;447;470;488;627;650;678;705;775;790;836;955	11;12;318;319;341;371;427;428;538;638;726;727;747;748;794;795;824;1070;1071;1106;1107;1171;1221;1337;1361;1362;1474;1667;1668	16;17;18;657;658;714;715;782;883;884;885;1074;1075;1239;1240;1394;1395;1396;1397;1420;1421;1422;1559;1560;1561;1562;1618;1619;2084;2085;2143;2144;2376;2476;2671;2712;2713;2954;3273;3274	16;657;715;782;884;1075;1239;1397;1420;1559;1618;2085;2144;2376;2476;2671;2712;2954;3273
sp|Q59638|ODP2_PSEAE	sp|Q59638|ODP2_PSEAE	11	11	11	>sp|Q59638|ODP2_PSEAE Dihydrolipoyllysine-residue acetyltransferase component of pyruvate dehydrogenase complex OS=Pseudomonas aeruginosa (strain ATCC 15692 / PAO1 / 1C / PRS 101 / LMG 12228) GN=aceF PE=2 SV=2	1	11	11	11	33.1	33.1	33.1	56.708	547	547	0	84.947	71750000	33				57	27;28;29;241;276;526;546;590;747;763;897	True;True;True;True;True;True;True;True;True;True;True	29;30;31;255;291;543;563;608;772;788;924	55;56;57;58;59;444;445;500;501;918;919;957;958;1040;1332;1333;1358;1359;1617;1618	150;151;152;153;154;155;913;914;915;1022;1023;1793;1794;1889;1890;1891;1892;2022;2665;2666;2701;2702;2703;2704;2705;2706;2707;2708;2709;2710;3179;3180;3181	150;153;154;913;1023;1793;1889;2022;2665;2702;3179
sp|Q9HT16|ATPF_PSEAE	sp|Q9HT16|ATPF_PSEAE	3	3	3	>sp|Q9HT16|ATPF_PSEAE ATP synthase subunit b OS=Pseudomonas aeruginosa (strain ATCC 15692 / PAO1 / 1C / PRS 101 / LMG 12228) GN=atpF PE=3 SV=1	1	3	3	3	24.4	24.4	24.4	16.956	156	156	0	25.708	10956000	6				58	106;110;395	True;True;True	113;117;410	198;199;206;207;688;689	458;459;468;469;1326;1327;1328	459;468;1326
sp|Q9HT18|ATPA_PSEAE	sp|Q9HT18|ATPA_PSEAE	12	12	12	>sp|Q9HT18|ATPA_PSEAE ATP synthase subunit alpha OS=Pseudomonas aeruginosa (strain ATCC 15692 / PAO1 / 1C / PRS 101 / LMG 12228) GN=atpA PE=3 SV=1	1	12	12	12	26.1	26.1	26.1	55.393	514	514	0	106.46	130810000	36				59	233;311;328;436;484;633;656;785;786;798;872;974	True;True;True;True;True;True;True;True;True;True;True;True	246;326;343;453;501;653;679;811;812;824;898;1004	429;430;552;553;576;577;759;760;844;845;1111;1172;1173;1433;1434;1435;1456;1457;1569;1747	886;887;888;889;890;1097;1098;1099;1100;1131;1132;1133;1134;1440;1441;1645;1646;2148;2377;2378;2379;2380;2856;2857;2858;2859;2860;2861;2862;2926;2927;2928;2929;3096;3448;3449	886;1097;1131;1440;1646;2148;2377;2856;2860;2926;3096;3449	15	1
sp|Q9HT19|ATPG_PSEAE	sp|Q9HT19|ATPG_PSEAE	2	2	2	>sp|Q9HT19|ATPG_PSEAE ATP synthase gamma chain OS=Pseudomonas aeruginosa (strain ATCC 15692 / PAO1 / 1C / PRS 101 / LMG 12228) GN=atpG PE=3 SV=1	1	2	2	2	9.8	9.8	9.8	31.553	286	286	0	15.217	4602100	3				60	652;762	True;True	675;787	1168;1357	2372;2373;2700	2372;2700
sp|Q9HT20|ATPB_PSEAE	sp|Q9HT20|ATPB_PSEAE	13	13	13	>sp|Q9HT20|ATPB_PSEAE ATP synthase subunit beta OS=Pseudomonas aeruginosa (strain ATCC 15692 / PAO1 / 1C / PRS 101 / LMG 12228) GN=atpD PE=3 SV=1	1	13	13	13	41.7	41.7	41.7	49.499	458	458	0	125.32	97005000	29				61	158;169;171;211;291;379;441;710;753;869;870;903;1019	True;True;True;True;True;True;True;True;True;True;True;True;True	168;180;182;224;306;394;458;734;778;895;896;930;1049	293;311;312;314;315;394;395;523;524;664;768;769;1264;1265;1341;1564;1565;1566;1627;1833;1834	608;646;647;648;649;650;651;653;654;836;837;838;1058;1059;1290;1291;1457;1458;2546;2547;2675;3087;3088;3089;3090;3091;3092;3192;3193;3709;3710	608;646;654;836;1058;1290;1457;2547;2675;3088;3091;3192;3710
sp|Q9HT21|ATPE_PSEAE	sp|Q9HT21|ATPE_PSEAE	3	3	3	>sp|Q9HT21|ATPE_PSEAE ATP synthase epsilon chain OS=Pseudomonas aeruginosa (strain ATCC 15692 / PAO1 / 1C / PRS 101 / LMG 12228) GN=atpC PE=3 SV=1	1	3	3	3	24.8	24.8	24.8	14.726	141	141	0	22.031	7571200	5				62	47;302;489	True;True;True	50;317;506	91;92;540;852;853	204;205;1077;1668;1669	205;1077;1668
sp|Q9HT95|ATSE4_PSEAE	sp|Q9HT95|ATSE4_PSEAE	2	2	2	>sp|Q9HT95|ATSE4_PSEAE Acetyltransferase PA5475 OS=Pseudomonas aeruginosa (strain ATCC 15692 / PAO1 / 1C / PRS 101 / LMG 12228) GN=PA5475 PE=3 SV=1	1	2	2	2	11.8	11.8	11.8	21	186	186	0	12.19	5230700	4				63	193;714	True;True	206;738	363;364;1272;1273	764;765;2565;2566	764;2565
sp|Q9HTD7|ASPA_PSEAE	sp|Q9HTD7|ASPA_PSEAE	4	4	4	>sp|Q9HTD7|ASPA_PSEAE Aspartate ammonia-lyase OS=Pseudomonas aeruginosa (strain ATCC 15692 / PAO1 / 1C / PRS 101 / LMG 12228) GN=aspA PE=3 SV=1	1	4	4	4	19.2	19.2	19.2	51.069	474	474	0	26.862	9847300	7				64	178;503;547;1014	True;True;True;True	189;520;564;1044	328;329;877;959;960;1823	670;671;1709;1893;1894;1895;1896;3693	670;1709;1893;3693
sp|Q9HTN8|RL28_PSEAE	sp|Q9HTN8|RL28_PSEAE	1	1	1	>sp|Q9HTN8|RL28_PSEAE 50S ribosomal protein L28 OS=Pseudomonas aeruginosa (strain ATCC 15692 / PAO1 / 1C / PRS 101 / LMG 12228) GN=rpmB PE=3 SV=1	1	1	1	1	12.8	12.8	12.8	9.0655	78	78	0	6.9177	5524200	2				65	344	TRUE	359	603;604	1183;1184	1183
sp|Q9HTQ0|DADA1_PSEAE	sp|Q9HTQ0|DADA1_PSEAE	4	4	4	>sp|Q9HTQ0|DADA1_PSEAE D-amino acid dehydrogenase 1 OS=Pseudomonas aeruginosa (strain ATCC 15692 / PAO1 / 1C / PRS 101 / LMG 12228) GN=dadA1 PE=1 SV=1	1	4	4	4	8.3	8.3	8.3	47.139	432	432	0	22.914	14167000	7				66	37;354;751;827	True;True;True;True	39;369;776;853	71;72;622;1338;1339;1500;1501	174;175;1213;2672;2673;2997;2998	175;1213;2672;2997
sp|Q9HTZ7|PCKA_PSEAE	sp|Q9HTZ7|PCKA_PSEAE	3	3	3	>sp|Q9HTZ7|PCKA_PSEAE Phosphoenolpyruvate carboxykinase [ATP] OS=Pseudomonas aeruginosa (strain ATCC 15692 / PAO1 / 1C / PRS 101 / LMG 12228) GN=pckA PE=3 SV=1	1	3	3	3	8.6	8.6	8.6	55.731	513	513	0	19.885	7797400	4				67	143;280;842	True;True;True	153;295;868	267;268;509;1522	560;561;1036;3026	560;1036;3026
sp|Q9HU65|GLNA_PSEAE	sp|Q9HU65|GLNA_PSEAE	4	4	4	>sp|Q9HU65|GLNA_PSEAE Glutamine synthetase OS=Pseudomonas aeruginosa (strain ATCC 15692 / PAO1 / 1C / PRS 101 / LMG 12228) GN=glnA PE=1 SV=1	1	4	4	4	12.8	12.8	12.8	51.944	469	469	0	32.106	25013000	8				68	85;155;612;780	True;True;True;True	90;165;630;806	158;287;288;1076;1077;1383;1384	352;588;589;2092;2093;2769;2770;2771	352;588;2092;2770
sp|Q9HUC8|SYR_PSEAE	sp|Q9HUC8|SYR_PSEAE	2	2	2	>sp|Q9HUC8|SYR_PSEAE Arginine--tRNA ligase OS=Pseudomonas aeruginosa (strain ATCC 15692 / PAO1 / 1C / PRS 101 / LMG 12228) GN=argS PE=3 SV=1	1	2	2	2	3.9	3.9	3.9	65.199	587	587	0	15.273	2753200	2				69	535;824	True;True	552;850	933;1493	1824;2989	1824;2989
sp|Q9HUM0|HFQ_PSEAE	sp|Q9HUM0|HFQ_PSEAE	1	1	1	>sp|Q9HUM0|HFQ_PSEAE RNA-binding protein Hfq OS=Pseudomonas aeruginosa (strain ATCC 15692 / PAO1 / 1C / PRS 101 / LMG 12228) GN=hfq PE=1 SV=1	1	1	1	1	15.9	15.9	15.9	9.1034	82	82	0.0041322	5.9936	1664400	2				70	573	TRUE	591	1011;1012	1969;1970	1969
sp|Q9HUM6|PURA_PSEAE	sp|Q9HUM6|PURA_PSEAE	4	4	4	>sp|Q9HUM6|PURA_PSEAE Adenylosuccinate synthetase OS=Pseudomonas aeruginosa (strain ATCC 15692 / PAO1 / 1C / PRS 101 / LMG 12228) GN=purA PE=3 SV=1	1	4	4	4	12.8	12.8	12.8	46.814	430	430	0	34.558	5942800	17				71	467;516;823;908	True;True;True;True	484;533;849;935	818;897;1492;1634;1635	1611;1739;2988;3201;3202;3203;3204;3205;3206;3207;3208;3209;3210;3211;3212;3213;3214	1611;1739;2988;3203
sp|Q9HUM9|RS6_PSEAE	sp|Q9HUM9|RS6_PSEAE	1	1	1	>sp|Q9HUM9|RS6_PSEAE 30S ribosomal protein S6 OS=Pseudomonas aeruginosa (strain ATCC 15692 / PAO1 / 1C / PRS 101 / LMG 12228) GN=rpsF PE=3 SV=1	1	1	1	1	7.2	7.2	7.2	16.164	139	139	0	7.2054	10483000	6				72	70	TRUE	75	133;134	311;312;313;314;315;316	311
sp|Q9HV43|DNAK_PSEAE	sp|Q9HV43|DNAK_PSEAE	11	11	11	>sp|Q9HV43|DNAK_PSEAE Chaperone protein DnaK OS=Pseudomonas aeruginosa (strain ATCC 15692 / PAO1 / 1C / PRS 101 / LMG 12228) GN=dnaK PE=3 SV=1	1	11	11	11	26.7	26.7	26.7	68.402	637	637	0	92.879	58491000	17				73	78;123;271;429;628;639;698;774;795;853;854	True;True;True;True;True;True;True;True;True;True;True	83;131;286;446;648;662;722;800;821;879;880	146;147;226;227;494;746;1104;1133;1134;1135;1244;1376;1453;1540;1541	336;337;338;493;494;1016;1419;2141;2202;2203;2204;2205;2515;2762;2923;3054;3055;3056	337;493;1016;1419;2141;2203;2515;2762;2923;3054;3056
sp|Q9HV50|GLMM_PSEAE	sp|Q9HV50|GLMM_PSEAE	1	1	1	>sp|Q9HV50|GLMM_PSEAE Phosphoglucosamine mutase OS=Pseudomonas aeruginosa (strain ATCC 15692 / PAO1 / 1C / PRS 101 / LMG 12228) GN=glmM PE=3 SV=1	1	1	1	1	2.9	2.9	2.9	47.796	445	445	0.004329	6.182	8169700	2				74	900	TRUE	927	1622;1623	3185;3186	3186
sp|Q9HV51|TPIS_PSEAE	sp|Q9HV51|TPIS_PSEAE	1	1	1	>sp|Q9HV51|TPIS_PSEAE Triosephosphate isomerase OS=Pseudomonas aeruginosa (strain ATCC 15692 / PAO1 / 1C / PRS 101 / LMG 12228) GN=tpiA PE=3 SV=1	1	1	1	1	4.8	4.8	4.8	25.621	251	251	0	6.9643	428860	3				75	108	TRUE	115	202;203	462;463;464	462
sp|Q9HV55|IF2_PSEAE	sp|Q9HV55|IF2_PSEAE	4	4	4	>sp|Q9HV55|IF2_PSEAE Translation initiation factor IF-2 OS=Pseudomonas aeruginosa (strain ATCC 15692 / PAO1 / 1C / PRS 101 / LMG 12228) GN=infB PE=3 SV=1	1	4	4	4	6.5	6.5	6.5	90.911	840	840	0	22.788	2981500	3				76	403;468;660;847	True;True;True;True	418;485;683;873	701;819;1179;1530	1344;1612;2387;3035	1344;1612;2387;3035
sp|Q9HV59|PNP_PSEAE	sp|Q9HV59|PNP_PSEAE	8	8	8	>sp|Q9HV59|PNP_PSEAE Polyribonucleotide nucleotidyltransferase OS=Pseudomonas aeruginosa (strain ATCC 15692 / PAO1 / 1C / PRS 101 / LMG 12228) GN=pnp PE=3 SV=1	1	8	8	8	17	17	17	75.452	701	701	0	64.75	54038000	18				77	34;98;104;371;381;466;735;932	True;True;True;True;True;True;True;True	36;105;111;386;396;483;759;959	67;68;182;183;194;195;650;651;667;817;1310;1311;1673;1674	170;171;426;427;428;429;430;451;452;453;1262;1263;1298;1610;2621;2622;3279;3280	170;426;451;1262;1298;1610;2622;3279
sp|Q9HVA2|ILVC_PSEAE	sp|Q9HVA2|ILVC_PSEAE	3	3	3	>sp|Q9HVA2|ILVC_PSEAE Ketol-acid reductoisomerase OS=Pseudomonas aeruginosa (strain ATCC 15692 / PAO1 / 1C / PRS 101 / LMG 12228) GN=ilvC PE=1 SV=1	1	3	3	3	13.9	13.9	13.9	36.424	338	338	0	28.997	16525000	8				78	22;333;613	True;True;True	22;348;631	34;583;584;1078	74;1142;1143;1144;1145;1146;1147;2094	74;1143;2094
sp|Q9HVC4|RL25_PSEAE	sp|Q9HVC4|RL25_PSEAE	3	3	3	>sp|Q9HVC4|RL25_PSEAE 50S ribosomal protein L25 OS=Pseudomonas aeruginosa (strain ATCC 15692 / PAO1 / 1C / PRS 101 / LMG 12228) GN=rplY PE=3 SV=1	1	3	3	3	17.2	17.2	17.2	21.962	204	204	0	19.272	15214000	6				79	181;877;887	True;True;True	193;903;913	339;340;1575;1576;1601;1602	712;713;3131;3132;3157;3158	713;3131;3158
sp|Q9HVC5|KPRS_PSEAE	sp|Q9HVC5|KPRS_PSEAE	1	1	1	>sp|Q9HVC5|KPRS_PSEAE Ribose-phosphate pyrophosphokinase OS=Pseudomonas aeruginosa (strain ATCC 15692 / PAO1 / 1C / PRS 101 / LMG 12228) GN=prs PE=3 SV=1	1	1	1	1	3.8	3.8	3.8	34.04	313	313	0.0043103	6.174	964190	2				80	454	TRUE	471	796	1563;1564	1563
sp|Q9HVF1|MQO2_PSEAE	sp|Q9HVF1|MQO2_PSEAE	1	1	1	>sp|Q9HVF1|MQO2_PSEAE Probable malate:quinone oxidoreductase 2 OS=Pseudomonas aeruginosa (strain ATCC 15692 / PAO1 / 1C / PRS 101 / LMG 12228) GN=mqo2 PE=3 SV=1	1	1	1	1	3.9	3.9	3.9	55.498	507	507	0.0042194	6.0897	809260	1				81	991	TRUE	1021	1773	3488	3488
sp|Q9HVI7|GLYA3_PSEAE;sp|Q9I138|GLYA2_PSEAE	sp|Q9HVI7|GLYA3_PSEAE	3;1	3;1	3;1	>sp|Q9HVI7|GLYA3_PSEAE Serine hydroxymethyltransferase 3 OS=Pseudomonas aeruginosa (strain ATCC 15692 / PAO1 / 1C / PRS 101 / LMG 12228) GN=glyA2 PE=3 SV=1	2	3	3	3	6.2	6.2	6.2	45.157	417	417;418	0	16.301	4496900	4				82	424;770;862	True;True;True	441;795;888	737;1368;1554;1555	1409;2719;3072;3073	1409;2719;3072
sp|Q9HVL6|RL21_PSEAE	sp|Q9HVL6|RL21_PSEAE	2	2	2	>sp|Q9HVL6|RL21_PSEAE 50S ribosomal protein L21 OS=Pseudomonas aeruginosa (strain ATCC 15692 / PAO1 / 1C / PRS 101 / LMG 12228) GN=rplU PE=3 SV=1	1	2	2	2	20.4	20.4	20.4	11.653	103	103	0	11.621	2645500	2				83	423;930	True;True	440;957	736;1671	1408;3277	1408;3277
sp|Q9HVM4|SYI_PSEAE	sp|Q9HVM4|SYI_PSEAE	4	4	4	>sp|Q9HVM4|SYI_PSEAE Isoleucine--tRNA ligase OS=Pseudomonas aeruginosa (strain ATCC 15692 / PAO1 / 1C / PRS 101 / LMG 12228) GN=ileS PE=3 SV=1	1	4	4	4	7	7	7	105.46	943	943	0	28.307	11960000	10				84	137;259;315;760	True;True;True;True	147;274;330;785	257;474;475;557;1351;1352;1353;1354	548;975;976;1107;2690;2691;2692;2693;2694;2695	548;975;1107;2691
sp|Q9HVN5|CLPB_PSEAE	sp|Q9HVN5|CLPB_PSEAE	3	1	1	>sp|Q9HVN5|CLPB_PSEAE Chaperone protein ClpB OS=Pseudomonas aeruginosa (strain ATCC 15692 / PAO1 / 1C / PRS 101 / LMG 12228) GN=clpB PE=3 SV=1	1	3	1	1	4.1	1.4	1.4	95.004	854	854	0.0079051	5.8112	164360	1				85	39;674;796	True;False;False	42;697;822	77;1204;1454	182;2431;2924	182;2431;2924
sp|Q9HVT8|GATA_PSEAE	sp|Q9HVT8|GATA_PSEAE	2	2	2	>sp|Q9HVT8|GATA_PSEAE Glutamyl-tRNA(Gln) amidotransferase subunit A OS=Pseudomonas aeruginosa (strain ATCC 15692 / PAO1 / 1C / PRS 101 / LMG 12228) GN=gatA PE=1 SV=1	1	2	2	2	6	6	6	51.862	484	484	0	11.651	1879500	1				86	394;947	True;True	409;976	686;687;1703	1324;1325;3368	1325;3368
sp|Q9HVV3|Y4465_PSEAE	sp|Q9HVV3|Y4465_PSEAE	1	1	1	>sp|Q9HVV3|Y4465_PSEAE Nucleotide-binding protein PA4465 OS=Pseudomonas aeruginosa (strain ATCC 15692 / PAO1 / 1C / PRS 101 / LMG 12228) GN=PA4465 PE=3 SV=1	1	1	1	1	8	8	8	32.218	286	286	0.0044053	6.227	617440	2				87	757	TRUE	782	1347	2683;2684	2683
sp|Q9HVY3|RS9_PSEAE	sp|Q9HVY3|RS9_PSEAE	1	1	1	>sp|Q9HVY3|RS9_PSEAE 30S ribosomal protein S9 OS=Pseudomonas aeruginosa (strain ATCC 15692 / PAO1 / 1C / PRS 101 / LMG 12228) GN=rpsI PE=3 SV=1	1	1	1	1	7.7	7.7	7.7	14.615	130	130	0.0045249	6.4088	1358700	1				88	80	TRUE	85	150	341	341
sp|Q9HW02|MURC_PSEAE	sp|Q9HW02|MURC_PSEAE	1	1	1	>sp|Q9HW02|MURC_PSEAE UDP-N-acetylmuramate--L-alanine ligase OS=Pseudomonas aeruginosa (strain ATCC 15692 / PAO1 / 1C / PRS 101 / LMG 12228) GN=murC PE=3 SV=1	1	1	1	1	2.9	2.9	2.9	51.981	480	480	0	7.6862	1532700	2				89	559	TRUE	577	983;984	1928;1929	1928
sp|Q9HW04|ARGJ_PSEAE	sp|Q9HW04|ARGJ_PSEAE	2	2	2	>sp|Q9HW04|ARGJ_PSEAE Arginine biosynthesis bifunctional protein ArgJ OS=Pseudomonas aeruginosa (strain ATCC 15692 / PAO1 / 1C / PRS 101 / LMG 12228) GN=argJ PE=3 SV=1	1	2	2	2	7.2	7.2	7.2	41.762	405	405	0	11.491	1865400	1				90	9;873	True;True	9;899	13;1570	19;3097	19;3097
sp|Q9HW11|Y4395_PSEAE	sp|Q9HW11|Y4395_PSEAE	1	1	1	>sp|Q9HW11|Y4395_PSEAE UPF0234 protein PA4395 OS=Pseudomonas aeruginosa (strain ATCC 15692 / PAO1 / 1C / PRS 101 / LMG 12228) GN=PA4395 PE=3 SV=1	1	1	1	1	6.9	6.9	6.9	18.044	159	159	0	6.8337	1512600	2				91	952	TRUE	981	1710;1711	3378;3379	3378
sp|Q9HWC5|RL11_PSEAE	sp|Q9HWC5|RL11_PSEAE	2	2	2	>sp|Q9HWC5|RL11_PSEAE 50S ribosomal protein L11 OS=Pseudomonas aeruginosa (strain ATCC 15692 / PAO1 / 1C / PRS 101 / LMG 12228) GN=rplK PE=3 SV=1	1	2	2	2	23.8	23.8	23.8	14.907	143	143	0	18.756	13861000	3				92	689;843	True;True	713;869	1231;1232;1523	2495;2496;3027	2495;3027
sp|Q9HWC7|RL10_PSEAE	sp|Q9HWC7|RL10_PSEAE	3	3	3	>sp|Q9HWC7|RL10_PSEAE 50S ribosomal protein L10 OS=Pseudomonas aeruginosa (strain ATCC 15692 / PAO1 / 1C / PRS 101 / LMG 12228) GN=rplJ PE=3 SV=1	1	3	3	3	22.3	22.3	22.3	17.634	166	166	0	19.369	6935600	5				93	10;69;136	True;True;True	10;74;146	14;132;255;256	20;309;310;546;547	20;310;546
sp|Q9HWC8|RL7_PSEAE	sp|Q9HWC8|RL7_PSEAE	1	1	1	>sp|Q9HWC8|RL7_PSEAE 50S ribosomal protein L7/L12 OS=Pseudomonas aeruginosa (strain ATCC 15692 / PAO1 / 1C / PRS 101 / LMG 12228) GN=rplL PE=3 SV=1	1	1	1	1	9	9	9	12.479	122	122	0	6.5625	5100100	3				94	145	TRUE	155	270;271	563;564;565	563
sp|Q9HWC9|RPOC_PSEAE	sp|Q9HWC9|RPOC_PSEAE	20	20	20	>sp|Q9HWC9|RPOC_PSEAE DNA-directed RNA polymerase subunit beta OS=Pseudomonas aeruginosa (strain ATCC 15692 / PAO1 / 1C / PRS 101 / LMG 12228) GN=rpoC PE=3 SV=1	1	20	20	20	19.9	19.9	19.9	154.38	1399	1399	0	140.69	139530000	66				95	20;82;122;179;230;268;326;421;530;540;548;551;597;679;718;745;788;867;931;1012	True;True;True;True;True;True;True;True;True;True;True;True;True;True;True;True;True;True;True;True	20;87;130;190;243;283;341;438;547;557;565;568;615;703;742;770;814;893;958;1042	31;32;153;154;225;330;331;332;333;425;489;490;572;573;733;734;926;927;948;949;961;962;967;968;1053;1054;1218;1219;1278;1328;1329;1437;1561;1562;1672;1819;1820	70;71;344;345;346;347;348;492;672;673;674;675;676;677;678;679;680;681;682;683;684;685;686;687;688;689;690;881;1008;1009;1010;1125;1126;1403;1404;1405;1406;1814;1815;1816;1817;1879;1880;1897;1898;1899;1904;1905;2060;2061;2062;2063;2064;2472;2473;2474;2571;2661;2662;2864;3082;3083;3084;3278;3687;3688	70;344;492;673;881;1008;1126;1403;1816;1879;1897;1905;2060;2473;2571;2661;2864;3084;3278;3688
sp|Q9HWD0|RS12_PSEAE	sp|Q9HWD0|RS12_PSEAE	1	1	1	>sp|Q9HWD0|RS12_PSEAE 30S ribosomal protein S12 OS=Pseudomonas aeruginosa (strain ATCC 15692 / PAO1 / 1C / PRS 101 / LMG 12228) GN=rpsL PE=3 SV=1	1	1	1	1	6.5	6.5	6.5	13.799	123	123	0.0078431	5.7823	3119300	2				96	128	TRUE	136	233;234	505;506	505
sp|Q9HWD1|RS7_PSEAE	sp|Q9HWD1|RS7_PSEAE	2	2	2	>sp|Q9HWD1|RS7_PSEAE 30S ribosomal protein S7 OS=Pseudomonas aeruginosa (strain ATCC 15692 / PAO1 / 1C / PRS 101 / LMG 12228) GN=rpsG PE=3 SV=1	1	2	2	2	17.9	17.9	17.9	17.504	156	156	0	12.428	2880700	2				97	72;902	True;True	77;929	137;1626	323;3191	323;3191
sp|Q9HWD2|EFG1_PSEAE;sp|Q9I244|EFG2_PSEAE	sp|Q9HWD2|EFG1_PSEAE	20;6	20;6	20;6	>sp|Q9HWD2|EFG1_PSEAE Elongation factor G 1 OS=Pseudomonas aeruginosa (strain ATCC 15692 / PAO1 / 1C / PRS 101 / LMG 12228) GN=fusA PE=1 SV=1	2	20	20	20	43.3	43.3	43.3	77.784	706	706;702	0	202.78	263220000	98				98	38;46;124;132;220;297;355;360;378;380;401;505;529;610;663;776;889;990;1000;1013	True;True;True;True;True;True;True;True;True;True;True;True;True;True;True;True;True;True;True;True	40;41;49;132;140;233;312;370;375;393;395;416;522;546;628;686;802;915;1020;1030;1043	73;74;75;76;90;228;229;246;410;533;534;623;624;632;633;661;662;663;665;666;698;699;879;880;924;925;1072;1073;1183;1184;1378;1379;1604;1605;1606;1771;1772;1788;1789;1821;1822	176;177;178;179;180;181;202;203;495;496;497;527;857;1068;1069;1214;1215;1216;1227;1228;1229;1230;1273;1274;1275;1276;1277;1278;1279;1280;1281;1282;1283;1284;1285;1286;1287;1288;1289;1292;1293;1294;1295;1296;1297;1338;1339;1340;1341;1342;1711;1712;1713;1714;1715;1801;1802;1803;1804;1805;1806;1807;1808;1809;1810;1811;1812;1813;2086;2087;2088;2089;2392;2393;2394;2764;2765;3161;3162;3163;3164;3165;31…	178;202;495;527;857;1068;1216;1229;1273;1293;1338;1711;1802;2086;2394;2764;3161;3482;3510;3691	16	666
sp|Q9HWD5|RL3_PSEAE	sp|Q9HWD5|RL3_PSEAE	3	3	3	>sp|Q9HWD5|RL3_PSEAE 50S ribosomal protein L3 OS=Pseudomonas aeruginosa (strain ATCC 15692 / PAO1 / 1C / PRS 101 / LMG 12228) GN=rplC PE=3 SV=1	1	3	3	3	22.7	22.7	22.7	22.591	211	211	0	22.405	25072000	8				99	309;417;972	True;True;True	324;434;1002	550;724;725;1744;1745	1095;1390;1391;1392;1393;3443;3444;3445;3446	1095;1392;3445
sp|Q9HWD8|RL2_PSEAE	sp|Q9HWD8|RL2_PSEAE	4	4	4	>sp|Q9HWD8|RL2_PSEAE 50S ribosomal protein L2 OS=Pseudomonas aeruginosa (strain ATCC 15692 / PAO1 / 1C / PRS 101 / LMG 12228) GN=rplB PE=3 SV=1	1	4	4	4	21.6	21.6	21.6	29.579	273	273	0	35.178	44756000	14				100	129;370;372;728	True;True;True;True	137;385;387;752	235;236;237;238;239;240;241;648;649;652;1295;1296	507;508;509;510;511;512;513;514;1256;1257;1258;1259;1260;1261;1264;2600;2601	512;1259;1264;2600
sp|Q9HWE0|RL22_PSEAE	sp|Q9HWE0|RL22_PSEAE	3	3	3	>sp|Q9HWE0|RL22_PSEAE 50S ribosomal protein L22 OS=Pseudomonas aeruginosa (strain ATCC 15692 / PAO1 / 1C / PRS 101 / LMG 12228) GN=rplV PE=3 SV=1	1	3	3	3	40	40	40	11.911	110	110	0	19.054	8267500	5				101	899;926;968	True;True;True	926;953;998	1620;1621;1664;1739	3183;3184;3269;3437;3438	3184;3269;3438
sp|Q9HWE1|RS3_PSEAE	sp|Q9HWE1|RS3_PSEAE	2	2	2	>sp|Q9HWE1|RS3_PSEAE 30S ribosomal protein S3 OS=Pseudomonas aeruginosa (strain ATCC 15692 / PAO1 / 1C / PRS 101 / LMG 12228) GN=rpsC PE=3 SV=1	1	2	2	2	10.1	10.1	10.1	25.838	228	228	0	12.671	2777000	2				102	684;701	True;True	708;725	1226;1248	2490;2520	2490;2520
sp|Q9HWE2|RL16_PSEAE	sp|Q9HWE2|RL16_PSEAE	3	3	3	>sp|Q9HWE2|RL16_PSEAE 50S ribosomal protein L16 OS=Pseudomonas aeruginosa (strain ATCC 15692 / PAO1 / 1C / PRS 101 / LMG 12228) GN=rplP PE=3 SV=1	1	3	3	3	23.4	23.4	23.4	15.401	137	137	0	20.463	24629000	7				103	570;934;965	True;True;True	588;961;995	1005;1006;1677;1678;1734;1735	1962;1963;1964;3283;3284;3432;3433	1963;3283;3432
sp|Q9HWE5|RL14_PSEAE	sp|Q9HWE5|RL14_PSEAE	3	3	3	>sp|Q9HWE5|RL14_PSEAE 50S ribosomal protein L14 OS=Pseudomonas aeruginosa (strain ATCC 15692 / PAO1 / 1C / PRS 101 / LMG 12228) GN=rplN PE=3 SV=1	1	3	3	3	31.1	31.1	31.1	13.412	122	122	0	35.627	27779000	9				104	270;620;1001	True;True;True	285;639;1031	492;493;1089;1090;1790;1791	1012;1013;1014;1015;2114;2115;3516;3517;3518	1012;2114;3517
sp|Q9HWE7|RL5_PSEAE	sp|Q9HWE7|RL5_PSEAE	2	2	2	>sp|Q9HWE7|RL5_PSEAE 50S ribosomal protein L5 OS=Pseudomonas aeruginosa (strain ATCC 15692 / PAO1 / 1C / PRS 101 / LMG 12228) GN=rplE PE=3 SV=1	1	2	2	2	11.2	11.2	11.2	20.392	179	179	0	11.428	2604200	2				105	458;555	True;True	475;572	802;974	1577;1913	1577;1913
sp|Q9HWE8|RS14_PSEAE	sp|Q9HWE8|RS14_PSEAE	1	1	1	>sp|Q9HWE8|RS14_PSEAE 30S ribosomal protein S14 OS=Pseudomonas aeruginosa (strain ATCC 15692 / PAO1 / 1C / PRS 101 / LMG 12228) GN=rpsN PE=3 SV=1	1	1	1	1	12.9	12.9	12.9	11.565	101	101	0	8.9813	5310000	3				106	63	TRUE	68	123;124	297;298;299	297
sp|Q9HWE9|RS8_PSEAE	sp|Q9HWE9|RS8_PSEAE	2	2	2	>sp|Q9HWE9|RS8_PSEAE 30S ribosomal protein S8 OS=Pseudomonas aeruginosa (strain ATCC 15692 / PAO1 / 1C / PRS 101 / LMG 12228) GN=rpsH PE=3 SV=1	1	2	2	2	18.5	18.5	18.5	14.17	130	130	0	12.711	9827100	2				107	334;764	True;True	349;789	585;586;1360	1148;1149;2711	1149;2711
sp|Q9HWF1|RL18_PSEAE	sp|Q9HWF1|RL18_PSEAE	2	2	2	>sp|Q9HWF1|RL18_PSEAE 50S ribosomal protein L18 OS=Pseudomonas aeruginosa (strain ATCC 15692 / PAO1 / 1C / PRS 101 / LMG 12228) GN=rplR PE=3 SV=1	1	2	2	2	18.1	18.1	18.1	12.661	116	116	0	12.668	6818900	4				108	4;923	True;True	4;950	4;5;1660	5;6;7;3265	7;3265
sp|Q9HWF2|RS5_PSEAE	sp|Q9HWF2|RS5_PSEAE	3	3	3	>sp|Q9HWF2|RS5_PSEAE 30S ribosomal protein S5 OS=Pseudomonas aeruginosa (strain ATCC 15692 / PAO1 / 1C / PRS 101 / LMG 12228) GN=rpsE PE=3 SV=1	1	3	3	3	26.5	26.5	26.5	17.625	166	166	0	31.14	30151000	10				109	139;671;989	True;True;True	149;694;1019	260;261;1199;1200;1769;1770	552;553;554;2420;2421;2422;2423;3479;3480;3481	554;2421;3479
sp|Q9HWF7|RS13_PSEAE	sp|Q9HWF7|RS13_PSEAE	3	3	3	>sp|Q9HWF7|RS13_PSEAE 30S ribosomal protein S13 OS=Pseudomonas aeruginosa (strain ATCC 15692 / PAO1 / 1C / PRS 101 / LMG 12228) GN=rpsM PE=3 SV=1	1	3	3	3	19.5	19.5	19.5	13.265	118	118	0	20.824	15076000	3				110	183;397;433	True;True;True	195;412;450	342;693;694;753;754	716;1333;1334;1432;1433	716;1333;1433
sp|Q9HWF8|RS11_PSEAE	sp|Q9HWF8|RS11_PSEAE	1	1	1	>sp|Q9HWF8|RS11_PSEAE 30S ribosomal protein S11 OS=Pseudomonas aeruginosa (strain ATCC 15692 / PAO1 / 1C / PRS 101 / LMG 12228) GN=rpsK PE=3 SV=1	1	1	1	1	12.4	12.4	12.4	13.629	129	129	0	7.0202	1191500	1				111	704	TRUE	728	1252	2528	2528
sp|Q9HWZ6|IPYR_PSEAE	sp|Q9HWZ6|IPYR_PSEAE	2	2	2	>sp|Q9HWZ6|IPYR_PSEAE Inorganic pyrophosphatase OS=Pseudomonas aeruginosa (strain ATCC 15692 / PAO1 / 1C / PRS 101 / LMG 12228) GN=ppa PE=1 SV=1	1	2	2	2	14.3	14.3	14.3	19.396	175	175	0	14.259	6543500	6				112	263;885	True;True	278;911	481;482;1598	992;993;994;995;996;3154	993;3154
sp|Q9HX33|SYL_PSEAE	sp|Q9HX33|SYL_PSEAE	2	2	2	>sp|Q9HX33|SYL_PSEAE Leucine--tRNA ligase OS=Pseudomonas aeruginosa (strain ATCC 15692 / PAO1 / 1C / PRS 101 / LMG 12228) GN=leuS PE=3 SV=1	1	2	2	2	3.8	3.8	3.8	97.647	873	873	0	15.161	2457700	4				113	336;1004	True;True	351;1034	589;590;1795	1154;1155;3522;3523	1154;3523
sp|Q9HXH0|SYV_PSEAE	sp|Q9HXH0|SYV_PSEAE	1	1	1	>sp|Q9HXH0|SYV_PSEAE Valine--tRNA ligase OS=Pseudomonas aeruginosa (strain ATCC 15692 / PAO1 / 1C / PRS 101 / LMG 12228) GN=valS PE=1 SV=1	1	1	1	1	2.2	2.2	2.2	107.71	950	950	0	7.4841	1734600	4				114	361	TRUE	376	634;635	1231;1232;1233;1234	1231
sp|Q9HXL8|EX7L_PSEAE	sp|Q9HXL8|EX7L_PSEAE	1	1	1	>sp|Q9HXL8|EX7L_PSEAE Exodeoxyribonuclease 7 large subunit OS=Pseudomonas aeruginosa (strain ATCC 15692 / PAO1 / 1C / PRS 101 / LMG 12228) GN=xseA PE=3 SV=1	1	1	1	1	2.4	2.4	2.4	51.231	459	459	0.0077821	5.7487	735940	1				115	257	TRUE	272	471	971	971
sp|Q9HXM6|GUAA_PSEAE	sp|Q9HXM6|GUAA_PSEAE	4	4	4	>sp|Q9HXM6|GUAA_PSEAE GMP synthase [glutamine-hydrolyzing] OS=Pseudomonas aeruginosa (strain ATCC 15692 / PAO1 / 1C / PRS 101 / LMG 12228) GN=guaA PE=3 SV=1	1	4	4	4	9.7	9.7	9.7	57.959	525	525	0	28.546	5258200	4				116	102;282;422;495	True;True;True;True	109;297;439;512	191;511;735;864	447;1039;1407;1690	447;1039;1407;1690
sp|Q9HXN2|PUR4_PSEAE	sp|Q9HXN2|PUR4_PSEAE	1	1	1	>sp|Q9HXN2|PUR4_PSEAE Phosphoribosylformylglycinamidine synthase OS=Pseudomonas aeruginosa (strain ATCC 15692 / PAO1 / 1C / PRS 101 / LMG 12228) GN=purL PE=3 SV=1	1	1	1	1	1.1	1.1	1.1	140.65	1298	1298	0	6.99	901610	1				117	970	TRUE	1000	1741	3440	3440
sp|Q9HXZ2|ACCA_PSEAE	sp|Q9HXZ2|ACCA_PSEAE	1	1	1	>sp|Q9HXZ2|ACCA_PSEAE Acetyl-coenzyme A carboxylase carboxyl transferase subunit alpha OS=Pseudomonas aeruginosa (strain ATCC 15692 / PAO1 / 1C / PRS 101 / LMG 12228) GN=accA PE=1 SV=1	1	1	1	1	5.1	5.1	5.1	34.947	316	316	0	9.2736	2071800	1				118	594	TRUE	612	1049	2055	2055
sp|Q9HXZ4|PYRG_PSEAE	sp|Q9HXZ4|PYRG_PSEAE	3	3	3	>sp|Q9HXZ4|PYRG_PSEAE CTP synthase OS=Pseudomonas aeruginosa (strain ATCC 15692 / PAO1 / 1C / PRS 101 / LMG 12228) GN=pyrG PE=3 SV=1	1	3	3	3	7.6	7.6	7.6	59.617	542	542	0	25.212	5343900	5				119	449;806;852	True;True;True	466;832;878	790;1466;1538;1539	1555;2940;2941;3052;3053	1555;2940;3052
sp|Q9HXZ5|ENO_PSEAE	sp|Q9HXZ5|ENO_PSEAE	6	6	6	>sp|Q9HXZ5|ENO_PSEAE Enolase OS=Pseudomonas aeruginosa (strain ATCC 15692 / PAO1 / 1C / PRS 101 / LMG 12228) GN=eno PE=3 SV=1	1	6	6	6	23.3	23.3	23.3	45.195	429	429	0	53.502	18334000	11				120	134;293;345;357;891;958	True;True;True;True;True;True	144;308;360;372;917;987	252;527;528;605;627;628;1608;1720	542;1062;1063;1185;1219;1220;1221;1222;1223;3168;3402	542;1062;1185;1222;3168;3402
sp|Q9HYC7|SYM_PSEAE	sp|Q9HYC7|SYM_PSEAE	1	1	1	>sp|Q9HYC7|SYM_PSEAE Methionine--tRNA ligase OS=Pseudomonas aeruginosa (strain ATCC 15692 / PAO1 / 1C / PRS 101 / LMG 12228) GN=metG PE=3 SV=1	1	1	1	1	2.2	2.2	2.2	74.903	677	677	0	7.2501	900550	1				121	373	TRUE	388	653	1265	1265
sp|Q9HYR2|FABH_PSEAE	sp|Q9HYR2|FABH_PSEAE	1	1	1	>sp|Q9HYR2|FABH_PSEAE 3-oxoacyl-[acyl-carrier-protein] synthase 3 OS=Pseudomonas aeruginosa (strain ATCC 15692 / PAO1 / 1C / PRS 101 / LMG 12228) GN=fabH PE=1 SV=1	1	1	1	1	7.6	7.6	7.6	34.003	330	330	0	6.5712	1380000	1				122	983	TRUE	1013	1760	3469	3469
sp|Q9HYR3|Y3332_PSEAE	sp|Q9HYR3|Y3332_PSEAE	3	3	3	>sp|Q9HYR3|Y3332_PSEAE Uncharacterized PhzA/B-like protein PA3332 OS=Pseudomonas aeruginosa (strain ATCC 15692 / PAO1 / 1C / PRS 101 / LMG 12228) GN=PA3332 PE=1 SV=1	1	3	3	3	22	22	22	15.92	141	141	0	18.029	5855600	3				123	165;392;504	True;True;True	176;407;521	305;683;878	634;1321;1710	634;1321;1710
sp|Q9HYR9|CLPP2_PSEAE	sp|Q9HYR9|CLPP2_PSEAE	1	1	1	>sp|Q9HYR9|CLPP2_PSEAE ATP-dependent Clp protease proteolytic subunit 2 OS=Pseudomonas aeruginosa (strain ATCC 15692 / PAO1 / 1C / PRS 101 / LMG 12228) GN=clpP2 PE=3 SV=1	1	1	1	1	6	6	6	22.142	201	201	0	9.1584	2111000	3				124	414	TRUE	430	718;719	1376;1377;1378	1377
sp|Q9HZ71|RS1_PSEAE	sp|Q9HZ71|RS1_PSEAE	14	14	14	>sp|Q9HZ71|RS1_PSEAE 30S ribosomal protein S1 OS=Pseudomonas aeruginosa (strain ATCC 15692 / PAO1 / 1C / PRS 101 / LMG 12228) GN=rpsA PE=3 SV=1	1	14	14	14	34	34	34	61.869	559	559	0	127.65	139880000	44				125	45;210;308;310;332;483;703;711;713;739;742;769;789;898	True;True;True;True;True;True;True;True;True;True;True;True;True;True	48;223;323;325;347;500;727;735;737;764;767;794;815;925	88;89;392;393;548;549;551;582;842;843;1251;1266;1267;1270;1271;1318;1319;1323;1324;1367;1438;1439;1619	200;201;830;831;832;833;834;835;1087;1088;1089;1090;1091;1092;1093;1094;1096;1140;1141;1643;1644;2527;2548;2549;2550;2551;2561;2562;2563;2564;2636;2637;2638;2647;2648;2649;2650;2651;2652;2653;2718;2865;2866;2867;2868;3182	200;832;1092;1096;1141;1643;2527;2549;2562;2636;2648;2718;2865;3182
sp|Q9HZ76|WBPE_PSEAE	sp|Q9HZ76|WBPE_PSEAE	5	5	5	>sp|Q9HZ76|WBPE_PSEAE UDP-2-acetamido-2-deoxy-3-oxo-D-glucuronate aminotransferase OS=Pseudomonas aeruginosa (strain ATCC 15692 / PAO1 / 1C / PRS 101 / LMG 12228) GN=wbpE PE=1 SV=1	1	5	5	5	20.1	20.1	20.1	38.924	359	359	0	45.061	35268000	15				126	3;515;861;864;1008	True;True;True;True;True	3;532;887;890;1038	3;895;896;1552;1553;1558;1813;1814	4;1737;1738;3068;3069;3070;3071;3077;3078;3676;3677;3678;3679;3680;3681	4;1737;3068;3077;3676
sp|Q9HZA7|ACCD_PSEAE	sp|Q9HZA7|ACCD_PSEAE	2	2	2	>sp|Q9HZA7|ACCD_PSEAE Acetyl-coenzyme A carboxylase carboxyl transferase subunit beta OS=Pseudomonas aeruginosa (strain ATCC 15692 / PAO1 / 1C / PRS 101 / LMG 12228) GN=accD PE=1 SV=1	1	2	2	2	10.3	10.3	10.3	31.843	290	290	0	15.288	6629100	3				127	502;632	True;True	519;652	875;876;1110	1707;1708;2147	1708;2147
sp|Q9HZE0|DHE2_PSEAE	sp|Q9HZE0|DHE2_PSEAE	21	21	21	>sp|Q9HZE0|DHE2_PSEAE NAD-specific glutamate dehydrogenase OS=Pseudomonas aeruginosa (strain ATCC 15692 / PAO1 / 1C / PRS 101 / LMG 12228) GN=gdhB PE=1 SV=1	1	21	21	21	16.4	16.4	16.4	182.64	1620	1620	0	150.41	101320000	38				128	64;68;75;105;160;191;235;249;368;451;452;519;556;563;635;654;752;835;910;927;1018	True;True;True;True;True;True;True;True;True;True;True;True;True;True;True;True;True;True;True;True;True	69;73;80;112;170;204;248;264;383;468;469;536;573;581;655;677;777;861;937;954;1048	125;131;142;143;196;197;295;360;433;434;460;644;792;793;901;902;975;990;991;992;1114;1115;1170;1340;1512;1513;1637;1665;1666;1831;1832	300;308;331;332;333;454;455;456;457;610;759;760;897;898;899;900;951;1248;1557;1558;1746;1747;1748;1749;1914;1937;1938;1939;2152;2153;2375;2674;3016;3017;3216;3270;3271;3272;3706;3707;3708	300;308;331;455;610;759;897;951;1248;1557;1558;1746;1914;1937;2152;2375;2674;3016;3216;3271;3708
sp|Q9HZJ2|FADB_PSEAE	sp|Q9HZJ2|FADB_PSEAE	4	4	4	>sp|Q9HZJ2|FADB_PSEAE Fatty acid oxidation complex subunit alpha OS=Pseudomonas aeruginosa (strain ATCC 15692 / PAO1 / 1C / PRS 101 / LMG 12228) GN=fadB PE=3 SV=1	1	4	4	4	10.2	10.2	10.2	76.953	715	715	0	36.172	10423000	4				129	330;813;848;895	True;True;True;True	345;839;874;922	580;1478;1531;1615	1137;1138;2971;3036;3177	1137;2971;3036;3177
sp|Q9HZP5|ETFD_PSEAE	sp|Q9HZP5|ETFD_PSEAE	1	1	1	>sp|Q9HZP5|ETFD_PSEAE Electron transfer flavoprotein-ubiquinone oxidoreductase OS=Pseudomonas aeruginosa (strain ATCC 15692 / PAO1 / 1C / PRS 101 / LMG 12228) GN=PA2953 PE=1 SV=1	1	1	1	1	3.4	3.4	3.4	59.928	551	551	0	7.8465	1209700	2				130	238	TRUE	251	438	904;905	904
sp|Q9HZP6|ETFB_PSEAE	sp|Q9HZP6|ETFB_PSEAE	3	3	3	>sp|Q9HZP6|ETFB_PSEAE Electron transfer flavoprotein subunit beta OS=Pseudomonas aeruginosa (strain ATCC 15692 / PAO1 / 1C / PRS 101 / LMG 12228) GN=etfB PE=3 SV=1	1	3	3	3	23.7	23.7	23.7	26.376	249	249	0	22.783	10098000	8				131	229;691;797	True;True;True	242;715;823	421;422;423;424;1234;1455	874;875;876;877;878;879;880;2498;2925	880;2498;2925
sp|Q9HZZ2|EFP_PSEAE	sp|Q9HZZ2|EFP_PSEAE	4	4	4	>sp|Q9HZZ2|EFP_PSEAE Elongation factor P OS=Pseudomonas aeruginosa (strain ATCC 15692 / PAO1 / 1C / PRS 101 / LMG 12228) GN=efp PE=1 SV=1	1	4	4	4	28.2	28.2	28.2	20.985	188	188	0	34.873	10894000	5				132	19;52;667;916	True;True;True;True	19;55;690;943	30;100;1190;1191;1645	69;231;2401;2402;3225	69;231;2401;3225
sp|Q9I047|TAL_PSEAE	sp|Q9I047|TAL_PSEAE	1	1	1	>sp|Q9I047|TAL_PSEAE Transaldolase OS=Pseudomonas aeruginosa (strain ATCC 15692 / PAO1 / 1C / PRS 101 / LMG 12228) GN=tal PE=3 SV=1	1	1	1	1	4.9	4.9	4.9	33.946	307	307	0	6.9729	309310	1				133	202	TRUE	215	379	805	805
sp|Q9I0J5|NUOH_PSEAE	sp|Q9I0J5|NUOH_PSEAE	1	1	1	>sp|Q9I0J5|NUOH_PSEAE NADH-quinone oxidoreductase subunit H OS=Pseudomonas aeruginosa (strain ATCC 15692 / PAO1 / 1C / PRS 101 / LMG 12228) GN=nuoH PE=3 SV=1	1	1	1	1	4.5	4.5	4.5	36.743	331	331	0	7.3838	1448800	1				134	905	TRUE	932	1630	3197	3197
sp|Q9I0J6|NUOG_PSEAE	sp|Q9I0J6|NUOG_PSEAE	9	9	9	>sp|Q9I0J6|NUOG_PSEAE NADH-quinone oxidoreductase subunit G OS=Pseudomonas aeruginosa (strain ATCC 15692 / PAO1 / 1C / PRS 101 / LMG 12228) GN=nuoG PE=3 SV=1	1	9	9	9	14.5	14.5	14.5	98.999	905	905	0	59.123	18294000	14				135	120;275;278;319;513;539;577;588;980	True;True;True;True;True;True;True;True;True	128;290;293;334;530;556;595;606;1010	222;223;499;505;506;562;892;947;1018;1036;1037;1756	489;490;1021;1029;1030;1113;1733;1878;1978;1979;1980;1981;1982;2016;2017;3463	490;1021;1029;1113;1733;1878;1979;2016;3463
sp|Q9I0J7|NUOF_PSEAE	sp|Q9I0J7|NUOF_PSEAE	1	1	1	>sp|Q9I0J7|NUOF_PSEAE NADH-quinone oxidoreductase subunit F OS=Pseudomonas aeruginosa (strain ATCC 15692 / PAO1 / 1C / PRS 101 / LMG 12228) GN=nuoF PE=3 SV=1	1	1	1	1	4.9	4.9	4.9	48.678	448	448	0	7.8365	2022100	3				136	320	TRUE	335	563;564	1114;1115;1116	1115
sp|Q9I0J9|NUOCD_PSEAE	sp|Q9I0J9|NUOCD_PSEAE	3	3	3	>sp|Q9I0J9|NUOCD_PSEAE NADH-quinone oxidoreductase subunit C/D OS=Pseudomonas aeruginosa (strain ATCC 15692 / PAO1 / 1C / PRS 101 / LMG 12228) GN=nuoC PE=3 SV=1	1	3	3	3	6.9	6.9	6.9	68.322	593	593	0	19.54	6805400	3				137	126;409;699	True;True;True	134;425;723	231;711;712;1245	500;1356;1357;2516	500;1357;2516
sp|Q9I0K0|NUOB_PSEAE	sp|Q9I0K0|NUOB_PSEAE	1	1	1	>sp|Q9I0K0|NUOB_PSEAE NADH-quinone oxidoreductase subunit B OS=Pseudomonas aeruginosa (strain ATCC 15692 / PAO1 / 1C / PRS 101 / LMG 12228) GN=nuoB PE=3 SV=1	1	1	1	1	6.7	6.7	6.7	25.425	225	225	0	7.9062	1606800	2				138	405	TRUE	420	704;705	1347;1348	1348
sp|Q9I0K4|ACEA_PSEAE	sp|Q9I0K4|ACEA_PSEAE	9	9	9	>sp|Q9I0K4|ACEA_PSEAE Isocitrate lyase OS=Pseudomonas aeruginosa (strain ATCC 15692 / PAO1 / 1C / PRS 101 / LMG 12228) GN=PA2634 PE=1 SV=1	1	9	9	9	20.9	20.9	20.9	58.886	531	531	0	70.326	50456000	15				139	237;386;508;558;661;716;803;804;971	True;True;True;True;True;True;True;True;True	250;401;525;576;684;740;829;830;1001	436;437;673;884;885;981;982;1180;1275;1276;1463;1464;1742;1743	902;903;1308;1721;1722;1925;1926;1927;2388;2568;2569;2937;2938;3441;3442	902;1308;1722;1925;2388;2568;2937;2938;3442
sp|Q9I137|GCSP1_PSEAE	sp|Q9I137|GCSP1_PSEAE	1	1	1	>sp|Q9I137|GCSP1_PSEAE Glycine dehydrogenase (decarboxylating) 1 OS=Pseudomonas aeruginosa (strain ATCC 15692 / PAO1 / 1C / PRS 101 / LMG 12228) GN=gcvP1 PE=3 SV=1	1	1	1	1	2.2	2.2	2.2	103.92	959	959	0.0042553	6.153	4337700	2				140	365	TRUE	380	640;641	1242;1243	1242
sp|Q9I165|TREA_PSEAE	sp|Q9I165|TREA_PSEAE	1	1	1	>sp|Q9I165|TREA_PSEAE Periplasmic trehalase OS=Pseudomonas aeruginosa (strain ATCC 15692 / PAO1 / 1C / PRS 101 / LMG 12228) GN=treA PE=3 SV=1	1	1	1	1	1.7	1.7	1.7	61.165	545	545	0.004065	5.9305	0	1				141	487	TRUE	504	849	1665	1665
sp|Q9I1L9|DLDH1_PSEAE	sp|Q9I1L9|DLDH1_PSEAE	1	1	1	>sp|Q9I1L9|DLDH1_PSEAE Dihydrolipoyl dehydrogenase OS=Pseudomonas aeruginosa (strain ATCC 15692 / PAO1 / 1C / PRS 101 / LMG 12228) GN=lpdV PE=1 SV=1	1	1	1	1	3.2	3.2	3.2	48.588	464	464	0	7.1623	1397700	1				142	915	TRUE	942	1644	3224	3224
sp|Q9I1S2|HCNB_PSEAE	sp|Q9I1S2|HCNB_PSEAE	3	3	3	>sp|Q9I1S2|HCNB_PSEAE Hydrogen cyanide synthase subunit HcnB OS=Pseudomonas aeruginosa (strain ATCC 15692 / PAO1 / 1C / PRS 101 / LMG 12228) GN=hcnB PE=1 SV=1	1	3	3	3	7.5	7.5	7.5	50.388	464	464	0	20.45	4443700	3				143	55;76;209	True;True;True	58;81;222	103;144;391	234;334;829	234;334;829
sp|Q9I291|GALU_PSEAE	sp|Q9I291|GALU_PSEAE	1	1	1	>sp|Q9I291|GALU_PSEAE UTP--glucose-1-phosphate uridylyltransferase OS=Pseudomonas aeruginosa (strain ATCC 15692 / PAO1 / 1C / PRS 101 / LMG 12228) GN=galU PE=3 SV=1	1	1	1	1	6.5	6.5	6.5	31.236	279	279	0.0039683	5.8374	1519500	1				144	1011	TRUE	1041	1818	3686	3686
sp|Q9I2A8|ATOB_PSEAE	sp|Q9I2A8|ATOB_PSEAE	4	4	4	>sp|Q9I2A8|ATOB_PSEAE Acetyl-CoA acetyltransferase OS=Pseudomonas aeruginosa (strain ATCC 15692 / PAO1 / 1C / PRS 101 / LMG 12228) GN=atoB PE=3 SV=1	1	4	4	4	17.6	17.6	17.6	40.405	393	393	0	23.671	9195600	5				145	79;219;400;802	True;True;True;True	84;232;415;828	148;149;409;697;1462	339;340;856;1337;2935;2936	340;856;1337;2936
sp|Q9I2U1|CLPP1_PSEAE	sp|Q9I2U1|CLPP1_PSEAE	1	1	1	>sp|Q9I2U1|CLPP1_PSEAE ATP-dependent Clp protease proteolytic subunit 1 OS=Pseudomonas aeruginosa (strain ATCC 15692 / PAO1 / 1C / PRS 101 / LMG 12228) GN=clpP1 PE=3 SV=1	1	1	1	1	3.3	3.3	3.3	23.502	213	213	0.0042373	6.0972	0	1				146	148	TRUE	158	276	572	572
sp|Q9I2V5|ACNB_PSEAE	sp|Q9I2V5|ACNB_PSEAE	20	20	20	>sp|Q9I2V5|ACNB_PSEAE Aconitate hydratase B OS=Pseudomonas aeruginosa (strain ATCC 15692 / PAO1 / 1C / PRS 101 / LMG 12228) GN=acnB PE=3 SV=1	1	20	20	20	33.5	33.5	33.5	93.627	869	869	0	170.31	172840000	77				147	12;33;49;164;170;184;329;435;448;524;569;574;624;636;677;790;841;949;960;996	True;True;True;True;True;True;True;True;True;True;True;True;True;True;True;True;True;True;True;True	12;35;52;175;181;196;344;452;465;541;587;592;643;656;657;701;816;867;978;989;1026	16;17;18;65;66;95;96;303;304;313;343;344;578;579;756;757;758;789;910;911;912;913;1002;1003;1004;1013;1096;1097;1116;1117;1118;1119;1120;1214;1215;1216;1440;1441;1520;1521;1706;1707;1723;1724;1782;1783	22;23;24;25;26;27;28;29;166;167;168;169;225;226;227;630;631;632;633;652;717;718;1135;1136;1435;1436;1437;1438;1439;1553;1554;1758;1759;1760;1761;1762;1763;1764;1765;1766;1767;1768;1769;1955;1956;1957;1958;1959;1960;1961;1971;2123;2124;2125;2154;2155;2156;2157;2158;2159;2463;2464;2465;2466;2467;2468;2469;2470;2869;2870;2871;3024;3025;3372;3373;3374;3375;3406;3407;3408;3503;3504	22;166;226;630;652;718;1136;1435;1553;1759;1960;1971;2124;2157;2470;2871;3025;3372;3408;3504	17;18	411;423
sp|Q9I3C5|HTPG_PSEAE	sp|Q9I3C5|HTPG_PSEAE	1	1	1	>sp|Q9I3C5|HTPG_PSEAE Chaperone protein HtpG OS=Pseudomonas aeruginosa (strain ATCC 15692 / PAO1 / 1C / PRS 101 / LMG 12228) GN=htpG PE=3 SV=1	1	1	1	1	2.7	2.7	2.7	71.667	634	634	0	7.3161	2000100	1				148	272	TRUE	287	495	1017	1017
sp|Q9I3D1|DLDH2_PSEAE	sp|Q9I3D1|DLDH2_PSEAE	11	11	11	>sp|Q9I3D1|DLDH2_PSEAE Dihydrolipoyl dehydrogenase OS=Pseudomonas aeruginosa (strain ATCC 15692 / PAO1 / 1C / PRS 101 / LMG 12228) GN=lpdG PE=3 SV=1	1	11	11	11	30.5	30.5	30.5	50.164	478	478	0	100.08	154680000	45				149	30;81;91;109;113;288;383;542;668;724;850	True;True;True;True;True;True;True;True;True;True;True	32;86;96;97;116;120;121;303;398;559;691;748;876	60;61;151;152;168;169;170;204;205;211;212;213;520;669;670;952;1192;1193;1287;1288;1534;1535	156;157;158;159;160;161;162;342;343;372;373;374;375;376;465;466;467;473;474;475;476;477;478;1053;1300;1301;1302;1303;1304;1883;1884;2403;2404;2405;2406;2407;2408;2587;2588;3041;3042;3043;3044;3045;3046	157;342;372;465;475;1053;1301;1884;2404;2587;3041	19;20	336;394
sp|Q9I3D2|ODO2_PSEAE	sp|Q9I3D2|ODO2_PSEAE	5	5	5	>sp|Q9I3D2|ODO2_PSEAE Dihydrolipoyllysine-residue succinyltransferase component of 2-oxoglutarate dehydrogenase complex OS=Pseudomonas aeruginosa (strain ATCC 15692 / PAO1 / 1C / PRS 101 / LMG 12228) GN=sucB PE=3 SV=1	1	5	5	5	23.5	23.5	23.5	42.887	409	409	0	34.28	22492000	11				150	103;177;358;562;642	True;True;True;True;True	110;188;373;580;665	192;193;327;629;630;989;1140;1141	448;449;450;669;1224;1225;1935;1936;2212;2213;2214	450;669;1224;1935;2214
sp|Q9I3F5|ACNA_PSEAE	sp|Q9I3F5|ACNA_PSEAE	10	10	10	>sp|Q9I3F5|ACNA_PSEAE Aconitate hydratase A OS=Pseudomonas aeruginosa (strain ATCC 15692 / PAO1 / 1C / PRS 101 / LMG 12228) GN=acnA PE=3 SV=1	1	10	10	10	15.3	15.3	15.3	99.147	910	910	0	79.773	54375000	26				151	66;225;299;408;444;499;924;929;992;1017	True;True;True;True;True;True;True;True;True;True	71;238;314;424;461;516;951;956;1022;1047	127;128;415;416;536;537;710;773;774;872;1661;1662;1669;1670;1774;1775;1829;1830	302;303;862;863;864;865;866;867;1071;1072;1073;1354;1355;1467;1468;1469;1704;3266;3267;3275;3276;3489;3490;3703;3704;3705	303;862;1073;1354;1468;1704;3266;3275;3490;3703
sp|Q9I4W3|DAPA_PSEAE	sp|Q9I4W3|DAPA_PSEAE	1	1	1	>sp|Q9I4W3|DAPA_PSEAE 4-hydroxy-tetrahydrodipicolinate synthase OS=Pseudomonas aeruginosa (strain ATCC 15692 / PAO1 / 1C / PRS 101 / LMG 12228) GN=dapA PE=1 SV=1	1	1	1	1	4.5	4.5	4.5	31.449	292	292	0	7.0943	1384700	1				152	450	TRUE	467	791	1556	1556
sp|Q9I4Z4|PAL_PSEAE	sp|Q9I4Z4|PAL_PSEAE	2	2	2	>sp|Q9I4Z4|PAL_PSEAE Peptidoglycan-associated lipoprotein OS=Pseudomonas aeruginosa (strain ATCC 15692 / PAO1 / 1C / PRS 101 / LMG 12228) GN=pal PE=3 SV=1	1	2	2	2	16.7	16.7	16.7	17.925	168	168	0	20.138	23440000	7				153	262;1016	True;True	277;1046	479;480;1826;1827;1828	989;990;991;3698;3699;3700;3701;3702	990;3698
sp|Q9I558|ACSA1_PSEAE	sp|Q9I558|ACSA1_PSEAE	3	3	3	>sp|Q9I558|ACSA1_PSEAE Acetyl-coenzyme A synthetase 1 OS=Pseudomonas aeruginosa (strain ATCC 15692 / PAO1 / 1C / PRS 101 / LMG 12228) GN=acsA1 PE=3 SV=1	1	3	3	3	6.3	6.3	6.3	71.762	651	651	0	19.097	3282300	3				154	231;938;979	True;True;True	244;965;1009	426;1684;1755	882;3293;3462	882;3293;3462
sp|Q9I576|HPPD_PSEAE	sp|Q9I576|HPPD_PSEAE	1	1	1	>sp|Q9I576|HPPD_PSEAE 4-hydroxyphenylpyruvate dioxygenase OS=Pseudomonas aeruginosa (strain ATCC 15692 / PAO1 / 1C / PRS 101 / LMG 12228) GN=hpd PE=3 SV=1	1	1	1	1	4.2	4.2	4.2	39.912	357	357	0	10.77	1592800	2				155	651	TRUE	674	1166;1167	2370;2371	2370
sp|Q9I5Y1|ALF_PSEAE	sp|Q9I5Y1|ALF_PSEAE	1	1	1	>sp|Q9I5Y1|ALF_PSEAE Fructose-bisphosphate aldolase OS=Pseudomonas aeruginosa (strain ATCC 15692 / PAO1 / 1C / PRS 101 / LMG 12228) GN=fba PE=3 SV=1	1	1	1	1	3.4	3.4	3.4	38.573	354	354	0	7.0469	1386400	1				156	283	TRUE	298	512	1040	1040
sp|Q9I5Y4|PGK_PSEAE	sp|Q9I5Y4|PGK_PSEAE	1	1	1	>sp|Q9I5Y4|PGK_PSEAE Phosphoglycerate kinase OS=Pseudomonas aeruginosa (strain ATCC 15692 / PAO1 / 1C / PRS 101 / LMG 12228) GN=pgk PE=3 SV=1	1	1	1	1	4.4	4.4	4.4	40.404	387	387	0	8.7022	5406100	3				157	863	TRUE	889	1556;1557	3074;3075;3076	3076
sp|Q9I5Z0|METK_PSEAE	sp|Q9I5Z0|METK_PSEAE	5	5	5	>sp|Q9I5Z0|METK_PSEAE S-adenosylmethionine synthase OS=Pseudomonas aeruginosa (strain ATCC 15692 / PAO1 / 1C / PRS 101 / LMG 12228) GN=metK PE=3 SV=1	1	5	5	5	17.4	17.4	17.4	42.709	396	396	0	38.627	21577000	11				158	167;396;432;665;818	True;True;True;True;True	178;411;449;688;844	308;690;691;692;752;1187;1188;1484	637;1329;1330;1331;1332;1430;1431;2398;2399;2979;2980	637;1329;1431;2398;2980
sp|Q9I617|BIOF_PSEAE	sp|Q9I617|BIOF_PSEAE	1	1	1	>sp|Q9I617|BIOF_PSEAE 8-amino-7-oxononanoate synthase OS=Pseudomonas aeruginosa (strain ATCC 15692 / PAO1 / 1C / PRS 101 / LMG 12228) GN=bioF PE=3 SV=1	1	1	1	1	5	5	5	42.237	401	401	0	7.709	1266400	0				159	111	TRUE	118	208	470	470
sp|Q9I636|MASZ_PSEAE	sp|Q9I636|MASZ_PSEAE	2	2	2	>sp|Q9I636|MASZ_PSEAE Malate synthase G OS=Pseudomonas aeruginosa (strain ATCC 15692 / PAO1 / 1C / PRS 101 / LMG 12228) GN=glcB PE=3 SV=1	1	2	2	2	4.1	4.1	4.1	78.659	725	725	0	11.737	3922100	1				160	646;883	True;True	669;909	1148;1596	2222;3152	2222;3152
sp|Q9I685|SAHH_PSEAE	sp|Q9I685|SAHH_PSEAE	11	11	11	>sp|Q9I685|SAHH_PSEAE Adenosylhomocysteinase OS=Pseudomonas aeruginosa (strain ATCC 15692 / PAO1 / 1C / PRS 101 / LMG 12228) GN=ahcY PE=3 SV=1	1	11	11	11	30.9	30.9	30.9	51.399	469	469	0	79.758	86525000	28				161	166;327;427;480;580;599;659;733;866;944;999	True;True;True;True;True;True;True;True;True;True;True	177;342;444;497;598;617;682;757;892;973;1029	306;307;574;575;742;743;838;1024;1056;1057;1177;1178;1305;1306;1560;1698;1699;1786;1787	635;636;1127;1128;1129;1130;1415;1416;1639;1995;2066;2067;2385;2386;2611;2612;2613;2614;3081;3356;3357;3358;3359;3360;3361;3362;3507;3508	635;1128;1415;1639;1995;2066;2385;2613;3081;3357;3507
sp|Q9I6M4|DAVT_PSEAE	sp|Q9I6M4|DAVT_PSEAE	8	8	8	>sp|Q9I6M4|DAVT_PSEAE 5-aminovalerate aminotransferase DavT OS=Pseudomonas aeruginosa (strain ATCC 15692 / PAO1 / 1C / PRS 101 / LMG 12228) GN=davT PE=1 SV=1	1	8	8	8	25.8	25.8	25.8	45.22	426	426	0	57.381	29395000	12				162	36;287;375;787;817;829;833;911	True;True;True;True;True;True;True;True	38;302;390;813;843;855;859;938	70;518;519;655;656;1436;1482;1483;1504;1510;1638	173;1051;1052;1267;1268;2863;2975;2976;2977;2978;3002;3014;3217	173;1051;1267;2863;2975;3002;3014;3217
sp|Q9I6M5|DAVD_PSEAE	sp|Q9I6M5|DAVD_PSEAE	4	4	4	>sp|Q9I6M5|DAVD_PSEAE Glutarate-semialdehyde dehydrogenase DavD OS=Pseudomonas aeruginosa (strain ATCC 15692 / PAO1 / 1C / PRS 101 / LMG 12228) GN=davD PE=1 SV=1	1	4	4	4	14.5	14.5	14.5	51.622	483	483	0	45.851	17560000	7				163	374;565;884;939	True;True;True;True	389;583;910;966	654;995;996;1597;1685;1686	1266;1943;1944;3153;3294;3295;3296	1266;1943;3153;3294
sp|Q9I742|CLPV1_PSEAE	sp|Q9I742|CLPV1_PSEAE	5	5	5	>sp|Q9I742|CLPV1_PSEAE Protein ClpV1 OS=Pseudomonas aeruginosa (strain ATCC 15692 / PAO1 / 1C / PRS 101 / LMG 12228) GN=clpV1 PE=1 SV=1	1	5	5	5	7.9	7.9	7.9	98.737	902	902	0	31.364	13142000	7				164	0;252;601;618;644	True;True;True;True;True	0;267;619;637;667	0;464;1059;1060;1087;1145	0;1;955;2069;2070;2112;2219	0;955;2070;2112;2219
sp|Q9I747|HCP1_PSEAE	sp|Q9I747|HCP1_PSEAE	2	2	2	>sp|Q9I747|HCP1_PSEAE Protein hcp1 OS=Pseudomonas aeruginosa (strain ATCC 15692 / PAO1 / 1C / PRS 101 / LMG 12228) GN=hcp1 PE=1 SV=1	1	2	2	2	16.7	16.7	16.7	17.414	162	162	0	14.185	22879000	6				165	258;943	True;True	273;972	472;473;1696;1697	972;973;974;3353;3354;3355	973;3355
sp|Q9I7B8|SYGB_PSEAE	sp|Q9I7B8|SYGB_PSEAE	2	2	2	>sp|Q9I7B8|SYGB_PSEAE Glycine--tRNA ligase beta subunit OS=Pseudomonas aeruginosa (strain ATCC 15692 / PAO1 / 1C / PRS 101 / LMG 12228) GN=glyS PE=3 SV=1	1	2	2	2	3.9	3.9	3.9	73.973	684	684	0	13.083	3414700	2				166	86;455	True;True	91;472	159;797	353;1565	353;1565
sp|Q9I7C2|GYRB_PSEAE	sp|Q9I7C2|GYRB_PSEAE	2	2	2	>sp|Q9I7C2|GYRB_PSEAE DNA gyrase subunit B OS=Pseudomonas aeruginosa (strain ATCC 15692 / PAO1 / 1C / PRS 101 / LMG 12228) GN=gyrB PE=3 SV=1	1	2	2	2	4.1	4.1	4.1	90.188	806	806	0	16.466	1011100	3				167	741;791	True;True	766;817	1322;1442	2646;2872;2873	2646;2873
sp|Q9LCT3|SECA_PSEAE	sp|Q9LCT3|SECA_PSEAE	3	3	3	>sp|Q9LCT3|SECA_PSEAE Protein translocase subunit SecA OS=Pseudomonas aeruginosa (strain ATCC 15692 / PAO1 / 1C / PRS 101 / LMG 12228) GN=secA PE=3 SV=1	1	3	3	3	5.9	5.9	5.9	103.85	916	916	0	16.97	6551300	5				168	226;324;832	True;True;True	239;339;858	417;569;1508;1509	868;1121;3011;3012;3013	868;1121;3012
sp|Q9S508|PHZB2_PSEAE	sp|Q9S508|PHZB2_PSEAE	2	2	1	>sp|Q9S508|PHZB2_PSEAE Phenazine biosynthesis protein PhzB 2 OS=Pseudomonas aeruginosa (strain ATCC 15692 / PAO1 / 1C / PRS 101 / LMG 12228) GN=phzB2 PE=1 SV=1	1	2	2	1	16.7	16.7	10.5	19.027	162	162	0	14.036	25292000	9				169	89;622	True;True	94;641	164;165;1092;1093	364;365;366;367;368;369;2118;2119;2120	365;2118
sp|Q9X2T1|THIO_PSEAE	sp|Q9X2T1|THIO_PSEAE	1	1	1	>sp|Q9X2T1|THIO_PSEAE Thioredoxin OS=Pseudomonas aeruginosa (strain ATCC 15692 / PAO1 / 1C / PRS 101 / LMG 12228) GN=trxA PE=3 SV=1	1	1	1	1	11.1	11.1	11.1	11.87	108	108	0	7.4201	6423800	3				170	564	TRUE	582	993;994	1940;1941;1942	1940
tr|G3XCT6|G3XCT6_PSEAE	tr|G3XCT6|G3XCT6_PSEAE	2	2	2	>tr|G3XCT6|G3XCT6_PSEAE Probable two-component sensor OS=Pseudomonas aeruginosa (strain ATCC 15692 / PAO1 / 1C / PRS 101 / LMG 12228) GN=PA1458 PE=4 SV=1	1	2	2	2	5	5	5	79.737	753	753	0	11.034	1739600	2				171	97;653	True;True	104;676	181;1169	425;2374	425;2374
tr|G3XD72|G3XD72_PSEAE	tr|G3XD72|G3XD72_PSEAE	1	1	1	>tr|G3XD72|G3XD72_PSEAE Probable purine-binding chemotaxis protein OS=Pseudomonas aeruginosa (strain ATCC 15692 / PAO1 / 1C / PRS 101 / LMG 12228) GN=PA1464 PE=4 SV=1	1	1	1	1	10.7	10.7	10.7	17.536	159	159	0.0045045	6.3906	649340	2				172	125	TRUE	133	230	498;499	498
tr|Q9HTD1|Q9HTD1_PSEAE	tr|Q9HTD1|Q9HTD1_PSEAE	20	20	20	>tr|Q9HTD1|Q9HTD1_PSEAE Probable transcarboxylase subunit OS=Pseudomonas aeruginosa (strain ATCC 15692 / PAO1 / 1C / PRS 101 / LMG 12228) GN=PA5435 PE=4 SV=1	1	20	20	20	47	47	47	66.095	607	607	0	187.14	462810000	155				173	16;23;92;101;154;188;208;286;369;407;416;485;616;693;737;819;879;940;961;1010	True;True;True;True;True;True;True;True;True;True;True;True;True;True;True;True;True;True;True;True	16;23;98;99;108;164;200;201;221;301;384;422;423;432;433;502;634;635;717;761;762;845;905;967;990;991;1040	25;26;35;36;37;171;172;173;187;188;189;190;286;353;354;355;356;387;388;389;390;517;645;646;647;707;708;709;721;722;723;846;1082;1083;1084;1085;1237;1238;1239;1313;1314;1315;1485;1486;1579;1580;1581;1582;1583;1584;1585;1586;1587;1588;1589;1590;1591;1592;1687;1688;1725;1726;1727;1728;1729;1816;1817	60;61;62;63;64;75;76;77;78;79;80;81;82;377;378;379;380;381;382;383;437;438;439;440;441;442;443;444;445;446;587;743;744;745;746;747;748;749;750;751;752;753;754;755;823;824;825;826;827;828;1050;1249;1250;1251;1252;1253;1254;1255;1350;1351;1352;1353;1380;1381;1382;1383;1384;1385;1386;1387;1388;1389;1647;2099;2100;2101;2102;2103;2104;2105;2106;2107;2108;2109;2110;2507;2508;2509;2510;2624;2625;2626;26…	62;81;377;443;587;747;826;1050;1250;1350;1381;1647;2104;2510;2625;2981;3136;3298;3413;3684	21;22;23;24;25;26;27	125;172;182;239;306;323;435
tr|Q9HTD9|Q9HTD9_PSEAE	tr|Q9HTD9|Q9HTD9_PSEAE	5	5	5	>tr|Q9HTD9|Q9HTD9_PSEAE Alcohol dehydrogenase OS=Pseudomonas aeruginosa (strain ATCC 15692 / PAO1 / 1C / PRS 101 / LMG 12228) GN=adhA PE=1 SV=1	1	5	5	5	18.1	18.1	18.1	35.911	342	342	0	43.048	50956000	23				174	17;25;511;700;948	True;True;True;True;True	17;25;528;724;977	27;28;39;40;41;889;890;1246;1247;1704;1705	65;66;67;85;86;87;88;89;90;91;92;93;94;1728;1729;1730;1731;2517;2518;2519;3369;3370;3371	65;85;1728;2519;3369
tr|Q9HTM0|Q9HTM0_PSEAE	tr|Q9HTM0|Q9HTM0_PSEAE	1	1	1	>tr|Q9HTM0|Q9HTM0_PSEAE Guanosine-3,5-bis(Diphosphate) 3-pyrophosphohydrolase OS=Pseudomonas aeruginosa (strain ATCC 15692 / PAO1 / 1C / PRS 101 / LMG 12228) GN=spoT PE=3 SV=1	1	1	1	1	1.6	1.6	1.6	78.879	701	701	0.0039841	5.8621	1233400	1				175	200	TRUE	213	376	795	795
tr|Q9HTP2|Q9HTP2_PSEAE	tr|Q9HTP2|Q9HTP2_PSEAE	4	4	4	>tr|Q9HTP2|Q9HTP2_PSEAE Probable aldehyde dehydrogenase OS=Pseudomonas aeruginosa (strain ATCC 15692 / PAO1 / 1C / PRS 101 / LMG 12228) GN=PA5312 PE=3 SV=1	1	4	4	4	10.7	10.7	10.7	53.143	497	497	0	25.187	8175000	3				176	289;399;475;772	True;True;True;True	304;414;492;798	521;696;830;1373	1054;1336;1628;2755	1054;1336;1628;2755
tr|Q9HTU9|Q9HTU9_PSEAE	tr|Q9HTU9|Q9HTU9_PSEAE	1	1	1	>tr|Q9HTU9|Q9HTU9_PSEAE Uncharacterized protein OS=Pseudomonas aeruginosa (strain ATCC 15692 / PAO1 / 1C / PRS 101 / LMG 12228) GN=PA5245 PE=4 SV=1	1	1	1	1	4.5	4.5	4.5	23.425	222	222	0.0045455	6.4114	0	1				177	925	TRUE	952	1663	3268	3268
tr|Q9HU11|Q9HU11_PSEAE	tr|Q9HU11|Q9HU11_PSEAE	2	2	2	>tr|Q9HU11|Q9HU11_PSEAE Uncharacterized protein OS=Pseudomonas aeruginosa (strain ATCC 15692 / PAO1 / 1C / PRS 101 / LMG 12228) GN=PA5178 PE=4 SV=1	1	2	2	2	16.6	16.6	16.6	15.46	145	145	0	11.966	876590	3				178	461;912	True;True	478;939	809;1639;1640	1596;3218;3219	1596;3219
tr|Q9HU23|Q9HU23_PSEAE	tr|Q9HU23|Q9HU23_PSEAE	1	1	1	>tr|Q9HU23|Q9HU23_PSEAE dTDP-4-dehydrorhamnose reductase OS=Pseudomonas aeruginosa (strain ATCC 15692 / PAO1 / 1C / PRS 101 / LMG 12228) GN=rmlD PE=4 SV=1	1	1	1	1	8.3	8.3	8.3	33.106	302	302	0	8.3136	952410	1				179	973	TRUE	1003	1746	3447	3447
tr|Q9HUD3|Q9HUD3_PSEAE	tr|Q9HUD3|Q9HUD3_PSEAE	3	3	3	>tr|Q9HUD3|Q9HUD3_PSEAE Malic enzyme OS=Pseudomonas aeruginosa (strain ATCC 15692 / PAO1 / 1C / PRS 101 / LMG 12228) GN=PA5046 PE=4 SV=1	1	3	3	3	10.2	10.2	10.2	45.428	422	422	0	21.137	8498600	4				180	7;541;736	True;True;True	7;558;760	10;950;951;1312	15;1881;1882;2623	15;1881;2623
tr|Q9HUM7|Q9HUM7_PSEAE	tr|Q9HUM7|Q9HUM7_PSEAE	2	2	2	>tr|Q9HUM7|Q9HUM7_PSEAE Ribonuclease R OS=Pseudomonas aeruginosa (strain ATCC 15692 / PAO1 / 1C / PRS 101 / LMG 12228) GN=rnr PE=3 SV=1	1	2	2	2	4.6	4.6	4.6	100.15	904	904	0	11.064	928630	2				181	954;967	True;True	983;997	1713;1738	3381;3382;3436	3382;3436
tr|Q9HV54|Q9HV54_PSEAE	tr|Q9HV54|Q9HV54_PSEAE	2	2	2	>tr|Q9HV54|Q9HV54_PSEAE Transcription termination/antitermination protein NusA OS=Pseudomonas aeruginosa (strain ATCC 15692 / PAO1 / 1C / PRS 101 / LMG 12228) GN=nusA PE=3 SV=1	1	2	2	2	7.7	7.7	7.7	54.658	493	493	0	19.182	5244800	6				182	192;214	True;True	205;227	361;362;400;401	761;762;763;845;846;847	763;846
tr|Q9HV96|Q9HV96_PSEAE	tr|Q9HV96|Q9HV96_PSEAE	1	1	1	>tr|Q9HV96|Q9HV96_PSEAE Uncharacterized protein OS=Pseudomonas aeruginosa (strain ATCC 15692 / PAO1 / 1C / PRS 101 / LMG 12228) GN=PA4701 PE=4 SV=1	1	1	1	1	2.3	2.3	2.3	58.376	520	520	0.007722	5.7324	936190	1				183	248	TRUE	263	459	950	950
tr|Q9HVF9|Q9HVF9_PSEAE	tr|Q9HVF9|Q9HVF9_PSEAE	2	2	2	>tr|Q9HVF9|Q9HVF9_PSEAE Uncharacterized protein OS=Pseudomonas aeruginosa (strain ATCC 15692 / PAO1 / 1C / PRS 101 / LMG 12228) GN=PA4632 PE=3 SV=1	1	2	2	2	12.1	12.1	12.1	29.159	273	273	0	14.21	2272000	4				184	117;729	True;True	125;753	218;1297;1298	484;2602;2603;2604	484;2602
tr|Q9HVJ1|Q9HVJ1_PSEAE	tr|Q9HVJ1|Q9HVJ1_PSEAE	4	4	4	>tr|Q9HVJ1|Q9HVJ1_PSEAE Probable ATP-binding component of ABC transporter OS=Pseudomonas aeruginosa (strain ATCC 15692 / PAO1 / 1C / PRS 101 / LMG 12228) GN=PA4595 PE=4 SV=1	1	4	4	4	9	9	9	61.32	554	554	0	27.549	15755000	7				185	172;273;688;743	True;True;True;True	183;288;712;768	316;317;496;497;1230;1325	655;656;1018;1019;2494;2654;2655;2656	656;1018;2494;2654
tr|Q9HVS8|Q9HVS8_PSEAE	tr|Q9HVS8|Q9HVS8_PSEAE	1	1	1	>tr|Q9HVS8|Q9HVS8_PSEAE RoxR OS=Pseudomonas aeruginosa (strain ATCC 15692 / PAO1 / 1C / PRS 101 / LMG 12228) GN=roxR PE=4 SV=1	1	1	1	1	7.5	7.5	7.5	20.616	186	186	0.0040816	5.9378	1212800	2				186	921	TRUE	948	1654;1655	3237;3238	3237
tr|Q9HVU0|Q9HVU0_PSEAE	tr|Q9HVU0|Q9HVU0_PSEAE	3	3	3	>tr|Q9HVU0|Q9HVU0_PSEAE Rod shape-determining protein MreB OS=Pseudomonas aeruginosa (strain ATCC 15692 / PAO1 / 1C / PRS 101 / LMG 12228) GN=mreB PE=4 SV=1	1	3	3	3	11	11	11	36.976	345	345	0	19.361	7907200	2				187	347;666;730	True;True;True	362;689;754	610;611;1189;1299	1198;1199;2400;2605	1199;2400;2605
tr|Q9HVY4|Q9HVY4_PSEAE	tr|Q9HVY4|Q9HVY4_PSEAE	3	3	3	>tr|Q9HVY4|Q9HVY4_PSEAE Ubiquinol-cytochrome c reductase iron-sulfur subunit OS=Pseudomonas aeruginosa (strain ATCC 15692 / PAO1 / 1C / PRS 101 / LMG 12228) GN=PA4431 PE=4 SV=1	1	3	3	3	17.8	17.8	17.8	20.828	197	197	0	17.284	3402100	3				188	2;114;406	True;True;True	2;122;421	2;214;706	3;479;1349	3;479;1349
tr|Q9HVY6|Q9HVY6_PSEAE	tr|Q9HVY6|Q9HVY6_PSEAE	2	2	2	>tr|Q9HVY6|Q9HVY6_PSEAE Probable cytochrome c1 OS=Pseudomonas aeruginosa (strain ATCC 15692 / PAO1 / 1C / PRS 101 / LMG 12228) GN=PA4429 PE=4 SV=1	1	2	2	2	10.4	10.4	10.4	28.993	260	260	0	12.065	0	2				189	812;860	True;True	838;886	1477;1551	2970;3067	2970;3067
tr|Q9HW15|Q9HW15_PSEAE	tr|Q9HW15|Q9HW15_PSEAE	2	2	2	>tr|Q9HW15|Q9HW15_PSEAE Probable short-chain dehydrogenase OS=Pseudomonas aeruginosa (strain ATCC 15692 / PAO1 / 1C / PRS 101 / LMG 12228) GN=speA PE=4 SV=1	1	2	2	2	7.9	7.9	7.9	26.72	252	252	0	11.326	3294500	1				190	54;500	True;True	57;517	102;873	233;1705	233;1705
tr|Q9HW49|Q9HW49_PSEAE	tr|Q9HW49|Q9HW49_PSEAE	7	7	7	>tr|Q9HW49|Q9HW49_PSEAE Uncharacterized protein OS=Pseudomonas aeruginosa (strain ATCC 15692 / PAO1 / 1C / PRS 101 / LMG 12228) GN=PA4352 PE=3 SV=1	1	7	7	7	41.3	41.3	41.3	30.972	286	286	0	52.568	31185000	16				191	144;204;496;643;694;886;901	True;True;True;True;True;True;True	154;217;513;666;718;912;928	269;382;865;866;1142;1143;1144;1240;1599;1600;1624;1625	562;816;817;1691;1692;2215;2216;2217;2218;2511;3155;3156;3187;3188;3189;3190	562;817;1691;2215;2511;3155;3187
tr|Q9HW68|Q9HW68_PSEAE	tr|Q9HW68|Q9HW68_PSEAE	2	2	2	>tr|Q9HW68|Q9HW68_PSEAE Probable fumarase OS=Pseudomonas aeruginosa (strain ATCC 15692 / PAO1 / 1C / PRS 101 / LMG 12228) GN=PA4333 PE=4 SV=1	1	2	2	2	7.3	7.3	7.3	54.763	507	507	0	16.568	2770100	4				192	608;942	True;True	626;971	1069;1695	2081;2082;2083;3352	2083;3352
tr|Q9HW72|Q9HW72_PSEAE	tr|Q9HW72|Q9HW72_PSEAE	4	4	4	>tr|Q9HW72|Q9HW72_PSEAE Pyruvate kinase OS=Pseudomonas aeruginosa (strain ATCC 15692 / PAO1 / 1C / PRS 101 / LMG 12228) GN=pykA PE=3 SV=1	1	4	4	4	17.4	17.4	17.4	52.252	483	483	0	23.091	6333100	7				193	40;465;777;966	True;True;True;True	43;482;803;996	78;79;815;816;1380;1736;1737	183;184;185;1606;1607;1608;1609;2766;3434;3435	184;1607;2766;3435
tr|Q9HWP8|Q9HWP8_PSEAE	tr|Q9HWP8|Q9HWP8_PSEAE	1	1	1	>tr|Q9HWP8|Q9HWP8_PSEAE Cytochrome c oxidase subunit (Cbb3-type) OS=Pseudomonas aeruginosa (strain ATCC 15692 / PAO1 / 1C / PRS 101 / LMG 12228) GN=PA4133 PE=3 SV=1	1	1	1	1	2.5	2.5	2.5	53.318	475	475	0.004386	6.2267	1588600	1				194	695	TRUE	719	1241	2512	2512
tr|Q9HWQ0|Q9HWQ0_PSEAE	tr|Q9HWQ0|Q9HWQ0_PSEAE	4	4	4	>tr|Q9HWQ0|Q9HWQ0_PSEAE Probable iron-sulfur protein OS=Pseudomonas aeruginosa (strain ATCC 15692 / PAO1 / 1C / PRS 101 / LMG 12228) GN=PA4131 PE=4 SV=1	1	4	4	4	10.8	10.8	10.8	63.991	573	573	0	32.633	21846000	7				195	245;342;446;572	True;True;True;True	260;357;463;590	454;599;786;787;1009;1010	942;1169;1170;1550;1551;1967;1968	942;1169;1551;1968
tr|Q9HWW7|Q9HWW7_PSEAE	tr|Q9HWW7|Q9HWW7_PSEAE	1	1	1	>tr|Q9HWW7|Q9HWW7_PSEAE Probable thioredoxin OS=Pseudomonas aeruginosa (strain ATCC 15692 / PAO1 / 1C / PRS 101 / LMG 12228) GN=PA4061 PE=4 SV=1	1	1	1	1	7.3	7.3	7.3	31.878	289	289	0	7.4688	696700	1				196	99	TRUE	106	184	431	431
tr|Q9HX05|Q9HX05_PSEAE;tr|Q9I2C4|Q9I2C4_PSEAE	tr|Q9HX05|Q9HX05_PSEAE;tr|Q9I2C4|Q9I2C4_PSEAE	4;3	4;3	4;3	>tr|Q9HX05|Q9HX05_PSEAE Probable aldehyde dehydrogenase OS=Pseudomonas aeruginosa (strain ATCC 15692 / PAO1 / 1C / PRS 101 / LMG 12228) GN=PA4022 PE=3 SV=1;>tr|Q9I2C4|Q9I2C4_PSEAE NAD+ dependent aldehyde dehydrogenase ExaC OS=Pseudomonas aeruginosa (strain	2	4	4	4	14	14	14	54.979	506	506;506	0	31.112	18941000	10				197	90;439;517;1002	True;True;True;True	95;456;534;1032	166;167;764;765;898;899;1792	370;371;1446;1447;1448;1449;1740;1741;1742;1743;3519	371;1446;1740;3519
tr|Q9HXM5|Q9HXM5_PSEAE	tr|Q9HXM5|Q9HXM5_PSEAE	3	3	3	>tr|Q9HXM5|Q9HXM5_PSEAE Inosine-5-monophosphate dehydrogenase OS=Pseudomonas aeruginosa (strain ATCC 15692 / PAO1 / 1C / PRS 101 / LMG 12228) GN=guaB PE=1 SV=1	1	3	3	3	7	7	7	51.707	489	489	0	16.978	1523000	4				198	600;893;1007	True;True;True	618;920;1037	1058;1612;1811;1812	2068;3174;3674;3675	2068;3174;3674
tr|Q9HXW4|Q9HXW4_PSEAE	tr|Q9HXW4|Q9HXW4_PSEAE	1	1	1	>tr|Q9HXW4|Q9HXW4_PSEAE Probable Resistance-Nodulation-Cell Division (RND) efflux transporter OS=Pseudomonas aeruginosa (strain ATCC 15692 / PAO1 / 1C / PRS 101 / LMG 12228) GN=PA3676 PE=3 SV=1	1	1	1	1	1	1	1	113.28	1025	1025	0.007874	5.8058	860960	1				199	481	TRUE	498	839	1640	1640	28	74
tr|Q9HY13|Q9HY13_PSEAE	tr|Q9HY13|Q9HY13_PSEAE	5	5	5	>tr|Q9HY13|Q9HY13_PSEAE Uncharacterized protein OS=Pseudomonas aeruginosa (strain ATCC 15692 / PAO1 / 1C / PRS 101 / LMG 12228) GN=PA3613 PE=4 SV=1	1	5	5	5	7.5	7.5	7.5	88.378	801	801	0	33.614	6917800	10				200	147;490;800;904;964	True;True;True;True;True	157;507;826;931;994	274;275;854;1459;1628;1629;1733	569;570;571;1670;2931;2932;3194;3195;3196;3431	569;1670;2931;3194;3431
tr|Q9HY77|Q9HY77_PSEAE	tr|Q9HY77|Q9HY77_PSEAE	3	3	3	>tr|Q9HY77|Q9HY77_PSEAE Glutaredoxin OS=Pseudomonas aeruginosa (strain ATCC 15692 / PAO1 / 1C / PRS 101 / LMG 12228) GN=PA3533 PE=3 SV=1	1	3	3	3	31.5	31.5	31.5	11.843	108	108	0	19.56	1758600	3				201	251;269;321	True;True;True	266;284;336	463;491;565	954;1011;1117	954;1011;1117
tr|Q9HY79|Q9HY79_PSEAE	tr|Q9HY79|Q9HY79_PSEAE	1	1	1	>tr|Q9HY79|Q9HY79_PSEAE Ferroxidase OS=Pseudomonas aeruginosa (strain ATCC 15692 / PAO1 / 1C / PRS 101 / LMG 12228) GN=bfrB PE=1 SV=1	1	1	1	1	9.5	9.5	9.5	18.553	158	158	0	6.973	4366800	1				202	437	TRUE	454	761	1442	1442
tr|Q9HY81|Q9HY81_PSEAE	tr|Q9HY81|Q9HY81_PSEAE	5	5	5	>tr|Q9HY81|Q9HY81_PSEAE Probable peroxidase OS=Pseudomonas aeruginosa (strain ATCC 15692 / PAO1 / 1C / PRS 101 / LMG 12228) GN=PA3529 PE=1 SV=1	1	5	5	5	24.5	24.5	24.5	21.822	200	200	0	36.379	41925000	13				203	150;359;447;670;773	True;True;True;True;True	160;374;464;693;799	279;280;631;788;1198;1374;1375	577;578;579;580;1226;1552;2419;2756;2757;2758;2759;2760;2761	577;1226;1552;2419;2757
tr|Q9HYR5|Q9HYR5_PSEAE	tr|Q9HYR5|Q9HYR5_PSEAE	1	1	1	>tr|Q9HYR5|Q9HYR5_PSEAE Probable short chain dehydrogenase OS=Pseudomonas aeruginosa (strain ATCC 15692 / PAO1 / 1C / PRS 101 / LMG 12228) GN=PA3330 PE=4 SV=1	1	1	1	1	3.3	3.3	3.3	32.031	304	304	0.0044843	6.3881	176130	3				204	290	TRUE	305	522	1055;1056;1057	1055
tr|Q9HYR6|Q9HYR6_PSEAE	tr|Q9HYR6|Q9HYR6_PSEAE	2	2	2	>tr|Q9HYR6|Q9HYR6_PSEAE Uncharacterized protein OS=Pseudomonas aeruginosa (strain ATCC 15692 / PAO1 / 1C / PRS 101 / LMG 12228) GN=PA3329 PE=4 SV=1	1	2	2	2	5.9	5.9	5.9	49.134	442	442	0	15.477	4878000	3				205	236;492	True;True	249;509	435;856;857	901;1672;1673	901;1672
tr|Q9HYR7|Q9HYR7_PSEAE	tr|Q9HYR7|Q9HYR7_PSEAE	2	2	2	>tr|Q9HYR7|Q9HYR7_PSEAE Probable FAD-dependent monooxygenase OS=Pseudomonas aeruginosa (strain ATCC 15692 / PAO1 / 1C / PRS 101 / LMG 12228) GN=PA3328 PE=4 SV=1	1	2	2	2	7.7	7.7	7.7	42.498	388	388	0	12.418	5573700	4				206	121;138	True;True	129;148	224;258;259	491;549;550;551	491;551
tr|Q9HYR8|Q9HYR8_PSEAE	tr|Q9HYR8|Q9HYR8_PSEAE	4	4	4	>tr|Q9HYR8|Q9HYR8_PSEAE Probable non-ribosomal peptide synthetase OS=Pseudomonas aeruginosa (strain ATCC 15692 / PAO1 / 1C / PRS 101 / LMG 12228) GN=PA3327 PE=4 SV=1	1	4	4	4	2.7	2.7	2.7	259.4	2352	2352	0	23.614	5550400	7				207	152;801;955;1009	True;True;True;True	162;827;984;1039	283;284;1460;1461;1714;1815	583;584;585;2933;2934;3383;3682	585;2934;3383;3682
tr|Q9HYT5|Q9HYT5_PSEAE	tr|Q9HYT5|Q9HYT5_PSEAE	6	6	6	>tr|Q9HYT5|Q9HYT5_PSEAE Uncharacterized protein OS=Pseudomonas aeruginosa (strain ATCC 15692 / PAO1 / 1C / PRS 101 / LMG 12228) GN=PA3309 PE=3 SV=1	1	6	6	6	53	53	53	16.496	151	151	0	67.87	68052000	27				208	393;412;440;557;874;918	True;True;True;True;True;True	408;428;457;574;575;900;945	684;685;715;766;767;976;977;978;979;980;1571;1647;1648;1649;1650;1651	1322;1323;1361;1362;1450;1451;1452;1453;1454;1455;1456;1915;1916;1917;1918;1919;1920;1921;1922;1923;1924;3098;3099;3227;3228;3229;3230;3231	1323;1361;1450;1920;3099;3230	29	129
tr|Q9HYZ6|Q9HYZ6_PSEAE	tr|Q9HYZ6|Q9HYZ6_PSEAE	4	4	4	>tr|Q9HYZ6|Q9HYZ6_PSEAE Site-determining protein OS=Pseudomonas aeruginosa (strain ATCC 15692 / PAO1 / 1C / PRS 101 / LMG 12228) GN=minD PE=3 SV=1	1	4	4	4	23.6	23.6	23.6	29.635	271	271	0	28.007	16740000	6				209	322;550;855;986	True;True;True;True	337;567;881;1016	566;567;965;966;1542;1543;1765	1118;1119;1902;1903;3057;3058;3474;3475	1119;1902;3058;3474
tr|Q9HZK4|Q9HZK4_PSEAE	tr|Q9HZK4|Q9HZK4_PSEAE	9	9	9	>tr|Q9HZK4|Q9HZK4_PSEAE Glyceraldehyde-3-phosphate dehydrogenase OS=Pseudomonas aeruginosa (strain ATCC 15692 / PAO1 / 1C / PRS 101 / LMG 12228) GN=PA3001 PE=3 SV=1	1	9	9	9	25.2	25.2	25.2	50.111	461	461	0	63.293	55158000	15				210	32;153;217;523;606;673;731;935;950	True;True;True;True;True;True;True;True;True	34;163;230;540;624;696;755;962;979	63;64;285;405;406;908;909;1066;1203;1300;1301;1302;1679;1680;1708	164;165;586;851;852;1756;1757;2078;2430;2606;2607;2608;3285;3286;3376	164;586;851;1756;2078;2430;2607;3285;3376
tr|Q9I028|Q9I028_PSEAE	tr|Q9I028|Q9I028_PSEAE	1	1	1	>tr|Q9I028|Q9I028_PSEAE Probable acyl-CoA dehydrogenase OS=Pseudomonas aeruginosa (strain ATCC 15692 / PAO1 / 1C / PRS 101 / LMG 12228) GN=PA2815 PE=4 SV=1	1	1	1	1	4.2	4.2	4.2	88.762	815	815	0.0042918	6.1702	11049000	3				211	959	TRUE	988	1721;1722	3403;3404;3405	3403
tr|Q9I0F9|Q9I0F9_PSEAE	tr|Q9I0F9|Q9I0F9_PSEAE	1	1	1	>tr|Q9I0F9|Q9I0F9_PSEAE Uncharacterized protein OS=Pseudomonas aeruginosa (strain ATCC 15692 / PAO1 / 1C / PRS 101 / LMG 12228) GN=PA2679 PE=4 SV=1	1	1	1	1	5.2	5.2	5.2	27.641	250	250	0.0043478	6.1862	264610	1				212	978	TRUE	1008	1754	3461	3461
tr|Q9I0L4|Q9I0L4_PSEAE	tr|Q9I0L4|Q9I0L4_PSEAE	11	11	11	>tr|Q9I0L4|Q9I0L4_PSEAE Isocitrate dehydrogenase OS=Pseudomonas aeruginosa (strain ATCC 15692 / PAO1 / 1C / PRS 101 / LMG 12228) GN=idh PE=4 SV=1	1	11	11	11	22.4	22.4	22.4	81.633	741	741	0	77.253	59389000	30				213	141;203;304;331;438;463;510;571;625;936;981	True;True;True;True;True;True;True;True;True;True;True	151;216;319;346;455;480;527;589;644;963;1011	263;264;380;381;542;543;581;762;763;811;812;887;888;1007;1008;1098;1681;1757	556;557;806;807;808;809;810;811;812;813;814;815;1079;1080;1139;1443;1444;1445;1598;1599;1600;1725;1726;1727;1965;1966;2126;3287;3464;3465	557;807;1080;1139;1444;1598;1725;1965;2126;3287;3464
tr|Q9I0L5|Q9I0L5_PSEAE	tr|Q9I0L5|Q9I0L5_PSEAE	15	15	15	>tr|Q9I0L5|Q9I0L5_PSEAE Isocitrate dehydrogenase [NADP] OS=Pseudomonas aeruginosa (strain ATCC 15692 / PAO1 / 1C / PRS 101 / LMG 12228) GN=icd PE=3 SV=1	1	15	15	15	42.6	42.6	42.6	45.577	418	418	0	146.24	256690000	112				214	88;130;163;201;205;246;362;402;462;477;482;676;859;941;993	True;True;True;True;True;True;True;True;True;True;True;True;True;True;True	93;138;173;174;214;218;261;377;417;479;494;499;699;700;885;968;969;970;1023	162;163;242;243;300;301;302;377;378;383;455;456;636;637;700;810;832;833;840;841;1206;1207;1208;1209;1210;1211;1212;1213;1550;1689;1690;1691;1692;1693;1694;1776;1777	360;361;362;363;515;516;517;518;519;520;521;619;620;621;622;623;624;625;626;627;628;629;796;797;798;799;800;801;802;803;804;818;943;944;1235;1236;1237;1238;1343;1597;1631;1632;1641;1642;2433;2434;2435;2436;2437;2438;2439;2440;2441;2442;2443;2444;2445;2446;2447;2448;2449;2450;2451;2452;2453;2454;2455;2456;2457;2458;2459;2460;2461;2462;3065;3066;3320;3321;3322;3323;3324;3325;3326;3327;3328;3329;333…	361;515;619;802;818;943;1237;1343;1597;1631;1642;2440;3066;3322;3492	30;31;32;33	47;266;364;365
tr|Q9I0T1|Q9I0T1_PSEAE	tr|Q9I0T1|Q9I0T1_PSEAE	10	10	10	>tr|Q9I0T1|Q9I0T1_PSEAE Probable acyl-CoA thiolase OS=Pseudomonas aeruginosa (strain ATCC 15692 / PAO1 / 1C / PRS 101 / LMG 12228) GN=PA2553 PE=3 SV=1	1	10	10	10	35.6	35.6	35.6	41.4	396	396	0	68.932	43765000	16				215	199;213;224;295;339;349;473;592;697;839	True;True;True;True;True;True;True;True;True;True	212;226;237;310;354;364;490;610;721;865	374;375;398;399;414;530;594;595;614;826;1042;1243;1517;1518	792;793;794;842;843;844;861;1065;1160;1161;1205;1621;1622;2025;2514;3021;3022	793;843;861;1065;1161;1205;1621;2025;2514;3022
tr|Q9I124|Q9I124_PSEAE	tr|Q9I124|Q9I124_PSEAE	1	1	1	>tr|Q9I124|Q9I124_PSEAE Uncharacterized protein OS=Pseudomonas aeruginosa (strain ATCC 15692 / PAO1 / 1C / PRS 101 / LMG 12228) GN=PA2458 PE=4 SV=1	1	1	1	1	2.9	2.9	2.9	41.261	373	373	0.004	5.8704	5300100	2				216	591	TRUE	609	1041	2023;2024	2023
tr|Q9I140|Q9I140_PSEAE	tr|Q9I140|Q9I140_PSEAE	1	1	1	>tr|Q9I140|Q9I140_PSEAE Aminomethyltransferase OS=Pseudomonas aeruginosa (strain ATCC 15692 / PAO1 / 1C / PRS 101 / LMG 12228) GN=gcvT2 PE=3 SV=1	1	1	1	1	3.2	3.2	3.2	39.882	373	373	0.0040984	5.938	268460	0				217	415	TRUE	431	720	1379	1379
tr|Q9I1E8|Q9I1E8_PSEAE	tr|Q9I1E8|Q9I1E8_PSEAE	1	1	1	>tr|Q9I1E8|Q9I1E8_PSEAE Uncharacterized protein OS=Pseudomonas aeruginosa (strain ATCC 15692 / PAO1 / 1C / PRS 101 / LMG 12228) GN=PA2330 PE=4 SV=1	1	1	1	1	5.9	5.9	5.9	37.68	355	355	0.0042017	6.0775	917120	1				218	420	TRUE	437	732	1402	1402
tr|Q9I1H3|Q9I1H3_PSEAE	tr|Q9I1H3|Q9I1H3_PSEAE	5	5	5	>tr|Q9I1H3|Q9I1H3_PSEAE AmbE OS=Pseudomonas aeruginosa (strain ATCC 15692 / PAO1 / 1C / PRS 101 / LMG 12228) GN=ambE PE=4 SV=1	1	5	5	5	3.5	3.5	3.5	229.04	2124	2124	0	32.334	7903400	6				219	1;260;552;880;888	True;True;True;True;True	1;275;569;906;914	1;476;969;970;1593;1603	2;977;978;1906;1907;3149;3159;3160	2;978;1907;3149;3160
tr|Q9I1H5|Q9I1H5_PSEAE	tr|Q9I1H5|Q9I1H5_PSEAE	2	2	2	>tr|Q9I1H5|Q9I1H5_PSEAE Chitinase OS=Pseudomonas aeruginosa (strain ATCC 15692 / PAO1 / 1C / PRS 101 / LMG 12228) GN=chiC PE=3 SV=1	1	2	2	2	8.1	8.1	8.1	53.042	483	483	0	12.162	3301400	4				220	497;876	True;True	514;902	867;1574	1693;1694;1695;3130	1694;3130
tr|Q9I1N7|Q9I1N7_PSEAE	tr|Q9I1N7|Q9I1N7_PSEAE	2	2	2	>tr|Q9I1N7|Q9I1N7_PSEAE PslB OS=Pseudomonas aeruginosa (strain ATCC 15692 / PAO1 / 1C / PRS 101 / LMG 12228) GN=pslB PE=3 SV=1	1	2	2	2	5.5	5.5	5.5	53.515	488	488	0	11.747	1718300	2				221	242;748	True;True	256;773	446;1334	916;2667	916;2667
tr|Q9I1U4|Q9I1U4_PSEAE	tr|Q9I1U4|Q9I1U4_PSEAE	1	1	1	>tr|Q9I1U4|Q9I1U4_PSEAE Uncharacterized protein OS=Pseudomonas aeruginosa (strain ATCC 15692 / PAO1 / 1C / PRS 101 / LMG 12228) GN=PA2171 PE=4 SV=1	1	1	1	1	9	9	9	18.098	156	156	0.0042735	6.1701	19026000	1				222	648	TRUE	671	1161	2363	2363
tr|Q9I1Z6|Q9I1Z6_PSEAE	tr|Q9I1Z6|Q9I1Z6_PSEAE	2	2	2	>tr|Q9I1Z6|Q9I1Z6_PSEAE Alcohol dehydrogenase (Zn-dependent) OS=Pseudomonas aeruginosa (strain ATCC 15692 / PAO1 / 1C / PRS 101 / LMG 12228) GN=PA2119 PE=3 SV=1	1	2	2	2	6.6	6.6	6.6	38.561	366	366	0	12.268	1694100	2				223	512;532	True;True	529;549	891;930	1732;1820	1732;1820
tr|Q9I246|Q9I246_PSEAE	tr|Q9I246|Q9I246_PSEAE	5	5	5	>tr|Q9I246|Q9I246_PSEAE Probable carbamoyl transferase OS=Pseudomonas aeruginosa (strain ATCC 15692 / PAO1 / 1C / PRS 101 / LMG 12228) GN=PA2069 PE=4 SV=1	1	5	5	5	12.4	12.4	12.4	63.382	574	574	0	31.994	13629000	8				224	294;457;554;754;756	True;True;True;True;True	309;474;571;779;781	529;800;801;973;1342;1343;1346	1064;1575;1576;1912;2676;2677;2678;2679;2682	1064;1576;1912;2676;2682
tr|Q9I297|Q9I297_PSEAE	tr|Q9I297|Q9I297_PSEAE	1	1	1	>tr|Q9I297|Q9I297_PSEAE Methylcrotonyl-CoA carboxylase, beta-subunit OS=Pseudomonas aeruginosa (strain ATCC 15692 / PAO1 / 1C / PRS 101 / LMG 12228) GN=liuB PE=1 SV=1	1	1	1	1	2.2	2.2	2.2	57.433	535	535	0.0040323	5.9083	269230	1				225	51	TRUE	54	99	230	230
tr|Q9I299|Q9I299_PSEAE	tr|Q9I299|Q9I299_PSEAE	5	5	5	>tr|Q9I299|Q9I299_PSEAE Methylcrotonyl-CoA carboxylase, alpha-subunit (Biotin-containing) OS=Pseudomonas aeruginosa (strain ATCC 15692 / PAO1 / 1C / PRS 101 / LMG 12228) GN=liuD PE=1 SV=1	1	5	5	5	12.2	12.2	12.2	71.282	655	655	0	34.243	14950000	5				226	207;223;316;602;976	True;True;True;True;True	220;236;331;620;1006	386;413;558;1061;1750	822;860;1108;1109;2071;3452	822;860;1108;2071;3452
tr|Q9I2J2|Q9I2J2_PSEAE	tr|Q9I2J2|Q9I2J2_PSEAE	1	1	1	>tr|Q9I2J2|Q9I2J2_PSEAE ECF sigma factor, FemI OS=Pseudomonas aeruginosa (strain ATCC 15692 / PAO1 / 1C / PRS 101 / LMG 12228) GN=femI PE=3 SV=1	1	1	1	1	9.5	9.5	9.5	19.09	168	168	0.0040486	5.9212	4898100	0				227	1006	TRUE	1036	1809;1810	3672;3673	3672
tr|Q9I2R2|Q9I2R2_PSEAE	tr|Q9I2R2|Q9I2R2_PSEAE	2	2	2	>tr|Q9I2R2|Q9I2R2_PSEAE Probable oxidoreductase OS=Pseudomonas aeruginosa (strain ATCC 15692 / PAO1 / 1C / PRS 101 / LMG 12228) GN=PA1833 PE=4 SV=1	1	2	2	2	10.6	10.6	10.6	34.551	330	330	0	20.673	6318500	4				228	228;377	True;True	241;392	419;420;659;660	872;873;1271;1272	872;1272
tr|Q9I2R5|Q9I2R5_PSEAE	tr|Q9I2R5|Q9I2R5_PSEAE	1	1	1	>tr|Q9I2R5|Q9I2R5_PSEAE Uncharacterized protein OS=Pseudomonas aeruginosa (strain ATCC 15692 / PAO1 / 1C / PRS 101 / LMG 12228) GN=PA1830 PE=4 SV=1	1	1	1	1	10.6	10.6	10.6	11.11	104	104	0	7.6236	5877300	2				229	856	TRUE	882	1544;1545	3059;3060	3060
tr|Q9I2V3|Q9I2V3_PSEAE	tr|Q9I2V3|Q9I2V3_PSEAE	2	2	2	>tr|Q9I2V3|Q9I2V3_PSEAE Uncharacterized protein OS=Pseudomonas aeruginosa (strain ATCC 15692 / PAO1 / 1C / PRS 101 / LMG 12228) GN=PA1789 PE=1 SV=1	1	2	2	2	9.8	9.8	9.8	31.273	287	287	0	13.244	5746300	3				230	216;434	True;True	229;451	403;404;755	849;850;1434	850;1434
tr|Q9I2W9|Q9I2W9_PSEAE	tr|Q9I2W9|Q9I2W9_PSEAE	10	10	10	>tr|Q9I2W9|Q9I2W9_PSEAE Phosphoenolpyruvate synthase OS=Pseudomonas aeruginosa (strain ATCC 15692 / PAO1 / 1C / PRS 101 / LMG 12228) GN=ppsA PE=3 SV=1	1	10	10	10	18.3	18.3	18.3	85.816	791	791	0	78.024	47866000	19				231	42;83;267;398;426;603;658;680;768;825	True;True;True;True;True;True;True;True;True;True	45;88;282;413;443;621;681;704;793;851	82;83;155;156;487;488;695;741;1062;1176;1220;1365;1366;1494;1495;1496;1497;1498	191;192;193;349;350;1006;1007;1335;1414;2072;2384;2475;2716;2717;2990;2991;2992;2993;2994;2995	191;349;1006;1335;1414;2072;2384;2475;2716;2990
tr|Q9I2Z1|Q9I2Z1_PSEAE	tr|Q9I2Z1|Q9I2Z1_PSEAE	1	1	1	>tr|Q9I2Z1|Q9I2Z1_PSEAE Uncharacterized protein OS=Pseudomonas aeruginosa (strain ATCC 15692 / PAO1 / 1C / PRS 101 / LMG 12228) GN=PA1746 PE=4 SV=1	1	1	1	1	6.5	6.5	6.5	18.189	168	168	0.0041667	6.0289	3650900	1				232	119	TRUE	127	221	488	488
tr|Q9I3B2|Q9I3B2_PSEAE	tr|Q9I3B2|Q9I3B2_PSEAE	4	4	4	>tr|Q9I3B2|Q9I3B2_PSEAE Beta-ketoacyl-ACP synthase I OS=Pseudomonas aeruginosa (strain ATCC 15692 / PAO1 / 1C / PRS 101 / LMG 12228) GN=fabB PE=3 SV=1	1	4	4	4	15.1	15.1	15.1	42.806	405	405	0	29.993	18169000	7				233	195;255;292;816	True;True;True;True	208;270;307;842	367;368;468;525;526;1481	769;770;771;772;967;1060;1061;2974	769;967;1060;2974
tr|Q9I3D3|Q9I3D3_PSEAE	tr|Q9I3D3|Q9I3D3_PSEAE	13	13	13	>tr|Q9I3D3|Q9I3D3_PSEAE 2-oxoglutarate dehydrogenase (E1 subunit) OS=Pseudomonas aeruginosa (strain ATCC 15692 / PAO1 / 1C / PRS 101 / LMG 12228) GN=sucA PE=4 SV=1	1	13	13	13	20.4	20.4	20.4	105.88	943	943	0	110.97	109830000	55				234	156;162;243;277;356;413;470;498;566;567;581;623;778	True;True;True;True;True;True;True;True;True;True;True;True;True	166;172;257;292;371;429;487;515;584;585;599;642;804	289;298;299;447;448;449;502;503;504;625;626;716;717;822;823;868;869;870;871;997;998;999;1000;1025;1094;1095;1381	590;613;614;615;616;617;618;917;918;919;920;921;1024;1025;1026;1027;1028;1217;1218;1363;1364;1365;1366;1367;1368;1369;1370;1371;1372;1373;1374;1375;1615;1616;1617;1696;1697;1698;1699;1700;1701;1702;1703;1945;1946;1947;1948;1949;1950;1951;1952;1953;1996;2121;2122;2767	590;614;919;1024;1218;1364;1616;1698;1945;1952;1996;2122;2767
tr|Q9I3D4|Q9I3D4_PSEAE	tr|Q9I3D4|Q9I3D4_PSEAE	4	4	4	>tr|Q9I3D4|Q9I3D4_PSEAE Succinate dehydrogenase (B subunit) OS=Pseudomonas aeruginosa (strain ATCC 15692 / PAO1 / 1C / PRS 101 / LMG 12228) GN=sdhB PE=4 SV=1	1	4	4	4	19.6	19.6	19.6	26.155	235	235	0	27.439	32728000	11				235	250;285;507;596	True;True;True;True	265;300;524;614	461;462;515;516;882;883;1052	952;953;1046;1047;1048;1049;1717;1718;1719;1720;2059	952;1047;1717;2059
tr|Q9I3D5|Q9I3D5_PSEAE	tr|Q9I3D5|Q9I3D5_PSEAE	10	10	10	>tr|Q9I3D5|Q9I3D5_PSEAE Succinate dehydrogenase flavoprotein subunit OS=Pseudomonas aeruginosa (strain ATCC 15692 / PAO1 / 1C / PRS 101 / LMG 12228) GN=sdhA PE=3 SV=1	1	10	10	10	24.1	24.1	24.1	63.531	590	590	0	106.18	77264000	32				236	146;256;307;318;341;410;474;528;662;846	True;True;True;True;True;True;True;True;True;True	156;271;322;333;356;426;491;545;685;872	272;273;469;470;546;547;560;561;597;598;713;827;828;829;922;923;1181;1182;1528;1529	566;567;568;968;969;970;1083;1084;1085;1086;1111;1112;1163;1164;1165;1166;1167;1168;1358;1359;1623;1624;1625;1626;1627;1797;1798;1799;1800;2389;2390;2391;3033;3034	566;968;1085;1112;1164;1358;1623;1797;2389;3033
tr|Q9I3G0|Q9I3G0_PSEAE	tr|Q9I3G0|Q9I3G0_PSEAE	2	2	2	>tr|Q9I3G0|Q9I3G0_PSEAE Cytochrome c oxidase, cbb3-type, CcoN subunit OS=Pseudomonas aeruginosa (strain ATCC 15692 / PAO1 / 1C / PRS 101 / LMG 12228) GN=ccoN2 PE=3 SV=1	1	2	2	2	6.1	6.1	6.1	53.09	475	475	0	12.925	13669000	4				237	784;858	True;True	810;884	1431;1432;1548;1549	2854;2855;3063;3064	2855;3063
tr|Q9I3G1|Q9I3G1_PSEAE;tr|Q9I3G4|Q9I3G4_PSEAE	tr|Q9I3G1|Q9I3G1_PSEAE	3;1	3;1	3;1	>tr|Q9I3G1|Q9I3G1_PSEAE Cytochrome c oxidase, cbb3-type, CcoO subunit OS=Pseudomonas aeruginosa (strain ATCC 15692 / PAO1 / 1C / PRS 101 / LMG 12228) GN=ccoO2 PE=4 SV=1	2	3	3	3	20.3	20.3	20.3	22.778	202	202;203	0	19.807	16948000	8				238	629;808;828	True;True;True	649;834;854	1105;1469;1470;1471;1502;1503	2142;2946;2947;2948;2949;2999;3000;3001	2142;2949;3000
tr|Q9I3G2|Q9I3G2_PSEAE	tr|Q9I3G2|Q9I3G2_PSEAE	6	6	6	>tr|Q9I3G2|Q9I3G2_PSEAE Cbb3-type cytochrome c oxidase subunit OS=Pseudomonas aeruginosa (strain ATCC 15692 / PAO1 / 1C / PRS 101 / LMG 12228) GN=ccoP2 PE=3 SV=1	1	6	6	6	31.8	31.8	31.8	33.812	308	308	0	39.036	27088000	7				239	305;366;376;705;994;998	True;True;True;True;True;True	320;381;391;729;1024;1028	544;642;657;658;1253;1778;1779;1785	1081;1244;1245;1269;1270;2529;3499;3500;3506	1081;1244;1269;2529;3500;3506
tr|Q9I3G6|Q9I3G6_PSEAE	tr|Q9I3G6|Q9I3G6_PSEAE	1	1	1	>tr|Q9I3G6|Q9I3G6_PSEAE Probable ferredoxin OS=Pseudomonas aeruginosa (strain ATCC 15692 / PAO1 / 1C / PRS 101 / LMG 12228) GN=PA1551 PE=4 SV=1	1	1	1	1	2.1	2.1	2.1	53.62	471	471	0	6.6059	6751600	2				240	351	TRUE	366	616;617	1207;1208	1208
tr|Q9I4I1|Q9I4I1_PSEAE	tr|Q9I4I1|Q9I4I1_PSEAE	3	3	3	>tr|Q9I4I1|Q9I4I1_PSEAE Ribonucleoside-diphosphate reductase OS=Pseudomonas aeruginosa (strain ATCC 15692 / PAO1 / 1C / PRS 101 / LMG 12228) GN=nrdA PE=3 SV=1	1	3	3	3	4.2	4.2	4.2	107.11	963	963	0	19.6	4841900	5				241	303;645;982	True;True;True	318;668;1012	541;1146;1147;1758;1759	1078;2220;2221;3466;3467;3468	1078;2220;3466
tr|Q9I4I2|Q9I4I2_PSEAE	tr|Q9I4I2|Q9I4I2_PSEAE	3	3	3	>tr|Q9I4I2|Q9I4I2_PSEAE Ribonucleoside-diphosphate reductase subunit beta OS=Pseudomonas aeruginosa (strain ATCC 15692 / PAO1 / 1C / PRS 101 / LMG 12228) GN=nrdB PE=3 SV=1	1	3	3	3	14	14	14	47.386	415	415	0	29.638	4524100	3				242	11;24;84	True;True;True	11;24;89	15;38;157	21;83;84;351	21;83;351
tr|Q9I4X1|Q9I4X1_PSEAE	tr|Q9I4X1|Q9I4X1_PSEAE	1	1	1	>tr|Q9I4X1|Q9I4X1_PSEAE PqsC OS=Pseudomonas aeruginosa (strain ATCC 15692 / PAO1 / 1C / PRS 101 / LMG 12228) GN=pqsC PE=1 SV=1	1	1	1	1	3.4	3.4	3.4	38.238	348	348	0.0044248	6.2708	532560	1				243	568	TRUE	586	1001	1954	1954
tr|Q9I585|Q9I585_PSEAE	tr|Q9I585|Q9I585_PSEAE	1	1	1	>tr|Q9I585|Q9I585_PSEAE Uncharacterized protein OS=Pseudomonas aeruginosa (strain ATCC 15692 / PAO1 / 1C / PRS 101 / LMG 12228) GN=PA0856 PE=1 SV=1	1	1	1	1	6.6	6.6	6.6	19.998	182	182	0.0044643	6.3726	365180	1				244	582	TRUE	600	1026	1997	1997
tr|Q9I5F4|Q9I5F4_PSEAE	tr|Q9I5F4|Q9I5F4_PSEAE	2	2	2	>tr|Q9I5F4|Q9I5F4_PSEAE Probable transcriptional regulator OS=Pseudomonas aeruginosa (strain ATCC 15692 / PAO1 / 1C / PRS 101 / LMG 12228) GN=PA0784 PE=4 SV=1	1	2	2	2	6.5	6.5	6.5	34.382	309	309	0	10.72	1018700	3				245	112;301	True;True	119;316	209;210;539	471;472;1076	472;1076
tr|Q9I5F6|Q9I5F6_PSEAE	tr|Q9I5F6|Q9I5F6_PSEAE	5	5	5	>tr|Q9I5F6|Q9I5F6_PSEAE Bifunctional protein PutA OS=Pseudomonas aeruginosa (strain ATCC 15692 / PAO1 / 1C / PRS 101 / LMG 12228) GN=putA PE=3 SV=1	1	5	5	5	6.4	6.4	6.4	115.63	1060	1060	0	37.706	10173000	7				246	159;190;595;951;963	True;True;True;True;True	169;203;613;980;993	294;359;1050;1051;1709;1732	609;758;2056;2057;2058;3377;3430	609;758;2056;3377;3430
tr|Q9I5F9|Q9I5F9_PSEAE	tr|Q9I5F9|Q9I5F9_PSEAE	1	1	1	>tr|Q9I5F9|Q9I5F9_PSEAE Lon protease OS=Pseudomonas aeruginosa (strain ATCC 15692 / PAO1 / 1C / PRS 101 / LMG 12228) GN=lon PE=2 SV=1	1	1	1	1	1.3	1.3	1.3	88.574	799	799	0.0041494	6.0248	0	1				247	838	TRUE	864	1516	3020	3020
tr|Q9I5I4|Q9I5I4_PSEAE	tr|Q9I5I4|Q9I5I4_PSEAE	1	1	1	>tr|Q9I5I4|Q9I5I4_PSEAE Probable enoyl-CoA hydratase/isomerase OS=Pseudomonas aeruginosa (strain ATCC 15692 / PAO1 / 1C / PRS 101 / LMG 12228) GN=PA0745 PE=3 SV=1	1	1	1	1	4	4	4	29.904	272	272	0.0041152	5.9381	1491600	0				248	298	TRUE	313	535	1070	1070
tr|Q9I5U9|Q9I5U9_PSEAE	tr|Q9I5U9|Q9I5U9_PSEAE	12	12	12	>tr|Q9I5U9|Q9I5U9_PSEAE Uncharacterized protein OS=Pseudomonas aeruginosa (strain ATCC 15692 / PAO1 / 1C / PRS 101 / LMG 12228) GN=PA0588 PE=4 SV=1	1	12	12	12	27.2	27.2	27.2	73.722	640	640	0	99.4	76259000	28				249	95;194;364;545;553;561;605;614;626;657;678;809	True;True;True;True;True;True;True;True;True;True;True;True	102;207;379;562;570;579;623;632;645;680;702;835	179;365;366;639;955;956;971;972;987;988;1064;1065;1079;1080;1099;1174;1175;1217;1472;1473	423;766;767;768;1241;1887;1888;1908;1909;1910;1911;1932;1933;1934;2074;2075;2076;2077;2095;2096;2127;2381;2382;2383;2471;2950;2951;2952;2953	423;767;1241;1887;1908;1932;2074;2096;2127;2381;2471;2950
tr|Q9I5Y8|Q9I5Y8_PSEAE	tr|Q9I5Y8|Q9I5Y8_PSEAE	4	4	4	>tr|Q9I5Y8|Q9I5Y8_PSEAE Transketolase OS=Pseudomonas aeruginosa (strain ATCC 15692 / PAO1 / 1C / PRS 101 / LMG 12228) GN=tktA PE=1 SV=1	1	4	4	4	7.1	7.1	7.1	72.219	665	665	0	24.705	6193200	5				250	21;265;717;920	True;True;True;True	21;280;741;947	33;485;1277;1653	72;73;1004;2570;3236	72;1004;2570;3236
tr|Q9I612|Q9I612_PSEAE	tr|Q9I612|Q9I612_PSEAE	1	1	1	>tr|Q9I612|Q9I612_PSEAE Probable acyl-CoA dehydrogenase OS=Pseudomonas aeruginosa (strain ATCC 15692 / PAO1 / 1C / PRS 101 / LMG 12228) GN=PA0506 PE=3 SV=1	1	1	1	1	1.8	1.8	1.8	65.358	601	601	0.0077519	5.7335	675190	1				251	222	TRUE	235	412	859	859
tr|Q9I659|Q9I659_PSEAE	tr|Q9I659|Q9I659_PSEAE	13	13	11	>tr|Q9I659|Q9I659_PSEAE Probable ClpA/B protease ATP binding subunit OS=Pseudomonas aeruginosa (strain ATCC 15692 / PAO1 / 1C / PRS 101 / LMG 12228) GN=PA0459 PE=4 SV=1	1	13	13	11	20	20	17.3	94.174	850	850	0	89.657	42678000	18				252	61;296;317;537;585;637;650;674;721;796;878;882;914	True;True;True;True;True;True;True;True;True;True;True;True;True	65;311;332;554;603;658;673;697;745;822;904;908;941	116;531;532;559;944;1030;1031;1121;1122;1164;1165;1204;1283;1454;1577;1578;1595;1643	272;1066;1067;1110;1873;1874;2009;2010;2160;2161;2368;2369;2431;2583;2924;3133;3134;3151;3223	272;1066;1110;1873;2009;2161;2368;2431;2583;2924;3133;3151;3223
tr|Q9I671|Q9I671_PSEAE	tr|Q9I671|Q9I671_PSEAE	4	4	4	>tr|Q9I671|Q9I671_PSEAE Glutaryl-CoA dehydrogenase OS=Pseudomonas aeruginosa (strain ATCC 15692 / PAO1 / 1C / PRS 101 / LMG 12228) GN=gcdH PE=3 SV=1	1	4	4	4	15	15	15	43.311	393	393	0	39.151	15500000	7				253	115;189;385;687	True;True;True;True	123;202;400;711	215;216;357;358;672;1229	480;481;482;756;757;1307;2493	480;756;1307;2493
tr|Q9I687|Q9I687_PSEAE	tr|Q9I687|Q9I687_PSEAE	1	1	1	>tr|Q9I687|Q9I687_PSEAE Methylenetetrahydrofolate reductase OS=Pseudomonas aeruginosa (strain ATCC 15692 / PAO1 / 1C / PRS 101 / LMG 12228) GN=metF PE=3 SV=1	1	1	1	1	6.6	6.6	6.6	32.228	290	290	0.0040161	5.9053	1514600	2				254	533	TRUE	550	931	1821;1822	1822
tr|Q9I6A1|Q9I6A1_PSEAE	tr|Q9I6A1|Q9I6A1_PSEAE	1	1	1	>tr|Q9I6A1|Q9I6A1_PSEAE Cystathionine beta-synthase OS=Pseudomonas aeruginosa (strain ATCC 15692 / PAO1 / 1C / PRS 101 / LMG 12228) GN=PA0399 PE=4 SV=1	1	1	1	1	3.5	3.5	3.5	49.17	457	457	0	6.5999	864760	1				255	917	TRUE	944	1646	3226	3226
tr|Q9I6H5|Q9I6H5_PSEAE	tr|Q9I6H5|Q9I6H5_PSEAE	3	3	3	>tr|Q9I6H5|Q9I6H5_PSEAE D-3-phosphoglycerate dehydrogenase OS=Pseudomonas aeruginosa (strain ATCC 15692 / PAO1 / 1C / PRS 101 / LMG 12228) GN=serA PE=3 SV=1	1	3	3	3	10	10	10	44.216	409	409	0	22.199	10509000	5				256	6;767;890	True;True;True	6;792;916	8;9;1364;1607	12;13;14;2715;3167	13;2715;3167
tr|Q9I6J2|Q9I6J2_PSEAE	tr|Q9I6J2|Q9I6J2_PSEAE	2	2	2	>tr|Q9I6J2|Q9I6J2_PSEAE Putrescine aminotransferase OS=Pseudomonas aeruginosa (strain ATCC 15692 / PAO1 / 1C / PRS 101 / LMG 12228) GN=spuC PE=3 SV=1	1	2	2	2	7.7	7.7	7.7	50.452	456	456	0	12.64	3144700	1				257	814;997	True;True	840;1027	1479;1784	2972;3505	2972;3505
tr|Q9I6Z1|Q9I6Z1_PSEAE	tr|Q9I6Z1|Q9I6Z1_PSEAE	1	1	1	>tr|Q9I6Z1|Q9I6Z1_PSEAE Uncharacterized protein OS=Pseudomonas aeruginosa (strain ATCC 15692 / PAO1 / 1C / PRS 101 / LMG 12228) GN=PA0141 PE=4 SV=1	1	1	1	1	6	6	6	34.463	298	298	0.0078125	5.7526	1669400	1				258	988	TRUE	1018	1768	3478	3478
tr|Q9I6Z3|Q9I6Z3_PSEAE	tr|Q9I6Z3|Q9I6Z3_PSEAE	6	6	6	>tr|Q9I6Z3|Q9I6Z3_PSEAE Alkyl hydroperoxide reductase subunit C OS=Pseudomonas aeruginosa (strain ATCC 15692 / PAO1 / 1C / PRS 101 / LMG 12228) GN=ahpC PE=4 SV=1	1	6	6	6	29.9	29.9	29.9	20.541	187	187	0	46.441	63643000	17				259	279;367;761;821;822;987	True;True;True;True;True;True	294;382;786;847;848;1017	507;508;643;1355;1356;1488;1489;1490;1491;1766;1767	1031;1032;1033;1034;1035;1246;1247;2696;2697;2698;2699;2984;2985;2986;2987;3476;3477	1032;1246;2696;2985;2987;3476
tr|Q9I748|Q9I748_PSEAE	tr|Q9I748|Q9I748_PSEAE	3	3	3	>tr|Q9I748|Q9I748_PSEAE Uncharacterized protein OS=Pseudomonas aeruginosa (strain ATCC 15692 / PAO1 / 1C / PRS 101 / LMG 12228) GN=PA0084 PE=4 SV=1	1	3	3	3	12.7	12.7	12.7	55.771	498	498	0	21.252	9147700	3				260	35;755;820	True;True;True	37;780;846	69;1344;1345;1487	172;2680;2681;2983	172;2680;2983

## Sheet: 3-1 Sheet1
Protein IDs-C4HSL (full)
sp|G3XD12|HCNC_PSEAE
sp|G3XD23|WBPB_PSEAE
sp|G3XD61|WBPI_PSEAE
sp|G3XD76|DAPD_PSEAE
sp|G3XD94|UGND_PSEAE
sp|O30508|ARUC_PSEAE
sp|O52759|RS4_PSEAE
sp|O52760|RPOA_PSEAE
sp|O52762|CATA_PSEAE
sp|O54439|ACP1_PSEAE
sp|O68822|AMPA_PSEAE
sp|O69754|PHZF_PSEAE
sp|O82850|RS2_PSEAE
sp|O86428|ILVE_PSEAE
sp|O87125|CHEB1_PSEAE
sp|O87131|CHER1_PSEAE
sp|P04739|FMPO_PSEAE
sp|P05384|DBHB_PSEAE
sp|P08280|RECA_PSEAE
sp|P08308|OTCC_PSEAE
sp|P09591|EFTU_PSEAE
sp|P11221|OPRI_PSEAE
sp|P11436|AMIE_PSEAE
sp|P13794|PORF_PSEAE
sp|P13981|ARCA_PSEAE
sp|P13982|ARCC_PSEAE
sp|P14165|CISY_PSEAE
sp|P15276|ALGP_PSEAE
sp|P20580|TRPE_PSEAE
sp|P20582|PQSD_PSEAE
sp|P22008|P5CR_PSEAE
sp|P22608|PILB_PSEAE
sp|P26276|ALGC_PSEAE
sp|P26480|RPOD_PSEAE
sp|P27726|G3P_PSEAE
sp|P28810|MMSA_PSEAE
sp|P29363|THRC_PSEAE
sp|P29365|DHOM_PSEAE
sp|P30718|CH60_PSEAE
sp|P34002|AROB_PSEAE
sp|P37798|ACCC_PSEAE
sp|P37799|BCCP_PSEAE
sp|P38100|CARB_PSEAE
sp|P43336|PHHC_PSEAE
sp|P47203|FTSA_PSEAE
sp|P47204|FTSZ_PSEAE
sp|P48247|GSA_PSEAE
sp|P48372|GYRA_PSEAE
sp|P50597|RNPH_PSEAE
sp|P50987|ARLY_PSEAE
sp|P52002|MEXB_PSEAE
sp|P53593|SUCC_PSEAE
sp|P53641|SODF_PSEAE
sp|P57112|STHA_PSEAE
sp|P72138|HIS52_PSEAE
sp|P72139|HIS62_PSEAE
sp|P72173|AAT_PSEAE
sp|P77915|HEMN_PSEAE
sp|Q51342|PUR1_PSEAE
sp|Q51390|GLPK2_PSEAE
sp|Q51422|SYDND_PSEAE
sp|Q51551|PYRX_PSEAE
sp|Q51561|RPOB_PSEAE
sp|Q51567|SUCD_PSEAE
sp|Q59636|NDK_PSEAE
sp|Q59637|ODP1_PSEAE
sp|Q59638|ODP2_PSEAE
sp|Q59653|PYRB_PSEAE
sp|Q9HT16|ATPF_PSEAE
sp|Q9HT17|ATPD_PSEAE
sp|Q9HT18|ATPA_PSEAE
sp|Q9HT19|ATPG_PSEAE
sp|Q9HT20|ATPB_PSEAE
sp|Q9HT95|ATSE4_PSEAE
sp|Q9HTD7|ASPA_PSEAE
sp|Q9HTJ1|BETB_PSEAE
sp|Q9HTN8|RL28_PSEAE
sp|Q9HTQ0|DADA1_PSEAE
sp|Q9HTV1|RHO_PSEAE
sp|Q9HTZ7|PCKA_PSEAE
sp|Q9HU65|GLNA_PSEAE
sp|Q9HU83|HUTU_PSEAE
sp|Q9HUA6|OPGH_PSEAE
sp|Q9HUC0|UBIE_PSEAE
sp|Q9HUC8|SYR_PSEAE
sp|Q9HUD0|RL31_PSEAE
sp|Q9HUG9|HLDE_PSEAE
sp|Q9HUJ8|PARE_PSEAE
sp|Q9HUM0|HFQ_PSEAE
sp|Q9HUM6|PURA_PSEAE
sp|Q9HUM9|RS6_PSEAE
sp|Q9HW26|PNCB2_PSEAE;sp|Q9HUP4|PNCB1_PSEAE
sp|Q9HUU5|URE1_PSEAE
sp|Q9HUX1|SPEA_PSEAE
sp|Q9HV43|DNAK_PSEAE
sp|Q9HV50|GLMM_PSEAE
sp|Q9HV55|IF2_PSEAE
sp|Q9HV59|PNP_PSEAE
sp|Q9HVA2|ILVC_PSEAE
sp|Q9HVC4|RL25_PSEAE
sp|Q9HVC5|KPRS_PSEAE
sp|Q9HVF1|MQO2_PSEAE
sp|Q9HVI7|GLYA3_PSEAE;sp|Q9I138|GLYA2_PSEAE
sp|Q9HVM4|SYI_PSEAE
sp|Q9HVN5|CLPB_PSEAE
sp|Q9HVT8|GATA_PSEAE
sp|Q9HVV3|Y4465_PSEAE
sp|Q9HVW7|MURA_PSEAE
sp|Q9HVX6|SYW_PSEAE
sp|Q9HW01|MURG_PSEAE
sp|Q9HW02|MURC_PSEAE
sp|Q9HWC5|RL11_PSEAE
sp|Q9HWC9|RPOC_PSEAE
sp|Q9HWD0|RS12_PSEAE
sp|Q9HWD2|EFG1_PSEAE;sp|Q9I244|EFG2_PSEAE
sp|Q9HWD5|RL3_PSEAE
sp|Q9HWD8|RL2_PSEAE
sp|Q9HWE0|RL22_PSEAE
sp|Q9HWE1|RS3_PSEAE
sp|Q9HWE5|RL14_PSEAE
sp|Q9HWE9|RS8_PSEAE
sp|Q9HWF1|RL18_PSEAE
sp|Q9HWF2|RS5_PSEAE
sp|Q9HWF3|RL30_PSEAE
sp|Q9HWF7|RS13_PSEAE
sp|Q9HWF8|RS11_PSEAE
sp|Q9HWG0|UVRA_PSEAE
sp|Q9HWX4|RIBB_PSEAE
sp|Q9HX20|PROA_PSEAE
sp|Q9HX33|SYL_PSEAE
sp|Q9HXE5|RHLB_PSEAE
sp|Q9HXH0|SYV_PSEAE
sp|Q9HXI8|ISCS_PSEAE
sp|Q9HXJ4|ISPG_PSEAE
sp|Q9HXJ5|SYH_PSEAE
sp|Q9HXK5|LEU1_PSEAE
sp|Q9HXM6|GUAA_PSEAE
sp|Q9HXN2|PUR4_PSEAE
sp|Q9HXZ1|DPO3A_PSEAE
sp|Q9HXZ2|ACCA_PSEAE
sp|Q9HXZ4|PYRG_PSEAE
sp|Q9HXZ5|ENO_PSEAE
sp|Q9HY84|ASSY_PSEAE
sp|Q9HYA4|ASPD_PSEAE
sp|Q9HYC7|SYM_PSEAE
sp|Q9HYD5|MAO1_PSEAE
sp|Q9HYQ8|HLDD_PSEAE
sp|Q9HYR2|FABH_PSEAE
sp|Q9HYX7|RDGC_PSEAE
sp|Q9HZ66|SERC_PSEAE
sp|Q9HZ71|RS1_PSEAE
sp|Q9HZ76|WBPE_PSEAE
sp|Q9HZA7|ACCD_PSEAE
sp|Q9HZE0|DHE2_PSEAE
sp|Q9HZF8|PYRD_PSEAE
sp|Q9HZJ2|FADB_PSEAE
sp|Q9HZJ3|FADA_PSEAE
sp|Q9HZP5|ETFD_PSEAE
sp|Q9HZP6|ETFB_PSEAE
sp|Q9HZZ2|EFP_PSEAE
sp|Q9I047|TAL_PSEAE
sp|Q9I099|SYT_PSEAE
sp|Q9I0A2|RL20_PSEAE
sp|Q9I0A3|SYFA_PSEAE
sp|Q9I0A4|SYFB_PSEAE
sp|Q9I0H4|HMP_PSEAE
sp|Q9I0J5|NUOH_PSEAE
sp|Q9I0J6|NUOG_PSEAE
sp|Q9I0J7|NUOF_PSEAE
sp|Q9I0J9|NUOCD_PSEAE
sp|Q9I0K0|NUOB_PSEAE
sp|Q9I0K4|ACEA_PSEAE
sp|Q9I0Q0|PQSH_PSEAE
sp|Q9I137|GCSP1_PSEAE
sp|Q9I1L9|DLDH1_PSEAE
sp|Q9I1M0|ODB2_PSEAE
sp|Q9I1M1|ODBB_PSEAE
sp|Q9I1M2|ODBA_PSEAE
sp|Q9I1S2|HCNB_PSEAE
sp|Q9I291|GALU_PSEAE
sp|Q9I2A8|ATOB_PSEAE
sp|Q9I2P8|NFUA_PSEAE
sp|Q9I2Q2|METH_PSEAE
sp|Q9I2U0|CLPX_PSEAE
sp|Q9I2U8|SYQ_PSEAE
sp|Q9I2V5|ACNB_PSEAE
sp|Q9I2W7|RRAAH_PSEAE
sp|Q9I383|SELD_PSEAE
sp|Q9I3D1|DLDH2_PSEAE
sp|Q9I3D2|ODO2_PSEAE
sp|Q9I3F5|ACNA_PSEAE
sp|Q9I4F5|DCTA2_PSEAE
sp|Q9I4Z4|PAL_PSEAE
sp|Q9I502|SYP_PSEAE
sp|Q9I513|PUR5_PSEAE
sp|Q9I553|SYA_PSEAE
sp|Q9I558|ACSA1_PSEAE
sp|Q9I576|HPPD_PSEAE
sp|Q9I5A5|PTA_PSEAE
sp|Q9I5G8|LEPA_PSEAE
sp|Q9I5Y1|ALF_PSEAE
sp|Q9I5Y4|PGK_PSEAE
sp|Q9I5Z0|METK_PSEAE
sp|Q9I636|MASZ_PSEAE
sp|Q9I685|SAHH_PSEAE
sp|Q9I6E0|ILVD_PSEAE
sp|Q9I6M4|DAVT_PSEAE
sp|Q9I6M5|DAVD_PSEAE
sp|Q9I702|BAUC_PSEAE
sp|Q9I742|CLPV1_PSEAE
sp|Q9I747|HCP1_PSEAE
sp|Q9I7B8|SYGB_PSEAE
sp|Q9I7C2|GYRB_PSEAE
sp|Q9LCT3|SECA_PSEAE
sp|Q9S508|PHZB2_PSEAE;sp|O69753|PHZB1_PSEAE
sp|Q9S646|PPK_PSEAE
sp|Q9X2T1|THIO_PSEAE
sp|Q9X4G0|HGD_PSEAE
sp|Q9XCL6|SYE_PSEAE
tr|G3XCT6|G3XCT6_PSEAE
tr|G3XCV0|G3XCV0_PSEAE
tr|G3XD64|G3XD64_PSEAE
tr|G3XDA2|G3XDA2_PSEAE
tr|Q7DC82|Q7DC82_PSEAE
tr|Q9HT77|Q9HT77_PSEAE
tr|Q9HTD1|Q9HTD1_PSEAE
tr|Q9HTD9|Q9HTD9_PSEAE
tr|Q9HTM4|Q9HTM4_PSEAE
tr|Q9HTP2|Q9HTP2_PSEAE
tr|Q9HTW6|Q9HTW6_PSEAE
tr|Q9HU24|Q9HU24_PSEAE
tr|Q9HUD3|Q9HUD3_PSEAE
tr|Q9HUE2|Q9HUE2_PSEAE
tr|Q9HUG0|Q9HUG0_PSEAE
tr|Q9HUM2|Q9HUM2_PSEAE
tr|Q9HUM7|Q9HUM7_PSEAE
tr|Q9HV48|Q9HV48_PSEAE
tr|Q9HV54|Q9HV54_PSEAE
tr|Q9HV73|Q9HV73_PSEAE
tr|Q9HV96|Q9HV96_PSEAE
tr|Q9HVA0|Q9HVA0_PSEAE
tr|Q9HVD5|Q9HVD5_PSEAE
tr|Q9HVH3|Q9HVH3_PSEAE
tr|Q9HVI3|Q9HVI3_PSEAE
tr|Q9HVJ1|Q9HVJ1_PSEAE
tr|Q9HVL1|Q9HVL1_PSEAE
tr|Q9HVS8|Q9HVS8_PSEAE
tr|Q9HVU0|Q9HVU0_PSEAE
tr|Q9HVV6|Q9HVV6_PSEAE
tr|Q9HVX7|Q9HVX7_PSEAE
tr|Q9HVY4|Q9HVY4_PSEAE
tr|Q9HVY5|Q9HVY5_PSEAE
tr|Q9HVY6|Q9HVY6_PSEAE
tr|Q9HW15|Q9HW15_PSEAE
tr|Q9HW49|Q9HW49_PSEAE
tr|Q9HW68|Q9HW68_PSEAE
tr|Q9HW72|Q9HW72_PSEAE
tr|Q9HW73|Q9HW73_PSEAE
tr|Q9HWG9|Q9HWG9_PSEAE
tr|Q9HWH2|Q9HWH2_PSEAE
tr|Q9HWK1|Q9HWK1_PSEAE
tr|Q9HWP8|Q9HWP8_PSEAE
tr|Q9HWP9|Q9HWP9_PSEAE
tr|Q9HWQ0|Q9HWQ0_PSEAE
tr|Q9HWV0|Q9HWV0_PSEAE
tr|Q9HWW7|Q9HWW7_PSEAE
tr|Q9HX05|Q9HX05_PSEAE;tr|Q9I2C4|Q9I2C4_PSEAE
tr|Q9HX44|Q9HX44_PSEAE
tr|Q9HX46|Q9HX46_PSEAE
tr|Q9HX94|Q9HX94_PSEAE
tr|Q9HXM5|Q9HXM5_PSEAE
tr|Q9HY01|Q9HY01_PSEAE
tr|Q9HY12|Q9HY12_PSEAE
tr|Q9HY13|Q9HY13_PSEAE
tr|Q9HY24|Q9HY24_PSEAE
tr|Q9HY77|Q9HY77_PSEAE
tr|Q9HY79|Q9HY79_PSEAE
tr|Q9HY81|Q9HY81_PSEAE
tr|Q9HYC8|Q9HYC8_PSEAE
tr|Q9HYP0|Q9HYP0_PSEAE
tr|Q9HYR5|Q9HYR5_PSEAE
tr|Q9HYR6|Q9HYR6_PSEAE
tr|Q9HYR7|Q9HYR7_PSEAE
tr|Q9HYR8|Q9HYR8_PSEAE
tr|Q9HYT5|Q9HYT5_PSEAE
tr|Q9HYZ6|Q9HYZ6_PSEAE
tr|Q9HZ78|Q9HZ78_PSEAE
tr|Q9HZC5|Q9HZC5_PSEAE
tr|Q9HZK4|Q9HZK4_PSEAE
tr|Q9I003|Q9I003_PSEAE
tr|Q9I015|Q9I015_PSEAE
tr|Q9I028|Q9I028_PSEAE
tr|Q9I0B5|Q9I0B5_PSEAE
tr|Q9I0F9|Q9I0F9_PSEAE
tr|Q9I0L4|Q9I0L4_PSEAE
tr|Q9I0L5|Q9I0L5_PSEAE
tr|Q9I0L8|Q9I0L8_PSEAE
tr|Q9I0T1|Q9I0T1_PSEAE
tr|Q9I0T2|Q9I0T2_PSEAE
tr|Q9I0U4|Q9I0U4_PSEAE
tr|Q9I1B3|Q9I1B3_PSEAE
tr|Q9I1F5|Q9I1F5_PSEAE
tr|Q9I1H3|Q9I1H3_PSEAE
tr|Q9I1N7|Q9I1N7_PSEAE
tr|Q9I1Z6|Q9I1Z6_PSEAE
tr|Q9I246|Q9I246_PSEAE
tr|Q9I296|Q9I296_PSEAE
tr|Q9I297|Q9I297_PSEAE
tr|Q9I299|Q9I299_PSEAE
tr|Q9I2A9|Q9I2A9_PSEAE
tr|Q9I2R2|Q9I2R2_PSEAE
tr|Q9I2T9|Q9I2T9_PSEAE
tr|Q9I2V3|Q9I2V3_PSEAE
tr|Q9I2W9|Q9I2W9_PSEAE
tr|Q9I2Z1|Q9I2Z1_PSEAE
tr|Q9I2Z5|Q9I2Z5_PSEAE
tr|Q9I367|Q9I367_PSEAE
tr|Q9I3B2|Q9I3B2_PSEAE
tr|Q9I3D3|Q9I3D3_PSEAE
tr|Q9I3D4|Q9I3D4_PSEAE
tr|Q9I3D5|Q9I3D5_PSEAE
tr|Q9I3G0|Q9I3G0_PSEAE
tr|Q9I3G1|Q9I3G1_PSEAE;tr|Q9I3G4|Q9I3G4_PSEAE
tr|Q9I3G2|Q9I3G2_PSEAE
tr|Q9I3G3|Q9I3G3_PSEAE
tr|Q9I3G6|Q9I3G6_PSEAE
tr|Q9I3I1|Q9I3I1_PSEAE
tr|Q9I3X2|Q9I3X2_PSEAE
tr|Q9I4I1|Q9I4I1_PSEAE
tr|Q9I4I2|Q9I4I2_PSEAE
tr|Q9I4Q5|Q9I4Q5_PSEAE
tr|Q9I4S1|Q9I4S1_PSEAE
tr|Q9I4X1|Q9I4X1_PSEAE
tr|Q9I4X2|Q9I4X2_PSEAE
tr|Q9I522|Q9I522_PSEAE
tr|Q9I524|Q9I524_PSEAE
tr|Q9I5F5|Q9I5F5_PSEAE
tr|Q9I5F6|Q9I5F6_PSEAE
tr|Q9I5F9|Q9I5F9_PSEAE
tr|Q9I5I4|Q9I5I4_PSEAE
tr|Q9I5I5|Q9I5I5_PSEAE
tr|Q9I5U9|Q9I5U9_PSEAE
tr|Q9I5Y8|Q9I5Y8_PSEAE
tr|Q9I612|Q9I612_PSEAE
tr|Q9I654|Q9I654_PSEAE
tr|Q9I659|Q9I659_PSEAE
tr|Q9I671|Q9I671_PSEAE
tr|Q9I687|Q9I687_PSEAE
tr|Q9I688|Q9I688_PSEAE
tr|Q9I689|Q9I689_PSEAE
tr|Q9I696|Q9I696_PSEAE
tr|Q9I6A0|Q9I6A0_PSEAE
tr|Q9I6D9|Q9I6D9_PSEAE
tr|Q9I6H5|Q9I6H5_PSEAE
tr|Q9I6J2|Q9I6J2_PSEAE
tr|Q9I6J3|Q9I6J3_PSEAE
tr|Q9I6Z1|Q9I6Z1_PSEAE
tr|Q9I6Z3|Q9I6Z3_PSEAE
tr|Q9I748|Q9I748_PSEAE
tr|Q9I762|Q9I762_PSEAE
Probe 12 (subtracted)
sp|G3XD01|WBPD_PSEAE
sp|O50175|ASTB_PSEAE
sp|O69753|PHZB1_PSEAE
sp|O82851|EFTS_PSEAE
sp|P32722|PORD_PSEAE
sp|P57668|TPX_PSEAE
sp|Q9HT21|ATPE_PSEAE
sp|Q9HV51|TPIS_PSEAE
sp|Q9HVL6|RL21_PSEAE
sp|Q9HVY3|RS9_PSEAE
sp|Q9HW04|ARGJ_PSEAE
sp|Q9HW11|Y4395_PSEAE
sp|Q9HWC7|RL10_PSEAE
sp|Q9HWC8|RL7_PSEAE
sp|Q9HWD1|RS7_PSEAE
sp|Q9HWE2|RL16_PSEAE
sp|Q9HWE7|RL5_PSEAE
sp|Q9HWE8|RS14_PSEAE
sp|Q9HWZ6|IPYR_PSEAE
sp|Q9HXL8|EX7L_PSEAE
sp|Q9HYR3|Y3332_PSEAE
sp|Q9HYR9|CLPP2_PSEAE
sp|Q9I165|TREA_PSEAE
sp|Q9I2U1|CLPP1_PSEAE
sp|Q9I3C5|HTPG_PSEAE
sp|Q9I4W3|DAPA_PSEAE
sp|Q9I617|BIOF_PSEAE
sp|Q9S508|PHZB2_PSEAE
tr|G3XD72|G3XD72_PSEAE
tr|Q9HTM0|Q9HTM0_PSEAE
tr|Q9HTU9|Q9HTU9_PSEAE
tr|Q9HU11|Q9HU11_PSEAE
tr|Q9HU23|Q9HU23_PSEAE
tr|Q9HVF9|Q9HVF9_PSEAE
tr|Q9HXW4|Q9HXW4_PSEAE
tr|Q9I124|Q9I124_PSEAE
tr|Q9I140|Q9I140_PSEAE
tr|Q9I1E8|Q9I1E8_PSEAE
tr|Q9I1H5|Q9I1H5_PSEAE
tr|Q9I1U4|Q9I1U4_PSEAE
tr|Q9I2J2|Q9I2J2_PSEAE
tr|Q9I2R5|Q9I2R5_PSEAE
tr|Q9I585|Q9I585_PSEAE
tr|Q9I5F4|Q9I5F4_PSEAE
tr|Q9I6A1|Q9I6A1_PSEAE

## Sheet: 3-1 Sheet2
Protein IDs-Probe 12 (subtracted)	Protein IDs-Probe 12 (full)			Fasta headers	Number of proteins	Peptides	Razor + unique peptides
sp|G3XD01|WBPD_PSEAE	sp|G3XD01|WBPD_PSEAE			>sp|G3XD01|WBPD_PSEAE UDP-2-acetamido-3-amino-2,3-dideoxy-D-glucuronate N-acetyltransferase OS=Pseudomonas aeruginosa (strain ATCC 15692 / PAO1 / 1C / PRS 101 / LMG 12228) GN=wbpD PE=1 SV=1	1	1	1
sp|O50175|ASTB_PSEAE	sp|G3XD12|HCNC_PSEAE			>sp|G3XD12|HCNC_PSEAE Hydrogen cyanide synthase subunit HcnC OS=Pseudomonas aeruginosa (strain ATCC 15692 / PAO1 / 1C / PRS 101 / LMG 12228) GN=hcnC PE=1 SV=1	1	2	2
sp|O69753|PHZB1_PSEAE	sp|G3XD23|WBPB_PSEAE			>sp|G3XD23|WBPB_PSEAE UDP-N-acetyl-2-amino-2-deoxy-D-glucuronate oxidase OS=Pseudomonas aeruginosa (strain ATCC 15692 / PAO1 / 1C / PRS 101 / LMG 12228) GN=wbpB PE=1 SV=1	1	4	4
sp|O82851|EFTS_PSEAE	sp|G3XD61|WBPI_PSEAE			>sp|G3XD61|WBPI_PSEAE UDP-2,3-diacetamido-2,3-dideoxy-D-glucuronate 2-epimerase OS=Pseudomonas aeruginosa (strain ATCC 15692 / PAO1 / 1C / PRS 101 / LMG 12228) GN=wbpI PE=1 SV=1	1	1	1
sp|P32722|PORD_PSEAE	sp|G3XD94|UGND_PSEAE			>sp|G3XD94|UGND_PSEAE UDP-N-acetyl-D-glucosamine 6-dehydrogenase OS=Pseudomonas aeruginosa (strain ATCC 15692 / PAO1 / 1C / PRS 101 / LMG 12228) GN=wbpA PE=1 SV=1	1	7	7
sp|P57668|TPX_PSEAE	sp|O50175|ASTB_PSEAE			>sp|O50175|ASTB_PSEAE N-succinylarginine dihydrolase OS=Pseudomonas aeruginosa (strain ATCC 15692 / PAO1 / 1C / PRS 101 / LMG 12228) GN=astB PE=3 SV=1	1	1	1
sp|Q9HT21|ATPE_PSEAE	sp|O52759|RS4_PSEAE			>sp|O52759|RS4_PSEAE 30S ribosomal protein S4 OS=Pseudomonas aeruginosa (strain ATCC 15692 / PAO1 / 1C / PRS 101 / LMG 12228) GN=rpsD PE=3 SV=2	1	4	4
sp|Q9HV51|TPIS_PSEAE	sp|O52760|RPOA_PSEAE			>sp|O52760|RPOA_PSEAE DNA-directed RNA polymerase subunit alpha OS=Pseudomonas aeruginosa (strain ATCC 15692 / PAO1 / 1C / PRS 101 / LMG 12228) GN=rpoA PE=3 SV=2	1	8	8
sp|Q9HVL6|RL21_PSEAE	sp|O52762|CATA_PSEAE			>sp|O52762|CATA_PSEAE Catalase OS=Pseudomonas aeruginosa (strain ATCC 15692 / PAO1 / 1C / PRS 101 / LMG 12228) GN=katA PE=1 SV=1	1	7	7
sp|Q9HVY3|RS9_PSEAE	sp|O54439|ACP1_PSEAE			>sp|O54439|ACP1_PSEAE Acyl carrier protein 1 OS=Pseudomonas aeruginosa (strain ATCC 15692 / PAO1 / 1C / PRS 101 / LMG 12228) GN=acpP1 PE=3 SV=4	1	2	2
sp|Q9HW04|ARGJ_PSEAE	sp|O68822|AMPA_PSEAE			>sp|O68822|AMPA_PSEAE Cytosol aminopeptidase OS=Pseudomonas aeruginosa (strain ATCC 15692 / PAO1 / 1C / PRS 101 / LMG 12228) GN=pepA PE=3 SV=1	1	7	7
sp|Q9HW11|Y4395_PSEAE	sp|O69753|PHZB1_PSEAE			>sp|O69753|PHZB1_PSEAE Phenazine biosynthesis protein PhzB 1 OS=Pseudomonas aeruginosa (strain ATCC 15692 / PAO1 / 1C / PRS 101 / LMG 12228) GN=phzB1 PE=3 SV=1	1	2	1
sp|Q9HWC7|RL10_PSEAE	sp|O69754|PHZF_PSEAE			>sp|O69754|PHZF_PSEAE Trans-2,3-dihydro-3-hydroxyanthranilate isomerase OS=Pseudomonas aeruginosa (strain ATCC 15692 / PAO1 / 1C / PRS 101 / LMG 12228) GN=phzF1 PE=3 SV=2	1	2	2
sp|Q9HWC8|RL7_PSEAE	sp|O82850|RS2_PSEAE			>sp|O82850|RS2_PSEAE 30S ribosomal protein S2 OS=Pseudomonas aeruginosa (strain ATCC 15692 / PAO1 / 1C / PRS 101 / LMG 12228) GN=rpsB PE=3 SV=2	1	3	3
sp|Q9HWD1|RS7_PSEAE	sp|O82851|EFTS_PSEAE			>sp|O82851|EFTS_PSEAE Elongation factor Ts OS=Pseudomonas aeruginosa (strain ATCC 15692 / PAO1 / 1C / PRS 101 / LMG 12228) GN=tsf PE=3 SV=1	1	4	4
sp|Q9HWE2|RL16_PSEAE	sp|O86428|ILVE_PSEAE			>sp|O86428|ILVE_PSEAE Branched-chain-amino-acid aminotransferase OS=Pseudomonas aeruginosa (strain ATCC 15692 / PAO1 / 1C / PRS 101 / LMG 12228) GN=ilvE PE=1 SV=2	1	2	2
sp|Q9HWE7|RL5_PSEAE	sp|P04739|FMPO_PSEAE			>sp|P04739|FMPO_PSEAE Fimbrial protein OS=Pseudomonas aeruginosa (strain ATCC 15692 / PAO1 / 1C / PRS 101 / LMG 12228) GN=pilA PE=1 SV=1	1	4	4
sp|Q9HWE8|RS14_PSEAE	sp|P05384|DBHB_PSEAE			>sp|P05384|DBHB_PSEAE DNA-binding protein HU-beta OS=Pseudomonas aeruginosa (strain ATCC 15692 / PAO1 / 1C / PRS 101 / LMG 12228) GN=hupB PE=1 SV=3	1	2	2
sp|Q9HWZ6|IPYR_PSEAE	sp|P08280|RECA_PSEAE			>sp|P08280|RECA_PSEAE Protein RecA OS=Pseudomonas aeruginosa (strain ATCC 15692 / PAO1 / 1C / PRS 101 / LMG 12228) GN=recA PE=3 SV=1	1	1	1
sp|Q9HXL8|EX7L_PSEAE	sp|P08308|OTCC_PSEAE			>sp|P08308|OTCC_PSEAE Ornithine carbamoyltransferase, catabolic OS=Pseudomonas aeruginosa (strain ATCC 15692 / PAO1 / 1C / PRS 101 / LMG 12228) GN=arcB PE=1 SV=3	1	10	10
sp|Q9HYR3|Y3332_PSEAE	sp|P09591|EFTU_PSEAE			>sp|P09591|EFTU_PSEAE Elongation factor Tu OS=Pseudomonas aeruginosa (strain ATCC 15692 / PAO1 / 1C / PRS 101 / LMG 12228) GN=tufA PE=1 SV=2	1	13	13
sp|Q9HYR9|CLPP2_PSEAE	sp|P11221|OPRI_PSEAE			>sp|P11221|OPRI_PSEAE Major outer membrane lipoprotein OS=Pseudomonas aeruginosa (strain ATCC 15692 / PAO1 / 1C / PRS 101 / LMG 12228) GN=oprI PE=3 SV=1	1	2	2
sp|Q9I165|TREA_PSEAE	sp|P13794|PORF_PSEAE			>sp|P13794|PORF_PSEAE Outer membrane porin F OS=Pseudomonas aeruginosa (strain ATCC 15692 / PAO1 / 1C / PRS 101 / LMG 12228) GN=oprF PE=1 SV=1	1	6	6
sp|Q9I2U1|CLPP1_PSEAE	sp|P13981|ARCA_PSEAE			>sp|P13981|ARCA_PSEAE Arginine deiminase OS=Pseudomonas aeruginosa (strain ATCC 15692 / PAO1 / 1C / PRS 101 / LMG 12228) GN=arcA PE=1 SV=2	1	17	17
sp|Q9I3C5|HTPG_PSEAE	sp|P13982|ARCC_PSEAE			>sp|P13982|ARCC_PSEAE Carbamate kinase OS=Pseudomonas aeruginosa (strain ATCC 15692 / PAO1 / 1C / PRS 101 / LMG 12228) GN=arcC PE=3 SV=1	1	5	5
sp|Q9I4W3|DAPA_PSEAE	sp|P14165|CISY_PSEAE			>sp|P14165|CISY_PSEAE Citrate synthase OS=Pseudomonas aeruginosa (strain ATCC 15692 / PAO1 / 1C / PRS 101 / LMG 12228) GN=gltA PE=3 SV=2	1	4	4
sp|Q9I617|BIOF_PSEAE	sp|P15276|ALGP_PSEAE			>sp|P15276|ALGP_PSEAE Transcriptional regulatory protein AlgP OS=Pseudomonas aeruginosa (strain ATCC 15692 / PAO1 / 1C / PRS 101 / LMG 12228) GN=algP PE=4 SV=2	1	1	1
sp|Q9S508|PHZB2_PSEAE	sp|P26276|ALGC_PSEAE			>sp|P26276|ALGC_PSEAE Phosphomannomutase/phosphoglucomutase OS=Pseudomonas aeruginosa (strain ATCC 15692 / PAO1 / 1C / PRS 101 / LMG 12228) GN=algC PE=1 SV=4	1	1	1
tr|G3XD72|G3XD72_PSEAE	sp|P26480|RPOD_PSEAE			>sp|P26480|RPOD_PSEAE RNA polymerase sigma factor RpoD OS=Pseudomonas aeruginosa (strain ATCC 15692 / PAO1 / 1C / PRS 101 / LMG 12228) GN=rpoD PE=3 SV=1	1	1	1
tr|Q9HTM0|Q9HTM0_PSEAE	sp|P28810|MMSA_PSEAE			>sp|P28810|MMSA_PSEAE Methylmalonate-semialdehyde dehydrogenase [acylating] OS=Pseudomonas aeruginosa (strain ATCC 15692 / PAO1 / 1C / PRS 101 / LMG 12228) GN=mmsA PE=1 SV=2	1	1	1
tr|Q9HTU9|Q9HTU9_PSEAE	sp|P30718|CH60_PSEAE			>sp|P30718|CH60_PSEAE 60 kDa chaperonin OS=Pseudomonas aeruginosa (strain ATCC 15692 / PAO1 / 1C / PRS 101 / LMG 12228) GN=groL PE=1 SV=3	1	20	20
tr|Q9HU11|Q9HU11_PSEAE	sp|P32722|PORD_PSEAE			>sp|P32722|PORD_PSEAE Porin D OS=Pseudomonas aeruginosa (strain ATCC 15692 / PAO1 / 1C / PRS 101 / LMG 12228) GN=oprD PE=1 SV=1	1	2	2
tr|Q9HU23|Q9HU23_PSEAE	sp|P37798|ACCC_PSEAE			>sp|P37798|ACCC_PSEAE Biotin carboxylase OS=Pseudomonas aeruginosa (strain ATCC 15692 / PAO1 / 1C / PRS 101 / LMG 12228) GN=accC PE=1 SV=1	1	6	6
tr|Q9HVF9|Q9HVF9_PSEAE	sp|P37799|BCCP_PSEAE			>sp|P37799|BCCP_PSEAE Biotin carboxyl carrier protein of acetyl-CoA carboxylase OS=Pseudomonas aeruginosa (strain ATCC 15692 / PAO1 / 1C / PRS 101 / LMG 12228) GN=accB PE=3 SV=1	1	4	4
tr|Q9HXW4|Q9HXW4_PSEAE	sp|P38100|CARB_PSEAE			>sp|P38100|CARB_PSEAE Carbamoyl-phosphate synthase large chain OS=Pseudomonas aeruginosa (strain ATCC 15692 / PAO1 / 1C / PRS 101 / LMG 12228) GN=carB PE=3 SV=3	1	7	7
tr|Q9I124|Q9I124_PSEAE	sp|P43336|PHHC_PSEAE			>sp|P43336|PHHC_PSEAE Aromatic-amino-acid aminotransferase OS=Pseudomonas aeruginosa (strain ATCC 15692 / PAO1 / 1C / PRS 101 / LMG 12228) GN=phhC PE=3 SV=2	1	3	3
tr|Q9I140|Q9I140_PSEAE	sp|P47203|FTSA_PSEAE			>sp|P47203|FTSA_PSEAE Cell division protein FtsA OS=Pseudomonas aeruginosa (strain ATCC 15692 / PAO1 / 1C / PRS 101 / LMG 12228) GN=ftsA PE=3 SV=2	1	1	1
tr|Q9I1E8|Q9I1E8_PSEAE	sp|P47204|FTSZ_PSEAE			>sp|P47204|FTSZ_PSEAE Cell division protein FtsZ OS=Pseudomonas aeruginosa (strain ATCC 15692 / PAO1 / 1C / PRS 101 / LMG 12228) GN=ftsZ PE=1 SV=2	1	2	2
tr|Q9I1H5|Q9I1H5_PSEAE	sp|P48247|GSA_PSEAE			>sp|P48247|GSA_PSEAE Glutamate-1-semialdehyde 2,1-aminomutase OS=Pseudomonas aeruginosa (strain ATCC 15692 / PAO1 / 1C / PRS 101 / LMG 12228) GN=hemL PE=1 SV=2	1	2	2
tr|Q9I1U4|Q9I1U4_PSEAE	sp|P53593|SUCC_PSEAE			>sp|P53593|SUCC_PSEAE Succinyl-CoA ligase [ADP-forming] subunit beta OS=Pseudomonas aeruginosa (strain ATCC 15692 / PAO1 / 1C / PRS 101 / LMG 12228) GN=sucC PE=3 SV=2	1	11	11
tr|Q9I2J2|Q9I2J2_PSEAE	sp|P53641|SODF_PSEAE			>sp|P53641|SODF_PSEAE Superoxide dismutase [Fe] OS=Pseudomonas aeruginosa (strain ATCC 15692 / PAO1 / 1C / PRS 101 / LMG 12228) GN=sodB PE=3 SV=3	1	3	3
tr|Q9I2R5|Q9I2R5_PSEAE	sp|P57112|STHA_PSEAE			>sp|P57112|STHA_PSEAE Soluble pyridine nucleotide transhydrogenase OS=Pseudomonas aeruginosa (strain ATCC 15692 / PAO1 / 1C / PRS 101 / LMG 12228) GN=sthA PE=1 SV=2	1	3	3
tr|Q9I585|Q9I585_PSEAE	sp|P57668|TPX_PSEAE			>sp|P57668|TPX_PSEAE Probable thiol peroxidase OS=Pseudomonas aeruginosa (strain ATCC 15692 / PAO1 / 1C / PRS 101 / LMG 12228) GN=tpx PE=3 SV=1	1	2	2
tr|Q9I5F4|Q9I5F4_PSEAE	sp|P72173|AAT_PSEAE			>sp|P72173|AAT_PSEAE Aspartate aminotransferase OS=Pseudomonas aeruginosa (strain ATCC 15692 / PAO1 / 1C / PRS 101 / LMG 12228) GN=aspC PE=3 SV=2	1	9	9
tr|Q9I6A1|Q9I6A1_PSEAE	sp|Q51342|PUR1_PSEAE			>sp|Q51342|PUR1_PSEAE Amidophosphoribosyltransferase OS=Pseudomonas aeruginosa (strain ATCC 15692 / PAO1 / 1C / PRS 101 / LMG 12228) GN=purF PE=3 SV=3	1	1	1
	sp|Q51422|SYDND_PSEAE			>sp|Q51422|SYDND_PSEAE Aspartate--tRNA(Asp/Asn) ligase OS=Pseudomonas aeruginosa (strain ATCC 15692 / PAO1 / 1C / PRS 101 / LMG 12228) GN=aspS PE=1 SV=2	1	3	3
	sp|Q51561|RPOB_PSEAE			>sp|Q51561|RPOB_PSEAE DNA-directed RNA polymerase subunit beta OS=Pseudomonas aeruginosa (strain ATCC 15692 / PAO1 / 1C / PRS 101 / LMG 12228) GN=rpoB PE=3 SV=2	1	23	23
	sp|Q51567|SUCD_PSEAE			>sp|Q51567|SUCD_PSEAE Succinyl-CoA ligase [ADP-forming] subunit alpha OS=Pseudomonas aeruginosa (strain ATCC 15692 / PAO1 / 1C / PRS 101 / LMG 12228) GN=sucD PE=3 SV=2	1	8	8
	sp|Q59636|NDK_PSEAE			>sp|Q59636|NDK_PSEAE Nucleoside diphosphate kinase OS=Pseudomonas aeruginosa (strain ATCC 15692 / PAO1 / 1C / PRS 101 / LMG 12228) GN=ndk PE=3 SV=2	1	3	3
	sp|Q59637|ODP1_PSEAE			>sp|Q59637|ODP1_PSEAE Pyruvate dehydrogenase E1 component OS=Pseudomonas aeruginosa (strain ATCC 15692 / PAO1 / 1C / PRS 101 / LMG 12228) GN=aceE PE=3 SV=2	1	19	19
	sp|Q59638|ODP2_PSEAE			>sp|Q59638|ODP2_PSEAE Dihydrolipoyllysine-residue acetyltransferase component of pyruvate dehydrogenase complex OS=Pseudomonas aeruginosa (strain ATCC 15692 / PAO1 / 1C / PRS 101 / LMG 12228) GN=aceF PE=2 SV=2	1	11	11
	sp|Q9HT16|ATPF_PSEAE			>sp|Q9HT16|ATPF_PSEAE ATP synthase subunit b OS=Pseudomonas aeruginosa (strain ATCC 15692 / PAO1 / 1C / PRS 101 / LMG 12228) GN=atpF PE=3 SV=1	1	3	3
	sp|Q9HT18|ATPA_PSEAE			>sp|Q9HT18|ATPA_PSEAE ATP synthase subunit alpha OS=Pseudomonas aeruginosa (strain ATCC 15692 / PAO1 / 1C / PRS 101 / LMG 12228) GN=atpA PE=3 SV=1	1	12	12
	sp|Q9HT19|ATPG_PSEAE			>sp|Q9HT19|ATPG_PSEAE ATP synthase gamma chain OS=Pseudomonas aeruginosa (strain ATCC 15692 / PAO1 / 1C / PRS 101 / LMG 12228) GN=atpG PE=3 SV=1	1	2	2
	sp|Q9HT20|ATPB_PSEAE			>sp|Q9HT20|ATPB_PSEAE ATP synthase subunit beta OS=Pseudomonas aeruginosa (strain ATCC 15692 / PAO1 / 1C / PRS 101 / LMG 12228) GN=atpD PE=3 SV=1	1	13	13
	sp|Q9HT21|ATPE_PSEAE			>sp|Q9HT21|ATPE_PSEAE ATP synthase epsilon chain OS=Pseudomonas aeruginosa (strain ATCC 15692 / PAO1 / 1C / PRS 101 / LMG 12228) GN=atpC PE=3 SV=1	1	3	3
	sp|Q9HT95|ATSE4_PSEAE			>sp|Q9HT95|ATSE4_PSEAE Acetyltransferase PA5475 OS=Pseudomonas aeruginosa (strain ATCC 15692 / PAO1 / 1C / PRS 101 / LMG 12228) GN=PA5475 PE=3 SV=1	1	2	2
	sp|Q9HTD7|ASPA_PSEAE			>sp|Q9HTD7|ASPA_PSEAE Aspartate ammonia-lyase OS=Pseudomonas aeruginosa (strain ATCC 15692 / PAO1 / 1C / PRS 101 / LMG 12228) GN=aspA PE=3 SV=1	1	4	4
	sp|Q9HTN8|RL28_PSEAE			>sp|Q9HTN8|RL28_PSEAE 50S ribosomal protein L28 OS=Pseudomonas aeruginosa (strain ATCC 15692 / PAO1 / 1C / PRS 101 / LMG 12228) GN=rpmB PE=3 SV=1	1	1	1
	sp|Q9HTQ0|DADA1_PSEAE			>sp|Q9HTQ0|DADA1_PSEAE D-amino acid dehydrogenase 1 OS=Pseudomonas aeruginosa (strain ATCC 15692 / PAO1 / 1C / PRS 101 / LMG 12228) GN=dadA1 PE=1 SV=1	1	4	4
	sp|Q9HTZ7|PCKA_PSEAE			>sp|Q9HTZ7|PCKA_PSEAE Phosphoenolpyruvate carboxykinase [ATP] OS=Pseudomonas aeruginosa (strain ATCC 15692 / PAO1 / 1C / PRS 101 / LMG 12228) GN=pckA PE=3 SV=1	1	3	3
	sp|Q9HU65|GLNA_PSEAE			>sp|Q9HU65|GLNA_PSEAE Glutamine synthetase OS=Pseudomonas aeruginosa (strain ATCC 15692 / PAO1 / 1C / PRS 101 / LMG 12228) GN=glnA PE=1 SV=1	1	4	4
	sp|Q9HUC8|SYR_PSEAE			>sp|Q9HUC8|SYR_PSEAE Arginine--tRNA ligase OS=Pseudomonas aeruginosa (strain ATCC 15692 / PAO1 / 1C / PRS 101 / LMG 12228) GN=argS PE=3 SV=1	1	2	2
	sp|Q9HUM0|HFQ_PSEAE			>sp|Q9HUM0|HFQ_PSEAE RNA-binding protein Hfq OS=Pseudomonas aeruginosa (strain ATCC 15692 / PAO1 / 1C / PRS 101 / LMG 12228) GN=hfq PE=1 SV=1	1	1	1
	sp|Q9HUM6|PURA_PSEAE			>sp|Q9HUM6|PURA_PSEAE Adenylosuccinate synthetase OS=Pseudomonas aeruginosa (strain ATCC 15692 / PAO1 / 1C / PRS 101 / LMG 12228) GN=purA PE=3 SV=1	1	4	4
	sp|Q9HUM9|RS6_PSEAE			>sp|Q9HUM9|RS6_PSEAE 30S ribosomal protein S6 OS=Pseudomonas aeruginosa (strain ATCC 15692 / PAO1 / 1C / PRS 101 / LMG 12228) GN=rpsF PE=3 SV=1	1	1	1
	sp|Q9HV43|DNAK_PSEAE			>sp|Q9HV43|DNAK_PSEAE Chaperone protein DnaK OS=Pseudomonas aeruginosa (strain ATCC 15692 / PAO1 / 1C / PRS 101 / LMG 12228) GN=dnaK PE=3 SV=1	1	11	11
	sp|Q9HV50|GLMM_PSEAE			>sp|Q9HV50|GLMM_PSEAE Phosphoglucosamine mutase OS=Pseudomonas aeruginosa (strain ATCC 15692 / PAO1 / 1C / PRS 101 / LMG 12228) GN=glmM PE=3 SV=1	1	1	1
	sp|Q9HV51|TPIS_PSEAE			>sp|Q9HV51|TPIS_PSEAE Triosephosphate isomerase OS=Pseudomonas aeruginosa (strain ATCC 15692 / PAO1 / 1C / PRS 101 / LMG 12228) GN=tpiA PE=3 SV=1	1	1	1
	sp|Q9HV55|IF2_PSEAE			>sp|Q9HV55|IF2_PSEAE Translation initiation factor IF-2 OS=Pseudomonas aeruginosa (strain ATCC 15692 / PAO1 / 1C / PRS 101 / LMG 12228) GN=infB PE=3 SV=1	1	4	4
	sp|Q9HV59|PNP_PSEAE			>sp|Q9HV59|PNP_PSEAE Polyribonucleotide nucleotidyltransferase OS=Pseudomonas aeruginosa (strain ATCC 15692 / PAO1 / 1C / PRS 101 / LMG 12228) GN=pnp PE=3 SV=1	1	8	8
	sp|Q9HVA2|ILVC_PSEAE			>sp|Q9HVA2|ILVC_PSEAE Ketol-acid reductoisomerase OS=Pseudomonas aeruginosa (strain ATCC 15692 / PAO1 / 1C / PRS 101 / LMG 12228) GN=ilvC PE=1 SV=1	1	3	3
	sp|Q9HVC4|RL25_PSEAE			>sp|Q9HVC4|RL25_PSEAE 50S ribosomal protein L25 OS=Pseudomonas aeruginosa (strain ATCC 15692 / PAO1 / 1C / PRS 101 / LMG 12228) GN=rplY PE=3 SV=1	1	3	3
	sp|Q9HVC5|KPRS_PSEAE			>sp|Q9HVC5|KPRS_PSEAE Ribose-phosphate pyrophosphokinase OS=Pseudomonas aeruginosa (strain ATCC 15692 / PAO1 / 1C / PRS 101 / LMG 12228) GN=prs PE=3 SV=1	1	1	1
	sp|Q9HVF1|MQO2_PSEAE			>sp|Q9HVF1|MQO2_PSEAE Probable malate:quinone oxidoreductase 2 OS=Pseudomonas aeruginosa (strain ATCC 15692 / PAO1 / 1C / PRS 101 / LMG 12228) GN=mqo2 PE=3 SV=1	1	1	1
	sp|Q9HVI7|GLYA3_PSEAE;sp|Q9I138|GLYA2_PSEAE			>sp|Q9HVI7|GLYA3_PSEAE Serine hydroxymethyltransferase 3 OS=Pseudomonas aeruginosa (strain ATCC 15692 / PAO1 / 1C / PRS 101 / LMG 12228) GN=glyA2 PE=3 SV=1	2	3	3
	sp|Q9HVL6|RL21_PSEAE			>sp|Q9HVL6|RL21_PSEAE 50S ribosomal protein L21 OS=Pseudomonas aeruginosa (strain ATCC 15692 / PAO1 / 1C / PRS 101 / LMG 12228) GN=rplU PE=3 SV=1	1	2	2
	sp|Q9HVM4|SYI_PSEAE			>sp|Q9HVM4|SYI_PSEAE Isoleucine--tRNA ligase OS=Pseudomonas aeruginosa (strain ATCC 15692 / PAO1 / 1C / PRS 101 / LMG 12228) GN=ileS PE=3 SV=1	1	4	4
	sp|Q9HVN5|CLPB_PSEAE			>sp|Q9HVN5|CLPB_PSEAE Chaperone protein ClpB OS=Pseudomonas aeruginosa (strain ATCC 15692 / PAO1 / 1C / PRS 101 / LMG 12228) GN=clpB PE=3 SV=1	1	3	1
	sp|Q9HVT8|GATA_PSEAE			>sp|Q9HVT8|GATA_PSEAE Glutamyl-tRNA(Gln) amidotransferase subunit A OS=Pseudomonas aeruginosa (strain ATCC 15692 / PAO1 / 1C / PRS 101 / LMG 12228) GN=gatA PE=1 SV=1	1	2	2
	sp|Q9HVV3|Y4465_PSEAE			>sp|Q9HVV3|Y4465_PSEAE Nucleotide-binding protein PA4465 OS=Pseudomonas aeruginosa (strain ATCC 15692 / PAO1 / 1C / PRS 101 / LMG 12228) GN=PA4465 PE=3 SV=1	1	1	1
	sp|Q9HVY3|RS9_PSEAE			>sp|Q9HVY3|RS9_PSEAE 30S ribosomal protein S9 OS=Pseudomonas aeruginosa (strain ATCC 15692 / PAO1 / 1C / PRS 101 / LMG 12228) GN=rpsI PE=3 SV=1	1	1	1
	sp|Q9HW02|MURC_PSEAE			>sp|Q9HW02|MURC_PSEAE UDP-N-acetylmuramate--L-alanine ligase OS=Pseudomonas aeruginosa (strain ATCC 15692 / PAO1 / 1C / PRS 101 / LMG 12228) GN=murC PE=3 SV=1	1	1	1
	sp|Q9HW04|ARGJ_PSEAE			>sp|Q9HW04|ARGJ_PSEAE Arginine biosynthesis bifunctional protein ArgJ OS=Pseudomonas aeruginosa (strain ATCC 15692 / PAO1 / 1C / PRS 101 / LMG 12228) GN=argJ PE=3 SV=1	1	2	2
	sp|Q9HW11|Y4395_PSEAE			>sp|Q9HW11|Y4395_PSEAE UPF0234 protein PA4395 OS=Pseudomonas aeruginosa (strain ATCC 15692 / PAO1 / 1C / PRS 101 / LMG 12228) GN=PA4395 PE=3 SV=1	1	1	1
	sp|Q9HWC5|RL11_PSEAE			>sp|Q9HWC5|RL11_PSEAE 50S ribosomal protein L11 OS=Pseudomonas aeruginosa (strain ATCC 15692 / PAO1 / 1C / PRS 101 / LMG 12228) GN=rplK PE=3 SV=1	1	2	2
	sp|Q9HWC7|RL10_PSEAE			>sp|Q9HWC7|RL10_PSEAE 50S ribosomal protein L10 OS=Pseudomonas aeruginosa (strain ATCC 15692 / PAO1 / 1C / PRS 101 / LMG 12228) GN=rplJ PE=3 SV=1	1	3	3
	sp|Q9HWC8|RL7_PSEAE			>sp|Q9HWC8|RL7_PSEAE 50S ribosomal protein L7/L12 OS=Pseudomonas aeruginosa (strain ATCC 15692 / PAO1 / 1C / PRS 101 / LMG 12228) GN=rplL PE=3 SV=1	1	1	1
	sp|Q9HWC9|RPOC_PSEAE			>sp|Q9HWC9|RPOC_PSEAE DNA-directed RNA polymerase subunit beta OS=Pseudomonas aeruginosa (strain ATCC 15692 / PAO1 / 1C / PRS 101 / LMG 12228) GN=rpoC PE=3 SV=1	1	20	20
	sp|Q9HWD0|RS12_PSEAE			>sp|Q9HWD0|RS12_PSEAE 30S ribosomal protein S12 OS=Pseudomonas aeruginosa (strain ATCC 15692 / PAO1 / 1C / PRS 101 / LMG 12228) GN=rpsL PE=3 SV=1	1	1	1
	sp|Q9HWD1|RS7_PSEAE			>sp|Q9HWD1|RS7_PSEAE 30S ribosomal protein S7 OS=Pseudomonas aeruginosa (strain ATCC 15692 / PAO1 / 1C / PRS 101 / LMG 12228) GN=rpsG PE=3 SV=1	1	2	2
	sp|Q9HWD2|EFG1_PSEAE;sp|Q9I244|EFG2_PSEAE			>sp|Q9HWD2|EFG1_PSEAE Elongation factor G 1 OS=Pseudomonas aeruginosa (strain ATCC 15692 / PAO1 / 1C / PRS 101 / LMG 12228) GN=fusA PE=1 SV=1	2	20	20
	sp|Q9HWD5|RL3_PSEAE			>sp|Q9HWD5|RL3_PSEAE 50S ribosomal protein L3 OS=Pseudomonas aeruginosa (strain ATCC 15692 / PAO1 / 1C / PRS 101 / LMG 12228) GN=rplC PE=3 SV=1	1	3	3
	sp|Q9HWD8|RL2_PSEAE			>sp|Q9HWD8|RL2_PSEAE 50S ribosomal protein L2 OS=Pseudomonas aeruginosa (strain ATCC 15692 / PAO1 / 1C / PRS 101 / LMG 12228) GN=rplB PE=3 SV=1	1	4	4
	sp|Q9HWE0|RL22_PSEAE			>sp|Q9HWE0|RL22_PSEAE 50S ribosomal protein L22 OS=Pseudomonas aeruginosa (strain ATCC 15692 / PAO1 / 1C / PRS 101 / LMG 12228) GN=rplV PE=3 SV=1	1	3	3
	sp|Q9HWE1|RS3_PSEAE			>sp|Q9HWE1|RS3_PSEAE 30S ribosomal protein S3 OS=Pseudomonas aeruginosa (strain ATCC 15692 / PAO1 / 1C / PRS 101 / LMG 12228) GN=rpsC PE=3 SV=1	1	2	2
	sp|Q9HWE2|RL16_PSEAE			>sp|Q9HWE2|RL16_PSEAE 50S ribosomal protein L16 OS=Pseudomonas aeruginosa (strain ATCC 15692 / PAO1 / 1C / PRS 101 / LMG 12228) GN=rplP PE=3 SV=1	1	3	3
	sp|Q9HWE5|RL14_PSEAE			>sp|Q9HWE5|RL14_PSEAE 50S ribosomal protein L14 OS=Pseudomonas aeruginosa (strain ATCC 15692 / PAO1 / 1C / PRS 101 / LMG 12228) GN=rplN PE=3 SV=1	1	3	3
	sp|Q9HWE7|RL5_PSEAE			>sp|Q9HWE7|RL5_PSEAE 50S ribosomal protein L5 OS=Pseudomonas aeruginosa (strain ATCC 15692 / PAO1 / 1C / PRS 101 / LMG 12228) GN=rplE PE=3 SV=1	1	2	2
	sp|Q9HWE8|RS14_PSEAE			>sp|Q9HWE8|RS14_PSEAE 30S ribosomal protein S14 OS=Pseudomonas aeruginosa (strain ATCC 15692 / PAO1 / 1C / PRS 101 / LMG 12228) GN=rpsN PE=3 SV=1	1	1	1
	sp|Q9HWE9|RS8_PSEAE			>sp|Q9HWE9|RS8_PSEAE 30S ribosomal protein S8 OS=Pseudomonas aeruginosa (strain ATCC 15692 / PAO1 / 1C / PRS 101 / LMG 12228) GN=rpsH PE=3 SV=1	1	2	2
	sp|Q9HWF1|RL18_PSEAE			>sp|Q9HWF1|RL18_PSEAE 50S ribosomal protein L18 OS=Pseudomonas aeruginosa (strain ATCC 15692 / PAO1 / 1C / PRS 101 / LMG 12228) GN=rplR PE=3 SV=1	1	2	2
	sp|Q9HWF2|RS5_PSEAE			>sp|Q9HWF2|RS5_PSEAE 30S ribosomal protein S5 OS=Pseudomonas aeruginosa (strain ATCC 15692 / PAO1 / 1C / PRS 101 / LMG 12228) GN=rpsE PE=3 SV=1	1	3	3
	sp|Q9HWF7|RS13_PSEAE			>sp|Q9HWF7|RS13_PSEAE 30S ribosomal protein S13 OS=Pseudomonas aeruginosa (strain ATCC 15692 / PAO1 / 1C / PRS 101 / LMG 12228) GN=rpsM PE=3 SV=1	1	3	3
	sp|Q9HWF8|RS11_PSEAE			>sp|Q9HWF8|RS11_PSEAE 30S ribosomal protein S11 OS=Pseudomonas aeruginosa (strain ATCC 15692 / PAO1 / 1C / PRS 101 / LMG 12228) GN=rpsK PE=3 SV=1	1	1	1
	sp|Q9HWZ6|IPYR_PSEAE			>sp|Q9HWZ6|IPYR_PSEAE Inorganic pyrophosphatase OS=Pseudomonas aeruginosa (strain ATCC 15692 / PAO1 / 1C / PRS 101 / LMG 12228) GN=ppa PE=1 SV=1	1	2	2
	sp|Q9HX33|SYL_PSEAE			>sp|Q9HX33|SYL_PSEAE Leucine--tRNA ligase OS=Pseudomonas aeruginosa (strain ATCC 15692 / PAO1 / 1C / PRS 101 / LMG 12228) GN=leuS PE=3 SV=1	1	2	2
	sp|Q9HXH0|SYV_PSEAE			>sp|Q9HXH0|SYV_PSEAE Valine--tRNA ligase OS=Pseudomonas aeruginosa (strain ATCC 15692 / PAO1 / 1C / PRS 101 / LMG 12228) GN=valS PE=1 SV=1	1	1	1
	sp|Q9HXL8|EX7L_PSEAE			>sp|Q9HXL8|EX7L_PSEAE Exodeoxyribonuclease 7 large subunit OS=Pseudomonas aeruginosa (strain ATCC 15692 / PAO1 / 1C / PRS 101 / LMG 12228) GN=xseA PE=3 SV=1	1	1	1
	sp|Q9HXM6|GUAA_PSEAE			>sp|Q9HXM6|GUAA_PSEAE GMP synthase [glutamine-hydrolyzing] OS=Pseudomonas aeruginosa (strain ATCC 15692 / PAO1 / 1C / PRS 101 / LMG 12228) GN=guaA PE=3 SV=1	1	4	4
	sp|Q9HXN2|PUR4_PSEAE			>sp|Q9HXN2|PUR4_PSEAE Phosphoribosylformylglycinamidine synthase OS=Pseudomonas aeruginosa (strain ATCC 15692 / PAO1 / 1C / PRS 101 / LMG 12228) GN=purL PE=3 SV=1	1	1	1
	sp|Q9HXZ2|ACCA_PSEAE			>sp|Q9HXZ2|ACCA_PSEAE Acetyl-coenzyme A carboxylase carboxyl transferase subunit alpha OS=Pseudomonas aeruginosa (strain ATCC 15692 / PAO1 / 1C / PRS 101 / LMG 12228) GN=accA PE=1 SV=1	1	1	1
	sp|Q9HXZ4|PYRG_PSEAE			>sp|Q9HXZ4|PYRG_PSEAE CTP synthase OS=Pseudomonas aeruginosa (strain ATCC 15692 / PAO1 / 1C / PRS 101 / LMG 12228) GN=pyrG PE=3 SV=1	1	3	3
	sp|Q9HXZ5|ENO_PSEAE			>sp|Q9HXZ5|ENO_PSEAE Enolase OS=Pseudomonas aeruginosa (strain ATCC 15692 / PAO1 / 1C / PRS 101 / LMG 12228) GN=eno PE=3 SV=1	1	6	6
	sp|Q9HYC7|SYM_PSEAE			>sp|Q9HYC7|SYM_PSEAE Methionine--tRNA ligase OS=Pseudomonas aeruginosa (strain ATCC 15692 / PAO1 / 1C / PRS 101 / LMG 12228) GN=metG PE=3 SV=1	1	1	1
	sp|Q9HYR2|FABH_PSEAE			>sp|Q9HYR2|FABH_PSEAE 3-oxoacyl-[acyl-carrier-protein] synthase 3 OS=Pseudomonas aeruginosa (strain ATCC 15692 / PAO1 / 1C / PRS 101 / LMG 12228) GN=fabH PE=1 SV=1	1	1	1
	sp|Q9HYR3|Y3332_PSEAE			>sp|Q9HYR3|Y3332_PSEAE Uncharacterized PhzA/B-like protein PA3332 OS=Pseudomonas aeruginosa (strain ATCC 15692 / PAO1 / 1C / PRS 101 / LMG 12228) GN=PA3332 PE=1 SV=1	1	3	3
	sp|Q9HYR9|CLPP2_PSEAE			>sp|Q9HYR9|CLPP2_PSEAE ATP-dependent Clp protease proteolytic subunit 2 OS=Pseudomonas aeruginosa (strain ATCC 15692 / PAO1 / 1C / PRS 101 / LMG 12228) GN=clpP2 PE=3 SV=1	1	1	1
	sp|Q9HZ71|RS1_PSEAE			>sp|Q9HZ71|RS1_PSEAE 30S ribosomal protein S1 OS=Pseudomonas aeruginosa (strain ATCC 15692 / PAO1 / 1C / PRS 101 / LMG 12228) GN=rpsA PE=3 SV=1	1	14	14
	sp|Q9HZ76|WBPE_PSEAE			>sp|Q9HZ76|WBPE_PSEAE UDP-2-acetamido-2-deoxy-3-oxo-D-glucuronate aminotransferase OS=Pseudomonas aeruginosa (strain ATCC 15692 / PAO1 / 1C / PRS 101 / LMG 12228) GN=wbpE PE=1 SV=1	1	5	5
	sp|Q9HZA7|ACCD_PSEAE			>sp|Q9HZA7|ACCD_PSEAE Acetyl-coenzyme A carboxylase carboxyl transferase subunit beta OS=Pseudomonas aeruginosa (strain ATCC 15692 / PAO1 / 1C / PRS 101 / LMG 12228) GN=accD PE=1 SV=1	1	2	2
	sp|Q9HZE0|DHE2_PSEAE			>sp|Q9HZE0|DHE2_PSEAE NAD-specific glutamate dehydrogenase OS=Pseudomonas aeruginosa (strain ATCC 15692 / PAO1 / 1C / PRS 101 / LMG 12228) GN=gdhB PE=1 SV=1	1	21	21
	sp|Q9HZJ2|FADB_PSEAE			>sp|Q9HZJ2|FADB_PSEAE Fatty acid oxidation complex subunit alpha OS=Pseudomonas aeruginosa (strain ATCC 15692 / PAO1 / 1C / PRS 101 / LMG 12228) GN=fadB PE=3 SV=1	1	4	4
	sp|Q9HZP5|ETFD_PSEAE			>sp|Q9HZP5|ETFD_PSEAE Electron transfer flavoprotein-ubiquinone oxidoreductase OS=Pseudomonas aeruginosa (strain ATCC 15692 / PAO1 / 1C / PRS 101 / LMG 12228) GN=PA2953 PE=1 SV=1	1	1	1
	sp|Q9HZP6|ETFB_PSEAE			>sp|Q9HZP6|ETFB_PSEAE Electron transfer flavoprotein subunit beta OS=Pseudomonas aeruginosa (strain ATCC 15692 / PAO1 / 1C / PRS 101 / LMG 12228) GN=etfB PE=3 SV=1	1	3	3
	sp|Q9HZZ2|EFP_PSEAE			>sp|Q9HZZ2|EFP_PSEAE Elongation factor P OS=Pseudomonas aeruginosa (strain ATCC 15692 / PAO1 / 1C / PRS 101 / LMG 12228) GN=efp PE=1 SV=1	1	4	4
	sp|Q9I047|TAL_PSEAE			>sp|Q9I047|TAL_PSEAE Transaldolase OS=Pseudomonas aeruginosa (strain ATCC 15692 / PAO1 / 1C / PRS 101 / LMG 12228) GN=tal PE=3 SV=1	1	1	1
	sp|Q9I0J5|NUOH_PSEAE			>sp|Q9I0J5|NUOH_PSEAE NADH-quinone oxidoreductase subunit H OS=Pseudomonas aeruginosa (strain ATCC 15692 / PAO1 / 1C / PRS 101 / LMG 12228) GN=nuoH PE=3 SV=1	1	1	1
	sp|Q9I0J6|NUOG_PSEAE			>sp|Q9I0J6|NUOG_PSEAE NADH-quinone oxidoreductase subunit G OS=Pseudomonas aeruginosa (strain ATCC 15692 / PAO1 / 1C / PRS 101 / LMG 12228) GN=nuoG PE=3 SV=1	1	9	9
	sp|Q9I0J7|NUOF_PSEAE			>sp|Q9I0J7|NUOF_PSEAE NADH-quinone oxidoreductase subunit F OS=Pseudomonas aeruginosa (strain ATCC 15692 / PAO1 / 1C / PRS 101 / LMG 12228) GN=nuoF PE=3 SV=1	1	1	1
	sp|Q9I0J9|NUOCD_PSEAE			>sp|Q9I0J9|NUOCD_PSEAE NADH-quinone oxidoreductase subunit C/D OS=Pseudomonas aeruginosa (strain ATCC 15692 / PAO1 / 1C / PRS 101 / LMG 12228) GN=nuoC PE=3 SV=1	1	3	3
	sp|Q9I0K0|NUOB_PSEAE			>sp|Q9I0K0|NUOB_PSEAE NADH-quinone oxidoreductase subunit B OS=Pseudomonas aeruginosa (strain ATCC 15692 / PAO1 / 1C / PRS 101 / LMG 12228) GN=nuoB PE=3 SV=1	1	1	1
	sp|Q9I0K4|ACEA_PSEAE			>sp|Q9I0K4|ACEA_PSEAE Isocitrate lyase OS=Pseudomonas aeruginosa (strain ATCC 15692 / PAO1 / 1C / PRS 101 / LMG 12228) GN=PA2634 PE=1 SV=1	1	9	9
	sp|Q9I137|GCSP1_PSEAE			>sp|Q9I137|GCSP1_PSEAE Glycine dehydrogenase (decarboxylating) 1 OS=Pseudomonas aeruginosa (strain ATCC 15692 / PAO1 / 1C / PRS 101 / LMG 12228) GN=gcvP1 PE=3 SV=1	1	1	1
	sp|Q9I165|TREA_PSEAE			>sp|Q9I165|TREA_PSEAE Periplasmic trehalase OS=Pseudomonas aeruginosa (strain ATCC 15692 / PAO1 / 1C / PRS 101 / LMG 12228) GN=treA PE=3 SV=1	1	1	1
	sp|Q9I1L9|DLDH1_PSEAE			>sp|Q9I1L9|DLDH1_PSEAE Dihydrolipoyl dehydrogenase OS=Pseudomonas aeruginosa (strain ATCC 15692 / PAO1 / 1C / PRS 101 / LMG 12228) GN=lpdV PE=1 SV=1	1	1	1
	sp|Q9I1S2|HCNB_PSEAE			>sp|Q9I1S2|HCNB_PSEAE Hydrogen cyanide synthase subunit HcnB OS=Pseudomonas aeruginosa (strain ATCC 15692 / PAO1 / 1C / PRS 101 / LMG 12228) GN=hcnB PE=1 SV=1	1	3	3
	sp|Q9I291|GALU_PSEAE			>sp|Q9I291|GALU_PSEAE UTP--glucose-1-phosphate uridylyltransferase OS=Pseudomonas aeruginosa (strain ATCC 15692 / PAO1 / 1C / PRS 101 / LMG 12228) GN=galU PE=3 SV=1	1	1	1
	sp|Q9I2A8|ATOB_PSEAE			>sp|Q9I2A8|ATOB_PSEAE Acetyl-CoA acetyltransferase OS=Pseudomonas aeruginosa (strain ATCC 15692 / PAO1 / 1C / PRS 101 / LMG 12228) GN=atoB PE=3 SV=1	1	4	4
	sp|Q9I2U1|CLPP1_PSEAE			>sp|Q9I2U1|CLPP1_PSEAE ATP-dependent Clp protease proteolytic subunit 1 OS=Pseudomonas aeruginosa (strain ATCC 15692 / PAO1 / 1C / PRS 101 / LMG 12228) GN=clpP1 PE=3 SV=1	1	1	1
	sp|Q9I2V5|ACNB_PSEAE			>sp|Q9I2V5|ACNB_PSEAE Aconitate hydratase B OS=Pseudomonas aeruginosa (strain ATCC 15692 / PAO1 / 1C / PRS 101 / LMG 12228) GN=acnB PE=3 SV=1	1	20	20
	sp|Q9I3C5|HTPG_PSEAE			>sp|Q9I3C5|HTPG_PSEAE Chaperone protein HtpG OS=Pseudomonas aeruginosa (strain ATCC 15692 / PAO1 / 1C / PRS 101 / LMG 12228) GN=htpG PE=3 SV=1	1	1	1
	sp|Q9I3D1|DLDH2_PSEAE			>sp|Q9I3D1|DLDH2_PSEAE Dihydrolipoyl dehydrogenase OS=Pseudomonas aeruginosa (strain ATCC 15692 / PAO1 / 1C / PRS 101 / LMG 12228) GN=lpdG PE=3 SV=1	1	11	11
	sp|Q9I3D2|ODO2_PSEAE			>sp|Q9I3D2|ODO2_PSEAE Dihydrolipoyllysine-residue succinyltransferase component of 2-oxoglutarate dehydrogenase complex OS=Pseudomonas aeruginosa (strain ATCC 15692 / PAO1 / 1C / PRS 101 / LMG 12228) GN=sucB PE=3 SV=1	1	5	5
	sp|Q9I3F5|ACNA_PSEAE			>sp|Q9I3F5|ACNA_PSEAE Aconitate hydratase A OS=Pseudomonas aeruginosa (strain ATCC 15692 / PAO1 / 1C / PRS 101 / LMG 12228) GN=acnA PE=3 SV=1	1	10	10
	sp|Q9I4W3|DAPA_PSEAE			>sp|Q9I4W3|DAPA_PSEAE 4-hydroxy-tetrahydrodipicolinate synthase OS=Pseudomonas aeruginosa (strain ATCC 15692 / PAO1 / 1C / PRS 101 / LMG 12228) GN=dapA PE=1 SV=1	1	1	1
	sp|Q9I4Z4|PAL_PSEAE			>sp|Q9I4Z4|PAL_PSEAE Peptidoglycan-associated lipoprotein OS=Pseudomonas aeruginosa (strain ATCC 15692 / PAO1 / 1C / PRS 101 / LMG 12228) GN=pal PE=3 SV=1	1	2	2
	sp|Q9I558|ACSA1_PSEAE			>sp|Q9I558|ACSA1_PSEAE Acetyl-coenzyme A synthetase 1 OS=Pseudomonas aeruginosa (strain ATCC 15692 / PAO1 / 1C / PRS 101 / LMG 12228) GN=acsA1 PE=3 SV=1	1	3	3
	sp|Q9I576|HPPD_PSEAE			>sp|Q9I576|HPPD_PSEAE 4-hydroxyphenylpyruvate dioxygenase OS=Pseudomonas aeruginosa (strain ATCC 15692 / PAO1 / 1C / PRS 101 / LMG 12228) GN=hpd PE=3 SV=1	1	1	1
	sp|Q9I5Y1|ALF_PSEAE			>sp|Q9I5Y1|ALF_PSEAE Fructose-bisphosphate aldolase OS=Pseudomonas aeruginosa (strain ATCC 15692 / PAO1 / 1C / PRS 101 / LMG 12228) GN=fba PE=3 SV=1	1	1	1
	sp|Q9I5Y4|PGK_PSEAE			>sp|Q9I5Y4|PGK_PSEAE Phosphoglycerate kinase OS=Pseudomonas aeruginosa (strain ATCC 15692 / PAO1 / 1C / PRS 101 / LMG 12228) GN=pgk PE=3 SV=1	1	1	1
	sp|Q9I5Z0|METK_PSEAE			>sp|Q9I5Z0|METK_PSEAE S-adenosylmethionine synthase OS=Pseudomonas aeruginosa (strain ATCC 15692 / PAO1 / 1C / PRS 101 / LMG 12228) GN=metK PE=3 SV=1	1	5	5
	sp|Q9I617|BIOF_PSEAE			>sp|Q9I617|BIOF_PSEAE 8-amino-7-oxononanoate synthase OS=Pseudomonas aeruginosa (strain ATCC 15692 / PAO1 / 1C / PRS 101 / LMG 12228) GN=bioF PE=3 SV=1	1	1	1
	sp|Q9I636|MASZ_PSEAE			>sp|Q9I636|MASZ_PSEAE Malate synthase G OS=Pseudomonas aeruginosa (strain ATCC 15692 / PAO1 / 1C / PRS 101 / LMG 12228) GN=glcB PE=3 SV=1	1	2	2
	sp|Q9I685|SAHH_PSEAE			>sp|Q9I685|SAHH_PSEAE Adenosylhomocysteinase OS=Pseudomonas aeruginosa (strain ATCC 15692 / PAO1 / 1C / PRS 101 / LMG 12228) GN=ahcY PE=3 SV=1	1	11	11
	sp|Q9I6M4|DAVT_PSEAE			>sp|Q9I6M4|DAVT_PSEAE 5-aminovalerate aminotransferase DavT OS=Pseudomonas aeruginosa (strain ATCC 15692 / PAO1 / 1C / PRS 101 / LMG 12228) GN=davT PE=1 SV=1	1	8	8
	sp|Q9I6M5|DAVD_PSEAE			>sp|Q9I6M5|DAVD_PSEAE Glutarate-semialdehyde dehydrogenase DavD OS=Pseudomonas aeruginosa (strain ATCC 15692 / PAO1 / 1C / PRS 101 / LMG 12228) GN=davD PE=1 SV=1	1	4	4
	sp|Q9I742|CLPV1_PSEAE			>sp|Q9I742|CLPV1_PSEAE Protein ClpV1 OS=Pseudomonas aeruginosa (strain ATCC 15692 / PAO1 / 1C / PRS 101 / LMG 12228) GN=clpV1 PE=1 SV=1	1	5	5
	sp|Q9I747|HCP1_PSEAE			>sp|Q9I747|HCP1_PSEAE Protein hcp1 OS=Pseudomonas aeruginosa (strain ATCC 15692 / PAO1 / 1C / PRS 101 / LMG 12228) GN=hcp1 PE=1 SV=1	1	2	2
	sp|Q9I7B8|SYGB_PSEAE			>sp|Q9I7B8|SYGB_PSEAE Glycine--tRNA ligase beta subunit OS=Pseudomonas aeruginosa (strain ATCC 15692 / PAO1 / 1C / PRS 101 / LMG 12228) GN=glyS PE=3 SV=1	1	2	2
	sp|Q9I7C2|GYRB_PSEAE			>sp|Q9I7C2|GYRB_PSEAE DNA gyrase subunit B OS=Pseudomonas aeruginosa (strain ATCC 15692 / PAO1 / 1C / PRS 101 / LMG 12228) GN=gyrB PE=3 SV=1	1	2	2
	sp|Q9LCT3|SECA_PSEAE			>sp|Q9LCT3|SECA_PSEAE Protein translocase subunit SecA OS=Pseudomonas aeruginosa (strain ATCC 15692 / PAO1 / 1C / PRS 101 / LMG 12228) GN=secA PE=3 SV=1	1	3	3
	sp|Q9S508|PHZB2_PSEAE			>sp|Q9S508|PHZB2_PSEAE Phenazine biosynthesis protein PhzB 2 OS=Pseudomonas aeruginosa (strain ATCC 15692 / PAO1 / 1C / PRS 101 / LMG 12228) GN=phzB2 PE=1 SV=1	1	2	2
	sp|Q9X2T1|THIO_PSEAE			>sp|Q9X2T1|THIO_PSEAE Thioredoxin OS=Pseudomonas aeruginosa (strain ATCC 15692 / PAO1 / 1C / PRS 101 / LMG 12228) GN=trxA PE=3 SV=1	1	1	1
	tr|G3XCT6|G3XCT6_PSEAE			>tr|G3XCT6|G3XCT6_PSEAE Probable two-component sensor OS=Pseudomonas aeruginosa (strain ATCC 15692 / PAO1 / 1C / PRS 101 / LMG 12228) GN=PA1458 PE=4 SV=1	1	2	2
	tr|G3XD72|G3XD72_PSEAE			>tr|G3XD72|G3XD72_PSEAE Probable purine-binding chemotaxis protein OS=Pseudomonas aeruginosa (strain ATCC 15692 / PAO1 / 1C / PRS 101 / LMG 12228) GN=PA1464 PE=4 SV=1	1	1	1
	tr|Q9HTD1|Q9HTD1_PSEAE			>tr|Q9HTD1|Q9HTD1_PSEAE Probable transcarboxylase subunit OS=Pseudomonas aeruginosa (strain ATCC 15692 / PAO1 / 1C / PRS 101 / LMG 12228) GN=PA5435 PE=4 SV=1	1	20	20
	tr|Q9HTD9|Q9HTD9_PSEAE			>tr|Q9HTD9|Q9HTD9_PSEAE Alcohol dehydrogenase OS=Pseudomonas aeruginosa (strain ATCC 15692 / PAO1 / 1C / PRS 101 / LMG 12228) GN=adhA PE=1 SV=1	1	5	5
	tr|Q9HTM0|Q9HTM0_PSEAE			>tr|Q9HTM0|Q9HTM0_PSEAE Guanosine-3,5-bis(Diphosphate) 3-pyrophosphohydrolase OS=Pseudomonas aeruginosa (strain ATCC 15692 / PAO1 / 1C / PRS 101 / LMG 12228) GN=spoT PE=3 SV=1	1	1	1
	tr|Q9HTP2|Q9HTP2_PSEAE			>tr|Q9HTP2|Q9HTP2_PSEAE Probable aldehyde dehydrogenase OS=Pseudomonas aeruginosa (strain ATCC 15692 / PAO1 / 1C / PRS 101 / LMG 12228) GN=PA5312 PE=3 SV=1	1	4	4
	tr|Q9HTU9|Q9HTU9_PSEAE			>tr|Q9HTU9|Q9HTU9_PSEAE Uncharacterized protein OS=Pseudomonas aeruginosa (strain ATCC 15692 / PAO1 / 1C / PRS 101 / LMG 12228) GN=PA5245 PE=4 SV=1	1	1	1
	tr|Q9HU11|Q9HU11_PSEAE			>tr|Q9HU11|Q9HU11_PSEAE Uncharacterized protein OS=Pseudomonas aeruginosa (strain ATCC 15692 / PAO1 / 1C / PRS 101 / LMG 12228) GN=PA5178 PE=4 SV=1	1	2	2
	tr|Q9HU23|Q9HU23_PSEAE			>tr|Q9HU23|Q9HU23_PSEAE dTDP-4-dehydrorhamnose reductase OS=Pseudomonas aeruginosa (strain ATCC 15692 / PAO1 / 1C / PRS 101 / LMG 12228) GN=rmlD PE=4 SV=1	1	1	1
	tr|Q9HUD3|Q9HUD3_PSEAE			>tr|Q9HUD3|Q9HUD3_PSEAE Malic enzyme OS=Pseudomonas aeruginosa (strain ATCC 15692 / PAO1 / 1C / PRS 101 / LMG 12228) GN=PA5046 PE=4 SV=1	1	3	3
	tr|Q9HUM7|Q9HUM7_PSEAE			>tr|Q9HUM7|Q9HUM7_PSEAE Ribonuclease R OS=Pseudomonas aeruginosa (strain ATCC 15692 / PAO1 / 1C / PRS 101 / LMG 12228) GN=rnr PE=3 SV=1	1	2	2
	tr|Q9HV54|Q9HV54_PSEAE			>tr|Q9HV54|Q9HV54_PSEAE Transcription termination/antitermination protein NusA OS=Pseudomonas aeruginosa (strain ATCC 15692 / PAO1 / 1C / PRS 101 / LMG 12228) GN=nusA PE=3 SV=1	1	2	2
	tr|Q9HV96|Q9HV96_PSEAE			>tr|Q9HV96|Q9HV96_PSEAE Uncharacterized protein OS=Pseudomonas aeruginosa (strain ATCC 15692 / PAO1 / 1C / PRS 101 / LMG 12228) GN=PA4701 PE=4 SV=1	1	1	1
	tr|Q9HVF9|Q9HVF9_PSEAE			>tr|Q9HVF9|Q9HVF9_PSEAE Uncharacterized protein OS=Pseudomonas aeruginosa (strain ATCC 15692 / PAO1 / 1C / PRS 101 / LMG 12228) GN=PA4632 PE=3 SV=1	1	2	2
	tr|Q9HVJ1|Q9HVJ1_PSEAE			>tr|Q9HVJ1|Q9HVJ1_PSEAE Probable ATP-binding component of ABC transporter OS=Pseudomonas aeruginosa (strain ATCC 15692 / PAO1 / 1C / PRS 101 / LMG 12228) GN=PA4595 PE=4 SV=1	1	4	4
	tr|Q9HVS8|Q9HVS8_PSEAE			>tr|Q9HVS8|Q9HVS8_PSEAE RoxR OS=Pseudomonas aeruginosa (strain ATCC 15692 / PAO1 / 1C / PRS 101 / LMG 12228) GN=roxR PE=4 SV=1	1	1	1
	tr|Q9HVU0|Q9HVU0_PSEAE			>tr|Q9HVU0|Q9HVU0_PSEAE Rod shape-determining protein MreB OS=Pseudomonas aeruginosa (strain ATCC 15692 / PAO1 / 1C / PRS 101 / LMG 12228) GN=mreB PE=4 SV=1	1	3	3
	tr|Q9HVY4|Q9HVY4_PSEAE			>tr|Q9HVY4|Q9HVY4_PSEAE Ubiquinol-cytochrome c reductase iron-sulfur subunit OS=Pseudomonas aeruginosa (strain ATCC 15692 / PAO1 / 1C / PRS 101 / LMG 12228) GN=PA4431 PE=4 SV=1	1	3	3
	tr|Q9HVY6|Q9HVY6_PSEAE			>tr|Q9HVY6|Q9HVY6_PSEAE Probable cytochrome c1 OS=Pseudomonas aeruginosa (strain ATCC 15692 / PAO1 / 1C / PRS 101 / LMG 12228) GN=PA4429 PE=4 SV=1	1	2	2
	tr|Q9HW15|Q9HW15_PSEAE			>tr|Q9HW15|Q9HW15_PSEAE Probable short-chain dehydrogenase OS=Pseudomonas aeruginosa (strain ATCC 15692 / PAO1 / 1C / PRS 101 / LMG 12228) GN=speA PE=4 SV=1	1	2	2
	tr|Q9HW49|Q9HW49_PSEAE			>tr|Q9HW49|Q9HW49_PSEAE Uncharacterized protein OS=Pseudomonas aeruginosa (strain ATCC 15692 / PAO1 / 1C / PRS 101 / LMG 12228) GN=PA4352 PE=3 SV=1	1	7	7
	tr|Q9HW68|Q9HW68_PSEAE			>tr|Q9HW68|Q9HW68_PSEAE Probable fumarase OS=Pseudomonas aeruginosa (strain ATCC 15692 / PAO1 / 1C / PRS 101 / LMG 12228) GN=PA4333 PE=4 SV=1	1	2	2
	tr|Q9HW72|Q9HW72_PSEAE			>tr|Q9HW72|Q9HW72_PSEAE Pyruvate kinase OS=Pseudomonas aeruginosa (strain ATCC 15692 / PAO1 / 1C / PRS 101 / LMG 12228) GN=pykA PE=3 SV=1	1	4	4
	tr|Q9HWP8|Q9HWP8_PSEAE			>tr|Q9HWP8|Q9HWP8_PSEAE Cytochrome c oxidase subunit (Cbb3-type) OS=Pseudomonas aeruginosa (strain ATCC 15692 / PAO1 / 1C / PRS 101 / LMG 12228) GN=PA4133 PE=3 SV=1	1	1	1
	tr|Q9HWQ0|Q9HWQ0_PSEAE			>tr|Q9HWQ0|Q9HWQ0_PSEAE Probable iron-sulfur protein OS=Pseudomonas aeruginosa (strain ATCC 15692 / PAO1 / 1C / PRS 101 / LMG 12228) GN=PA4131 PE=4 SV=1	1	4	4
	tr|Q9HWW7|Q9HWW7_PSEAE			>tr|Q9HWW7|Q9HWW7_PSEAE Probable thioredoxin OS=Pseudomonas aeruginosa (strain ATCC 15692 / PAO1 / 1C / PRS 101 / LMG 12228) GN=PA4061 PE=4 SV=1	1	1	1
	tr|Q9HX05|Q9HX05_PSEAE;tr|Q9I2C4|Q9I2C4_PSEAE			>tr|Q9HX05|Q9HX05_PSEAE Probable aldehyde dehydrogenase OS=Pseudomonas aeruginosa (strain ATCC 15692 / PAO1 / 1C / PRS 101 / LMG 12228) GN=PA4022 PE=3 SV=1;>tr|Q9I2C4|Q9I2C4_PSEAE NAD+ dependent aldehyde dehydrogenase ExaC OS=Pseudomonas aeruginosa (strain	2	4	4
	tr|Q9HXM5|Q9HXM5_PSEAE			>tr|Q9HXM5|Q9HXM5_PSEAE Inosine-5-monophosphate dehydrogenase OS=Pseudomonas aeruginosa (strain ATCC 15692 / PAO1 / 1C / PRS 101 / LMG 12228) GN=guaB PE=1 SV=1	1	3	3
	tr|Q9HXW4|Q9HXW4_PSEAE			>tr|Q9HXW4|Q9HXW4_PSEAE Probable Resistance-Nodulation-Cell Division (RND) efflux transporter OS=Pseudomonas aeruginosa (strain ATCC 15692 / PAO1 / 1C / PRS 101 / LMG 12228) GN=PA3676 PE=3 SV=1	1	1	1
	tr|Q9HY13|Q9HY13_PSEAE			>tr|Q9HY13|Q9HY13_PSEAE Uncharacterized protein OS=Pseudomonas aeruginosa (strain ATCC 15692 / PAO1 / 1C / PRS 101 / LMG 12228) GN=PA3613 PE=4 SV=1	1	5	5
	tr|Q9HY77|Q9HY77_PSEAE			>tr|Q9HY77|Q9HY77_PSEAE Glutaredoxin OS=Pseudomonas aeruginosa (strain ATCC 15692 / PAO1 / 1C / PRS 101 / LMG 12228) GN=PA3533 PE=3 SV=1	1	3	3
	tr|Q9HY79|Q9HY79_PSEAE			>tr|Q9HY79|Q9HY79_PSEAE Ferroxidase OS=Pseudomonas aeruginosa (strain ATCC 15692 / PAO1 / 1C / PRS 101 / LMG 12228) GN=bfrB PE=1 SV=1	1	1	1
	tr|Q9HY81|Q9HY81_PSEAE			>tr|Q9HY81|Q9HY81_PSEAE Probable peroxidase OS=Pseudomonas aeruginosa (strain ATCC 15692 / PAO1 / 1C / PRS 101 / LMG 12228) GN=PA3529 PE=1 SV=1	1	5	5
	tr|Q9HYR5|Q9HYR5_PSEAE			>tr|Q9HYR5|Q9HYR5_PSEAE Probable short chain dehydrogenase OS=Pseudomonas aeruginosa (strain ATCC 15692 / PAO1 / 1C / PRS 101 / LMG 12228) GN=PA3330 PE=4 SV=1	1	1	1
	tr|Q9HYR6|Q9HYR6_PSEAE			>tr|Q9HYR6|Q9HYR6_PSEAE Uncharacterized protein OS=Pseudomonas aeruginosa (strain ATCC 15692 / PAO1 / 1C / PRS 101 / LMG 12228) GN=PA3329 PE=4 SV=1	1	2	2
	tr|Q9HYR7|Q9HYR7_PSEAE			>tr|Q9HYR7|Q9HYR7_PSEAE Probable FAD-dependent monooxygenase OS=Pseudomonas aeruginosa (strain ATCC 15692 / PAO1 / 1C / PRS 101 / LMG 12228) GN=PA3328 PE=4 SV=1	1	2	2
	tr|Q9HYR8|Q9HYR8_PSEAE			>tr|Q9HYR8|Q9HYR8_PSEAE Probable non-ribosomal peptide synthetase OS=Pseudomonas aeruginosa (strain ATCC 15692 / PAO1 / 1C / PRS 101 / LMG 12228) GN=PA3327 PE=4 SV=1	1	4	4
	tr|Q9HYT5|Q9HYT5_PSEAE			>tr|Q9HYT5|Q9HYT5_PSEAE Uncharacterized protein OS=Pseudomonas aeruginosa (strain ATCC 15692 / PAO1 / 1C / PRS 101 / LMG 12228) GN=PA3309 PE=3 SV=1	1	6	6
	tr|Q9HYZ6|Q9HYZ6_PSEAE			>tr|Q9HYZ6|Q9HYZ6_PSEAE Site-determining protein OS=Pseudomonas aeruginosa (strain ATCC 15692 / PAO1 / 1C / PRS 101 / LMG 12228) GN=minD PE=3 SV=1	1	4	4
	tr|Q9HZK4|Q9HZK4_PSEAE			>tr|Q9HZK4|Q9HZK4_PSEAE Glyceraldehyde-3-phosphate dehydrogenase OS=Pseudomonas aeruginosa (strain ATCC 15692 / PAO1 / 1C / PRS 101 / LMG 12228) GN=PA3001 PE=3 SV=1	1	9	9
	tr|Q9I028|Q9I028_PSEAE			>tr|Q9I028|Q9I028_PSEAE Probable acyl-CoA dehydrogenase OS=Pseudomonas aeruginosa (strain ATCC 15692 / PAO1 / 1C / PRS 101 / LMG 12228) GN=PA2815 PE=4 SV=1	1	1	1
	tr|Q9I0F9|Q9I0F9_PSEAE			>tr|Q9I0F9|Q9I0F9_PSEAE Uncharacterized protein OS=Pseudomonas aeruginosa (strain ATCC 15692 / PAO1 / 1C / PRS 101 / LMG 12228) GN=PA2679 PE=4 SV=1	1	1	1
	tr|Q9I0L4|Q9I0L4_PSEAE			>tr|Q9I0L4|Q9I0L4_PSEAE Isocitrate dehydrogenase OS=Pseudomonas aeruginosa (strain ATCC 15692 / PAO1 / 1C / PRS 101 / LMG 12228) GN=idh PE=4 SV=1	1	11	11
	tr|Q9I0L5|Q9I0L5_PSEAE			>tr|Q9I0L5|Q9I0L5_PSEAE Isocitrate dehydrogenase [NADP] OS=Pseudomonas aeruginosa (strain ATCC 15692 / PAO1 / 1C / PRS 101 / LMG 12228) GN=icd PE=3 SV=1	1	15	15
	tr|Q9I0T1|Q9I0T1_PSEAE			>tr|Q9I0T1|Q9I0T1_PSEAE Probable acyl-CoA thiolase OS=Pseudomonas aeruginosa (strain ATCC 15692 / PAO1 / 1C / PRS 101 / LMG 12228) GN=PA2553 PE=3 SV=1	1	10	10
	tr|Q9I124|Q9I124_PSEAE			>tr|Q9I124|Q9I124_PSEAE Uncharacterized protein OS=Pseudomonas aeruginosa (strain ATCC 15692 / PAO1 / 1C / PRS 101 / LMG 12228) GN=PA2458 PE=4 SV=1	1	1	1
	tr|Q9I140|Q9I140_PSEAE			>tr|Q9I140|Q9I140_PSEAE Aminomethyltransferase OS=Pseudomonas aeruginosa (strain ATCC 15692 / PAO1 / 1C / PRS 101 / LMG 12228) GN=gcvT2 PE=3 SV=1	1	1	1
	tr|Q9I1E8|Q9I1E8_PSEAE			>tr|Q9I1E8|Q9I1E8_PSEAE Uncharacterized protein OS=Pseudomonas aeruginosa (strain ATCC 15692 / PAO1 / 1C / PRS 101 / LMG 12228) GN=PA2330 PE=4 SV=1	1	1	1
	tr|Q9I1H3|Q9I1H3_PSEAE			>tr|Q9I1H3|Q9I1H3_PSEAE AmbE OS=Pseudomonas aeruginosa (strain ATCC 15692 / PAO1 / 1C / PRS 101 / LMG 12228) GN=ambE PE=4 SV=1	1	5	5
	tr|Q9I1H5|Q9I1H5_PSEAE			>tr|Q9I1H5|Q9I1H5_PSEAE Chitinase OS=Pseudomonas aeruginosa (strain ATCC 15692 / PAO1 / 1C / PRS 101 / LMG 12228) GN=chiC PE=3 SV=1	1	2	2
	tr|Q9I1N7|Q9I1N7_PSEAE			>tr|Q9I1N7|Q9I1N7_PSEAE PslB OS=Pseudomonas aeruginosa (strain ATCC 15692 / PAO1 / 1C / PRS 101 / LMG 12228) GN=pslB PE=3 SV=1	1	2	2
	tr|Q9I1U4|Q9I1U4_PSEAE			>tr|Q9I1U4|Q9I1U4_PSEAE Uncharacterized protein OS=Pseudomonas aeruginosa (strain ATCC 15692 / PAO1 / 1C / PRS 101 / LMG 12228) GN=PA2171 PE=4 SV=1	1	1	1
	tr|Q9I1Z6|Q9I1Z6_PSEAE			>tr|Q9I1Z6|Q9I1Z6_PSEAE Alcohol dehydrogenase (Zn-dependent) OS=Pseudomonas aeruginosa (strain ATCC 15692 / PAO1 / 1C / PRS 101 / LMG 12228) GN=PA2119 PE=3 SV=1	1	2	2
	tr|Q9I246|Q9I246_PSEAE			>tr|Q9I246|Q9I246_PSEAE Probable carbamoyl transferase OS=Pseudomonas aeruginosa (strain ATCC 15692 / PAO1 / 1C / PRS 101 / LMG 12228) GN=PA2069 PE=4 SV=1	1	5	5
	tr|Q9I297|Q9I297_PSEAE			>tr|Q9I297|Q9I297_PSEAE Methylcrotonyl-CoA carboxylase, beta-subunit OS=Pseudomonas aeruginosa (strain ATCC 15692 / PAO1 / 1C / PRS 101 / LMG 12228) GN=liuB PE=1 SV=1	1	1	1
	tr|Q9I299|Q9I299_PSEAE			>tr|Q9I299|Q9I299_PSEAE Methylcrotonyl-CoA carboxylase, alpha-subunit (Biotin-containing) OS=Pseudomonas aeruginosa (strain ATCC 15692 / PAO1 / 1C / PRS 101 / LMG 12228) GN=liuD PE=1 SV=1	1	5	5
	tr|Q9I2J2|Q9I2J2_PSEAE			>tr|Q9I2J2|Q9I2J2_PSEAE ECF sigma factor, FemI OS=Pseudomonas aeruginosa (strain ATCC 15692 / PAO1 / 1C / PRS 101 / LMG 12228) GN=femI PE=3 SV=1	1	1	1
	tr|Q9I2R2|Q9I2R2_PSEAE			>tr|Q9I2R2|Q9I2R2_PSEAE Probable oxidoreductase OS=Pseudomonas aeruginosa (strain ATCC 15692 / PAO1 / 1C / PRS 101 / LMG 12228) GN=PA1833 PE=4 SV=1	1	2	2
	tr|Q9I2R5|Q9I2R5_PSEAE			>tr|Q9I2R5|Q9I2R5_PSEAE Uncharacterized protein OS=Pseudomonas aeruginosa (strain ATCC 15692 / PAO1 / 1C / PRS 101 / LMG 12228) GN=PA1830 PE=4 SV=1	1	1	1
	tr|Q9I2V3|Q9I2V3_PSEAE			>tr|Q9I2V3|Q9I2V3_PSEAE Uncharacterized protein OS=Pseudomonas aeruginosa (strain ATCC 15692 / PAO1 / 1C / PRS 101 / LMG 12228) GN=PA1789 PE=1 SV=1	1	2	2
	tr|Q9I2W9|Q9I2W9_PSEAE			>tr|Q9I2W9|Q9I2W9_PSEAE Phosphoenolpyruvate synthase OS=Pseudomonas aeruginosa (strain ATCC 15692 / PAO1 / 1C / PRS 101 / LMG 12228) GN=ppsA PE=3 SV=1	1	10	10
	tr|Q9I2Z1|Q9I2Z1_PSEAE			>tr|Q9I2Z1|Q9I2Z1_PSEAE Uncharacterized protein OS=Pseudomonas aeruginosa (strain ATCC 15692 / PAO1 / 1C / PRS 101 / LMG 12228) GN=PA1746 PE=4 SV=1	1	1	1
	tr|Q9I3B2|Q9I3B2_PSEAE			>tr|Q9I3B2|Q9I3B2_PSEAE Beta-ketoacyl-ACP synthase I OS=Pseudomonas aeruginosa (strain ATCC 15692 / PAO1 / 1C / PRS 101 / LMG 12228) GN=fabB PE=3 SV=1	1	4	4
	tr|Q9I3D3|Q9I3D3_PSEAE			>tr|Q9I3D3|Q9I3D3_PSEAE 2-oxoglutarate dehydrogenase (E1 subunit) OS=Pseudomonas aeruginosa (strain ATCC 15692 / PAO1 / 1C / PRS 101 / LMG 12228) GN=sucA PE=4 SV=1	1	13	13
	tr|Q9I3D4|Q9I3D4_PSEAE			>tr|Q9I3D4|Q9I3D4_PSEAE Succinate dehydrogenase (B subunit) OS=Pseudomonas aeruginosa (strain ATCC 15692 / PAO1 / 1C / PRS 101 / LMG 12228) GN=sdhB PE=4 SV=1	1	4	4
	tr|Q9I3D5|Q9I3D5_PSEAE			>tr|Q9I3D5|Q9I3D5_PSEAE Succinate dehydrogenase flavoprotein subunit OS=Pseudomonas aeruginosa (strain ATCC 15692 / PAO1 / 1C / PRS 101 / LMG 12228) GN=sdhA PE=3 SV=1	1	10	10
	tr|Q9I3G0|Q9I3G0_PSEAE			>tr|Q9I3G0|Q9I3G0_PSEAE Cytochrome c oxidase, cbb3-type, CcoN subunit OS=Pseudomonas aeruginosa (strain ATCC 15692 / PAO1 / 1C / PRS 101 / LMG 12228) GN=ccoN2 PE=3 SV=1	1	2	2
	tr|Q9I3G1|Q9I3G1_PSEAE;tr|Q9I3G4|Q9I3G4_PSEAE			>tr|Q9I3G1|Q9I3G1_PSEAE Cytochrome c oxidase, cbb3-type, CcoO subunit OS=Pseudomonas aeruginosa (strain ATCC 15692 / PAO1 / 1C / PRS 101 / LMG 12228) GN=ccoO2 PE=4 SV=1	2	3	3
	tr|Q9I3G2|Q9I3G2_PSEAE			>tr|Q9I3G2|Q9I3G2_PSEAE Cbb3-type cytochrome c oxidase subunit OS=Pseudomonas aeruginosa (strain ATCC 15692 / PAO1 / 1C / PRS 101 / LMG 12228) GN=ccoP2 PE=3 SV=1	1	6	6
	tr|Q9I3G6|Q9I3G6_PSEAE			>tr|Q9I3G6|Q9I3G6_PSEAE Probable ferredoxin OS=Pseudomonas aeruginosa (strain ATCC 15692 / PAO1 / 1C / PRS 101 / LMG 12228) GN=PA1551 PE=4 SV=1	1	1	1
	tr|Q9I4I1|Q9I4I1_PSEAE			>tr|Q9I4I1|Q9I4I1_PSEAE Ribonucleoside-diphosphate reductase OS=Pseudomonas aeruginosa (strain ATCC 15692 / PAO1 / 1C / PRS 101 / LMG 12228) GN=nrdA PE=3 SV=1	1	3	3
	tr|Q9I4I2|Q9I4I2_PSEAE			>tr|Q9I4I2|Q9I4I2_PSEAE Ribonucleoside-diphosphate reductase subunit beta OS=Pseudomonas aeruginosa (strain ATCC 15692 / PAO1 / 1C / PRS 101 / LMG 12228) GN=nrdB PE=3 SV=1	1	3	3
	tr|Q9I4X1|Q9I4X1_PSEAE			>tr|Q9I4X1|Q9I4X1_PSEAE PqsC OS=Pseudomonas aeruginosa (strain ATCC 15692 / PAO1 / 1C / PRS 101 / LMG 12228) GN=pqsC PE=1 SV=1	1	1	1
	tr|Q9I585|Q9I585_PSEAE			>tr|Q9I585|Q9I585_PSEAE Uncharacterized protein OS=Pseudomonas aeruginosa (strain ATCC 15692 / PAO1 / 1C / PRS 101 / LMG 12228) GN=PA0856 PE=1 SV=1	1	1	1
	tr|Q9I5F4|Q9I5F4_PSEAE			>tr|Q9I5F4|Q9I5F4_PSEAE Probable transcriptional regulator OS=Pseudomonas aeruginosa (strain ATCC 15692 / PAO1 / 1C / PRS 101 / LMG 12228) GN=PA0784 PE=4 SV=1	1	2	2
	tr|Q9I5F6|Q9I5F6_PSEAE			>tr|Q9I5F6|Q9I5F6_PSEAE Bifunctional protein PutA OS=Pseudomonas aeruginosa (strain ATCC 15692 / PAO1 / 1C / PRS 101 / LMG 12228) GN=putA PE=3 SV=1	1	5	5
	tr|Q9I5F9|Q9I5F9_PSEAE			>tr|Q9I5F9|Q9I5F9_PSEAE Lon protease OS=Pseudomonas aeruginosa (strain ATCC 15692 / PAO1 / 1C / PRS 101 / LMG 12228) GN=lon PE=2 SV=1	1	1	1
	tr|Q9I5I4|Q9I5I4_PSEAE			>tr|Q9I5I4|Q9I5I4_PSEAE Probable enoyl-CoA hydratase/isomerase OS=Pseudomonas aeruginosa (strain ATCC 15692 / PAO1 / 1C / PRS 101 / LMG 12228) GN=PA0745 PE=3 SV=1	1	1	1
	tr|Q9I5U9|Q9I5U9_PSEAE			>tr|Q9I5U9|Q9I5U9_PSEAE Uncharacterized protein OS=Pseudomonas aeruginosa (strain ATCC 15692 / PAO1 / 1C / PRS 101 / LMG 12228) GN=PA0588 PE=4 SV=1	1	12	12
	tr|Q9I5Y8|Q9I5Y8_PSEAE			>tr|Q9I5Y8|Q9I5Y8_PSEAE Transketolase OS=Pseudomonas aeruginosa (strain ATCC 15692 / PAO1 / 1C / PRS 101 / LMG 12228) GN=tktA PE=1 SV=1	1	4	4
	tr|Q9I612|Q9I612_PSEAE			>tr|Q9I612|Q9I612_PSEAE Probable acyl-CoA dehydrogenase OS=Pseudomonas aeruginosa (strain ATCC 15692 / PAO1 / 1C / PRS 101 / LMG 12228) GN=PA0506 PE=3 SV=1	1	1	1
	tr|Q9I659|Q9I659_PSEAE			>tr|Q9I659|Q9I659_PSEAE Probable ClpA/B protease ATP binding subunit OS=Pseudomonas aeruginosa (strain ATCC 15692 / PAO1 / 1C / PRS 101 / LMG 12228) GN=PA0459 PE=4 SV=1	1	13	13
	tr|Q9I671|Q9I671_PSEAE			>tr|Q9I671|Q9I671_PSEAE Glutaryl-CoA dehydrogenase OS=Pseudomonas aeruginosa (strain ATCC 15692 / PAO1 / 1C / PRS 101 / LMG 12228) GN=gcdH PE=3 SV=1	1	4	4
	tr|Q9I687|Q9I687_PSEAE			>tr|Q9I687|Q9I687_PSEAE Methylenetetrahydrofolate reductase OS=Pseudomonas aeruginosa (strain ATCC 15692 / PAO1 / 1C / PRS 101 / LMG 12228) GN=metF PE=3 SV=1	1	1	1
	tr|Q9I6A1|Q9I6A1_PSEAE			>tr|Q9I6A1|Q9I6A1_PSEAE Cystathionine beta-synthase OS=Pseudomonas aeruginosa (strain ATCC 15692 / PAO1 / 1C / PRS 101 / LMG 12228) GN=PA0399 PE=4 SV=1	1	1	1
	tr|Q9I6H5|Q9I6H5_PSEAE			>tr|Q9I6H5|Q9I6H5_PSEAE D-3-phosphoglycerate dehydrogenase OS=Pseudomonas aeruginosa (strain ATCC 15692 / PAO1 / 1C / PRS 101 / LMG 12228) GN=serA PE=3 SV=1	1	3	3
	tr|Q9I6J2|Q9I6J2_PSEAE			>tr|Q9I6J2|Q9I6J2_PSEAE Putrescine aminotransferase OS=Pseudomonas aeruginosa (strain ATCC 15692 / PAO1 / 1C / PRS 101 / LMG 12228) GN=spuC PE=3 SV=1	1	2	2
	tr|Q9I6Z1|Q9I6Z1_PSEAE			>tr|Q9I6Z1|Q9I6Z1_PSEAE Uncharacterized protein OS=Pseudomonas aeruginosa (strain ATCC 15692 / PAO1 / 1C / PRS 101 / LMG 12228) GN=PA0141 PE=4 SV=1	1	1	1
	tr|Q9I6Z3|Q9I6Z3_PSEAE			>tr|Q9I6Z3|Q9I6Z3_PSEAE Alkyl hydroperoxide reductase subunit C OS=Pseudomonas aeruginosa (strain ATCC 15692 / PAO1 / 1C / PRS 101 / LMG 12228) GN=ahpC PE=4 SV=1	1	6	6
	tr|Q9I748|Q9I748_PSEAE			>tr|Q9I748|Q9I748_PSEAE Uncharacterized protein OS=Pseudomonas aeruginosa (strain ATCC 15692 / PAO1 / 1C / PRS 101 / LMG 12228) GN=PA0084 PE=4 SV=1	1	3	3

## Sheet: 3-2 proteinGroups C4HSL-1
Protein IDs	Majority protein IDs	Peptide counts (all)	Peptide counts (razor+unique)	Peptide counts (unique)	Fasta headers	Number of proteins	Peptides	Razor + unique peptides	Unique peptides	Sequence coverage [%]	Unique + razor sequence coverage [%]	Unique sequence coverage [%]	Mol. weight [kDa]	Sequence length	Sequence lengths	Q-value	Score	Intensity	MS/MS Count	Only identified by site	Reverse	Potential contaminant	id	Peptide IDs	Peptide is razor	Mod. peptide IDs	Evidence IDs	MS/MS IDs	Best MS/MS	Oxidation (M) site IDs	Oxidation (M) site positions
CON__P00761	CON__P00761	4	4	4	>P00761 SWISS-PROT:P00761|TRYP_PIG Trypsin - Sus scrofa (Pig).	1	4	4	4	25.1	25.1	25.1	24.409	231	231	0	57.523	611500000	58			+	0	517;637;725;1077	True;True;True;True	531;532;652;742;1099	893;894;895;896;1114;1115;1116;1117;1277;1278;1279;1907;1908	1714;1715;1716;1717;1718;1719;2124;2125;2126;2127;2128;2129;2130;2131;2132;2133;2134;2135;2136;2137;2138;2139;2140;2409;2410;2411;2412;2413;2414;2415;2416;2417;2418;2419;3723;3724;3725;3726;3727;3728;3729;3730;3731;3732;3733;3734;3735;3736;3737;3738;3739;3740;3741;3742;3743;3744;3745;3746;3747	1714;2130;2417;3738	0	94
CON__P04264;CON__ENSEMBL:ENSBTAP00000038253;CON__P35908;CON__Q9R0H5;CON__Q6NXH9;CON__Q8BGZ7;CON__P50446;CON__Q6IFZ6;CON__Q7Z794;CON__Q922U2;CON__Q5XQN5	CON__P04264	8;2;2;1;1;1;1;1;1;1;1	8;2;2;1;1;1;1;1;1;1;1	8;2;2;1;1;1;1;1;1;1;1	>P04264 SWISS-PROT:P04264 Tax_Id=9606 Gene_Symbol=KRT1 Keratin, type II cytoskeletal 1	11	8	8	8	14	14	14	66.017	644	644;606;645;524;539;551;553;572;578;580;601	0	77.896	66544000	15			+	1	324;485;693;940;946;964;1034;1207	True;True;True;True;True;True;True;True	337;499;709;961;967;986;1056;1231	585;586;846;847;1227;1228;1652;1665;1666;1695;1839;2139	1209;1210;1211;1212;1213;1637;1638;2327;2328;3221;3222;3246;3247;3302;3611;4158	1209;1637;2327;3221;3247;3302;3611;4158
CON__P13645;CON__P02535-1	CON__P13645;CON__P02535-1	5;3	5;3	5;3	>P13645 SWISS-PROT:P13645 Tax_Id=9606 Gene_Symbol=KRT10 Keratin, type I cytoskeletal 10;>P02535-1 SWISS-PROT:P02535-1 Tax_Id=10090 Gene_Symbol=Krt10 Isoform 1 of Keratin, type I cytoskeletal 10	2	5	5	5	9.3	9.3	9.3	59.51	593	593;570	0	29.424	12746000	10			+	2	85;627;895;963;1128	True;True;True;True;True	89;642;916;985;1150	163;164;165;1093;1094;1576;1694;2010	403;404;405;406;407;2071;2072;3098;3301;3903	404;2072;3098;3301;3903
CON__P35527	CON__P35527	2	2	2	>P35527 SWISS-PROT:P35527 Tax_Id=9606 Gene_Symbol=KRT9 Keratin, type I cytoskeletal 9	1	2	2	2	4.8	4.8	4.8	62.129	623	623	0	17.306	2905100	1			+	3	458;1161	True;True	472;1184	808;2065	1586;4028	1586;4028
CON__Streptavidin	CON__Streptavidin	4	4	4	>Streptavidin (S.avidinii)	1	4	4	4	43.1	43.1	43.1	16.622	160	160	0	128.24	2036500000	314			+	4	543;817;970;1220	True;True;True;True	558;837;992;1244	934;935;936;937;938;939;940;941;942;943;944;945;946;947;948;949;950;951;952;953;1439;1440;1441;1442;1443;1444;1445;1446;1447;1448;1449;1450;1705;1706;1707;1708;1709;1710;1711;1712;1713;1714;1715;1716;1717;1718;1719;1720;1721;1722;1723;1724;1725;1726;2159;2160;2161;2162;2163;2164;2165	1775;1776;1777;1778;1779;1780;1781;1782;1783;1784;1785;1786;1787;1788;1789;1790;1791;1792;1793;1794;1795;1796;1797;1798;1799;1800;1801;1802;1803;1804;1805;1806;1807;1808;1809;1810;1811;1812;1813;1814;2737;2738;2739;2740;2741;2742;2743;2744;2745;2746;2747;2748;2749;2750;2751;2752;2753;2754;2755;2756;2757;2758;2759;2760;2761;2762;2763;2764;2765;2766;2767;2768;2769;2770;2771;2772;2773;2774;2775;2776…	1797;2761;3319;4202
REV__tr|Q9HXW2|Q9HXW2_PSEAE	REV__tr|Q9HXW2|Q9HXW2_PSEAE	1	1	1	>tr|Q9HXW2|Q9HXW2_PSEAE Probable transcriptional regulator OS=Pseudomonas aeruginosa (strain ATCC 15692 / PAO1 / 1C / PRS 101 / LMG 12228) GN=PA3678 PE=4 SV=1	1	1	1	1	0	0	0	23.15	212	212	0.0080972	6.074	209730000	17		+		5	591	TRUE	606	1030;1031	1946;1947;1948;1949;1950;1951;1952;1953;1954;1955;1956;1957;1958;1959;1960;1961;1962	1948
REV__tr|Q9I0T1|Q9I0T1_PSEAE	REV__tr|Q9I0T1|Q9I0T1_PSEAE	1	1	1	>tr|Q9I0T1|Q9I0T1_PSEAE Probable acyl-CoA thiolase OS=Pseudomonas aeruginosa (strain ATCC 15692 / PAO1 / 1C / PRS 101 / LMG 12228) GN=PA2553 PE=3 SV=1	1	1	1	1	0	0	0	41.4	396	396	0.0042735	6.3938	8639000	1		+		6	393	TRUE	407	698	1391	1391
sp|G3XD01|WBPD_PSEAE	sp|G3XD01|WBPD_PSEAE	1	1	1	>sp|G3XD01|WBPD_PSEAE UDP-2-acetamido-3-amino-2,3-dideoxy-D-glucuronate N-acetyltransferase OS=Pseudomonas aeruginosa (strain ATCC 15692 / PAO1 / 1C / PRS 101 / LMG 12228) GN=wbpD PE=1 SV=1	1	1	1	1	11	11	11	20.562	191	191	0.0079365	5.9802	1952900	1				7	984	TRUE	1006	1750	3432	3432
sp|G3XD12|HCNC_PSEAE	sp|G3XD12|HCNC_PSEAE	3	3	3	>sp|G3XD12|HCNC_PSEAE Hydrogen cyanide synthase subunit HcnC OS=Pseudomonas aeruginosa (strain ATCC 15692 / PAO1 / 1C / PRS 101 / LMG 12228) GN=hcnC PE=1 SV=1	1	3	3	3	10.6	10.6	10.6	45.281	417	417	0	22.879	7570500	6				8	1008;1030;1245	True;True;True	1030;1052;1269	1800;1801;1833;2201	3558;3559;3560;3600;3601;4340	3558;3600;4340
sp|G3XD23|WBPB_PSEAE	sp|G3XD23|WBPB_PSEAE	5	5	5	>sp|G3XD23|WBPB_PSEAE UDP-N-acetyl-2-amino-2-deoxy-D-glucuronate oxidase OS=Pseudomonas aeruginosa (strain ATCC 15692 / PAO1 / 1C / PRS 101 / LMG 12228) GN=wbpB PE=1 SV=1	1	5	5	5	19.6	19.6	19.6	35.717	316	316	0	34.894	67577000	16				9	4;451;761;828;908	True;True;True;True;True	4;465;778;848;929	5;6;795;796;1335;1336;1468;1469;1600;1601	7;8;9;10;11;12;1568;1569;2518;2519;2520;2886;2887;3140;3141;3142	7;1569;2520;2886;3140
sp|G3XD61|WBPI_PSEAE	sp|G3XD61|WBPI_PSEAE	5	5	5	>sp|G3XD61|WBPI_PSEAE UDP-2,3-diacetamido-2,3-dideoxy-D-glucuronate 2-epimerase OS=Pseudomonas aeruginosa (strain ATCC 15692 / PAO1 / 1C / PRS 101 / LMG 12228) GN=wbpI PE=1 SV=1	1	5	5	5	24	24	24	38.907	354	354	0	41.643	9899000	7				10	151;575;788;1019;1138	True;True;True;True;True	160;590;805;1041;1160	280;1002;1379;1815;2025	598;1898;2610;2611;3579;3924;3925	598;1898;2610;3579;3925
sp|G3XD94|UGND_PSEAE	sp|G3XD94|UGND_PSEAE	8	8	8	>sp|G3XD94|UGND_PSEAE UDP-N-acetyl-D-glucosamine 6-dehydrogenase OS=Pseudomonas aeruginosa (strain ATCC 15692 / PAO1 / 1C / PRS 101 / LMG 12228) GN=wbpA PE=1 SV=1	1	8	8	8	22.2	22.2	22.2	48.155	436	436	0	59.498	36353000	13				11	137;162;244;284;317;686;781;1165	True;True;True;True;True;True;True;True	146;171;255;296;330;701;798;1188	257;299;300;450;519;520;576;1213;1368;2073;2074	565;624;625;980;1105;1106;1107;1198;2303;2595;4054;4055;4056	565;624;980;1105;1198;2303;2595;4055
sp|O50175|ASTB_PSEAE	sp|O50175|ASTB_PSEAE	1	1	1	>sp|O50175|ASTB_PSEAE N-succinylarginine dihydrolase OS=Pseudomonas aeruginosa (strain ATCC 15692 / PAO1 / 1C / PRS 101 / LMG 12228) GN=astB PE=3 SV=1	1	1	1	1	2.5	2.5	2.5	48.874	448	448	0	6.7427	0	1				12	989	TRUE	1011	1763	3478	3478
sp|O52759|RS4_PSEAE	sp|O52759|RS4_PSEAE	5	5	5	>sp|O52759|RS4_PSEAE 30S ribosomal protein S4 OS=Pseudomonas aeruginosa (strain ATCC 15692 / PAO1 / 1C / PRS 101 / LMG 12228) GN=rpsD PE=3 SV=2	1	5	5	5	28.2	28.2	28.2	23.277	206	206	0	43.448	68701000	16				13	75;580;622;720;911	True;True;True;True;True	79;595;637;737;932	147;148;1011;1084;1085;1270;1271;1605;1606	374;375;376;377;378;1913;2060;2061;2062;2396;2397;2398;2399;2400;3148;3149	374;1913;2060;2399;3148
sp|O52760|RPOA_PSEAE	sp|O52760|RPOA_PSEAE	9	9	9	>sp|O52760|RPOA_PSEAE DNA-directed RNA polymerase subunit alpha OS=Pseudomonas aeruginosa (strain ATCC 15692 / PAO1 / 1C / PRS 101 / LMG 12228) GN=rpoA PE=3 SV=2	1	9	9	9	35.7	35.7	35.7	36.649	333	333	0	69.296	53298000	21				14	40;363;459;565;717;749;802;1000;1179	True;True;True;True;True;True;True;True;True	42;377;473;580;734;766;819;1022;1203	80;649;650;809;810;983;984;1265;1266;1316;1399;1400;1782;2096;2097	203;204;1316;1317;1318;1587;1588;1858;1859;1860;2391;2392;2494;2495;2636;2637;2638;3507;4091;4092;4093	203;1316;1588;1859;2391;2494;2636;3507;4091
sp|O52762|CATA_PSEAE	sp|O52762|CATA_PSEAE	10	10	10	>sp|O52762|CATA_PSEAE Catalase OS=Pseudomonas aeruginosa (strain ATCC 15692 / PAO1 / 1C / PRS 101 / LMG 12228) GN=katA PE=1 SV=1	1	10	10	10	32.2	32.2	32.2	55.588	482	482	0	90.892	44545000	22				15	208;423;437;629;654;736;812;849;1043;1078	True;True;True;True;True;True;True;True;True;True	218;437;451;644;669;753;832;869;1065;1100	389;747;748;770;1098;1099;1145;1146;1147;1294;1295;1430;1502;1852;1909;1910	869;1479;1480;1514;2081;2082;2083;2190;2191;2192;2442;2443;2444;2445;2726;2945;2946;3631;3632;3748;3749;3750	869;1479;1514;2081;2191;2443;2726;2945;3632;3750
sp|O54439|ACP1_PSEAE	sp|O54439|ACP1_PSEAE	2	2	2	>sp|O54439|ACP1_PSEAE Acyl carrier protein 1 OS=Pseudomonas aeruginosa (strain ATCC 15692 / PAO1 / 1C / PRS 101 / LMG 12228) GN=acpP1 PE=3 SV=4	1	2	2	2	32.1	32.1	32.1	8.7406	78	78	0	23.06	42405000	21				16	566;569	True;True	581;584	985;986;987;988;992;993	1861;1862;1863;1864;1865;1866;1867;1868;1869;1870;1871;1872;1873;1874;1880;1881;1882;1883;1884;1885;1886	1869;1884
sp|O68822|AMPA_PSEAE	sp|O68822|AMPA_PSEAE	11	11	11	>sp|O68822|AMPA_PSEAE Cytosol aminopeptidase OS=Pseudomonas aeruginosa (strain ATCC 15692 / PAO1 / 1C / PRS 101 / LMG 12228) GN=pepA PE=3 SV=1	1	11	11	11	35.2	35.2	35.2	52.331	495	495	0	104.68	138110000	32				17	154;166;241;267;401;405;611;667;685;866;1105	True;True;True;True;True;True;True;True;True;True;True	163;175;252;278;415;419;626;682;700;887;1127	285;286;306;445;446;486;487;710;718;719;720;1066;1170;1171;1211;1212;1532;1533;1967;1968	605;606;607;608;609;633;973;974;975;1056;1057;1058;1059;1416;1432;1433;1434;1435;1436;1437;1438;2030;2249;2250;2251;2252;2301;2302;3023;3024;3830;3831	605;633;973;1058;1416;1432;2030;2252;2302;3023;3831
sp|O69754|PHZF_PSEAE	sp|O69754|PHZF_PSEAE	2	2	2	>sp|O69754|PHZF_PSEAE Trans-2,3-dihydro-3-hydroxyanthranilate isomerase OS=Pseudomonas aeruginosa (strain ATCC 15692 / PAO1 / 1C / PRS 101 / LMG 12228) GN=phzF1 PE=3 SV=2	1	2	2	2	13.7	13.7	13.7	30.342	278	278	0	15.427	9191400	4				18	774;861	True;True	791;882	1358;1525;1526	2566;2567;3010;3011	2567;3010
sp|O82850|RS2_PSEAE	sp|O82850|RS2_PSEAE	6	6	6	>sp|O82850|RS2_PSEAE 30S ribosomal protein S2 OS=Pseudomonas aeruginosa (strain ATCC 15692 / PAO1 / 1C / PRS 101 / LMG 12228) GN=rpsB PE=3 SV=2	1	6	6	6	31.3	31.3	31.3	27.336	246	246	0	46.148	39436000	15				19	197;511;644;719;1031;1211	True;True;True;True;True;True	206;525;659;736;1053;1235	362;363;885;1130;1269;1834;1835;2144;2145	740;741;1702;2167;2395;3602;3603;3604;3605;3606;3607;4167;4168;4169;4170	740;1702;2167;2395;3606;4170
sp|O82851|EFTS_PSEAE	sp|O82851|EFTS_PSEAE	3	3	3	>sp|O82851|EFTS_PSEAE Elongation factor Ts OS=Pseudomonas aeruginosa (strain ATCC 15692 / PAO1 / 1C / PRS 101 / LMG 12228) GN=tsf PE=3 SV=1	1	3	3	3	13.5	13.5	13.5	30.653	289	289	0	18.756	7123700	4				20	321;465;729	True;True;True	334;479;746	581;819;1284	1205;1598;1599;2428	1205;1598;2428
sp|O86428|ILVE_PSEAE	sp|O86428|ILVE_PSEAE	2	2	2	>sp|O86428|ILVE_PSEAE Branched-chain-amino-acid aminotransferase OS=Pseudomonas aeruginosa (strain ATCC 15692 / PAO1 / 1C / PRS 101 / LMG 12228) GN=ilvE PE=1 SV=2	1	2	2	2	6.8	6.8	6.8	34.084	307	307	0	12.895	10392000	5				21	168;170	True;True	177;179	309;310;313	637;638;639;640;644	637;644
sp|P04739|FMPO_PSEAE	sp|P04739|FMPO_PSEAE	4	4	4	>sp|P04739|FMPO_PSEAE Fimbrial protein OS=Pseudomonas aeruginosa (strain ATCC 15692 / PAO1 / 1C / PRS 101 / LMG 12228) GN=pilA PE=1 SV=1	1	4	4	4	36.2	36.2	36.2	15.512	149	149	0	32.441	23405000	6				22	506;915;971;1054	True;True;True;True	520;936;993;1076	877;1612;1613;1727;1870;1871	1694;3167;3168;3375;3669;3670	1694;3167;3375;3669
sp|P05384|DBHB_PSEAE	sp|P05384|DBHB_PSEAE	1	1	1	>sp|P05384|DBHB_PSEAE DNA-binding protein HU-beta OS=Pseudomonas aeruginosa (strain ATCC 15692 / PAO1 / 1C / PRS 101 / LMG 12228) GN=hupB PE=1 SV=3	1	1	1	1	15.6	15.6	15.6	9.0865	90	90	0	11.831	17273000	6				23	81	TRUE	85	158;159	393;394;395;396;397;398	397
sp|P08280|RECA_PSEAE	sp|P08280|RECA_PSEAE	1	1	1	>sp|P08280|RECA_PSEAE Protein RecA OS=Pseudomonas aeruginosa (strain ATCC 15692 / PAO1 / 1C / PRS 101 / LMG 12228) GN=recA PE=3 SV=1	1	1	1	1	5.2	5.2	5.2	36.879	346	346	0.0041322	6.2174	345630	1				24	952	TRUE	973	1673	3258	3258
sp|P08308|OTCC_PSEAE	sp|P08308|OTCC_PSEAE	12	12	12	>sp|P08308|OTCC_PSEAE Ornithine carbamoyltransferase, catabolic OS=Pseudomonas aeruginosa (strain ATCC 15692 / PAO1 / 1C / PRS 101 / LMG 12228) GN=arcB PE=1 SV=3	1	12	12	12	42.6	42.6	42.6	38.108	336	336	0	88.194	254530000	53				25	72;269;300;519;732;733;811;835;846;879;883;1239	True;True;True;True;True;True;True;True;True;True;True;True	76;280;281;312;313;534;749;750;831;855;866;900;904;1263	141;142;489;490;491;547;548;549;899;1288;1289;1290;1428;1429;1479;1480;1497;1498;1550;1551;1556;1557;2192;2193	368;369;1061;1062;1063;1064;1065;1066;1067;1068;1153;1154;1155;1156;1157;1158;1723;2432;2433;2434;2435;2436;2722;2723;2724;2725;2902;2903;2904;2905;2906;2935;2936;2937;2938;2939;2940;3052;3053;3062;3063;3064;3065;3066;3067;3068;3069;4324;4325;4326;4327;4328;4329;4330	368;1066;1158;1723;2434;2436;2723;2905;2936;3052;3063;4328	1;2;3	146;258;261
sp|P09591|EFTU_PSEAE	sp|P09591|EFTU_PSEAE	15	15	15	>sp|P09591|EFTU_PSEAE Elongation factor Tu OS=Pseudomonas aeruginosa (strain ATCC 15692 / PAO1 / 1C / PRS 101 / LMG 12228) GN=tufA PE=1 SV=2	1	15	15	15	49.1	49.1	49.1	43.369	397	397	0	223.29	1599300000	364				26	27;48;53;70;179;201;202;402;455;742;809;897;1051;1056;1164	True;True;True;True;True;True;True;True;True;True;True;True;True;True;True	27;28;29;50;55;73;74;188;210;211;212;416;469;759;827;828;829;918;1073;1078;1187	48;49;50;51;52;53;54;55;56;57;58;59;94;102;103;104;133;134;135;136;137;138;335;372;373;374;375;376;377;378;379;380;381;711;712;713;714;802;803;804;805;1303;1304;1305;1413;1414;1415;1416;1417;1418;1419;1420;1421;1422;1423;1578;1579;1865;1866;1873;2070;2071;2072	105;106;107;108;109;110;111;112;113;114;115;116;117;118;119;120;121;122;123;124;125;126;127;128;129;130;131;132;133;134;135;136;137;138;139;140;141;142;143;144;145;146;147;148;149;150;151;152;153;154;155;156;157;158;159;160;161;162;163;164;165;166;167;168;169;170;171;172;234;249;250;251;252;253;254;255;256;257;258;259;260;261;262;263;264;265;266;267;268;269;317;318;319;320;321;322;323;324;325;326…	158;234;249;320;688;779;828;1422;1582;2471;2711;3101;3658;3672;4036	4;5;6;7;8;9	140;152;177;216;362;372
sp|P11221|OPRI_PSEAE	sp|P11221|OPRI_PSEAE	2	2	2	>sp|P11221|OPRI_PSEAE Major outer membrane lipoprotein OS=Pseudomonas aeruginosa (strain ATCC 15692 / PAO1 / 1C / PRS 101 / LMG 12228) GN=oprI PE=3 SV=1	1	2	2	2	24.1	24.1	24.1	8.8348	83	83	0	15.282	5991400	7				27	21;728	True;True	21;745	35;1282;1283	75;2422;2423;2424;2425;2426;2427	75;2423
sp|P11436|AMIE_PSEAE	sp|P11436|AMIE_PSEAE	2	2	2	>sp|P11436|AMIE_PSEAE Aliphatic amidase OS=Pseudomonas aeruginosa (strain ATCC 15692 / PAO1 / 1C / PRS 101 / LMG 12228) GN=amiE PE=1 SV=2	1	2	2	2	6.1	6.1	6.1	38.494	346	346	0	11.367	1827900	2				28	456;716	True;True	470;733	806;1264	1584;2390	1584;2390
sp|P13794|PORF_PSEAE	sp|P13794|PORF_PSEAE	5	5	5	>sp|P13794|PORF_PSEAE Outer membrane porin F OS=Pseudomonas aeruginosa (strain ATCC 15692 / PAO1 / 1C / PRS 101 / LMG 12228) GN=oprF PE=1 SV=1	1	5	5	5	22.9	22.9	22.9	37.639	350	350	0	36.878	15491000	8				29	140;227;899;904;1143	True;True;True;True;True	149;238;920;925;1165	260;419;1582;1593;1594;2032;2033	568;921;922;3114;3133;3134;3934;3935	568;922;3114;3134;3934
sp|P13981|ARCA_PSEAE	sp|P13981|ARCA_PSEAE	19	19	19	>sp|P13981|ARCA_PSEAE Arginine deiminase OS=Pseudomonas aeruginosa (strain ATCC 15692 / PAO1 / 1C / PRS 101 / LMG 12228) GN=arcA PE=1 SV=2	1	19	19	19	51.4	51.4	51.4	46.435	418	418	0	289.96	1130800000	200				30	62;187;207;260;294;398;562;584;585;599;858;869;880;903;982;1004;1005;1119;1193	True;True;True;True;True;True;True;True;True;True;True;True;True;True;True;True;True;True;True	65;196;217;271;306;412;577;599;600;614;879;890;901;924;1004;1026;1027;1141;1217	118;119;347;348;387;388;475;476;536;537;538;704;705;706;978;979;1016;1017;1018;1019;1020;1042;1043;1044;1045;1522;1536;1537;1552;1553;1589;1590;1591;1592;1747;1748;1787;1788;1789;1790;1791;1792;1793;1794;1795;1995;2116;2117	287;288;289;290;715;716;717;718;719;720;721;722;723;724;725;855;856;857;858;859;860;861;862;863;864;865;866;867;868;1029;1030;1126;1127;1128;1129;1130;1131;1132;1133;1134;1135;1136;1137;1138;1139;1401;1402;1403;1404;1405;1406;1407;1408;1409;1410;1411;1847;1848;1849;1850;1851;1852;1853;1919;1920;1921;1922;1923;1924;1925;1926;1927;1928;1929;1930;1931;1932;1933;1934;1935;1936;1975;1976;1977;1978;197…	290;716;856;1029;1133;1402;1851;1921;1923;1977;3003;3028;3054;3128;3418;3513;3548;3867;4121
sp|P13982|ARCC_PSEAE	sp|P13982|ARCC_PSEAE	4	4	4	>sp|P13982|ARCC_PSEAE Carbamate kinase OS=Pseudomonas aeruginosa (strain ATCC 15692 / PAO1 / 1C / PRS 101 / LMG 12228) GN=arcC PE=3 SV=1	1	4	4	4	22.3	22.3	22.3	33.08	310	310	0	41.883	32983000	13				31	66;177;639;1075	True;True;True;True	69;186;654;1097	127;328;329;1120;1121;1904;1905	305;661;662;663;664;665;666;2143;2144;3718;3719;3720;3721	305;662;2144;3719
sp|P14165|CISY_PSEAE	sp|P14165|CISY_PSEAE	5	5	5	>sp|P14165|CISY_PSEAE Citrate synthase OS=Pseudomonas aeruginosa (strain ATCC 15692 / PAO1 / 1C / PRS 101 / LMG 12228) GN=gltA PE=3 SV=2	1	5	5	5	14	14	14	47.694	428	428	0	29.207	38571000	8				32	372;454;784;800;843	True;True;True;True;True	386;468;801;817;863	666;800;801;1371;1372;1396;1397;1493	1340;1574;1575;2598;2599;2633;2634;2931	1340;1575;2598;2634;2931
sp|P15276|ALGP_PSEAE	sp|P15276|ALGP_PSEAE	1	1	1	>sp|P15276|ALGP_PSEAE Transcriptional regulatory protein AlgP OS=Pseudomonas aeruginosa (strain ATCC 15692 / PAO1 / 1C / PRS 101 / LMG 12228) GN=algP PE=4 SV=2	1	1	1	1	4	4	4	34.49	352	352	0	7.1744	5668800	2				33	285	TRUE	297	521;522	1108;1109	1108
sp|P20582|PQSD_PSEAE	sp|P20582|PQSD_PSEAE	2	2	2	>sp|P20582|PQSD_PSEAE 2-heptyl-4(1H)-quinolone synthase PqsD OS=Pseudomonas aeruginosa (strain ATCC 15692 / PAO1 / 1C / PRS 101 / LMG 12228) GN=pqsD PE=1 SV=2	1	2	2	2	7.7	7.7	7.7	36.378	337	337	0	12.796	4677800	2				34	524;544	True;True	539;559	905;954	1729;1815	1729;1815
sp|P26480|RPOD_PSEAE	sp|P26480|RPOD_PSEAE	2	2	2	>sp|P26480|RPOD_PSEAE RNA polymerase sigma factor RpoD OS=Pseudomonas aeruginosa (strain ATCC 15692 / PAO1 / 1C / PRS 101 / LMG 12228) GN=rpoD PE=3 SV=1	1	2	2	2	4.5	4.5	4.5	69.643	617	617	0	13.877	484150	2				35	551;874	True;True	566;895	964;1544	1829;3044	1829;3044
sp|P28810|MMSA_PSEAE;tr|Q9I5I2|Q9I5I2_PSEAE	sp|P28810|MMSA_PSEAE;tr|Q9I5I2|Q9I5I2_PSEAE	2;1	2;1	2;1	>sp|P28810|MMSA_PSEAE Methylmalonate-semialdehyde dehydrogenase [acylating] OS=Pseudomonas aeruginosa (strain ATCC 15692 / PAO1 / 1C / PRS 101 / LMG 12228) GN=mmsA PE=1 SV=2;>tr|Q9I5I2|Q9I5I2_PSEAE Probable aldehyde dehydrogenase OS=Pseudomonas aeruginosa	2	2	2	2	5.8	5.8	5.8	53.663	497	497;502	0	14.087	7347800	2				36	597;661	True;True	612;676	1040;1160	1973;2238	1973;2238
sp|P29365|DHOM_PSEAE	sp|P29365|DHOM_PSEAE	2	2	2	>sp|P29365|DHOM_PSEAE Homoserine dehydrogenase OS=Pseudomonas aeruginosa (strain ATCC 15692 / PAO1 / 1C / PRS 101 / LMG 12228) GN=hom PE=3 SV=2	1	2	2	2	11.8	11.8	11.8	46.223	434	434	0	13.361	7506700	7				37	537;1006	True;True	552;1028	924;925;1796;1797	1758;1759;1760;3552;3553;3554;3555	1759;3553
sp|P30718|CH60_PSEAE	sp|P30718|CH60_PSEAE	16	16	16	>sp|P30718|CH60_PSEAE 60 kDa chaperonin OS=Pseudomonas aeruginosa (strain ATCC 15692 / PAO1 / 1C / PRS 101 / LMG 12228) GN=groL PE=1 SV=3	1	16	16	16	47	47	47	57.085	547	547	0	143.76	214950000	53				38	15;67;103;110;112;153;195;274;362;601;792;882;884;885;920;1094	True;True;True;True;True;True;True;True;True;True;True;True;True;True;True;True	15;70;108;116;118;162;204;286;376;616;809;903;905;906;941;1116	24;25;128;129;130;197;198;211;214;215;216;283;284;358;359;502;503;647;648;1047;1048;1384;1385;1555;1558;1559;1560;1561;1621;1622;1948;1949	56;57;58;59;60;306;307;308;309;310;311;312;313;314;454;455;478;481;482;483;484;485;486;487;488;602;603;604;736;737;1085;1086;1087;1088;1314;1315;1992;1993;2617;2618;2619;2620;3060;3061;3070;3071;3072;3073;3074;3177;3178;3797;3798	56;310;454;478;482;602;736;1088;1314;1992;2618;3061;3070;3072;3177;3797
sp|P37798|ACCC_PSEAE	sp|P37798|ACCC_PSEAE	8	8	8	>sp|P37798|ACCC_PSEAE Biotin carboxylase OS=Pseudomonas aeruginosa (strain ATCC 15692 / PAO1 / 1C / PRS 101 / LMG 12228) GN=accC PE=1 SV=1	1	8	8	8	27.2	27.2	27.2	48.887	449	449	0	67.533	103670000	25				39	63;819;924;994;1111;1118;1171;1201	True;True;True;True;True;True;True;True	66;839;945;1016;1133;1140;1194;1225	120;121;122;1452;1453;1626;1627;1772;1773;1977;1978;1992;1993;1994;2082;2127;2128;2129	291;292;293;294;295;2862;2863;2864;2865;3185;3186;3187;3494;3495;3846;3847;3848;3849;3863;3864;3865;4065;4141;4142;4143	291;2865;3185;3494;3847;3865;4065;4141
sp|P37799|BCCP_PSEAE	sp|P37799|BCCP_PSEAE	5	5	5	>sp|P37799|BCCP_PSEAE Biotin carboxyl carrier protein of acetyl-CoA carboxylase OS=Pseudomonas aeruginosa (strain ATCC 15692 / PAO1 / 1C / PRS 101 / LMG 12228) GN=accB PE=3 SV=1	1	5	5	5	53.2	53.2	53.2	16.455	156	156	0	87.919	1147500000	121				40	13;587;658;959;986	True;True;True;True;True	13;602;673;980;981;1008	21;22;1024;1025;1151;1152;1153;1154;1155;1156;1157;1682;1683;1684;1685;1686;1687;1688;1689;1753;1754;1755;1756;1757;1758	34;35;36;37;38;39;40;41;42;43;44;45;46;47;48;49;50;51;52;53;54;1940;1941;2197;2198;2199;2200;2201;2202;2203;2204;2205;2206;2207;2208;2209;2210;2211;2212;2213;2214;2215;2216;2217;2218;2219;2220;2221;2222;2223;2224;2225;2226;2227;2228;2229;2230;2231;2232;2233;2234;2235;3269;3270;3271;3272;3273;3274;3275;3276;3277;3278;3279;3280;3281;3282;3283;3284;3285;3286;3287;3288;3289;3290;3291;3435;3436;3437;3…	36;1941;2233;3280;3456	10	87
sp|P38100|CARB_PSEAE	sp|P38100|CARB_PSEAE	13	13	13	>sp|P38100|CARB_PSEAE Carbamoyl-phosphate synthase large chain OS=Pseudomonas aeruginosa (strain ATCC 15692 / PAO1 / 1C / PRS 101 / LMG 12228) GN=carB PE=3 SV=3	1	13	13	13	19.3	19.3	19.3	117.33	1073	1073	0	96.745	54019000	21				41	84;315;407;409;438;535;614;759;1021;1027;1038;1110;1112	True;True;True;True;True;True;True;True;True;True;True;True;True	88;328;421;423;452;550;629;776;1043;1049;1060;1132;1134	162;573;723;724;727;728;771;772;921;1073;1333;1818;1828;1829;1845;1846;1976;1979	401;402;1195;1442;1443;1444;1447;1448;1515;1516;1754;1755;2043;2513;3583;3584;3595;3596;3619;3620;3844;3845;3850	401;1195;1443;1447;1515;1755;2043;2513;3584;3595;3619;3845;3850
sp|P43336|PHHC_PSEAE	sp|P43336|PHHC_PSEAE	5	5	5	>sp|P43336|PHHC_PSEAE Aromatic-amino-acid aminotransferase OS=Pseudomonas aeruginosa (strain ATCC 15692 / PAO1 / 1C / PRS 101 / LMG 12228) GN=phhC PE=3 SV=2	1	5	5	5	18	18	18	43.273	399	399	0	33.706	13571000	8				42	19;504;596;1156;1177	True;True;True;True;True	19;518;611;1179;1201	32;33;875;1038;1039;2057;2094	72;73;1691;1971;1972;4011;4012;4089	72;1691;1972;4011;4089
sp|P47203|FTSA_PSEAE	sp|P47203|FTSA_PSEAE	1	1	1	>sp|P47203|FTSA_PSEAE Cell division protein FtsA OS=Pseudomonas aeruginosa (strain ATCC 15692 / PAO1 / 1C / PRS 101 / LMG 12228) GN=ftsA PE=3 SV=2	1	1	1	1	2.4	2.4	2.4	44.646	417	417	0	6.4042	1814100	1				43	1041	TRUE	1063	1850	3627	3627
sp|P47204|FTSZ_PSEAE	sp|P47204|FTSZ_PSEAE	3	3	3	>sp|P47204|FTSZ_PSEAE Cell division protein FtsZ OS=Pseudomonas aeruginosa (strain ATCC 15692 / PAO1 / 1C / PRS 101 / LMG 12228) GN=ftsZ PE=1 SV=2	1	3	3	3	12.2	12.2	12.2	41.218	394	394	0	23.347	3653200	6				44	410;700;1191	True;True;True	424;716;1215	729;730;1239;2112;2113	1449;1450;2346;2347;4116;4117	1450;2347;4116
sp|P48247|GSA_PSEAE	sp|P48247|GSA_PSEAE	4	4	4	>sp|P48247|GSA_PSEAE Glutamate-1-semialdehyde 2,1-aminomutase OS=Pseudomonas aeruginosa (strain ATCC 15692 / PAO1 / 1C / PRS 101 / LMG 12228) GN=hemL PE=1 SV=2	1	4	4	4	15.7	15.7	15.7	45.397	427	427	0	38.665	22960000	9				45	60;808;976;1070	True;True;True;True	63;826;998;1092	114;115;1412;1737;1895;1896	281;282;283;2654;2655;3404;3700;3701;3702	281;2654;3404;3702
sp|P53593|SUCC_PSEAE	sp|P53593|SUCC_PSEAE	13	13	13	>sp|P53593|SUCC_PSEAE Succinyl-CoA ligase [ADP-forming] subunit beta OS=Pseudomonas aeruginosa (strain ATCC 15692 / PAO1 / 1C / PRS 101 / LMG 12228) GN=sucC PE=3 SV=2	1	13	13	13	42	42	42	41.542	388	388	0	156.02	308410000	73				46	46;146;160;262;499;512;540;626;630;748;842;889;1124	True;True;True;True;True;True;True;True;True;True;True;True;True	48;155;169;273;513;526;555;641;645;765;862;910;1146	90;91;268;269;295;296;478;479;868;886;887;929;930;1092;1100;1101;1315;1490;1491;1492;1566;1567;2001;2002;2003;2004	224;225;226;227;228;229;576;577;578;579;580;581;620;621;1033;1034;1035;1036;1037;1038;1680;1681;1682;1703;1704;1705;1706;1707;1764;1765;1766;1767;1768;1769;1770;1771;2070;2084;2085;2493;2923;2924;2925;2926;2927;2928;2929;2930;3081;3082;3083;3084;3085;3086;3878;3879;3880;3881;3882;3883;3884;3885;3886;3887;3888;3889;3890;3891;3892;3893;3894;3895;3896;3897	225;579;620;1037;1681;1704;1769;2070;2084;2493;2927;3082;3883
sp|P53641|SODF_PSEAE	sp|P53641|SODF_PSEAE	2	2	2	>sp|P53641|SODF_PSEAE Superoxide dismutase [Fe] OS=Pseudomonas aeruginosa (strain ATCC 15692 / PAO1 / 1C / PRS 101 / LMG 12228) GN=sodB PE=3 SV=3	1	2	2	2	13.5	13.5	13.5	21.351	193	193	0	16.107	36054000	8				47	49;1049	True;True	51;1071	95;96;1861;1862	235;236;237;238;3648;3649;3650;3651	235;3649
sp|P57112|STHA_PSEAE	sp|P57112|STHA_PSEAE	3	3	3	>sp|P57112|STHA_PSEAE Soluble pyridine nucleotide transhydrogenase OS=Pseudomonas aeruginosa (strain ATCC 15692 / PAO1 / 1C / PRS 101 / LMG 12228) GN=sthA PE=1 SV=2	1	3	3	3	6.7	6.7	6.7	51.16	464	464	0	16.916	2793300	3				48	130;424;647	True;True;True	137;438;662	244;749;1135	541;1481;2176	541;1481;2176
sp|P72173|AAT_PSEAE	sp|P72173|AAT_PSEAE	8	8	8	>sp|P72173|AAT_PSEAE Aspartate aminotransferase OS=Pseudomonas aeruginosa (strain ATCC 15692 / PAO1 / 1C / PRS 101 / LMG 12228) GN=aspC PE=3 SV=2	1	8	8	8	28.1	28.1	28.1	43.319	398	398	0	82.369	56561000	17				49	56;89;215;453;675;1095;1200;1246	True;True;True;True;True;True;True;True	58;93;226;467;690;1117;1224;1270	108;109;171;172;403;798;799;1186;1187;1950;1951;2125;2126;2202;2203	274;275;416;417;418;891;1571;1572;1573;2274;2275;3799;3800;4138;4139;4140;4341;4342	274;416;891;1571;2274;3799;4138;4342
sp|P77915|HEMN_PSEAE	sp|P77915|HEMN_PSEAE	3	3	3	>sp|P77915|HEMN_PSEAE Oxygen-independent coproporphyrinogen-III oxidase OS=Pseudomonas aeruginosa (strain ATCC 15692 / PAO1 / 1C / PRS 101 / LMG 12228) GN=hemN PE=2 SV=2	1	3	3	3	7.4	7.4	7.4	52.488	460	460	0	25.345	5464500	4				50	297;938;1178	True;True;True	309;959;1202	542;1649;2095	1145;3216;3217;4090	1145;3217;4090
sp|Q51342|PUR1_PSEAE	sp|Q51342|PUR1_PSEAE	5	5	5	>sp|Q51342|PUR1_PSEAE Amidophosphoribosyltransferase OS=Pseudomonas aeruginosa (strain ATCC 15692 / PAO1 / 1C / PRS 101 / LMG 12228) GN=purF PE=3 SV=3	1	5	5	5	15	15	15	55.369	501	501	0	33.091	19425000	9				51	196;659;859;956;985	True;True;True;True;True	205;674;880;977;1007	360;361;1158;1523;1678;1679;1751;1752	738;739;2236;3008;3263;3264;3265;3433;3434	739;2236;3008;3265;3434
sp|Q51422|SYDND_PSEAE	sp|Q51422|SYDND_PSEAE	6	6	6	>sp|Q51422|SYDND_PSEAE Aspartate--tRNA(Asp/Asn) ligase OS=Pseudomonas aeruginosa (strain ATCC 15692 / PAO1 / 1C / PRS 101 / LMG 12228) GN=aspS PE=1 SV=2	1	6	6	6	13.4	13.4	13.4	66.207	591	591	0	45.34	26380000	11				52	312;548;1044;1097;1155;1222	True;True;True;True;True;True	325;563;1066;1119;1178;1246	566;959;960;1853;1953;1954;2056;2167	1180;1820;1821;1822;1823;3633;3802;3803;3804;4009;4010;4289	1180;1823;3633;3802;4010;4289
sp|Q51561|RPOB_PSEAE	sp|Q51561|RPOB_PSEAE	31	31	31	>sp|Q51561|RPOB_PSEAE DNA-directed RNA polymerase subunit beta OS=Pseudomonas aeruginosa (strain ATCC 15692 / PAO1 / 1C / PRS 101 / LMG 12228) GN=rpoB PE=3 SV=2	1	31	31	31	36.2	36.2	36.2	150.84	1357	1357	0	306.4	351370000	97				53	64;119;222;233;247;248;361;374;389;390;426;430;444;447;477;572;594;704;718;723;765;769;796;898;969;996;1011;1066;1173;1218;1223	True;True;True;True;True;True;True;True;True;True;True;True;True;True;True;True;True;True;True;True;True;True;True;True;True;True;True;True;True;True;True	67;126;233;244;258;259;375;388;403;404;440;444;458;461;491;587;609;720;735;740;782;786;813;919;991;1018;1033;1088;1197;1242;1247	123;124;226;227;413;429;430;454;455;456;645;646;669;670;692;693;694;751;752;757;758;783;788;789;833;834;997;998;1035;1036;1245;1246;1267;1268;1274;1275;1342;1343;1349;1350;1390;1391;1580;1581;1703;1704;1776;1777;1805;1888;1889;2088;2089;2156;2157;2168;2169	296;297;298;299;300;301;506;507;508;509;510;511;908;909;910;911;912;913;914;947;948;949;950;987;988;989;990;991;992;1312;1313;1343;1344;1345;1346;1384;1385;1386;1387;1483;1484;1491;1492;1549;1559;1560;1561;1562;1617;1618;1619;1891;1892;1893;1894;1966;1967;1968;1969;2360;2361;2362;2363;2364;2393;2394;2406;2407;2537;2538;2539;2553;2554;2625;2626;3110;3111;3112;3113;3315;3316;3317;3498;3499;3500;356…	296;506;908;947;987;991;1313;1345;1384;1385;1484;1491;1549;1560;1617;1894;1967;2360;2394;2406;2537;2553;2625;3111;3315;3500;3565;3691;4083;4191;4290
sp|Q51567|SUCD_PSEAE	sp|Q51567|SUCD_PSEAE	7	7	7	>sp|Q51567|SUCD_PSEAE Succinyl-CoA ligase [ADP-forming] subunit alpha OS=Pseudomonas aeruginosa (strain ATCC 15692 / PAO1 / 1C / PRS 101 / LMG 12228) GN=sucD PE=3 SV=2	1	7	7	7	33.9	33.9	33.9	30.266	295	295	0	54.715	99221000	39				54	79;221;298;387;631;776;929	True;True;True;True;True;True;True	83;232;310;401;646;793;950	155;156;410;411;412;543;544;690;1102;1103;1361;1634;1635	386;387;388;389;390;391;900;901;902;903;904;905;906;907;1146;1147;1148;1149;1150;1381;1382;2086;2087;2088;2089;2090;2091;2092;2093;2094;2095;2096;2097;2098;2099;2582;3196;3197;3198	389;900;1146;1382;2088;2582;3196
sp|Q59637|ODP1_PSEAE	sp|Q59637|ODP1_PSEAE	22	22	22	>sp|Q59637|ODP1_PSEAE Pyruvate dehydrogenase E1 component OS=Pseudomonas aeruginosa (strain ATCC 15692 / PAO1 / 1C / PRS 101 / LMG 12228) GN=aceE PE=3 SV=2	1	22	22	22	26.3	26.3	26.3	99.563	882	882	0	158.07	202050000	51				55	8;194;205;223;259;349;417;497;516;556;576;706;757;767;797;823;829;900;930;951;1002;1132	True;True;True;True;True;True;True;True;True;True;True;True;True;True;True;True;True;True;True;True;True;True	8;203;215;234;270;363;431;511;530;571;591;722;774;784;814;843;849;921;951;972;1024;1154	12;13;356;357;384;414;473;474;628;629;740;865;866;891;892;971;972;1003;1249;1250;1329;1330;1345;1346;1392;1393;1461;1470;1583;1636;1671;1672;1784;1785;2015;2016	20;21;22;734;735;851;915;1026;1027;1028;1282;1283;1284;1285;1468;1677;1678;1711;1712;1713;1837;1838;1839;1840;1841;1899;1900;2371;2372;2509;2510;2543;2544;2545;2627;2628;2629;2630;2876;2877;2888;3115;3199;3253;3254;3255;3256;3257;3509;3510;3912;3913	20;734;851;915;1028;1282;1468;1677;1711;1837;1899;2372;2509;2543;2628;2876;2888;3115;3199;3257;3510;3913
sp|Q59638|ODP2_PSEAE	sp|Q59638|ODP2_PSEAE	16	16	16	>sp|Q59638|ODP2_PSEAE Dihydrolipoyllysine-residue acetyltransferase component of pyruvate dehydrogenase complex OS=Pseudomonas aeruginosa (strain ATCC 15692 / PAO1 / 1C / PRS 101 / LMG 12228) GN=aceF PE=2 SV=2	1	16	16	16	40.8	40.8	40.8	56.708	547	547	0	118.55	140920000	49				56	28;30;31;115;149;270;311;528;638;669;689;737;925;944;1082;1098	True;True;True;True;True;True;True;True;True;True;True;True;True;True;True;True	30;32;33;122;158;282;324;543;653;684;705;754;946;965;1104;1120	60;61;63;64;65;66;221;276;277;492;493;564;565;911;1118;1119;1175;1176;1220;1221;1296;1297;1628;1629;1661;1662;1663;1926;1955;1956	173;174;175;177;178;179;180;181;182;183;496;497;590;591;1069;1070;1176;1177;1178;1179;1738;2141;2142;2256;2257;2258;2319;2320;2446;2447;2448;2449;3188;3189;3234;3235;3236;3237;3238;3239;3240;3241;3242;3243;3244;3766;3805;3806;3807	174;177;183;497;590;1070;1179;1738;2141;2256;2319;2448;3189;3240;3766;3805
sp|Q9HT14|ATP6_PSEAE	sp|Q9HT14|ATP6_PSEAE	2	2	2	>sp|Q9HT14|ATP6_PSEAE ATP synthase subunit a OS=Pseudomonas aeruginosa (strain ATCC 15692 / PAO1 / 1C / PRS 101 / LMG 12228) GN=atpB PE=3 SV=1	1	2	2	2	9	9	9	31.92	289	289	0	11.248	1856300	2				57	563;710	True;True	578;726	980;1254	1854;2376	1854;2376
sp|Q9HT16|ATPF_PSEAE	sp|Q9HT16|ATPF_PSEAE	1	1	1	>sp|Q9HT16|ATPF_PSEAE ATP synthase subunit b OS=Pseudomonas aeruginosa (strain ATCC 15692 / PAO1 / 1C / PRS 101 / LMG 12228) GN=atpF PE=3 SV=1	1	1	1	1	8.3	8.3	8.3	16.956	156	156	0	8.5947	1696600	1				58	133	TRUE	141	249	551	551
sp|Q9HT18|ATPA_PSEAE	sp|Q9HT18|ATPA_PSEAE	13	13	13	>sp|Q9HT18|ATPA_PSEAE ATP synthase subunit alpha OS=Pseudomonas aeruginosa (strain ATCC 15692 / PAO1 / 1C / PRS 101 / LMG 12228) GN=atpA PE=3 SV=1	1	13	13	13	30	30	30	55.393	514	514	0	115.01	168190000	42				59	217;243;261;360;377;525;589;824;974;975;988;1106;1190	True;True;True;True;True;True;True;True;True;True;True;True;True	228;254;272;374;391;540;604;844;996;997;1010;1128;1214	405;449;477;643;644;675;676;906;907;1027;1028;1462;1463;1732;1733;1734;1735;1736;1761;1762;1969;1970;2111	893;979;1031;1032;1308;1309;1310;1311;1353;1354;1355;1356;1357;1730;1731;1732;1733;1734;1943;1944;2878;2879;2880;3394;3395;3396;3397;3398;3399;3400;3401;3402;3403;3473;3474;3475;3476;3477;3832;3833;4114;4115	893;979;1031;1308;1355;1730;1944;2878;3397;3401;3475;3832;4115
sp|Q9HT19|ATPG_PSEAE	sp|Q9HT19|ATPG_PSEAE	5	5	5	>sp|Q9HT19|ATPG_PSEAE ATP synthase gamma chain OS=Pseudomonas aeruginosa (strain ATCC 15692 / PAO1 / 1C / PRS 101 / LMG 12228) GN=atpG PE=3 SV=1	1	5	5	5	31.8	31.8	31.8	31.553	286	286	0	39.273	20068000	11				60	348;821;921;943;1141	True;True;True;True;True	362;841;942;964;1163	627;1456;1457;1458;1623;1659;1660;2030	1281;2868;2869;2870;2871;2872;2873;3179;3180;3232;3233;3932	1281;2869;3179;3233;3932
sp|Q9HT20|ATPB_PSEAE	sp|Q9HT20|ATPB_PSEAE	11	11	11	>sp|Q9HT20|ATPB_PSEAE ATP synthase subunit beta OS=Pseudomonas aeruginosa (strain ATCC 15692 / PAO1 / 1C / PRS 101 / LMG 12228) GN=atpD PE=3 SV=1	1	11	11	11	39.7	39.7	39.7	49.499	458	458	0	143.7	86156000	24				61	188;192;240;331;534;799;886;933;1073;1074;1244	True;True;True;True;True;True;True;True;True;True;True	197;201;251;344;549;816;907;954;1095;1096;1268	349;353;443;444;600;601;919;920;1395;1562;1641;1900;1901;1902;1903;2199;2200	726;727;731;970;971;972;1237;1238;1239;1751;1752;1753;2632;3075;3204;3711;3712;3713;3714;3715;3716;3717;4338;4339	727;731;970;1238;1751;2632;3075;3204;3713;3715;4338
sp|Q9HT21|ATPE_PSEAE	sp|Q9HT21|ATPE_PSEAE	2	2	2	>sp|Q9HT21|ATPE_PSEAE ATP synthase epsilon chain OS=Pseudomonas aeruginosa (strain ATCC 15692 / PAO1 / 1C / PRS 101 / LMG 12228) GN=atpC PE=3 SV=1	1	2	2	2	16.3	16.3	16.3	14.726	141	141	0	12.893	1988000	2				62	52;595	True;True	54;610	101;1037	248;1970	248;1970
sp|Q9HT95|ATSE4_PSEAE	sp|Q9HT95|ATSE4_PSEAE	2	2	2	>sp|Q9HT95|ATSE4_PSEAE Acetyltransferase PA5475 OS=Pseudomonas aeruginosa (strain ATCC 15692 / PAO1 / 1C / PRS 101 / LMG 12228) GN=PA5475 PE=3 SV=1	1	2	2	2	11.8	11.8	11.8	21	186	186	0	14.064	3613400	7				63	214;893	True;True	225;914	399;400;401;402;1572;1573	887;888;889;890;3092;3093;3094	888;3093
sp|Q9HTD7|ASPA_PSEAE	sp|Q9HTD7|ASPA_PSEAE	3	3	3	>sp|Q9HTD7|ASPA_PSEAE Aspartate ammonia-lyase OS=Pseudomonas aeruginosa (strain ATCC 15692 / PAO1 / 1C / PRS 101 / LMG 12228) GN=aspA PE=3 SV=1	1	3	3	3	14.3	14.3	14.3	51.069	474	474	0	19.436	11609000	7				64	199;608;671	True;True;True	208;623;686	366;367;1062;1178;1179	744;745;2021;2022;2260;2261;2262	744;2021;2262
sp|Q9HTF1|LTAE_PSEAE	sp|Q9HTF1|LTAE_PSEAE	2	2	2	>sp|Q9HTF1|LTAE_PSEAE Low specificity L-threonine aldolase OS=Pseudomonas aeruginosa (strain ATCC 15692 / PAO1 / 1C / PRS 101 / LMG 12228) GN=ltaE PE=3 SV=1	1	2	2	2	8.7	8.7	8.7	38.213	346	346	0	11.225	3804600	2				65	679;1199	True;True	694;1223	1201;2124	2290;4137	2290;4137
sp|Q9HTN8|RL28_PSEAE	sp|Q9HTN8|RL28_PSEAE	1	1	1	>sp|Q9HTN8|RL28_PSEAE 50S ribosomal protein L28 OS=Pseudomonas aeruginosa (strain ATCC 15692 / PAO1 / 1C / PRS 101 / LMG 12228) GN=rpmB PE=3 SV=1	1	1	1	1	12.8	12.8	12.8	9.0655	78	78	0	7.1512	8875900	3				66	399	TRUE	413	707;708	1412;1413;1414	1414
sp|Q9HTQ0|DADA1_PSEAE	sp|Q9HTQ0|DADA1_PSEAE	4	4	4	>sp|Q9HTQ0|DADA1_PSEAE D-amino acid dehydrogenase 1 OS=Pseudomonas aeruginosa (strain ATCC 15692 / PAO1 / 1C / PRS 101 / LMG 12228) GN=dadA1 PE=1 SV=1	1	4	4	4	8.3	8.3	8.3	47.139	432	432	0	23.159	15583000	5				67	42;189;931;1028	True;True;True;True	44;198;952;1050	82;350;1637;1638;1830	206;728;3200;3201;3597	206;728;3201;3597
sp|Q9HTV1|RHO_PSEAE	sp|Q9HTV1|RHO_PSEAE	3	3	3	>sp|Q9HTV1|RHO_PSEAE Transcription termination factor Rho OS=Pseudomonas aeruginosa (strain ATCC 15692 / PAO1 / 1C / PRS 101 / LMG 12228) GN=rho PE=3 SV=1	1	3	3	3	9.8	9.8	9.8	47.069	419	419	0	23.295	7929300	4				68	526;770;1018	True;True;True	541;787;1040	908;1351;1352;1813;1814	1735;2555;2556;3577;3578	1735;2555;3578
sp|Q9HTZ1|LDC_PSEAE	sp|Q9HTZ1|LDC_PSEAE	1	1	1	>sp|Q9HTZ1|LDC_PSEAE Murein tetrapeptide carboxypeptidase OS=Pseudomonas aeruginosa (strain ATCC 15692 / PAO1 / 1C / PRS 101 / LMG 12228) GN=PA5198 PE=1 SV=1	1	1	1	1	6.5	6.5	6.5	33.288	307	307	0.008	6.0354	259880	2				69	1071	TRUE	1093	1897	3703;3704	3704
sp|Q9HTZ7|PCKA_PSEAE	sp|Q9HTZ7|PCKA_PSEAE	3	3	3	>sp|Q9HTZ7|PCKA_PSEAE Phosphoenolpyruvate carboxykinase [ATP] OS=Pseudomonas aeruginosa (strain ATCC 15692 / PAO1 / 1C / PRS 101 / LMG 12228) GN=pckA PE=3 SV=1	1	3	3	3	6.8	6.8	6.8	55.731	513	513	0	20.327	13283000	5				70	163;320;804	True;True;True	172;333;821	301;302;580;1403;1404	626;627;1204;2642;2643	626;1204;2643
sp|Q9HU65|GLNA_PSEAE	sp|Q9HU65|GLNA_PSEAE	8	8	8	>sp|Q9HU65|GLNA_PSEAE Glutamine synthetase OS=Pseudomonas aeruginosa (strain ATCC 15692 / PAO1 / 1C / PRS 101 / LMG 12228) GN=glnA PE=1 SV=1	1	8	8	8	28.6	28.6	28.6	51.944	469	469	0	65.931	49343000	27				71	98;173;335;391;553;771;857;968	True;True;True;True;True;True;True;True	103;182;348;349;405;568;788;878;990	191;192;320;321;608;609;610;695;966;1353;1520;1521;1700;1701;1702	447;448;652;653;1247;1248;1249;1250;1251;1252;1253;1254;1255;1256;1257;1388;1831;2557;2997;2998;2999;3000;3309;3310;3311;3312;3313;3314	447;653;1250;1388;1831;2557;3000;3309	11	377
sp|Q9HUA6|OPGH_PSEAE	sp|Q9HUA6|OPGH_PSEAE	1	1	1	>sp|Q9HUA6|OPGH_PSEAE Glucans biosynthesis glucosyltransferase H OS=Pseudomonas aeruginosa (strain ATCC 15692 / PAO1 / 1C / PRS 101 / LMG 12228) GN=opgH PE=3 SV=1	1	1	1	1	1.9	1.9	1.9	96.994	861	861	0.007874	5.9612	210030	1				72	558	TRUE	573	974	1843	1843
sp|Q9HUC8|SYR_PSEAE	sp|Q9HUC8|SYR_PSEAE	2	2	2	>sp|Q9HUC8|SYR_PSEAE Arginine--tRNA ligase OS=Pseudomonas aeruginosa (strain ATCC 15692 / PAO1 / 1C / PRS 101 / LMG 12228) GN=argS PE=3 SV=1	1	2	2	2	3.9	3.9	3.9	65.199	587	587	0	15.478	3439300	3				73	656;1025	True;True	671;1047	1149;1823	2195;3589;3590	2195;3590
sp|Q9HUJ8|PARE_PSEAE	sp|Q9HUJ8|PARE_PSEAE	1	1	1	>sp|Q9HUJ8|PARE_PSEAE DNA topoisomerase 4 subunit B OS=Pseudomonas aeruginosa (strain ATCC 15692 / PAO1 / 1C / PRS 101 / LMG 12228) GN=parE PE=3 SV=1	1	1	1	1	1.9	1.9	1.9	69.178	629	629	0	7.0037	2006000	1				74	983	TRUE	1005	1749	3431	3431
sp|Q9HUM6|PURA_PSEAE	sp|Q9HUM6|PURA_PSEAE	3	3	3	>sp|Q9HUM6|PURA_PSEAE Adenylosuccinate synthetase OS=Pseudomonas aeruginosa (strain ATCC 15692 / PAO1 / 1C / PRS 101 / LMG 12228) GN=purA PE=3 SV=1	1	3	3	3	9.5	9.5	9.5	46.814	430	430	0	26.287	18029000	11				75	624;1024;1107	True;True;True	639;1046;1129	1088;1089;1821;1822;1971;1972	2066;2067;3587;3588;3834;3835;3836;3837;3838;3839;3840	2067;3587;3837
sp|Q9HUM9|RS6_PSEAE	sp|Q9HUM9|RS6_PSEAE	1	1	1	>sp|Q9HUM9|RS6_PSEAE 30S ribosomal protein S6 OS=Pseudomonas aeruginosa (strain ATCC 15692 / PAO1 / 1C / PRS 101 / LMG 12228) GN=rpsF PE=3 SV=1	1	1	1	1	7.2	7.2	7.2	16.164	139	139	0	7.5685	10715000	3				76	78	TRUE	82	153;154	383;384;385	383
sp|Q9HV43|DNAK_PSEAE	sp|Q9HV43|DNAK_PSEAE	10	10	10	>sp|Q9HV43|DNAK_PSEAE Chaperone protein DnaK OS=Pseudomonas aeruginosa (strain ATCC 15692 / PAO1 / 1C / PRS 101 / LMG 12228) GN=dnaK PE=3 SV=1	1	10	10	10	25.4	25.4	25.4	68.402	637	637	0	86.739	52138000	21				77	90;144;226;307;515;583;657;794;810;876	True;True;True;True;True;True;True;True;True;True	94;153;237;320;529;598;672;811;830;897	173;174;265;266;418;559;890;1015;1150;1387;1388;1424;1425;1426;1427;1546	419;420;573;574;920;1170;1710;1917;1918;2196;2622;2623;2714;2715;2716;2717;2718;2719;2720;2721;3046	419;573;920;1170;1710;1917;2196;2622;2715;3046
sp|Q9HV50|GLMM_PSEAE	sp|Q9HV50|GLMM_PSEAE	1	1	1	>sp|Q9HV50|GLMM_PSEAE Phosphoglucosamine mutase OS=Pseudomonas aeruginosa (strain ATCC 15692 / PAO1 / 1C / PRS 101 / LMG 12228) GN=glmM PE=3 SV=1	1	1	1	1	2.9	2.9	2.9	47.796	445	445	0	7.072	7644900	5				78	1101	TRUE	1123	1959;1960	3815;3816;3817;3818;3819	3818
sp|Q9HV55|IF2_PSEAE	sp|Q9HV55|IF2_PSEAE	7	7	7	>sp|Q9HV55|IF2_PSEAE Translation initiation factor IF-2 OS=Pseudomonas aeruginosa (strain ATCC 15692 / PAO1 / 1C / PRS 101 / LMG 12228) GN=infB PE=3 SV=1	1	7	7	7	14.8	14.8	14.8	90.911	840	840	0	40.949	21142000	14				79	276;427;476;650;777;831;1047	True;True;True;True;True;True;True	288;441;490;665;794;851;1069	506;753;832;1140;1362;1363;1473;1856	1091;1485;1616;2182;2183;2583;2584;2585;2586;2587;2588;2894;2895;3636	1091;1485;1616;2182;2583;2895;3636
sp|Q9HV59|PNP_PSEAE	sp|Q9HV59|PNP_PSEAE	15	15	15	>sp|Q9HV59|PNP_PSEAE Polyribonucleotide nucleotidyltransferase OS=Pseudomonas aeruginosa (strain ATCC 15692 / PAO1 / 1C / PRS 101 / LMG 12228) GN=pnp PE=3 SV=1	1	15	15	15	28	28	28	75.452	701	701	0	123.59	118360000	37				80	37;117;125;176;224;436;443;490;538;570;698;699;912;1137;1180	True;True;True;True;True;True;True;True;True;True;True;True;True;True;True	39;124;132;185;235;450;457;504;553;585;714;715;933;1159;1204	75;76;223;224;236;237;326;327;415;416;768;769;782;855;926;927;994;995;1237;1238;1607;1608;2023;2024;2098;2099	196;197;499;500;501;502;503;524;525;526;527;658;659;660;916;917;1512;1513;1548;1658;1761;1762;1887;1888;2344;2345;3150;3151;3152;3153;3154;3155;3922;3923;4094;4095;4096	196;501;524;658;916;1513;1548;1658;1761;1887;2344;2345;3150;3922;4095
sp|Q9HVA2|ILVC_PSEAE	sp|Q9HVA2|ILVC_PSEAE	4	4	4	>sp|Q9HVA2|ILVC_PSEAE Ketol-acid reductoisomerase OS=Pseudomonas aeruginosa (strain ATCC 15692 / PAO1 / 1C / PRS 101 / LMG 12228) GN=ilvC PE=1 SV=1	1	4	4	4	16.9	16.9	16.9	36.424	338	338	0	52.409	45572000	15				81	23;111;383;772	True;True;True;True	23;117;397;789	38;39;212;213;684;685;1354;1355	79;80;479;480;1368;1369;1370;1371;1372;1373;1374;2558;2559;2560;2561	79;479;1369;2558
sp|Q9HVC4|RL25_PSEAE	sp|Q9HVC4|RL25_PSEAE	2	2	2	>sp|Q9HVC4|RL25_PSEAE 50S ribosomal protein L25 OS=Pseudomonas aeruginosa (strain ATCC 15692 / PAO1 / 1C / PRS 101 / LMG 12228) GN=rplY PE=3 SV=1	1	2	2	2	12.3	12.3	12.3	21.962	204	204	0	12.878	12628000	3				82	204;1086	True;True	214;1108	383;1933;1934	850;3774;3775	850;3774
sp|Q9HVC5|KPRS_PSEAE	sp|Q9HVC5|KPRS_PSEAE	4	4	4	>sp|Q9HVC5|KPRS_PSEAE Ribose-phosphate pyrophosphokinase OS=Pseudomonas aeruginosa (strain ATCC 15692 / PAO1 / 1C / PRS 101 / LMG 12228) GN=prs PE=3 SV=1	1	4	4	4	16.6	16.6	16.6	34.04	313	313	0	30.997	7525600	4				83	560;793;891;1188	True;True;True;True	575;810;912;1212	976;1386;1570;2109	1845;2621;3090;4111	1845;2621;3090;4111
sp|Q9HVF1|MQO2_PSEAE	sp|Q9HVF1|MQO2_PSEAE	3	3	3	>sp|Q9HVF1|MQO2_PSEAE Probable malate:quinone oxidoreductase 2 OS=Pseudomonas aeruginosa (strain ATCC 15692 / PAO1 / 1C / PRS 101 / LMG 12228) GN=mqo2 PE=3 SV=1	1	3	3	3	10.8	10.8	10.8	55.498	507	507	0	20.761	9541000	3				84	1003;1083;1238	True;True;True	1025;1105;1262	1786;1927;1928;2191	3511;3767;3768;4323	3511;3767;4323
sp|Q9HVI7|GLYA3_PSEAE	sp|Q9HVI7|GLYA3_PSEAE	2	2	2	>sp|Q9HVI7|GLYA3_PSEAE Serine hydroxymethyltransferase 3 OS=Pseudomonas aeruginosa (strain ATCC 15692 / PAO1 / 1C / PRS 101 / LMG 12228) GN=glyA2 PE=3 SV=1	1	2	2	2	4.1	4.1	4.1	45.157	417	417	0	11.675	4357500	2				85	958;1063	True;True	979;1085	1681;1884	3268;3685	3268;3685
sp|Q9HVM4|SYI_PSEAE	sp|Q9HVM4|SYI_PSEAE	5	5	5	>sp|Q9HVM4|SYI_PSEAE Isoleucine--tRNA ligase OS=Pseudomonas aeruginosa (strain ATCC 15692 / PAO1 / 1C / PRS 101 / LMG 12228) GN=ileS PE=3 SV=1	1	5	5	5	8.3	8.3	8.3	105.46	943	943	0	40.746	28640000	15				86	156;291;364;652;941	True;True;True;True;True	165;303;378;667;962	288;289;531;532;651;652;1143;1653;1654;1655;1656	611;612;613;1119;1120;1121;1319;1320;2188;3223;3224;3225;3226;3227;3228	611;1119;1319;2188;3225
sp|Q9HVN5|CLPB_PSEAE	sp|Q9HVN5|CLPB_PSEAE	5	4	4	>sp|Q9HVN5|CLPB_PSEAE Chaperone protein ClpB OS=Pseudomonas aeruginosa (strain ATCC 15692 / PAO1 / 1C / PRS 101 / LMG 12228) GN=clpB PE=3 SV=1	1	5	4	4	8.2	6.7	6.7	95.004	854	854	0	22.606	2218900	4				87	33;44;380;848;1210	True;True;True;False;True	35;46;394;868;1234	68;87;680;1500;1501;2143	185;216;1361;2942;2943;2944;4166	185;216;1361;2942;4166
sp|Q9HVV3|Y4465_PSEAE	sp|Q9HVV3|Y4465_PSEAE	1	1	1	>sp|Q9HVV3|Y4465_PSEAE Nucleotide-binding protein PA4465 OS=Pseudomonas aeruginosa (strain ATCC 15692 / PAO1 / 1C / PRS 101 / LMG 12228) GN=PA4465 PE=3 SV=1	1	1	1	1	8	8	8	32.218	286	286	0	9.5091	3191700	3				88	939	TRUE	960	1650;1651	3218;3219;3220	3218
sp|Q9HW02|MURC_PSEAE	sp|Q9HW02|MURC_PSEAE	2	2	2	>sp|Q9HW02|MURC_PSEAE UDP-N-acetylmuramate--L-alanine ligase OS=Pseudomonas aeruginosa (strain ATCC 15692 / PAO1 / 1C / PRS 101 / LMG 12228) GN=murC PE=3 SV=1	1	2	2	2	5	5	5	51.981	480	480	0	14.31	3732600	3				89	425;692	True;True	439;708	750;1225;1226	1482;2325;2326	1482;2325
sp|Q9HWC5|RL11_PSEAE	sp|Q9HWC5|RL11_PSEAE	1	1	1	>sp|Q9HWC5|RL11_PSEAE 50S ribosomal protein L11 OS=Pseudomonas aeruginosa (strain ATCC 15692 / PAO1 / 1C / PRS 101 / LMG 12228) GN=rplK PE=3 SV=1	1	1	1	1	9.8	9.8	9.8	14.907	143	143	0	7.2624	1998300	1				90	868	TRUE	889	1535	3026	3026
sp|Q9HWC9|RPOC_PSEAE	sp|Q9HWC9|RPOC_PSEAE	26	26	26	>sp|Q9HWC9|RPOC_PSEAE DNA-directed RNA polymerase subunit beta OS=Pseudomonas aeruginosa (strain ATCC 15692 / PAO1 / 1C / PRS 101 / LMG 12228) GN=rpoC PE=3 SV=1	1	26	26	26	27.4	27.4	27.4	154.38	1399	1399	0	202.37	281260000	106				91	22;96;200;225;271;303;369;375;413;460;502;513;520;645;663;672;678;747;854;923;977;1068;1136;1144;1235;1236	True;True;True;True;True;True;True;True;True;True;True;True;True;True;True;True;True;True;True;True;True;True;True;True;True;True	22;100;101;209;236;283;316;383;389;427;474;516;527;535;660;678;687;693;764;875;944;999;1090;1158;1166;1259;1260	36;37;184;185;186;187;188;368;369;370;371;417;494;495;553;554;661;662;671;672;734;735;811;871;872;888;900;1131;1132;1163;1164;1180;1181;1191;1192;1193;1194;1195;1196;1197;1198;1199;1200;1313;1314;1516;1517;1625;1738;1739;1892;1893;2021;2022;2034;2186;2187;2188	76;77;78;431;432;433;434;435;436;437;438;439;440;441;442;443;444;746;747;748;749;750;751;752;753;754;755;756;757;758;759;760;761;762;763;764;765;766;767;918;919;1071;1072;1162;1163;1164;1332;1333;1334;1347;1348;1456;1457;1458;1589;1685;1686;1687;1688;1708;1724;2168;2169;2170;2171;2172;2173;2241;2242;2263;2264;2265;2266;2280;2281;2282;2283;2284;2285;2286;2287;2288;2289;2490;2491;2492;2991;2992;299…	76;431;746;918;1071;1162;1332;1348;1456;1589;1685;1708;1724;2172;2241;2263;2287;2490;2992;3183;3406;3698;3919;3936;4317;4318	12	596
sp|Q9HWD0|RS12_PSEAE	sp|Q9HWD0|RS12_PSEAE	2	2	2	>sp|Q9HWD0|RS12_PSEAE 30S ribosomal protein S12 OS=Pseudomonas aeruginosa (strain ATCC 15692 / PAO1 / 1C / PRS 101 / LMG 12228) GN=rpsL PE=3 SV=1	1	2	2	2	17.1	17.1	17.1	13.799	123	123	0	11.105	1692500	2				92	147;901	True;True	156;922	270;271;1584	582;583;3116	583;3116
sp|Q9HWD2|EFG1_PSEAE;sp|Q9I244|EFG2_PSEAE	sp|Q9HWD2|EFG1_PSEAE	20;6	20;6	20;6	>sp|Q9HWD2|EFG1_PSEAE Elongation factor G 1 OS=Pseudomonas aeruginosa (strain ATCC 15692 / PAO1 / 1C / PRS 101 / LMG 12228) GN=fusA PE=1 SV=1	2	20	20	20	43.3	43.3	43.3	77.784	706	706;702	0	225.74	354990000	115				93	43;51;145;152;249;341;412;419;441;442;473;610;643;768;834;966;1089;1205;1215;1237	True;True;True;True;True;True;True;True;True;True;True;True;True;True;True;True;True;True;True;True	45;53;154;161;260;355;426;433;455;456;487;625;658;785;854;988;1111;1229;1239;1261	83;84;85;86;99;100;267;281;282;457;458;618;732;733;742;776;777;778;779;780;781;828;829;1064;1065;1127;1128;1129;1347;1348;1477;1478;1697;1698;1939;1940;1941;2135;2136;2151;2152;2189;2190	207;208;209;210;211;212;213;214;215;243;244;245;246;247;575;599;600;601;993;994;995;1269;1270;1452;1453;1454;1455;1471;1520;1521;1522;1523;1524;1525;1526;1527;1528;1529;1530;1531;1532;1533;1534;1535;1536;1537;1538;1539;1540;1541;1542;1543;1544;1545;1546;1547;1608;1609;1610;1611;1612;1613;2024;2025;2026;2027;2028;2029;2156;2157;2158;2159;2160;2161;2162;2163;2164;2165;2166;2546;2547;2548;2549;2550;…	212;243;575;600;993;1269;1452;1471;1521;1544;1611;2024;2157;2546;2900;3305;3781;4152;4180;4322
sp|Q9HWD5|RL3_PSEAE	sp|Q9HWD5|RL3_PSEAE	2	2	2	>sp|Q9HWD5|RL3_PSEAE 50S ribosomal protein L3 OS=Pseudomonas aeruginosa (strain ATCC 15692 / PAO1 / 1C / PRS 101 / LMG 12228) GN=rplC PE=3 SV=1	1	2	2	2	14.2	14.2	14.2	22.591	211	211	0	17.544	30088000	10				94	495;1185	True;True	509;1209	862;863;2105;2106	1671;1672;1673;1674;1675;4104;4105;4106;4107;4108	1672;4108
sp|Q9HWD8|RL2_PSEAE	sp|Q9HWD8|RL2_PSEAE	3	3	3	>sp|Q9HWD8|RL2_PSEAE 50S ribosomal protein L2 OS=Pseudomonas aeruginosa (strain ATCC 15692 / PAO1 / 1C / PRS 101 / LMG 12228) GN=rplB PE=3 SV=1	1	3	3	3	14.3	14.3	14.3	29.579	273	273	0	27.357	47428000	13				95	148;251;435	True;True;True	157;262;449	272;273;274;275;460;766;767	584;585;586;587;588;589;997;998;1507;1508;1509;1510;1511	589;998;1511
sp|Q9HWE0|RL22_PSEAE	sp|Q9HWE0|RL22_PSEAE	1	1	1	>sp|Q9HWE0|RL22_PSEAE 50S ribosomal protein L22 OS=Pseudomonas aeruginosa (strain ATCC 15692 / PAO1 / 1C / PRS 101 / LMG 12228) GN=rplV PE=3 SV=1	1	1	1	1	11.8	11.8	11.8	11.911	110	110	0.0041152	6.2094	2418400	1				96	1100	TRUE	1122	1958	3814	3814
sp|Q9HWE2|RL16_PSEAE	sp|Q9HWE2|RL16_PSEAE	3	3	3	>sp|Q9HWE2|RL16_PSEAE 50S ribosomal protein L16 OS=Pseudomonas aeruginosa (strain ATCC 15692 / PAO1 / 1C / PRS 101 / LMG 12228) GN=rplP PE=3 SV=1	1	3	3	3	23.4	23.4	23.4	15.401	137	137	0	21.926	13756000	4				97	708;1139;1175	True;True;True	724;1161;1199	1252;2026;2027;2092	2374;3926;3927;4087	2374;3927;4087
sp|Q9HWE5|RL14_PSEAE	sp|Q9HWE5|RL14_PSEAE	4	4	4	>sp|Q9HWE5|RL14_PSEAE 50S ribosomal protein L14 OS=Pseudomonas aeruginosa (strain ATCC 15692 / PAO1 / 1C / PRS 101 / LMG 12228) GN=rplN PE=3 SV=1	1	4	4	4	36.9	36.9	36.9	13.412	122	122	0	37.09	32898000	8				98	305;493;783;1217	True;True;True;True	318;507;800;1241	556;557;859;1370;2154;2155	1166;1167;1168;1668;2597;4188;4189;4190	1167;1668;2597;4188
sp|Q9HWE9|RS8_PSEAE	sp|Q9HWE9|RS8_PSEAE	1	1	1	>sp|Q9HWE9|RS8_PSEAE 30S ribosomal protein S8 OS=Pseudomonas aeruginosa (strain ATCC 15692 / PAO1 / 1C / PRS 101 / LMG 12228) GN=rpsH PE=3 SV=1	1	1	1	1	9.2	9.2	9.2	14.17	130	130	0.0078431	5.9554	2635100	1				99	384	TRUE	398	686	1375	1375
sp|Q9HWF1|RL18_PSEAE	sp|Q9HWF1|RL18_PSEAE	2	2	2	>sp|Q9HWF1|RL18_PSEAE 50S ribosomal protein L18 OS=Pseudomonas aeruginosa (strain ATCC 15692 / PAO1 / 1C / PRS 101 / LMG 12228) GN=rplR PE=3 SV=1	1	2	2	2	18.1	18.1	18.1	12.661	116	116	0	12.094	2640400	3				100	3;1125	True;True	3;1147	4;2005	5;6;3898	6;3898
sp|Q9HWF2|RS5_PSEAE	sp|Q9HWF2|RS5_PSEAE	3	3	3	>sp|Q9HWF2|RS5_PSEAE 30S ribosomal protein S5 OS=Pseudomonas aeruginosa (strain ATCC 15692 / PAO1 / 1C / PRS 101 / LMG 12228) GN=rpsE PE=3 SV=1	1	3	3	3	26.5	26.5	26.5	17.625	166	166	0	41.364	32338000	9				101	158;845;1204	True;True;True	167;865;1228	292;293;1495;1496;2133;2134	616;617;618;2933;2934;4148;4149;4150;4151	618;2933;4148
sp|Q9HWF3|RL30_PSEAE	sp|Q9HWF3|RL30_PSEAE	1	1	1	>sp|Q9HWF3|RL30_PSEAE 50S ribosomal protein L30 OS=Pseudomonas aeruginosa (strain ATCC 15692 / PAO1 / 1C / PRS 101 / LMG 12228) GN=rpmD PE=1 SV=3	1	1	1	1	24.1	24.1	24.1	6.4775	58	58	0.0040486	6.094	486700	1				102	539	TRUE	554	928	1763	1763
[truncated: 155 more rows]

## Sheet: 3-2 proteinGroups  Probe 12
Protein IDs	Majority protein IDs	Peptide counts (all)	Peptide counts (razor+unique)	Peptide counts (unique)	Fasta headers	Number of proteins	Peptides	Razor + unique peptides	Unique peptides	Sequence coverage [%]	Unique + razor sequence coverage [%]	Unique sequence coverage [%]	Mol. weight [kDa]	Sequence length	Sequence lengths	Q-value	Score	Intensity	MS/MS Count	Only identified by site	Reverse	Potential contaminant	id	Peptide IDs	Peptide is razor	Mod. peptide IDs	Evidence IDs	MS/MS IDs	Best MS/MS	Oxidation (M) site IDs	Oxidation (M) site positions
[truncated: 313 more rows]

[truncated: 6 more sheets: 3-2 Sheet1, 3-2 Sheet2, 3-3 proteinGroups C4HSL-1, 3-3 proteinGroups Probe 12, 3-3 Sheet1, 3-3 Sheet2]
