# Supplementary material for: Short-chain reactive probes as tools to unravel the Pseudomonas aeruginosa quorum sensing regulon
Source: Royal Society of Chemistry journal article supplement (doi:10.1039/d0sc04444j), 2021-01-01
Supplement: d0sc04444j2.zip [file Experiment 4.xlsx]

## Sheet: Key
Experiment 4	Chemical proteomics with Probe 12: Identification of proteins after incubation and photoaffinity labeling with Probe 12 in wild-type P. aeruginosa strain PAO1
Experimental methods	Yellow, Green and Blue sheets are independent biological replicates: Bacteria were grown, harvested, lysed, the lysates were incubated with C4HSL/Probe 12 in triplicates and labeled, downstream processed, streptavidin affinity enriched and trypticaly digested on the same day. StageTips desalting was done on the next day and LC-MS/MS analysis was performed later
Excel sheets content
4-1 proteinGroups C4HSL-1	Experiment 4 repeat 1 Raw data results of C4HSL control labeling
4-1 proteinGroups Probe 12	Experiment 4 repeat 1 Raw data results of Probe 12 labeling
4-1 Sheet1	Experiment 4 repeat 1: C4HSL results and unique Probe 12 results (C4HSL hits are subtracted)
4-1 Sheet2	Experiment 4 repeat 1: Filtered data of proteins for Probe 12 labeling which retain razor+unique peptides requirement of >1 for each replicate (filled with green)
For Green and Blue sheets-same as above only repeat experiment number changes (4-2, 4-3)

## Sheet: 4-1 proteinGroups C4HSL-1
Protein IDs	Majority protein IDs	Peptide counts (all)	Peptide counts (razor+unique)	Peptide counts (unique)	Fasta headers	Number of proteins	Peptides	Razor + unique peptides	Unique peptides	Sequence coverage [%]	Unique + razor sequence coverage [%]	Unique sequence coverage [%]	Mol. weight [kDa]	Sequence length	Sequence lengths	Q-value	Score	Intensity	MS/MS Count	Only identified by site	Reverse	Potential contaminant	id	Peptide IDs	Peptide is razor	Mod. peptide IDs	Evidence IDs	MS/MS IDs	Best MS/MS	Oxidation (M) site IDs	Oxidation (M) site positions
CON__P00761	CON__P00761	4	4	4	>P00761 SWISS-PROT:P00761|TRYP_PIG Trypsin - Sus scrofa (Pig).	1	4	4	4	25.1	25.1	25.1	24.409	231	231	0	59.884	583850000	49			+	0	635;780;865;1296	True;True;True;True	639;786;871;1309	1122;1123;1124;1386;1387;1388;1389;1390;1543;2312;2313;2314	2102;2103;2104;2105;2106;2107;2600;2601;2602;2603;2604;2605;2606;2607;2608;2609;2610;2611;2612;2613;2614;2615;2616;2617;2879;2880;2881;2882;4320;4321;4322;4323;4324;4325;4326;4327;4328;4329;4330;4331;4332;4333;4334;4335;4336;4337;4338;4339;4340;4341;4342	2106;2607;2880;4334
CON__Streptavidin	CON__Streptavidin	7	7	7	>Streptavidin (S.avidinii)	1	7	7	7	49.4	49.4	49.4	16.622	160	160	0	120.09	1463500000	118			+	1	670;671;985;1172;1460;1461;1497	True;True;True;True;True;True;True	675;676;995;1184;1473;1474;1510	1186;1187;1188;1189;1190;1191;1192;1193;1194;1195;1196;1197;1198;1769;1770;1771;1772;1773;2084;2085;2086;2087;2088;2089;2090;2600;2601;2602;2657	2207;2208;2209;2210;2211;2212;2213;2214;2215;2216;2217;2218;2219;2220;2221;2222;2223;2224;2225;2226;2227;2228;2229;2230;2231;2232;2233;2234;2235;2236;2237;2238;2239;2240;2241;2242;2243;2244;2245;2246;2247;2248;2249;2250;2251;2252;2253;2254;2255;2256;2257;2258;3308;3309;3310;3311;3312;3313;3314;3315;3316;3317;3318;3319;3320;3321;3322;3323;3324;3325;3326;3327;3328;3329;3330;3331;3332;3333;3334;3335…	2209;2255;3324;3867;4797;4801;4901
REV__sp|Q9I383|SELD_PSEAE	REV__sp|Q9I383|SELD_PSEAE	1	1	1	>sp|Q9I383|SELD_PSEAE Selenide, water dikinase OS=Pseudomonas aeruginosa (strain ATCC 15692 / PAO1 / 1C / PRS 101 / LMG 12228) GN=selD PE=3 SV=1	1	1	1	1	0	0	0	36.353	344	344	0.0099668	5.5417	11229000	2		+		2	848	TRUE	854	1515;1516	2839;2840	2839
REV__tr|Q9HWT4|Q9HWT4_PSEAE	REV__tr|Q9HWT4|Q9HWT4_PSEAE	1	1	1	>tr|Q9HWT4|Q9HWT4_PSEAE Probable transcriptional regulator OS=Pseudomonas aeruginosa (strain ATCC 15692 / PAO1 / 1C / PRS 101 / LMG 12228) GN=PA4094 PE=4 SV=1	1	1	1	1	0	0	0	35.912	319	319	0.0034965	5.7232	825190	1		+		3	860	TRUE	866	1535	2865	2865
REV__tr|Q9HXW2|Q9HXW2_PSEAE	REV__tr|Q9HXW2|Q9HXW2_PSEAE	1	1	1	>tr|Q9HXW2|Q9HXW2_PSEAE Probable transcriptional regulator OS=Pseudomonas aeruginosa (strain ATCC 15692 / PAO1 / 1C / PRS 101 / LMG 12228) GN=PA3678 PE=4 SV=1	1	1	1	1	0	0	0	23.15	212	212	0.0069444	5.6745	110070000	13		+		4	730	TRUE	736	1303;1304	2453;2454;2455;2456;2457;2458;2459;2460;2461;2462;2463;2464;2465	2462
sp|G3XD12|HCNC_PSEAE	sp|G3XD12|HCNC_PSEAE	2	2	2	>sp|G3XD12|HCNC_PSEAE Hydrogen cyanide synthase subunit HcnC OS=Pseudomonas aeruginosa (strain ATCC 15692 / PAO1 / 1C / PRS 101 / LMG 12228) GN=hcnC PE=1 SV=1	1	2	2	2	13.7	13.7	13.7	45.281	417	417	0	19.374	7572700	8				5	305;1231	True;True	307;1243	544;2202;2203;2204	1124;1125;4129;4130;4131;4132;4133;4134	1124;4132
sp|G3XD23|WBPB_PSEAE	sp|G3XD23|WBPB_PSEAE	3	3	3	>sp|G3XD23|WBPB_PSEAE UDP-N-acetyl-2-amino-2-deoxy-D-glucuronate oxidase OS=Pseudomonas aeruginosa (strain ATCC 15692 / PAO1 / 1C / PRS 101 / LMG 12228) GN=wbpB PE=1 SV=1	1	3	3	3	12.7	12.7	12.7	35.717	316	316	0	24.519	59360000	13				6	8;910;1097	True;True;True	8;917;1108	10;11;1618;1619;1949;1950;1951	11;12;13;14;15;3043;3044;3045;3046;3643;3644;3645;3646	11;3044;3645
sp|G3XD61|WBPI_PSEAE	sp|G3XD61|WBPI_PSEAE	7	7	7	>sp|G3XD61|WBPI_PSEAE UDP-2,3-diacetamido-2,3-dideoxy-D-glucuronate 2-epimerase OS=Pseudomonas aeruginosa (strain ATCC 15692 / PAO1 / 1C / PRS 101 / LMG 12228) GN=wbpI PE=1 SV=1	1	7	7	7	31.4	31.4	31.4	38.907	354	354	0	73.914	66867000	18				7	197;705;797;946;1121;1222;1375	True;True;True;True;True;True;True	198;711;803;954;1132;1234;1388	349;350;1249;1250;1251;1424;1687;1688;1992;2186;2187;2453	675;676;677;678;679;680;2352;2353;2354;2355;2356;2357;2688;3169;3170;3706;4107;4108;4576	675;2352;2688;3170;3706;4108;4576
sp|G3XD76|DAPD_PSEAE	sp|G3XD76|DAPD_PSEAE	2	2	2	>sp|G3XD76|DAPD_PSEAE 2,3,4,5-tetrahydropyridine-2,6-dicarboxylate N-succinyltransferase OS=Pseudomonas aeruginosa (strain ATCC 15692 / PAO1 / 1C / PRS 101 / LMG 12228) GN=dapD PE=1 SV=1	1	2	2	2	7	7	7	35.973	344	344	0	11.656	27371000	4				8	498;1288	True;True	502;1301	890;891;2299;2300	1711;1712;1713;1714;4296;4297	1712;4296
sp|G3XD94|UGND_PSEAE	sp|G3XD94|UGND_PSEAE	9	9	9	>sp|G3XD94|UGND_PSEAE UDP-N-acetyl-D-glucosamine 6-dehydrogenase OS=Pseudomonas aeruginosa (strain ATCC 15692 / PAO1 / 1C / PRS 101 / LMG 12228) GN=wbpA PE=1 SV=1	1	9	9	9	27.8	27.8	27.8	48.155	436	436	0	63.839	55859000	19				9	175;208;310;370;418;829;938;1049;1390	True;True;True;True;True;True;True;True;True	176;209;312;372;421;835;946;1060;1403	314;315;369;370;554;659;660;744;1481;1482;1673;1674;1875;2485;2486	620;621;702;703;704;705;706;1143;1337;1338;1339;1471;2795;2796;3150;3151;3523;4629;4630	621;706;1143;1339;1471;2796;3151;3523;4629
sp|O30508|ARUC_PSEAE	sp|O30508|ARUC_PSEAE	4	4	4	>sp|O30508|ARUC_PSEAE Succinylornithine transaminase/acetylornithine aminotransferase OS=Pseudomonas aeruginosa (strain ATCC 15692 / PAO1 / 1C / PRS 101 / LMG 12228) GN=aruC PE=1 SV=2	1	4	4	4	23.2	23.2	23.2	43.747	406	406	0	38.97	24888000	6				10	578;1137;1310;1323	True;True;True;True	582;1148;1323;1336	1028;2020;2021;2339;2340;2360	1960;3744;3745;4382;4383;4384;4385;4419	1960;3745;4385;4419
sp|O52759|RS4_PSEAE	sp|O52759|RS4_PSEAE	6	6	6	>sp|O52759|RS4_PSEAE 30S ribosomal protein S4 OS=Pseudomonas aeruginosa (strain ATCC 15692 / PAO1 / 1C / PRS 101 / LMG 12228) GN=rpsD PE=3 SV=2	1	6	6	6	25.2	25.2	25.2	23.277	206	206	0	52.5	128400000	19				11	96;710;761;862;1083;1307	True;True;True;True;True;True	97;716;767;868;1094;1320	178;179;1261;1352;1353;1538;1539;1924;2332;2333;2334;2335	387;388;389;390;391;2378;2537;2538;2539;2868;2869;2870;2871;2872;2873;3612;4374;4375;4376;4377	388;2378;2537;2872;3612;4376
sp|O52760|RPOA_PSEAE	sp|O52760|RPOA_PSEAE	9	9	9	>sp|O52760|RPOA_PSEAE DNA-directed RNA polymerase subunit alpha OS=Pseudomonas aeruginosa (strain ATCC 15692 / PAO1 / 1C / PRS 101 / LMG 12228) GN=rpoA PE=3 SV=2	1	9	9	9	23.7	23.7	23.7	36.649	333	333	0	59.534	89664000	19				12	40;98;576;693;856;857;966;1145;1403	True;True;True;True;True;True;True;True;True	40;99;580;698;862;863;974;1156;1416	69;70;182;1023;1024;1228;1529;1530;1531;1723;1724;2037;2038;2039;2040;2041;2504;2505	117;118;394;1954;1955;2309;2857;2858;2859;3229;3230;3231;3232;3771;3772;3773;3774;3775;4656;4657	118;394;1954;2309;2857;2858;3230;3773;4656
sp|O52761|RL17_PSEAE	sp|O52761|RL17_PSEAE	1	1	1	>sp|O52761|RL17_PSEAE 50S ribosomal protein L17 OS=Pseudomonas aeruginosa (strain ATCC 15692 / PAO1 / 1C / PRS 101 / LMG 12228) GN=rplQ PE=3 SV=1	1	1	1	1	13.2	13.2	13.2	14.504	129	129	0	5.9532	11848000	2				13	136	TRUE	137	249;250	509;510	509
sp|O52762|CATA_PSEAE	sp|O52762|CATA_PSEAE	10	10	10	>sp|O52762|CATA_PSEAE Catalase OS=Pseudomonas aeruginosa (strain ATCC 15692 / PAO1 / 1C / PRS 101 / LMG 12228) GN=katA PE=1 SV=1	1	10	10	10	24.7	24.7	24.7	55.588	482	482	0	92.988	91121000	25				14	267;443;535;538;550;770;880;881;982;1487	True;True;True;True;True;True;True;True;True;True	269;447;539;542;554;776;886;887;992;1500	480;790;957;958;962;963;964;980;981;1368;1369;1567;1568;1569;1763;1764;2642	1000;1560;1816;1817;1818;1819;1820;1821;1822;1826;1827;1828;1829;1830;1831;1857;1858;2556;2557;2558;2559;2921;2922;2923;3301;3302;4877	1000;1560;1816;1830;1857;2558;2921;2923;3302;4877
sp|O54439|ACP1_PSEAE	sp|O54439|ACP1_PSEAE	3	3	3	>sp|O54439|ACP1_PSEAE Acyl carrier protein 1 OS=Pseudomonas aeruginosa (strain ATCC 15692 / PAO1 / 1C / PRS 101 / LMG 12228) GN=acpP1 PE=3 SV=4	1	3	3	3	35.9	35.9	35.9	8.7406	78	78	0	30.512	58715000	15				15	36;696;697	True;True;True	36;702;703	61;62;1234;1235;1236;1237;1238;1239	105;106;107;2326;2327;2328;2329;2330;2331;2332;2333;2334;2335;2336;2337	105;2327;2337
sp|O68822|AMPA_PSEAE	sp|O68822|AMPA_PSEAE	18	18	18	>sp|O68822|AMPA_PSEAE Cytosol aminopeptidase OS=Pseudomonas aeruginosa (strain ATCC 15692 / PAO1 / 1C / PRS 101 / LMG 12228) GN=pepA PE=3 SV=1	1	18	18	18	42.2	42.2	42.2	52.331	495	495	0	164.2	381190000	64				16	55;202;203;303;351;352;510;515;516;721;751;807;827;828;874;1196;1331;1332	True;True;True;True;True;True;True;True;True;True;True;True;True;True;True;True;True;True	55;203;204;305;353;354;514;519;520;727;757;813;833;834;880;1208;1344;1345	97;357;358;359;360;361;540;541;624;625;626;627;912;913;924;925;926;927;928;1289;1339;1340;1444;1445;1476;1477;1478;1479;1480;1557;2137;2138;2373;2374;2375;2376	169;170;687;688;689;690;691;692;1114;1115;1116;1117;1118;1277;1278;1279;1280;1281;1282;1744;1745;1772;1773;1774;1775;1776;1777;2436;2519;2520;2723;2724;2725;2726;2727;2728;2779;2780;2781;2782;2783;2784;2785;2786;2787;2788;2789;2790;2791;2792;2793;2794;2909;3975;3976;3977;4436;4437;4438;4439;4440;4441;4442;4443;4444	169;688;692;1114;1278;1282;1745;1772;1777;2436;2520;2726;2784;2793;2909;3977;4437;4444
sp|O69754|PHZF_PSEAE	sp|O69754|PHZF_PSEAE	5	5	5	>sp|O69754|PHZF_PSEAE Trans-2,3-dihydro-3-hydroxyanthranilate isomerase OS=Pseudomonas aeruginosa (strain ATCC 15692 / PAO1 / 1C / PRS 101 / LMG 12228) GN=phzF1 PE=3 SV=2	1	5	5	5	30.2	30.2	30.2	30.342	278	278	0	36.39	42945000	7				17	366;542;929;935;1398	True;True;True;True;True	368;546;937;943;1411	652;968;1656;1657;1668;1669;2498	1328;1837;3127;3128;3129;3144;3145;4648	1328;1837;3127;3145;4648
sp|O82850|RS2_PSEAE	sp|O82850|RS2_PSEAE	2	2	2	>sp|O82850|RS2_PSEAE 30S ribosomal protein S2 OS=Pseudomonas aeruginosa (strain ATCC 15692 / PAO1 / 1C / PRS 101 / LMG 12228) GN=rpsB PE=3 SV=2	1	2	2	2	9.8	9.8	9.8	27.336	246	246	0	19.402	46422000	11				18	1232;1446	True;True	1244;1459	2205;2206;2573;2574	4135;4136;4137;4138;4139;4140;4141;4755;4756;4757;4758	4139;4755
sp|O82851|EFTS_PSEAE	sp|O82851|EFTS_PSEAE	4	4	4	>sp|O82851|EFTS_PSEAE Elongation factor Ts OS=Pseudomonas aeruginosa (strain ATCC 15692 / PAO1 / 1C / PRS 101 / LMG 12228) GN=tsf PE=3 SV=1	1	4	4	4	19	19	19	30.653	289	289	0	23.847	15924000	6				19	35;424;627;872	True;True;True;True	35;427;631;878	60;753;1108;1554;1555	104;1482;1483;2084;2906;2907	104;1483;2084;2906
sp|O86428|ILVE_PSEAE	sp|O86428|ILVE_PSEAE	2	2	2	>sp|O86428|ILVE_PSEAE Branched-chain-amino-acid aminotransferase OS=Pseudomonas aeruginosa (strain ATCC 15692 / PAO1 / 1C / PRS 101 / LMG 12228) GN=ilvE PE=1 SV=2	1	2	2	2	6.8	6.8	6.8	34.084	307	307	0	15.734	16749000	4				20	216;219	True;True	217;220	382;383;387	733;734;735;744	735;744
sp|O87125|CHEB1_PSEAE	sp|O87125|CHEB1_PSEAE	3	3	3	>sp|O87125|CHEB1_PSEAE Chemotaxis response regulator protein-glutamate methylesterase of group 1 operon OS=Pseudomonas aeruginosa (strain ATCC 15692 / PAO1 / 1C / PRS 101 / LMG 12228) GN=cheB1 PE=1 SV=2	1	3	3	3	15.8	15.8	15.8	39.004	368	368	0	21.759	6282800	4				21	883;1313;1373	True;True;True	889;1326;1386	1571;2345;2451	2925;4392;4573;4574	2925;4392;4573
sp|P04739|FMPO_PSEAE	sp|P04739|FMPO_PSEAE	3	3	3	>sp|P04739|FMPO_PSEAE Fimbrial protein OS=Pseudomonas aeruginosa (strain ATCC 15692 / PAO1 / 1C / PRS 101 / LMG 12228) GN=pilA PE=1 SV=1	1	3	3	3	22.1	22.1	22.1	15.512	149	149	0	20.623	29711000	8				22	1104;1105;1173	True;True;True	1115;1116;1185	1961;1962;1963;1964;2091;2092	3661;3662;3663;3664;3665;3666;3869;3870	3661;3665;3870
sp|P07345|TRPB_PSEAE	sp|P07345|TRPB_PSEAE	1	1	1	>sp|P07345|TRPB_PSEAE Tryptophan synthase beta chain OS=Pseudomonas aeruginosa (strain ATCC 15692 / PAO1 / 1C / PRS 101 / LMG 12228) GN=trpB PE=3 SV=2	1	1	1	1	4.7	4.7	4.7	43.68	402	402	0	5.7239	1449600	0				23	413	TRUE	416	736;737	1458;1459	1459
sp|P08280|RECA_PSEAE	sp|P08280|RECA_PSEAE	3	3	3	>sp|P08280|RECA_PSEAE Protein RecA OS=Pseudomonas aeruginosa (strain ATCC 15692 / PAO1 / 1C / PRS 101 / LMG 12228) GN=recA PE=3 SV=1	1	3	3	3	12.4	12.4	12.4	36.879	346	346	0	21.606	7254700	3				24	99;1152;1482	True;True;True	100;1163;1495	183;2051;2634	395;3794;4855	395;3794;4855
sp|P08308|OTCC_PSEAE	sp|P08308|OTCC_PSEAE	11	11	11	>sp|P08308|OTCC_PSEAE Ornithine carbamoyltransferase, catabolic OS=Pseudomonas aeruginosa (strain ATCC 15692 / PAO1 / 1C / PRS 101 / LMG 12228) GN=arcB PE=1 SV=3	1	11	11	11	42.3	42.3	42.3	38.108	336	336	0	85.158	434490000	68				25	91;354;394;478;639;875;981;1004;1024;1058;1485	True;True;True;True;True;True;True;True;True;True;True	92;356;396;397;482;643;881;991;1014;1034;1035;1069;1498	171;630;631;705;706;707;708;854;855;856;857;1130;1131;1132;1133;1558;1559;1761;1762;1804;1805;1838;1839;1840;1890;2638;2639	379;1289;1290;1291;1408;1409;1410;1411;1412;1413;1414;1415;1416;1417;1418;1419;1420;1421;1422;1423;1424;1653;1654;1655;1656;1657;1658;1659;1660;2114;2115;2116;2117;2118;2119;2910;2911;3295;3296;3297;3298;3299;3300;3389;3390;3391;3392;3393;3447;3448;3449;3450;3451;3452;3453;3454;3455;3456;3457;3458;3549;4860;4861;4862;4863;4864;4865;4866;4867	379;1289;1412;1658;2118;2910;3296;3392;3448;3549;4861	0;1	146;169
sp|P09591|EFTU_PSEAE	sp|P09591|EFTU_PSEAE	29	29	29	>sp|P09591|EFTU_PSEAE Elongation factor Tu OS=Pseudomonas aeruginosa (strain ATCC 15692 / PAO1 / 1C / PRS 101 / LMG 12228) GN=tufA PE=1 SV=2	1	29	29	29	69.8	69.8	69.8	43.369	397	397	0	290.7	2593100000	388				26	29;51;57;58;84;171;230;231;258;259;332;403;504;511;537;570;811;891;892;975;976;1010;1073;1074;1258;1260;1266;1388;1389	True;True;True;True;True;True;True;True;True;True;True;True;True;True;True;True;True;True;True;True;True;True;True;True;True;True;True;True;True	29;51;57;58;84;85;172;231;232;259;260;261;334;406;508;515;541;574;817;897;898;899;984;985;986;1020;1084;1085;1271;1273;1279;1401;1402	48;49;50;89;90;99;100;101;102;103;104;151;152;153;154;155;156;157;158;159;307;308;406;407;408;409;457;458;459;460;461;462;463;464;465;466;593;594;721;722;903;904;905;906;914;915;916;917;918;961;1013;1014;1015;1016;1017;1452;1581;1582;1583;1584;1585;1586;1742;1743;1744;1745;1746;1747;1748;1749;1750;1751;1752;1753;1811;1910;1911;1912;1913;2250;2251;2254;2255;2264;2265;2480;2481;2482;2483;2484	84;85;86;87;88;89;154;155;156;157;172;173;174;175;176;177;178;179;180;181;182;183;184;185;186;187;188;189;190;191;192;193;194;195;196;197;292;293;294;295;296;297;298;299;300;301;302;303;304;305;306;307;308;309;310;311;312;313;314;315;316;317;318;319;320;321;322;323;324;325;326;327;328;329;330;331;332;333;334;335;336;337;338;339;340;341;342;343;344;345;346;347;348;349;350;351;352;353;354;355;356;3…	84;154;176;197;312;611;794;796;901;952;1220;1442;1736;1763;1825;1937;2739;2941;2964;3269;3282;3399;3590;3594;4216;4225;4242;4615;4626	2;3;4;5	177;216;362;372
sp|P11221|OPRI_PSEAE	sp|P11221|OPRI_PSEAE	6	6	6	>sp|P11221|OPRI_PSEAE Major outer membrane lipoprotein OS=Pseudomonas aeruginosa (strain ATCC 15692 / PAO1 / 1C / PRS 101 / LMG 12228) GN=oprI PE=3 SV=1	1	6	6	6	50.6	50.6	50.6	8.8348	83	83	0	57.427	200640000	42				27	22;23;712;713;870;871	True;True;True;True;True;True	22;23;718;719;876;877	34;35;36;37;38;39;1264;1265;1266;1267;1268;1269;1549;1550;1551;1552;1553	59;60;61;62;63;64;65;66;67;68;69;2381;2382;2383;2384;2385;2386;2387;2388;2389;2390;2391;2392;2393;2888;2889;2890;2891;2892;2893;2894;2895;2896;2897;2898;2899;2900;2901;2902;2903;2904;2905	61;64;2382;2388;2894;2905
sp|P11436|AMIE_PSEAE	sp|P11436|AMIE_PSEAE	3	3	3	>sp|P11436|AMIE_PSEAE Aliphatic amidase OS=Pseudomonas aeruginosa (strain ATCC 15692 / PAO1 / 1C / PRS 101 / LMG 12228) GN=amiE PE=1 SV=2	1	3	3	3	9.8	9.8	9.8	38.494	346	346	0	17.304	2385600	3				28	156;571;854	True;True;True	157;575;860	282;1018;1526	564;1947;2852	564;1947;2852
sp|P13794|PORF_PSEAE	sp|P13794|PORF_PSEAE	7	7	7	>sp|P13794|PORF_PSEAE Outer membrane porin F OS=Pseudomonas aeruginosa (strain ATCC 15692 / PAO1 / 1C / PRS 101 / LMG 12228) GN=oprF PE=1 SV=1	1	7	7	7	24.3	24.3	24.3	37.639	350	350	0	59.868	120370000	37				29	283;284;369;1076;1298;1346;1379	True;True;True;True;True;True;True	285;286;371;1087;1311;1359;1392	506;507;508;509;656;657;658;1916;1917;2317;2318;2403;2404;2459;2460;2461	1039;1040;1041;1042;1043;1044;1045;1046;1047;1048;1049;1334;1335;1336;3602;3603;3604;3605;4345;4346;4347;4348;4349;4350;4351;4352;4353;4354;4355;4491;4492;4493;4584;4585;4586;4587;4588	1040;1047;1336;3603;4346;4492;4585
sp|P13981|ARCA_PSEAE	sp|P13981|ARCA_PSEAE	29	29	29	>sp|P13981|ARCA_PSEAE Arginine deiminase OS=Pseudomonas aeruginosa (strain ATCC 15692 / PAO1 / 1C / PRS 101 / LMG 12228) GN=arcA PE=1 SV=2	1	29	29	29	54.8	54.8	54.8	46.435	418	418	0	323.31	1495300000	256				30	77;247;266;316;317;339;340;373;387;500;501;690;691;714;717;718;720;737;861;1036;1048;1055;1079;1088;1185;1209;1210;1345;1413	True;True;True;True;True;True;True;True;True;True;True;True;True;True;True;True;True;True;True;True;True;True;True;True;True;True;True;True;True	77;248;268;318;319;341;342;375;389;504;505;695;696;720;723;724;726;743;867;1047;1059;1066;1090;1099;1197;1221;1222;1358;1426	136;137;437;438;478;479;562;563;564;565;566;567;568;604;605;606;664;665;690;691;692;693;894;895;896;897;898;899;1222;1223;1224;1225;1270;1271;1272;1273;1274;1278;1279;1280;1281;1282;1283;1285;1286;1287;1288;1316;1317;1318;1536;1537;1856;1857;1873;1874;1884;1885;1920;1932;1933;2118;2119;2163;2164;2165;2166;2167;2168;2169;2170;2400;2401;2402;2522;2523	260;261;262;263;264;265;851;852;853;854;855;856;857;858;859;860;861;862;992;993;994;995;996;997;998;999;1152;1153;1154;1155;1156;1157;1158;1159;1160;1161;1162;1163;1164;1165;1166;1167;1168;1169;1233;1234;1235;1236;1237;1238;1239;1240;1241;1242;1243;1343;1344;1345;1346;1347;1376;1377;1378;1379;1380;1381;1382;1383;1384;1385;1386;1387;1388;1389;1390;1391;1392;1717;1718;1719;1720;1721;1722;1723;1724;…	264;858;993;1163;1166;1238;1243;1345;1383;1727;1730;2292;2305;2394;2411;2413;2428;2487;2866;3484;3512;3538;3608;3624;3931;4040;4062;4485;4681
sp|P13982|ARCC_PSEAE	sp|P13982|ARCC_PSEAE	3	3	3	>sp|P13982|ARCC_PSEAE Carbamate kinase OS=Pseudomonas aeruginosa (strain ATCC 15692 / PAO1 / 1C / PRS 101 / LMG 12228) GN=arcC PE=3 SV=1	1	3	3	3	14.2	14.2	14.2	33.08	310	310	0	20.154	21114000	7				31	82;188;783	True;True;True	82;189;789	146;333;334;1394;1395	281;645;646;2622;2623;2624;2625	281;646;2624
sp|P14165|CISY_PSEAE	sp|P14165|CISY_PSEAE	7	7	7	>sp|P14165|CISY_PSEAE Citrate synthase OS=Pseudomonas aeruginosa (strain ATCC 15692 / PAO1 / 1C / PRS 101 / LMG 12228) GN=gltA PE=3 SV=2	1	7	7	7	25.9	25.9	25.9	47.694	428	428	0	45.908	70965000	21				32	86;470;569;740;941;962;1020	True;True;True;True;True;True;True	87;474;573;746;949;970;1030	162;163;841;842;1011;1012;1323;1679;1680;1716;1717;1830	367;368;369;370;371;1635;1636;1917;1918;1919;2496;3157;3158;3217;3218;3219;3220;3221;3222;3434;3435	367;1635;1919;2496;3157;3220;3434
sp|P15276|ALGP_PSEAE	sp|P15276|ALGP_PSEAE	1	1	1	>sp|P15276|ALGP_PSEAE Transcriptional regulatory protein AlgP OS=Pseudomonas aeruginosa (strain ATCC 15692 / PAO1 / 1C / PRS 101 / LMG 12228) GN=algP PE=4 SV=2	1	1	1	1	4	4	4	34.49	352	352	0	6.1323	3040400	1				33	286	TRUE	288	511	1051	1051
sp|P20582|PQSD_PSEAE	sp|P20582|PQSD_PSEAE	2	2	2	>sp|P20582|PQSD_PSEAE 2-heptyl-4(1H)-quinolone synthase PqsD OS=Pseudomonas aeruginosa (strain ATCC 15692 / PAO1 / 1C / PRS 101 / LMG 12228) GN=pqsD PE=1 SV=2	1	2	2	2	7.4	7.4	7.4	36.378	337	337	0	17.068	21861000	4				34	533;672	True;True	537;677	954;955;1199;1200	1813;1814;2259;2260;2261	1814;2259
sp|P26276|ALGC_PSEAE	sp|P26276|ALGC_PSEAE	1	1	1	>sp|P26276|ALGC_PSEAE Phosphomannomutase/phosphoglucomutase OS=Pseudomonas aeruginosa (strain ATCC 15692 / PAO1 / 1C / PRS 101 / LMG 12228) GN=algC PE=1 SV=4	1	1	1	1	3.7	3.7	3.7	50.295	463	463	0	5.7699	2629600	1				35	561	TRUE	565	999	1894	1894
sp|P29363|THRC_PSEAE	sp|P29363|THRC_PSEAE	2	2	2	>sp|P29363|THRC_PSEAE Threonine synthase OS=Pseudomonas aeruginosa (strain ATCC 15692 / PAO1 / 1C / PRS 101 / LMG 12228) GN=thrC PE=3 SV=3	1	2	2	2	6.8	6.8	6.8	51.795	469	469	0	11.559	9939500	3				36	884;1177	True;True	890;1189	1572;2101;2102	2926;3893;3894	2926;3894
sp|P29365|DHOM_PSEAE	sp|P29365|DHOM_PSEAE	4	4	4	>sp|P29365|DHOM_PSEAE Homoserine dehydrogenase OS=Pseudomonas aeruginosa (strain ATCC 15692 / PAO1 / 1C / PRS 101 / LMG 12228) GN=hom PE=3 SV=2	1	4	4	4	14.1	14.1	14.1	46.223	434	434	0	30.829	13144000	2				37	249;503;673;878	True;True;True;True	250;507;678;884	441;902;1201;1562;1563	866;1734;2262;2914;2915	866;1734;2262;2914
sp|P30718|CH60_PSEAE	sp|P30718|CH60_PSEAE	25	25	25	>sp|P30718|CH60_PSEAE 60 kDa chaperonin OS=Pseudomonas aeruginosa (strain ATCC 15692 / PAO1 / 1C / PRS 101 / LMG 12228) GN=groL PE=1 SV=3	1	25	25	25	61.6	61.6	61.6	57.085	547	547	0	202.35	399420000	108				38	19;73;83;126;127;141;142;146;147;148;200;255;279;364;406;568;739;954;1057;1059;1063;1064;1111;1280;1311	True;True;True;True;True;True;True;True;True;True;True;True;True;True;True;True;True;True;True;True;True;True;True;True;True	19;73;83;127;128;142;143;147;148;149;201;256;281;366;409;572;745;962;1068;1070;1074;1075;1122;1293;1324	27;28;127;128;129;147;148;149;150;232;233;234;235;258;259;260;261;265;266;267;268;269;270;271;355;451;452;502;648;649;725;726;1009;1010;1321;1322;1701;1702;1888;1889;1891;1895;1896;1897;1974;2287;2341;2342	45;46;47;48;49;50;51;52;240;241;242;243;244;245;246;247;248;249;250;251;252;282;283;284;285;286;287;288;289;290;291;483;484;485;486;487;488;520;521;522;523;524;525;526;527;531;532;533;534;535;536;537;538;539;540;541;542;543;544;545;546;547;548;549;685;883;884;885;1035;1317;1318;1319;1445;1446;1907;1908;1909;1910;1911;1912;1913;1914;1915;1916;2494;2495;3193;3194;3195;3196;3197;3198;3543;3544;3545;…	46;244;283;483;487;521;527;539;543;546;685;885;1035;1317;1445;1909;2495;3197;3546;3550;3556;3558;3677;4279;4386
sp|P37798|ACCC_PSEAE	sp|P37798|ACCC_PSEAE	6	6	6	>sp|P37798|ACCC_PSEAE Biotin carboxylase OS=Pseudomonas aeruginosa (strain ATCC 15692 / PAO1 / 1C / PRS 101 / LMG 12228) GN=accC PE=1 SV=1	1	6	6	6	20.5	20.5	20.5	48.887	449	449	0	59.713	135350000	25				39	79;1119;1202;1339;1344;1428	True;True;True;True;True;True	79;1130;1214;1352;1357;1441	139;140;141;1988;1989;2147;2148;2389;2390;2398;2399;2541;2542	267;268;269;270;3700;3701;3702;3703;4011;4012;4013;4014;4015;4468;4469;4470;4471;4472;4473;4483;4484;4709;4710;4711;4712	268;3701;4011;4469;4483;4711
sp|P37799|BCCP_PSEAE	sp|P37799|BCCP_PSEAE	7	7	7	>sp|P37799|BCCP_PSEAE Biotin carboxyl carrier protein of acetyl-CoA carboxylase OS=Pseudomonas aeruginosa (strain ATCC 15692 / PAO1 / 1C / PRS 101 / LMG 12228) GN=accB PE=3 SV=1	1	7	7	7	57.7	57.7	57.7	16.455	156	156	0	70.894	422060000	62				40	17;723;724;799;800;1158;1190	True;True;True;True;True;True;True	17;729;730;805;806;1169;1170;1202	24;25;1292;1293;1294;1295;1296;1427;1428;1429;1430;1431;1432;2060;2061;2062;2063;2125;2126;2127;2128	38;39;40;41;42;43;2439;2440;2441;2442;2443;2444;2445;2693;2694;2695;2696;2697;2698;2699;2700;2701;2702;2703;2704;2705;2706;2707;3808;3809;3810;3811;3812;3813;3814;3815;3816;3817;3818;3819;3820;3821;3822;3823;3943;3944;3945;3946;3947;3948;3949;3950;3951;3952;3953;3954;3955;3956;3957;3958;3959;3960	42;2440;2442;2693;2703;3811;3944	6	87
sp|P38100|CARB_PSEAE	sp|P38100|CARB_PSEAE	9	9	9	>sp|P38100|CARB_PSEAE Carbamoyl-phosphate synthase large chain OS=Pseudomonas aeruginosa (strain ATCC 15692 / PAO1 / 1C / PRS 101 / LMG 12228) GN=carB PE=3 SV=3	1	9	9	9	19.8	19.8	19.8	117.33	1073	1073	0	63.964	30201000	21				41	87;104;308;313;518;755;843;907;1224	True;True;True;True;True;True;True;True;True	88;105;310;315;522;761;849;914;1236	164;190;549;550;551;558;931;1346;1507;1508;1612;1613;2189;2190	372;406;1133;1134;1135;1136;1137;1138;1139;1140;1148;1780;2531;2831;2832;3033;3034;4110;4111;4112;4113	372;406;1134;1148;1780;2531;2832;3033;4112
sp|P43336|PHHC_PSEAE	sp|P43336|PHHC_PSEAE	4	4	4	>sp|P43336|PHHC_PSEAE Aromatic-amino-acid aminotransferase OS=Pseudomonas aeruginosa (strain ATCC 15692 / PAO1 / 1C / PRS 101 / LMG 12228) GN=phhC PE=3 SV=2	1	4	4	4	15.3	15.3	15.3	43.273	399	399	0	32.929	36319000	9				42	21;528;622;735	True;True;True;True	21;532;626;741	32;33;945;946;1101;1102;1312;1313	57;58;1801;1802;1803;2076;2077;2481;2482	57;1801;2077;2481
sp|P47203|FTSA_PSEAE	sp|P47203|FTSA_PSEAE	3	3	3	>sp|P47203|FTSA_PSEAE Cell division protein FtsA OS=Pseudomonas aeruginosa (strain ATCC 15692 / PAO1 / 1C / PRS 101 / LMG 12228) GN=ftsA PE=3 SV=2	1	3	3	3	9.8	9.8	9.8	44.646	417	417	0	20.25	5260700	5				43	925;1244;1458	True;True;True	933;1256;1471	1649;2224;2598	3116;3117;4177;4793;4794	3116;4177;4793
sp|P47204|FTSZ_PSEAE	sp|P47204|FTSZ_PSEAE	4	4	4	>sp|P47204|FTSZ_PSEAE Cell division protein FtsZ OS=Pseudomonas aeruginosa (strain ATCC 15692 / PAO1 / 1C / PRS 101 / LMG 12228) GN=ftsZ PE=1 SV=2	1	4	4	4	15.2	15.2	15.2	41.218	394	394	0	36.219	13335000	6				44	520;844;1267;1411	True;True;True;True	524;850;1280;1424	933;1509;2266;2267;2519;2520	1782;2833;4245;4246;4677;4678	1782;2833;4246;4677
sp|P48247|GSA_PSEAE	sp|P48247|GSA_PSEAE	8	8	8	>sp|P48247|GSA_PSEAE Glutamate-1-semialdehyde 2,1-aminomutase OS=Pseudomonas aeruginosa (strain ATCC 15692 / PAO1 / 1C / PRS 101 / LMG 12228) GN=hemL PE=1 SV=2	1	8	8	8	35.6	35.6	35.6	45.397	427	427	0	60.843	51162000	11				45	74;336;574;630;942;974;1287;1495	True;True;True;True;True;True;True;True	74;338;578;634;950;983;1300;1508	130;131;600;1021;1113;1681;1740;1741;2297;2298;2654	253;254;255;1228;1951;2089;3159;3252;3253;3254;4294;4295;4895	253;1228;1951;2089;3159;3253;4295;4895
sp|P48372|GYRA_PSEAE	sp|P48372|GYRA_PSEAE	1	1	1	>sp|P48372|GYRA_PSEAE DNA gyrase subunit A OS=Pseudomonas aeruginosa (strain ATCC 15692 / PAO1 / 1C / PRS 101 / LMG 12228) GN=gyrA PE=3 SV=1	1	1	1	1	1.4	1.4	1.4	101.13	923	923	0	5.7726	1535300	0				46	488	TRUE	492	873	1685	1685
sp|P50987|ARLY_PSEAE	sp|P50987|ARLY_PSEAE	1	1	1	>sp|P50987|ARLY_PSEAE Argininosuccinate lyase OS=Pseudomonas aeruginosa (strain ATCC 15692 / PAO1 / 1C / PRS 101 / LMG 12228) GN=argH PE=3 SV=2	1	1	1	1	2.8	2.8	2.8	51.64	464	464	0	12.417	5217500	3				47	1309	TRUE	1322	2337;2338	4379;4380;4381	4381
sp|P53593|SUCC_PSEAE	sp|P53593|SUCC_PSEAE	18	18	18	>sp|P53593|SUCC_PSEAE Succinyl-CoA ligase [ADP-forming] subunit beta OS=Pseudomonas aeruginosa (strain ATCC 15692 / PAO1 / 1C / PRS 101 / LMG 12228) GN=sucC PE=3 SV=2	1	18	18	18	49	49	49	41.542	388	388	0	205.87	594920000	92				48	49;189;363;385;618;631;653;667;668;703;768;771;772;956;1019;1067;1352;1353	True;True;True;True;True;True;True;True;True;True;True;True;True;True;True;True;True;True	49;190;365;387;622;635;657;672;673;709;774;777;778;964;1029;1078;1365;1366	85;86;335;336;647;687;1093;1094;1095;1114;1115;1156;1157;1179;1180;1181;1182;1183;1184;1247;1364;1365;1370;1371;1372;1373;1705;1706;1828;1829;1901;1902;1903;2415;2416;2417;2418;2419;2420	145;146;147;148;149;150;151;647;648;649;650;651;652;653;654;655;656;1316;1373;2065;2066;2067;2068;2090;2091;2092;2151;2152;2153;2197;2198;2199;2200;2201;2202;2203;2204;2205;2350;2550;2551;2552;2560;2561;2562;2563;2564;2565;2566;2567;3202;3203;3423;3424;3425;3426;3427;3428;3429;3430;3431;3432;3433;3567;3568;3569;3570;3571;3572;3573;4512;4513;4514;4515;4516;4517;4518;4519;4520;4521;4522;4523;4524;4…	146;652;1316;1373;2066;2092;2152;2197;2202;2350;2550;2560;2565;3202;3424;3568;4514;4532
sp|P53641|SODF_PSEAE	sp|P53641|SODF_PSEAE	4	4	4	>sp|P53641|SODF_PSEAE Superoxide dismutase [Fe] OS=Pseudomonas aeruginosa (strain ATCC 15692 / PAO1 / 1C / PRS 101 / LMG 12228) GN=sodB PE=3 SV=3	1	4	4	4	25.4	25.4	25.4	21.351	193	193	0	33.558	59747000	17				49	52;1135;1256;1496	True;True;True;True	52;1146;1269;1509	91;92;2017;2018;2246;2247;2655;2656	158;159;160;161;162;3740;3741;4206;4207;4208;4209;4210;4896;4897;4898;4899;4900	159;3741;4209;4898
sp|P57112|STHA_PSEAE	sp|P57112|STHA_PSEAE	5	5	5	>sp|P57112|STHA_PSEAE Soluble pyridine nucleotide transhydrogenase OS=Pseudomonas aeruginosa (strain ATCC 15692 / PAO1 / 1C / PRS 101 / LMG 12228) GN=sthA PE=1 SV=2	1	5	5	5	12.3	12.3	12.3	51.16	464	464	0	32.003	26847000	7				50	165;1060;1091;1277;1440	True;True;True;True;True	166;1071;1102;1290;1453	297;298;1892;1936;1937;2283;2563	589;590;3551;3628;3629;4271;4743	590;3551;3629;4271;4743
sp|P72173|AAT_PSEAE	sp|P72173|AAT_PSEAE	8	8	8	>sp|P72173|AAT_PSEAE Aspartate aminotransferase OS=Pseudomonas aeruginosa (strain ATCC 15692 / PAO1 / 1C / PRS 101 / LMG 12228) GN=aspC PE=3 SV=2	1	8	8	8	26.4	26.4	26.4	43.319	398	398	0	59.95	79464000	18				51	64;107;567;816;1136;1314;1426;1498	True;True;True;True;True;True;True;True	64;108;571;822;1147;1327;1439;1511	113;114;195;196;1007;1008;1458;2019;2346;2347;2538;2539;2658;2659	209;210;211;212;413;414;415;416;1905;1906;2751;3742;3743;4393;4394;4706;4707;4902;4903	210;413;1906;2751;3742;4394;4706;4903
sp|P77915|HEMN_PSEAE	sp|P77915|HEMN_PSEAE	5	5	5	>sp|P77915|HEMN_PSEAE Oxygen-independent coproporphyrinogen-III oxidase OS=Pseudomonas aeruginosa (strain ATCC 15692 / PAO1 / 1C / PRS 101 / LMG 12228) GN=hemN PE=2 SV=2	1	5	5	5	15	15	15	52.488	460	460	0	33.899	20529000	8				52	389;1132;1259;1401;1494	True;True;True;True;True	391;1143;1272;1414;1507	696;2011;2012;2252;2253;2502;2653	1397;3733;3734;4217;4218;4654;4893;4894	1397;3734;4218;4654;4894
sp|Q51342|PUR1_PSEAE	sp|Q51342|PUR1_PSEAE	3	3	3	>sp|Q51342|PUR1_PSEAE Amidophosphoribosyltransferase OS=Pseudomonas aeruginosa (strain ATCC 15692 / PAO1 / 1C / PRS 101 / LMG 12228) GN=purF PE=3 SV=3	1	3	3	3	9.6	9.6	9.6	55.369	501	501	0	23.575	17552000	10				53	582;1156;1189	True;True;True	586;1167;1201	1036;2056;2057;2123;2124	1969;1970;3799;3800;3801;3802;3803;3940;3941;3942	1970;3802;3940
sp|Q51390|GLPK2_PSEAE	sp|Q51390|GLPK2_PSEAE	1	1	1	>sp|Q51390|GLPK2_PSEAE Glycerol kinase 2 OS=Pseudomonas aeruginosa (strain ATCC 15692 / PAO1 / 1C / PRS 101 / LMG 12228) GN=glpK2 PE=3 SV=2	1	1	1	1	2.2	2.2	2.2	55.966	505	505	0	6.5292	3544900	1				54	192	TRUE	193	340	660	660
sp|Q51422|SYDND_PSEAE	sp|Q51422|SYDND_PSEAE	9	9	9	>sp|Q51422|SYDND_PSEAE Aspartate--tRNA(Asp/Asn) ligase OS=Pseudomonas aeruginosa (strain ATCC 15692 / PAO1 / 1C / PRS 101 / LMG 12228) GN=aspS PE=1 SV=2	1	9	9	9	22.7	22.7	22.7	66.207	591	591	0	76.14	49901000	19				55	215;412;420;1069;1252;1279;1315;1360;1481	True;True;True;True;True;True;True;True;True	216;415;423;1080;1264;1265;1292;1328;1373;1494	380;381;734;735;746;747;1906;2236;2237;2238;2239;2286;2348;2431;2633	729;730;731;732;1456;1457;1473;1474;3577;4195;4196;4197;4198;4199;4278;4395;4549;4853;4854	731;1456;1474;3577;4198;4278;4395;4549;4854	7	565
sp|Q51561|RPOB_PSEAE	sp|Q51561|RPOB_PSEAE	38	38	38	>sp|Q51561|RPOB_PSEAE DNA-directed RNA polymerase subunit beta OS=Pseudomonas aeruginosa (strain ATCC 15692 / PAO1 / 1C / PRS 101 / LMG 12228) GN=rpoB PE=3 SV=2	1	38	38	38	40	40	40	150.84	1357	1357	0	319.69	419540000	113				56	80;109;110;117;158;239;275;276;281;292;293;319;321;410;462;472;491;492;536;563;590;701;733;849;859;864;914;923;957;1016;1075;1171;1180;1216;1281;1397;1419;1459	True;True;True;True;True;True;True;True;True;True;True;True;True;True;True;True;True;True;True;True;True;True;True;True;True;True;True;True;True;True;True;True;True;True;True;True;True;True	80;110;111;118;159;240;277;278;283;294;295;321;323;413;466;476;495;496;540;567;594;707;739;855;865;870;922;931;965;1026;1086;1183;1192;1228;1294;1410;1432;1472	142;143;198;199;200;201;215;285;286;424;425;495;496;497;504;522;523;524;525;571;572;574;731;828;829;844;877;878;879;959;960;1001;1050;1051;1244;1245;1309;1310;1517;1533;1534;1541;1542;1627;1628;1645;1646;1707;1708;1820;1821;1914;1915;2082;2083;2108;2109;2178;2179;2288;2289;2496;2497;2530;2599	271;272;273;274;275;276;418;419;420;421;422;423;424;425;426;427;452;570;571;572;832;833;1022;1023;1024;1025;1026;1027;1028;1037;1067;1068;1069;1070;1071;1172;1173;1175;1176;1177;1453;1618;1619;1638;1639;1690;1691;1692;1823;1824;1896;1990;1991;1992;2345;2346;2347;2348;2476;2477;2478;2479;2841;2861;2862;2863;2864;2875;2876;2877;2878;3077;3078;3079;3080;3081;3082;3111;3112;3113;3204;3205;3206;3408;3…	271;421;426;452;571;832;1023;1027;1037;1068;1070;1173;1175;1453;1619;1638;1690;1692;1823;1896;1992;2347;2477;2841;2862;2876;3082;3111;3204;3408;3599;3850;3909;4096;4281;4647;4697;4795
sp|Q51567|SUCD_PSEAE	sp|Q51567|SUCD_PSEAE	8	8	8	>sp|Q51567|SUCD_PSEAE Succinyl-CoA ligase [ADP-forming] subunit alpha OS=Pseudomonas aeruginosa (strain ATCC 15692 / PAO1 / 1C / PRS 101 / LMG 12228) GN=sucD PE=3 SV=2	1	8	8	8	41.4	41.4	41.4	30.266	295	295	0	65.927	91265000	30				57	101;155;390;490;773;932;1124;1133	True;True;True;True;True;True;True;True	102;156;392;494;779;940;1135;1144	185;186;281;697;698;876;1374;1375;1662;1663;1664;1997;1998;2013;2014;2015	399;400;401;562;563;1398;1399;1688;1689;2568;2569;2570;2571;2572;2573;2574;2575;2576;2577;2578;3136;3137;3138;3713;3714;3715;3735;3736;3737;3738	399;563;1399;1689;2575;3136;3713;3737
sp|Q59636|NDK_PSEAE	sp|Q59636|NDK_PSEAE	1	1	1	>sp|Q59636|NDK_PSEAE Nucleoside diphosphate kinase OS=Pseudomonas aeruginosa (strain ATCC 15692 / PAO1 / 1C / PRS 101 / LMG 12228) GN=ndk PE=3 SV=2	1	1	1	1	6.3	6.3	6.3	15.592	143	143	0	6.0771	2551200	1				58	1038	TRUE	1049	1859	3491	3491
sp|Q59637|ODP1_PSEAE	sp|Q59637|ODP1_PSEAE	28	28	28	>sp|Q59637|ODP1_PSEAE Pyruvate dehydrogenase E1 component OS=Pseudomonas aeruginosa (strain ATCC 15692 / PAO1 / 1C / PRS 101 / LMG 12228) GN=aceE PE=3 SV=2	1	28	28	28	35.4	35.4	35.4	99.563	882	882	0	188.39	373930000	78				59	139;254;262;278;294;331;337;451;452;531;634;682;706;824;904;920;959;963;993;1035;1077;1081;1125;1150;1207;1361;1429;1448	True;True;True;True;True;True;True;True;True;True;True;True;True;True;True;True;True;True;True;True;True;True;True;True;True;True;True;True	140;255;264;280;296;333;339;455;456;535;638;687;712;830;911;928;967;971;1003;1046;1088;1092;1136;1161;1219;1374;1442;1461	255;256;449;450;469;470;499;500;501;526;591;592;601;602;808;809;810;811;951;1120;1121;1210;1211;1252;1253;1471;1472;1607;1608;1639;1640;1710;1711;1718;1786;1787;1855;1918;1922;1999;2000;2048;2049;2160;2161;2432;2433;2543;2544;2545;2577;2578	516;517;518;881;882;977;978;1030;1031;1032;1033;1034;1072;1218;1219;1229;1230;1231;1586;1587;1588;1589;1590;1591;1592;1593;1810;2098;2099;2100;2101;2274;2275;2276;2277;2278;2279;2358;2359;2360;2361;2768;2769;2770;3028;3029;3095;3096;3208;3209;3210;3211;3223;3361;3362;3363;3482;3606;3610;3716;3717;3718;3719;3720;3786;3787;3788;3789;3790;3791;4032;4033;4550;4551;4713;4714;4715;4761;4762;4763;4764;4…	517;882;978;1032;1072;1219;1229;1586;1592;1810;2101;2276;2359;2770;3029;3095;3211;3223;3363;3482;3606;3610;3717;3788;4032;4551;4713;4764
sp|Q59638|ODP2_PSEAE	sp|Q59638|ODP2_PSEAE	14	14	14	>sp|Q59638|ODP2_PSEAE Dihydrolipoyllysine-residue acetyltransferase component of pyruvate dehydrogenase complex OS=Pseudomonas aeruginosa (strain ATCC 15692 / PAO1 / 1C / PRS 101 / LMG 12228) GN=aceF PE=2 SV=2	1	14	14	14	29.8	29.8	29.8	56.708	547	547	0	95.787	111430000	34				60	30;31;194;323;357;411;782;832;833;882;1143;1144;1186;1316	True;True;True;True;True;True;True;True;True;True;True;True;True;True	30;31;195;325;359;414;788;838;839;888;1154;1155;1198;1329	51;52;53;54;345;577;635;636;732;733;1392;1393;1486;1487;1488;1489;1570;2032;2033;2034;2035;2036;2120;2349;2350	90;91;92;93;94;665;666;667;1180;1297;1298;1299;1454;1455;2619;2620;2621;2806;2807;2808;2809;2924;3760;3761;3762;3763;3764;3765;3766;3767;3768;3769;3770;3935;3936;4396;4397	91;94;665;1180;1299;1454;2619;2806;2809;2924;3760;3764;3935;4396
sp|Q59653|PYRB_PSEAE	sp|Q59653|PYRB_PSEAE	1	1	1	>sp|Q59653|PYRB_PSEAE Aspartate carbamoyltransferase OS=Pseudomonas aeruginosa (strain ATCC 15692 / PAO1 / 1C / PRS 101 / LMG 12228) GN=pyrB PE=3 SV=2	1	1	1	1	5.7	5.7	5.7	36.629	334	334	0	17.26	1784800	4				61	355	TRUE	357	632;633	1292;1293;1294;1295	1292
sp|Q9HT16|ATPF_PSEAE	sp|Q9HT16|ATPF_PSEAE	2	2	2	>sp|Q9HT16|ATPF_PSEAE ATP synthase subunit b OS=Pseudomonas aeruginosa (strain ATCC 15692 / PAO1 / 1C / PRS 101 / LMG 12228) GN=atpF PE=3 SV=1	1	2	2	2	15.4	15.4	15.4	16.956	156	156	0	14.845	4636500	3				62	161;170	True;True	162;171	290;291;306	576;577;608	576;608
sp|Q9HT18|ATPA_PSEAE	sp|Q9HT18|ATPA_PSEAE	15	15	15	>sp|Q9HT18|ATPA_PSEAE ATP synthase subunit alpha OS=Pseudomonas aeruginosa (strain ATCC 15692 / PAO1 / 1C / PRS 101 / LMG 12228) GN=atpA PE=3 SV=1	1	15	15	15	37.4	37.4	37.4	55.393	514	514	0	125.63	330550000	64				63	307;342;479;600;647;965;994;1062;1178;1179;1193;1292;1333;1400;1409	True;True;True;True;True;True;True;True;True;True;True;True;True;True;True	309;344;483;604;651;973;1004;1073;1190;1191;1205;1305;1346;1413;1422	546;547;548;609;858;859;1067;1068;1144;1145;1721;1722;1788;1789;1894;2103;2104;2105;2106;2107;2132;2133;2307;2377;2378;2379;2380;2501;2514;2515;2516;2517	1127;1128;1129;1130;1131;1132;1248;1249;1661;1662;1663;1664;1665;2028;2029;2132;2133;2134;2135;2136;3226;3227;3228;3364;3365;3366;3554;3895;3896;3897;3898;3899;3900;3901;3902;3903;3904;3966;3967;3968;3969;3970;4315;4445;4446;4447;4448;4449;4450;4451;4452;4453;4454;4652;4653;4667;4668;4669;4670;4671;4672;4673;4674;4675	1131;1248;1661;2028;2133;3227;3364;3554;3897;3900;3967;4315;4445;4653;4675
sp|Q9HT19|ATPG_PSEAE	sp|Q9HT19|ATPG_PSEAE	3	3	3	>sp|Q9HT19|ATPG_PSEAE ATP synthase gamma chain OS=Pseudomonas aeruginosa (strain ATCC 15692 / PAO1 / 1C / PRS 101 / LMG 12228) GN=atpG PE=3 SV=1	1	3	3	3	10.5	10.5	10.5	31.553	286	286	0	18.938	16856000	4				64	991;992;1141	True;True;True	1001;1002;1152	1784;1785;2028;2029	3359;3360;3753;3754	3359;3360;3753
sp|Q9HT20|ATPB_PSEAE	sp|Q9HT20|ATPB_PSEAE	14	14	14	>sp|Q9HT20|ATPB_PSEAE ATP synthase subunit beta OS=Pseudomonas aeruginosa (strain ATCC 15692 / PAO1 / 1C / PRS 101 / LMG 12228) GN=atpD PE=3 SV=1	1	14	14	14	47.2	47.2	47.2	49.499	458	458	0	123.23	146630000	37				65	250;252;282;431;661;961;1003;1065;1128;1268;1290;1291;1327;1493	True;True;True;True;True;True;True;True;True;True;True;True;True;True	251;253;284;434;666;969;1013;1076;1139;1281;1303;1304;1340;1506	442;443;446;447;505;763;764;1170;1171;1714;1715;1803;1898;2005;2006;2268;2303;2304;2305;2306;2365;2366;2651;2652	867;868;869;877;878;879;1038;1498;1499;1500;1501;2183;2184;3214;3215;3216;3388;3560;3561;3562;3726;3727;4247;4307;4308;4309;4310;4311;4312;4313;4314;4427;4428;4429;4889;4890;4891;4892	868;878;1038;1501;2184;3214;3388;3561;3727;4247;4308;4313;4428;4890
sp|Q9HT95|ATSE4_PSEAE	sp|Q9HT95|ATSE4_PSEAE	3	3	3	>sp|Q9HT95|ATSE4_PSEAE Acetyltransferase PA5475 OS=Pseudomonas aeruginosa (strain ATCC 15692 / PAO1 / 1C / PRS 101 / LMG 12228) GN=PA5475 PE=3 SV=1	1	3	3	3	29	29	29	21	186	186	0	22.935	2897900	6				66	271;306;1070	True;True;True	273;308;1081	486;487;545;1907	1009;1010;1126;3578;3579;3580	1009;1126;3578
sp|Q9HTD7|ASPA_PSEAE	sp|Q9HTD7|ASPA_PSEAE	7	7	7	>sp|Q9HTD7|ASPA_PSEAE Aspartate ammonia-lyase OS=Pseudomonas aeruginosa (strain ATCC 15692 / PAO1 / 1C / PRS 101 / LMG 12228) GN=aspA PE=3 SV=1	1	7	7	7	33.5	33.5	33.5	51.069	474	474	0	49.423	48570000	22				67	599;731;748;792;810;1248;1249	True;True;True;True;True;True;True	603;737;754;798;816;1260;1261	1065;1066;1305;1306;1335;1417;1451;2229;2230;2231	2025;2026;2027;2466;2467;2468;2469;2470;2471;2472;2473;2512;2674;2675;2676;2677;2678;2738;4183;4184;4185;4186	2027;2471;2512;2675;2738;4183;4184
sp|Q9HTF1|LTAE_PSEAE	sp|Q9HTF1|LTAE_PSEAE	3	3	3	>sp|Q9HTF1|LTAE_PSEAE Low specificity L-threonine aldolase OS=Pseudomonas aeruginosa (strain ATCC 15692 / PAO1 / 1C / PRS 101 / LMG 12228) GN=ltaE PE=3 SV=1	1	3	3	3	13.6	13.6	13.6	38.213	346	346	0	25.02	14610000	6				68	220;422;1425	True;True;True	221;425;1438	388;749;750;2537	745;1476;1477;1478;1479;4705	745;1476;4705
sp|Q9HTN8|RL28_PSEAE	sp|Q9HTN8|RL28_PSEAE	1	1	1	>sp|Q9HTN8|RL28_PSEAE 50S ribosomal protein L28 OS=Pseudomonas aeruginosa (strain ATCC 15692 / PAO1 / 1C / PRS 101 / LMG 12228) GN=rpmB PE=3 SV=1	1	1	1	1	12.8	12.8	12.8	9.0655	78	78	0	7.1466	12219000	2				69	502	TRUE	506	900;901	1732;1733	1733
sp|Q9HTQ0|DADA1_PSEAE	sp|Q9HTQ0|DADA1_PSEAE	7	7	7	>sp|Q9HTQ0|DADA1_PSEAE D-amino acid dehydrogenase 1 OS=Pseudomonas aeruginosa (strain ATCC 15692 / PAO1 / 1C / PRS 101 / LMG 12228) GN=dadA1 PE=1 SV=1	1	7	7	7	21.8	21.8	21.8	47.139	432	432	0	65.841	55418000	15				70	45;879;1126;1229;1246;1374;1479	True;True;True;True;True;True;True	45;885;1137;1241;1258;1387;1492	77;1564;1565;1566;2001;2002;2199;2200;2226;2452;2630	129;2916;2917;2918;2919;2920;3721;3722;4124;4125;4126;4127;4179;4575;4849;4850	129;2919;3722;4124;4179;4575;4850
sp|Q9HTQ2|ALR2_PSEAE	sp|Q9HTQ2|ALR2_PSEAE	2	2	2	>sp|Q9HTQ2|ALR2_PSEAE Alanine racemase, catabolic OS=Pseudomonas aeruginosa (strain ATCC 15692 / PAO1 / 1C / PRS 101 / LMG 12228) GN=dadX PE=1 SV=1	1	2	2	2	9.5	9.5	9.5	38.914	357	357	0	11.421	4306600	1				71	261;1402	True;True	263;1415	468;2503	976;4655	976;4655
sp|Q9HTV1|RHO_PSEAE	sp|Q9HTV1|RHO_PSEAE	4	4	4	>sp|Q9HTV1|RHO_PSEAE Transcription termination factor Rho OS=Pseudomonas aeruginosa (strain ATCC 15692 / PAO1 / 1C / PRS 101 / LMG 12228) GN=rho PE=3 SV=1	1	4	4	4	15	15	15	47.069	419	419	0	41.166	18448000	9				72	648;924;1116;1221	True;True;True;True	652;932;1127;1233	1146;1147;1647;1648;1982;1983;2185	2137;2138;2139;3114;3115;3692;3693;3694;4106	2138;3114;3692;4106
sp|Q9HTZ7|PCKA_PSEAE	sp|Q9HTZ7|PCKA_PSEAE	7	7	7	>sp|Q9HTZ7|PCKA_PSEAE Phosphoenolpyruvate carboxykinase [ATP] OS=Pseudomonas aeruginosa (strain ATCC 15692 / PAO1 / 1C / PRS 101 / LMG 12228) GN=pckA PE=3 SV=1	1	7	7	7	19.9	19.9	19.9	55.731	513	513	0	45.673	46279000	8				73	137;209;407;970;1245;1385;1431	True;True;True;True;True;True;True	138;210;410;978;1257;1398;1444	251;252;371;372;727;1730;2225;2474;2475;2549	511;512;707;708;1447;3238;4178;4608;4609;4719	511;707;1447;3238;4178;4608;4719
sp|Q9HU15|FABY_PSEAE	sp|Q9HU15|FABY_PSEAE	1	1	1	>sp|Q9HU15|FABY_PSEAE Beta-ketoacyl-[acyl-carrier-protein] synthase FabY OS=Pseudomonas aeruginosa (strain ATCC 15692 / PAO1 / 1C / PRS 101 / LMG 12228) GN=fabY PE=1 SV=1	1	1	1	1	2.4	2.4	2.4	68.763	634	634	0	6.6212	2424900	1				74	476	TRUE	480	851	1647	1647
sp|Q9HU21|RMLC_PSEAE	sp|Q9HU21|RMLC_PSEAE	1	1	1	>sp|Q9HU21|RMLC_PSEAE dTDP-4-dehydrorhamnose 3,5-epimerase OS=Pseudomonas aeruginosa (strain ATCC 15692 / PAO1 / 1C / PRS 101 / LMG 12228) GN=rmlC PE=1 SV=1	1	1	1	1	6.6	6.6	6.6	20.766	181	181	0	6.475	13617000	4				75	744	TRUE	750	1328;1329	2502;2503;2504;2505	2504
sp|Q9HU65|GLNA_PSEAE	sp|Q9HU65|GLNA_PSEAE	10	10	10	>sp|Q9HU65|GLNA_PSEAE Glutamine synthetase OS=Pseudomonas aeruginosa (strain ATCC 15692 / PAO1 / 1C / PRS 101 / LMG 12228) GN=glnA PE=1 SV=1	1	10	10	10	28.4	28.4	28.4	51.944	469	469	0	99.399	113000000	66				76	121;122;221;245;440;898;926;1033;1034;1170	True;True;True;True;True;True;True;True;True;True	122;123;222;246;443;444;905;934;1044;1045;1182	220;221;222;223;389;434;435;781;782;783;784;785;786;1597;1598;1650;1651;1852;1853;1854;2080;2081	462;463;464;465;466;467;746;843;844;845;846;847;848;849;1524;1525;1526;1527;1528;1529;1530;1531;1532;1533;1534;1535;1536;1537;1538;1539;1540;1541;1542;1543;1544;1545;1546;1547;1548;1549;1550;1551;1552;1553;1554;1555;1556;3007;3008;3009;3010;3011;3012;3013;3014;3118;3119;3120;3477;3478;3479;3480;3481;3847;3848;3849	462;467;746;843;1531;3008;3118;3477;3481;3847	8	377
sp|Q9HU83|HUTU_PSEAE	sp|Q9HU83|HUTU_PSEAE	1	1	1	>sp|Q9HU83|HUTU_PSEAE Urocanate hydratase OS=Pseudomonas aeruginosa (strain ATCC 15692 / PAO1 / 1C / PRS 101 / LMG 12228) GN=hutU PE=1 SV=1	1	1	1	1	2.1	2.1	2.1	61.193	559	559	0	7.7586	3798100	2				77	1372	TRUE	1385	2449;2450	4571;4572	4571
sp|Q9HUC8|SYR_PSEAE	sp|Q9HUC8|SYR_PSEAE	3	3	3	>sp|Q9HUC8|SYR_PSEAE Arginine--tRNA ligase OS=Pseudomonas aeruginosa (strain ATCC 15692 / PAO1 / 1C / PRS 101 / LMG 12228) GN=argS PE=3 SV=1	1	3	3	3	6.8	6.8	6.8	65.199	587	587	0	21.854	22330000	7				78	60;1227;1417	True;True;True	60;1239;1430	106;107;2195;2196;2527	199;200;201;4118;4119;4120;4693;4694	201;4119;4694
sp|Q9HUD0|RL31_PSEAE	sp|Q9HUD0|RL31_PSEAE	1	1	1	>sp|Q9HUD0|RL31_PSEAE 50S ribosomal protein L31 OS=Pseudomonas aeruginosa (strain ATCC 15692 / PAO1 / 1C / PRS 101 / LMG 12228) GN=rpmE PE=1 SV=1	1	1	1	1	11.3	11.3	11.3	7.9201	71	71	0.0068027	5.5962	9383300	2				79	416	TRUE	419	740;741	1467;1468	1468
sp|Q9HUM0|HFQ_PSEAE	sp|Q9HUM0|HFQ_PSEAE	1	1	1	>sp|Q9HUM0|HFQ_PSEAE RNA-binding protein Hfq OS=Pseudomonas aeruginosa (strain ATCC 15692 / PAO1 / 1C / PRS 101 / LMG 12228) GN=hfq PE=1 SV=1	1	1	1	1	15.9	15.9	15.9	9.1034	82	82	0	5.8004	2275900	3				80	853	TRUE	859	1524;1525	2849;2850;2851	2850
sp|Q9HUM6|PURA_PSEAE	sp|Q9HUM6|PURA_PSEAE	3	3	3	>sp|Q9HUM6|PURA_PSEAE Adenylosuccinate synthetase OS=Pseudomonas aeruginosa (strain ATCC 15692 / PAO1 / 1C / PRS 101 / LMG 12228) GN=purA PE=3 SV=1	1	3	3	3	13.7	13.7	13.7	46.814	430	430	0	29.453	18073000	9				81	1226;1301;1334	True;True;True	1238;1314;1347	2193;2194;2322;2381;2382	4116;4117;4359;4455;4456;4457;4458;4459;4460	4117;4359;4455
sp|Q9HV43|DNAK_PSEAE	sp|Q9HV43|DNAK_PSEAE	8	8	8	>sp|Q9HV43|DNAK_PSEAE Chaperone protein DnaK OS=Pseudomonas aeruginosa (strain ATCC 15692 / PAO1 / 1C / PRS 101 / LMG 12228) GN=dnaK PE=3 SV=1	1	8	8	8	19.2	19.2	19.2	68.402	637	637	0	76.481	102980000	22				82	183;404;633;918;980;1053;1138;1262	True;True;True;True;True;True;True;True	184;407;637;926;990;1064;1149;1275	326;327;723;1118;1119;1634;1635;1757;1758;1759;1760;1880;1881;2022;2258;2259	637;638;1443;2095;2096;2097;3088;3089;3288;3289;3290;3291;3292;3293;3294;3528;3529;3530;3746;4232;4233;4234;4235	637;1443;2095;3089;3288;3530;3746;4233
sp|Q9HV50|GLMM_PSEAE	sp|Q9HV50|GLMM_PSEAE	2	2	2	>sp|Q9HV50|GLMM_PSEAE Phosphoglucosamine mutase OS=Pseudomonas aeruginosa (strain ATCC 15692 / PAO1 / 1C / PRS 101 / LMG 12228) GN=glmM PE=3 SV=1	1	2	2	2	9.2	9.2	9.2	47.796	445	445	0	12.679	13959000	6				83	855;1320	True;True	861;1333	1527;1528;2356;2357	2853;2854;2855;2856;4415;4416	2853;4416
sp|Q9HV55|IF2_PSEAE	sp|Q9HV55|IF2_PSEAE	2	2	2	>sp|Q9HV55|IF2_PSEAE Translation initiation factor IF-2 OS=Pseudomonas aeruginosa (strain ATCC 15692 / PAO1 / 1C / PRS 101 / LMG 12228) GN=infB PE=3 SV=1	1	2	2	2	4	4	4	90.911	840	840	0	16.775	3757000	3				84	345;795	True;True	347;801	613;1421	1257;2682;2683	1257;2683
sp|Q9HV59|PNP_PSEAE	sp|Q9HV59|PNP_PSEAE	12	12	12	>sp|Q9HV59|PNP_PSEAE Polyribonucleotide nucleotidyltransferase OS=Pseudomonas aeruginosa (strain ATCC 15692 / PAO1 / 1C / PRS 101 / LMG 12228) GN=pnp PE=3 SV=1	1	12	12	12	20	20	20	75.452	701	701	0	98.046	110690000	24				85	38;157;225;226;280;473;549;609;665;841;1056;1082	True;True;True;True;True;True;True;True;True;True;True;True	38;158;226;227;282;477;553;613;670;847;1067;1093	65;66;283;284;395;396;397;503;845;846;979;1079;1080;1176;1177;1503;1504;1505;1886;1887;1923	111;112;565;566;567;568;569;754;755;756;1036;1640;1641;1856;2043;2044;2191;2192;2193;2194;2827;2828;2829;3541;3542;3611	111;568;754;755;1036;1640;1856;2043;2192;2828;3542;3611
sp|Q9HVA2|ILVC_PSEAE	sp|Q9HVA2|ILVC_PSEAE	5	5	5	>sp|Q9HVA2|ILVC_PSEAE Ketol-acid reductoisomerase OS=Pseudomonas aeruginosa (strain ATCC 15692 / PAO1 / 1C / PRS 101 / LMG 12228) GN=ilvC PE=1 SV=1	1	5	5	5	18.3	18.3	18.3	36.424	338	338	0	37.131	49519000	11				86	26;487;927;1103;1214	True;True;True;True;True	26;491;935;1114;1226	43;871;872;1652;1653;1960;2175;2176	73;1680;1681;1682;1683;1684;3121;3122;3660;4090;4091;4092	73;1683;3121;3660;4092
sp|Q9HVC4|RL25_PSEAE	sp|Q9HVC4|RL25_PSEAE	3	3	3	>sp|Q9HVC4|RL25_PSEAE 50S ribosomal protein L25 OS=Pseudomonas aeruginosa (strain ATCC 15692 / PAO1 / 1C / PRS 101 / LMG 12228) GN=rplY PE=3 SV=1	1	3	3	3	25.5	25.5	25.5	21.962	204	204	0	21.025	11563000	5				87	552;814;1297	True;True;True	556;820;1310	984;1456;2315;2316	1861;2746;2747;2748;4343;4344	1861;2747;4343
sp|Q9HVC5|KPRS_PSEAE	sp|Q9HVC5|KPRS_PSEAE	3	3	3	>sp|Q9HVC5|KPRS_PSEAE Ribose-phosphate pyrophosphokinase OS=Pseudomonas aeruginosa (strain ATCC 15692 / PAO1 / 1C / PRS 101 / LMG 12228) GN=prs PE=3 SV=1	1	3	3	3	12.5	12.5	12.5	34.04	313	313	0	22.942	20640000	5				88	687;955;1407	True;True;True	692;963;1420	1217;1218;1703;1704;2512	2286;2287;3199;3200;3201;4665	2287;3200;4665
sp|Q9HVF1|MQO2_PSEAE	sp|Q9HVF1|MQO2_PSEAE	7	7	7	>sp|Q9HVF1|MQO2_PSEAE Probable malate:quinone oxidoreductase 2 OS=Pseudomonas aeruginosa (strain ATCC 15692 / PAO1 / 1C / PRS 101 / LMG 12228) GN=mqo2 PE=3 SV=1	1	7	7	7	25.8	25.8	25.8	55.498	507	507	0	51.314	59139000	21				89	167;449;475;1142;1208;1302;1484	True;True;True;True;True;True;True	168;453;479;1153;1220;1315;1497	301;803;804;805;850;2030;2031;2162;2323;2324;2636;2637	600;601;602;603;1581;1582;1583;1646;3755;3756;3757;3758;3759;4034;4360;4361;4362;4363;4857;4858;4859	601;1583;1646;3757;4034;4363;4857
sp|Q9HVI7|GLYA3_PSEAE;sp|Q9I138|GLYA2_PSEAE	sp|Q9HVI7|GLYA3_PSEAE	4;1	4;1	4;1	>sp|Q9HVI7|GLYA3_PSEAE Serine hydroxymethyltransferase 3 OS=Pseudomonas aeruginosa (strain ATCC 15692 / PAO1 / 1C / PRS 101 / LMG 12228) GN=glyA2 PE=3 SV=1	2	4	4	4	9.1	9.1	9.1	45.157	417	417;418	0	24.989	18637000	9				90	624;989;1157;1275	True;True;True;True	628;999;1168;1288	1104;1105;1780;1781;2058;2059;2280	2080;2081;3355;3356;3804;3805;3806;3807;4268	2080;3355;3804;4268
sp|Q9HVM4|SYI_PSEAE	sp|Q9HVM4|SYI_PSEAE	4	4	4	>sp|Q9HVM4|SYI_PSEAE Isoleucine--tRNA ligase OS=Pseudomonas aeruginosa (strain ATCC 15692 / PAO1 / 1C / PRS 101 / LMG 12228) GN=ileS PE=3 SV=1	1	4	4	4	6.6	6.6	6.6	105.46	943	943	0	34.437	36515000	9				91	103;386;1139;1236	True;True;True;True	104;388;1150;1248	188;189;688;689;2023;2024;2025;2210	404;405;1374;1375;3747;3748;3749;3750;4146	405;1375;3747;4146
sp|Q9HVN5|CLPB_PSEAE	sp|Q9HVN5|CLPB_PSEAE	7	5	5	>sp|Q9HVN5|CLPB_PSEAE Chaperone protein ClpB OS=Pseudomonas aeruginosa (strain ATCC 15692 / PAO1 / 1C / PRS 101 / LMG 12228) GN=clpB PE=3 SV=1	1	7	5	5	10.5	7.8	7.8	95.004	854	854	0	42.34	12052000	10				92	47;485;677;679;1025;1192;1443	True;True;True;True;False;False;True	47;489;682;684;1036;1204;1456	81;82;868;1205;1207;1841;1842;2130;2131;2568;2569	138;139;140;141;1676;2268;2270;3459;3460;3963;3964;3965;4748;4749;4750	139;1676;2268;2270;3460;3964;4749
sp|Q9HVT8|GATA_PSEAE	sp|Q9HVT8|GATA_PSEAE	2	2	2	>sp|Q9HVT8|GATA_PSEAE Glutamyl-tRNA(Gln) amidotransferase subunit A OS=Pseudomonas aeruginosa (strain ATCC 15692 / PAO1 / 1C / PRS 101 / LMG 12228) GN=gatA PE=1 SV=1	1	2	2	2	6.4	6.4	6.4	51.862	484	484	0	12.149	2395900	4				93	822;1383	True;True	828;1396	1468;2470;2471	2765;4603;4604;4605	2765;4603
sp|Q9HVW7|MURA_PSEAE	sp|Q9HVW7|MURA_PSEAE	2	2	2	>sp|Q9HVW7|MURA_PSEAE UDP-N-acetylglucosamine 1-carboxyvinyltransferase OS=Pseudomonas aeruginosa (strain ATCC 15692 / PAO1 / 1C / PRS 101 / LMG 12228) GN=murA PE=1 SV=1	1	2	2	2	5.2	5.2	5.2	44.645	421	421	0	11.929	4124300	2				94	177;936	True;True	178;944	318;1670	625;3146	625;3146
sp|Q9HVX6|SYW_PSEAE	sp|Q9HVX6|SYW_PSEAE	1	1	1	>sp|Q9HVX6|SYW_PSEAE Tryptophan--tRNA ligase OS=Pseudomonas aeruginosa (strain ATCC 15692 / PAO1 / 1C / PRS 101 / LMG 12228) GN=trpS PE=3 SV=1	1	1	1	1	2.9	2.9	2.9	48.961	448	448	0	5.9513	1836300	0				95	774	TRUE	780	1376	2579	2579
sp|Q9HW02|MURC_PSEAE	sp|Q9HW02|MURC_PSEAE	2	2	2	>sp|Q9HW02|MURC_PSEAE UDP-N-acetylmuramate--L-alanine ligase OS=Pseudomonas aeruginosa (strain ATCC 15692 / PAO1 / 1C / PRS 101 / LMG 12228) GN=murC PE=3 SV=1	1	2	2	2	8.1	8.1	8.1	51.981	480	480	0	18.544	2620700	3				96	836;1264	True;True	842;1277	1494;1495;2261	2816;2817;4237	2816;4237
sp|Q9HW04|ARGJ_PSEAE	sp|Q9HW04|ARGJ_PSEAE	1	1	1	>sp|Q9HW04|ARGJ_PSEAE Arginine biosynthesis bifunctional protein ArgJ OS=Pseudomonas aeruginosa (strain ATCC 15692 / PAO1 / 1C / PRS 101 / LMG 12228) GN=argJ PE=3 SV=1	1	1	1	1	2.7	2.7	2.7	41.762	405	405	0.0034843	5.6823	2695900	1				97	1294	TRUE	1307	2310	4318	4318
sp|Q9HWC5|RL11_PSEAE	sp|Q9HWC5|RL11_PSEAE	2	2	2	>sp|Q9HWC5|RL11_PSEAE 50S ribosomal protein L11 OS=Pseudomonas aeruginosa (strain ATCC 15692 / PAO1 / 1C / PRS 101 / LMG 12228) GN=rplK PE=3 SV=1	1	2	2	2	23.8	23.8	23.8	14.907	143	143	0	21.186	19864000	4				98	1046;1247	True;True	1057;1259	1870;1871;2227;2228	3508;3509;4180;4181;4182	3509;4180
sp|Q9HWC9|RPOC_PSEAE	sp|Q9HWC9|RPOC_PSEAE	33	33	33	>sp|Q9HWC9|RPOC_PSEAE DNA-directed RNA polymerase subunit beta OS=Pseudomonas aeruginosa (strain ATCC 15692 / PAO1 / 1C / PRS 101 / LMG 12228) GN=rpoC PE=3 SV=1	1	33	33	33	33	33	33	154.38	1399	1399	0	267.84	496250000	111				99	24;114;119;182;257;315;329;334;358;397;398;466;474;525;621;632;640;727;790;798;805;812;895;916;930;933;948;1027;1117;1182;1283;1371;1478	True;True;True;True;True;True;True;True;True;True;True;True;True;True;True;True;True;True;True;True;True;True;True;True;True;True;True;True;True;True;True;True;True	24;115;120;183;258;317;331;336;360;400;401;470;478;529;625;636;644;733;796;804;811;818;902;924;938;941;956;1038;1128;1194;1296;1384;1491	40;41;208;209;210;211;217;218;325;454;455;456;561;587;588;596;597;637;638;712;713;714;715;835;836;847;848;849;940;941;1099;1100;1116;1117;1134;1300;1413;1414;1425;1426;1440;1441;1453;1454;1591;1592;1631;1632;1658;1659;1665;1690;1691;1845;1846;1984;1985;1986;2112;2113;2291;2292;2448;2628;2629	70;71;437;438;439;440;441;442;443;444;445;446;447;454;455;456;457;458;459;460;635;636;887;888;889;890;891;1151;1209;1210;1211;1212;1213;1223;1224;1300;1301;1302;1303;1304;1428;1429;1430;1431;1432;1433;1434;1627;1628;1629;1642;1643;1644;1645;1792;1793;1794;1795;2072;2073;2074;2075;2093;2094;2120;2449;2666;2667;2668;2669;2670;2671;2689;2690;2691;2692;2718;2719;2720;2740;2741;2742;2743;2744;2998;299…	71;443;458;635;890;1151;1212;1224;1301;1430;1433;1628;1645;1793;2072;2093;2120;2449;2667;2692;2718;2742;2998;3086;3132;3139;3174;3466;3696;3913;4286;4570;4847
sp|Q9HWD0|RS12_PSEAE	sp|Q9HWD0|RS12_PSEAE	1	1	1	>sp|Q9HWD0|RS12_PSEAE 30S ribosomal protein S12 OS=Pseudomonas aeruginosa (strain ATCC 15692 / PAO1 / 1C / PRS 101 / LMG 12228) GN=rpsL PE=3 SV=1	1	1	1	1	6.5	6.5	6.5	13.799	123	123	0	6.4531	6505300	2				100	191	TRUE	192	338;339	658;659	659
sp|Q9HWD2|EFG1_PSEAE;sp|Q9I244|EFG2_PSEAE	sp|Q9HWD2|EFG1_PSEAE	28;7	28;7	28;7	>sp|Q9HWD2|EFG1_PSEAE Elongation factor G 1 OS=Pseudomonas aeruginosa (strain ATCC 15692 / PAO1 / 1C / PRS 101 / LMG 12228) GN=fusA PE=1 SV=1	2	28	28	28	53.7	53.7	53.7	77.784	706	706;702	0	242.64	539990000	101				101	46;54;97;185;186;199;311;322;379;512;522;523;532;558;559;573;588;749;750;789;921;1002;1009;1164;1165;1306;1435;1454	True;True;True;True;True;True;True;True;True;True;True;True;True;True;True;True;True;True;True;True;True;True;True;True;True;True;True;True	46;54;98;186;187;200;313;324;381;516;526;527;536;562;563;577;592;755;756;795;929;1012;1019;1176;1177;1319;1448;1467	78;79;80;95;96;180;181;329;330;331;352;353;354;555;575;576;674;675;676;677;919;920;936;937;938;952;953;993;994;995;996;1020;1046;1047;1336;1337;1338;1411;1412;1641;1642;1801;1802;1810;2072;2073;2330;2331;2554;2555;2588;2589	130;131;132;133;134;135;136;137;165;166;167;168;392;393;640;641;642;682;683;684;1144;1145;1178;1179;1360;1361;1362;1363;1767;1768;1785;1786;1787;1788;1789;1790;1811;1812;1875;1876;1877;1878;1879;1880;1881;1882;1883;1884;1885;1886;1887;1949;1950;1981;1982;1983;1984;1985;1986;1987;2513;2514;2515;2516;2517;2518;2661;2662;2663;2664;2665;3097;3098;3099;3100;3101;3102;3103;3104;3105;3106;3384;3385;3386…	134;166;393;641;642;684;1144;1179;1362;1767;1789;1790;1811;1879;1886;1949;1981;2515;2518;2663;3098;3387;3398;3838;3839;4372;4728;4781
sp|Q9HWD5|RL3_PSEAE	sp|Q9HWD5|RL3_PSEAE	1	1	1	>sp|Q9HWD5|RL3_PSEAE 50S ribosomal protein L3 OS=Pseudomonas aeruginosa (strain ATCC 15692 / PAO1 / 1C / PRS 101 / LMG 12228) GN=rplC PE=3 SV=1	1	1	1	1	11.8	11.8	11.8	22.591	211	211	0	7.8112	29010000	5				102	614	TRUE	618	1086;1087	2050;2051;2052;2053;2054	2052
sp|Q9HWD8|RL2_PSEAE	sp|Q9HWD8|RL2_PSEAE	6	6	6	>sp|Q9HWD8|RL2_PSEAE 50S ribosomal protein L2 OS=Pseudomonas aeruginosa (strain ATCC 15692 / PAO1 / 1C / PRS 101 / LMG 12228) GN=rplB PE=3 SV=1	1	6	6	6	28.6	28.6	28.6	29.579	273	273	0	52.084	59341000	16				103	193;547;548;551;1008;1093	True;True;True;True;True;True	194;551;552;555;1018;1104	341;342;343;344;976;977;978;982;983;1809;1939;1940	661;662;663;664;1849;1850;1851;1852;1853;1854;1855;1859;1860;3397;3631;3632	664;1851;1855;1859;3397;3631
sp|Q9HWE0|RL22_PSEAE	sp|Q9HWE0|RL22_PSEAE	1	1	1	>sp|Q9HWE0|RL22_PSEAE 50S ribosomal protein L22 OS=Pseudomonas aeruginosa (strain ATCC 15692 / PAO1 / 1C / PRS 101 / LMG 12228) GN=rplV PE=3 SV=1	1	1	1	1	11.8	11.8	11.8	11.911	110	110	0	7.8214	4017900	1				104	1319	TRUE	1332	2355	4414	4414
sp|Q9HWE1|RS3_PSEAE	sp|Q9HWE1|RS3_PSEAE	1	1	1	>sp|Q9HWE1|RS3_PSEAE 30S ribosomal protein S3 OS=Pseudomonas aeruginosa (strain ATCC 15692 / PAO1 / 1C / PRS 101 / LMG 12228) GN=rpsC PE=3 SV=1	1	1	1	1	8.3	8.3	8.3	25.838	228	228	0	5.8276	1301400	1				105	728	TRUE	734	1301	2450	2450
sp|Q9HWE5|RL14_PSEAE	sp|Q9HWE5|RL14_PSEAE	3	3	3	>sp|Q9HWE5|RL14_PSEAE 50S ribosomal protein L14 OS=Pseudomonas aeruginosa (strain ATCC 15692 / PAO1 / 1C / PRS 101 / LMG 12228) GN=rplN PE=3 SV=1	1	3	3	3	31.1	31.1	31.1	13.412	122	122	0	33.151	30026000	6				106	402;940;1455	True;True;True	405;948;1468	720;1677;1678;2590;2591	1440;3154;3155;3156;4783;4784	1440;3156;4783
sp|Q9HWE8|RS14_PSEAE	sp|Q9HWE8|RS14_PSEAE	1	1	1	>sp|Q9HWE8|RS14_PSEAE 30S ribosomal protein S14 OS=Pseudomonas aeruginosa (strain ATCC 15692 / PAO1 / 1C / PRS 101 / LMG 12228) GN=rpsN PE=3 SV=1	1	1	1	1	12.9	12.9	12.9	11.565	101	101	0	7.7618	2620800	2				107	88	TRUE	89	165;166	373;374	374
sp|Q9HWE9|RS8_PSEAE	sp|Q9HWE9|RS8_PSEAE	2	2	2	>sp|Q9HWE9|RS8_PSEAE 30S ribosomal protein S8 OS=Pseudomonas aeruginosa (strain ATCC 15692 / PAO1 / 1C / PRS 101 / LMG 12228) GN=rpsH PE=3 SV=1	1	2	2	2	19.2	19.2	19.2	14.17	130	130	0	13.934	19145000	5				108	1149;1466	True;True	1160;1479	2046;2047;2610	3782;3783;3784;3785;4819	3785;4819
sp|Q9HWF1|RL18_PSEAE	sp|Q9HWF1|RL18_PSEAE	1	1	1	>sp|Q9HWF1|RL18_PSEAE 50S ribosomal protein L18 OS=Pseudomonas aeruginosa (strain ATCC 15692 / PAO1 / 1C / PRS 101 / LMG 12228) GN=rplR PE=3 SV=1	1	1	1	1	9.5	9.5	9.5	12.661	116	116	0	7.2823	6384100	2				109	7	TRUE	7	8;9	9;10	10
sp|Q9HWF2|RS5_PSEAE	sp|Q9HWF2|RS5_PSEAE	7	7	7	>sp|Q9HWF2|RS5_PSEAE 30S ribosomal protein S5 OS=Pseudomonas aeruginosa (strain ATCC 15692 / PAO1 / 1C / PRS 101 / LMG 12228) GN=rpsE PE=3 SV=1	1	7	7	7	54.8	54.8	54.8	17.625	166	166	0	83.178	97434000	21				110	150;206;612;613;1022;1023;1432	True;True;True;True;True;True;True	151;207;616;617;1032;1033;1445	273;274;365;366;1083;1084;1085;1834;1835;1836;1837;2550;2551	551;552;697;698;699;2047;2048;2049;3439;3440;3441;3442;3443;3444;3445;3446;4720;4721;4722;4723;4724	552;699;2047;2049;3443;3445;4720
sp|Q9HWF3|RL30_PSEAE	sp|Q9HWF3|RL30_PSEAE	1	1	1	>sp|Q9HWF3|RL30_PSEAE 50S ribosomal protein L30 OS=Pseudomonas aeruginosa (strain ATCC 15692 / PAO1 / 1C / PRS 101 / LMG 12228) GN=rpmD PE=1 SV=3	1	1	1	1	24.1	24.1	24.1	6.4775	58	58	0	6.3771	140670	2				111	666	TRUE	671	1178	2195;2196	2195
sp|Q9HWF7|RS13_PSEAE	sp|Q9HWF7|RS13_PSEAE	1	1	1	>sp|Q9HWF7|RS13_PSEAE 30S ribosomal protein S13 OS=Pseudomonas aeruginosa (strain ATCC 15692 / PAO1 / 1C / PRS 101 / LMG 12228) GN=rpsM PE=3 SV=1	1	1	1	1	11	11	11	13.265	118	118	0	6.3894	9136900	3				112	638	TRUE	642	1128;1129	2111;2112;2113	2112
sp|Q9HWF8|RS11_PSEAE	sp|Q9HWF8|RS11_PSEAE	2	2	2	>sp|Q9HWF8|RS11_PSEAE 30S ribosomal protein S11 OS=Pseudomonas aeruginosa (strain ATCC 15692 / PAO1 / 1C / PRS 101 / LMG 12228) GN=rpsK PE=3 SV=1	1	2	2	2	18.6	18.6	18.6	13.629	129	129	0	13.339	14857000	6				113	70;1011	True;True	70;1021	122;123;1812;1813	232;233;234;235;3400;3401	235;3400
sp|Q9HWG0|UVRA_PSEAE	sp|Q9HWG0|UVRA_PSEAE	2	2	2	>sp|Q9HWG0|UVRA_PSEAE UvrABC system protein A OS=Pseudomonas aeruginosa (strain ATCC 15692 / PAO1 / 1C / PRS 101 / LMG 12228) GN=uvrA PE=3 SV=1	1	2	2	2	3.1	3.1	3.1	104.49	945	945	0	15.666	3508500	3				114	793;1175	True;True	799;1187	1418;1419;2095	2679;2680;3873	2679;3873
sp|Q9HWZ6|IPYR_PSEAE	sp|Q9HWZ6|IPYR_PSEAE	1	1	1	>sp|Q9HWZ6|IPYR_PSEAE Inorganic pyrophosphatase OS=Pseudomonas aeruginosa (strain ATCC 15692 / PAO1 / 1C / PRS 101 / LMG 12228) GN=ppa PE=1 SV=1	1	1	1	1	6.3	6.3	6.3	19.396	175	175	0	6.2797	1052000	1				115	1303	TRUE	1316	2325	4364	4364
sp|Q9HX33|SYL_PSEAE	sp|Q9HX33|SYL_PSEAE	2	2	2	>sp|Q9HX33|SYL_PSEAE Leucine--tRNA ligase OS=Pseudomonas aeruginosa (strain ATCC 15692 / PAO1 / 1C / PRS 101 / LMG 12228) GN=leuS PE=3 SV=1	1	2	2	2	4.4	4.4	4.4	97.647	873	873	0	11.497	2230600	2				116	236;494	True;True	237;498	419;883	822;1697	822;1697
sp|Q9HXM6|GUAA_PSEAE	sp|Q9HXM6|GUAA_PSEAE	2	2	2	>sp|Q9HXM6|GUAA_PSEAE GMP synthase [glutamine-hydrolyzing] OS=Pseudomonas aeruginosa (strain ATCC 15692 / PAO1 / 1C / PRS 101 / LMG 12228) GN=guaA PE=3 SV=1	1	2	2	2	6.9	6.9	6.9	57.959	525	525	0	15.863	17523000	3				117	425;505	True;True	428;509	754;755;907	1484;1485;1739	1485;1739
sp|Q9HXN2|PUR4_PSEAE	sp|Q9HXN2|PUR4_PSEAE	3	3	3	>sp|Q9HXN2|PUR4_PSEAE Phosphoribosylformylglycinamidine synthase OS=Pseudomonas aeruginosa (strain ATCC 15692 / PAO1 / 1C / PRS 101 / LMG 12228) GN=purL PE=3 SV=1	1	3	3	3	3.5	3.5	3.5	140.65	1298	1298	0	21.297	6766600	4				118	154;1404;1472	True;True;True	155;1417;1485	280;2506;2507;2619	561;4658;4659;4831	561;4658;4831
sp|Q9HXZ2|ACCA_PSEAE	sp|Q9HXZ2|ACCA_PSEAE	1	1	1	>sp|Q9HXZ2|ACCA_PSEAE Acetyl-coenzyme A carboxylase carboxyl transferase subunit alpha OS=Pseudomonas aeruginosa (strain ATCC 15692 / PAO1 / 1C / PRS 101 / LMG 12228) GN=accA PE=1 SV=1	1	1	1	1	4.1	4.1	4.1	34.947	316	316	0	8.8741	9641100	3				119	949	TRUE	957	1692;1693	3176;3177;3178	3178
sp|Q9HXZ4|PYRG_PSEAE	sp|Q9HXZ4|PYRG_PSEAE	8	8	8	>sp|Q9HXZ4|PYRG_PSEAE CTP synthase OS=Pseudomonas aeruginosa (strain ATCC 15692 / PAO1 / 1C / PRS 101 / LMG 12228) GN=pyrG PE=3 SV=1	1	8	8	8	22.5	22.5	22.5	59.617	542	542	0	59.259	55542000	10				120	140;496;585;689;1203;1261;1465;1474	True;True;True;True;True;True;True;True	141;500;589;694;1215;1274;1478;1487	257;886;887;1040;1041;1220;1221;2149;2150;2256;2257;2608;2609;2622	519;1705;1706;1974;1975;2289;2290;4016;4017;4229;4230;4231;4817;4818;4835;4836	519;1706;1974;2289;4016;4229;4818;4836
sp|Q9HXZ5|ENO_PSEAE	sp|Q9HXZ5|ENO_PSEAE	3	3	3	>sp|Q9HXZ5|ENO_PSEAE Enolase OS=Pseudomonas aeruginosa (strain ATCC 15692 / PAO1 / 1C / PRS 101 / LMG 12228) GN=eno PE=3 SV=1	1	3	3	3	12.6	12.6	12.6	45.195	429	429	0	51.94	30155000	7				121	438;1118;1391	True;True;True	441;1129;1404	777;778;1987;2487;2488	1520;1521;3698;3699;4631;4632;4633	1521;3699;4631
sp|Q9HY84|ASSY_PSEAE	sp|Q9HY84|ASSY_PSEAE	2	2	2	>sp|Q9HY84|ASSY_PSEAE Argininosuccinate synthase OS=Pseudomonas aeruginosa (strain ATCC 15692 / PAO1 / 1C / PRS 101 / LMG 12228) GN=argG PE=3 SV=1	1	2	2	2	8.6	8.6	8.6	45.297	405	405	0	11.806	13296000	5				122	153;405	True;True	154;408	278;279;724	557;558;559;560;1444	559;1444
sp|Q9HYC7|SYM_PSEAE	sp|Q9HYC7|SYM_PSEAE	4	4	4	>sp|Q9HYC7|SYM_PSEAE Methionine--tRNA ligase OS=Pseudomonas aeruginosa (strain ATCC 15692 / PAO1 / 1C / PRS 101 / LMG 12228) GN=metG PE=3 SV=1	1	4	4	4	8.1	8.1	8.1	74.903	677	677	0	35.028	11131000	5				123	145;309;876;1099	True;True;True;True	146;311;882;1110	264;552;553;1560;1954	530;1141;1142;2912;3651	530;1141;2912;3651
sp|Q9HYD5|MAO1_PSEAE	sp|Q9HYD5|MAO1_PSEAE	3	3	3	>sp|Q9HYD5|MAO1_PSEAE NAD-dependent malic enzyme OS=Pseudomonas aeruginosa (strain ATCC 15692 / PAO1 / 1C / PRS 101 / LMG 12228) GN=maeA PE=3 SV=1	1	3	3	3	6.2	6.2	6.2	62.42	564	564	0	17.376	10639000	4				124	519;708;1442	True;True;True	523;714;1455	932;1256;2566;2567	1781;2366;4746;4747	1781;2366;4747
sp|Q9HYL2|NOSZ_PSEAE	sp|Q9HYL2|NOSZ_PSEAE	1	1	1	>sp|Q9HYL2|NOSZ_PSEAE Nitrous-oxide reductase OS=Pseudomonas aeruginosa (strain ATCC 15692 / PAO1 / 1C / PRS 101 / LMG 12228) GN=nosZ PE=3 SV=1	1	1	1	1	2.5	2.5	2.5	70.659	636	636	0	9.9599	1707500	1				125	1433	TRUE	1446	2552	4725	4725
sp|Q9HYQ8|HLDD_PSEAE	sp|Q9HYQ8|HLDD_PSEAE	2	2	2	>sp|Q9HYQ8|HLDD_PSEAE ADP-L-glycero-D-manno-heptose-6-epimerase OS=Pseudomonas aeruginosa (strain ATCC 15692 / PAO1 / 1C / PRS 101 / LMG 12228) GN=hldD PE=3 SV=2	1	2	2	2	6.7	6.7	6.7	37.188	330	330	0	11.758	2623100	3				126	1211;1467	True;True	1223;1480	2171;2611	4085;4820;4821	4085;4821
sp|Q9HYR2|FABH_PSEAE	sp|Q9HYR2|FABH_PSEAE	2	2	2	>sp|Q9HYR2|FABH_PSEAE 3-oxoacyl-[acyl-carrier-protein] synthase 3 OS=Pseudomonas aeruginosa (strain ATCC 15692 / PAO1 / 1C / PRS 101 / LMG 12228) GN=fabH PE=1 SV=1	1	2	2	2	8.5	8.5	8.5	34.003	330	330	0	17.514	10249000	4				127	15;643	True;True	15;647	21;1137;1138	33;2124;2125;2126	33;2125
sp|Q9HZ66|SERC_PSEAE	sp|Q9HZ66|SERC_PSEAE	2	2	2	>sp|Q9HZ66|SERC_PSEAE Phosphoserine aminotransferase OS=Pseudomonas aeruginosa (strain ATCC 15692 / PAO1 / 1C / PRS 101 / LMG 12228) GN=serC PE=1 SV=1	1	2	2	2	10.8	10.8	10.8	39.949	361	361	0	11.177	1405100	3				128	178;1090	True;True	179;1101	319;1935	626;627;3627	627;3627
sp|Q9HZ71|RS1_PSEAE	sp|Q9HZ71|RS1_PSEAE	12	12	12	>sp|Q9HZ71|RS1_PSEAE 30S ribosomal protein S1 OS=Pseudomonas aeruginosa (strain ATCC 15692 / PAO1 / 1C / PRS 101 / LMG 12228) GN=rpsA PE=3 SV=1	1	12	12	12	31.1	31.1	31.1	61.869	559	559	0	100.92	141440000	37				129	42;53;302;460;461;486;1017;1039;1066;1068;1108;1183	True;True;True;True;True;True;True;True;True;True;True;True	42;53;304;464;465;490;1027;1050;1077;1079;1119;1195	72;73;93;94;538;539;824;825;826;827;869;870;1822;1823;1824;1825;1860;1861;1899;1900;1904;1905;1969;1970;2114;2115	120;121;122;123;124;163;164;1111;1112;1113;1612;1613;1614;1615;1616;1617;1677;1678;1679;3410;3411;3412;3413;3414;3415;3492;3493;3563;3564;3565;3566;3574;3575;3576;3671;3672;3915;3916	122;164;1111;1615;1617;1679;3415;3492;3566;3575;3671;3916
sp|Q9HZ76|WBPE_PSEAE	sp|Q9HZ76|WBPE_PSEAE	4	4	4	>sp|Q9HZ76|WBPE_PSEAE UDP-2-acetamido-2-deoxy-3-oxo-D-glucuronate aminotransferase OS=Pseudomonas aeruginosa (strain ATCC 15692 / PAO1 / 1C / PRS 101 / LMG 12228) GN=wbpE PE=1 SV=1	1	4	4	4	15.9	15.9	15.9	38.924	359	359	0	37.248	44116000	11				130	637;762;1274;1468	True;True;True;True	641;768;1287;1481	1127;1354;1355;2278;2279;2612;2613	2110;2540;2541;4264;4265;4266;4267;4822;4823;4824;4825	2110;2540;4265;4822
sp|Q9HZA7|ACCD_PSEAE	sp|Q9HZA7|ACCD_PSEAE	2	2	2	>sp|Q9HZA7|ACCD_PSEAE Acetyl-coenzyme A carboxylase carboxyl transferase subunit beta OS=Pseudomonas aeruginosa (strain ATCC 15692 / PAO1 / 1C / PRS 101 / LMG 12228) GN=accD PE=1 SV=1	1	2	2	2	10.3	10.3	10.3	31.843	290	290	0	17.074	23932000	4				131	747;964	True;True	753;972	1333;1334;1719;1720	2510;2511;3224;3225	2510;3224
sp|Q9HZE0|DHE2_PSEAE	sp|Q9HZE0|DHE2_PSEAE	43	43	43	>sp|Q9HZE0|DHE2_PSEAE NAD-specific glutamate dehydrogenase OS=Pseudomonas aeruginosa (strain ATCC 15692 / PAO1 / 1C / PRS 101 / LMG 12228) GN=gdhB PE=1 SV=1	1	43	43	43	36.2	36.2	36.2	182.64	1620	1620	0	323.31	462150000	140				132	16;67;89;105;124;125;143;160;229;268;326;341;343;344;356;436;545;572;575;676;681;726;769;785;830;839;909;968;969;972;1113;1127;1146;1166;1187;1237;1328;1336;1359;1415;1434;1463;1490	True;True;True;True;True;True;True;True;True;True;True;True;True;True;True;True;True;True;True;True;True;True;True;True;True;True;True;True;True;True;True;True;True;True;True;True;True;True;True;True;True;True;True	16;67;90;106;125;126;144;161;230;270;328;343;345;346;358;439;549;576;579;681;686;732;775;791;836;845;916;976;977;981;1124;1138;1157;1178;1199;1249;1341;1349;1372;1428;1447;1476;1503	22;23;118;167;168;191;192;228;229;230;231;262;288;289;402;403;404;405;481;482;581;582;607;608;610;611;612;634;773;774;972;973;1019;1022;1204;1209;1298;1299;1366;1367;1398;1399;1400;1401;1483;1499;1500;1616;1617;1727;1728;1729;1736;1737;1976;2003;2004;2042;2074;2075;2121;2211;2212;2367;2368;2384;2385;2430;2525;2553;2604;2605;2647;2648	34;35;36;37;224;225;375;376;407;408;409;410;476;477;478;479;480;481;482;528;574;575;765;766;767;768;769;770;771;772;773;774;775;776;777;778;779;780;781;782;783;784;785;786;787;788;789;790;791;792;793;1001;1002;1003;1185;1186;1187;1188;1244;1245;1246;1247;1250;1251;1252;1253;1254;1255;1256;1296;1512;1513;1514;1515;1842;1843;1844;1948;1952;1953;2267;2273;2447;2448;2553;2554;2555;2628;2629;2630;2631…	37;225;375;407;476;480;528;574;785;1003;1187;1246;1250;1255;1296;1513;1843;1948;1952;2267;2273;2448;2554;2632;2797;2822;3040;3235;3237;3247;3679;3724;3776;3841;3937;4149;4431;4463;4548;4691;4726;4812;4883
sp|Q9HZJ2|FADB_PSEAE	sp|Q9HZJ2|FADB_PSEAE	8	8	8	>sp|Q9HZJ2|FADB_PSEAE Fatty acid oxidation complex subunit alpha OS=Pseudomonas aeruginosa (strain ATCC 15692 / PAO1 / 1C / PRS 101 / LMG 12228) GN=fadB PE=3 SV=1	1	8	8	8	17.8	17.8	17.8	76.953	715	715	0	63.487	64650000	20				133	312;483;791;1197;1213;1255;1358;1475	True;True;True;True;True;True;True;True	314;487;797;1209;1225;1268;1371;1488	556;557;865;866;1415;1416;2139;2173;2174;2244;2245;2428;2429;2623;2624	1146;1147;1671;1672;1673;2672;2673;3978;4087;4088;4089;4204;4205;4545;4546;4547;4837;4838;4839;4840;4841	1147;1671;2673;3978;4089;4205;4546;4838
sp|Q9HZJ3|FADA_PSEAE	sp|Q9HZJ3|FADA_PSEAE	6	6	6	>sp|Q9HZJ3|FADA_PSEAE 3-ketoacyl-CoA thiolase OS=Pseudomonas aeruginosa (strain ATCC 15692 / PAO1 / 1C / PRS 101 / LMG 12228) GN=fadA PE=3 SV=1	1	6	6	6	26.1	26.1	26.1	41.643	391	391	0	47.785	55798000	14				134	68;162;176;288;684;1147	True;True;True;True;True;True	68;163;177;290;689;1158	119;120;292;293;316;317;513;514;1213;2043	226;227;228;229;578;579;622;623;624;1053;1054;1055;2281;3777;3778	228;579;622;1055;2281;3777
sp|Q9HZP5|ETFD_PSEAE	sp|Q9HZP5|ETFD_PSEAE	1	1	1	>sp|Q9HZP5|ETFD_PSEAE Electron transfer flavoprotein-ubiquinone oxidoreductase OS=Pseudomonas aeruginosa (strain ATCC 15692 / PAO1 / 1C / PRS 101 / LMG 12228) GN=PA2953 PE=1 SV=1	1	1	1	1	3.1	3.1	3.1	59.928	551	551	0	7.2916	6541100	2				135	1122	TRUE	1133	1993;1994	3707;3708	3707
sp|Q9HZP6|ETFB_PSEAE	sp|Q9HZP6|ETFB_PSEAE	3	3	3	>sp|Q9HZP6|ETFB_PSEAE Electron transfer flavoprotein subunit beta OS=Pseudomonas aeruginosa (strain ATCC 15692 / PAO1 / 1C / PRS 101 / LMG 12228) GN=etfB PE=3 SV=1	1	3	3	3	22.5	22.5	22.5	26.376	249	249	0	23.466	14952000	5				136	90;333;1305	True;True;True	91;335;1318	169;170;595;2328;2329	377;378;1222;4368;4369	377;1222;4369
sp|Q9HZZ2|EFP_PSEAE	sp|Q9HZZ2|EFP_PSEAE	2	2	2	>sp|Q9HZZ2|EFP_PSEAE Elongation factor P OS=Pseudomonas aeruginosa (strain ATCC 15692 / PAO1 / 1C / PRS 101 / LMG 12228) GN=efp PE=1 SV=1	1	2	2	2	15.4	15.4	15.4	20.985	188	188	0	20.673	19385000	4				137	72;1014	True;True	72;1024	125;126;1817	237;238;239;3405	238;3405
sp|Q9I099|SYT_PSEAE	sp|Q9I099|SYT_PSEAE	4	4	4	>sp|Q9I099|SYT_PSEAE Threonine--tRNA ligase OS=Pseudomonas aeruginosa (strain ATCC 15692 / PAO1 / 1C / PRS 101 / LMG 12228) GN=thrS PE=3 SV=1	1	4	4	4	10.5	10.5	10.5	73.079	640	640	0	25.653	13366000	7				138	325;757;1043;1110	True;True;True;True	327;763;1054;1121	580;1348;1866;1867;1973	1184;2533;3503;3504;3505;3675;3676	1184;2533;3503;3675
sp|Q9I0J6|NUOG_PSEAE	sp|Q9I0J6|NUOG_PSEAE	12	12	12	>sp|Q9I0J6|NUOG_PSEAE NADH-quinone oxidoreductase subunit G OS=Pseudomonas aeruginosa (strain ATCC 15692 / PAO1 / 1C / PRS 101 / LMG 12228) GN=nuoG PE=3 SV=1	1	12	12	12	22.5	22.5	22.5	98.999	905	905	0	93.139	129840000	33				139	81;111;180;361;408;417;465;784;804;863;1089;1418	True;True;True;True;True;True;True;True;True;True;True;True	81;112;181;363;411;420;469;790;810;869;1100;1431	144;145;202;203;321;322;643;644;728;742;743;833;834;1396;1397;1438;1439;1540;1934;2528;2529	277;278;279;280;428;429;430;629;630;631;632;1310;1311;1312;1448;1449;1450;1469;1470;1623;1624;1625;1626;2626;2627;2715;2716;2717;2874;3625;3626;4695;4696	277;428;630;1312;1449;1469;1625;2627;2715;2874;3625;4696
sp|Q9I0J7|NUOF_PSEAE	sp|Q9I0J7|NUOF_PSEAE	4	4	4	>sp|Q9I0J7|NUOF_PSEAE NADH-quinone oxidoreductase subunit F OS=Pseudomonas aeruginosa (strain ATCC 15692 / PAO1 / 1C / PRS 101 / LMG 12228) GN=nuoF PE=3 SV=1	1	4	4	4	18.5	18.5	18.5	48.678	448	448	0	35.572	19254000	9				140	213;934;947;1347	True;True;True;True	214;942;955;1360	377;1666;1667;1689;2405;2406	726;3140;3141;3142;3143;3171;4494;4495;4496	726;3142;3171;4494
sp|Q9I0J9|NUOCD_PSEAE	sp|Q9I0J9|NUOCD_PSEAE	10	10	10	>sp|Q9I0J9|NUOCD_PSEAE NADH-quinone oxidoreductase subunit C/D OS=Pseudomonas aeruginosa (strain ATCC 15692 / PAO1 / 1C / PRS 101 / LMG 12228) GN=nuoC PE=3 SV=1	1	10	10	10	22.4	22.4	22.4	68.322	593	593	0	82.636	52963000	13				141	260;301;409;508;527;593;801;1085;1215;1219	True;True;True;True;True;True;True;True;True;True	262;303;412;512;531;597;807;1096;1227;1231	467;536;537;729;730;910;944;1054;1433;1434;1927;2177;2183	975;1109;1110;1451;1452;1742;1800;1995;2708;2709;3616;4093;4103	975;1109;1452;1742;1800;1995;2708;3616;4093;4103
sp|Q9I0K0|NUOB_PSEAE	sp|Q9I0K0|NUOB_PSEAE	3	3	3	>sp|Q9I0K0|NUOB_PSEAE NADH-quinone oxidoreductase subunit B OS=Pseudomonas aeruginosa (strain ATCC 15692 / PAO1 / 1C / PRS 101 / LMG 12228) GN=nuoB PE=3 SV=1	1	3	3	3	16	16	16	25.425	225	225	0	19.702	8458200	3				142	591;678;906	True;True;True	595;683;913	1052;1206;1611	1993;2269;3032	1993;2269;3032
sp|Q9I0K4|ACEA_PSEAE	sp|Q9I0K4|ACEA_PSEAE	15	15	15	>sp|Q9I0K4|ACEA_PSEAE Isocitrate lyase OS=Pseudomonas aeruginosa (strain ATCC 15692 / PAO1 / 1C / PRS 101 / LMG 12228) GN=PA2634 PE=1 SV=1	1	15	15	15	36.7	36.7	36.7	58.886	531	531	0	142.73	204030000	94				143	297;346;421;565;753;834;902;999;1071;1084;1100;1200;1201;1405;1492	True;True;True;True;True;True;True;True;True;True;True;True;True;True;True	299;348;424;569;759;840;909;1009;1082;1095;1111;1212;1213;1418;1505	529;530;531;532;614;615;748;1003;1004;1343;1344;1490;1491;1603;1604;1798;1908;1925;1926;1955;2142;2143;2144;2145;2146;2508;2509;2510;2650	1075;1076;1077;1078;1079;1080;1081;1082;1083;1084;1085;1086;1087;1088;1089;1090;1091;1092;1093;1094;1095;1096;1097;1098;1099;1100;1101;1102;1103;1258;1259;1260;1261;1262;1263;1475;1898;1899;1900;1901;1902;2528;2529;2810;2811;2812;2813;3020;3021;3022;3023;3024;3025;3380;3381;3581;3613;3614;3615;3652;3981;3982;3983;3984;3985;3986;3987;3988;3989;3990;3991;3992;3993;3994;3995;3996;3997;3998;3999;4000…	1093;1259;1475;1898;2529;2812;3020;3380;3581;3613;3652;4003;4010;4660;4888
sp|Q9I1L9|DLDH1_PSEAE	sp|Q9I1L9|DLDH1_PSEAE	3	3	3	>sp|Q9I1L9|DLDH1_PSEAE Dihydrolipoyl dehydrogenase OS=Pseudomonas aeruginosa (strain ATCC 15692 / PAO1 / 1C / PRS 101 / LMG 12228) GN=lpdV PE=1 SV=1	1	3	3	3	9.3	9.3	9.3	48.588	464	464	0	22.768	14765000	4				144	144;1094;1342	True;True;True	145;1105;1355	263;1941;1942;2395	529;3633;3634;4478	529;3633;4478
sp|Q9I1M1|ODBB_PSEAE	sp|Q9I1M1|ODBB_PSEAE	1	1	1	>sp|Q9I1M1|ODBB_PSEAE 2-oxoisovalerate dehydrogenase subunit beta OS=Pseudomonas aeruginosa (strain ATCC 15692 / PAO1 / 1C / PRS 101 / LMG 12228) GN=bkdA2 PE=3 SV=1	1	1	1	1	11.1	11.1	11.1	38.324	350	350	0	6.8451	879450	2				145	11	TRUE	11	16	25;26	25
sp|Q9I1M2|ODBA_PSEAE	sp|Q9I1M2|ODBA_PSEAE	2	2	2	>sp|Q9I1M2|ODBA_PSEAE 2-oxoisovalerate dehydrogenase subunit alpha OS=Pseudomonas aeruginosa (strain ATCC 15692 / PAO1 / 1C / PRS 101 / LMG 12228) GN=bkdA1 PE=3 SV=1	1	2	2	2	11	11	11	45.256	410	410	0	14.718	5275700	5				146	299;1013	True;True	301;1023	534;1815;1816	1105;1106;1107;3403;3404	1106;3404
sp|Q9I1S2|HCNB_PSEAE	sp|Q9I1S2|HCNB_PSEAE	7	7	7	>sp|Q9I1S2|HCNB_PSEAE Hydrogen cyanide synthase subunit HcnB OS=Pseudomonas aeruginosa (strain ATCC 15692 / PAO1 / 1C / PRS 101 / LMG 12228) GN=hcnB PE=1 SV=1	1	7	7	7	20.9	20.9	20.9	50.388	464	464	0	48.664	63090000	15				147	76;106;300;377;583;835;1250	True;True;True;True;True;True;True	76;107;302;379;587;841;1262	134;135;193;194;535;671;672;1037;1492;1493;2232;2233	258;259;411;412;1108;1354;1355;1356;1357;1358;1971;2814;2815;4187;4188	259;412;1108;1354;1971;2815;4188
sp|Q9I291|GALU_PSEAE	sp|Q9I291|GALU_PSEAE	1	1	1	>sp|Q9I291|GALU_PSEAE UTP--glucose-1-phosphate uridylyltransferase OS=Pseudomonas aeruginosa (strain ATCC 15692 / PAO1 / 1C / PRS 101 / LMG 12228) GN=galU PE=3 SV=1	1	1	1	1	11.5	11.5	11.5	31.236	279	279	0	6.7031	3202200	8				148	365	TRUE	367	650;651	1320;1321;1322;1323;1324;1325;1326;1327	1320
sp|Q9I2A8|ATOB_PSEAE	sp|Q9I2A8|ATOB_PSEAE	7	7	7	>sp|Q9I2A8|ATOB_PSEAE Acetyl-CoA acetyltransferase OS=Pseudomonas aeruginosa (strain ATCC 15692 / PAO1 / 1C / PRS 101 / LMG 12228) GN=atoB PE=3 SV=1	1	7	7	7	32.8	32.8	32.8	40.405	393	393	0	40.822	36442000	9				149	65;108;320;469;587;815;1199	True;True;True;True;True;True;True	65;109;322;473;591;821;1211	115;197;573;840;1044;1045;1457;2141	213;417;1174;1634;1978;1979;1980;2749;2750;3980	213;417;1174;1634;1979;2749;3980
sp|Q9I2U0|CLPX_PSEAE	sp|Q9I2U0|CLPX_PSEAE	3	3	3	>sp|Q9I2U0|CLPX_PSEAE ATP-dependent Clp protease ATP-binding subunit ClpX OS=Pseudomonas aeruginosa (strain ATCC 15692 / PAO1 / 1C / PRS 101 / LMG 12228) GN=clpX PE=3 SV=1	1	3	3	3	12.9	12.9	12.9	46.991	426	426	0	23.483	10309000	6				150	287;821;1220	True;True;True	289;827;1232	512;1467;2184	1052;2762;2763;2764;4104;4105	1052;2763;4104
sp|Q9I2U8|SYQ_PSEAE	sp|Q9I2U8|SYQ_PSEAE	1	1	1	>sp|Q9I2U8|SYQ_PSEAE Glutamine--tRNA ligase OS=Pseudomonas aeruginosa (strain ATCC 15692 / PAO1 / 1C / PRS 101 / LMG 12228) GN=glnS PE=1 SV=1	1	1	1	1	1.8	1.8	1.8	62.912	556	556	0.0069204	5.6531	2762300	1				151	842	TRUE	848	1506	2830	2830
sp|Q9I2V5|ACNB_PSEAE	sp|Q9I2V5|ACNB_PSEAE	18	18	18	>sp|Q9I2V5|ACNB_PSEAE Aconitate hydratase B OS=Pseudomonas aeruginosa (strain ATCC 15692 / PAO1 / 1C / PRS 101 / LMG 12228) GN=acnB PE=3 SV=1	1	18	18	18	26.9	26.9	26.9	93.627	869	869	0	167.43	259570000	63				152	37;243;244;264;265;480;481;493;729;778;851;903;919;971;1096;1184;1393;1447	True;True;True;True;True;True;True;True;True;True;True;True;True;True;True;True;True;True	37;244;245;266;267;484;485;497;735;784;857;910;927;979;980;1107;1196;1406;1460	63;64;430;431;432;433;472;473;474;475;476;477;860;861;862;863;880;881;882;1302;1383;1520;1521;1605;1606;1636;1637;1638;1731;1732;1733;1734;1735;1947;1948;2116;2117;2491;2492;2575;2576	108;109;110;838;839;840;841;842;980;981;982;983;984;985;986;987;988;989;990;991;1666;1667;1668;1669;1693;1694;1695;1696;2451;2452;2596;2597;2844;2845;2846;3026;3027;3090;3091;3092;3093;3094;3239;3240;3241;3242;3243;3244;3245;3246;3640;3641;3642;3917;3918;3919;3920;3921;3922;4637;4638;4639;4640;4759;4760	108;839;840;985;990;1667;1669;1694;2452;2596;2846;3026;3094;3243;3641;3917;4637;4759	9;10	411;423
sp|Q9I383|SELD_PSEAE	sp|Q9I383|SELD_PSEAE	2	2	2	>sp|Q9I383|SELD_PSEAE Selenide, water dikinase OS=Pseudomonas aeruginosa (strain ATCC 15692 / PAO1 / 1C / PRS 101 / LMG 12228) GN=selD PE=3 SV=1	1	2	2	2	8.4	8.4	8.4	36.353	344	344	0	14.014	2665900	2				153	562;1308	True;True	566;1321	1000;2336	1895;4378	1895;4378
sp|Q9I3D1|DLDH2_PSEAE	sp|Q9I3D1|DLDH2_PSEAE	15	15	15	>sp|Q9I3D1|DLDH2_PSEAE Dihydrolipoyl dehydrogenase OS=Pseudomonas aeruginosa (strain ATCC 15692 / PAO1 / 1C / PRS 101 / LMG 12228) GN=lpdG PE=3 SV=1	1	15	15	15	46.9	46.9	46.9	50.164	478	478	0	139.34	293350000	60				154	34;113;134;149;166;172;298;378;560;719;777;1018;1087;1162;1257	True;True;True;True;True;True;True;True;True;True;True;True;True;True;True	34;114;135;150;167;173;300;380;564;725;783;1028;1098;1174;1270	58;59;206;207;245;246;272;299;300;309;310;533;673;997;998;1284;1381;1382;1826;1827;1929;1930;1931;2068;2069;2248;2249	100;101;102;103;435;436;501;502;503;504;550;591;592;593;594;595;596;597;598;599;612;613;614;1104;1359;1888;1889;1890;1891;1892;1893;2416;2586;2587;2588;2589;2590;2591;2592;2593;2594;2595;3416;3417;3418;3419;3420;3421;3422;3619;3620;3621;3622;3831;3832;3833;4211;4212;4213;4214	103;436;503;550;598;612;1104;1359;1892;2416;2591;3417;3622;3831;4211
sp|Q9I3D2|ODO2_PSEAE	sp|Q9I3D2|ODO2_PSEAE	3	3	3	>sp|Q9I3D2|ODO2_PSEAE Dihydrolipoyllysine-residue succinyltransferase component of 2-oxoglutarate dehydrogenase complex OS=Pseudomonas aeruginosa (strain ATCC 15692 / PAO1 / 1C / PRS 101 / LMG 12228) GN=sucB PE=3 SV=1	1	3	3	3	13.4	13.4	13.4	42.887	409	409	0	20.775	18928000	6				155	787;889;983	True;True;True	793;895;993	1403;1404;1579;1765;1766	2643;2644;2937;2938;3303;3304;3305	2644;2938;3303
sp|Q9I3F5|ACNA_PSEAE	sp|Q9I3F5|ACNA_PSEAE	18	18	18	>sp|Q9I3F5|ACNA_PSEAE Aconitate hydratase A OS=Pseudomonas aeruginosa (strain ATCC 15692 / PAO1 / 1C / PRS 101 / LMG 12228) GN=acnA PE=3 SV=1	1	18	18	18	31.2	31.2	31.2	99.147	910	910	0	154.91	210420000	75				156	62;92;93;328;448;592;641;669;745;825;1239;1273;1289;1354;1363;1366;1437;1489	True;True;True;True;True;True;True;True;True;True;True;True;True;True;True;True;True;True	62;93;94;330;452;596;645;674;751;831;1251;1286;1302;1367;1376;1379;1450;1502	110;172;173;174;175;585;586;801;802;1053;1135;1185;1330;1331;1473;2214;2215;2216;2217;2276;2277;2301;2302;2421;2422;2436;2437;2441;2442;2557;2558;2645;2646	205;380;381;382;383;384;1192;1193;1194;1195;1196;1197;1198;1199;1200;1201;1202;1203;1204;1205;1206;1207;1208;1577;1578;1579;1580;1994;2121;2122;2206;2506;2507;2508;2771;2772;4151;4152;4153;4154;4155;4156;4157;4158;4159;4160;4161;4162;4163;4164;4165;4262;4263;4298;4299;4300;4301;4302;4303;4304;4305;4306;4534;4535;4536;4537;4554;4555;4560;4561;4735;4736;4880;4881;4882	205;380;384;1192;1579;1994;2122;2206;2507;2772;4160;4262;4299;4536;4554;4561;4736;4881
sp|Q9I4W0|PUR7_PSEAE	sp|Q9I4W0|PUR7_PSEAE	1	1	1	>sp|Q9I4W0|PUR7_PSEAE Phosphoribosylaminoimidazole-succinocarboxamide synthase OS=Pseudomonas aeruginosa (strain ATCC 15692 / PAO1 / 1C / PRS 101 / LMG 12228) GN=purC PE=3 SV=1	1	1	1	1	5.1	5.1	5.1	26.83	236	236	0	6.4037	10094000	2				157	763	TRUE	769	1356;1357	2542;2543	2542
sp|Q9I4Z4|PAL_PSEAE	sp|Q9I4Z4|PAL_PSEAE	6	6	6	>sp|Q9I4Z4|PAL_PSEAE Peptidoglycan-associated lipoprotein OS=Pseudomonas aeruginosa (strain ATCC 15692 / PAO1 / 1C / PRS 101 / LMG 12228) GN=pal PE=3 SV=1	1	6	6	6	47	47	47	17.925	168	168	0	48.104	94922000	20				158	95;374;388;1420;1421;1486	True;True;True;True;True;True	96;376;390;1433;1434;1499	177;666;667;694;695;2531;2532;2640;2641	386;1348;1349;1350;1393;1394;1395;1396;4698;4699;4700;4868;4869;4870;4871;4872;4873;4874;4875;4876	386;1348;1394;4698;4700;4868
sp|Q9I502|SYP_PSEAE	sp|Q9I502|SYP_PSEAE	3	3	3	>sp|Q9I502|SYP_PSEAE Proline--tRNA ligase OS=Pseudomonas aeruginosa (strain ATCC 15692 / PAO1 / 1C / PRS 101 / LMG 12228) GN=proS PE=3 SV=1	1	3	3	3	9.5	9.5	9.5	63.103	571	571	0	16.556	2708400	2				159	507;1218;1406	True;True;True	511;1230;1419	909;2182;2511	1741;4102;4664	1741;4102;4664
sp|Q9I513|PUR5_PSEAE	sp|Q9I513|PUR5_PSEAE	1	1	1	>sp|Q9I513|PUR5_PSEAE Phosphoribosylformylglycinamidine cyclo-ligase OS=Pseudomonas aeruginosa (strain ATCC 15692 / PAO1 / 1C / PRS 101 / LMG 12228) GN=purM PE=3 SV=1	1	1	1	1	3.1	3.1	3.1	37.122	353	353	0.0068729	5.6325	1952600	1				160	4	TRUE	4	5	6	6
sp|Q9I553|SYA_PSEAE	sp|Q9I553|SYA_PSEAE	2	2	2	>sp|Q9I553|SYA_PSEAE Alanine--tRNA ligase OS=Pseudomonas aeruginosa (strain ATCC 15692 / PAO1 / 1C / PRS 101 / LMG 12228) GN=alaS PE=3 SV=1	1	2	2	2	5.3	5.3	5.3	94.701	874	874	0	18.49	4085200	2				161	427;597	True;True	430;601	758;1062	1491;2020	1491;2020
sp|Q9I558|ACSA1_PSEAE;sp|Q9HV66|ACSA2_PSEAE	sp|Q9I558|ACSA1_PSEAE;sp|Q9HV66|ACSA2_PSEAE	2;1	2;1	2;1	>sp|Q9I558|ACSA1_PSEAE Acetyl-coenzyme A synthetase 1 OS=Pseudomonas aeruginosa (strain ATCC 15692 / PAO1 / 1C / PRS 101 / LMG 12228) GN=acsA1 PE=3 SV=1;>sp|Q9HV66|ACSA2_PSEAE Acetyl-coenzyme A synthetase 2 OS=Pseudomonas aeruginosa (strain ATCC 15692 / PA	2	2	2	2	4.6	4.6	4.6	71.762	651	651;645	0	18.713	12897000	4				162	233;335	True;True	234;337	412;598;599	807;1225;1226;1227	807;1226
sp|Q9I576|HPPD_PSEAE	sp|Q9I576|HPPD_PSEAE	1	1	1	>sp|Q9I576|HPPD_PSEAE 4-hydroxyphenylpyruvate dioxygenase OS=Pseudomonas aeruginosa (strain ATCC 15692 / PAO1 / 1C / PRS 101 / LMG 12228) GN=hpd PE=3 SV=1	1	1	1	1	4.2	4.2	4.2	39.912	357	357	0	21.544	1884100	2				163	990	TRUE	1000	1782;1783	3357;3358	3357
sp|Q9I587|FUMC2_PSEAE	sp|Q9I587|FUMC2_PSEAE	1	1	1	>sp|Q9I587|FUMC2_PSEAE Fumarate hydratase class II 2 OS=Pseudomonas aeruginosa (strain ATCC 15692 / PAO1 / 1C / PRS 101 / LMG 12228) GN=fumC2 PE=3 SV=1	1	1	1	1	3.4	3.4	3.4	49.121	464	464	0	6.791	3030300	1				164	3	TRUE	3	4	5	5
sp|Q9I5A4|ACKA_PSEAE	sp|Q9I5A4|ACKA_PSEAE	1	1	1	>sp|Q9I5A4|ACKA_PSEAE Acetate kinase OS=Pseudomonas aeruginosa (strain ATCC 15692 / PAO1 / 1C / PRS 101 / LMG 12228) GN=ackA PE=3 SV=1	1	1	1	1	6.6	6.6	6.6	42.421	394	394	0	6.0994	2598300	2				165	187	TRUE	188	332	643;644	643
sp|Q9I5A5|PTA_PSEAE	sp|Q9I5A5|PTA_PSEAE	3	3	3	>sp|Q9I5A5|PTA_PSEAE Phosphate acetyltransferase OS=Pseudomonas aeruginosa (strain ATCC 15692 / PAO1 / 1C / PRS 101 / LMG 12228) GN=pta PE=1 SV=1	1	3	3	3	6.2	6.2	6.2	75.696	704	704	0	18.863	4545900	4				166	372;704;1341	True;True;True	374;710;1354	663;1248;2393;2394	1342;2351;4476;4477	1342;2351;4477
sp|Q9I5Q9|ARGC_PSEAE	sp|Q9I5Q9|ARGC_PSEAE	2	2	2	>sp|Q9I5Q9|ARGC_PSEAE N-acetyl-gamma-glutamyl-phosphate reductase OS=Pseudomonas aeruginosa (strain ATCC 15692 / PAO1 / 1C / PRS 101 / LMG 12228) GN=argC PE=3 SV=1	1	2	2	2	10.2	10.2	10.2	36.684	344	344	0	15.762	5413200	1				167	1326;1452	True;True	1339;1465	2364;2585	4426;4774	4426;4774
sp|Q9I5Y1|ALF_PSEAE	sp|Q9I5Y1|ALF_PSEAE	2	2	2	>sp|Q9I5Y1|ALF_PSEAE Fructose-bisphosphate aldolase OS=Pseudomonas aeruginosa (strain ATCC 15692 / PAO1 / 1C / PRS 101 / LMG 12228) GN=fba PE=3 SV=1	1	2	2	2	7.3	7.3	7.3	38.573	354	354	0	13.241	5694600	4				168	445;1462	True;True	449;1475	795;796;2603	1570;1571;1572;4807	1571;4807
sp|Q9I5Y4|PGK_PSEAE	sp|Q9I5Y4|PGK_PSEAE	1	1	1	>sp|Q9I5Y4|PGK_PSEAE Phosphoglycerate kinase OS=Pseudomonas aeruginosa (strain ATCC 15692 / PAO1 / 1C / PRS 101 / LMG 12228) GN=pgk PE=3 SV=1	1	1	1	1	4.4	4.4	4.4	40.404	387	387	0	8.0062	10062000	2				169	1276	TRUE	1289	2281;2282	4269;4270	4270
sp|Q9I5Z0|METK_PSEAE	sp|Q9I5Z0|METK_PSEAE	5	5	5	>sp|Q9I5Z0|METK_PSEAE S-adenosylmethionine synthase OS=Pseudomonas aeruginosa (strain ATCC 15692 / PAO1 / 1C / PRS 101 / LMG 12228) GN=metK PE=3 SV=1	1	5	5	5	17.9	17.9	17.9	42.709	396	396	0	32.154	22352000	6				170	584;636;1005;1072;1416	True;True;True;True;True	588;640;1015;1083;1429	1038;1039;1125;1126;1806;1909;2526	1972;1973;2108;2109;3394;3582;4692	1972;2108;3394;3582;4692
sp|Q9I636|MASZ_PSEAE	sp|Q9I636|MASZ_PSEAE	6	6	6	>sp|Q9I636|MASZ_PSEAE Malate synthase G OS=Pseudomonas aeruginosa (strain ATCC 15692 / PAO1 / 1C / PRS 101 / LMG 12228) GN=glcB PE=3 SV=1	1	6	6	6	13	13	13	78.659	725	725	0	39.639	27270000	8				171	395;530;688;915;1300;1356	True;True;True;True;True;True	398;534;693;923;1313;1369	709;949;950;1219;1629;1630;2321;2425	1425;1807;1808;1809;2288;3083;3084;4358;4540	1425;1809;2288;3083;4358;4540
sp|Q9I685|SAHH_PSEAE	sp|Q9I685|SAHH_PSEAE	16	16	16	>sp|Q9I685|SAHH_PSEAE Adenosylhomocysteinase OS=Pseudomonas aeruginosa (strain ATCC 15692 / PAO1 / 1C / PRS 101 / LMG 12228) GN=ahcY PE=3 SV=1	1	16	16	16	47.3	47.3	47.3	51.399	469	469	0	123.31	190670000	49				172	240;353;477;628;660;722;867;896;998;1000;1047;1050;1086;1098;1282;1453	True;True;True;True;True;True;True;True;True;True;True;True;True;True;True;True	241;355;481;632;664;665;728;873;903;1008;1010;1058;1061;1097;1109;1295;1466	426;427;628;629;852;853;1109;1110;1167;1168;1169;1290;1291;1545;1593;1594;1796;1797;1799;1872;1876;1877;1928;1952;1953;2290;2586;2587	834;835;1283;1284;1285;1286;1287;1288;1648;1649;1650;1651;1652;2085;2086;2169;2170;2171;2172;2173;2174;2175;2176;2177;2178;2179;2180;2181;2182;2437;2438;2884;3000;3001;3377;3378;3379;3382;3510;3524;3525;3617;3618;3647;3648;3649;3650;4283;4775;4776;4777;4778	834;1284;1648;2085;2176;2437;2884;3000;3377;3382;3510;3525;3617;3650;4283;4775	11	387
sp|Q9I6E0|ILVD_PSEAE	sp|Q9I6E0|ILVD_PSEAE	1	1	1	>sp|Q9I6E0|ILVD_PSEAE Dihydroxy-acid dehydratase OS=Pseudomonas aeruginosa (strain ATCC 15692 / PAO1 / 1C / PRS 101 / LMG 12228) GN=ilvD PE=3 SV=1	1	1	1	1	2.1	2.1	2.1	65.159	612	612	0	8.4882	6088600	3				173	61	TRUE	61	108;109	202;203;204	204
sp|Q9I6M4|DAVT_PSEAE	sp|Q9I6M4|DAVT_PSEAE	6	6	6	>sp|Q9I6M4|DAVT_PSEAE 5-aminovalerate aminotransferase DavT OS=Pseudomonas aeruginosa (strain ATCC 15692 / PAO1 / 1C / PRS 101 / LMG 12228) GN=davT PE=1 SV=1	1	6	6	6	19	19	19	45.22	426	426	0	40.255	42822000	8				174	41;78;1181;1217;1235;1337	True;True;True;True;True;True	41;78;1193;1229;1247;1350	71;138;2110;2111;2180;2181;2209;2386;2387	119;266;3911;3912;4098;4099;4100;4101;4145;4465;4466	119;266;3912;4101;4145;4466
sp|Q9I6M5|DAVD_PSEAE	sp|Q9I6M5|DAVD_PSEAE	5	5	5	>sp|Q9I6M5|DAVD_PSEAE Glutarate-semialdehyde dehydrogenase DavD OS=Pseudomonas aeruginosa (strain ATCC 15692 / PAO1 / 1C / PRS 101 / LMG 12228) GN=davD PE=1 SV=1	1	5	5	5	20.7	20.7	20.7	51.622	483	483	0	56.037	38944000	9				175	238;467;553;840;1424	True;True;True;True;True	239;471;557;846;1437	422;423;837;985;986;1501;1502;2536	830;831;1630;1862;1863;1864;2825;2826;4704	831;1630;1864;2826;4704
sp|Q9I702|BAUC_PSEAE	sp|Q9I702|BAUC_PSEAE	1	1	1	>sp|Q9I702|BAUC_PSEAE Putative 3-oxopropanoate dehydrogenase OS=Pseudomonas aeruginosa (strain ATCC 15692 / PAO1 / 1C / PRS 101 / LMG 12228) GN=bauC PE=2 SV=1	1	1	1	1	4.2	4.2	4.2	53.322	497	497	0	5.9895	2785400	1				176	94	TRUE	95	176	385	385
sp|Q9I742|CLPV1_PSEAE	sp|Q9I742|CLPV1_PSEAE	9	9	9	>sp|Q9I742|CLPV1_PSEAE Protein ClpV1 OS=Pseudomonas aeruginosa (strain ATCC 15692 / PAO1 / 1C / PRS 101 / LMG 12228) GN=clpV1 PE=1 SV=1	1	9	9	9	13.9	13.9	13.9	98.737	902	902	0	63.851	45718000	17				177	102;263;375;457;596;698;886;899;937	True;True;True;True;True;True;True;True;True	103;265;377;461;600;704;892;906;945	187;471;668;669;818;819;1061;1240;1575;1599;1671;1672	402;403;979;1351;1352;1604;1605;1606;2019;2338;2930;2931;3015;3016;3147;3148;3149	402;979;1352;1605;2019;2338;2930;3016;3148
sp|Q9I747|HCP1_PSEAE	sp|Q9I747|HCP1_PSEAE	1	1	1	>sp|Q9I747|HCP1_PSEAE Protein hcp1 OS=Pseudomonas aeruginosa (strain ATCC 15692 / PAO1 / 1C / PRS 101 / LMG 12228) GN=hcp1 PE=1 SV=1	1	1	1	1	6.2	6.2	6.2	17.414	162	162	0.0068493	5.6275	8447200	2				178	1381	TRUE	1394	2466;2467	4599;4600	4600
sp|Q9I7B8|SYGB_PSEAE	sp|Q9I7B8|SYGB_PSEAE	2	2	2	>sp|Q9I7B8|SYGB_PSEAE Glycine--tRNA ligase beta subunit OS=Pseudomonas aeruginosa (strain ATCC 15692 / PAO1 / 1C / PRS 101 / LMG 12228) GN=glyS PE=3 SV=1	1	2	2	2	2.5	2.5	2.5	73.973	684	684	0	12.064	1558000	2				179	5;6	True;True	5;6	6;7	7;8	7;8
sp|Q9I7C2|GYRB_PSEAE	sp|Q9I7C2|GYRB_PSEAE	2	2	2	>sp|Q9I7C2|GYRB_PSEAE DNA gyrase subunit B OS=Pseudomonas aeruginosa (strain ATCC 15692 / PAO1 / 1C / PRS 101 / LMG 12228) GN=gyrB PE=3 SV=1	1	2	2	2	4.5	4.5	4.5	90.188	806	806	0	12.822	13331000	2				180	1015;1198	True;True	1025;1210	1818;1819;2140	3406;3407;3979	3407;3979
sp|Q9I7C4|DPO3B_PSEAE	sp|Q9I7C4|DPO3B_PSEAE	3	3	3	>sp|Q9I7C4|DPO3B_PSEAE DNA polymerase III subunit beta OS=Pseudomonas aeruginosa (strain ATCC 15692 / PAO1 / 1C / PRS 101 / LMG 12228) GN=dnaN PE=3 SV=1	1	3	3	3	10.4	10.4	10.4	40.694	367	367	0	19.04	5883300	3				181	198;1253;1500	True;True;True	199;1266;1513	351;2240;2661	681;4200;4907	681;4200;4907
sp|Q9I7C5|DNAA_PSEAE	sp|Q9I7C5|DNAA_PSEAE	1	1	1	>sp|Q9I7C5|DNAA_PSEAE Chromosomal replication initiator protein DnaA OS=Pseudomonas aeruginosa (strain ATCC 15692 / PAO1 / 1C / PRS 101 / LMG 12228) GN=dnaA PE=3 SV=1	1	1	1	1	2.1	2.1	2.1	57.754	514	514	0.0067114	5.5647	2373300	1				182	1	TRUE	1	2	3	3
sp|Q9LCT3|SECA_PSEAE	sp|Q9LCT3|SECA_PSEAE	4	4	4	>sp|Q9LCT3|SECA_PSEAE Protein translocase subunit SecA OS=Pseudomonas aeruginosa (strain ATCC 15692 / PAO1 / 1C / PRS 101 / LMG 12228) GN=secA PE=3 SV=1	1	4	4	4	7.6	7.6	7.6	103.85	916	916	0	22.856	8012500	4				183	210;376;471;1234	True;True;True;True	211;378;475;1246	373;670;843;2208	709;1353;1637;4144	709;1353;1637;4144
sp|Q9LCT6|DDLB_PSEAE	sp|Q9LCT6|DDLB_PSEAE	1	1	1	>sp|Q9LCT6|DDLB_PSEAE D-alanine--D-alanine ligase B OS=Pseudomonas aeruginosa (strain ATCC 15692 / PAO1 / 1C / PRS 101 / LMG 12228) GN=ddlB PE=3 SV=1	1	1	1	1	3.8	3.8	3.8	34.363	319	319	0	7.8231	1503300	1				184	1324	TRUE	1337	2361	4420	4420
sp|Q9S508|PHZB2_PSEAE;sp|O69753|PHZB1_PSEAE	sp|Q9S508|PHZB2_PSEAE;sp|O69753|PHZB1_PSEAE	4;3	4;3	4;3	>sp|Q9S508|PHZB2_PSEAE Phenazine biosynthesis protein PhzB 2 OS=Pseudomonas aeruginosa (strain ATCC 15692 / PAO1 / 1C / PRS 101 / LMG 12228) GN=phzB2 PE=1 SV=1;>sp|O69753|PHZB1_PSEAE Phenazine biosynthesis protein PhzB 1 OS=Pseudomonas aeruginosa (strain A	2	4	4	4	24.1	24.1	24.1	19.027	162	162;162	0	27.143	30905000	6				185	130;324;943;1029	True;True;True;True	131;326;951;1040	240;578;579;1682;1683;1848	496;1181;1182;1183;3160;3161;3472	496;1183;3161;3472
sp|Q9S646|PPK_PSEAE	sp|Q9S646|PPK_PSEAE	2	2	2	>sp|Q9S646|PPK_PSEAE Polyphosphate kinase OS=Pseudomonas aeruginosa (strain ATCC 15692 / PAO1 / 1C / PRS 101 / LMG 12228) GN=ppk PE=3 SV=1	1	2	2	2	3.3	3.3	3.3	78.292	690	690	0	11.939	4114900	2				186	654;683	True;True	658;688	1158;1212	2154;2280	2154;2280
sp|Q9ZFK4|KDSA_PSEAE	sp|Q9ZFK4|KDSA_PSEAE	2	2	2	>sp|Q9ZFK4|KDSA_PSEAE 2-dehydro-3-deoxyphosphooctonate aldolase OS=Pseudomonas aeruginosa (strain ATCC 15692 / PAO1 / 1C / PRS 101 / LMG 12228) GN=kdsA PE=1 SV=1	1	2	2	2	15.7	15.7	15.7	31.143	281	281	0	17.707	4018400	3				187	541;1317	True;True	545;1330	967;2351;2352	1835;1836;4398;4399	1835;4399
tr|G3XCT6|G3XCT6_PSEAE	tr|G3XCT6|G3XCT6_PSEAE	1	1	1	>tr|G3XCT6|G3XCT6_PSEAE Probable two-component sensor OS=Pseudomonas aeruginosa (strain ATCC 15692 / PAO1 / 1C / PRS 101 / LMG 12228) GN=PA1458 PE=4 SV=1	1	1	1	1	1.7	1.7	1.7	79.737	753	753	0	5.9731	2375000	0				188	1238	TRUE	1250	2213	4150	4150
tr|G3XCV0|G3XCV0_PSEAE	tr|G3XCV0|G3XCV0_PSEAE	2	2	2	>tr|G3XCV0|G3XCV0_PSEAE Transcriptional regulator FleQ OS=Pseudomonas aeruginosa (strain ATCC 15692 / PAO1 / 1C / PRS 101 / LMG 12228) GN=fleQ PE=1 SV=1	1	2	2	2	6.3	6.3	6.3	55.276	490	490	0	13.481	4213100	2				189	743;1299	True;True	749;1312	1327;2319;2320	2501;4356;4357	2501;4356
tr|G3XCZ6|G3XCZ6_PSEAE	tr|G3XCZ6|G3XCZ6_PSEAE	2	2	2	>tr|G3XCZ6|G3XCZ6_PSEAE Malonyl CoA-acyl carrier protein transacylase OS=Pseudomonas aeruginosa (strain ATCC 15692 / PAO1 / 1C / PRS 101 / LMG 12228) GN=fabD PE=3 SV=1	1	2	2	2	9.9	9.9	9.9	32.444	312	312	0	11.731	5804700	3				190	256;685	True;True	257;690	453;1214	886;2282;2283	886;2283
tr|G3XD74|G3XD74_PSEAE	tr|G3XD74|G3XD74_PSEAE	1	1	1	>tr|G3XD74|G3XD74_PSEAE D-ala-D-ala-carboxypeptidase OS=Pseudomonas aeruginosa (strain ATCC 15692 / PAO1 / 1C / PRS 101 / LMG 12228) GN=dacC PE=3 SV=1	1	1	1	1	3.9	3.9	3.9	42.457	386	386	0	5.7481	3129800	1				191	616	TRUE	620	1090	2061	2061
tr|G3XDA2|G3XDA2_PSEAE	tr|G3XDA2|G3XDA2_PSEAE	1	1	1	>tr|G3XDA2|G3XDA2_PSEAE 3-oxoacyl-[acyl-carrier-protein] synthase 2 OS=Pseudomonas aeruginosa (strain ATCC 15692 / PAO1 / 1C / PRS 101 / LMG 12228) GN=fabF1 PE=1 SV=1	1	1	1	1	5.6	5.6	5.6	43.497	414	414	0	7.0079	870170	2				192	1151	TRUE	1162	2050	3792;3793	3792
tr|Q9HT66|Q9HT66_PSEAE	tr|Q9HT66|Q9HT66_PSEAE	1	1	1	>tr|Q9HT66|Q9HT66_PSEAE Uncharacterized protein OS=Pseudomonas aeruginosa (strain ATCC 15692 / PAO1 / 1C / PRS 101 / LMG 12228) GN=PA5507 PE=4 SV=1	1	1	1	1	7.4	7.4	7.4	24.262	217	217	0.0068259	5.6153	3443700	0				193	1338	TRUE	1351	2388	4467	4467
tr|Q9HTD1|Q9HTD1_PSEAE	tr|Q9HTD1|Q9HTD1_PSEAE	9	9	9	>tr|Q9HTD1|Q9HTD1_PSEAE Probable transcarboxylase subunit OS=Pseudomonas aeruginosa (strain ATCC 15692 / PAO1 / 1C / PRS 101 / LMG 12228) GN=PA5435 PE=4 SV=1	1	9	9	9	24.9	24.9	24.9	66.095	607	607	0	57.482	64409000	22				194	27;135;546;931;1102;1395;1396;1469;1470	True;True;True;True;True;True;True;True;True	27;136;550;939;1113;1408;1409;1482;1483	44;45;247;248;974;975;1660;1661;1958;1959;2494;2495;2614;2615;2616	74;75;76;77;78;505;506;507;508;1845;1846;1847;1848;3134;3135;3658;3659;4642;4643;4826;4827;4828	76;508;1845;3134;3659;4642;4643;4826;4827
tr|Q9HTD9|Q9HTD9_PSEAE	tr|Q9HTD9|Q9HTD9_PSEAE	10	10	10	>tr|Q9HTD9|Q9HTD9_PSEAE Alcohol dehydrogenase OS=Pseudomonas aeruginosa (strain ATCC 15692 / PAO1 / 1C / PRS 101 / LMG 12228) GN=adhA PE=1 SV=1	1	10	10	10	47.4	47.4	47.4	35.911	342	342	0	75.643	153530000	36				195	20;28;138;190;251;598;1042;1054;1080;1384	True;True;True;True;True;True;True;True;True;True	20;28;139;191;252;602;1053;1065;1091;1397	29;30;31;46;47;253;254;337;444;445;1063;1064;1864;1865;1882;1883;1921;2472;2473	53;54;55;56;79;80;81;82;83;513;514;515;657;870;871;872;873;874;875;876;2021;2022;2023;2024;3496;3497;3498;3499;3500;3501;3502;3531;3532;3533;3609;4606;4607	53;81;515;657;873;2023;3499;3532;3609;4607
tr|Q9HTL4|Q9HTL4_PSEAE	tr|Q9HTL4|Q9HTL4_PSEAE	1	1	1	>tr|Q9HTL4|Q9HTL4_PSEAE OxyR OS=Pseudomonas aeruginosa (strain ATCC 15692 / PAO1 / 1C / PRS 101 / LMG 12228) GN=oxyR PE=1 SV=1	1	1	1	1	5.8	5.8	5.8	34.295	310	310	0.0034722	5.6799	5231600	2				196	1293	TRUE	1306	2308;2309	4316;4317	4317
tr|Q9HTP2|Q9HTP2_PSEAE	tr|Q9HTP2|Q9HTP2_PSEAE	2	2	2	>tr|Q9HTP2|Q9HTP2_PSEAE Probable aldehyde dehydrogenase OS=Pseudomonas aeruginosa (strain ATCC 15692 / PAO1 / 1C / PRS 101 / LMG 12228) GN=PA5312 PE=3 SV=1	1	2	2	2	10.5	10.5	10.5	53.143	497	497	0	13.285	14596000	5				197	392;586	True;True	394;590	701;702;1042;1043	1402;1403;1404;1976;1977	1403;1977
tr|Q9HU24|Q9HU24_PSEAE	tr|Q9HU24|Q9HU24_PSEAE	1	1	1	>tr|Q9HU24|Q9HU24_PSEAE dTDP-glucose 4,6-dehydratase OS=Pseudomonas aeruginosa (strain ATCC 15692 / PAO1 / 1C / PRS 101 / LMG 12228) GN=rmlB PE=3 SV=1	1	1	1	1	3.1	3.1	3.1	39.542	352	352	0.0066445	5.5483	668580	2				198	1464	TRUE	1477	2606;2607	4815;4816	4816
tr|Q9HUD3|Q9HUD3_PSEAE	tr|Q9HUD3|Q9HUD3_PSEAE	5	5	5	>tr|Q9HUD3|Q9HUD3_PSEAE Malic enzyme OS=Pseudomonas aeruginosa (strain ATCC 15692 / PAO1 / 1C / PRS 101 / LMG 12228) GN=PA5046 PE=4 SV=1	1	5	5	5	19.9	19.9	19.9	45.428	422	422	0	44.195	37244000	14				199	10;806;866;1101;1223	True;True;True;True;True	10;812;872;1112;1235	14;15;1442;1443;1544;1956;1957;2188	20;21;22;23;24;2721;2722;2883;3653;3654;3655;3656;3657;4109	24;2722;2883;3653;4109
tr|Q9HUE2|Q9HUE2_PSEAE	tr|Q9HUE2|Q9HUE2_PSEAE	1	1	1	>tr|Q9HUE2|Q9HUE2_PSEAE Uncharacterized protein OS=Pseudomonas aeruginosa (strain ATCC 15692 / PAO1 / 1C / PRS 101 / LMG 12228) GN=PA5027 PE=3 SV=1	1	1	1	1	5.2	5.2	5.2	29.793	271	271	0	6.5299	6200800	0				200	987	TRUE	997	1776;1777	3351;3352	3352
tr|Q9HUE4|Q9HUE4_PSEAE	tr|Q9HUE4|Q9HUE4_PSEAE	3	3	3	>tr|Q9HUE4|Q9HUE4_PSEAE Homocysteine synthase OS=Pseudomonas aeruginosa (strain ATCC 15692 / PAO1 / 1C / PRS 101 / LMG 12228) GN=metY PE=3 SV=1	1	3	3	3	20.2	20.2	20.2	45.177	425	425	0	19.406	8151200	8				201	201;663;1278	True;True;True	202;668;1291	356;1173;2284;2285	686;2186;4272;4273;4274;4275;4276;4277	686;2186;4274
tr|Q9HUG0|Q9HUG0_PSEAE	tr|Q9HUG0|Q9HUG0_PSEAE	3	3	3	>tr|Q9HUG0|Q9HUG0_PSEAE Probable carbamoyl transferase OS=Pseudomonas aeruginosa (strain ATCC 15692 / PAO1 / 1C / PRS 101 / LMG 12228) GN=PA5005 PE=4 SV=1	1	3	3	3	9.9	9.9	9.9	66.079	585	585	0	17.43	26149000	5				202	347;349;645	True;True;True	349;351;649	616;620;621;1141;1142	1264;1269;1270;1271;1272;2129;2130	1264;1270;2130
tr|Q9HV54|Q9HV54_PSEAE	tr|Q9HV54|Q9HV54_PSEAE	3	3	3	>tr|Q9HV54|Q9HV54_PSEAE Transcription termination/antitermination protein NusA OS=Pseudomonas aeruginosa (strain ATCC 15692 / PAO1 / 1C / PRS 101 / LMG 12228) GN=nusA PE=3 SV=1	1	3	3	3	12.2	12.2	12.2	54.658	493	493	0	30.225	6755500	5				203	270;557;610	True;True;True	272;561;614	485;992;1081	1008;1872;1873;1874;2045	1008;1873;2045
tr|Q9HV96|Q9HV96_PSEAE	tr|Q9HV96|Q9HV96_PSEAE	4	4	4	>tr|Q9HV96|Q9HV96_PSEAE Uncharacterized protein OS=Pseudomonas aeruginosa (strain ATCC 15692 / PAO1 / 1C / PRS 101 / LMG 12228) GN=PA4701 PE=4 SV=1	1	4	4	4	10.2	10.2	10.2	58.376	520	520	0	28.435	38143000	10				204	617;656;888;1040	True;True;True;True	621;660;894;1051	1091;1092;1160;1161;1578;1862	2062;2063;2064;2156;2157;2158;2159;2160;2936;3494	2064;2156;2936;3494
tr|Q9HVA0|Q9HVA0_PSEAE	tr|Q9HVA0|Q9HVA0_PSEAE	1	1	1	>tr|Q9HVA0|Q9HVA0_PSEAE Acetolactate synthase OS=Pseudomonas aeruginosa (strain ATCC 15692 / PAO1 / 1C / PRS 101 / LMG 12228) GN=ilvI PE=3 SV=1	1	1	1	1	3.7	3.7	3.7	63.018	574	574	0	13.55	1910900	1				205	1444	TRUE	1457	2570	4751	4751
tr|Q9HVD5|Q9HVD5_PSEAE	tr|Q9HVD5|Q9HVD5_PSEAE	1	1	1	>tr|Q9HVD5|Q9HVD5_PSEAE Uncharacterized protein OS=Pseudomonas aeruginosa (strain ATCC 15692 / PAO1 / 1C / PRS 101 / LMG 12228) GN=PA4657 PE=4 SV=1	1	1	1	1	4	4	4	35.913	327	327	0	7.6578	270870	1				206	246	TRUE	247	436	850	850
tr|Q9HVJ1|Q9HVJ1_PSEAE	tr|Q9HVJ1|Q9HVJ1_PSEAE	6	6	6	>tr|Q9HVJ1|Q9HVJ1_PSEAE Probable ATP-binding component of ABC transporter OS=Pseudomonas aeruginosa (strain ATCC 15692 / PAO1 / 1C / PRS 101 / LMG 12228) GN=PA4595 PE=4 SV=1	1	6	6	6	18.1	18.1	18.1	61.32	554	554	0	40.546	33749000	7				207	253;455;625;758;1109;1362	True;True;True;True;True;True	254;459;629;764;1120;1375	448;815;1106;1349;1971;1972;2434;2435	880;1597;2082;2534;3673;3674;4552;4553	880;1597;2082;2534;3673;4553
tr|Q9HVS8|Q9HVS8_PSEAE	tr|Q9HVS8|Q9HVS8_PSEAE	1	1	1	>tr|Q9HVS8|Q9HVS8_PSEAE RoxR OS=Pseudomonas aeruginosa (strain ATCC 15692 / PAO1 / 1C / PRS 101 / LMG 12228) GN=roxR PE=4 SV=1	1	1	1	1	7.5	7.5	7.5	20.616	186	186	0	6.0222	670110	2				208	1350	TRUE	1363	2411;2412	4502;4503	4503
tr|Q9HVU0|Q9HVU0_PSEAE	tr|Q9HVU0|Q9HVU0_PSEAE	4	4	4	>tr|Q9HVU0|Q9HVU0_PSEAE Rod shape-determining protein MreB OS=Pseudomonas aeruginosa (strain ATCC 15692 / PAO1 / 1C / PRS 101 / LMG 12228) GN=mreB PE=4 SV=1	1	4	4	4	19.1	19.1	19.1	36.976	345	345	0	35.163	14282000	11				209	514;642;1041;1114	True;True;True;True	518;646;1052;1125	923;1136;1863;1977;1978;1979;1980	1771;2123;3495;3680;3681;3682;3683;3684;3685;3686;3687;3688;3689;3690	1771;2123;3495;3683
tr|Q9HVY4|Q9HVY4_PSEAE	tr|Q9HVY4|Q9HVY4_PSEAE	1	1	1	>tr|Q9HVY4|Q9HVY4_PSEAE Ubiquinol-cytochrome c reductase iron-sulfur subunit OS=Pseudomonas aeruginosa (strain ATCC 15692 / PAO1 / 1C / PRS 101 / LMG 12228) GN=PA4431 PE=4 SV=1	1	1	1	1	5.6	5.6	5.6	20.828	197	197	0	6.1848	163340	1				210	173	TRUE	174	311	615	615
tr|Q9HVY5|Q9HVY5_PSEAE	tr|Q9HVY5|Q9HVY5_PSEAE	2	2	2	>tr|Q9HVY5|Q9HVY5_PSEAE Cytochrome b OS=Pseudomonas aeruginosa (strain ATCC 15692 / PAO1 / 1C / PRS 101 / LMG 12228) GN=PA4430 PE=3 SV=1	1	2	2	2	6.7	6.7	6.7	46.072	403	403	0	17.097	15962000	6				211	434;1240	True;True	437;1252	769;770;2218;2219	1506;1507;4166;4167;4168;4169	1506;4168
tr|Q9HVY6|Q9HVY6_PSEAE	tr|Q9HVY6|Q9HVY6_PSEAE	2	2	2	>tr|Q9HVY6|Q9HVY6_PSEAE Probable cytochrome c1 OS=Pseudomonas aeruginosa (strain ATCC 15692 / PAO1 / 1C / PRS 101 / LMG 12228) GN=PA4429 PE=4 SV=1	1	2	2	2	18.1	18.1	18.1	28.993	260	260	0	13.181	23150000	5				212	1115;1272	True;True	1126;1285	1981;2274;2275	3691;4258;4259;4260;4261	3691;4261
tr|Q9HW15|Q9HW15_PSEAE	tr|Q9HW15|Q9HW15_PSEAE	2	2	2	>tr|Q9HW15|Q9HW15_PSEAE Probable short-chain dehydrogenase OS=Pseudomonas aeruginosa (strain ATCC 15692 / PAO1 / 1C / PRS 101 / LMG 12228) GN=speA PE=4 SV=1	1	2	2	2	12.7	12.7	12.7	26.72	252	252	0	11.468	8827100	3				213	746;1286	True;True	752;1299	1332;2296	2509;4292;4293	2509;4292
tr|Q9HW32|Q9HW32_PSEAE	tr|Q9HW32|Q9HW32_PSEAE	1	1	1	>tr|Q9HW32|Q9HW32_PSEAE Insulin-cleaving metalloproteinase outer membrane protein OS=Pseudomonas aeruginosa (strain ATCC 15692 / PAO1 / 1C / PRS 101 / LMG 12228) GN=icmP PE=4 SV=1	1	1	1	1	5.2	5.2	5.2	47.23	446	446	0	13.9	452500	1				214	33	TRUE	33	57	99	99
tr|Q9HW49|Q9HW49_PSEAE	tr|Q9HW49|Q9HW49_PSEAE	8	8	8	>tr|Q9HW49|Q9HW49_PSEAE Uncharacterized protein OS=Pseudomonas aeruginosa (strain ATCC 15692 / PAO1 / 1C / PRS 101 / LMG 12228) GN=PA4352 PE=3 SV=1	1	8	8	8	44.8	44.8	44.8	30.972	286	286	0	49.141	52598000	34				215	211;290;658;741;1051;1318;1321;1322	True;True;True;True;True;True;True;True	212;292;662;747;1062;1331;1334;1335	374;375;517;1163;1164;1324;1878;2353;2354;2358;2359	710;711;712;713;714;715;716;717;718;719;720;721;722;723;724;1060;2162;2163;2164;2497;3526;4400;4401;4402;4403;4404;4405;4406;4407;4408;4409;4410;4411;4412;4413;4417;4418	712;1060;2163;2497;3526;4400;4417;4418
tr|Q9HW68|Q9HW68_PSEAE	tr|Q9HW68|Q9HW68_PSEAE	4	4	4	>tr|Q9HW68|Q9HW68_PSEAE Probable fumarase OS=Pseudomonas aeruginosa (strain ATCC 15692 / PAO1 / 1C / PRS 101 / LMG 12228) GN=PA4333 PE=4 SV=1	1	4	4	4	15.4	15.4	15.4	54.763	507	507	0	29.875	9168100	4				216	205;277;917;1061	True;True;True;True	206;279;925;1072	364;498;1633;1893	696;1029;3087;3552;3553	696;1029;3087;3552
tr|Q9HW72|Q9HW72_PSEAE	tr|Q9HW72|Q9HW72_PSEAE	4	4	4	>tr|Q9HW72|Q9HW72_PSEAE Pyruvate kinase OS=Pseudomonas aeruginosa (strain ATCC 15692 / PAO1 / 1C / PRS 101 / LMG 12228) GN=pykA PE=3 SV=1	1	4	4	4	17.2	17.2	17.2	52.252	483	483	0	24.924	20540000	9				217	48;447;602;699	True;True;True;True	48;451;606;705	83;84;799;800;1070;1241;1242	142;143;144;1575;1576;2031;2339;2340;2341;2342	143;1576;2031;2339
tr|Q9HWG9|Q9HWG9_PSEAE	tr|Q9HWG9|Q9HWG9_PSEAE	4	4	4	>tr|Q9HWG9|Q9HWG9_PSEAE Flavin-containing monooxygenase OS=Pseudomonas aeruginosa (strain ATCC 15692 / PAO1 / 1C / PRS 101 / LMG 12228) GN=phzS PE=1 SV=1	1	4	4	4	20.6	20.6	20.6	43.644	402	402	0	32.914	45918000	22				218	242;694;885;1473	True;True;True;True	243;699;700;891;1486	429;1229;1230;1231;1232;1573;1574;2620;2621	837;2310;2311;2312;2313;2314;2315;2316;2317;2318;2319;2320;2321;2322;2323;2324;2927;2928;2929;4832;4833;4834	837;2314;2927;4832	12	318
tr|Q9HWP8|Q9HWP8_PSEAE	tr|Q9HWP8|Q9HWP8_PSEAE	1	1	1	>tr|Q9HWP8|Q9HWP8_PSEAE Cytochrome c oxidase subunit (Cbb3-type) OS=Pseudomonas aeruginosa (strain ATCC 15692 / PAO1 / 1C / PRS 101 / LMG 12228) GN=PA4133 PE=3 SV=1	1	1	1	1	2.5	2.5	2.5	53.318	475	475	0	6.1717	740530	1				219	1052	TRUE	1063	1879	3527	3527
tr|Q9HWQ0|Q9HWQ0_PSEAE	tr|Q9HWQ0|Q9HWQ0_PSEAE	5	5	5	>tr|Q9HWQ0|Q9HWQ0_PSEAE Probable iron-sulfur protein OS=Pseudomonas aeruginosa (strain ATCC 15692 / PAO1 / 1C / PRS 101 / LMG 12228) GN=PA4131 PE=4 SV=1	1	5	5	5	12.4	12.4	12.4	63.991	573	573	0	41.435	54499000	11				220	75;367;499;674;858	True;True;True;True;True	75;369;503;679;864	132;133;653;654;892;893;1202;1532	256;257;1329;1330;1331;1332;1715;1716;2263;2264;2860	256;1331;1715;2263;2860
tr|Q9HX05|Q9HX05_PSEAE;tr|Q9I2C4|Q9I2C4_PSEAE	tr|Q9HX05|Q9HX05_PSEAE;tr|Q9I2C4|Q9I2C4_PSEAE	5;4	5;4	5;4	>tr|Q9HX05|Q9HX05_PSEAE Probable aldehyde dehydrogenase OS=Pseudomonas aeruginosa (strain ATCC 15692 / PAO1 / 1C / PRS 101 / LMG 12228) GN=PA4022 PE=3 SV=1;>tr|Q9I2C4|Q9I2C4_PSEAE NAD+ dependent aldehyde dehydrogenase ExaC OS=Pseudomonas aeruginosa (strain	2	5	5	5	14.2	14.2	14.2	54.979	506	506;506	0	37.438	33950000	6				221	132;133;380;767;1167	True;True;True;True;True	133;134;382;773;1179	242;243;244;678;1362;1363;2076	498;499;500;1364;2548;2549;3843	498;499;1364;2549;3843
tr|Q9HX44|Q9HX44_PSEAE	tr|Q9HX44|Q9HX44_PSEAE	2	2	2	>tr|Q9HX44|Q9HX44_PSEAE Probable acyl-CoA dehydrogenase OS=Pseudomonas aeruginosa (strain ATCC 15692 / PAO1 / 1C / PRS 101 / LMG 12228) GN=PA3972 PE=3 SV=1	1	2	2	2	8.4	8.4	8.4	60.338	549	549	0	17.094	12336000	9				222	818;1351	True;True	824;1364	1461;1462;2413;2414	2754;2755;4504;4505;4506;4507;4508;4509;4510;4511	2755;4510
tr|Q9HXM5|Q9HXM5_PSEAE	tr|Q9HXM5|Q9HXM5_PSEAE	1	1	1	>tr|Q9HXM5|Q9HXM5_PSEAE Inosine-5-monophosphate dehydrogenase OS=Pseudomonas aeruginosa (strain ATCC 15692 / PAO1 / 1C / PRS 101 / LMG 12228) GN=guaB PE=1 SV=1	1	1	1	1	2.9	2.9	2.9	51.707	489	489	0	6.441	197770	2				223	1312	TRUE	1325	2343;2344	4390;4391	4390
tr|Q9HY01|Q9HY01_PSEAE	tr|Q9HY01|Q9HY01_PSEAE	3	3	3	>tr|Q9HY01|Q9HY01_PSEAE S-(hydroxymethyl)glutathione dehydrogenase OS=Pseudomonas aeruginosa (strain ATCC 15692 / PAO1 / 1C / PRS 101 / LMG 12228) GN=adhC PE=3 SV=1	1	3	3	3	9.5	9.5	9.5	39.208	370	370	0	17.828	21503000	8				224	350;629;1106	True;True;True	352;633;1117	622;623;1111;1112;1965;1966	1273;1274;1275;1276;2087;2088;3667;3668	1273;2088;3667
tr|Q9HY12|Q9HY12_PSEAE	tr|Q9HY12|Q9HY12_PSEAE	2	2	2	>tr|Q9HY12|Q9HY12_PSEAE Uncharacterized protein OS=Pseudomonas aeruginosa (strain ATCC 15692 / PAO1 / 1C / PRS 101 / LMG 12228) GN=PA3614 PE=4 SV=1	1	2	2	2	4.1	4.1	4.1	51.921	467	467	0	12.832	6576100	2				225	764;1006	True;True	770;1016	1358;1359;1807	2544;2545;3395	2545;3395
tr|Q9HY13|Q9HY13_PSEAE	tr|Q9HY13|Q9HY13_PSEAE	12	12	12	>tr|Q9HY13|Q9HY13_PSEAE Uncharacterized protein OS=Pseudomonas aeruginosa (strain ATCC 15692 / PAO1 / 1C / PRS 101 / LMG 12228) GN=PA3613 PE=4 SV=1	1	12	12	12	22.2	22.2	22.2	88.378	801	801	0	87.646	74061000	27				226	214;489;734;760;901;1030;1191;1194;1251;1330;1357;1488	True;True;True;True;True;True;True;True;True;True;True;True	215;493;740;766;908;1041;1203;1206;1263;1343;1370;1501	378;379;874;875;1311;1351;1601;1602;1849;2129;2134;2135;2234;2235;2371;2372;2426;2427;2643;2644	727;728;1686;1687;2480;2536;3018;3019;3473;3961;3962;3971;3972;3973;4189;4190;4191;4192;4193;4194;4434;4435;4541;4542;4543;4544;4878;4879	727;1686;2480;2536;3018;3473;3961;3972;4190;4434;4542;4879
tr|Q9HY77|Q9HY77_PSEAE	tr|Q9HY77|Q9HY77_PSEAE	2	2	2	>tr|Q9HY77|Q9HY77_PSEAE Glutaredoxin OS=Pseudomonas aeruginosa (strain ATCC 15692 / PAO1 / 1C / PRS 101 / LMG 12228) GN=PA3533 PE=3 SV=1	1	2	2	2	31.5	31.5	31.5	11.843	108	108	0	20.513	16010000	7				227	399;922	True;True	402;930	716;717;1643;1644	1435;1436;1437;3107;3108;3109;3110	1437;3110
tr|Q9HY79|Q9HY79_PSEAE	tr|Q9HY79|Q9HY79_PSEAE	2	2	2	>tr|Q9HY79|Q9HY79_PSEAE Ferroxidase OS=Pseudomonas aeruginosa (strain ATCC 15692 / PAO1 / 1C / PRS 101 / LMG 12228) GN=bfrB PE=1 SV=1	1	2	2	2	20.3	20.3	20.3	18.553	158	158	0	13.102	31447000	5				228	649;650	True;True	653;654	1148;1149;1150;1151	2140;2141;2142;2143;2144	2140;2144
tr|Q9HY81|Q9HY81_PSEAE	tr|Q9HY81|Q9HY81_PSEAE	6	6	6	>tr|Q9HY81|Q9HY81_PSEAE Probable peroxidase OS=Pseudomonas aeruginosa (strain ATCC 15692 / PAO1 / 1C / PRS 101 / LMG 12228) GN=PA3529 PE=1 SV=1	1	6	6	6	35.5	35.5	35.5	21.822	200	200	0	42.619	81909000	18				229	217;453;1021;1037;1161;1480	True;True;True;True;True;True	218;457;1031;1048;1173;1493	384;385;812;813;1831;1832;1833;1858;2066;2067;2631;2632	736;737;738;739;740;741;1594;1595;3436;3437;3438;3490;3826;3827;3828;3829;3830;4851;4852	738;1595;3437;3490;3827;4852
tr|Q9HYC8|Q9HYC8_PSEAE	tr|Q9HYC8|Q9HYC8_PSEAE	1	1	1	>tr|Q9HYC8|Q9HYC8_PSEAE Iron-sulfur cluster carrier protein OS=Pseudomonas aeruginosa (strain ATCC 15692 / PAO1 / 1C / PRS 101 / LMG 12228) GN=PA3481 PE=3 SV=1	1	1	1	1	7.1	7.1	7.1	38.888	364	364	0	6.763	11197000	5				230	1325	TRUE	1338	2362;2363	4421;4422;4423;4424;4425	4421
tr|Q9HYR4|Q9HYR4_PSEAE	tr|Q9HYR4|Q9HYR4_PSEAE	3	3	3	>tr|Q9HYR4|Q9HYR4_PSEAE Cytochrome P450 OS=Pseudomonas aeruginosa (strain ATCC 15692 / PAO1 / 1C / PRS 101 / LMG 12228) GN=PA3331 PE=3 SV=1	1	3	3	3	11.5	11.5	11.5	46.377	418	418	0	18.665	12394000	4				231	168;401;439	True;True;True	169;404;442	302;303;719;779;780	604;605;1439;1522;1523	604;1439;1523
tr|Q9HYR5|Q9HYR5_PSEAE	tr|Q9HYR5|Q9HYR5_PSEAE	3	3	3	>tr|Q9HYR5|Q9HYR5_PSEAE Probable short chain dehydrogenase OS=Pseudomonas aeruginosa (strain ATCC 15692 / PAO1 / 1C / PRS 101 / LMG 12228) GN=PA3330 PE=4 SV=1	1	3	3	3	19.1	19.1	19.1	32.031	304	304	0	22.271	20812000	8				232	100;897;945	True;True;True	101;904;953	184;1595;1596;1686	396;397;398;3002;3003;3004;3005;3006;3168	398;3004;3168
tr|Q9HYR6|Q9HYR6_PSEAE	tr|Q9HYR6|Q9HYR6_PSEAE	2	2	2	>tr|Q9HYR6|Q9HYR6_PSEAE Uncharacterized protein OS=Pseudomonas aeruginosa (strain ATCC 15692 / PAO1 / 1C / PRS 101 / LMG 12228) GN=PA3329 PE=4 SV=1	1	2	2	2	10.9	10.9	10.9	49.134	442	442	0	15.687	24920000	11				233	237;736	True;True	238;742	420;421;1314;1315	823;824;825;826;827;828;829;2483;2484;2485;2486	827;2483
tr|Q9HYR7|Q9HYR7_PSEAE	tr|Q9HYR7|Q9HYR7_PSEAE	3	3	3	>tr|Q9HYR7|Q9HYR7_PSEAE Probable FAD-dependent monooxygenase OS=Pseudomonas aeruginosa (strain ATCC 15692 / PAO1 / 1C / PRS 101 / LMG 12228) GN=PA3328 PE=4 SV=1	1	3	3	3	12.1	12.1	12.1	42.498	388	388	0	27.314	20919000	7				234	181;204;414	True;True;True	182;205;417	323;324;362;363;738	633;634;693;694;695;1460;1461	634;693;1461
tr|Q9HYR8|Q9HYR8_PSEAE	tr|Q9HYR8|Q9HYR8_PSEAE	28	28	28	>tr|Q9HYR8|Q9HYR8_PSEAE Probable non-ribosomal peptide synthetase OS=Pseudomonas aeruginosa (strain ATCC 15692 / PAO1 / 1C / PRS 101 / LMG 12228) GN=PA3327 PE=4 SV=1	1	28	28	28	19.7	19.7	19.7	259.4	2352	2352	0	193.21	167220000	67				235	18;59;66;85;123;129;184;218;228;318;433;521;566;605;651;766;781;852;960;977;1107;1159;1163;1188;1195;1365;1368;1445	True;True;True;True;True;True;True;True;True;True;True;True;True;True;True;True;True;True;True;True;True;True;True;True;True;True;True;True	18;59;66;86;124;130;185;219;229;320;436;525;570;609;655;772;787;858;968;987;1118;1171;1175;1200;1207;1378;1381;1458	26;105;116;117;160;161;224;225;226;227;238;239;328;386;400;401;569;570;767;768;934;935;1005;1006;1074;1152;1153;1361;1391;1522;1523;1712;1713;1754;1967;1968;2064;2070;2071;2122;2136;2439;2440;2444;2571;2572	44;198;214;215;216;217;218;219;220;221;222;223;365;366;468;469;470;471;472;473;474;475;494;495;639;742;743;759;760;761;762;763;764;1170;1171;1504;1505;1783;1784;1903;1904;2035;2145;2146;2547;2618;2847;2848;3212;3213;3283;3284;3669;3670;3824;3834;3835;3836;3837;3938;3939;3974;4557;4558;4559;4563;4564;4565;4752;4753;4754	44;198;214;366;470;495;639;742;759;1171;1505;1784;1903;2035;2146;2547;2618;2847;3212;3283;3669;3824;3837;3938;3974;4559;4564;4754
tr|Q9HYT5|Q9HYT5_PSEAE	tr|Q9HYT5|Q9HYT5_PSEAE	7	7	7	>tr|Q9HYT5|Q9HYT5_PSEAE Uncharacterized protein OS=Pseudomonas aeruginosa (strain ATCC 15692 / PAO1 / 1C / PRS 101 / LMG 12228) GN=PA3309 PE=3 SV=1	1	7	7	7	61.6	61.6	61.6	16.496	151	151	0	54.841	126350000	23				236	295;577;601;659;831;1295;1343	True;True;True;True;True;True;True	297;581;605;663;837;1308;1356	527;1025;1026;1027;1069;1165;1166;1484;1485;2311;2396;2397	1073;1956;1957;1958;1959;2030;2165;2166;2167;2168;2798;2799;2800;2801;2802;2803;2804;2805;4319;4479;4480;4481;4482	1073;1959;2030;2165;2802;4319;4479
tr|Q9HYZ6|Q9HYZ6_PSEAE	tr|Q9HYZ6|Q9HYZ6_PSEAE	2	2	2	>tr|Q9HYZ6|Q9HYZ6_PSEAE Site-determining protein OS=Pseudomonas aeruginosa (strain ATCC 15692 / PAO1 / 1C / PRS 101 / LMG 12228) GN=minD PE=3 SV=1	1	2	2	2	10	10	10	29.635	271	271	0	12.55	16059000	3				237	817;1263	True;True	823;1276	1459;1460;2260	2752;2753;4236	2752;4236
tr|Q9HZ78|Q9HZ78_PSEAE	tr|Q9HZ78|Q9HZ78_PSEAE	4	4	4	>tr|Q9HZ78|Q9HZ78_PSEAE LPS biosynthesis protein WbpG OS=Pseudomonas aeruginosa (strain ATCC 15692 / PAO1 / 1C / PRS 101 / LMG 12228) GN=wbpG PE=4 SV=1	1	4	4	4	15.9	15.9	15.9	43.503	377	377	0	25.319	26845000	7				238	43;695;775;1269	True;True;True;True	43;701;781;1282	74;75;1233;1377;1378;2269	125;126;2325;2580;2581;2582;4248	125;2325;2582;4248
tr|Q9HZC5|Q9HZC5_PSEAE	tr|Q9HZC5|Q9HZC5_PSEAE	5	5	5	>tr|Q9HZC5|Q9HZC5_PSEAE Aminopeptidase N OS=Pseudomonas aeruginosa (strain ATCC 15692 / PAO1 / 1C / PRS 101 / LMG 12228) GN=pepN PE=4 SV=1	1	5	5	5	8.6	8.6	8.6	100.05	885	885	0	39.822	26765000	8				239	423;446;450;646;754	True;True;True;True;True	426;450;454;650;760	751;752;797;798;806;807;1143;1345	1480;1481;1573;1574;1584;1585;2131;2530	1481;1573;1585;2131;2530
tr|Q9HZK3|Q9HZK3_PSEAE	tr|Q9HZK3|Q9HZK3_PSEAE	1	1	1	>tr|Q9HZK3|Q9HZK3_PSEAE Transcription-repair-coupling factor OS=Pseudomonas aeruginosa (strain ATCC 15692 / PAO1 / 1C / PRS 101 / LMG 12228) GN=mfd PE=3 SV=1	1	1	1	1	1.2	1.2	1.2	128.79	1148	1148	0	6.2658	1019800	1				240	1408	TRUE	1421	2513	4666	4666
tr|Q9HZK4|Q9HZK4_PSEAE	tr|Q9HZK4|Q9HZK4_PSEAE	10	10	10	>tr|Q9HZK4|Q9HZK4_PSEAE Glyceraldehyde-3-phosphate dehydrogenase OS=Pseudomonas aeruginosa (strain ATCC 15692 / PAO1 / 1C / PRS 101 / LMG 12228) GN=PA3001 PE=3 SV=1	1	10	10	10	26.9	26.9	26.9	50.111	461	461	0	80.64	135730000	23				241	314;330;776;873;913;986;1095;1129;1376;1386	True;True;True;True;True;True;True;True;True;True	316;332;782;879;921;996;1106;1140;1389;1399	559;560;589;590;1379;1380;1556;1626;1774;1775;1943;1944;1945;1946;2007;2008;2454;2455;2476;2477	1149;1150;1214;1215;1216;1217;2583;2584;2585;2908;3076;3349;3350;3635;3636;3637;3638;3639;3728;3729;4577;4578;4579;4610;4611	1150;1215;2584;2908;3076;3350;3635;3728;4577;4611
tr|Q9I028|Q9I028_PSEAE	tr|Q9I028|Q9I028_PSEAE	5	5	5	>tr|Q9I028|Q9I028_PSEAE Probable acyl-CoA dehydrogenase OS=Pseudomonas aeruginosa (strain ATCC 15692 / PAO1 / 1C / PRS 101 / LMG 12228) GN=PA2815 PE=4 SV=1	1	5	5	5	11.8	11.8	11.8	88.762	815	815	0	34.553	36871000	8				242	506;657;779;1370;1392	True;True;True;True;True	510;661;785;1383;1405	908;1162;1384;1385;2447;2489;2490	1740;2161;2598;2599;4569;4634;4635;4636	1740;2161;2599;4569;4635
tr|Q9I0L4|Q9I0L4_PSEAE	tr|Q9I0L4|Q9I0L4_PSEAE	10	10	10	>tr|Q9I0L4|Q9I0L4_PSEAE Isocitrate dehydrogenase OS=Pseudomonas aeruginosa (strain ATCC 15692 / PAO1 / 1C / PRS 101 / LMG 12228) GN=idh PE=4 SV=1	1	10	10	10	24.3	24.3	24.3	81.633	741	741	0	83.595	71202000	21				243	131;207;289;454;484;513;652;951;1377;1436	True;True;True;True;True;True;True;True;True;True	132;208;291;458;488;517;656;959;1390;1449	241;367;368;515;516;814;867;921;922;1154;1155;1696;1697;2456;2556	497;700;701;1056;1057;1058;1059;1596;1674;1675;1769;1770;2147;2148;2149;2150;3183;3184;3185;4580;4734	497;700;1058;1596;1674;1770;2147;3183;4580;4734
tr|Q9I0L5|Q9I0L5_PSEAE	tr|Q9I0L5|Q9I0L5_PSEAE	20	20	20	>tr|Q9I0L5|Q9I0L5_PSEAE Isocitrate dehydrogenase [NADP] OS=Pseudomonas aeruginosa (strain ATCC 15692 / PAO1 / 1C / PRS 101 / LMG 12228) GN=icd PE=3 SV=1	1	20	20	20	51.2	51.2	51.2	45.577	418	418	0	180.38	461500000	83				244	128;196;234;235;291;368;432;444;534;579;580;589;715;716;1026;1271;1380;1438;1439;1456	True;True;True;True;True;True;True;True;True;True;True;True;True;True;True;True;True;True;True;True	129;197;235;236;293;370;435;448;538;583;584;593;721;722;1037;1284;1393;1451;1452;1469	236;237;347;348;413;414;415;416;417;418;518;519;520;521;655;765;766;791;792;793;794;956;1029;1030;1031;1032;1033;1048;1049;1275;1276;1277;1843;1844;2272;2273;2462;2463;2464;2465;2559;2560;2561;2562;2592;2593;2594;2595	489;490;491;492;493;669;670;671;672;673;674;808;809;810;811;812;813;814;815;816;817;818;819;820;821;1061;1062;1063;1064;1065;1066;1333;1502;1503;1561;1562;1563;1564;1565;1566;1567;1568;1569;1815;1961;1962;1963;1964;1965;1966;1988;1989;2401;2402;2403;2404;3461;3462;3463;3464;4255;4256;4257;4589;4590;4591;4592;4593;4594;4595;4596;4597;4598;4737;4738;4739;4740;4741;4742;4785;4786;4787;4788;4789;4790	489;672;809;815;1061;1333;1503;1565;1815;1962;1966;1988;2401;2403;3463;4257;4596;4738;4742;4789
tr|Q9I0M2|Q9I0M2_PSEAE	tr|Q9I0M2|Q9I0M2_PSEAE	1	1	1	>tr|Q9I0M2|Q9I0M2_PSEAE Thioredoxin reductase OS=Pseudomonas aeruginosa (strain ATCC 15692 / PAO1 / 1C / PRS 101 / LMG 12228) GN=trxB1 PE=3 SV=1	1	1	1	1	6	6	6	33.818	316	316	0	13.724	2854400	2				245	803	TRUE	809	1437	2713;2714	2714
tr|Q9I0T1|Q9I0T1_PSEAE	tr|Q9I0T1|Q9I0T1_PSEAE	10	10	10	>tr|Q9I0T1|Q9I0T1_PSEAE Probable acyl-CoA thiolase OS=Pseudomonas aeruginosa (strain ATCC 15692 / PAO1 / 1C / PRS 101 / LMG 12228) GN=PA2553 PE=3 SV=1	1	10	10	10	41.4	41.4	41.4	41.4	396	396	0	76.379	125470000	27				246	118;285;304;327;441;517;707;887;1243;1355	True;True;True;True;True;True;True;True;True;True	119;287;306;329;445;521;713;893;1255;1368	216;510;542;543;583;584;787;929;930;1254;1255;1576;1577;2222;2223;2423;2424	453;1050;1119;1120;1121;1122;1123;1189;1190;1191;1557;1778;1779;2362;2363;2364;2365;2932;2933;2934;2935;4172;4173;4174;4175;4176;4538;4539	453;1050;1121;1189;1557;1779;2365;2933;4172;4539
tr|Q9I0T2|Q9I0T2_PSEAE	tr|Q9I0T2|Q9I0T2_PSEAE	3	3	3	>tr|Q9I0T2|Q9I0T2_PSEAE Probable acyl-CoA dehydrogenase OS=Pseudomonas aeruginosa (strain ATCC 15692 / PAO1 / 1C / PRS 101 / LMG 12228) GN=PA2552 PE=3 SV=1	1	3	3	3	15.7	15.7	15.7	40.908	375	375	0	20.62	12725000	3				247	430;509;619	True;True;True	433;513;623	762;911;1096	1497;1743;2069	1497;1743;2069
tr|Q9I1E7|Q9I1E7_PSEAE	tr|Q9I1E7|Q9I1E7_PSEAE	1	1	1	>tr|Q9I1E7|Q9I1E7_PSEAE Alkyl hydroperoxide reductase AhpD OS=Pseudomonas aeruginosa (strain ATCC 15692 / PAO1 / 1C / PRS 101 / LMG 12228) GN=PA2331 PE=3 SV=1	1	1	1	1	5.9	5.9	5.9	19.904	186	186	0	5.9143	2749800	1				248	1242	TRUE	1254	2221	4171	4171
tr|Q9I1H3|Q9I1H3_PSEAE	tr|Q9I1H3|Q9I1H3_PSEAE	5	5	5	>tr|Q9I1H3|Q9I1H3_PSEAE AmbE OS=Pseudomonas aeruginosa (strain ATCC 15692 / PAO1 / 1C / PRS 101 / LMG 12228) GN=ambE PE=4 SV=1	1	5	5	5	4.2	4.2	4.2	229.04	2124	2124	0	36.557	28613000	13				249	0;112;819;847;1304	True;True;True;True;True	0;113;825;853;1317	0;1;204;205;1463;1464;1514;2326;2327	0;1;2;431;432;433;434;2756;2757;2838;4365;4366;4367	2;432;2757;2838;4366
tr|Q9I1H5|Q9I1H5_PSEAE	tr|Q9I1H5|Q9I1H5_PSEAE	1	1	1	>tr|Q9I1H5|Q9I1H5_PSEAE Chitinase OS=Pseudomonas aeruginosa (strain ATCC 15692 / PAO1 / 1C / PRS 101 / LMG 12228) GN=chiC PE=3 SV=1	1	1	1	1	6	6	6	53.042	483	483	0	6.3066	12846000	3				250	742	TRUE	748	1325;1326	2498;2499;2500	2500
tr|Q9I1I6|Q9I1I6_PSEAE	tr|Q9I1I6|Q9I1I6_PSEAE	1	1	1	>tr|Q9I1I6|Q9I1I6_PSEAE Uncharacterized protein OS=Pseudomonas aeruginosa (strain ATCC 15692 / PAO1 / 1C / PRS 101 / LMG 12228) GN=PA2289 PE=3 SV=1	1	1	1	1	4.1	4.1	4.1	78.178	710	710	0.006734	5.5705	5007200	1				251	1044	TRUE	1055	1868	3506	3506
tr|Q9I1N7|Q9I1N7_PSEAE	tr|Q9I1N7|Q9I1N7_PSEAE	5	5	5	>tr|Q9I1N7|Q9I1N7_PSEAE PslB OS=Pseudomonas aeruginosa (strain ATCC 15692 / PAO1 / 1C / PRS 101 / LMG 12228) GN=pslB PE=3 SV=1	1	5	5	5	18.2	18.2	18.2	53.515	488	488	0	45.418	25123000	10				252	44;360;732;1032;1120	True;True;True;True;True	44;362;738;1043;1131	76;641;642;1307;1308;1851;1990;1991	127;128;1308;1309;2474;2475;3475;3476;3704;3705	128;1308;2474;3476;3704
tr|Q9I1S0|Q9I1S0_PSEAE	tr|Q9I1S0|Q9I1S0_PSEAE	1	1	1	>tr|Q9I1S0|Q9I1S0_PSEAE Uncharacterized protein OS=Pseudomonas aeruginosa (strain ATCC 15692 / PAO1 / 1C / PRS 101 / LMG 12228) GN=PA2197 PE=4 SV=1	1	1	1	1	4.9	4.9	4.9	37.135	345	345	0.0067797	5.585	3749200	0				253	608	TRUE	612	1078	2042	2042
tr|Q9I1Z6|Q9I1Z6_PSEAE	tr|Q9I1Z6|Q9I1Z6_PSEAE	2	2	2	>tr|Q9I1Z6|Q9I1Z6_PSEAE Alcohol dehydrogenase (Zn-dependent) OS=Pseudomonas aeruginosa (strain ATCC 15692 / PAO1 / 1C / PRS 101 / LMG 12228) GN=PA2119 PE=3 SV=1	1	2	2	2	7.7	7.7	7.7	38.561	366	366	0	12.235	4956200	2				254	603;794	True;True	607;800	1071;1420	2032;2681	2032;2681
tr|Q9I246|Q9I246_PSEAE	tr|Q9I246|Q9I246_PSEAE	6	6	6	>tr|Q9I246|Q9I246_PSEAE Probable carbamoyl transferase OS=Pseudomonas aeruginosa (strain ATCC 15692 / PAO1 / 1C / PRS 101 / LMG 12228) GN=PA2069 PE=4 SV=1	1	6	6	6	12.4	12.4	12.4	63.382	574	574	0	41.646	60087000	13				255	241;381;581;692;823;1123	True;True;True;True;True;True	242;383;585;697;829;1134	428;679;680;1034;1035;1226;1227;1469;1470;1995;1996	836;1365;1366;1967;1968;2307;2308;2766;2767;3709;3710;3711;3712	836;1365;1967;2308;2766;3709
tr|Q9I296|Q9I296_PSEAE	tr|Q9I296|Q9I296_PSEAE	5	5	5	>tr|Q9I296|Q9I296_PSEAE Putative isovaleryl-CoA dehydrogenase OS=Pseudomonas aeruginosa (strain ATCC 15692 / PAO1 / 1C / PRS 101 / LMG 12228) GN=liuA PE=3 SV=1	1	5	5	5	19.1	19.1	19.1	42.209	387	387	0	36.151	16678000	5				256	195;482;978;1284;1367	True;True;True;True;True	196;486;988;1297;1380	346;864;1755;2293;2443	668;1670;3285;4288;4562	668;1670;3285;4288;4562
tr|Q9I297|Q9I297_PSEAE	tr|Q9I297|Q9I297_PSEAE	6	6	6	>tr|Q9I297|Q9I297_PSEAE Methylcrotonyl-CoA carboxylase, beta-subunit OS=Pseudomonas aeruginosa (strain ATCC 15692 / PAO1 / 1C / PRS 101 / LMG 12228) GN=liuB PE=1 SV=1	1	6	6	6	22.8	22.8	22.8	57.433	535	535	0	42.193	18975000	5				257	71;159;371;626;813;1092	True;True;True;True;True;True	71;160;373;630;819;1103	124;287;661;662;1107;1455;1938	236;573;1340;1341;2083;2745;3630	236;573;1341;2083;2745;3630
tr|Q9I299|Q9I299_PSEAE	tr|Q9I299|Q9I299_PSEAE	3	3	3	>tr|Q9I299|Q9I299_PSEAE Methylcrotonyl-CoA carboxylase, alpha-subunit (Biotin-containing) OS=Pseudomonas aeruginosa (strain ATCC 15692 / PAO1 / 1C / PRS 101 / LMG 12228) GN=liuD PE=1 SV=1	1	3	3	3	7.3	7.3	7.3	71.282	655	655	0	17.362	7325800	3				258	116;296;759	True;True;True	117;298;765	214;528;1350	451;1074;2535	451;1074;2535
tr|Q9I2A2|Q9I2A2_PSEAE	tr|Q9I2A2|Q9I2A2_PSEAE	1	1	1	>tr|Q9I2A2|Q9I2A2_PSEAE Fumarylacetoacetase OS=Pseudomonas aeruginosa (strain ATCC 15692 / PAO1 / 1C / PRS 101 / LMG 12228) GN=fahA PE=4 SV=1	1	1	1	1	4.9	4.9	4.9	46.341	432	432	0	6.3087	1572000	1				259	1112	TRUE	1123	1975	3678	3678
tr|Q9I2A9|Q9I2A9_PSEAE	tr|Q9I2A9|Q9I2A9_PSEAE	1	1	1	>tr|Q9I2A9|Q9I2A9_PSEAE DhcB, dehydrocarnitine CoA transferase, subunit B OS=Pseudomonas aeruginosa (strain ATCC 15692 / PAO1 / 1C / PRS 101 / LMG 12228) GN=dhcB PE=4 SV=1	1	1	1	1	11	11	11	23.187	218	218	0	8.6889	6545100	3				260	529	TRUE	533	947;948	1804;1805;1806	1806
tr|Q9I2V3|Q9I2V3_PSEAE	tr|Q9I2V3|Q9I2V3_PSEAE	2	2	2	>tr|Q9I2V3|Q9I2V3_PSEAE Uncharacterized protein OS=Pseudomonas aeruginosa (strain ATCC 15692 / PAO1 / 1C / PRS 101 / LMG 12228) GN=PA1789 PE=1 SV=1	1	2	2	2	11.5	11.5	11.5	31.273	287	287	0	12.999	9285800	3				261	644;1131	True;True	648;1142	1139;1140;2010	2127;2128;3732	2128;3732
tr|Q9I2W9|Q9I2W9_PSEAE	tr|Q9I2W9|Q9I2W9_PSEAE	10	10	10	>tr|Q9I2W9|Q9I2W9_PSEAE Phosphoenolpyruvate synthase OS=Pseudomonas aeruginosa (strain ATCC 15692 / PAO1 / 1C / PRS 101 / LMG 12228) GN=ppsA PE=3 SV=1	1	10	10	10	16.3	16.3	16.3	85.816	791	791	0	85.346	98536000	20				262	50;115;383;396;662;765;905;996;1154;1228	True;True;True;True;True;True;True;True;True;True	50;116;385;399;667;771;912;1006;1165;1240	87;88;212;213;682;683;710;711;1172;1360;1609;1610;1792;1793;2053;2197;2198	152;153;448;449;450;1368;1369;1426;1427;2185;2546;3030;3031;3371;3372;3373;3374;3796;4121;4122;4123	152;450;1369;1427;2185;2546;3031;3373;3796;4121
tr|Q9I2Y5|Q9I2Y5_PSEAE	tr|Q9I2Y5|Q9I2Y5_PSEAE	2	2	2	>tr|Q9I2Y5|Q9I2Y5_PSEAE 2-dehydropantoate 2-reductase OS=Pseudomonas aeruginosa (strain ATCC 15692 / PAO1 / 1C / PRS 101 / LMG 12228) GN=PA1752 PE=3 SV=1	1	2	2	2	8.9	8.9	8.9	34.141	315	315	0	11.898	2506400	1				263	900;1364	True;True	907;1377	1600;2438	3017;4556	3017;4556
tr|Q9I2Z1|Q9I2Z1_PSEAE	tr|Q9I2Z1|Q9I2Z1_PSEAE	2	2	2	>tr|Q9I2Z1|Q9I2Z1_PSEAE Uncharacterized protein OS=Pseudomonas aeruginosa (strain ATCC 15692 / PAO1 / 1C / PRS 101 / LMG 12228) GN=PA1746 PE=4 SV=1	1	2	2	2	26.2	26.2	26.2	18.189	168	168	0	10.743	2427900	2				264	179;382	True;True	180;384	320;681	628;1367	628;1367
tr|Q9I3B2|Q9I3B2_PSEAE	tr|Q9I3B2|Q9I3B2_PSEAE	4	4	4	>tr|Q9I3B2|Q9I3B2_PSEAE Beta-ketoacyl-ACP synthase I OS=Pseudomonas aeruginosa (strain ATCC 15692 / PAO1 / 1C / PRS 101 / LMG 12228) GN=fabB PE=3 SV=1	1	4	4	4	13.8	13.8	13.8	42.806	405	405	0	27.288	36364000	12				265	274;384;435;437	True;True;True;True	276;386;438;440	494;684;685;686;771;772;775;776	1021;1370;1371;1372;1508;1509;1510;1511;1516;1517;1518;1519	1021;1372;1509;1516
tr|Q9I3D3|Q9I3D3_PSEAE	tr|Q9I3D3|Q9I3D3_PSEAE	21	21	21	>tr|Q9I3D3|Q9I3D3_PSEAE 2-oxoglutarate dehydrogenase (E1 subunit) OS=Pseudomonas aeruginosa (strain ATCC 15692 / PAO1 / 1C / PRS 101 / LMG 12228) GN=sucA PE=4 SV=1	1	21	21	21	30.2	30.2	30.2	105.88	943	943	0	161.91	214800000	73				266	222;232;248;338;348;362;415;526;606;607;702;845;846;869;912;939;944;1078;1169;1212;1483	True;True;True;True;True;True;True;True;True;True;True;True;True;True;True;True;True;True;True;True;True	223;233;249;340;350;364;418;530;610;611;708;851;852;875;919;920;947;952;1089;1181;1224;1496	390;391;410;411;439;440;603;617;618;619;645;646;739;942;943;1075;1076;1077;1246;1510;1511;1512;1513;1547;1548;1622;1623;1624;1625;1675;1676;1684;1685;1919;2078;2079;2172;2635	747;748;802;803;804;805;806;863;864;865;1232;1265;1266;1267;1268;1313;1314;1315;1462;1463;1464;1465;1466;1796;1797;1798;1799;2036;2037;2038;2039;2040;2041;2349;2834;2835;2836;2837;2886;2887;3054;3055;3056;3057;3058;3059;3060;3061;3062;3063;3064;3065;3066;3067;3068;3069;3070;3071;3072;3073;3074;3075;3152;3153;3162;3163;3164;3165;3166;3167;3607;3845;3846;4086;4856	748;805;864;1232;1265;1314;1465;1797;2036;2040;2349;2835;2837;2886;3070;3153;3166;3607;3845;4086;4856	13	592
tr|Q9I3D4|Q9I3D4_PSEAE	tr|Q9I3D4|Q9I3D4_PSEAE	5	5	5	>tr|Q9I3D4|Q9I3D4_PSEAE Succinate dehydrogenase (B subunit) OS=Pseudomonas aeruginosa (strain ATCC 15692 / PAO1 / 1C / PRS 101 / LMG 12228) GN=sdhB PE=4 SV=1	1	5	5	5	26	26	26	26.155	235	235	0	41.435	118880000	21				267	426;752;894;950;1348	True;True;True;True;True	429;758;901;958;1361	756;757;1341;1342;1589;1590;1694;1695;2407;2408;2409	1486;1487;1488;1489;1490;2521;2522;2523;2524;2525;2526;2527;2996;2997;3179;3180;3181;3182;4497;4498;4499	1488;2522;2997;3179;4499
tr|Q9I3D5|Q9I3D5_PSEAE	tr|Q9I3D5|Q9I3D5_PSEAE	14	14	14	>tr|Q9I3D5|Q9I3D5_PSEAE Succinate dehydrogenase flavoprotein subunit OS=Pseudomonas aeruginosa (strain ATCC 15692 / PAO1 / 1C / PRS 101 / LMG 12228) GN=sdhA PE=3 SV=1	1	14	14	14	29.2	29.2	29.2	63.531	590	590	0	139.66	310520000	76				268	212;458;459;464;495;594;595;664;709;711;788;1001;1233;1254	True;True;True;True;True;True;True;True;True;True;True;True;True;True	213;462;463;468;499;598;599;669;715;717;794;1011;1245;1267	376;820;821;822;823;831;832;884;885;1055;1056;1057;1058;1059;1060;1174;1175;1257;1258;1259;1260;1262;1263;1405;1406;1407;1408;1409;1410;1800;2207;2241;2242;2243	725;1607;1608;1609;1610;1611;1621;1622;1698;1699;1700;1701;1702;1703;1704;1996;1997;1998;1999;2000;2001;2002;2003;2004;2005;2006;2007;2008;2009;2010;2011;2012;2013;2014;2015;2016;2017;2018;2187;2188;2189;2190;2367;2368;2369;2370;2371;2372;2373;2374;2375;2376;2377;2379;2380;2645;2646;2647;2648;2649;2650;2651;2652;2653;2654;2655;2656;2657;2658;2659;2660;3383;4142;4143;4201;4202;4203	725;1608;1611;1622;1698;1999;2014;2187;2369;2379;2657;3383;4143;4202
tr|Q9I3G0|Q9I3G0_PSEAE	tr|Q9I3G0|Q9I3G0_PSEAE	2	2	2	>tr|Q9I3G0|Q9I3G0_PSEAE Cytochrome c oxidase, cbb3-type, CcoN subunit OS=Pseudomonas aeruginosa (strain ATCC 15692 / PAO1 / 1C / PRS 101 / LMG 12228) GN=ccoN2 PE=3 SV=1	1	2	2	2	6.1	6.1	6.1	53.09	475	475	0	14.702	23278000	8				269	1174;1270	True;True	1186;1283	2093;2094;2270;2271	3871;3872;4249;4250;4251;4252;4253;4254	3871;4249
tr|Q9I3G1|Q9I3G1_PSEAE	tr|Q9I3G1|Q9I3G1_PSEAE	3	3	3	>tr|Q9I3G1|Q9I3G1_PSEAE Cytochrome c oxidase, cbb3-type, CcoO subunit OS=Pseudomonas aeruginosa (strain ATCC 15692 / PAO1 / 1C / PRS 101 / LMG 12228) GN=ccoO2 PE=4 SV=1	1	3	3	3	25.7	25.7	25.7	22.778	202	202	0	32.36	22721000	9				270	958;1205;1230	True;True;True	966;1217;1242	1709;2154;2155;2156;2157;2201	3207;4021;4022;4023;4024;4025;4026;4027;4028;4128	3207;4021;4128
tr|Q9I3G2|Q9I3G2_PSEAE	tr|Q9I3G2|Q9I3G2_PSEAE	6	6	6	>tr|Q9I3G2|Q9I3G2_PSEAE Cbb3-type cytochrome c oxidase subunit OS=Pseudomonas aeruginosa (strain ATCC 15692 / PAO1 / 1C / PRS 101 / LMG 12228) GN=ccoP2 PE=3 SV=1	1	6	6	6	31.8	31.8	31.8	33.812	308	308	0	42.389	94592000	17				271	456;543;556;1204;1441;1450	True;True;True;True;True;True	460;547;560;1216;1454;1463	816;817;969;990;991;2151;2152;2153;2564;2565;2581;2582	1598;1599;1600;1601;1602;1603;1838;1868;1869;1870;1871;4018;4019;4020;4744;4745;4768;4769;4770	1601;1838;1869;4020;4744;4768
tr|Q9I3G3|Q9I3G3_PSEAE	tr|Q9I3G3|Q9I3G3_PSEAE	2	2	2	>tr|Q9I3G3|Q9I3G3_PSEAE Cytochrome c oxidase, cbb3-type, CcoN subunit OS=Pseudomonas aeruginosa (strain ATCC 15692 / PAO1 / 1C / PRS 101 / LMG 12228) GN=ccoN1 PE=3 SV=1	1	2	2	2	5.5	5.5	5.5	53.108	475	475	0	12.71	9873900	5				272	12;1168	True;True	12;1180	17;18;2077	27;28;29;30;3844	27;3844
tr|Q9I3G6|Q9I3G6_PSEAE	tr|Q9I3G6|Q9I3G6_PSEAE	2	2	2	>tr|Q9I3G6|Q9I3G6_PSEAE Probable ferredoxin OS=Pseudomonas aeruginosa (strain ATCC 15692 / PAO1 / 1C / PRS 101 / LMG 12228) GN=PA1551 PE=4 SV=1	1	2	2	2	4.9	4.9	4.9	53.62	471	471	0	16.149	12429000	3				273	524;604	True;True	528;608	939;1072;1073	1791;2033;2034	1791;2034
tr|Q9I3J1|Q9I3J1_PSEAE	tr|Q9I3J1|Q9I3J1_PSEAE	1	1	1	>tr|Q9I3J1|Q9I3J1_PSEAE Uncharacterized protein OS=Pseudomonas aeruginosa (strain ATCC 15692 / PAO1 / 1C / PRS 101 / LMG 12228) GN=PA1522 PE=4 SV=1	1	1	1	1	3.9	3.9	3.9	30.697	279	279	1	-2	622690	2	+			274	967	TRUE	975	1725;1726	3233;3234	3233	14;15	222;226
tr|Q9I3X2|Q9I3X2_PSEAE	tr|Q9I3X2|Q9I3X2_PSEAE	2	2	2	>tr|Q9I3X2|Q9I3X2_PSEAE Uncharacterized protein OS=Pseudomonas aeruginosa (strain ATCC 15692 / PAO1 / 1C / PRS 101 / LMG 12228) GN=PA1372 PE=4 SV=1	1	2	2	2	4.5	4.5	4.5	79.82	711	711	0	21.206	9347400	3				275	700;1007	True;True	706;1017	1243;1808	2343;2344;3396	2344;3396
tr|Q9I400|Q9I400_PSEAE	tr|Q9I400|Q9I400_PSEAE	1	1	1	>tr|Q9I400|Q9I400_PSEAE Probable short-chain dehydrogenase OS=Pseudomonas aeruginosa (strain ATCC 15692 / PAO1 / 1C / PRS 101 / LMG 12228) GN=PA1344 PE=4 SV=1	1	1	1	1	8.7	8.7	8.7	27.397	264	264	0.0068966	5.6378	1944000	1				276	1414	TRUE	1427	2524	4690	4690
tr|Q9I4I1|Q9I4I1_PSEAE	tr|Q9I4I1|Q9I4I1_PSEAE	10	10	10	>tr|Q9I4I1|Q9I4I1_PSEAE Ribonucleoside-diphosphate reductase OS=Pseudomonas aeruginosa (strain ATCC 15692 / PAO1 / 1C / PRS 101 / LMG 12228) GN=nrdA PE=3 SV=1	1	10	10	10	16.1	16.1	16.1	107.11	963	963	0	74.343	48409000	20				277	32;393;675;984;1031;1155;1160;1422;1423;1499	True;True;True;True;True;True;True;True;True;True	32;395;680;994;1042;1166;1172;1435;1436;1512	55;56;703;704;1203;1767;1768;1850;2054;2055;2065;2533;2534;2535;2660	95;96;97;98;1405;1406;1407;2265;2266;3306;3307;3474;3797;3798;3825;4701;4702;4703;4904;4905;4906	98;1407;2265;3306;3474;3797;3825;4701;4703;4905
tr|Q9I4I2|Q9I4I2_PSEAE	tr|Q9I4I2|Q9I4I2_PSEAE	4	4	4	>tr|Q9I4I2|Q9I4I2_PSEAE Ribonucleoside-diphosphate reductase subunit beta OS=Pseudomonas aeruginosa (strain ATCC 15692 / PAO1 / 1C / PRS 101 / LMG 12228) GN=nrdB PE=3 SV=1	1	4	4	4	16.6	16.6	16.6	47.386	415	415	0	44.892	16471000	5				278	120;555;1012;1394	True;True;True;True	121;559;1022;1407	219;988;989;1814;2493	461;1866;1867;3402;4641	461;1867;3402;4641
tr|Q9I4W5|Q9I4W5_PSEAE	tr|Q9I4W5|Q9I4W5_PSEAE	1	1	1	>tr|Q9I4W5|Q9I4W5_PSEAE Bacterioferritin comigratory protein OS=Pseudomonas aeruginosa (strain ATCC 15692 / PAO1 / 1C / PRS 101 / LMG 12228) GN=bcp PE=4 SV=1	1	1	1	1	12.1	12.1	12.1	17.352	157	157	0.0067568	5.5786	1712600	0				279	1045	TRUE	1056	1869	3507	3507
tr|Q9I4X1|Q9I4X1_PSEAE	tr|Q9I4X1|Q9I4X1_PSEAE	4	4	4	>tr|Q9I4X1|Q9I4X1_PSEAE PqsC OS=Pseudomonas aeruginosa (strain ATCC 15692 / PAO1 / 1C / PRS 101 / LMG 12228) GN=pqsC PE=1 SV=1	1	4	4	4	16.4	16.4	16.4	38.238	348	348	0	28.831	47988000	9				280	63;850;908;997	True;True;True;True	63;856;915;1007	111;112;1518;1519;1614;1615;1794;1795	206;207;208;2842;2843;3035;3036;3037;3375;3376	207;2843;3035;3375
tr|Q9I4X2|Q9I4X2_PSEAE	tr|Q9I4X2|Q9I4X2_PSEAE	2	2	2	>tr|Q9I4X2|Q9I4X2_PSEAE PqsB OS=Pseudomonas aeruginosa (strain ATCC 15692 / PAO1 / 1C / PRS 101 / LMG 12228) GN=pqsB PE=1 SV=1	1	2	2	2	7.8	7.8	7.8	30.5	283	283	0	14.163	11756000	4				281	164;738	True;True	165;744	296;1319;1320	587;588;2492;2493	587;2492
tr|Q9I5F5|Q9I5F5_PSEAE	tr|Q9I5F5|Q9I5F5_PSEAE	1	1	1	>tr|Q9I5F5|Q9I5F5_PSEAE Sodium/proline symporter PutP OS=Pseudomonas aeruginosa (strain ATCC 15692 / PAO1 / 1C / PRS 101 / LMG 12228) GN=putP PE=3 SV=1	1	1	1	1	1.8	1.8	1.8	54.413	506	506	0	6.3868	290790	1				282	400	TRUE	403	718	1438	1438
tr|Q9I5F6|Q9I5F6_PSEAE	tr|Q9I5F6|Q9I5F6_PSEAE	10	10	10	>tr|Q9I5F6|Q9I5F6_PSEAE Bifunctional protein PutA OS=Pseudomonas aeruginosa (strain ATCC 15692 / PAO1 / 1C / PRS 101 / LMG 12228) GN=putA PE=3 SV=1	1	10	10	10	12.7	12.7	12.7	115.63	1060	1060	0	92.256	70017000	26				283	227;893;1028;1285;1329;1369;1378;1387;1399;1451	True;True;True;True;True;True;True;True;True;True	228;900;1039;1298;1342;1382;1391;1400;1412;1464	398;399;1587;1588;1847;2294;2295;2369;2370;2445;2446;2457;2458;2478;2479;2499;2500;2583;2584	757;758;2993;2994;2995;3470;3471;4289;4290;4291;4432;4433;4566;4567;4568;4581;4582;4583;4612;4613;4649;4650;4651;4771;4772;4773	758;2993;3471;4289;4433;4566;4582;4613;4651;4773
tr|Q9I5H0|Q9I5H0_PSEAE	tr|Q9I5H0|Q9I5H0_PSEAE	1	1	1	>tr|Q9I5H0|Q9I5H0_PSEAE tRNA-modifying protein YgfZ OS=Pseudomonas aeruginosa (strain ATCC 15692 / PAO1 / 1C / PRS 101 / LMG 12228) GN=PA0759 PE=3 SV=1	1	1	1	1	8.3	8.3	8.3	33.667	314	314	0.0066667	5.5546	1272800	1				284	655	TRUE	659	1159	2155	2155
tr|Q9I5I5|Q9I5I5_PSEAE	tr|Q9I5I5|Q9I5I5_PSEAE	3	3	3	>tr|Q9I5I5|Q9I5I5_PSEAE Probable enoyl-CoA hydratase/isomerase OS=Pseudomonas aeruginosa (strain ATCC 15692 / PAO1 / 1C / PRS 101 / LMG 12228) GN=PA0744 PE=4 SV=1	1	3	3	3	13.9	13.9	13.9	40.589	367	367	0	17.245	17208000	6				285	468;620;756	True;True;True	472;624;762	838;839;1097;1098;1347	1631;1632;1633;2070;2071;2532	1633;2070;2532
tr|Q9I5U9|Q9I5U9_PSEAE	tr|Q9I5U9|Q9I5U9_PSEAE	19	19	19	>tr|Q9I5U9|Q9I5U9_PSEAE Uncharacterized protein OS=Pseudomonas aeruginosa (strain ATCC 15692 / PAO1 / 1C / PRS 101 / LMG 12228) GN=PA0588 PE=4 SV=1	1	19	19	19	35.9	35.9	35.9	73.722	640	640	0	155.81	257300000	64				286	14;69;151;272;539;540;808;820;826;837;838;911;928;952;995;1130;1206;1382;1430	True;True;True;True;True;True;True;True;True;True;True;True;True;True;True;True;True;True;True	14;69;152;274;543;544;814;826;832;843;844;918;936;960;1005;1141;1218;1395;1443	20;121;275;276;488;489;965;966;1446;1447;1448;1449;1465;1466;1474;1475;1496;1497;1498;1620;1621;1654;1655;1698;1699;1790;1791;2009;2158;2159;2468;2469;2546;2547;2548	32;230;231;553;554;1011;1012;1013;1832;1833;1834;2729;2730;2731;2732;2733;2734;2735;2736;2758;2759;2760;2761;2773;2774;2775;2776;2777;2778;2818;2819;2820;2821;3047;3048;3049;3050;3051;3052;3053;3123;3124;3125;3126;3186;3187;3188;3189;3190;3191;3367;3368;3369;3370;3730;3731;4029;4030;4031;4601;4602;4716;4717;4718	32;231;554;1011;1832;1833;2729;2760;2776;2820;2821;3048;3126;3189;3368;3731;4031;4601;4718
tr|Q9I5Y8|Q9I5Y8_PSEAE	tr|Q9I5Y8|Q9I5Y8_PSEAE	8	8	8	>tr|Q9I5Y8|Q9I5Y8_PSEAE Transketolase OS=Pseudomonas aeruginosa (strain ATCC 15692 / PAO1 / 1C / PRS 101 / LMG 12228) GN=tktA PE=1 SV=1	1	8	8	8	22.3	22.3	22.3	72.219	665	665	0	45.593	28058000	11				287	13;25;152;391;809;877;1241;1349	True;True;True;True;True;True;True;True	13;25;153;393;815;883;1253;1362	19;42;277;699;700;1450;1561;2220;2410	31;72;555;556;1400;1401;2737;2913;4170;4500;4501	31;72;556;1401;2737;2913;4170;4500
tr|Q9I612|Q9I612_PSEAE	tr|Q9I612|Q9I612_PSEAE	3	3	3	>tr|Q9I612|Q9I612_PSEAE Probable acyl-CoA dehydrogenase OS=Pseudomonas aeruginosa (strain ATCC 15692 / PAO1 / 1C / PRS 101 / LMG 12228) GN=PA0506 PE=3 SV=1	1	3	3	3	7.7	7.7	7.7	65.358	601	601	0	17.033	11410000	4				288	2;429;686	True;True;True	2;432;691	3;760;761;1215;1216	4;1493;1494;1495;1496;2284;2285	4;1495;2285
tr|Q9I659|Q9I659_PSEAE	tr|Q9I659|Q9I659_PSEAE	11	11	9	>tr|Q9I659|Q9I659_PSEAE Probable ClpA/B protease ATP binding subunit OS=Pseudomonas aeruginosa (strain ATCC 15692 / PAO1 / 1C / PRS 101 / LMG 12228) GN=PA0459 PE=4 SV=1	1	11	11	9	18.7	18.7	16	94.174	850	850	0	84.987	89848000	21				289	442;463;802;890;973;988;1025;1192;1340;1410;1471	True;True;True;True;True;True;True;True;True;True;True	446;467;808;896;982;998;1036;1204;1353;1423;1484	788;789;830;1435;1436;1580;1738;1739;1778;1779;1841;1842;2130;2131;2391;2392;2518;2617;2618	1558;1559;1620;2710;2711;2712;2939;3249;3250;3251;3353;3354;3459;3460;3963;3964;3965;4474;4475;4676;4829;4830	1558;1620;2711;2939;3249;3353;3460;3964;4474;4676;4829
tr|Q9I671|Q9I671_PSEAE	tr|Q9I671|Q9I671_PSEAE	7	7	7	>tr|Q9I671|Q9I671_PSEAE Glutaryl-CoA dehydrogenase OS=Pseudomonas aeruginosa (strain ATCC 15692 / PAO1 / 1C / PRS 101 / LMG 12228) GN=gcdH PE=3 SV=1	1	7	7	7	30.3	30.3	30.3	43.311	393	393	0	83.323	76677000	22				290	169;174;269;273;564;979;1148	True;True;True;True;True;True;True	170;175;271;275;568;989;1159	304;305;312;313;483;484;490;491;492;493;1002;1756;2044;2045	606;607;616;617;618;619;1004;1005;1006;1007;1014;1015;1016;1017;1018;1019;1020;1897;3286;3287;3779;3780;3781	606;619;1004;1016;1897;3287;3779
tr|Q9I672|Q9I672_PSEAE	tr|Q9I672|Q9I672_PSEAE	1	1	1	>tr|Q9I672|Q9I672_PSEAE Uncharacterized protein OS=Pseudomonas aeruginosa (strain ATCC 15692 / PAO1 / 1C / PRS 101 / LMG 12228) GN=PA0446 PE=4 SV=1	1	1	1	1	6.1	6.1	6.1	43.846	407	407	0	6.9776	911350	1				291	1335	TRUE	1348	2383	4461	4461
tr|Q9I687|Q9I687_PSEAE	tr|Q9I687|Q9I687_PSEAE	2	2	2	>tr|Q9I687|Q9I687_PSEAE Methylenetetrahydrofolate reductase OS=Pseudomonas aeruginosa (strain ATCC 15692 / PAO1 / 1C / PRS 101 / LMG 12228) GN=metF PE=3 SV=1	1	2	2	2	10	10	10	32.228	290	290	0	15.963	18275000	6				292	796;1457	True;True	802;1470	1422;1423;2596;2597	2684;2685;2686;2687;4791;4792	2687;4792
tr|Q9I688|Q9I688_PSEAE	tr|Q9I688|Q9I688_PSEAE	1	1	1	>tr|Q9I688|Q9I688_PSEAE Uncharacterized protein OS=Pseudomonas aeruginosa (strain ATCC 15692 / PAO1 / 1C / PRS 101 / LMG 12228) GN=PA0429 PE=4 SV=1	1	1	1	1	6.7	6.7	6.7	40.872	356	356	0	6.2441	1203100	2				293	223	TRUE	224	392	749;750	749
tr|Q9I689|Q9I689_PSEAE	tr|Q9I689|Q9I689_PSEAE	2	2	2	>tr|Q9I689|Q9I689_PSEAE ATP-dependent RNA helicase RhlE OS=Pseudomonas aeruginosa (strain ATCC 15692 / PAO1 / 1C / PRS 101 / LMG 12228) GN=rhlE PE=3 SV=1	1	2	2	2	5.6	5.6	5.6	70.111	639	639	0	11.118	1497000	3				294	224;611	True;True	225;615	393;394;1082	751;752;753;2046	751;2046
tr|Q9I696|Q9I696_PSEAE	tr|Q9I696|Q9I696_PSEAE	1	1	1	>tr|Q9I696|Q9I696_PSEAE Component of chemotactic signal transduction system OS=Pseudomonas aeruginosa (strain ATCC 15692 / PAO1 / 1C / PRS 101 / LMG 12228) GN=chpA PE=4 SV=1	1	1	1	1	0.9	0.9	0.9	268.57	2472	2472	0	7.1973	1071300	1				295	1412	TRUE	1425	2521	4679	4679
tr|Q9I6A0|Q9I6A0_PSEAE	tr|Q9I6A0|Q9I6A0_PSEAE	2	2	2	>tr|Q9I6A0|Q9I6A0_PSEAE Probable cystathionine gamma-lyase OS=Pseudomonas aeruginosa (strain ATCC 15692 / PAO1 / 1C / PRS 101 / LMG 12228) GN=PA0400 PE=3 SV=1	1	2	2	2	11.2	11.2	11.2	42.786	394	394	0	22.229	2051100	4				296	786;868	True;True	792;874	1402;1546	2640;2641;2642;2885	2641;2885
tr|Q9I6H5|Q9I6H5_PSEAE	tr|Q9I6H5|Q9I6H5_PSEAE	5	5	5	>tr|Q9I6H5|Q9I6H5_PSEAE D-3-phosphoglycerate dehydrogenase OS=Pseudomonas aeruginosa (strain ATCC 15692 / PAO1 / 1C / PRS 101 / LMG 12228) GN=serA PE=3 SV=1	1	5	5	5	16.1	16.1	16.1	44.216	409	409	0	36.661	38926000	29				297	9;428;497;1153;1176	True;True;True;True;True	9;431;501;1164;1188	12;13;759;888;889;2052;2096;2097;2098;2099;2100	16;17;18;19;1492;1707;1708;1709;1710;3795;3874;3875;3876;3877;3878;3879;3880;3881;3882;3883;3884;3885;3886;3887;3888;3889;3890;3891;3892	18;1492;1710;3795;3875
tr|Q9I6J2|Q9I6J2_PSEAE	tr|Q9I6J2|Q9I6J2_PSEAE	3	3	3	>tr|Q9I6J2|Q9I6J2_PSEAE Putrescine aminotransferase OS=Pseudomonas aeruginosa (strain ATCC 15692 / PAO1 / 1C / PRS 101 / LMG 12228) GN=spuC PE=3 SV=1	1	3	3	3	10.3	10.3	10.3	50.452	456	456	0	18.606	33062000	6				298	359;554;1449	True;True;True	361;558;1462	639;640;987;2579;2580	1305;1306;1307;1865;4766;4767	1307;1865;4767
tr|Q9I6Z1|Q9I6Z1_PSEAE	tr|Q9I6Z1|Q9I6Z1_PSEAE	4	4	4	>tr|Q9I6Z1|Q9I6Z1_PSEAE Uncharacterized protein OS=Pseudomonas aeruginosa (strain ATCC 15692 / PAO1 / 1C / PRS 101 / LMG 12228) GN=PA0141 PE=4 SV=1	1	4	4	4	15.8	15.8	15.8	34.463	298	298	0	26.295	17377000	6				299	953;1134;1427;1477	True;True;True;True	961;1145;1440;1490	1700;2016;2540;2626;2627	3192;3739;4708;4843;4844;4845	3192;3739;4708;4845
tr|Q9I6Z3|Q9I6Z3_PSEAE	tr|Q9I6Z3|Q9I6Z3_PSEAE	6	6	6	>tr|Q9I6Z3|Q9I6Z3_PSEAE Alkyl hydroperoxide reductase subunit C OS=Pseudomonas aeruginosa (strain ATCC 15692 / PAO1 / 1C / PRS 101 / LMG 12228) GN=ahpC PE=4 SV=1	1	6	6	6	45.5	45.5	45.5	20.541	187	187	0	39.485	88689000	17				300	163;419;544;1140;1225;1265	True;True;True;True;True;True	164;422;548;1151;1237;1278	294;295;745;970;971;2026;2027;2191;2192;2262;2263	580;581;582;583;584;585;586;1472;1839;1840;1841;3751;3752;4114;4115;4238;4239	585;1472;1839;3752;4115;4238
tr|Q9I748|Q9I748_PSEAE	tr|Q9I748|Q9I748_PSEAE	4	4	4	>tr|Q9I748|Q9I748_PSEAE Uncharacterized protein OS=Pseudomonas aeruginosa (strain ATCC 15692 / PAO1 / 1C / PRS 101 / LMG 12228) GN=PA0084 PE=4 SV=1	1	4	4	4	16.3	16.3	16.3	55.771	498	498	0	30.734	38006000	13				301	39;615;680;1476	True;True;True;True	39;619;685;1489	67;68;1088;1089;1208;2625	113;114;115;116;2055;2056;2057;2058;2059;2060;2271;2272;4842	116;2060;2272;4842
tr|Q9I762|Q9I762_PSEAE	tr|Q9I762|Q9I762_PSEAE	2	2	2	>tr|Q9I762|Q9I762_PSEAE Uncharacterized protein OS=Pseudomonas aeruginosa (strain ATCC 15692 / PAO1 / 1C / PRS 101 / LMG 12228) GN=PA0070 PE=4 SV=1	1	2	2	2	7.9	7.9	7.9	31.716	304	304	0	11.376	1794200	2				302	56;623	True;True	56;627	98;1103	171;2078;2079	171;2078
tr|Q9I765|Q9I765_PSEAE	tr|Q9I765|Q9I765_PSEAE	1	1	1	>tr|Q9I765|Q9I765_PSEAE Oligopeptidase A OS=Pseudomonas aeruginosa (strain ATCC 15692 / PAO1 / 1C / PRS 101 / LMG 12228) GN=prlC PE=3 SV=1	1	1	1	1	1.3	1.3	1.3	76.043	681	681	0	5.8776	798820	1				303	1491	TRUE	1504	2649	4887	4887
tr|Q9I7A7|Q9I7A7_PSEAE	tr|Q9I7A7|Q9I7A7_PSEAE	1	1	1	>tr|Q9I7A7|Q9I7A7_PSEAE Uncharacterized protein OS=Pseudomonas aeruginosa (strain ATCC 15692 / PAO1 / 1C / PRS 101 / LMG 12228) GN=PA0020 PE=4 SV=1	1	1	1	1	3.5	3.5	3.5	37.586	341	341	0.006689	5.5627	8143100	1				304	725	TRUE	731	1297	2446	2446	16	327

## Sheet: 4-1 proteinGroups  Probe 12
Protein IDs	Majority protein IDs	Peptide counts (all)	Peptide counts (razor+unique)	Peptide counts (unique)	Fasta headers	Number of proteins	Peptides	Razor + unique peptides	Unique peptides	Sequence coverage [%]	Unique + razor sequence coverage [%]	Unique sequence coverage [%]	Mol. weight [kDa]	Sequence length	Sequence lengths	Q-value	Score	Intensity	MS/MS Count	Only identified by site	Reverse	Potential contaminant	id	Peptide IDs	Peptide is razor	Mod. peptide IDs	Evidence IDs	MS/MS IDs	Best MS/MS	Oxidation (M) site IDs	Oxidation (M) site positions
CON__P00761	CON__P00761	4	4	4	>P00761 SWISS-PROT:P00761|TRYP_PIG Trypsin - Sus scrofa (Pig).	1	4	4	4	25.1	25.1	25.1	24.409	231	231	0	62.998	874930000	66			+	0	480;598;680;1038	True;True;True;True	486;604;687;1049	858;859;860;861;1090;1091;1092;1093;1094;1095;1096;1239;1240;1875	1580;1581;1582;1583;1584;1585;1586;1587;1588;1996;1997;1998;1999;2000;2001;2002;2003;2004;2005;2006;2007;2008;2009;2010;2011;2012;2013;2014;2015;2016;2017;2018;2019;2020;2021;2022;2023;2024;2025;2026;2027;2028;2029;2030;2276;2277;2278;2279;2280;2281;2282;2283;2284;3453;3454;3455;3456;3457;3458;3459;3460;3461;3462;3463;3464;3465	1584;2006;2281;3454
CON__Streptavidin	CON__Streptavidin	5	5	5	>Streptavidin (S.avidinii)	1	5	5	5	45.6	45.6	45.6	16.622	160	160	0	73.462	964900000	122			+	1	510;511;784;935;1175	True;True;True;True;True	516;517;793;945;1186	916;917;918;919;920;921;922;923;924;925;926;927;928;929;930;931;932;933;934;935;1425;1426;1427;1428;1429;1430;1674;1675;1676;1677;1678;1679;1680;1681;1682;1683;1684;1685;1686;1687;1688;1689;1690;1691;1692;2113;2114	1680;1681;1682;1683;1684;1685;1686;1687;1688;1689;1690;1691;1692;1693;1694;1695;1696;1697;1698;1699;1700;1701;1702;1703;1704;1705;1706;1707;1708;1709;1710;1711;1712;1713;1714;1715;1716;1717;1718;1719;1720;1721;1722;1723;1724;1725;1726;1727;1728;1729;1730;1731;1732;1733;1734;1735;2652;2653;2654;2655;2656;2657;2658;2659;2660;2661;2662;2663;2664;2665;2666;2667;2668;2669;2670;2671;2672;2673;2674;2675…	1683;1734;2678;3111;3865
REV__sp|Q9I383|SELD_PSEAE	REV__sp|Q9I383|SELD_PSEAE	1	1	1	>sp|Q9I383|SELD_PSEAE Selenide, water dikinase OS=Pseudomonas aeruginosa (strain ATCC 15692 / PAO1 / 1C / PRS 101 / LMG 12228) GN=selD PE=3 SV=1	1	1	1	1	0	0	0	36.353	344	344	0.004329	6.3373	2269100	2		+		2	665	TRUE	672	1216	2239;2240	2239
REV__tr|Q9HXW2|Q9HXW2_PSEAE	REV__tr|Q9HXW2|Q9HXW2_PSEAE	1	1	1	>tr|Q9HXW2|Q9HXW2_PSEAE Probable transcriptional regulator OS=Pseudomonas aeruginosa (strain ATCC 15692 / PAO1 / 1C / PRS 101 / LMG 12228) GN=PA3678 PE=4 SV=1	1	1	1	1	0	0	0	23.15	212	212	0.0080321	5.8195	125230000	11		+		3	560	TRUE	566	1025;1026	1878;1879;1880;1881;1882;1883;1884;1885;1886;1887;1888	1879
sp|G3XD12|HCNC_PSEAE	sp|G3XD12|HCNC_PSEAE	1	1	1	>sp|G3XD12|HCNC_PSEAE Hydrogen cyanide synthase subunit HcnC OS=Pseudomonas aeruginosa (strain ATCC 15692 / PAO1 / 1C / PRS 101 / LMG 12228) GN=hcnC PE=1 SV=1	1	1	1	1	4.8	4.8	4.8	45.281	417	417	0	9.3495	1455300	2				4	984	TRUE	994	1787	3313;3314	3313
sp|G3XD23|WBPB_PSEAE	sp|G3XD23|WBPB_PSEAE	5	5	5	>sp|G3XD23|WBPB_PSEAE UDP-N-acetyl-2-amino-2-deoxy-D-glucuronate oxidase OS=Pseudomonas aeruginosa (strain ATCC 15692 / PAO1 / 1C / PRS 101 / LMG 12228) GN=wbpB PE=1 SV=1	1	5	5	5	17.7	17.7	17.7	35.717	316	316	0	37.081	41014000	14				5	1;552;716;746;878	True;True;True;True;True	1;558;723;753;887	2;3;1016;1300;1301;1349;1581;1582	2;3;4;5;6;1869;2415;2416;2417;2506;2943;2944;2945;2946	2;1869;2415;2506;2945
sp|G3XD61|WBPI_PSEAE	sp|G3XD61|WBPI_PSEAE	7	7	7	>sp|G3XD61|WBPI_PSEAE UDP-2,3-diacetamido-2,3-dideoxy-D-glucuronate 2-epimerase OS=Pseudomonas aeruginosa (strain ATCC 15692 / PAO1 / 1C / PRS 101 / LMG 12228) GN=wbpI PE=1 SV=1	1	7	7	7	31.4	31.4	31.4	38.907	354	354	0	73.408	45118000	16				6	141;532;616;750;894;974;1104	True;True;True;True;True;True;True	143;538;622;757;903;984;1115	261;968;969;1128;1357;1607;1770;1771;1981;1982	500;501;502;1790;1791;1792;1793;2092;2519;2520;2984;3293;3294;3295;3641;3642	501;1791;2092;2519;2984;3293;3642
sp|G3XD67|HCNA_PSEAE	sp|G3XD67|HCNA_PSEAE	1	1	1	>sp|G3XD67|HCNA_PSEAE Hydrogen cyanide synthase subunit HcnA OS=Pseudomonas aeruginosa (strain ATCC 15692 / PAO1 / 1C / PRS 101 / LMG 12228) GN=hcnA PE=1 SV=1	1	1	1	1	29.8	29.8	29.8	11.427	104	104	0.0075758	5.5289	1595100	1				7	17	TRUE	17	34	66	66
sp|G3XD76|DAPD_PSEAE	sp|G3XD76|DAPD_PSEAE	1	1	1	>sp|G3XD76|DAPD_PSEAE 2,3,4,5-tetrahydropyridine-2,6-dicarboxylate N-succinyltransferase OS=Pseudomonas aeruginosa (strain ATCC 15692 / PAO1 / 1C / PRS 101 / LMG 12228) GN=dapD PE=1 SV=1	1	1	1	1	3.5	3.5	3.5	35.973	344	344	0.008	5.8013	6960700	2				8	366	TRUE	371	664	1235;1236	1235
sp|G3XD94|UGND_PSEAE	sp|G3XD94|UGND_PSEAE	9	9	9	>sp|G3XD94|UGND_PSEAE UDP-N-acetyl-D-glucosamine 6-dehydrogenase OS=Pseudomonas aeruginosa (strain ATCC 15692 / PAO1 / 1C / PRS 101 / LMG 12228) GN=wbpA PE=1 SV=1	1	9	9	9	27.1	27.1	27.1	48.155	436	436	0	59.927	37269000	15				9	128;151;229;272;308;359;648;743;1121	True;True;True;True;True;True;True;True;True	130;153;233;276;313;364;654;750;1132	236;237;278;279;418;502;503;565;650;1184;1344;1345;2016;2017	456;457;524;525;823;963;964;965;1075;1214;2191;2498;2499;2500;3708;3709	457;524;823;964;1075;1214;2191;2500;3709
sp|O30508|ARUC_PSEAE	sp|O30508|ARUC_PSEAE	3	3	3	>sp|O30508|ARUC_PSEAE Succinylornithine transaminase/acetylornithine aminotransferase OS=Pseudomonas aeruginosa (strain ATCC 15692 / PAO1 / 1C / PRS 101 / LMG 12228) GN=aruC PE=1 SV=2	1	3	3	3	18	18	18	43.747	406	406	0	27.466	14712000	3				10	427;908;1050	True;True;True	433;917;1061	775;1630;1631;1892	1452;3013;3014;3498	1452;3013;3498
sp|O52759|RS4_PSEAE	sp|O52759|RS4_PSEAE	5	5	5	>sp|O52759|RS4_PSEAE 30S ribosomal protein S4 OS=Pseudomonas aeruginosa (strain ATCC 15692 / PAO1 / 1C / PRS 101 / LMG 12228) GN=rpsD PE=3 SV=2	1	5	5	5	25.2	25.2	25.2	23.277	206	206	0	44.94	80973000	17				11	74;581;677;864;1046	True;True;True;True;True	76;587;684;873;1057	147;148;1060;1061;1234;1235;1559;1560;1887	292;293;294;295;296;1943;1944;1945;2264;2265;2266;2267;2268;2269;2913;2914;3492	292;1944;2265;2914;3492
sp|O52760|RPOA_PSEAE	sp|O52760|RPOA_PSEAE	7	7	7	>sp|O52760|RPOA_PSEAE DNA-directed RNA polymerase subunit alpha OS=Pseudomonas aeruginosa (strain ATCC 15692 / PAO1 / 1C / PRS 101 / LMG 12228) GN=rpoA PE=3 SV=2	1	7	7	7	23.7	23.7	23.7	36.649	333	333	0	51.97	65653000	16				12	30;76;424;671;772;918;1134	True;True;True;True;True;True;True	30;78;430;678;779;927;1145	58;59;150;769;770;1223;1224;1392;1393;1644;1645;1646;2036;2037	102;103;104;299;1443;1444;2248;2249;2572;2573;2574;3034;3035;3036;3741;3742	103;299;1444;2249;2574;3034;3742
sp|O52761|RL17_PSEAE	sp|O52761|RL17_PSEAE	2	2	2	>sp|O52761|RL17_PSEAE 50S ribosomal protein L17 OS=Pseudomonas aeruginosa (strain ATCC 15692 / PAO1 / 1C / PRS 101 / LMG 12228) GN=rplQ PE=3 SV=1	1	2	2	2	20.9	20.9	20.9	14.504	129	129	0	12.242	18049000	5				13	100;1031	True;True	102;1042	189;190;1864	365;366;367;368;3433	365;3433
sp|O52762|CATA_PSEAE	sp|O52762|CATA_PSEAE	11	11	11	>sp|O52762|CATA_PSEAE Catalase OS=Pseudomonas aeruginosa (strain ATCC 15692 / PAO1 / 1C / PRS 101 / LMG 12228) GN=katA PE=1 SV=1	1	11	11	11	33	33	33	55.588	482	482	0	112	108350000	28				14	197;329;393;395;403;588;614;688;780;790;1004	True;True;True;True;True;True;True;True;True;True;True	201;334;398;400;408;594;620;695;789;799;1015	360;361;362;605;710;711;714;715;716;717;728;729;1071;1072;1126;1255;1256;1418;1419;1439;1819	725;726;727;1145;1323;1324;1325;1326;1327;1328;1332;1333;1334;1335;1336;1337;1357;1358;1359;1958;1959;1960;1961;2090;2314;2315;2316;2317;2645;2646;2695;3369	726;1145;1326;1335;1358;1958;2090;2316;2645;2695;3369
sp|O54439|ACP1_PSEAE	sp|O54439|ACP1_PSEAE	3	3	3	>sp|O54439|ACP1_PSEAE Acyl carrier protein 1 OS=Pseudomonas aeruginosa (strain ATCC 15692 / PAO1 / 1C / PRS 101 / LMG 12228) GN=acpP1 PE=3 SV=4	1	3	3	3	35.9	35.9	35.9	8.7406	78	78	0	24.026	52299000	12				15	25;527;528	True;True;True	25;533;534	48;957;958;959;960;961;962	87;88;1772;1773;1774;1775;1776;1777;1778;1779;1780;1781	87;1772;1779
sp|O68822|AMPA_PSEAE	sp|O68822|AMPA_PSEAE	16	16	16	>sp|O68822|AMPA_PSEAE Cytosol aminopeptidase OS=Pseudomonas aeruginosa (strain ATCC 15692 / PAO1 / 1C / PRS 101 / LMG 12228) GN=pepA PE=3 SV=1	1	16	16	16	34.7	34.7	34.7	52.331	495	495	0	125.21	200210000	43				16	145;146;224;261;336;373;378;379;545;577;626;646;647;952;1067;1068	True;True;True;True;True;True;True;True;True;True;True;True;True;True;True;True	147;148;228;265;341;378;383;384;551;583;632;652;653;962;1078;1079	267;268;269;270;407;408;478;479;616;676;677;687;688;689;690;691;1004;1055;1147;1148;1179;1180;1181;1182;1183;1725;1726;1918;1919;1920	509;510;511;512;808;809;923;924;1159;1160;1256;1257;1283;1284;1285;1286;1287;1288;1289;1290;1291;1292;1293;1849;1935;2131;2132;2133;2134;2182;2183;2184;2185;2186;2187;2188;2189;2190;3199;3200;3539;3540;3541;3542	510;512;808;924;1160;1257;1284;1292;1849;1935;2131;2183;2190;3200;3540;3541
sp|O69753|PHZB1_PSEAE	sp|O69753|PHZB1_PSEAE	4	1	1	>sp|O69753|PHZB1_PSEAE Phenazine biosynthesis protein PhzB 1 OS=Pseudomonas aeruginosa (strain ATCC 15692 / PAO1 / 1C / PRS 101 / LMG 12228) GN=phzB1 PE=3 SV=1	1	4	1	1	24.1	9.9	9.9	18.888	162	162	0	11.188	6988700	3				17	95;238;825;834	False;False;False;True	97;242;834;843	181;437;438;1497;1498;1499;1509;1510	350;853;854;855;2797;2798;2799;2813;2814;2815	350;854;2797;2815
sp|O69754|PHZF_PSEAE	sp|O69754|PHZF_PSEAE	2	2	2	>sp|O69754|PHZF_PSEAE Trans-2,3-dihydro-3-hydroxyanthranilate isomerase OS=Pseudomonas aeruginosa (strain ATCC 15692 / PAO1 / 1C / PRS 101 / LMG 12228) GN=phzF1 PE=3 SV=2	1	2	2	2	13.3	13.3	13.3	30.342	278	278	0	12.23	18374000	4				18	734;739	True;True	741;746	1330;1331;1340	2476;2477;2478;2493	2478;2493
sp|O82850|RS2_PSEAE	sp|O82850|RS2_PSEAE	3	3	3	>sp|O82850|RS2_PSEAE 30S ribosomal protein S2 OS=Pseudomonas aeruginosa (strain ATCC 15692 / PAO1 / 1C / PRS 101 / LMG 12228) GN=rpsB PE=3 SV=2	1	3	3	3	19.5	19.5	19.5	27.336	246	246	0	26.764	51908000	16				19	909;985;1163	True;True;True	918;995;1174	1632;1788;1789;1790;2089;2090	3015;3016;3315;3316;3317;3318;3319;3320;3321;3322;3323;3825;3826;3827;3828;3829	3015;3316;3828
sp|O82851|EFTS_PSEAE	sp|O82851|EFTS_PSEAE	5	5	5	>sp|O82851|EFTS_PSEAE Elongation factor Ts OS=Pseudomonas aeruginosa (strain ATCC 15692 / PAO1 / 1C / PRS 101 / LMG 12228) GN=tsf PE=3 SV=1	1	5	5	5	23.9	23.9	23.9	30.653	289	289	0	35.637	44289000	13				20	24;310;437;471;685	True;True;True;True;True	24;315;443;477;692	46;47;568;569;570;787;843;844;1250;1251	85;86;1080;1081;1082;1083;1468;1556;1557;1558;1559;2308;2309	86;1083;1468;1559;2309
sp|O86428|ILVE_PSEAE	sp|O86428|ILVE_PSEAE	4	4	4	>sp|O86428|ILVE_PSEAE Branched-chain-amino-acid aminotransferase OS=Pseudomonas aeruginosa (strain ATCC 15692 / PAO1 / 1C / PRS 101 / LMG 12228) GN=ilvE PE=1 SV=2	1	4	4	4	18.2	18.2	18.2	34.084	307	307	0	26.395	22017000	6				21	156;159;166;827	True;True;True;True	159;162;169;836	288;289;293;301;1501	547;548;549;556;566;2801	548;556;566;2801
sp|O87125|CHEB1_PSEAE	sp|O87125|CHEB1_PSEAE	2	2	2	>sp|O87125|CHEB1_PSEAE Chemotaxis response regulator protein-glutamate methylesterase of group 1 operon OS=Pseudomonas aeruginosa (strain ATCC 15692 / PAO1 / 1C / PRS 101 / LMG 12228) GN=cheB1 PE=1 SV=2	1	2	2	2	11.4	11.4	11.4	39.004	368	368	0	14.037	4769600	3				22	1054;1101	True;True	1065;1112	1898;1977;1978	3507;3637;3638	3507;3638
sp|P04739|FMPO_PSEAE	sp|P04739|FMPO_PSEAE	3	3	3	>sp|P04739|FMPO_PSEAE Fimbrial protein OS=Pseudomonas aeruginosa (strain ATCC 15692 / PAO1 / 1C / PRS 101 / LMG 12228) GN=pilA PE=1 SV=1	1	3	3	3	22.1	22.1	22.1	15.512	149	149	0	20.511	19019000	6				23	883;884;936	True;True;True	892;893;946	1591;1592;1593;1693	2960;2961;2962;2963;2964;3118	2961;2963;3118
sp|P08280|RECA_PSEAE	sp|P08280|RECA_PSEAE	1	1	1	>sp|P08280|RECA_PSEAE Protein RecA OS=Pseudomonas aeruginosa (strain ATCC 15692 / PAO1 / 1C / PRS 101 / LMG 12228) GN=recA PE=3 SV=1	1	1	1	1	5.2	5.2	5.2	36.879	346	346	0	7.6586	1133300	1				24	923	TRUE	932	1653	3049	3049
sp|P08308|OTCC_PSEAE	sp|P08308|OTCC_PSEAE	11	11	11	>sp|P08308|OTCC_PSEAE Ornithine carbamoyltransferase, catabolic OS=Pseudomonas aeruginosa (strain ATCC 15692 / PAO1 / 1C / PRS 101 / LMG 12228) GN=arcB PE=1 SV=3	1	11	11	11	36	36	36	38.108	336	336	0	82.509	421310000	79				25	77;263;292;350;484;686;779;803;810;820;1195	True;True;True;True;True;True;True;True;True;True;True	79;267;296;297;355;490;693;788;812;819;829;1206	151;152;482;483;535;536;537;538;539;540;634;635;636;637;867;868;869;870;1252;1253;1416;1417;1461;1462;1471;1488;1489;2148;2149;2150	300;301;302;931;932;1014;1015;1016;1017;1018;1019;1020;1021;1022;1023;1024;1025;1026;1027;1028;1029;1030;1031;1032;1033;1034;1035;1036;1037;1038;1039;1188;1189;1190;1191;1192;1193;1194;1594;1595;1596;1597;1598;1599;1600;1601;1602;1603;1604;1605;2310;2311;2312;2639;2640;2641;2642;2643;2644;2727;2728;2729;2730;2740;2774;2775;2776;2777;2778;2779;2780;2781;3912;3913;3914;3915;3916;3917;3918	302;931;1037;1188;1603;2311;2640;2730;2740;2779;3918	0	146
sp|P09591|EFTU_PSEAE	sp|P09591|EFTU_PSEAE	27	27	27	>sp|P09591|EFTU_PSEAE Elongation factor Tu OS=Pseudomonas aeruginosa (strain ATCC 15692 / PAO1 / 1C / PRS 101 / LMG 12228) GN=tufA PE=1 SV=2	1	27	27	27	65.5	65.5	65.5	43.369	397	397	0	259.3	1784800000	308				26	18;38;42;43;63;64;123;169;170;190;191;245;372;374;394;421;633;697;698;777;807;856;857;1010;1014;1119;1120	True;True;True;True;True;True;True;True;True;True;True;True;True;True;True;True;True;True;True;True;True;True;True;True;True;True;True	18;38;42;43;64;65;66;125;172;173;193;194;195;249;377;379;399;427;639;704;705;785;786;816;865;866;1021;1025;1130;1131	35;36;72;73;81;82;83;84;85;123;124;125;126;127;128;129;130;131;228;229;306;307;308;309;342;343;344;345;346;347;348;349;350;351;451;452;675;678;679;680;681;682;683;712;713;761;762;763;764;765;1158;1268;1269;1270;1271;1405;1406;1407;1408;1409;1410;1411;1412;1413;1466;1547;1548;1549;1550;1830;1831;1838;2010;2011;2012;2013;2014;2015	67;68;69;70;132;133;134;148;149;150;151;152;153;154;155;156;157;158;159;160;161;162;163;164;165;166;167;236;237;238;239;240;241;242;243;244;245;246;247;248;249;250;251;252;253;254;255;256;257;258;259;260;261;262;263;264;265;266;267;268;269;270;271;272;273;274;441;442;443;444;587;588;589;590;591;592;593;594;656;657;658;659;660;661;662;663;664;665;666;667;668;669;670;671;672;673;674;675;676;677;678…	68;133;157;166;236;272;443;587;594;677;700;879;1255;1276;1330;1434;2149;2345;2354;2606;2735;2888;2896;3384;3399;3698;3707	1;2;3;4	177;216;362;372
sp|P11221|OPRI_PSEAE	sp|P11221|OPRI_PSEAE	6	6	6	>sp|P11221|OPRI_PSEAE Major outer membrane lipoprotein OS=Pseudomonas aeruginosa (strain ATCC 15692 / PAO1 / 1C / PRS 101 / LMG 12228) GN=oprI PE=3 SV=1	1	6	6	6	50.6	50.6	50.6	8.8348	83	83	0	64.362	103080000	41				27	11;12;537;538;683;684	True;True;True;True;True;True	11;12;543;544;690;691	22;23;24;25;26;27;979;980;981;982;983;984;1243;1244;1245;1246;1247;1248;1249	48;49;50;51;52;53;54;55;56;57;58;1806;1807;1808;1809;1810;1811;1812;1813;1814;2287;2288;2289;2290;2291;2292;2293;2294;2295;2296;2297;2298;2299;2300;2301;2302;2303;2304;2305;2306;2307	52;58;1807;1812;2292;2303
sp|P13794|PORF_PSEAE	sp|P13794|PORF_PSEAE	8	8	8	>sp|P13794|PORF_PSEAE Outer membrane porin F OS=Pseudomonas aeruginosa (strain ATCC 15692 / PAO1 / 1C / PRS 101 / LMG 12228) GN=oprF PE=1 SV=1	1	8	8	8	24.6	24.6	24.6	37.639	350	350	0	84.86	148330000	47				28	208;209;271;859;872;1040;1081;1108	True;True;True;True;True;True;True;True	212;213;275;868;881;1051;1092;1119	379;380;381;382;499;500;501;1553;1554;1572;1573;1878;1879;1944;1988;1989;1990;1991;1992	748;749;750;751;752;753;754;755;756;757;758;759;760;761;762;959;960;961;962;2904;2905;2906;2930;2931;2932;3471;3472;3473;3474;3475;3476;3477;3478;3479;3480;3481;3582;3651;3652;3653;3654;3655;3656;3657;3658;3659;3660	749;762;962;2906;2930;3477;3582;3659
sp|P13981|ARCA_PSEAE	sp|P13981|ARCA_PSEAE	29	29	29	>sp|P13981|ARCA_PSEAE Arginine deiminase OS=Pseudomonas aeruginosa (strain ATCC 15692 / PAO1 / 1C / PRS 101 / LMG 12228) GN=arcA PE=1 SV=2	1	29	29	29	54.8	54.8	54.8	46.435	418	418	0	304.36	1057500000	204				29	57;182;196;231;232;251;252;276;286;368;369;522;523;539;542;544;567;676;828;829;839;842;861;870;945;962;963;1080;1141	True;True;True;True;True;True;True;True;True;True;True;True;True;True;True;True;True;True;True;True;True;True;True;True;True;True;True;True;True	58;185;200;235;236;255;256;280;290;373;374;528;529;545;548;550;573;683;837;838;848;851;870;879;955;972;973;1091;1152	110;111;327;328;358;359;421;422;423;424;425;426;427;428;429;430;461;462;463;464;507;508;524;525;526;527;667;668;669;670;671;949;950;951;985;986;987;988;995;996;997;998;1000;1001;1002;1003;1038;1039;1231;1232;1233;1502;1503;1504;1517;1518;1522;1523;1556;1570;1710;1711;1747;1748;1749;1750;1751;1752;1753;1754;1755;1756;1943;2050;2051	214;215;216;217;625;626;627;628;629;630;631;632;633;634;635;719;720;721;722;723;724;826;827;828;829;830;831;832;833;834;835;836;837;838;839;840;841;842;843;844;845;892;893;894;895;896;897;898;899;900;969;970;971;990;991;992;993;994;995;996;997;998;999;1000;1001;1002;1003;1004;1005;1240;1241;1242;1243;1244;1245;1246;1247;1248;1249;1250;1753;1754;1755;1756;1757;1758;1759;1760;1761;1815;1816;1817;18…	215;631;723;827;844;898;900;970;1002;1246;1250;1758;1761;1818;1830;1836;1913;2263;2803;2807;2831;2843;2908;2926;3155;3240;3258;3580;3769
sp|P13982|ARCC_PSEAE	sp|P13982|ARCC_PSEAE	3	3	3	>sp|P13982|ARCC_PSEAE Carbamate kinase OS=Pseudomonas aeruginosa (strain ATCC 15692 / PAO1 / 1C / PRS 101 / LMG 12228) GN=arcC PE=3 SV=1	1	3	3	3	14.2	14.2	14.2	33.08	310	310	0	22.051	20995000	8				30	61;135;600	True;True;True	62;137;606	117;118;119;248;249;1099;1100	228;229;230;471;472;2033;2034;2035;2036	229;471;2036
sp|P14165|CISY_PSEAE	sp|P14165|CISY_PSEAE	6	6	6	>sp|P14165|CISY_PSEAE Citrate synthase OS=Pseudomonas aeruginosa (strain ATCC 15692 / PAO1 / 1C / PRS 101 / LMG 12228) GN=gltA PE=3 SV=2	1	6	6	6	18	18	18	47.694	428	428	0	42.721	48090000	16				31	66;345;420;747;767;816	True;True;True;True;True;True	68;350;426;754;774;825	134;135;627;760;1350;1351;1352;1383;1384;1480	277;278;279;1175;1413;1414;2507;2508;2509;2510;2558;2559;2560;2561;2562;2762	279;1175;1413;2510;2558;2762
sp|P15276|ALGP_PSEAE	sp|P15276|ALGP_PSEAE	1	1	1	>sp|P15276|ALGP_PSEAE Transcriptional regulatory protein AlgP OS=Pseudomonas aeruginosa (strain ATCC 15692 / PAO1 / 1C / PRS 101 / LMG 12228) GN=algP PE=4 SV=2	1	1	1	1	4	4	4	34.49	352	352	0	7.8117	2897500	1				32	210	TRUE	214	383	763	763
sp|P20582|PQSD_PSEAE	sp|P20582|PQSD_PSEAE	1	1	1	>sp|P20582|PQSD_PSEAE 2-heptyl-4(1H)-quinolone synthase PqsD OS=Pseudomonas aeruginosa (strain ATCC 15692 / PAO1 / 1C / PRS 101 / LMG 12228) GN=pqsD PE=1 SV=2	1	1	1	1	4.2	4.2	4.2	36.378	337	337	0	8.4666	3470200	1				33	392	TRUE	397	709	1322	1322
sp|P29363|THRC_PSEAE	sp|P29363|THRC_PSEAE	1	1	1	>sp|P29363|THRC_PSEAE Threonine synthase OS=Pseudomonas aeruginosa (strain ATCC 15692 / PAO1 / 1C / PRS 101 / LMG 12228) GN=thrC PE=3 SV=3	1	1	1	1	2.3	2.3	2.3	51.795	469	469	0.0074074	5.4764	5257000	1				34	690	TRUE	697	1258	2319	2319
sp|P30718|CH60_PSEAE	sp|P30718|CH60_PSEAE	31	31	31	>sp|P30718|CH60_PSEAE 60 kDa chaperonin OS=Pseudomonas aeruginosa (strain ATCC 15692 / PAO1 / 1C / PRS 101 / LMG 12228) GN=groL PE=1 SV=3	1	31	31	31	72.2	72.2	72.2	57.085	547	547	0	270.32	523680000	129				35	7;53;62;91;92;103;104;105;124;143;144;188;206;269;301;419;556;569;757;758;833;843;844;846;847;889;1028;1029;1051;1052;1143	True;True;True;True;True;True;True;True;True;True;True;True;True;True;True;True;True;True;True;True;True;True;True;True;True;True;True;True;True;True;True	7;53;54;63;93;94;105;106;107;126;145;146;191;210;273;306;425;562;575;764;765;842;852;853;855;856;898;1039;1040;1062;1063;1154	14;15;101;102;103;104;120;121;122;174;175;176;177;194;195;196;197;198;199;200;201;230;264;265;266;338;339;377;495;496;554;555;758;759;1020;1021;1041;1369;1370;1371;1508;1524;1525;1526;1528;1529;1530;1531;1532;1600;1601;1860;1861;1893;1894;1895;2054	29;30;31;32;33;34;35;36;37;38;39;40;191;192;193;194;195;196;197;198;199;200;201;202;203;204;205;206;207;231;232;233;234;235;335;336;337;338;339;340;341;342;373;374;375;376;377;378;379;380;381;382;383;384;385;386;387;388;389;390;391;392;393;394;395;396;397;398;399;400;445;506;507;508;650;651;652;746;952;953;954;955;956;1058;1059;1408;1409;1410;1411;1412;1873;1874;1916;2535;2536;2537;2538;2539;2540…	36;202;234;335;338;373;381;400;445;507;508;650;746;955;1059;1412;1873;1916;2539;2542;2811;2845;2851;2853;2861;2974;3429;3430;3501;3503;3775	5	267
sp|P37798|ACCC_PSEAE	sp|P37798|ACCC_PSEAE	7	7	7	>sp|P37798|ACCC_PSEAE Biotin carboxylase OS=Pseudomonas aeruginosa (strain ATCC 15692 / PAO1 / 1C / PRS 101 / LMG 12228) GN=accC PE=1 SV=1	1	7	7	7	24.5	24.5	24.5	48.887	449	449	0	63.717	84585000	17				36	58;893;954;1075;1079;1125;1151	True;True;True;True;True;True;True	59;902;964;1086;1090;1136;1162	112;1605;1606;1730;1731;1932;1933;1940;1941;1942;2024;2068;2069	218;2978;2979;2980;2981;2982;2983;3215;3216;3564;3565;3576;3577;3578;3724;3791;3792	218;2982;3215;3565;3576;3724;3791
sp|P37799|BCCP_PSEAE	sp|P37799|BCCP_PSEAE	7	7	7	>sp|P37799|BCCP_PSEAE Biotin carboxyl carrier protein of acetyl-CoA carboxylase OS=Pseudomonas aeruginosa (strain ATCC 15692 / PAO1 / 1C / PRS 101 / LMG 12228) GN=accB PE=3 SV=1	1	7	7	7	57.7	57.7	57.7	16.455	156	156	0	103	634220000	91				37	6;548;549;618;619;927;947	True;True;True;True;True;True;True	6;554;555;624;625;936;937;957	12;13;1007;1008;1009;1010;1011;1012;1131;1132;1133;1134;1135;1136;1137;1138;1659;1660;1661;1662;1713;1714;1715;1716;1717	18;19;20;21;22;23;24;25;26;27;28;1852;1853;1854;1855;1856;1857;1858;1859;1860;1861;1862;1863;1864;1865;2098;2099;2100;2101;2102;2103;2104;2105;2106;2107;2108;2109;2110;2111;2112;2113;2114;2115;2116;2117;2118;2119;2120;3057;3058;3059;3060;3061;3062;3063;3064;3065;3066;3067;3068;3069;3070;3071;3072;3073;3074;3075;3076;3161;3162;3163;3164;3165;3166;3167;3168;3169;3170;3171;3172;3173;3174;3175;3176;3…	19;1856;1861;2101;2120;3062;3175	6	87
sp|P38100|CARB_PSEAE	sp|P38100|CARB_PSEAE	4	4	4	>sp|P38100|CARB_PSEAE Carbamoyl-phosphate synthase large chain OS=Pseudomonas aeruginosa (strain ATCC 15692 / PAO1 / 1C / PRS 101 / LMG 12228) GN=carB PE=3 SV=3	1	4	4	4	5	5	5	117.33	1073	1073	0	24.974	5132900	5				38	67;275;660;712	True;True;True;True	69;279;667;719	136;506;1208;1209;1295	280;968;2229;2230;2407	280;968;2230;2407
sp|P43336|PHHC_PSEAE	sp|P43336|PHHC_PSEAE	3	3	3	>sp|P43336|PHHC_PSEAE Aromatic-amino-acid aminotransferase OS=Pseudomonas aeruginosa (strain ATCC 15692 / PAO1 / 1C / PRS 101 / LMG 12228) GN=phhC PE=3 SV=2	1	3	3	3	11.5	11.5	11.5	43.273	399	399	0	25.535	13611000	9				39	10;466;565	True;True;True	10;472;571	20;21;836;1034;1035	46;47;1548;1549;1903;1904;1905;1906;1907	47;1548;1903
sp|P47203|FTSA_PSEAE	sp|P47203|FTSA_PSEAE	2	2	2	>sp|P47203|FTSA_PSEAE Cell division protein FtsA OS=Pseudomonas aeruginosa (strain ATCC 15692 / PAO1 / 1C / PRS 101 / LMG 12228) GN=ftsA PE=3 SV=2	1	2	2	2	7.4	7.4	7.4	44.646	417	417	0	14.02	4525600	2				40	730;1173	True;True	737;1184	1325;2110	2469;2470;3856	2469;3856
sp|P47204|FTSZ_PSEAE	sp|P47204|FTSZ_PSEAE	4	4	4	>sp|P47204|FTSZ_PSEAE Cell division protein FtsZ OS=Pseudomonas aeruginosa (strain ATCC 15692 / PAO1 / 1C / PRS 101 / LMG 12228) GN=ftsZ PE=1 SV=2	1	4	4	4	15.2	15.2	15.2	41.218	394	394	0	28.393	10890000	5				41	382;661;1015;1140	True;True;True;True	387;668;1026;1151	694;695;1210;1839;1840;2049	1296;1297;2231;3400;3401;3761	1297;2231;3400;3761
sp|P48247|GSA_PSEAE	sp|P48247|GSA_PSEAE	4	4	4	>sp|P48247|GSA_PSEAE Glutamate-1-semialdehyde 2,1-aminomutase OS=Pseudomonas aeruginosa (strain ATCC 15692 / PAO1 / 1C / PRS 101 / LMG 12228) GN=hemL PE=1 SV=2	1	4	4	4	15.2	15.2	15.2	45.397	427	427	0	30.18	24539000	6				42	54;423;474;776	True;True;True;True	55;429;480;784	105;106;767;768;848;1403;1404	208;209;210;1441;1442;1563;2589;2590	208;1442;1563;2590
sp|P50987|ARLY_PSEAE	sp|P50987|ARLY_PSEAE	1	1	1	>sp|P50987|ARLY_PSEAE Argininosuccinate lyase OS=Pseudomonas aeruginosa (strain ATCC 15692 / PAO1 / 1C / PRS 101 / LMG 12228) GN=argH PE=3 SV=2	1	1	1	1	2.8	2.8	2.8	51.64	464	464	0	11.489	3858900	3				43	1049	TRUE	1060	1890;1891	3495;3496;3497	3495
sp|P53593|SUCC_PSEAE	sp|P53593|SUCC_PSEAE	15	15	15	>sp|P53593|SUCC_PSEAE Succinyl-CoA ligase [ADP-forming] subunit beta OS=Pseudomonas aeruginosa (strain ATCC 15692 / PAO1 / 1C / PRS 101 / LMG 12228) GN=sucC PE=3 SV=2	1	15	15	15	41.2	41.2	41.2	41.542	388	388	0	164.36	441880000	83				44	36;136;285;462;475;496;507;508;586;589;590;760;815;850;1087	True;True;True;True;True;True;True;True;True;True;True;True;True;True;True	36;138;289;468;481;502;513;514;592;595;596;767;824;859;1098	68;69;250;251;522;523;829;830;831;849;850;890;908;909;910;911;912;913;914;1068;1069;1073;1074;1075;1076;1373;1374;1478;1479;1537;1538;1954;1955;1956;1957	121;122;123;124;125;126;127;128;473;474;475;476;477;478;479;480;481;482;483;484;485;486;987;988;989;1539;1540;1541;1564;1565;1635;1636;1667;1668;1669;1670;1671;1672;1673;1674;1675;1676;1677;1678;1954;1955;1956;1962;1963;1964;1965;1966;1967;2544;2545;2752;2753;2754;2755;2756;2757;2758;2759;2760;2761;2869;2870;2871;2872;2873;2874;2875;3595;3596;3597;3598;3599;3600;3601;3602;3603;3604;3605;3606	126;479;987;1539;1565;1635;1668;1673;1954;1963;1965;2545;2753;2870;3600
sp|P53641|SODF_PSEAE	sp|P53641|SODF_PSEAE	4	4	4	>sp|P53641|SODF_PSEAE Superoxide dismutase [Fe] OS=Pseudomonas aeruginosa (strain ATCC 15692 / PAO1 / 1C / PRS 101 / LMG 12228) GN=sodB PE=3 SV=3	1	4	4	4	25.4	25.4	25.4	21.351	193	193	0	32.032	49607000	14				45	39;907;1008;1201	True;True;True;True	39;916;1019;1212	74;75;1628;1629;1826;1827;2159	135;136;137;138;139;3010;3011;3012;3377;3378;3379;3380;3937;3938	136;3012;3379;3937
sp|P57112|STHA_PSEAE	sp|P57112|STHA_PSEAE	3	3	3	>sp|P57112|STHA_PSEAE Soluble pyridine nucleotide transhydrogenase OS=Pseudomonas aeruginosa (strain ATCC 15692 / PAO1 / 1C / PRS 101 / LMG 12228) GN=sthA PE=1 SV=2	1	3	3	3	7.8	7.8	7.8	51.16	464	464	0	20.017	8990500	3				46	119;873;1026	True;True;True	121;882;1037	222;1574;1858	429;2933;3427	429;2933;3427
sp|P72173|AAT_PSEAE	sp|P72173|AAT_PSEAE	7	7	7	>sp|P72173|AAT_PSEAE Aspartate aminotransferase OS=Pseudomonas aeruginosa (strain ATCC 15692 / PAO1 / 1C / PRS 101 / LMG 12228) GN=aspC PE=3 SV=2	1	7	7	7	22.1	22.1	22.1	43.319	398	398	0	53.014	39263000	11				47	48;418;636;860;1055;1149;1202	True;True;True;True;True;True;True	48;424;642;869;1066;1160;1213	92;93;756;757;1163;1164;1555;1899;1900;2064;2065;2160;2161	175;176;1406;1407;2158;2159;2907;3508;3509;3787;3788;3939;3940	175;1406;2158;2907;3509;3787;3940
sp|P77915|HEMN_PSEAE	sp|P77915|HEMN_PSEAE	3	3	3	>sp|P77915|HEMN_PSEAE Oxygen-independent coproporphyrinogen-III oxidase OS=Pseudomonas aeruginosa (strain ATCC 15692 / PAO1 / 1C / PRS 101 / LMG 12228) GN=hemN PE=2 SV=2	1	3	3	3	10.9	10.9	10.9	52.488	460	460	0	17.469	9709600	2				48	904;1133;1200	True;True;True	913;1144;1211	1623;2035;2158	3004;3740;3936	3004;3740;3936
sp|Q51342|PUR1_PSEAE	sp|Q51342|PUR1_PSEAE	3	3	3	>sp|Q51342|PUR1_PSEAE Amidophosphoribosyltransferase OS=Pseudomonas aeruginosa (strain ATCC 15692 / PAO1 / 1C / PRS 101 / LMG 12228) GN=purF PE=3 SV=3	1	3	3	3	9.6	9.6	9.6	55.369	501	501	0	23.366	15672000	6				49	431;925;946	True;True;True	437;934;956	781;1656;1657;1712	1461;1462;3053;3054;3055;3160	1462;3054;3160
sp|Q51422|SYDND_PSEAE	sp|Q51422|SYDND_PSEAE	6	6	6	>sp|Q51422|SYDND_PSEAE Aspartate--tRNA(Asp/Asn) ligase OS=Pseudomonas aeruginosa (strain ATCC 15692 / PAO1 / 1C / PRS 101 / LMG 12228) GN=aspS PE=1 SV=2	1	6	6	6	12	12	12	66.207	591	591	0	44.495	21681000	11				50	305;309;1002;1027;1056;1057	True;True;True;True;True;True	310;314;1012;1013;1038;1067;1068	562;566;567;1815;1816;1817;1859;1901;1902	1069;1076;1077;1078;1079;3365;3366;3367;3428;3510;3511	1069;1078;3366;3428;3510;3511	7	565
sp|Q51561|RPOB_PSEAE	sp|Q51561|RPOB_PSEAE	25	25	25	>sp|Q51561|RPOB_PSEAE DNA-directed RNA polymerase subunit beta OS=Pseudomonas aeruginosa (strain ATCC 15692 / PAO1 / 1C / PRS 101 / LMG 12228) GN=rpoB PE=3 SV=2	1	25	25	25	27.3	27.3	27.3	150.84	1357	1357	0	204.51	215300000	69				51	59;84;85;89;113;214;234;340;346;361;416;531;562;674;679;720;728;761;812;858;934;940;969;1129;1174	True;True;True;True;True;True;True;True;True;True;True;True;True;True;True;True;True;True;True;True;True;True;True;True;True	60;86;87;91;115;218;238;345;351;366;422;537;568;681;686;727;735;768;821;867;944;950;979;1140;1185	113;114;162;163;164;170;214;391;392;432;621;628;654;753;966;967;1030;1031;1228;1229;1237;1238;1307;1308;1322;1323;1375;1376;1473;1551;1552;1672;1673;1700;1701;1762;1763;2030;2031;2111;2112	219;220;221;222;223;317;318;319;328;419;779;780;847;848;1168;1176;1177;1219;1403;1787;1788;1789;1895;1896;1897;1898;1899;1900;2254;2255;2256;2257;2271;2272;2273;2274;2275;2438;2439;2440;2441;2442;2465;2466;2467;2546;2547;2548;2549;2742;2900;2901;2902;2903;3090;3091;3092;3139;3140;3141;3282;3283;3284;3285;3733;3734;3735;3857;3858	219;317;319;328;419;780;847;1168;1177;1219;1403;1788;1898;2257;2274;2438;2467;2548;2742;2902;3092;3140;3284;3733;3857
sp|Q51567|SUCD_PSEAE	sp|Q51567|SUCD_PSEAE	9	9	9	>sp|Q51567|SUCD_PSEAE Succinyl-CoA ligase [ADP-forming] subunit alpha OS=Pseudomonas aeruginosa (strain ATCC 15692 / PAO1 / 1C / PRS 101 / LMG 12228) GN=sucD PE=3 SV=2	1	9	9	9	45.8	45.8	45.8	30.266	295	295	0	73.975	113480000	35				52	79;111;288;360;464;591;737;896;905	True;True;True;True;True;True;True;True;True	81;113;292;365;470;597;744;905;914	154;155;209;210;211;530;531;651;652;653;833;1077;1078;1336;1337;1338;1609;1610;1624;1625	304;305;306;307;308;408;409;410;411;412;1008;1009;1215;1216;1217;1218;1543;1544;1968;1969;1970;1971;1972;1973;1974;2487;2488;2489;2490;2986;2987;2988;3005;3006;3007	305;411;1009;1217;1544;1969;2490;2986;3005
sp|Q59636|NDK_PSEAE	sp|Q59636|NDK_PSEAE	2	2	2	>sp|Q59636|NDK_PSEAE Nucleoside diphosphate kinase OS=Pseudomonas aeruginosa (strain ATCC 15692 / PAO1 / 1C / PRS 101 / LMG 12228) GN=ndk PE=3 SV=2	1	2	2	2	14.7	14.7	14.7	15.592	143	143	0	10.756	6106900	2				53	831;986	True;True	840;996	1506;1791	2809;3324	2809;3324
sp|Q59637|ODP1_PSEAE	sp|Q59637|ODP1_PSEAE	26	26	26	>sp|Q59637|ODP1_PSEAE Pyruvate dehydrogenase E1 component OS=Pseudomonas aeruginosa (strain ATCC 15692 / PAO1 / 1C / PRS 101 / LMG 12228) GN=aceE PE=3 SV=2	1	26	26	26	36.6	36.6	36.6	99.563	882	882	0	175.74	239070000	62				54	187;193;205;215;244;249;328;391;478;517;533;643;667;710;725;764;768;791;795;863;897;922;960;1094;1152;1165	True;True;True;True;True;True;True;True;True;True;True;True;True;True;True;True;True;True;True;True;True;True;True;True;True;True	190;197;209;219;248;253;333;396;484;523;539;649;674;717;732;771;775;800;804;872;906;931;970;1105;1163;1176	337;353;375;376;393;449;450;458;459;603;604;708;855;856;943;944;970;971;1174;1175;1218;1293;1315;1316;1379;1380;1385;1440;1441;1447;1558;1611;1612;1651;1652;1744;1745;1965;1966;2070;2093;2094	648;649;709;744;745;781;782;874;875;876;877;889;890;1140;1141;1142;1143;1144;1321;1574;1575;1576;1577;1744;1745;1746;1747;1794;1795;2174;2175;2243;2405;2450;2451;2452;2552;2553;2563;2696;2697;2698;2699;2706;2912;2989;2990;3042;3043;3044;3045;3046;3047;3048;3232;3233;3619;3620;3621;3793;3832;3833	649;709;745;782;876;889;1142;1321;1577;1746;1795;2175;2243;2405;2451;2552;2563;2697;2706;2912;2989;3046;3232;3621;3793;3833
sp|Q59638|ODP2_PSEAE	sp|Q59638|ODP2_PSEAE	10	10	10	>sp|Q59638|ODP2_PSEAE Dihydrolipoyllysine-residue acetyltransferase component of pyruvate dehydrogenase complex OS=Pseudomonas aeruginosa (strain ATCC 15692 / PAO1 / 1C / PRS 101 / LMG 12228) GN=aceF PE=2 SV=2	1	10	10	10	19.4	19.4	19.4	56.708	547	547	0	67.921	85124000	29				55	19;20;237;264;304;599;652;689;916;917	True;True;True;True;True;True;True;True;True;True	19;20;241;268;309;605;659;696;925;926	37;38;39;40;435;436;484;485;560;561;1097;1098;1191;1192;1193;1257;1640;1641;1642;1643	71;72;73;74;75;76;851;852;933;934;935;936;1066;1067;1068;2031;2032;2207;2208;2209;2318;3025;3026;3027;3028;3029;3030;3031;3032;3033	71;73;851;934;1066;2032;2208;2318;3025;3029
sp|Q9HT16|ATPF_PSEAE	sp|Q9HT16|ATPF_PSEAE	4	4	4	>sp|Q9HT16|ATPF_PSEAE ATP synthase subunit b OS=Pseudomonas aeruginosa (strain ATCC 15692 / PAO1 / 1C / PRS 101 / LMG 12228) GN=atpF PE=3 SV=1	1	4	4	4	35.3	35.3	35.3	16.956	156	156	0	27.93	17404000	7				56	116;122;434;627	True;True;True;True	118;124;440;633	217;218;226;227;784;1149	422;423;438;439;440;1465;2135	422;440;1465;2135
sp|Q9HT18|ATPA_PSEAE	sp|Q9HT18|ATPA_PSEAE	13	13	13	>sp|Q9HT18|ATPA_PSEAE ATP synthase subunit alpha OS=Pseudomonas aeruginosa (strain ATCC 15692 / PAO1 / 1C / PRS 101 / LMG 12228) GN=atpA PE=3 SV=1	1	13	13	13	32.5	32.5	32.5	55.393	514	514	0	121.53	304430000	61				57	228;351;449;489;771;792;938;939;950;1037;1069;1130;1139	True;True;True;True;True;True;True;True;True;True;True;True;True	232;356;455;495;778;801;948;949;960;1048;1080;1141;1150	414;415;416;417;638;639;809;810;811;812;877;878;1390;1391;1442;1443;1696;1697;1698;1699;1721;1722;1874;1921;1922;1923;1924;2032;2045;2046;2047;2048	815;816;817;818;819;820;821;822;1195;1196;1197;1198;1517;1518;1519;1520;1613;1614;1615;1616;2569;2570;2571;2700;2701;3128;3129;3130;3131;3132;3133;3134;3135;3136;3137;3138;3191;3192;3193;3194;3452;3543;3544;3545;3546;3547;3548;3549;3550;3551;3736;3737;3750;3751;3752;3753;3754;3755;3756;3757;3758;3759;3760	818;1195;1519;1614;2570;2701;3131;3137;3191;3452;3549;3736;3759
sp|Q9HT19|ATPG_PSEAE	sp|Q9HT19|ATPG_PSEAE	2	2	2	>sp|Q9HT19|ATPG_PSEAE ATP synthase gamma chain OS=Pseudomonas aeruginosa (strain ATCC 15692 / PAO1 / 1C / PRS 101 / LMG 12228) GN=atpG PE=3 SV=1	1	2	2	2	9.8	9.8	9.8	31.553	286	286	0	15.867	8731300	5				58	789;914	True;True	798;923	1437;1438;1638	2691;2692;2693;2694;3023	2691;3023
sp|Q9HT20|ATPB_PSEAE	sp|Q9HT20|ATPB_PSEAE	15	15	15	>sp|Q9HT20|ATPB_PSEAE ATP synthase subunit beta OS=Pseudomonas aeruginosa (strain ATCC 15692 / PAO1 / 1C / PRS 101 / LMG 12228) GN=atpD PE=3 SV=1	1	15	15	15	49.3	49.3	49.3	49.499	458	458	0	141.15	173170000	50				59	184;186;207;223;413;503;766;802;848;900;1016;1035;1036;1062;1199	True;True;True;True;True;True;True;True;True;True;True;True;True;True;True	187;189;211;227;419;509;773;811;857;909;1027;1046;1047;1073;1210	330;331;334;335;336;378;406;747;748;901;902;1382;1459;1460;1533;1534;1617;1618;1619;1841;1842;1870;1871;1872;1873;1909;1910;2156;2157	637;638;639;640;641;645;646;647;747;807;1385;1386;1387;1388;1389;1390;1659;1660;1661;2555;2556;2557;2724;2725;2726;2862;2863;2864;2865;2866;2996;2997;2998;3402;3403;3445;3446;3447;3448;3449;3450;3451;3528;3529;3530;3931;3932;3933;3934;3935	641;647;747;807;1385;1659;2557;2726;2863;2996;3402;3448;3451;3528;3934
sp|Q9HT21|ATPE_PSEAE	sp|Q9HT21|ATPE_PSEAE	2	2	2	>sp|Q9HT21|ATPE_PSEAE ATP synthase epsilon chain OS=Pseudomonas aeruginosa (strain ATCC 15692 / PAO1 / 1C / PRS 101 / LMG 12228) GN=atpC PE=3 SV=1	1	2	2	2	14.9	14.9	14.9	14.726	141	141	0	15.424	1052000	3				60	331;563	True;True	336;569	607;608;1032	1147;1148;1901	1148;1901
sp|Q9HT95|ATSE4_PSEAE	sp|Q9HT95|ATSE4_PSEAE	2	2	2	>sp|Q9HT95|ATSE4_PSEAE Acetyltransferase PA5475 OS=Pseudomonas aeruginosa (strain ATCC 15692 / PAO1 / 1C / PRS 101 / LMG 12228) GN=PA5475 PE=3 SV=1	1	2	2	2	11.8	11.8	11.8	21	186	186	0	16.064	3925800	4				61	201;852	True;True	205;861	367;368;1541;1542	733;734;2879;2880	734;2880
sp|Q9HTD7|ASPA_PSEAE	sp|Q9HTD7|ASPA_PSEAE	5	5	5	>sp|Q9HTD7|ASPA_PSEAE Aspartate ammonia-lyase OS=Pseudomonas aeruginosa (strain ATCC 15692 / PAO1 / 1C / PRS 101 / LMG 12228) GN=aspA PE=3 SV=1	1	5	5	5	23.4	23.4	23.4	51.069	474	474	0	33.414	27694000	21				62	448;561;610;998;999	True;True;True;True;True	454;567;616;1008;1009	807;808;1027;1028;1029;1121;1122;1810;1811;1812	1514;1515;1516;1889;1890;1891;1892;1893;1894;2079;2080;2081;2082;2083;2084;2085;2086;3357;3358;3359;3360	1516;1892;2080;3357;3358
sp|Q9HTN8|RL28_PSEAE	sp|Q9HTN8|RL28_PSEAE	1	1	1	>sp|Q9HTN8|RL28_PSEAE 50S ribosomal protein L28 OS=Pseudomonas aeruginosa (strain ATCC 15692 / PAO1 / 1C / PRS 101 / LMG 12228) GN=rpmB PE=3 SV=1	1	1	1	1	12.8	12.8	12.8	9.0655	78	78	0	7.1412	14873000	3				63	370	TRUE	375	672;673	1251;1252;1253	1251
sp|Q9HTQ0|DADA1_PSEAE	sp|Q9HTQ0|DADA1_PSEAE	5	5	5	>sp|Q9HTQ0|DADA1_PSEAE D-amino acid dehydrogenase 1 OS=Pseudomonas aeruginosa (strain ATCC 15692 / PAO1 / 1C / PRS 101 / LMG 12228) GN=dadA1 PE=1 SV=1	1	5	5	5	16.2	16.2	16.2	47.139	432	432	0	39.041	38364000	11				64	32;898;982;996;1103	True;True;True;True;True	32;907;992;1006;1114	61;62;1613;1614;1615;1782;1783;1805;1806;1807;1980	106;107;2991;2992;2993;3306;3307;3351;3352;3353;3640	107;2992;3307;3353;3640
sp|Q9HTV1|RHO_PSEAE	sp|Q9HTV1|RHO_PSEAE	4	4	4	>sp|Q9HTV1|RHO_PSEAE Transcription termination factor Rho OS=Pseudomonas aeruginosa (strain ATCC 15692 / PAO1 / 1C / PRS 101 / LMG 12228) GN=rho PE=3 SV=1	1	4	4	4	15	15	15	47.069	419	419	0	37.235	13446000	5				65	490;729;892;973	True;True;True;True	496;736;901;983	879;880;1324;1604;1768;1769	1617;1618;1619;2468;2977;3291;3292	1619;2468;2977;3292
sp|Q9HTZ7|PCKA_PSEAE	sp|Q9HTZ7|PCKA_PSEAE	4	4	4	>sp|Q9HTZ7|PCKA_PSEAE Phosphoenolpyruvate carboxykinase [ATP] OS=Pseudomonas aeruginosa (strain ATCC 15692 / PAO1 / 1C / PRS 101 / LMG 12228) GN=pckA PE=3 SV=1	1	4	4	4	12.3	12.3	12.3	55.731	513	513	0	22.546	18570000	4				66	101;152;995;1115	True;True;True;True	103;154;1005;1126	191;280;281;1804;2005	369;526;527;3350;3679	369;526;3350;3679
sp|Q9HU21|RMLC_PSEAE	sp|Q9HU21|RMLC_PSEAE	1	1	1	>sp|Q9HU21|RMLC_PSEAE dTDP-4-dehydrorhamnose 3,5-epimerase OS=Pseudomonas aeruginosa (strain ATCC 15692 / PAO1 / 1C / PRS 101 / LMG 12228) GN=rmlC PE=1 SV=1	1	1	1	1	6.6	6.6	6.6	20.766	181	181	0	7.8158	11207000	3				67	572	TRUE	578	1045;1046	1921;1922;1923	1922
sp|Q9HU56|SECB_PSEAE	sp|Q9HU56|SECB_PSEAE	1	1	1	>sp|Q9HU56|SECB_PSEAE Protein-export protein SecB OS=Pseudomonas aeruginosa (strain ATCC 15692 / PAO1 / 1C / PRS 101 / LMG 12228) GN=secB PE=3 SV=1	1	1	1	1	5.5	5.5	5.5	18.146	163	163	0.0076336	5.5554	0	1				68	220	TRUE	224	402	797	797
sp|Q9HU65|GLNA_PSEAE	sp|Q9HU65|GLNA_PSEAE	7	7	7	>sp|Q9HU65|GLNA_PSEAE Glutamine synthetase OS=Pseudomonas aeruginosa (strain ATCC 15692 / PAO1 / 1C / PRS 101 / LMG 12228) GN=glnA PE=1 SV=1	1	7	7	7	25.6	25.6	25.6	51.944	469	469	0	59.435	60080000	29				69	90;162;180;321;705;731;877	True;True;True;True;True;True;True	92;165;183;326;712;738;886	171;172;173;296;325;588;589;590;591;1284;1285;1326;1580	329;330;331;332;333;334;559;621;622;623;1109;1110;1111;1112;1113;1114;1115;1116;1117;1118;1119;2389;2390;2391;2392;2393;2394;2471;2942	334;559;622;1112;2390;2471;2942
sp|Q9HUC0|UBIE_PSEAE	sp|Q9HUC0|UBIE_PSEAE	1	1	1	>sp|Q9HUC0|UBIE_PSEAE Ubiquinone/menaquinone biosynthesis C-methyltransferase UbiE OS=Pseudomonas aeruginosa (strain ATCC 15692 / PAO1 / 1C / PRS 101 / LMG 12228) GN=ubiE PE=3 SV=1	1	1	1	1	3.9	3.9	3.9	28.254	256	256	0.0042194	6.2136	230050	1				70	706	TRUE	713	1286	2395	2395
sp|Q9HUC8|SYR_PSEAE	sp|Q9HUC8|SYR_PSEAE	1	1	1	>sp|Q9HUC8|SYR_PSEAE Arginine--tRNA ligase OS=Pseudomonas aeruginosa (strain ATCC 15692 / PAO1 / 1C / PRS 101 / LMG 12228) GN=argS PE=3 SV=1	1	1	1	1	2	2	2	65.199	587	587	0	11.019	4333100	1				71	979	TRUE	989	1778	3302	3302
sp|Q9HUM0|HFQ_PSEAE	sp|Q9HUM0|HFQ_PSEAE	1	1	1	>sp|Q9HUM0|HFQ_PSEAE RNA-binding protein Hfq OS=Pseudomonas aeruginosa (strain ATCC 15692 / PAO1 / 1C / PRS 101 / LMG 12228) GN=hfq PE=1 SV=1	1	1	1	1	15.9	15.9	15.9	9.1034	82	82	0.0079051	5.7348	1734200	2				72	669	TRUE	676	1220;1221	2245;2246	2245
sp|Q9HUM6|PURA_PSEAE	sp|Q9HUM6|PURA_PSEAE	2	2	2	>sp|Q9HUM6|PURA_PSEAE Adenylosuccinate synthetase OS=Pseudomonas aeruginosa (strain ATCC 15692 / PAO1 / 1C / PRS 101 / LMG 12228) GN=purA PE=3 SV=1	1	2	2	2	7	7	7	46.814	430	430	0	26.87	12775000	8				73	978;1070	True;True	988;1081	1776;1777;1925;1926	3300;3301;3552;3553;3554;3555;3556;3557	3301;3555
sp|Q9HUM9|RS6_PSEAE	sp|Q9HUM9|RS6_PSEAE	2	2	2	>sp|Q9HUM9|RS6_PSEAE 30S ribosomal protein S6 OS=Pseudomonas aeruginosa (strain ATCC 15692 / PAO1 / 1C / PRS 101 / LMG 12228) GN=rpsF PE=3 SV=1	1	2	2	2	20.9	20.9	20.9	16.164	139	139	0	13.631	6346300	2				74	78;172	True;True	80;175	153;312	303;600	303;600
sp|Q9HUN0|RS18_PSEAE	sp|Q9HUN0|RS18_PSEAE	1	1	1	>sp|Q9HUN0|RS18_PSEAE 30S ribosomal protein S18 OS=Pseudomonas aeruginosa (strain ATCC 15692 / PAO1 / 1C / PRS 101 / LMG 12228) GN=rpsR PE=3 SV=1	1	1	1	1	17.1	17.1	17.1	8.8732	76	76	0.0040486	5.8697	4506200	1				75	1192	TRUE	1203	2144	3907	3907
sp|Q9HV43|DNAK_PSEAE	sp|Q9HV43|DNAK_PSEAE	8	8	8	>sp|Q9HV43|DNAK_PSEAE Chaperone protein DnaK OS=Pseudomonas aeruginosa (strain ATCC 15692 / PAO1 / 1C / PRS 101 / LMG 12228) GN=dnaK PE=3 SV=1	1	8	8	8	19.9	19.9	19.9	68.402	637	637	0	62.039	82242000	18				76	132;299;477;723;745;778;910;1012	True;True;True;True;True;True;True;True	134;304;483;730;752;787;919;1023	243;244;551;552;853;854;1311;1348;1414;1415;1633;1834;1835	465;466;467;1055;1056;1568;1569;1570;1571;1572;1573;2445;2505;2637;2638;3017;3018;3394;3395;3396	467;1056;1571;2445;2505;2637;3017;3395
sp|Q9HV50|GLMM_PSEAE	sp|Q9HV50|GLMM_PSEAE	2	2	2	>sp|Q9HV50|GLMM_PSEAE Phosphoglucosamine mutase OS=Pseudomonas aeruginosa (strain ATCC 15692 / PAO1 / 1C / PRS 101 / LMG 12228) GN=glmM PE=3 SV=1	1	2	2	2	9.2	9.2	9.2	47.796	445	445	0	13.46	8109700	4				77	670;1060	True;True	677;1071	1222;1906;1907	2247;3522;3523;3524	2247;3522
sp|Q9HV55|IF2_PSEAE	sp|Q9HV55|IF2_PSEAE	1	1	1	>sp|Q9HV55|IF2_PSEAE Translation initiation factor IF-2 OS=Pseudomonas aeruginosa (strain ATCC 15692 / PAO1 / 1C / PRS 101 / LMG 12228) GN=infB PE=3 SV=1	1	1	1	1	1.4	1.4	1.4	90.911	840	840	0	7.032	3216800	1				78	255	TRUE	259	469	908	908
sp|Q9HV59|PNP_PSEAE	sp|Q9HV59|PNP_PSEAE	7	7	7	>sp|Q9HV59|PNP_PSEAE Polyribonucleotide nucleotidyltransferase OS=Pseudomonas aeruginosa (strain ATCC 15692 / PAO1 / 1C / PRS 101 / LMG 12228) GN=pnp PE=3 SV=1	1	7	7	7	14	14	14	75.452	701	701	0	53.784	59029000	19				79	28;112;165;347;453;505;659	True;True;True;True;True;True;True	28;114;168;352;459;511;666	54;55;212;213;300;629;817;818;905;1205;1206;1207	95;96;97;413;414;415;416;417;418;565;1178;1179;1526;1527;1664;2225;2226;2227;2228	96;416;565;1179;1526;1664;2228
sp|Q9HVA2|ILVC_PSEAE	sp|Q9HVA2|ILVC_PSEAE	4	4	4	>sp|Q9HVA2|ILVC_PSEAE Ketol-acid reductoisomerase OS=Pseudomonas aeruginosa (strain ATCC 15692 / PAO1 / 1C / PRS 101 / LMG 12228) GN=ilvC PE=1 SV=1	1	4	4	4	15.1	15.1	15.1	36.424	338	338	0	28.965	23375000	8				80	358;732;882;967	True;True;True;True	363;739;891;977	648;649;1327;1590;1760	1209;1210;1211;1212;1213;2472;2959;3280	1210;2472;2959;3280
sp|Q9HVC4|RL25_PSEAE	sp|Q9HVC4|RL25_PSEAE	5	5	5	>sp|Q9HVC4|RL25_PSEAE 50S ribosomal protein L25 OS=Pseudomonas aeruginosa (strain ATCC 15692 / PAO1 / 1C / PRS 101 / LMG 12228) GN=rplY PE=3 SV=1	1	5	5	5	42.2	42.2	42.2	21.962	204	204	0	39.394	52796000	15				81	354;405;635;783;1039	True;True;True;True;True	359;411;641;792;1050	642;733;734;735;1161;1162;1424;1876;1877	1202;1363;1364;1365;1366;2154;2155;2156;2157;2651;3466;3467;3468;3469;3470	1202;1363;2157;2651;3468
sp|Q9HVC5|KPRS_PSEAE	sp|Q9HVC5|KPRS_PSEAE	3	3	3	>sp|Q9HVC5|KPRS_PSEAE Ribose-phosphate pyrophosphokinase OS=Pseudomonas aeruginosa (strain ATCC 15692 / PAO1 / 1C / PRS 101 / LMG 12228) GN=prs PE=3 SV=1	1	3	3	3	12.1	12.1	12.1	34.04	313	313	0	21.719	16356000	5				82	520;524;759	True;True;True	526;530;766	947;952;953;1372	1751;1762;1763;1764;2543	1751;1763;2543
sp|Q9HVF1|MQO2_PSEAE	sp|Q9HVF1|MQO2_PSEAE	4	4	4	>sp|Q9HVF1|MQO2_PSEAE Probable malate:quinone oxidoreductase 2 OS=Pseudomonas aeruginosa (strain ATCC 15692 / PAO1 / 1C / PRS 101 / LMG 12228) GN=mqo2 PE=3 SV=1	1	4	4	4	12.2	12.2	12.2	55.498	507	507	0	29.035	18673000	7				83	327;915;961;1194	True;True;True;True	332;924;971;1205	602;1639;1746;2146;2147	1139;3024;3234;3235;3909;3910;3911	1139;3024;3234;3910
sp|Q9HVI7|GLYA3_PSEAE;sp|Q9I138|GLYA2_PSEAE	sp|Q9HVI7|GLYA3_PSEAE	4;1	4;1	4;1	>sp|Q9HVI7|GLYA3_PSEAE Serine hydroxymethyltransferase 3 OS=Pseudomonas aeruginosa (strain ATCC 15692 / PAO1 / 1C / PRS 101 / LMG 12228) GN=glyA2 PE=3 SV=1	2	4	4	4	9.1	9.1	9.1	45.157	417	417;418	0	23.294	9612600	5				84	469;787;926;1024	True;True;True;True	475;796;935;1035	839;840;1434;1658;1855	1552;1553;2688;3056;3423	1553;2688;3056;3423
sp|Q9HVM4|SYI_PSEAE	sp|Q9HVM4|SYI_PSEAE	1	1	1	>sp|Q9HVM4|SYI_PSEAE Isoleucine--tRNA ligase OS=Pseudomonas aeruginosa (strain ATCC 15692 / PAO1 / 1C / PRS 101 / LMG 12228) GN=ileS PE=3 SV=1	1	1	1	1	2.2	2.2	2.2	105.46	943	943	0	9.5946	7297600	2				85	911	TRUE	920	1634;1635	3019;3020	3020
sp|Q9HVN5|CLPB_PSEAE	sp|Q9HVN5|CLPB_PSEAE	8	6	6	>sp|Q9HVN5|CLPB_PSEAE Chaperone protein ClpB OS=Pseudomonas aeruginosa (strain ATCC 15692 / PAO1 / 1C / PRS 101 / LMG 12228) GN=clpB PE=3 SV=1	1	8	6	6	12.5	9.8	9.8	95.004	854	854	0	47.135	18040000	15				86	22;34;356;514;515;822;949;1162	True;True;True;True;True;False;False;True	22;34;361;520;521;831;959;1173	43;65;66;644;645;939;940;941;1491;1492;1720;2087;2088	80;116;117;118;119;1204;1205;1206;1739;1740;1741;1742;2783;2784;2785;2786;2787;3189;3190;3822;3823;3824	80;118;1205;1739;1741;2785;3189;3823
sp|Q9HVT8|GATA_PSEAE	sp|Q9HVT8|GATA_PSEAE	2	2	2	>sp|Q9HVT8|GATA_PSEAE Glutamyl-tRNA(Gln) amidotransferase subunit A OS=Pseudomonas aeruginosa (strain ATCC 15692 / PAO1 / 1C / PRS 101 / LMG 12228) GN=gatA PE=1 SV=1	1	2	2	2	7.4	7.4	7.4	51.862	484	484	0	12.987	1241700	3				87	433;1113	True;True	439;1124	783;2001;2002	1464;3675;3676	1464;3675
sp|Q9HVW7|MURA_PSEAE	sp|Q9HVW7|MURA_PSEAE	1	1	1	>sp|Q9HVW7|MURA_PSEAE UDP-N-acetylglucosamine 1-carboxyvinyltransferase OS=Pseudomonas aeruginosa (strain ATCC 15692 / PAO1 / 1C / PRS 101 / LMG 12228) GN=murA PE=1 SV=1	1	1	1	1	2.4	2.4	2.4	44.645	421	421	0.0076923	5.5827	0	1				88	740	TRUE	747	1341	2494	2494
sp|Q9HVX6|SYW_PSEAE	sp|Q9HVX6|SYW_PSEAE	1	1	1	>sp|Q9HVX6|SYW_PSEAE Tryptophan--tRNA ligase OS=Pseudomonas aeruginosa (strain ATCC 15692 / PAO1 / 1C / PRS 101 / LMG 12228) GN=trpS PE=3 SV=1	1	1	1	1	2.9	2.9	2.9	48.961	448	448	0.0040323	5.8648	3116600	0				89	632	TRUE	638	1157	2148	2148
sp|Q9HW02|MURC_PSEAE	sp|Q9HW02|MURC_PSEAE	2	2	2	>sp|Q9HW02|MURC_PSEAE UDP-N-acetylmuramate--L-alanine ligase OS=Pseudomonas aeruginosa (strain ATCC 15692 / PAO1 / 1C / PRS 101 / LMG 12228) GN=murC PE=3 SV=1	1	2	2	2	5.6	5.6	5.6	51.981	480	480	0	14.646	3724700	3				90	160;655	True;True	163;662	294;1197;1198	557;2214;2215;2216	557;2214
sp|Q9HW11|Y4395_PSEAE	sp|Q9HW11|Y4395_PSEAE	1	1	1	>sp|Q9HW11|Y4395_PSEAE UPF0234 protein PA4395 OS=Pseudomonas aeruginosa (strain ATCC 15692 / PAO1 / 1C / PRS 101 / LMG 12228) GN=PA4395 PE=3 SV=1	1	1	1	1	6.9	6.9	6.9	18.044	159	159	0.0043103	6.3221	754660	1				91	1118	TRUE	1129	2009	3687	3687
sp|Q9HWC5|RL11_PSEAE	sp|Q9HWC5|RL11_PSEAE	3	3	3	>sp|Q9HWC5|RL11_PSEAE 50S ribosomal protein L11 OS=Pseudomonas aeruginosa (strain ATCC 15692 / PAO1 / 1C / PRS 101 / LMG 12228) GN=rplK PE=3 SV=1	1	3	3	3	25.2	25.2	25.2	14.907	143	143	0	29.557	24246000	5				92	838;975;997	True;True;True	847;985;1007	1515;1516;1772;1808;1809	2823;2824;3296;3354;3355;3356	2824;3296;3354
sp|Q9HWC9|RPOC_PSEAE	sp|Q9HWC9|RPOC_PSEAE	25	25	25	>sp|Q9HWC9|RPOC_PSEAE DNA-directed RNA polymerase subunit beta OS=Pseudomonas aeruginosa (strain ATCC 15692 / PAO1 / 1C / PRS 101 / LMG 12228) GN=rpoC PE=3 SV=1	1	25	25	25	23.3	23.3	23.3	154.38	1399	1399	0	203.69	269090000	77				93	14;87;189;241;265;295;296;348;386;465;476;485;551;608;617;623;634;701;722;735;751;824;942;1030;1190	True;True;True;True;True;True;True;True;True;True;True;True;True;True;True;True;True;True;True;True;True;True;True;True;True	14;89;192;245;269;300;301;353;391;471;482;491;557;614;623;629;640;708;729;742;758;833;952;1041;1201	29;167;168;340;341;443;444;486;487;544;545;546;547;630;631;700;701;834;835;851;852;871;872;1015;1118;1119;1129;1130;1143;1159;1160;1277;1278;1310;1332;1333;1358;1359;1495;1496;1704;1705;1862;1863;2140;2141	60;322;323;324;325;653;654;655;864;865;866;867;937;938;939;940;941;942;1045;1046;1047;1048;1049;1180;1181;1304;1305;1306;1307;1308;1545;1546;1547;1566;1567;1606;1607;1608;1868;2071;2072;2073;2074;2075;2076;2077;2093;2094;2095;2096;2097;2127;2150;2151;2152;2153;2379;2380;2381;2382;2444;2479;2480;2481;2482;2483;2521;2522;2792;2793;2794;2795;2796;3144;3145;3431;3432;3902;3903	60;322;654;864;938;1046;1048;1181;1304;1545;1567;1608;1868;2071;2094;2127;2151;2379;2444;2483;2522;2793;3145;3432;3903
sp|Q9HWD0|RS12_PSEAE	sp|Q9HWD0|RS12_PSEAE	1	1	1	>sp|Q9HWD0|RS12_PSEAE 30S ribosomal protein S12 OS=Pseudomonas aeruginosa (strain ATCC 15692 / PAO1 / 1C / PRS 101 / LMG 12228) GN=rpsL PE=3 SV=1	1	1	1	1	6.5	6.5	6.5	13.799	123	123	0	6.415	8237700	3				94	138	TRUE	140	253;254	488;489;490	488
sp|Q9HWD2|EFG1_PSEAE;sp|Q9I244|EFG2_PSEAE	sp|Q9HWD2|EFG1_PSEAE	21;6	21;6	21;6	>sp|Q9HWD2|EFG1_PSEAE Elongation factor G 1 OS=Pseudomonas aeruginosa (strain ATCC 15692 / PAO1 / 1C / PRS 101 / LMG 12228) GN=fusA PE=1 SV=1	2	21	21	21	44.2	44.2	44.2	77.784	706	706;702	0	187.47	340030000	85				95	33;41;75;133;142;236;280;375;384;412;414;422;442;576;607;726;801;1045;1092;1156;1170	True;True;True;True;True;True;True;True;True;True;True;True;True;True;True;True;True;True;True;True;True	33;41;77;135;144;240;284;380;389;418;420;428;448;582;613;733;810;1056;1103;1167;1181	63;64;79;80;149;245;246;262;263;434;514;515;516;684;697;698;745;746;749;750;766;794;795;1053;1054;1116;1117;1317;1318;1457;1458;1885;1886;1963;2078;2079;2103;2104	108;109;110;111;112;113;114;115;144;145;146;147;297;298;468;469;503;504;505;850;978;979;980;1280;1300;1301;1377;1378;1379;1380;1381;1382;1383;1384;1391;1392;1393;1394;1440;1477;1478;1479;1480;1481;1482;1483;1930;1931;1932;1933;1934;2064;2065;2066;2067;2068;2069;2070;2453;2454;2455;2456;2457;2458;2719;2720;2721;2722;2723;3488;3489;3490;3491;3617;3806;3807;3808;3809;3810;3811;3812;3813;3846;3847;38…	112;144;298;469;504;850;980;1280;1300;1381;1391;1440;1483;1930;2066;2455;2722;3490;3617;3806;3846
sp|Q9HWD5|RL3_PSEAE	sp|Q9HWD5|RL3_PSEAE	3	3	3	>sp|Q9HWD5|RL3_PSEAE 50S ribosomal protein L3 OS=Pseudomonas aeruginosa (strain ATCC 15692 / PAO1 / 1C / PRS 101 / LMG 12228) GN=rplC PE=3 SV=1	1	3	3	3	25.1	25.1	25.1	22.591	211	211	0	22.85	36342000	5				96	339;458;1137	True;True;True	344;464;1148	620;823;824;2043	1167;1532;1533;1534;3748	1167;1533;3748
sp|Q9HWD8|RL2_PSEAE	sp|Q9HWD8|RL2_PSEAE	6	6	6	>sp|Q9HWD8|RL2_PSEAE 50S ribosomal protein L2 OS=Pseudomonas aeruginosa (strain ATCC 15692 / PAO1 / 1C / PRS 101 / LMG 12228) GN=rplB PE=3 SV=1	1	6	6	6	28.6	28.6	28.6	29.579	273	273	0	50.712	62846000	24				97	139;401;402;404;806;874	True;True;True;True;True;True	141;406;407;409;410;815;883	255;256;257;258;724;725;726;727;730;731;732;1465;1575;1576	491;492;493;494;495;496;1347;1348;1349;1350;1351;1352;1353;1354;1355;1356;1360;1361;1362;2734;2934;2935;2936;2937	493;1351;1355;1362;2734;2934	8	225
sp|Q9HWE0|RL22_PSEAE	sp|Q9HWE0|RL22_PSEAE	1	1	1	>sp|Q9HWE0|RL22_PSEAE 50S ribosomal protein L22 OS=Pseudomonas aeruginosa (strain ATCC 15692 / PAO1 / 1C / PRS 101 / LMG 12228) GN=rplV PE=3 SV=1	1	1	1	1	11.8	11.8	11.8	11.911	110	110	0	7.9105	5911800	1				98	1059	TRUE	1070	1905	3521	3521
sp|Q9HWE1|RS3_PSEAE	sp|Q9HWE1|RS3_PSEAE	2	2	2	>sp|Q9HWE1|RS3_PSEAE 30S ribosomal protein S3 OS=Pseudomonas aeruginosa (strain ATCC 15692 / PAO1 / 1C / PRS 101 / LMG 12228) GN=rpsC PE=3 SV=1	1	2	2	2	13.2	13.2	13.2	25.838	228	228	0	13.246	3394500	3				99	444;554	True;True	450;560	798;799;1018	1486;1487;1871	1486;1871
sp|Q9HWE4|RS17_PSEAE	sp|Q9HWE4|RS17_PSEAE	1	1	1	>sp|Q9HWE4|RS17_PSEAE 30S ribosomal protein S17 OS=Pseudomonas aeruginosa (strain ATCC 15692 / PAO1 / 1C / PRS 101 / LMG 12228) GN=rpsQ PE=3 SV=1	1	1	1	1	9.1	9.1	9.1	10.086	88	88	0.0072993	5.4395	2948300	1				100	1018	TRUE	1029	1845	3408	3408
sp|Q9HWE5|RL14_PSEAE	sp|Q9HWE5|RL14_PSEAE	2	2	2	>sp|Q9HWE5|RL14_PSEAE 50S ribosomal protein L14 OS=Pseudomonas aeruginosa (strain ATCC 15692 / PAO1 / 1C / PRS 101 / LMG 12228) GN=rplN PE=3 SV=1	1	2	2	2	21.3	21.3	21.3	13.412	122	122	0	20.75	16569000	6				101	744;1171	True;True	751;1182	1346;1347;2105;2106	2501;2502;2503;2504;3850;3851	2501;3850
sp|Q9HWE8|RS14_PSEAE	sp|Q9HWE8|RS14_PSEAE	1	1	1	>sp|Q9HWE8|RS14_PSEAE 30S ribosomal protein S14 OS=Pseudomonas aeruginosa (strain ATCC 15692 / PAO1 / 1C / PRS 101 / LMG 12228) GN=rpsN PE=3 SV=1	1	1	1	1	12.9	12.9	12.9	11.565	101	101	0	9.2585	6705300	3				102	68	TRUE	70	137;138	281;282;283	281
sp|Q9HWE9|RS8_PSEAE	sp|Q9HWE9|RS8_PSEAE	4	4	4	>sp|Q9HWE9|RS8_PSEAE 30S ribosomal protein S8 OS=Pseudomonas aeruginosa (strain ATCC 15692 / PAO1 / 1C / PRS 101 / LMG 12228) GN=rpsH PE=3 SV=1	1	4	4	4	26.2	26.2	26.2	14.17	130	130	0	27.626	32365000	7				103	921;1020;1180;1181	True;True;True;True	930;1031;1191;1192	1649;1650;1848;2123;2124;2125	3039;3040;3041;3412;3880;3881;3882	3040;3412;3881;3882
sp|Q9HWF1|RL18_PSEAE	sp|Q9HWF1|RL18_PSEAE	1	1	1	>sp|Q9HWF1|RL18_PSEAE 50S ribosomal protein L18 OS=Pseudomonas aeruginosa (strain ATCC 15692 / PAO1 / 1C / PRS 101 / LMG 12228) GN=rplR PE=3 SV=1	1	1	1	1	9.5	9.5	9.5	12.661	116	116	0	7.8175	6636600	2				104	0	TRUE	0	0;1	0;1	0
sp|Q9HWF2|RS5_PSEAE	sp|Q9HWF2|RS5_PSEAE	6	6	6	>sp|Q9HWF2|RS5_PSEAE 30S ribosomal protein S5 OS=Pseudomonas aeruginosa (strain ATCC 15692 / PAO1 / 1C / PRS 101 / LMG 12228) GN=rpsE PE=3 SV=1	1	6	6	6	54.8	54.8	54.8	17.625	166	166	0	62.062	90721000	22				105	107;149;455;818;819;1155	True;True;True;True;True;True	109;151;461;827;828;1166	203;204;274;275;820;1484;1485;1486;1487;2075;2076;2077	402;403;518;519;520;521;1529;2767;2768;2769;2770;2771;2772;2773;3798;3799;3800;3801;3802;3803;3804;3805	403;520;1529;2767;2771;3800
sp|Q9HWF3|RL30_PSEAE	sp|Q9HWF3|RL30_PSEAE	1	1	1	>sp|Q9HWF3|RL30_PSEAE 50S ribosomal protein L30 OS=Pseudomonas aeruginosa (strain ATCC 15692 / PAO1 / 1C / PRS 101 / LMG 12228) GN=rpmD PE=1 SV=3	1	1	1	1	24.1	24.1	24.1	6.4775	58	58	0	6.5888	706110	2				106	506	TRUE	512	906;907	1665;1666	1665
sp|Q9HWF7|RS13_PSEAE	sp|Q9HWF7|RS13_PSEAE	1	1	1	>sp|Q9HWF7|RS13_PSEAE 30S ribosomal protein S13 OS=Pseudomonas aeruginosa (strain ATCC 15692 / PAO1 / 1C / PRS 101 / LMG 12228) GN=rpsM PE=3 SV=1	1	1	1	1	11	11	11	13.265	118	118	0	8.235	7057300	3				107	483	TRUE	489	864;865;866	1591;1592;1593	1592
sp|Q9HWF8|RS11_PSEAE	sp|Q9HWF8|RS11_PSEAE	2	2	2	>sp|Q9HWF8|RS11_PSEAE 30S ribosomal protein S11 OS=Pseudomonas aeruginosa (strain ATCC 15692 / PAO1 / 1C / PRS 101 / LMG 12228) GN=rpsK PE=3 SV=1	1	2	2	2	18.6	18.6	18.6	13.629	129	129	0	14.815	16069000	6				108	51;808	True;True	51;817	97;98;1467;1468;1469	185;186;187;2736;2737;2738	185;2738
sp|Q9HWG0|UVRA_PSEAE	sp|Q9HWG0|UVRA_PSEAE	1	1	1	>sp|Q9HWG0|UVRA_PSEAE UvrABC system protein A OS=Pseudomonas aeruginosa (strain ATCC 15692 / PAO1 / 1C / PRS 101 / LMG 12228) GN=uvrA PE=3 SV=1	1	1	1	1	1.6	1.6	1.6	104.49	945	945	0	9.1037	1086600	1				109	611	TRUE	617	1123	2087	2087
sp|Q9HWZ6|IPYR_PSEAE	sp|Q9HWZ6|IPYR_PSEAE	1	1	1	>sp|Q9HWZ6|IPYR_PSEAE Inorganic pyrophosphatase OS=Pseudomonas aeruginosa (strain ATCC 15692 / PAO1 / 1C / PRS 101 / LMG 12228) GN=ppa PE=1 SV=1	1	1	1	1	6.3	6.3	6.3	19.396	175	175	0	7.0125	1650900	2				110	1042	TRUE	1053	1881	3483;3484	3483
sp|Q9HXM6|GUAA_PSEAE	sp|Q9HXM6|GUAA_PSEAE	2	2	2	>sp|Q9HXM6|GUAA_PSEAE GMP synthase [glutamine-hydrolyzing] OS=Pseudomonas aeruginosa (strain ATCC 15692 / PAO1 / 1C / PRS 101 / LMG 12228) GN=guaA PE=3 SV=1	1	2	2	2	7.2	7.2	7.2	57.959	525	525	0	12.292	11201000	3				111	311;1098	True;True	316;1109	571;572;1972	1084;1085;3629	1085;3629
sp|Q9HXN2|PUR4_PSEAE	sp|Q9HXN2|PUR4_PSEAE	1	1	1	>sp|Q9HXN2|PUR4_PSEAE Phosphoribosylformylglycinamidine synthase OS=Pseudomonas aeruginosa (strain ATCC 15692 / PAO1 / 1C / PRS 101 / LMG 12228) GN=purL PE=3 SV=1	1	1	1	1	1.1	1.1	1.1	140.65	1298	1298	0	8.2359	1314100	2				112	1135	TRUE	1146	2038;2039	3743;3744	3744
sp|Q9HXZ2|ACCA_PSEAE	sp|Q9HXZ2|ACCA_PSEAE	1	1	1	>sp|Q9HXZ2|ACCA_PSEAE Acetyl-coenzyme A carboxylase carboxyl transferase subunit alpha OS=Pseudomonas aeruginosa (strain ATCC 15692 / PAO1 / 1C / PRS 101 / LMG 12228) GN=accA PE=1 SV=1	1	1	1	1	4.1	4.1	4.1	34.947	316	316	0	6.5411	3247200	1				113	752	TRUE	759	1360	2523	2523
sp|Q9HXZ4|PYRG_PSEAE	sp|Q9HXZ4|PYRG_PSEAE	7	7	7	>sp|Q9HXZ4|PYRG_PSEAE CTP synthase OS=Pseudomonas aeruginosa (strain ATCC 15692 / PAO1 / 1C / PRS 101 / LMG 12228) GN=pyrG PE=3 SV=1	1	7	7	7	16.1	16.1	16.1	59.617	542	542	0	55.577	28740000	11				114	364;439;521;912;955;1011;1179	True;True;True;True;True;True;True	369;445;527;921;965;1022;1190	660;661;790;948;1636;1732;1832;1833;2121;2122	1229;1230;1471;1752;3021;3217;3392;3393;3875;3876;3877;3878;3879	1230;1471;1752;3021;3217;3393;3879
sp|Q9HXZ5|ENO_PSEAE	sp|Q9HXZ5|ENO_PSEAE	2	2	2	>sp|Q9HXZ5|ENO_PSEAE Enolase OS=Pseudomonas aeruginosa (strain ATCC 15692 / PAO1 / 1C / PRS 101 / LMG 12228) GN=eno PE=3 SV=1	1	2	2	2	7.5	7.5	7.5	45.195	429	429	0	28.063	20465000	8				115	320;1122	True;True	325;1133	586;587;2018;2019	1106;1107;1108;3710;3711;3712;3713;3714	1107;3711
sp|Q9HY84|ASSY_PSEAE	sp|Q9HY84|ASSY_PSEAE	2	2	2	>sp|Q9HY84|ASSY_PSEAE Argininosuccinate synthase OS=Pseudomonas aeruginosa (strain ATCC 15692 / PAO1 / 1C / PRS 101 / LMG 12228) GN=argG PE=3 SV=1	1	2	2	2	8.6	8.6	8.6	45.297	405	405	0	13.347	7583800	2				116	110;300	True;True	112;305	208;553	407;1057	407;1057
sp|Q9HYD5|MAO1_PSEAE	sp|Q9HYD5|MAO1_PSEAE	2	2	2	>sp|Q9HYD5|MAO1_PSEAE NAD-dependent malic enzyme OS=Pseudomonas aeruginosa (strain ATCC 15692 / PAO1 / 1C / PRS 101 / LMG 12228) GN=maeA PE=3 SV=1	1	2	2	2	3.2	3.2	3.2	62.42	564	564	0	11.053	3654900	2				117	381;534	True;True	386;540	693;972	1295;1796	1295;1796
sp|Q9HZ71|RS1_PSEAE	sp|Q9HZ71|RS1_PSEAE	12	12	12	>sp|Q9HZ71|RS1_PSEAE 30S ribosomal protein S1 OS=Pseudomonas aeruginosa (strain ATCC 15692 / PAO1 / 1C / PRS 101 / LMG 12228) GN=rpsA PE=3 SV=1	1	12	12	12	29.9	29.9	29.9	61.869	559	559	0	99.022	93284000	36				118	40;221;337;338;357;555;813;832;849;851;886;943	True;True;True;True;True;True;True;True;True;True;True;True	40;225;342;343;362;561;822;841;858;860;895;953	76;77;78;403;404;617;618;619;646;647;1019;1474;1475;1507;1535;1536;1539;1540;1595;1596;1706;1707	140;141;142;143;798;799;800;801;802;803;804;1161;1162;1163;1164;1165;1166;1207;1208;1872;2743;2744;2745;2746;2747;2810;2867;2868;2876;2877;2878;2966;2967;2968;3146;3147	142;801;1162;1166;1208;1872;2746;2810;2867;2878;2968;3147
sp|Q9HZ76|WBPE_PSEAE	sp|Q9HZ76|WBPE_PSEAE	4	4	4	>sp|Q9HZ76|WBPE_PSEAE UDP-2-acetamido-2-deoxy-3-oxo-D-glucuronate aminotransferase OS=Pseudomonas aeruginosa (strain ATCC 15692 / PAO1 / 1C / PRS 101 / LMG 12228) GN=wbpE PE=1 SV=1	1	4	4	4	15.9	15.9	15.9	38.924	359	359	0	34.22	27147000	8				119	482;582;1023;1182	True;True;True;True	488;588;1034;1193	863;1062;1853;1854;2126;2127	1590;1946;3420;3421;3422;3883;3884;3885	1590;1946;3420;3885
sp|Q9HZA7|ACCD_PSEAE	sp|Q9HZA7|ACCD_PSEAE	2	2	2	>sp|Q9HZA7|ACCD_PSEAE Acetyl-coenzyme A carboxylase carboxyl transferase subunit beta OS=Pseudomonas aeruginosa (strain ATCC 15692 / PAO1 / 1C / PRS 101 / LMG 12228) GN=accD PE=1 SV=1	1	2	2	2	10.3	10.3	10.3	31.843	290	290	0	15.459	13190000	3				120	575;770	True;True	581;777	1051;1052;1388;1389	1928;1929;2567;2568	1928;2568
sp|Q9HZE0|DHE2_PSEAE	sp|Q9HZE0|DHE2_PSEAE	31	31	31	>sp|Q9HZE0|DHE2_PSEAE NAD-specific glutamate dehydrogenase OS=Pseudomonas aeruginosa (strain ATCC 15692 / PAO1 / 1C / PRS 101 / LMG 12228) GN=gdhB PE=1 SV=1	1	31	31	31	26.9	26.9	26.9	182.64	1620	1620	0	240.37	254890000	95				121	5;13;50;69;82;115;168;198;239;253;254;399;497;587;602;624;629;650;657;714;773;890;899;919;990;1063;1073;1093;1142;1177;1198	True;True;True;True;True;True;True;True;True;True;True;True;True;True;True;True;True;True;True;True;True;True;True;True;True;True;True;True;True;True;True	5;13;50;71;84;117;171;202;243;257;258;404;503;593;608;630;635;656;664;721;780;899;908;928;1000;1074;1084;1104;1153;1188;1209	10;11;28;96;139;140;158;159;216;303;304;305;363;439;440;465;466;467;468;722;891;1070;1103;1104;1144;1154;1186;1187;1201;1202;1297;1298;1394;1395;1602;1616;1647;1795;1796;1911;1912;1913;1929;1930;1964;2052;2053;2117;2118;2154;2155	14;15;16;17;59;183;184;284;285;311;312;313;421;568;569;570;571;572;573;574;575;576;577;578;579;580;581;582;583;584;585;586;728;729;856;857;901;902;903;904;905;906;907;1344;1637;1957;2039;2040;2041;2042;2043;2044;2045;2128;2145;2193;2194;2219;2220;2221;2409;2410;2411;2412;2413;2575;2576;2577;2578;2975;2994;2995;3037;3328;3329;3531;3532;3533;3534;3560;3561;3562;3618;3771;3772;3773;3774;3869;3870;38…	16;59;183;284;311;421;569;729;857;902;905;1344;1637;1957;2044;2128;2145;2194;2220;2410;2578;2975;2994;3037;3329;3534;3562;3618;3772;3871;3927
sp|Q9HZJ2|FADB_PSEAE	sp|Q9HZJ2|FADB_PSEAE	5	5	5	>sp|Q9HZJ2|FADB_PSEAE Fatty acid oxidation complex subunit alpha OS=Pseudomonas aeruginosa (strain ATCC 15692 / PAO1 / 1C / PRS 101 / LMG 12228) GN=fadB PE=3 SV=1	1	5	5	5	10.3	10.3	10.3	76.953	715	715	0	35.46	14767000	6				122	353;609;965;1007;1091	True;True;True;True;True	358;615;975;1018;1102	641;1120;1758;1824;1825;1962	1201;2078;3278;3374;3375;3376;3616	1201;2078;3278;3374;3616
sp|Q9HZJ3|FADA_PSEAE	sp|Q9HZJ3|FADA_PSEAE	1	1	1	>sp|Q9HZJ3|FADA_PSEAE 3-ketoacyl-CoA thiolase OS=Pseudomonas aeruginosa (strain ATCC 15692 / PAO1 / 1C / PRS 101 / LMG 12228) GN=fadA PE=3 SV=1	1	1	1	1	3.3	3.3	3.3	41.643	391	391	0	6.7717	5843500	1				123	117	TRUE	119	219	424	424
sp|Q9HZP6|ETFB_PSEAE	sp|Q9HZP6|ETFB_PSEAE	4	4	4	>sp|Q9HZP6|ETFB_PSEAE Electron transfer flavoprotein subunit beta OS=Pseudomonas aeruginosa (strain ATCC 15692 / PAO1 / 1C / PRS 101 / LMG 12228) GN=etfB PE=3 SV=1	1	4	4	4	22.5	22.5	22.5	26.376	249	249	0	30.018	23526000	10				124	71;246;247;1044	True;True;True;True	73;250;251;1055	142;143;453;454;455;1883;1884	287;288;880;881;882;883;884;885;3486;3487	288;880;881;3486
sp|Q9HZZ2|EFP_PSEAE	sp|Q9HZZ2|EFP_PSEAE	1	1	1	>sp|Q9HZZ2|EFP_PSEAE Elongation factor P OS=Pseudomonas aeruginosa (strain ATCC 15692 / PAO1 / 1C / PRS 101 / LMG 12228) GN=efp PE=1 SV=1	1	1	1	1	8.5	8.5	8.5	20.985	188	188	0	14.401	14228000	3				125	52	TRUE	52	99;100	188;189;190	188
sp|Q9I047|TAL_PSEAE	sp|Q9I047|TAL_PSEAE	1	1	1	>sp|Q9I047|TAL_PSEAE Transaldolase OS=Pseudomonas aeruginosa (strain ATCC 15692 / PAO1 / 1C / PRS 101 / LMG 12228) GN=tal PE=3 SV=1	1	1	1	1	4.9	4.9	4.9	33.946	307	307	0.007722	5.6015	0	1				126	211	TRUE	215	384	764	764
sp|Q9I099|SYT_PSEAE	sp|Q9I099|SYT_PSEAE	2	2	2	>sp|Q9I099|SYT_PSEAE Threonine--tRNA ligase OS=Pseudomonas aeruginosa (strain ATCC 15692 / PAO1 / 1C / PRS 101 / LMG 12228) GN=thrS PE=3 SV=1	1	2	2	2	5	5	5	73.079	640	640	0	12.275	5989900	2				127	837;888	True;True	846;897	1514;1599	2822;2971	2822;2971
sp|Q9I0A0|IF3_PSEAE	sp|Q9I0A0|IF3_PSEAE	1	1	1	>sp|Q9I0A0|IF3_PSEAE Translation initiation factor IF-3 OS=Pseudomonas aeruginosa (strain ATCC 15692 / PAO1 / 1C / PRS 101 / LMG 12228) GN=infC PE=3 SV=1	1	1	1	1	7.7	7.7	7.7	20.882	183	183	0.0076046	5.5503	1017200	1				128	121	TRUE	123	225	437	437
sp|Q9I0A2|RL20_PSEAE	sp|Q9I0A2|RL20_PSEAE	1	1	1	>sp|Q9I0A2|RL20_PSEAE 50S ribosomal protein L20 OS=Pseudomonas aeruginosa (strain ATCC 15692 / PAO1 / 1C / PRS 101 / LMG 12228) GN=rplT PE=3 SV=1	1	1	1	1	8.5	8.5	8.5	13.365	118	118	0.0073801	5.4627	2148000	0				129	1084	TRUE	1095	1949	3588	3588
sp|Q9I0J4|NUOI_PSEAE	sp|Q9I0J4|NUOI_PSEAE	1	1	1	>sp|Q9I0J4|NUOI_PSEAE NADH-quinone oxidoreductase subunit I OS=Pseudomonas aeruginosa (strain ATCC 15692 / PAO1 / 1C / PRS 101 / LMG 12228) GN=nuoI PE=3 SV=1	1	1	1	1	7.1	7.1	7.1	20.61	182	182	0	7.8527	1526100	1				130	330	TRUE	335	606	1146	1146
sp|Q9I0J5|NUOH_PSEAE	sp|Q9I0J5|NUOH_PSEAE	1	1	1	>sp|Q9I0J5|NUOH_PSEAE NADH-quinone oxidoreductase subunit H OS=Pseudomonas aeruginosa (strain ATCC 15692 / PAO1 / 1C / PRS 101 / LMG 12228) GN=nuoH PE=3 SV=1	1	1	1	1	4.5	4.5	4.5	36.743	331	331	0	7.7329	1915100	1				131	1066	TRUE	1077	1917	3538	3538
sp|Q9I0J6|NUOG_PSEAE	sp|Q9I0J6|NUOG_PSEAE	11	11	11	>sp|Q9I0J6|NUOG_PSEAE NADH-quinone oxidoreductase subunit G OS=Pseudomonas aeruginosa (strain ATCC 15692 / PAO1 / 1C / PRS 101 / LMG 12228) GN=nuoG PE=3 SV=1	1	11	11	11	20.2	20.2	20.2	98.999	905	905	0	92.738	72589000	27				132	60;86;131;302;307;344;601;622;678;871;1144	True;True;True;True;True;True;True;True;True;True;True	61;88;133;307;312;349;607;628;685;880;1155	115;116;165;166;241;242;556;557;564;626;1101;1102;1142;1236;1571;2055;2056;2057	224;225;226;227;320;321;461;462;463;464;1060;1061;1062;1063;1074;1173;1174;2037;2038;2126;2270;2927;2928;2929;3777;3778;3779	226;320;461;1063;1074;1173;2037;2126;2270;2929;3779
sp|Q9I0J7|NUOF_PSEAE	sp|Q9I0J7|NUOF_PSEAE	4	4	4	>sp|Q9I0J7|NUOF_PSEAE NADH-quinone oxidoreductase subunit F OS=Pseudomonas aeruginosa (strain ATCC 15692 / PAO1 / 1C / PRS 101 / LMG 12228) GN=nuoF PE=3 SV=1	1	4	4	4	16.5	16.5	16.5	48.678	448	448	0	26.621	9537800	5				133	154;738;987;1082	True;True;True;True	157;745;997;1093	285;1339;1792;1945	544;2491;2492;3325;3583	544;2492;3325;3583
sp|Q9I0J9|NUOCD_PSEAE	sp|Q9I0J9|NUOCD_PSEAE	5	5	5	>sp|Q9I0J9|NUOCD_PSEAE NADH-quinone oxidoreductase subunit C/D OS=Pseudomonas aeruginosa (strain ATCC 15692 / PAO1 / 1C / PRS 101 / LMG 12228) GN=nuoC PE=3 SV=1	1	5	5	5	9.4	9.4	9.4	68.322	593	593	0	34.694	23939000	7				134	192;303;620;866;972	True;True;True;True;True	196;308;626;875;982	352;558;559;1139;1562;1563;1767	708;1064;1065;2121;2916;2917;3290	708;1065;2121;2917;3290
sp|Q9I0K4|ACEA_PSEAE	sp|Q9I0K4|ACEA_PSEAE	9	9	9	>sp|Q9I0K4|ACEA_PSEAE Isocitrate lyase OS=Pseudomonas aeruginosa (strain ATCC 15692 / PAO1 / 1C / PRS 101 / LMG 12228) GN=PA2634 PE=1 SV=1	1	9	9	9	26.9	26.9	26.9	58.886	531	531	0	99.256	117530000	44				135	217;256;417;653;708;798;865;953;1136	True;True;True;True;True;True;True;True;True	221;260;423;660;715;807;874;963;1147	396;397;398;399;470;471;754;755;1194;1288;1289;1452;1453;1561;1727;1728;1729;2040;2041;2042	786;787;788;789;790;791;792;793;794;909;910;911;912;913;914;1404;1405;2210;2211;2398;2399;2400;2401;2711;2712;2713;2714;2915;3201;3202;3203;3204;3205;3206;3207;3208;3209;3210;3211;3212;3213;3214;3745;3746;3747	790;909;1404;2210;2399;2711;2915;3202;3745
sp|Q9I0K9|PUR8_PSEAE	sp|Q9I0K9|PUR8_PSEAE	2	2	2	>sp|Q9I0K9|PUR8_PSEAE Adenylosuccinate lyase OS=Pseudomonas aeruginosa (strain ATCC 15692 / PAO1 / 1C / PRS 101 / LMG 12228) GN=purB PE=3 SV=1	1	2	2	2	5.3	5.3	5.3	50.5	456	456	0	10.755	4061100	2				136	687;1186	True;True	694;1197	1254;2133	2313;3891	2313;3891
sp|Q9I1L9|DLDH1_PSEAE	sp|Q9I1L9|DLDH1_PSEAE	1	1	1	>sp|Q9I1L9|DLDH1_PSEAE Dihydrolipoyl dehydrogenase OS=Pseudomonas aeruginosa (strain ATCC 15692 / PAO1 / 1C / PRS 101 / LMG 12228) GN=lpdV PE=1 SV=1	1	1	1	1	3.4	3.4	3.4	48.588	464	464	0.007874	5.7148	2142100	1				137	875	TRUE	884	1577	2938	2938
sp|Q9I1M2|ODBA_PSEAE	sp|Q9I1M2|ODBA_PSEAE	1	1	1	>sp|Q9I1M2|ODBA_PSEAE 2-oxoisovalerate dehydrogenase subunit alpha OS=Pseudomonas aeruginosa (strain ATCC 15692 / PAO1 / 1C / PRS 101 / LMG 12228) GN=bkdA1 PE=3 SV=1	1	1	1	1	3.2	3.2	3.2	45.256	410	410	0.0041667	6.0442	1390800	1				138	809	TRUE	818	1470	2739	2739
sp|Q9I1S2|HCNB_PSEAE	sp|Q9I1S2|HCNB_PSEAE	5	5	5	>sp|Q9I1S2|HCNB_PSEAE Hydrogen cyanide synthase subunit HcnB OS=Pseudomonas aeruginosa (strain ATCC 15692 / PAO1 / 1C / PRS 101 / LMG 12228) GN=hcnB PE=1 SV=1	1	5	5	5	16.6	16.6	16.6	50.388	464	464	0	35.991	28011000	10				139	56;83;279;432;1000	True;True;True;True;True	57;85;283;438;1010	108;109;160;161;512;513;782;1813	212;213;314;315;316;975;976;977;1463;3361	213;316;975;1463;3361
sp|Q9I1Z9|Y2116_PSEAE	sp|Q9I1Z9|Y2116_PSEAE	1	1	1	>sp|Q9I1Z9|Y2116_PSEAE UPF0317 protein PA2116 OS=Pseudomonas aeruginosa (strain ATCC 15692 / PAO1 / 1C / PRS 101 / LMG 12228) GN=PA2116 PE=3 SV=1	1	1	1	1	6.4	6.4	6.4	29.221	265	265	0.0040984	5.9631	2663500	1				140	835	TRUE	844	1511	2816	2816
sp|Q9I2A8|ATOB_PSEAE	sp|Q9I2A8|ATOB_PSEAE	3	3	3	>sp|Q9I2A8|ATOB_PSEAE Acetyl-CoA acetyltransferase OS=Pseudomonas aeruginosa (strain ATCC 15692 / PAO1 / 1C / PRS 101 / LMG 12228) GN=atoB PE=3 SV=1	1	3	3	3	12.2	12.2	12.2	40.405	393	393	0	18.755	16632000	6				141	235;441;769	True;True;True	239;447;776	433;792;793;1386;1387	849;1474;1475;1476;2564;2565;2566	849;1475;2564
sp|Q9I2V5|ACNB_PSEAE	sp|Q9I2V5|ACNB_PSEAE	16	16	16	>sp|Q9I2V5|ACNB_PSEAE Aconitate hydratase B OS=Pseudomonas aeruginosa (strain ATCC 15692 / PAO1 / 1C / PRS 101 / LMG 12228) GN=acnB PE=3 SV=1	1	16	16	16	23.5	23.5	23.5	93.627	869	869	0	138.91	155680000	46				142	27;178;179;194;195;352;362;553;709;724;774;944;971;994;1124;1164	True;True;True;True;True;True;True;True;True;True;True;True;True;True;True;True	27;181;182;198;199;357;367;559;716;731;781;782;954;981;1004;1135;1175	52;53;323;324;354;355;356;357;640;655;656;657;1017;1290;1291;1292;1312;1313;1314;1396;1397;1398;1399;1400;1708;1709;1766;1803;2022;2023;2091;2092	92;93;94;618;619;620;710;711;712;713;714;715;716;717;718;1199;1200;1220;1221;1222;1870;2402;2403;2404;2446;2447;2448;2449;2579;2580;2581;2582;2583;2584;2585;3148;3149;3150;3151;3152;3153;3289;3349;3720;3721;3722;3723;3830;3831	92;619;620;716;718;1200;1221;1870;2402;2449;2583;3151;3289;3349;3720;3831	9;10	411;423
sp|Q9I383|SELD_PSEAE	sp|Q9I383|SELD_PSEAE	1	1	1	>sp|Q9I383|SELD_PSEAE Selenide, water dikinase OS=Pseudomonas aeruginosa (strain ATCC 15692 / PAO1 / 1C / PRS 101 / LMG 12228) GN=selD PE=3 SV=1	1	1	1	1	2.3	2.3	2.3	36.353	344	344	0.0042735	6.2614	0	1				143	1047	TRUE	1058	1888	3493	3493
sp|Q9I3D1|DLDH2_PSEAE	sp|Q9I3D1|DLDH2_PSEAE	15	15	15	>sp|Q9I3D1|DLDH2_PSEAE Dihydrolipoyl dehydrogenase OS=Pseudomonas aeruginosa (strain ATCC 15692 / PAO1 / 1C / PRS 101 / LMG 12228) GN=lpdG PE=3 SV=1	1	15	15	15	45.8	45.8	45.8	50.164	478	478	0	140.25	234640000	59				144	23;98;106;120;125;218;415;543;594;595;631;814;869;929;1009	True;True;True;True;True;True;True;True;True;True;True;True;True;True;True	23;100;108;122;127;222;421;549;600;601;637;823;878;939;1020	44;45;185;186;202;223;224;231;232;400;751;752;999;1082;1083;1084;1085;1086;1156;1476;1477;1567;1568;1569;1665;1666;1667;1828;1829	81;82;83;84;356;357;358;359;401;430;431;432;433;434;435;436;446;447;448;449;450;795;1395;1396;1397;1398;1399;1400;1401;1402;1835;1978;1979;1980;1981;1982;1983;1984;1985;1986;1987;1988;1989;1990;1991;1992;2147;2748;2749;2750;2751;2922;2923;2924;2925;3082;3083;3084;3085;3381;3382	82;357;401;431;446;795;1401;1835;1979;1991;2147;2748;2925;3083;3382
sp|Q9I3D2|ODO2_PSEAE	sp|Q9I3D2|ODO2_PSEAE	3	3	3	>sp|Q9I3D2|ODO2_PSEAE Dihydrolipoyllysine-residue succinyltransferase component of 2-oxoglutarate dehydrogenase complex OS=Pseudomonas aeruginosa (strain ATCC 15692 / PAO1 / 1C / PRS 101 / LMG 12228) GN=sucB PE=3 SV=1	1	3	3	3	13.4	13.4	13.4	42.887	409	409	0	21.125	19202000	7				145	604;696;781	True;True;True	610;703;790	1106;1107;1266;1267;1420;1421	2047;2048;2330;2331;2332;2333;2647;2648	2048;2332;2648
sp|Q9I3F5|ACNA_PSEAE	sp|Q9I3F5|ACNA_PSEAE	18	18	18	>sp|Q9I3F5|ACNA_PSEAE Aconitate hydratase A OS=Pseudomonas aeruginosa (strain ATCC 15692 / PAO1 / 1C / PRS 101 / LMG 12228) GN=acnA PE=3 SV=1	1	18	18	18	33.4	33.4	33.4	99.147	910	910	0	138.59	146490000	54				146	46;72;240;326;383;487;509;573;644;980;991;1022;1034;1088;1097;1100;1157;1197	True;True;True;True;True;True;True;True;True;True;True;True;True;True;True;True;True;True	46;74;244;331;388;493;515;579;650;990;1001;1033;1045;1099;1108;1111;1168;1208	89;144;145;441;442;600;601;696;874;915;1047;1048;1176;1779;1797;1798;1799;1851;1852;1868;1869;1958;1959;1970;1971;1974;1975;1976;2080;2153	172;289;290;858;859;860;861;862;863;1136;1137;1138;1298;1299;1610;1679;1924;1925;2176;2177;3303;3330;3331;3332;3333;3334;3335;3336;3337;3338;3339;3417;3418;3419;3438;3439;3440;3441;3442;3443;3444;3607;3608;3609;3610;3627;3628;3632;3633;3634;3635;3636;3814;3924;3925	172;290;858;1136;1298;1610;1679;1924;2177;3303;3332;3418;3439;3610;3628;3636;3814;3925
sp|Q9I4W0|PUR7_PSEAE	sp|Q9I4W0|PUR7_PSEAE	1	1	1	>sp|Q9I4W0|PUR7_PSEAE Phosphoribosylaminoimidazole-succinocarboxamide synthase OS=Pseudomonas aeruginosa (strain ATCC 15692 / PAO1 / 1C / PRS 101 / LMG 12228) GN=purC PE=3 SV=1	1	1	1	1	5.1	5.1	5.1	26.83	236	236	0	6.9918	6871300	3				147	583	TRUE	589	1063;1064	1947;1948;1949	1949
sp|Q9I4Z4|PAL_PSEAE	sp|Q9I4Z4|PAL_PSEAE	6	6	6	>sp|Q9I4Z4|PAL_PSEAE Peptidoglycan-associated lipoprotein OS=Pseudomonas aeruginosa (strain ATCC 15692 / PAO1 / 1C / PRS 101 / LMG 12228) GN=pal PE=3 SV=1	1	6	6	6	47	47	47	17.925	168	168	0	41.28	90397000	14				148	73;277;287;1145;1146;1196	True;True;True;True;True;True	75;281;291;1156;1157;1207	146;509;510;528;529;2058;2059;2060;2151;2152	291;972;973;1006;1007;3780;3781;3782;3783;3919;3920;3921;3922;3923	291;972;1006;3781;3782;3921
sp|Q9I502|SYP_PSEAE	sp|Q9I502|SYP_PSEAE	1	1	1	>sp|Q9I502|SYP_PSEAE Proline--tRNA ligase OS=Pseudomonas aeruginosa (strain ATCC 15692 / PAO1 / 1C / PRS 101 / LMG 12228) GN=proS PE=3 SV=1	1	1	1	1	2.3	2.3	2.3	63.103	571	571	0.0040161	5.8368	229120	1				149	1138	TRUE	1149	2044	3749	3749
sp|Q9I558|ACSA1_PSEAE	sp|Q9I558|ACSA1_PSEAE	1	1	1	>sp|Q9I558|ACSA1_PSEAE Acetyl-coenzyme A synthetase 1 OS=Pseudomonas aeruginosa (strain ATCC 15692 / PAO1 / 1C / PRS 101 / LMG 12228) GN=acsA1 PE=3 SV=1	1	1	1	1	2.9	2.9	2.9	71.762	651	651	0	8.3508	6876000	3				150	248	TRUE	252	456;457	886;887;888	888
sp|Q9I576|HPPD_PSEAE	sp|Q9I576|HPPD_PSEAE	1	1	1	>sp|Q9I576|HPPD_PSEAE 4-hydroxyphenylpyruvate dioxygenase OS=Pseudomonas aeruginosa (strain ATCC 15692 / PAO1 / 1C / PRS 101 / LMG 12228) GN=hpd PE=3 SV=1	1	1	1	1	4.2	4.2	4.2	39.912	357	357	0	14.433	2011500	2				151	788	TRUE	797	1435;1436	2689;2690	2689
sp|Q9I5A5|PTA_PSEAE	sp|Q9I5A5|PTA_PSEAE	1	1	1	>sp|Q9I5A5|PTA_PSEAE Phosphate acetyltransferase OS=Pseudomonas aeruginosa (strain ATCC 15692 / PAO1 / 1C / PRS 101 / LMG 12228) GN=pta PE=1 SV=1	1	1	1	1	1.4	1.4	1.4	75.696	704	704	0	6.6821	6584000	2				152	1077	TRUE	1088	1936;1937	3569;3570	3570
sp|Q9I5V8|RS21_PSEAE	sp|Q9I5V8|RS21_PSEAE	1	1	1	>sp|Q9I5V8|RS21_PSEAE 30S ribosomal protein S21 OS=Pseudomonas aeruginosa (strain ATCC 15692 / PAO1 / 1C / PRS 101 / LMG 12228) GN=rpsU PE=1 SV=3	1	1	1	1	16.9	16.9	16.9	8.4848	71	71	0.0075472	5.5158	188840	1				153	930	TRUE	940	1668	3086	3086
sp|Q9I5Y1|ALF_PSEAE	sp|Q9I5Y1|ALF_PSEAE	2	2	2	>sp|Q9I5Y1|ALF_PSEAE Fructose-bisphosphate aldolase OS=Pseudomonas aeruginosa (strain ATCC 15692 / PAO1 / 1C / PRS 101 / LMG 12228) GN=fba PE=3 SV=1	1	2	2	2	6.8	6.8	6.8	38.573	354	354	0	12.51	4703300	3				154	312;1176	True;True	317;1187	573;2115;2116	1086;3867;3868	1086;3868
sp|Q9I5Y4|PGK_PSEAE	sp|Q9I5Y4|PGK_PSEAE	1	1	1	>sp|Q9I5Y4|PGK_PSEAE Phosphoglycerate kinase OS=Pseudomonas aeruginosa (strain ATCC 15692 / PAO1 / 1C / PRS 101 / LMG 12228) GN=pgk PE=3 SV=1	1	1	1	1	4.4	4.4	4.4	40.404	387	387	0	8.9734	9399100	3				155	1025	TRUE	1036	1856;1857	3424;3425;3426	3425
sp|Q9I5Z0|METK_PSEAE	sp|Q9I5Z0|METK_PSEAE	5	5	5	>sp|Q9I5Z0|METK_PSEAE S-adenosylmethionine synthase OS=Pseudomonas aeruginosa (strain ATCC 15692 / PAO1 / 1C / PRS 101 / LMG 12228) GN=metK PE=3 SV=1	1	5	5	5	15.2	15.2	15.2	42.709	396	396	0	31.207	19303000	9				156	243;435;481;804;855	True;True;True;True;True	247;441;487;813;864	447;448;785;862;1463;1545;1546	872;873;1466;1589;2731;2732;2883;2884;2885;2886	873;1466;1589;2732;2885
sp|Q9I636|MASZ_PSEAE	sp|Q9I636|MASZ_PSEAE	3	3	3	>sp|Q9I636|MASZ_PSEAE Malate synthase G OS=Pseudomonas aeruginosa (strain ATCC 15692 / PAO1 / 1C / PRS 101 / LMG 12228) GN=glcB PE=3 SV=1	1	3	3	3	5.4	5.4	5.4	78.659	725	725	0	18.244	5924100	3				157	293;390;721	True;True;True	298;395;728	541;707;1309	1040;1320;2443	1040;1320;2443
sp|Q9I685|SAHH_PSEAE	sp|Q9I685|SAHH_PSEAE	14	14	14	>sp|Q9I685|SAHH_PSEAE Adenosylhomocysteinase OS=Pseudomonas aeruginosa (strain ATCC 15692 / PAO1 / 1C / PRS 101 / LMG 12228) GN=ahcY PE=3 SV=1	1	14	14	14	40.5	40.5	40.5	51.399	469	469	0	107.81	129200000	38				158	176;262;349;472;502;546;681;703;797;799;840;868;879;1169	True;True;True;True;True;True;True;True;True;True;True;True;True;True	179;266;354;478;508;552;688;710;806;808;849;877;888;1180	320;321;480;481;632;633;845;846;899;900;1005;1241;1281;1282;1450;1451;1454;1519;1566;1583;1584;2101;2102	614;615;925;926;927;928;929;930;1182;1183;1184;1185;1186;1187;1560;1561;1650;1651;1652;1653;1654;1655;1656;1657;1658;1850;2285;2385;2386;2709;2710;2715;2836;2921;2947;2948;3842;3843;3844;3845	615;926;1182;1560;1650;1850;2285;2385;2710;2715;2836;2921;2948;3842
sp|Q9I6E0|ILVD_PSEAE	sp|Q9I6E0|ILVD_PSEAE	1	1	1	>sp|Q9I6E0|ILVD_PSEAE Dihydroxy-acid dehydratase OS=Pseudomonas aeruginosa (strain ATCC 15692 / PAO1 / 1C / PRS 101 / LMG 12228) GN=ilvD PE=3 SV=1	1	1	1	1	2.1	2.1	2.1	65.159	612	612	0	7.9203	3784700	3				159	45	TRUE	45	87;88	169;170;171	170
sp|Q9I6M4|DAVT_PSEAE	sp|Q9I6M4|DAVT_PSEAE	5	5	5	>sp|Q9I6M4|DAVT_PSEAE 5-aminovalerate aminotransferase DavT OS=Pseudomonas aeruginosa (strain ATCC 15692 / PAO1 / 1C / PRS 101 / LMG 12228) GN=davT PE=1 SV=1	1	5	5	5	21.8	21.8	21.8	45.22	426	426	0	34.296	27463000	7				160	457;559;941;970;1074	True;True;True;True;True	463;565;951;980;1085	822;1024;1702;1703;1764;1765;1931	1531;1877;3142;3143;3286;3287;3288;3563	1531;1877;3142;3286;3563
sp|Q9I6M5|DAVD_PSEAE	sp|Q9I6M5|DAVD_PSEAE	6	6	6	>sp|Q9I6M5|DAVD_PSEAE Glutarate-semialdehyde dehydrogenase DavD OS=Pseudomonas aeruginosa (strain ATCC 15692 / PAO1 / 1C / PRS 101 / LMG 12228) GN=davD PE=1 SV=1	1	6	6	6	22.6	22.6	22.6	51.622	483	483	0	56.523	29540000	9				161	406;654;658;1041;1109;1148	True;True;True;True;True;True	412;661;665;1052;1120;1159	736;1195;1196;1203;1204;1880;1993;2063	1367;2212;2213;2222;2223;2224;3482;3661;3786	1367;2213;2224;3482;3661;3786
sp|Q9I742|CLPV1_PSEAE	sp|Q9I742|CLPV1_PSEAE	3	3	3	>sp|Q9I742|CLPV1_PSEAE Protein ClpV1 OS=Pseudomonas aeruginosa (strain ATCC 15692 / PAO1 / 1C / PRS 101 / LMG 12228) GN=clpV1 PE=1 SV=1	1	3	3	3	4	4	4	98.737	902	902	0	16.521	7389900	3				162	278;692;742	True;True;True	282;699;749	511;1261;1343	974;2323;2497	974;2323;2497
sp|Q9I747|HCP1_PSEAE	sp|Q9I747|HCP1_PSEAE	2	2	2	>sp|Q9I747|HCP1_PSEAE Protein hcp1 OS=Pseudomonas aeruginosa (strain ATCC 15692 / PAO1 / 1C / PRS 101 / LMG 12228) GN=hcp1 PE=1 SV=1	1	2	2	2	10.5	10.5	10.5	17.414	162	162	0	11.512	10029000	3				163	147;1111	True;True	149;1122	271;1997;1998	513;3671;3672	513;3671
sp|Q9I7C2|GYRB_PSEAE	sp|Q9I7C2|GYRB_PSEAE	1	1	1	>sp|Q9I7C2|GYRB_PSEAE DNA gyrase subunit B OS=Pseudomonas aeruginosa (strain ATCC 15692 / PAO1 / 1C / PRS 101 / LMG 12228) GN=gyrB PE=3 SV=1	1	1	1	1	1.6	1.6	1.6	90.188	806	806	0	6.6528	4948300	1				164	811	TRUE	820	1472	2741	2741
sp|Q9I7C4|DPO3B_PSEAE	sp|Q9I7C4|DPO3B_PSEAE	3	3	3	>sp|Q9I7C4|DPO3B_PSEAE DNA polymerase III subunit beta OS=Pseudomonas aeruginosa (strain ATCC 15692 / PAO1 / 1C / PRS 101 / LMG 12228) GN=dnaN PE=3 SV=1	1	3	3	3	9.8	9.8	9.8	40.694	367	367	0	18.979	4957500	4				165	222;673;693	True;True;True	226;680;700	405;1227;1262	805;806;2253;2324	805;2253;2324
sp|Q9LCT3|SECA_PSEAE	sp|Q9LCT3|SECA_PSEAE	1	1	1	>sp|Q9LCT3|SECA_PSEAE Protein translocase subunit SecA OS=Pseudomonas aeruginosa (strain ATCC 15692 / PAO1 / 1C / PRS 101 / LMG 12228) GN=secA PE=3 SV=1	1	1	1	1	1.7	1.7	1.7	103.85	916	916	0.0079365	5.769	2439600	1				166	988	TRUE	998	1793	3326	3326
sp|Q9S508|PHZB2_PSEAE	sp|Q9S508|PHZB2_PSEAE	5	5	2	>sp|Q9S508|PHZB2_PSEAE Phenazine biosynthesis protein PhzB 2 OS=Pseudomonas aeruginosa (strain ATCC 15692 / PAO1 / 1C / PRS 101 / LMG 12228) GN=phzB2 PE=1 SV=1	1	5	5	2	40.1	40.1	25.9	19.027	162	162	0	36.632	51998000	12				167	95;238;492;748;825	True;True;True;True;True	97;242;498;755;834	181;437;438;882;1353;1354;1497;1498;1499	350;853;854;855;1621;2511;2512;2513;2514;2797;2798;2799	350;854;1621;2512;2797
sp|Q9S646|PPK_PSEAE	sp|Q9S646|PPK_PSEAE	1	1	1	>sp|Q9S646|PPK_PSEAE Polyphosphate kinase OS=Pseudomonas aeruginosa (strain ATCC 15692 / PAO1 / 1C / PRS 101 / LMG 12228) GN=ppk PE=3 SV=1	1	1	1	1	1.3	1.3	1.3	78.292	690	690	0.0042373	6.2276	0	1				168	1131	TRUE	1142	2033	3738	3738
sp|Q9X2T1|THIO_PSEAE	sp|Q9X2T1|THIO_PSEAE	1	1	1	>sp|Q9X2T1|THIO_PSEAE Thioredoxin OS=Pseudomonas aeruginosa (strain ATCC 15692 / PAO1 / 1C / PRS 101 / LMG 12228) GN=trxA PE=3 SV=1	1	1	1	1	10.2	10.2	10.2	11.87	108	108	0	6.4168	4224700	2				169	741	TRUE	748	1342	2495;2496	2495
sp|Q9XCL6|SYE_PSEAE	sp|Q9XCL6|SYE_PSEAE	1	1	1	>sp|Q9XCL6|SYE_PSEAE Glutamate--tRNA ligase OS=Pseudomonas aeruginosa (strain ATCC 15692 / PAO1 / 1C / PRS 101 / LMG 12228) GN=gltX PE=3 SV=2	1	1	1	1	2.4	2.4	2.4	56.749	494	494	0.0077821	5.6475	3218100	1				170	1132	TRUE	1143	2034	3739	3739
sp|Q9ZFK4|KDSA_PSEAE	sp|Q9ZFK4|KDSA_PSEAE	1	1	1	>sp|Q9ZFK4|KDSA_PSEAE 2-dehydro-3-deoxyphosphooctonate aldolase OS=Pseudomonas aeruginosa (strain ATCC 15692 / PAO1 / 1C / PRS 101 / LMG 12228) GN=kdsA PE=1 SV=1	1	1	1	1	7.1	7.1	7.1	31.143	281	281	0	6.7019	650290	1				171	396	TRUE	401	718	1338	1338
tr|G3XCZ6|G3XCZ6_PSEAE	tr|G3XCZ6|G3XCZ6_PSEAE	1	1	1	>tr|G3XCZ6|G3XCZ6_PSEAE Malonyl CoA-acyl carrier protein transacylase OS=Pseudomonas aeruginosa (strain ATCC 15692 / PAO1 / 1C / PRS 101 / LMG 12228) GN=fabD PE=3 SV=1	1	1	1	1	6.4	6.4	6.4	32.444	312	312	0.0040816	5.9376	6193500	2				172	518	TRUE	524	945	1748;1749	1748
tr|G3XD74|G3XD74_PSEAE	tr|G3XD74|G3XD74_PSEAE	1	1	1	>tr|G3XD74|G3XD74_PSEAE D-ala-D-ala-carboxypeptidase OS=Pseudomonas aeruginosa (strain ATCC 15692 / PAO1 / 1C / PRS 101 / LMG 12228) GN=dacC PE=3 SV=1	1	1	1	1	3.9	3.9	3.9	42.457	386	386	0.0074906	5.507	4009300	1				173	460	TRUE	466	827	1537	1537
tr|Q9HT36|Q9HT36_PSEAE	tr|Q9HT36|Q9HT36_PSEAE	1	1	1	>tr|Q9HT36|Q9HT36_PSEAE N-acetylmuramoyl-L-alanine amidase OS=Pseudomonas aeruginosa (strain ATCC 15692 / PAO1 / 1C / PRS 101 / LMG 12228) GN=amiA PE=4 SV=1	1	1	1	1	2.5	2.5	2.5	42.92	397	397	0.0079681	5.8007	19289000	2				174	702	TRUE	709	1279;1280	2383;2384	2384
tr|Q9HTB5|Q9HTB5_PSEAE	tr|Q9HTB5|Q9HTB5_PSEAE	1	1	1	>tr|Q9HTB5|Q9HTB5_PSEAE Uncharacterized protein OS=Pseudomonas aeruginosa (strain ATCC 15692 / PAO1 / 1C / PRS 101 / LMG 12228) GN=PA5455 PE=4 SV=1	1	1	1	1	1.5	1.5	1.5	61.018	542	542	0.0076628	5.5725	21075000	2				175	227	TRUE	231	412;413	813;814	814
tr|Q9HTD1|Q9HTD1_PSEAE	tr|Q9HTD1|Q9HTD1_PSEAE	14	14	14	>tr|Q9HTD1|Q9HTD1_PSEAE Probable transcarboxylase subunit OS=Pseudomonas aeruginosa (strain ATCC 15692 / PAO1 / 1C / PRS 101 / LMG 12228) GN=PA5435 PE=4 SV=1	1	14	14	14	34.1	34.1	34.1	66.095	607	607	0	93.786	94507000	31				176	8;15;99;161;219;400;456;558;736;881;1127;1128;1183;1184	True;True;True;True;True;True;True;True;True;True;True;True;True;True	8;15;101;164;223;405;462;564;743;890;1138;1139;1194;1195	16;30;31;187;188;295;401;723;821;1023;1334;1335;1587;1588;1589;2026;2027;2028;2029;2128;2129;2130	41;61;62;360;361;362;363;364;558;796;1345;1346;1530;1876;2484;2485;2486;2954;2955;2956;2957;2958;3726;3727;3728;3729;3730;3731;3732;3886;3887;3888	41;62;361;558;796;1345;1530;1876;2486;2958;3726;3730;3886;3888
tr|Q9HTD8|Q9HTD8_PSEAE	tr|Q9HTD8|Q9HTD8_PSEAE	2	2	2	>tr|Q9HTD8|Q9HTD8_PSEAE Probable transcriptional regulator OS=Pseudomonas aeruginosa (strain ATCC 15692 / PAO1 / 1C / PRS 101 / LMG 12228) GN=PA5428 PE=4 SV=1	1	2	2	2	14.9	14.9	14.9	33.477	302	302	0	10.735	12304000	2				177	410;958	True;True	416;968	742;743;1741	1374;1375;3228;3229	1374;3228
tr|Q9HTD9|Q9HTD9_PSEAE	tr|Q9HTD9|Q9HTD9_PSEAE	11	11	11	>tr|Q9HTD9|Q9HTD9_PSEAE Alcohol dehydrogenase OS=Pseudomonas aeruginosa (strain ATCC 15692 / PAO1 / 1C / PRS 101 / LMG 12228) GN=adhA PE=1 SV=1	1	11	11	11	50.6	50.6	50.6	35.911	342	342	0	78.505	118580000	32				178	9;16;102;137;185;447;547;836;841;862;1114	True;True;True;True;True;True;True;True;True;True;True	9;16;104;139;188;453;553;845;850;871;1125	17;18;19;32;33;192;193;252;332;333;805;806;1006;1512;1513;1520;1521;1557;2003;2004	42;43;44;45;63;64;65;370;371;372;487;642;643;644;1509;1510;1511;1512;1513;1851;2817;2818;2819;2820;2821;2837;2838;2839;2840;2841;2910;2911;3677;3678	45;63;370;487;642;1511;1851;2819;2841;2910;3677
tr|Q9HTP2|Q9HTP2_PSEAE	tr|Q9HTP2|Q9HTP2_PSEAE	2	2	2	>tr|Q9HTP2|Q9HTP2_PSEAE Probable aldehyde dehydrogenase OS=Pseudomonas aeruginosa (strain ATCC 15692 / PAO1 / 1C / PRS 101 / LMG 12228) GN=PA5312 PE=3 SV=1	1	2	2	2	10.5	10.5	10.5	53.143	497	497	0	12.795	4759400	3				179	290;440	True;True	294;446	533;791	1012;1472;1473	1012;1473
tr|Q9HTU9|Q9HTU9_PSEAE	tr|Q9HTU9|Q9HTU9_PSEAE	2	2	2	>tr|Q9HTU9|Q9HTU9_PSEAE Uncharacterized protein OS=Pseudomonas aeruginosa (strain ATCC 15692 / PAO1 / 1C / PRS 101 / LMG 12228) GN=PA5245 PE=4 SV=1	1	2	2	2	21.2	21.2	21.2	23.425	222	222	0	11.948	7183300	3				180	226;550	True;True	230;556	411;1013;1014	812;1866;1867	812;1867
tr|Q9HU24|Q9HU24_PSEAE	tr|Q9HU24|Q9HU24_PSEAE	2	2	2	>tr|Q9HU24|Q9HU24_PSEAE dTDP-glucose 4,6-dehydratase OS=Pseudomonas aeruginosa (strain ATCC 15692 / PAO1 / 1C / PRS 101 / LMG 12228) GN=rmlB PE=3 SV=1	1	2	2	2	6.8	6.8	6.8	39.542	352	352	0	11.042	3025900	2				181	70;1178	True;True	72;1189	141;2119;2120	286;3873;3874	286;3874
tr|Q9HUD3|Q9HUD3_PSEAE	tr|Q9HUD3|Q9HUD3_PSEAE	3	3	3	>tr|Q9HUD3|Q9HUD3_PSEAE Malic enzyme OS=Pseudomonas aeruginosa (strain ATCC 15692 / PAO1 / 1C / PRS 101 / LMG 12228) GN=PA5046 PE=4 SV=1	1	3	3	3	10.2	10.2	10.2	45.428	422	422	0	28.889	21949000	9				182	3;625;880	True;True;True	3;631;889	6;7;1145;1146;1585;1586	9;10;2129;2130;2949;2950;2951;2952;2953	10;2129;2949
tr|Q9HUG0|Q9HUG0_PSEAE	tr|Q9HUG0|Q9HUG0_PSEAE	1	1	1	>tr|Q9HUG0|Q9HUG0_PSEAE Probable carbamoyl transferase OS=Pseudomonas aeruginosa (strain ATCC 15692 / PAO1 / 1C / PRS 101 / LMG 12228) GN=PA5005 PE=4 SV=1	1	1	1	1	4.3	4.3	4.3	66.079	585	585	0.0041152	6.0024	10141000	3				183	258	TRUE	262	473;474	916;917;918	917
tr|Q9HUZ3|Q9HUZ3_PSEAE	tr|Q9HUZ3|Q9HUZ3_PSEAE	1	1	1	>tr|Q9HUZ3|Q9HUZ3_PSEAE Uncharacterized protein OS=Pseudomonas aeruginosa (strain ATCC 15692 / PAO1 / 1C / PRS 101 / LMG 12228) GN=PA4817 PE=4 SV=1	1	1	1	1	7.3	7.3	7.3	18.796	164	164	0.0074349	5.4947	6960700	1				184	1005	TRUE	1016	1820	3370	3370
tr|Q9HV54|Q9HV54_PSEAE	tr|Q9HV54|Q9HV54_PSEAE	3	3	3	>tr|Q9HV54|Q9HV54_PSEAE Transcription termination/antitermination protein NusA OS=Pseudomonas aeruginosa (strain ATCC 15692 / PAO1 / 1C / PRS 101 / LMG 12228) GN=nusA PE=3 SV=1	1	3	3	3	12.2	12.2	12.2	54.658	493	493	0	28.534	4989200	3				185	200;411;454	True;True;True	204;417;460	366;744;819	732;1376;1528	732;1376;1528
tr|Q9HV96|Q9HV96_PSEAE	tr|Q9HV96|Q9HV96_PSEAE	3	3	3	>tr|Q9HV96|Q9HV96_PSEAE Uncharacterized protein OS=Pseudomonas aeruginosa (strain ATCC 15692 / PAO1 / 1C / PRS 101 / LMG 12228) GN=PA4701 PE=4 SV=1	1	3	3	3	7.3	7.3	7.3	58.376	520	520	0	20.657	17266000	4				186	461;498;695	True;True;True	467;504;702	828;892;893;1265	1538;1638;1639;2329	1538;1639;2329
tr|Q9HVD5|Q9HVD5_PSEAE	tr|Q9HVD5|Q9HVD5_PSEAE	1	1	1	>tr|Q9HVD5|Q9HVD5_PSEAE Uncharacterized protein OS=Pseudomonas aeruginosa (strain ATCC 15692 / PAO1 / 1C / PRS 101 / LMG 12228) GN=PA4657 PE=4 SV=1	1	1	1	1	4	4	4	35.913	327	327	0	6.4335	304470	1				187	181	TRUE	184	326	624	624
tr|Q9HVF9|Q9HVF9_PSEAE	tr|Q9HVF9|Q9HVF9_PSEAE	1	1	1	>tr|Q9HVF9|Q9HVF9_PSEAE Uncharacterized protein OS=Pseudomonas aeruginosa (strain ATCC 15692 / PAO1 / 1C / PRS 101 / LMG 12228) GN=PA4632 PE=3 SV=1	1	1	1	1	7.3	7.3	7.3	29.159	273	273	0.0042918	6.2633	753980	2				188	129	TRUE	131	238;239	458;459	459
tr|Q9HVJ1|Q9HVJ1_PSEAE	tr|Q9HVJ1|Q9HVJ1_PSEAE	5	5	5	>tr|Q9HVJ1|Q9HVJ1_PSEAE Probable ATP-binding component of ABC transporter OS=Pseudomonas aeruginosa (strain ATCC 15692 / PAO1 / 1C / PRS 101 / LMG 12228) GN=PA4595 PE=4 SV=1	1	5	5	5	10.3	10.3	10.3	61.32	554	554	0	39.41	30274000	8				189	298;467;470;887;1095	True;True;True;True;True	303;473;476;896;1106	550;837;841;842;1597;1598;1967;1968	1054;1550;1554;1555;2969;2970;3622;3623	1054;1550;1555;2969;3622
tr|Q9HVM0|Q9HVM0_PSEAE	tr|Q9HVM0|Q9HVM0_PSEAE	1	1	1	>tr|Q9HVM0|Q9HVM0_PSEAE Uncharacterized protein OS=Pseudomonas aeruginosa (strain ATCC 15692 / PAO1 / 1C / PRS 101 / LMG 12228) GN=PA4564 PE=4 SV=1	1	1	1	1	9.1	9.1	9.1	16.724	154	154	0.0078125	5.682	7808300	1				190	854	TRUE	863	1544	2882	2882	11	111
tr|Q9HVS8|Q9HVS8_PSEAE	tr|Q9HVS8|Q9HVS8_PSEAE	1	1	1	>tr|Q9HVS8|Q9HVS8_PSEAE RoxR OS=Pseudomonas aeruginosa (strain ATCC 15692 / PAO1 / 1C / PRS 101 / LMG 12228) GN=roxR PE=4 SV=1	1	1	1	1	7.5	7.5	7.5	20.616	186	186	0	6.5292	1058600	2				191	1085	TRUE	1096	1950;1951	3589;3590	3590
tr|Q9HVU0|Q9HVU0_PSEAE	tr|Q9HVU0|Q9HVU0_PSEAE	2	2	2	>tr|Q9HVU0|Q9HVU0_PSEAE Rod shape-determining protein MreB OS=Pseudomonas aeruginosa (strain ATCC 15692 / PAO1 / 1C / PRS 101 / LMG 12228) GN=mreB PE=4 SV=1	1	2	2	2	11	11	11	36.976	345	345	0	11.199	3105400	1				192	377;891	True;True	382;900	686;1603	1282;2976	1282;2976
tr|Q9HVY4|Q9HVY4_PSEAE	tr|Q9HVY4|Q9HVY4_PSEAE	1	1	1	>tr|Q9HVY4|Q9HVY4_PSEAE Ubiquinol-cytochrome c reductase iron-sulfur subunit OS=Pseudomonas aeruginosa (strain ATCC 15692 / PAO1 / 1C / PRS 101 / LMG 12228) GN=PA4431 PE=4 SV=1	1	1	1	1	5.6	5.6	5.6	20.828	197	197	0	7.0125	749780	2				193	126	TRUE	128	233;234	451;452	451
tr|Q9HVY5|Q9HVY5_PSEAE	tr|Q9HVY5|Q9HVY5_PSEAE	2	2	2	>tr|Q9HVY5|Q9HVY5_PSEAE Cytochrome b OS=Pseudomonas aeruginosa (strain ATCC 15692 / PAO1 / 1C / PRS 101 / LMG 12228) GN=PA4430 PE=3 SV=1	1	2	2	2	6.7	6.7	6.7	46.072	403	403	0	16.693	6427900	5				194	318;992	True;True	323;1002	582;583;1800	1101;1102;3340;3341;3342	1101;3342
tr|Q9HVY6|Q9HVY6_PSEAE	tr|Q9HVY6|Q9HVY6_PSEAE	2	2	2	>tr|Q9HVY6|Q9HVY6_PSEAE Probable cytochrome c1 OS=Pseudomonas aeruginosa (strain ATCC 15692 / PAO1 / 1C / PRS 101 / LMG 12228) GN=PA4429 PE=4 SV=1	1	2	2	2	10.4	10.4	10.4	28.993	260	260	0	13.7	11527000	5				195	964;1021	True;True	974;1032	1757;1849;1850	3277;3413;3414;3415;3416	3277;3416
tr|Q9HW15|Q9HW15_PSEAE	tr|Q9HW15|Q9HW15_PSEAE	2	2	2	>tr|Q9HW15|Q9HW15_PSEAE Probable short-chain dehydrogenase OS=Pseudomonas aeruginosa (strain ATCC 15692 / PAO1 / 1C / PRS 101 / LMG 12228) GN=speA PE=4 SV=1	1	2	2	2	12.7	12.7	12.7	26.72	252	252	0	11.206	14226000	4				196	574;1033	True;True	580;1044	1049;1050;1867	1926;1927;3436;3437	1927;3437
tr|Q9HW49|Q9HW49_PSEAE	tr|Q9HW49|Q9HW49_PSEAE	6	6	6	>tr|Q9HW49|Q9HW49_PSEAE Uncharacterized protein OS=Pseudomonas aeruginosa (strain ATCC 15692 / PAO1 / 1C / PRS 101 / LMG 12228) GN=PA4352 PE=3 SV=1	1	6	6	6	36.4	36.4	36.4	30.972	286	286	0	43.116	45578000	33				197	153;500;570;1043;1058;1096	True;True;True;True;True;True	155;156;506;576;1054;1069;1107	282;283;284;895;896;1042;1882;1903;1904;1969	528;529;530;531;532;533;534;535;536;537;538;539;540;541;542;543;1641;1642;1917;1918;3485;3512;3513;3514;3515;3516;3517;3518;3519;3520;3624;3625;3626	529;1641;1917;3485;3513;3625	12	158
tr|Q9HW68|Q9HW68_PSEAE	tr|Q9HW68|Q9HW68_PSEAE	1	1	1	>tr|Q9HW68|Q9HW68_PSEAE Probable fumarase OS=Pseudomonas aeruginosa (strain ATCC 15692 / PAO1 / 1C / PRS 101 / LMG 12228) GN=PA4333 PE=4 SV=1	1	1	1	1	2.8	2.8	2.8	54.763	507	507	0.0041494	6.0433	1870000	1				198	845	TRUE	854	1527	2852	2852
tr|Q9HW72|Q9HW72_PSEAE	tr|Q9HW72|Q9HW72_PSEAE	4	4	4	>tr|Q9HW72|Q9HW72_PSEAE Pyruvate kinase OS=Pseudomonas aeruginosa (strain ATCC 15692 / PAO1 / 1C / PRS 101 / LMG 12228) GN=pykA PE=3 SV=1	1	4	4	4	18	18	18	52.252	483	483	0	23.748	9989300	7				199	35;325;341;529	True;True;True;True	35;330;346;535	67;599;622;963;964	120;1135;1169;1782;1783;1784;1785	120;1135;1169;1784
tr|Q9HW80|Q9HW80_PSEAE	tr|Q9HW80|Q9HW80_PSEAE	1	1	1	>tr|Q9HW80|Q9HW80_PSEAE Uncharacterized protein OS=Pseudomonas aeruginosa (strain ATCC 15692 / PAO1 / 1C / PRS 101 / LMG 12228) GN=PA4321 PE=4 SV=1	1	1	1	1	2.6	2.6	2.6	47.703	423	423	0.007326	5.4568	3986200	1				200	668	TRUE	675	1219	2244	2244
tr|Q9HWG9|Q9HWG9_PSEAE	tr|Q9HWG9|Q9HWG9_PSEAE	5	5	5	>tr|Q9HWG9|Q9HWG9_PSEAE Flavin-containing monooxygenase OS=Pseudomonas aeruginosa (strain ATCC 15692 / PAO1 / 1C / PRS 101 / LMG 12228) GN=phzS PE=1 SV=1	1	5	5	5	23.6	23.6	23.6	43.644	402	402	0	38.351	26968000	16				201	177;526;691;989;1187	True;True;True;True;True	180;532;698;999;1198	322;955;956;1259;1260;1794;2134;2135	616;617;1766;1767;1768;1769;1770;1771;2320;2321;2322;3327;3892;3893;3894;3895	616;1771;2321;3327;3895
tr|Q9HWQ0|Q9HWQ0_PSEAE	tr|Q9HWQ0|Q9HWQ0_PSEAE	6	6	6	>tr|Q9HWQ0|Q9HWQ0_PSEAE Probable iron-sulfur protein OS=Pseudomonas aeruginosa (strain ATCC 15692 / PAO1 / 1C / PRS 101 / LMG 12228) GN=PA4131 PE=4 SV=1	1	6	6	6	14.5	14.5	14.5	63.991	573	573	0	46.988	50347000	11				202	55;270;367;486;512;672	True;True;True;True;True;True	56;274;372;492;518;679	107;497;498;665;666;873;936;937;1225;1226	211;957;958;1237;1238;1239;1609;1736;1737;2250;2251;2252	211;958;1237;1609;1737;2252
tr|Q9HX05|Q9HX05_PSEAE;tr|Q9I2C4|Q9I2C4_PSEAE	tr|Q9HX05|Q9HX05_PSEAE;tr|Q9I2C4|Q9I2C4_PSEAE	5;4	5;4	5;4	>tr|Q9HX05|Q9HX05_PSEAE Probable aldehyde dehydrogenase OS=Pseudomonas aeruginosa (strain ATCC 15692 / PAO1 / 1C / PRS 101 / LMG 12228) GN=PA4022 PE=3 SV=1;>tr|Q9I2C4|Q9I2C4_PSEAE NAD+ dependent aldehyde dehydrogenase ExaC OS=Pseudomonas aeruginosa (strain	2	5	5	5	15.6	15.6	15.6	54.979	506	506;506	0	32.845	31054000	10				203	80;97;281;436;585	True;True;True;True;True	82;99;285;442;591	156;183;184;517;786;1066;1067	309;352;353;354;355;981;1467;1951;1952;1953	309;354;981;1467;1951
tr|Q9HX12|Q9HX12_PSEAE	tr|Q9HX12|Q9HX12_PSEAE	1	1	1	>tr|Q9HX12|Q9HX12_PSEAE Uncharacterized protein OS=Pseudomonas aeruginosa (strain ATCC 15692 / PAO1 / 1C / PRS 101 / LMG 12228) GN=PA4015 PE=4 SV=1	1	1	1	1	8.6	8.6	8.6	16.7	151	151	0	6.497	1458000	1				204	649	TRUE	655	1185	2192	2192
tr|Q9HX44|Q9HX44_PSEAE	tr|Q9HX44|Q9HX44_PSEAE	2	2	2	>tr|Q9HX44|Q9HX44_PSEAE Probable acyl-CoA dehydrogenase OS=Pseudomonas aeruginosa (strain ATCC 15692 / PAO1 / 1C / PRS 101 / LMG 12228) GN=PA3972 PE=3 SV=1	1	2	2	2	8.4	8.4	8.4	60.338	549	549	0	12.781	3232300	4				205	639;1086	True;True	645;1097	1168;1952;1953	2163;3591;3592;3593;3594	2163;3593
tr|Q9HXM5|Q9HXM5_PSEAE	tr|Q9HXM5|Q9HXM5_PSEAE	2	2	2	>tr|Q9HXM5|Q9HXM5_PSEAE Inosine-5-monophosphate dehydrogenase OS=Pseudomonas aeruginosa (strain ATCC 15692 / PAO1 / 1C / PRS 101 / LMG 12228) GN=guaB PE=1 SV=1	1	2	2	2	7	7	7	51.707	489	489	0	12.526	2720000	4				206	371;1053	True;True	376;1064	674;1896;1897	1254;3504;3505;3506	1254;3505
tr|Q9HY01|Q9HY01_PSEAE	tr|Q9HY01|Q9HY01_PSEAE	2	2	2	>tr|Q9HY01|Q9HY01_PSEAE S-(hydroxymethyl)glutathione dehydrogenase OS=Pseudomonas aeruginosa (strain ATCC 15692 / PAO1 / 1C / PRS 101 / LMG 12228) GN=adhC PE=3 SV=1	1	2	2	2	7	7	7	39.208	370	370	0	13.613	11623000	4				207	259;473	True;True	263;479	475;476;847	919;920;921;1562	919;1562
tr|Q9HY12|Q9HY12_PSEAE	tr|Q9HY12|Q9HY12_PSEAE	1	1	1	>tr|Q9HY12|Q9HY12_PSEAE Uncharacterized protein OS=Pseudomonas aeruginosa (strain ATCC 15692 / PAO1 / 1C / PRS 101 / LMG 12228) GN=PA3614 PE=4 SV=1	1	1	1	1	2.1	2.1	2.1	51.921	467	467	0.0041841	6.1109	981540	1				208	805	TRUE	814	1464	2733	2733
tr|Q9HY13|Q9HY13_PSEAE	tr|Q9HY13|Q9HY13_PSEAE	9	9	9	>tr|Q9HY13|Q9HY13_PSEAE Uncharacterized protein OS=Pseudomonas aeruginosa (strain ATCC 15692 / PAO1 / 1C / PRS 101 / LMG 12228) GN=PA3613 PE=4 SV=1	1	9	9	9	18.2	18.2	18.2	88.378	801	801	0	60.049	34680000	21				209	155;516;564;707;948;951;1001;1065;1090	True;True;True;True;True;True;True;True;True	158;522;570;714;958;961;1011;1076;1101	286;287;942;1033;1287;1718;1719;1723;1724;1814;1915;1916;1961	545;546;1743;1902;2396;2397;3185;3186;3187;3188;3195;3196;3197;3198;3362;3363;3364;3536;3537;3614;3615	546;1743;1902;2397;3186;3196;3363;3537;3614
tr|Q9HY77|Q9HY77_PSEAE	tr|Q9HY77|Q9HY77_PSEAE	3	3	3	>tr|Q9HY77|Q9HY77_PSEAE Glutaredoxin OS=Pseudomonas aeruginosa (strain ATCC 15692 / PAO1 / 1C / PRS 101 / LMG 12228) GN=PA3533 PE=3 SV=1	1	3	3	3	31.5	31.5	31.5	11.843	108	108	0	30.31	20537000	11				210	274;297;727	True;True;True	278;302;734	505;548;549;1319;1320;1321	967;1050;1051;1052;1053;2459;2460;2461;2462;2463;2464	967;1052;2459
tr|Q9HY79|Q9HY79_PSEAE	tr|Q9HY79|Q9HY79_PSEAE	2	2	2	>tr|Q9HY79|Q9HY79_PSEAE Ferroxidase OS=Pseudomonas aeruginosa (strain ATCC 15692 / PAO1 / 1C / PRS 101 / LMG 12228) GN=bfrB PE=1 SV=1	1	2	2	2	20.3	20.3	20.3	18.553	158	158	0	18.559	30906000	7				211	491;493	True;True	497;499	881;883;884;885	1620;1622;1623;1624;1625;1626;1627	1620;1627
tr|Q9HY81|Q9HY81_PSEAE	tr|Q9HY81|Q9HY81_PSEAE	8	8	8	>tr|Q9HY81|Q9HY81_PSEAE Probable peroxidase OS=Pseudomonas aeruginosa (strain ATCC 15692 / PAO1 / 1C / PRS 101 / LMG 12228) GN=PA3529 PE=1 SV=1	1	8	8	8	44.5	44.5	44.5	21.822	200	200	0	54.603	74513000	20				212	157;332;389;513;817;830;928;1191	True;True;True;True;True;True;True;True	160;337;394;519;826;839;938;1202	290;291;609;706;938;1481;1482;1483;1505;1663;1664;2142;2143	550;551;552;553;554;1149;1319;1738;2763;2764;2765;2766;2808;3077;3078;3079;3080;3081;3904;3905;3906	554;1149;1319;1738;2765;2808;3080;3906
tr|Q9HYC8|Q9HYC8_PSEAE	tr|Q9HYC8|Q9HYC8_PSEAE	1	1	1	>tr|Q9HYC8|Q9HYC8_PSEAE Iron-sulfur cluster carrier protein OS=Pseudomonas aeruginosa (strain ATCC 15692 / PAO1 / 1C / PRS 101 / LMG 12228) GN=PA3481 PE=3 SV=1	1	1	1	1	7.1	7.1	7.1	38.888	364	364	0	6.5369	3315600	3				213	1061	TRUE	1072	1908	3525;3526;3527	3526
tr|Q9HYR5|Q9HYR5_PSEAE	tr|Q9HYR5|Q9HYR5_PSEAE	1	1	1	>tr|Q9HYR5|Q9HYR5_PSEAE Probable short chain dehydrogenase OS=Pseudomonas aeruginosa (strain ATCC 15692 / PAO1 / 1C / PRS 101 / LMG 12228) GN=PA3330 PE=4 SV=1	1	1	1	1	8.6	8.6	8.6	32.031	304	304	0	13.047	2468400	2				214	704	TRUE	711	1283	2387;2388	2387
tr|Q9HYR6|Q9HYR6_PSEAE	tr|Q9HYR6|Q9HYR6_PSEAE	2	2	2	>tr|Q9HYR6|Q9HYR6_PSEAE Uncharacterized protein OS=Pseudomonas aeruginosa (strain ATCC 15692 / PAO1 / 1C / PRS 101 / LMG 12228) GN=PA3329 PE=4 SV=1	1	2	2	2	10.9	10.9	10.9	49.134	442	442	0	16.76	13444000	8				215	174;566	True;True	177;572	317;318;1036;1037	610;611;612;1908;1909;1910;1911;1912	611;1912
tr|Q9HYR7|Q9HYR7_PSEAE	tr|Q9HYR7|Q9HYR7_PSEAE	1	1	1	>tr|Q9HYR7|Q9HYR7_PSEAE Probable FAD-dependent monooxygenase OS=Pseudomonas aeruginosa (strain ATCC 15692 / PAO1 / 1C / PRS 101 / LMG 12228) GN=PA3328 PE=4 SV=1	1	1	1	1	4.6	4.6	4.6	42.498	388	388	0	12.03	8237100	4				216	148	TRUE	150	272;273	514;515;516;517	517
tr|Q9HYR8|Q9HYR8_PSEAE	tr|Q9HYR8|Q9HYR8_PSEAE	13	13	13	>tr|Q9HYR8|Q9HYR8_PSEAE Probable non-ribosomal peptide synthetase OS=Pseudomonas aeruginosa (strain ATCC 15692 / PAO1 / 1C / PRS 101 / LMG 12228) GN=PA3327 PE=4 SV=1	1	13	13	13	8.4	8.4	8.4	259.4	2352	2352	0	82.757	44355000	18				217	44;49;65;94;134;158;317;494;765;885;931;976;1099	True;True;True;True;True;True;True;True;True;True;True;True;True	44;49;67;96;136;161;322;500;772;894;941;986;1110	86;94;95;132;133;180;247;292;581;886;887;1381;1594;1669;1773;1973	168;177;178;179;180;181;182;275;276;349;470;555;1100;1628;1629;2554;2965;3087;3297;3630;3631	168;179;275;349;470;555;1100;1629;2554;2965;3087;3297;3630
tr|Q9HYT5|Q9HYT5_PSEAE	tr|Q9HYT5|Q9HYT5_PSEAE	8	8	8	>tr|Q9HYT5|Q9HYT5_PSEAE Uncharacterized protein OS=Pseudomonas aeruginosa (strain ATCC 15692 / PAO1 / 1C / PRS 101 / LMG 12228) GN=PA3309 PE=3 SV=1	1	8	8	8	65.6	65.6	65.6	16.496	151	151	0	63.197	186120000	38				218	81;216;426;450;501;651;867;1078	True;True;True;True;True;True;True;True	83;220;432;456;507;657;658;876;1089	157;394;395;772;773;774;813;897;898;1188;1189;1190;1564;1565;1938;1939	310;783;784;785;1446;1447;1448;1449;1450;1451;1521;1643;1644;1645;1646;1647;1648;1649;2195;2196;2197;2198;2199;2200;2201;2202;2203;2204;2205;2206;2918;2919;2920;3571;3572;3573;3574;3575	310;784;1446;1521;1643;2196;2918;3572	13	129
tr|Q9HYZ6|Q9HYZ6_PSEAE	tr|Q9HYZ6|Q9HYZ6_PSEAE	1	1	1	>tr|Q9HYZ6|Q9HYZ6_PSEAE Site-determining protein OS=Pseudomonas aeruginosa (strain ATCC 15692 / PAO1 / 1C / PRS 101 / LMG 12228) GN=minD PE=3 SV=1	1	1	1	1	4.8	4.8	4.8	29.635	271	271	0	6.4965	10924000	2				219	637	TRUE	643	1165;1166	2160;2161	2161
tr|Q9HZ78|Q9HZ78_PSEAE	tr|Q9HZ78|Q9HZ78_PSEAE	2	2	2	>tr|Q9HZ78|Q9HZ78_PSEAE LPS biosynthesis protein WbpG OS=Pseudomonas aeruginosa (strain ATCC 15692 / PAO1 / 1C / PRS 101 / LMG 12228) GN=wbpG PE=4 SV=1	1	2	2	2	5.8	5.8	5.8	43.503	377	377	0	13.578	6550500	2				220	31;592	True;True	31;598	60;1079	105;1975	105;1975
tr|Q9HZC5|Q9HZC5_PSEAE	tr|Q9HZC5|Q9HZC5_PSEAE	1	1	1	>tr|Q9HZC5|Q9HZC5_PSEAE Aminopeptidase N OS=Pseudomonas aeruginosa (strain ATCC 15692 / PAO1 / 1C / PRS 101 / LMG 12228) GN=pepN PE=4 SV=1	1	1	1	1	1.2	1.2	1.2	100.05	885	885	0	7.3816	1749000	2				221	324	TRUE	329	597;598	1133;1134	1133
tr|Q9HZK4|Q9HZK4_PSEAE	tr|Q9HZK4|Q9HZK4_PSEAE	11	11	11	>tr|Q9HZK4|Q9HZK4_PSEAE Glyceraldehyde-3-phosphate dehydrogenase OS=Pseudomonas aeruginosa (strain ATCC 15692 / PAO1 / 1C / PRS 101 / LMG 12228) GN=PA3001 PE=3 SV=1	1	11	11	11	31	31	31	50.111	461	461	0	86.956	92492000	29				222	26;230;242;593;719;785;821;876;901;1105;1116	True;True;True;True;True;True;True;True;True;True;True	26;234;246;599;726;794;830;885;910;1116;1127	49;50;51;419;420;445;446;1080;1081;1306;1431;1432;1490;1578;1579;1620;1983;1984;2006;2007	89;90;91;824;825;868;869;870;871;1976;1977;2435;2436;2437;2685;2686;2782;2939;2940;2941;2999;3643;3644;3645;3646;3680;3681;3682;3683;3684	90;824;868;1977;2436;2686;2782;2941;2999;3643;3684
tr|Q9I028|Q9I028_PSEAE	tr|Q9I028|Q9I028_PSEAE	5	5	5	>tr|Q9I028|Q9I028_PSEAE Probable acyl-CoA dehydrogenase OS=Pseudomonas aeruginosa (strain ATCC 15692 / PAO1 / 1C / PRS 101 / LMG 12228) GN=PA2815 PE=4 SV=1	1	5	5	5	13.3	13.3	13.3	88.762	815	815	0	31.441	39475000	9				223	202;273;499;597;1123	True;True;True;True;True	206;277;505;603;1134	369;504;894;1088;1089;2020;2021	735;966;1640;1994;1995;3715;3716;3717;3718;3719	735;966;1640;1995;3717
tr|Q9I056|Q9I056_PSEAE	tr|Q9I056|Q9I056_PSEAE	1	1	1	>tr|Q9I056|Q9I056_PSEAE Carboxypeptidase G2 OS=Pseudomonas aeruginosa (strain ATCC 15692 / PAO1 / 1C / PRS 101 / LMG 12228) GN=cpg2 PE=4 SV=1	1	1	1	1	3.4	3.4	3.4	44.007	412	412	0.0078431	5.7029	649640	1				224	715	TRUE	722	1299	2414	2414
tr|Q9I0L4|Q9I0L4_PSEAE	tr|Q9I0L4|Q9I0L4_PSEAE	8	8	8	>tr|Q9I0L4|Q9I0L4_PSEAE Isocitrate dehydrogenase OS=Pseudomonas aeruginosa (strain ATCC 15692 / PAO1 / 1C / PRS 101 / LMG 12228) GN=idh PE=4 SV=1	1	8	8	8	19.3	19.3	19.3	81.633	741	741	0	66.316	51545000	20				225	96;150;212;355;376;495;754;1106	True;True;True;True;True;True;True;True	98;152;216;360;381;501;761;1117	182;276;277;385;386;643;685;888;889;1363;1364;1985	351;522;523;765;766;767;768;769;770;771;1203;1281;1630;1631;1632;1633;1634;2528;2529;3647	351;522;765;1203;1281;1630;2529;3647
tr|Q9I0L5|Q9I0L5_PSEAE	tr|Q9I0L5|Q9I0L5_PSEAE	18	18	18	>tr|Q9I0L5|Q9I0L5_PSEAE Isocitrate dehydrogenase [NADP] OS=Pseudomonas aeruginosa (strain ATCC 15692 / PAO1 / 1C / PRS 101 / LMG 12228) GN=icd PE=3 SV=1	1	18	18	18	51.2	51.2	51.2	45.577	418	418	0	170.46	354110000	78				226	93;140;173;213;316;323;428;429;443;540;541;823;932;1019;1110;1158;1159;1172	True;True;True;True;True;True;True;True;True;True;True;True;True;True;True;True;True;True	95;142;176;217;321;328;434;435;449;546;547;832;942;1030;1121;1169;1170;1183	178;179;259;260;313;314;315;316;387;388;389;390;580;593;594;595;596;776;777;778;779;796;797;989;990;991;992;993;994;1493;1494;1670;1846;1847;1994;1995;1996;2081;2082;2083;2107;2108;2109	343;344;345;346;347;348;497;498;499;601;602;603;604;605;606;607;608;609;772;773;774;775;776;777;778;1098;1099;1121;1122;1123;1124;1125;1126;1127;1128;1129;1130;1131;1132;1453;1454;1455;1456;1457;1458;1459;1484;1485;1820;1821;1822;1823;1824;1825;2788;2789;2790;2791;3088;3409;3410;3411;3662;3663;3664;3665;3666;3667;3668;3669;3670;3815;3816;3817;3818;3852;3853;3854;3855	346;499;609;776;1099;1122;1454;1459;1485;1821;1824;2790;3088;3411;3667;3816;3817;3855
tr|Q9I0T1|Q9I0T1_PSEAE	tr|Q9I0T1|Q9I0T1_PSEAE	7	7	7	>tr|Q9I0T1|Q9I0T1_PSEAE Probable acyl-CoA thiolase OS=Pseudomonas aeruginosa (strain ATCC 15692 / PAO1 / 1C / PRS 101 / LMG 12228) GN=PA2553 PE=3 SV=1	1	7	7	7	25.5	25.5	25.5	41.4	396	396	0	51.045	45956000	18				227	225;380;580;694;993;1003;1089	True;True;True;True;True;True;True	229;385;586;701;1003;1014;1100	409;410;692;1059;1263;1264;1801;1802;1818;1960	810;811;1294;1942;2325;2326;2327;2328;3343;3344;3345;3346;3347;3348;3368;3611;3612;3613	810;1294;1942;2327;3343;3368;3612
tr|Q9I0T2|Q9I0T2_PSEAE	tr|Q9I0T2|Q9I0T2_PSEAE	1	1	1	>tr|Q9I0T2|Q9I0T2_PSEAE Probable acyl-CoA dehydrogenase OS=Pseudomonas aeruginosa (strain ATCC 15692 / PAO1 / 1C / PRS 101 / LMG 12228) GN=PA2552 PE=3 SV=1	1	1	1	1	3.2	3.2	3.2	40.908	375	375	0	8.156	3956300	1				228	463	TRUE	469	832	1542	1542
tr|Q9I1E8|Q9I1E8_PSEAE	tr|Q9I1E8|Q9I1E8_PSEAE	1	1	1	>tr|Q9I1E8|Q9I1E8_PSEAE Uncharacterized protein OS=Pseudomonas aeruginosa (strain ATCC 15692 / PAO1 / 1C / PRS 101 / LMG 12228) GN=PA2330 PE=4 SV=1	1	1	1	1	3.9	3.9	3.9	37.68	355	355	0	6.6789	1925900	1				229	605	TRUE	611	1108	2049	2049
tr|Q9I1H3|Q9I1H3_PSEAE	tr|Q9I1H3|Q9I1H3_PSEAE	3	3	3	>tr|Q9I1H3|Q9I1H3_PSEAE AmbE OS=Pseudomonas aeruginosa (strain ATCC 15692 / PAO1 / 1C / PRS 101 / LMG 12228) GN=ambE PE=4 SV=1	1	3	3	3	1.7	1.7	1.7	229.04	2124	2124	0	17.097	5699000	4				230	114;640;664	True;True;True	116;646;671	215;1169;1215	420;2164;2165;2238	420;2164;2238
tr|Q9I1H5|Q9I1H5_PSEAE	tr|Q9I1H5|Q9I1H5_PSEAE	1	1	1	>tr|Q9I1H5|Q9I1H5_PSEAE Chitinase OS=Pseudomonas aeruginosa (strain ATCC 15692 / PAO1 / 1C / PRS 101 / LMG 12228) GN=chiC PE=3 SV=1	1	1	1	1	6	6	6	53.042	483	483	0.0077519	5.6441	10121000	2				231	571	TRUE	577	1043;1044	1919;1920	1919
tr|Q9I1N7|Q9I1N7_PSEAE	tr|Q9I1N7|Q9I1N7_PSEAE	2	2	2	>tr|Q9I1N7|Q9I1N7_PSEAE PslB OS=Pseudomonas aeruginosa (strain ATCC 15692 / PAO1 / 1C / PRS 101 / LMG 12228) GN=pslB PE=3 SV=1	1	2	2	2	9.4	9.4	9.4	53.515	488	488	0	13.537	4400600	3				232	267;826	True;True	271;835	489;490;1500	945;946;2800	945;2800
tr|Q9I1Z6|Q9I1Z6_PSEAE	tr|Q9I1Z6|Q9I1Z6_PSEAE	1	1	1	>tr|Q9I1Z6|Q9I1Z6_PSEAE Alcohol dehydrogenase (Zn-dependent) OS=Pseudomonas aeruginosa (strain ATCC 15692 / PAO1 / 1C / PRS 101 / LMG 12228) GN=PA2119 PE=3 SV=1	1	1	1	1	2.5	2.5	2.5	38.561	366	366	0	6.6929	1936200	1				233	612	TRUE	618	1124	2088	2088
tr|Q9I246|Q9I246_PSEAE	tr|Q9I246|Q9I246_PSEAE	4	4	4	>tr|Q9I246|Q9I246_PSEAE Probable carbamoyl transferase OS=Pseudomonas aeruginosa (strain ATCC 15692 / PAO1 / 1C / PRS 101 / LMG 12228) GN=PA2069 PE=4 SV=1	1	4	4	4	8	8	8	63.382	574	574	0	23.928	19246000	5				234	430;525;642;895	True;True;True;True	436;531;648;904	780;954;1172;1173;1608	1460;1765;2172;2173;2985	1460;1765;2173;2985
tr|Q9I2A9|Q9I2A9_PSEAE	tr|Q9I2A9|Q9I2A9_PSEAE	1	1	1	>tr|Q9I2A9|Q9I2A9_PSEAE DhcB, dehydrocarnitine CoA transferase, subunit B OS=Pseudomonas aeruginosa (strain ATCC 15692 / PAO1 / 1C / PRS 101 / LMG 12228) GN=dhcB PE=4 SV=1	1	1	1	1	11	11	11	23.187	218	218	0	8.2542	2777000	6				235	388	TRUE	393	704;705	1313;1314;1315;1316;1317;1318	1314
tr|Q9I2R2|Q9I2R2_PSEAE	tr|Q9I2R2|Q9I2R2_PSEAE	2	2	2	>tr|Q9I2R2|Q9I2R2_PSEAE Probable oxidoreductase OS=Pseudomonas aeruginosa (strain ATCC 15692 / PAO1 / 1C / PRS 101 / LMG 12228) GN=PA1833 PE=4 SV=1	1	2	2	2	8.5	8.5	8.5	34.551	330	330	0	12.996	3508400	0				236	409;615	True;True	415;621	741;1127	1373;2091	1373;2091
tr|Q9I2V3|Q9I2V3_PSEAE	tr|Q9I2V3|Q9I2V3_PSEAE	2	2	2	>tr|Q9I2V3|Q9I2V3_PSEAE Uncharacterized protein OS=Pseudomonas aeruginosa (strain ATCC 15692 / PAO1 / 1C / PRS 101 / LMG 12228) GN=PA1789 PE=1 SV=1	1	2	2	2	11.5	11.5	11.5	31.273	287	287	0	14.659	10761000	4				237	488;903	True;True	494;912	875;876;1622	1611;1612;3002;3003	1612;3003
tr|Q9I2W9|Q9I2W9_PSEAE	tr|Q9I2W9|Q9I2W9_PSEAE	11	11	11	>tr|Q9I2W9|Q9I2W9_PSEAE Phosphoenolpyruvate synthase OS=Pseudomonas aeruginosa (strain ATCC 15692 / PAO1 / 1C / PRS 101 / LMG 12228) GN=ppsA PE=3 SV=1	1	11	11	11	18.8	18.8	18.8	85.816	791	791	0	87.09	60399000	20				238	37;88;175;283;294;438;584;711;794;981;1048	True;True;True;True;True;True;True;True;True;True;True	37;90;178;287;299;444;590;718;803;991;1059	70;71;169;319;519;542;543;788;789;1065;1294;1446;1780;1781;1889	129;130;131;326;327;613;983;1041;1042;1043;1044;1469;1470;1950;2406;2704;2705;3304;3305;3494	131;327;613;983;1044;1469;1950;2406;2705;3305;3494
tr|Q9I2Z1|Q9I2Z1_PSEAE	tr|Q9I2Z1|Q9I2Z1_PSEAE	2	2	2	>tr|Q9I2Z1|Q9I2Z1_PSEAE Uncharacterized protein OS=Pseudomonas aeruginosa (strain ATCC 15692 / PAO1 / 1C / PRS 101 / LMG 12228) GN=PA1746 PE=4 SV=1	1	2	2	2	16.7	16.7	16.7	18.189	168	168	0	13.969	8192300	2				239	130;425	True;True	132;431	240;771	460;1445	460;1445
tr|Q9I363|Q9I363_PSEAE	tr|Q9I363|Q9I363_PSEAE	1	1	1	>tr|Q9I363|Q9I363_PSEAE Probable ClpA/B-type protease OS=Pseudomonas aeruginosa (strain ATCC 15692 / PAO1 / 1C / PRS 101 / LMG 12228) GN=PA1662 PE=3 SV=1	1	1	1	1	2.3	2.3	2.3	95.774	877	877	0.0041322	6.0102	0	1				240	1102	TRUE	1113	1979	3639	3639
tr|Q9I3B2|Q9I3B2_PSEAE	tr|Q9I3B2|Q9I3B2_PSEAE	3	3	3	>tr|Q9I3B2|Q9I3B2_PSEAE Beta-ketoacyl-ACP synthase I OS=Pseudomonas aeruginosa (strain ATCC 15692 / PAO1 / 1C / PRS 101 / LMG 12228) GN=fabB PE=3 SV=1	1	3	3	3	11.9	11.9	11.9	42.806	405	405	0	23.678	28220000	7				241	284;319;968	True;True;True	288;324;978	520;521;584;585;1761	984;985;986;1103;1104;1105;3281	986;1104;3281
tr|Q9I3D3|Q9I3D3_PSEAE	tr|Q9I3D3|Q9I3D3_PSEAE	17	17	17	>tr|Q9I3D3|Q9I3D3_PSEAE 2-oxoglutarate dehydrogenase (E1 subunit) OS=Pseudomonas aeruginosa (strain ATCC 15692 / PAO1 / 1C / PRS 101 / LMG 12228) GN=sucA PE=4 SV=1	1	17	17	17	27.3	27.3	27.3	105.88	943	943	0	128.42	116790000	48				242	163;171;183;250;257;268;306;387;452;662;663;675;682;718;749;933;1193	True;True;True;True;True;True;True;True;True;True;True;True;True;True;True;True;True	166;174;186;254;261;272;311;392;458;669;670;682;689;725;756;943;1204	297;310;311;329;460;472;491;492;493;494;563;702;703;816;1211;1212;1213;1214;1230;1242;1304;1305;1355;1356;1671;2145	560;595;596;597;598;599;636;891;915;947;948;949;950;951;1070;1071;1072;1073;1309;1310;1311;1312;1524;1525;2232;2233;2234;2235;2236;2237;2258;2286;2424;2425;2426;2427;2428;2429;2430;2431;2432;2433;2434;2515;2516;2517;2518;3089;3908	560;595;636;891;915;949;1072;1309;1524;2232;2237;2258;2286;2426;2515;3089;3908
tr|Q9I3D4|Q9I3D4_PSEAE	tr|Q9I3D4|Q9I3D4_PSEAE	5	5	5	>tr|Q9I3D4|Q9I3D4_PSEAE Succinate dehydrogenase (B subunit) OS=Pseudomonas aeruginosa (strain ATCC 15692 / PAO1 / 1C / PRS 101 / LMG 12228) GN=sdhB PE=4 SV=1	1	5	5	5	26	26	26	26.155	235	235	0	41.73	111860000	23				243	313;578;700;753;1083	True;True;True;True;True	318;584;707;760;1094	574;575;1056;1057;1274;1275;1276;1361;1362;1946;1947;1948	1087;1088;1089;1090;1091;1936;1937;1938;1939;1940;2374;2375;2376;2377;2378;2524;2525;2526;2527;3584;3585;3586;3587	1087;1938;2375;2526;3587
tr|Q9I3D5|Q9I3D5_PSEAE	tr|Q9I3D5|Q9I3D5_PSEAE	15	15	15	>tr|Q9I3D5|Q9I3D5_PSEAE Succinate dehydrogenase flavoprotein subunit OS=Pseudomonas aeruginosa (strain ATCC 15692 / PAO1 / 1C / PRS 101 / LMG 12228) GN=sdhA PE=3 SV=1	1	15	15	15	30.3	30.3	30.3	63.531	590	590	0	140.92	207740000	65				244	334;335;343;363;445;446;504;535;536;579;606;800;966;1006;1161	True;True;True;True;True;True;True;True;True;True;True;True;True;True;True	339;340;348;368;451;452;510;541;542;585;612;809;976;1017;1172	612;613;614;615;624;625;658;659;800;801;802;803;804;903;904;973;974;975;976;977;978;1058;1109;1110;1111;1112;1113;1114;1115;1455;1456;1759;1821;1822;1823;2086	1155;1156;1157;1158;1171;1172;1223;1224;1225;1226;1227;1228;1488;1489;1490;1491;1492;1493;1494;1495;1496;1497;1498;1499;1500;1501;1502;1503;1504;1505;1506;1507;1508;1662;1663;1797;1798;1799;1800;1801;1802;1803;1804;1805;1941;2050;2051;2052;2053;2054;2055;2056;2057;2058;2059;2060;2061;2062;2063;2716;2717;2718;3279;3371;3372;3373;3821	1156;1158;1171;1227;1490;1499;1662;1797;1805;1941;2059;2718;3279;3371;3821
tr|Q9I3G0|Q9I3G0_PSEAE	tr|Q9I3G0|Q9I3G0_PSEAE	1	1	1	>tr|Q9I3G0|Q9I3G0_PSEAE Cytochrome c oxidase, cbb3-type, CcoN subunit OS=Pseudomonas aeruginosa (strain ATCC 15692 / PAO1 / 1C / PRS 101 / LMG 12228) GN=ccoN2 PE=3 SV=1	1	1	1	1	3.6	3.6	3.6	53.09	475	475	0	7.5117	16301000	4				245	1017	TRUE	1028	1843;1844	3404;3405;3406;3407	3405
tr|Q9I3G1|Q9I3G1_PSEAE;tr|Q9I3G4|Q9I3G4_PSEAE	tr|Q9I3G1|Q9I3G1_PSEAE	4;1	4;1	4;1	>tr|Q9I3G1|Q9I3G1_PSEAE Cytochrome c oxidase, cbb3-type, CcoO subunit OS=Pseudomonas aeruginosa (strain ATCC 15692 / PAO1 / 1C / PRS 101 / LMG 12228) GN=ccoO2 PE=4 SV=1	2	4	4	4	25.7	25.7	25.7	22.778	202	202;203	0	36.556	35767000	12				246	762;763;957;983	True;True;True;True	769;770;967;993	1377;1378;1737;1738;1739;1740;1784;1785;1786	2550;2551;3222;3223;3224;3225;3226;3227;3308;3309;3310;3311;3312	2550;2551;3222;3312
tr|Q9I3G2|Q9I3G2_PSEAE	tr|Q9I3G2|Q9I3G2_PSEAE	6	6	6	>tr|Q9I3G2|Q9I3G2_PSEAE Cbb3-type cytochrome c oxidase subunit OS=Pseudomonas aeruginosa (strain ATCC 15692 / PAO1 / 1C / PRS 101 / LMG 12228) GN=ccoP2 PE=3 SV=1	1	6	6	6	31.8	31.8	31.8	33.812	308	308	0	43.854	91392000	16				247	333;397;408;956;1160;1167	True;True;True;True;True;True	338;402;414;966;1171;1178	610;611;719;739;740;1733;1734;1735;1736;2084;2085;2097;2098	1150;1151;1152;1153;1154;1339;1340;1371;1372;3218;3219;3220;3221;3819;3820;3836;3837;3838	1150;1340;1372;3221;3819;3837
tr|Q9I3G3|Q9I3G3_PSEAE	tr|Q9I3G3|Q9I3G3_PSEAE	1	1	1	>tr|Q9I3G3|Q9I3G3_PSEAE Cytochrome c oxidase, cbb3-type, CcoN subunit OS=Pseudomonas aeruginosa (strain ATCC 15692 / PAO1 / 1C / PRS 101 / LMG 12228) GN=ccoN1 PE=3 SV=1	1	1	1	1	2.9	2.9	2.9	53.108	475	475	0	6.6319	8864600	3				248	4	TRUE	4	8;9	11;12;13	13
tr|Q9I3G6|Q9I3G6_PSEAE	tr|Q9I3G6|Q9I3G6_PSEAE	2	2	2	>tr|Q9I3G6|Q9I3G6_PSEAE Probable ferredoxin OS=Pseudomonas aeruginosa (strain ATCC 15692 / PAO1 / 1C / PRS 101 / LMG 12228) GN=PA1551 PE=4 SV=1	1	2	2	2	4.9	4.9	4.9	53.62	471	471	0	17.451	8987200	4				249	385;451	True;True	390;457	699;814;815	1302;1303;1522;1523	1303;1522
tr|Q9I3H0|Q9I3H0_PSEAE	tr|Q9I3H0|Q9I3H0_PSEAE	1	1	1	>tr|Q9I3H0|Q9I3H0_PSEAE Uncharacterized protein OS=Pseudomonas aeruginosa (strain ATCC 15692 / PAO1 / 1C / PRS 101 / LMG 12228) GN=PA1547 PE=4 SV=1	1	1	1	1	4	4	4	24.054	227	227	0.0073529	5.4615	2341000	1				250	638	TRUE	644	1167	2162	2162
tr|Q9I3L4|Q9I3L4_PSEAE	tr|Q9I3L4|Q9I3L4_PSEAE	1	1	1	>tr|Q9I3L4|Q9I3L4_PSEAE Pyruvate kinase OS=Pseudomonas aeruginosa (strain ATCC 15692 / PAO1 / 1C / PRS 101 / LMG 12228) GN=pykF PE=3 SV=1	1	1	1	1	2.9	2.9	2.9	51.545	477	477	0.0074627	5.4969	624850	0				251	342	TRUE	347	623	1170	1170
tr|Q9I3X2|Q9I3X2_PSEAE	tr|Q9I3X2|Q9I3X2_PSEAE	1	1	1	>tr|Q9I3X2|Q9I3X2_PSEAE Uncharacterized protein OS=Pseudomonas aeruginosa (strain ATCC 15692 / PAO1 / 1C / PRS 101 / LMG 12228) GN=PA1372 PE=4 SV=1	1	1	1	1	2.3	2.3	2.3	79.82	711	711	0	7.6492	2459400	1				252	530	TRUE	536	965	1786	1786
tr|Q9I4I1|Q9I4I1_PSEAE	tr|Q9I4I1|Q9I4I1_PSEAE	5	5	5	>tr|Q9I4I1|Q9I4I1_PSEAE Ribonucleoside-diphosphate reductase OS=Pseudomonas aeruginosa (strain ATCC 15692 / PAO1 / 1C / PRS 101 / LMG 12228) GN=nrdA PE=3 SV=1	1	5	5	5	8.6	8.6	8.6	107.11	963	963	0	39.79	26909000	10				253	21;291;782;924;1147	True;True;True;True;True	21;295;791;933;1158	41;42;534;1422;1423;1654;1655;2061;2062	77;78;79;1013;2649;2650;3050;3051;3052;3784;3785	79;1013;2650;3051;3784
tr|Q9I4I2|Q9I4I2_PSEAE	tr|Q9I4I2|Q9I4I2_PSEAE	2	2	2	>tr|Q9I4I2|Q9I4I2_PSEAE Ribonucleoside-diphosphate reductase subunit beta OS=Pseudomonas aeruginosa (strain ATCC 15692 / PAO1 / 1C / PRS 101 / LMG 12228) GN=nrdB PE=3 SV=1	1	2	2	2	6.5	6.5	6.5	47.386	415	415	0	14.935	9278400	4				254	407;1126	True;True	413;1137	737;738;2025	1368;1369;1370;3725	1368;3725
tr|Q9I4X1|Q9I4X1_PSEAE	tr|Q9I4X1|Q9I4X1_PSEAE	4	4	4	>tr|Q9I4X1|Q9I4X1_PSEAE PqsC OS=Pseudomonas aeruginosa (strain ATCC 15692 / PAO1 / 1C / PRS 101 / LMG 12228) GN=pqsC PE=1 SV=1	1	4	4	4	16.4	16.4	16.4	38.238	348	348	0	24.662	23517000	5				255	47;666;713;796	True;True;True;True	47;673;720;805	90;91;1217;1296;1448;1449	173;174;2241;2242;2408;2707;2708	173;2242;2408;2707
tr|Q9I4X2|Q9I4X2_PSEAE	tr|Q9I4X2|Q9I4X2_PSEAE	1	1	1	>tr|Q9I4X2|Q9I4X2_PSEAE PqsB OS=Pseudomonas aeruginosa (strain ATCC 15692 / PAO1 / 1C / PRS 101 / LMG 12228) GN=pqsB PE=1 SV=1	1	1	1	1	4.2	4.2	4.2	30.5	283	283	0	7.9393	3834800	1				256	568	TRUE	574	1040	1915	1915
tr|Q9I522|Q9I522_PSEAE	tr|Q9I522|Q9I522_PSEAE	1	1	1	>tr|Q9I522|Q9I522_PSEAE Lipopolysaccharide biosynthetic protein LpxO2 OS=Pseudomonas aeruginosa (strain ATCC 15692 / PAO1 / 1C / PRS 101 / LMG 12228) GN=lpxO2 PE=4 SV=1	1	1	1	1	4.2	4.2	4.2	35.759	312	312	0	6.3755	0	1				257	1071	TRUE	1082	1927	3558	3558
tr|Q9I5E3|Q9I5E3_PSEAE	tr|Q9I5E3|Q9I5E3_PSEAE	2	2	2	>tr|Q9I5E3|Q9I5E3_PSEAE Citrate synthase OS=Pseudomonas aeruginosa (strain ATCC 15692 / PAO1 / 1C / PRS 101 / LMG 12228) GN=prpC PE=3 SV=1	1	2	2	2	7.5	7.5	7.5	41.689	375	375	0	14.355	3161600	3				258	479;630	True;True	485;636	857;1155	1578;1579;2146	1578;2146
tr|Q9I5F6|Q9I5F6_PSEAE	tr|Q9I5F6|Q9I5F6_PSEAE	7	7	7	>tr|Q9I5F6|Q9I5F6_PSEAE Bifunctional protein PutA OS=Pseudomonas aeruginosa (strain ATCC 15692 / PAO1 / 1C / PRS 101 / LMG 12228) GN=putA PE=3 SV=1	1	7	7	7	7.9	7.9	7.9	115.63	1060	1060	0	62.627	33580000	15				259	167;699;1032;1064;1107;1117;1168	True;True;True;True;True;True;True	170;706;1043;1075;1118;1128;1179	302;1272;1273;1865;1866;1914;1986;1987;2008;2099;2100	567;2371;2372;2373;3434;3435;3535;3648;3649;3650;3685;3686;3839;3840;3841	567;2371;3434;3535;3649;3686;3839
tr|Q9I5U9|Q9I5U9_PSEAE	tr|Q9I5U9|Q9I5U9_PSEAE	16	16	16	>tr|Q9I5U9|Q9I5U9_PSEAE Uncharacterized protein OS=Pseudomonas aeruginosa (strain ATCC 15692 / PAO1 / 1C / PRS 101 / LMG 12228) GN=PA0588 PE=4 SV=1	1	16	16	16	29.5	29.5	29.5	73.722	640	640	0	129.95	174620000	50				260	108;203;557;628;641;645;656;717;733;755;793;902;959;1112;1153;1154	True;True;True;True;True;True;True;True;True;True;True;True;True;True;True;True	110;207;563;634;647;651;663;724;740;762;802;911;969;1123;1164;1165	205;206;370;371;1022;1150;1151;1152;1153;1170;1171;1177;1178;1199;1200;1302;1303;1328;1329;1365;1366;1444;1445;1621;1742;1743;1999;2000;2071;2072;2073;2074	404;405;736;737;738;1875;2136;2137;2138;2139;2140;2141;2142;2143;2144;2166;2167;2168;2169;2170;2171;2178;2179;2180;2181;2217;2218;2418;2419;2420;2421;2422;2423;2473;2474;2475;2530;2531;2532;2702;2703;3000;3001;3230;3231;3673;3674;3794;3795;3796;3797	404;738;1875;2143;2170;2179;2217;2419;2475;2530;2703;3001;3230;3674;3796;3797
tr|Q9I5Y8|Q9I5Y8_PSEAE	tr|Q9I5Y8|Q9I5Y8_PSEAE	2	2	2	>tr|Q9I5Y8|Q9I5Y8_PSEAE Transketolase OS=Pseudomonas aeruginosa (strain ATCC 15692 / PAO1 / 1C / PRS 101 / LMG 12228) GN=tktA PE=1 SV=1	1	2	2	2	5.7	5.7	5.7	72.219	665	665	0	12.326	6999500	3				261	109;289	True;True	111;293	207;532	406;1010;1011	406;1011
tr|Q9I612|Q9I612_PSEAE	tr|Q9I612|Q9I612_PSEAE	2	2	2	>tr|Q9I612|Q9I612_PSEAE Probable acyl-CoA dehydrogenase OS=Pseudomonas aeruginosa (strain ATCC 15692 / PAO1 / 1C / PRS 101 / LMG 12228) GN=PA0506 PE=3 SV=1	1	2	2	2	5.3	5.3	5.3	65.358	601	601	0	11.88	6038900	3				262	315;519	True;True	320;525	578;579;946	1095;1096;1097;1750	1097;1750
tr|Q9I659|Q9I659_PSEAE	tr|Q9I659|Q9I659_PSEAE	10	10	8	>tr|Q9I659|Q9I659_PSEAE Probable ClpA/B protease ATP binding subunit OS=Pseudomonas aeruginosa (strain ATCC 15692 / PAO1 / 1C / PRS 101 / LMG 12228) GN=PA0459 PE=4 SV=1	1	10	10	8	20.4	20.4	17.6	94.174	850	850	0	81.043	58151000	23				263	260;282;322;621;775;786;822;949;1076;1185	True;True;True;True;True;True;True;True;True;True	264;286;327;627;783;795;831;959;1087;1196	477;518;592;1140;1141;1401;1402;1433;1491;1492;1720;1934;1935;2131;2132	922;982;1120;2122;2123;2124;2125;2586;2587;2588;2687;2783;2784;2785;2786;2787;3189;3190;3566;3567;3568;3889;3890	922;982;1120;2122;2586;2687;2785;3189;3568;3889
tr|Q9I671|Q9I671_PSEAE	tr|Q9I671|Q9I671_PSEAE	5	5	5	>tr|Q9I671|Q9I671_PSEAE Glutaryl-CoA dehydrogenase OS=Pseudomonas aeruginosa (strain ATCC 15692 / PAO1 / 1C / PRS 101 / LMG 12228) GN=gcdH PE=3 SV=1	1	5	5	5	22.4	22.4	22.4	43.311	393	393	0	55.605	39924000	12				264	127;199;204;853;920	True;True;True;True;True	129;203;208;862;929	235;364;365;372;373;374;1543;1648	453;454;455;730;731;739;740;741;742;743;2881;3038	454;730;742;2881;3038
tr|Q9I672|Q9I672_PSEAE	tr|Q9I672|Q9I672_PSEAE	1	1	1	>tr|Q9I672|Q9I672_PSEAE Uncharacterized protein OS=Pseudomonas aeruginosa (strain ATCC 15692 / PAO1 / 1C / PRS 101 / LMG 12228) GN=PA0446 PE=4 SV=1	1	1	1	1	6.1	6.1	6.1	43.846	407	407	0	6.5694	484430	1				265	1072	TRUE	1083	1928	3559	3559
tr|Q9I687|Q9I687_PSEAE	tr|Q9I687|Q9I687_PSEAE	1	1	1	>tr|Q9I687|Q9I687_PSEAE Methylenetetrahydrofolate reductase OS=Pseudomonas aeruginosa (strain ATCC 15692 / PAO1 / 1C / PRS 101 / LMG 12228) GN=metF PE=3 SV=1	1	1	1	1	6.6	6.6	6.6	32.228	290	290	0.0042017	6.1507	3106200	1				266	613	TRUE	619	1125	2089	2089
tr|Q9I689|Q9I689_PSEAE	tr|Q9I689|Q9I689_PSEAE	1	1	1	>tr|Q9I689|Q9I689_PSEAE ATP-dependent RNA helicase RhlE OS=Pseudomonas aeruginosa (strain ATCC 15692 / PAO1 / 1C / PRS 101 / LMG 12228) GN=rhlE PE=3 SV=1	1	1	1	1	3.8	3.8	3.8	70.111	639	639	0.004065	5.8724	326340	4				267	164	TRUE	167	298;299	561;562;563;564	562
tr|Q9I6A0|Q9I6A0_PSEAE	tr|Q9I6A0|Q9I6A0_PSEAE	1	1	1	>tr|Q9I6A0|Q9I6A0_PSEAE Probable cystathionine gamma-lyase OS=Pseudomonas aeruginosa (strain ATCC 15692 / PAO1 / 1C / PRS 101 / LMG 12228) GN=PA0400 PE=3 SV=1	1	1	1	1	5.6	5.6	5.6	42.786	394	394	0	7.9685	1030800	1				268	603	TRUE	609	1105	2046	2046
tr|Q9I6H5|Q9I6H5_PSEAE	tr|Q9I6H5|Q9I6H5_PSEAE	4	4	4	>tr|Q9I6H5|Q9I6H5_PSEAE D-3-phosphoglycerate dehydrogenase OS=Pseudomonas aeruginosa (strain ATCC 15692 / PAO1 / 1C / PRS 101 / LMG 12228) GN=serA PE=3 SV=1	1	4	4	4	13.4	13.4	13.4	44.216	409	409	0	31.103	29178000	18				269	2;314;365;937	True;True;True;True	2;319;370;947	4;5;576;577;662;663;1694;1695	7;8;1092;1093;1094;1231;1232;1233;1234;3119;3120;3121;3122;3123;3124;3125;3126;3127	7;1093;1231;3119
tr|Q9I6J2|Q9I6J2_PSEAE	tr|Q9I6J2|Q9I6J2_PSEAE	3	3	3	>tr|Q9I6J2|Q9I6J2_PSEAE Putrescine aminotransferase OS=Pseudomonas aeruginosa (strain ATCC 15692 / PAO1 / 1C / PRS 101 / LMG 12228) GN=spuC PE=3 SV=1	1	3	3	3	9.6	9.6	9.6	50.452	456	456	0	17.168	14782000	5				270	233;266;1166	True;True;True	237;270;1177	431;488;2095;2096	846;943;944;3834;3835	846;943;3834
tr|Q9I6M3|Q9I6M3_PSEAE	tr|Q9I6M3|Q9I6M3_PSEAE	1	1	1	>tr|Q9I6M3|Q9I6M3_PSEAE Uncharacterized protein OS=Pseudomonas aeruginosa (strain ATCC 15692 / PAO1 / 1C / PRS 101 / LMG 12228) GN=PA0267 PE=4 SV=1	1	1	1	1	2	2	2	43.324	399	399	0.0075188	5.5121	157570000	1				271	596	TRUE	602	1087	1993	1993
tr|Q9I6Z1|Q9I6Z1_PSEAE	tr|Q9I6Z1|Q9I6Z1_PSEAE	4	4	4	>tr|Q9I6Z1|Q9I6Z1_PSEAE Uncharacterized protein OS=Pseudomonas aeruginosa (strain ATCC 15692 / PAO1 / 1C / PRS 101 / LMG 12228) GN=PA0141 PE=4 SV=1	1	4	4	4	15.8	15.8	15.8	34.463	298	298	0	30.387	32899000	10				272	756;906;1150;1189	True;True;True;True	763;915;1161;1200	1367;1368;1626;1627;2066;2067;2137;2138;2139	2533;2534;3008;3009;3789;3790;3897;3898;3899;3900;3901	2534;3009;3789;3899
tr|Q9I6Z3|Q9I6Z3_PSEAE	tr|Q9I6Z3|Q9I6Z3_PSEAE	5	5	5	>tr|Q9I6Z3|Q9I6Z3_PSEAE Alkyl hydroperoxide reductase subunit C OS=Pseudomonas aeruginosa (strain ATCC 15692 / PAO1 / 1C / PRS 101 / LMG 12228) GN=ahpC PE=4 SV=1	1	5	5	5	40.1	40.1	40.1	20.541	187	187	0	36.182	53321000	12				273	118;398;913;977;1013	True;True;True;True;True	120;403;922;987;1024	220;221;720;721;1637;1774;1775;1836;1837	425;426;427;428;1341;1342;1343;3022;3298;3299;3397;3398	425;1342;3022;3299;3398
tr|Q9I748|Q9I748_PSEAE	tr|Q9I748|Q9I748_PSEAE	3	3	3	>tr|Q9I748|Q9I748_PSEAE Uncharacterized protein OS=Pseudomonas aeruginosa (strain ATCC 15692 / PAO1 / 1C / PRS 101 / LMG 12228) GN=PA0084 PE=4 SV=1	1	3	3	3	10.2	10.2	10.2	55.771	498	498	0	20.465	20950000	7				274	29;459;1188	True;True;True	29;465;1199	56;57;825;826;2136	98;99;100;101;1535;1536;3896	98;1535;3896
tr|Q9I762|Q9I762_PSEAE	tr|Q9I762|Q9I762_PSEAE	1	1	1	>tr|Q9I762|Q9I762_PSEAE Uncharacterized protein OS=Pseudomonas aeruginosa (strain ATCC 15692 / PAO1 / 1C / PRS 101 / LMG 12228) GN=PA0070 PE=4 SV=1	1	1	1	1	3.3	3.3	3.3	31.716	304	304	0.0042553	6.2522	998620	1				275	468	TRUE	474	838	1551	1551

## Sheet: 4-1 Sheet1
Protein IDs-C4HSL (full)
REV__sp|Q9I383|SELD_PSEAE
REV__tr|Q9HWT4|Q9HWT4_PSEAE
REV__tr|Q9HXW2|Q9HXW2_PSEAE
sp|G3XD12|HCNC_PSEAE
sp|G3XD23|WBPB_PSEAE
sp|G3XD61|WBPI_PSEAE
sp|G3XD76|DAPD_PSEAE
sp|G3XD94|UGND_PSEAE
sp|O30508|ARUC_PSEAE
sp|O52759|RS4_PSEAE
sp|O52760|RPOA_PSEAE
sp|O52761|RL17_PSEAE
sp|O52762|CATA_PSEAE
sp|O54439|ACP1_PSEAE
sp|O68822|AMPA_PSEAE
sp|O69754|PHZF_PSEAE
sp|O82850|RS2_PSEAE
sp|O82851|EFTS_PSEAE
sp|O86428|ILVE_PSEAE
sp|O87125|CHEB1_PSEAE
sp|P04739|FMPO_PSEAE
sp|P07345|TRPB_PSEAE
sp|P08280|RECA_PSEAE
sp|P08308|OTCC_PSEAE
sp|P09591|EFTU_PSEAE
sp|P11221|OPRI_PSEAE
sp|P11436|AMIE_PSEAE
sp|P13794|PORF_PSEAE
sp|P13981|ARCA_PSEAE
sp|P13982|ARCC_PSEAE
sp|P14165|CISY_PSEAE
sp|P15276|ALGP_PSEAE
sp|P20582|PQSD_PSEAE
sp|P26276|ALGC_PSEAE
sp|P29363|THRC_PSEAE
sp|P29365|DHOM_PSEAE
sp|P30718|CH60_PSEAE
sp|P37798|ACCC_PSEAE
sp|P37799|BCCP_PSEAE
sp|P38100|CARB_PSEAE
sp|P43336|PHHC_PSEAE
sp|P47203|FTSA_PSEAE
sp|P47204|FTSZ_PSEAE
sp|P48247|GSA_PSEAE
sp|P48372|GYRA_PSEAE
sp|P50987|ARLY_PSEAE
sp|P53593|SUCC_PSEAE
sp|P53641|SODF_PSEAE
sp|P57112|STHA_PSEAE
sp|P72173|AAT_PSEAE
sp|P77915|HEMN_PSEAE
sp|Q51342|PUR1_PSEAE
sp|Q51390|GLPK2_PSEAE
sp|Q51422|SYDND_PSEAE
sp|Q51561|RPOB_PSEAE
sp|Q51567|SUCD_PSEAE
sp|Q59636|NDK_PSEAE
sp|Q59637|ODP1_PSEAE
sp|Q59638|ODP2_PSEAE
sp|Q59653|PYRB_PSEAE
sp|Q9HT16|ATPF_PSEAE
sp|Q9HT18|ATPA_PSEAE
sp|Q9HT19|ATPG_PSEAE
sp|Q9HT20|ATPB_PSEAE
sp|Q9HT95|ATSE4_PSEAE
sp|Q9HTD7|ASPA_PSEAE
sp|Q9HTF1|LTAE_PSEAE
sp|Q9HTN8|RL28_PSEAE
sp|Q9HTQ0|DADA1_PSEAE
sp|Q9HTQ2|ALR2_PSEAE
sp|Q9HTV1|RHO_PSEAE
sp|Q9HTZ7|PCKA_PSEAE
sp|Q9HU15|FABY_PSEAE
sp|Q9HU21|RMLC_PSEAE
sp|Q9HU65|GLNA_PSEAE
sp|Q9HU83|HUTU_PSEAE
sp|Q9HUC8|SYR_PSEAE
sp|Q9HUD0|RL31_PSEAE
sp|Q9HUM0|HFQ_PSEAE
sp|Q9HUM6|PURA_PSEAE
sp|Q9HV43|DNAK_PSEAE
sp|Q9HV50|GLMM_PSEAE
sp|Q9HV55|IF2_PSEAE
sp|Q9HV59|PNP_PSEAE
sp|Q9HVA2|ILVC_PSEAE
sp|Q9HVC4|RL25_PSEAE
sp|Q9HVC5|KPRS_PSEAE
sp|Q9HVF1|MQO2_PSEAE
sp|Q9HVI7|GLYA3_PSEAE;sp|Q9I138|GLYA2_PSEAE
sp|Q9HVM4|SYI_PSEAE
sp|Q9HVN5|CLPB_PSEAE
sp|Q9HVT8|GATA_PSEAE
sp|Q9HVW7|MURA_PSEAE
sp|Q9HVX6|SYW_PSEAE
sp|Q9HW02|MURC_PSEAE
sp|Q9HW04|ARGJ_PSEAE
sp|Q9HWC5|RL11_PSEAE
sp|Q9HWC9|RPOC_PSEAE
sp|Q9HWD0|RS12_PSEAE
sp|Q9HWD2|EFG1_PSEAE;sp|Q9I244|EFG2_PSEAE
sp|Q9HWD5|RL3_PSEAE
sp|Q9HWD8|RL2_PSEAE
sp|Q9HWE0|RL22_PSEAE
sp|Q9HWE1|RS3_PSEAE
sp|Q9HWE5|RL14_PSEAE
sp|Q9HWE8|RS14_PSEAE
sp|Q9HWE9|RS8_PSEAE
sp|Q9HWF1|RL18_PSEAE
sp|Q9HWF2|RS5_PSEAE
sp|Q9HWF3|RL30_PSEAE
sp|Q9HWF7|RS13_PSEAE
sp|Q9HWF8|RS11_PSEAE
sp|Q9HWG0|UVRA_PSEAE
sp|Q9HWZ6|IPYR_PSEAE
sp|Q9HX33|SYL_PSEAE
sp|Q9HXM6|GUAA_PSEAE
sp|Q9HXN2|PUR4_PSEAE
sp|Q9HXZ2|ACCA_PSEAE
sp|Q9HXZ4|PYRG_PSEAE
sp|Q9HXZ5|ENO_PSEAE
sp|Q9HY84|ASSY_PSEAE
sp|Q9HYC7|SYM_PSEAE
sp|Q9HYD5|MAO1_PSEAE
sp|Q9HYL2|NOSZ_PSEAE
sp|Q9HYQ8|HLDD_PSEAE
sp|Q9HYR2|FABH_PSEAE
sp|Q9HZ66|SERC_PSEAE
sp|Q9HZ71|RS1_PSEAE
sp|Q9HZ76|WBPE_PSEAE
sp|Q9HZA7|ACCD_PSEAE
sp|Q9HZE0|DHE2_PSEAE
sp|Q9HZJ2|FADB_PSEAE
sp|Q9HZJ3|FADA_PSEAE
sp|Q9HZP5|ETFD_PSEAE
sp|Q9HZP6|ETFB_PSEAE
sp|Q9HZZ2|EFP_PSEAE
sp|Q9I099|SYT_PSEAE
sp|Q9I0J6|NUOG_PSEAE
sp|Q9I0J7|NUOF_PSEAE
sp|Q9I0J9|NUOCD_PSEAE
sp|Q9I0K0|NUOB_PSEAE
sp|Q9I0K4|ACEA_PSEAE
sp|Q9I1L9|DLDH1_PSEAE
sp|Q9I1M1|ODBB_PSEAE
sp|Q9I1M2|ODBA_PSEAE
sp|Q9I1S2|HCNB_PSEAE
sp|Q9I291|GALU_PSEAE
sp|Q9I2A8|ATOB_PSEAE
sp|Q9I2U0|CLPX_PSEAE
sp|Q9I2U8|SYQ_PSEAE
sp|Q9I2V5|ACNB_PSEAE
sp|Q9I383|SELD_PSEAE
sp|Q9I3D1|DLDH2_PSEAE
sp|Q9I3D2|ODO2_PSEAE
sp|Q9I3F5|ACNA_PSEAE
sp|Q9I4W0|PUR7_PSEAE
sp|Q9I4Z4|PAL_PSEAE
sp|Q9I502|SYP_PSEAE
sp|Q9I513|PUR5_PSEAE
sp|Q9I553|SYA_PSEAE
sp|Q9I558|ACSA1_PSEAE;sp|Q9HV66|ACSA2_PSEAE
sp|Q9I576|HPPD_PSEAE
sp|Q9I587|FUMC2_PSEAE
sp|Q9I5A4|ACKA_PSEAE
sp|Q9I5A5|PTA_PSEAE
sp|Q9I5Q9|ARGC_PSEAE
sp|Q9I5Y1|ALF_PSEAE
sp|Q9I5Y4|PGK_PSEAE
sp|Q9I5Z0|METK_PSEAE
sp|Q9I636|MASZ_PSEAE
sp|Q9I685|SAHH_PSEAE
sp|Q9I6E0|ILVD_PSEAE
sp|Q9I6M4|DAVT_PSEAE
sp|Q9I6M5|DAVD_PSEAE
sp|Q9I702|BAUC_PSEAE
sp|Q9I742|CLPV1_PSEAE
sp|Q9I747|HCP1_PSEAE
sp|Q9I7B8|SYGB_PSEAE
sp|Q9I7C2|GYRB_PSEAE
sp|Q9I7C4|DPO3B_PSEAE
sp|Q9I7C5|DNAA_PSEAE
sp|Q9LCT3|SECA_PSEAE
sp|Q9LCT6|DDLB_PSEAE
sp|Q9S508|PHZB2_PSEAE;sp|O69753|PHZB1_PSEAE
sp|Q9S646|PPK_PSEAE
sp|Q9ZFK4|KDSA_PSEAE
tr|G3XCT6|G3XCT6_PSEAE
tr|G3XCV0|G3XCV0_PSEAE
tr|G3XCZ6|G3XCZ6_PSEAE
tr|G3XD74|G3XD74_PSEAE
tr|G3XDA2|G3XDA2_PSEAE
tr|Q9HT66|Q9HT66_PSEAE
tr|Q9HTD1|Q9HTD1_PSEAE
tr|Q9HTD9|Q9HTD9_PSEAE
tr|Q9HTL4|Q9HTL4_PSEAE
tr|Q9HTP2|Q9HTP2_PSEAE
tr|Q9HU24|Q9HU24_PSEAE
tr|Q9HUD3|Q9HUD3_PSEAE
tr|Q9HUE2|Q9HUE2_PSEAE
tr|Q9HUE4|Q9HUE4_PSEAE
tr|Q9HUG0|Q9HUG0_PSEAE
tr|Q9HV54|Q9HV54_PSEAE
tr|Q9HV96|Q9HV96_PSEAE
tr|Q9HVA0|Q9HVA0_PSEAE
tr|Q9HVD5|Q9HVD5_PSEAE
tr|Q9HVJ1|Q9HVJ1_PSEAE
tr|Q9HVS8|Q9HVS8_PSEAE
tr|Q9HVU0|Q9HVU0_PSEAE
tr|Q9HVY4|Q9HVY4_PSEAE
tr|Q9HVY5|Q9HVY5_PSEAE
tr|Q9HVY6|Q9HVY6_PSEAE
tr|Q9HW15|Q9HW15_PSEAE
tr|Q9HW32|Q9HW32_PSEAE
tr|Q9HW49|Q9HW49_PSEAE
tr|Q9HW68|Q9HW68_PSEAE
tr|Q9HW72|Q9HW72_PSEAE
tr|Q9HWG9|Q9HWG9_PSEAE
tr|Q9HWP8|Q9HWP8_PSEAE
tr|Q9HWQ0|Q9HWQ0_PSEAE
tr|Q9HX05|Q9HX05_PSEAE;tr|Q9I2C4|Q9I2C4_PSEAE
tr|Q9HX44|Q9HX44_PSEAE
tr|Q9HXM5|Q9HXM5_PSEAE
tr|Q9HY01|Q9HY01_PSEAE
tr|Q9HY12|Q9HY12_PSEAE
tr|Q9HY13|Q9HY13_PSEAE
tr|Q9HY77|Q9HY77_PSEAE
tr|Q9HY79|Q9HY79_PSEAE
tr|Q9HY81|Q9HY81_PSEAE
tr|Q9HYC8|Q9HYC8_PSEAE
tr|Q9HYR4|Q9HYR4_PSEAE
tr|Q9HYR5|Q9HYR5_PSEAE
tr|Q9HYR6|Q9HYR6_PSEAE
tr|Q9HYR7|Q9HYR7_PSEAE
tr|Q9HYR8|Q9HYR8_PSEAE
tr|Q9HYT5|Q9HYT5_PSEAE
tr|Q9HYZ6|Q9HYZ6_PSEAE
tr|Q9HZ78|Q9HZ78_PSEAE
tr|Q9HZC5|Q9HZC5_PSEAE
tr|Q9HZK3|Q9HZK3_PSEAE
tr|Q9HZK4|Q9HZK4_PSEAE
tr|Q9I028|Q9I028_PSEAE
tr|Q9I0L4|Q9I0L4_PSEAE
tr|Q9I0L5|Q9I0L5_PSEAE
tr|Q9I0M2|Q9I0M2_PSEAE
tr|Q9I0T1|Q9I0T1_PSEAE
tr|Q9I0T2|Q9I0T2_PSEAE
tr|Q9I1E7|Q9I1E7_PSEAE
tr|Q9I1H3|Q9I1H3_PSEAE
tr|Q9I1H5|Q9I1H5_PSEAE
tr|Q9I1I6|Q9I1I6_PSEAE
tr|Q9I1N7|Q9I1N7_PSEAE
tr|Q9I1S0|Q9I1S0_PSEAE
tr|Q9I1Z6|Q9I1Z6_PSEAE
tr|Q9I246|Q9I246_PSEAE
tr|Q9I296|Q9I296_PSEAE
tr|Q9I297|Q9I297_PSEAE
tr|Q9I299|Q9I299_PSEAE
tr|Q9I2A2|Q9I2A2_PSEAE
tr|Q9I2A9|Q9I2A9_PSEAE
tr|Q9I2V3|Q9I2V3_PSEAE
tr|Q9I2W9|Q9I2W9_PSEAE
tr|Q9I2Y5|Q9I2Y5_PSEAE
tr|Q9I2Z1|Q9I2Z1_PSEAE
tr|Q9I3B2|Q9I3B2_PSEAE
tr|Q9I3D3|Q9I3D3_PSEAE
tr|Q9I3D4|Q9I3D4_PSEAE
tr|Q9I3D5|Q9I3D5_PSEAE
tr|Q9I3G0|Q9I3G0_PSEAE
tr|Q9I3G1|Q9I3G1_PSEAE
tr|Q9I3G2|Q9I3G2_PSEAE
tr|Q9I3G3|Q9I3G3_PSEAE
tr|Q9I3G6|Q9I3G6_PSEAE
tr|Q9I3J1|Q9I3J1_PSEAE
tr|Q9I3X2|Q9I3X2_PSEAE
tr|Q9I400|Q9I400_PSEAE
tr|Q9I4I1|Q9I4I1_PSEAE
tr|Q9I4I2|Q9I4I2_PSEAE
tr|Q9I4W5|Q9I4W5_PSEAE
tr|Q9I4X1|Q9I4X1_PSEAE
tr|Q9I4X2|Q9I4X2_PSEAE
tr|Q9I5F5|Q9I5F5_PSEAE
tr|Q9I5F6|Q9I5F6_PSEAE
tr|Q9I5H0|Q9I5H0_PSEAE
tr|Q9I5I5|Q9I5I5_PSEAE
tr|Q9I5U9|Q9I5U9_PSEAE
tr|Q9I5Y8|Q9I5Y8_PSEAE
tr|Q9I612|Q9I612_PSEAE
tr|Q9I659|Q9I659_PSEAE
tr|Q9I671|Q9I671_PSEAE
tr|Q9I672|Q9I672_PSEAE
tr|Q9I687|Q9I687_PSEAE
tr|Q9I688|Q9I688_PSEAE
tr|Q9I689|Q9I689_PSEAE
tr|Q9I696|Q9I696_PSEAE
tr|Q9I6A0|Q9I6A0_PSEAE
tr|Q9I6H5|Q9I6H5_PSEAE
tr|Q9I6J2|Q9I6J2_PSEAE
tr|Q9I6Z1|Q9I6Z1_PSEAE
tr|Q9I6Z3|Q9I6Z3_PSEAE
tr|Q9I748|Q9I748_PSEAE
tr|Q9I762|Q9I762_PSEAE
tr|Q9I765|Q9I765_PSEAE
tr|Q9I7A7|Q9I7A7_PSEAE
Probe 12 (subtracted)
sp|G3XD67|HCNA_PSEAE
sp|O69753|PHZB1_PSEAE
sp|Q9HT21|ATPE_PSEAE
sp|Q9HU56|SECB_PSEAE
sp|Q9HUC0|UBIE_PSEAE
sp|Q9HUM9|RS6_PSEAE
sp|Q9HUN0|RS18_PSEAE
sp|Q9HW11|Y4395_PSEAE
sp|Q9HWE4|RS17_PSEAE
sp|Q9I047|TAL_PSEAE
sp|Q9I0A0|IF3_PSEAE
sp|Q9I0A2|RL20_PSEAE
sp|Q9I0J4|NUOI_PSEAE
sp|Q9I0J5|NUOH_PSEAE
sp|Q9I0K9|PUR8_PSEAE
sp|Q9I1Z9|Y2116_PSEAE
sp|Q9I558|ACSA1_PSEAE
sp|Q9I5V8|RS21_PSEAE
sp|Q9S508|PHZB2_PSEAE
sp|Q9X2T1|THIO_PSEAE
sp|Q9XCL6|SYE_PSEAE
tr|Q9HT36|Q9HT36_PSEAE
tr|Q9HTB5|Q9HTB5_PSEAE
tr|Q9HTD8|Q9HTD8_PSEAE
tr|Q9HTU9|Q9HTU9_PSEAE
tr|Q9HUZ3|Q9HUZ3_PSEAE
tr|Q9HVF9|Q9HVF9_PSEAE
tr|Q9HVM0|Q9HVM0_PSEAE
tr|Q9HW80|Q9HW80_PSEAE
tr|Q9HX12|Q9HX12_PSEAE
tr|Q9I056|Q9I056_PSEAE
tr|Q9I1E8|Q9I1E8_PSEAE
tr|Q9I2R2|Q9I2R2_PSEAE
tr|Q9I363|Q9I363_PSEAE
tr|Q9I3G1|Q9I3G1_PSEAE;tr|Q9I3G4|Q9I3G4_PSEAE
tr|Q9I3H0|Q9I3H0_PSEAE
tr|Q9I3L4|Q9I3L4_PSEAE
tr|Q9I522|Q9I522_PSEAE
tr|Q9I5E3|Q9I5E3_PSEAE
tr|Q9I6M3|Q9I6M3_PSEAE

## Sheet: 4-1 Sheet2
Protein IDs-Probe 12 (subtracted)	Protein IDs-Probe 12 (full)			Fasta headers	Number of proteins	Peptides	Razor + unique peptides
sp|G3XD67|HCNA_PSEAE	REV__sp|Q9I383|SELD_PSEAE			>sp|Q9I383|SELD_PSEAE Selenide, water dikinase OS=Pseudomonas aeruginosa (strain ATCC 15692 / PAO1 / 1C / PRS 101 / LMG 12228) GN=selD PE=3 SV=1	1	1	1
sp|O69753|PHZB1_PSEAE	REV__tr|Q9HXW2|Q9HXW2_PSEAE			>tr|Q9HXW2|Q9HXW2_PSEAE Probable transcriptional regulator OS=Pseudomonas aeruginosa (strain ATCC 15692 / PAO1 / 1C / PRS 101 / LMG 12228) GN=PA3678 PE=4 SV=1	1	1	1
sp|Q9HT21|ATPE_PSEAE	sp|G3XD12|HCNC_PSEAE			>sp|G3XD12|HCNC_PSEAE Hydrogen cyanide synthase subunit HcnC OS=Pseudomonas aeruginosa (strain ATCC 15692 / PAO1 / 1C / PRS 101 / LMG 12228) GN=hcnC PE=1 SV=1	1	1	1
sp|Q9HU56|SECB_PSEAE	sp|G3XD23|WBPB_PSEAE			>sp|G3XD23|WBPB_PSEAE UDP-N-acetyl-2-amino-2-deoxy-D-glucuronate oxidase OS=Pseudomonas aeruginosa (strain ATCC 15692 / PAO1 / 1C / PRS 101 / LMG 12228) GN=wbpB PE=1 SV=1	1	5	5
sp|Q9HUC0|UBIE_PSEAE	sp|G3XD61|WBPI_PSEAE			>sp|G3XD61|WBPI_PSEAE UDP-2,3-diacetamido-2,3-dideoxy-D-glucuronate 2-epimerase OS=Pseudomonas aeruginosa (strain ATCC 15692 / PAO1 / 1C / PRS 101 / LMG 12228) GN=wbpI PE=1 SV=1	1	7	7
sp|Q9HUM9|RS6_PSEAE	sp|G3XD67|HCNA_PSEAE			>sp|G3XD67|HCNA_PSEAE Hydrogen cyanide synthase subunit HcnA OS=Pseudomonas aeruginosa (strain ATCC 15692 / PAO1 / 1C / PRS 101 / LMG 12228) GN=hcnA PE=1 SV=1	1	1	1
sp|Q9HUN0|RS18_PSEAE	sp|G3XD76|DAPD_PSEAE			>sp|G3XD76|DAPD_PSEAE 2,3,4,5-tetrahydropyridine-2,6-dicarboxylate N-succinyltransferase OS=Pseudomonas aeruginosa (strain ATCC 15692 / PAO1 / 1C / PRS 101 / LMG 12228) GN=dapD PE=1 SV=1	1	1	1
sp|Q9HW11|Y4395_PSEAE	sp|G3XD94|UGND_PSEAE			>sp|G3XD94|UGND_PSEAE UDP-N-acetyl-D-glucosamine 6-dehydrogenase OS=Pseudomonas aeruginosa (strain ATCC 15692 / PAO1 / 1C / PRS 101 / LMG 12228) GN=wbpA PE=1 SV=1	1	9	9
sp|Q9HWE4|RS17_PSEAE	sp|O30508|ARUC_PSEAE			>sp|O30508|ARUC_PSEAE Succinylornithine transaminase/acetylornithine aminotransferase OS=Pseudomonas aeruginosa (strain ATCC 15692 / PAO1 / 1C / PRS 101 / LMG 12228) GN=aruC PE=1 SV=2	1	3	3
sp|Q9I047|TAL_PSEAE	sp|O52759|RS4_PSEAE			>sp|O52759|RS4_PSEAE 30S ribosomal protein S4 OS=Pseudomonas aeruginosa (strain ATCC 15692 / PAO1 / 1C / PRS 101 / LMG 12228) GN=rpsD PE=3 SV=2	1	5	5
sp|Q9I0A0|IF3_PSEAE	sp|O52760|RPOA_PSEAE			>sp|O52760|RPOA_PSEAE DNA-directed RNA polymerase subunit alpha OS=Pseudomonas aeruginosa (strain ATCC 15692 / PAO1 / 1C / PRS 101 / LMG 12228) GN=rpoA PE=3 SV=2	1	7	7
sp|Q9I0A2|RL20_PSEAE	sp|O52761|RL17_PSEAE			>sp|O52761|RL17_PSEAE 50S ribosomal protein L17 OS=Pseudomonas aeruginosa (strain ATCC 15692 / PAO1 / 1C / PRS 101 / LMG 12228) GN=rplQ PE=3 SV=1	1	2	2
sp|Q9I0J4|NUOI_PSEAE	sp|O52762|CATA_PSEAE			>sp|O52762|CATA_PSEAE Catalase OS=Pseudomonas aeruginosa (strain ATCC 15692 / PAO1 / 1C / PRS 101 / LMG 12228) GN=katA PE=1 SV=1	1	11	11
sp|Q9I0J5|NUOH_PSEAE	sp|O54439|ACP1_PSEAE			>sp|O54439|ACP1_PSEAE Acyl carrier protein 1 OS=Pseudomonas aeruginosa (strain ATCC 15692 / PAO1 / 1C / PRS 101 / LMG 12228) GN=acpP1 PE=3 SV=4	1	3	3
sp|Q9I0K9|PUR8_PSEAE	sp|O68822|AMPA_PSEAE			>sp|O68822|AMPA_PSEAE Cytosol aminopeptidase OS=Pseudomonas aeruginosa (strain ATCC 15692 / PAO1 / 1C / PRS 101 / LMG 12228) GN=pepA PE=3 SV=1	1	16	16
sp|Q9I1Z9|Y2116_PSEAE	sp|O69753|PHZB1_PSEAE			>sp|O69753|PHZB1_PSEAE Phenazine biosynthesis protein PhzB 1 OS=Pseudomonas aeruginosa (strain ATCC 15692 / PAO1 / 1C / PRS 101 / LMG 12228) GN=phzB1 PE=3 SV=1	1	4	1
sp|Q9I558|ACSA1_PSEAE	sp|O69754|PHZF_PSEAE			>sp|O69754|PHZF_PSEAE Trans-2,3-dihydro-3-hydroxyanthranilate isomerase OS=Pseudomonas aeruginosa (strain ATCC 15692 / PAO1 / 1C / PRS 101 / LMG 12228) GN=phzF1 PE=3 SV=2	1	2	2
sp|Q9I5V8|RS21_PSEAE	sp|O82850|RS2_PSEAE			>sp|O82850|RS2_PSEAE 30S ribosomal protein S2 OS=Pseudomonas aeruginosa (strain ATCC 15692 / PAO1 / 1C / PRS 101 / LMG 12228) GN=rpsB PE=3 SV=2	1	3	3
sp|Q9S508|PHZB2_PSEAE	sp|O82851|EFTS_PSEAE			>sp|O82851|EFTS_PSEAE Elongation factor Ts OS=Pseudomonas aeruginosa (strain ATCC 15692 / PAO1 / 1C / PRS 101 / LMG 12228) GN=tsf PE=3 SV=1	1	5	5
sp|Q9X2T1|THIO_PSEAE	sp|O86428|ILVE_PSEAE			>sp|O86428|ILVE_PSEAE Branched-chain-amino-acid aminotransferase OS=Pseudomonas aeruginosa (strain ATCC 15692 / PAO1 / 1C / PRS 101 / LMG 12228) GN=ilvE PE=1 SV=2	1	4	4
sp|Q9XCL6|SYE_PSEAE	sp|O87125|CHEB1_PSEAE			>sp|O87125|CHEB1_PSEAE Chemotaxis response regulator protein-glutamate methylesterase of group 1 operon OS=Pseudomonas aeruginosa (strain ATCC 15692 / PAO1 / 1C / PRS 101 / LMG 12228) GN=cheB1 PE=1 SV=2	1	2	2
tr|Q9HT36|Q9HT36_PSEAE	sp|P04739|FMPO_PSEAE			>sp|P04739|FMPO_PSEAE Fimbrial protein OS=Pseudomonas aeruginosa (strain ATCC 15692 / PAO1 / 1C / PRS 101 / LMG 12228) GN=pilA PE=1 SV=1	1	3	3
tr|Q9HTB5|Q9HTB5_PSEAE	sp|P08280|RECA_PSEAE			>sp|P08280|RECA_PSEAE Protein RecA OS=Pseudomonas aeruginosa (strain ATCC 15692 / PAO1 / 1C / PRS 101 / LMG 12228) GN=recA PE=3 SV=1	1	1	1
tr|Q9HTD8|Q9HTD8_PSEAE	sp|P08308|OTCC_PSEAE			>sp|P08308|OTCC_PSEAE Ornithine carbamoyltransferase, catabolic OS=Pseudomonas aeruginosa (strain ATCC 15692 / PAO1 / 1C / PRS 101 / LMG 12228) GN=arcB PE=1 SV=3	1	11	11
tr|Q9HTU9|Q9HTU9_PSEAE	sp|P09591|EFTU_PSEAE			>sp|P09591|EFTU_PSEAE Elongation factor Tu OS=Pseudomonas aeruginosa (strain ATCC 15692 / PAO1 / 1C / PRS 101 / LMG 12228) GN=tufA PE=1 SV=2	1	27	27
tr|Q9HUZ3|Q9HUZ3_PSEAE	sp|P11221|OPRI_PSEAE			>sp|P11221|OPRI_PSEAE Major outer membrane lipoprotein OS=Pseudomonas aeruginosa (strain ATCC 15692 / PAO1 / 1C / PRS 101 / LMG 12228) GN=oprI PE=3 SV=1	1	6	6
tr|Q9HVF9|Q9HVF9_PSEAE	sp|P13794|PORF_PSEAE			>sp|P13794|PORF_PSEAE Outer membrane porin F OS=Pseudomonas aeruginosa (strain ATCC 15692 / PAO1 / 1C / PRS 101 / LMG 12228) GN=oprF PE=1 SV=1	1	8	8
tr|Q9HVM0|Q9HVM0_PSEAE	sp|P13981|ARCA_PSEAE			>sp|P13981|ARCA_PSEAE Arginine deiminase OS=Pseudomonas aeruginosa (strain ATCC 15692 / PAO1 / 1C / PRS 101 / LMG 12228) GN=arcA PE=1 SV=2	1	29	29
tr|Q9HW80|Q9HW80_PSEAE	sp|P13982|ARCC_PSEAE			>sp|P13982|ARCC_PSEAE Carbamate kinase OS=Pseudomonas aeruginosa (strain ATCC 15692 / PAO1 / 1C / PRS 101 / LMG 12228) GN=arcC PE=3 SV=1	1	3	3
tr|Q9HX12|Q9HX12_PSEAE	sp|P14165|CISY_PSEAE			>sp|P14165|CISY_PSEAE Citrate synthase OS=Pseudomonas aeruginosa (strain ATCC 15692 / PAO1 / 1C / PRS 101 / LMG 12228) GN=gltA PE=3 SV=2	1	6	6
tr|Q9I056|Q9I056_PSEAE	sp|P15276|ALGP_PSEAE			>sp|P15276|ALGP_PSEAE Transcriptional regulatory protein AlgP OS=Pseudomonas aeruginosa (strain ATCC 15692 / PAO1 / 1C / PRS 101 / LMG 12228) GN=algP PE=4 SV=2	1	1	1
tr|Q9I1E8|Q9I1E8_PSEAE	sp|P20582|PQSD_PSEAE			>sp|P20582|PQSD_PSEAE 2-heptyl-4(1H)-quinolone synthase PqsD OS=Pseudomonas aeruginosa (strain ATCC 15692 / PAO1 / 1C / PRS 101 / LMG 12228) GN=pqsD PE=1 SV=2	1	1	1
tr|Q9I2R2|Q9I2R2_PSEAE	sp|P29363|THRC_PSEAE			>sp|P29363|THRC_PSEAE Threonine synthase OS=Pseudomonas aeruginosa (strain ATCC 15692 / PAO1 / 1C / PRS 101 / LMG 12228) GN=thrC PE=3 SV=3	1	1	1
tr|Q9I363|Q9I363_PSEAE	sp|P30718|CH60_PSEAE			>sp|P30718|CH60_PSEAE 60 kDa chaperonin OS=Pseudomonas aeruginosa (strain ATCC 15692 / PAO1 / 1C / PRS 101 / LMG 12228) GN=groL PE=1 SV=3	1	31	31
tr|Q9I3G1|Q9I3G1_PSEAE;tr|Q9I3G4|Q9I3G4_PSEAE	sp|P37798|ACCC_PSEAE			>sp|P37798|ACCC_PSEAE Biotin carboxylase OS=Pseudomonas aeruginosa (strain ATCC 15692 / PAO1 / 1C / PRS 101 / LMG 12228) GN=accC PE=1 SV=1	1	7	7
tr|Q9I3H0|Q9I3H0_PSEAE	sp|P37799|BCCP_PSEAE			>sp|P37799|BCCP_PSEAE Biotin carboxyl carrier protein of acetyl-CoA carboxylase OS=Pseudomonas aeruginosa (strain ATCC 15692 / PAO1 / 1C / PRS 101 / LMG 12228) GN=accB PE=3 SV=1	1	7	7
tr|Q9I3L4|Q9I3L4_PSEAE	sp|P38100|CARB_PSEAE			>sp|P38100|CARB_PSEAE Carbamoyl-phosphate synthase large chain OS=Pseudomonas aeruginosa (strain ATCC 15692 / PAO1 / 1C / PRS 101 / LMG 12228) GN=carB PE=3 SV=3	1	4	4
tr|Q9I522|Q9I522_PSEAE	sp|P43336|PHHC_PSEAE			>sp|P43336|PHHC_PSEAE Aromatic-amino-acid aminotransferase OS=Pseudomonas aeruginosa (strain ATCC 15692 / PAO1 / 1C / PRS 101 / LMG 12228) GN=phhC PE=3 SV=2	1	3	3
tr|Q9I5E3|Q9I5E3_PSEAE	sp|P47203|FTSA_PSEAE			>sp|P47203|FTSA_PSEAE Cell division protein FtsA OS=Pseudomonas aeruginosa (strain ATCC 15692 / PAO1 / 1C / PRS 101 / LMG 12228) GN=ftsA PE=3 SV=2	1	2	2
tr|Q9I6M3|Q9I6M3_PSEAE	sp|P47204|FTSZ_PSEAE			>sp|P47204|FTSZ_PSEAE Cell division protein FtsZ OS=Pseudomonas aeruginosa (strain ATCC 15692 / PAO1 / 1C / PRS 101 / LMG 12228) GN=ftsZ PE=1 SV=2	1	4	4
	sp|P48247|GSA_PSEAE			>sp|P48247|GSA_PSEAE Glutamate-1-semialdehyde 2,1-aminomutase OS=Pseudomonas aeruginosa (strain ATCC 15692 / PAO1 / 1C / PRS 101 / LMG 12228) GN=hemL PE=1 SV=2	1	4	4
	sp|P50987|ARLY_PSEAE			>sp|P50987|ARLY_PSEAE Argininosuccinate lyase OS=Pseudomonas aeruginosa (strain ATCC 15692 / PAO1 / 1C / PRS 101 / LMG 12228) GN=argH PE=3 SV=2	1	1	1
	sp|P53593|SUCC_PSEAE			>sp|P53593|SUCC_PSEAE Succinyl-CoA ligase [ADP-forming] subunit beta OS=Pseudomonas aeruginosa (strain ATCC 15692 / PAO1 / 1C / PRS 101 / LMG 12228) GN=sucC PE=3 SV=2	1	15	15
	sp|P53641|SODF_PSEAE			>sp|P53641|SODF_PSEAE Superoxide dismutase [Fe] OS=Pseudomonas aeruginosa (strain ATCC 15692 / PAO1 / 1C / PRS 101 / LMG 12228) GN=sodB PE=3 SV=3	1	4	4
	sp|P57112|STHA_PSEAE			>sp|P57112|STHA_PSEAE Soluble pyridine nucleotide transhydrogenase OS=Pseudomonas aeruginosa (strain ATCC 15692 / PAO1 / 1C / PRS 101 / LMG 12228) GN=sthA PE=1 SV=2	1	3	3
	sp|P72173|AAT_PSEAE			>sp|P72173|AAT_PSEAE Aspartate aminotransferase OS=Pseudomonas aeruginosa (strain ATCC 15692 / PAO1 / 1C / PRS 101 / LMG 12228) GN=aspC PE=3 SV=2	1	7	7
	sp|P77915|HEMN_PSEAE			>sp|P77915|HEMN_PSEAE Oxygen-independent coproporphyrinogen-III oxidase OS=Pseudomonas aeruginosa (strain ATCC 15692 / PAO1 / 1C / PRS 101 / LMG 12228) GN=hemN PE=2 SV=2	1	3	3
	sp|Q51342|PUR1_PSEAE			>sp|Q51342|PUR1_PSEAE Amidophosphoribosyltransferase OS=Pseudomonas aeruginosa (strain ATCC 15692 / PAO1 / 1C / PRS 101 / LMG 12228) GN=purF PE=3 SV=3	1	3	3
	sp|Q51422|SYDND_PSEAE			>sp|Q51422|SYDND_PSEAE Aspartate--tRNA(Asp/Asn) ligase OS=Pseudomonas aeruginosa (strain ATCC 15692 / PAO1 / 1C / PRS 101 / LMG 12228) GN=aspS PE=1 SV=2	1	6	6
	sp|Q51561|RPOB_PSEAE			>sp|Q51561|RPOB_PSEAE DNA-directed RNA polymerase subunit beta OS=Pseudomonas aeruginosa (strain ATCC 15692 / PAO1 / 1C / PRS 101 / LMG 12228) GN=rpoB PE=3 SV=2	1	25	25
	sp|Q51567|SUCD_PSEAE			>sp|Q51567|SUCD_PSEAE Succinyl-CoA ligase [ADP-forming] subunit alpha OS=Pseudomonas aeruginosa (strain ATCC 15692 / PAO1 / 1C / PRS 101 / LMG 12228) GN=sucD PE=3 SV=2	1	9	9
	sp|Q59636|NDK_PSEAE			>sp|Q59636|NDK_PSEAE Nucleoside diphosphate kinase OS=Pseudomonas aeruginosa (strain ATCC 15692 / PAO1 / 1C / PRS 101 / LMG 12228) GN=ndk PE=3 SV=2	1	2	2
	sp|Q59637|ODP1_PSEAE			>sp|Q59637|ODP1_PSEAE Pyruvate dehydrogenase E1 component OS=Pseudomonas aeruginosa (strain ATCC 15692 / PAO1 / 1C / PRS 101 / LMG 12228) GN=aceE PE=3 SV=2	1	26	26
	sp|Q59638|ODP2_PSEAE			>sp|Q59638|ODP2_PSEAE Dihydrolipoyllysine-residue acetyltransferase component of pyruvate dehydrogenase complex OS=Pseudomonas aeruginosa (strain ATCC 15692 / PAO1 / 1C / PRS 101 / LMG 12228) GN=aceF PE=2 SV=2	1	10	10
	sp|Q9HT16|ATPF_PSEAE			>sp|Q9HT16|ATPF_PSEAE ATP synthase subunit b OS=Pseudomonas aeruginosa (strain ATCC 15692 / PAO1 / 1C / PRS 101 / LMG 12228) GN=atpF PE=3 SV=1	1	4	4
	sp|Q9HT18|ATPA_PSEAE			>sp|Q9HT18|ATPA_PSEAE ATP synthase subunit alpha OS=Pseudomonas aeruginosa (strain ATCC 15692 / PAO1 / 1C / PRS 101 / LMG 12228) GN=atpA PE=3 SV=1	1	13	13
	sp|Q9HT19|ATPG_PSEAE			>sp|Q9HT19|ATPG_PSEAE ATP synthase gamma chain OS=Pseudomonas aeruginosa (strain ATCC 15692 / PAO1 / 1C / PRS 101 / LMG 12228) GN=atpG PE=3 SV=1	1	2	2
	sp|Q9HT20|ATPB_PSEAE			>sp|Q9HT20|ATPB_PSEAE ATP synthase subunit beta OS=Pseudomonas aeruginosa (strain ATCC 15692 / PAO1 / 1C / PRS 101 / LMG 12228) GN=atpD PE=3 SV=1	1	15	15
	sp|Q9HT21|ATPE_PSEAE			>sp|Q9HT21|ATPE_PSEAE ATP synthase epsilon chain OS=Pseudomonas aeruginosa (strain ATCC 15692 / PAO1 / 1C / PRS 101 / LMG 12228) GN=atpC PE=3 SV=1	1	2	2
	sp|Q9HT95|ATSE4_PSEAE			>sp|Q9HT95|ATSE4_PSEAE Acetyltransferase PA5475 OS=Pseudomonas aeruginosa (strain ATCC 15692 / PAO1 / 1C / PRS 101 / LMG 12228) GN=PA5475 PE=3 SV=1	1	2	2
	sp|Q9HTD7|ASPA_PSEAE			>sp|Q9HTD7|ASPA_PSEAE Aspartate ammonia-lyase OS=Pseudomonas aeruginosa (strain ATCC 15692 / PAO1 / 1C / PRS 101 / LMG 12228) GN=aspA PE=3 SV=1	1	5	5
	sp|Q9HTN8|RL28_PSEAE			>sp|Q9HTN8|RL28_PSEAE 50S ribosomal protein L28 OS=Pseudomonas aeruginosa (strain ATCC 15692 / PAO1 / 1C / PRS 101 / LMG 12228) GN=rpmB PE=3 SV=1	1	1	1
	sp|Q9HTQ0|DADA1_PSEAE			>sp|Q9HTQ0|DADA1_PSEAE D-amino acid dehydrogenase 1 OS=Pseudomonas aeruginosa (strain ATCC 15692 / PAO1 / 1C / PRS 101 / LMG 12228) GN=dadA1 PE=1 SV=1	1	5	5
	sp|Q9HTV1|RHO_PSEAE			>sp|Q9HTV1|RHO_PSEAE Transcription termination factor Rho OS=Pseudomonas aeruginosa (strain ATCC 15692 / PAO1 / 1C / PRS 101 / LMG 12228) GN=rho PE=3 SV=1	1	4	4
	sp|Q9HTZ7|PCKA_PSEAE			>sp|Q9HTZ7|PCKA_PSEAE Phosphoenolpyruvate carboxykinase [ATP] OS=Pseudomonas aeruginosa (strain ATCC 15692 / PAO1 / 1C / PRS 101 / LMG 12228) GN=pckA PE=3 SV=1	1	4	4
	sp|Q9HU21|RMLC_PSEAE			>sp|Q9HU21|RMLC_PSEAE dTDP-4-dehydrorhamnose 3,5-epimerase OS=Pseudomonas aeruginosa (strain ATCC 15692 / PAO1 / 1C / PRS 101 / LMG 12228) GN=rmlC PE=1 SV=1	1	1	1
	sp|Q9HU56|SECB_PSEAE			>sp|Q9HU56|SECB_PSEAE Protein-export protein SecB OS=Pseudomonas aeruginosa (strain ATCC 15692 / PAO1 / 1C / PRS 101 / LMG 12228) GN=secB PE=3 SV=1	1	1	1
	sp|Q9HU65|GLNA_PSEAE			>sp|Q9HU65|GLNA_PSEAE Glutamine synthetase OS=Pseudomonas aeruginosa (strain ATCC 15692 / PAO1 / 1C / PRS 101 / LMG 12228) GN=glnA PE=1 SV=1	1	7	7
	sp|Q9HUC0|UBIE_PSEAE			>sp|Q9HUC0|UBIE_PSEAE Ubiquinone/menaquinone biosynthesis C-methyltransferase UbiE OS=Pseudomonas aeruginosa (strain ATCC 15692 / PAO1 / 1C / PRS 101 / LMG 12228) GN=ubiE PE=3 SV=1	1	1	1
	sp|Q9HUC8|SYR_PSEAE			>sp|Q9HUC8|SYR_PSEAE Arginine--tRNA ligase OS=Pseudomonas aeruginosa (strain ATCC 15692 / PAO1 / 1C / PRS 101 / LMG 12228) GN=argS PE=3 SV=1	1	1	1
	sp|Q9HUM0|HFQ_PSEAE			>sp|Q9HUM0|HFQ_PSEAE RNA-binding protein Hfq OS=Pseudomonas aeruginosa (strain ATCC 15692 / PAO1 / 1C / PRS 101 / LMG 12228) GN=hfq PE=1 SV=1	1	1	1
	sp|Q9HUM6|PURA_PSEAE			>sp|Q9HUM6|PURA_PSEAE Adenylosuccinate synthetase OS=Pseudomonas aeruginosa (strain ATCC 15692 / PAO1 / 1C / PRS 101 / LMG 12228) GN=purA PE=3 SV=1	1	2	2
	sp|Q9HUM9|RS6_PSEAE			>sp|Q9HUM9|RS6_PSEAE 30S ribosomal protein S6 OS=Pseudomonas aeruginosa (strain ATCC 15692 / PAO1 / 1C / PRS 101 / LMG 12228) GN=rpsF PE=3 SV=1	1	2	2
	sp|Q9HUN0|RS18_PSEAE			>sp|Q9HUN0|RS18_PSEAE 30S ribosomal protein S18 OS=Pseudomonas aeruginosa (strain ATCC 15692 / PAO1 / 1C / PRS 101 / LMG 12228) GN=rpsR PE=3 SV=1	1	1	1
	sp|Q9HV43|DNAK_PSEAE			>sp|Q9HV43|DNAK_PSEAE Chaperone protein DnaK OS=Pseudomonas aeruginosa (strain ATCC 15692 / PAO1 / 1C / PRS 101 / LMG 12228) GN=dnaK PE=3 SV=1	1	8	8
	sp|Q9HV50|GLMM_PSEAE			>sp|Q9HV50|GLMM_PSEAE Phosphoglucosamine mutase OS=Pseudomonas aeruginosa (strain ATCC 15692 / PAO1 / 1C / PRS 101 / LMG 12228) GN=glmM PE=3 SV=1	1	2	2
	sp|Q9HV55|IF2_PSEAE			>sp|Q9HV55|IF2_PSEAE Translation initiation factor IF-2 OS=Pseudomonas aeruginosa (strain ATCC 15692 / PAO1 / 1C / PRS 101 / LMG 12228) GN=infB PE=3 SV=1	1	1	1
	sp|Q9HV59|PNP_PSEAE			>sp|Q9HV59|PNP_PSEAE Polyribonucleotide nucleotidyltransferase OS=Pseudomonas aeruginosa (strain ATCC 15692 / PAO1 / 1C / PRS 101 / LMG 12228) GN=pnp PE=3 SV=1	1	7	7
	sp|Q9HVA2|ILVC_PSEAE			>sp|Q9HVA2|ILVC_PSEAE Ketol-acid reductoisomerase OS=Pseudomonas aeruginosa (strain ATCC 15692 / PAO1 / 1C / PRS 101 / LMG 12228) GN=ilvC PE=1 SV=1	1	4	4
	sp|Q9HVC4|RL25_PSEAE			>sp|Q9HVC4|RL25_PSEAE 50S ribosomal protein L25 OS=Pseudomonas aeruginosa (strain ATCC 15692 / PAO1 / 1C / PRS 101 / LMG 12228) GN=rplY PE=3 SV=1	1	5	5
	sp|Q9HVC5|KPRS_PSEAE			>sp|Q9HVC5|KPRS_PSEAE Ribose-phosphate pyrophosphokinase OS=Pseudomonas aeruginosa (strain ATCC 15692 / PAO1 / 1C / PRS 101 / LMG 12228) GN=prs PE=3 SV=1	1	3	3
	sp|Q9HVF1|MQO2_PSEAE			>sp|Q9HVF1|MQO2_PSEAE Probable malate:quinone oxidoreductase 2 OS=Pseudomonas aeruginosa (strain ATCC 15692 / PAO1 / 1C / PRS 101 / LMG 12228) GN=mqo2 PE=3 SV=1	1	4	4
	sp|Q9HVI7|GLYA3_PSEAE;sp|Q9I138|GLYA2_PSEAE			>sp|Q9HVI7|GLYA3_PSEAE Serine hydroxymethyltransferase 3 OS=Pseudomonas aeruginosa (strain ATCC 15692 / PAO1 / 1C / PRS 101 / LMG 12228) GN=glyA2 PE=3 SV=1	2	4	4
	sp|Q9HVM4|SYI_PSEAE			>sp|Q9HVM4|SYI_PSEAE Isoleucine--tRNA ligase OS=Pseudomonas aeruginosa (strain ATCC 15692 / PAO1 / 1C / PRS 101 / LMG 12228) GN=ileS PE=3 SV=1	1	1	1
	sp|Q9HVN5|CLPB_PSEAE			>sp|Q9HVN5|CLPB_PSEAE Chaperone protein ClpB OS=Pseudomonas aeruginosa (strain ATCC 15692 / PAO1 / 1C / PRS 101 / LMG 12228) GN=clpB PE=3 SV=1	1	8	6
	sp|Q9HVT8|GATA_PSEAE			>sp|Q9HVT8|GATA_PSEAE Glutamyl-tRNA(Gln) amidotransferase subunit A OS=Pseudomonas aeruginosa (strain ATCC 15692 / PAO1 / 1C / PRS 101 / LMG 12228) GN=gatA PE=1 SV=1	1	2	2
	sp|Q9HVW7|MURA_PSEAE			>sp|Q9HVW7|MURA_PSEAE UDP-N-acetylglucosamine 1-carboxyvinyltransferase OS=Pseudomonas aeruginosa (strain ATCC 15692 / PAO1 / 1C / PRS 101 / LMG 12228) GN=murA PE=1 SV=1	1	1	1
	sp|Q9HVX6|SYW_PSEAE			>sp|Q9HVX6|SYW_PSEAE Tryptophan--tRNA ligase OS=Pseudomonas aeruginosa (strain ATCC 15692 / PAO1 / 1C / PRS 101 / LMG 12228) GN=trpS PE=3 SV=1	1	1	1
	sp|Q9HW02|MURC_PSEAE			>sp|Q9HW02|MURC_PSEAE UDP-N-acetylmuramate--L-alanine ligase OS=Pseudomonas aeruginosa (strain ATCC 15692 / PAO1 / 1C / PRS 101 / LMG 12228) GN=murC PE=3 SV=1	1	2	2
	sp|Q9HW11|Y4395_PSEAE			>sp|Q9HW11|Y4395_PSEAE UPF0234 protein PA4395 OS=Pseudomonas aeruginosa (strain ATCC 15692 / PAO1 / 1C / PRS 101 / LMG 12228) GN=PA4395 PE=3 SV=1	1	1	1
	sp|Q9HWC5|RL11_PSEAE			>sp|Q9HWC5|RL11_PSEAE 50S ribosomal protein L11 OS=Pseudomonas aeruginosa (strain ATCC 15692 / PAO1 / 1C / PRS 101 / LMG 12228) GN=rplK PE=3 SV=1	1	3	3
	sp|Q9HWC9|RPOC_PSEAE			>sp|Q9HWC9|RPOC_PSEAE DNA-directed RNA polymerase subunit beta OS=Pseudomonas aeruginosa (strain ATCC 15692 / PAO1 / 1C / PRS 101 / LMG 12228) GN=rpoC PE=3 SV=1	1	25	25
	sp|Q9HWD0|RS12_PSEAE			>sp|Q9HWD0|RS12_PSEAE 30S ribosomal protein S12 OS=Pseudomonas aeruginosa (strain ATCC 15692 / PAO1 / 1C / PRS 101 / LMG 12228) GN=rpsL PE=3 SV=1	1	1	1
	sp|Q9HWD2|EFG1_PSEAE;sp|Q9I244|EFG2_PSEAE			>sp|Q9HWD2|EFG1_PSEAE Elongation factor G 1 OS=Pseudomonas aeruginosa (strain ATCC 15692 / PAO1 / 1C / PRS 101 / LMG 12228) GN=fusA PE=1 SV=1	2	21	21
	sp|Q9HWD5|RL3_PSEAE			>sp|Q9HWD5|RL3_PSEAE 50S ribosomal protein L3 OS=Pseudomonas aeruginosa (strain ATCC 15692 / PAO1 / 1C / PRS 101 / LMG 12228) GN=rplC PE=3 SV=1	1	3	3
	sp|Q9HWD8|RL2_PSEAE			>sp|Q9HWD8|RL2_PSEAE 50S ribosomal protein L2 OS=Pseudomonas aeruginosa (strain ATCC 15692 / PAO1 / 1C / PRS 101 / LMG 12228) GN=rplB PE=3 SV=1	1	6	6
	sp|Q9HWE0|RL22_PSEAE			>sp|Q9HWE0|RL22_PSEAE 50S ribosomal protein L22 OS=Pseudomonas aeruginosa (strain ATCC 15692 / PAO1 / 1C / PRS 101 / LMG 12228) GN=rplV PE=3 SV=1	1	1	1
	sp|Q9HWE1|RS3_PSEAE			>sp|Q9HWE1|RS3_PSEAE 30S ribosomal protein S3 OS=Pseudomonas aeruginosa (strain ATCC 15692 / PAO1 / 1C / PRS 101 / LMG 12228) GN=rpsC PE=3 SV=1	1	2	2
	sp|Q9HWE4|RS17_PSEAE			>sp|Q9HWE4|RS17_PSEAE 30S ribosomal protein S17 OS=Pseudomonas aeruginosa (strain ATCC 15692 / PAO1 / 1C / PRS 101 / LMG 12228) GN=rpsQ PE=3 SV=1	1	1	1
	sp|Q9HWE5|RL14_PSEAE			>sp|Q9HWE5|RL14_PSEAE 50S ribosomal protein L14 OS=Pseudomonas aeruginosa (strain ATCC 15692 / PAO1 / 1C / PRS 101 / LMG 12228) GN=rplN PE=3 SV=1	1	2	2
	sp|Q9HWE8|RS14_PSEAE			>sp|Q9HWE8|RS14_PSEAE 30S ribosomal protein S14 OS=Pseudomonas aeruginosa (strain ATCC 15692 / PAO1 / 1C / PRS 101 / LMG 12228) GN=rpsN PE=3 SV=1	1	1	1
	sp|Q9HWE9|RS8_PSEAE			>sp|Q9HWE9|RS8_PSEAE 30S ribosomal protein S8 OS=Pseudomonas aeruginosa (strain ATCC 15692 / PAO1 / 1C / PRS 101 / LMG 12228) GN=rpsH PE=3 SV=1	1	4	4
	sp|Q9HWF1|RL18_PSEAE			>sp|Q9HWF1|RL18_PSEAE 50S ribosomal protein L18 OS=Pseudomonas aeruginosa (strain ATCC 15692 / PAO1 / 1C / PRS 101 / LMG 12228) GN=rplR PE=3 SV=1	1	1	1
	sp|Q9HWF2|RS5_PSEAE			>sp|Q9HWF2|RS5_PSEAE 30S ribosomal protein S5 OS=Pseudomonas aeruginosa (strain ATCC 15692 / PAO1 / 1C / PRS 101 / LMG 12228) GN=rpsE PE=3 SV=1	1	6	6
	sp|Q9HWF3|RL30_PSEAE			>sp|Q9HWF3|RL30_PSEAE 50S ribosomal protein L30 OS=Pseudomonas aeruginosa (strain ATCC 15692 / PAO1 / 1C / PRS 101 / LMG 12228) GN=rpmD PE=1 SV=3	1	1	1
	sp|Q9HWF7|RS13_PSEAE			>sp|Q9HWF7|RS13_PSEAE 30S ribosomal protein S13 OS=Pseudomonas aeruginosa (strain ATCC 15692 / PAO1 / 1C / PRS 101 / LMG 12228) GN=rpsM PE=3 SV=1	1	1	1
	sp|Q9HWF8|RS11_PSEAE			>sp|Q9HWF8|RS11_PSEAE 30S ribosomal protein S11 OS=Pseudomonas aeruginosa (strain ATCC 15692 / PAO1 / 1C / PRS 101 / LMG 12228) GN=rpsK PE=3 SV=1	1	2	2
	sp|Q9HWG0|UVRA_PSEAE			>sp|Q9HWG0|UVRA_PSEAE UvrABC system protein A OS=Pseudomonas aeruginosa (strain ATCC 15692 / PAO1 / 1C / PRS 101 / LMG 12228) GN=uvrA PE=3 SV=1	1	1	1
	sp|Q9HWZ6|IPYR_PSEAE			>sp|Q9HWZ6|IPYR_PSEAE Inorganic pyrophosphatase OS=Pseudomonas aeruginosa (strain ATCC 15692 / PAO1 / 1C / PRS 101 / LMG 12228) GN=ppa PE=1 SV=1	1	1	1
	sp|Q9HXM6|GUAA_PSEAE			>sp|Q9HXM6|GUAA_PSEAE GMP synthase [glutamine-hydrolyzing] OS=Pseudomonas aeruginosa (strain ATCC 15692 / PAO1 / 1C / PRS 101 / LMG 12228) GN=guaA PE=3 SV=1	1	2	2
	sp|Q9HXN2|PUR4_PSEAE			>sp|Q9HXN2|PUR4_PSEAE Phosphoribosylformylglycinamidine synthase OS=Pseudomonas aeruginosa (strain ATCC 15692 / PAO1 / 1C / PRS 101 / LMG 12228) GN=purL PE=3 SV=1	1	1	1
	sp|Q9HXZ2|ACCA_PSEAE			>sp|Q9HXZ2|ACCA_PSEAE Acetyl-coenzyme A carboxylase carboxyl transferase subunit alpha OS=Pseudomonas aeruginosa (strain ATCC 15692 / PAO1 / 1C / PRS 101 / LMG 12228) GN=accA PE=1 SV=1	1	1	1
	sp|Q9HXZ4|PYRG_PSEAE			>sp|Q9HXZ4|PYRG_PSEAE CTP synthase OS=Pseudomonas aeruginosa (strain ATCC 15692 / PAO1 / 1C / PRS 101 / LMG 12228) GN=pyrG PE=3 SV=1	1	7	7
	sp|Q9HXZ5|ENO_PSEAE			>sp|Q9HXZ5|ENO_PSEAE Enolase OS=Pseudomonas aeruginosa (strain ATCC 15692 / PAO1 / 1C / PRS 101 / LMG 12228) GN=eno PE=3 SV=1	1	2	2
	sp|Q9HY84|ASSY_PSEAE			>sp|Q9HY84|ASSY_PSEAE Argininosuccinate synthase OS=Pseudomonas aeruginosa (strain ATCC 15692 / PAO1 / 1C / PRS 101 / LMG 12228) GN=argG PE=3 SV=1	1	2	2
	sp|Q9HYD5|MAO1_PSEAE			>sp|Q9HYD5|MAO1_PSEAE NAD-dependent malic enzyme OS=Pseudomonas aeruginosa (strain ATCC 15692 / PAO1 / 1C / PRS 101 / LMG 12228) GN=maeA PE=3 SV=1	1	2	2
	sp|Q9HZ71|RS1_PSEAE			>sp|Q9HZ71|RS1_PSEAE 30S ribosomal protein S1 OS=Pseudomonas aeruginosa (strain ATCC 15692 / PAO1 / 1C / PRS 101 / LMG 12228) GN=rpsA PE=3 SV=1	1	12	12
	sp|Q9HZ76|WBPE_PSEAE			>sp|Q9HZ76|WBPE_PSEAE UDP-2-acetamido-2-deoxy-3-oxo-D-glucuronate aminotransferase OS=Pseudomonas aeruginosa (strain ATCC 15692 / PAO1 / 1C / PRS 101 / LMG 12228) GN=wbpE PE=1 SV=1	1	4	4
	sp|Q9HZA7|ACCD_PSEAE			>sp|Q9HZA7|ACCD_PSEAE Acetyl-coenzyme A carboxylase carboxyl transferase subunit beta OS=Pseudomonas aeruginosa (strain ATCC 15692 / PAO1 / 1C / PRS 101 / LMG 12228) GN=accD PE=1 SV=1	1	2	2
	sp|Q9HZE0|DHE2_PSEAE			>sp|Q9HZE0|DHE2_PSEAE NAD-specific glutamate dehydrogenase OS=Pseudomonas aeruginosa (strain ATCC 15692 / PAO1 / 1C / PRS 101 / LMG 12228) GN=gdhB PE=1 SV=1	1	31	31
	sp|Q9HZJ2|FADB_PSEAE			>sp|Q9HZJ2|FADB_PSEAE Fatty acid oxidation complex subunit alpha OS=Pseudomonas aeruginosa (strain ATCC 15692 / PAO1 / 1C / PRS 101 / LMG 12228) GN=fadB PE=3 SV=1	1	5	5
	sp|Q9HZJ3|FADA_PSEAE			>sp|Q9HZJ3|FADA_PSEAE 3-ketoacyl-CoA thiolase OS=Pseudomonas aeruginosa (strain ATCC 15692 / PAO1 / 1C / PRS 101 / LMG 12228) GN=fadA PE=3 SV=1	1	1	1
	sp|Q9HZP6|ETFB_PSEAE			>sp|Q9HZP6|ETFB_PSEAE Electron transfer flavoprotein subunit beta OS=Pseudomonas aeruginosa (strain ATCC 15692 / PAO1 / 1C / PRS 101 / LMG 12228) GN=etfB PE=3 SV=1	1	4	4
	sp|Q9HZZ2|EFP_PSEAE			>sp|Q9HZZ2|EFP_PSEAE Elongation factor P OS=Pseudomonas aeruginosa (strain ATCC 15692 / PAO1 / 1C / PRS 101 / LMG 12228) GN=efp PE=1 SV=1	1	1	1
	sp|Q9I047|TAL_PSEAE			>sp|Q9I047|TAL_PSEAE Transaldolase OS=Pseudomonas aeruginosa (strain ATCC 15692 / PAO1 / 1C / PRS 101 / LMG 12228) GN=tal PE=3 SV=1	1	1	1
	sp|Q9I099|SYT_PSEAE			>sp|Q9I099|SYT_PSEAE Threonine--tRNA ligase OS=Pseudomonas aeruginosa (strain ATCC 15692 / PAO1 / 1C / PRS 101 / LMG 12228) GN=thrS PE=3 SV=1	1	2	2
	sp|Q9I0A0|IF3_PSEAE			>sp|Q9I0A0|IF3_PSEAE Translation initiation factor IF-3 OS=Pseudomonas aeruginosa (strain ATCC 15692 / PAO1 / 1C / PRS 101 / LMG 12228) GN=infC PE=3 SV=1	1	1	1
	sp|Q9I0A2|RL20_PSEAE			>sp|Q9I0A2|RL20_PSEAE 50S ribosomal protein L20 OS=Pseudomonas aeruginosa (strain ATCC 15692 / PAO1 / 1C / PRS 101 / LMG 12228) GN=rplT PE=3 SV=1	1	1	1
	sp|Q9I0J4|NUOI_PSEAE			>sp|Q9I0J4|NUOI_PSEAE NADH-quinone oxidoreductase subunit I OS=Pseudomonas aeruginosa (strain ATCC 15692 / PAO1 / 1C / PRS 101 / LMG 12228) GN=nuoI PE=3 SV=1	1	1	1
	sp|Q9I0J5|NUOH_PSEAE			>sp|Q9I0J5|NUOH_PSEAE NADH-quinone oxidoreductase subunit H OS=Pseudomonas aeruginosa (strain ATCC 15692 / PAO1 / 1C / PRS 101 / LMG 12228) GN=nuoH PE=3 SV=1	1	1	1
	sp|Q9I0J6|NUOG_PSEAE			>sp|Q9I0J6|NUOG_PSEAE NADH-quinone oxidoreductase subunit G OS=Pseudomonas aeruginosa (strain ATCC 15692 / PAO1 / 1C / PRS 101 / LMG 12228) GN=nuoG PE=3 SV=1	1	11	11
	sp|Q9I0J7|NUOF_PSEAE			>sp|Q9I0J7|NUOF_PSEAE NADH-quinone oxidoreductase subunit F OS=Pseudomonas aeruginosa (strain ATCC 15692 / PAO1 / 1C / PRS 101 / LMG 12228) GN=nuoF PE=3 SV=1	1	4	4
	sp|Q9I0J9|NUOCD_PSEAE			>sp|Q9I0J9|NUOCD_PSEAE NADH-quinone oxidoreductase subunit C/D OS=Pseudomonas aeruginosa (strain ATCC 15692 / PAO1 / 1C / PRS 101 / LMG 12228) GN=nuoC PE=3 SV=1	1	5	5
	sp|Q9I0K4|ACEA_PSEAE			>sp|Q9I0K4|ACEA_PSEAE Isocitrate lyase OS=Pseudomonas aeruginosa (strain ATCC 15692 / PAO1 / 1C / PRS 101 / LMG 12228) GN=PA2634 PE=1 SV=1	1	9	9
	sp|Q9I0K9|PUR8_PSEAE			>sp|Q9I0K9|PUR8_PSEAE Adenylosuccinate lyase OS=Pseudomonas aeruginosa (strain ATCC 15692 / PAO1 / 1C / PRS 101 / LMG 12228) GN=purB PE=3 SV=1	1	2	2
	sp|Q9I1L9|DLDH1_PSEAE			>sp|Q9I1L9|DLDH1_PSEAE Dihydrolipoyl dehydrogenase OS=Pseudomonas aeruginosa (strain ATCC 15692 / PAO1 / 1C / PRS 101 / LMG 12228) GN=lpdV PE=1 SV=1	1	1	1
	sp|Q9I1M2|ODBA_PSEAE			>sp|Q9I1M2|ODBA_PSEAE 2-oxoisovalerate dehydrogenase subunit alpha OS=Pseudomonas aeruginosa (strain ATCC 15692 / PAO1 / 1C / PRS 101 / LMG 12228) GN=bkdA1 PE=3 SV=1	1	1	1
	sp|Q9I1S2|HCNB_PSEAE			>sp|Q9I1S2|HCNB_PSEAE Hydrogen cyanide synthase subunit HcnB OS=Pseudomonas aeruginosa (strain ATCC 15692 / PAO1 / 1C / PRS 101 / LMG 12228) GN=hcnB PE=1 SV=1	1	5	5
	sp|Q9I1Z9|Y2116_PSEAE			>sp|Q9I1Z9|Y2116_PSEAE UPF0317 protein PA2116 OS=Pseudomonas aeruginosa (strain ATCC 15692 / PAO1 / 1C / PRS 101 / LMG 12228) GN=PA2116 PE=3 SV=1	1	1	1
	sp|Q9I2A8|ATOB_PSEAE			>sp|Q9I2A8|ATOB_PSEAE Acetyl-CoA acetyltransferase OS=Pseudomonas aeruginosa (strain ATCC 15692 / PAO1 / 1C / PRS 101 / LMG 12228) GN=atoB PE=3 SV=1	1	3	3
	sp|Q9I2V5|ACNB_PSEAE			>sp|Q9I2V5|ACNB_PSEAE Aconitate hydratase B OS=Pseudomonas aeruginosa (strain ATCC 15692 / PAO1 / 1C / PRS 101 / LMG 12228) GN=acnB PE=3 SV=1	1	16	16
	sp|Q9I383|SELD_PSEAE			>sp|Q9I383|SELD_PSEAE Selenide, water dikinase OS=Pseudomonas aeruginosa (strain ATCC 15692 / PAO1 / 1C / PRS 101 / LMG 12228) GN=selD PE=3 SV=1	1	1	1
	sp|Q9I3D1|DLDH2_PSEAE			>sp|Q9I3D1|DLDH2_PSEAE Dihydrolipoyl dehydrogenase OS=Pseudomonas aeruginosa (strain ATCC 15692 / PAO1 / 1C / PRS 101 / LMG 12228) GN=lpdG PE=3 SV=1	1	15	15
	sp|Q9I3D2|ODO2_PSEAE			>sp|Q9I3D2|ODO2_PSEAE Dihydrolipoyllysine-residue succinyltransferase component of 2-oxoglutarate dehydrogenase complex OS=Pseudomonas aeruginosa (strain ATCC 15692 / PAO1 / 1C / PRS 101 / LMG 12228) GN=sucB PE=3 SV=1	1	3	3
	sp|Q9I3F5|ACNA_PSEAE			>sp|Q9I3F5|ACNA_PSEAE Aconitate hydratase A OS=Pseudomonas aeruginosa (strain ATCC 15692 / PAO1 / 1C / PRS 101 / LMG 12228) GN=acnA PE=3 SV=1	1	18	18
	sp|Q9I4W0|PUR7_PSEAE			>sp|Q9I4W0|PUR7_PSEAE Phosphoribosylaminoimidazole-succinocarboxamide synthase OS=Pseudomonas aeruginosa (strain ATCC 15692 / PAO1 / 1C / PRS 101 / LMG 12228) GN=purC PE=3 SV=1	1	1	1
	sp|Q9I4Z4|PAL_PSEAE			>sp|Q9I4Z4|PAL_PSEAE Peptidoglycan-associated lipoprotein OS=Pseudomonas aeruginosa (strain ATCC 15692 / PAO1 / 1C / PRS 101 / LMG 12228) GN=pal PE=3 SV=1	1	6	6
	sp|Q9I502|SYP_PSEAE			>sp|Q9I502|SYP_PSEAE Proline--tRNA ligase OS=Pseudomonas aeruginosa (strain ATCC 15692 / PAO1 / 1C / PRS 101 / LMG 12228) GN=proS PE=3 SV=1	1	1	1
	sp|Q9I558|ACSA1_PSEAE			>sp|Q9I558|ACSA1_PSEAE Acetyl-coenzyme A synthetase 1 OS=Pseudomonas aeruginosa (strain ATCC 15692 / PAO1 / 1C / PRS 101 / LMG 12228) GN=acsA1 PE=3 SV=1	1	1	1
	sp|Q9I576|HPPD_PSEAE			>sp|Q9I576|HPPD_PSEAE 4-hydroxyphenylpyruvate dioxygenase OS=Pseudomonas aeruginosa (strain ATCC 15692 / PAO1 / 1C / PRS 101 / LMG 12228) GN=hpd PE=3 SV=1	1	1	1
	sp|Q9I5A5|PTA_PSEAE			>sp|Q9I5A5|PTA_PSEAE Phosphate acetyltransferase OS=Pseudomonas aeruginosa (strain ATCC 15692 / PAO1 / 1C / PRS 101 / LMG 12228) GN=pta PE=1 SV=1	1	1	1
	sp|Q9I5V8|RS21_PSEAE			>sp|Q9I5V8|RS21_PSEAE 30S ribosomal protein S21 OS=Pseudomonas aeruginosa (strain ATCC 15692 / PAO1 / 1C / PRS 101 / LMG 12228) GN=rpsU PE=1 SV=3	1	1	1
	sp|Q9I5Y1|ALF_PSEAE			>sp|Q9I5Y1|ALF_PSEAE Fructose-bisphosphate aldolase OS=Pseudomonas aeruginosa (strain ATCC 15692 / PAO1 / 1C / PRS 101 / LMG 12228) GN=fba PE=3 SV=1	1	2	2
	sp|Q9I5Y4|PGK_PSEAE			>sp|Q9I5Y4|PGK_PSEAE Phosphoglycerate kinase OS=Pseudomonas aeruginosa (strain ATCC 15692 / PAO1 / 1C / PRS 101 / LMG 12228) GN=pgk PE=3 SV=1	1	1	1
	sp|Q9I5Z0|METK_PSEAE			>sp|Q9I5Z0|METK_PSEAE S-adenosylmethionine synthase OS=Pseudomonas aeruginosa (strain ATCC 15692 / PAO1 / 1C / PRS 101 / LMG 12228) GN=metK PE=3 SV=1	1	5	5
	sp|Q9I636|MASZ_PSEAE			>sp|Q9I636|MASZ_PSEAE Malate synthase G OS=Pseudomonas aeruginosa (strain ATCC 15692 / PAO1 / 1C / PRS 101 / LMG 12228) GN=glcB PE=3 SV=1	1	3	3
	sp|Q9I685|SAHH_PSEAE			>sp|Q9I685|SAHH_PSEAE Adenosylhomocysteinase OS=Pseudomonas aeruginosa (strain ATCC 15692 / PAO1 / 1C / PRS 101 / LMG 12228) GN=ahcY PE=3 SV=1	1	14	14
	sp|Q9I6E0|ILVD_PSEAE			>sp|Q9I6E0|ILVD_PSEAE Dihydroxy-acid dehydratase OS=Pseudomonas aeruginosa (strain ATCC 15692 / PAO1 / 1C / PRS 101 / LMG 12228) GN=ilvD PE=3 SV=1	1	1	1
	sp|Q9I6M4|DAVT_PSEAE			>sp|Q9I6M4|DAVT_PSEAE 5-aminovalerate aminotransferase DavT OS=Pseudomonas aeruginosa (strain ATCC 15692 / PAO1 / 1C / PRS 101 / LMG 12228) GN=davT PE=1 SV=1	1	5	5
	sp|Q9I6M5|DAVD_PSEAE			>sp|Q9I6M5|DAVD_PSEAE Glutarate-semialdehyde dehydrogenase DavD OS=Pseudomonas aeruginosa (strain ATCC 15692 / PAO1 / 1C / PRS 101 / LMG 12228) GN=davD PE=1 SV=1	1	6	6
	sp|Q9I742|CLPV1_PSEAE			>sp|Q9I742|CLPV1_PSEAE Protein ClpV1 OS=Pseudomonas aeruginosa (strain ATCC 15692 / PAO1 / 1C / PRS 101 / LMG 12228) GN=clpV1 PE=1 SV=1	1	3	3
	sp|Q9I747|HCP1_PSEAE			>sp|Q9I747|HCP1_PSEAE Protein hcp1 OS=Pseudomonas aeruginosa (strain ATCC 15692 / PAO1 / 1C / PRS 101 / LMG 12228) GN=hcp1 PE=1 SV=1	1	2	2
	sp|Q9I7C2|GYRB_PSEAE			>sp|Q9I7C2|GYRB_PSEAE DNA gyrase subunit B OS=Pseudomonas aeruginosa (strain ATCC 15692 / PAO1 / 1C / PRS 101 / LMG 12228) GN=gyrB PE=3 SV=1	1	1	1
	sp|Q9I7C4|DPO3B_PSEAE			>sp|Q9I7C4|DPO3B_PSEAE DNA polymerase III subunit beta OS=Pseudomonas aeruginosa (strain ATCC 15692 / PAO1 / 1C / PRS 101 / LMG 12228) GN=dnaN PE=3 SV=1	1	3	3
	sp|Q9LCT3|SECA_PSEAE			>sp|Q9LCT3|SECA_PSEAE Protein translocase subunit SecA OS=Pseudomonas aeruginosa (strain ATCC 15692 / PAO1 / 1C / PRS 101 / LMG 12228) GN=secA PE=3 SV=1	1	1	1
	sp|Q9S508|PHZB2_PSEAE			>sp|Q9S508|PHZB2_PSEAE Phenazine biosynthesis protein PhzB 2 OS=Pseudomonas aeruginosa (strain ATCC 15692 / PAO1 / 1C / PRS 101 / LMG 12228) GN=phzB2 PE=1 SV=1	1	5	5
	sp|Q9S646|PPK_PSEAE			>sp|Q9S646|PPK_PSEAE Polyphosphate kinase OS=Pseudomonas aeruginosa (strain ATCC 15692 / PAO1 / 1C / PRS 101 / LMG 12228) GN=ppk PE=3 SV=1	1	1	1
	sp|Q9X2T1|THIO_PSEAE			>sp|Q9X2T1|THIO_PSEAE Thioredoxin OS=Pseudomonas aeruginosa (strain ATCC 15692 / PAO1 / 1C / PRS 101 / LMG 12228) GN=trxA PE=3 SV=1	1	1	1
	sp|Q9XCL6|SYE_PSEAE			>sp|Q9XCL6|SYE_PSEAE Glutamate--tRNA ligase OS=Pseudomonas aeruginosa (strain ATCC 15692 / PAO1 / 1C / PRS 101 / LMG 12228) GN=gltX PE=3 SV=2	1	1	1
	sp|Q9ZFK4|KDSA_PSEAE			>sp|Q9ZFK4|KDSA_PSEAE 2-dehydro-3-deoxyphosphooctonate aldolase OS=Pseudomonas aeruginosa (strain ATCC 15692 / PAO1 / 1C / PRS 101 / LMG 12228) GN=kdsA PE=1 SV=1	1	1	1
	tr|G3XCZ6|G3XCZ6_PSEAE			>tr|G3XCZ6|G3XCZ6_PSEAE Malonyl CoA-acyl carrier protein transacylase OS=Pseudomonas aeruginosa (strain ATCC 15692 / PAO1 / 1C / PRS 101 / LMG 12228) GN=fabD PE=3 SV=1	1	1	1
	tr|G3XD74|G3XD74_PSEAE			>tr|G3XD74|G3XD74_PSEAE D-ala-D-ala-carboxypeptidase OS=Pseudomonas aeruginosa (strain ATCC 15692 / PAO1 / 1C / PRS 101 / LMG 12228) GN=dacC PE=3 SV=1	1	1	1
	tr|Q9HT36|Q9HT36_PSEAE			>tr|Q9HT36|Q9HT36_PSEAE N-acetylmuramoyl-L-alanine amidase OS=Pseudomonas aeruginosa (strain ATCC 15692 / PAO1 / 1C / PRS 101 / LMG 12228) GN=amiA PE=4 SV=1	1	1	1
	tr|Q9HTB5|Q9HTB5_PSEAE			>tr|Q9HTB5|Q9HTB5_PSEAE Uncharacterized protein OS=Pseudomonas aeruginosa (strain ATCC 15692 / PAO1 / 1C / PRS 101 / LMG 12228) GN=PA5455 PE=4 SV=1	1	1	1
	tr|Q9HTD1|Q9HTD1_PSEAE			>tr|Q9HTD1|Q9HTD1_PSEAE Probable transcarboxylase subunit OS=Pseudomonas aeruginosa (strain ATCC 15692 / PAO1 / 1C / PRS 101 / LMG 12228) GN=PA5435 PE=4 SV=1	1	14	14
	tr|Q9HTD8|Q9HTD8_PSEAE			>tr|Q9HTD8|Q9HTD8_PSEAE Probable transcriptional regulator OS=Pseudomonas aeruginosa (strain ATCC 15692 / PAO1 / 1C / PRS 101 / LMG 12228) GN=PA5428 PE=4 SV=1	1	2	2
	tr|Q9HTD9|Q9HTD9_PSEAE			>tr|Q9HTD9|Q9HTD9_PSEAE Alcohol dehydrogenase OS=Pseudomonas aeruginosa (strain ATCC 15692 / PAO1 / 1C / PRS 101 / LMG 12228) GN=adhA PE=1 SV=1	1	11	11
	tr|Q9HTP2|Q9HTP2_PSEAE			>tr|Q9HTP2|Q9HTP2_PSEAE Probable aldehyde dehydrogenase OS=Pseudomonas aeruginosa (strain ATCC 15692 / PAO1 / 1C / PRS 101 / LMG 12228) GN=PA5312 PE=3 SV=1	1	2	2
	tr|Q9HTU9|Q9HTU9_PSEAE			>tr|Q9HTU9|Q9HTU9_PSEAE Uncharacterized protein OS=Pseudomonas aeruginosa (strain ATCC 15692 / PAO1 / 1C / PRS 101 / LMG 12228) GN=PA5245 PE=4 SV=1	1	2	2
	tr|Q9HU24|Q9HU24_PSEAE			>tr|Q9HU24|Q9HU24_PSEAE dTDP-glucose 4,6-dehydratase OS=Pseudomonas aeruginosa (strain ATCC 15692 / PAO1 / 1C / PRS 101 / LMG 12228) GN=rmlB PE=3 SV=1	1	2	2
	tr|Q9HUD3|Q9HUD3_PSEAE			>tr|Q9HUD3|Q9HUD3_PSEAE Malic enzyme OS=Pseudomonas aeruginosa (strain ATCC 15692 / PAO1 / 1C / PRS 101 / LMG 12228) GN=PA5046 PE=4 SV=1	1	3	3
	tr|Q9HUG0|Q9HUG0_PSEAE			>tr|Q9HUG0|Q9HUG0_PSEAE Probable carbamoyl transferase OS=Pseudomonas aeruginosa (strain ATCC 15692 / PAO1 / 1C / PRS 101 / LMG 12228) GN=PA5005 PE=4 SV=1	1	1	1
	tr|Q9HUZ3|Q9HUZ3_PSEAE			>tr|Q9HUZ3|Q9HUZ3_PSEAE Uncharacterized protein OS=Pseudomonas aeruginosa (strain ATCC 15692 / PAO1 / 1C / PRS 101 / LMG 12228) GN=PA4817 PE=4 SV=1	1	1	1
	tr|Q9HV54|Q9HV54_PSEAE			>tr|Q9HV54|Q9HV54_PSEAE Transcription termination/antitermination protein NusA OS=Pseudomonas aeruginosa (strain ATCC 15692 / PAO1 / 1C / PRS 101 / LMG 12228) GN=nusA PE=3 SV=1	1	3	3
	tr|Q9HV96|Q9HV96_PSEAE			>tr|Q9HV96|Q9HV96_PSEAE Uncharacterized protein OS=Pseudomonas aeruginosa (strain ATCC 15692 / PAO1 / 1C / PRS 101 / LMG 12228) GN=PA4701 PE=4 SV=1	1	3	3
	tr|Q9HVD5|Q9HVD5_PSEAE			>tr|Q9HVD5|Q9HVD5_PSEAE Uncharacterized protein OS=Pseudomonas aeruginosa (strain ATCC 15692 / PAO1 / 1C / PRS 101 / LMG 12228) GN=PA4657 PE=4 SV=1	1	1	1
	tr|Q9HVF9|Q9HVF9_PSEAE			>tr|Q9HVF9|Q9HVF9_PSEAE Uncharacterized protein OS=Pseudomonas aeruginosa (strain ATCC 15692 / PAO1 / 1C / PRS 101 / LMG 12228) GN=PA4632 PE=3 SV=1	1	1	1
	tr|Q9HVJ1|Q9HVJ1_PSEAE			>tr|Q9HVJ1|Q9HVJ1_PSEAE Probable ATP-binding component of ABC transporter OS=Pseudomonas aeruginosa (strain ATCC 15692 / PAO1 / 1C / PRS 101 / LMG 12228) GN=PA4595 PE=4 SV=1	1	5	5
	tr|Q9HVM0|Q9HVM0_PSEAE			>tr|Q9HVM0|Q9HVM0_PSEAE Uncharacterized protein OS=Pseudomonas aeruginosa (strain ATCC 15692 / PAO1 / 1C / PRS 101 / LMG 12228) GN=PA4564 PE=4 SV=1	1	1	1
	tr|Q9HVS8|Q9HVS8_PSEAE			>tr|Q9HVS8|Q9HVS8_PSEAE RoxR OS=Pseudomonas aeruginosa (strain ATCC 15692 / PAO1 / 1C / PRS 101 / LMG 12228) GN=roxR PE=4 SV=1	1	1	1
	tr|Q9HVU0|Q9HVU0_PSEAE			>tr|Q9HVU0|Q9HVU0_PSEAE Rod shape-determining protein MreB OS=Pseudomonas aeruginosa (strain ATCC 15692 / PAO1 / 1C / PRS 101 / LMG 12228) GN=mreB PE=4 SV=1	1	2	2
	tr|Q9HVY4|Q9HVY4_PSEAE			>tr|Q9HVY4|Q9HVY4_PSEAE Ubiquinol-cytochrome c reductase iron-sulfur subunit OS=Pseudomonas aeruginosa (strain ATCC 15692 / PAO1 / 1C / PRS 101 / LMG 12228) GN=PA4431 PE=4 SV=1	1	1	1
	tr|Q9HVY5|Q9HVY5_PSEAE			>tr|Q9HVY5|Q9HVY5_PSEAE Cytochrome b OS=Pseudomonas aeruginosa (strain ATCC 15692 / PAO1 / 1C / PRS 101 / LMG 12228) GN=PA4430 PE=3 SV=1	1	2	2
	tr|Q9HVY6|Q9HVY6_PSEAE			>tr|Q9HVY6|Q9HVY6_PSEAE Probable cytochrome c1 OS=Pseudomonas aeruginosa (strain ATCC 15692 / PAO1 / 1C / PRS 101 / LMG 12228) GN=PA4429 PE=4 SV=1	1	2	2
	tr|Q9HW15|Q9HW15_PSEAE			>tr|Q9HW15|Q9HW15_PSEAE Probable short-chain dehydrogenase OS=Pseudomonas aeruginosa (strain ATCC 15692 / PAO1 / 1C / PRS 101 / LMG 12228) GN=speA PE=4 SV=1	1	2	2
	tr|Q9HW49|Q9HW49_PSEAE			>tr|Q9HW49|Q9HW49_PSEAE Uncharacterized protein OS=Pseudomonas aeruginosa (strain ATCC 15692 / PAO1 / 1C / PRS 101 / LMG 12228) GN=PA4352 PE=3 SV=1	1	6	6
	tr|Q9HW68|Q9HW68_PSEAE			>tr|Q9HW68|Q9HW68_PSEAE Probable fumarase OS=Pseudomonas aeruginosa (strain ATCC 15692 / PAO1 / 1C / PRS 101 / LMG 12228) GN=PA4333 PE=4 SV=1	1	1	1
	tr|Q9HW72|Q9HW72_PSEAE			>tr|Q9HW72|Q9HW72_PSEAE Pyruvate kinase OS=Pseudomonas aeruginosa (strain ATCC 15692 / PAO1 / 1C / PRS 101 / LMG 12228) GN=pykA PE=3 SV=1	1	4	4
	tr|Q9HW80|Q9HW80_PSEAE			>tr|Q9HW80|Q9HW80_PSEAE Uncharacterized protein OS=Pseudomonas aeruginosa (strain ATCC 15692 / PAO1 / 1C / PRS 101 / LMG 12228) GN=PA4321 PE=4 SV=1	1	1	1
	tr|Q9HWG9|Q9HWG9_PSEAE			>tr|Q9HWG9|Q9HWG9_PSEAE Flavin-containing monooxygenase OS=Pseudomonas aeruginosa (strain ATCC 15692 / PAO1 / 1C / PRS 101 / LMG 12228) GN=phzS PE=1 SV=1	1	5	5
	tr|Q9HWQ0|Q9HWQ0_PSEAE			>tr|Q9HWQ0|Q9HWQ0_PSEAE Probable iron-sulfur protein OS=Pseudomonas aeruginosa (strain ATCC 15692 / PAO1 / 1C / PRS 101 / LMG 12228) GN=PA4131 PE=4 SV=1	1	6	6
	tr|Q9HX05|Q9HX05_PSEAE;tr|Q9I2C4|Q9I2C4_PSEAE			>tr|Q9HX05|Q9HX05_PSEAE Probable aldehyde dehydrogenase OS=Pseudomonas aeruginosa (strain ATCC 15692 / PAO1 / 1C / PRS 101 / LMG 12228) GN=PA4022 PE=3 SV=1;>tr|Q9I2C4|Q9I2C4_PSEAE NAD+ dependent aldehyde dehydrogenase ExaC OS=Pseudomonas aeruginosa (strain	2	5	5
	tr|Q9HX12|Q9HX12_PSEAE			>tr|Q9HX12|Q9HX12_PSEAE Uncharacterized protein OS=Pseudomonas aeruginosa (strain ATCC 15692 / PAO1 / 1C / PRS 101 / LMG 12228) GN=PA4015 PE=4 SV=1	1	1	1
	tr|Q9HX44|Q9HX44_PSEAE			>tr|Q9HX44|Q9HX44_PSEAE Probable acyl-CoA dehydrogenase OS=Pseudomonas aeruginosa (strain ATCC 15692 / PAO1 / 1C / PRS 101 / LMG 12228) GN=PA3972 PE=3 SV=1	1	2	2
	tr|Q9HXM5|Q9HXM5_PSEAE			>tr|Q9HXM5|Q9HXM5_PSEAE Inosine-5-monophosphate dehydrogenase OS=Pseudomonas aeruginosa (strain ATCC 15692 / PAO1 / 1C / PRS 101 / LMG 12228) GN=guaB PE=1 SV=1	1	2	2
	tr|Q9HY01|Q9HY01_PSEAE			>tr|Q9HY01|Q9HY01_PSEAE S-(hydroxymethyl)glutathione dehydrogenase OS=Pseudomonas aeruginosa (strain ATCC 15692 / PAO1 / 1C / PRS 101 / LMG 12228) GN=adhC PE=3 SV=1	1	2	2
	tr|Q9HY12|Q9HY12_PSEAE			>tr|Q9HY12|Q9HY12_PSEAE Uncharacterized protein OS=Pseudomonas aeruginosa (strain ATCC 15692 / PAO1 / 1C / PRS 101 / LMG 12228) GN=PA3614 PE=4 SV=1	1	1	1
	tr|Q9HY13|Q9HY13_PSEAE			>tr|Q9HY13|Q9HY13_PSEAE Uncharacterized protein OS=Pseudomonas aeruginosa (strain ATCC 15692 / PAO1 / 1C / PRS 101 / LMG 12228) GN=PA3613 PE=4 SV=1	1	9	9
	tr|Q9HY77|Q9HY77_PSEAE			>tr|Q9HY77|Q9HY77_PSEAE Glutaredoxin OS=Pseudomonas aeruginosa (strain ATCC 15692 / PAO1 / 1C / PRS 101 / LMG 12228) GN=PA3533 PE=3 SV=1	1	3	3
	tr|Q9HY79|Q9HY79_PSEAE			>tr|Q9HY79|Q9HY79_PSEAE Ferroxidase OS=Pseudomonas aeruginosa (strain ATCC 15692 / PAO1 / 1C / PRS 101 / LMG 12228) GN=bfrB PE=1 SV=1	1	2	2
	tr|Q9HY81|Q9HY81_PSEAE			>tr|Q9HY81|Q9HY81_PSEAE Probable peroxidase OS=Pseudomonas aeruginosa (strain ATCC 15692 / PAO1 / 1C / PRS 101 / LMG 12228) GN=PA3529 PE=1 SV=1	1	8	8
	tr|Q9HYC8|Q9HYC8_PSEAE			>tr|Q9HYC8|Q9HYC8_PSEAE Iron-sulfur cluster carrier protein OS=Pseudomonas aeruginosa (strain ATCC 15692 / PAO1 / 1C / PRS 101 / LMG 12228) GN=PA3481 PE=3 SV=1	1	1	1
	tr|Q9HYR5|Q9HYR5_PSEAE			>tr|Q9HYR5|Q9HYR5_PSEAE Probable short chain dehydrogenase OS=Pseudomonas aeruginosa (strain ATCC 15692 / PAO1 / 1C / PRS 101 / LMG 12228) GN=PA3330 PE=4 SV=1	1	1	1
	tr|Q9HYR6|Q9HYR6_PSEAE			>tr|Q9HYR6|Q9HYR6_PSEAE Uncharacterized protein OS=Pseudomonas aeruginosa (strain ATCC 15692 / PAO1 / 1C / PRS 101 / LMG 12228) GN=PA3329 PE=4 SV=1	1	2	2
	tr|Q9HYR7|Q9HYR7_PSEAE			>tr|Q9HYR7|Q9HYR7_PSEAE Probable FAD-dependent monooxygenase OS=Pseudomonas aeruginosa (strain ATCC 15692 / PAO1 / 1C / PRS 101 / LMG 12228) GN=PA3328 PE=4 SV=1	1	1	1
	tr|Q9HYR8|Q9HYR8_PSEAE			>tr|Q9HYR8|Q9HYR8_PSEAE Probable non-ribosomal peptide synthetase OS=Pseudomonas aeruginosa (strain ATCC 15692 / PAO1 / 1C / PRS 101 / LMG 12228) GN=PA3327 PE=4 SV=1	1	13	13
	tr|Q9HYT5|Q9HYT5_PSEAE			>tr|Q9HYT5|Q9HYT5_PSEAE Uncharacterized protein OS=Pseudomonas aeruginosa (strain ATCC 15692 / PAO1 / 1C / PRS 101 / LMG 12228) GN=PA3309 PE=3 SV=1	1	8	8
	tr|Q9HYZ6|Q9HYZ6_PSEAE			>tr|Q9HYZ6|Q9HYZ6_PSEAE Site-determining protein OS=Pseudomonas aeruginosa (strain ATCC 15692 / PAO1 / 1C / PRS 101 / LMG 12228) GN=minD PE=3 SV=1	1	1	1
	tr|Q9HZ78|Q9HZ78_PSEAE			>tr|Q9HZ78|Q9HZ78_PSEAE LPS biosynthesis protein WbpG OS=Pseudomonas aeruginosa (strain ATCC 15692 / PAO1 / 1C / PRS 101 / LMG 12228) GN=wbpG PE=4 SV=1	1	2	2
	tr|Q9HZC5|Q9HZC5_PSEAE			>tr|Q9HZC5|Q9HZC5_PSEAE Aminopeptidase N OS=Pseudomonas aeruginosa (strain ATCC 15692 / PAO1 / 1C / PRS 101 / LMG 12228) GN=pepN PE=4 SV=1	1	1	1
	tr|Q9HZK4|Q9HZK4_PSEAE			>tr|Q9HZK4|Q9HZK4_PSEAE Glyceraldehyde-3-phosphate dehydrogenase OS=Pseudomonas aeruginosa (strain ATCC 15692 / PAO1 / 1C / PRS 101 / LMG 12228) GN=PA3001 PE=3 SV=1	1	11	11
	tr|Q9I028|Q9I028_PSEAE			>tr|Q9I028|Q9I028_PSEAE Probable acyl-CoA dehydrogenase OS=Pseudomonas aeruginosa (strain ATCC 15692 / PAO1 / 1C / PRS 101 / LMG 12228) GN=PA2815 PE=4 SV=1	1	5	5
	tr|Q9I056|Q9I056_PSEAE			>tr|Q9I056|Q9I056_PSEAE Carboxypeptidase G2 OS=Pseudomonas aeruginosa (strain ATCC 15692 / PAO1 / 1C / PRS 101 / LMG 12228) GN=cpg2 PE=4 SV=1	1	1	1
	tr|Q9I0L4|Q9I0L4_PSEAE			>tr|Q9I0L4|Q9I0L4_PSEAE Isocitrate dehydrogenase OS=Pseudomonas aeruginosa (strain ATCC 15692 / PAO1 / 1C / PRS 101 / LMG 12228) GN=idh PE=4 SV=1	1	8	8
	tr|Q9I0L5|Q9I0L5_PSEAE			>tr|Q9I0L5|Q9I0L5_PSEAE Isocitrate dehydrogenase [NADP] OS=Pseudomonas aeruginosa (strain ATCC 15692 / PAO1 / 1C / PRS 101 / LMG 12228) GN=icd PE=3 SV=1	1	18	18
	tr|Q9I0T1|Q9I0T1_PSEAE			>tr|Q9I0T1|Q9I0T1_PSEAE Probable acyl-CoA thiolase OS=Pseudomonas aeruginosa (strain ATCC 15692 / PAO1 / 1C / PRS 101 / LMG 12228) GN=PA2553 PE=3 SV=1	1	7	7
	tr|Q9I0T2|Q9I0T2_PSEAE			>tr|Q9I0T2|Q9I0T2_PSEAE Probable acyl-CoA dehydrogenase OS=Pseudomonas aeruginosa (strain ATCC 15692 / PAO1 / 1C / PRS 101 / LMG 12228) GN=PA2552 PE=3 SV=1	1	1	1
	tr|Q9I1E8|Q9I1E8_PSEAE			>tr|Q9I1E8|Q9I1E8_PSEAE Uncharacterized protein OS=Pseudomonas aeruginosa (strain ATCC 15692 / PAO1 / 1C / PRS 101 / LMG 12228) GN=PA2330 PE=4 SV=1	1	1	1
	tr|Q9I1H3|Q9I1H3_PSEAE			>tr|Q9I1H3|Q9I1H3_PSEAE AmbE OS=Pseudomonas aeruginosa (strain ATCC 15692 / PAO1 / 1C / PRS 101 / LMG 12228) GN=ambE PE=4 SV=1	1	3	3
	tr|Q9I1H5|Q9I1H5_PSEAE			>tr|Q9I1H5|Q9I1H5_PSEAE Chitinase OS=Pseudomonas aeruginosa (strain ATCC 15692 / PAO1 / 1C / PRS 101 / LMG 12228) GN=chiC PE=3 SV=1	1	1	1
	tr|Q9I1N7|Q9I1N7_PSEAE			>tr|Q9I1N7|Q9I1N7_PSEAE PslB OS=Pseudomonas aeruginosa (strain ATCC 15692 / PAO1 / 1C / PRS 101 / LMG 12228) GN=pslB PE=3 SV=1	1	2	2
	tr|Q9I1Z6|Q9I1Z6_PSEAE			>tr|Q9I1Z6|Q9I1Z6_PSEAE Alcohol dehydrogenase (Zn-dependent) OS=Pseudomonas aeruginosa (strain ATCC 15692 / PAO1 / 1C / PRS 101 / LMG 12228) GN=PA2119 PE=3 SV=1	1	1	1
	tr|Q9I246|Q9I246_PSEAE			>tr|Q9I246|Q9I246_PSEAE Probable carbamoyl transferase OS=Pseudomonas aeruginosa (strain ATCC 15692 / PAO1 / 1C / PRS 101 / LMG 12228) GN=PA2069 PE=4 SV=1	1	4	4
	tr|Q9I2A9|Q9I2A9_PSEAE			>tr|Q9I2A9|Q9I2A9_PSEAE DhcB, dehydrocarnitine CoA transferase, subunit B OS=Pseudomonas aeruginosa (strain ATCC 15692 / PAO1 / 1C / PRS 101 / LMG 12228) GN=dhcB PE=4 SV=1	1	1	1
	tr|Q9I2R2|Q9I2R2_PSEAE			>tr|Q9I2R2|Q9I2R2_PSEAE Probable oxidoreductase OS=Pseudomonas aeruginosa (strain ATCC 15692 / PAO1 / 1C / PRS 101 / LMG 12228) GN=PA1833 PE=4 SV=1	1	2	2
	tr|Q9I2V3|Q9I2V3_PSEAE			>tr|Q9I2V3|Q9I2V3_PSEAE Uncharacterized protein OS=Pseudomonas aeruginosa (strain ATCC 15692 / PAO1 / 1C / PRS 101 / LMG 12228) GN=PA1789 PE=1 SV=1	1	2	2
	tr|Q9I2W9|Q9I2W9_PSEAE			>tr|Q9I2W9|Q9I2W9_PSEAE Phosphoenolpyruvate synthase OS=Pseudomonas aeruginosa (strain ATCC 15692 / PAO1 / 1C / PRS 101 / LMG 12228) GN=ppsA PE=3 SV=1	1	11	11
	tr|Q9I2Z1|Q9I2Z1_PSEAE			>tr|Q9I2Z1|Q9I2Z1_PSEAE Uncharacterized protein OS=Pseudomonas aeruginosa (strain ATCC 15692 / PAO1 / 1C / PRS 101 / LMG 12228) GN=PA1746 PE=4 SV=1	1	2	2
	tr|Q9I363|Q9I363_PSEAE			>tr|Q9I363|Q9I363_PSEAE Probable ClpA/B-type protease OS=Pseudomonas aeruginosa (strain ATCC 15692 / PAO1 / 1C / PRS 101 / LMG 12228) GN=PA1662 PE=3 SV=1	1	1	1
	tr|Q9I3B2|Q9I3B2_PSEAE			>tr|Q9I3B2|Q9I3B2_PSEAE Beta-ketoacyl-ACP synthase I OS=Pseudomonas aeruginosa (strain ATCC 15692 / PAO1 / 1C / PRS 101 / LMG 12228) GN=fabB PE=3 SV=1	1	3	3
	tr|Q9I3D3|Q9I3D3_PSEAE			>tr|Q9I3D3|Q9I3D3_PSEAE 2-oxoglutarate dehydrogenase (E1 subunit) OS=Pseudomonas aeruginosa (strain ATCC 15692 / PAO1 / 1C / PRS 101 / LMG 12228) GN=sucA PE=4 SV=1	1	17	17
	tr|Q9I3D4|Q9I3D4_PSEAE			>tr|Q9I3D4|Q9I3D4_PSEAE Succinate dehydrogenase (B subunit) OS=Pseudomonas aeruginosa (strain ATCC 15692 / PAO1 / 1C / PRS 101 / LMG 12228) GN=sdhB PE=4 SV=1	1	5	5
	tr|Q9I3D5|Q9I3D5_PSEAE			>tr|Q9I3D5|Q9I3D5_PSEAE Succinate dehydrogenase flavoprotein subunit OS=Pseudomonas aeruginosa (strain ATCC 15692 / PAO1 / 1C / PRS 101 / LMG 12228) GN=sdhA PE=3 SV=1	1	15	15
	tr|Q9I3G0|Q9I3G0_PSEAE			>tr|Q9I3G0|Q9I3G0_PSEAE Cytochrome c oxidase, cbb3-type, CcoN subunit OS=Pseudomonas aeruginosa (strain ATCC 15692 / PAO1 / 1C / PRS 101 / LMG 12228) GN=ccoN2 PE=3 SV=1	1	1	1
	tr|Q9I3G1|Q9I3G1_PSEAE;tr|Q9I3G4|Q9I3G4_PSEAE			>tr|Q9I3G1|Q9I3G1_PSEAE Cytochrome c oxidase, cbb3-type, CcoO subunit OS=Pseudomonas aeruginosa (strain ATCC 15692 / PAO1 / 1C / PRS 101 / LMG 12228) GN=ccoO2 PE=4 SV=1	2	4	4
	tr|Q9I3G2|Q9I3G2_PSEAE			>tr|Q9I3G2|Q9I3G2_PSEAE Cbb3-type cytochrome c oxidase subunit OS=Pseudomonas aeruginosa (strain ATCC 15692 / PAO1 / 1C / PRS 101 / LMG 12228) GN=ccoP2 PE=3 SV=1	1	6	6
	tr|Q9I3G3|Q9I3G3_PSEAE			>tr|Q9I3G3|Q9I3G3_PSEAE Cytochrome c oxidase, cbb3-type, CcoN subunit OS=Pseudomonas aeruginosa (strain ATCC 15692 / PAO1 / 1C / PRS 101 / LMG 12228) GN=ccoN1 PE=3 SV=1	1	1	1
	tr|Q9I3G6|Q9I3G6_PSEAE			>tr|Q9I3G6|Q9I3G6_PSEAE Probable ferredoxin OS=Pseudomonas aeruginosa (strain ATCC 15692 / PAO1 / 1C / PRS 101 / LMG 12228) GN=PA1551 PE=4 SV=1	1	2	2
	tr|Q9I3H0|Q9I3H0_PSEAE			>tr|Q9I3H0|Q9I3H0_PSEAE Uncharacterized protein OS=Pseudomonas aeruginosa (strain ATCC 15692 / PAO1 / 1C / PRS 101 / LMG 12228) GN=PA1547 PE=4 SV=1	1	1	1
	tr|Q9I3L4|Q9I3L4_PSEAE			>tr|Q9I3L4|Q9I3L4_PSEAE Pyruvate kinase OS=Pseudomonas aeruginosa (strain ATCC 15692 / PAO1 / 1C / PRS 101 / LMG 12228) GN=pykF PE=3 SV=1	1	1	1
	tr|Q9I3X2|Q9I3X2_PSEAE			>tr|Q9I3X2|Q9I3X2_PSEAE Uncharacterized protein OS=Pseudomonas aeruginosa (strain ATCC 15692 / PAO1 / 1C / PRS 101 / LMG 12228) GN=PA1372 PE=4 SV=1	1	1	1
	tr|Q9I4I1|Q9I4I1_PSEAE			>tr|Q9I4I1|Q9I4I1_PSEAE Ribonucleoside-diphosphate reductase OS=Pseudomonas aeruginosa (strain ATCC 15692 / PAO1 / 1C / PRS 101 / LMG 12228) GN=nrdA PE=3 SV=1	1	5	5
	tr|Q9I4I2|Q9I4I2_PSEAE			>tr|Q9I4I2|Q9I4I2_PSEAE Ribonucleoside-diphosphate reductase subunit beta OS=Pseudomonas aeruginosa (strain ATCC 15692 / PAO1 / 1C / PRS 101 / LMG 12228) GN=nrdB PE=3 SV=1	1	2	2
	tr|Q9I4X1|Q9I4X1_PSEAE			>tr|Q9I4X1|Q9I4X1_PSEAE PqsC OS=Pseudomonas aeruginosa (strain ATCC 15692 / PAO1 / 1C / PRS 101 / LMG 12228) GN=pqsC PE=1 SV=1	1	4	4
	tr|Q9I4X2|Q9I4X2_PSEAE			>tr|Q9I4X2|Q9I4X2_PSEAE PqsB OS=Pseudomonas aeruginosa (strain ATCC 15692 / PAO1 / 1C / PRS 101 / LMG 12228) GN=pqsB PE=1 SV=1	1	1	1
	tr|Q9I522|Q9I522_PSEAE			>tr|Q9I522|Q9I522_PSEAE Lipopolysaccharide biosynthetic protein LpxO2 OS=Pseudomonas aeruginosa (strain ATCC 15692 / PAO1 / 1C / PRS 101 / LMG 12228) GN=lpxO2 PE=4 SV=1	1	1	1
	tr|Q9I5E3|Q9I5E3_PSEAE			>tr|Q9I5E3|Q9I5E3_PSEAE Citrate synthase OS=Pseudomonas aeruginosa (strain ATCC 15692 / PAO1 / 1C / PRS 101 / LMG 12228) GN=prpC PE=3 SV=1	1	2	2
	tr|Q9I5F6|Q9I5F6_PSEAE			>tr|Q9I5F6|Q9I5F6_PSEAE Bifunctional protein PutA OS=Pseudomonas aeruginosa (strain ATCC 15692 / PAO1 / 1C / PRS 101 / LMG 12228) GN=putA PE=3 SV=1	1	7	7
	tr|Q9I5U9|Q9I5U9_PSEAE			>tr|Q9I5U9|Q9I5U9_PSEAE Uncharacterized protein OS=Pseudomonas aeruginosa (strain ATCC 15692 / PAO1 / 1C / PRS 101 / LMG 12228) GN=PA0588 PE=4 SV=1	1	16	16
	tr|Q9I5Y8|Q9I5Y8_PSEAE			>tr|Q9I5Y8|Q9I5Y8_PSEAE Transketolase OS=Pseudomonas aeruginosa (strain ATCC 15692 / PAO1 / 1C / PRS 101 / LMG 12228) GN=tktA PE=1 SV=1	1	2	2
	tr|Q9I612|Q9I612_PSEAE			>tr|Q9I612|Q9I612_PSEAE Probable acyl-CoA dehydrogenase OS=Pseudomonas aeruginosa (strain ATCC 15692 / PAO1 / 1C / PRS 101 / LMG 12228) GN=PA0506 PE=3 SV=1	1	2	2
	tr|Q9I659|Q9I659_PSEAE			>tr|Q9I659|Q9I659_PSEAE Probable ClpA/B protease ATP binding subunit OS=Pseudomonas aeruginosa (strain ATCC 15692 / PAO1 / 1C / PRS 101 / LMG 12228) GN=PA0459 PE=4 SV=1	1	10	10
	tr|Q9I671|Q9I671_PSEAE			>tr|Q9I671|Q9I671_PSEAE Glutaryl-CoA dehydrogenase OS=Pseudomonas aeruginosa (strain ATCC 15692 / PAO1 / 1C / PRS 101 / LMG 12228) GN=gcdH PE=3 SV=1	1	5	5
	tr|Q9I672|Q9I672_PSEAE			>tr|Q9I672|Q9I672_PSEAE Uncharacterized protein OS=Pseudomonas aeruginosa (strain ATCC 15692 / PAO1 / 1C / PRS 101 / LMG 12228) GN=PA0446 PE=4 SV=1	1	1	1
	tr|Q9I687|Q9I687_PSEAE			>tr|Q9I687|Q9I687_PSEAE Methylenetetrahydrofolate reductase OS=Pseudomonas aeruginosa (strain ATCC 15692 / PAO1 / 1C / PRS 101 / LMG 12228) GN=metF PE=3 SV=1	1	1	1
	tr|Q9I689|Q9I689_PSEAE			>tr|Q9I689|Q9I689_PSEAE ATP-dependent RNA helicase RhlE OS=Pseudomonas aeruginosa (strain ATCC 15692 / PAO1 / 1C / PRS 101 / LMG 12228) GN=rhlE PE=3 SV=1	1	1	1
	tr|Q9I6A0|Q9I6A0_PSEAE			>tr|Q9I6A0|Q9I6A0_PSEAE Probable cystathionine gamma-lyase OS=Pseudomonas aeruginosa (strain ATCC 15692 / PAO1 / 1C / PRS 101 / LMG 12228) GN=PA0400 PE=3 SV=1	1	1	1
	tr|Q9I6H5|Q9I6H5_PSEAE			>tr|Q9I6H5|Q9I6H5_PSEAE D-3-phosphoglycerate dehydrogenase OS=Pseudomonas aeruginosa (strain ATCC 15692 / PAO1 / 1C / PRS 101 / LMG 12228) GN=serA PE=3 SV=1	1	4	4
	tr|Q9I6J2|Q9I6J2_PSEAE			>tr|Q9I6J2|Q9I6J2_PSEAE Putrescine aminotransferase OS=Pseudomonas aeruginosa (strain ATCC 15692 / PAO1 / 1C / PRS 101 / LMG 12228) GN=spuC PE=3 SV=1	1	3	3
	tr|Q9I6M3|Q9I6M3_PSEAE			>tr|Q9I6M3|Q9I6M3_PSEAE Uncharacterized protein OS=Pseudomonas aeruginosa (strain ATCC 15692 / PAO1 / 1C / PRS 101 / LMG 12228) GN=PA0267 PE=4 SV=1	1	1	1
	tr|Q9I6Z1|Q9I6Z1_PSEAE			>tr|Q9I6Z1|Q9I6Z1_PSEAE Uncharacterized protein OS=Pseudomonas aeruginosa (strain ATCC 15692 / PAO1 / 1C / PRS 101 / LMG 12228) GN=PA0141 PE=4 SV=1	1	4	4
	tr|Q9I6Z3|Q9I6Z3_PSEAE			>tr|Q9I6Z3|Q9I6Z3_PSEAE Alkyl hydroperoxide reductase subunit C OS=Pseudomonas aeruginosa (strain ATCC 15692 / PAO1 / 1C / PRS 101 / LMG 12228) GN=ahpC PE=4 SV=1	1	5	5
	tr|Q9I748|Q9I748_PSEAE			>tr|Q9I748|Q9I748_PSEAE Uncharacterized protein OS=Pseudomonas aeruginosa (strain ATCC 15692 / PAO1 / 1C / PRS 101 / LMG 12228) GN=PA0084 PE=4 SV=1	1	3	3
	tr|Q9I762|Q9I762_PSEAE			>tr|Q9I762|Q9I762_PSEAE Uncharacterized protein OS=Pseudomonas aeruginosa (strain ATCC 15692 / PAO1 / 1C / PRS 101 / LMG 12228) GN=PA0070 PE=4 SV=1	1	1	1

## Sheet: 4-2 proteinGroups C4HSL-1
Protein IDs	Majority protein IDs	Peptide counts (all)	Peptide counts (razor+unique)	Peptide counts (unique)	Fasta headers	Number of proteins	Peptides	Razor + unique peptides	Unique peptides	Sequence coverage [%]	Unique + razor sequence coverage [%]	Unique sequence coverage [%]	Mol. weight [kDa]	Sequence length	Sequence lengths	Q-value	Score	Intensity	MS/MS Count	Only identified by site	Reverse	Potential contaminant	id	Peptide IDs	Peptide is razor	Mod. peptide IDs	Evidence IDs	MS/MS IDs	Best MS/MS	Oxidation (M) site IDs	Oxidation (M) site positions
CON__P00761	CON__P00761	4	4	4	>P00761 SWISS-PROT:P00761|TRYP_PIG Trypsin - Sus scrofa (Pig).	1	4	4	4	25.1	25.1	25.1	24.409	231	231	0	55.512	925480000	57			+	0	380;470;528;794	True;True;True;True	383;473;531;800	664;665;666;667;838;839;840;841;842;843;844;845;942;943;1428;1429;1430;1431;1432;1433;1434;1435;1436;1437;1438	1292;1293;1294;1295;1296;1297;1298;1627;1628;1629;1630;1631;1632;1633;1634;1635;1636;1637;1638;1639;1640;1641;1642;1643;1644;1645;1646;1647;1648;1649;1650;1651;1652;1653;1654;1655;1656;1657;1841;1842;1843;1844;2741;2742;2743;2744;2745;2746;2747;2748;2749;2750;2751;2752;2753;2754;2755	1295;1646;1844;2745
CON__Streptavidin	CON__Streptavidin	6	6	6	>Streptavidin (S.avidinii)	1	6	6	6	45.6	45.6	45.6	16.622	160	160	0	106.4	1329800000	99			+	1	403;404;601;717;892;893	True;True;True;True;True;True	406;407;606;723;898;899	706;707;708;709;710;711;712;713;714;715;716;717;718;719;720;721;722;723;724;725;726;1081;1082;1083;1084;1085;1086;1087;1088;1089;1090;1091;1092;1093;1287;1288;1289;1290;1291;1292;1593;1594;1595;1596	1366;1367;1368;1369;1370;1371;1372;1373;1374;1375;1376;1377;1378;1379;1380;1381;1382;1383;1384;1385;1386;1387;1388;1389;1390;1391;1392;1393;1394;1395;1396;1397;1398;1399;1400;1401;1402;1403;1404;1405;1406;1407;1408;1409;1410;1411;1412;1413;1414;1415;1416;1417;1418;1419;1420;1421;1422;1423;1424;1425;1426;1427;1428;2113;2114;2115;2116;2117;2118;2119;2120;2121;2122;2123;2124;2125;2126;2447;2448;2449…	1399;1412;2118;2448;2985;2994
REV__tr|Q9HTC7|Q9HTC7_PSEAE	REV__tr|Q9HTC7|Q9HTC7_PSEAE	1	1	1	>tr|Q9HTC7|Q9HTC7_PSEAE Glucose-6-phosphate 1-dehydrogenase OS=Pseudomonas aeruginosa (strain ATCC 15692 / PAO1 / 1C / PRS 101 / LMG 12228) GN=zwf PE=3 SV=1	1	1	1	1	0	0	0	54.591	488	488	0.0098039	5.6624	5616800	1		+		2	510	TRUE	513	915	1803	1803
REV__tr|Q9HXW2|Q9HXW2_PSEAE	REV__tr|Q9HXW2|Q9HXW2_PSEAE	1	1	1	>tr|Q9HXW2|Q9HXW2_PSEAE Probable transcriptional regulator OS=Pseudomonas aeruginosa (strain ATCC 15692 / PAO1 / 1C / PRS 101 / LMG 12228) GN=PA3678 PE=4 SV=1	1	1	1	1	0	0	0	23.15	212	212	0.005	5.825	169830000	6		+		3	440	TRUE	443	793;794;795;796	1541;1542;1543;1544;1545;1546	1541
sp|G3XD23|WBPB_PSEAE	sp|G3XD23|WBPB_PSEAE	4	4	4	>sp|G3XD23|WBPB_PSEAE UDP-N-acetyl-2-amino-2-deoxy-D-glucuronate oxidase OS=Pseudomonas aeruginosa (strain ATCC 15692 / PAO1 / 1C / PRS 101 / LMG 12228) GN=wbpB PE=1 SV=1	1	4	4	4	17.4	17.4	17.4	35.717	316	316	0	26.729	24605000	9				4	1;437;548;672	True;True;True;True	1;440;551;677	1;790;977;978;1206;1207	1;1536;1537;1922;1923;1924;2320;2321;2322	1;1536;1923;2320
sp|G3XD61|WBPI_PSEAE	sp|G3XD61|WBPI_PSEAE	4	4	4	>sp|G3XD61|WBPI_PSEAE UDP-2,3-diacetamido-2,3-dideoxy-D-glucuronate 2-epimerase OS=Pseudomonas aeruginosa (strain ATCC 15692 / PAO1 / 1C / PRS 101 / LMG 12228) GN=wbpI PE=1 SV=1	1	4	4	4	19.2	19.2	19.2	38.907	354	354	0	35.615	31085000	8				5	119;421;483;748	True;True;True;True	120;424;486;754	201;202;753;754;869;1353	418;419;420;1473;1474;1475;1710;2615	420;1473;1710;2615
sp|G3XD76|DAPD_PSEAE	sp|G3XD76|DAPD_PSEAE	1	1	1	>sp|G3XD76|DAPD_PSEAE 2,3,4,5-tetrahydropyridine-2,6-dicarboxylate N-succinyltransferase OS=Pseudomonas aeruginosa (strain ATCC 15692 / PAO1 / 1C / PRS 101 / LMG 12228) GN=dapD PE=1 SV=1	1	1	1	1	3.5	3.5	3.5	35.973	344	344	0	5.9978	6966000	1				6	294	TRUE	297	512	1043	1043
sp|G3XD94|UGND_PSEAE	sp|G3XD94|UGND_PSEAE	3	3	3	>sp|G3XD94|UGND_PSEAE UDP-N-acetyl-D-glucosamine 6-dehydrogenase OS=Pseudomonas aeruginosa (strain ATCC 15692 / PAO1 / 1C / PRS 101 / LMG 12228) GN=wbpA PE=1 SV=1	1	3	3	3	9.2	9.2	9.2	48.155	436	436	0	19.309	18374000	5				7	126;216;855	True;True;True	127;218;861	213;385;386;1537	436;437;816;817;2904	436;817;2904
sp|O30508|ARUC_PSEAE	sp|O30508|ARUC_PSEAE	1	1	1	>sp|O30508|ARUC_PSEAE Succinylornithine transaminase/acetylornithine aminotransferase OS=Pseudomonas aeruginosa (strain ATCC 15692 / PAO1 / 1C / PRS 101 / LMG 12228) GN=aruC PE=1 SV=2	1	1	1	1	4.7	4.7	4.7	43.747	406	406	0	6.3098	7357500	0				8	695	TRUE	700	1243;1244	2387;2388	2387
sp|O52759|RS4_PSEAE	sp|O52759|RS4_PSEAE	6	6	6	>sp|O52759|RS4_PSEAE 30S ribosomal protein S4 OS=Pseudomonas aeruginosa (strain ATCC 15692 / PAO1 / 1C / PRS 101 / LMG 12228) GN=rpsD PE=3 SV=2	1	6	6	6	25.2	25.2	25.2	23.277	206	206	0	46.907	55156000	13				9	64;424;455;525;661;801	True;True;True;True;True;True	65;427;458;528;666;807	118;119;760;818;938;1191;1450	271;272;273;274;275;276;277;1487;1589;1832;1833;2298;2770	271;1487;1589;1832;2298;2770
sp|O52760|RPOA_PSEAE	sp|O52760|RPOA_PSEAE	5	5	5	>sp|O52760|RPOA_PSEAE DNA-directed RNA polymerase subunit alpha OS=Pseudomonas aeruginosa (strain ATCC 15692 / PAO1 / 1C / PRS 101 / LMG 12228) GN=rpoA PE=3 SV=2	1	5	5	5	17.7	17.7	17.7	36.649	333	333	0	38.345	23161000	9				10	26;343;520;588;701	True;True;True;True;True	26;346;523;592;706	37;604;931;932;1048;1255;1256;1257	56;57;58;1189;1825;1826;2059;2404;2405;2406	58;1189;1826;2059;2404
sp|O52761|RL17_PSEAE	sp|O52761|RL17_PSEAE	1	1	1	>sp|O52761|RL17_PSEAE 50S ribosomal protein L17 OS=Pseudomonas aeruginosa (strain ATCC 15692 / PAO1 / 1C / PRS 101 / LMG 12228) GN=rplQ PE=3 SV=1	1	1	1	1	13.2	13.2	13.2	14.504	129	129	0	6.849	12859000	4				11	85	TRUE	86	155;156	335;336;337;338	338
sp|O52762|CATA_PSEAE	sp|O52762|CATA_PSEAE	9	9	9	>sp|O52762|CATA_PSEAE Catalase OS=Pseudomonas aeruginosa (strain ATCC 15692 / PAO1 / 1C / PRS 101 / LMG 12228) GN=katA PE=1 SV=1	1	9	9	9	28.4	28.4	28.4	55.588	482	482	0	88.584	74506000	18				12	261;267;316;319;326;461;606;768;907	True;True;True;True;True;True;True;True;True	264;270;319;322;329;464;611;774;913	456;468;552;553;556;557;569;824;825;1099;1382;1619	945;973;1105;1106;1107;1108;1109;1112;1113;1114;1133;1597;1598;1599;1600;2133;2668;3038	945;973;1107;1113;1133;1597;2133;2668;3038
sp|O54439|ACP1_PSEAE	sp|O54439|ACP1_PSEAE	3	3	3	>sp|O54439|ACP1_PSEAE Acyl carrier protein 1 OS=Pseudomonas aeruginosa (strain ATCC 15692 / PAO1 / 1C / PRS 101 / LMG 12228) GN=acpP1 PE=3 SV=4	1	3	3	3	35.9	35.9	35.9	8.7406	78	78	0	27.793	35265000	8				13	22;417;418	True;True;True	22;420;421	32;745;746;747;748;749	49;50;1462;1463;1464;1465;1466;1467	50;1462;1467
sp|O68822|AMPA_PSEAE	sp|O68822|AMPA_PSEAE	13	13	13	>sp|O68822|AMPA_PSEAE Cytosol aminopeptidase OS=Pseudomonas aeruginosa (strain ATCC 15692 / PAO1 / 1C / PRS 101 / LMG 12228) GN=pepA PE=3 SV=1	1	13	13	13	32.1	32.1	32.1	52.331	495	495	0	110.13	153340000	39				14	122;174;202;273;302;306;307;432;492;504;505;815;816	True;True;True;True;True;True;True;True;True;True;True;True;True	123;176;204;276;305;309;310;435;495;507;508;821;822	205;206;307;361;362;477;478;528;529;537;538;539;540;780;886;905;906;907;908;1470;1471;1472;1473	423;424;425;680;772;773;774;775;986;987;988;1070;1071;1072;1085;1086;1087;1088;1089;1090;1091;1517;1750;1779;1780;1781;1782;1783;1784;1785;1786;1787;1788;1789;1790;2802;2803;2804;2805	424;680;774;988;1070;1086;1089;1517;1750;1782;1789;2802;2804
sp|O69754|PHZF_PSEAE	sp|O69754|PHZF_PSEAE	1	1	1	>sp|O69754|PHZF_PSEAE Trans-2,3-dihydro-3-hydroxyanthranilate isomerase OS=Pseudomonas aeruginosa (strain ATCC 15692 / PAO1 / 1C / PRS 101 / LMG 12228) GN=phzF1 PE=3 SV=2	1	1	1	1	9.7	9.7	9.7	30.342	278	278	0	7.5556	14277000	5				15	565	TRUE	569	1006;1007	1989;1990;1991;1992;1993	1993
sp|O82850|RS2_PSEAE	sp|O82850|RS2_PSEAE	3	3	3	>sp|O82850|RS2_PSEAE 30S ribosomal protein S2 OS=Pseudomonas aeruginosa (strain ATCC 15692 / PAO1 / 1C / PRS 101 / LMG 12228) GN=rpsB PE=3 SV=2	1	3	3	3	13.8	13.8	13.8	27.336	246	246	0	24.577	48471000	14				16	620;758;882	True;True;True	625;764;888	1120;1368;1369;1576;1577	2171;2633;2634;2635;2636;2637;2638;2639;2640;2641;2955;2956;2957;2958	2171;2637;2955
sp|O82851|EFTS_PSEAE	sp|O82851|EFTS_PSEAE	2	2	2	>sp|O82851|EFTS_PSEAE Elongation factor Ts OS=Pseudomonas aeruginosa (strain ATCC 15692 / PAO1 / 1C / PRS 101 / LMG 12228) GN=tsf PE=3 SV=1	1	2	2	2	9.7	9.7	9.7	30.653	289	289	0	11.917	8386400	4				17	21;249	True;True	21;252	31;436;437	48;909;910;911	48;909
sp|O86428|ILVE_PSEAE	sp|O86428|ILVE_PSEAE	1	1	1	>sp|O86428|ILVE_PSEAE Branched-chain-amino-acid aminotransferase OS=Pseudomonas aeruginosa (strain ATCC 15692 / PAO1 / 1C / PRS 101 / LMG 12228) GN=ilvE PE=1 SV=2	1	1	1	1	3.9	3.9	3.9	34.084	307	307	0	9.7694	7192100	1				18	131	TRUE	132	220	458	458
sp|P04739|FMPO_PSEAE	sp|P04739|FMPO_PSEAE	2	2	2	>sp|P04739|FMPO_PSEAE Fimbrial protein OS=Pseudomonas aeruginosa (strain ATCC 15692 / PAO1 / 1C / PRS 101 / LMG 12228) GN=pilA PE=1 SV=1	1	2	2	2	15.4	15.4	15.4	15.512	149	149	0	15.232	22423000	7				19	676;677	True;True	681;682	1214;1215;1216;1217	2334;2335;2336;2337;2338;2339;2340	2335;2338
sp|P07345|TRPB_PSEAE	sp|P07345|TRPB_PSEAE	1	1	1	>sp|P07345|TRPB_PSEAE Tryptophan synthase beta chain OS=Pseudomonas aeruginosa (strain ATCC 15692 / PAO1 / 1C / PRS 101 / LMG 12228) GN=trpB PE=3 SV=2	1	1	1	1	4.7	4.7	4.7	43.68	402	402	0.0049261	5.7079	848930	0				20	242	TRUE	245	427	895	895
sp|P08308|OTCC_PSEAE	sp|P08308|OTCC_PSEAE	9	9	9	>sp|P08308|OTCC_PSEAE Ornithine carbamoyltransferase, catabolic OS=Pseudomonas aeruginosa (strain ATCC 15692 / PAO1 / 1C / PRS 101 / LMG 12228) GN=arcB PE=1 SV=3	1	9	9	9	29.2	29.2	29.2	38.108	336	336	0	75.835	432770000	69				21	204;231;283;384;533;597;619;629;905	True;True;True;True;True;True;True;True;True	206;233;234;286;387;536;602;624;634;911	365;366;408;409;410;411;412;493;494;495;671;672;673;674;675;950;1075;1076;1118;1119;1137;1138;1139;1140;1141;1614;1615;1616	781;782;851;852;853;854;855;856;857;858;859;860;861;862;863;864;865;866;867;868;869;870;871;872;873;874;875;1011;1012;1013;1014;1015;1302;1303;1304;1305;1306;1307;1308;1309;1310;1311;1312;1313;1853;1854;2107;2108;2166;2167;2168;2169;2170;2200;2201;2202;2203;2204;2205;2206;2207;2208;2209;3022;3023;3024;3025;3026;3027	781;873;1012;1306;1854;2107;2168;2201;3023	0	146
sp|P09591|EFTU_PSEAE	sp|P09591|EFTU_PSEAE	24	24	24	>sp|P09591|EFTU_PSEAE Elongation factor Tu OS=Pseudomonas aeruginosa (strain ATCC 15692 / PAO1 / 1C / PRS 101 / LMG 12228) GN=tufA PE=1 SV=2	1	24	24	24	56.7	56.7	56.7	43.369	397	397	0	234.21	1614600000	290				22	17;36;37;55;56;105;138;139;153;154;193;301;303;318;339;535;536;593;653;654;774;779;853;854	True;True;True;True;True;True;True;True;True;True;True;True;True;True;True;True;True;True;True;True;True;True;True;True	17;36;37;55;56;57;106;139;140;154;155;156;195;304;306;321;342;538;539;597;598;658;659;780;785;859;860	25;26;55;56;57;58;59;60;61;94;95;96;97;98;99;100;101;102;103;104;105;106;183;232;233;234;262;263;264;265;266;267;268;269;270;343;344;525;526;527;530;531;532;533;534;555;587;588;589;590;591;592;593;594;595;596;597;598;599;953;954;955;956;957;1056;1057;1058;1059;1060;1061;1062;1063;1064;1065;1066;1067;1068;1069;1070;1178;1179;1180;1181;1391;1392;1393;1394;1402;1533;1534;1535;1536	34;35;36;37;38;39;40;90;91;92;93;94;95;96;97;98;99;100;101;102;103;104;105;106;107;108;109;110;183;184;185;186;187;188;189;190;191;192;193;194;195;196;197;198;199;200;201;202;203;204;205;206;207;208;209;210;211;212;213;214;215;216;217;218;219;220;221;222;223;224;225;226;227;228;229;230;231;232;233;234;235;236;237;238;239;240;241;242;243;244;245;246;247;248;249;250;251;252;390;491;492;493;494;495;…	37;101;109;186;248;390;491;499;576;606;744;1069;1073;1111;1168;1861;1873;2090;2273;2279;2684;2698;2900;2903	1;2;3;4	177;216;362;372
sp|P11221|OPRI_PSEAE	sp|P11221|OPRI_PSEAE	6	6	6	>sp|P11221|OPRI_PSEAE Major outer membrane lipoprotein OS=Pseudomonas aeruginosa (strain ATCC 15692 / PAO1 / 1C / PRS 101 / LMG 12228) GN=oprI PE=3 SV=1	1	6	6	6	50.6	50.6	50.6	8.8348	83	83	0	59.941	224730000	17				23	10;11;425;426;530;531	True;True;True;True;True;True	10;11;428;429;533;534	11;12;13;14;15;16;17;761;762;763;945;946;947;948	14;15;16;17;18;19;20;21;22;1488;1489;1490;1491;1847;1848;1849;1850;1851	17;19;1488;1489;1847;1850
sp|P13794|PORF_PSEAE	sp|P13794|PORF_PSEAE	7	7	7	>sp|P13794|PORF_PSEAE Outer membrane porin F OS=Pseudomonas aeruginosa (strain ATCC 15692 / PAO1 / 1C / PRS 101 / LMG 12228) GN=oprF PE=1 SV=1	1	7	7	7	24.3	24.3	24.3	37.639	350	350	0	56.718	97263000	21				24	169;215;621;656;796;825;845	True;True;True;True;True;True;True	171;217;626;661;802;831;851	293;294;381;382;383;384;1121;1122;1184;1185;1441;1442;1443;1489;1490;1522;1523	649;650;811;812;813;814;815;2172;2173;2174;2289;2290;2291;2758;2759;2760;2761;2831;2832;2881;2882	650;813;2174;2289;2760;2832;2881
sp|P13981|ARCA_PSEAE	sp|P13981|ARCA_PSEAE	26	26	26	>sp|P13981|ARCA_PSEAE Arginine deiminase OS=Pseudomonas aeruginosa (strain ATCC 15692 / PAO1 / 1C / PRS 101 / LMG 12228) GN=arcA PE=1 SV=2	1	26	26	26	52.6	52.6	52.6	46.435	418	418	0	272.99	925650000	170				25	49;146;158;180;181;197;218;226;296;297;298;412;413;427;430;431;445;524;633;639;641;659;727;740;741;866	True;True;True;True;True;True;True;True;True;True;True;True;True;True;True;True;True;True;True;True;True;True;True;True;True;True	49;147;160;182;183;199;220;228;299;300;301;415;416;430;433;434;448;527;638;644;646;664;733;746;747;872	82;83;247;248;249;278;279;316;317;318;319;320;321;322;349;350;351;388;398;399;400;401;402;515;516;517;518;519;520;736;737;738;739;740;764;765;766;772;773;774;775;776;777;778;779;803;804;936;937;1146;1147;1155;1156;1157;1158;1160;1161;1188;1189;1307;1308;1336;1337;1338;1339;1340;1341;1551;1552;1553	158;159;160;161;530;531;532;533;534;627;628;629;630;631;691;692;693;694;695;696;697;698;699;700;701;702;703;704;705;706;707;708;750;751;752;753;754;755;756;757;819;831;832;833;834;835;836;837;838;839;840;841;842;843;1047;1048;1049;1050;1051;1052;1053;1054;1055;1056;1057;1058;1059;1060;1061;1439;1440;1441;1442;1443;1444;1445;1446;1447;1448;1449;1450;1451;1492;1493;1494;1495;1501;1502;1503;1504;150…	159;530;631;699;707;757;819;832;1053;1060;1061;1439;1451;1492;1506;1512;1564;1831;2217;2227;2240;2295;2490;2571;2595;2925
sp|P13982|ARCC_PSEAE	sp|P13982|ARCC_PSEAE	3	3	3	>sp|P13982|ARCC_PSEAE Carbamate kinase OS=Pseudomonas aeruginosa (strain ATCC 15692 / PAO1 / 1C / PRS 101 / LMG 12228) GN=arcC PE=3 SV=1	1	3	3	3	14.2	14.2	14.2	33.08	310	310	0	20.049	4963800	4				26	53;112;473	True;True;True	53;113;476	89;192;849	176;403;404;1661	176;404;1661
sp|P14165|CISY_PSEAE	sp|P14165|CISY_PSEAE	6	6	6	>sp|P14165|CISY_PSEAE Citrate synthase OS=Pseudomonas aeruginosa (strain ATCC 15692 / PAO1 / 1C / PRS 101 / LMG 12228) GN=gltA PE=3 SV=2	1	6	6	6	17.8	17.8	17.8	47.694	428	428	0	48.527	50881000	15				27	58;142;279;572;585;626	True;True;True;True;True;True	59;143;282;576;589;631	108;109;241;487;1017;1018;1019;1020;1043;1044;1133	254;255;256;257;258;519;1003;2009;2010;2011;2012;2013;2053;2054;2055;2196	256;519;1003;2012;2053;2196
sp|P30718|CH60_PSEAE	sp|P30718|CH60_PSEAE	24	24	24	>sp|P30718|CH60_PSEAE 60 kDa chaperonin OS=Pseudomonas aeruginosa (strain ATCC 15692 / PAO1 / 1C / PRS 101 / LMG 12228) GN=groL PE=1 SV=3	1	24	24	24	58.9	58.9	58.9	57.085	547	547	0	219.29	314830000	94				28	8;46;54;78;79;88;89;90;91;92;121;152;195;212;238;338;579;636;642;643;646;647;680;803	True;True;True;True;True;True;True;True;True;True;True;True;True;True;True;True;True;True;True;True;True;True;True;True	8;46;54;79;80;89;90;91;92;93;122;153;197;214;241;341;583;641;647;648;651;652;685;809	8;75;76;90;91;92;93;140;141;142;143;144;159;160;161;162;163;164;165;166;167;168;204;261;347;376;377;421;585;586;1031;1032;1033;1151;1162;1163;1164;1167;1168;1169;1221;1453;1454	10;11;135;136;137;138;139;140;141;142;143;144;145;146;147;148;149;150;151;152;177;178;179;180;181;182;314;315;316;317;318;319;320;321;322;341;342;343;344;345;346;347;348;349;350;351;352;353;354;355;356;357;358;359;360;361;362;363;364;365;422;554;555;748;801;802;803;804;805;886;1160;1161;1162;1163;1164;2029;2030;2031;2032;2033;2034;2035;2221;2242;2243;2244;2245;2246;2247;2248;2251;2252;2253;2346;2…	10;140;179;317;321;342;347;360;361;363;422;554;748;805;886;1164;2034;2221;2243;2248;2251;2252;2346;2773
sp|P37798|ACCC_PSEAE	sp|P37798|ACCC_PSEAE	6	6	6	>sp|P37798|ACCC_PSEAE Biotin carboxylase OS=Pseudomonas aeruginosa (strain ATCC 15692 / PAO1 / 1C / PRS 101 / LMG 12228) GN=accC PE=1 SV=1	1	6	6	6	20.5	20.5	20.5	48.887	449	449	0	54.461	62313000	16				29	50;682;735;820;824;871	True;True;True;True;True;True	50;687;741;826;830;877	84;85;1224;1225;1325;1326;1480;1487;1488;1558	162;163;164;165;2355;2356;2357;2358;2359;2548;2549;2550;2821;2829;2830;2930	165;2358;2550;2821;2830;2930
sp|P37799|BCCP_PSEAE	sp|P37799|BCCP_PSEAE	7	7	7	>sp|P37799|BCCP_PSEAE Biotin carboxyl carrier protein of acetyl-CoA carboxylase OS=Pseudomonas aeruginosa (strain ATCC 15692 / PAO1 / 1C / PRS 101 / LMG 12228) GN=accB PE=3 SV=1	1	7	7	7	57.7	57.7	57.7	16.455	156	156	0	99.521	406820000	70				30	7;434;435;485;486;709;730	True;True;True;True;True;True;True	7;437;438;488;489;714;715;736	7;782;783;784;785;786;787;788;872;873;874;875;876;877;878;879;1269;1270;1271;1272;1273;1274;1311;1312;1313;1314;1315	8;9;1519;1520;1521;1522;1523;1524;1525;1526;1527;1528;1529;1530;1531;1532;1533;1717;1718;1719;1720;1721;1722;1723;1724;1725;1726;1727;1728;1729;1730;1731;1732;1733;1734;1735;1736;1737;1738;1739;1740;1741;1742;1743;2425;2426;2427;2428;2429;2430;2431;2499;2500;2501;2502;2503;2504;2505;2506;2507;2508;2509;2510;2511;2512;2513;2514;2515;2516;2517	9;1519;1528;1722;1742;2427;2512	5	87
sp|P38100|CARB_PSEAE	sp|P38100|CARB_PSEAE	2	2	2	>sp|P38100|CARB_PSEAE Carbamoyl-phosphate synthase large chain OS=Pseudomonas aeruginosa (strain ATCC 15692 / PAO1 / 1C / PRS 101 / LMG 12228) GN=carB PE=3 SV=3	1	2	2	2	3.8	3.8	3.8	117.33	1073	1073	0	14.919	2650100	4				31	177;515	True;True	179;518	313;924	686;687;688;1814	687;1814
sp|P43336|PHHC_PSEAE	sp|P43336|PHHC_PSEAE	2	2	2	>sp|P43336|PHHC_PSEAE Aromatic-amino-acid aminotransferase OS=Pseudomonas aeruginosa (strain ATCC 15692 / PAO1 / 1C / PRS 101 / LMG 12228) GN=phhC PE=3 SV=2	1	2	2	2	8	8	8	43.273	399	399	0	17.005	16394000	7				32	371;444	True;True	374;447	652;801;802	1274;1275;1557;1558;1559;1560;1561	1275;1560
sp|P47204|FTSZ_PSEAE	sp|P47204|FTSZ_PSEAE	2	2	2	>sp|P47204|FTSZ_PSEAE Cell division protein FtsZ OS=Pseudomonas aeruginosa (strain ATCC 15692 / PAO1 / 1C / PRS 101 / LMG 12228) GN=ftsZ PE=1 SV=2	1	2	2	2	7.9	7.9	7.9	41.218	394	394	0	15.37	677640	2				33	308;865	True;True	311;871	541;1550	1092;2921	1092;2921
sp|P48247|GSA_PSEAE	sp|P48247|GSA_PSEAE	3	3	3	>sp|P48247|GSA_PSEAE Glutamate-1-semialdehyde 2,1-aminomutase OS=Pseudomonas aeruginosa (strain ATCC 15692 / PAO1 / 1C / PRS 101 / LMG 12228) GN=hemL PE=1 SV=2	1	3	3	3	11.7	11.7	11.7	45.397	427	427	0	24.565	11158000	4				34	47;341;592	True;True;True	47;344;596	77;78;79;602;1055	153;154;155;1185;2068	154;1185;2068
sp|P50987|ARLY_PSEAE	sp|P50987|ARLY_PSEAE	1	1	1	>sp|P50987|ARLY_PSEAE Argininosuccinate lyase OS=Pseudomonas aeruginosa (strain ATCC 15692 / PAO1 / 1C / PRS 101 / LMG 12228) GN=argH PE=3 SV=2	1	1	1	1	2.8	2.8	2.8	51.64	464	464	0	11.174	5285100	2				35	802	TRUE	808	1451;1452	2771;2772	2772
sp|P53593|SUCC_PSEAE	sp|P53593|SUCC_PSEAE	14	14	14	>sp|P53593|SUCC_PSEAE Succinyl-CoA ligase [ADP-forming] subunit beta OS=Pseudomonas aeruginosa (strain ATCC 15692 / PAO1 / 1C / PRS 101 / LMG 12228) GN=sucC PE=3 SV=2	1	14	14	14	41	41	41	41.542	388	388	0	150.3	351240000	47				36	30;113;368;376;401;402;459;462;463;523;581;625;649;830	True;True;True;True;True;True;True;True;True;True;True;True;True;True	30;114;371;379;404;405;462;465;466;526;585;630;654;836	42;43;44;193;648;649;657;702;703;704;705;822;826;827;828;935;1035;1130;1131;1132;1171;1172;1173;1495;1496;1497;1498;1499	70;71;72;73;405;406;407;1269;1270;1280;1362;1363;1364;1365;1593;1594;1601;1602;1603;1604;1605;1829;2038;2191;2192;2193;2194;2195;2255;2256;2257;2258;2259;2260;2839;2840;2841;2842;2843;2844;2845;2846;2847;2848;2849;2850;2851;2852;2853	71;405;1269;1280;1362;1364;1593;1601;1605;1829;2038;2191;2256;2845
sp|P53641|SODF_PSEAE	sp|P53641|SODF_PSEAE	4	4	4	>sp|P53641|SODF_PSEAE Superoxide dismutase [Fe] OS=Pseudomonas aeruginosa (strain ATCC 15692 / PAO1 / 1C / PRS 101 / LMG 12228) GN=sodB PE=3 SV=3	1	4	4	4	25.4	25.4	25.4	21.351	193	193	0	33.495	50988000	15				37	32;694;772;911	True;True;True;True	32;699;778;917	47;48;49;1242;1387;1388;1625;1626	77;78;79;80;81;82;2386;2674;2675;2676;2677;2678;2679;3048;3049;3050	82;2386;2679;3048
sp|P57112|STHA_PSEAE	sp|P57112|STHA_PSEAE	4	4	4	>sp|P57112|STHA_PSEAE Soluble pyridine nucleotide transhydrogenase OS=Pseudomonas aeruginosa (strain ATCC 15692 / PAO1 / 1C / PRS 101 / LMG 12228) GN=sthA PE=1 SV=2	1	4	4	4	9.7	9.7	9.7	51.16	464	464	0	23.505	12885000	5				38	644;669;787;879	True;True;True;True	649;674;793;885	1165;1202;1416;1417;1571	2249;2313;2721;2722;2950	2249;2313;2722;2950
sp|P72173|AAT_PSEAE	sp|P72173|AAT_PSEAE	5	5	5	>sp|P72173|AAT_PSEAE Aspartate aminotransferase OS=Pseudomonas aeruginosa (strain ATCC 15692 / PAO1 / 1C / PRS 101 / LMG 12228) GN=aspC PE=3 SV=2	1	5	5	5	16.6	16.6	16.6	43.319	398	398	0	40.632	26802000	9				39	41;69;497;869;912	True;True;True;True;True	41;70;500;875;918	66;67;126;893;894;1556;1627	119;120;287;288;1762;1763;1764;2928;3051	120;287;1763;2928;3051
sp|P77915|HEMN_PSEAE	sp|P77915|HEMN_PSEAE	1	1	1	>sp|P77915|HEMN_PSEAE Oxygen-independent coproporphyrinogen-III oxidase OS=Pseudomonas aeruginosa (strain ATCC 15692 / PAO1 / 1C / PRS 101 / LMG 12228) GN=hemN PE=2 SV=2	1	1	1	1	2.6	2.6	2.6	52.488	460	460	0	6.4311	2917800	1				40	691	TRUE	696	1236	2373	2373
sp|Q51342|PUR1_PSEAE	sp|Q51342|PUR1_PSEAE	2	2	2	>sp|Q51342|PUR1_PSEAE Amidophosphoribosyltransferase OS=Pseudomonas aeruginosa (strain ATCC 15692 / PAO1 / 1C / PRS 101 / LMG 12228) GN=purF PE=3 SV=3	1	2	2	2	5.2	5.2	5.2	55.369	501	501	0	12.334	9188200	4				41	707;729	True;True	712;735	1266;1267;1310	2421;2422;2423;2498	2423;2498
sp|Q51422|SYDND_PSEAE	sp|Q51422|SYDND_PSEAE	4	4	4	>sp|Q51422|SYDND_PSEAE Aspartate--tRNA(Asp/Asn) ligase OS=Pseudomonas aeruginosa (strain ATCC 15692 / PAO1 / 1C / PRS 101 / LMG 12228) GN=aspS PE=1 SV=2	1	4	4	4	9.6	9.6	9.6	66.207	591	591	0	37.815	19853000	10				42	130;241;246;769	True;True;True;True	131;244;249;775	218;219;425;426;432;433;1383	454;455;456;457;893;894;905;906;2669;2670	454;894;906;2670
sp|Q51561|RPOB_PSEAE	sp|Q51561|RPOB_PSEAE	22	22	22	>sp|Q51561|RPOB_PSEAE DNA-directed RNA polymerase subunit beta OS=Pseudomonas aeruginosa (strain ATCC 15692 / PAO1 / 1C / PRS 101 / LMG 12228) GN=rpoB PE=3 SV=2	1	22	22	22	26.6	26.6	26.6	150.84	1357	1357	0	190.79	216260000	60				43	51;71;72;98;165;166;182;184;353;420;442;472;522;527;561;582;655;716;722;746;788;891	True;True;True;True;True;True;True;True;True;True;True;True;True;True;True;True;True;True;True;True;True;True	51;72;73;99;167;168;184;186;356;423;445;475;525;530;565;586;660;722;728;752;794;897	86;87;128;129;130;131;174;289;290;323;324;326;620;752;799;848;934;940;941;998;999;1036;1037;1038;1182;1183;1286;1300;1301;1348;1349;1350;1418;1419;1592	166;167;168;169;170;171;172;173;290;291;292;293;294;295;296;297;372;645;646;709;710;711;713;1215;1472;1555;1660;1828;1836;1837;1838;1839;1840;1980;1981;2039;2040;2041;2042;2043;2044;2045;2285;2286;2287;2288;2445;2446;2475;2476;2477;2478;2607;2608;2609;2610;2723;2724;2725;2982	172;290;295;372;645;646;711;713;1215;1472;1555;1660;1828;1839;1980;2045;2285;2446;2475;2607;2724;2982
sp|Q51567|SUCD_PSEAE	sp|Q51567|SUCD_PSEAE	9	9	9	>sp|Q51567|SUCD_PSEAE Succinyl-CoA ligase [ADP-forming] subunit alpha OS=Pseudomonas aeruginosa (strain ATCC 15692 / PAO1 / 1C / PRS 101 / LMG 12228) GN=sucD PE=3 SV=2	1	9	9	9	45.8	45.8	45.8	30.266	295	295	0	77.78	71965000	30				44	66;96;227;290;369;464;568;684;692	True;True;True;True;True;True;True;True;True	67;97;229;293;372;467;572;689;697	121;122;172;403;504;505;506;650;829;830;1012;1227;1237;1238;1239;1240	279;280;281;282;370;844;1030;1031;1032;1033;1271;1606;1607;1608;1609;1610;1611;2002;2361;2374;2375;2376;2377;2378;2379;2380;2381;2382;2383;2384	279;370;844;1030;1271;1610;2002;2361;2377
sp|Q59636|NDK_PSEAE	sp|Q59636|NDK_PSEAE	1	1	1	>sp|Q59636|NDK_PSEAE Nucleoside diphosphate kinase OS=Pseudomonas aeruginosa (strain ATCC 15692 / PAO1 / 1C / PRS 101 / LMG 12228) GN=ndk PE=3 SV=2	1	1	1	1	6.3	6.3	6.3	15.592	143	143	0	6.4673	0	2				45	635	TRUE	640	1149;1150	2219;2220	2220
sp|Q59637|ODP1_PSEAE	sp|Q59637|ODP1_PSEAE	25	25	25	>sp|Q59637|ODP1_PSEAE Pyruvate dehydrogenase E1 component OS=Pseudomonas aeruginosa (strain ATCC 15692 / PAO1 / 1C / PRS 101 / LMG 12228) GN=aceE PE=3 SV=2	1	25	25	25	29.8	29.8	29.8	99.563	882	882	0	175.05	180550000	60				46	4;34;151;155;168;192;265;266;268;317;379;408;545;558;583;607;611;657;660;685;705;738;834;872;884	True;True;True;True;True;True;True;True;True;True;True;True;True;True;True;True;True;True;True;True;True;True;True;True;True	4;34;152;157;170;194;268;269;271;320;382;411;548;562;587;612;616;662;665;690;710;744;840;878;890	4;52;260;271;272;273;292;341;342;464;465;466;467;469;470;554;661;662;663;730;972;993;1039;1040;1100;1101;1107;1186;1190;1228;1229;1262;1263;1334;1504;1559;1580;1581	4;85;553;616;617;618;619;620;648;739;740;741;742;963;964;965;966;967;968;969;970;971;972;974;975;1110;1288;1289;1290;1291;1432;1913;1962;1963;2046;2047;2134;2135;2136;2137;2138;2147;2148;2149;2292;2297;2362;2363;2364;2413;2414;2415;2416;2417;2565;2860;2931;2932;2961;2962;2963	4;85;553;617;648;740;964;972;974;1110;1290;1432;1913;1963;2046;2136;2149;2292;2297;2363;2415;2565;2860;2932;2961
sp|Q59638|ODP2_PSEAE	sp|Q59638|ODP2_PSEAE	8	8	8	>sp|Q59638|ODP2_PSEAE Dihydrolipoyllysine-residue acetyltransferase component of pyruvate dehydrogenase complex OS=Pseudomonas aeruginosa (strain ATCC 15692 / PAO1 / 1C / PRS 101 / LMG 12228) GN=aceF PE=2 SV=2	1	8	8	8	19.9	19.9	19.9	56.708	547	547	0	63.479	48068000	16				47	18;207;471;507;683;699;700;728	True;True;True;True;True;True;True;True	18;209;474;510;688;704;705;734	27;369;846;847;911;912;1226;1249;1250;1251;1252;1253;1254;1309	41;786;1658;1659;1799;1800;2360;2394;2395;2396;2397;2398;2399;2400;2401;2402;2403;2497	41;786;1659;1799;2360;2394;2402;2497
sp|Q59653|PYRB_PSEAE	sp|Q59653|PYRB_PSEAE	1	1	1	>sp|Q59653|PYRB_PSEAE Aspartate carbamoyltransferase OS=Pseudomonas aeruginosa (strain ATCC 15692 / PAO1 / 1C / PRS 101 / LMG 12228) GN=pyrB PE=3 SV=2	1	1	1	1	5.7	5.7	5.7	36.629	334	334	0	13.325	1303300	1				48	205	TRUE	207	367	783	783
sp|Q9HT16|ATPF_PSEAE	sp|Q9HT16|ATPF_PSEAE	2	2	2	>sp|Q9HT16|ATPF_PSEAE ATP synthase subunit b OS=Pseudomonas aeruginosa (strain ATCC 15692 / PAO1 / 1C / PRS 101 / LMG 12228) GN=atpF PE=3 SV=1	1	2	2	2	15.4	15.4	15.4	16.956	156	156	0	13.498	5017100	2				49	100;104	True;True	101;105	177;182	376;389	376;389
sp|Q9HT18|ATPA_PSEAE	sp|Q9HT18|ATPA_PSEAE	11	11	11	>sp|Q9HT18|ATPA_PSEAE ATP synthase subunit alpha OS=Pseudomonas aeruginosa (strain ATCC 15692 / PAO1 / 1C / PRS 101 / LMG 12228) GN=atpA PE=3 SV=1	1	11	11	11	25.5	25.5	25.5	55.393	514	514	0	90.051	153660000	37				50	176;284;359;389;587;608;645;720;721;732;817	True;True;True;True;True;True;True;True;True;True;True	178;287;362;392;591;613;650;726;727;738;823	309;310;311;312;496;633;634;680;681;1046;1047;1102;1166;1297;1298;1299;1318;1319;1474;1475;1476	682;683;684;685;1016;1017;1018;1248;1249;1318;1319;1320;1321;1322;1323;1324;2057;2058;2139;2250;2470;2471;2472;2473;2474;2520;2521;2522;2523;2806;2807;2808;2809;2810;2811;2812;2813	684;1017;1249;1319;2057;2139;2250;2470;2472;2521;2810
sp|Q9HT19|ATPG_PSEAE	sp|Q9HT19|ATPG_PSEAE	2	2	2	>sp|Q9HT19|ATPG_PSEAE ATP synthase gamma chain OS=Pseudomonas aeruginosa (strain ATCC 15692 / PAO1 / 1C / PRS 101 / LMG 12228) GN=atpG PE=3 SV=1	1	2	2	2	9.8	9.8	9.8	31.553	286	286	0	18.085	10211000	4				51	605;698	True;True	610;703	1097;1098;1248	2130;2131;2132;2393	2131;2393
sp|Q9HT20|ATPB_PSEAE	sp|Q9HT20|ATPB_PSEAE	13	13	13	>sp|Q9HT20|ATPB_PSEAE ATP synthase subunit beta OS=Pseudomonas aeruginosa (strain ATCC 15692 / PAO1 / 1C / PRS 101 / LMG 12228) GN=atpD PE=3 SV=1	1	13	13	13	43.2	43.2	43.2	49.499	458	458	0	160.18	135910000	43				52	148;150;252;333;398;584;618;648;687;780;792;812;910	True;True;True;True;True;True;True;True;True;True;True;True;True	149;151;255;336;401;588;623;653;692;786;798;818;916	251;252;256;257;258;259;442;443;577;698;699;1041;1042;1115;1116;1117;1170;1232;1403;1404;1425;1465;1466;1623;1624	536;537;538;539;540;546;547;548;549;550;551;552;918;919;920;1150;1355;1356;1357;1358;1359;2048;2049;2050;2051;2052;2162;2163;2164;2165;2254;2367;2368;2700;2701;2702;2737;2796;2797;3044;3045;3046;3047	540;551;918;1150;1358;2051;2163;2254;2367;2701;2737;2796;3045
sp|Q9HT95|ATSE4_PSEAE	sp|Q9HT95|ATSE4_PSEAE	2	2	2	>sp|Q9HT95|ATSE4_PSEAE Acetyltransferase PA5475 OS=Pseudomonas aeruginosa (strain ATCC 15692 / PAO1 / 1C / PRS 101 / LMG 12228) GN=PA5475 PE=3 SV=1	1	2	2	2	11.8	11.8	11.8	21	186	186	0	14.385	2337500	3				53	162;651	True;True	164;656	284;285;1176	638;639;2264	638;2264
sp|Q9HTD7|ASPA_PSEAE	sp|Q9HTD7|ASPA_PSEAE	4	4	4	>sp|Q9HTD7|ASPA_PSEAE Aspartate ammonia-lyase OS=Pseudomonas aeruginosa (strain ATCC 15692 / PAO1 / 1C / PRS 101 / LMG 12228) GN=aspA PE=3 SV=1	1	4	4	4	23.4	23.4	23.4	51.069	474	474	0	27.991	37110000	25				54	358;441;480;766	True;True;True;True	361;444;483;772	631;632;797;798;865;866;1379;1380	1244;1245;1246;1247;1547;1548;1549;1550;1551;1552;1553;1554;1699;1700;1701;1702;1703;1704;1705;1706;2660;2661;2662;2663;2664	1246;1547;1700;2660
sp|Q9HTF1|LTAE_PSEAE	sp|Q9HTF1|LTAE_PSEAE	1	1	1	>sp|Q9HTF1|LTAE_PSEAE Low specificity L-threonine aldolase OS=Pseudomonas aeruginosa (strain ATCC 15692 / PAO1 / 1C / PRS 101 / LMG 12228) GN=ltaE PE=3 SV=1	1	1	1	1	4.9	4.9	4.9	38.213	346	346	0	13.007	2828200	1				55	247	TRUE	250	434	907	907
sp|Q9HTN8|RL28_PSEAE	sp|Q9HTN8|RL28_PSEAE	1	1	1	>sp|Q9HTN8|RL28_PSEAE 50S ribosomal protein L28 OS=Pseudomonas aeruginosa (strain ATCC 15692 / PAO1 / 1C / PRS 101 / LMG 12228) GN=rpmB PE=3 SV=1	1	1	1	1	12.8	12.8	12.8	9.0655	78	78	0	7.4268	11202000	2				56	299	TRUE	302	521;522	1062;1063	1062
sp|Q9HTQ0|DADA1_PSEAE	sp|Q9HTQ0|DADA1_PSEAE	3	3	3	>sp|Q9HTQ0|DADA1_PSEAE D-amino acid dehydrogenase 1 OS=Pseudomonas aeruginosa (strain ATCC 15692 / PAO1 / 1C / PRS 101 / LMG 12228) GN=dadA1 PE=1 SV=1	1	3	3	3	10	10	10	47.139	432	432	0	17.85	18918000	3				57	756;764;810	True;True;True	762;770;816	1365;1377;1463	2630;2657;2658;2793	2630;2658;2793
sp|Q9HTV1|RHO_PSEAE	sp|Q9HTV1|RHO_PSEAE	1	1	1	>sp|Q9HTV1|RHO_PSEAE Transcription termination factor Rho OS=Pseudomonas aeruginosa (strain ATCC 15692 / PAO1 / 1C / PRS 101 / LMG 12228) GN=rho PE=3 SV=1	1	1	1	1	3.3	3.3	3.3	47.069	419	419	0	6.6358	4557600	1				58	390	TRUE	393	682	1325	1325
sp|Q9HTZ7|PCKA_PSEAE	sp|Q9HTZ7|PCKA_PSEAE	2	2	2	>sp|Q9HTZ7|PCKA_PSEAE Phosphoenolpyruvate carboxykinase [ATP] OS=Pseudomonas aeruginosa (strain ATCC 15692 / PAO1 / 1C / PRS 101 / LMG 12228) GN=pckA PE=3 SV=1	1	2	2	2	5.1	5.1	5.1	55.731	513	513	0	12.362	9186400	1				59	86;127	True;True	87;128	157;214	339;438	339;438
sp|Q9HU21|RMLC_PSEAE	sp|Q9HU21|RMLC_PSEAE	1	1	1	>sp|Q9HU21|RMLC_PSEAE dTDP-4-dehydrorhamnose 3,5-epimerase OS=Pseudomonas aeruginosa (strain ATCC 15692 / PAO1 / 1C / PRS 101 / LMG 12228) GN=rmlC PE=1 SV=1	1	1	1	1	6.6	6.6	6.6	20.766	181	181	0	7.4145	11779000	4				60	449	TRUE	452	809;810	1573;1574;1575;1576	1575
sp|Q9HU65|GLNA_PSEAE	sp|Q9HU65|GLNA_PSEAE	6	6	6	>sp|Q9HU65|GLNA_PSEAE Glutamine synthetase OS=Pseudomonas aeruginosa (strain ATCC 15692 / PAO1 / 1C / PRS 101 / LMG 12228) GN=glnA PE=1 SV=1	1	6	6	6	23.2	23.2	23.2	51.944	469	469	0	52.918	72767000	25				61	75;145;258;541;562;742	True;True;True;True;True;True	76;146;261;544;566;748	135;136;246;450;451;452;966;967;1000;1342;1343	305;306;527;528;529;928;929;930;931;932;933;934;935;936;937;938;939;940;1902;1903;1904;1905;1906;1982;2599;2600	306;528;934;1903;1982;2600
sp|Q9HUC0|UBIE_PSEAE	sp|Q9HUC0|UBIE_PSEAE	2	2	2	>sp|Q9HUC0|UBIE_PSEAE Ubiquinone/menaquinone biosynthesis C-methyltransferase UbiE OS=Pseudomonas aeruginosa (strain ATCC 15692 / PAO1 / 1C / PRS 101 / LMG 12228) GN=ubiE PE=3 SV=1	1	2	2	2	11.3	11.3	11.3	28.254	256	256	0	10.883	2282300	1				62	537;542	True;True	540;545	958;968	1888;1907	1888;1907
sp|Q9HUC8|SYR_PSEAE	sp|Q9HUC8|SYR_PSEAE	1	1	1	>sp|Q9HUC8|SYR_PSEAE Arginine--tRNA ligase OS=Pseudomonas aeruginosa (strain ATCC 15692 / PAO1 / 1C / PRS 101 / LMG 12228) GN=argS PE=3 SV=1	1	1	1	1	2	2	2	65.199	587	587	0	8.6608	4988500	2				63	753	TRUE	759	1360	2622;2623	2622
sp|Q9HUD0|RL31_PSEAE	sp|Q9HUD0|RL31_PSEAE	1	1	1	>sp|Q9HUD0|RL31_PSEAE 50S ribosomal protein L31 OS=Pseudomonas aeruginosa (strain ATCC 15692 / PAO1 / 1C / PRS 101 / LMG 12228) GN=rpmE PE=1 SV=1	1	1	1	1	11.3	11.3	11.3	7.9201	71	71	0.0095694	5.5466	4007300	1				64	245	TRUE	248	431	904	904
sp|Q9HUM6|PURA_PSEAE	sp|Q9HUM6|PURA_PSEAE	2	2	2	>sp|Q9HUM6|PURA_PSEAE Adenylosuccinate synthetase OS=Pseudomonas aeruginosa (strain ATCC 15692 / PAO1 / 1C / PRS 101 / LMG 12228) GN=purA PE=3 SV=1	1	2	2	2	7	7	7	46.814	430	430	0	23.751	11350000	7				65	752;818	True;True	758;824	1359;1477;1478	2621;2814;2815;2816;2817;2818;2819	2621;2814
sp|Q9HUM9|RS6_PSEAE	sp|Q9HUM9|RS6_PSEAE	1	1	1	>sp|Q9HUM9|RS6_PSEAE 30S ribosomal protein S6 OS=Pseudomonas aeruginosa (strain ATCC 15692 / PAO1 / 1C / PRS 101 / LMG 12228) GN=rpsF PE=3 SV=1	1	1	1	1	12.2	12.2	12.2	16.164	139	139	0.0049505	5.7203	3329800	1				66	65	TRUE	66	120	278	278
sp|Q9HV43|DNAK_PSEAE	sp|Q9HV43|DNAK_PSEAE	6	6	6	>sp|Q9HV43|DNAK_PSEAE Chaperone protein DnaK OS=Pseudomonas aeruginosa (strain ATCC 15692 / PAO1 / 1C / PRS 101 / LMG 12228) GN=dnaK PE=3 SV=1	1	6	6	6	16	16	16	68.402	637	637	0	47.077	60895000	17				67	0;110;378;556;596;776	True;True;True;True;True;True	0;111;381;560;601;782	0;189;190;659;660;990;1074;1396;1397	0;399;400;401;1283;1284;1285;1286;1287;1959;2105;2106;2689;2690;2691;2692;2693	0;399;1286;1959;2105;2691
sp|Q9HV50|GLMM_PSEAE	sp|Q9HV50|GLMM_PSEAE	2	2	2	>sp|Q9HV50|GLMM_PSEAE Phosphoglucosamine mutase OS=Pseudomonas aeruginosa (strain ATCC 15692 / PAO1 / 1C / PRS 101 / LMG 12228) GN=glmM PE=3 SV=1	1	2	2	2	9.2	9.2	9.2	47.796	445	445	0	14.238	7911200	5				68	519;807	True;True	522;813	930;1459	1821;1822;1823;1824;2789	1821;2789
sp|Q9HV55|IF2_PSEAE	sp|Q9HV55|IF2_PSEAE	2	2	2	>sp|Q9HV55|IF2_PSEAE Translation initiation factor IF-2 OS=Pseudomonas aeruginosa (strain ATCC 15692 / PAO1 / 1C / PRS 101 / LMG 12228) GN=infB PE=3 SV=1	1	2	2	2	4	4	4	90.911	840	840	0	14.086	4170500	4				69	200;482	True;True	202;485	357;358;868	765;766;1708;1709	765;1709
sp|Q9HV59|PNP_PSEAE	sp|Q9HV59|PNP_PSEAE	7	7	7	>sp|Q9HV59|PNP_PSEAE Polyribonucleotide nucleotidyltransferase OS=Pseudomonas aeruginosa (strain ATCC 15692 / PAO1 / 1C / PRS 101 / LMG 12228) GN=pnp PE=3 SV=1	1	7	7	7	14	14	14	75.452	701	701	0	52.87	43575000	13				70	24;97;135;235;280;362;514	True;True;True;True;True;True;True	24;98;136;238;283;365;517	35;173;225;226;417;488;638;921;922;923	54;371;465;466;467;468;881;1004;1005;1255;1810;1811;1812;1813	54;371;465;881;1005;1255;1813
sp|Q9HVA2|ILVC_PSEAE	sp|Q9HVA2|ILVC_PSEAE	3	3	3	>sp|Q9HVA2|ILVC_PSEAE Ketol-acid reductoisomerase OS=Pseudomonas aeruginosa (strain ATCC 15692 / PAO1 / 1C / PRS 101 / LMG 12228) GN=ilvC PE=1 SV=1	1	3	3	3	12.4	12.4	12.4	36.424	338	338	0	24.008	31753000	6				71	289;563;675	True;True;True	292;567;680	502;503;1001;1002;1003;1213	1026;1027;1028;1029;1983;1984;1985;2333	1029;1984;2333
sp|Q9HVC4|RL25_PSEAE	sp|Q9HVC4|RL25_PSEAE	4	4	4	>sp|Q9HVC4|RL25_PSEAE 50S ribosomal protein L25 OS=Pseudomonas aeruginosa (strain ATCC 15692 / PAO1 / 1C / PRS 101 / LMG 12228) GN=rplY PE=3 SV=1	1	4	4	4	37.3	37.3	37.3	21.962	204	204	0	27.699	21446000	6				72	328;496;600;795	True;True;True;True	331;499;605;801	571;892;1079;1080;1439;1440	1135;1760;1761;2111;2112;2756;2757	1135;1760;2111;2756
sp|Q9HVC5|KPRS_PSEAE	sp|Q9HVC5|KPRS_PSEAE	3	3	3	>sp|Q9HVC5|KPRS_PSEAE Ribose-phosphate pyrophosphokinase OS=Pseudomonas aeruginosa (strain ATCC 15692 / PAO1 / 1C / PRS 101 / LMG 12228) GN=prs PE=3 SV=1	1	3	3	3	12.1	12.1	12.1	34.04	313	313	0	22.998	13982000	7				73	410;414;580	True;True;True	413;417;584	732;733;741;1034	1434;1435;1436;1452;1453;2036;2037	1436;1452;2036
sp|Q9HVF1|MQO2_PSEAE	sp|Q9HVF1|MQO2_PSEAE	3	3	3	>sp|Q9HVF1|MQO2_PSEAE Probable malate:quinone oxidoreductase 2 OS=Pseudomonas aeruginosa (strain ATCC 15692 / PAO1 / 1C / PRS 101 / LMG 12228) GN=mqo2 PE=3 SV=1	1	3	3	3	10.8	10.8	10.8	55.498	507	507	0	24.468	15887000	4				74	739;798;904	True;True;True	745;804;910	1335;1446;1613	2566;2764;3020;3021	2566;2764;3021
sp|Q9HVI7|GLYA3_PSEAE;sp|Q9I138|GLYA2_PSEAE	sp|Q9HVI7|GLYA3_PSEAE	3;1	3;1	3;1	>sp|Q9HVI7|GLYA3_PSEAE Serine hydroxymethyltransferase 3 OS=Pseudomonas aeruginosa (strain ATCC 15692 / PAO1 / 1C / PRS 101 / LMG 12228) GN=glyA2 PE=3 SV=1	2	3	3	3	7.2	7.2	7.2	45.157	417	417;418	0	18.288	7920700	3				75	372;603;708	True;True;True	375;608;713	653;1095;1268	1276;2128;2424	1276;2128;2424
sp|Q9HVM4|SYI_PSEAE	sp|Q9HVM4|SYI_PSEAE	1	1	1	>sp|Q9HVM4|SYI_PSEAE Isoleucine--tRNA ligase OS=Pseudomonas aeruginosa (strain ATCC 15692 / PAO1 / 1C / PRS 101 / LMG 12228) GN=ileS PE=3 SV=1	1	1	1	1	2.2	2.2	2.2	105.46	943	943	0	9.3943	8805700	3				76	696	TRUE	701	1245;1246	2389;2390;2391	2389
sp|Q9HVN5|CLPB_PSEAE	sp|Q9HVN5|CLPB_PSEAE	6	5	5	>sp|Q9HVN5|CLPB_PSEAE Chaperone protein ClpB OS=Pseudomonas aeruginosa (strain ATCC 15692 / PAO1 / 1C / PRS 101 / LMG 12228) GN=clpB PE=3 SV=1	1	6	5	5	9.4	8.2	8.2	95.004	854	854	0	40.701	9953500	6				77	29;287;406;494;731;881	True;True;True;True;False;True	29;290;409;497;737;887	41;500;728;889;1316;1317;1574;1575	68;69;1024;1430;1754;2518;2519;2953;2954	68;1024;1430;1754;2518;2954
sp|Q9HVT8|GATA_PSEAE	sp|Q9HVT8|GATA_PSEAE	2	2	2	>sp|Q9HVT8|GATA_PSEAE Glutamyl-tRNA(Gln) amidotransferase subunit A OS=Pseudomonas aeruginosa (strain ATCC 15692 / PAO1 / 1C / PRS 101 / LMG 12228) GN=gatA PE=1 SV=1	1	2	2	2	7.4	7.4	7.4	51.862	484	484	0	12.755	2230000	2				78	348;849	True;True	351;855	614;1529	1203;2893	1203;2893
sp|Q9HW02|MURC_PSEAE	sp|Q9HW02|MURC_PSEAE	1	1	1	>sp|Q9HW02|MURC_PSEAE UDP-N-acetylmuramate--L-alanine ligase OS=Pseudomonas aeruginosa (strain ATCC 15692 / PAO1 / 1C / PRS 101 / LMG 12228) GN=murC PE=3 SV=1	1	1	1	1	2.9	2.9	2.9	51.981	480	480	0	10.11	585260	1				79	509	TRUE	512	914	1802	1802
sp|Q9HWC5|RL11_PSEAE	sp|Q9HWC5|RL11_PSEAE	1	1	1	>sp|Q9HWC5|RL11_PSEAE 50S ribosomal protein L11 OS=Pseudomonas aeruginosa (strain ATCC 15692 / PAO1 / 1C / PRS 101 / LMG 12228) GN=rplK PE=3 SV=1	1	1	1	1	14	14	14	14.907	143	143	0	11.757	1707500	1				80	765	TRUE	771	1378	2659	2659
sp|Q9HWC9|RPOC_PSEAE	sp|Q9HWC9|RPOC_PSEAE	24	24	24	>sp|Q9HWC9|RPOC_PSEAE DNA-directed RNA polymerase subunit beta OS=Pseudomonas aeruginosa (strain ATCC 15692 / PAO1 / 1C / PRS 101 / LMG 12228) GN=rpoC PE=3 SV=1	1	24	24	24	23.1	23.1	23.1	154.38	1399	1399	0	190.13	262900000	69				81	13;73;179;189;208;233;234;281;311;370;377;399;436;479;484;490;495;540;554;566;575;724;789;901	True;True;True;True;True;True;True;True;True;True;True;True;True;True;True;True;True;True;True;True;True;True;True;True	13;74;181;191;210;236;237;284;314;373;380;402;439;482;487;493;498;543;558;570;579;730;795;907	19;132;133;315;334;335;336;337;370;371;415;416;489;490;545;546;651;658;700;789;864;870;871;884;890;891;964;965;988;1008;1009;1025;1026;1303;1420;1421;1608;1609	25;298;299;300;301;302;303;690;729;730;731;732;733;787;788;789;790;791;879;880;1006;1007;1096;1097;1098;1272;1273;1281;1282;1360;1534;1535;1696;1697;1698;1711;1712;1713;1714;1715;1716;1748;1755;1756;1757;1758;1759;1898;1899;1900;1901;1955;1956;1957;1994;1995;1996;1997;1998;2021;2022;2023;2480;2481;2726;2727;3014;3015;3016	25;300;690;733;790;879;880;1007;1096;1273;1282;1360;1534;1697;1714;1748;1756;1901;1957;1996;2023;2481;2726;3014
sp|Q9HWD0|RS12_PSEAE	sp|Q9HWD0|RS12_PSEAE	1	1	1	>sp|Q9HWD0|RS12_PSEAE 30S ribosomal protein S12 OS=Pseudomonas aeruginosa (strain ATCC 15692 / PAO1 / 1C / PRS 101 / LMG 12228) GN=rpsL PE=3 SV=1	1	1	1	1	6.5	6.5	6.5	13.799	123	123	0	7.1085	0	1				82	115	TRUE	116	195	410	410
sp|Q9HWD2|EFG1_PSEAE;sp|Q9I244|EFG2_PSEAE	sp|Q9HWD2|EFG1_PSEAE	21;6	21;6	21;6	>sp|Q9HWD2|EFG1_PSEAE Elongation factor G 1 OS=Pseudomonas aeruginosa (strain ATCC 15692 / PAO1 / 1C / PRS 101 / LMG 12228) GN=fusA PE=1 SV=1	2	21	21	21	43.2	43.2	43.2	77.784	706	706;702	0	192.49	374820000	79				83	28;35;111;120;185;304;309;310;315;332;334;340;350;452;478;559;617;800;832;876;888	True;True;True;True;True;True;True;True;True;True;True;True;True;True;True;True;True;True;True;True;True	28;35;112;121;187;307;312;313;318;335;337;343;353;455;481;563;622;806;838;882;894	39;40;53;54;191;203;327;535;542;543;544;551;575;576;578;579;600;601;616;617;814;862;863;994;995;1113;1114;1448;1449;1502;1563;1564;1565;1566;1567;1586;1587	61;62;63;64;65;66;67;86;87;88;89;402;421;714;1081;1082;1083;1093;1094;1095;1104;1141;1142;1143;1144;1145;1146;1147;1148;1149;1151;1152;1182;1183;1184;1205;1206;1207;1208;1209;1210;1211;1581;1692;1693;1694;1695;1964;1965;1966;1967;1968;1969;1970;1971;1972;1973;1974;1975;2157;2158;2159;2160;2161;2766;2767;2768;2769;2857;2939;2940;2941;2942;2943;2944;2945;2946;2971;2972;2973;2974	64;89;402;421;714;1081;1094;1095;1104;1146;1151;1183;1206;1581;1694;1973;2158;2767;2857;2944;2973
sp|Q9HWD5|RL3_PSEAE	sp|Q9HWD5|RL3_PSEAE	3	3	3	>sp|Q9HWD5|RL3_PSEAE 50S ribosomal protein L3 OS=Pseudomonas aeruginosa (strain ATCC 15692 / PAO1 / 1C / PRS 101 / LMG 12228) GN=rplC PE=3 SV=1	1	3	3	3	25.1	25.1	25.1	22.591	211	211	0	18.717	35761000	6				84	276;365;864	True;True;True	279;368;870	483;642;643;1549	997;1260;1261;1262;1263;2920	997;1261;2920
sp|Q9HWD8|RL2_PSEAE	sp|Q9HWD8|RL2_PSEAE	5	5	5	>sp|Q9HWD8|RL2_PSEAE 50S ribosomal protein L2 OS=Pseudomonas aeruginosa (strain ATCC 15692 / PAO1 / 1C / PRS 101 / LMG 12228) GN=rplB PE=3 SV=1	1	5	5	5	24.5	24.5	24.5	29.579	273	273	0	42.687	32067000	11				85	116;324;325;327;670	True;True;True;True;True	117;327;328;330;675	196;197;565;566;567;568;570;1203	411;412;1125;1126;1127;1128;1129;1130;1131;1132;1134;2314	411;1127;1131;1134;2314
sp|Q9HWE0|RL22_PSEAE	sp|Q9HWE0|RL22_PSEAE	1	1	1	>sp|Q9HWE0|RL22_PSEAE 50S ribosomal protein L22 OS=Pseudomonas aeruginosa (strain ATCC 15692 / PAO1 / 1C / PRS 101 / LMG 12228) GN=rplV PE=3 SV=1	1	1	1	1	11.8	11.8	11.8	11.911	110	110	0	8.0115	6470300	1				86	806	TRUE	812	1458	2788	2788
sp|Q9HWE1|RS3_PSEAE	sp|Q9HWE1|RS3_PSEAE	2	2	2	>sp|Q9HWE1|RS3_PSEAE 30S ribosomal protein S3 OS=Pseudomonas aeruginosa (strain ATCC 15692 / PAO1 / 1C / PRS 101 / LMG 12228) GN=rpsC PE=3 SV=1	1	2	2	2	13.2	13.2	13.2	25.838	228	228	0	12.515	4639800	3				87	352;438	True;True	355;441	619;791	1214;1538;1539	1214;1539
sp|Q9HWE5|RL14_PSEAE	sp|Q9HWE5|RL14_PSEAE	2	2	2	>sp|Q9HWE5|RL14_PSEAE 50S ribosomal protein L14 OS=Pseudomonas aeruginosa (strain ATCC 15692 / PAO1 / 1C / PRS 101 / LMG 12228) GN=rplN PE=3 SV=1	1	2	2	2	21.3	21.3	21.3	13.412	122	122	0	15.902	5553700	3				88	570;889	True;True	574;895	1015;1588	2006;2007;2975	2007;2975
sp|Q9HWE8|RS14_PSEAE	sp|Q9HWE8|RS14_PSEAE	1	1	1	>sp|Q9HWE8|RS14_PSEAE 30S ribosomal protein S14 OS=Pseudomonas aeruginosa (strain ATCC 15692 / PAO1 / 1C / PRS 101 / LMG 12228) GN=rpsN PE=3 SV=1	1	1	1	1	12.9	12.9	12.9	11.565	101	101	0	5.8747	2316100	1				89	59	TRUE	60	110	259	259
sp|Q9HWE9|RS8_PSEAE	sp|Q9HWE9|RS8_PSEAE	1	1	1	>sp|Q9HWE9|RS8_PSEAE 30S ribosomal protein S8 OS=Pseudomonas aeruginosa (strain ATCC 15692 / PAO1 / 1C / PRS 101 / LMG 12228) GN=rpsH PE=3 SV=1	1	1	1	1	9.2	9.2	9.2	14.17	130	130	0	9.5534	14336000	2				90	704	TRUE	709	1260;1261	2411;2412	2412
sp|Q9HWF2|RS5_PSEAE	sp|Q9HWF2|RS5_PSEAE	4	4	4	>sp|Q9HWF2|RS5_PSEAE 30S ribosomal protein S5 OS=Pseudomonas aeruginosa (strain ATCC 15692 / PAO1 / 1C / PRS 101 / LMG 12228) GN=rpsE PE=3 SV=1	1	4	4	4	36.1	36.1	36.1	17.625	166	166	0	37.204	42902000	10				91	125;363;628;874	True;True;True;True	126;366;633;880	211;212;639;640;1136;1561	433;434;435;1256;1257;1258;2199;2935;2936;2937	435;1258;2199;2935
sp|Q9HWF7|RS13_PSEAE	sp|Q9HWF7|RS13_PSEAE	1	1	1	>sp|Q9HWF7|RS13_PSEAE 30S ribosomal protein S13 OS=Pseudomonas aeruginosa (strain ATCC 15692 / PAO1 / 1C / PRS 101 / LMG 12228) GN=rpsM PE=3 SV=1	1	1	1	1	11	11	11	13.265	118	118	0	6.7008	3153000	1				92	383	TRUE	386	670	1301	1301
sp|Q9HWG0|UVRA_PSEAE	sp|Q9HWG0|UVRA_PSEAE	1	1	1	>sp|Q9HWG0|UVRA_PSEAE UvrABC system protein A OS=Pseudomonas aeruginosa (strain ATCC 15692 / PAO1 / 1C / PRS 101 / LMG 12228) GN=uvrA PE=3 SV=1	1	1	1	1	1.6	1.6	1.6	104.49	945	945	0	8.5208	455690	1				93	481	TRUE	484	867	1707	1707
sp|Q9HXM6|GUAA_PSEAE	sp|Q9HXM6|GUAA_PSEAE	2	2	2	>sp|Q9HXM6|GUAA_PSEAE GMP synthase [glutamine-hydrolyzing] OS=Pseudomonas aeruginosa (strain ATCC 15692 / PAO1 / 1C / PRS 101 / LMG 12228) GN=guaA PE=3 SV=1	1	2	2	2	7.2	7.2	7.2	57.959	525	525	0	14.001	14057000	4				94	250;838	True;True	253;844	438;439;1510	912;913;914;2866	912;2866
sp|Q9HXN2|PUR4_PSEAE	sp|Q9HXN2|PUR4_PSEAE	1	1	1	>sp|Q9HXN2|PUR4_PSEAE Phosphoribosylformylglycinamidine synthase OS=Pseudomonas aeruginosa (strain ATCC 15692 / PAO1 / 1C / PRS 101 / LMG 12228) GN=purL PE=3 SV=1	1	1	1	1	1.1	1.1	1.1	140.65	1298	1298	0	6.5041	625830	1				95	862	TRUE	868	1546	2917	2917
sp|Q9HXZ4|PYRG_PSEAE	sp|Q9HXZ4|PYRG_PSEAE	4	4	4	>sp|Q9HXZ4|PYRG_PSEAE CTP synthase OS=Pseudomonas aeruginosa (strain ATCC 15692 / PAO1 / 1C / PRS 101 / LMG 12228) GN=pyrG PE=3 SV=1	1	4	4	4	13.7	13.7	13.7	59.617	542	542	0	31.221	16484000	5				96	293;775;895;899	True;True;True;True	296;781;901;905	511;1395;1599;1604	1042;2687;2688;3000;3008;3009	1042;2687;3000;3008
sp|Q9HXZ5|ENO_PSEAE	sp|Q9HXZ5|ENO_PSEAE	2	2	2	>sp|Q9HXZ5|ENO_PSEAE Enolase OS=Pseudomonas aeruginosa (strain ATCC 15692 / PAO1 / 1C / PRS 101 / LMG 12228) GN=eno PE=3 SV=1	1	2	2	2	7.5	7.5	7.5	45.195	429	429	0	25.919	7885100	4				97	256;856	True;True	259;862	448;1538;1539	925;926;2905;2906	926;2905
sp|Q9HY84|ASSY_PSEAE	sp|Q9HY84|ASSY_PSEAE	2	2	2	>sp|Q9HY84|ASSY_PSEAE Argininosuccinate synthase OS=Pseudomonas aeruginosa (strain ATCC 15692 / PAO1 / 1C / PRS 101 / LMG 12228) GN=argG PE=3 SV=1	1	2	2	2	8.6	8.6	8.6	45.297	405	405	0	13.843	12627000	3				98	95;237	True;True	96;240	171;419;420	369;884;885	369;885
sp|Q9HYR2|FABH_PSEAE	sp|Q9HYR2|FABH_PSEAE	1	1	1	>sp|Q9HYR2|FABH_PSEAE 3-oxoacyl-[acyl-carrier-protein] synthase 3 OS=Pseudomonas aeruginosa (strain ATCC 15692 / PAO1 / 1C / PRS 101 / LMG 12228) GN=fabH PE=1 SV=1	1	1	1	1	4.5	4.5	4.5	34.003	330	330	0	6.0513	2034700	1				99	386	TRUE	389	677	1315	1315
sp|Q9HZ71|RS1_PSEAE	sp|Q9HZ71|RS1_PSEAE	12	12	12	>sp|Q9HZ71|RS1_PSEAE 30S ribosomal protein S1 OS=Pseudomonas aeruginosa (strain ATCC 15692 / PAO1 / 1C / PRS 101 / LMG 12228) GN=rpsA PE=3 SV=1	1	12	12	12	30.8	30.8	30.8	61.869	559	559	0	99.223	99871000	35				100	27;33;173;274;275;288;439;623;650;678;712;725	True;True;True;True;True;True;True;True;True;True;True;True	27;33;175;277;278;291;442;628;655;683;718;731	38;50;51;305;306;479;480;481;482;501;792;1124;1125;1126;1127;1174;1175;1218;1219;1281;1304	59;60;83;84;677;678;679;989;990;991;992;993;994;995;996;1025;1540;2176;2177;2178;2179;2180;2181;2182;2183;2184;2185;2261;2262;2263;2341;2342;2343;2440;2482	59;84;678;989;994;1025;1540;2178;2262;2343;2440;2482
sp|Q9HZ76|WBPE_PSEAE	sp|Q9HZ76|WBPE_PSEAE	4	4	4	>sp|Q9HZ76|WBPE_PSEAE UDP-2-acetamido-2-deoxy-3-oxo-D-glucuronate aminotransferase OS=Pseudomonas aeruginosa (strain ATCC 15692 / PAO1 / 1C / PRS 101 / LMG 12228) GN=wbpE PE=1 SV=1	1	4	4	4	15.9	15.9	15.9	38.924	359	359	0	29.595	23192000	9				101	382;456;785;896	True;True;True;True	385;459;791;902	669;819;1412;1413;1600;1601	1300;1590;2715;2716;2717;3001;3002;3003;3004	1300;1590;2716;3001
sp|Q9HZA7|ACCD_PSEAE	sp|Q9HZA7|ACCD_PSEAE	2	2	2	>sp|Q9HZA7|ACCD_PSEAE Acetyl-coenzyme A carboxylase carboxyl transferase subunit beta OS=Pseudomonas aeruginosa (strain ATCC 15692 / PAO1 / 1C / PRS 101 / LMG 12228) GN=accD PE=1 SV=1	1	2	2	2	10.3	10.3	10.3	31.843	290	290	0	16.751	10360000	4				102	451;586	True;True	454;590	812;813;1045	1578;1579;1580;2056	1578;2056
sp|Q9HZE0|DHE2_PSEAE	sp|Q9HZE0|DHE2_PSEAE	28	28	28	>sp|Q9HZE0|DHE2_PSEAE NAD-specific glutamate dehydrogenase OS=Pseudomonas aeruginosa (strain ATCC 15692 / PAO1 / 1C / PRS 101 / LMG 12228) GN=gdhB PE=1 SV=1	1	28	28	28	26	26	26	182.64	1620	1620	0	225.13	225070000	84				103	6;12;60;67;77;99;137;159;187;198;199;322;460;475;491;512;547;589;591;686;702;760;813;819;867;875;894;909	True;True;True;True;True;True;True;True;True;True;True;True;True;True;True;True;True;True;True;True;True;True;True;True;True;True;True;True	6;12;61;68;78;100;138;161;189;200;201;325;463;478;494;515;550;593;595;691;707;766;819;825;873;881;900;915	6;18;111;112;123;124;138;139;175;176;228;229;230;231;280;330;352;353;354;355;356;562;563;823;852;853;885;918;975;976;1049;1050;1051;1053;1054;1230;1231;1258;1371;1467;1468;1479;1554;1562;1597;1598;1621;1622	6;7;23;24;260;261;283;284;285;310;311;312;313;373;374;375;472;473;474;475;476;477;478;479;480;481;482;483;484;485;486;487;488;489;490;632;718;758;759;760;761;762;763;764;1120;1121;1595;1596;1666;1667;1668;1669;1670;1749;1806;1917;1918;1919;1920;1921;2060;2061;2062;2063;2065;2066;2067;2365;2366;2407;2643;2798;2799;2800;2820;2926;2938;2997;2998;2999;3040;3041;3042;3043	7;24;261;283;311;373;473;632;718;758;762;1121;1596;1670;1749;1806;1918;2063;2067;2365;2407;2643;2798;2820;2926;2938;2997;3042
sp|Q9HZJ2|FADB_PSEAE	sp|Q9HZJ2|FADB_PSEAE	2	2	2	>sp|Q9HZJ2|FADB_PSEAE Fatty acid oxidation complex subunit alpha OS=Pseudomonas aeruginosa (strain ATCC 15692 / PAO1 / 1C / PRS 101 / LMG 12228) GN=fadB PE=3 SV=1	1	2	2	2	5.2	5.2	5.2	76.953	715	715	0	19.153	5721100	4				104	286;771	True;True	289;777	499;1385;1386	1022;1023;2672;2673	1023;2672
sp|Q9HZJ3|FADA_PSEAE	sp|Q9HZJ3|FADA_PSEAE	2	2	2	>sp|Q9HZJ3|FADA_PSEAE 3-ketoacyl-CoA thiolase OS=Pseudomonas aeruginosa (strain ATCC 15692 / PAO1 / 1C / PRS 101 / LMG 12228) GN=fadA PE=3 SV=1	1	2	2	2	10.7	10.7	10.7	41.643	391	391	0	12.471	10160000	4				105	43;101	True;True	43;102	70;71;178	127;128;129;130;377	128;377
sp|Q9HZP6|ETFB_PSEAE	sp|Q9HZP6|ETFB_PSEAE	3	3	3	>sp|Q9HZP6|ETFB_PSEAE Electron transfer flavoprotein subunit beta OS=Pseudomonas aeruginosa (strain ATCC 15692 / PAO1 / 1C / PRS 101 / LMG 12228) GN=etfB PE=3 SV=1	1	3	3	3	22.5	22.5	22.5	26.376	249	249	0	22.113	19511000	8				106	61;194;799	True;True;True	62;196;805	113;114;345;346;1447	262;263;264;265;745;746;747;2765	262;746;2765
sp|Q9HZZ2|EFP_PSEAE	sp|Q9HZZ2|EFP_PSEAE	1	1	1	>sp|Q9HZZ2|EFP_PSEAE Elongation factor P OS=Pseudomonas aeruginosa (strain ATCC 15692 / PAO1 / 1C / PRS 101 / LMG 12228) GN=efp PE=1 SV=1	1	1	1	1	8.5	8.5	8.5	20.985	188	188	0	16.338	9396800	3				107	45	TRUE	45	73;74	132;133;134	134
sp|Q9I0J6|NUOG_PSEAE	sp|Q9I0J6|NUOG_PSEAE	9	9	9	>sp|Q9I0J6|NUOG_PSEAE NADH-quinone oxidoreductase subunit G OS=Pseudomonas aeruginosa (strain ATCC 15692 / PAO1 / 1C / PRS 101 / LMG 12228) GN=nuoG PE=3 SV=1	1	9	9	9	18.1	18.1	18.1	98.999	905	905	0	82.087	66176000	24				108	52;108;239;278;474;489;526;668;868	True;True;True;True;True;True;True;True;True	52;109;242;281;477;492;529;673;874	88;187;422;423;485;486;850;851;882;883;939;1201;1555	174;175;396;397;887;888;889;890;891;999;1000;1001;1002;1662;1663;1664;1665;1746;1747;1834;1835;2311;2312;2927	175;397;891;1002;1663;1747;1835;2312;2927
sp|Q9I0J7|NUOF_PSEAE	sp|Q9I0J7|NUOF_PSEAE	1	1	1	>sp|Q9I0J7|NUOF_PSEAE NADH-quinone oxidoreductase subunit F OS=Pseudomonas aeruginosa (strain ATCC 15692 / PAO1 / 1C / PRS 101 / LMG 12228) GN=nuoF PE=3 SV=1	1	1	1	1	4.5	4.5	4.5	48.678	448	448	0	10.678	4990500	3				109	569	TRUE	573	1013;1014	2003;2004;2005	2004
sp|Q9I0J9|NUOCD_PSEAE	sp|Q9I0J9|NUOCD_PSEAE	4	4	4	>sp|Q9I0J9|NUOCD_PSEAE NADH-quinone oxidoreductase subunit C/D OS=Pseudomonas aeruginosa (strain ATCC 15692 / PAO1 / 1C / PRS 101 / LMG 12228) GN=nuoC PE=3 SV=1	1	4	4	4	7.9	7.9	7.9	68.322	593	593	0	28.778	18817000	3				110	240;487;663;745	True;True;True;True	243;490;668;751	424;880;1194;1347	892;1744;2302;2606	892;1744;2302;2606
sp|Q9I0K4|ACEA_PSEAE	sp|Q9I0K4|ACEA_PSEAE	10	10	10	>sp|Q9I0K4|ACEA_PSEAE Isocitrate lyase OS=Pseudomonas aeruginosa (strain ATCC 15692 / PAO1 / 1C / PRS 101 / LMG 12228) GN=PA2634 PE=1 SV=1	1	10	10	10	28.8	28.8	28.8	58.886	531	531	0	109.18	122680000	51				111	172;201;225;336;508;543;614;662;734;863	True;True;True;True;True;True;True;True;True;True	174;203;227;339;511;546;619;667;740;869	302;303;304;359;360;397;582;583;913;969;970;1110;1192;1193;1322;1323;1324;1547;1548	664;665;666;667;668;669;670;671;672;673;674;675;676;767;768;769;770;771;830;1157;1158;1801;1908;1909;1910;1911;2153;2154;2299;2300;2301;2530;2531;2532;2533;2534;2535;2536;2537;2538;2539;2540;2541;2542;2543;2544;2545;2546;2547;2918;2919	675;768;830;1158;1801;1911;2153;2301;2531;2918
sp|Q9I1S2|HCNB_PSEAE	sp|Q9I1S2|HCNB_PSEAE	3	3	3	>sp|Q9I1S2|HCNB_PSEAE Hydrogen cyanide synthase subunit HcnB OS=Pseudomonas aeruginosa (strain ATCC 15692 / PAO1 / 1C / PRS 101 / LMG 12228) GN=hcnB PE=1 SV=1	1	3	3	3	9.9	9.9	9.9	50.388	464	464	0	22.314	11127000	7				112	68;220;347	True;True;True	69;222;350	125;390;391;612;613	286;821;822;823;824;1201;1202	286;823;1202
sp|Q9I291|GALU_PSEAE	sp|Q9I291|GALU_PSEAE	1	1	1	>sp|Q9I291|GALU_PSEAE UTP--glucose-1-phosphate uridylyltransferase OS=Pseudomonas aeruginosa (strain ATCC 15692 / PAO1 / 1C / PRS 101 / LMG 12228) GN=galU PE=3 SV=1	1	1	1	1	11.5	11.5	11.5	31.236	279	279	0	7.2449	2826800	3				113	213	TRUE	215	378	806;807;808	807
sp|Q9I2A8|ATOB_PSEAE	sp|Q9I2A8|ATOB_PSEAE	2	2	2	>sp|Q9I2A8|ATOB_PSEAE Acetyl-CoA acetyltransferase OS=Pseudomonas aeruginosa (strain ATCC 15692 / PAO1 / 1C / PRS 101 / LMG 12228) GN=atoB PE=3 SV=1	1	2	2	2	9.4	9.4	9.4	40.405	393	393	0	11.28	3664000	1				114	183;349	True;True	185;352	325;615	712;1204	712;1204
sp|Q9I2V5|ACNB_PSEAE	sp|Q9I2V5|ACNB_PSEAE	13	13	13	>sp|Q9I2V5|ACNB_PSEAE Aconitate hydratase B OS=Pseudomonas aeruginosa (strain ATCC 15692 / PAO1 / 1C / PRS 101 / LMG 12228) GN=acnB PE=3 SV=1	1	13	13	13	20.4	20.4	20.4	93.627	869	869	0	104.9	116880000	37				115	23;144;156;157;285;291;518;544;557;590;726;858;883	True;True;True;True;True;True;True;True;True;True;True;True;True	23;145;158;159;288;294;521;547;561;594;732;864;889	33;34;245;274;275;276;277;497;498;507;508;928;929;971;991;992;1052;1305;1306;1542;1578;1579	51;52;53;523;524;525;526;621;622;623;624;625;626;1019;1020;1021;1034;1035;1036;1037;1818;1819;1820;1912;1960;1961;2064;2483;2484;2485;2486;2487;2488;2911;2912;2959;2960	52;524;625;626;1020;1036;1818;1912;1961;2064;2488;2911;2959	6	423
sp|Q9I3D1|DLDH2_PSEAE	sp|Q9I3D1|DLDH2_PSEAE	13	13	13	>sp|Q9I3D1|DLDH2_PSEAE Dihydrolipoyl dehydrogenase OS=Pseudomonas aeruginosa (strain ATCC 15692 / PAO1 / 1C / PRS 101 / LMG 12228) GN=lpdG PE=3 SV=1	1	13	13	13	39.5	39.5	39.5	50.164	478	478	0	124.05	198810000	45				116	20;83;93;103;106;221;335;467;468;624;666;711;773	True;True;True;True;True;True;True;True;True;True;True;True;True	20;84;94;104;107;223;338;470;471;629;671;717;779	29;30;151;152;169;181;184;392;580;581;833;834;835;1128;1129;1197;1198;1199;1277;1278;1279;1280;1389;1390	43;44;45;46;47;330;331;366;384;385;386;387;388;391;825;1153;1154;1155;1156;1614;1615;1616;1617;1618;1619;1620;1621;1622;1623;2186;2187;2188;2189;2190;2306;2307;2308;2309;2435;2436;2437;2438;2439;2680;2681;2682	45;330;366;385;391;825;1156;1614;1621;2189;2308;2439;2682
sp|Q9I3D2|ODO2_PSEAE	sp|Q9I3D2|ODO2_PSEAE	3	3	3	>sp|Q9I3D2|ODO2_PSEAE Dihydrolipoyllysine-residue succinyltransferase component of 2-oxoglutarate dehydrogenase complex OS=Pseudomonas aeruginosa (strain ATCC 15692 / PAO1 / 1C / PRS 101 / LMG 12228) GN=sucB PE=3 SV=1	1	3	3	3	13.4	13.4	13.4	42.887	409	409	0	23.979	27465000	9				117	476;534;598	True;True;True	479;537;603	854;855;951;952;1077	1671;1672;1673;1855;1856;1857;1858;1859;2109	1671;1856;2109
sp|Q9I3F5|ACNA_PSEAE	sp|Q9I3F5|ACNA_PSEAE	14	14	14	>sp|Q9I3F5|ACNA_PSEAE Aconitate hydratase A OS=Pseudomonas aeruginosa (strain ATCC 15692 / PAO1 / 1C / PRS 101 / LMG 12228) GN=acnA PE=3 SV=1	1	14	14	14	21.9	21.9	21.9	99.147	910	910	0	127.76	126820000	48				118	39;62;63;188;264;354;450;754;761;784;791;837;840;908	True;True;True;True;True;True;True;True;True;True;True;True;True;True	39;63;64;190;267;357;453;760;767;790;797;843;846;914	64;115;116;117;331;332;333;462;463;621;811;1361;1362;1372;1373;1411;1423;1424;1508;1509;1513;1514;1620	114;266;267;268;269;270;719;720;721;722;723;724;725;726;727;728;958;959;960;961;962;1216;1577;2624;2625;2644;2645;2646;2647;2648;2649;2650;2714;2729;2730;2731;2732;2733;2734;2735;2736;2864;2865;2869;2870;2871;2872;3039	114;267;270;720;961;1216;1577;2624;2644;2714;2730;2864;2871;3039
sp|Q9I4Z4|PAL_PSEAE	sp|Q9I4Z4|PAL_PSEAE	2	2	2	>sp|Q9I4Z4|PAL_PSEAE Peptidoglycan-associated lipoprotein OS=Pseudomonas aeruginosa (strain ATCC 15692 / PAO1 / 1C / PRS 101 / LMG 12228) GN=pal PE=3 SV=1	1	2	2	2	22	22	22	17.925	168	168	0	18.962	56652000	11				119	219;906	True;True	221;912	389;1617;1618	820;3028;3029;3030;3031;3032;3033;3034;3035;3036;3037	820;3034
sp|Q9I558|ACSA1_PSEAE	sp|Q9I558|ACSA1_PSEAE	1	1	1	>sp|Q9I558|ACSA1_PSEAE Acetyl-coenzyme A synthetase 1 OS=Pseudomonas aeruginosa (strain ATCC 15692 / PAO1 / 1C / PRS 101 / LMG 12228) GN=acsA1 PE=3 SV=1	1	1	1	1	2.9	2.9	2.9	71.762	651	651	0	8.3125	3297500	1				120	196	TRUE	198	348	749	749
sp|Q9I576|HPPD_PSEAE	sp|Q9I576|HPPD_PSEAE	1	1	1	>sp|Q9I576|HPPD_PSEAE 4-hydroxyphenylpyruvate dioxygenase OS=Pseudomonas aeruginosa (strain ATCC 15692 / PAO1 / 1C / PRS 101 / LMG 12228) GN=hpd PE=3 SV=1	1	1	1	1	4.2	4.2	4.2	39.912	357	357	0	13.131	0	1				121	604	TRUE	609	1096	2129	2129
sp|Q9I5A5|PTA_PSEAE	sp|Q9I5A5|PTA_PSEAE	1	1	1	>sp|Q9I5A5|PTA_PSEAE Phosphate acetyltransferase OS=Pseudomonas aeruginosa (strain ATCC 15692 / PAO1 / 1C / PRS 101 / LMG 12228) GN=pta PE=1 SV=1	1	1	1	1	1.4	1.4	1.4	75.696	704	704	0	6.3063	0	1				122	822	TRUE	828	1483	2824	2824
sp|Q9I5Y4|PGK_PSEAE	sp|Q9I5Y4|PGK_PSEAE	1	1	1	>sp|Q9I5Y4|PGK_PSEAE Phosphoglycerate kinase OS=Pseudomonas aeruginosa (strain ATCC 15692 / PAO1 / 1C / PRS 101 / LMG 12228) GN=pgk PE=3 SV=1	1	1	1	1	4.4	4.4	4.4	40.404	387	387	0	8.1561	7592700	3				123	786	TRUE	792	1414;1415	2718;2719;2720	2720
sp|Q9I5Z0|METK_PSEAE	sp|Q9I5Z0|METK_PSEAE	3	3	3	>sp|Q9I5Z0|METK_PSEAE S-adenosylmethionine synthase OS=Pseudomonas aeruginosa (strain ATCC 15692 / PAO1 / 1C / PRS 101 / LMG 12228) GN=metK PE=3 SV=1	1	3	3	3	8.6	8.6	8.6	42.709	396	396	0	16.433	11696000	3				124	191;381;652	True;True;True	193;384;657	340;668;1177	738;1299;2265	738;1299;2265
sp|Q9I636|MASZ_PSEAE	sp|Q9I636|MASZ_PSEAE	2	2	2	>sp|Q9I636|MASZ_PSEAE Malate synthase G OS=Pseudomonas aeruginosa (strain ATCC 15692 / PAO1 / 1C / PRS 101 / LMG 12228) GN=glcB PE=3 SV=1	1	2	2	2	3.4	3.4	3.4	78.659	725	725	0	12.618	14130000	4				125	411;553	True;True	414;557	734;735;986;987	1437;1438;1953;1954	1437;1954
sp|Q9I685|SAHH_PSEAE	sp|Q9I685|SAHH_PSEAE	11	11	11	>sp|Q9I685|SAHH_PSEAE Adenosylhomocysteinase OS=Pseudomonas aeruginosa (strain ATCC 15692 / PAO1 / 1C / PRS 101 / LMG 12228) GN=ahcY PE=3 SV=1	1	11	11	11	35.2	35.2	35.2	51.399	469	469	0	81.505	111040000	31				126	143;203;282;374;397;433;613;615;638;665;887	True;True;True;True;True;True;True;True;True;True;True	144;205;285;377;400;436;618;620;643;670;893	242;243;244;363;364;491;492;655;694;695;696;697;781;1109;1111;1154;1196;1585	520;521;522;776;777;778;779;780;1008;1009;1010;1278;1341;1342;1343;1344;1345;1346;1347;1348;1349;1350;1351;1352;1353;1354;1518;2152;2155;2225;2304;2305;2969;2970	522;780;1008;1278;1353;1518;2152;2155;2225;2305;2970
sp|Q9I6E0|ILVD_PSEAE	sp|Q9I6E0|ILVD_PSEAE	1	1	1	>sp|Q9I6E0|ILVD_PSEAE Dihydroxy-acid dehydratase OS=Pseudomonas aeruginosa (strain ATCC 15692 / PAO1 / 1C / PRS 101 / LMG 12228) GN=ilvD PE=3 SV=1	1	1	1	1	2.1	2.1	2.1	65.159	612	612	0	9.6526	4705100	3				127	38	TRUE	38	62;63	111;112;113	111
sp|Q9I6M4|DAVT_PSEAE	sp|Q9I6M4|DAVT_PSEAE	2	2	2	>sp|Q9I6M4|DAVT_PSEAE 5-aminovalerate aminotransferase DavT OS=Pseudomonas aeruginosa (strain ATCC 15692 / PAO1 / 1C / PRS 101 / LMG 12228) GN=davT PE=1 SV=1	1	2	2	2	8.2	8.2	8.2	45.22	426	426	0	20.412	19053000	5				128	723;747	True;True	729;753	1302;1351;1352	2479;2611;2612;2613;2614	2479;2613
sp|Q9I6M5|DAVD_PSEAE	sp|Q9I6M5|DAVD_PSEAE	2	2	2	>sp|Q9I6M5|DAVD_PSEAE Glutarate-semialdehyde dehydrogenase DavD OS=Pseudomonas aeruginosa (strain ATCC 15692 / PAO1 / 1C / PRS 101 / LMG 12228) GN=davD PE=1 SV=1	1	2	2	2	7	7	7	51.622	483	483	0	19.599	14643000	3				129	513;550	True;True	516;553	919;920;981	1807;1808;1809;1932	1809;1932
sp|Q9I747|HCP1_PSEAE	sp|Q9I747|HCP1_PSEAE	1	1	1	>sp|Q9I747|HCP1_PSEAE Protein hcp1 OS=Pseudomonas aeruginosa (strain ATCC 15692 / PAO1 / 1C / PRS 101 / LMG 12228) GN=hcp1 PE=1 SV=1	1	1	1	1	6.2	6.2	6.2	17.414	162	162	0	6.2283	3943600	1				130	847	TRUE	853	1527	2891	2891
sp|Q9I7C2|GYRB_PSEAE	sp|Q9I7C2|GYRB_PSEAE	1	1	1	>sp|Q9I7C2|GYRB_PSEAE DNA gyrase subunit B OS=Pseudomonas aeruginosa (strain ATCC 15692 / PAO1 / 1C / PRS 101 / LMG 12228) GN=gyrB PE=3 SV=1	1	1	1	1	1.6	1.6	1.6	90.188	806	806	0.0095238	5.5418	6923800	1				131	622	TRUE	627	1123	2175	2175
sp|Q9LCT3|SECA_PSEAE	sp|Q9LCT3|SECA_PSEAE	2	2	2	>sp|Q9LCT3|SECA_PSEAE Protein translocase subunit SecA OS=Pseudomonas aeruginosa (strain ATCC 15692 / PAO1 / 1C / PRS 101 / LMG 12228) GN=secA PE=3 SV=1	1	2	2	2	3.2	3.2	3.2	103.85	916	916	0	11.338	4313300	2				132	70;759	True;True	71;765	127;1370	289;2642	289;2642
sp|Q9S508|PHZB2_PSEAE;sp|O69753|PHZB1_PSEAE	sp|Q9S508|PHZB2_PSEAE;sp|O69753|PHZB1_PSEAE	3;2	3;2	3;2	>sp|Q9S508|PHZB2_PSEAE Phenazine biosynthesis protein PhzB 2 OS=Pseudomonas aeruginosa (strain ATCC 15692 / PAO1 / 1C / PRS 101 / LMG 12228) GN=phzB2 PE=1 SV=1;>sp|O69753|PHZB1_PSEAE Phenazine biosynthesis protein PhzB 1 OS=Pseudomonas aeruginosa (strain A	2	3	3	3	17.9	17.9	17.9	19.027	162	162;162	0	26.783	31763000	8				133	186;573;632	True;True;True	188;577;637	328;329;1021;1022;1144;1145	715;716;717;2014;2015;2213;2214;2215	715;2015;2213
tr|G3XCU6|G3XCU6_PSEAE	tr|G3XCU6|G3XCU6_PSEAE	1	1	1	>tr|G3XCU6|G3XCU6_PSEAE Transcriptional regulator CysB OS=Pseudomonas aeruginosa (strain ATCC 15692 / PAO1 / 1C / PRS 101 / LMG 12228) GN=cysB PE=4 SV=1	1	1	1	1	6.5	6.5	6.5	36.109	324	324	0	7.2458	2809600	1				134	532	TRUE	535	949	1852	1852
tr|G3XCV0|G3XCV0_PSEAE	tr|G3XCV0|G3XCV0_PSEAE	1	1	1	>tr|G3XCV0|G3XCV0_PSEAE Transcriptional regulator FleQ OS=Pseudomonas aeruginosa (strain ATCC 15692 / PAO1 / 1C / PRS 101 / LMG 12228) GN=fleQ PE=1 SV=1	1	1	1	1	2.9	2.9	2.9	55.276	490	490	0	7.3716	1659900	2				135	797	TRUE	803	1444;1445	2762;2763	2762
tr|G3XCZ6|G3XCZ6_PSEAE	tr|G3XCZ6|G3XCZ6_PSEAE	1	1	1	>tr|G3XCZ6|G3XCZ6_PSEAE Malonyl CoA-acyl carrier protein transacylase OS=Pseudomonas aeruginosa (strain ATCC 15692 / PAO1 / 1C / PRS 101 / LMG 12228) GN=fabD PE=3 SV=1	1	1	1	1	6.4	6.4	6.4	32.444	312	312	0	6.7698	10395000	1				136	409	TRUE	412	731	1433	1433
tr|Q9HTD1|Q9HTD1_PSEAE	tr|Q9HTD1|Q9HTD1_PSEAE	7	7	7	>tr|Q9HTD1|Q9HTD1_PSEAE Probable transcarboxylase subunit OS=Pseudomonas aeruginosa (strain ATCC 15692 / PAO1 / 1C / PRS 101 / LMG 12228) GN=PA5435 PE=4 SV=1	1	7	7	7	20.9	20.9	20.9	66.095	607	607	0	44.296	51519000	17				137	15;84;323;364;567;674;902	True;True;True;True;True;True;True	15;85;326;367;571;679;908	21;22;153;154;564;641;1010;1011;1210;1211;1212;1610	27;28;29;332;333;334;1122;1123;1124;1259;1999;2000;2001;2329;2330;2331;2332;3017	29;333;1124;1259;2001;2332;3017
tr|Q9HTD9|Q9HTD9_PSEAE	tr|Q9HTD9|Q9HTD9_PSEAE	9	9	9	>tr|Q9HTD9|Q9HTD9_PSEAE Alcohol dehydrogenase OS=Pseudomonas aeruginosa (strain ATCC 15692 / PAO1 / 1C / PRS 101 / LMG 12228) GN=adhA PE=1 SV=1	1	9	9	9	41.5	41.5	41.5	35.911	342	342	0	82.477	98884000	22				138	9;16;87;114;149;357;637;640;850	True;True;True;True;True;True;True;True;True	9;16;88;115;150;360;642;645;856	9;10;23;24;158;194;253;254;255;628;629;630;1152;1153;1159;1530	12;13;30;31;32;33;340;408;409;541;542;543;544;545;1240;1241;1242;1243;2222;2223;2224;2236;2894	13;30;340;409;544;1242;2223;2236;2894
tr|Q9HTP2|Q9HTP2_PSEAE	tr|Q9HTP2|Q9HTP2_PSEAE	1	1	1	>tr|Q9HTP2|Q9HTP2_PSEAE Probable aldehyde dehydrogenase OS=Pseudomonas aeruginosa (strain ATCC 15692 / PAO1 / 1C / PRS 101 / LMG 12228) GN=PA5312 PE=3 SV=1	1	1	1	1	8	8	8	53.143	497	497	0.0097561	5.6547	7094900	4				139	229	TRUE	231	405;406	846;847;848;849	847
tr|Q9HUD3|Q9HUD3_PSEAE	tr|Q9HUD3|Q9HUD3_PSEAE	3	3	3	>tr|Q9HUD3|Q9HUD3_PSEAE Malic enzyme OS=Pseudomonas aeruginosa (strain ATCC 15692 / PAO1 / 1C / PRS 101 / LMG 12228) GN=PA5046 PE=4 SV=1	1	3	3	3	14.2	14.2	14.2	45.428	422	422	0	31.029	17025000	7				140	3;673;749	True;True;True	3;678;755	3;1208;1209;1354	3;2323;2324;2325;2326;2327;2328;2616	3;2323;2616
tr|Q9HUG0|Q9HUG0_PSEAE	tr|Q9HUG0|Q9HUG0_PSEAE	1	1	1	>tr|Q9HUG0|Q9HUG0_PSEAE Probable carbamoyl transferase OS=Pseudomonas aeruginosa (strain ATCC 15692 / PAO1 / 1C / PRS 101 / LMG 12228) GN=PA5005 PE=4 SV=1	1	1	1	1	2.4	2.4	2.4	66.079	585	585	0.0097087	5.6291	4594600	0				141	388	TRUE	391	679	1317	1317
tr|Q9HV54|Q9HV54_PSEAE	tr|Q9HV54|Q9HV54_PSEAE	2	2	2	>tr|Q9HV54|Q9HV54_PSEAE Transcription termination/antitermination protein NusA OS=Pseudomonas aeruginosa (strain ATCC 15692 / PAO1 / 1C / PRS 101 / LMG 12228) GN=nusA PE=3 SV=1	1	2	2	2	7.5	7.5	7.5	54.658	493	493	0	23.689	3637800	3				142	161;331	True;True	163;334	283;574	637;1139;1140	637;1139
tr|Q9HV96|Q9HV96_PSEAE	tr|Q9HV96|Q9HV96_PSEAE	3	3	3	>tr|Q9HV96|Q9HV96_PSEAE Uncharacterized protein OS=Pseudomonas aeruginosa (strain ATCC 15692 / PAO1 / 1C / PRS 101 / LMG 12228) GN=PA4701 PE=4 SV=1	1	3	3	3	7.9	7.9	7.9	58.376	520	520	0	18.316	13921000	5				143	217;367;394	True;True;True	219;370;397	387;646;647;689;690	818;1267;1268;1334;1335;1336;1337	818;1268;1334
tr|Q9HVA0|Q9HVA0_PSEAE	tr|Q9HVA0|Q9HVA0_PSEAE	1	1	1	>tr|Q9HVA0|Q9HVA0_PSEAE Acetolactate synthase OS=Pseudomonas aeruginosa (strain ATCC 15692 / PAO1 / 1C / PRS 101 / LMG 12228) GN=ilvI PE=3 SV=1	1	1	1	1	3.7	3.7	3.7	63.018	574	574	0	7.3147	1135200	1				144	14	TRUE	14	20	26	26
tr|Q9HVJ1|Q9HVJ1_PSEAE	tr|Q9HVJ1|Q9HVJ1_PSEAE	3	3	3	>tr|Q9HVJ1|Q9HVJ1_PSEAE Probable ATP-binding component of ABC transporter OS=Pseudomonas aeruginosa (strain ATCC 15692 / PAO1 / 1C / PRS 101 / LMG 12228) GN=PA4595 PE=4 SV=1	1	3	3	3	6.5	6.5	6.5	61.32	554	554	0	21.84	14899000	5				145	373;679;835	True;True;True	376;684;841	654;1220;1505;1506	1277;2344;2345;2861;2862	1277;2344;2861
tr|Q9HVS8|Q9HVS8_PSEAE	tr|Q9HVS8|Q9HVS8_PSEAE	1	1	1	>tr|Q9HVS8|Q9HVS8_PSEAE RoxR OS=Pseudomonas aeruginosa (strain ATCC 15692 / PAO1 / 1C / PRS 101 / LMG 12228) GN=roxR PE=4 SV=1	1	1	1	1	7.5	7.5	7.5	20.616	186	186	0	6.0023	311260	1				146	828	TRUE	834	1493	2835	2835
tr|Q9HVU0|Q9HVU0_PSEAE	tr|Q9HVU0|Q9HVU0_PSEAE	1	1	1	>tr|Q9HVU0|Q9HVU0_PSEAE Rod shape-determining protein MreB OS=Pseudomonas aeruginosa (strain ATCC 15692 / PAO1 / 1C / PRS 101 / LMG 12228) GN=mreB PE=4 SV=1	1	1	1	1	7.2	7.2	7.2	36.976	345	345	0	19.562	3576800	8				147	681	TRUE	686	1222;1223	2347;2348;2349;2350;2351;2352;2353;2354	2349
tr|Q9HVY5|Q9HVY5_PSEAE	tr|Q9HVY5|Q9HVY5_PSEAE	2	2	2	>tr|Q9HVY5|Q9HVY5_PSEAE Cytochrome b OS=Pseudomonas aeruginosa (strain ATCC 15692 / PAO1 / 1C / PRS 101 / LMG 12228) GN=PA4430 PE=3 SV=1	1	2	2	2	6.7	6.7	6.7	46.072	403	403	0	15.754	8922500	3				148	253;762	True;True	256;768	444;445;1374	921;922;2651	922;2651
tr|Q9HVY6|Q9HVY6_PSEAE	tr|Q9HVY6|Q9HVY6_PSEAE	4	4	4	>tr|Q9HVY6|Q9HVY6_PSEAE Probable cytochrome c1 OS=Pseudomonas aeruginosa (strain ATCC 15692 / PAO1 / 1C / PRS 101 / LMG 12228) GN=PA4429 PE=4 SV=1	1	4	4	4	20.8	20.8	20.8	28.993	260	260	0	26.826	40361000	12				149	743;783;793;860	True;True;True;True	749;789;799;866	1344;1409;1410;1426;1427;1544	2601;2707;2708;2709;2710;2711;2712;2713;2738;2739;2740;2914	2601;2713;2739;2914
tr|Q9HW49|Q9HW49_PSEAE	tr|Q9HW49|Q9HW49_PSEAE	6	6	6	>tr|Q9HW49|Q9HW49_PSEAE Uncharacterized protein OS=Pseudomonas aeruginosa (strain ATCC 15692 / PAO1 / 1C / PRS 101 / LMG 12228) GN=PA4352 PE=3 SV=1	1	6	6	6	34.6	34.6	34.6	30.972	286	286	0	43.375	61428000	32				150	128;447;805;808;809;836	True;True;True;True;True;True	129;450;811;814;815;842	215;216;806;1456;1457;1460;1461;1462;1507	439;440;441;442;443;444;445;446;447;448;449;450;451;452;1566;1567;2776;2777;2778;2779;2780;2781;2782;2783;2784;2785;2786;2787;2790;2791;2792;2863	439;1566;2777;2791;2792;2863
tr|Q9HW68|Q9HW68_PSEAE	tr|Q9HW68|Q9HW68_PSEAE	3	3	3	>tr|Q9HW68|Q9HW68_PSEAE Probable fumarase OS=Pseudomonas aeruginosa (strain ATCC 15692 / PAO1 / 1C / PRS 101 / LMG 12228) GN=PA4333 PE=4 SV=1	1	3	3	3	12.6	12.6	12.6	54.763	507	507	0	19.611	12735000	5				151	124;167;555	True;True;True	125;169;559	209;210;291;989	429;430;431;432;647;1958	432;647;1958
tr|Q9HW72|Q9HW72_PSEAE	tr|Q9HW72|Q9HW72_PSEAE	1	1	1	>tr|Q9HW72|Q9HW72_PSEAE Pyruvate kinase OS=Pseudomonas aeruginosa (strain ATCC 15692 / PAO1 / 1C / PRS 101 / LMG 12228) GN=pykA PE=3 SV=1	1	1	1	1	5.6	5.6	5.6	52.252	483	483	0	7.2135	6167800	4				152	419	TRUE	422	750;751	1468;1469;1470;1471	1468
tr|Q9HWG9|Q9HWG9_PSEAE	tr|Q9HWG9|Q9HWG9_PSEAE	2	2	2	>tr|Q9HWG9|Q9HWG9_PSEAE Flavin-containing monooxygenase OS=Pseudomonas aeruginosa (strain ATCC 15692 / PAO1 / 1C / PRS 101 / LMG 12228) GN=phzS PE=1 SV=1	1	2	2	2	12.2	12.2	12.2	43.644	402	402	0	22.047	14333000	9				153	416;898	True;True	419;904	743;744;1603	1455;1456;1457;1458;1459;1460;1461;3006;3007	1457;3006
tr|Q9HWQ0|Q9HWQ0_PSEAE	tr|Q9HWQ0|Q9HWQ0_PSEAE	5	5	5	>tr|Q9HWQ0|Q9HWQ0_PSEAE Probable iron-sulfur protein OS=Pseudomonas aeruginosa (strain ATCC 15692 / PAO1 / 1C / PRS 101 / LMG 12228) GN=PA4131 PE=4 SV=1	1	5	5	5	11.7	11.7	11.7	63.991	573	573	0	40.667	35837000	9				154	48;214;295;385;521	True;True;True;True;True	48;216;298;388;524	80;81;379;380;513;514;676;933	156;157;809;810;1044;1045;1046;1314;1827	157;809;1046;1314;1827
tr|Q9HWQ2|Q9HWQ2_PSEAE	tr|Q9HWQ2|Q9HWQ2_PSEAE	1	1	1	>tr|Q9HWQ2|Q9HWQ2_PSEAE Uncharacterized protein OS=Pseudomonas aeruginosa (strain ATCC 15692 / PAO1 / 1C / PRS 101 / LMG 12228) GN=PA4129 PE=4 SV=1	1	1	1	1	13	13	13	18.122	162	162	0	7.9425	1227900	2				155	206	TRUE	208	368	784;785	785
tr|Q9HX05|Q9HX05_PSEAE;tr|Q9I2C4|Q9I2C4_PSEAE	tr|Q9HX05|Q9HX05_PSEAE;tr|Q9I2C4|Q9I2C4_PSEAE	3;2	3;2	3;2	>tr|Q9HX05|Q9HX05_PSEAE Probable aldehyde dehydrogenase OS=Pseudomonas aeruginosa (strain ATCC 15692 / PAO1 / 1C / PRS 101 / LMG 12228) GN=PA4022 PE=3 SV=1;>tr|Q9I2C4|Q9I2C4_PSEAE NAD+ dependent aldehyde dehydrogenase ExaC OS=Pseudomonas aeruginosa (strain	2	3	3	3	11.3	11.3	11.3	54.979	506	506;506	0	22.267	18899000	4				156	82;458;714	True;True;True	83;461;720	149;150;821;1284	327;328;329;1592;2443	327;1592;2443
tr|Q9HX44|Q9HX44_PSEAE	tr|Q9HX44|Q9HX44_PSEAE	1	1	1	>tr|Q9HX44|Q9HX44_PSEAE Probable acyl-CoA dehydrogenase OS=Pseudomonas aeruginosa (strain ATCC 15692 / PAO1 / 1C / PRS 101 / LMG 12228) GN=PA3972 PE=3 SV=1	1	1	1	1	5.1	5.1	5.1	60.338	549	549	0	9.6496	1697100	3				157	829	TRUE	835	1494	2836;2837;2838	2837
tr|Q9HX77|Q9HX77_PSEAE	tr|Q9HX77|Q9HX77_PSEAE	1	1	1	>tr|Q9HX77|Q9HX77_PSEAE Uncharacterized protein OS=Pseudomonas aeruginosa (strain ATCC 15692 / PAO1 / 1C / PRS 101 / LMG 12228) GN=PA3939 PE=4 SV=1	1	1	1	1	2.3	2.3	2.3	32.987	306	306	0.0096618	5.5577	0	1				158	667	TRUE	672	1200	2310	2310
tr|Q9HXM5|Q9HXM5_PSEAE	tr|Q9HXM5|Q9HXM5_PSEAE	2	2	2	>tr|Q9HXM5|Q9HXM5_PSEAE Inosine-5-monophosphate dehydrogenase OS=Pseudomonas aeruginosa (strain ATCC 15692 / PAO1 / 1C / PRS 101 / LMG 12228) GN=guaB PE=1 SV=1	1	2	2	2	7	7	7	51.707	489	489	0	12.943	7547500	4				159	300;804	True;True	303;810	523;524;1455	1064;1065;1066;2775	1066;2775
tr|Q9HY01|Q9HY01_PSEAE	tr|Q9HY01|Q9HY01_PSEAE	1	1	1	>tr|Q9HY01|Q9HY01_PSEAE S-(hydroxymethyl)glutathione dehydrogenase OS=Pseudomonas aeruginosa (strain ATCC 15692 / PAO1 / 1C / PRS 101 / LMG 12228) GN=adhC PE=3 SV=1	1	1	1	1	4.1	4.1	4.1	39.208	370	370	0.004902	5.6759	4729300	1				160	375	TRUE	378	656	1279	1279
[truncated: 53 more rows]

## Sheet: 4-2 proteinGroups Probe 12
Protein IDs	Majority protein IDs	Peptide counts (all)	Peptide counts (razor+unique)	Peptide counts (unique)	Fasta headers	Number of proteins	Peptides	Razor + unique peptides	Unique peptides	Sequence coverage [%]	Unique + razor sequence coverage [%]	Unique sequence coverage [%]	Mol. weight [kDa]	Sequence length	Sequence lengths	Q-value	Score	Intensity	MS/MS Count	Only identified by site	Reverse	Potential contaminant	id	Peptide IDs	Peptide is razor	Mod. peptide IDs	Evidence IDs	MS/MS IDs	Best MS/MS	Oxidation (M) site IDs	Oxidation (M) site positions
[truncated: 218 more rows]

[truncated: 6 more sheets: 4-2 Sheet1, 4-2 Sheet2, 4-3 proteinGroups C4HSL-1, 4-3 proteinGroups  Probe 12, 4-3 Sheet1, 4-3 Sheet2]
