# Supplementary material for: Short-chain reactive probes as tools to unravel the Pseudomonas aeruginosa quorum sensing regulon
Source: Royal Society of Chemistry journal article supplement (doi:10.1039/d0sc04444j), 2021-01-01
Supplement: d0sc04444j2.zip [file Experiment 5.xlsx]

## Sheet: Key
Experiment 5	Chemical proteomics with Probe 12: Identification of proteins after incubation and photoaffinity labeling with Probe 12 in wild-type P. aeruginosa strain PAO1
Experimental methods	Yellow, Green and Blue sheets are independent biological replicates: Bacteria were grown, harvested, lysed, the lysates were incubated with C4HSL/Probe 12 in triplicates and labeled, downstream processed, streptavidin affinity enriched and trypticaly digested on the same day. StageTips desalting was done on the next day and LC-MS/MS analysis was performed later
Excel sheets content
5-1 proteinGroups C4HSL-1	Experiment 5 repeat 1 Raw data results of C4HSL control labeling
5-1 proteinGroups Probe 12	Experiment 5 repeat 1 Raw data results of Probe 12 labeling
5-1 Sheet1	Experiment 5 repeat 1: C4HSL results and unique Probe 12 results (C4HSL hits are subtracted)
5-1 Sheet2	Experiment 5 repeat 1: Filtered data of proteins for Probe 12 labeling which retain razor+unique peptides requirement of >1 for each replicate (filled with green)
For Green and Blue sheets-same as above only repeat experiment number changes (5-2, 5-3)

## Sheet: 5-1 proteinGroups C4HSL-1
Protein IDs	Majority protein IDs	Peptide counts (all)	Peptide counts (razor+unique)	Peptide counts (unique)	Fasta headers	Number of proteins	Peptides	Razor + unique peptides	Unique peptides	Sequence coverage [%]	Unique + razor sequence coverage [%]	Unique sequence coverage [%]	Mol. weight [kDa]	Sequence length	Sequence lengths	Q-value	Score	Intensity	MS/MS Count	Only identified by site	Reverse	Potential contaminant	id	Peptide IDs	Peptide is razor	Mod. peptide IDs	Evidence IDs	MS/MS IDs	Best MS/MS	Oxidation (M) site IDs	Oxidation (M) site positions
CON__P00761	CON__P00761	4	4	4	>P00761 SWISS-PROT:P00761|TRYP_PIG Trypsin - Sus scrofa (Pig).	1	4	4	4	25.1	25.1	25.1	24.409	231	231	0	55.976	1134300000	67			+	0	429;541;613;927	True;True;True;True	433;545;617;937	719;720;721;722;929;930;931;932;933;934;1083;1084;1650;1651;1652;1653;1654;1655;1656	1307;1308;1309;1310;1311;1312;1313;1314;1315;1316;1317;1683;1684;1685;1686;1687;1688;1689;1690;1691;1692;1693;1694;1695;1696;1697;1698;1699;1700;1701;1702;1703;1704;1705;1706;1707;1708;1709;1710;1711;1712;1713;1714;1715;1716;1717;1718;1972;1973;1974;1975;1976;1977;1978;1979;1980;1981;1982;1983;3092;3093;3094;3095;3096;3097;3098;3099	1317;1697;1974;3092
CON__P04264;CON__ENSEMBL:ENSBTAP00000038253;CON__Q9R0H5;CON__Q6NXH9;CON__Q8BGZ7;CON__P50446;CON__Q6IFZ6;CON__Q7Z794;CON__Q922U2;CON__Q5XQN5;CON__P35908	CON__P04264	6;2;1;1;1;1;1;1;1;1;1	6;2;1;1;1;1;1;1;1;1;1	6;2;1;1;1;1;1;1;1;1;1	>P04264 SWISS-PROT:P04264 Tax_Id=9606 Gene_Symbol=KRT1 Keratin, type II cytoskeletal 1	11	6	6	6	13.8	13.8	13.8	66.017	644	644;606;524;539;551;553;572;578;580;601;645	0	63.973	68342000	21			+	1	22;281;326;813;818;1055	True;True;True;True;True;True	22;283;329;822;827;1065	38;39;471;472;547;548;1447;1448;1456;1882	85;86;893;894;895;896;897;898;1007;1008;1009;1010;1011;1012;2652;2653;2654;2655;2664;2665;3578	86;895;1008;2654;2665;3578
CON__P07477	CON__P07477	1	1	1	>P07477 SWISS-PROT:P07477 Tax_Id=9606 Gene_Symbol=PRSS1 Trypsin-1 precursor	1	1	1	1	8.1	8.1	8.1	26.558	247	247	0.0084034	5.3872	25189000	4			+	2	542	TRUE	546	935;936	1719;1720;1721;1722	1719
CON__P13645;CON__P02535-1	CON__P13645;CON__P02535-1	4;2	4;2	4;2	>P13645 SWISS-PROT:P13645 Tax_Id=9606 Gene_Symbol=KRT10 Keratin, type I cytoskeletal 10;>P02535-1 SWISS-PROT:P02535-1 Tax_Id=10090 Gene_Symbol=Krt10 Isoform 1 of Keratin, type I cytoskeletal 10	2	4	4	4	8.8	8.8	8.8	59.51	593	593;570	0	29.246	8091400	8			+	3	74;357;527;831	True;True;True;True	75;360;531;841	125;126;602;906;907;1476	247;248;1114;1115;1649;1650;2712;2713	247;1115;1650;2713
CON__Streptavidin	CON__Streptavidin	8	8	8	>Streptavidin (S.avidinii)	1	8	8	8	49.4	49.4	49.4	16.622	160	160	0	125.91	1656300000	317			+	4	449;450;700;836;1053;1054;1084;1085	True;True;True;True;True;True;True;True	453;454;707;846;1063;1064;1094;1095	753;754;755;756;757;758;759;760;761;762;763;764;765;766;767;768;769;770;771;1243;1244;1245;1246;1247;1248;1249;1250;1251;1252;1253;1254;1255;1256;1257;1258;1259;1260;1483;1484;1485;1486;1487;1488;1489;1490;1491;1492;1493;1872;1873;1874;1875;1876;1877;1878;1879;1880;1881;1929;1930;1931;1932	1366;1367;1368;1369;1370;1371;1372;1373;1374;1375;1376;1377;1378;1379;1380;1381;1382;1383;1384;1385;1386;1387;1388;1389;1390;1391;1392;1393;1394;1395;1396;1397;1398;1399;1400;1401;1402;1403;1404;1405;1406;1407;1408;1409;1410;1411;1412;1413;1414;1415;1416;1417;1418;1419;1420;1421;1422;1423;1424;1425;1426;1427;1428;1429;1430;2290;2291;2292;2293;2294;2295;2296;2297;2298;2299;2300;2301;2302;2303;2304…	1408;1430;2299;2735;3488;3577;3641;3665
REV__tr|Q9HXW2|Q9HXW2_PSEAE	REV__tr|Q9HXW2|Q9HXW2_PSEAE	1	1	1	>tr|Q9HXW2|Q9HXW2_PSEAE Probable transcriptional regulator OS=Pseudomonas aeruginosa (strain ATCC 15692 / PAO1 / 1C / PRS 101 / LMG 12228) GN=PA3678 PE=4 SV=1	1	1	1	1	0	0	0	23.15	212	212	0.0048309	5.9226	126610000	12		+		5	491	TRUE	495	850	1564;1565;1566;1567;1568;1569;1570;1571;1572;1573;1574;1575	1566
REV__tr|Q9I0B7|Q9I0B7_PSEAE	REV__tr|Q9I0B7|Q9I0B7_PSEAE	1	1	1	>tr|Q9I0B7|Q9I0B7_PSEAE Probable chaperone OS=Pseudomonas aeruginosa (strain ATCC 15692 / PAO1 / 1C / PRS 101 / LMG 12228) GN=PA2725 PE=4 SV=1	1	1	1	1	0	0	0	68.829	627	627	0.0087719	5.4497	19892000	1		+		6	717	TRUE	724	1286	2376	2376
sp|G3XD12|HCNC_PSEAE	sp|G3XD12|HCNC_PSEAE	3	3	3	>sp|G3XD12|HCNC_PSEAE Hydrogen cyanide synthase subunit HcnC OS=Pseudomonas aeruginosa (strain ATCC 15692 / PAO1 / 1C / PRS 101 / LMG 12228) GN=hcnC PE=1 SV=1	1	3	3	3	10.6	10.6	10.6	45.281	417	417	0	23.719	6817000	2				7	868;882;1083	True;True;True	878;892;1093	1560;1580;1928	2944;2967;3640	2944;2967;3640
sp|G3XD23|WBPB_PSEAE	sp|G3XD23|WBPB_PSEAE	6	6	6	>sp|G3XD23|WBPB_PSEAE UDP-N-acetyl-2-amino-2-deoxy-D-glucuronate oxidase OS=Pseudomonas aeruginosa (strain ATCC 15692 / PAO1 / 1C / PRS 101 / LMG 12228) GN=wbpB PE=1 SV=1	1	6	6	6	25	25	25	35.717	316	316	0	45.716	52217000	14				8	2;647;710;736;784;1036	True;True;True;True;True;True	2;651;717;743;793;1046	3;4;1144;1145;1276;1318;1401;1843;1844	5;6;7;8;9;2099;2100;2101;2362;2441;2580;2581;3416;3417	5;2099;2362;2441;2581;3416
sp|G3XD61|WBPI_PSEAE	sp|G3XD61|WBPI_PSEAE	6	6	6	>sp|G3XD61|WBPI_PSEAE UDP-2,3-diacetamido-2,3-dideoxy-D-glucuronate 2-epimerase OS=Pseudomonas aeruginosa (strain ATCC 15692 / PAO1 / 1C / PRS 101 / LMG 12228) GN=wbpI PE=1 SV=1	1	6	6	6	27.7	27.7	27.7	38.907	354	354	0	77.294	71480000	18				9	136;475;672;803;874;979	True;True;True;True;True;True	137;479;677;812;884;989	223;224;808;809;1191;1192;1431;1432;1569;1570;1745;1746	409;410;411;412;413;1485;1486;1487;2188;2189;2632;2633;2634;2954;2955;2956;3236;3237	409;1485;2189;2634;2954;3236
sp|G3XD94|UGND_PSEAE	sp|G3XD94|UGND_PSEAE	6	6	6	>sp|G3XD94|UGND_PSEAE UDP-N-acetyl-D-glucosamine 6-dehydrogenase OS=Pseudomonas aeruginosa (strain ATCC 15692 / PAO1 / 1C / PRS 101 / LMG 12228) GN=wbpA PE=1 SV=1	1	6	6	6	19.3	19.3	19.3	48.155	436	436	0	39.262	17360000	9				10	146;211;253;258;668;746	True;True;True;True;True;True	147;213;255;260;673;753	242;358;359;425;426;434;1185;1333	441;702;703;704;815;816;831;2181;2469	441;702;815;831;2181;2469
sp|O30508|ARUC_PSEAE	sp|O30508|ARUC_PSEAE	2	2	2	>sp|O30508|ARUC_PSEAE Succinylornithine transaminase/acetylornithine aminotransferase OS=Pseudomonas aeruginosa (strain ATCC 15692 / PAO1 / 1C / PRS 101 / LMG 12228) GN=aruC PE=1 SV=2	1	2	2	2	8.6	8.6	8.6	43.747	406	406	0	28.673	6337100	2				11	814;936	True;True	823;946	1449;1670	2656;3116;3117	2656;3116
sp|O52759|RS4_PSEAE	sp|O52759|RS4_PSEAE	5	5	5	>sp|O52759|RS4_PSEAE 30S ribosomal protein S4 OS=Pseudomonas aeruginosa (strain ATCC 15692 / PAO1 / 1C / PRS 101 / LMG 12228) GN=rpsD PE=3 SV=2	1	5	5	5	25.2	25.2	25.2	23.277	206	206	0	49.479	68770000	13				12	67;223;518;610;933	True;True;True;True;True	68;225;522;614;943	114;115;377;893;894;1077;1078;1664;1665	233;234;235;236;734;1634;1635;1962;1963;1964;1965;1966;3110;3111	235;734;1634;1966;3110
sp|O52760|RPOA_PSEAE	sp|O52760|RPOA_PSEAE	6	6	6	>sp|O52760|RPOA_PSEAE DNA-directed RNA polymerase subunit alpha OS=Pseudomonas aeruginosa (strain ATCC 15692 / PAO1 / 1C / PRS 101 / LMG 12228) GN=rpoA PE=3 SV=2	1	6	6	6	19.5	19.5	19.5	36.649	333	333	0	39.933	25423000	8				13	29;385;467;607;687;1008	True;True;True;True;True;True	29;389;471;611;692;1018	51;645;794;1073;1214;1215;1797;1798	102;1200;1465;1958;2215;2216;3346;3347	102;1200;1465;1958;2215;3347
sp|O52762|CATA_PSEAE	sp|O52762|CATA_PSEAE	2	2	2	>sp|O52762|CATA_PSEAE Catalase OS=Pseudomonas aeruginosa (strain ATCC 15692 / PAO1 / 1C / PRS 101 / LMG 12228) GN=katA PE=1 SV=1	1	2	2	2	4.8	4.8	4.8	55.588	482	482	0	16.894	18081000	5				14	355;530	True;True	358;534	599;600;911;912	1110;1111;1112;1655;1656	1111;1656
sp|O54439|ACP1_PSEAE	sp|O54439|ACP1_PSEAE	2	2	2	>sp|O54439|ACP1_PSEAE Acyl carrier protein 1 OS=Pseudomonas aeruginosa (strain ATCC 15692 / PAO1 / 1C / PRS 101 / LMG 12228) GN=acpP1 PE=3 SV=4	1	2	2	2	32.1	32.1	32.1	8.7406	78	78	0	16.368	23220000	5				15	469;470	True;True	473;474	797;798;799;800;801	1471;1472;1473;1474;1475	1472;1475
sp|O68822|AMPA_PSEAE	sp|O68822|AMPA_PSEAE	15	15	15	>sp|O68822|AMPA_PSEAE Cytosol aminopeptidase OS=Pseudomonas aeruginosa (strain ATCC 15692 / PAO1 / 1C / PRS 101 / LMG 12228) GN=pepA PE=3 SV=1	1	15	15	15	44.2	44.2	44.2	52.331	495	495	0	153.14	420300000	73				16	41;138;139;204;240;305;337;342;484;506;567;584;619;855;949	True;True;True;True;True;True;True;True;True;True;True;True;True;True;True	41;139;140;206;242;308;340;345;488;510;571;588;623;865;959	68;227;228;229;230;347;404;405;515;516;568;569;579;580;832;833;874;875;1006;1007;1034;1035;1036;1037;1094;1095;1531;1532;1693;1694	130;131;418;419;420;421;422;423;424;425;426;682;683;684;782;783;784;785;786;966;967;968;1047;1048;1078;1079;1080;1081;1082;1083;1084;1085;1086;1087;1535;1536;1609;1610;1611;1612;1856;1857;1858;1859;1860;1861;1862;1893;1894;1895;1896;1897;1898;1899;1900;1901;1902;1903;1904;1905;1906;1907;1908;2000;2001;2002;2003;2859;2860;2861;2862;3152;3153	130;422;426;682;786;967;1047;1079;1536;1609;1857;1896;2003;2859;3152
sp|O69754|PHZF_PSEAE	sp|O69754|PHZF_PSEAE	2	2	2	>sp|O69754|PHZF_PSEAE Trans-2,3-dihydro-3-hydroxyanthranilate isomerase OS=Pseudomonas aeruginosa (strain ATCC 15692 / PAO1 / 1C / PRS 101 / LMG 12228) GN=phzF1 PE=3 SV=2	1	2	2	2	20.5	20.5	20.5	30.342	278	278	0	12.698	20213000	4				17	412;662	True;True	416;667	693;1174;1175	1276;2158;2159;2160	1276;2158
sp|O82850|RS2_PSEAE	sp|O82850|RS2_PSEAE	2	2	2	>sp|O82850|RS2_PSEAE 30S ribosomal protein S2 OS=Pseudomonas aeruginosa (strain ATCC 15692 / PAO1 / 1C / PRS 101 / LMG 12228) GN=rpsB PE=3 SV=2	1	2	2	2	9.8	9.8	9.8	27.336	246	246	0	15.222	26160000	5				18	884;1039	True;True	894;1049	1582;1583;1849;1850	2969;2970;2971;3423;3424	2969;3424
sp|O86428|ILVE_PSEAE	sp|O86428|ILVE_PSEAE	1	1	1	>sp|O86428|ILVE_PSEAE Branched-chain-amino-acid aminotransferase OS=Pseudomonas aeruginosa (strain ATCC 15692 / PAO1 / 1C / PRS 101 / LMG 12228) GN=ilvE PE=1 SV=2	1	1	1	1	3.9	3.9	3.9	34.084	307	307	0	6.6744	6416400	1				19	150	TRUE	151	249;250	449;450	450
sp|O87125|CHEB1_PSEAE	sp|O87125|CHEB1_PSEAE	1	1	1	>sp|O87125|CHEB1_PSEAE Chemotaxis response regulator protein-glutamate methylesterase of group 1 operon OS=Pseudomonas aeruginosa (strain ATCC 15692 / PAO1 / 1C / PRS 101 / LMG 12228) GN=cheB1 PE=1 SV=2	1	1	1	1	4.6	4.6	4.6	39.004	368	368	0.0046948	5.6989	252460	2				20	938	TRUE	948	1673;1674	3120;3121	3120
sp|P04739|FMPO_PSEAE	sp|P04739|FMPO_PSEAE	2	2	2	>sp|P04739|FMPO_PSEAE Fimbrial protein OS=Pseudomonas aeruginosa (strain ATCC 15692 / PAO1 / 1C / PRS 101 / LMG 12228) GN=pilA PE=1 SV=1	1	2	2	2	15.4	15.4	15.4	15.512	149	149	0	17.295	19400000	3				21	791;909	True;True	800;919	1413;1414;1622	2609;2610;3043	2610;3043
sp|P05384|DBHB_PSEAE	sp|P05384|DBHB_PSEAE	1	1	1	>sp|P05384|DBHB_PSEAE DNA-binding protein HU-beta OS=Pseudomonas aeruginosa (strain ATCC 15692 / PAO1 / 1C / PRS 101 / LMG 12228) GN=hupB PE=1 SV=3	1	1	1	1	15.6	15.6	15.6	9.0865	90	90	0	10.639	16725000	3				22	71	TRUE	72	121;122	242;243;244	242
sp|P08280|RECA_PSEAE	sp|P08280|RECA_PSEAE	1	1	1	>sp|P08280|RECA_PSEAE Protein RecA OS=Pseudomonas aeruginosa (strain ATCC 15692 / PAO1 / 1C / PRS 101 / LMG 12228) GN=recA PE=3 SV=1	1	1	1	1	5.2	5.2	5.2	36.879	346	346	0	8.8569	1068100	2				23	822	TRUE	831	1461	2670;2671	2671
sp|P08308|OTCC_PSEAE	sp|P08308|OTCC_PSEAE	9	9	9	>sp|P08308|OTCC_PSEAE Ornithine carbamoyltransferase, catabolic OS=Pseudomonas aeruginosa (strain ATCC 15692 / PAO1 / 1C / PRS 101 / LMG 12228) GN=arcB PE=1 SV=3	1	9	9	9	28.3	28.3	28.3	38.108	336	336	0	62.782	168230000	29				24	242;265;433;620;697;716;726;750;1075	True;True;True;True;True;True;True;True;True	244;267;437;624;704;723;733;757;1085	408;409;446;447;727;728;1096;1238;1239;1284;1285;1301;1302;1340;1341;1915;1916	791;792;859;860;861;862;863;864;865;866;867;1323;1324;2004;2283;2284;2285;2286;2374;2375;2402;2403;2404;2483;2484;3622;3623;3624;3625	792;865;1324;2004;2283;2375;2404;2483;3622
sp|P09591|EFTU_PSEAE	sp|P09591|EFTU_PSEAE	19	19	19	>sp|P09591|EFTU_PSEAE Elongation factor Tu OS=Pseudomonas aeruginosa (strain ATCC 15692 / PAO1 / 1C / PRS 101 / LMG 12228) GN=tufA PE=1 SV=2	1	19	19	19	53.4	53.4	53.4	43.369	397	397	0	220.81	2260300000	274				25	20;37;42;62;160;176;177;225;270;338;382;629;630;694;764;765;905;911;993	True;True;True;True;True;True;True;True;True;True;True;True;True;True;True;True;True;True;True	20;37;42;62;63;161;177;178;179;227;272;341;386;633;634;700;701;771;772;773;774;915;921;1003	36;62;63;69;70;100;101;102;103;104;105;106;268;269;293;294;295;296;297;298;299;300;301;302;380;381;455;570;571;572;573;639;640;641;642;1108;1109;1110;1111;1228;1229;1230;1231;1232;1233;1234;1235;1362;1363;1364;1365;1366;1367;1616;1617;1624;1625;1772;1773	82;83;120;121;122;123;124;125;132;133;134;135;136;137;138;139;140;141;142;143;144;145;146;147;148;149;150;201;202;203;204;205;206;207;208;209;210;211;212;213;214;215;216;217;218;219;220;221;499;500;545;546;547;548;549;550;551;552;553;554;555;556;557;558;559;560;561;562;563;564;565;566;567;568;569;570;571;572;573;574;575;576;577;578;579;580;581;582;583;584;585;586;587;588;589;590;591;592;593;594;5…	83;121;133;202;499;568;593;739;875;1068;1174;2031;2043;2250;2521;2530;3028;3047;3290	0;1;2;3;4;5	140;152;177;216;362;372
sp|P11221|OPRI_PSEAE	sp|P11221|OPRI_PSEAE	2	2	2	>sp|P11221|OPRI_PSEAE Major outer membrane lipoprotein OS=Pseudomonas aeruginosa (strain ATCC 15692 / PAO1 / 1C / PRS 101 / LMG 12228) GN=oprI PE=3 SV=1	1	2	2	2	25.3	25.3	25.3	8.8348	83	83	0	17.051	9228400	14				26	480;618	True;True	484;622	817;818;1092;1093	1498;1499;1500;1501;1502;1991;1992;1993;1994;1995;1996;1997;1998;1999	1499;1997
sp|P11436|AMIE_PSEAE	sp|P11436|AMIE_PSEAE	1	1	1	>sp|P11436|AMIE_PSEAE Aliphatic amidase OS=Pseudomonas aeruginosa (strain ATCC 15692 / PAO1 / 1C / PRS 101 / LMG 12228) GN=amiE PE=1 SV=2	1	1	1	1	3.8	3.8	3.8	38.494	346	346	0	8.111	257030	1				27	383	TRUE	387	643	1198	1198
sp|P13794|PORF_PSEAE	sp|P13794|PORF_PSEAE	5	5	5	>sp|P13794|PORF_PSEAE Outer membrane porin F OS=Pseudomonas aeruginosa (strain ATCC 15692 / PAO1 / 1C / PRS 101 / LMG 12228) GN=oprF PE=1 SV=1	1	5	5	5	19.7	19.7	19.7	37.639	350	350	0	41.272	53880000	18				28	192;768;776;929;984	True;True;True;True;True	194;777;785;939;994	325;326;1371;1372;1384;1658;1659;1754;1755	643;644;645;646;2539;2540;2541;2542;2557;3101;3102;3103;3104;3105;3246;3247;3248;3249;3250	646;2539;2557;3104;3248
sp|P13981|ARCA_PSEAE	sp|P13981|ARCA_PSEAE	22	22	22	>sp|P13981|ARCA_PSEAE Arginine deiminase OS=Pseudomonas aeruginosa (strain ATCC 15692 / PAO1 / 1C / PRS 101 / LMG 12228) GN=arcA PE=1 SV=2	1	22	22	22	55	55	55	46.435	418	418	0	271.85	1670400000	223				29	56;170;179;229;256;263;335;463;481;482;483;499;735;744;751;774;846;865;866;960;982;1019	True;True;True;True;True;True;True;True;True;True;True;True;True;True;True;True;True;True;True;True;True;True	56;171;181;231;258;265;338;467;485;486;487;503;742;751;758;783;856;875;876;970;992;1029	92;93;282;283;305;306;388;389;430;431;440;441;442;443;562;563;564;565;788;789;819;820;821;822;823;824;825;826;827;828;829;830;831;863;864;1316;1317;1327;1328;1342;1343;1380;1381;1382;1513;1514;1553;1554;1555;1556;1557;1712;1713;1751;1816;1817	186;187;188;189;190;191;192;516;517;518;519;520;521;522;523;524;525;526;606;607;608;609;610;611;612;613;614;615;616;751;752;753;754;755;756;757;758;759;820;821;822;823;824;837;838;839;840;841;842;843;844;845;846;847;848;849;850;851;852;853;1034;1035;1036;1037;1038;1039;1040;1041;1042;1043;1044;1453;1454;1455;1456;1457;1458;1459;1503;1504;1505;1506;1507;1508;1509;1510;1511;1512;1513;1514;1515;1516…	187;524;614;752;822;852;1038;1454;1506;1515;1517;1597;2434;2459;2485;2555;2810;2893;2931;3183;3243;3378
sp|P13982|ARCC_PSEAE	sp|P13982|ARCC_PSEAE	1	1	1	>sp|P13982|ARCC_PSEAE Carbamate kinase OS=Pseudomonas aeruginosa (strain ATCC 15692 / PAO1 / 1C / PRS 101 / LMG 12228) GN=arcC PE=3 SV=1	1	1	1	1	3.9	3.9	3.9	33.08	310	310	0.0085106	5.4005	381190	1				30	59	TRUE	59	97	198	198
sp|P14165|CISY_PSEAE	sp|P14165|CISY_PSEAE	5	5	5	>sp|P14165|CISY_PSEAE Citrate synthase OS=Pseudomonas aeruginosa (strain ATCC 15692 / PAO1 / 1C / PRS 101 / LMG 12228) GN=gltA PE=3 SV=2	1	5	5	5	14	14	14	47.694	428	428	0	35.669	32705000	13				31	63;318;381;684;724	True;True;True;True;True	64;321;385;689;731	107;108;534;637;638;1210;1211;1298;1299	222;223;224;225;226;989;1171;1172;2211;2212;2398;2399;2400	223;989;1171;2211;2399
sp|P23621|PHOR_PSEAE	sp|P23621|PHOR_PSEAE	1	1	1	>sp|P23621|PHOR_PSEAE Phosphate regulon sensor protein PhoR OS=Pseudomonas aeruginosa (strain ATCC 15692 / PAO1 / 1C / PRS 101 / LMG 12228) GN=phoR PE=3 SV=2	1	1	1	1	4.1	4.1	4.1	50.119	443	443	0.0084746	5.3914	405780	2				32	358	TRUE	361	603	1116;1117	1116
sp|P29365|DHOM_PSEAE	sp|P29365|DHOM_PSEAE	1	1	1	>sp|P29365|DHOM_PSEAE Homoserine dehydrogenase OS=Pseudomonas aeruginosa (strain ATCC 15692 / PAO1 / 1C / PRS 101 / LMG 12228) GN=hom PE=3 SV=2	1	1	1	1	3.5	3.5	3.5	46.223	434	434	0	6.6214	5626000	0				33	622	TRUE	626	1098;1099	2006;2007	2007
sp|P30718|CH60_PSEAE	sp|P30718|CH60_PSEAE	12	12	12	>sp|P30718|CH60_PSEAE 60 kDa chaperonin OS=Pseudomonas aeruginosa (strain ATCC 15692 / PAO1 / 1C / PRS 101 / LMG 12228) GN=groL PE=1 SV=3	1	12	12	12	38.8	38.8	38.8	57.085	547	547	0	99.344	125080000	34				34	9;52;103;106;251;272;380;676;754;755;797;937	True;True;True;True;True;True;True;True;True;True;True;True	9;52;104;107;253;274;384;681;761;762;806;947	15;16;85;86;171;172;175;176;177;178;422;457;636;1199;1200;1346;1347;1348;1422;1671;1672	41;42;43;44;45;172;173;174;175;176;177;178;179;180;324;325;326;327;330;331;332;333;334;335;812;877;1170;2198;2199;2494;2495;2496;2618;3118;3119	41;177;326;332;812;877;1170;2199;2494;2495;2618;3118
sp|P37798|ACCC_PSEAE	sp|P37798|ACCC_PSEAE	9	9	9	>sp|P37798|ACCC_PSEAE Biotin carboxylase OS=Pseudomonas aeruginosa (strain ATCC 15692 / PAO1 / 1C / PRS 101 / LMG 12228) GN=accC PE=1 SV=1	1	9	9	9	30.1	30.1	30.1	48.887	449	449	0	79.634	106310000	24				35	57;301;701;802;857;955;959;998;1028	True;True;True;True;True;True;True;True;True	57;304;708;811;867;965;969;1008;1038	94;510;1261;1262;1429;1430;1538;1539;1703;1704;1710;1711;1780;1830;1831	193;960;961;2345;2346;2347;2629;2630;2631;2868;2869;3171;3172;3173;3180;3181;3306;3307;3395;3396;3397;3398;3399;3400	193;961;2347;2631;2868;3172;3181;3307;3398
sp|P37799|BCCP_PSEAE	sp|P37799|BCCP_PSEAE	8	8	8	>sp|P37799|BCCP_PSEAE Biotin carboxyl carrier protein of acetyl-CoA carboxylase OS=Pseudomonas aeruginosa (strain ATCC 15692 / PAO1 / 1C / PRS 101 / LMG 12228) GN=accB PE=3 SV=1	1	8	8	8	62.2	62.2	62.2	16.455	156	156	0	122.22	1510900000	158				36	8;486;487;560;561;593;827;849	True;True;True;True;True;True;True;True	8;490;491;564;565;597;836;837;859	13;14;837;838;839;840;841;842;843;844;845;974;975;976;977;978;979;980;981;982;983;984;985;986;987;988;989;990;991;992;993;994;995;996;997;1052;1467;1468;1469;1470;1518;1519;1520;1521;1522;1523	23;24;25;26;27;28;29;30;31;32;33;34;35;36;37;38;39;40;1540;1541;1542;1543;1544;1545;1546;1547;1548;1549;1550;1551;1552;1553;1554;1555;1556;1557;1558;1559;1784;1785;1786;1787;1788;1789;1790;1791;1792;1793;1794;1795;1796;1797;1798;1799;1800;1801;1802;1803;1804;1805;1806;1807;1808;1809;1810;1811;1812;1813;1814;1815;1816;1817;1818;1819;1820;1821;1822;1823;1824;1825;1826;1827;1828;1829;1830;1831;1832;…	33;1543;1558;1817;1836;1928;2686;2835	6	87
sp|P38100|CARB_PSEAE	sp|P38100|CARB_PSEAE	14	14	14	>sp|P38100|CARB_PSEAE Carbamoyl-phosphate synthase large chain OS=Pseudomonas aeruginosa (strain ATCC 15692 / PAO1 / 1C / PRS 101 / LMG 12228) GN=carB PE=3 SV=3	1	14	14	14	19.6	19.6	19.6	117.33	1073	1073	0	115.11	59110000	29				37	64;73;101;209;293;344;369;509;517;596;643;693;841;890	True;True;True;True;True;True;True;True;True;True;True;True;True;True	65;74;102;211;296;347;373;513;521;600;647;699;851;900	109;124;168;354;355;356;497;498;582;619;880;881;892;1055;1135;1136;1227;1505;1506;1594;1595	227;246;321;693;694;695;696;697;698;699;700;944;945;1089;1147;1619;1620;1632;1633;1933;2074;2075;2076;2077;2235;2793;2794;2991;2992;2993	227;246;321;694;945;1089;1147;1620;1633;1933;2076;2235;2794;2992
sp|P43336|PHHC_PSEAE	sp|P43336|PHHC_PSEAE	4	4	4	>sp|P43336|PHHC_PSEAE Aromatic-amino-acid aminotransferase OS=Pseudomonas aeruginosa (strain ATCC 15692 / PAO1 / 1C / PRS 101 / LMG 12228) GN=phhC PE=3 SV=2	1	4	4	4	15	15	15	43.273	399	399	0	34.461	30106000	10				38	12;419;497;990	True;True;True;True	12;423;501;1000	21;22;703;860;861;1766;1767	52;53;1287;1588;1589;1590;1591;3270;3271;3272	53;1287;1589;3272
sp|P47203|FTSA_PSEAE	sp|P47203|FTSA_PSEAE	3	3	3	>sp|P47203|FTSA_PSEAE Cell division protein FtsA OS=Pseudomonas aeruginosa (strain ATCC 15692 / PAO1 / 1C / PRS 101 / LMG 12228) GN=ftsA PE=3 SV=2	1	3	3	3	10.1	10.1	10.1	44.646	417	417	0	20.884	10151000	5				39	658;894;967	True;True;True	663;904;977	1167;1600;1724;1725	2149;2150;3004;3209;3210	2150;3004;3210
sp|P47204|FTSZ_PSEAE	sp|P47204|FTSZ_PSEAE	2	2	2	>sp|P47204|FTSZ_PSEAE Cell division protein FtsZ OS=Pseudomonas aeruginosa (strain ATCC 15692 / PAO1 / 1C / PRS 101 / LMG 12228) GN=ftsZ PE=1 SV=2	1	2	2	2	7.9	7.9	7.9	41.218	394	394	0	30.67	4085300	5				40	345;1016	True;True	348;1026	583;584;1810;1811;1812	1090;1091;3363;3364;3365	1091;3363
sp|P48247|GSA_PSEAE	sp|P48247|GSA_PSEAE	3	3	3	>sp|P48247|GSA_PSEAE Glutamate-1-semialdehyde 2,1-aminomutase OS=Pseudomonas aeruginosa (strain ATCC 15692 / PAO1 / 1C / PRS 101 / LMG 12228) GN=hemL PE=1 SV=2	1	3	3	3	13.3	13.3	13.3	45.397	427	427	0	37.739	26938000	6				41	53;692;922	True;True;True	53;698;932	87;88;1225;1226;1641	181;182;2233;2234;3074;3075	181;2234;3074
sp|P50987|ARLY_PSEAE	sp|P50987|ARLY_PSEAE	1	1	1	>sp|P50987|ARLY_PSEAE Argininosuccinate lyase OS=Pseudomonas aeruginosa (strain ATCC 15692 / PAO1 / 1C / PRS 101 / LMG 12228) GN=argH PE=3 SV=2	1	1	1	1	2.8	2.8	2.8	51.64	464	464	0	10.491	3957800	2				42	935	TRUE	945	1668;1669	3114;3115	3115
sp|P53593|SUCC_PSEAE	sp|P53593|SUCC_PSEAE	18	18	18	>sp|P53593|SUCC_PSEAE Succinyl-CoA ligase [ADP-forming] subunit beta OS=Pseudomonas aeruginosa (strain ATCC 15692 / PAO1 / 1C / PRS 101 / LMG 12228) GN=sucC PE=3 SV=2	1	18	18	18	49.7	49.7	49.7	41.542	388	388	0	194.23	398670000	63				43	35;132;144;233;234;250;415;426;446;447;526;532;533;679;723;753;758;965	True;True;True;True;True;True;True;True;True;True;True;True;True;True;True;True;True;True	35;133;145;235;236;252;419;430;450;451;530;536;537;684;730;760;765;975	59;60;215;238;239;394;395;420;421;696;697;713;714;748;749;750;904;905;914;915;916;917;1203;1296;1297;1345;1352;1353;1719;1720;1721;1722	114;115;116;117;118;397;398;399;437;438;765;766;809;810;811;1279;1280;1298;1299;1358;1359;1360;1361;1362;1363;1647;1648;1658;1659;1660;1661;1662;1663;1664;1665;2203;2388;2389;2390;2391;2392;2393;2394;2395;2396;2397;2493;2500;2501;2502;2503;2504;2505;3195;3196;3197;3198;3199;3200;3201;3202;3203;3204;3205;3206	117;398;437;765;766;811;1280;1299;1358;1363;1647;1658;1665;2203;2394;2493;2501;3196
sp|P55218|METZ_PSEAE	sp|P55218|METZ_PSEAE	1	1	1	>sp|P55218|METZ_PSEAE O-succinylhomoserine sulfhydrylase OS=Pseudomonas aeruginosa (strain ATCC 15692 / PAO1 / 1C / PRS 101 / LMG 12228) GN=metZ PE=1 SV=1	1	1	1	1	6.7	6.7	6.7	43.184	403	403	0.0047619	5.7351	1584900	1				44	531	TRUE	535	913	1657	1657
sp|P57112|STHA_PSEAE	sp|P57112|STHA_PSEAE	3	3	3	>sp|P57112|STHA_PSEAE Soluble pyridine nucleotide transhydrogenase OS=Pseudomonas aeruginosa (strain ATCC 15692 / PAO1 / 1C / PRS 101 / LMG 12228) GN=sthA PE=1 SV=2	1	3	3	3	7.5	7.5	7.5	51.16	464	464	0	17.67	7148000	4				45	117;356;777	True;True;True	118;359;786	195;601;1385;1386	367;1113;2558;2559	367;1113;2559
sp|P72173|AAT_PSEAE	sp|P72173|AAT_PSEAE	11	11	11	>sp|P72173|AAT_PSEAE Aspartate aminotransferase OS=Pseudomonas aeruginosa (strain ATCC 15692 / PAO1 / 1C / PRS 101 / LMG 12228) GN=aspC PE=3 SV=2	1	11	11	11	42.5	42.5	42.5	43.319	398	398	0	87.572	74028000	19				46	48;77;184;351;379;573;579;889;939;1026;1086	True;True;True;True;True;True;True;True;True;True;True	48;78;186;354;383;577;583;899;949;1036;1096	79;80;131;132;313;593;635;1018;1019;1027;1593;1675;1676;1827;1828;1933;1934	162;163;255;256;626;1102;1169;1874;1875;1883;2990;3122;3123;3391;3392;3393;3666;3667;3668;3669	162;255;626;1102;1169;1875;1883;2990;3123;3392;3666
sp|P77915|HEMN_PSEAE	sp|P77915|HEMN_PSEAE	5	5	5	>sp|P77915|HEMN_PSEAE Oxygen-independent coproporphyrinogen-III oxidase OS=Pseudomonas aeruginosa (strain ATCC 15692 / PAO1 / 1C / PRS 101 / LMG 12228) GN=hemN PE=2 SV=2	1	5	5	5	15.9	15.9	15.9	52.488	460	460	0	39.621	15423000	6				47	615;812;904;1007;1082	True;True;True;True;True	619;821;914;1017;1092	1087;1445;1446;1615;1796;1927	1986;2650;2651;3026;3345;3639	1986;2651;3026;3345;3639
sp|Q51342|PUR1_PSEAE	sp|Q51342|PUR1_PSEAE	4	4	4	>sp|Q51342|PUR1_PSEAE Amidophosphoribosyltransferase OS=Pseudomonas aeruginosa (strain ATCC 15692 / PAO1 / 1C / PRS 101 / LMG 12228) GN=purF PE=3 SV=3	1	4	4	4	11.2	11.2	11.2	55.369	501	501	0	32.686	24747000	8				48	231;389;824;848	True;True;True;True	233;393;833;858	392;651;652;1463;1464;1517	763;1206;1207;1208;2673;2674;2675;2817	763;1207;2673;2817
sp|Q51422|SYDND_PSEAE	sp|Q51422|SYDND_PSEAE	5	5	5	>sp|Q51422|SYDND_PSEAE Aspartate--tRNA(Asp/Asn) ligase OS=Pseudomonas aeruginosa (strain ATCC 15692 / PAO1 / 1C / PRS 101 / LMG 12228) GN=aspS PE=1 SV=2	1	5	5	5	12.2	12.2	12.2	66.207	591	591	0	55.395	27564000	10				49	149;276;453;899;941	True;True;True;True;True	150;278;457;909;951	247;248;464;775;776;1608;1609;1678	447;448;884;1435;1436;1437;3017;3018;3019;3125	448;884;1437;3018;3125
sp|Q51561|RPOB_PSEAE	sp|Q51561|RPOB_PSEAE	36	36	36	>sp|Q51561|RPOB_PSEAE DNA-directed RNA polymerase subunit beta OS=Pseudomonas aeruginosa (strain ATCC 15692 / PAO1 / 1C / PRS 101 / LMG 12228) GN=rpoB PE=3 SV=2	1	36	36	36	39.9	39.9	39.9	150.84	1357	1357	0	279.18	419640000	97				50	16;58;81;110;164;188;196;210;215;217;319;329;340;365;374;376;399;474;495;545;599;609;612;651;656;677;680;766;835;840;859;869;918;1002;1052;1059	True;True;True;True;True;True;True;True;True;True;True;True;True;True;True;True;True;True;True;True;True;True;True;True;True;True;True;True;True;True;True;True;True;True;True;True	16;58;82;111;165;190;198;212;217;219;322;332;343;369;378;380;403;478;499;549;603;613;616;656;661;682;685;775;845;850;869;879;928;1012;1062;1069	27;95;96;137;138;184;185;274;319;332;333;357;364;365;368;535;536;552;553;576;612;627;628;631;666;667;806;807;857;858;941;1060;1061;1075;1076;1081;1082;1154;1155;1163;1164;1201;1204;1205;1368;1369;1481;1482;1503;1504;1542;1543;1561;1562;1635;1787;1788;1870;1871;1887	60;194;195;196;197;261;262;263;264;265;266;267;268;269;347;348;349;350;351;506;637;656;657;658;659;701;711;712;715;716;990;991;992;993;1018;1019;1020;1074;1075;1134;1160;1161;1164;1165;1226;1227;1228;1483;1484;1583;1584;1585;1586;1727;1939;1940;1941;1960;1961;1969;1970;1971;2132;2133;2134;2135;2136;2145;2146;2200;2204;2205;2533;2534;2535;2536;2537;2720;2721;2722;2723;2724;2725;2790;2791;2792;2872…	60;196;261;350;506;637;656;701;712;715;992;1020;1074;1134;1161;1164;1227;1484;1585;1727;1940;1961;1970;2132;2145;2200;2205;2533;2722;2792;2874;2946;3065;3334;3448;3586
sp|Q51567|SUCD_PSEAE	sp|Q51567|SUCD_PSEAE	5	5	5	>sp|Q51567|SUCD_PSEAE Succinyl-CoA ligase [ADP-forming] subunit alpha OS=Pseudomonas aeruginosa (strain ATCC 15692 / PAO1 / 1C / PRS 101 / LMG 12228) GN=sucD PE=3 SV=2	1	5	5	5	24.7	24.7	24.7	30.266	295	295	0	35.423	42098000	14				51	70;187;264;534;806	True;True;True;True;True	71;189;266;538;815	119;120;318;444;445;918;1436;1437	240;241;636;854;855;856;857;858;1666;1667;1668;2638;2639;2640	240;636;857;1666;2639
sp|Q59637|ODP1_PSEAE	sp|Q59637|ODP1_PSEAE	19	19	19	>sp|Q59637|ODP1_PSEAE Pyruvate dehydrogenase E1 component OS=Pseudomonas aeruginosa (strain ATCC 15692 / PAO1 / 1C / PRS 101 / LMG 12228) GN=aceE PE=3 SV=2	1	19	19	19	22.9	22.9	22.9	99.563	882	882	0	136.5	203960000	49				52	174;189;228;298;390;428;457;476;602;642;654;682;706;707;807;820;864;972;1041	True;True;True;True;True;True;True;True;True;True;True;True;True;True;True;True;True;True;True	175;191;230;301;394;432;461;480;606;646;659;687;713;714;816;829;874;982;1051	287;288;320;321;386;387;505;506;653;717;718;781;782;810;811;1066;1133;1134;1159;1160;1207;1208;1269;1270;1271;1438;1439;1458;1459;1551;1552;1732;1733;1853	530;531;532;533;638;639;747;748;749;750;953;954;955;956;1209;1303;1304;1305;1306;1442;1443;1444;1445;1446;1447;1488;1489;1948;1949;2072;2073;2140;2141;2142;2207;2208;2209;2354;2355;2356;2357;2641;2642;2643;2667;2668;2886;2887;3221;3222;3427	532;639;747;955;1209;1303;1444;1489;1949;2072;2142;2209;2354;2357;2643;2667;2887;3222;3427
sp|Q59638|ODP2_PSEAE	sp|Q59638|ODP2_PSEAE	9	9	9	>sp|Q59638|ODP2_PSEAE Dihydrolipoyllysine-residue acetyltransferase component of pyruvate dehydrogenase complex OS=Pseudomonas aeruginosa (strain ATCC 15692 / PAO1 / 1C / PRS 101 / LMG 12228) GN=aceF PE=2 SV=2	1	9	9	9	18.8	18.8	18.8	56.708	547	547	0	64.717	41096000	13				53	21;134;245;275;441;544;587;624;817	True;True;True;True;True;True;True;True;True	21;135;247;277;445;548;591;628;826	37;220;412;413;462;463;740;939;940;1042;1102;1454;1455	84;405;795;796;882;883;1340;1725;1726;1915;2011;2662;2663	84;405;795;883;1340;1726;1915;2011;2663
sp|Q59653|PYRB_PSEAE	sp|Q59653|PYRB_PSEAE	1	1	1	>sp|Q59653|PYRB_PSEAE Aspartate carbamoyltransferase OS=Pseudomonas aeruginosa (strain ATCC 15692 / PAO1 / 1C / PRS 101 / LMG 12228) GN=pyrB PE=3 SV=2	1	1	1	1	5.7	5.7	5.7	36.629	334	334	0	19.358	1030800	1				54	243	TRUE	245	410	793	793
sp|Q9HT16|ATPF_PSEAE	sp|Q9HT16|ATPF_PSEAE	1	1	1	>sp|Q9HT16|ATPF_PSEAE ATP synthase subunit b OS=Pseudomonas aeruginosa (strain ATCC 15692 / PAO1 / 1C / PRS 101 / LMG 12228) GN=atpF PE=3 SV=1	1	1	1	1	7.1	7.1	7.1	16.956	156	156	0	6.6253	1498400	1				55	115	TRUE	116	193	365	365
sp|Q9HT18|ATPA_PSEAE	sp|Q9HT18|ATPA_PSEAE	12	12	12	>sp|Q9HT18|ATPA_PSEAE ATP synthase subunit alpha OS=Pseudomonas aeruginosa (strain ATCC 15692 / PAO1 / 1C / PRS 101 / LMG 12228) GN=atpA PE=3 SV=1	1	12	12	12	27.8	27.8	27.8	55.393	514	514	0	95.071	149220000	35				56	208;232;308;322;436;708;839;852;926;950;1014;1015	True;True;True;True;True;True;True;True;True;True;True;True	210;234;311;325;440;715;849;862;936;960;1024;1025	352;353;393;520;521;540;541;732;733;1272;1273;1500;1501;1502;1527;1528;1648;1649;1695;1696;1807;1808;1809	690;691;692;764;973;974;998;999;1000;1330;1331;2358;2359;2785;2786;2787;2788;2789;2853;2854;2855;3089;3090;3091;3154;3155;3156;3157;3158;3159;3357;3358;3359;3360;3361;3362	692;764;973;998;1331;2359;2787;2853;3090;3157;3357;3361
sp|Q9HT19|ATPG_PSEAE	sp|Q9HT19|ATPG_PSEAE	1	1	1	>sp|Q9HT19|ATPG_PSEAE ATP synthase gamma chain OS=Pseudomonas aeruginosa (strain ATCC 15692 / PAO1 / 1C / PRS 101 / LMG 12228) GN=atpG PE=3 SV=1	1	1	1	1	6.6	6.6	6.6	31.553	286	286	0	8.401	7537800	2				57	705	TRUE	712	1267;1268	2352;2353	2353
sp|Q9HT20|ATPB_PSEAE	sp|Q9HT20|ATPB_PSEAE	9	9	9	>sp|Q9HT20|ATPB_PSEAE ATP synthase subunit beta OS=Pseudomonas aeruginosa (strain ATCC 15692 / PAO1 / 1C / PRS 101 / LMG 12228) GN=atpD PE=3 SV=1	1	9	9	9	29.9	29.9	29.9	49.499	458	458	0	93.302	55840000	15				58	172;191;203;285;756;924;925;945;1081	True;True;True;True;True;True;True;True;True	173;193;205;287;763;934;935;955;1091	285;324;346;478;1349;1644;1645;1646;1647;1685;1686;1925;1926	528;642;681;906;2497;3082;3083;3084;3085;3086;3087;3088;3141;3142;3637;3638	528;642;681;906;2497;3082;3087;3141;3637
sp|Q9HT95|ATSE4_PSEAE	sp|Q9HT95|ATSE4_PSEAE	2	2	2	>sp|Q9HT95|ATSE4_PSEAE Acetyltransferase PA5475 OS=Pseudomonas aeruginosa (strain ATCC 15692 / PAO1 / 1C / PRS 101 / LMG 12228) GN=PA5475 PE=3 SV=1	1	2	2	2	11.8	11.8	11.8	21	186	186	0	16.2	4016100	3				59	183;761	True;True	185;768	312;1357;1358	625;2509;2510	625;2510
sp|Q9HTD7|ASPA_PSEAE	sp|Q9HTD7|ASPA_PSEAE	2	2	2	>sp|Q9HTD7|ASPA_PSEAE Aspartate ammonia-lyase OS=Pseudomonas aeruginosa (strain ATCC 15692 / PAO1 / 1C / PRS 101 / LMG 12228) GN=aspA PE=3 SV=1	1	2	2	2	12.2	12.2	12.2	51.069	474	474	0	11.637	4317600	5				60	493;553	True;True	497;557	853;854;963	1578;1579;1580;1770;1771	1579;1770
sp|Q9HTF1|LTAE_PSEAE	sp|Q9HTF1|LTAE_PSEAE	2	2	2	>sp|Q9HTF1|LTAE_PSEAE Low specificity L-threonine aldolase OS=Pseudomonas aeruginosa (strain ATCC 15692 / PAO1 / 1C / PRS 101 / LMG 12228) GN=ltaE PE=3 SV=1	1	2	2	2	10.7	10.7	10.7	38.213	346	346	0	20.639	9620900	5				61	280;1025	True;True	282;1035	469;470;1826	890;891;892;3389;3390	890;3389
sp|Q9HTN8|RL28_PSEAE	sp|Q9HTN8|RL28_PSEAE	1	1	1	>sp|Q9HTN8|RL28_PSEAE 50S ribosomal protein L28 OS=Pseudomonas aeruginosa (strain ATCC 15692 / PAO1 / 1C / PRS 101 / LMG 12228) GN=rpmB PE=3 SV=1	1	1	1	1	12.8	12.8	12.8	9.0655	78	78	0	7.2169	10499000	2				62	336	TRUE	339	566;567	1045;1046	1046
sp|Q9HTQ0|DADA1_PSEAE	sp|Q9HTQ0|DADA1_PSEAE	7	7	7	>sp|Q9HTQ0|DADA1_PSEAE D-amino acid dehydrogenase 1 OS=Pseudomonas aeruginosa (strain ATCC 15692 / PAO1 / 1C / PRS 101 / LMG 12228) GN=dadA1 PE=1 SV=1	1	7	7	7	20.6	20.6	20.6	47.139	432	432	0	60.421	46053000	15				63	32;623;808;879;896;978;1073	True;True;True;True;True;True;True	32;627;817;889;906;988;1083	54;55;1100;1101;1440;1441;1575;1576;1603;1743;1744;1912	105;106;2008;2009;2010;2644;2645;2962;2963;3007;3008;3233;3234;3235;3618	105;2010;2645;2962;3008;3234;3618
sp|Q9HTV1|RHO_PSEAE	sp|Q9HTV1|RHO_PSEAE	3	3	3	>sp|Q9HTV1|RHO_PSEAE Transcription termination factor Rho OS=Pseudomonas aeruginosa (strain ATCC 15692 / PAO1 / 1C / PRS 101 / LMG 12228) GN=rho PE=3 SV=1	1	3	3	3	9.8	9.8	9.8	47.069	419	419	0	29.234	19151000	5				64	437;657;873	True;True;True	441;662;883	734;735;1165;1166;1567;1568	1332;1333;1334;2147;2148;2952;2953	1334;2148;2952
sp|Q9HU21|RMLC_PSEAE	sp|Q9HU21|RMLC_PSEAE	1	1	1	>sp|Q9HU21|RMLC_PSEAE dTDP-4-dehydrorhamnose 3,5-epimerase OS=Pseudomonas aeruginosa (strain ATCC 15692 / PAO1 / 1C / PRS 101 / LMG 12228) GN=rmlC PE=1 SV=1	1	1	1	1	6.6	6.6	6.6	20.766	181	181	0	6.6862	2862700	1				65	500	TRUE	504	865	1598	1598
sp|Q9HU65|GLNA_PSEAE	sp|Q9HU65|GLNA_PSEAE	9	9	9	>sp|Q9HU65|GLNA_PSEAE Glutamine synthetase OS=Pseudomonas aeruginosa (strain ATCC 15692 / PAO1 / 1C / PRS 101 / LMG 12228) GN=glnA PE=1 SV=1	1	9	9	9	28.8	28.8	28.8	51.944	469	469	0	96.087	100440000	52				66	89;90;154;292;456;637;659;734;834	True;True;True;True;True;True;True;True;True	90;91;155;294;295;460;641;664;741;844	148;149;150;151;255;256;490;491;492;493;494;495;496;780;1124;1125;1168;1169;1312;1313;1314;1315;1479;1480	286;287;288;289;290;455;456;923;924;925;926;927;928;929;930;931;932;933;934;935;936;937;938;939;940;941;942;943;1441;2057;2058;2059;2060;2061;2151;2152;2420;2421;2422;2423;2424;2425;2426;2427;2428;2429;2430;2431;2432;2717;2718;2719	287;288;455;929;1441;2059;2152;2420;2718	7	377
sp|Q9HUA6|OPGH_PSEAE	sp|Q9HUA6|OPGH_PSEAE	1	1	1	>sp|Q9HUA6|OPGH_PSEAE Glucans biosynthesis glucosyltransferase H OS=Pseudomonas aeruginosa (strain ATCC 15692 / PAO1 / 1C / PRS 101 / LMG 12228) GN=opgH PE=3 SV=1	1	1	1	1	1.9	1.9	1.9	96.994	861	861	0	6.3714	261690	1				67	458	TRUE	462	783	1448	1448
sp|Q9HUM0|HFQ_PSEAE	sp|Q9HUM0|HFQ_PSEAE	1	1	1	>sp|Q9HUM0|HFQ_PSEAE RNA-binding protein Hfq OS=Pseudomonas aeruginosa (strain ATCC 15692 / PAO1 / 1C / PRS 101 / LMG 12228) GN=hfq PE=1 SV=1	1	1	1	1	15.9	15.9	15.9	9.1034	82	82	0	6.2726	1569900	2				68	604	TRUE	608	1068;1069	1951;1952	1951
sp|Q9HUM6|PURA_PSEAE	sp|Q9HUM6|PURA_PSEAE	1	1	1	>sp|Q9HUM6|PURA_PSEAE Adenylosuccinate synthetase OS=Pseudomonas aeruginosa (strain ATCC 15692 / PAO1 / 1C / PRS 101 / LMG 12228) GN=purA PE=3 SV=1	1	1	1	1	4.7	4.7	4.7	46.814	430	430	0	6.535	4502200	1				69	951	TRUE	961	1697	3160	3160
sp|Q9HUM9|RS6_PSEAE	sp|Q9HUM9|RS6_PSEAE	1	1	1	>sp|Q9HUM9|RS6_PSEAE 30S ribosomal protein S6 OS=Pseudomonas aeruginosa (strain ATCC 15692 / PAO1 / 1C / PRS 101 / LMG 12228) GN=rpsF PE=3 SV=1	1	1	1	1	7.2	7.2	7.2	16.164	139	139	0	6.439	3262100	1				70	69	TRUE	70	118	239	239
sp|Q9HUU5|URE1_PSEAE	sp|Q9HUU5|URE1_PSEAE	1	1	1	>sp|Q9HUU5|URE1_PSEAE Urease subunit alpha OS=Pseudomonas aeruginosa (strain ATCC 15692 / PAO1 / 1C / PRS 101 / LMG 12228) GN=ureC PE=3 SV=1	1	1	1	1	5.5	5.5	5.5	60.61	566	566	0.0044643	5.501	1588900	1				71	168	TRUE	169	280	514	514
sp|Q9HV43|DNAK_PSEAE	sp|Q9HV43|DNAK_PSEAE	4	4	4	>sp|Q9HV43|DNAK_PSEAE Chaperone protein DnaK OS=Pseudomonas aeruginosa (strain ATCC 15692 / PAO1 / 1C / PRS 101 / LMG 12228) GN=dnaK PE=3 SV=1	1	4	4	4	10	10	10	68.402	637	637	0	32.372	6972600	6				72	129;271;696;907	True;True;True;True	130;273;703;917	210;456;1237;1620	392;876;2281;2282;3040;3041	392;876;2282;3041
sp|Q9HV50|GLMM_PSEAE	sp|Q9HV50|GLMM_PSEAE	2	2	2	>sp|Q9HV50|GLMM_PSEAE Phosphoglucosamine mutase OS=Pseudomonas aeruginosa (strain ATCC 15692 / PAO1 / 1C / PRS 101 / LMG 12228) GN=glmM PE=3 SV=1	1	2	2	2	9.2	9.2	9.2	47.796	445	445	0	13.544	13534000	5				73	606;943	True;True	610;953	1072;1681;1682	1956;1957;3136;3137;3138	1956;3137
sp|Q9HV59|PNP_PSEAE	sp|Q9HV59|PNP_PSEAE	8	8	8	>sp|Q9HV59|PNP_PSEAE Polyribonucleotide nucleotidyltransferase OS=Pseudomonas aeruginosa (strain ATCC 15692 / PAO1 / 1C / PRS 101 / LMG 12228) GN=pnp PE=3 SV=1	1	8	8	8	17.8	17.8	17.8	75.452	701	701	0	69.842	47271000	18				74	27;109;190;445;595;752;786;977	True;True;True;True;True;True;True;True	27;110;192;449;599;759;795;987	47;48;182;183;322;323;746;747;1054;1344;1404;1741;1742	97;98;342;343;344;345;346;640;641;1355;1356;1357;1932;2492;2586;2587;3231;3232	98;346;641;1356;1932;2492;2587;3232
sp|Q9HVA2|ILVC_PSEAE	sp|Q9HVA2|ILVC_PSEAE	3	3	3	>sp|Q9HVA2|ILVC_PSEAE Ketol-acid reductoisomerase OS=Pseudomonas aeruginosa (strain ATCC 15692 / PAO1 / 1C / PRS 101 / LMG 12228) GN=ilvC PE=1 SV=1	1	3	3	3	14.2	14.2	14.2	36.424	338	338	0	24.744	31157000	6				75	17;327;660	True;True;True	17;330;665	28;29;549;550;1170;1171	61;62;1013;1014;1015;1016;2153;2154	61;1015;2153
sp|Q9HVC5|KPRS_PSEAE	sp|Q9HVC5|KPRS_PSEAE	3	3	3	>sp|Q9HVC5|KPRS_PSEAE Ribose-phosphate pyrophosphokinase OS=Pseudomonas aeruginosa (strain ATCC 15692 / PAO1 / 1C / PRS 101 / LMG 12228) GN=prs PE=3 SV=1	1	3	3	3	12.5	12.5	12.5	34.04	313	313	0	21.391	6301900	4				76	464;678;1013	True;True;True	468;683;1023	790;1202;1806	1460;2201;2202;3356	1460;2202;3356
sp|Q9HVF1|MQO2_PSEAE	sp|Q9HVF1|MQO2_PSEAE	2	2	2	>sp|Q9HVF1|MQO2_PSEAE Probable malate:quinone oxidoreductase 2 OS=Pseudomonas aeruginosa (strain ATCC 15692 / PAO1 / 1C / PRS 101 / LMG 12228) GN=mqo2 PE=3 SV=1	1	2	2	2	7.9	7.9	7.9	55.498	507	507	0	17.252	9953900	4				77	119;1074	True;True	120;1084	197;1913;1914	369;3619;3620;3621	369;3620
sp|Q9HVI7|GLYA3_PSEAE	sp|Q9HVI7|GLYA3_PSEAE	1	1	1	>sp|Q9HVI7|GLYA3_PSEAE Serine hydroxymethyltransferase 3 OS=Pseudomonas aeruginosa (strain ATCC 15692 / PAO1 / 1C / PRS 101 / LMG 12228) GN=glyA2 PE=3 SV=1	1	1	1	1	2.2	2.2	2.2	45.157	417	417	0.0046083	5.6199	1502600	1				78	826	TRUE	835	1466	2677	2677
sp|Q9HVM4|SYI_PSEAE	sp|Q9HVM4|SYI_PSEAE	7	7	7	>sp|Q9HVM4|SYI_PSEAE Isoleucine--tRNA ligase OS=Pseudomonas aeruginosa (strain ATCC 15692 / PAO1 / 1C / PRS 101 / LMG 12228) GN=ileS PE=3 SV=1	1	7	7	7	10.5	10.5	10.5	105.46	943	943	0	62.537	45572000	15				79	72;262;310;557;815;886;1038	True;True;True;True;True;True;True	73;264;313;561;824;896;1048	123;438;439;524;525;969;970;1450;1451;1585;1586;1847;1848	245;835;836;978;979;1779;1780;2657;2658;2659;2973;2974;3420;3421;3422	245;835;979;1780;2658;2974;3422
sp|Q9HVN5|CLPB_PSEAE	sp|Q9HVN5|CLPB_PSEAE	3	1	1	>sp|Q9HVN5|CLPB_PSEAE Chaperone protein ClpB OS=Pseudomonas aeruginosa (strain ATCC 15692 / PAO1 / 1C / PRS 101 / LMG 12228) GN=clpB PE=3 SV=1	1	3	1	1	4.1	1.4	1.4	95.004	854	854	0	8.1608	106220	1				80	34;728;851	True;False;False	34;735;861	58;1304;1525;1526	113;2406;2849;2850;2851;2852	113;2406;2851
sp|Q9HVW7|MURA_PSEAE	sp|Q9HVW7|MURA_PSEAE	1	1	1	>sp|Q9HVW7|MURA_PSEAE UDP-N-acetylglucosamine 1-carboxyvinyltransferase OS=Pseudomonas aeruginosa (strain ATCC 15692 / PAO1 / 1C / PRS 101 / LMG 12228) GN=murA PE=1 SV=1	1	1	1	1	4.8	4.8	4.8	44.645	421	421	0.0046296	5.6215	613880	0				81	122	TRUE	123	200	376	376
sp|Q9HVX6|SYW_PSEAE	sp|Q9HVX6|SYW_PSEAE	1	1	1	>sp|Q9HVX6|SYW_PSEAE Tryptophan--tRNA ligase OS=Pseudomonas aeruginosa (strain ATCC 15692 / PAO1 / 1C / PRS 101 / LMG 12228) GN=trpS PE=3 SV=1	1	1	1	1	2.9	2.9	2.9	48.961	448	448	0	8.1409	5966700	2				82	570	TRUE	574	1013;1014	1869;1870	1869
sp|Q9HW02|MURC_PSEAE	sp|Q9HW02|MURC_PSEAE	1	1	1	>sp|Q9HW02|MURC_PSEAE UDP-N-acetylmuramate--L-alanine ligase OS=Pseudomonas aeruginosa (strain ATCC 15692 / PAO1 / 1C / PRS 101 / LMG 12228) GN=murC PE=3 SV=1	1	1	1	1	2.9	2.9	2.9	51.981	480	480	0	13.773	2231300	2				83	590	TRUE	594	1046;1047	1920;1921	1920
sp|Q9HWC9|RPOC_PSEAE	sp|Q9HWC9|RPOC_PSEAE	31	31	31	>sp|Q9HWC9|RPOC_PSEAE DNA-directed RNA polymerase subunit beta OS=Pseudomonas aeruginosa (strain ATCC 15692 / PAO1 / 1C / PRS 101 / LMG 12228) GN=rpoC PE=3 SV=1	1	31	31	31	33.7	33.7	33.7	154.38	1399	1399	0	277.93	383290000	99				84	14;84;88;128;175;221;226;246;267;315;320;348;418;427;434;551;565;571;605;634;652;663;665;673;731;801;843;920;954;985;1071	True;True;True;True;True;True;True;True;True;True;True;True;True;True;True;True;True;True;True;True;True;True;True;True;True;True;True;True;True;True;True	14;85;89;129;176;223;228;248;269;318;323;351;422;431;438;555;569;575;609;638;657;668;670;678;738;810;853;930;964;995;1081	24;25;141;142;146;147;209;289;290;291;292;374;375;382;383;414;415;450;451;530;537;588;589;701;702;715;716;729;730;960;961;1003;1015;1016;1070;1071;1118;1119;1156;1157;1176;1177;1180;1193;1194;1308;1309;1428;1508;1509;1638;1639;1702;1756;1757;1907;1908	55;56;272;273;274;275;276;281;282;283;284;285;390;391;534;535;536;537;538;539;540;541;542;543;544;728;729;730;731;732;740;741;742;743;797;798;799;800;801;802;870;871;985;994;1095;1096;1097;1284;1285;1286;1300;1301;1302;1325;1326;1327;1763;1764;1765;1766;1767;1850;1851;1871;1872;1953;1954;1955;2050;2051;2052;2137;2138;2161;2162;2163;2174;2175;2190;2191;2413;2414;2415;2416;2417;2628;2796;2797;3068;…	56;272;283;391;534;730;741;801;871;985;994;1097;1284;1301;1327;1764;1851;1871;1954;2052;2137;2161;2174;2191;2417;2628;2796;3071;3170;3251;3613
sp|Q9HWD2|EFG1_PSEAE;sp|Q9I244|EFG2_PSEAE	sp|Q9HWD2|EFG1_PSEAE	20;6	20;6	20;6	>sp|Q9HWD2|EFG1_PSEAE Elongation factor G 1 OS=Pseudomonas aeruginosa (strain ATCC 15692 / PAO1 / 1C / PRS 101 / LMG 12228) GN=fusA PE=1 SV=1	2	20	20	20	42.1	42.1	42.1	77.784	706	706;702	0	191.72	272930000	54				85	33;40;130;137;212;218;259;339;347;372;373;397;505;550;655;715;932;968;1033;1048	True;True;True;True;True;True;True;True;True;True;True;True;True;True;True;True;True;True;True;True	33;40;131;138;214;220;261;342;350;376;377;401;509;554;660;722;942;978;1043;1058	56;57;66;67;211;212;225;226;360;369;370;435;574;575;586;587;623;624;625;626;663;664;872;873;958;959;1161;1162;1282;1283;1662;1663;1726;1838;1839;1864;1865	107;108;109;110;111;112;128;129;393;394;414;415;416;417;705;717;718;832;1072;1073;1093;1094;1151;1152;1153;1154;1155;1156;1157;1158;1159;1220;1221;1222;1223;1224;1605;1606;1607;1608;1761;1762;2143;2144;2372;2373;3108;3109;3211;3409;3410;3411;3412;3440;3441;3442	110;129;394;415;705;717;832;1073;1093;1154;1156;1223;1608;1762;2143;2372;3109;3211;3409;3442
sp|Q9HWD5|RL3_PSEAE	sp|Q9HWD5|RL3_PSEAE	2	2	2	>sp|Q9HWD5|RL3_PSEAE 50S ribosomal protein L3 OS=Pseudomonas aeruginosa (strain ATCC 15692 / PAO1 / 1C / PRS 101 / LMG 12228) GN=rplC PE=3 SV=1	1	2	2	2	13.3	13.3	13.3	22.591	211	211	0	12.26	8830500	2				86	307;1012	True;True	310;1022	519;1805	972;3355	972;3355
sp|Q9HWD8|RL2_PSEAE	sp|Q9HWD8|RL2_PSEAE	4	4	4	>sp|Q9HWD8|RL2_PSEAE 50S ribosomal protein L2 OS=Pseudomonas aeruginosa (strain ATCC 15692 / PAO1 / 1C / PRS 101 / LMG 12228) GN=rplB PE=3 SV=1	1	4	4	4	21.6	21.6	21.6	29.579	273	273	0	37.162	42991000	13				87	133;367;368;779	True;True;True;True	134;371;372;788	216;217;218;219;615;616;617;618;1391;1392	400;401;402;403;404;1141;1142;1143;1144;1145;1146;2569;2570	403;1141;1145;2570
sp|Q9HWE1|RS3_PSEAE	sp|Q9HWE1|RS3_PSEAE	3	3	3	>sp|Q9HWE1|RS3_PSEAE 30S ribosomal protein S3 OS=Pseudomonas aeruginosa (strain ATCC 15692 / PAO1 / 1C / PRS 101 / LMG 12228) GN=rpsC PE=3 SV=1	1	3	3	3	19.3	19.3	19.3	25.838	228	228	0	18.435	6782400	2				88	488;737;760	True;True;True	492;744;767	846;1319;1356	1560;2442;2508	1560;2442;2508
sp|Q9HWE2|RL16_PSEAE	sp|Q9HWE2|RL16_PSEAE	2	2	2	>sp|Q9HWE2|RL16_PSEAE 50S ribosomal protein L16 OS=Pseudomonas aeruginosa (strain ATCC 15692 / PAO1 / 1C / PRS 101 / LMG 12228) GN=rplP PE=3 SV=1	1	2	2	2	16.8	16.8	16.8	15.401	137	137	0	16.674	22897000	7				89	980;1005	True;True	990;1015	1747;1748;1792;1793	3238;3239;3240;3339;3340;3341;3342	3240;3342
sp|Q9HWE5|RL14_PSEAE	sp|Q9HWE5|RL14_PSEAE	3	3	3	>sp|Q9HWE5|RL14_PSEAE 50S ribosomal protein L14 OS=Pseudomonas aeruginosa (strain ATCC 15692 / PAO1 / 1C / PRS 101 / LMG 12228) GN=rplN PE=3 SV=1	1	3	3	3	31.1	31.1	31.1	13.412	122	122	0	39.749	32809000	6				90	268;669;1049	True;True;True	270;674;1059	452;453;1186;1187;1866;1867	872;873;2182;2183;3443;3444	872;2183;3443
sp|Q9HWF2|RS5_PSEAE	sp|Q9HWF2|RS5_PSEAE	4	4	4	>sp|Q9HWF2|RS5_PSEAE 30S ribosomal protein S5 OS=Pseudomonas aeruginosa (strain ATCC 15692 / PAO1 / 1C / PRS 101 / LMG 12228) GN=rpsE PE=3 SV=1	1	4	4	4	34.9	34.9	34.9	17.625	166	166	0	46.141	42526000	9				91	142;409;725;1031	True;True;True;True	143;413;732;1041	235;236;687;688;1300;1835;1836	434;435;1266;1267;2401;3404;3405;3406;3407	435;1266;2401;3405
sp|Q9HWF7|RS13_PSEAE	sp|Q9HWF7|RS13_PSEAE	1	1	1	>sp|Q9HWF7|RS13_PSEAE 30S ribosomal protein S13 OS=Pseudomonas aeruginosa (strain ATCC 15692 / PAO1 / 1C / PRS 101 / LMG 12228) GN=rpsM PE=3 SV=1	1	1	1	1	11	11	11	13.265	118	118	0	6.5791	8721700	3				92	432	TRUE	436	725;726	1320;1321;1322	1322
sp|Q9HWF8|RS11_PSEAE	sp|Q9HWF8|RS11_PSEAE	1	1	1	>sp|Q9HWF8|RS11_PSEAE 30S ribosomal protein S11 OS=Pseudomonas aeruginosa (strain ATCC 15692 / PAO1 / 1C / PRS 101 / LMG 12228) GN=rpsK PE=3 SV=1	1	1	1	1	8.5	8.5	8.5	13.629	129	129	0	6.5945	4805800	2				93	51	TRUE	51	84	170;171	170
sp|Q9HWG0|UVRA_PSEAE	sp|Q9HWG0|UVRA_PSEAE	1	1	1	>sp|Q9HWG0|UVRA_PSEAE UvrABC system protein A OS=Pseudomonas aeruginosa (strain ATCC 15692 / PAO1 / 1C / PRS 101 / LMG 12228) GN=uvrA PE=3 SV=1	1	1	1	1	1.6	1.6	1.6	104.49	945	945	0	11.171	1928700	3				94	554	TRUE	558	964;965	1772;1773;1774	1773
sp|Q9HX33|SYL_PSEAE	sp|Q9HX33|SYL_PSEAE	1	1	1	>sp|Q9HX33|SYL_PSEAE Leucine--tRNA ligase OS=Pseudomonas aeruginosa (strain ATCC 15692 / PAO1 / 1C / PRS 101 / LMG 12228) GN=leuS PE=3 SV=1	1	1	1	1	1.9	1.9	1.9	97.647	873	873	0	18.444	2456900	3				95	291	TRUE	293	487;488;489	920;921;922	920
sp|Q9HXH0|SYV_PSEAE	sp|Q9HXH0|SYV_PSEAE	1	1	1	>sp|Q9HXH0|SYV_PSEAE Valine--tRNA ligase OS=Pseudomonas aeruginosa (strain ATCC 15692 / PAO1 / 1C / PRS 101 / LMG 12228) GN=valS PE=1 SV=1	1	1	1	1	1.5	1.5	1.5	107.71	950	950	0.0083333	5.3759	4946100	1				96	1029	TRUE	1039	1832	3401	3401
sp|Q9HXI1|SECD_PSEAE	sp|Q9HXI1|SECD_PSEAE	1	1	1	>sp|Q9HXI1|SECD_PSEAE Protein translocase subunit SecD OS=Pseudomonas aeruginosa (strain ATCC 15692 / PAO1 / 1C / PRS 101 / LMG 12228) GN=secD PE=3 SV=1	1	1	1	1	2.9	2.9	2.9	67.674	620	620	0.0047393	5.7182	1591000	0				97	466	TRUE	470	793	1464	1464
sp|Q9HXJ4|ISPG_PSEAE	sp|Q9HXJ4|ISPG_PSEAE	3	3	3	>sp|Q9HXJ4|ISPG_PSEAE 4-hydroxy-3-methylbut-2-en-1-yl diphosphate synthase (flavodoxin) OS=Pseudomonas aeruginosa (strain ATCC 15692 / PAO1 / 1C / PRS 101 / LMG 12228) GN=ispG PE=3 SV=1	1	3	3	3	10.8	10.8	10.8	40.056	371	371	0	20.57	8744300	3				98	123;521;783	True;True;True	124;525;792	201;899;1399;1400	377;1641;2578;2579	377;1641;2579
sp|Q9HXN2|PUR4_PSEAE	sp|Q9HXN2|PUR4_PSEAE	3	3	3	>sp|Q9HXN2|PUR4_PSEAE Phosphoribosylformylglycinamidine synthase OS=Pseudomonas aeruginosa (strain ATCC 15692 / PAO1 / 1C / PRS 101 / LMG 12228) GN=purL PE=3 SV=1	1	3	3	3	2.9	2.9	2.9	140.65	1298	1298	0	22.081	4613400	4				99	477;1009;1063	True;True;True	481;1019;1073	812;1799;1800;1896	1490;3348;3349;3600	1490;3348;3600
sp|Q9HXZ1|DPO3A_PSEAE	sp|Q9HXZ1|DPO3A_PSEAE	1	1	1	>sp|Q9HXZ1|DPO3A_PSEAE DNA polymerase III subunit alpha OS=Pseudomonas aeruginosa (strain ATCC 15692 / PAO1 / 1C / PRS 101 / LMG 12228) GN=dnaE PE=3 SV=1	1	1	1	1	1.6	1.6	1.6	130.9	1173	1173	0	6.5621	1475200	1				100	143	TRUE	144	237	436	436
sp|Q9HXZ2|ACCA_PSEAE	sp|Q9HXZ2|ACCA_PSEAE	2	2	2	>sp|Q9HXZ2|ACCA_PSEAE Acetyl-coenzyme A carboxylase carboxyl transferase subunit alpha OS=Pseudomonas aeruginosa (strain ATCC 15692 / PAO1 / 1C / PRS 101 / LMG 12228) GN=accA PE=1 SV=1	1	2	2	2	12	12	12	34.947	316	316	0	15.91	8153600	3				101	631;773	True;True	635;782	1112;1113;1379	2044;2045;2551	2045;2551
sp|Q9HXZ4|PYRG_PSEAE	sp|Q9HXZ4|PYRG_PSEAE	11	11	11	>sp|Q9HXZ4|PYRG_PSEAE CTP synthase OS=Pseudomonas aeruginosa (strain ATCC 15692 / PAO1 / 1C / PRS 101 / LMG 12228) GN=pyrG PE=3 SV=1	1	11	11	11	29	29	29	59.617	542	542	0	78.792	65826000	14				102	332;395;454;462;816;858;906;1058;1066;1067;1077	True;True;True;True;True;True;True;True;True;True;True	335;399;458;466;825;868;916;1068;1076;1077;1087	557;558;660;661;777;778;787;1452;1453;1540;1541;1618;1619;1885;1886;1901;1902;1919	1027;1028;1216;1217;1218;1438;1439;1452;2660;2661;2870;2871;3038;3039;3584;3585;3606;3607;3630	1028;1217;1439;1452;2660;2870;3038;3584;3606;3607;3630
sp|Q9HXZ5|ENO_PSEAE	sp|Q9HXZ5|ENO_PSEAE	2	2	2	>sp|Q9HXZ5|ENO_PSEAE Enolase OS=Pseudomonas aeruginosa (strain ATCC 15692 / PAO1 / 1C / PRS 101 / LMG 12228) GN=eno PE=3 SV=1	1	2	2	2	7.5	7.5	7.5	45.195	429	429	0	20.948	6723900	2				103	290;994	True;True	292;1004	486;1774	919;3298	919;3298
sp|Q9HYC7|SYM_PSEAE	sp|Q9HYC7|SYM_PSEAE	2	2	2	>sp|Q9HYC7|SYM_PSEAE Methionine--tRNA ligase OS=Pseudomonas aeruginosa (strain ATCC 15692 / PAO1 / 1C / PRS 101 / LMG 12228) GN=metG PE=3 SV=1	1	2	2	2	5.2	5.2	5.2	74.903	677	677	0	15.613	5952400	2				104	105;353	True;True	106;356	174;596	329;1106	329;1106
sp|Q9HYD5|MAO1_PSEAE	sp|Q9HYD5|MAO1_PSEAE	1	1	1	>sp|Q9HYD5|MAO1_PSEAE NAD-dependent malic enzyme OS=Pseudomonas aeruginosa (strain ATCC 15692 / PAO1 / 1C / PRS 101 / LMG 12228) GN=maeA PE=3 SV=1	1	1	1	1	3.2	3.2	3.2	62.42	564	564	0	10.84	1950600	2				105	1006	TRUE	1016	1794;1795	3343;3344	3343
sp|Q9HYL2|NOSZ_PSEAE	sp|Q9HYL2|NOSZ_PSEAE	1	1	1	>sp|Q9HYL2|NOSZ_PSEAE Nitrous-oxide reductase OS=Pseudomonas aeruginosa (strain ATCC 15692 / PAO1 / 1C / PRS 101 / LMG 12228) GN=nosZ PE=3 SV=1	1	1	1	1	3.1	3.1	3.1	70.659	636	636	0.0044843	5.5109	2347800	1				106	455	TRUE	459	779	1440	1440
sp|Q9HYR2|FABH_PSEAE	sp|Q9HYR2|FABH_PSEAE	2	2	2	>sp|Q9HYR2|FABH_PSEAE 3-oxoacyl-[acyl-carrier-protein] synthase 3 OS=Pseudomonas aeruginosa (strain ATCC 15692 / PAO1 / 1C / PRS 101 / LMG 12228) GN=fabH PE=1 SV=1	1	2	2	2	11.5	11.5	11.5	34.003	330	330	0	15.191	10119000	3				107	6;1024	True;True	6;1034	10;1824;1825	19;3387;3388	19;3388
sp|Q9HZ71|RS1_PSEAE	sp|Q9HZ71|RS1_PSEAE	7	7	7	>sp|Q9HZ71|RS1_PSEAE 30S ribosomal protein S1 OS=Pseudomonas aeruginosa (strain ATCC 15692 / PAO1 / 1C / PRS 101 / LMG 12228) GN=rpsA PE=3 SV=1	1	7	7	7	16.5	16.5	16.5	61.869	559	559	0	54.717	57808000	12				108	38;202;306;325;757;759;844	True;True;True;True;True;True;True	38;204;309;328;764;766;854	64;344;345;517;518;545;546;1350;1351;1354;1355;1510	126;679;680;969;970;971;1005;1006;2498;2499;2506;2507;2798	126;680;971;1006;2498;2507;2798
sp|Q9HZ76|WBPE_PSEAE	sp|Q9HZ76|WBPE_PSEAE	4	4	4	>sp|Q9HZ76|WBPE_PSEAE UDP-2-acetamido-2-deoxy-3-oxo-D-glucuronate aminotransferase OS=Pseudomonas aeruginosa (strain ATCC 15692 / PAO1 / 1C / PRS 101 / LMG 12228) GN=wbpE PE=1 SV=1	1	4	4	4	15.9	15.9	15.9	38.924	359	359	0	39.096	46287000	12				109	431;519;917;1060	True;True;True;True	435;523;927;1070	724;895;896;1633;1634;1888;1889	1319;1636;1637;3061;3062;3063;3064;3587;3588;3589;3590;3591	1319;1637;3064;3588
sp|Q9HZA7|ACCD_PSEAE	sp|Q9HZA7|ACCD_PSEAE	1	1	1	>sp|Q9HZA7|ACCD_PSEAE Acetyl-coenzyme A carboxylase carboxyl transferase subunit beta OS=Pseudomonas aeruginosa (strain ATCC 15692 / PAO1 / 1C / PRS 101 / LMG 12228) GN=accD PE=1 SV=1	1	1	1	1	4.5	4.5	4.5	31.843	290	290	0	8.2798	2619800	1				110	686	TRUE	691	1213	2214	2214
sp|Q9HZE0|DHE2_PSEAE	sp|Q9HZE0|DHE2_PSEAE	47	47	47	>sp|Q9HZE0|DHE2_PSEAE NAD-specific glutamate dehydrogenase OS=Pseudomonas aeruginosa (strain ATCC 15692 / PAO1 / 1C / PRS 101 / LMG 12228) GN=gdhB PE=1 SV=1	1	47	47	47	39.4	39.4	39.4	182.64	1620	1620	0	323.31	537100000	145				111	7;13;65;68;75;93;94;114;159;181;199;219;230;235;244;255;269;288;360;363;384;411;504;528;547;566;585;592;635;645;688;690;763;798;809;819;833;863;887;946;953;971;1010;1020;1032;1056;1080	True;True;True;True;True;True;True;True;True;True;True;True;True;True;True;True;True;True;True;True;True;True;True;True;True;True;True;True;True;True;True;True;True;True;True;True;True;True;True;True;True;True;True;True;True;True;True	7;13;66;69;76;94;95;115;160;183;201;221;232;237;246;257;271;290;363;366;388;415;508;532;551;570;589;596;639;649;693;696;770;807;818;828;843;873;897;956;963;981;1020;1030;1042;1066;1090	11;12;23;110;111;116;117;127;128;154;155;156;190;191;192;264;265;266;267;309;310;338;371;390;391;396;397;411;428;429;454;482;483;605;608;644;691;692;870;871;908;909;943;944;945;1004;1005;1038;1039;1050;1051;1120;1121;1139;1140;1141;1216;1217;1222;1223;1361;1423;1442;1457;1478;1550;1587;1588;1687;1688;1700;1701;1731;1801;1802;1818;1837;1883;1923;1924	20;21;22;54;228;229;230;237;238;249;250;251;295;296;297;298;299;357;358;359;360;361;362;363;364;470;471;472;473;474;475;476;477;478;479;480;481;482;483;484;485;486;487;488;489;490;491;492;493;494;495;496;497;498;622;623;667;719;760;761;762;767;768;769;770;771;794;818;819;874;912;913;914;1119;1122;1199;1274;1275;1603;1604;1651;1652;1653;1731;1732;1733;1734;1735;1736;1737;1738;1739;1852;1853;1854;1…	21;54;228;238;250;296;298;363;491;622;667;719;760;770;794;819;874;912;1119;1122;1199;1275;1604;1653;1735;1854;1909;1924;2054;2081;2218;2230;2513;2619;2646;2666;2716;2885;2976;3145;3167;3219;3352;3380;3408;3579;3635
sp|Q9HZJ2|FADB_PSEAE	sp|Q9HZJ2|FADB_PSEAE	6	6	6	>sp|Q9HZJ2|FADB_PSEAE Fatty acid oxidation complex subunit alpha OS=Pseudomonas aeruginosa (strain ATCC 15692 / PAO1 / 1C / PRS 101 / LMG 12228) GN=fadB PE=3 SV=1	1	6	6	6	13.4	13.4	13.4	76.953	715	715	0	59.845	24843000	12				112	324;552;867;902;940;970	True;True;True;True;True;True	327;556;877;912;950;980	544;962;1558;1559;1612;1677;1729;1730	1003;1004;1768;1769;2941;2942;2943;3023;3124;3216;3217;3218	1004;1769;2942;3023;3124;3216
sp|Q9HZJ3|FADA_PSEAE	sp|Q9HZJ3|FADA_PSEAE	2	2	2	>sp|Q9HZJ3|FADA_PSEAE 3-ketoacyl-CoA thiolase OS=Pseudomonas aeruginosa (strain ATCC 15692 / PAO1 / 1C / PRS 101 / LMG 12228) GN=fadA PE=3 SV=1	1	2	2	2	5.9	5.9	5.9	41.643	391	391	0	17.368	6275000	2				113	116;459	True;True	117;463	194;784	366;1449	366;1449
sp|Q9HZP5|ETFD_PSEAE	sp|Q9HZP5|ETFD_PSEAE	2	2	2	>sp|Q9HZP5|ETFD_PSEAE Electron transfer flavoprotein-ubiquinone oxidoreductase OS=Pseudomonas aeruginosa (strain ATCC 15692 / PAO1 / 1C / PRS 101 / LMG 12228) GN=PA2953 PE=1 SV=1	1	2	2	2	5.6	5.6	5.6	59.928	551	551	0	11.008	3493100	1				114	767;804	True;True	776;813	1370;1433	2538;2635	2538;2635
sp|Q9I099|SYT_PSEAE	sp|Q9I099|SYT_PSEAE	1	1	1	>sp|Q9I099|SYT_PSEAE Threonine--tRNA ligase OS=Pseudomonas aeruginosa (strain ATCC 15692 / PAO1 / 1C / PRS 101 / LMG 12228) GN=thrS PE=3 SV=1	1	1	1	1	1.7	1.7	1.7	73.079	640	640	0	5.9647	2312600	2				115	742	TRUE	749	1325	2451;2452	2452
sp|Q9I0A2|RL20_PSEAE	sp|Q9I0A2|RL20_PSEAE	1	1	1	>sp|Q9I0A2|RL20_PSEAE 50S ribosomal protein L20 OS=Pseudomonas aeruginosa (strain ATCC 15692 / PAO1 / 1C / PRS 101 / LMG 12228) GN=rplT PE=3 SV=1	1	1	1	1	8.5	8.5	8.5	13.365	118	118	0	6.5247	1912400	1				116	962	TRUE	972	1716	3190	3190
sp|Q9I0J1|NUOL_PSEAE	sp|Q9I0J1|NUOL_PSEAE	1	1	1	>sp|Q9I0J1|NUOL_PSEAE NADH-quinone oxidoreductase subunit L OS=Pseudomonas aeruginosa (strain ATCC 15692 / PAO1 / 1C / PRS 101 / LMG 12228) GN=nuoL PE=3 SV=1	1	1	1	1	1.6	1.6	1.6	66.227	615	615	0	6.5334	6720000	2				117	881	TRUE	891	1578;1579	2965;2966	2966
sp|Q9I0J5|NUOH_PSEAE	sp|Q9I0J5|NUOH_PSEAE	1	1	1	>sp|Q9I0J5|NUOH_PSEAE NADH-quinone oxidoreductase subunit H OS=Pseudomonas aeruginosa (strain ATCC 15692 / PAO1 / 1C / PRS 101 / LMG 12228) GN=nuoH PE=3 SV=1	1	1	1	1	4.5	4.5	4.5	36.743	331	331	0	14.044	7911300	3				118	948	TRUE	958	1691;1692	3149;3150;3151	3151
sp|Q9I0J6|NUOG_PSEAE	sp|Q9I0J6|NUOG_PSEAE	13	13	13	>sp|Q9I0J6|NUOG_PSEAE NADH-quinone oxidoreductase subunit G OS=Pseudomonas aeruginosa (strain ATCC 15692 / PAO1 / 1C / PRS 101 / LMG 12228) GN=nuoG PE=3 SV=1	1	13	13	13	21.4	21.4	21.4	98.999	905	905	0	105.36	83440000	23				119	82;126;273;278;314;452;546;558;564;611;775;996;1022	True;True;True;True;True;True;True;True;True;True;True;True;True	83;127;275;280;317;456;550;562;568;615;784;1006;1032	139;206;207;458;459;467;529;774;942;971;1001;1002;1079;1080;1383;1777;1820;1821	270;385;386;387;388;878;879;888;983;984;1434;1728;1729;1730;1781;1847;1848;1849;1967;1968;2556;3302;3382;3383;3384	270;387;878;888;984;1434;1729;1781;1847;1968;2556;3302;3382
sp|Q9I0J7|NUOF_PSEAE	sp|Q9I0J7|NUOF_PSEAE	2	2	2	>sp|Q9I0J7|NUOF_PSEAE NADH-quinone oxidoreductase subunit F OS=Pseudomonas aeruginosa (strain ATCC 15692 / PAO1 / 1C / PRS 101 / LMG 12228) GN=nuoF PE=3 SV=1	1	2	2	2	6.5	6.5	6.5	48.678	448	448	0	29.386	5635000	3				120	24;666	True;True	24;671	42;1181;1182	90;2176;2177;2178	90;2177
sp|Q9I0J9|NUOCD_PSEAE	sp|Q9I0J9|NUOCD_PSEAE	5	5	5	>sp|Q9I0J9|NUOCD_PSEAE NADH-quinone oxidoreductase subunit C/D OS=Pseudomonas aeruginosa (strain ATCC 15692 / PAO1 / 1C / PRS 101 / LMG 12228) GN=nuoC PE=3 SV=1	1	5	5	5	11.1	11.1	11.1	68.322	593	593	0	36.717	86352000	9				121	131;201;274;562;770	True;True;True;True;True	132;203;276;566;779	213;214;343;460;461;998;999;1374	395;396;678;880;881;1843;1844;2544;2545	396;678;881;1844;2545
sp|Q9I0K4|ACEA_PSEAE	sp|Q9I0K4|ACEA_PSEAE	10	10	10	>sp|Q9I0K4|ACEA_PSEAE Isocitrate lyase OS=Pseudomonas aeruginosa (strain ATCC 15692 / PAO1 / 1C / PRS 101 / LMG 12228) GN=PA2634 PE=1 SV=1	1	10	10	10	29	29	29	58.886	531	531	0	97.061	121060000	34				122	198;236;377;508;588;639;713;762;856;1011	True;True;True;True;True;True;True;True;True;True	200;238;381;512;592;643;720;769;866;1021	336;337;398;399;632;633;878;879;1043;1128;1129;1279;1280;1359;1360;1533;1534;1535;1536;1537;1803;1804	663;664;665;666;772;773;774;775;776;1166;1167;1617;1618;1916;1917;2064;2065;2066;2067;2068;2366;2367;2368;2369;2370;2511;2512;2863;2864;2865;2866;2867;3353;3354	663;773;1167;1617;1916;2066;2370;2511;2864;3353
sp|Q9I0Q0|PQSH_PSEAE	sp|Q9I0Q0|PQSH_PSEAE	1	1	1	>sp|Q9I0Q0|PQSH_PSEAE 2-heptyl-3-hydroxy-4(1H)-quinolone synthase OS=Pseudomonas aeruginosa (strain ATCC 15692 / PAO1 / 1C / PRS 101 / LMG 12228) GN=pqsH PE=3 SV=1	1	1	1	1	7.6	7.6	7.6	42.081	382	382	0	6.8343	5182900	3				123	125	TRUE	126	204;205	382;383;384	384
sp|Q9I1L9|DLDH1_PSEAE	sp|Q9I1L9|DLDH1_PSEAE	1	1	1	>sp|Q9I1L9|DLDH1_PSEAE Dihydrolipoyl dehydrogenase OS=Pseudomonas aeruginosa (strain ATCC 15692 / PAO1 / 1C / PRS 101 / LMG 12228) GN=lpdV PE=1 SV=1	1	1	1	1	3.2	3.2	3.2	48.588	464	464	0.0044053	5.477	1975600	1				124	957	TRUE	967	1707	3176	3176
sp|Q9I1S2|HCNB_PSEAE	sp|Q9I1S2|HCNB_PSEAE	6	6	6	>sp|Q9I1S2|HCNB_PSEAE Hydrogen cyanide synthase subunit HcnB OS=Pseudomonas aeruginosa (strain ATCC 15692 / PAO1 / 1C / PRS 101 / LMG 12228) GN=hcnB PE=1 SV=1	1	6	6	6	18.5	18.5	18.5	50.388	464	464	0	48.667	50318000	17				125	55;76;257;392;589;897	True;True;True;True;True;True	55;77;259;396;593;907	91;129;130;432;433;655;656;1044;1045;1604;1605	185;252;253;254;825;826;827;828;829;830;1211;1212;1918;1919;3009;3010;3011	185;253;828;1212;1919;3011
sp|Q9I2A8|ATOB_PSEAE	sp|Q9I2A8|ATOB_PSEAE	4	4	4	>sp|Q9I2A8|ATOB_PSEAE Acetyl-CoA acetyltransferase OS=Pseudomonas aeruginosa (strain ATCC 15692 / PAO1 / 1C / PRS 101 / LMG 12228) GN=atoB PE=3 SV=1	1	4	4	4	14.5	14.5	14.5	40.405	393	393	0	24.211	9949600	3				126	79;216;396;685	True;True;True;True	80;218;400;690	135;366;367;662;1212	259;713;714;1219;2213	259;713;1219;2213
sp|Q9I2U0|CLPX_PSEAE	sp|Q9I2U0|CLPX_PSEAE	1	1	1	>sp|Q9I2U0|CLPX_PSEAE ATP-dependent Clp protease ATP-binding subunit ClpX OS=Pseudomonas aeruginosa (strain ATCC 15692 / PAO1 / 1C / PRS 101 / LMG 12228) GN=clpX PE=3 SV=1	1	1	1	1	2.1	2.1	2.1	46.991	426	426	0.0045045	5.5392	1324200	0				127	883	TRUE	893	1581	2968	2968
sp|Q9I2U8|SYQ_PSEAE	sp|Q9I2U8|SYQ_PSEAE	1	1	1	>sp|Q9I2U8|SYQ_PSEAE Glutamine--tRNA ligase OS=Pseudomonas aeruginosa (strain ATCC 15692 / PAO1 / 1C / PRS 101 / LMG 12228) GN=glnS PE=1 SV=1	1	1	1	1	2.3	2.3	2.3	62.912	556	556	0.0046729	5.6921	1660500	1				128	30	TRUE	30	52	103	103
sp|Q9I2V5|ACNB_PSEAE	sp|Q9I2V5|ACNB_PSEAE	20	20	20	>sp|Q9I2V5|ACNB_PSEAE Aconitate hydratase B OS=Pseudomonas aeruginosa (strain ATCC 15692 / PAO1 / 1C / PRS 101 / LMG 12228) GN=acnB PE=3 SV=1	1	20	20	20	30.4	30.4	30.4	93.627	869	869	0	165.08	177600000	52				129	26;43;167;178;323;330;489;538;539;601;640;653;689;782;823;845;872;895;997;1040	True;True;True;True;True;True;True;True;True;True;True;True;True;True;True;True;True;True;True;True	26;43;168;180;326;333;493;542;543;605;644;658;694;695;791;832;855;882;905;1007;1050	45;46;71;72;278;279;303;304;542;543;554;847;925;926;927;1064;1065;1130;1131;1158;1218;1219;1220;1221;1398;1462;1511;1512;1566;1601;1602;1778;1779;1851;1852	94;95;96;151;152;510;511;512;513;601;602;603;604;605;1001;1002;1021;1561;1675;1676;1677;1678;1679;1680;1681;1945;1946;1947;2069;2070;2139;2220;2221;2222;2223;2224;2225;2226;2227;2228;2577;2672;2799;2800;2801;2951;3005;3006;3303;3304;3305;3425;3426	94;152;512;601;1001;1021;1561;1678;1680;1946;2069;2139;2225;2577;2672;2800;2951;3005;3304;3425	8	423
sp|Q9I383|SELD_PSEAE	sp|Q9I383|SELD_PSEAE	2	2	2	>sp|Q9I383|SELD_PSEAE Selenide, water dikinase OS=Pseudomonas aeruginosa (strain ATCC 15692 / PAO1 / 1C / PRS 101 / LMG 12228) GN=selD PE=3 SV=1	1	2	2	2	8.7	8.7	8.7	36.353	344	344	0	11.476	2899100	2				130	104;934	True;True	105;944	173;1666;1667	328;3112;3113	328;3113
sp|Q9I3A8|GPDA_PSEAE	sp|Q9I3A8|GPDA_PSEAE	1	1	1	>sp|Q9I3A8|GPDA_PSEAE Glycerol-3-phosphate dehydrogenase [NAD(P)+] OS=Pseudomonas aeruginosa (strain ATCC 15692 / PAO1 / 1C / PRS 101 / LMG 12228) GN=gpsA PE=3 SV=1	1	1	1	1	3.2	3.2	3.2	36.773	340	340	0	9.8204	524330	1				131	876	TRUE	886	1572	2958	2958
sp|Q9I3D1|DLDH2_PSEAE	sp|Q9I3D1|DLDH2_PSEAE	10	10	10	>sp|Q9I3D1|DLDH2_PSEAE Dihydrolipoyl dehydrogenase OS=Pseudomonas aeruginosa (strain ATCC 15692 / PAO1 / 1C / PRS 101 / LMG 12228) GN=lpdG PE=3 SV=1	1	10	10	10	32.2	32.2	32.2	50.164	478	478	0	100.19	120200000	19				132	25;98;118;124;375;537;722;772;830;903	True;True;True;True;True;True;True;True;True;True	25;99;119;125;379;541;729;781;840;913	43;44;162;163;196;202;203;629;630;923;924;1294;1295;1377;1378;1475;1613;1614	91;92;93;308;309;368;378;379;380;381;1162;1163;1673;1674;2386;2387;2549;2550;2711;3024;3025	92;309;368;380;1163;1674;2387;2550;2711;3024
sp|Q9I3D2|ODO2_PSEAE	sp|Q9I3D2|ODO2_PSEAE	2	2	2	>sp|Q9I3D2|ODO2_PSEAE Dihydrolipoyllysine-residue succinyltransferase component of 2-oxoglutarate dehydrogenase complex OS=Pseudomonas aeruginosa (strain ATCC 15692 / PAO1 / 1C / PRS 101 / LMG 12228) GN=sucB PE=3 SV=1	1	2	2	2	8.6	8.6	8.6	42.887	409	409	0	15.406	5958900	2				133	548;628	True;True	552;632	946;1107	1740;2018	1740;2018
sp|Q9I3F5|ACNA_PSEAE	sp|Q9I3F5|ACNA_PSEAE	14	14	14	>sp|Q9I3F5|ACNA_PSEAE Aconitate hydratase A OS=Pseudomonas aeruginosa (strain ATCC 15692 / PAO1 / 1C / PRS 101 / LMG 12228) GN=acnA PE=3 SV=1	1	14	14	14	25.6	25.6	25.6	99.147	910	910	0	126.71	131970000	47				134	66;220;402;435;448;502;582;877;888;916;923;966;974;1079	True;True;True;True;True;True;True;True;True;True;True;True;True;True	67;222;406;439;452;506;586;887;898;926;933;976;984;1089	112;113;372;373;671;731;751;752;867;868;1031;1573;1589;1590;1591;1592;1632;1642;1643;1723;1735;1736;1921;1922	231;232;720;721;722;723;724;725;726;727;1234;1328;1329;1364;1365;1600;1601;1887;1888;2959;2977;2978;2979;2980;2981;2982;2983;2984;2985;2986;2987;2988;2989;3060;3076;3077;3078;3079;3080;3081;3207;3208;3224;3225;3632;3633;3634	231;724;1234;1328;1364;1600;1888;2959;2983;3060;3079;3207;3224;3633
sp|Q9I4Z4|PAL_PSEAE	sp|Q9I4Z4|PAL_PSEAE	1	1	1	>sp|Q9I4Z4|PAL_PSEAE Peptidoglycan-associated lipoprotein OS=Pseudomonas aeruginosa (strain ATCC 15692 / PAO1 / 1C / PRS 101 / LMG 12228) GN=pal PE=3 SV=1	1	1	1	1	11.3	11.3	11.3	17.925	168	168	0	14.37	16426000	4				135	1076	TRUE	1086	1917;1918	3626;3627;3628;3629	3629
sp|Q9I553|SYA_PSEAE	sp|Q9I553|SYA_PSEAE	1	1	1	>sp|Q9I553|SYA_PSEAE Alanine--tRNA ligase OS=Pseudomonas aeruginosa (strain ATCC 15692 / PAO1 / 1C / PRS 101 / LMG 12228) GN=alaS PE=3 SV=1	1	1	1	1	1.9	1.9	1.9	94.701	874	874	0	8.7291	1371800	1				136	5	TRUE	5	9	18	18
sp|Q9I558|ACSA1_PSEAE;sp|Q9HV66|ACSA2_PSEAE	sp|Q9I558|ACSA1_PSEAE	3;1	3;1	3;1	>sp|Q9I558|ACSA1_PSEAE Acetyl-coenzyme A synthetase 1 OS=Pseudomonas aeruginosa (strain ATCC 15692 / PAO1 / 1C / PRS 101 / LMG 12228) GN=acsA1 PE=3 SV=1	2	3	3	3	7.2	7.2	7.2	71.762	651	651;645	0	37.363	12723000	6				137	108;162;227	True;True;True	109;163;229	181;272;384;385	340;341;504;744;745;746	340;504;746
sp|Q9I576|HPPD_PSEAE	sp|Q9I576|HPPD_PSEAE	1	1	1	>sp|Q9I576|HPPD_PSEAE 4-hydroxyphenylpyruvate dioxygenase OS=Pseudomonas aeruginosa (strain ATCC 15692 / PAO1 / 1C / PRS 101 / LMG 12228) GN=hpd PE=3 SV=1	1	1	1	1	4.2	4.2	4.2	39.912	357	357	0	10.748	289910	1				138	704	TRUE	711	1266	2351	2351
sp|Q9I5A5|PTA_PSEAE	sp|Q9I5A5|PTA_PSEAE	1	1	1	>sp|Q9I5A5|PTA_PSEAE Phosphate acetyltransferase OS=Pseudomonas aeruginosa (strain ATCC 15692 / PAO1 / 1C / PRS 101 / LMG 12228) GN=pta PE=1 SV=1	1	1	1	1	1.4	1.4	1.4	75.696	704	704	0	7.3512	1443900	2				139	956	TRUE	966	1705;1706	3174;3175	3175
sp|Q9I5Z0|METK_PSEAE	sp|Q9I5Z0|METK_PSEAE	6	6	6	>sp|Q9I5Z0|METK_PSEAE S-adenosylmethionine synthase OS=Pseudomonas aeruginosa (strain ATCC 15692 / PAO1 / 1C / PRS 101 / LMG 12228) GN=metK PE=3 SV=1	1	6	6	6	24.7	24.7	24.7	42.709	396	396	0	36.942	29300000	7				140	393;430;670;718;795;1021	True;True;True;True;True;True	397;434;675;725;804;1031	657;658;723;1188;1287;1288;1420;1819	1213;1214;1318;2184;2377;2378;2379;2616;3381	1214;1318;2184;2378;2616;3381
sp|Q9I685|SAHH_PSEAE	sp|Q9I685|SAHH_PSEAE	17	17	17	>sp|Q9I685|SAHH_PSEAE Adenosylhomocysteinase OS=Pseudomonas aeruginosa (strain ATCC 15692 / PAO1 / 1C / PRS 101 / LMG 12228) GN=ahcY PE=3 SV=1	1	17	17	17	49.5	49.5	49.5	51.399	469	469	0	141.21	181370000	47				141	165;169;241;321;423;443;485;614;636;712;743;747;771;785;919;988;1047	True;True;True;True;True;True;True;True;True;True;True;True;True;True;True;True;True	166;170;243;324;427;447;489;618;640;719;750;754;780;794;929;998;1057	275;281;406;407;538;539;709;710;743;744;834;835;836;1085;1086;1122;1123;1278;1326;1334;1335;1375;1376;1402;1403;1636;1637;1762;1763;1862;1863	507;515;787;788;789;790;995;996;997;1293;1294;1295;1346;1347;1348;1349;1350;1351;1352;1353;1537;1538;1539;1984;1985;2055;2056;2364;2365;2453;2470;2471;2472;2473;2546;2547;2548;2582;2583;2584;2585;3066;3067;3265;3266;3437;3438;3439	507;515;790;996;1293;1347;1539;1984;2056;2365;2453;2470;2546;2584;3066;3265;3438
sp|Q9I6E0|ILVD_PSEAE	sp|Q9I6E0|ILVD_PSEAE	1	1	1	>sp|Q9I6E0|ILVD_PSEAE Dihydroxy-acid dehydratase OS=Pseudomonas aeruginosa (strain ATCC 15692 / PAO1 / 1C / PRS 101 / LMG 12228) GN=ilvD PE=3 SV=1	1	1	1	1	2.1	2.1	2.1	65.159	612	612	0	8.2031	3631200	2				142	45	TRUE	45	74;75	154;155	155
sp|Q9I6M4|DAVT_PSEAE	sp|Q9I6M4|DAVT_PSEAE	2	2	2	>sp|Q9I6M4|DAVT_PSEAE 5-aminovalerate aminotransferase DavT OS=Pseudomonas aeruginosa (strain ATCC 15692 / PAO1 / 1C / PRS 101 / LMG 12228) GN=davT PE=1 SV=1	1	2	2	2	8.2	8.2	8.2	45.22	426	426	0	13.369	5175300	2				143	842;870	True;True	852;880	1507;1563	2795;2947	2795;2947
sp|Q9I6M5|DAVD_PSEAE	sp|Q9I6M5|DAVD_PSEAE	2	2	2	>sp|Q9I6M5|DAVD_PSEAE Glutarate-semialdehyde dehydrogenase DavD OS=Pseudomonas aeruginosa (strain ATCC 15692 / PAO1 / 1C / PRS 101 / LMG 12228) GN=davD PE=1 SV=1	1	2	2	2	7.2	7.2	7.2	51.622	483	483	0	29.611	13030000	3				144	594;986	True;True	598;996	1053;1758;1759	1931;3254;3255	1931;3254
sp|Q9I742|CLPV1_PSEAE	sp|Q9I742|CLPV1_PSEAE	4	4	4	>sp|Q9I742|CLPV1_PSEAE Protein ClpV1 OS=Pseudomonas aeruginosa (strain ATCC 15692 / PAO1 / 1C / PRS 101 / LMG 12228) GN=clpV1 PE=1 SV=1	1	4	4	4	6.1	6.1	6.1	98.737	902	902	0	26.666	14238000	4				145	302;626;667;698	True;True;True;True	305;630;672;705	511;1104;1183;1184;1240	962;2014;2179;2180;2287	962;2014;2179;2287
sp|Q9I7B8|SYGB_PSEAE	sp|Q9I7B8|SYGB_PSEAE	3	3	3	>sp|Q9I7B8|SYGB_PSEAE Glycine--tRNA ligase beta subunit OS=Pseudomonas aeruginosa (strain ATCC 15692 / PAO1 / 1C / PRS 101 / LMG 12228) GN=glyS PE=3 SV=1	1	3	3	3	5.8	5.8	5.8	73.973	684	684	0	21.579	8776500	5				146	1;91;279	True;True;True	1;92;281	1;2;152;468	1;2;3;4;291;889	3;291;889
sp|Q9I7C2|GYRB_PSEAE	sp|Q9I7C2|GYRB_PSEAE	3	3	3	>sp|Q9I7C2|GYRB_PSEAE DNA gyrase subunit B OS=Pseudomonas aeruginosa (strain ATCC 15692 / PAO1 / 1C / PRS 101 / LMG 12228) GN=gyrB PE=3 SV=1	1	3	3	3	4.6	4.6	4.6	90.188	806	806	0	22.787	15036000	4				147	39;248;720	True;True;True	39;250;727	65;417;1291;1292	127;805;2383;2384	127;805;2384
sp|Q9S646|PPK_PSEAE	sp|Q9S646|PPK_PSEAE	2	2	2	>sp|Q9S646|PPK_PSEAE Polyphosphate kinase OS=Pseudomonas aeruginosa (strain ATCC 15692 / PAO1 / 1C / PRS 101 / LMG 12228) GN=ppk PE=3 SV=1	1	2	2	2	5.1	5.1	5.1	78.292	690	690	0	13.061	3917700	3				148	520;1050	True;True	524;1060	897;898;1868	1638;1639;1640;3445	1638;3445
tr|G3XCT6|G3XCT6_PSEAE	tr|G3XCT6|G3XCT6_PSEAE	2	2	2	>tr|G3XCT6|G3XCT6_PSEAE Probable two-component sensor OS=Pseudomonas aeruginosa (strain ATCC 15692 / PAO1 / 1C / PRS 101 / LMG 12228) GN=PA1458 PE=4 SV=1	1	2	2	2	4.1	4.1	4.1	79.737	753	753	0	10.948	1339400	1				149	461;740	True;True	465;747	786;1322	1451;2445	1451;2445
tr|G3XCV0|G3XCV0_PSEAE	tr|G3XCV0|G3XCV0_PSEAE	1	1	1	>tr|G3XCV0|G3XCV0_PSEAE Transcriptional regulator FleQ OS=Pseudomonas aeruginosa (strain ATCC 15692 / PAO1 / 1C / PRS 101 / LMG 12228) GN=fleQ PE=1 SV=1	1	1	1	1	2.9	2.9	2.9	55.276	490	490	0	7.0397	1032700	1				150	930	TRUE	940	1660	3106	3106
tr|G3XDA2|G3XDA2_PSEAE	tr|G3XDA2|G3XDA2_PSEAE	1	1	1	>tr|G3XDA2|G3XDA2_PSEAE 3-oxoacyl-[acyl-carrier-protein] synthase 2 OS=Pseudomonas aeruginosa (strain ATCC 15692 / PAO1 / 1C / PRS 101 / LMG 12228) GN=fabF1 PE=1 SV=1	1	1	1	1	5.6	5.6	5.6	43.497	414	414	0	6.9229	626930	1				151	821	TRUE	830	1460	2669	2669
tr|Q9HTB5|Q9HTB5_PSEAE	tr|Q9HTB5|Q9HTB5_PSEAE	1	1	1	>tr|Q9HTB5|Q9HTB5_PSEAE Uncharacterized protein OS=Pseudomonas aeruginosa (strain ATCC 15692 / PAO1 / 1C / PRS 101 / LMG 12228) GN=PA5455 PE=4 SV=1	1	1	1	1	1.5	1.5	1.5	61.018	542	542	0.008547	5.4071	3780300	1				152	207	TRUE	209	351	689	689
tr|Q9HTD1|Q9HTD1_PSEAE	tr|Q9HTD1|Q9HTD1_PSEAE	30	30	30	>tr|Q9HTD1|Q9HTD1_PSEAE Probable transcarboxylase subunit OS=Pseudomonas aeruginosa (strain ATCC 15692 / PAO1 / 1C / PRS 101 / LMG 12228) GN=PA5435 PE=4 SV=1	1	30	30	30	57.7	57.7	57.7	66.095	607	607	0	257.33	819830000	164				153	10;18;99;100;112;140;153;180;200;283;309;364;366;391;401;410;490;664;745;789;790;792;871;999;1000;1001;1061;1062;1064;1072	True;True;True;True;True;True;True;True;True;True;True;True;True;True;True;True;True;True;True;True;True;True;True;True;True;True;True;True;True;True	10;18;100;101;113;141;154;182;202;285;312;367;368;370;395;405;414;494;669;752;798;799;801;881;1009;1010;1011;1071;1072;1074;1082	17;18;30;31;32;33;164;165;166;167;187;188;231;232;253;254;307;308;339;340;341;342;475;476;522;523;609;610;611;613;614;654;669;670;689;690;848;849;1178;1179;1329;1330;1331;1332;1407;1408;1409;1410;1411;1412;1415;1416;1564;1565;1781;1782;1783;1784;1785;1786;1890;1891;1892;1893;1894;1895;1897;1898;1899;1909;1910;1911	46;47;48;49;63;64;65;66;67;68;69;70;71;72;73;74;75;76;310;311;312;313;314;315;316;317;318;319;320;354;355;427;428;429;430;431;453;454;617;618;619;620;621;668;669;670;671;672;673;674;675;676;677;903;904;975;976;977;1123;1124;1125;1126;1127;1128;1129;1130;1131;1132;1133;1135;1136;1137;1138;1139;1140;1210;1230;1231;1232;1233;1268;1269;1270;1271;1272;1273;1562;1563;2164;2165;2166;2167;2168;2169;2170;…	46;64;314;317;355;431;453;619;677;904;975;1126;1137;1210;1233;1269;1563;2165;2467;2593;2603;2611;2949;3314;3323;3329;3592;3599;3604;3615	9	274
tr|Q9HTD8|Q9HTD8_PSEAE	tr|Q9HTD8|Q9HTD8_PSEAE	1	1	1	>tr|Q9HTD8|Q9HTD8_PSEAE Probable transcriptional regulator OS=Pseudomonas aeruginosa (strain ATCC 15692 / PAO1 / 1C / PRS 101 / LMG 12228) GN=PA5428 PE=4 SV=1	1	1	1	1	2.3	2.3	2.3	33.477	302	302	0.0044444	5.4902	3192500	0				154	371	TRUE	375	622	1150	1150
tr|Q9HTD9|Q9HTD9_PSEAE	tr|Q9HTD9|Q9HTD9_PSEAE	7	7	7	>tr|Q9HTD9|Q9HTD9_PSEAE Alcohol dehydrogenase OS=Pseudomonas aeruginosa (strain ATCC 15692 / PAO1 / 1C / PRS 101 / LMG 12228) GN=adhA PE=1 SV=1	1	7	7	7	30.4	30.4	30.4	35.911	342	342	0	57.746	97221000	25				155	11;19;102;405;511;741;749	True;True;True;True;True;True;True	11;19;103;409;515;748;756	19;20;34;35;169;170;679;680;883;1323;1324;1338;1339	50;51;77;78;79;80;81;322;323;1256;1257;1258;1622;2446;2447;2448;2449;2450;2476;2477;2478;2479;2480;2481;2482	51;81;323;1258;1622;2449;2480
tr|Q9HU24|Q9HU24_PSEAE	tr|Q9HU24|Q9HU24_PSEAE	1	1	1	>tr|Q9HU24|Q9HU24_PSEAE dTDP-glucose 4,6-dehydratase OS=Pseudomonas aeruginosa (strain ATCC 15692 / PAO1 / 1C / PRS 101 / LMG 12228) GN=rmlB PE=3 SV=1	1	1	1	1	3.1	3.1	3.1	39.542	352	352	0.004386	5.4612	191510	1				156	1057	TRUE	1067	1884	3583	3583
tr|Q9HU38|Q9HU38_PSEAE	tr|Q9HU38|Q9HU38_PSEAE	1	1	1	>tr|Q9HU38|Q9HU38_PSEAE Uncharacterized protein OS=Pseudomonas aeruginosa (strain ATCC 15692 / PAO1 / 1C / PRS 101 / LMG 12228) GN=PA5146 PE=4 SV=1	1	1	1	1	2.3	2.3	2.3	80.849	750	750	0.0046512	5.6856	86331	1				157	303	TRUE	306	512	963	963
tr|Q9HUD3|Q9HUD3_PSEAE	tr|Q9HUD3|Q9HUD3_PSEAE	1	1	1	>tr|Q9HUD3|Q9HUD3_PSEAE Malic enzyme OS=Pseudomonas aeruginosa (strain ATCC 15692 / PAO1 / 1C / PRS 101 / LMG 12228) GN=PA5046 PE=4 SV=1	1	1	1	1	4.3	4.3	4.3	45.428	422	422	0	14.352	1846600	2				158	788	TRUE	797	1406	2590;2591	2591
tr|Q9HUE2|Q9HUE2_PSEAE	tr|Q9HUE2|Q9HUE2_PSEAE	1	1	1	>tr|Q9HUE2|Q9HUE2_PSEAE Uncharacterized protein OS=Pseudomonas aeruginosa (strain ATCC 15692 / PAO1 / 1C / PRS 101 / LMG 12228) GN=PA5027 PE=3 SV=1	1	1	1	1	5.2	5.2	5.2	29.793	271	271	0	6.5901	3570900	0				159	702	TRUE	709	1263	2348	2348
tr|Q9HUG0|Q9HUG0_PSEAE	tr|Q9HUG0|Q9HUG0_PSEAE	1	1	1	>tr|Q9HUG0|Q9HUG0_PSEAE Probable carbamoyl transferase OS=Pseudomonas aeruginosa (strain ATCC 15692 / PAO1 / 1C / PRS 101 / LMG 12228) GN=PA5005 PE=4 SV=1	1	1	1	1	4.3	4.3	4.3	66.079	585	585	0.0047847	5.8461	9690200	2				160	238	TRUE	240	401;402	778;779	779
tr|Q9HV96|Q9HV96_PSEAE	tr|Q9HV96|Q9HV96_PSEAE	3	3	3	>tr|Q9HV96|Q9HV96_PSEAE Uncharacterized protein OS=Pseudomonas aeruginosa (strain ATCC 15692 / PAO1 / 1C / PRS 101 / LMG 12228) GN=PA4701 PE=4 SV=1	1	3	3	3	6.7	6.7	6.7	58.376	520	520	0	17.594	5516300	3				161	254;581;738	True;True;True	256;585;745	427;1030;1320	817;1886;2443	817;1886;2443
tr|Q9HVA0|Q9HVA0_PSEAE	tr|Q9HVA0|Q9HVA0_PSEAE	1	1	1	>tr|Q9HVA0|Q9HVA0_PSEAE Acetolactate synthase OS=Pseudomonas aeruginosa (strain ATCC 15692 / PAO1 / 1C / PRS 101 / LMG 12228) GN=ilvI PE=3 SV=1	1	1	1	1	3.7	3.7	3.7	63.018	574	574	0	11.461	1841800	3				162	15	TRUE	15	26	57;58;59	57
tr|Q9HVJ1|Q9HVJ1_PSEAE	tr|Q9HVJ1|Q9HVJ1_PSEAE	4	4	4	>tr|Q9HVJ1|Q9HVJ1_PSEAE Probable ATP-binding component of ABC transporter OS=Pseudomonas aeruginosa (strain ATCC 15692 / PAO1 / 1C / PRS 101 / LMG 12228) GN=PA4595 PE=4 SV=1	1	4	4	4	7.8	7.8	7.8	61.32	554	554	0	24.253	9459000	4				163	173;420;421;973	True;True;True;True	174;424;425;983	286;704;705;706;1734	529;1288;1289;1290;3223	529;1288;1290;3223
tr|Q9HVS8|Q9HVS8_PSEAE	tr|Q9HVS8|Q9HVS8_PSEAE	2	2	2	>tr|Q9HVS8|Q9HVS8_PSEAE RoxR OS=Pseudomonas aeruginosa (strain ATCC 15692 / PAO1 / 1C / PRS 101 / LMG 12228) GN=roxR PE=4 SV=1	1	2	2	2	11.3	11.3	11.3	20.616	186	186	0	12.139	279340	3				164	80;963	True;True	81;973	136;1717	260;3191;3192	260;3192
tr|Q9HVU0|Q9HVU0_PSEAE	tr|Q9HVU0|Q9HVU0_PSEAE	4	4	4	>tr|Q9HVU0|Q9HVU0_PSEAE Rod shape-determining protein MreB OS=Pseudomonas aeruginosa (strain ATCC 15692 / PAO1 / 1C / PRS 101 / LMG 12228) GN=mreB PE=4 SV=1	1	4	4	4	18.3	18.3	18.3	36.976	345	345	0	29.175	14490000	7				165	341;350;739;799	True;True;True;True	344;353;746;808	577;578;592;1321;1424;1425	1076;1077;1101;2444;2620;2621;2622;2623;2624;2625	1076;1101;2444;2621
tr|Q9HVY5|Q9HVY5_PSEAE	tr|Q9HVY5|Q9HVY5_PSEAE	2	2	2	>tr|Q9HVY5|Q9HVY5_PSEAE Cytochrome b OS=Pseudomonas aeruginosa (strain ATCC 15692 / PAO1 / 1C / PRS 101 / LMG 12228) GN=PA4430 PE=3 SV=1	1	2	2	2	6.7	6.7	6.7	46.072	403	403	0	21.265	19887000	12				166	286;891	True;True	288;901	479;480;1596;1597	907;908;909;910;2994;2995;2996;2997;2998;2999;3000;3001	909;2998
tr|Q9HVY6|Q9HVY6_PSEAE	tr|Q9HVY6|Q9HVY6_PSEAE	1	1	1	>tr|Q9HVY6|Q9HVY6_PSEAE Probable cytochrome c1 OS=Pseudomonas aeruginosa (strain ATCC 15692 / PAO1 / 1C / PRS 101 / LMG 12228) GN=PA4429 PE=4 SV=1	1	1	1	1	5.8	5.8	5.8	28.993	260	260	0	7.2706	3975500	2				167	915	TRUE	925	1631	3058;3059	3059
tr|Q9HW15|Q9HW15_PSEAE	tr|Q9HW15|Q9HW15_PSEAE	1	1	1	>tr|Q9HW15|Q9HW15_PSEAE Probable short-chain dehydrogenase OS=Pseudomonas aeruginosa (strain ATCC 15692 / PAO1 / 1C / PRS 101 / LMG 12228) GN=speA PE=4 SV=1	1	1	1	1	3.2	3.2	3.2	26.72	252	252	0.0045249	5.5392	0	1				168	503	TRUE	507	869	1602	1602
tr|Q9HW49|Q9HW49_PSEAE	tr|Q9HW49|Q9HW49_PSEAE	3	3	3	>tr|Q9HW49|Q9HW49_PSEAE Uncharacterized protein OS=Pseudomonas aeruginosa (strain ATCC 15692 / PAO1 / 1C / PRS 101 / LMG 12228) GN=PA4352 PE=3 SV=1	1	3	3	3	22.4	22.4	22.4	30.972	286	286	0	21.672	17593000	14				169	147;931;942	True;True;True	148;941;952	243;244;1661;1679;1680	442;443;444;3107;3126;3127;3128;3129;3130;3131;3132;3133;3134;3135	444;3107;3132
tr|Q9HW72|Q9HW72_PSEAE	tr|Q9HW72|Q9HW72_PSEAE	2	2	2	>tr|Q9HW72|Q9HW72_PSEAE Pyruvate kinase OS=Pseudomonas aeruginosa (strain ATCC 15692 / PAO1 / 1C / PRS 101 / LMG 12228) GN=pykA PE=3 SV=1	1	2	2	2	8.1	8.1	8.1	52.252	483	483	0	12.42	3604300	3				170	297;472	True;True	300;476	504;804	952;1478;1479;1480	952;1479
tr|Q9HWG9|Q9HWG9_PSEAE	tr|Q9HWG9|Q9HWG9_PSEAE	5	5	5	>tr|Q9HWG9|Q9HWG9_PSEAE Flavin-containing monooxygenase OS=Pseudomonas aeruginosa (strain ATCC 15692 / PAO1 / 1C / PRS 101 / LMG 12228) GN=phzS PE=1 SV=1	1	5	5	5	20.4	20.4	20.4	43.644	402	402	0	39.334	17690000	11				171	317;468;625;885;1065	True;True;True;True;True	320;472;629;895;1075	532;533;795;796;1103;1584;1900	987;988;1466;1467;1468;1469;1470;2012;2013;2972;3605	987;1467;2013;2972;3605
tr|Q9HWH2|Q9HWH2_PSEAE	tr|Q9HWH2|Q9HWH2_PSEAE	1	1	1	>tr|Q9HWH2|Q9HWH2_PSEAE Probable phenazine-specific methyltransferase OS=Pseudomonas aeruginosa (strain ATCC 15692 / PAO1 / 1C / PRS 101 / LMG 12228) GN=phzM PE=1 SV=1	1	1	1	1	4.2	4.2	4.2	36.357	334	334	0.004717	5.7139	6469600	0				172	800	TRUE	809	1426;1427	2626;2627	2627
tr|Q9HWQ0|Q9HWQ0_PSEAE	tr|Q9HWQ0|Q9HWQ0_PSEAE	5	5	5	>tr|Q9HWQ0|Q9HWQ0_PSEAE Probable iron-sulfur protein OS=Pseudomonas aeruginosa (strain ATCC 15692 / PAO1 / 1C / PRS 101 / LMG 12228) GN=PA4131 PE=4 SV=1	1	5	5	5	12.4	12.4	12.4	63.991	573	573	0	45.432	49240000	10				173	54;252;334;451;608	True;True;True;True;True	54;254;337;455;612	89;90;423;424;560;561;772;773;1074	183;184;813;814;1031;1032;1033;1431;1432;1433;1959	183;814;1031;1432;1959
tr|Q9HWV0|Q9HWV0_PSEAE	tr|Q9HWV0|Q9HWV0_PSEAE	1	1	1	>tr|Q9HWV0|Q9HWV0_PSEAE Probable nonribosomal peptide synthetase OS=Pseudomonas aeruginosa (strain ATCC 15692 / PAO1 / 1C / PRS 101 / LMG 12228) GN=PA4078 PE=4 SV=1	1	1	1	1	1.8	1.8	1.8	110.35	991	991	0	8.2552	619120	1				174	222	TRUE	224	376	733	733
tr|Q9I2C4|Q9I2C4_PSEAE;tr|Q9HX05|Q9HX05_PSEAE	tr|Q9I2C4|Q9I2C4_PSEAE;tr|Q9HX05|Q9HX05_PSEAE	2;2	2;2	2;2	>tr|Q9I2C4|Q9I2C4_PSEAE NAD+ dependent aldehyde dehydrogenase ExaC OS=Pseudomonas aeruginosa (strain ATCC 15692 / PAO1 / 1C / PRS 101 / LMG 12228) GN=exaC PE=3 SV=1;>tr|Q9HX05|Q9HX05_PSEAE Probable aldehyde dehydrogenase OS=Pseudomonas aeruginosa (strain A	2	2	2	2	6.9	6.9	6.9	54.892	506	506;506	0	20.31	10794000	4				175	97;525	True;True	98;529	160;161;903	305;306;307;1646	307;1646
tr|Q9HX44|Q9HX44_PSEAE	tr|Q9HX44|Q9HX44_PSEAE	1	1	1	>tr|Q9HX44|Q9HX44_PSEAE Probable acyl-CoA dehydrogenase OS=Pseudomonas aeruginosa (strain ATCC 15692 / PAO1 / 1C / PRS 101 / LMG 12228) GN=PA3972 PE=3 SV=1	1	1	1	1	5.1	5.1	5.1	60.338	549	549	0	7.3691	1144900	2				176	964	TRUE	974	1718	3193;3194	3193
tr|Q9HY01|Q9HY01_PSEAE	tr|Q9HY01|Q9HY01_PSEAE	3	3	3	>tr|Q9HY01|Q9HY01_PSEAE S-(hydroxymethyl)glutathione dehydrogenase OS=Pseudomonas aeruginosa (strain ATCC 15692 / PAO1 / 1C / PRS 101 / LMG 12228) GN=adhC PE=3 SV=1	1	3	3	3	9.5	9.5	9.5	39.208	370	370	0	18.122	6088700	3				177	239;425;793	True;True;True	241;429;802	403;712;1417	780;781;1297;2613	781;1297;2613
tr|Q9HY12|Q9HY12_PSEAE	tr|Q9HY12|Q9HY12_PSEAE	2	2	2	>tr|Q9HY12|Q9HY12_PSEAE Uncharacterized protein OS=Pseudomonas aeruginosa (strain ATCC 15692 / PAO1 / 1C / PRS 101 / LMG 12228) GN=PA3614 PE=4 SV=1	1	2	2	2	7.9	7.9	7.9	51.921	467	467	0	11.201	2863100	3				178	111;522	True;True	112;526	186;900	352;353;1642	353;1642
tr|Q9HY13|Q9HY13_PSEAE	tr|Q9HY13|Q9HY13_PSEAE	13	13	13	>tr|Q9HY13|Q9HY13_PSEAE Uncharacterized protein OS=Pseudomonas aeruginosa (strain ATCC 15692 / PAO1 / 1C / PRS 101 / LMG 12228) GN=PA3613 PE=4 SV=1	1	13	13	13	23.7	23.7	23.7	88.378	801	801	0	95.665	59524000	25				179	148;300;328;514;638;850;853;854;898;947;969;1004;1078	True;True;True;True;True;True;True;True;True;True;True;True;True	149;303;331;518;642;860;863;864;908;957;979;1014;1088	245;246;508;509;551;887;1126;1127;1524;1529;1530;1606;1607;1689;1690;1727;1728;1791;1920	445;446;958;959;1017;1626;2062;2063;2847;2848;2856;2857;2858;3012;3013;3014;3015;3016;3147;3148;3212;3213;3214;3215;3338;3631	445;959;1017;1626;2062;2848;2856;2858;3014;3148;3215;3338;3631
tr|Q9HY79|Q9HY79_PSEAE	tr|Q9HY79|Q9HY79_PSEAE	1	1	1	>tr|Q9HY79|Q9HY79_PSEAE Ferroxidase OS=Pseudomonas aeruginosa (strain ATCC 15692 / PAO1 / 1C / PRS 101 / LMG 12228) GN=bfrB PE=1 SV=1	1	1	1	1	10.8	10.8	10.8	18.553	158	158	0.0044248	5.487	3587900	2				180	439	TRUE	443	737	1336;1337	1336
tr|Q9HY81|Q9HY81_PSEAE	tr|Q9HY81|Q9HY81_PSEAE	2	2	2	>tr|Q9HY81|Q9HY81_PSEAE Probable peroxidase OS=Pseudomonas aeruginosa (strain ATCC 15692 / PAO1 / 1C / PRS 101 / LMG 12228) GN=PA3529 PE=1 SV=1	1	2	2	2	12	12	12	21.822	200	200	0	17.302	12518000	3				181	151;829	True;True	152;839	251;1473;1474	451;2709;2710	451;2709
tr|Q9HYC8|Q9HYC8_PSEAE	tr|Q9HYC8|Q9HYC8_PSEAE	1	1	1	>tr|Q9HYC8|Q9HYC8_PSEAE Iron-sulfur cluster carrier protein OS=Pseudomonas aeruginosa (strain ATCC 15692 / PAO1 / 1C / PRS 101 / LMG 12228) GN=PA3481 PE=3 SV=1	1	1	1	1	7.1	7.1	7.1	38.888	364	364	0.0086957	5.4311	5777100	2				182	944	TRUE	954	1683;1684	3139;3140	3140
tr|Q9HYR6|Q9HYR6_PSEAE	tr|Q9HYR6|Q9HYR6_PSEAE	2	2	2	>tr|Q9HYR6|Q9HYR6_PSEAE Uncharacterized protein OS=Pseudomonas aeruginosa (strain ATCC 15692 / PAO1 / 1C / PRS 101 / LMG 12228) GN=PA3329 PE=4 SV=1	1	2	2	2	5.9	5.9	5.9	49.134	442	442	0	14.122	7396600	3				183	407;498	True;True	411;502	683;684;862	1261;1262;1592	1262;1592
tr|Q9HYR7|Q9HYR7_PSEAE	tr|Q9HYR7|Q9HYR7_PSEAE	2	2	2	>tr|Q9HYR7|Q9HYR7_PSEAE Probable FAD-dependent monooxygenase OS=Pseudomonas aeruginosa (strain ATCC 15692 / PAO1 / 1C / PRS 101 / LMG 12228) GN=PA3328 PE=4 SV=1	1	2	2	2	7.7	7.7	7.7	42.498	388	388	0	16.658	11460000	3				184	127;141	True;True	128;142	208;233;234	389;432;433	389;433
tr|Q9HYR8|Q9HYR8_PSEAE	tr|Q9HYR8|Q9HYR8_PSEAE	25	25	25	>tr|Q9HYR8|Q9HYR8_PSEAE Probable non-ribosomal peptide synthetase OS=Pseudomonas aeruginosa (strain ATCC 15692 / PAO1 / 1C / PRS 101 / LMG 12228) GN=PA3327 PE=4 SV=1	1	25	25	25	17	17	17	259.4	2352	2352	0	174.35	93029000	45				185	44;49;92;96;152;158;214;346;362;378;400;496;524;543;603;683;730;787;794;825;828;832;847;875;975	True;True;True;True;True;True;True;True;True;True;True;True;True;True;True;True;True;True;True;True;True;True;True;True;True	44;49;93;97;153;159;216;349;365;382;404;500;528;547;607;688;737;796;803;834;838;842;857;885;985	73;81;82;153;159;252;262;263;363;585;607;634;668;859;902;937;938;1067;1209;1307;1405;1418;1419;1465;1471;1472;1477;1515;1516;1571;1737;1738	153;164;165;166;167;168;292;293;294;304;452;464;465;466;467;468;469;708;709;710;1092;1121;1168;1229;1587;1644;1645;1723;1724;1950;2210;2412;2588;2589;2614;2615;2676;2707;2708;2714;2715;2814;2815;2816;2957;3226;3227	153;164;292;304;452;465;708;1092;1121;1168;1229;1587;1645;1724;1950;2210;2412;2589;2615;2676;2708;2715;2814;2957;3227
tr|Q9HYT5|Q9HYT5_PSEAE	tr|Q9HYT5|Q9HYT5_PSEAE	3	3	3	>tr|Q9HYT5|Q9HYT5_PSEAE Uncharacterized protein OS=Pseudomonas aeruginosa (strain ATCC 15692 / PAO1 / 1C / PRS 101 / LMG 12228) GN=PA3309 PE=3 SV=1	1	3	3	3	23.2	23.2	23.2	16.496	151	151	0	25.468	51140000	12				186	442;586;958	True;True;True	446;590;968	741;742;1040;1041;1708;1709	1341;1342;1343;1344;1345;1911;1912;1913;1914;3177;3178;3179	1341;1914;3178
tr|Q9HYT9|Q9HYT9_PSEAE	tr|Q9HYT9|Q9HYT9_PSEAE	2	2	2	>tr|Q9HYT9|Q9HYT9_PSEAE Uncharacterized protein OS=Pseudomonas aeruginosa (strain ATCC 15692 / PAO1 / 1C / PRS 101 / LMG 12228) GN=PA3305 PE=4 SV=1	1	2	2	2	3.9	3.9	3.9	73.137	664	664	0	10.581	1654500	2				187	121;621	True;True	122;625	199;1097	375;2005	375;2005
tr|Q9HYZ6|Q9HYZ6_PSEAE	tr|Q9HYZ6|Q9HYZ6_PSEAE	2	2	2	>tr|Q9HYZ6|Q9HYZ6_PSEAE Site-determining protein OS=Pseudomonas aeruginosa (strain ATCC 15692 / PAO1 / 1C / PRS 101 / LMG 12228) GN=minD PE=3 SV=1	1	2	2	2	10	10	10	29.635	271	271	0	12.945	12513000	3				188	574;908	True;True	578;918	1020;1021;1621	1876;1877;3042	1877;3042
tr|Q9HZ78|Q9HZ78_PSEAE	tr|Q9HZ78|Q9HZ78_PSEAE	3	3	3	>tr|Q9HZ78|Q9HZ78_PSEAE LPS biosynthesis protein WbpG OS=Pseudomonas aeruginosa (strain ATCC 15692 / PAO1 / 1C / PRS 101 / LMG 12228) GN=wbpG PE=4 SV=1	1	3	3	3	13.5	13.5	13.5	43.503	377	377	0	21.193	17590000	4				189	31;535;1069	True;True;True	31;539;1079	53;919;920;1905	104;1669;1670;3610	104;1670;3610
tr|Q9HZC5|Q9HZC5_PSEAE	tr|Q9HZC5|Q9HZC5_PSEAE	2	2	2	>tr|Q9HZC5|Q9HZC5_PSEAE Aminopeptidase N OS=Pseudomonas aeruginosa (strain ATCC 15692 / PAO1 / 1C / PRS 101 / LMG 12228) GN=pepN PE=4 SV=1	1	2	2	2	2.3	2.3	2.3	100.05	885	885	0	13.297	1415900	3				190	296;1044	True;True	299;1054	502;503;1857	950;951;3431	951;3431
tr|Q9HZK4|Q9HZK4_PSEAE	tr|Q9HZK4|Q9HZK4_PSEAE	9	9	9	>tr|Q9HZK4|Q9HZK4_PSEAE Glyceraldehyde-3-phosphate dehydrogenase OS=Pseudomonas aeruginosa (strain ATCC 15692 / PAO1 / 1C / PRS 101 / LMG 12228) GN=PA3001 PE=3 SV=1	1	9	9	9	25.2	25.2	25.2	50.111	461	461	0	76.827	93993000	19				191	213;224;536;650;727;781;810;981;991	True;True;True;True;True;True;True;True;True	215;226;540;655;734;790;819;991;1001	361;362;378;379;921;922;1152;1153;1303;1395;1396;1397;1443;1749;1750;1768;1769	706;707;735;736;737;1671;1672;2129;2130;2131;2405;2574;2575;2576;2648;3241;3242;3273;3274;3275	706;736;1672;2131;2405;2575;2648;3241;3274
tr|Q9HZV6|Q9HZV6_PSEAE	tr|Q9HZV6|Q9HZV6_PSEAE	1	1	1	>tr|Q9HZV6|Q9HZV6_PSEAE Geranyl-CoA carboxylase, alpha-subunit (Biotin-containing) OS=Pseudomonas aeruginosa (strain ATCC 15692 / PAO1 / 1C / PRS 101 / LMG 12228) GN=atuF PE=4 SV=1	1	1	1	1	1.4	1.4	1.4	71.747	661	661	0	6.5958	2234900	1				192	299	TRUE	302	507	957	957
tr|Q9I015|Q9I015_PSEAE	tr|Q9I015|Q9I015_PSEAE	1	1	1	>tr|Q9I015|Q9I015_PSEAE Probable aminotransferase OS=Pseudomonas aeruginosa (strain ATCC 15692 / PAO1 / 1C / PRS 101 / LMG 12228) GN=PA2828 PE=4 SV=1	1	1	1	1	3	3	3	44.799	403	403	0.0048077	5.8591	317570	1				193	721	TRUE	728	1293	2385	2385
tr|Q9I028|Q9I028_PSEAE	tr|Q9I028|Q9I028_PSEAE	3	3	3	>tr|Q9I028|Q9I028_PSEAE Probable acyl-CoA dehydrogenase OS=Pseudomonas aeruginosa (strain ATCC 15692 / PAO1 / 1C / PRS 101 / LMG 12228) GN=PA2815 PE=4 SV=1	1	3	3	3	8.2	8.2	8.2	88.762	815	815	0	20.457	17233000	5				194	540;995;1070	True;True;True	544;1005;1080	928;1775;1776;1906	1682;3299;3300;3301;3611	1682;3300;3611
tr|Q9I056|Q9I056_PSEAE	tr|Q9I056|Q9I056_PSEAE	1	1	1	>tr|Q9I056|Q9I056_PSEAE Carboxypeptidase G2 OS=Pseudomonas aeruginosa (strain ATCC 15692 / PAO1 / 1C / PRS 101 / LMG 12228) GN=cpg2 PE=4 SV=1	1	1	1	1	3.4	3.4	3.4	44.007	412	412	0	6.2385	11683000	9				195	646	TRUE	650	1142;1143	2090;2091;2092;2093;2094;2095;2096;2097;2098	2090
tr|Q9I0D3|Q9I0D3_PSEAE	tr|Q9I0D3|Q9I0D3_PSEAE	1	1	1	>tr|Q9I0D3|Q9I0D3_PSEAE Cysteine synthase OS=Pseudomonas aeruginosa (strain ATCC 15692 / PAO1 / 1C / PRS 101 / LMG 12228) GN=cysK PE=3 SV=1	1	1	1	1	4.3	4.3	4.3	34.309	324	324	0.0045662	5.5417	1899800	0				196	414	TRUE	418	695	1278	1278
tr|Q9I0L4|Q9I0L4_PSEAE	tr|Q9I0L4|Q9I0L4_PSEAE	3	3	3	>tr|Q9I0L4|Q9I0L4_PSEAE Isocitrate dehydrogenase OS=Pseudomonas aeruginosa (strain ATCC 15692 / PAO1 / 1C / PRS 101 / LMG 12228) GN=idh PE=4 SV=1	1	3	3	3	5.1	5.1	5.1	81.633	741	741	0	27.113	19919000	8				197	145;194;440	True;True;True	146;196;444	240;241;329;330;738;739	439;440;650;651;652;653;1338;1339	440;651;1338
tr|Q9I0L5|Q9I0L5_PSEAE	tr|Q9I0L5|Q9I0L5_PSEAE	12	12	12	>tr|Q9I0L5|Q9I0L5_PSEAE Isocitrate dehydrogenase [NADP] OS=Pseudomonas aeruginosa (strain ATCC 15692 / PAO1 / 1C / PRS 101 / LMG 12228) GN=icd PE=3 SV=1	1	12	12	12	38.3	38.3	38.3	45.577	418	418	0	118.4	144430000	38				198	95;135;163;195;295;354;387;729;913;987;1034;1035	True;True;True;True;True;True;True;True;True;True;True;True	96;136;164;197;298;357;391;736;923;997;1044;1045	157;158;221;222;273;331;500;501;597;598;648;1305;1306;1628;1629;1760;1761;1840;1841;1842	300;301;302;303;406;407;408;505;654;655;947;948;949;1107;1108;1109;1203;2407;2408;2409;2410;2411;3053;3054;3055;3056;3256;3257;3258;3259;3260;3261;3262;3263;3264;3413;3414;3415	300;408;505;654;947;1108;1203;2408;3055;3258;3413;3415
tr|Q9I0T1|Q9I0T1_PSEAE	tr|Q9I0T1|Q9I0T1_PSEAE	9	9	9	>tr|Q9I0T1|Q9I0T1_PSEAE Probable acyl-CoA thiolase OS=Pseudomonas aeruginosa (strain ATCC 15692 / PAO1 / 1C / PRS 101 / LMG 12228) GN=PA2553 PE=3 SV=1	1	9	9	9	30.3	30.3	30.3	41.4	396	396	0	69.497	48764000	16				199	87;193;205;294;627;748;892;893;900	True;True;True;True;True;True;True;True;True	88;195;207;297;631;755;902;903;910	145;327;328;348;349;499;1105;1106;1336;1337;1598;1599;1610	280;647;648;649;685;686;687;946;2015;2016;2017;2474;2475;3002;3003;3020;3021	280;647;685;946;2017;2474;3002;3003;3020
tr|Q9I0T2|Q9I0T2_PSEAE	tr|Q9I0T2|Q9I0T2_PSEAE	2	2	2	>tr|Q9I0T2|Q9I0T2_PSEAE Probable acyl-CoA dehydrogenase OS=Pseudomonas aeruginosa (strain ATCC 15692 / PAO1 / 1C / PRS 101 / LMG 12228) GN=PA2552 PE=3 SV=1	1	2	2	2	5.9	5.9	5.9	40.908	375	375	0	14.267	3537600	2				200	394;416	True;True	398;420	659;698	1215;1281	1215;1281
tr|Q9I1F3|Q9I1F3_PSEAE	tr|Q9I1F3|Q9I1F3_PSEAE	1	1	1	>tr|Q9I1F3|Q9I1F3_PSEAE Uncharacterized protein OS=Pseudomonas aeruginosa (strain ATCC 15692 / PAO1 / 1C / PRS 101 / LMG 12228) GN=PA2325 PE=4 SV=1	1	1	1	1	2.2	2.2	2.2	45.188	411	411	0.0045455	5.5398	5497900	2				201	515	TRUE	519	888;889	1627;1628	1627
tr|Q9I1H3|Q9I1H3_PSEAE	tr|Q9I1H3|Q9I1H3_PSEAE	6	6	6	>tr|Q9I1H3|Q9I1H3_PSEAE AmbE OS=Pseudomonas aeruginosa (strain ATCC 15692 / PAO1 / 1C / PRS 101 / LMG 12228) GN=ambE PE=4 SV=1	1	6	6	6	4.5	4.5	4.5	229.04	2124	2124	0	36.784	11291000	4				202	0;83;113;576;914;928	True;True;True;True;True;True	0;84;114;580;924;938	0;140;189;1023;1630;1657	0;271;356;1879;3057;3100	0;271;356;1879;3057;3100
tr|Q9I1N7|Q9I1N7_PSEAE	tr|Q9I1N7|Q9I1N7_PSEAE	2	2	2	>tr|Q9I1N7|Q9I1N7_PSEAE PslB OS=Pseudomonas aeruginosa (strain ATCC 15692 / PAO1 / 1C / PRS 101 / LMG 12228) GN=pslB PE=3 SV=1	1	2	2	2	9.4	9.4	9.4	53.515	488	488	0	13.726	3522900	3				203	247;733	True;True	249;740	416;1311	803;804;2419	804;2419
tr|Q9I1Z6|Q9I1Z6_PSEAE	tr|Q9I1Z6|Q9I1Z6_PSEAE	2	2	2	>tr|Q9I1Z6|Q9I1Z6_PSEAE Alcohol dehydrogenase (Zn-dependent) OS=Pseudomonas aeruginosa (strain ATCC 15692 / PAO1 / 1C / PRS 101 / LMG 12228) GN=PA2119 PE=3 SV=1	1	2	2	2	6.6	6.6	6.6	38.561	366	366	0	18.386	6800700	3				204	512;555	True;True	516;559	884;966;967	1623;1775;1776	1623;1776
tr|Q9I220|Q9I220_PSEAE	tr|Q9I220|Q9I220_PSEAE	1	1	1	>tr|Q9I220|Q9I220_PSEAE Uncharacterized protein OS=Pseudomonas aeruginosa (strain ATCC 15692 / PAO1 / 1C / PRS 101 / LMG 12228) GN=PA2095 PE=4 SV=1	1	1	1	1	2.8	2.8	2.8	32.078	281	281	0.0082988	5.3753	39636000	3				205	780	TRUE	789	1393;1394	2571;2572;2573	2571
tr|Q9I246|Q9I246_PSEAE	tr|Q9I246|Q9I246_PSEAE	7	7	7	>tr|Q9I246|Q9I246_PSEAE Probable carbamoyl transferase OS=Pseudomonas aeruginosa (strain ATCC 15692 / PAO1 / 1C / PRS 101 / LMG 12228) GN=PA2069 PE=4 SV=1	1	7	7	7	18.1	18.1	18.1	63.382	574	574	0	54.069	55793000	20				206	166;260;388;465;580;778;805	True;True;True;True;True;True;True	167;262;392;469;584;787;814	276;277;436;649;650;791;792;1028;1029;1387;1388;1389;1390;1434;1435	508;509;833;1204;1205;1461;1462;1463;1884;1885;2560;2561;2562;2563;2564;2565;2566;2567;2568;2636;2637	508;833;1205;1462;1885;2566;2636
tr|Q9I297|Q9I297_PSEAE	tr|Q9I297|Q9I297_PSEAE	1	1	1	>tr|Q9I297|Q9I297_PSEAE Methylcrotonyl-CoA carboxylase, beta-subunit OS=Pseudomonas aeruginosa (strain ATCC 15692 / PAO1 / 1C / PRS 101 / LMG 12228) GN=liuB PE=1 SV=1	1	1	1	1	6.5	6.5	6.5	57.433	535	535	0	6.4574	1089400	1				207	572	TRUE	576	1017	1873	1873
tr|Q9I299|Q9I299_PSEAE	tr|Q9I299|Q9I299_PSEAE	13	13	13	>tr|Q9I299|Q9I299_PSEAE Methylcrotonyl-CoA carboxylase, alpha-subunit (Biotin-containing) OS=Pseudomonas aeruginosa (strain ATCC 15692 / PAO1 / 1C / PRS 101 / LMG 12228) GN=liuD PE=1 SV=1	1	13	13	13	29.5	29.5	29.5	71.282	655	655	0	93.081	98216000	22				208	78;86;197;311;422;424;438;513;559;569;641;1017;1018	True;True;True;True;True;True;True;True;True;True;True;True;True	79;87;199;314;426;428;442;517;563;573;645;1027;1028	133;134;144;334;335;526;707;708;711;736;885;886;972;973;1011;1012;1132;1813;1814;1815	257;258;278;279;660;661;662;980;1291;1292;1296;1335;1624;1625;1782;1783;1867;1868;2071;3366;3367;3368;3369	258;279;662;980;1292;1296;1335;1625;1783;1867;2071;3366;3369
tr|Q9I2A9|Q9I2A9_PSEAE	tr|Q9I2A9|Q9I2A9_PSEAE	1	1	1	>tr|Q9I2A9|Q9I2A9_PSEAE DhcB, dehydrocarnitine CoA transferase, subunit B OS=Pseudomonas aeruginosa (strain ATCC 15692 / PAO1 / 1C / PRS 101 / LMG 12228) GN=dhcB PE=4 SV=1	1	1	1	1	11	11	11	23.187	218	218	0	7.3581	4755000	3				209	352	TRUE	355	594;595	1103;1104;1105	1105
tr|Q9I2W9|Q9I2W9_PSEAE	tr|Q9I2W9|Q9I2W9_PSEAE	5	5	5	>tr|Q9I2W9|Q9I2W9_PSEAE Phosphoenolpyruvate synthase OS=Pseudomonas aeruginosa (strain ATCC 15692 / PAO1 / 1C / PRS 101 / LMG 12228) GN=ppsA PE=3 SV=1	1	5	5	5	8.6	8.6	8.6	85.816	791	791	0	34.006	21892000	7				210	36;85;266;523;878	True;True;True;True;True	36;86;268;527;888	61;143;448;449;901;1574	119;277;868;869;1643;2960;2961	119;277;869;1643;2961
tr|Q9I2Z1|Q9I2Z1_PSEAE	tr|Q9I2Z1|Q9I2Z1_PSEAE	1	1	1	>tr|Q9I2Z1|Q9I2Z1_PSEAE Uncharacterized protein OS=Pseudomonas aeruginosa (strain ATCC 15692 / PAO1 / 1C / PRS 101 / LMG 12228) GN=PA1746 PE=4 SV=1	1	1	1	1	10.1	10.1	10.1	18.189	168	168	0.0085837	5.4136	1976300	0				211	386	TRUE	390	646;647	1201;1202	1201
tr|Q9I3B2|Q9I3B2_PSEAE	tr|Q9I3B2|Q9I3B2_PSEAE	4	4	4	>tr|Q9I3B2|Q9I3B2_PSEAE Beta-ketoacyl-ACP synthase I OS=Pseudomonas aeruginosa (strain ATCC 15692 / PAO1 / 1C / PRS 101 / LMG 12228) GN=fabB PE=3 SV=1	1	4	4	4	13.8	13.8	13.8	42.806	405	405	0	33.518	35515000	13				212	186;261;287;289	True;True;True;True	188;263;289;291	316;317;437;481;484;485	629;630;631;632;633;634;635;834;911;915;916;917;918	635;834;911;915
tr|Q9I3D3|Q9I3D3_PSEAE	tr|Q9I3D3|Q9I3D3_PSEAE	14	14	14	>tr|Q9I3D3|Q9I3D3_PSEAE 2-oxoglutarate dehydrogenase (E1 subunit) OS=Pseudomonas aeruginosa (strain ATCC 15692 / PAO1 / 1C / PRS 101 / LMG 12228) GN=sucA PE=4 SV=1	1	14	14	14	24.5	24.5	24.5	105.88	943	943	0	123.61	147770000	50				213	161;171;237;249;277;349;398;408;501;597;598;617;649;671	True;True;True;True;True;True;True;True;True;True;True;True;True;True	162;172;239;251;279;352;402;412;505;601;602;621;653;654;676	270;271;284;400;418;419;465;466;590;591;665;685;686;866;1056;1057;1058;1059;1090;1091;1148;1149;1150;1151;1189;1190	501;502;503;527;777;806;807;808;885;886;887;1098;1099;1100;1225;1263;1264;1265;1599;1934;1935;1936;1937;1938;1989;1990;2108;2109;2110;2111;2112;2113;2114;2115;2116;2117;2118;2119;2120;2121;2122;2123;2124;2125;2126;2127;2128;2185;2186;2187	502;527;777;808;887;1098;1225;1265;1599;1935;1937;1989;2114;2187	10	592
tr|Q9I3D4|Q9I3D4_PSEAE	tr|Q9I3D4|Q9I3D4_PSEAE	5	5	5	>tr|Q9I3D4|Q9I3D4_PSEAE Succinate dehydrogenase (B subunit) OS=Pseudomonas aeruginosa (strain ATCC 15692 / PAO1 / 1C / PRS 101 / LMG 12228) GN=sdhB PE=4 SV=1	1	5	5	5	26	26	26	26.155	235	235	0	37.704	77123000	14				214	282;507;633;674;961	True;True;True;True;True	284;511;637;679;971	473;474;876;877;1116;1117;1195;1196;1714;1715	899;900;901;902;1613;1614;1615;1616;2048;2049;2192;2193;3188;3189	900;1614;2048;2193;3188
tr|Q9I3D5|Q9I3D5_PSEAE	tr|Q9I3D5|Q9I3D5_PSEAE	12	12	12	>tr|Q9I3D5|Q9I3D5_PSEAE Succinate dehydrogenase flavoprotein subunit OS=Pseudomonas aeruginosa (strain ATCC 15692 / PAO1 / 1C / PRS 101 / LMG 12228) GN=sdhA PE=3 SV=1	1	12	12	12	26.3	26.3	26.3	63.531	590	590	0	112.42	210150000	61				215	304;313;331;403;404;444;478;479;516;549;714;901	True;True;True;True;True;True;True;True;True;True;True;True	307;316;334;407;408;448;482;483;520;553;721;911	513;514;528;555;556;672;673;674;675;676;677;678;745;813;814;815;816;890;891;947;948;949;950;951;952;953;954;955;956;957;1281;1611	964;965;982;1022;1023;1024;1025;1026;1235;1236;1237;1238;1239;1240;1241;1242;1243;1244;1245;1246;1247;1248;1249;1250;1251;1252;1253;1254;1255;1354;1491;1492;1493;1494;1495;1496;1497;1629;1630;1631;1741;1742;1743;1744;1745;1746;1747;1748;1749;1750;1751;1752;1753;1754;1755;1756;1757;1758;1759;1760;2371;3022	965;982;1023;1237;1243;1354;1493;1496;1630;1743;2371;3022
tr|Q9I3G0|Q9I3G0_PSEAE	tr|Q9I3G0|Q9I3G0_PSEAE	2	2	2	>tr|Q9I3G0|Q9I3G0_PSEAE Cytochrome c oxidase, cbb3-type, CcoN subunit OS=Pseudomonas aeruginosa (strain ATCC 15692 / PAO1 / 1C / PRS 101 / LMG 12228) GN=ccoN2 PE=3 SV=1	1	2	2	2	6.1	6.1	6.1	53.09	475	475	0	15.085	28781000	9				216	837;912	True;True	847;922	1494;1495;1626;1627	2769;2770;2771;2772;3048;3049;3050;3051;3052	2769;3051
tr|Q9I3G1|Q9I3G1_PSEAE;tr|Q9I3G4|Q9I3G4_PSEAE	tr|Q9I3G1|Q9I3G1_PSEAE	3;1	3;1	3;1	>tr|Q9I3G1|Q9I3G1_PSEAE Cytochrome c oxidase, cbb3-type, CcoO subunit OS=Pseudomonas aeruginosa (strain ATCC 15692 / PAO1 / 1C / PRS 101 / LMG 12228) GN=ccoO2 PE=4 SV=1	2	3	3	3	21.8	21.8	21.8	22.778	202	202;203	0	35.613	18168000	7				217	681;861;880	True;True;True	686;871;890	1206;1545;1546;1547;1577	2206;2877;2878;2879;2880;2881;2964	2206;2877;2964
tr|Q9I3G2|Q9I3G2_PSEAE	tr|Q9I3G2|Q9I3G2_PSEAE	5	5	5	>tr|Q9I3G2|Q9I3G2_PSEAE Cbb3-type cytochrome c oxidase subunit OS=Pseudomonas aeruginosa (strain ATCC 15692 / PAO1 / 1C / PRS 101 / LMG 12228) GN=ccoP2 PE=3 SV=1	1	5	5	5	27.3	27.3	27.3	33.812	308	308	0	31.45	52501000	7				218	359;370;860;1037;1045	True;True;True;True;True	362;374;870;1047;1055	604;620;621;1544;1845;1846;1858;1859	1118;1148;1149;2876;3418;3419;3432;3433;3434	1118;1148;2876;3418;3434
tr|Q9I3G3|Q9I3G3_PSEAE	tr|Q9I3G3|Q9I3G3_PSEAE	1	1	1	>tr|Q9I3G3|Q9I3G3_PSEAE Cytochrome c oxidase, cbb3-type, CcoN subunit OS=Pseudomonas aeruginosa (strain ATCC 15692 / PAO1 / 1C / PRS 101 / LMG 12228) GN=ccoN1 PE=3 SV=1	1	1	1	1	2.9	2.9	2.9	53.108	475	475	0	6.4109	9199000	6				219	4	TRUE	4	7;8	12;13;14;15;16;17	15
tr|Q9I3G6|Q9I3G6_PSEAE	tr|Q9I3G6|Q9I3G6_PSEAE	2	2	2	>tr|Q9I3G6|Q9I3G6_PSEAE Probable ferredoxin OS=Pseudomonas aeruginosa (strain ATCC 15692 / PAO1 / 1C / PRS 101 / LMG 12228) GN=PA1551 PE=4 SV=1	1	2	2	2	3.8	3.8	3.8	53.62	471	471	0	12.369	9659600	3				220	343;406	True;True	346;410	581;681;682	1088;1259;1260	1088;1260
tr|Q9I3H0|Q9I3H0_PSEAE	tr|Q9I3H0|Q9I3H0_PSEAE	1	1	1	>tr|Q9I3H0|Q9I3H0_PSEAE Uncharacterized protein OS=Pseudomonas aeruginosa (strain ATCC 15692 / PAO1 / 1C / PRS 101 / LMG 12228) GN=PA1547 PE=4 SV=1	1	1	1	1	4	4	4	24.054	227	227	0.0084388	5.3913	1968600	1				221	575	TRUE	579	1022	1878	1878
tr|Q9I3X2|Q9I3X2_PSEAE	tr|Q9I3X2|Q9I3X2_PSEAE	3	3	3	>tr|Q9I3X2|Q9I3X2_PSEAE Uncharacterized protein OS=Pseudomonas aeruginosa (strain ATCC 15692 / PAO1 / 1C / PRS 101 / LMG 12228) GN=PA1372 PE=4 SV=1	1	3	3	3	6	6	6	79.82	711	711	0	33.484	6821400	6				222	473;529;719	True;True;True	477;533;726	805;910;1289;1290	1481;1482;1654;2380;2381;2382	1481;1654;2382
tr|Q9I4I1|Q9I4I1_PSEAE	tr|Q9I4I1|Q9I4I1_PSEAE	5	5	5	>tr|Q9I4I1|Q9I4I1_PSEAE Ribonucleoside-diphosphate reductase OS=Pseudomonas aeruginosa (strain ATCC 15692 / PAO1 / 1C / PRS 101 / LMG 12228) GN=nrdA PE=3 SV=1	1	5	5	5	7.5	7.5	7.5	107.11	963	963	0	40.207	11837000	9				223	23;578;699;1023;1087	True;True;True;True;True	23;582;706;1033;1097	40;41;1026;1241;1242;1822;1823;1935	87;88;89;1882;2288;2289;3385;3386;3670	89;1882;2288;3385;3670
tr|Q9I4M1|Q9I4M1_PSEAE	tr|Q9I4M1|Q9I4M1_PSEAE	1	1	1	>tr|Q9I4M1|Q9I4M1_PSEAE Uncharacterized protein OS=Pseudomonas aeruginosa (strain ATCC 15692 / PAO1 / 1C / PRS 101 / LMG 12228) GN=PA1114 PE=4 SV=1	1	1	1	1	16.2	16.2	16.2	12.496	111	111	1	-2	14132000	1	+			224	60	TRUE	60	98	199	199	11	49
tr|Q9I4X1|Q9I4X1_PSEAE	tr|Q9I4X1|Q9I4X1_PSEAE	4	4	4	>tr|Q9I4X1|Q9I4X1_PSEAE PqsC OS=Pseudomonas aeruginosa (strain ATCC 15692 / PAO1 / 1C / PRS 101 / LMG 12228) GN=pqsC PE=1 SV=1	1	4	4	4	16.4	16.4	16.4	38.238	348	348	0	31.729	31612000	12				225	47;600;644;711	True;True;True;True	47;604;648;718	77;78;1062;1063;1137;1138;1277	157;158;159;160;161;1942;1943;1944;2078;2079;2080;2363	159;1944;2080;2363
tr|Q9I570|Q9I570_PSEAE	tr|Q9I570|Q9I570_PSEAE	1	1	1	>tr|Q9I570|Q9I570_PSEAE Uncharacterized protein OS=Pseudomonas aeruginosa (strain ATCC 15692 / PAO1 / 1C / PRS 101 / LMG 12228) GN=PA0875 PE=4 SV=1	1	1	1	1	1.1	1.1	1.1	81.037	731	731	0.0087336	5.4397	0	1				226	769	TRUE	778	1373	2543	2543
tr|Q9I5F6|Q9I5F6_PSEAE	tr|Q9I5F6|Q9I5F6_PSEAE	13	13	13	>tr|Q9I5F6|Q9I5F6_PSEAE Bifunctional protein PutA OS=Pseudomonas aeruginosa (strain ATCC 15692 / PAO1 / 1C / PRS 101 / LMG 12228) GN=putA PE=3 SV=1	1	13	13	13	16.1	16.1	16.1	115.63	1060	1060	0	114.64	70546000	25				227	46;120;157;494;632;732;921;976;983;992;1003;1043;1046	True;True;True;True;True;True;True;True;True;True;True;True;True	46;121;158;498;636;739;931;986;993;1002;1013;1053;1056	76;198;260;261;855;856;1114;1115;1310;1640;1739;1740;1752;1753;1770;1771;1789;1790;1856;1860;1861	156;370;371;372;373;374;462;463;1581;1582;2046;2047;2418;3073;3228;3229;3230;3244;3245;3276;3277;3335;3336;3337;3430;3435;3436	156;374;463;1582;2046;2418;3073;3228;3245;3277;3336;3430;3436
tr|Q9I5I5|Q9I5I5_PSEAE	tr|Q9I5I5|Q9I5I5_PSEAE	3	3	3	>tr|Q9I5I5|Q9I5I5_PSEAE Probable enoyl-CoA hydratase/isomerase OS=Pseudomonas aeruginosa (strain ATCC 15692 / PAO1 / 1C / PRS 101 / LMG 12228) GN=PA0744 PE=4 SV=1	1	3	3	3	13.9	13.9	13.9	40.589	367	367	0	16.895	7191200	4				228	316;417;510	True;True;True	319;421;514	531;699;700;882	986;1282;1283;1621	986;1283;1621
tr|Q9I5U9|Q9I5U9_PSEAE	tr|Q9I5U9|Q9I5U9_PSEAE	14	14	14	>tr|Q9I5U9|Q9I5U9_PSEAE Uncharacterized protein OS=Pseudomonas aeruginosa (strain ATCC 15692 / PAO1 / 1C / PRS 101 / LMG 12228) GN=PA0588 PE=4 SV=1	1	14	14	14	28	28	28	73.722	640	640	0	124.03	181230000	42				229	50;107;185;568;577;583;591;648;661;675;709;862;989;1030	True;True;True;True;True;True;True;True;True;True;True;True;True;True	50;108;187;572;581;587;595;652;666;680;716;872;999;1040	83;179;180;314;315;1008;1009;1010;1024;1025;1032;1033;1048;1049;1146;1147;1172;1173;1197;1198;1274;1275;1548;1549;1764;1765;1833;1834	169;336;337;338;339;627;628;1863;1864;1865;1866;1880;1881;1889;1890;1891;1892;1922;1923;2102;2103;2104;2105;2106;2107;2155;2156;2157;2194;2195;2196;2197;2360;2361;2882;2883;2884;3267;3268;3269;3402;3403	169;338;628;1864;1881;1889;1922;2106;2155;2194;2360;2883;3269;3402
tr|Q9I612|Q9I612_PSEAE	tr|Q9I612|Q9I612_PSEAE	2	2	2	>tr|Q9I612|Q9I612_PSEAE Probable acyl-CoA dehydrogenase OS=Pseudomonas aeruginosa (strain ATCC 15692 / PAO1 / 1C / PRS 101 / LMG 12228) GN=PA0506 PE=3 SV=1	1	2	2	2	5.3	5.3	5.3	65.358	601	601	0	11.725	6355200	2				230	460;492	True;True	464;496	785;851;852	1450;1576;1577	1450;1577
tr|Q9I659|Q9I659_PSEAE	tr|Q9I659|Q9I659_PSEAE	7	7	5	>tr|Q9I659|Q9I659_PSEAE Probable ClpA/B protease ATP binding subunit OS=Pseudomonas aeruginosa (strain ATCC 15692 / PAO1 / 1C / PRS 101 / LMG 12228) GN=PA0459 PE=4 SV=1	1	7	7	5	10.6	10.6	7.9	94.174	850	850	0	55.23	16481000	11				231	61;312;563;691;703;728;851	True;True;True;True;True;True;True	61;315;567;697;710;735;861	99;527;1000;1224;1264;1265;1304;1525;1526	200;981;1845;1846;2232;2349;2350;2406;2849;2850;2851;2852	200;981;1846;2232;2349;2406;2851
tr|Q9I671|Q9I671_PSEAE	tr|Q9I671|Q9I671_PSEAE	2	2	2	>tr|Q9I671|Q9I671_PSEAE Glutaryl-CoA dehydrogenase OS=Pseudomonas aeruginosa (strain ATCC 15692 / PAO1 / 1C / PRS 101 / LMG 12228) GN=gcdH PE=3 SV=1	1	2	2	2	8.4	8.4	8.4	43.311	393	393	0	21.121	10305000	6				232	182;695	True;True	184;702	311;1236	624;2276;2277;2278;2279;2280	624;2276
tr|Q9I672|Q9I672_PSEAE	tr|Q9I672|Q9I672_PSEAE	1	1	1	>tr|Q9I672|Q9I672_PSEAE Uncharacterized protein OS=Pseudomonas aeruginosa (strain ATCC 15692 / PAO1 / 1C / PRS 101 / LMG 12228) GN=PA0446 PE=4 SV=1	1	1	1	1	6.1	6.1	6.1	43.846	407	407	0	9.8836	2498800	5				233	952	TRUE	962	1698;1699	3161;3162;3163;3164;3165	3161
tr|Q9I687|Q9I687_PSEAE	tr|Q9I687|Q9I687_PSEAE	3	3	3	>tr|Q9I687|Q9I687_PSEAE Methylenetetrahydrofolate reductase OS=Pseudomonas aeruginosa (strain ATCC 15692 / PAO1 / 1C / PRS 101 / LMG 12228) GN=metF PE=3 SV=1	1	3	3	3	13.8	13.8	13.8	32.228	290	290	0	19.52	10081000	3				234	556;796;1051	True;True;True	560;805;1061	968;1421;1869	1777;1778;2617;3446	1778;2617;3446
tr|Q9I688|Q9I688_PSEAE	tr|Q9I688|Q9I688_PSEAE	1	1	1	>tr|Q9I688|Q9I688_PSEAE Uncharacterized protein OS=Pseudomonas aeruginosa (strain ATCC 15692 / PAO1 / 1C / PRS 101 / LMG 12228) GN=PA0429 PE=4 SV=1	1	1	1	1	6.7	6.7	6.7	40.872	356	356	0.008658	5.4253	1743400	0				235	155	TRUE	156	257	457	457
tr|Q9I689|Q9I689_PSEAE	tr|Q9I689|Q9I689_PSEAE	1	1	1	>tr|Q9I689|Q9I689_PSEAE ATP-dependent RNA helicase RhlE OS=Pseudomonas aeruginosa (strain ATCC 15692 / PAO1 / 1C / PRS 101 / LMG 12228) GN=rhlE PE=3 SV=1	1	1	1	1	3.8	3.8	3.8	70.111	639	639	0.0045872	5.5745	360930	4				236	156	TRUE	157	258;259	458;459;460;461	459
tr|Q9I6A0|Q9I6A0_PSEAE	tr|Q9I6A0|Q9I6A0_PSEAE	1	1	1	>tr|Q9I6A0|Q9I6A0_PSEAE Probable cystathionine gamma-lyase OS=Pseudomonas aeruginosa (strain ATCC 15692 / PAO1 / 1C / PRS 101 / LMG 12228) GN=PA0400 PE=3 SV=1	1	1	1	1	5.3	5.3	5.3	42.786	394	394	0	8.1787	2668700	1				237	616	TRUE	620	1088;1089	1987;1988	1987
tr|Q9I6H5|Q9I6H5_PSEAE	tr|Q9I6H5|Q9I6H5_PSEAE	4	4	4	>tr|Q9I6H5|Q9I6H5_PSEAE D-3-phosphoglycerate dehydrogenase OS=Pseudomonas aeruginosa (strain ATCC 15692 / PAO1 / 1C / PRS 101 / LMG 12228) GN=serA PE=3 SV=1	1	4	4	4	13.4	13.4	13.4	44.216	409	409	0	34.85	19683000	17				238	3;284;333;838	True;True;True;True	3;286;336;848	5;6;477;559;1496;1497;1498;1499	10;11;905;1029;1030;2773;2774;2775;2776;2777;2778;2779;2780;2781;2782;2783;2784	11;905;1030;2774
tr|Q9I6J2|Q9I6J2_PSEAE	tr|Q9I6J2|Q9I6J2_PSEAE	1	1	1	>tr|Q9I6J2|Q9I6J2_PSEAE Putrescine aminotransferase OS=Pseudomonas aeruginosa (strain ATCC 15692 / PAO1 / 1C / PRS 101 / LMG 12228) GN=spuC PE=3 SV=1	1	1	1	1	3.1	3.1	3.1	50.452	456	456	0.0083682	5.377	6333100	0				239	1042	TRUE	1052	1854;1855	3428;3429	3429
tr|Q9I6Z1|Q9I6Z1_PSEAE	tr|Q9I6Z1|Q9I6Z1_PSEAE	2	2	2	>tr|Q9I6Z1|Q9I6Z1_PSEAE Uncharacterized protein OS=Pseudomonas aeruginosa (strain ATCC 15692 / PAO1 / 1C / PRS 101 / LMG 12228) GN=PA0141 PE=4 SV=1	1	2	2	2	9.1	9.1	9.1	34.463	298	298	0	10.765	10057000	3				240	471;1027	True;True	475;1037	802;803;1829	1476;1477;3394	1476;3394
tr|Q9I6Z3|Q9I6Z3_PSEAE	tr|Q9I6Z3|Q9I6Z3_PSEAE	2	2	2	>tr|Q9I6Z3|Q9I6Z3_PSEAE Alkyl hydroperoxide reductase subunit C OS=Pseudomonas aeruginosa (strain ATCC 15692 / PAO1 / 1C / PRS 101 / LMG 12228) GN=ahpC PE=4 SV=1	1	2	2	2	12.3	12.3	12.3	20.541	187	187	0	10.921	3413100	1				241	361;910	True;True	364;920	606;1623	1120;3044	1120;3044
tr|Q9I738|Q9I738_PSEAE	tr|Q9I738|Q9I738_PSEAE	1	1	1	>tr|Q9I738|Q9I738_PSEAE Uncharacterized protein OS=Pseudomonas aeruginosa (strain ATCC 15692 / PAO1 / 1C / PRS 101 / LMG 12228) GN=PA0094 PE=1 SV=1	1	1	1	1	5.6	5.6	5.6	16.488	144	144	0.0086207	5.4179	2240900	1				242	206	TRUE	208	350	688	688
tr|Q9I748|Q9I748_PSEAE	tr|Q9I748|Q9I748_PSEAE	4	4	4	>tr|Q9I748|Q9I748_PSEAE Uncharacterized protein OS=Pseudomonas aeruginosa (strain ATCC 15692 / PAO1 / 1C / PRS 101 / LMG 12228) GN=PA0084 PE=4 SV=1	1	4	4	4	12.7	12.7	12.7	55.771	498	498	0	30.284	25799000	7				243	28;413;811;1068	True;True;True;True	28;417;820;1078	49;50;694;1444;1903;1904	99;100;101;1277;2649;3608;3609	101;1277;2649;3609

## Sheet: 5-1 proteinGroups Probe 12
Protein IDs	Majority protein IDs	Peptide counts (all)	Peptide counts (razor+unique)	Peptide counts (unique)	Fasta headers	Number of proteins	Peptides	Razor + unique peptides	Unique peptides	Sequence coverage [%]	Unique + razor sequence coverage [%]	Unique sequence coverage [%]	Mol. weight [kDa]	Sequence length	Sequence lengths	Q-value	Score	Intensity	MS/MS Count	Only identified by site	Reverse	Potential contaminant	id	Peptide IDs	Peptide is razor	Mod. peptide IDs	Evidence IDs	MS/MS IDs	Best MS/MS	Oxidation (M) site IDs	Oxidation (M) site positions
CON__Q9R0H5;CON__Q6NXH9;CON__Q6IFZ6;CON__Q7Z794;CON__ENSEMBL:ENSBTAP00000038253;CON__P04264;CON__P35908	CON__Q9R0H5;CON__Q6NXH9;CON__Q6IFZ6;CON__Q7Z794;CON__ENSEMBL:ENSBTAP00000038253;CON__P04264;CON__P35908	1;1;1;1;1;1;1	1;1;1;1;1;1;1	1;1;1;1;1;1;1	>Q9R0H5 SWISS-PROT:Q9R0H5 Tax_Id=10090 Gene_Symbol=Krt71 Keratin, type II cytoskeletal 6G;>Q6NXH9 TREMBL:Q6NXH9 Tax_Id=10090 Gene_Symbol=Krt73 Keratin 73;>Q6IFZ6 SWISS-PROT:Q6IFZ6 Tax_Id=10090 Gene_Symbol=Krt77 Keratin, type II cytoskeletal 1b;>Q7Z794 SWIS	7	1	1	1	2.3	2.3	2.3	57.382	524	524;539;572;578;606;644;645	0	13.051	3492600	3			+	0	295	TRUE	298	498	985;986;987	987
CON__P00761	CON__P00761	4	4	4	>P00761 SWISS-PROT:P00761|TRYP_PIG Trypsin - Sus scrofa (Pig).	1	4	4	4	25.1	25.1	25.1	24.409	231	231	0	57.727	1665700000	79			+	1	449;568;640;961	True;True;True;True	454;575;647;974	749;750;751;752;971;972;973;974;1115;1116;1696;1697;1698;1699;1700;1701	1418;1419;1420;1421;1422;1423;1424;1425;1426;1878;1879;1880;1881;1882;1883;1884;1885;1886;1887;1888;1889;1890;1891;1892;1893;1894;1895;1896;1897;1898;1899;1900;1901;1902;1903;1904;1905;2150;2151;2152;2153;2154;2155;2156;2157;3319;3320;3321;3322;3323;3324;3325;3326;3327;3328;3329;3330;3331;3332;3333;3334;3335;3336;3337;3338;3339;3340;3341;3342;3343;3344;3345;3346;3347;3348;3349;3350;3351;3352	1421;1888;2151;3345
CON__P13645;CON__P02535-1	CON__P13645;CON__P02535-1	2;1	2;1	2;1	>P13645 SWISS-PROT:P13645 Tax_Id=9606 Gene_Symbol=KRT10 Keratin, type I cytoskeletal 10;>P02535-1 SWISS-PROT:P02535-1 Tax_Id=10090 Gene_Symbol=Krt10 Isoform 1 of Keratin, type I cytoskeletal 10	2	2	2	2	3.5	3.5	3.5	59.51	593	593;570	0	12.328	5031900	3			+	2	558;852	True;True	565;864	952;953;1501	1847;1848;1849;2891	1849;2891
CON__Streptavidin	CON__Streptavidin	7	7	7	>Streptavidin (S.avidinii)	1	7	7	7	49.4	49.4	49.4	16.622	160	160	0	110.38	2116300000	369			+	3	475;476;725;856;1089;1090;1119	True;True;True;True;True;True;True	480;481;736;868;1102;1103;1132	792;793;794;795;796;797;798;799;800;801;802;803;804;805;806;807;808;809;810;811;812;813;814;815;816;1269;1270;1271;1272;1273;1274;1275;1276;1277;1278;1279;1280;1281;1282;1283;1284;1285;1286;1287;1288;1289;1290;1291;1292;1507;1508;1509;1510;1511;1921;1922;1923;1924;1925;1926;1927;1928;1929;1930;1931;1932;1933;1934;1935;1936;1937;1938;1939;1940;1988;1989	1491;1492;1493;1494;1495;1496;1497;1498;1499;1500;1501;1502;1503;1504;1505;1506;1507;1508;1509;1510;1511;1512;1513;1514;1515;1516;1517;1518;1519;1520;1521;1522;1523;1524;1525;1526;1527;1528;1529;1530;1531;1532;1533;1534;1535;1536;1537;1538;1539;1540;1541;1542;1543;1544;1545;1546;1547;1548;1549;1550;1551;1552;1553;1554;1555;1556;1557;1558;1559;1560;1561;1562;1563;1564;1565;1566;1567;1568;1569;1570…	1557;1624;2514;2910;3759;3826;3920
REV__sp|Q9I0K9|PUR8_PSEAE	REV__sp|Q9I0K9|PUR8_PSEAE	1	1	1	>sp|Q9I0K9|PUR8_PSEAE Adenylosuccinate lyase OS=Pseudomonas aeruginosa (strain ATCC 15692 / PAO1 / 1C / PRS 101 / LMG 12228) GN=purB PE=3 SV=1	1	1	1	1	0	0	0	50.5	456	456	0.0084388	5.5496	580880	2		+		4	170	TRUE	172	282;283	528;529	529
REV__tr|Q9HXW2|Q9HXW2_PSEAE	REV__tr|Q9HXW2|Q9HXW2_PSEAE	1	1	1	>tr|Q9HXW2|Q9HXW2_PSEAE Probable transcriptional regulator OS=Pseudomonas aeruginosa (strain ATCC 15692 / PAO1 / 1C / PRS 101 / LMG 12228) GN=PA3678 PE=4 SV=1	1	1	1	1	0	0	0	23.15	212	212	0.004386	5.8022	153670000	16		+		5	523	TRUE	530	898;899	1767;1768;1769;1770;1771;1772;1773;1774;1775;1776;1777;1778;1779;1780;1781;1782	1768
sp|G3XD12|HCNC_PSEAE	sp|G3XD12|HCNC_PSEAE	2	2	2	>sp|G3XD12|HCNC_PSEAE Hydrogen cyanide synthase subunit HcnC OS=Pseudomonas aeruginosa (strain ATCC 15692 / PAO1 / 1C / PRS 101 / LMG 12228) GN=hcnC PE=1 SV=1	1	2	2	2	8.4	8.4	8.4	45.281	417	417	0	19.781	10135000	3				6	895;912	True;True	907;924	1597;1621	3155;3187;3188	3155;3187
sp|G3XD23|WBPB_PSEAE	sp|G3XD23|WBPB_PSEAE	5	5	5	>sp|G3XD23|WBPB_PSEAE UDP-N-acetyl-2-amino-2-deoxy-D-glucuronate oxidase OS=Pseudomonas aeruginosa (strain ATCC 15692 / PAO1 / 1C / PRS 101 / LMG 12228) GN=wbpB PE=1 SV=1	1	5	5	5	20.3	20.3	20.3	35.717	316	316	0	34.777	78208000	12				7	3;673;736;761;812	True;True;True;True;True	3;681;747;772;823	4;5;1171;1172;1309;1310;1356;1435;1436	9;10;11;12;2272;2273;2551;2552;2639;2779;2780;2781	11;2272;2551;2639;2779
sp|G3XD61|WBPI_PSEAE	sp|G3XD61|WBPI_PSEAE	7	7	7	>sp|G3XD61|WBPI_PSEAE UDP-2,3-diacetamido-2,3-dideoxy-D-glucuronate 2-epimerase OS=Pseudomonas aeruginosa (strain ATCC 15692 / PAO1 / 1C / PRS 101 / LMG 12228) GN=wbpI PE=1 SV=1	1	7	7	7	31.4	31.4	31.4	38.907	354	354	0	72.475	96877000	16				8	139;466;501;698;824;901;1014	True;True;True;True;True;True;True	141;471;508;707;835;913;1027	233;234;777;854;1217;1218;1455;1605;1606;1792;1793	454;455;456;457;1458;1684;2365;2366;2367;2809;2810;3167;3168;3169;3508;3509	457;1458;1684;2365;2810;3169;3509
sp|G3XD94|UGND_PSEAE	sp|G3XD94|UGND_PSEAE	6	6	6	>sp|G3XD94|UGND_PSEAE UDP-N-acetyl-D-glucosamine 6-dehydrogenase OS=Pseudomonas aeruginosa (strain ATCC 15692 / PAO1 / 1C / PRS 101 / LMG 12228) GN=wbpA PE=1 SV=1	1	6	6	6	18.8	18.8	18.8	48.155	436	436	0	41.397	20164000	8				9	127;155;217;258;692;772	True;True;True;True;True;True	129;157;220;261;701;783	213;259;373;439;1207;1208;1373	429;493;777;890;2349;2350;2669;2670	429;493;777;890;2349;2669
sp|O30508|ARUC_PSEAE	sp|O30508|ARUC_PSEAE	2	2	2	>sp|O30508|ARUC_PSEAE Succinylornithine transaminase/acetylornithine aminotransferase OS=Pseudomonas aeruginosa (strain ATCC 15692 / PAO1 / 1C / PRS 101 / LMG 12228) GN=aruC PE=1 SV=2	1	2	2	2	8.6	8.6	8.6	43.747	406	406	0	19.707	16906000	3				10	834;972	True;True	845;985	1472;1718;1719	2830;3374;3375;3376	2830;3375
sp|O52759|RS4_PSEAE	sp|O52759|RS4_PSEAE	6	6	6	>sp|O52759|RS4_PSEAE 30S ribosomal protein S4 OS=Pseudomonas aeruginosa (strain ATCC 15692 / PAO1 / 1C / PRS 101 / LMG 12228) GN=rpsD PE=3 SV=2	1	6	6	6	29.1	29.1	29.1	23.277	206	206	0	49.004	102150000	17				11	68;506;552;637;801;969	True;True;True;True;True;True	70;513;559;644;812;982	124;125;862;943;1107;1108;1417;1712;1713;1714	266;267;268;269;270;271;1701;1836;2136;2137;2138;2139;2140;2141;2753;3368;3369;3370	268;1701;1836;2140;2753;3368
sp|O52760|RPOA_PSEAE	sp|O52760|RPOA_PSEAE	6	6	6	>sp|O52760|RPOA_PSEAE DNA-directed RNA polymerase subunit alpha OS=Pseudomonas aeruginosa (strain ATCC 15692 / PAO1 / 1C / PRS 101 / LMG 12228) GN=rpoA PE=3 SV=2	1	6	6	6	19.2	19.2	19.2	36.649	333	333	0	37.236	23161000	10				12	403;492;632;712;840;1043	True;True;True;True;True;True	408;497;639;721;851;1056	682;839;1100;1241;1242;1479;1847	1315;1661;2125;2401;2402;2403;2404;2838;3612;3613	1315;1661;2125;2403;2838;3612
sp|O52761|RL17_PSEAE	sp|O52761|RL17_PSEAE	1	1	1	>sp|O52761|RL17_PSEAE 50S ribosomal protein L17 OS=Pseudomonas aeruginosa (strain ATCC 15692 / PAO1 / 1C / PRS 101 / LMG 12228) GN=rplQ PE=3 SV=1	1	1	1	1	13.2	13.2	13.2	14.504	129	129	0	6.1157	0	1				13	102	TRUE	104	173	353	353
sp|O52762|CATA_PSEAE	sp|O52762|CATA_PSEAE	4	4	4	>sp|O52762|CATA_PSEAE Catalase OS=Pseudomonas aeruginosa (strain ATCC 15692 / PAO1 / 1C / PRS 101 / LMG 12228) GN=katA PE=1 SV=1	1	4	4	4	13.1	13.1	13.1	55.588	482	482	0	50.66	44923000	8				14	373;377;561;650	True;True;True;True	377;381;568;657	633;634;638;957;958;1129	1205;1206;1207;1208;1212;1854;1855;2176	1208;1212;1855;2176
sp|O54439|ACP1_PSEAE	sp|O54439|ACP1_PSEAE	2	2	2	>sp|O54439|ACP1_PSEAE Acyl carrier protein 1 OS=Pseudomonas aeruginosa (strain ATCC 15692 / PAO1 / 1C / PRS 101 / LMG 12228) GN=acpP1 PE=3 SV=4	1	2	2	2	32.1	32.1	32.1	8.7406	78	78	0	16.403	24672000	3				15	494;495	True;True	501;502	844;845;846	1673;1674;1675	1673;1675
sp|O68822|AMPA_PSEAE	sp|O68822|AMPA_PSEAE	13	13	13	>sp|O68822|AMPA_PSEAE Cytosol aminopeptidase OS=Pseudomonas aeruginosa (strain ATCC 15692 / PAO1 / 1C / PRS 101 / LMG 12228) GN=pepA PE=3 SV=1	1	13	13	13	33.5	33.5	33.5	52.331	495	495	0	129.47	627510000	71				16	143;144;213;247;355;360;513;541;594;609;644;878;984	True;True;True;True;True;True;True;True;True;True;True;True;True	145;146;216;250;359;364;520;548;601;616;651;890;997	240;241;242;243;244;365;366;419;420;602;603;612;613;878;879;927;928;1036;1037;1062;1063;1064;1121;1122;1552;1553;1740;1741	464;465;466;467;468;469;470;471;472;473;758;759;760;761;762;763;852;853;854;855;856;857;858;1152;1153;1154;1169;1170;1171;1172;1173;1174;1175;1176;1177;1178;1735;1736;1818;1819;2018;2019;2020;2021;2022;2023;2024;2059;2060;2061;2062;2063;2064;2065;2066;2067;2068;2069;2070;2071;2072;2167;2168;2169;3024;3025;3026;3027;3411;3412;3413	466;473;762;852;1152;1176;1735;1818;2023;2067;2168;3027;3411
sp|Q9S508|PHZB2_PSEAE;sp|O69753|PHZB1_PSEAE	sp|Q9S508|PHZB2_PSEAE;sp|O69753|PHZB1_PSEAE	1;1	1;1	1;1	>sp|Q9S508|PHZB2_PSEAE Phenazine biosynthesis protein PhzB 2 OS=Pseudomonas aeruginosa (strain ATCC 15692 / PAO1 / 1C / PRS 101 / LMG 12228) GN=phzB2 PE=1 SV=1;>sp|O69753|PHZB1_PSEAE Phenazine biosynthesis protein PhzB 1 OS=Pseudomonas aeruginosa (strain A	2	1	1	1	6.2	6.2	6.2	19.027	162	162;162	0	6.3404	1982700	1				17	96	TRUE	98	166	342	342
sp|O69754|PHZF_PSEAE	sp|O69754|PHZF_PSEAE	2	2	2	>sp|O69754|PHZF_PSEAE Trans-2,3-dihydro-3-hydroxyanthranilate isomerase OS=Pseudomonas aeruginosa (strain ATCC 15692 / PAO1 / 1C / PRS 101 / LMG 12228) GN=phzF1 PE=3 SV=2	1	2	2	2	13.3	13.3	13.3	30.342	278	278	0	12.906	10934000	4				18	687;691	True;True	696;700	1198;1199;1206	2331;2332;2333;2348	2332;2348
sp|O82850|RS2_PSEAE	sp|O82850|RS2_PSEAE	2	2	2	>sp|O82850|RS2_PSEAE 30S ribosomal protein S2 OS=Pseudomonas aeruginosa (strain ATCC 15692 / PAO1 / 1C / PRS 101 / LMG 12228) GN=rpsB PE=3 SV=2	1	2	2	2	9.8	9.8	9.8	27.336	246	246	0	17.666	46587000	7				19	913;1076	True;True	925;1089	1622;1623;1900;1901	3189;3190;3191;3192;3193;3698;3699	3190;3698
sp|O86428|ILVE_PSEAE	sp|O86428|ILVE_PSEAE	2	2	2	>sp|O86428|ILVE_PSEAE Branched-chain-amino-acid aminotransferase OS=Pseudomonas aeruginosa (strain ATCC 15692 / PAO1 / 1C / PRS 101 / LMG 12228) GN=ilvE PE=1 SV=2	1	2	2	2	6.8	6.8	6.8	34.084	307	307	0	14.352	14092000	4				20	161;163	True;True	163;165	268;269;271	509;510;511;514	510;514
sp|O87125|CHEB1_PSEAE	sp|O87125|CHEB1_PSEAE	1	1	1	>sp|O87125|CHEB1_PSEAE Chemotaxis response regulator protein-glutamate methylesterase of group 1 operon OS=Pseudomonas aeruginosa (strain ATCC 15692 / PAO1 / 1C / PRS 101 / LMG 12228) GN=cheB1 PE=1 SV=2	1	1	1	1	4.6	4.6	4.6	39.004	368	368	0	6.9349	452740	3				21	974	TRUE	987	1722;1723	3380;3381;3382	3380
sp|P04739|FMPO_PSEAE	sp|P04739|FMPO_PSEAE	2	2	2	>sp|P04739|FMPO_PSEAE Fimbrial protein OS=Pseudomonas aeruginosa (strain ATCC 15692 / PAO1 / 1C / PRS 101 / LMG 12228) GN=pilA PE=1 SV=1	1	2	2	2	15.4	15.4	15.4	15.512	149	149	0	14.784	36042000	3				22	817;938	True;True	828;951	1444;1445;1660	2797;2798;3266	2797;3266
sp|P05384|DBHB_PSEAE	sp|P05384|DBHB_PSEAE	1	1	1	>sp|P05384|DBHB_PSEAE DNA-binding protein HU-beta OS=Pseudomonas aeruginosa (strain ATCC 15692 / PAO1 / 1C / PRS 101 / LMG 12228) GN=hupB PE=1 SV=3	1	1	1	1	15.6	15.6	15.6	9.0865	90	90	0	7.2349	61025000	2				23	71	TRUE	73	130;131;132	279;280;281	281
sp|P08280|RECA_PSEAE	sp|P08280|RECA_PSEAE	1	1	1	>sp|P08280|RECA_PSEAE Protein RecA OS=Pseudomonas aeruginosa (strain ATCC 15692 / PAO1 / 1C / PRS 101 / LMG 12228) GN=recA PE=3 SV=1	1	1	1	1	5.2	5.2	5.2	36.879	346	346	0	9.1563	4504800	4				24	844	TRUE	855	1486;1487	2850;2851;2852;2853	2851
sp|P08308|OTCC_PSEAE	sp|P08308|OTCC_PSEAE	9	9	9	>sp|P08308|OTCC_PSEAE Ornithine carbamoyltransferase, catabolic OS=Pseudomonas aeruginosa (strain ATCC 15692 / PAO1 / 1C / PRS 101 / LMG 12228) GN=arcB PE=1 SV=3	1	9	9	9	29.2	29.2	29.2	38.108	336	336	0	59.908	292300000	39				25	249;278;333;453;646;722;742;753;1111	True;True;True;True;True;True;True;True;True	252;281;337;458;653;733;753;764;1124	423;424;470;471;562;563;758;759;1124;1125;1264;1265;1320;1321;1340;1341;1975;1976	865;866;943;944;945;946;947;948;949;950;951;952;953;954;955;956;1085;1086;1434;1435;1436;1437;2171;2172;2453;2454;2455;2456;2568;2569;2599;2600;2601;2602;2603;3888;3889;3890;3891	866;947;1086;1437;2171;2454;2568;2600;3890
sp|P09591|EFTU_PSEAE	sp|P09591|EFTU_PSEAE	21	21	21	>sp|P09591|EFTU_PSEAE Elongation factor Tu OS=Pseudomonas aeruginosa (strain ATCC 15692 / PAO1 / 1C / PRS 101 / LMG 12228) GN=tufA PE=1 SV=2	1	21	21	21	61.2	61.2	61.2	43.369	397	397	0	199.32	1984100000	239				26	20;37;42;61;172;187;188;231;285;356;400;408;656;657;718;745;795;796;932;934;940	True;True;True;True;True;True;True;True;True;True;True;True;True;True;True;True;True;True;True;True;True	20;37;42;62;63;174;189;190;191;234;288;360;405;413;663;664;665;728;729;756;806;807;945;947;953	37;38;39;40;66;67;74;75;106;107;108;109;110;111;112;113;289;290;315;316;317;318;319;320;321;322;323;324;394;481;604;605;606;607;676;677;678;679;689;1138;1139;1140;1141;1142;1143;1253;1254;1255;1256;1257;1258;1259;1326;1327;1407;1408;1409;1410;1652;1654;1655;1663	87;88;89;90;91;92;135;136;137;138;147;148;149;150;151;152;153;154;155;156;157;158;159;160;161;162;163;164;165;166;167;228;229;230;231;232;233;234;235;236;237;238;239;240;241;242;243;244;245;246;247;248;249;250;251;556;557;612;613;614;615;616;617;618;619;620;621;622;623;624;625;626;627;628;629;630;631;632;633;634;635;636;637;638;639;640;641;642;643;644;645;646;647;648;649;650;651;652;653;654;655;6…	87;135;148;237;556;655;662;813;966;1155;1301;1324;2187;2210;2447;2575;2729;2740;3249;3257;3269	0;1;2;3;4;5	140;152;177;216;362;372
sp|P11221|OPRI_PSEAE	sp|P11221|OPRI_PSEAE	2	2	2	>sp|P11221|OPRI_PSEAE Major outer membrane lipoprotein OS=Pseudomonas aeruginosa (strain ATCC 15692 / PAO1 / 1C / PRS 101 / LMG 12228) GN=oprI PE=3 SV=1	1	2	2	2	25.3	25.3	25.3	8.8348	83	83	0	15.833	9142300	7				27	508;643	True;True	515;650	865;1120	1704;1705;2162;2163;2164;2165;2166	1705;2163
sp|P11436|AMIE_PSEAE	sp|P11436|AMIE_PSEAE	2	2	2	>sp|P11436|AMIE_PSEAE Aliphatic amidase OS=Pseudomonas aeruginosa (strain ATCC 15692 / PAO1 / 1C / PRS 101 / LMG 12228) GN=amiE PE=1 SV=2	1	2	2	2	9.2	9.2	9.2	38.494	346	346	0	12.389	4955700	2				28	401;510	True;True	406;517	680;870	1312;1714	1312;1714
sp|P13794|PORF_PSEAE	sp|P13794|PORF_PSEAE	5	5	5	>sp|P13794|PORF_PSEAE Outer membrane porin F OS=Pseudomonas aeruginosa (strain ATCC 15692 / PAO1 / 1C / PRS 101 / LMG 12228) GN=oprF PE=1 SV=1	1	5	5	5	19.7	19.7	19.7	37.639	350	350	0	45.663	82648000	25				29	201;798;806;963;1018	True;True;True;True;True	204;809;817;976;1031	343;344;1413;1414;1423;1703;1704;1801;1802;1803	710;711;712;713;714;2747;2748;2749;2750;2760;2761;3354;3355;3356;3357;3358;3359;3517;3518;3519;3520;3521;3522;3523;3524	711;2750;2760;3354;3521
sp|P13981|ARCA_PSEAE	sp|P13981|ARCA_PSEAE	22	22	22	>sp|P13981|ARCA_PSEAE Arginine deiminase OS=Pseudomonas aeruginosa (strain ATCC 15692 / PAO1 / 1C / PRS 101 / LMG 12228) GN=arcA PE=1 SV=2	1	22	22	22	52.6	52.6	52.6	46.435	418	418	0	267.91	2560600000	238				30	55;180;191;236;262;274;349;489;509;511;512;531;636;760;770;778;805;868;890;891;995;1052	True;True;True;True;True;True;True;True;True;True;True;True;True;True;True;True;True;True;True;True;True;True	56;182;194;239;265;277;353;494;516;518;519;538;643;771;781;789;816;880;902;903;1008;1065	97;98;301;302;327;328;402;403;445;446;462;463;464;465;592;593;594;595;833;834;866;867;868;869;871;872;873;874;875;876;877;911;912;1106;1354;1355;1369;1370;1381;1382;1383;1421;1422;1533;1534;1577;1578;1579;1580;1581;1582;1583;1584;1585;1586;1587;1588;1589;1590;1591;1592;1593;1759;1861;1862	211;212;213;214;215;216;217;578;579;580;581;582;583;584;585;586;587;588;589;678;679;680;681;682;683;684;824;825;826;827;828;829;896;897;898;899;900;920;921;922;923;924;925;926;927;928;929;930;931;932;933;934;935;936;937;1133;1134;1135;1136;1137;1138;1139;1140;1141;1142;1143;1144;1648;1649;1650;1651;1652;1653;1654;1655;1656;1706;1707;1708;1709;1710;1711;1712;1713;1715;1716;1717;1718;1719;1720;1721…	212;585;683;825;898;927;1136;1648;1709;1716;1726;1802;2135;2631;2662;2688;2759;2974;3078;3142;3444;3641
sp|P13982|ARCC_PSEAE	sp|P13982|ARCC_PSEAE	4	4	4	>sp|P13982|ARCC_PSEAE Carbamate kinase OS=Pseudomonas aeruginosa (strain ATCC 15692 / PAO1 / 1C / PRS 101 / LMG 12228) GN=arcC PE=3 SV=1	1	4	4	4	16.8	16.8	16.8	33.08	310	310	0	23.995	31812000	5				31	59;167;503;572	True;True;True;True	60;169;510;579	103;104;277;278;857;979	225;226;522;523;1688;1910	226;522;1688;1910
sp|P14165|CISY_PSEAE	sp|P14165|CISY_PSEAE	7	7	7	>sp|P14165|CISY_PSEAE Citrate synthase OS=Pseudomonas aeruginosa (strain ATCC 15692 / PAO1 / 1C / PRS 101 / LMG 12228) GN=gltA PE=3 SV=2	1	7	7	7	25.9	25.9	25.9	47.694	428	428	0	43.313	46069000	13				32	62;328;399;533;694;709;751	True;True;True;True;True;True;True	64;332;404;540;703;718;762	114;115;554;675;914;1211;1236;1237;1338	252;253;254;255;256;1075;1285;1804;2354;2355;2396;2397;2597	252;1075;1285;1804;2355;2396;2597
sp|P15276|ALGP_PSEAE	sp|P15276|ALGP_PSEAE	1	1	1	>sp|P15276|ALGP_PSEAE Transcriptional regulatory protein AlgP OS=Pseudomonas aeruginosa (strain ATCC 15692 / PAO1 / 1C / PRS 101 / LMG 12228) GN=algP PE=4 SV=2	1	1	1	1	4	4	4	34.49	352	352	0	9.0099	4303200	2				33	265	TRUE	268	450	906;907	906
sp|P29365|DHOM_PSEAE	sp|P29365|DHOM_PSEAE	2	2	2	>sp|P29365|DHOM_PSEAE Homoserine dehydrogenase OS=Pseudomonas aeruginosa (strain ATCC 15692 / PAO1 / 1C / PRS 101 / LMG 12228) GN=hom PE=3 SV=2	1	2	2	2	5.8	5.8	5.8	46.223	434	434	0	10.996	3568400	1				34	351;648	True;True	355;655	598;1127	1148;2174	1148;2174
sp|P30718|CH60_PSEAE	sp|P30718|CH60_PSEAE	21	21	21	>sp|P30718|CH60_PSEAE 60 kDa chaperonin OS=Pseudomonas aeruginosa (strain ATCC 15692 / PAO1 / 1C / PRS 101 / LMG 12228) GN=groL PE=1 SV=3	1	21	21	21	54.5	54.5	54.5	57.085	547	547	0	167.67	558590000	80				35	9;51;93;94;105;106;110;142;185;256;286;398;520;532;703;782;783;785;821;964;973	True;True;True;True;True;True;True;True;True;True;True;True;True;True;True;True;True;True;True;True;True	9;51;52;95;96;107;108;112;144;187;259;289;403;527;539;712;793;794;796;832;977;986	15;16;88;89;90;161;162;163;178;179;180;184;185;186;187;238;239;309;310;435;436;482;483;673;674;894;913;1226;1227;1387;1388;1389;1392;1393;1450;1451;1705;1720;1721	43;44;45;46;47;48;49;50;51;191;192;193;194;195;196;197;198;199;200;201;202;203;335;336;337;358;359;360;361;362;363;364;365;370;371;372;373;374;375;376;377;378;379;380;381;382;383;462;463;598;599;884;885;967;968;1281;1282;1283;1284;1763;1803;2377;2378;2379;2380;2381;2382;2383;2696;2697;2698;2701;2702;2703;2803;2804;3360;3377;3378;3379	44;199;335;337;362;365;382;463;599;884;968;1282;1763;1803;2382;2696;2698;2701;2803;3360;3379	6	267
sp|P37798|ACCC_PSEAE	sp|P37798|ACCC_PSEAE	10	10	10	>sp|P37798|ACCC_PSEAE Biotin carboxylase OS=Pseudomonas aeruginosa (strain ATCC 15692 / PAO1 / 1C / PRS 101 / LMG 12228) GN=accC PE=1 SV=1	1	10	10	10	32.1	32.1	32.1	48.887	449	449	0	84.794	141880000	21				36	56;270;315;726;823;882;990;994;1034;1062	True;True;True;True;True;True;True;True;True;True	57;273;319;737;834;894;1003;1007;1047;1075	99;457;533;1293;1294;1453;1454;1560;1561;1750;1751;1757;1758;1832;1876;1877	218;915;1050;2532;2533;2807;2808;3048;3049;3050;3051;3431;3432;3441;3442;3443;3580;3659;3660;3661;3662	218;915;1050;2532;2808;3049;3431;3443;3580;3661
sp|P37799|BCCP_PSEAE	sp|P37799|BCCP_PSEAE	8	8	8	>sp|P37799|BCCP_PSEAE Biotin carboxyl carrier protein of acetyl-CoA carboxylase OS=Pseudomonas aeruginosa (strain ATCC 15692 / PAO1 / 1C / PRS 101 / LMG 12228) GN=accB PE=3 SV=1	1	8	8	8	62.2	62.2	62.2	16.455	156	156	0	96.998	1893300000	119				37	8;515;516;587;588;618;848;872	True;True;True;True;True;True;True;True	8;522;523;594;595;625;859;860;884	13;14;883;884;885;886;887;888;889;890;1011;1012;1013;1014;1015;1016;1017;1018;1019;1020;1021;1022;1023;1024;1025;1026;1079;1492;1493;1494;1495;1539;1540;1541;1542;1543	25;26;27;28;29;30;31;32;33;34;35;36;37;38;39;40;41;42;1740;1741;1742;1743;1744;1745;1746;1747;1748;1749;1750;1751;1752;1753;1754;1755;1756;1757;1969;1970;1971;1972;1973;1974;1975;1976;1977;1978;1979;1980;1981;1982;1983;1984;1985;1986;1987;1988;1989;1990;1991;1992;1993;1994;1995;1996;1997;1998;1999;2000;2096;2860;2861;2862;2863;2864;2865;2866;2867;2868;2869;2870;2871;2872;2873;2874;2875;2876;2877;…	26;1750;1755;1988;1995;2096;2864;3000	7	87
sp|P38100|CARB_PSEAE	sp|P38100|CARB_PSEAE	8	8	8	>sp|P38100|CARB_PSEAE Carbamoyl-phosphate synthase large chain OS=Pseudomonas aeruginosa (strain ATCC 15692 / PAO1 / 1C / PRS 101 / LMG 12228) GN=carB PE=3 SV=3	1	8	8	8	10.4	10.4	10.4	117.33	1073	1073	0	69.004	50805000	15				38	216;386;545;717;862;908;917;1063	True;True;True;True;True;True;True;True	219;391;552;727;874;920;929;1076	371;372;654;934;935;1252;1525;1616;1631;1632;1878	771;772;773;774;775;776;1249;1827;1828;2424;2960;3181;3213;3214;3215;3663	772;1249;1828;2424;2960;3181;3215;3663
sp|P43336|PHHC_PSEAE	sp|P43336|PHHC_PSEAE	4	4	4	>sp|P43336|PHHC_PSEAE Aromatic-amino-acid aminotransferase OS=Pseudomonas aeruginosa (strain ATCC 15692 / PAO1 / 1C / PRS 101 / LMG 12228) GN=phhC PE=3 SV=2	1	4	4	4	15	15	15	43.273	399	399	0	32.546	48909000	9				39	12;437;529;1026	True;True;True;True	12;442;536;1039	22;23;732;907;908;1817;1818	58;59;1399;1793;1794;1795;3555;3556;3557	58;1399;1795;3556
sp|P47203|FTSA_PSEAE	sp|P47203|FTSA_PSEAE	3	3	3	>sp|P47203|FTSA_PSEAE Cell division protein FtsA OS=Pseudomonas aeruginosa (strain ATCC 15692 / PAO1 / 1C / PRS 101 / LMG 12228) GN=ftsA PE=3 SV=2	1	3	3	3	9.4	9.4	9.4	44.646	417	417	0	17.923	5152800	4				40	921;1002;1087	True;True;True	933;1015;1100	1637;1771;1918	3228;3229;3479;3720	3228;3479;3720
sp|P47204|FTSZ_PSEAE	sp|P47204|FTSZ_PSEAE	3	3	3	>sp|P47204|FTSZ_PSEAE Cell division protein FtsZ OS=Pseudomonas aeruginosa (strain ATCC 15692 / PAO1 / 1C / PRS 101 / LMG 12228) GN=ftsZ PE=1 SV=2	1	3	3	3	10.7	10.7	10.7	41.218	394	394	0	27.487	5725600	5				41	363;941;1049	True;True;True	367;954;1062	618;1664;1857;1858	1183;3270;3627;3628;3629	1183;3270;3627
sp|P48247|GSA_PSEAE	sp|P48247|GSA_PSEAE	4	4	4	>sp|P48247|GSA_PSEAE Glutamate-1-semialdehyde 2,1-aminomutase OS=Pseudomonas aeruginosa (strain ATCC 15692 / PAO1 / 1C / PRS 101 / LMG 12228) GN=hemL PE=1 SV=2	1	4	4	4	15.2	15.2	15.2	45.397	427	427	0	37.643	39761000	8				42	52;695;716;956	True;True;True;True	53;704;726;969	91;92;1212;1250;1251;1687	204;205;206;2356;2422;2423;3301;3302	206;2356;2422;3301
sp|P50987|ARLY_PSEAE	sp|P50987|ARLY_PSEAE	1	1	1	>sp|P50987|ARLY_PSEAE Argininosuccinate lyase OS=Pseudomonas aeruginosa (strain ATCC 15692 / PAO1 / 1C / PRS 101 / LMG 12228) GN=argH PE=3 SV=2	1	1	1	1	2.8	2.8	2.8	51.64	464	464	0	13.792	7456700	2				43	971	TRUE	984	1716;1717	3372;3373	3373
sp|P53593|SUCC_PSEAE	sp|P53593|SUCC_PSEAE	15	15	15	>sp|P53593|SUCC_PSEAE Succinyl-CoA ligase [ADP-forming] subunit beta OS=Pseudomonas aeruginosa (strain ATCC 15692 / PAO1 / 1C / PRS 101 / LMG 12228) GN=sucC PE=3 SV=2	1	15	15	15	43	43	43	41.542	388	388	0	161.18	575470000	74				44	35;151;241;434;446;472;473;557;562;563;750;766;781;788;1000	True;True;True;True;True;True;True;True;True;True;True;True;True;True;True	35;153;244;439;451;477;478;564;569;570;761;777;792;799;1013	62;63;253;254;410;727;728;744;745;788;789;790;950;951;959;960;961;962;1336;1337;1363;1386;1396;1397;1765;1766;1767;1768	127;128;129;130;131;486;487;488;840;1389;1390;1391;1412;1413;1483;1484;1485;1486;1487;1488;1489;1845;1846;1856;1857;1858;1859;1860;1861;1862;1863;1864;1865;2585;2586;2587;2588;2589;2590;2591;2592;2593;2594;2595;2596;2647;2694;2695;2709;2710;2711;2712;2713;2714;2715;3456;3457;3458;3459;3460;3461;3462;3463;3464;3465;3466;3467;3468;3469;3470;3471;3472;3473;3474;3475	128;486;840;1389;1413;1483;1489;1845;1857;1863;2586;2647;2695;2711;3457
sp|P53641|SODF_PSEAE	sp|P53641|SODF_PSEAE	2	2	2	>sp|P53641|SODF_PSEAE Superoxide dismutase [Fe] OS=Pseudomonas aeruginosa (strain ATCC 15692 / PAO1 / 1C / PRS 101 / LMG 12228) GN=sodB PE=3 SV=3	1	2	2	2	13.5	13.5	13.5	21.351	193	193	0	12.784	7830800	2				45	38;930	True;True	38;943	68;1649	139;3246	139;3246
sp|P57112|STHA_PSEAE	sp|P57112|STHA_PSEAE	4	4	4	>sp|P57112|STHA_PSEAE Soluble pyridine nucleotide transhydrogenase OS=Pseudomonas aeruginosa (strain ATCC 15692 / PAO1 / 1C / PRS 101 / LMG 12228) GN=sthA PE=1 SV=2	1	4	4	4	10.8	10.8	10.8	51.16	464	464	0	24.231	11401000	4				46	121;375;807;1066	True;True;True;True	123;379;818;1079	205;636;1424;1884	416;1210;2762;3673	416;1210;2762;3673
sp|P72173|AAT_PSEAE	sp|P72173|AAT_PSEAE	9	9	9	>sp|P72173|AAT_PSEAE Aspartate aminotransferase OS=Pseudomonas aeruginosa (strain ATCC 15692 / PAO1 / 1C / PRS 101 / LMG 12228) GN=aspC PE=3 SV=2	1	9	9	9	32.7	32.7	32.7	43.319	398	398	0	80.159	122780000	19				47	48;76;195;397;599;605;975;1060;1120	True;True;True;True;True;True;True;True;True	48;78;198;402;606;612;988;1073;1133	83;84;139;140;335;671;672;1046;1047;1056;1724;1725;1872;1873;1990	180;181;289;290;291;695;1277;1278;1279;1280;2037;2038;2049;2050;3383;3384;3654;3655;3931	181;290;695;1280;2037;2050;3383;3654;3931
sp|P77915|HEMN_PSEAE	sp|P77915|HEMN_PSEAE	4	4	4	>sp|P77915|HEMN_PSEAE Oxygen-independent coproporphyrinogen-III oxidase OS=Pseudomonas aeruginosa (strain ATCC 15692 / PAO1 / 1C / PRS 101 / LMG 12228) GN=hemN PE=2 SV=2	1	4	4	4	10.7	10.7	10.7	52.488	460	460	0	31.981	14151000	8				48	469;833;933;1042	True;True;True;True	474;844;946;1055	783;1470;1471;1653;1845;1846	1477;2827;2828;2829;3250;3609;3610;3611	1477;2829;3250;3610
sp|Q51342|PUR1_PSEAE	sp|Q51342|PUR1_PSEAE	3	3	3	>sp|Q51342|PUR1_PSEAE Amidophosphoribosyltransferase OS=Pseudomonas aeruginosa (strain ATCC 15692 / PAO1 / 1C / PRS 101 / LMG 12228) GN=purF PE=3 SV=3	1	3	3	3	6.8	6.8	6.8	55.369	501	501	0	17.237	31382000	6				49	238;845;871	True;True;True	241;856;883	407;1488;1489;1538	837;2854;2855;2856;2857;2984	837;2854;2984
sp|Q51422|SYDND_PSEAE	sp|Q51422|SYDND_PSEAE	5	5	5	>sp|Q51422|SYDND_PSEAE Aspartate--tRNA(Asp/Asn) ligase OS=Pseudomonas aeruginosa (strain ATCC 15692 / PAO1 / 1C / PRS 101 / LMG 12228) GN=aspS PE=1 SV=2	1	5	5	5	12.2	12.2	12.2	66.207	591	591	0	51.407	37487000	11				50	160;290;479;926;976	True;True;True;True;True	162;293;484;938;939;989	266;267;490;820;821;1642;1643;1644;1726;1727	506;507;508;975;1631;1632;3238;3239;3240;3385;3386	507;975;1631;3238;3386	8	565
sp|Q51561|RPOB_PSEAE	sp|Q51561|RPOB_PSEAE	33	33	33	>sp|Q51561|RPOB_PSEAE DNA-directed RNA polymerase subunit beta OS=Pseudomonas aeruginosa (strain ATCC 15692 / PAO1 / 1C / PRS 101 / LMG 12228) GN=rpoB PE=3 SV=2	1	33	33	33	37.7	37.7	37.7	150.84	1357	1357	0	265.37	600820000	98				51	57;79;115;175;198;206;222;224;329;343;376;383;391;393;418;499;527;624;635;639;677;683;705;797;847;855;861;884;897;951;1038;1088;1094	True;True;True;True;True;True;True;True;True;True;True;True;True;True;True;True;True;True;True;True;True;True;True;True;True;True;True;True;True;True;True;True;True	58;81;117;177;201;209;225;227;333;347;380;388;396;398;423;506;534;631;642;646;686;692;714;808;858;867;873;896;909;964;1051;1101;1107	100;101;143;144;194;195;294;340;352;353;379;382;383;555;556;579;580;637;649;662;665;666;701;702;851;852;904;905;1088;1104;1105;1113;1114;1181;1182;1190;1191;1230;1231;1411;1412;1491;1505;1506;1523;1524;1563;1564;1599;1600;1678;1838;1839;1919;1920;1947;1948	219;220;221;222;294;295;296;297;298;299;300;301;302;303;304;305;306;395;396;397;564;707;728;729;730;731;784;787;788;789;1076;1077;1112;1113;1114;1211;1239;1240;1265;1270;1271;1272;1339;1340;1341;1681;1682;1789;1790;1791;2108;2109;2130;2131;2132;2133;2146;2147;2148;2149;2309;2310;2311;2321;2322;2323;2387;2388;2389;2741;2742;2743;2744;2745;2746;2859;2895;2896;2897;2898;2899;2956;2957;2958;2959;3053…	219;303;395;564;707;730;784;788;1076;1113;1211;1239;1265;1270;1339;1681;1791;2109;2132;2148;2309;2323;2387;2741;2859;2895;2958;3055;3157;3290;3601;3721;3839
sp|Q51567|SUCD_PSEAE	sp|Q51567|SUCD_PSEAE	3	3	3	>sp|Q51567|SUCD_PSEAE Succinyl-CoA ligase [ADP-forming] subunit alpha OS=Pseudomonas aeruginosa (strain ATCC 15692 / PAO1 / 1C / PRS 101 / LMG 12228) GN=sucD PE=3 SV=2	1	3	3	3	10.5	10.5	10.5	30.266	295	295	0	21.438	58213000	9				52	70;275;826	True;True;True	72;278;837	128;129;466;467;1458;1459	275;276;277;278;938;939;940;2813;2814	278;939;2813
sp|Q59637|ODP1_PSEAE	sp|Q59637|ODP1_PSEAE	20	20	20	>sp|Q59637|ODP1_PSEAE Pyruvate dehydrogenase E1 component OS=Pseudomonas aeruginosa (strain ATCC 15692 / PAO1 / 1C / PRS 101 / LMG 12228) GN=aceE PE=3 SV=2	1	20	20	20	26.1	26.1	26.1	99.563	882	882	0	136.96	271670000	52				53	176;184;199;235;312;374;407;448;483;502;669;681;707;732;827;842;889;1006;1064;1078	True;True;True;True;True;True;True;True;True;True;True;True;True;True;True;True;True;True;True;True	178;186;202;238;316;378;412;453;488;509;677;690;716;743;838;853;901;1019;1077;1091	295;308;341;400;401;529;530;635;687;688;747;748;826;827;855;856;1165;1186;1187;1233;1234;1302;1303;1460;1461;1482;1483;1575;1576;1777;1778;1879;1880;1904;1905	565;597;708;820;821;822;823;1044;1045;1046;1047;1209;1322;1323;1415;1416;1417;1637;1638;1639;1640;1641;1685;1686;1687;2250;2315;2316;2317;2391;2392;2393;2394;2543;2544;2545;2815;2816;2817;2842;2843;2844;2845;2846;3074;3075;3486;3487;3664;3665;3666;3702;3703	565;597;708;822;1047;1209;1323;1415;1637;1686;2250;2316;2393;2545;2816;2846;3075;3487;3664;3703
sp|Q59638|ODP2_PSEAE	sp|Q59638|ODP2_PSEAE	10	10	10	>sp|Q59638|ODP2_PSEAE Dihydrolipoyllysine-residue acetyltransferase component of pyruvate dehydrogenase complex OS=Pseudomonas aeruginosa (strain ATCC 15692 / PAO1 / 1C / PRS 101 / LMG 12228) GN=aceF PE=2 SV=2	1	10	10	10	19.2	19.2	19.2	56.708	547	547	0	61.98	60431000	15				54	21;137;250;289;463;570;612;651;837;838	True;True;True;True;True;True;True;True;True;True	21;139;253;292;468;577;619;658;848;849	41;230;425;426;488;489;773;976;977;1068;1069;1130;1131;1476;1477	93;450;867;868;869;973;974;1453;1907;1908;2078;2079;2080;2177;2178;2835;2836	93;450;868;973;1453;1907;2078;2178;2835;2836
sp|Q9HT14|ATP6_PSEAE	sp|Q9HT14|ATP6_PSEAE	1	1	1	>sp|Q9HT14|ATP6_PSEAE ATP synthase subunit a OS=Pseudomonas aeruginosa (strain ATCC 15692 / PAO1 / 1C / PRS 101 / LMG 12228) GN=atpB PE=3 SV=1	1	1	1	1	5.5	5.5	5.5	31.92	289	289	0.0042918	5.6599	3712100	2				55	629	TRUE	636	1095	2119;2120	2120
sp|Q9HT16|ATPF_PSEAE	sp|Q9HT16|ATPF_PSEAE	3	3	3	>sp|Q9HT16|ATPF_PSEAE ATP synthase subunit b OS=Pseudomonas aeruginosa (strain ATCC 15692 / PAO1 / 1C / PRS 101 / LMG 12228) GN=atpF PE=3 SV=1	1	3	3	3	21.8	21.8	21.8	16.956	156	156	0	21.465	8861800	5				56	118;124;411	True;True;True	120;126;416	200;201;208;692	407;408;409;422;1327	409;422;1327
sp|Q9HT18|ATPA_PSEAE	sp|Q9HT18|ATPA_PSEAE	12	12	12	>sp|Q9HT18|ATPA_PSEAE ATP synthase subunit alpha OS=Pseudomonas aeruginosa (strain ATCC 15692 / PAO1 / 1C / PRS 101 / LMG 12228) GN=atpA PE=3 SV=1	1	12	12	12	28.8	28.8	28.8	55.393	514	514	0	92.735	261840000	43				57	215;240;334;459;733;784;859;860;875;960;985;1048	True;True;True;True;True;True;True;True;True;True;True;True	218;243;338;464;744;795;871;872;887;973;998;1061	369;370;409;564;565;766;767;1304;1305;1390;1391;1518;1519;1520;1521;1522;1547;1548;1694;1695;1742;1743;1855;1856	768;769;770;839;1087;1088;1089;1090;1445;1446;1447;2546;2547;2699;2700;2946;2947;2948;2949;2950;2951;2952;2953;2954;2955;3016;3017;3018;3317;3318;3414;3415;3416;3417;3418;3419;3420;3421;3622;3623;3624;3625;3626	768;839;1087;1447;2546;2700;2947;2955;3018;3318;3419;3624
sp|Q9HT19|ATPG_PSEAE	sp|Q9HT19|ATPG_PSEAE	1	1	1	>sp|Q9HT19|ATPG_PSEAE ATP synthase gamma chain OS=Pseudomonas aeruginosa (strain ATCC 15692 / PAO1 / 1C / PRS 101 / LMG 12228) GN=atpG PE=3 SV=1	1	1	1	1	6.6	6.6	6.6	31.553	286	286	0	18.421	15299000	4				58	730	TRUE	741	1299;1300	2538;2539;2540;2541	2540
sp|Q9HT20|ATPB_PSEAE	sp|Q9HT20|ATPB_PSEAE	10	10	10	>sp|Q9HT20|ATPB_PSEAE ATP synthase subunit beta OS=Pseudomonas aeruginosa (strain ATCC 15692 / PAO1 / 1C / PRS 101 / LMG 12228) GN=atpD PE=3 SV=1	1	10	10	10	29.9	29.9	29.9	49.499	458	458	0	78.505	79986000	21				59	183;200;299;389;786;830;958;959;980;1118	True;True;True;True;True;True;True;True;True;True	185;203;302;394;797;841;971;972;993;1131	307;342;503;659;1394;1466;1467;1690;1691;1692;1693;1733;1986;1987	595;596;709;996;1261;2704;2705;2706;2823;2824;3310;3311;3312;3313;3314;3315;3316;3403;3903;3904;3905	596;709;996;1261;2704;2824;3311;3316;3403;3905
sp|Q9HT21|ATPE_PSEAE	sp|Q9HT21|ATPE_PSEAE	1	1	1	>sp|Q9HT21|ATPE_PSEAE ATP synthase epsilon chain OS=Pseudomonas aeruginosa (strain ATCC 15692 / PAO1 / 1C / PRS 101 / LMG 12228) GN=atpC PE=3 SV=1	1	1	1	1	6.4	6.4	6.4	14.726	141	141	0	6.1548	0	1				60	528	TRUE	535	906	1792	1792
sp|Q9HT95|ATSE4_PSEAE	sp|Q9HT95|ATSE4_PSEAE	2	2	2	>sp|Q9HT95|ATSE4_PSEAE Acetyltransferase PA5475 OS=Pseudomonas aeruginosa (strain ATCC 15692 / PAO1 / 1C / PRS 101 / LMG 12228) GN=PA5475 PE=3 SV=1	1	2	2	2	11.8	11.8	11.8	21	186	186	0	15.922	6074000	5				61	194;791	True;True	197;802	333;334;1401;1402	692;693;694;2720;2721	693;2720
sp|Q9HTD7|ASPA_PSEAE	sp|Q9HTD7|ASPA_PSEAE	2	2	2	>sp|Q9HTD7|ASPA_PSEAE Aspartate ammonia-lyase OS=Pseudomonas aeruginosa (strain ATCC 15692 / PAO1 / 1C / PRS 101 / LMG 12228) GN=aspA PE=3 SV=1	1	2	2	2	12.2	12.2	12.2	51.069	474	474	0	12.735	4361100	5				62	525;580	True;True	532;587	902;1001	1786;1787;1956;1957;1958	1786;1956
sp|Q9HTF1|LTAE_PSEAE	sp|Q9HTF1|LTAE_PSEAE	2	2	2	>sp|Q9HTF1|LTAE_PSEAE Low specificity L-threonine aldolase OS=Pseudomonas aeruginosa (strain ATCC 15692 / PAO1 / 1C / PRS 101 / LMG 12228) GN=ltaE PE=3 SV=1	1	2	2	2	7.8	7.8	7.8	38.213	346	346	0	16.385	13089000	5				63	294;601	True;True	297;608	496;497;1050	981;982;983;984;2041	982;2041
sp|Q9HTN8|RL28_PSEAE	sp|Q9HTN8|RL28_PSEAE	1	1	1	>sp|Q9HTN8|RL28_PSEAE 50S ribosomal protein L28 OS=Pseudomonas aeruginosa (strain ATCC 15692 / PAO1 / 1C / PRS 101 / LMG 12228) GN=rpmB PE=3 SV=1	1	1	1	1	12.8	12.8	12.8	9.0655	78	78	0	7.3246	13136000	3				64	350	TRUE	354	596;597	1145;1146;1147	1146
sp|Q9HTQ0|DADA1_PSEAE	sp|Q9HTQ0|DADA1_PSEAE	7	7	7	>sp|Q9HTQ0|DADA1_PSEAE D-amino acid dehydrogenase 1 OS=Pseudomonas aeruginosa (strain ATCC 15692 / PAO1 / 1C / PRS 101 / LMG 12228) GN=dadA1 PE=1 SV=1	1	7	7	7	20.6	20.6	20.6	47.139	432	432	0	53.118	58363000	16				65	31;649;828;909;923;1013;1109	True;True;True;True;True;True;True	31;656;839;921;935;1026;1122	55;56;1128;1462;1463;1617;1618;1639;1790;1791;1972	112;113;2175;2818;2819;3182;3183;3184;3231;3232;3503;3504;3505;3506;3507;3883	113;2175;2819;3183;3232;3507;3883
sp|Q9HTQ2|ALR2_PSEAE	sp|Q9HTQ2|ALR2_PSEAE	1	1	1	>sp|Q9HTQ2|ALR2_PSEAE Alanine racemase, catabolic OS=Pseudomonas aeruginosa (strain ATCC 15692 / PAO1 / 1C / PRS 101 / LMG 12228) GN=dadX PE=1 SV=1	1	1	1	1	3.9	3.9	3.9	38.914	357	357	0	5.8203	3470500	1				66	979	TRUE	992	1732	3402	3402
sp|Q9HTV1|RHO_PSEAE	sp|Q9HTV1|RHO_PSEAE	2	2	2	>sp|Q9HTV1|RHO_PSEAE Transcription termination factor Rho OS=Pseudomonas aeruginosa (strain ATCC 15692 / PAO1 / 1C / PRS 101 / LMG 12228) GN=rho PE=3 SV=1	1	2	2	2	6.7	6.7	6.7	47.069	419	419	0	19.329	25221000	4				67	460;684	True;True	465;693	768;769;1192;1193	1448;1449;2324;2325	1448;2325
sp|Q9HTZ7|PCKA_PSEAE	sp|Q9HTZ7|PCKA_PSEAE	2	2	2	>sp|Q9HTZ7|PCKA_PSEAE Phosphoenolpyruvate carboxykinase [ATP] OS=Pseudomonas aeruginosa (strain ATCC 15692 / PAO1 / 1C / PRS 101 / LMG 12228) GN=pckA PE=3 SV=1	1	2	2	2	5.1	5.1	5.1	55.731	513	513	0	11.011	6869900	1				68	103;156	True;True	105;158	174;260	354;494	354;494
sp|Q9HU21|RMLC_PSEAE	sp|Q9HU21|RMLC_PSEAE	1	1	1	>sp|Q9HU21|RMLC_PSEAE dTDP-4-dehydrorhamnose 3,5-epimerase OS=Pseudomonas aeruginosa (strain ATCC 15692 / PAO1 / 1C / PRS 101 / LMG 12228) GN=rmlC PE=1 SV=1	1	1	1	1	6.6	6.6	6.6	20.766	181	181	0	6.5543	13969000	3				69	534	TRUE	541	915;916	1805;1806;1807	1805
sp|Q9HU65|GLNA_PSEAE	sp|Q9HU65|GLNA_PSEAE	9	9	9	>sp|Q9HU65|GLNA_PSEAE Glutamine synthetase OS=Pseudomonas aeruginosa (strain ATCC 15692 / PAO1 / 1C / PRS 101 / LMG 12228) GN=glnA PE=1 SV=1	1	9	9	9	24.5	24.5	24.5	51.944	469	469	0	91.515	137870000	49				70	88;89;165;179;306;482;664;685;759	True;True;True;True;True;True;True;True;True	90;91;167;181;309;310;487;672;694;770	155;156;157;274;299;300;515;516;517;518;519;520;824;825;1156;1157;1194;1195;1350;1351;1352;1353	324;325;326;327;328;517;575;576;577;1013;1014;1015;1016;1017;1018;1019;1020;1021;1022;1023;1024;1025;1026;1027;1028;1029;1030;1031;1032;1033;1635;1636;2234;2235;2236;2326;2327;2618;2619;2620;2621;2622;2623;2624;2625;2626;2627;2628;2629	324;327;517;577;1020;1636;2235;2326;2625	9	377
sp|Q9HUM0|HFQ_PSEAE	sp|Q9HUM0|HFQ_PSEAE	1	1	1	>sp|Q9HUM0|HFQ_PSEAE RNA-binding protein Hfq OS=Pseudomonas aeruginosa (strain ATCC 15692 / PAO1 / 1C / PRS 101 / LMG 12228) GN=hfq PE=1 SV=1	1	1	1	1	15.9	15.9	15.9	9.1034	82	82	0.0043478	5.6968	1817500	2				71	630	TRUE	637	1096;1097	2121;2122	2121
sp|Q9HUM6|PURA_PSEAE	sp|Q9HUM6|PURA_PSEAE	2	2	2	>sp|Q9HUM6|PURA_PSEAE Adenylosuccinate synthetase OS=Pseudomonas aeruginosa (strain ATCC 15692 / PAO1 / 1C / PRS 101 / LMG 12228) GN=purA PE=3 SV=1	1	2	2	2	7	7	7	46.814	430	430	0	20.238	9930100	1				72	906;986	True;True	918;999	1613;1614;1744	3178;3179;3422	3179;3422
sp|Q9HV43|DNAK_PSEAE	sp|Q9HV43|DNAK_PSEAE	4	4	4	>sp|Q9HV43|DNAK_PSEAE Chaperone protein DnaK OS=Pseudomonas aeruginosa (strain ATCC 15692 / PAO1 / 1C / PRS 101 / LMG 12228) GN=dnaK PE=3 SV=1	1	4	4	4	10.7	10.7	10.7	68.402	637	637	0	36.365	10990000	7				73	679;721;776;936	True;True;True;True	688;732;787;949	1184;1262;1263;1378;1658	2313;2450;2451;2452;2677;2678;3263;3264	2313;2450;2677;3263
sp|Q9HV50|GLMM_PSEAE	sp|Q9HV50|GLMM_PSEAE	1	1	1	>sp|Q9HV50|GLMM_PSEAE Phosphoglucosamine mutase OS=Pseudomonas aeruginosa (strain ATCC 15692 / PAO1 / 1C / PRS 101 / LMG 12228) GN=glmM PE=3 SV=1	1	1	1	1	2.9	2.9	2.9	47.796	445	445	0	6.7001	12599000	3				74	978	TRUE	991	1730;1731	3399;3400;3401	3400
sp|Q9HV59|PNP_PSEAE	sp|Q9HV59|PNP_PSEAE	7	7	7	>sp|Q9HV59|PNP_PSEAE Polyribonucleotide nucleotidyltransferase OS=Pseudomonas aeruginosa (strain ATCC 15692 / PAO1 / 1C / PRS 101 / LMG 12228) GN=pnp PE=3 SV=1	1	7	7	7	14.4	14.4	14.4	75.452	701	701	0	61.008	75812000	18				75	27;114;330;471;620;780;1012	True;True;True;True;True;True;True	27;116;334;476;627;791;1025	50;51;192;193;557;786;787;1081;1082;1385;1788;1789	106;107;108;390;391;392;393;394;1078;1480;1481;1482;2098;2099;2692;2693;3501;3502	107;390;1078;1480;2098;2693;3501
sp|Q9HVA2|ILVC_PSEAE	sp|Q9HVA2|ILVC_PSEAE	3	3	3	>sp|Q9HVA2|ILVC_PSEAE Ketol-acid reductoisomerase OS=Pseudomonas aeruginosa (strain ATCC 15692 / PAO1 / 1C / PRS 101 / LMG 12228) GN=ilvC PE=1 SV=1	1	3	3	3	11.8	11.8	11.8	36.424	338	338	0	25.529	39091000	8				76	17;107;340	True;True;True	17;109;344	30;31;181;575;576	67;68;366;1105;1106;1107;1108;1109	67;366;1106
sp|Q9HVC5|KPRS_PSEAE	sp|Q9HVC5|KPRS_PSEAE	3	3	3	>sp|Q9HVC5|KPRS_PSEAE Ribose-phosphate pyrophosphokinase OS=Pseudomonas aeruginosa (strain ATCC 15692 / PAO1 / 1C / PRS 101 / LMG 12228) GN=prs PE=3 SV=1	1	3	3	3	12.1	12.1	12.1	34.04	313	313	0	23.805	16973000	6				77	486;490;704	True;True;True	491;495;713	830;835;836;1228;1229	1644;1657;1658;2384;2385;2386	1644;1658;2384
sp|Q9HVF1|MQO2_PSEAE	sp|Q9HVF1|MQO2_PSEAE	2	2	2	>sp|Q9HVF1|MQO2_PSEAE Probable malate:quinone oxidoreductase 2 OS=Pseudomonas aeruginosa (strain ATCC 15692 / PAO1 / 1C / PRS 101 / LMG 12228) GN=mqo2 PE=3 SV=1	1	2	2	2	4.9	4.9	4.9	55.498	507	507	0	17.987	16728000	5				78	147;1110	True;True	149;1123	247;1973;1974	477;3884;3885;3886;3887	477;3885
sp|Q9HVI7|GLYA3_PSEAE;sp|Q9I138|GLYA2_PSEAE	sp|Q9HVI7|GLYA3_PSEAE;sp|Q9I138|GLYA2_PSEAE	2;1	2;1	2;1	>sp|Q9HVI7|GLYA3_PSEAE Serine hydroxymethyltransferase 3 OS=Pseudomonas aeruginosa (strain ATCC 15692 / PAO1 / 1C / PRS 101 / LMG 12228) GN=glyA2 PE=3 SV=1;>sp|Q9I138|GLYA2_PSEAE Serine hydroxymethyltransferase 2 OS=Pseudomonas aeruginosa (strain ATCC 1569	2	2	2	2	4.3	4.3	4.3	45.157	417	417;418	0	10.983	221190	2				79	440;846	True;True	445;857	736;1490	1404;2858	1404;2858
sp|Q9HVM4|SYI_PSEAE	sp|Q9HVM4|SYI_PSEAE	10	10	10	>sp|Q9HVM4|SYI_PSEAE Isoleucine--tRNA ligase OS=Pseudomonas aeruginosa (strain ATCC 15692 / PAO1 / 1C / PRS 101 / LMG 12228) GN=ileS PE=3 SV=1	1	10	10	10	14	14	14	105.46	943	943	0	75.347	86442000	17				80	73;136;272;313;322;584;799;835;914;1074	True;True;True;True;True;True;True;True;True;True	75;138;275;317;326;591;810;846;926;1087	134;229;459;460;531;544;545;1007;1008;1415;1473;1474;1624;1897;1898	283;449;917;918;1048;1065;1066;1965;1966;2751;2831;2832;2833;3194;3693;3694;3695;3696	283;449;918;1048;1065;1966;2751;2831;3194;3695
sp|Q9HVN5|CLPB_PSEAE	sp|Q9HVN5|CLPB_PSEAE	3	1	1	>sp|Q9HVN5|CLPB_PSEAE Chaperone protein ClpB OS=Pseudomonas aeruginosa (strain ATCC 15692 / PAO1 / 1C / PRS 101 / LMG 12228) GN=clpB PE=3 SV=1	1	3	1	1	4.1	1.4	1.4	95.004	854	854	0	9.7333	308070	3				81	33;754;874	True;False;False	33;765;886	59;60;1342;1343;1545;1546	123;124;125;2604;2605;3014;3015	123;2605;3014
sp|Q9HVT8|GATA_PSEAE	sp|Q9HVT8|GATA_PSEAE	2	2	2	>sp|Q9HVT8|GATA_PSEAE Glutamyl-tRNA(Gln) amidotransferase subunit A OS=Pseudomonas aeruginosa (strain ATCC 15692 / PAO1 / 1C / PRS 101 / LMG 12228) GN=gatA PE=1 SV=1	1	2	2	2	6	6	6	51.862	484	484	0	14.937	5547300	2				82	410;1027	True;True	415;1040	691;1819;1820	1326;3558;3559	1326;3559
sp|Q9HVY3|RS9_PSEAE	sp|Q9HVY3|RS9_PSEAE	1	1	1	>sp|Q9HVY3|RS9_PSEAE 30S ribosomal protein S9 OS=Pseudomonas aeruginosa (strain ATCC 15692 / PAO1 / 1C / PRS 101 / LMG 12228) GN=rpsI PE=3 SV=1	1	1	1	1	7.7	7.7	7.7	14.615	130	130	0.0042373	5.5893	0	1				83	81	TRUE	83	146	308	308
sp|Q9HW02|MURC_PSEAE	sp|Q9HW02|MURC_PSEAE	1	1	1	>sp|Q9HW02|MURC_PSEAE UDP-N-acetylmuramate--L-alanine ligase OS=Pseudomonas aeruginosa (strain ATCC 15692 / PAO1 / 1C / PRS 101 / LMG 12228) GN=murC PE=3 SV=1	1	1	1	1	2.9	2.9	2.9	51.981	480	480	0	10.961	2732700	2				84	615	TRUE	622	1073;1074	2086;2087	2087
sp|Q9HWC8|RL7_PSEAE	sp|Q9HWC8|RL7_PSEAE	1	1	1	>sp|Q9HWC8|RL7_PSEAE 50S ribosomal protein L7/L12 OS=Pseudomonas aeruginosa (strain ATCC 15692 / PAO1 / 1C / PRS 101 / LMG 12228) GN=rplL PE=3 SV=1	1	1	1	1	9	9	9	12.479	122	122	0.0042553	5.6246	731520	1				85	158	TRUE	160	263	503	503
sp|Q9HWC9|RPOC_PSEAE	sp|Q9HWC9|RPOC_PSEAE	36	36	36	>sp|Q9HWC9|RPOC_PSEAE DNA-directed RNA polymerase subunit beta OS=Pseudomonas aeruginosa (strain ATCC 15692 / PAO1 / 1C / PRS 101 / LMG 12228) GN=rpoC PE=3 SV=1	1	36	36	36	35.1	35.1	35.1	154.38	1399	1399	0	290.79	560420000	107				86	14;84;87;131;186;220;229;233;251;281;282;326;331;367;436;447;454;498;517;578;592;598;631;661;678;688;700;757;864;869;953;989;1011;1019;1041;1106	True;True;True;True;True;True;True;True;True;True;True;True;True;True;True;True;True;True;True;True;True;True;True;True;True;True;True;True;True;True;True;True;True;True;True;True	14;86;89;133;188;223;232;236;254;284;285;330;335;371;441;452;459;505;524;585;599;605;638;669;687;697;709;768;876;881;966;1002;1024;1032;1054;1119	25;26;149;150;153;154;220;311;312;313;314;377;390;391;397;398;427;428;475;476;477;550;551;558;559;623;624;730;731;746;760;761;850;891;997;998;1033;1044;1045;1098;1099;1150;1151;1183;1200;1201;1220;1221;1347;1348;1527;1528;1535;1681;1682;1749;1787;1804;1805;1806;1844;1967;1968	61;62;311;312;313;314;315;316;317;321;322;323;438;600;601;602;603;604;605;606;607;608;609;610;611;781;807;808;809;810;816;817;818;870;871;872;873;874;875;960;961;962;1071;1072;1079;1080;1189;1190;1191;1192;1393;1394;1395;1396;1397;1398;1414;1438;1439;1680;1758;1759;1948;1949;1950;1951;1952;1953;2012;2013;2034;2035;2036;2123;2124;2226;2227;2228;2229;2312;2334;2335;2369;2370;2612;2613;2614;2615;261…	62;315;322;438;609;781;808;816;870;961;962;1071;1080;1190;1397;1414;1438;1680;1759;1950;2013;2034;2124;2226;2312;2334;2370;2614;2962;2980;3295;3430;3500;3527;3608;3874
sp|Q9HWD2|EFG1_PSEAE;sp|Q9I244|EFG2_PSEAE	sp|Q9HWD2|EFG1_PSEAE	20;6	20;6	20;6	>sp|Q9HWD2|EFG1_PSEAE Elongation factor G 1 OS=Pseudomonas aeruginosa (strain ATCC 15692 / PAO1 / 1C / PRS 101 / LMG 12228) GN=fusA PE=1 SV=1	2	20	20	20	42.8	42.8	42.8	77.784	706	706;702	0	175.64	434130000	64				87	32;40;134;141;225;266;273;357;365;388;390;416;540;571;577;682;741;968;1069;1084	True;True;True;True;True;True;True;True;True;True;True;True;True;True;True;True;True;True;True;True	32;40;136;143;228;269;276;361;369;393;395;421;547;578;584;691;752;981;1082;1097	57;58;71;72;223;224;236;237;384;451;452;461;608;620;621;657;658;660;661;698;699;925;926;978;996;1188;1189;1318;1319;1710;1711;1889;1890;1913;1914	114;115;116;117;118;119;120;121;122;144;145;441;442;443;459;460;461;790;908;909;910;919;1164;1165;1185;1186;1187;1254;1255;1256;1257;1258;1259;1260;1262;1263;1264;1334;1335;1336;1337;1816;1817;1909;1947;2318;2319;2320;2564;2565;2566;2567;3365;3366;3367;3680;3681;3682;3683;3684;3685;3686;3712;3713;3714;3715;3716	114;144;442;460;790;908;919;1165;1186;1258;1263;1334;1817;1909;1947;2318;2564;3365;3680;3715
sp|Q9HWD5|RL3_PSEAE	sp|Q9HWD5|RL3_PSEAE	2	2	2	>sp|Q9HWD5|RL3_PSEAE 50S ribosomal protein L3 OS=Pseudomonas aeruginosa (strain ATCC 15692 / PAO1 / 1C / PRS 101 / LMG 12228) GN=rplC PE=3 SV=1	1	2	2	2	16.6	16.6	16.6	22.591	211	211	0	12.637	37438000	2				88	431;1047	True;True	436;1060	723;1853;1854	1385;3620;3621	1385;3621
sp|Q9HWD8|RL2_PSEAE	sp|Q9HWD8|RL2_PSEAE	4	4	4	>sp|Q9HWD8|RL2_PSEAE 50S ribosomal protein L2 OS=Pseudomonas aeruginosa (strain ATCC 15692 / PAO1 / 1C / PRS 101 / LMG 12228) GN=rplB PE=3 SV=1	1	4	4	4	21.6	21.6	21.6	29.579	273	273	0	36.359	71841000	15				89	135;384;385;809	True;True;True;True	137;389;390;820	225;226;227;228;650;651;652;653;1429;1430	444;445;446;447;448;1241;1242;1243;1244;1245;1246;1247;1248;2770;2771	445;1243;1248;2770
sp|Q9HWE1|RS3_PSEAE	sp|Q9HWE1|RS3_PSEAE	4	4	4	>sp|Q9HWE1|RS3_PSEAE 30S ribosomal protein S3 OS=Pseudomonas aeruginosa (strain ATCC 15692 / PAO1 / 1C / PRS 101 / LMG 12228) GN=rpsC PE=3 SV=1	1	4	4	4	24.1	24.1	24.1	25.838	228	228	0	26.936	20790000	7				90	417;518;762;790	True;True;True;True	422;525;773;801	700;892;1357;1358;1400	1338;1760;1761;2640;2641;2642;2719	1338;1761;2640;2719
sp|Q9HWE2|RL16_PSEAE	sp|Q9HWE2|RL16_PSEAE	3	3	3	>sp|Q9HWE2|RL16_PSEAE 50S ribosomal protein L16 OS=Pseudomonas aeruginosa (strain ATCC 15692 / PAO1 / 1C / PRS 101 / LMG 12228) GN=rplP PE=3 SV=1	1	3	3	3	23.4	23.4	23.4	15.401	137	137	0	22.443	48262000	5				91	627;1015;1040	True;True;True	634;1028;1053	1093;1794;1795;1796;1842;1843	2117;3510;3511;3512;3606;3607	2117;3510;3607
sp|Q9HWE5|RL14_PSEAE	sp|Q9HWE5|RL14_PSEAE	3	3	3	>sp|Q9HWE5|RL14_PSEAE 50S ribosomal protein L14 OS=Pseudomonas aeruginosa (strain ATCC 15692 / PAO1 / 1C / PRS 101 / LMG 12228) GN=rplN PE=3 SV=1	1	3	3	3	31.1	31.1	31.1	13.412	122	122	0	38.928	40283000	7				92	283;693;1085	True;True;True	286;702;1098	478;479;1209;1210;1915;1916	963;964;2351;2352;2353;3717;3718	963;2352;3717
sp|Q9HWE8|RS14_PSEAE	sp|Q9HWE8|RS14_PSEAE	1	1	1	>sp|Q9HWE8|RS14_PSEAE 30S ribosomal protein S14 OS=Pseudomonas aeruginosa (strain ATCC 15692 / PAO1 / 1C / PRS 101 / LMG 12228) GN=rpsN PE=3 SV=1	1	1	1	1	12.9	12.9	12.9	11.565	101	101	0	8.6424	1537200	1				93	63	TRUE	65	116	257	257
sp|Q9HWF2|RS5_PSEAE	sp|Q9HWF2|RS5_PSEAE	4	4	4	>sp|Q9HWF2|RS5_PSEAE 30S ribosomal protein S5 OS=Pseudomonas aeruginosa (strain ATCC 15692 / PAO1 / 1C / PRS 101 / LMG 12228) GN=rpsE PE=3 SV=1	1	4	4	4	34.9	34.9	34.9	17.625	166	166	0	42.272	51196000	8				94	149;428;752;1067	True;True;True;True	151;433;763;1080	250;251;718;1339;1885;1886	482;483;1378;2598;3674;3675;3676;3677	482;1378;2598;3676
sp|Q9HWF7|RS13_PSEAE	sp|Q9HWF7|RS13_PSEAE	1	1	1	>sp|Q9HWF7|RS13_PSEAE 30S ribosomal protein S13 OS=Pseudomonas aeruginosa (strain ATCC 15692 / PAO1 / 1C / PRS 101 / LMG 12228) GN=rpsM PE=3 SV=1	1	1	1	1	11	11	11	13.265	118	118	0	8.1074	10925000	3				95	452	TRUE	457	756;757	1431;1432;1433	1433
sp|Q9HWF8|RS11_PSEAE	sp|Q9HWF8|RS11_PSEAE	1	1	1	>sp|Q9HWF8|RS11_PSEAE 30S ribosomal protein S11 OS=Pseudomonas aeruginosa (strain ATCC 15692 / PAO1 / 1C / PRS 101 / LMG 12228) GN=rpsK PE=3 SV=1	1	1	1	1	8.5	8.5	8.5	13.629	129	129	0	6.575	5087700	1				96	50	TRUE	50	87	190	190
sp|Q9HWG0|UVRA_PSEAE	sp|Q9HWG0|UVRA_PSEAE	2	2	2	>sp|Q9HWG0|UVRA_PSEAE UvrABC system protein A OS=Pseudomonas aeruginosa (strain ATCC 15692 / PAO1 / 1C / PRS 101 / LMG 12228) GN=uvrA PE=3 SV=1	1	2	2	2	4.3	4.3	4.3	104.49	945	945	0	16.191	3883600	3				97	544;581	True;True	551;588	933;1002;1003	1826;1959;1960	1826;1959
sp|Q9HWZ6|IPYR_PSEAE	sp|Q9HWZ6|IPYR_PSEAE	1	1	1	>sp|Q9HWZ6|IPYR_PSEAE Inorganic pyrophosphatase OS=Pseudomonas aeruginosa (strain ATCC 15692 / PAO1 / 1C / PRS 101 / LMG 12228) GN=ppa PE=1 SV=1	1	1	1	1	6.3	6.3	6.3	19.396	175	175	0	6.5829	1218100	1				98	965	TRUE	978	1706	3361	3361
sp|Q9HX33|SYL_PSEAE	sp|Q9HX33|SYL_PSEAE	2	2	2	>sp|Q9HX33|SYL_PSEAE Leucine--tRNA ligase OS=Pseudomonas aeruginosa (strain ATCC 15692 / PAO1 / 1C / PRS 101 / LMG 12228) GN=leuS PE=3 SV=1	1	2	2	2	3.7	3.7	3.7	97.647	873	873	0	20.145	6314600	9				99	304;596	True;True	307;603	510;511;512;513;1042	1005;1006;1007;1008;1009;1010;1011;2031;2032	1005;2031
sp|Q9HXJ4|ISPG_PSEAE	sp|Q9HXJ4|ISPG_PSEAE	1	1	1	>sp|Q9HXJ4|ISPG_PSEAE 4-hydroxy-3-methylbut-2-en-1-yl diphosphate synthase (flavodoxin) OS=Pseudomonas aeruginosa (strain ATCC 15692 / PAO1 / 1C / PRS 101 / LMG 12228) GN=ispG PE=3 SV=1	1	1	1	1	4.9	4.9	4.9	40.056	371	371	0	10.857	9426400	3				100	811	TRUE	822	1433;1434	2776;2777;2778	2777
sp|Q9HXN2|PUR4_PSEAE	sp|Q9HXN2|PUR4_PSEAE	1	1	1	>sp|Q9HXN2|PUR4_PSEAE Phosphoribosylformylglycinamidine synthase OS=Pseudomonas aeruginosa (strain ATCC 15692 / PAO1 / 1C / PRS 101 / LMG 12228) GN=purL PE=3 SV=1	1	1	1	1	1.1	1.1	1.1	140.65	1298	1298	0	8.5204	2211100	3				101	1044	TRUE	1057	1848;1849	3614;3615;3616	3614
sp|Q9HXZ1|DPO3A_PSEAE	sp|Q9HXZ1|DPO3A_PSEAE	1	1	1	>sp|Q9HXZ1|DPO3A_PSEAE DNA polymerase III subunit alpha OS=Pseudomonas aeruginosa (strain ATCC 15692 / PAO1 / 1C / PRS 101 / LMG 12228) GN=dnaE PE=3 SV=1	1	1	1	1	1.6	1.6	1.6	130.9	1173	1173	0	8.4967	1112700	2				102	150	TRUE	152	252	484;485	485
sp|Q9HXZ2|ACCA_PSEAE	sp|Q9HXZ2|ACCA_PSEAE	1	1	1	>sp|Q9HXZ2|ACCA_PSEAE Acetyl-coenzyme A carboxylase carboxyl transferase subunit alpha OS=Pseudomonas aeruginosa (strain ATCC 15692 / PAO1 / 1C / PRS 101 / LMG 12228) GN=accA PE=1 SV=1	1	1	1	1	5.1	5.1	5.1	34.947	316	316	0	10.77	8153900	4				103	658	TRUE	666	1144;1145	2217;2218;2219;2220	2220
sp|Q9HXZ4|PYRG_PSEAE	sp|Q9HXZ4|PYRG_PSEAE	9	9	9	>sp|Q9HXZ4|PYRG_PSEAE CTP synthase OS=Pseudomonas aeruginosa (strain ATCC 15692 / PAO1 / 1C / PRS 101 / LMG 12228) GN=pyrG PE=3 SV=1	1	9	9	9	23.2	23.2	23.2	59.617	542	542	0	64.069	68524000	13				104	346;414;488;836;883;935;1093;1102;1112	True;True;True;True;True;True;True;True;True	350;419;493;847;895;948;1106;1115;1125	586;587;695;696;832;1475;1562;1656;1657;1945;1946;1963;1977;1978	1124;1125;1330;1331;1646;1647;2834;3052;3261;3262;3837;3838;3869;3892;3893	1125;1330;1646;2834;3052;3261;3838;3869;3893
sp|Q9HXZ5|ENO_PSEAE	sp|Q9HXZ5|ENO_PSEAE	3	3	3	>sp|Q9HXZ5|ENO_PSEAE Enolase OS=Pseudomonas aeruginosa (strain ATCC 15692 / PAO1 / 1C / PRS 101 / LMG 12228) GN=eno PE=3 SV=1	1	3	3	3	9.6	9.6	9.6	45.195	429	429	0	26.439	28266000	5				105	303;352;1031	True;True;True	306;356;1044	509;599;1826;1827	1004;1149;3569;3570;3571	1004;1149;3570
sp|Q9HY84|ASSY_PSEAE	sp|Q9HY84|ASSY_PSEAE	2	2	2	>sp|Q9HY84|ASSY_PSEAE Argininosuccinate synthase OS=Pseudomonas aeruginosa (strain ATCC 15692 / PAO1 / 1C / PRS 101 / LMG 12228) GN=argG PE=3 SV=1	1	2	2	2	10.4	10.4	10.4	45.297	405	405	0	12.15	6597900	2				106	112;586	True;True	114;593	190;1010	387;1968	387;1968
sp|Q9HYC7|SYM_PSEAE	sp|Q9HYC7|SYM_PSEAE	1	1	1	>sp|Q9HYC7|SYM_PSEAE Methionine--tRNA ligase OS=Pseudomonas aeruginosa (strain ATCC 15692 / PAO1 / 1C / PRS 101 / LMG 12228) GN=metG PE=3 SV=1	1	1	1	1	1.6	1.6	1.6	74.903	677	677	0	6.4689	3306900	1				107	647	TRUE	654	1126	2173	2173
sp|Q9HYD5|MAO1_PSEAE	sp|Q9HYD5|MAO1_PSEAE	2	2	2	>sp|Q9HYD5|MAO1_PSEAE NAD-dependent malic enzyme OS=Pseudomonas aeruginosa (strain ATCC 15692 / PAO1 / 1C / PRS 101 / LMG 12228) GN=maeA PE=3 SV=1	1	2	2	2	4.6	4.6	4.6	62.42	564	564	0	14.025	5237300	3				108	362;1073	True;True	366;1086	616;617;1896	1181;1182;3692	1181;3692
sp|Q9HYL2|NOSZ_PSEAE	sp|Q9HYL2|NOSZ_PSEAE	1	1	1	>sp|Q9HYL2|NOSZ_PSEAE Nitrous-oxide reductase OS=Pseudomonas aeruginosa (strain ATCC 15692 / PAO1 / 1C / PRS 101 / LMG 12228) GN=nosZ PE=3 SV=1	1	1	1	1	3.1	3.1	3.1	70.659	636	636	0	5.8178	4089500	1				109	481	TRUE	486	823	1634	1634
sp|Q9HYQ8|HLDD_PSEAE	sp|Q9HYQ8|HLDD_PSEAE	1	1	1	>sp|Q9HYQ8|HLDD_PSEAE ADP-L-glycero-D-manno-heptose-6-epimerase OS=Pseudomonas aeruginosa (strain ATCC 15692 / PAO1 / 1C / PRS 101 / LMG 12228) GN=hldD PE=3 SV=2	1	1	1	1	6.7	6.7	6.7	37.188	330	330	0	7.7441	3261600	1				110	109	TRUE	111	183	369	369
sp|Q9HZ71|RS1_PSEAE	sp|Q9HZ71|RS1_PSEAE	9	9	9	>sp|Q9HZ71|RS1_PSEAE 30S ribosomal protein S1 OS=Pseudomonas aeruginosa (strain ATCC 15692 / PAO1 / 1C / PRS 101 / LMG 12228) GN=rpsA PE=3 SV=1	1	9	9	9	24.3	24.3	24.3	61.869	559	559	0	71.915	165330000	24				111	39;211;321;339;519;748;787;789;865	True;True;True;True;True;True;True;True;True	39;214;325;343;526;759;798;800;877	69;70;362;363;542;543;573;574;893;1331;1332;1333;1395;1398;1399;1529	140;141;142;143;752;753;754;755;756;1061;1062;1063;1064;1103;1104;1762;2580;2581;2582;2707;2708;2716;2717;2718;2964	141;755;1061;1104;1762;2580;2708;2716;2964
sp|Q9HZ76|WBPE_PSEAE	sp|Q9HZ76|WBPE_PSEAE	5	5	5	>sp|Q9HZ76|WBPE_PSEAE UDP-2-acetamido-2-deoxy-3-oxo-D-glucuronate aminotransferase OS=Pseudomonas aeruginosa (strain ATCC 15692 / PAO1 / 1C / PRS 101 / LMG 12228) GN=wbpE PE=1 SV=1	1	5	5	5	18.7	18.7	18.7	38.924	359	359	0	45.831	64169000	18				112	451;553;948;950;1095	True;True;True;True;True	456;560;961;963;1108	754;755;944;945;1674;1675;1677;1949;1950	1429;1430;1837;1838;3284;3285;3286;3287;3289;3841;3842;3843;3844;3845;3846;3847;3848;3849	1430;1837;3284;3289;3842
sp|Q9HZA7|ACCD_PSEAE	sp|Q9HZA7|ACCD_PSEAE	2	2	2	>sp|Q9HZA7|ACCD_PSEAE Acetyl-coenzyme A carboxylase carboxyl transferase subunit beta OS=Pseudomonas aeruginosa (strain ATCC 15692 / PAO1 / 1C / PRS 101 / LMG 12228) GN=accD PE=1 SV=1	1	2	2	2	10.3	10.3	10.3	31.843	290	290	0	13.285	6896900	2				113	538;711	True;True	545;720	921;1240	1812;2400	1812;2400
sp|Q9HZE0|DHE2_PSEAE	sp|Q9HZE0|DHE2_PSEAE	40	40	40	>sp|Q9HZE0|DHE2_PSEAE NAD-specific glutamate dehydrogenase OS=Pseudomonas aeruginosa (strain ATCC 15692 / PAO1 / 1C / PRS 101 / LMG 12228) GN=gdhB PE=1 SV=1	1	40	40	40	34	34	34	182.64	1620	1620	0	323.31	815070000	140				114	7;13;64;69;74;92;117;171;226;237;242;260;381;402;430;464;539;559;574;593;610;617;662;671;713;715;731;794;829;841;888;915;981;988;1005;1045;1053;1068;1091;1116	True;True;True;True;True;True;True;True;True;True;True;True;True;True;True;True;True;True;True;True;True;True;True;True;True;True;True;True;True;True;True;True;True;True;True;True;True;True;True;True	7;13;66;71;76;94;119;173;229;240;245;263;385;407;435;469;546;566;581;600;617;624;670;679;722;725;742;805;840;852;900;927;994;1001;1018;1058;1066;1081;1104;1129	11;12;24;117;118;126;127;135;136;160;198;199;284;285;286;287;288;385;386;404;405;406;411;412;442;443;643;644;681;721;722;774;775;922;923;924;954;955;981;982;1034;1035;1065;1077;1078;1152;1153;1167;1168;1243;1244;1249;1301;1406;1464;1465;1480;1481;1574;1625;1626;1734;1735;1747;1748;1775;1776;1850;1863;1887;1888;1941;1942;1943;1983;1984	23;24;60;258;259;260;272;273;274;284;285;286;334;400;401;402;403;404;405;406;530;531;532;533;534;535;536;537;538;539;540;541;542;543;544;545;546;547;548;549;550;551;552;553;554;555;791;792;793;794;830;831;832;833;834;835;836;841;842;843;893;894;1217;1218;1219;1313;1314;1383;1384;1454;1455;1813;1814;1815;1850;1851;1852;1913;1914;1915;1916;1917;1918;1919;2014;2015;2016;2017;2073;2092;2093;2094;2095…	24;60;258;274;285;334;402;533;792;832;841;894;1219;1314;1384;1455;1814;1852;1914;2014;2073;2094;2231;2257;2406;2421;2542;2727;2820;2839;3073;3196;3404;3429;3485;3617;3645;3678;3831;3901
sp|Q9HZJ2|FADB_PSEAE	sp|Q9HZJ2|FADB_PSEAE	9	9	9	>sp|Q9HZJ2|FADB_PSEAE Fatty acid oxidation complex subunit alpha OS=Pseudomonas aeruginosa (strain ATCC 15692 / PAO1 / 1C / PRS 101 / LMG 12228) GN=fadB PE=3 SV=1	1	9	9	9	18.7	18.7	18.7	76.953	715	715	0	70.617	44271000	16				115	218;337;579;645;879;893;929;1004;1103	True;True;True;True;True;True;True;True;True	221;341;586;652;891;905;942;1017;1116	374;569;570;999;1000;1123;1554;1555;1595;1648;1774;1964	778;1097;1098;1099;1100;1954;1955;2170;3028;3029;3030;3153;3244;3245;3483;3870	778;1099;1955;2170;3030;3153;3245;3483;3870
sp|Q9HZJ3|FADA_PSEAE	sp|Q9HZJ3|FADA_PSEAE	2	2	2	>sp|Q9HZJ3|FADA_PSEAE 3-ketoacyl-CoA thiolase OS=Pseudomonas aeruginosa (strain ATCC 15692 / PAO1 / 1C / PRS 101 / LMG 12228) GN=fadA PE=3 SV=1	1	2	2	2	5.9	5.9	5.9	41.643	391	391	0	12.339	12821000	1				116	119;485	True;True	121;490	202;829	410;1643	410;1643
sp|Q9HZP6|ETFB_PSEAE	sp|Q9HZP6|ETFB_PSEAE	2	2	2	>sp|Q9HZP6|ETFB_PSEAE Electron transfer flavoprotein subunit beta OS=Pseudomonas aeruginosa (strain ATCC 15692 / PAO1 / 1C / PRS 101 / LMG 12228) GN=etfB PE=3 SV=1	1	2	2	2	11.6	11.6	11.6	26.376	249	249	0	12.353	12620000	4				117	66;967	True;True	68;980	120;121;1708;1709	262;263;3363;3364	262;3363
sp|Q9I099|SYT_PSEAE	sp|Q9I099|SYT_PSEAE	1	1	1	>sp|Q9I099|SYT_PSEAE Threonine--tRNA ligase OS=Pseudomonas aeruginosa (strain ATCC 15692 / PAO1 / 1C / PRS 101 / LMG 12228) GN=thrS PE=3 SV=1	1	1	1	1	1.7	1.7	1.7	73.079	640	640	0	6.5037	7998900	2				118	768	TRUE	779	1366;1367	2653;2654	2653
sp|Q9I0A2|RL20_PSEAE	sp|Q9I0A2|RL20_PSEAE	2	2	2	>sp|Q9I0A2|RL20_PSEAE 50S ribosomal protein L20 OS=Pseudomonas aeruginosa (strain ATCC 15692 / PAO1 / 1C / PRS 101 / LMG 12228) GN=rplT PE=3 SV=1	1	2	2	2	16.1	16.1	16.1	13.365	118	118	0	11.946	6285200	2				119	1;997	True;True	1;1010	1;1762	2;3450	2;3450
sp|Q9I0J1|NUOL_PSEAE	sp|Q9I0J1|NUOL_PSEAE	1	1	1	>sp|Q9I0J1|NUOL_PSEAE NADH-quinone oxidoreductase subunit L OS=Pseudomonas aeruginosa (strain ATCC 15692 / PAO1 / 1C / PRS 101 / LMG 12228) GN=nuoL PE=3 SV=1	1	1	1	1	1.6	1.6	1.6	66.227	615	615	0	6.1445	0	1				120	911	TRUE	923	1620	3186	3186
sp|Q9I0J5|NUOH_PSEAE	sp|Q9I0J5|NUOH_PSEAE	1	1	1	>sp|Q9I0J5|NUOH_PSEAE NADH-quinone oxidoreductase subunit H OS=Pseudomonas aeruginosa (strain ATCC 15692 / PAO1 / 1C / PRS 101 / LMG 12228) GN=nuoH PE=3 SV=1	1	1	1	1	4.5	4.5	4.5	36.743	331	331	0	10.859	9404400	3				121	983	TRUE	996	1738;1739	3408;3409;3410	3408
sp|Q9I0J6|NUOG_PSEAE	sp|Q9I0J6|NUOG_PSEAE	13	13	13	>sp|Q9I0J6|NUOG_PSEAE NADH-quinone oxidoreductase subunit G OS=Pseudomonas aeruginosa (strain ATCC 15692 / PAO1 / 1C / PRS 101 / LMG 12228) GN=nuoG PE=3 SV=1	1	13	13	13	22.3	22.3	22.3	98.999	905	905	0	102.6	188840000	27				122	58;80;129;287;292;325;478;548;573;591;638;1056;1059	True;True;True;True;True;True;True;True;True;True;True;True;True	59;82;131;290;295;329;483;555;580;598;645;1069;1072	102;145;216;217;484;485;493;494;549;819;939;980;1031;1032;1109;1110;1111;1112;1866;1867;1871	223;224;307;433;434;435;969;970;978;979;1070;1630;1832;1911;1912;2006;2007;2008;2009;2010;2011;2142;2143;2144;2145;3648;3649;3653	223;307;434;970;979;1070;1630;1832;1912;2008;2144;3649;3653
sp|Q9I0J7|NUOF_PSEAE	sp|Q9I0J7|NUOF_PSEAE	4	4	4	>sp|Q9I0J7|NUOF_PSEAE NADH-quinone oxidoreductase subunit F OS=Pseudomonas aeruginosa (strain ATCC 15692 / PAO1 / 1C / PRS 101 / LMG 12228) GN=nuoF PE=3 SV=1	1	4	4	4	13.6	13.6	13.6	48.678	448	448	0	39.608	7813900	8				123	23;690;699;905	True;True;True;True	23;699;708;917	44;1204;1205;1219;1612	96;2342;2343;2344;2345;2346;2347;2368;3177	96;2347;2368;3177
sp|Q9I0J9|NUOCD_PSEAE	sp|Q9I0J9|NUOCD_PSEAE	8	8	8	>sp|Q9I0J9|NUOCD_PSEAE NADH-quinone oxidoreductase subunit C/D OS=Pseudomonas aeruginosa (strain ATCC 15692 / PAO1 / 1C / PRS 101 / LMG 12228) GN=nuoC PE=3 SV=1	1	8	8	8	16.4	16.4	16.4	68.322	593	593	0	69.315	47314000	13				124	189;210;288;353;369;589;896;1050	True;True;True;True;True;True;True;True	192;213;291;357;373;596;908;1063	325;360;361;486;487;600;627;1027;1028;1598;1859	675;749;750;751;971;972;1150;1195;2001;2002;2003;3156;3630	675;751;971;1150;1195;2002;3156;3630
sp|Q9I0K4|ACEA_PSEAE	sp|Q9I0K4|ACEA_PSEAE	12	12	12	>sp|Q9I0K4|ACEA_PSEAE Isocitrate lyase OS=Pseudomonas aeruginosa (strain ATCC 15692 / PAO1 / 1C / PRS 101 / LMG 12228) GN=PA2634 PE=1 SV=1	1	12	12	12	30.7	30.7	30.7	58.886	531	531	0	120.73	211880000	54				125	208;243;394;543;613;666;739;793;802;814;881;1046	True;True;True;True;True;True;True;True;True;True;True;True	211;246;399;550;620;674;750;804;813;825;893;1059	355;413;414;667;668;931;932;1070;1071;1160;1161;1314;1315;1404;1405;1418;1439;1557;1558;1559;1851;1852	733;734;735;736;737;738;844;845;846;847;1273;1274;1824;1825;2081;2082;2083;2084;2239;2240;2241;2242;2243;2244;2245;2246;2556;2557;2558;2559;2560;2723;2724;2725;2754;2785;3032;3033;3034;3035;3036;3037;3038;3039;3040;3041;3042;3043;3044;3045;3046;3047;3618;3619	734;845;1274;1825;2083;2243;2560;2724;2754;2785;3041;3619
sp|Q9I0Q0|PQSH_PSEAE	sp|Q9I0Q0|PQSH_PSEAE	1	1	1	>sp|Q9I0Q0|PQSH_PSEAE 2-heptyl-3-hydroxy-4(1H)-quinolone synthase OS=Pseudomonas aeruginosa (strain ATCC 15692 / PAO1 / 1C / PRS 101 / LMG 12228) GN=pqsH PE=3 SV=1	1	1	1	1	7.6	7.6	7.6	42.081	382	382	0	6.0821	6068100	3				126	126	TRUE	128	211;212	426;427;428	426
sp|Q9I1L9|DLDH1_PSEAE	sp|Q9I1L9|DLDH1_PSEAE	1	1	1	>sp|Q9I1L9|DLDH1_PSEAE Dihydrolipoyl dehydrogenase OS=Pseudomonas aeruginosa (strain ATCC 15692 / PAO1 / 1C / PRS 101 / LMG 12228) GN=lpdV PE=1 SV=1	1	1	1	1	2.8	2.8	2.8	48.588	464	464	0	8.0015	0	2				127	232	TRUE	235	395;396	814;815	814
sp|Q9I1S2|HCNB_PSEAE	sp|Q9I1S2|HCNB_PSEAE	7	7	7	>sp|Q9I1S2|HCNB_PSEAE Hydrogen cyanide synthase subunit HcnB OS=Pseudomonas aeruginosa (strain ATCC 15692 / PAO1 / 1C / PRS 101 / LMG 12228) GN=hcnB PE=1 SV=1	1	7	7	7	21.3	21.3	21.3	50.388	464	464	0	46.607	52511000	12				128	54;75;133;264;409;614;924	True;True;True;True;True;True;True	55;77;135;267;414;621;936	95;96;137;138;222;448;449;690;1072;1640	209;210;287;288;440;902;903;904;905;1325;2085;3233;3234	210;287;440;904;1325;2085;3233
sp|Q9I2A8|ATOB_PSEAE	sp|Q9I2A8|ATOB_PSEAE	4	4	4	>sp|Q9I2A8|ATOB_PSEAE Acetyl-CoA acetyltransferase OS=Pseudomonas aeruginosa (strain ATCC 15692 / PAO1 / 1C / PRS 101 / LMG 12228) GN=atoB PE=3 SV=1	1	4	4	4	14.5	14.5	14.5	40.405	393	393	0	25.306	9718700	5				129	78;223;415;710	True;True;True;True	80;226;420;719	142;380;381;697;1238;1239	293;785;786;1332;1333;2398;2399	293;785;1333;2399
sp|Q9I2U8|SYQ_PSEAE	sp|Q9I2U8|SYQ_PSEAE	1	1	1	>sp|Q9I2U8|SYQ_PSEAE Glutamine--tRNA ligase OS=Pseudomonas aeruginosa (strain ATCC 15692 / PAO1 / 1C / PRS 101 / LMG 12228) GN=glnS PE=1 SV=1	1	1	1	1	2.3	2.3	2.3	62.912	556	556	0.004329	5.6852	1075700	0				130	28	TRUE	28	52	109	109
sp|Q9I2V5|ACNB_PSEAE	sp|Q9I2V5|ACNB_PSEAE	17	17	17	>sp|Q9I2V5|ACNB_PSEAE Aconitate hydratase B OS=Pseudomonas aeruginosa (strain ATCC 15692 / PAO1 / 1C / PRS 101 / LMG 12228) GN=acnB PE=3 SV=1	1	17	17	17	25.9	25.9	25.9	93.627	869	869	0	136.61	244280000	54				131	26;43;178;190;335;344;480;521;626;634;667;680;714;866;922;1033;1077	True;True;True;True;True;True;True;True;True;True;True;True;True;True;True;True;True	26;43;180;193;339;348;485;528;633;641;675;689;723;724;878;934;1046;1090	48;49;76;297;298;326;566;567;581;582;583;822;895;1091;1092;1103;1162;1163;1185;1245;1246;1247;1248;1530;1531;1638;1830;1831;1902;1903	103;104;105;168;567;568;569;570;571;572;573;574;676;677;1091;1092;1093;1094;1095;1115;1116;1117;1118;1633;1764;2114;2115;2116;2129;2247;2248;2314;2410;2411;2412;2413;2414;2415;2416;2417;2418;2419;2420;2965;2966;2967;2968;2969;3230;3576;3577;3578;3579;3700;3701	103;168;573;677;1094;1118;1633;1764;2115;2129;2247;2314;2414;2968;3230;3576;3700	10	423
sp|Q9I383|SELD_PSEAE	sp|Q9I383|SELD_PSEAE	2	2	2	>sp|Q9I383|SELD_PSEAE Selenide, water dikinase OS=Pseudomonas aeruginosa (strain ATCC 15692 / PAO1 / 1C / PRS 101 / LMG 12228) GN=selD PE=3 SV=1	1	2	2	2	8.7	8.7	8.7	36.353	344	344	0	11.569	5015700	3				132	108;970	True;True	110;983	182;1715	367;368;3371	367;3371
sp|Q9I3A8|GPDA_PSEAE	sp|Q9I3A8|GPDA_PSEAE	1	1	1	>sp|Q9I3A8|GPDA_PSEAE Glycerol-3-phosphate dehydrogenase [NAD(P)+] OS=Pseudomonas aeruginosa (strain ATCC 15692 / PAO1 / 1C / PRS 101 / LMG 12228) GN=gpsA PE=3 SV=1	1	1	1	1	3.2	3.2	3.2	36.773	340	340	0	11.88	1396900	1				133	904	TRUE	916	1611	3176	3176
sp|Q9I3D1|DLDH2_PSEAE	sp|Q9I3D1|DLDH2_PSEAE	11	11	11	>sp|Q9I3D1|DLDH2_PSEAE Dihydrolipoyl dehydrogenase OS=Pseudomonas aeruginosa (strain ATCC 15692 / PAO1 / 1C / PRS 101 / LMG 12228) GN=lpdG PE=3 SV=1	1	11	11	11	36.2	36.2	36.2	50.164	478	478	0	95.379	190240000	29				134	24;83;99;122;125;392;566;749;804;851;931	True;True;True;True;True;True;True;True;True;True;True	24;85;101;124;127;397;573;760;815;863;944	45;46;148;169;206;209;210;663;664;967;968;1334;1335;1420;1500;1650;1651	97;98;99;100;101;310;346;417;418;419;420;423;424;425;1266;1267;1268;1269;1872;1873;1874;2583;2584;2756;2757;2889;2890;3247;3248	100;310;346;417;423;1269;1872;2583;2757;2889;3248
sp|Q9I3D2|ODO2_PSEAE	sp|Q9I3D2|ODO2_PSEAE	2	2	2	>sp|Q9I3D2|ODO2_PSEAE Dihydrolipoyllysine-residue succinyltransferase component of 2-oxoglutarate dehydrogenase complex OS=Pseudomonas aeruginosa (strain ATCC 15692 / PAO1 / 1C / PRS 101 / LMG 12228) GN=sucB PE=3 SV=1	1	2	2	2	8.6	8.6	8.6	42.887	409	409	0	14.645	22461000	4				135	575;655	True;True	582;662	983;1136;1137	1920;2183;2184;2185	1920;2185
sp|Q9I3F5|ACNA_PSEAE	sp|Q9I3F5|ACNA_PSEAE	16	16	16	>sp|Q9I3F5|ACNA_PSEAE Aconitate hydratase A OS=Pseudomonas aeruginosa (strain ATCC 15692 / PAO1 / 1C / PRS 101 / LMG 12228) GN=acnA PE=3 SV=1	1	16	16	16	28.9	28.9	28.9	99.147	910	910	0	133.79	223330000	58				136	67;228;310;421;456;474;535;607;907;916;947;957;1001;1008;1070;1115	True;True;True;True;True;True;True;True;True;True;True;True;True;True;True;True	69;231;314;426;461;479;542;614;919;928;960;970;1014;1021;1083;1128	122;123;388;389;527;705;763;791;917;918;1059;1615;1627;1628;1629;1630;1673;1688;1689;1769;1770;1781;1782;1891;1981;1982	264;265;796;797;798;799;800;801;802;803;804;805;806;1042;1345;1441;1442;1490;1808;1809;2053;2054;2055;3180;3197;3198;3199;3200;3201;3202;3203;3204;3205;3206;3207;3208;3209;3210;3211;3212;3283;3303;3304;3305;3306;3307;3308;3309;3476;3477;3478;3490;3491;3687;3896;3897;3898;3899	264;803;1042;1345;1442;1490;1808;2055;3180;3198;3283;3303;3476;3490;3687;3898
sp|Q9I3I0|Y1533_PSEAE	sp|Q9I3I0|Y1533_PSEAE	1	1	1	>sp|Q9I3I0|Y1533_PSEAE Nucleoid-associated protein PA1533 OS=Pseudomonas aeruginosa (strain ATCC 15692 / PAO1 / 1C / PRS 101 / LMG 12228) GN=PA1533 PE=3 SV=1	1	1	1	1	17.6	17.6	17.6	11.877	108	108	1	-2	0	1	+			137	341	TRUE	345	577	1110	1110	11;12	6;20
sp|Q9I558|ACSA1_PSEAE	sp|Q9I558|ACSA1_PSEAE	4	4	4	>sp|Q9I558|ACSA1_PSEAE Acetyl-coenzyme A synthetase 1 OS=Pseudomonas aeruginosa (strain ATCC 15692 / PAO1 / 1C / PRS 101 / LMG 12228) GN=acsA1 PE=3 SV=1	1	4	4	4	8.9	8.9	8.9	71.762	651	651	0	41.55	8303500	5				138	113;234;1020;1055	True;True;True;True	115;237;1033;1068	191;399;1807;1865	388;389;819;3530;3647	389;819;3530;3647
sp|Q9I576|HPPD_PSEAE	sp|Q9I576|HPPD_PSEAE	1	1	1	>sp|Q9I576|HPPD_PSEAE 4-hydroxyphenylpyruvate dioxygenase OS=Pseudomonas aeruginosa (strain ATCC 15692 / PAO1 / 1C / PRS 101 / LMG 12228) GN=hpd PE=3 SV=1	1	1	1	1	4.2	4.2	4.2	39.912	357	357	0	14.219	535270	1				139	729	TRUE	740	1298	2537	2537
sp|Q9I5A5|PTA_PSEAE	sp|Q9I5A5|PTA_PSEAE	1	1	1	>sp|Q9I5A5|PTA_PSEAE Phosphate acetyltransferase OS=Pseudomonas aeruginosa (strain ATCC 15692 / PAO1 / 1C / PRS 101 / LMG 12228) GN=pta PE=1 SV=1	1	1	1	1	1.4	1.4	1.4	75.696	704	704	0	6.9228	7580200	2				140	992	TRUE	1005	1753;1754	3434;3435	3434
sp|Q9I5Y4|PGK_PSEAE	sp|Q9I5Y4|PGK_PSEAE	1	1	1	>sp|Q9I5Y4|PGK_PSEAE Phosphoglycerate kinase OS=Pseudomonas aeruginosa (strain ATCC 15692 / PAO1 / 1C / PRS 101 / LMG 12228) GN=pgk PE=3 SV=1	1	1	1	1	4.4	4.4	4.4	40.404	387	387	0	8.2778	7461000	1				141	949	TRUE	962	1676	3288	3288
sp|Q9I5Z0|METK_PSEAE	sp|Q9I5Z0|METK_PSEAE	5	5	5	>sp|Q9I5Z0|METK_PSEAE S-adenosylmethionine synthase OS=Pseudomonas aeruginosa (strain ATCC 15692 / PAO1 / 1C / PRS 101 / LMG 12228) GN=metK PE=3 SV=1	1	5	5	5	20.2	20.2	20.2	42.709	396	396	0	31.729	31239000	9				142	412;450;696;743;1054	True;True;True;True;True	417;455;705;754;1067	693;753;1213;1214;1322;1323;1864	1328;1427;1428;2357;2358;2359;2570;2571;2572;3646	1328;1427;2357;2572;3646
sp|Q9I636|MASZ_PSEAE	sp|Q9I636|MASZ_PSEAE	2	2	2	>sp|Q9I636|MASZ_PSEAE Malate synthase G OS=Pseudomonas aeruginosa (strain ATCC 15692 / PAO1 / 1C / PRS 101 / LMG 12228) GN=glcB PE=3 SV=1	1	2	2	2	2.8	2.8	2.8	78.659	725	725	0	12.098	5541500	2				143	279;487	True;True	282;492	472;831	957;1645	957;1645
sp|Q9I685|SAHH_PSEAE	sp|Q9I685|SAHH_PSEAE	17	17	17	>sp|Q9I685|SAHH_PSEAE Adenosylhomocysteinase OS=Pseudomonas aeruginosa (strain ATCC 15692 / PAO1 / 1C / PRS 101 / LMG 12228) GN=ahcY PE=3 SV=1	1	17	17	17	43.7	43.7	43.7	51.399	469	469	0	126.53	354350000	54				144	248;332;443;468;514;641;663;738;769;773;774;803;813;952;1023;1083;1114	True;True;True;True;True;True;True;True;True;True;True;True;True;True;True;True;True	251;336;448;473;521;648;671;749;780;784;785;814;824;965;1036;1096;1127	421;422;560;561;740;741;780;781;782;880;881;882;1117;1118;1154;1155;1313;1368;1374;1375;1376;1419;1437;1438;1679;1680;1812;1813;1911;1912;1980	859;860;861;862;863;864;1081;1082;1083;1084;1408;1409;1464;1465;1466;1467;1468;1469;1470;1471;1472;1473;1474;1475;1476;1737;1738;1739;2158;2159;2160;2232;2233;2555;2655;2671;2672;2673;2674;2675;2755;2782;2783;2784;3291;3292;3293;3547;3548;3549;3550;3709;3710;3711;3895	860;1084;1409;1468;1739;2160;2232;2555;2655;2672;2675;2755;2782;3291;3550;3711;3895
sp|Q9I6E0|ILVD_PSEAE	sp|Q9I6E0|ILVD_PSEAE	1	1	1	>sp|Q9I6E0|ILVD_PSEAE Dihydroxy-acid dehydratase OS=Pseudomonas aeruginosa (strain ATCC 15692 / PAO1 / 1C / PRS 101 / LMG 12228) GN=ilvD PE=3 SV=1	1	1	1	1	2.1	2.1	2.1	65.159	612	612	0	8.5244	10510000	2				145	45	TRUE	45	78;79	171;172	172
sp|Q9I6M4|DAVT_PSEAE	sp|Q9I6M4|DAVT_PSEAE	2	2	2	>sp|Q9I6M4|DAVT_PSEAE 5-aminovalerate aminotransferase DavT OS=Pseudomonas aeruginosa (strain ATCC 15692 / PAO1 / 1C / PRS 101 / LMG 12228) GN=davT PE=1 SV=1	1	2	2	2	8.2	8.2	8.2	45.22	426	426	0	16.698	10503000	3				146	863;899	True;True	875;911	1526;1602	2961;3163;3164	2961;3163
sp|Q9I6M5|DAVD_PSEAE	sp|Q9I6M5|DAVD_PSEAE	2	2	2	>sp|Q9I6M5|DAVD_PSEAE Glutarate-semialdehyde dehydrogenase DavD OS=Pseudomonas aeruginosa (strain ATCC 15692 / PAO1 / 1C / PRS 101 / LMG 12228) GN=davD PE=1 SV=1	1	2	2	2	7.2	7.2	7.2	51.622	483	483	0	22.768	16528000	5				147	619;1021	True;True	626;1034	1080;1808;1809	2097;3531;3532;3533;3534	2097;3531
sp|Q9I742|CLPV1_PSEAE	sp|Q9I742|CLPV1_PSEAE	3	3	3	>sp|Q9I742|CLPV1_PSEAE Protein ClpV1 OS=Pseudomonas aeruginosa (strain ATCC 15692 / PAO1 / 1C / PRS 101 / LMG 12228) GN=clpV1 PE=1 SV=1	1	3	3	3	5	5	5	98.737	902	902	0	20.351	9901400	3				148	72;263;317	True;True;True	74;266;321	133;447;535	282;901;1052	282;901;1052
sp|Q9I7B8|SYGB_PSEAE	sp|Q9I7B8|SYGB_PSEAE	1	1	1	>sp|Q9I7B8|SYGB_PSEAE Glycine--tRNA ligase beta subunit OS=Pseudomonas aeruginosa (strain ATCC 15692 / PAO1 / 1C / PRS 101 / LMG 12228) GN=glyS PE=3 SV=1	1	1	1	1	2.2	2.2	2.2	73.973	684	684	0	8.5581	5088200	6				149	2	TRUE	2	2;3	3;4;5;6;7;8	5
sp|Q9I7C2|GYRB_PSEAE	sp|Q9I7C2|GYRB_PSEAE	5	5	5	>sp|Q9I7C2|GYRB_PSEAE DNA gyrase subunit B OS=Pseudomonas aeruginosa (strain ATCC 15692 / PAO1 / 1C / PRS 101 / LMG 12228) GN=gyrB PE=3 SV=1	1	5	5	5	9.1	9.1	9.1	90.188	806	806	0	44.678	37906000	5				150	254;395;746;867;880	True;True;True;True;True	257;400;757;879;892	432;669;1328;1329;1532;1556	879;1275;2577;2578;2970;3031	879;1275;2578;2970;3031
sp|Q9S646|PPK_PSEAE	sp|Q9S646|PPK_PSEAE	2	2	2	>sp|Q9S646|PPK_PSEAE Polyphosphate kinase OS=Pseudomonas aeruginosa (strain ATCC 15692 / PAO1 / 1C / PRS 101 / LMG 12228) GN=ppk PE=3 SV=1	1	2	2	2	4.5	4.5	4.5	78.292	690	690	0	13.908	4685400	4				151	484;554	True;True	489;561	828;946;947	1642;1839;1840;1841	1642;1840
sp|Q9XCL6|SYE_PSEAE	sp|Q9XCL6|SYE_PSEAE	1	1	1	>sp|Q9XCL6|SYE_PSEAE Glutamate--tRNA ligase OS=Pseudomonas aeruginosa (strain ATCC 15692 / PAO1 / 1C / PRS 101 / LMG 12228) GN=gltX PE=3 SV=2	1	1	1	1	5.1	5.1	5.1	56.749	494	494	0.0043668	5.7013	4167600	1				152	15	TRUE	15	27	63	63
sp|Q9ZFK4|KDSA_PSEAE	sp|Q9ZFK4|KDSA_PSEAE	1	1	1	>sp|Q9ZFK4|KDSA_PSEAE 2-dehydro-3-deoxyphosphooctonate aldolase OS=Pseudomonas aeruginosa (strain ATCC 15692 / PAO1 / 1C / PRS 101 / LMG 12228) GN=kdsA PE=1 SV=1	1	1	1	1	7.1	7.1	7.1	31.143	281	281	0	8.442	799850	1				153	378	TRUE	382	639	1213	1213
tr|G3XDA2|G3XDA2_PSEAE	tr|G3XDA2|G3XDA2_PSEAE	1	1	1	>tr|G3XDA2|G3XDA2_PSEAE 3-oxoacyl-[acyl-carrier-protein] synthase 2 OS=Pseudomonas aeruginosa (strain ATCC 15692 / PAO1 / 1C / PRS 101 / LMG 12228) GN=fabF1 PE=1 SV=1	1	1	1	1	5.6	5.6	5.6	43.497	414	414	0	6.3787	2301700	3				154	843	TRUE	854	1484;1485	2847;2848;2849	2847
tr|Q9HTD1|Q9HTD1_PSEAE	tr|Q9HTD1|Q9HTD1_PSEAE	25	25	25	>tr|Q9HTD1|Q9HTD1_PSEAE Probable transcarboxylase subunit OS=Pseudomonas aeruginosa (strain ATCC 15692 / PAO1 / 1C / PRS 101 / LMG 12228) GN=PA5435 PE=4 SV=1	1	25	25	25	47.1	47.1	47.1	66.095	607	607	0	195.74	647860000	121				155	10;18;100;101;116;146;164;192;209;382;420;429;522;689;771;815;816;900;1035;1036;1037;1096;1097;1100;1108	True;True;True;True;True;True;True;True;True;True;True;True;True;True;True;True;True;True;True;True;True;True;True;True;True	10;18;102;103;118;148;166;195;212;386;387;425;434;529;698;782;826;827;912;1048;1049;1050;1109;1110;1113;1121	17;18;32;33;34;170;171;172;196;197;246;272;273;329;330;356;357;358;359;645;646;647;648;704;719;720;896;897;1202;1203;1371;1372;1440;1441;1442;1443;1603;1604;1833;1834;1835;1836;1837;1951;1952;1953;1954;1955;1959;1960;1970;1971	52;53;54;69;70;71;72;73;74;75;76;77;78;79;347;348;349;350;351;352;398;399;476;515;516;685;686;687;688;689;739;740;741;742;743;744;745;746;747;748;1220;1221;1222;1223;1224;1225;1226;1227;1228;1229;1230;1231;1232;1233;1234;1235;1236;1237;1238;1343;1344;1379;1380;1381;1382;1765;1766;2336;2337;2338;2339;2340;2341;2666;2667;2668;2786;2787;2788;2789;2790;2791;2792;2793;2794;2795;2796;3165;3166;3581;358…	53;71;347;352;399;476;516;686;747;1234;1344;1381;1766;2340;2668;2786;2790;3165;3588;3591;3592;3851;3857;3862;3882	13	274
tr|Q9HTD9|Q9HTD9_PSEAE	tr|Q9HTD9|Q9HTD9_PSEAE	9	9	9	>tr|Q9HTD9|Q9HTD9_PSEAE Alcohol dehydrogenase OS=Pseudomonas aeruginosa (strain ATCC 15692 / PAO1 / 1C / PRS 101 / LMG 12228) GN=adhA PE=1 SV=1	1	9	9	9	38	38	38	35.911	342	342	0	67.386	189100000	31				156	11;19;104;182;424;546;767;777;1028	True;True;True;True;True;True;True;True;True	11;19;106;184;429;553;778;788;1041	19;20;21;35;36;175;176;177;305;306;712;713;936;937;1364;1365;1379;1380;1821;1822	55;56;57;80;81;82;83;84;85;86;355;356;357;593;594;1371;1372;1373;1829;1830;2648;2649;2650;2651;2652;2679;2680;2681;2682;2683;3560;3561	55;80;357;594;1373;1830;2650;2682;3560
tr|Q9HU11|Q9HU11_PSEAE	tr|Q9HU11|Q9HU11_PSEAE	1	1	1	>tr|Q9HU11|Q9HU11_PSEAE Uncharacterized protein OS=Pseudomonas aeruginosa (strain ATCC 15692 / PAO1 / 1C / PRS 101 / LMG 12228) GN=PA5178 PE=4 SV=1	1	1	1	1	7.6	7.6	7.6	15.46	145	145	0	5.8839	998700	1				157	34	TRUE	34	61	126	126
tr|Q9HU24|Q9HU24_PSEAE	tr|Q9HU24|Q9HU24_PSEAE	2	2	2	>tr|Q9HU24|Q9HU24_PSEAE dTDP-glucose 4,6-dehydratase OS=Pseudomonas aeruginosa (strain ATCC 15692 / PAO1 / 1C / PRS 101 / LMG 12228) GN=rmlB PE=3 SV=1	1	2	2	2	6.8	6.8	6.8	39.542	352	352	0	11.038	2179800	1				158	65;1092	True;True	67;1105	119;1944	261;3836	261;3836
tr|Q9HU38|Q9HU38_PSEAE	tr|Q9HU38|Q9HU38_PSEAE	1	1	1	>tr|Q9HU38|Q9HU38_PSEAE Uncharacterized protein OS=Pseudomonas aeruginosa (strain ATCC 15692 / PAO1 / 1C / PRS 101 / LMG 12228) GN=PA5146 PE=4 SV=1	1	1	1	1	2.3	2.3	2.3	80.849	750	750	0	6.9866	198990	4				159	318	TRUE	322	536;537	1053;1054;1055;1056	1055
tr|Q9HUD3|Q9HUD3_PSEAE	tr|Q9HUD3|Q9HUD3_PSEAE	1	1	1	>tr|Q9HUD3|Q9HUD3_PSEAE Malic enzyme OS=Pseudomonas aeruginosa (strain ATCC 15692 / PAO1 / 1C / PRS 101 / LMG 12228) GN=PA5046 PE=4 SV=1	1	1	1	1	3.3	3.3	3.3	45.428	422	422	0	6.5539	3834200	1				160	5	TRUE	5	8	15	15
tr|Q9HUG0|Q9HUG0_PSEAE	tr|Q9HUG0|Q9HUG0_PSEAE	3	3	3	>tr|Q9HUG0|Q9HUG0_PSEAE Probable carbamoyl transferase OS=Pseudomonas aeruginosa (strain ATCC 15692 / PAO1 / 1C / PRS 101 / LMG 12228) GN=PA5005 PE=4 SV=1	1	3	3	3	7.9	7.9	7.9	66.079	585	585	0	16.794	7347500	1				161	245;652;1024	True;True;True	248;659;1037	416;1132;1814	849;2179;3551	849;2179;3551
tr|Q9HV96|Q9HV96_PSEAE	tr|Q9HV96|Q9HV96_PSEAE	5	5	5	>tr|Q9HV96|Q9HV96_PSEAE Uncharacterized protein OS=Pseudomonas aeruginosa (strain ATCC 15692 / PAO1 / 1C / PRS 101 / LMG 12228) GN=PA4701 PE=4 SV=1	1	5	5	5	13.7	13.7	13.7	58.376	520	520	0	32.786	30934000	6				162	259;433;465;763;955	True;True;True;True;True	262;438;470;774;968	440;441;726;776;1359;1360;1686	891;892;1388;1456;1457;2643;2644;3300	891;1388;1457;2644;3300
tr|Q9HVA0|Q9HVA0_PSEAE	tr|Q9HVA0|Q9HVA0_PSEAE	2	2	2	>tr|Q9HVA0|Q9HVA0_PSEAE Acetolactate synthase OS=Pseudomonas aeruginosa (strain ATCC 15692 / PAO1 / 1C / PRS 101 / LMG 12228) GN=ilvI PE=3 SV=1	1	2	2	2	7	7	7	63.018	574	574	0	14.839	6281800	4				163	16;1107	True;True	16;1120	28;29;1969	64;65;66;3880	65;3880
tr|Q9HVF9|Q9HVF9_PSEAE	tr|Q9HVF9|Q9HVF9_PSEAE	1	1	1	>tr|Q9HVF9|Q9HVF9_PSEAE Uncharacterized protein OS=Pseudomonas aeruginosa (strain ATCC 15692 / PAO1 / 1C / PRS 101 / LMG 12228) GN=PA4632 PE=3 SV=1	1	1	1	1	7.3	7.3	7.3	29.159	273	273	0	6.0461	801740	3				164	128	TRUE	130	214;215	430;431;432	430
tr|Q9HVJ1|Q9HVJ1_PSEAE	tr|Q9HVJ1|Q9HVJ1_PSEAE	4	4	4	>tr|Q9HVJ1|Q9HVJ1_PSEAE Probable ATP-binding component of ABC transporter OS=Pseudomonas aeruginosa (strain ATCC 15692 / PAO1 / 1C / PRS 101 / LMG 12228) GN=PA4595 PE=4 SV=1	1	4	4	4	8.1	8.1	8.1	61.32	554	554	0	28.596	22831000	6				165	438;441;819;1007	True;True;True;True	443;446;830;1020	733;737;738;1448;1779;1780	1400;1405;1406;2801;3488;3489	1400;1406;2801;3489
tr|Q9HVS8|Q9HVS8_PSEAE	tr|Q9HVS8|Q9HVS8_PSEAE	1	1	1	>tr|Q9HVS8|Q9HVS8_PSEAE RoxR OS=Pseudomonas aeruginosa (strain ATCC 15692 / PAO1 / 1C / PRS 101 / LMG 12228) GN=roxR PE=4 SV=1	1	1	1	1	7.5	7.5	7.5	20.616	186	186	0	6.3533	417490	2				166	998	TRUE	1011	1763	3451;3452	3452
tr|Q9HVU0|Q9HVU0_PSEAE	tr|Q9HVU0|Q9HVU0_PSEAE	4	4	4	>tr|Q9HVU0|Q9HVU0_PSEAE Rod shape-determining protein MreB OS=Pseudomonas aeruginosa (strain ATCC 15692 / PAO1 / 1C / PRS 101 / LMG 12228) GN=mreB PE=4 SV=1	1	4	4	4	18.3	18.3	18.3	36.976	345	345	0	29.245	19164000	3				167	359;370;764;822	True;True;True;True	363;374;775;833	610;611;628;1361;1452	1167;1168;1196;2645;2805;2806	1168;1196;2645;2805
tr|Q9HVY5|Q9HVY5_PSEAE	tr|Q9HVY5|Q9HVY5_PSEAE	2	2	2	>tr|Q9HVY5|Q9HVY5_PSEAE Cytochrome b OS=Pseudomonas aeruginosa (strain ATCC 15692 / PAO1 / 1C / PRS 101 / LMG 12228) GN=PA4430 PE=3 SV=1	1	2	2	2	6.7	6.7	6.7	46.072	403	403	0	15.656	32273000	9				168	301;918	True;True	304;930	505;506;1633;1634	998;999;3216;3217;3218;3219;3220;3221;3222	999;3218
tr|Q9HVY6|Q9HVY6_PSEAE	tr|Q9HVY6|Q9HVY6_PSEAE	1	1	1	>tr|Q9HVY6|Q9HVY6_PSEAE Probable cytochrome c1 OS=Pseudomonas aeruginosa (strain ATCC 15692 / PAO1 / 1C / PRS 101 / LMG 12228) GN=PA4429 PE=4 SV=1	1	1	1	1	5.8	5.8	5.8	28.993	260	260	0	8.2943	17668000	3				169	946	TRUE	959	1671;1672	3280;3281;3282	3280
tr|Q9HW15|Q9HW15_PSEAE	tr|Q9HW15|Q9HW15_PSEAE	1	1	1	>tr|Q9HW15|Q9HW15_PSEAE Probable short-chain dehydrogenase OS=Pseudomonas aeruginosa (strain ATCC 15692 / PAO1 / 1C / PRS 101 / LMG 12228) GN=speA PE=4 SV=1	1	1	1	1	3.2	3.2	3.2	26.72	252	252	0.0042735	5.6534	0	1				170	537	TRUE	544	920	1811	1811
tr|Q9HW49|Q9HW49_PSEAE	tr|Q9HW49|Q9HW49_PSEAE	3	3	3	>tr|Q9HW49|Q9HW49_PSEAE Uncharacterized protein OS=Pseudomonas aeruginosa (strain ATCC 15692 / PAO1 / 1C / PRS 101 / LMG 12228) GN=PA4352 PE=3 SV=1	1	3	3	3	22.4	22.4	22.4	30.972	286	286	0	22.403	36431000	20				171	157;966;977	True;True;True	159;979;990	261;262;1707;1728;1729	495;496;497;498;499;500;501;502;3362;3387;3388;3389;3390;3391;3392;3393;3394;3395;3396;3397;3398	500;3362;3395
tr|Q9HW72|Q9HW72_PSEAE	tr|Q9HW72|Q9HW72_PSEAE	1	1	1	>tr|Q9HW72|Q9HW72_PSEAE Pyruvate kinase OS=Pseudomonas aeruginosa (strain ATCC 15692 / PAO1 / 1C / PRS 101 / LMG 12228) GN=pykA PE=3 SV=1	1	1	1	1	5.6	5.6	5.6	52.252	483	483	0	5.9554	6547700	3				172	497	TRUE	504	848;849	1677;1678;1679	1679
tr|Q9HWG9|Q9HWG9_PSEAE	tr|Q9HWG9|Q9HWG9_PSEAE	5	5	5	>tr|Q9HWG9|Q9HWG9_PSEAE Flavin-containing monooxygenase OS=Pseudomonas aeruginosa (strain ATCC 15692 / PAO1 / 1C / PRS 101 / LMG 12228) GN=phzS PE=1 SV=1	1	5	5	5	20.4	20.4	20.4	43.644	402	402	0	41.395	39139000	19				173	239;327;493;653;1101	True;True;True;True;True	242;331;498;499;500;660;1114	408;552;553;840;841;842;843;1133;1961;1962	838;1073;1074;1662;1663;1664;1665;1666;1667;1668;1669;1670;1671;1672;2180;3865;3866;3867;3868	838;1074;1663;2180;3868	14;15	315;318
tr|Q9HWP8|Q9HWP8_PSEAE	tr|Q9HWP8|Q9HWP8_PSEAE	2	2	2	>tr|Q9HWP8|Q9HWP8_PSEAE Cytochrome c oxidase subunit (Cbb3-type) OS=Pseudomonas aeruginosa (strain ATCC 15692 / PAO1 / 1C / PRS 101 / LMG 12228) GN=PA4133 PE=3 SV=1	1	2	2	2	7.6	7.6	7.6	53.318	475	475	0	11.114	8197900	2				174	140;154	True;True	142;156	235;258	458;492	458;492
tr|Q9HWQ0|Q9HWQ0_PSEAE	tr|Q9HWQ0|Q9HWQ0_PSEAE	6	6	6	>tr|Q9HWQ0|Q9HWQ0_PSEAE Probable iron-sulfur protein OS=Pseudomonas aeruginosa (strain ATCC 15692 / PAO1 / 1C / PRS 101 / LMG 12228) GN=PA4131 PE=4 SV=1	1	6	6	6	14.5	14.5	14.5	63.991	573	573	0	52.724	85414000	17				175	53;257;348;455;477;633	True;True;True;True;True;True	54;260;352;460;482;640	93;94;437;438;590;591;762;817;818;1101;1102	207;208;886;887;888;889;1129;1130;1131;1132;1440;1627;1628;1629;2126;2127;2128	207;888;1131;1440;1629;2126
tr|Q9I2C4|Q9I2C4_PSEAE;tr|Q9HX05|Q9HX05_PSEAE	tr|Q9I2C4|Q9I2C4_PSEAE;tr|Q9HX05|Q9HX05_PSEAE	3;3	3;3	3;3	>tr|Q9I2C4|Q9I2C4_PSEAE NAD+ dependent aldehyde dehydrogenase ExaC OS=Pseudomonas aeruginosa (strain ATCC 15692 / PAO1 / 1C / PRS 101 / LMG 12228) GN=exaC PE=3 SV=1;>tr|Q9HX05|Q9HX05_PSEAE Probable aldehyde dehydrogenase OS=Pseudomonas aeruginosa (strain A	2	3	3	3	9.7	9.7	9.7	54.892	506	506;506	0	22.391	21509000	7				176	97;556;1099	True;True;True	99;563;1112	167;949;1957;1958	343;344;1843;1844;3859;3860;3861	344;1843;3861
tr|Q9HX44|Q9HX44_PSEAE	tr|Q9HX44|Q9HX44_PSEAE	1	1	1	>tr|Q9HX44|Q9HX44_PSEAE Probable acyl-CoA dehydrogenase OS=Pseudomonas aeruginosa (strain ATCC 15692 / PAO1 / 1C / PRS 101 / LMG 12228) GN=PA3972 PE=3 SV=1	1	1	1	1	5.1	5.1	5.1	60.338	549	549	0	9.0541	1441900	3				177	999	TRUE	1012	1764	3453;3454;3455	3454
tr|Q9HY01|Q9HY01_PSEAE	tr|Q9HY01|Q9HY01_PSEAE	2	2	2	>tr|Q9HY01|Q9HY01_PSEAE S-(hydroxymethyl)glutathione dehydrogenase OS=Pseudomonas aeruginosa (strain ATCC 15692 / PAO1 / 1C / PRS 101 / LMG 12228) GN=adhC PE=3 SV=1	1	2	2	2	7	7	7	39.208	370	370	0	11.844	11300000	2				178	246;445	True;True	249;450	417;418;743	850;851;1411	850;1411
tr|Q9HY13|Q9HY13_PSEAE	tr|Q9HY13|Q9HY13_PSEAE	11	11	11	>tr|Q9HY13|Q9HY13_PSEAE Uncharacterized protein OS=Pseudomonas aeruginosa (strain ATCC 15692 / PAO1 / 1C / PRS 101 / LMG 12228) GN=PA3613 PE=4 SV=1	1	11	11	11	20.3	20.3	20.3	88.378	801	801	0	81.434	73640000	22				179	159;342;550;665;873;876;877;925;982;1003;1113	True;True;True;True;True;True;True;True;True;True;True	161;346;557;673;885;888;889;937;995;1016;1126	264;265;578;941;1158;1159;1544;1549;1550;1551;1641;1736;1737;1772;1773;1979	504;505;1111;1834;2237;2238;3012;3013;3019;3020;3021;3022;3023;3235;3236;3237;3406;3407;3480;3481;3482;3894	504;1111;1834;2238;3012;3019;3023;3235;3406;3482;3894
tr|Q9HY81|Q9HY81_PSEAE	tr|Q9HY81|Q9HY81_PSEAE	2	2	2	>tr|Q9HY81|Q9HY81_PSEAE Probable peroxidase OS=Pseudomonas aeruginosa (strain ATCC 15692 / PAO1 / 1C / PRS 101 / LMG 12228) GN=PA3529 PE=1 SV=1	1	2	2	2	12	12	12	21.822	200	200	0	17.483	27146000	4				180	162;850	True;True	164;862	270;1498;1499	512;513;2887;2888	513;2887
tr|Q9HYR4|Q9HYR4_PSEAE	tr|Q9HYR4|Q9HYR4_PSEAE	1	1	1	>tr|Q9HYR4|Q9HYR4_PSEAE Cytochrome P450 OS=Pseudomonas aeruginosa (strain ATCC 15692 / PAO1 / 1C / PRS 101 / LMG 12228) GN=PA3331 PE=3 SV=1	1	1	1	1	5.3	5.3	5.3	46.377	418	418	0	6.7427	1675700	1				181	305	TRUE	308	514	1012	1012
tr|Q9HYR6|Q9HYR6_PSEAE	tr|Q9HYR6|Q9HYR6_PSEAE	2	2	2	>tr|Q9HYR6|Q9HYR6_PSEAE Uncharacterized protein OS=Pseudomonas aeruginosa (strain ATCC 15692 / PAO1 / 1C / PRS 101 / LMG 12228) GN=PA3329 PE=4 SV=1	1	2	2	2	10.9	10.9	10.9	49.134	442	442	0	13.795	14256000	3				182	174;530	True;True	176;537	293;909;910	563;1796;1797	563;1797
tr|Q9HYR7|Q9HYR7_PSEAE	tr|Q9HYR7|Q9HYR7_PSEAE	2	2	2	>tr|Q9HYR7|Q9HYR7_PSEAE Probable FAD-dependent monooxygenase OS=Pseudomonas aeruginosa (strain ATCC 15692 / PAO1 / 1C / PRS 101 / LMG 12228) GN=PA3328 PE=4 SV=1	1	2	2	2	7.7	7.7	7.7	42.498	388	388	0	20.521	15888000	6				183	130;148	True;True	132;150	218;219;248;249	436;437;478;479;480;481	436;479
tr|Q9HYR8|Q9HYR8_PSEAE	tr|Q9HYR8|Q9HYR8_PSEAE	26	26	26	>tr|Q9HYR8|Q9HYR8_PSEAE Probable non-ribosomal peptide synthetase OS=Pseudomonas aeruginosa (strain ATCC 15692 / PAO1 / 1C / PRS 101 / LMG 12228) GN=PA3327 PE=4 SV=1	1	26	26	26	15.9	15.9	15.9	259.4	2352	2352	0	178.39	208960000	51				184	44;49;90;91;169;212;221;300;364;396;419;427;461;536;555;569;628;708;756;818;849;853;870;902;1009;1075	True;True;True;True;True;True;True;True;True;True;True;True;True;True;True;True;True;True;True;True;True;True;True;True;True;True	44;49;92;93;171;215;224;303;368;401;424;432;466;543;562;576;635;717;767;829;861;865;882;914;1022;1088	77;85;86;158;159;280;281;364;378;504;619;670;703;717;770;919;948;975;1094;1235;1346;1446;1447;1496;1497;1502;1503;1536;1537;1607;1608;1609;1783;1784;1899	169;170;182;183;184;185;186;187;188;189;329;330;331;332;333;525;526;527;757;782;783;997;1184;1276;1342;1377;1450;1810;1842;1906;2118;2395;2611;2799;2800;2883;2884;2885;2886;2892;2893;2981;2982;2983;3170;3171;3172;3173;3174;3492;3493;3494;3495;3697	170;182;329;331;525;757;782;997;1184;1276;1342;1377;1450;1810;1842;1906;2118;2395;2611;2799;2885;2893;2982;3170;3495;3697
tr|Q9HYT5|Q9HYT5_PSEAE	tr|Q9HYT5|Q9HYT5_PSEAE	4	4	4	>tr|Q9HYT5|Q9HYT5_PSEAE Uncharacterized protein OS=Pseudomonas aeruginosa (strain ATCC 15692 / PAO1 / 1C / PRS 101 / LMG 12228) GN=PA3309 PE=3 SV=1	1	4	4	4	33.1	33.1	33.1	16.496	151	151	0	32.558	116720000	16				185	404;467;611;993	True;True;True;True	409;472;618;1006	683;778;779;1066;1067;1755;1756	1316;1317;1459;1460;1461;1462;1463;2074;2075;2076;2077;3436;3437;3438;3439;3440	1317;1462;2076;3436
tr|Q9HYZ6|Q9HYZ6_PSEAE	tr|Q9HYZ6|Q9HYZ6_PSEAE	2	2	2	>tr|Q9HYZ6|Q9HYZ6_PSEAE Site-determining protein OS=Pseudomonas aeruginosa (strain ATCC 15692 / PAO1 / 1C / PRS 101 / LMG 12228) GN=minD PE=3 SV=1	1	2	2	2	10	10	10	29.635	271	271	0	12.7	20428000	3				186	600;937	True;True	607;950	1048;1049;1659	2039;2040;3265	2040;3265
tr|Q9HZ78|Q9HZ78_PSEAE	tr|Q9HZ78|Q9HZ78_PSEAE	3	3	3	>tr|Q9HZ78|Q9HZ78_PSEAE LPS biosynthesis protein WbpG OS=Pseudomonas aeruginosa (strain ATCC 15692 / PAO1 / 1C / PRS 101 / LMG 12228) GN=wbpG PE=4 SV=1	1	3	3	3	9	9	9	43.503	377	377	0	20.985	20045000	6				187	29;564;942	True;True;True	29;571;955	53;963;964;1665	110;1866;1867;1868;1869;3271	110;1869;3271
tr|Q9HZA6|Q9HZA6_PSEAE	tr|Q9HZA6|Q9HZA6_PSEAE	1	1	1	>tr|Q9HZA6|Q9HZA6_PSEAE Motility protein FimV OS=Pseudomonas aeruginosa (strain ATCC 15692 / PAO1 / 1C / PRS 101 / LMG 12228) GN=fimV PE=1 SV=1	1	1	1	1	1.8	1.8	1.8	96.928	919	919	0.0043103	5.6617	333610	1				188	723	TRUE	734	1266	2457	2457
tr|Q9HZC5|Q9HZC5_PSEAE	tr|Q9HZC5|Q9HZC5_PSEAE	3	3	3	>tr|Q9HZC5|Q9HZC5_PSEAE Aminopeptidase N OS=Pseudomonas aeruginosa (strain ATCC 15692 / PAO1 / 1C / PRS 101 / LMG 12228) GN=pepN PE=4 SV=1	1	3	3	3	5	5	5	100.05	885	885	0	18.374	4343200	3				189	309;311;458	True;True;True	313;315;463	525;526;528;765	1040;1041;1043;1444	1040;1043;1444
tr|Q9HZI0|Q9HZI0_PSEAE	tr|Q9HZI0|Q9HZI0_PSEAE	1	1	1	>tr|Q9HZI0|Q9HZI0_PSEAE Uncharacterized protein OS=Pseudomonas aeruginosa (strain ATCC 15692 / PAO1 / 1C / PRS 101 / LMG 12228) GN=PA3026 PE=4 SV=1	1	1	1	1	1.9	1.9	1.9	58.019	531	531	0.0042194	5.5625	33952000	1				190	792	TRUE	803	1403	2722	2722
tr|Q9HZK4|Q9HZK4_PSEAE	tr|Q9HZK4|Q9HZK4_PSEAE	10	10	10	>tr|Q9HZK4|Q9HZK4_PSEAE Glyceraldehyde-3-phosphate dehydrogenase OS=Pseudomonas aeruginosa (strain ATCC 15692 / PAO1 / 1C / PRS 101 / LMG 12228) GN=PA3001 PE=3 SV=1	1	10	10	10	27.3	27.3	27.3	50.111	461	461	0	75.672	148020000	22				191	25;219;230;565;676;727;810;831;1016;1029	True;True;True;True;True;True;True;True;True;True	25;222;233;572;685;738;821;842;1029;1042	47;375;376;392;393;965;966;1179;1180;1295;1431;1432;1468;1797;1798;1823;1824	102;779;780;811;812;1870;1871;2307;2308;2534;2772;2773;2774;2775;2825;3513;3514;3562;3563;3564;3565;3566	102;779;811;1871;2308;2534;2773;2825;3514;3563
tr|Q9HZV6|Q9HZV6_PSEAE	tr|Q9HZV6|Q9HZV6_PSEAE	1	1	1	>tr|Q9HZV6|Q9HZV6_PSEAE Geranyl-CoA carboxylase, alpha-subunit (Biotin-containing) OS=Pseudomonas aeruginosa (strain ATCC 15692 / PAO1 / 1C / PRS 101 / LMG 12228) GN=atuF PE=4 SV=1	1	1	1	1	1.4	1.4	1.4	71.747	661	661	0	6.3873	3290000	1				192	314	TRUE	318	532	1049	1049
tr|Q9I015|Q9I015_PSEAE	tr|Q9I015|Q9I015_PSEAE	1	1	1	>tr|Q9I015|Q9I015_PSEAE Probable aminotransferase OS=Pseudomonas aeruginosa (strain ATCC 15692 / PAO1 / 1C / PRS 101 / LMG 12228) GN=PA2828 PE=4 SV=1	1	1	1	1	3	3	3	44.799	403	403	0	6.0436	483380	1				193	747	TRUE	758	1330	2579	2579
tr|Q9I028|Q9I028_PSEAE	tr|Q9I028|Q9I028_PSEAE	4	4	4	>tr|Q9I028|Q9I028_PSEAE Probable acyl-CoA dehydrogenase OS=Pseudomonas aeruginosa (strain ATCC 15692 / PAO1 / 1C / PRS 101 / LMG 12228) GN=PA2815 PE=4 SV=1	1	4	4	4	10.6	10.6	10.6	88.762	815	815	0	30.449	39734000	8				194	261;567;1032;1105	True;True;True;True	264;574;1045;1118	444;969;970;1828;1829;1966	895;1875;1876;1877;3572;3573;3574;3575;3872	895;1875;3575;3872
tr|Q9I056|Q9I056_PSEAE	tr|Q9I056|Q9I056_PSEAE	1	1	1	>tr|Q9I056|Q9I056_PSEAE Carboxypeptidase G2 OS=Pseudomonas aeruginosa (strain ATCC 15692 / PAO1 / 1C / PRS 101 / LMG 12228) GN=cpg2 PE=4 SV=1	1	1	1	1	3.4	3.4	3.4	44.007	412	412	0	6.3192	17723000	12				195	672	TRUE	680	1169;1170	2260;2261;2262;2263;2264;2265;2266;2267;2268;2269;2270;2271	2268
tr|Q9I0L4|Q9I0L4_PSEAE	tr|Q9I0L4|Q9I0L4_PSEAE	6	6	6	>tr|Q9I0L4|Q9I0L4_PSEAE Isocitrate dehydrogenase OS=Pseudomonas aeruginosa (strain ATCC 15692 / PAO1 / 1C / PRS 101 / LMG 12228) GN=idh PE=4 SV=1	1	6	6	6	11.9	11.9	11.9	81.633	741	741	0	45.947	52255000	13				196	152;204;338;358;462;1057	True;True;True;True;True;True	154;207;342;362;467;1070	255;256;348;349;571;572;609;771;772;1868	489;490;719;720;721;722;723;1101;1102;1166;1451;1452;3650	489;722;1102;1166;1451;3650
tr|Q9I0L5|Q9I0L5_PSEAE	tr|Q9I0L5|Q9I0L5_PSEAE	12	12	12	>tr|Q9I0L5|Q9I0L5_PSEAE Isocitrate dehydrogenase [NADP] OS=Pseudomonas aeruginosa (strain ATCC 15692 / PAO1 / 1C / PRS 101 / LMG 12228) GN=icd PE=3 SV=1	1	12	12	12	33	33	33	45.577	418	418	0	105	252900000	42				197	95;138;203;205;308;372;405;755;944;1022;1071;1086	True;True;True;True;True;True;True;True;True;True;True;True	97;140;206;208;312;376;410;766;957;1035;1084;1099	164;165;231;232;347;350;351;523;524;631;632;684;685;1344;1345;1668;1669;1810;1811;1892;1893;1917	338;339;340;341;451;452;453;718;724;725;726;727;1036;1037;1038;1039;1203;1204;1318;1319;1320;2606;2607;2608;2609;2610;3277;3278;3535;3536;3537;3538;3539;3540;3541;3542;3543;3544;3545;3546;3688;3689;3719	340;452;718;726;1038;1204;1319;2607;3278;3536;3688;3719
tr|Q9I0T1|Q9I0T1_PSEAE	tr|Q9I0T1|Q9I0T1_PSEAE	12	12	12	>tr|Q9I0T1|Q9I0T1_PSEAE Probable acyl-CoA thiolase OS=Pseudomonas aeruginosa (strain ATCC 15692 / PAO1 / 1C / PRS 101 / LMG 12228) GN=PA2553 PE=3 SV=1	1	12	12	12	42.7	42.7	42.7	41.4	396	396	0	99.953	144540000	25				198	86;202;214;227;307;361;504;654;775;919;920;927	True;True;True;True;True;True;True;True;True;True;True;True	88;205;217;230;311;365;511;661;786;931;932;940	152;345;346;367;368;387;521;522;614;615;858;859;1134;1135;1377;1635;1636;1645	320;715;716;717;764;765;766;767;795;1034;1035;1179;1180;1689;1690;1691;1692;1693;2181;2182;2676;3223;3224;3225;3226;3227;3241	320;715;765;795;1034;1179;1690;2181;2676;3223;3226;3241
tr|Q9I0T2|Q9I0T2_PSEAE	tr|Q9I0T2|Q9I0T2_PSEAE	1	1	1	>tr|Q9I0T2|Q9I0T2_PSEAE Probable acyl-CoA dehydrogenase OS=Pseudomonas aeruginosa (strain ATCC 15692 / PAO1 / 1C / PRS 101 / LMG 12228) GN=PA2552 PE=3 SV=1	1	1	1	1	2.7	2.7	2.7	40.908	375	375	0	6.4923	2971900	1				199	413	TRUE	418	694	1329	1329
tr|Q9I120|Q9I120_PSEAE	tr|Q9I120|Q9I120_PSEAE	2	2	2	>tr|Q9I120|Q9I120_PSEAE Uncharacterized protein OS=Pseudomonas aeruginosa (strain ATCC 15692 / PAO1 / 1C / PRS 101 / LMG 12228) GN=PA2462 PE=4 SV=1	1	2	2	2	0.5	0.5	0.5	573.17	5627	5627	0	10.535	8852600	1				200	779;898	True;True	790;910	1384;1601	2691;3162	2691;3162
tr|Q9I1H3|Q9I1H3_PSEAE	tr|Q9I1H3|Q9I1H3_PSEAE	6	6	6	>tr|Q9I1H3|Q9I1H3_PSEAE AmbE OS=Pseudomonas aeruginosa (strain ATCC 15692 / PAO1 / 1C / PRS 101 / LMG 12228) GN=ambE PE=4 SV=1	1	6	6	6	4.5	4.5	4.5	229.04	2124	2124	0	37.239	24497000	6				201	0;82;602;623;945;962	True;True;True;True;True;True	0;84;609;630;958;975	0;147;1051;1052;1087;1670;1702	0;1;309;2042;2043;2107;3279;3353	1;309;2043;2107;3279;3353
tr|Q9I1I5|Q9I1I5_PSEAE	tr|Q9I1I5|Q9I1I5_PSEAE	2	2	2	>tr|Q9I1I5|Q9I1I5_PSEAE Glucose dehydrogenase OS=Pseudomonas aeruginosa (strain ATCC 15692 / PAO1 / 1C / PRS 101 / LMG 12228) GN=gcd PE=4 SV=1	1	2	2	2	5.1	5.1	5.1	86.217	803	803	0	10.531	4500800	2				202	271;892	True;True	274;904	458;1594	916;3152	916;3152
tr|Q9I1N7|Q9I1N7_PSEAE	tr|Q9I1N7|Q9I1N7_PSEAE	2	2	2	>tr|Q9I1N7|Q9I1N7_PSEAE PslB OS=Pseudomonas aeruginosa (strain ATCC 15692 / PAO1 / 1C / PRS 101 / LMG 12228) GN=pslB PE=3 SV=1	1	2	2	2	6.6	6.6	6.6	53.515	488	488	0	27.75	4769600	3				203	30;253	True;True	30;256	54;430;431	111;877;878	111;878
tr|Q9I1Z6|Q9I1Z6_PSEAE	tr|Q9I1Z6|Q9I1Z6_PSEAE	3	3	3	>tr|Q9I1Z6|Q9I1Z6_PSEAE Alcohol dehydrogenase (Zn-dependent) OS=Pseudomonas aeruginosa (strain ATCC 15692 / PAO1 / 1C / PRS 101 / LMG 12228) GN=PA2119 PE=3 SV=1	1	3	3	3	9	9	9	38.561	366	366	0	18.085	6981500	3				204	547;582;604	True;True;True	554;589;611	938;1004;1055	1831;1961;2048	1831;1961;2048
tr|Q9I246|Q9I246_PSEAE	tr|Q9I246|Q9I246_PSEAE	7	7	7	>tr|Q9I246|Q9I246_PSEAE Probable carbamoyl transferase OS=Pseudomonas aeruginosa (strain ATCC 15692 / PAO1 / 1C / PRS 101 / LMG 12228) GN=PA2069 PE=4 SV=1	1	7	7	7	18.1	18.1	18.1	63.382	574	574	0	54.27	69841000	17				205	177;267;406;491;606;808;825	True;True;True;True;True;True;True	179;270;411;496;613;819;836	296;453;454;686;837;838;1057;1058;1425;1426;1427;1428;1456;1457	566;911;912;1321;1659;1660;2051;2052;2763;2764;2765;2766;2767;2768;2769;2811;2812	566;911;1321;1660;2051;2763;2811
tr|Q9I296|Q9I296_PSEAE	tr|Q9I296|Q9I296_PSEAE	2	2	2	>tr|Q9I296|Q9I296_PSEAE Putative isovaleryl-CoA dehydrogenase OS=Pseudomonas aeruginosa (strain ATCC 15692 / PAO1 / 1C / PRS 101 / LMG 12228) GN=liuA PE=3 SV=1	1	2	2	2	7	7	7	42.209	387	387	0	10.941	5365800	1				206	336;719	True;True	340;730	568;1260	1096;2448	1096;2448
tr|Q9I297|Q9I297_PSEAE	tr|Q9I297|Q9I297_PSEAE	1	1	1	>tr|Q9I297|Q9I297_PSEAE Methylcrotonyl-CoA carboxylase, beta-subunit OS=Pseudomonas aeruginosa (strain ATCC 15692 / PAO1 / 1C / PRS 101 / LMG 12228) GN=liuB PE=1 SV=1	1	1	1	1	3.4	3.4	3.4	57.433	535	535	0	8.4139	3224800	1				207	354	TRUE	358	601	1151	1151
tr|Q9I299|Q9I299_PSEAE	tr|Q9I299|Q9I299_PSEAE	10	10	10	>tr|Q9I299|Q9I299_PSEAE Methylcrotonyl-CoA carboxylase, alpha-subunit (Biotin-containing) OS=Pseudomonas aeruginosa (strain ATCC 15692 / PAO1 / 1C / PRS 101 / LMG 12228) GN=liuD PE=1 SV=1	1	10	10	10	23.4	23.4	23.4	71.282	655	655	0	64.257	48758000	11				208	77;85;207;442;444;549;585;597;668;1051	True;True;True;True;True;True;True;True;True;True	79;87;210;447;449;556;592;604;676;1064	141;151;354;739;742;940;1009;1043;1164;1860	292;318;319;732;1407;1410;1833;1967;2033;2249;3631;3632	292;319;732;1407;1410;1833;1967;2033;2249;3631
tr|Q9I2A9|Q9I2A9_PSEAE	tr|Q9I2A9|Q9I2A9_PSEAE	1	1	1	>tr|Q9I2A9|Q9I2A9_PSEAE DhcB, dehydrocarnitine CoA transferase, subunit B OS=Pseudomonas aeruginosa (strain ATCC 15692 / PAO1 / 1C / PRS 101 / LMG 12228) GN=dhcB PE=4 SV=1	1	1	1	1	11	11	11	23.187	218	218	0	9.0587	5713600	6				209	371	TRUE	375	629;630	1197;1198;1199;1200;1201;1202	1198
tr|Q9I2V3|Q9I2V3_PSEAE	tr|Q9I2V3|Q9I2V3_PSEAE	1	1	1	>tr|Q9I2V3|Q9I2V3_PSEAE Uncharacterized protein OS=Pseudomonas aeruginosa (strain ATCC 15692 / PAO1 / 1C / PRS 101 / LMG 12228) GN=PA1789 PE=1 SV=1	1	1	1	1	5.2	5.2	5.2	31.273	287	287	0	6.0618	2494400	1				210	457	TRUE	462	764	1443	1443
tr|Q9I2W9|Q9I2W9_PSEAE	tr|Q9I2W9|Q9I2W9_PSEAE	4	4	4	>tr|Q9I2W9|Q9I2W9_PSEAE Phosphoenolpyruvate synthase OS=Pseudomonas aeruginosa (strain ATCC 15692 / PAO1 / 1C / PRS 101 / LMG 12228) GN=ppsA PE=3 SV=1	1	4	4	4	7	7	7	85.816	791	791	0	36.376	37577000	7				211	36;268;280;735	True;True;True;True	36;271;283;746	64;65;455;473;474;1308	132;133;134;913;958;959;2550	134;913;959;2550
tr|Q9I2Z5|Q9I2Z5_PSEAE	tr|Q9I2Z5|Q9I2Z5_PSEAE	1	1	1	>tr|Q9I2Z5|Q9I2Z5_PSEAE Probable amidotransferase OS=Pseudomonas aeruginosa (strain ATCC 15692 / PAO1 / 1C / PRS 101 / LMG 12228) GN=PA1742 PE=4 SV=1	1	1	1	1	7.1	7.1	7.1	27.361	240	240	1	-2	0	1	+			212	132	TRUE	134	221	439	439	16	121
tr|Q9I3B2|Q9I3B2_PSEAE	tr|Q9I3B2|Q9I3B2_PSEAE	3	3	3	>tr|Q9I3B2|Q9I3B2_PSEAE Beta-ketoacyl-ACP synthase I OS=Pseudomonas aeruginosa (strain ATCC 15692 / PAO1 / 1C / PRS 101 / LMG 12228) GN=fabB PE=3 SV=1	1	3	3	3	9.4	9.4	9.4	42.806	405	405	0	26.596	40371000	11				213	197;269;302	True;True;True	200;272;305	338;339;456;507;508	701;702;703;704;705;706;914;1000;1001;1002;1003	705;914;1000
tr|Q9I3D3|Q9I3D3_PSEAE	tr|Q9I3D3|Q9I3D3_PSEAE	15	15	15	>tr|Q9I3D3|Q9I3D3_PSEAE 2-oxoglutarate dehydrogenase (E1 subunit) OS=Pseudomonas aeruginosa (strain ATCC 15692 / PAO1 / 1C / PRS 101 / LMG 12228) GN=sucA PE=4 SV=1	1	15	15	15	21.6	21.6	21.6	105.88	943	943	0	124.23	215220000	59				214	123;173;181;244;255;291;368;500;621;622;642;675;697;800;854	True;True;True;True;True;True;True;True;True;True;True;True;True;True;True	125;175;183;247;258;294;372;507;628;629;649;683;684;706;811;866	207;291;292;303;304;415;433;434;491;492;625;626;853;1083;1084;1085;1086;1119;1175;1176;1177;1178;1215;1216;1416;1504	421;558;559;560;561;562;590;591;592;848;880;881;882;883;976;977;1193;1194;1683;2100;2101;2102;2103;2104;2105;2106;2161;2282;2283;2284;2285;2286;2287;2288;2289;2290;2291;2292;2293;2294;2295;2296;2297;2298;2299;2300;2301;2302;2303;2304;2305;2306;2360;2361;2362;2363;2364;2752;2894	421;561;591;848;880;976;1193;1683;2100;2103;2161;2292;2361;2752;2894	17	592
tr|Q9I3D4|Q9I3D4_PSEAE	tr|Q9I3D4|Q9I3D4_PSEAE	5	5	5	>tr|Q9I3D4|Q9I3D4_PSEAE Succinate dehydrogenase (B subunit) OS=Pseudomonas aeruginosa (strain ATCC 15692 / PAO1 / 1C / PRS 101 / LMG 12228) GN=sdhB PE=4 SV=1	1	5	5	5	26	26	26	26.155	235	235	0	36.023	93272000	17				215	296;542;660;701;996	True;True;True;True;True	299;549;668;710;1009	499;500;929;930;1148;1149;1222;1223;1760;1761	988;989;990;991;992;1820;1821;1822;1823;2224;2225;2371;2372;2373;3447;3448;3449	989;1822;2224;2372;3448
tr|Q9I3D5|Q9I3D5_PSEAE	tr|Q9I3D5|Q9I3D5_PSEAE	14	14	14	>tr|Q9I3D5|Q9I3D5_PSEAE Succinate dehydrogenase flavoprotein subunit OS=Pseudomonas aeruginosa (strain ATCC 15692 / PAO1 / 1C / PRS 101 / LMG 12228) GN=sdhA PE=3 SV=1	1	14	14	14	29	29	29	63.531	590	590	0	138.28	577540000	78				216	319;320;324;345;422;423;470;505;507;551;576;740;894;928	True;True;True;True;True;True;True;True;True;True;True;True;True;True	323;324;328;349;427;428;475;512;514;558;583;751;906;941	538;539;540;541;547;548;584;585;706;707;708;709;710;711;784;785;860;861;863;864;942;984;985;986;987;988;989;990;991;992;993;994;995;1316;1317;1596;1646;1647	1057;1058;1059;1060;1068;1069;1119;1120;1121;1122;1123;1346;1347;1348;1349;1350;1351;1352;1353;1354;1355;1356;1357;1358;1359;1360;1361;1362;1363;1364;1365;1366;1367;1368;1369;1370;1478;1479;1694;1695;1696;1697;1698;1699;1700;1702;1703;1835;1921;1922;1923;1924;1925;1926;1927;1928;1929;1930;1931;1932;1933;1934;1935;1936;1937;1938;1939;1940;1941;1942;1943;1944;1945;1946;2561;2562;2563;3154;3242;3243	1057;1059;1069;1119;1350;1364;1479;1695;1703;1835;1921;2563;3154;3243
tr|Q9I3G0|Q9I3G0_PSEAE	tr|Q9I3G0|Q9I3G0_PSEAE	2	2	2	>tr|Q9I3G0|Q9I3G0_PSEAE Cytochrome c oxidase, cbb3-type, CcoN subunit OS=Pseudomonas aeruginosa (strain ATCC 15692 / PAO1 / 1C / PRS 101 / LMG 12228) GN=ccoN2 PE=3 SV=1	1	2	2	2	6.1	6.1	6.1	53.09	475	475	0	13.006	30543000	8				217	857;943	True;True	869;956	1512;1513;1666;1667	2931;2932;2933;3272;3273;3274;3275;3276	2931;3272
tr|Q9I3G1|Q9I3G1_PSEAE;tr|Q9I3G4|Q9I3G4_PSEAE	tr|Q9I3G1|Q9I3G1_PSEAE	3;1	3;1	3;1	>tr|Q9I3G1|Q9I3G1_PSEAE Cytochrome c oxidase, cbb3-type, CcoO subunit OS=Pseudomonas aeruginosa (strain ATCC 15692 / PAO1 / 1C / PRS 101 / LMG 12228) GN=ccoO2 PE=4 SV=1	2	3	3	3	21.8	21.8	21.8	22.778	202	202;203	0	31.02	44326000	12				218	706;886;910	True;True;True	715;898;922	1232;1568;1569;1570;1571;1619	2390;3059;3060;3061;3062;3063;3064;3065;3066;3067;3068;3185	2390;3059;3185
tr|Q9I3G2|Q9I3G2_PSEAE	tr|Q9I3G2|Q9I3G2_PSEAE	6	6	6	>tr|Q9I3G2|Q9I3G2_PSEAE Cbb3-type cytochrome c oxidase subunit OS=Pseudomonas aeruginosa (strain ATCC 15692 / PAO1 / 1C / PRS 101 / LMG 12228) GN=ccoP2 PE=3 SV=1	1	6	6	6	31.8	31.8	31.8	33.812	308	308	0	38.312	82508000	11				219	316;379;387;885;1072;1081	True;True;True;True;True;True	320;383;392;897;1085;1094	534;640;655;656;1565;1566;1567;1894;1895;1908;1909	1051;1214;1250;1251;1252;1253;3056;3057;3058;3690;3691;3706;3707	1051;1214;1252;3057;3690;3706
tr|Q9I3G3|Q9I3G3_PSEAE	tr|Q9I3G3|Q9I3G3_PSEAE	2	2	2	>tr|Q9I3G3|Q9I3G3_PSEAE Cytochrome c oxidase, cbb3-type, CcoN subunit OS=Pseudomonas aeruginosa (strain ATCC 15692 / PAO1 / 1C / PRS 101 / LMG 12228) GN=ccoN1 PE=3 SV=1	1	2	2	2	8.4	8.4	8.4	53.108	475	475	0	12.032	23192000	8				220	6;153	True;True	6;155	9;10;257	16;17;18;19;20;21;22;491	17;491
tr|Q9I3G6|Q9I3G6_PSEAE	tr|Q9I3G6|Q9I3G6_PSEAE	2	2	2	>tr|Q9I3G6|Q9I3G6_PSEAE Probable ferredoxin OS=Pseudomonas aeruginosa (strain ATCC 15692 / PAO1 / 1C / PRS 101 / LMG 12228) GN=PA1551 PE=4 SV=1	1	2	2	2	4.9	4.9	4.9	53.62	471	471	0	16.322	11266000	3				221	366;426	True;True	370;431	622;715;716	1188;1375;1376	1188;1375
tr|Q9I3X2|Q9I3X2_PSEAE	tr|Q9I3X2|Q9I3X2_PSEAE	2	2	2	>tr|Q9I3X2|Q9I3X2_PSEAE Uncharacterized protein OS=Pseudomonas aeruginosa (strain ATCC 15692 / PAO1 / 1C / PRS 101 / LMG 12228) GN=PA1372 PE=4 SV=1	1	2	2	2	3.8	3.8	3.8	79.82	711	711	0	17.084	8421300	3				222	560;744	True;True	567;755	956;1324;1325	1853;2573;2574	1853;2573
tr|Q9I4I1|Q9I4I1_PSEAE	tr|Q9I4I1|Q9I4I1_PSEAE	4	4	4	>tr|Q9I4I1|Q9I4I1_PSEAE Ribonucleoside-diphosphate reductase OS=Pseudomonas aeruginosa (strain ATCC 15692 / PAO1 / 1C / PRS 101 / LMG 12228) GN=nrdA PE=3 SV=1	1	4	4	4	7	7	7	107.11	963	963	0	27.979	16179000	8				223	22;277;724;1058	True;True;True;True	22;280;735;1071	42;43;469;1267;1268;1869;1870	94;95;942;2458;2459;2460;3651;3652	94;942;2458;3651
tr|Q9I4M1|Q9I4M1_PSEAE	tr|Q9I4M1|Q9I4M1_PSEAE	1	1	1	>tr|Q9I4M1|Q9I4M1_PSEAE Uncharacterized protein OS=Pseudomonas aeruginosa (strain ATCC 15692 / PAO1 / 1C / PRS 101 / LMG 12228) GN=PA1114 PE=4 SV=1	1	1	1	1	16.2	16.2	16.2	12.496	111	111	1	-2	28563000	1	+			224	60	TRUE	61	105	227	227	18	49
tr|Q9I4X1|Q9I4X1_PSEAE	tr|Q9I4X1|Q9I4X1_PSEAE	4	4	4	>tr|Q9I4X1|Q9I4X1_PSEAE PqsC OS=Pseudomonas aeruginosa (strain ATCC 15692 / PAO1 / 1C / PRS 101 / LMG 12228) GN=pqsC PE=1 SV=1	1	4	4	4	16.4	16.4	16.4	38.238	348	348	0	29.984	48790000	14				225	47;625;670;737	True;True;True;True	47;632;678;748	81;82;1089;1090;1166;1311;1312	174;175;176;177;178;179;2110;2111;2112;2113;2251;2252;2553;2554	179;2113;2251;2553
tr|Q9I4X2|Q9I4X2_PSEAE	tr|Q9I4X2|Q9I4X2_PSEAE	1	1	1	>tr|Q9I4X2|Q9I4X2_PSEAE PqsB OS=Pseudomonas aeruginosa (strain ATCC 15692 / PAO1 / 1C / PRS 101 / LMG 12228) GN=pqsB PE=1 SV=1	1	1	1	1	5.3	5.3	5.3	30.5	283	283	0	6.4173	4667800	1				226	98	TRUE	100	168	345	345
tr|Q9I5F6|Q9I5F6_PSEAE	tr|Q9I5F6|Q9I5F6_PSEAE	14	14	14	>tr|Q9I5F6|Q9I5F6_PSEAE Bifunctional protein PutA OS=Pseudomonas aeruginosa (strain ATCC 15692 / PAO1 / 1C / PRS 101 / LMG 12228) GN=putA PE=3 SV=1	1	14	14	14	16.5	16.5	16.5	115.63	1060	1060	0	117.38	71249000	25				227	46;168;526;659;758;765;839;954;1010;1017;1030;1039;1080;1082	True;True;True;True;True;True;True;True;True;True;True;True;True;True	46;170;533;667;769;776;850;967;1023;1030;1043;1052;1093;1095	80;279;903;1146;1147;1349;1362;1478;1683;1684;1685;1785;1786;1799;1800;1825;1840;1841;1907;1910	173;524;1788;2221;2222;2223;2617;2646;2837;3297;3298;3299;3496;3497;3498;3499;3515;3516;3567;3568;3602;3603;3604;3605;3705;3708	173;524;1788;2221;2617;2646;2837;3298;3498;3515;3568;3603;3705;3708
tr|Q9I5I5|Q9I5I5_PSEAE	tr|Q9I5I5|Q9I5I5_PSEAE	1	1	1	>tr|Q9I5I5|Q9I5I5_PSEAE Probable enoyl-CoA hydratase/isomerase OS=Pseudomonas aeruginosa (strain ATCC 15692 / PAO1 / 1C / PRS 101 / LMG 12228) GN=PA0744 PE=4 SV=1	1	1	1	1	2.7	2.7	2.7	40.589	367	367	0.0084034	5.5449	2428100	1				228	435	TRUE	440	729	1392	1392
tr|Q9I5U9|Q9I5U9_PSEAE	tr|Q9I5U9|Q9I5U9_PSEAE	14	14	14	>tr|Q9I5U9|Q9I5U9_PSEAE Uncharacterized protein OS=Pseudomonas aeruginosa (strain ATCC 15692 / PAO1 / 1C / PRS 101 / LMG 12228) GN=PA0588 PE=4 SV=1	1	14	14	14	27.3	27.3	27.3	73.722	640	640	0	124.64	278570000	55				229	111;196;425;595;603;608;616;674;686;702;734;887;1025;1065	True;True;True;True;True;True;True;True;True;True;True;True;True;True	113;199;430;602;610;615;623;682;695;711;745;899;1038;1078	188;189;336;337;714;1038;1039;1040;1041;1053;1054;1060;1061;1075;1076;1173;1174;1196;1197;1224;1225;1306;1307;1572;1573;1815;1816;1881;1882;1883	384;385;386;696;697;698;699;700;1374;2025;2026;2027;2028;2029;2030;2044;2045;2046;2047;2056;2057;2058;2088;2089;2090;2091;2274;2275;2276;2277;2278;2279;2280;2281;2328;2329;2330;2374;2375;2376;2548;2549;3069;3070;3071;3072;3552;3553;3554;3667;3668;3669;3670;3671;3672	384;698;1374;2027;2047;2056;2088;2274;2330;2374;2548;3072;3554;3667
tr|Q9I5Y8|Q9I5Y8_PSEAE	tr|Q9I5Y8|Q9I5Y8_PSEAE	2	2	2	>tr|Q9I5Y8|Q9I5Y8_PSEAE Transketolase OS=Pseudomonas aeruginosa (strain ATCC 15692 / PAO1 / 1C / PRS 101 / LMG 12228) GN=tktA PE=1 SV=1	1	2	2	2	4.1	4.1	4.1	72.219	665	665	0	11.3	5144700	1				230	276;284	True;True	279;287	468;480	941;965	941;965
tr|Q9I612|Q9I612_PSEAE	tr|Q9I612|Q9I612_PSEAE	2	2	2	>tr|Q9I612|Q9I612_PSEAE Probable acyl-CoA dehydrogenase OS=Pseudomonas aeruginosa (strain ATCC 15692 / PAO1 / 1C / PRS 101 / LMG 12228) GN=PA0506 PE=3 SV=1	1	2	2	2	4	4	4	65.358	601	601	0	12.238	7948200	4				231	298;524	True;True	301;531	502;900;901	995;1783;1784;1785	995;1785
tr|Q9I659|Q9I659_PSEAE	tr|Q9I659|Q9I659_PSEAE	7	7	5	>tr|Q9I659|Q9I659_PSEAE Probable ClpA/B protease ATP binding subunit OS=Pseudomonas aeruginosa (strain ATCC 15692 / PAO1 / 1C / PRS 101 / LMG 12228) GN=PA0459 PE=4 SV=1	1	7	7	5	10.9	10.9	8.2	94.174	850	850	0	57.354	35857000	11				232	323;590;728;754;874;991;1098	True;True;True;True;True;True;True	327;597;739;765;886;1004;1111	546;1029;1030;1296;1297;1342;1343;1545;1546;1752;1956	1067;2004;2005;2535;2536;2604;2605;3014;3015;3433;3858	1067;2005;2535;2605;3014;3433;3858
tr|Q9I671|Q9I671_PSEAE	tr|Q9I671|Q9I671_PSEAE	2	2	2	>tr|Q9I671|Q9I671_PSEAE Glutaryl-CoA dehydrogenase OS=Pseudomonas aeruginosa (strain ATCC 15692 / PAO1 / 1C / PRS 101 / LMG 12228) GN=gcdH PE=3 SV=1	1	2	2	2	8.4	8.4	8.4	43.311	393	393	0	16.895	11447000	3				233	193;720	True;True	196;731	331;332;1261	690;691;2449	691;2449
tr|Q9I672|Q9I672_PSEAE	tr|Q9I672|Q9I672_PSEAE	1	1	1	>tr|Q9I672|Q9I672_PSEAE Uncharacterized protein OS=Pseudomonas aeruginosa (strain ATCC 15692 / PAO1 / 1C / PRS 101 / LMG 12228) GN=PA0446 PE=4 SV=1	1	1	1	1	6.1	6.1	6.1	43.846	407	407	0	9.3386	3754400	4				234	987	TRUE	1000	1745;1746	3423;3424;3425;3426	3426
tr|Q9I687|Q9I687_PSEAE	tr|Q9I687|Q9I687_PSEAE	2	2	2	>tr|Q9I687|Q9I687_PSEAE Methylenetetrahydrofolate reductase OS=Pseudomonas aeruginosa (strain ATCC 15692 / PAO1 / 1C / PRS 101 / LMG 12228) GN=metF PE=3 SV=1	1	2	2	2	10.3	10.3	10.3	32.228	290	290	0	13.648	16584000	3				235	583;820	True;True	590;831	1005;1006;1449	1962;1963;1964;2802	1962;2802
tr|Q9I689|Q9I689_PSEAE	tr|Q9I689|Q9I689_PSEAE	2	2	2	>tr|Q9I689|Q9I689_PSEAE ATP-dependent RNA helicase RhlE OS=Pseudomonas aeruginosa (strain ATCC 15692 / PAO1 / 1C / PRS 101 / LMG 12228) GN=rhlE PE=3 SV=1	1	2	2	2	6.3	6.3	6.3	70.111	639	639	0	17.794	1074700	6				236	145;166	True;True	147;168	245;275;276	474;475;518;519;520;521	475;519
tr|Q9I6H5|Q9I6H5_PSEAE	tr|Q9I6H5|Q9I6H5_PSEAE	5	5	5	>tr|Q9I6H5|Q9I6H5_PSEAE D-3-phosphoglycerate dehydrogenase OS=Pseudomonas aeruginosa (strain ATCC 15692 / PAO1 / 1C / PRS 101 / LMG 12228) GN=serA PE=3 SV=1	1	5	5	5	19.3	19.3	19.3	44.216	409	409	0	42.765	44464000	20				237	4;297;347;858;1117	True;True;True;True;True	4;300;351;870;1130	6;7;501;588;589;1514;1515;1516;1517;1985	13;14;993;994;1126;1127;1128;2934;2935;2936;2937;2938;2939;2940;2941;2942;2943;2944;2945;3902	13;993;1126;2936;3902
tr|Q9I6J2|Q9I6J2_PSEAE	tr|Q9I6J2|Q9I6J2_PSEAE	2	2	2	>tr|Q9I6J2|Q9I6J2_PSEAE Putrescine aminotransferase OS=Pseudomonas aeruginosa (strain ATCC 15692 / PAO1 / 1C / PRS 101 / LMG 12228) GN=spuC PE=3 SV=1	1	2	2	2	7.7	7.7	7.7	50.452	456	456	0	11.036	8601600	1				238	252;1079	True;True	255;1092	429;1906	876;3704	876;3704
tr|Q9I6Z1|Q9I6Z1_PSEAE	tr|Q9I6Z1|Q9I6Z1_PSEAE	2	2	2	>tr|Q9I6Z1|Q9I6Z1_PSEAE Uncharacterized protein OS=Pseudomonas aeruginosa (strain ATCC 15692 / PAO1 / 1C / PRS 101 / LMG 12228) GN=PA0141 PE=4 SV=1	1	2	2	2	9.1	9.1	9.1	34.463	298	298	0	11.184	14853000	4				239	496;1061	True;True	503;1074	847;1874;1875	1676;3656;3657;3658	1676;3656
tr|Q9I6Z3|Q9I6Z3_PSEAE	tr|Q9I6Z3|Q9I6Z3_PSEAE	5	5	5	>tr|Q9I6Z3|Q9I6Z3_PSEAE Alkyl hydroperoxide reductase subunit C OS=Pseudomonas aeruginosa (strain ATCC 15692 / PAO1 / 1C / PRS 101 / LMG 12228) GN=ahpC PE=4 SV=1	1	5	5	5	39.6	39.6	39.6	20.541	187	187	0	29.922	68830000	10				240	120;293;380;903;939	True;True;True;True;True	122;296;384;915;952	203;204;495;641;642;1610;1661;1662	411;412;413;414;415;980;1215;1216;3175;3267;3268	415;980;1216;3175;3267
tr|Q9I748|Q9I748_PSEAE	tr|Q9I748|Q9I748_PSEAE	3	3	3	>tr|Q9I748|Q9I748_PSEAE Uncharacterized protein OS=Pseudomonas aeruginosa (strain ATCC 15692 / PAO1 / 1C / PRS 101 / LMG 12228) GN=PA0084 PE=4 SV=1	1	3	3	3	6.2	6.2	6.2	55.771	498	498	0	21.133	22130000	4				241	432;832;1104	True;True;True	437;843;1117	724;725;1469;1965	1386;1387;2826;3871	1387;2826;3871
tr|Q9I762|Q9I762_PSEAE	tr|Q9I762|Q9I762_PSEAE	2	2	2	>tr|Q9I762|Q9I762_PSEAE Uncharacterized protein OS=Pseudomonas aeruginosa (strain ATCC 15692 / PAO1 / 1C / PRS 101 / LMG 12228) GN=PA0070 PE=4 SV=1	1	2	2	2	7.9	7.9	7.9	31.716	304	304	0	16.673	1906800	4				242	41;439	True;True	41;444	73;734;735	146;1401;1402;1403	146;1401

## Sheet: 5-1 Sheet1
Protein IDs-C4HSL (full)
REV__tr|Q9HXW2|Q9HXW2_PSEAE
REV__tr|Q9I0B7|Q9I0B7_PSEAE
sp|G3XD12|HCNC_PSEAE
sp|G3XD23|WBPB_PSEAE
sp|G3XD61|WBPI_PSEAE
sp|G3XD94|UGND_PSEAE
sp|O30508|ARUC_PSEAE
sp|O52759|RS4_PSEAE
sp|O52760|RPOA_PSEAE
sp|O52762|CATA_PSEAE
sp|O54439|ACP1_PSEAE
sp|O68822|AMPA_PSEAE
sp|O69754|PHZF_PSEAE
sp|O82850|RS2_PSEAE
sp|O86428|ILVE_PSEAE
sp|O87125|CHEB1_PSEAE
sp|P04739|FMPO_PSEAE
sp|P05384|DBHB_PSEAE
sp|P08280|RECA_PSEAE
sp|P08308|OTCC_PSEAE
sp|P09591|EFTU_PSEAE
sp|P11221|OPRI_PSEAE
sp|P11436|AMIE_PSEAE
sp|P13794|PORF_PSEAE
sp|P13981|ARCA_PSEAE
sp|P13982|ARCC_PSEAE
sp|P14165|CISY_PSEAE
sp|P23621|PHOR_PSEAE
sp|P29365|DHOM_PSEAE
sp|P30718|CH60_PSEAE
sp|P37798|ACCC_PSEAE
sp|P37799|BCCP_PSEAE
sp|P38100|CARB_PSEAE
sp|P43336|PHHC_PSEAE
sp|P47203|FTSA_PSEAE
sp|P47204|FTSZ_PSEAE
sp|P48247|GSA_PSEAE
sp|P50987|ARLY_PSEAE
sp|P53593|SUCC_PSEAE
sp|P55218|METZ_PSEAE
sp|P57112|STHA_PSEAE
sp|P72173|AAT_PSEAE
sp|P77915|HEMN_PSEAE
sp|Q51342|PUR1_PSEAE
sp|Q51422|SYDND_PSEAE
sp|Q51561|RPOB_PSEAE
sp|Q51567|SUCD_PSEAE
sp|Q59637|ODP1_PSEAE
sp|Q59638|ODP2_PSEAE
sp|Q59653|PYRB_PSEAE
sp|Q9HT16|ATPF_PSEAE
sp|Q9HT18|ATPA_PSEAE
sp|Q9HT19|ATPG_PSEAE
sp|Q9HT20|ATPB_PSEAE
sp|Q9HT95|ATSE4_PSEAE
sp|Q9HTD7|ASPA_PSEAE
sp|Q9HTF1|LTAE_PSEAE
sp|Q9HTN8|RL28_PSEAE
sp|Q9HTQ0|DADA1_PSEAE
sp|Q9HTV1|RHO_PSEAE
sp|Q9HU21|RMLC_PSEAE
sp|Q9HU65|GLNA_PSEAE
sp|Q9HUA6|OPGH_PSEAE
sp|Q9HUM0|HFQ_PSEAE
sp|Q9HUM6|PURA_PSEAE
sp|Q9HUM9|RS6_PSEAE
sp|Q9HUU5|URE1_PSEAE
sp|Q9HV43|DNAK_PSEAE
sp|Q9HV50|GLMM_PSEAE
sp|Q9HV59|PNP_PSEAE
sp|Q9HVA2|ILVC_PSEAE
sp|Q9HVC5|KPRS_PSEAE
sp|Q9HVF1|MQO2_PSEAE
sp|Q9HVI7|GLYA3_PSEAE
sp|Q9HVM4|SYI_PSEAE
sp|Q9HVN5|CLPB_PSEAE
sp|Q9HVW7|MURA_PSEAE
sp|Q9HVX6|SYW_PSEAE
sp|Q9HW02|MURC_PSEAE
sp|Q9HWC9|RPOC_PSEAE
sp|Q9HWD2|EFG1_PSEAE;sp|Q9I244|EFG2_PSEAE
sp|Q9HWD5|RL3_PSEAE
sp|Q9HWD8|RL2_PSEAE
sp|Q9HWE1|RS3_PSEAE
sp|Q9HWE2|RL16_PSEAE
sp|Q9HWE5|RL14_PSEAE
sp|Q9HWF2|RS5_PSEAE
sp|Q9HWF7|RS13_PSEAE
sp|Q9HWF8|RS11_PSEAE
sp|Q9HWG0|UVRA_PSEAE
sp|Q9HX33|SYL_PSEAE
sp|Q9HXH0|SYV_PSEAE
sp|Q9HXI1|SECD_PSEAE
sp|Q9HXJ4|ISPG_PSEAE
sp|Q9HXN2|PUR4_PSEAE
sp|Q9HXZ1|DPO3A_PSEAE
sp|Q9HXZ2|ACCA_PSEAE
sp|Q9HXZ4|PYRG_PSEAE
sp|Q9HXZ5|ENO_PSEAE
sp|Q9HYC7|SYM_PSEAE
sp|Q9HYD5|MAO1_PSEAE
sp|Q9HYL2|NOSZ_PSEAE
sp|Q9HYR2|FABH_PSEAE
sp|Q9HZ71|RS1_PSEAE
sp|Q9HZ76|WBPE_PSEAE
sp|Q9HZA7|ACCD_PSEAE
sp|Q9HZE0|DHE2_PSEAE
sp|Q9HZJ2|FADB_PSEAE
sp|Q9HZJ3|FADA_PSEAE
sp|Q9HZP5|ETFD_PSEAE
sp|Q9I099|SYT_PSEAE
sp|Q9I0A2|RL20_PSEAE
sp|Q9I0J1|NUOL_PSEAE
sp|Q9I0J5|NUOH_PSEAE
sp|Q9I0J6|NUOG_PSEAE
sp|Q9I0J7|NUOF_PSEAE
sp|Q9I0J9|NUOCD_PSEAE
sp|Q9I0K4|ACEA_PSEAE
sp|Q9I0Q0|PQSH_PSEAE
sp|Q9I1L9|DLDH1_PSEAE
sp|Q9I1S2|HCNB_PSEAE
sp|Q9I2A8|ATOB_PSEAE
sp|Q9I2U0|CLPX_PSEAE
sp|Q9I2U8|SYQ_PSEAE
sp|Q9I2V5|ACNB_PSEAE
sp|Q9I383|SELD_PSEAE
sp|Q9I3A8|GPDA_PSEAE
sp|Q9I3D1|DLDH2_PSEAE
sp|Q9I3D2|ODO2_PSEAE
sp|Q9I3F5|ACNA_PSEAE
sp|Q9I4Z4|PAL_PSEAE
sp|Q9I553|SYA_PSEAE
sp|Q9I558|ACSA1_PSEAE;sp|Q9HV66|ACSA2_PSEAE
sp|Q9I576|HPPD_PSEAE
sp|Q9I5A5|PTA_PSEAE
sp|Q9I5Z0|METK_PSEAE
sp|Q9I685|SAHH_PSEAE
sp|Q9I6E0|ILVD_PSEAE
sp|Q9I6M4|DAVT_PSEAE
sp|Q9I6M5|DAVD_PSEAE
sp|Q9I742|CLPV1_PSEAE
sp|Q9I7B8|SYGB_PSEAE
sp|Q9I7C2|GYRB_PSEAE
sp|Q9S646|PPK_PSEAE
tr|G3XCT6|G3XCT6_PSEAE
tr|G3XCV0|G3XCV0_PSEAE
tr|G3XDA2|G3XDA2_PSEAE
tr|Q9HTB5|Q9HTB5_PSEAE
tr|Q9HTD1|Q9HTD1_PSEAE
tr|Q9HTD8|Q9HTD8_PSEAE
tr|Q9HTD9|Q9HTD9_PSEAE
tr|Q9HU24|Q9HU24_PSEAE
tr|Q9HU38|Q9HU38_PSEAE
tr|Q9HUD3|Q9HUD3_PSEAE
tr|Q9HUE2|Q9HUE2_PSEAE
tr|Q9HUG0|Q9HUG0_PSEAE
tr|Q9HV96|Q9HV96_PSEAE
tr|Q9HVA0|Q9HVA0_PSEAE
tr|Q9HVJ1|Q9HVJ1_PSEAE
tr|Q9HVS8|Q9HVS8_PSEAE
tr|Q9HVU0|Q9HVU0_PSEAE
tr|Q9HVY5|Q9HVY5_PSEAE
tr|Q9HVY6|Q9HVY6_PSEAE
tr|Q9HW15|Q9HW15_PSEAE
tr|Q9HW49|Q9HW49_PSEAE
tr|Q9HW72|Q9HW72_PSEAE
tr|Q9HWG9|Q9HWG9_PSEAE
tr|Q9HWH2|Q9HWH2_PSEAE
tr|Q9HWQ0|Q9HWQ0_PSEAE
tr|Q9HWV0|Q9HWV0_PSEAE
tr|Q9I2C4|Q9I2C4_PSEAE;tr|Q9HX05|Q9HX05_PSEAE
tr|Q9HX44|Q9HX44_PSEAE
tr|Q9HY01|Q9HY01_PSEAE
tr|Q9HY12|Q9HY12_PSEAE
tr|Q9HY13|Q9HY13_PSEAE
tr|Q9HY79|Q9HY79_PSEAE
tr|Q9HY81|Q9HY81_PSEAE
tr|Q9HYC8|Q9HYC8_PSEAE
tr|Q9HYR6|Q9HYR6_PSEAE
tr|Q9HYR7|Q9HYR7_PSEAE
tr|Q9HYR8|Q9HYR8_PSEAE
tr|Q9HYT5|Q9HYT5_PSEAE
tr|Q9HYT9|Q9HYT9_PSEAE
tr|Q9HYZ6|Q9HYZ6_PSEAE
tr|Q9HZ78|Q9HZ78_PSEAE
tr|Q9HZC5|Q9HZC5_PSEAE
tr|Q9HZK4|Q9HZK4_PSEAE
tr|Q9HZV6|Q9HZV6_PSEAE
tr|Q9I015|Q9I015_PSEAE
tr|Q9I028|Q9I028_PSEAE
tr|Q9I056|Q9I056_PSEAE
tr|Q9I0D3|Q9I0D3_PSEAE
tr|Q9I0L4|Q9I0L4_PSEAE
tr|Q9I0L5|Q9I0L5_PSEAE
tr|Q9I0T1|Q9I0T1_PSEAE
tr|Q9I0T2|Q9I0T2_PSEAE
tr|Q9I1F3|Q9I1F3_PSEAE
tr|Q9I1H3|Q9I1H3_PSEAE
tr|Q9I1N7|Q9I1N7_PSEAE
tr|Q9I1Z6|Q9I1Z6_PSEAE
tr|Q9I220|Q9I220_PSEAE
tr|Q9I246|Q9I246_PSEAE
tr|Q9I297|Q9I297_PSEAE
tr|Q9I299|Q9I299_PSEAE
tr|Q9I2A9|Q9I2A9_PSEAE
tr|Q9I2W9|Q9I2W9_PSEAE
tr|Q9I2Z1|Q9I2Z1_PSEAE
tr|Q9I3B2|Q9I3B2_PSEAE
tr|Q9I3D3|Q9I3D3_PSEAE
tr|Q9I3D4|Q9I3D4_PSEAE
tr|Q9I3D5|Q9I3D5_PSEAE
tr|Q9I3G0|Q9I3G0_PSEAE
tr|Q9I3G1|Q9I3G1_PSEAE;tr|Q9I3G4|Q9I3G4_PSEAE
tr|Q9I3G2|Q9I3G2_PSEAE
tr|Q9I3G3|Q9I3G3_PSEAE
tr|Q9I3G6|Q9I3G6_PSEAE
tr|Q9I3H0|Q9I3H0_PSEAE
tr|Q9I3X2|Q9I3X2_PSEAE
tr|Q9I4I1|Q9I4I1_PSEAE
tr|Q9I4M1|Q9I4M1_PSEAE
tr|Q9I4X1|Q9I4X1_PSEAE
tr|Q9I570|Q9I570_PSEAE
tr|Q9I5F6|Q9I5F6_PSEAE
tr|Q9I5I5|Q9I5I5_PSEAE
tr|Q9I5U9|Q9I5U9_PSEAE
tr|Q9I612|Q9I612_PSEAE
tr|Q9I659|Q9I659_PSEAE
tr|Q9I671|Q9I671_PSEAE
tr|Q9I672|Q9I672_PSEAE
tr|Q9I687|Q9I687_PSEAE
tr|Q9I688|Q9I688_PSEAE
tr|Q9I689|Q9I689_PSEAE
tr|Q9I6A0|Q9I6A0_PSEAE
tr|Q9I6H5|Q9I6H5_PSEAE
tr|Q9I6J2|Q9I6J2_PSEAE
tr|Q9I6Z1|Q9I6Z1_PSEAE
tr|Q9I6Z3|Q9I6Z3_PSEAE
tr|Q9I738|Q9I738_PSEAE
tr|Q9I748|Q9I748_PSEAE
Probe 12 (subtracted)
REV__sp|Q9I0K9|PUR8_PSEAE
sp|O52761|RL17_PSEAE
sp|Q9S508|PHZB2_PSEAE;sp|O69753|PHZB1_PSEAE
sp|P15276|ALGP_PSEAE
sp|P53641|SODF_PSEAE
sp|Q9HT14|ATP6_PSEAE
sp|Q9HT21|ATPE_PSEAE
sp|Q9HTQ2|ALR2_PSEAE
sp|Q9HTZ7|PCKA_PSEAE
sp|Q9HVI7|GLYA3_PSEAE;sp|Q9I138|GLYA2_PSEAE
sp|Q9HVT8|GATA_PSEAE
sp|Q9HVY3|RS9_PSEAE
sp|Q9HWC8|RL7_PSEAE
sp|Q9HWE8|RS14_PSEAE
sp|Q9HWZ6|IPYR_PSEAE
sp|Q9HY84|ASSY_PSEAE
sp|Q9HYQ8|HLDD_PSEAE
sp|Q9HZP6|ETFB_PSEAE
sp|Q9I3I0|Y1533_PSEAE
sp|Q9I558|ACSA1_PSEAE
sp|Q9I5Y4|PGK_PSEAE
sp|Q9I636|MASZ_PSEAE
sp|Q9XCL6|SYE_PSEAE
sp|Q9ZFK4|KDSA_PSEAE
tr|Q9HU11|Q9HU11_PSEAE
tr|Q9HVF9|Q9HVF9_PSEAE
tr|Q9HWP8|Q9HWP8_PSEAE
tr|Q9HYR4|Q9HYR4_PSEAE
tr|Q9HZA6|Q9HZA6_PSEAE
tr|Q9HZI0|Q9HZI0_PSEAE
tr|Q9I120|Q9I120_PSEAE
tr|Q9I1I5|Q9I1I5_PSEAE
tr|Q9I296|Q9I296_PSEAE
tr|Q9I2V3|Q9I2V3_PSEAE
tr|Q9I2Z5|Q9I2Z5_PSEAE
tr|Q9I4X2|Q9I4X2_PSEAE
tr|Q9I5Y8|Q9I5Y8_PSEAE
tr|Q9I762|Q9I762_PSEAE

## Sheet: 5-1 Sheet2
Protein IDs-Probe 12 (subtracted)	Protein IDs-Probe 12 (full)			Fasta headers	Number of proteins	Peptides	Razor + unique peptides
REV__sp|Q9I0K9|PUR8_PSEAE	REV__sp|Q9I0K9|PUR8_PSEAE			>sp|Q9I0K9|PUR8_PSEAE Adenylosuccinate lyase OS=Pseudomonas aeruginosa (strain ATCC 15692 / PAO1 / 1C / PRS 101 / LMG 12228) GN=purB PE=3 SV=1	1	1	1
sp|O52761|RL17_PSEAE	REV__tr|Q9HXW2|Q9HXW2_PSEAE			>tr|Q9HXW2|Q9HXW2_PSEAE Probable transcriptional regulator OS=Pseudomonas aeruginosa (strain ATCC 15692 / PAO1 / 1C / PRS 101 / LMG 12228) GN=PA3678 PE=4 SV=1	1	1	1
sp|Q9S508|PHZB2_PSEAE;sp|O69753|PHZB1_PSEAE	sp|G3XD12|HCNC_PSEAE			>sp|G3XD12|HCNC_PSEAE Hydrogen cyanide synthase subunit HcnC OS=Pseudomonas aeruginosa (strain ATCC 15692 / PAO1 / 1C / PRS 101 / LMG 12228) GN=hcnC PE=1 SV=1	1	2	2
sp|P15276|ALGP_PSEAE	sp|G3XD23|WBPB_PSEAE			>sp|G3XD23|WBPB_PSEAE UDP-N-acetyl-2-amino-2-deoxy-D-glucuronate oxidase OS=Pseudomonas aeruginosa (strain ATCC 15692 / PAO1 / 1C / PRS 101 / LMG 12228) GN=wbpB PE=1 SV=1	1	5	5
sp|P53641|SODF_PSEAE	sp|G3XD61|WBPI_PSEAE			>sp|G3XD61|WBPI_PSEAE UDP-2,3-diacetamido-2,3-dideoxy-D-glucuronate 2-epimerase OS=Pseudomonas aeruginosa (strain ATCC 15692 / PAO1 / 1C / PRS 101 / LMG 12228) GN=wbpI PE=1 SV=1	1	7	7
sp|Q9HT14|ATP6_PSEAE	sp|G3XD94|UGND_PSEAE			>sp|G3XD94|UGND_PSEAE UDP-N-acetyl-D-glucosamine 6-dehydrogenase OS=Pseudomonas aeruginosa (strain ATCC 15692 / PAO1 / 1C / PRS 101 / LMG 12228) GN=wbpA PE=1 SV=1	1	6	6
sp|Q9HT21|ATPE_PSEAE	sp|O30508|ARUC_PSEAE			>sp|O30508|ARUC_PSEAE Succinylornithine transaminase/acetylornithine aminotransferase OS=Pseudomonas aeruginosa (strain ATCC 15692 / PAO1 / 1C / PRS 101 / LMG 12228) GN=aruC PE=1 SV=2	1	2	2
sp|Q9HTQ2|ALR2_PSEAE	sp|O52759|RS4_PSEAE			>sp|O52759|RS4_PSEAE 30S ribosomal protein S4 OS=Pseudomonas aeruginosa (strain ATCC 15692 / PAO1 / 1C / PRS 101 / LMG 12228) GN=rpsD PE=3 SV=2	1	6	6
sp|Q9HTZ7|PCKA_PSEAE	sp|O52760|RPOA_PSEAE			>sp|O52760|RPOA_PSEAE DNA-directed RNA polymerase subunit alpha OS=Pseudomonas aeruginosa (strain ATCC 15692 / PAO1 / 1C / PRS 101 / LMG 12228) GN=rpoA PE=3 SV=2	1	6	6
sp|Q9HVI7|GLYA3_PSEAE;sp|Q9I138|GLYA2_PSEAE	sp|O52761|RL17_PSEAE			>sp|O52761|RL17_PSEAE 50S ribosomal protein L17 OS=Pseudomonas aeruginosa (strain ATCC 15692 / PAO1 / 1C / PRS 101 / LMG 12228) GN=rplQ PE=3 SV=1	1	1	1
sp|Q9HVT8|GATA_PSEAE	sp|O52762|CATA_PSEAE			>sp|O52762|CATA_PSEAE Catalase OS=Pseudomonas aeruginosa (strain ATCC 15692 / PAO1 / 1C / PRS 101 / LMG 12228) GN=katA PE=1 SV=1	1	4	4
sp|Q9HVY3|RS9_PSEAE	sp|O54439|ACP1_PSEAE			>sp|O54439|ACP1_PSEAE Acyl carrier protein 1 OS=Pseudomonas aeruginosa (strain ATCC 15692 / PAO1 / 1C / PRS 101 / LMG 12228) GN=acpP1 PE=3 SV=4	1	2	2
sp|Q9HWC8|RL7_PSEAE	sp|O68822|AMPA_PSEAE			>sp|O68822|AMPA_PSEAE Cytosol aminopeptidase OS=Pseudomonas aeruginosa (strain ATCC 15692 / PAO1 / 1C / PRS 101 / LMG 12228) GN=pepA PE=3 SV=1	1	13	13
sp|Q9HWE8|RS14_PSEAE	sp|Q9S508|PHZB2_PSEAE;sp|O69753|PHZB1_PSEAE			>sp|Q9S508|PHZB2_PSEAE Phenazine biosynthesis protein PhzB 2 OS=Pseudomonas aeruginosa (strain ATCC 15692 / PAO1 / 1C / PRS 101 / LMG 12228) GN=phzB2 PE=1 SV=1;>sp|O69753|PHZB1_PSEAE Phenazine biosynthesis protein PhzB 1 OS=Pseudomonas aeruginosa (strain A	2	1	1
sp|Q9HWZ6|IPYR_PSEAE	sp|O69754|PHZF_PSEAE			>sp|O69754|PHZF_PSEAE Trans-2,3-dihydro-3-hydroxyanthranilate isomerase OS=Pseudomonas aeruginosa (strain ATCC 15692 / PAO1 / 1C / PRS 101 / LMG 12228) GN=phzF1 PE=3 SV=2	1	2	2
sp|Q9HY84|ASSY_PSEAE	sp|O82850|RS2_PSEAE			>sp|O82850|RS2_PSEAE 30S ribosomal protein S2 OS=Pseudomonas aeruginosa (strain ATCC 15692 / PAO1 / 1C / PRS 101 / LMG 12228) GN=rpsB PE=3 SV=2	1	2	2
sp|Q9HYQ8|HLDD_PSEAE	sp|O86428|ILVE_PSEAE			>sp|O86428|ILVE_PSEAE Branched-chain-amino-acid aminotransferase OS=Pseudomonas aeruginosa (strain ATCC 15692 / PAO1 / 1C / PRS 101 / LMG 12228) GN=ilvE PE=1 SV=2	1	2	2
sp|Q9HZP6|ETFB_PSEAE	sp|O87125|CHEB1_PSEAE			>sp|O87125|CHEB1_PSEAE Chemotaxis response regulator protein-glutamate methylesterase of group 1 operon OS=Pseudomonas aeruginosa (strain ATCC 15692 / PAO1 / 1C / PRS 101 / LMG 12228) GN=cheB1 PE=1 SV=2	1	1	1
sp|Q9I3I0|Y1533_PSEAE	sp|P04739|FMPO_PSEAE			>sp|P04739|FMPO_PSEAE Fimbrial protein OS=Pseudomonas aeruginosa (strain ATCC 15692 / PAO1 / 1C / PRS 101 / LMG 12228) GN=pilA PE=1 SV=1	1	2	2
sp|Q9I558|ACSA1_PSEAE	sp|P05384|DBHB_PSEAE			>sp|P05384|DBHB_PSEAE DNA-binding protein HU-beta OS=Pseudomonas aeruginosa (strain ATCC 15692 / PAO1 / 1C / PRS 101 / LMG 12228) GN=hupB PE=1 SV=3	1	1	1
sp|Q9I5Y4|PGK_PSEAE	sp|P08280|RECA_PSEAE			>sp|P08280|RECA_PSEAE Protein RecA OS=Pseudomonas aeruginosa (strain ATCC 15692 / PAO1 / 1C / PRS 101 / LMG 12228) GN=recA PE=3 SV=1	1	1	1
sp|Q9I636|MASZ_PSEAE	sp|P08308|OTCC_PSEAE			>sp|P08308|OTCC_PSEAE Ornithine carbamoyltransferase, catabolic OS=Pseudomonas aeruginosa (strain ATCC 15692 / PAO1 / 1C / PRS 101 / LMG 12228) GN=arcB PE=1 SV=3	1	9	9
sp|Q9XCL6|SYE_PSEAE	sp|P09591|EFTU_PSEAE			>sp|P09591|EFTU_PSEAE Elongation factor Tu OS=Pseudomonas aeruginosa (strain ATCC 15692 / PAO1 / 1C / PRS 101 / LMG 12228) GN=tufA PE=1 SV=2	1	21	21
sp|Q9ZFK4|KDSA_PSEAE	sp|P11221|OPRI_PSEAE			>sp|P11221|OPRI_PSEAE Major outer membrane lipoprotein OS=Pseudomonas aeruginosa (strain ATCC 15692 / PAO1 / 1C / PRS 101 / LMG 12228) GN=oprI PE=3 SV=1	1	2	2
tr|Q9HU11|Q9HU11_PSEAE	sp|P11436|AMIE_PSEAE			>sp|P11436|AMIE_PSEAE Aliphatic amidase OS=Pseudomonas aeruginosa (strain ATCC 15692 / PAO1 / 1C / PRS 101 / LMG 12228) GN=amiE PE=1 SV=2	1	2	2
tr|Q9HVF9|Q9HVF9_PSEAE	sp|P13794|PORF_PSEAE			>sp|P13794|PORF_PSEAE Outer membrane porin F OS=Pseudomonas aeruginosa (strain ATCC 15692 / PAO1 / 1C / PRS 101 / LMG 12228) GN=oprF PE=1 SV=1	1	5	5
tr|Q9HWP8|Q9HWP8_PSEAE	sp|P13981|ARCA_PSEAE			>sp|P13981|ARCA_PSEAE Arginine deiminase OS=Pseudomonas aeruginosa (strain ATCC 15692 / PAO1 / 1C / PRS 101 / LMG 12228) GN=arcA PE=1 SV=2	1	22	22
tr|Q9HYR4|Q9HYR4_PSEAE	sp|P13982|ARCC_PSEAE			>sp|P13982|ARCC_PSEAE Carbamate kinase OS=Pseudomonas aeruginosa (strain ATCC 15692 / PAO1 / 1C / PRS 101 / LMG 12228) GN=arcC PE=3 SV=1	1	4	4
tr|Q9HZA6|Q9HZA6_PSEAE	sp|P14165|CISY_PSEAE			>sp|P14165|CISY_PSEAE Citrate synthase OS=Pseudomonas aeruginosa (strain ATCC 15692 / PAO1 / 1C / PRS 101 / LMG 12228) GN=gltA PE=3 SV=2	1	7	7
tr|Q9HZI0|Q9HZI0_PSEAE	sp|P15276|ALGP_PSEAE			>sp|P15276|ALGP_PSEAE Transcriptional regulatory protein AlgP OS=Pseudomonas aeruginosa (strain ATCC 15692 / PAO1 / 1C / PRS 101 / LMG 12228) GN=algP PE=4 SV=2	1	1	1
tr|Q9I120|Q9I120_PSEAE	sp|P29365|DHOM_PSEAE			>sp|P29365|DHOM_PSEAE Homoserine dehydrogenase OS=Pseudomonas aeruginosa (strain ATCC 15692 / PAO1 / 1C / PRS 101 / LMG 12228) GN=hom PE=3 SV=2	1	2	2
tr|Q9I1I5|Q9I1I5_PSEAE	sp|P30718|CH60_PSEAE			>sp|P30718|CH60_PSEAE 60 kDa chaperonin OS=Pseudomonas aeruginosa (strain ATCC 15692 / PAO1 / 1C / PRS 101 / LMG 12228) GN=groL PE=1 SV=3	1	21	21
tr|Q9I296|Q9I296_PSEAE	sp|P37798|ACCC_PSEAE			>sp|P37798|ACCC_PSEAE Biotin carboxylase OS=Pseudomonas aeruginosa (strain ATCC 15692 / PAO1 / 1C / PRS 101 / LMG 12228) GN=accC PE=1 SV=1	1	10	10
tr|Q9I2V3|Q9I2V3_PSEAE	sp|P37799|BCCP_PSEAE			>sp|P37799|BCCP_PSEAE Biotin carboxyl carrier protein of acetyl-CoA carboxylase OS=Pseudomonas aeruginosa (strain ATCC 15692 / PAO1 / 1C / PRS 101 / LMG 12228) GN=accB PE=3 SV=1	1	8	8
tr|Q9I2Z5|Q9I2Z5_PSEAE	sp|P38100|CARB_PSEAE			>sp|P38100|CARB_PSEAE Carbamoyl-phosphate synthase large chain OS=Pseudomonas aeruginosa (strain ATCC 15692 / PAO1 / 1C / PRS 101 / LMG 12228) GN=carB PE=3 SV=3	1	8	8
tr|Q9I4X2|Q9I4X2_PSEAE	sp|P43336|PHHC_PSEAE			>sp|P43336|PHHC_PSEAE Aromatic-amino-acid aminotransferase OS=Pseudomonas aeruginosa (strain ATCC 15692 / PAO1 / 1C / PRS 101 / LMG 12228) GN=phhC PE=3 SV=2	1	4	4
tr|Q9I5Y8|Q9I5Y8_PSEAE	sp|P47203|FTSA_PSEAE			>sp|P47203|FTSA_PSEAE Cell division protein FtsA OS=Pseudomonas aeruginosa (strain ATCC 15692 / PAO1 / 1C / PRS 101 / LMG 12228) GN=ftsA PE=3 SV=2	1	3	3
tr|Q9I762|Q9I762_PSEAE	sp|P47204|FTSZ_PSEAE			>sp|P47204|FTSZ_PSEAE Cell division protein FtsZ OS=Pseudomonas aeruginosa (strain ATCC 15692 / PAO1 / 1C / PRS 101 / LMG 12228) GN=ftsZ PE=1 SV=2	1	3	3
	sp|P48247|GSA_PSEAE			>sp|P48247|GSA_PSEAE Glutamate-1-semialdehyde 2,1-aminomutase OS=Pseudomonas aeruginosa (strain ATCC 15692 / PAO1 / 1C / PRS 101 / LMG 12228) GN=hemL PE=1 SV=2	1	4	4
	sp|P50987|ARLY_PSEAE			>sp|P50987|ARLY_PSEAE Argininosuccinate lyase OS=Pseudomonas aeruginosa (strain ATCC 15692 / PAO1 / 1C / PRS 101 / LMG 12228) GN=argH PE=3 SV=2	1	1	1
	sp|P53593|SUCC_PSEAE			>sp|P53593|SUCC_PSEAE Succinyl-CoA ligase [ADP-forming] subunit beta OS=Pseudomonas aeruginosa (strain ATCC 15692 / PAO1 / 1C / PRS 101 / LMG 12228) GN=sucC PE=3 SV=2	1	15	15
	sp|P53641|SODF_PSEAE			>sp|P53641|SODF_PSEAE Superoxide dismutase [Fe] OS=Pseudomonas aeruginosa (strain ATCC 15692 / PAO1 / 1C / PRS 101 / LMG 12228) GN=sodB PE=3 SV=3	1	2	2
	sp|P57112|STHA_PSEAE			>sp|P57112|STHA_PSEAE Soluble pyridine nucleotide transhydrogenase OS=Pseudomonas aeruginosa (strain ATCC 15692 / PAO1 / 1C / PRS 101 / LMG 12228) GN=sthA PE=1 SV=2	1	4	4
	sp|P72173|AAT_PSEAE			>sp|P72173|AAT_PSEAE Aspartate aminotransferase OS=Pseudomonas aeruginosa (strain ATCC 15692 / PAO1 / 1C / PRS 101 / LMG 12228) GN=aspC PE=3 SV=2	1	9	9
	sp|P77915|HEMN_PSEAE			>sp|P77915|HEMN_PSEAE Oxygen-independent coproporphyrinogen-III oxidase OS=Pseudomonas aeruginosa (strain ATCC 15692 / PAO1 / 1C / PRS 101 / LMG 12228) GN=hemN PE=2 SV=2	1	4	4
	sp|Q51342|PUR1_PSEAE			>sp|Q51342|PUR1_PSEAE Amidophosphoribosyltransferase OS=Pseudomonas aeruginosa (strain ATCC 15692 / PAO1 / 1C / PRS 101 / LMG 12228) GN=purF PE=3 SV=3	1	3	3
	sp|Q51422|SYDND_PSEAE			>sp|Q51422|SYDND_PSEAE Aspartate--tRNA(Asp/Asn) ligase OS=Pseudomonas aeruginosa (strain ATCC 15692 / PAO1 / 1C / PRS 101 / LMG 12228) GN=aspS PE=1 SV=2	1	5	5
	sp|Q51561|RPOB_PSEAE			>sp|Q51561|RPOB_PSEAE DNA-directed RNA polymerase subunit beta OS=Pseudomonas aeruginosa (strain ATCC 15692 / PAO1 / 1C / PRS 101 / LMG 12228) GN=rpoB PE=3 SV=2	1	33	33
	sp|Q51567|SUCD_PSEAE			>sp|Q51567|SUCD_PSEAE Succinyl-CoA ligase [ADP-forming] subunit alpha OS=Pseudomonas aeruginosa (strain ATCC 15692 / PAO1 / 1C / PRS 101 / LMG 12228) GN=sucD PE=3 SV=2	1	3	3
	sp|Q59637|ODP1_PSEAE			>sp|Q59637|ODP1_PSEAE Pyruvate dehydrogenase E1 component OS=Pseudomonas aeruginosa (strain ATCC 15692 / PAO1 / 1C / PRS 101 / LMG 12228) GN=aceE PE=3 SV=2	1	20	20
	sp|Q59638|ODP2_PSEAE			>sp|Q59638|ODP2_PSEAE Dihydrolipoyllysine-residue acetyltransferase component of pyruvate dehydrogenase complex OS=Pseudomonas aeruginosa (strain ATCC 15692 / PAO1 / 1C / PRS 101 / LMG 12228) GN=aceF PE=2 SV=2	1	10	10
	sp|Q9HT14|ATP6_PSEAE			>sp|Q9HT14|ATP6_PSEAE ATP synthase subunit a OS=Pseudomonas aeruginosa (strain ATCC 15692 / PAO1 / 1C / PRS 101 / LMG 12228) GN=atpB PE=3 SV=1	1	1	1
	sp|Q9HT16|ATPF_PSEAE			>sp|Q9HT16|ATPF_PSEAE ATP synthase subunit b OS=Pseudomonas aeruginosa (strain ATCC 15692 / PAO1 / 1C / PRS 101 / LMG 12228) GN=atpF PE=3 SV=1	1	3	3
	sp|Q9HT18|ATPA_PSEAE			>sp|Q9HT18|ATPA_PSEAE ATP synthase subunit alpha OS=Pseudomonas aeruginosa (strain ATCC 15692 / PAO1 / 1C / PRS 101 / LMG 12228) GN=atpA PE=3 SV=1	1	12	12
	sp|Q9HT19|ATPG_PSEAE			>sp|Q9HT19|ATPG_PSEAE ATP synthase gamma chain OS=Pseudomonas aeruginosa (strain ATCC 15692 / PAO1 / 1C / PRS 101 / LMG 12228) GN=atpG PE=3 SV=1	1	1	1
	sp|Q9HT20|ATPB_PSEAE			>sp|Q9HT20|ATPB_PSEAE ATP synthase subunit beta OS=Pseudomonas aeruginosa (strain ATCC 15692 / PAO1 / 1C / PRS 101 / LMG 12228) GN=atpD PE=3 SV=1	1	10	10
	sp|Q9HT21|ATPE_PSEAE			>sp|Q9HT21|ATPE_PSEAE ATP synthase epsilon chain OS=Pseudomonas aeruginosa (strain ATCC 15692 / PAO1 / 1C / PRS 101 / LMG 12228) GN=atpC PE=3 SV=1	1	1	1
	sp|Q9HT95|ATSE4_PSEAE			>sp|Q9HT95|ATSE4_PSEAE Acetyltransferase PA5475 OS=Pseudomonas aeruginosa (strain ATCC 15692 / PAO1 / 1C / PRS 101 / LMG 12228) GN=PA5475 PE=3 SV=1	1	2	2
	sp|Q9HTD7|ASPA_PSEAE			>sp|Q9HTD7|ASPA_PSEAE Aspartate ammonia-lyase OS=Pseudomonas aeruginosa (strain ATCC 15692 / PAO1 / 1C / PRS 101 / LMG 12228) GN=aspA PE=3 SV=1	1	2	2
	sp|Q9HTF1|LTAE_PSEAE			>sp|Q9HTF1|LTAE_PSEAE Low specificity L-threonine aldolase OS=Pseudomonas aeruginosa (strain ATCC 15692 / PAO1 / 1C / PRS 101 / LMG 12228) GN=ltaE PE=3 SV=1	1	2	2
	sp|Q9HTN8|RL28_PSEAE			>sp|Q9HTN8|RL28_PSEAE 50S ribosomal protein L28 OS=Pseudomonas aeruginosa (strain ATCC 15692 / PAO1 / 1C / PRS 101 / LMG 12228) GN=rpmB PE=3 SV=1	1	1	1
	sp|Q9HTQ0|DADA1_PSEAE			>sp|Q9HTQ0|DADA1_PSEAE D-amino acid dehydrogenase 1 OS=Pseudomonas aeruginosa (strain ATCC 15692 / PAO1 / 1C / PRS 101 / LMG 12228) GN=dadA1 PE=1 SV=1	1	7	7
	sp|Q9HTQ2|ALR2_PSEAE			>sp|Q9HTQ2|ALR2_PSEAE Alanine racemase, catabolic OS=Pseudomonas aeruginosa (strain ATCC 15692 / PAO1 / 1C / PRS 101 / LMG 12228) GN=dadX PE=1 SV=1	1	1	1
	sp|Q9HTV1|RHO_PSEAE			>sp|Q9HTV1|RHO_PSEAE Transcription termination factor Rho OS=Pseudomonas aeruginosa (strain ATCC 15692 / PAO1 / 1C / PRS 101 / LMG 12228) GN=rho PE=3 SV=1	1	2	2
	sp|Q9HTZ7|PCKA_PSEAE			>sp|Q9HTZ7|PCKA_PSEAE Phosphoenolpyruvate carboxykinase [ATP] OS=Pseudomonas aeruginosa (strain ATCC 15692 / PAO1 / 1C / PRS 101 / LMG 12228) GN=pckA PE=3 SV=1	1	2	2
	sp|Q9HU21|RMLC_PSEAE			>sp|Q9HU21|RMLC_PSEAE dTDP-4-dehydrorhamnose 3,5-epimerase OS=Pseudomonas aeruginosa (strain ATCC 15692 / PAO1 / 1C / PRS 101 / LMG 12228) GN=rmlC PE=1 SV=1	1	1	1
	sp|Q9HU65|GLNA_PSEAE			>sp|Q9HU65|GLNA_PSEAE Glutamine synthetase OS=Pseudomonas aeruginosa (strain ATCC 15692 / PAO1 / 1C / PRS 101 / LMG 12228) GN=glnA PE=1 SV=1	1	9	9
	sp|Q9HUM0|HFQ_PSEAE			>sp|Q9HUM0|HFQ_PSEAE RNA-binding protein Hfq OS=Pseudomonas aeruginosa (strain ATCC 15692 / PAO1 / 1C / PRS 101 / LMG 12228) GN=hfq PE=1 SV=1	1	1	1
	sp|Q9HUM6|PURA_PSEAE			>sp|Q9HUM6|PURA_PSEAE Adenylosuccinate synthetase OS=Pseudomonas aeruginosa (strain ATCC 15692 / PAO1 / 1C / PRS 101 / LMG 12228) GN=purA PE=3 SV=1	1	2	2
	sp|Q9HV43|DNAK_PSEAE			>sp|Q9HV43|DNAK_PSEAE Chaperone protein DnaK OS=Pseudomonas aeruginosa (strain ATCC 15692 / PAO1 / 1C / PRS 101 / LMG 12228) GN=dnaK PE=3 SV=1	1	4	4
	sp|Q9HV50|GLMM_PSEAE			>sp|Q9HV50|GLMM_PSEAE Phosphoglucosamine mutase OS=Pseudomonas aeruginosa (strain ATCC 15692 / PAO1 / 1C / PRS 101 / LMG 12228) GN=glmM PE=3 SV=1	1	1	1
	sp|Q9HV59|PNP_PSEAE			>sp|Q9HV59|PNP_PSEAE Polyribonucleotide nucleotidyltransferase OS=Pseudomonas aeruginosa (strain ATCC 15692 / PAO1 / 1C / PRS 101 / LMG 12228) GN=pnp PE=3 SV=1	1	7	7
	sp|Q9HVA2|ILVC_PSEAE			>sp|Q9HVA2|ILVC_PSEAE Ketol-acid reductoisomerase OS=Pseudomonas aeruginosa (strain ATCC 15692 / PAO1 / 1C / PRS 101 / LMG 12228) GN=ilvC PE=1 SV=1	1	3	3
	sp|Q9HVC5|KPRS_PSEAE			>sp|Q9HVC5|KPRS_PSEAE Ribose-phosphate pyrophosphokinase OS=Pseudomonas aeruginosa (strain ATCC 15692 / PAO1 / 1C / PRS 101 / LMG 12228) GN=prs PE=3 SV=1	1	3	3
	sp|Q9HVF1|MQO2_PSEAE			>sp|Q9HVF1|MQO2_PSEAE Probable malate:quinone oxidoreductase 2 OS=Pseudomonas aeruginosa (strain ATCC 15692 / PAO1 / 1C / PRS 101 / LMG 12228) GN=mqo2 PE=3 SV=1	1	2	2
	sp|Q9HVI7|GLYA3_PSEAE;sp|Q9I138|GLYA2_PSEAE			>sp|Q9HVI7|GLYA3_PSEAE Serine hydroxymethyltransferase 3 OS=Pseudomonas aeruginosa (strain ATCC 15692 / PAO1 / 1C / PRS 101 / LMG 12228) GN=glyA2 PE=3 SV=1;>sp|Q9I138|GLYA2_PSEAE Serine hydroxymethyltransferase 2 OS=Pseudomonas aeruginosa (strain ATCC 1569	2	2	2
	sp|Q9HVM4|SYI_PSEAE			>sp|Q9HVM4|SYI_PSEAE Isoleucine--tRNA ligase OS=Pseudomonas aeruginosa (strain ATCC 15692 / PAO1 / 1C / PRS 101 / LMG 12228) GN=ileS PE=3 SV=1	1	10	10
	sp|Q9HVN5|CLPB_PSEAE			>sp|Q9HVN5|CLPB_PSEAE Chaperone protein ClpB OS=Pseudomonas aeruginosa (strain ATCC 15692 / PAO1 / 1C / PRS 101 / LMG 12228) GN=clpB PE=3 SV=1	1	3	1
	sp|Q9HVT8|GATA_PSEAE			>sp|Q9HVT8|GATA_PSEAE Glutamyl-tRNA(Gln) amidotransferase subunit A OS=Pseudomonas aeruginosa (strain ATCC 15692 / PAO1 / 1C / PRS 101 / LMG 12228) GN=gatA PE=1 SV=1	1	2	2
	sp|Q9HVY3|RS9_PSEAE			>sp|Q9HVY3|RS9_PSEAE 30S ribosomal protein S9 OS=Pseudomonas aeruginosa (strain ATCC 15692 / PAO1 / 1C / PRS 101 / LMG 12228) GN=rpsI PE=3 SV=1	1	1	1
	sp|Q9HW02|MURC_PSEAE			>sp|Q9HW02|MURC_PSEAE UDP-N-acetylmuramate--L-alanine ligase OS=Pseudomonas aeruginosa (strain ATCC 15692 / PAO1 / 1C / PRS 101 / LMG 12228) GN=murC PE=3 SV=1	1	1	1
	sp|Q9HWC8|RL7_PSEAE			>sp|Q9HWC8|RL7_PSEAE 50S ribosomal protein L7/L12 OS=Pseudomonas aeruginosa (strain ATCC 15692 / PAO1 / 1C / PRS 101 / LMG 12228) GN=rplL PE=3 SV=1	1	1	1
	sp|Q9HWC9|RPOC_PSEAE			>sp|Q9HWC9|RPOC_PSEAE DNA-directed RNA polymerase subunit beta OS=Pseudomonas aeruginosa (strain ATCC 15692 / PAO1 / 1C / PRS 101 / LMG 12228) GN=rpoC PE=3 SV=1	1	36	36
	sp|Q9HWD2|EFG1_PSEAE;sp|Q9I244|EFG2_PSEAE			>sp|Q9HWD2|EFG1_PSEAE Elongation factor G 1 OS=Pseudomonas aeruginosa (strain ATCC 15692 / PAO1 / 1C / PRS 101 / LMG 12228) GN=fusA PE=1 SV=1	2	20	20
	sp|Q9HWD5|RL3_PSEAE			>sp|Q9HWD5|RL3_PSEAE 50S ribosomal protein L3 OS=Pseudomonas aeruginosa (strain ATCC 15692 / PAO1 / 1C / PRS 101 / LMG 12228) GN=rplC PE=3 SV=1	1	2	2
	sp|Q9HWD8|RL2_PSEAE			>sp|Q9HWD8|RL2_PSEAE 50S ribosomal protein L2 OS=Pseudomonas aeruginosa (strain ATCC 15692 / PAO1 / 1C / PRS 101 / LMG 12228) GN=rplB PE=3 SV=1	1	4	4
	sp|Q9HWE1|RS3_PSEAE			>sp|Q9HWE1|RS3_PSEAE 30S ribosomal protein S3 OS=Pseudomonas aeruginosa (strain ATCC 15692 / PAO1 / 1C / PRS 101 / LMG 12228) GN=rpsC PE=3 SV=1	1	4	4
	sp|Q9HWE2|RL16_PSEAE			>sp|Q9HWE2|RL16_PSEAE 50S ribosomal protein L16 OS=Pseudomonas aeruginosa (strain ATCC 15692 / PAO1 / 1C / PRS 101 / LMG 12228) GN=rplP PE=3 SV=1	1	3	3
	sp|Q9HWE5|RL14_PSEAE			>sp|Q9HWE5|RL14_PSEAE 50S ribosomal protein L14 OS=Pseudomonas aeruginosa (strain ATCC 15692 / PAO1 / 1C / PRS 101 / LMG 12228) GN=rplN PE=3 SV=1	1	3	3
	sp|Q9HWE8|RS14_PSEAE			>sp|Q9HWE8|RS14_PSEAE 30S ribosomal protein S14 OS=Pseudomonas aeruginosa (strain ATCC 15692 / PAO1 / 1C / PRS 101 / LMG 12228) GN=rpsN PE=3 SV=1	1	1	1
	sp|Q9HWF2|RS5_PSEAE			>sp|Q9HWF2|RS5_PSEAE 30S ribosomal protein S5 OS=Pseudomonas aeruginosa (strain ATCC 15692 / PAO1 / 1C / PRS 101 / LMG 12228) GN=rpsE PE=3 SV=1	1	4	4
	sp|Q9HWF7|RS13_PSEAE			>sp|Q9HWF7|RS13_PSEAE 30S ribosomal protein S13 OS=Pseudomonas aeruginosa (strain ATCC 15692 / PAO1 / 1C / PRS 101 / LMG 12228) GN=rpsM PE=3 SV=1	1	1	1
	sp|Q9HWF8|RS11_PSEAE			>sp|Q9HWF8|RS11_PSEAE 30S ribosomal protein S11 OS=Pseudomonas aeruginosa (strain ATCC 15692 / PAO1 / 1C / PRS 101 / LMG 12228) GN=rpsK PE=3 SV=1	1	1	1
	sp|Q9HWG0|UVRA_PSEAE			>sp|Q9HWG0|UVRA_PSEAE UvrABC system protein A OS=Pseudomonas aeruginosa (strain ATCC 15692 / PAO1 / 1C / PRS 101 / LMG 12228) GN=uvrA PE=3 SV=1	1	2	2
	sp|Q9HWZ6|IPYR_PSEAE			>sp|Q9HWZ6|IPYR_PSEAE Inorganic pyrophosphatase OS=Pseudomonas aeruginosa (strain ATCC 15692 / PAO1 / 1C / PRS 101 / LMG 12228) GN=ppa PE=1 SV=1	1	1	1
	sp|Q9HX33|SYL_PSEAE			>sp|Q9HX33|SYL_PSEAE Leucine--tRNA ligase OS=Pseudomonas aeruginosa (strain ATCC 15692 / PAO1 / 1C / PRS 101 / LMG 12228) GN=leuS PE=3 SV=1	1	2	2
	sp|Q9HXJ4|ISPG_PSEAE			>sp|Q9HXJ4|ISPG_PSEAE 4-hydroxy-3-methylbut-2-en-1-yl diphosphate synthase (flavodoxin) OS=Pseudomonas aeruginosa (strain ATCC 15692 / PAO1 / 1C / PRS 101 / LMG 12228) GN=ispG PE=3 SV=1	1	1	1
	sp|Q9HXN2|PUR4_PSEAE			>sp|Q9HXN2|PUR4_PSEAE Phosphoribosylformylglycinamidine synthase OS=Pseudomonas aeruginosa (strain ATCC 15692 / PAO1 / 1C / PRS 101 / LMG 12228) GN=purL PE=3 SV=1	1	1	1
	sp|Q9HXZ1|DPO3A_PSEAE			>sp|Q9HXZ1|DPO3A_PSEAE DNA polymerase III subunit alpha OS=Pseudomonas aeruginosa (strain ATCC 15692 / PAO1 / 1C / PRS 101 / LMG 12228) GN=dnaE PE=3 SV=1	1	1	1
	sp|Q9HXZ2|ACCA_PSEAE			>sp|Q9HXZ2|ACCA_PSEAE Acetyl-coenzyme A carboxylase carboxyl transferase subunit alpha OS=Pseudomonas aeruginosa (strain ATCC 15692 / PAO1 / 1C / PRS 101 / LMG 12228) GN=accA PE=1 SV=1	1	1	1
	sp|Q9HXZ4|PYRG_PSEAE			>sp|Q9HXZ4|PYRG_PSEAE CTP synthase OS=Pseudomonas aeruginosa (strain ATCC 15692 / PAO1 / 1C / PRS 101 / LMG 12228) GN=pyrG PE=3 SV=1	1	9	9
	sp|Q9HXZ5|ENO_PSEAE			>sp|Q9HXZ5|ENO_PSEAE Enolase OS=Pseudomonas aeruginosa (strain ATCC 15692 / PAO1 / 1C / PRS 101 / LMG 12228) GN=eno PE=3 SV=1	1	3	3
	sp|Q9HY84|ASSY_PSEAE			>sp|Q9HY84|ASSY_PSEAE Argininosuccinate synthase OS=Pseudomonas aeruginosa (strain ATCC 15692 / PAO1 / 1C / PRS 101 / LMG 12228) GN=argG PE=3 SV=1	1	2	2
	sp|Q9HYC7|SYM_PSEAE			>sp|Q9HYC7|SYM_PSEAE Methionine--tRNA ligase OS=Pseudomonas aeruginosa (strain ATCC 15692 / PAO1 / 1C / PRS 101 / LMG 12228) GN=metG PE=3 SV=1	1	1	1
	sp|Q9HYD5|MAO1_PSEAE			>sp|Q9HYD5|MAO1_PSEAE NAD-dependent malic enzyme OS=Pseudomonas aeruginosa (strain ATCC 15692 / PAO1 / 1C / PRS 101 / LMG 12228) GN=maeA PE=3 SV=1	1	2	2
	sp|Q9HYL2|NOSZ_PSEAE			>sp|Q9HYL2|NOSZ_PSEAE Nitrous-oxide reductase OS=Pseudomonas aeruginosa (strain ATCC 15692 / PAO1 / 1C / PRS 101 / LMG 12228) GN=nosZ PE=3 SV=1	1	1	1
	sp|Q9HYQ8|HLDD_PSEAE			>sp|Q9HYQ8|HLDD_PSEAE ADP-L-glycero-D-manno-heptose-6-epimerase OS=Pseudomonas aeruginosa (strain ATCC 15692 / PAO1 / 1C / PRS 101 / LMG 12228) GN=hldD PE=3 SV=2	1	1	1
	sp|Q9HZ71|RS1_PSEAE			>sp|Q9HZ71|RS1_PSEAE 30S ribosomal protein S1 OS=Pseudomonas aeruginosa (strain ATCC 15692 / PAO1 / 1C / PRS 101 / LMG 12228) GN=rpsA PE=3 SV=1	1	9	9
	sp|Q9HZ76|WBPE_PSEAE			>sp|Q9HZ76|WBPE_PSEAE UDP-2-acetamido-2-deoxy-3-oxo-D-glucuronate aminotransferase OS=Pseudomonas aeruginosa (strain ATCC 15692 / PAO1 / 1C / PRS 101 / LMG 12228) GN=wbpE PE=1 SV=1	1	5	5
	sp|Q9HZA7|ACCD_PSEAE			>sp|Q9HZA7|ACCD_PSEAE Acetyl-coenzyme A carboxylase carboxyl transferase subunit beta OS=Pseudomonas aeruginosa (strain ATCC 15692 / PAO1 / 1C / PRS 101 / LMG 12228) GN=accD PE=1 SV=1	1	2	2
	sp|Q9HZE0|DHE2_PSEAE			>sp|Q9HZE0|DHE2_PSEAE NAD-specific glutamate dehydrogenase OS=Pseudomonas aeruginosa (strain ATCC 15692 / PAO1 / 1C / PRS 101 / LMG 12228) GN=gdhB PE=1 SV=1	1	40	40
	sp|Q9HZJ2|FADB_PSEAE			>sp|Q9HZJ2|FADB_PSEAE Fatty acid oxidation complex subunit alpha OS=Pseudomonas aeruginosa (strain ATCC 15692 / PAO1 / 1C / PRS 101 / LMG 12228) GN=fadB PE=3 SV=1	1	9	9
	sp|Q9HZJ3|FADA_PSEAE			>sp|Q9HZJ3|FADA_PSEAE 3-ketoacyl-CoA thiolase OS=Pseudomonas aeruginosa (strain ATCC 15692 / PAO1 / 1C / PRS 101 / LMG 12228) GN=fadA PE=3 SV=1	1	2	2
	sp|Q9HZP6|ETFB_PSEAE			>sp|Q9HZP6|ETFB_PSEAE Electron transfer flavoprotein subunit beta OS=Pseudomonas aeruginosa (strain ATCC 15692 / PAO1 / 1C / PRS 101 / LMG 12228) GN=etfB PE=3 SV=1	1	2	2
	sp|Q9I099|SYT_PSEAE			>sp|Q9I099|SYT_PSEAE Threonine--tRNA ligase OS=Pseudomonas aeruginosa (strain ATCC 15692 / PAO1 / 1C / PRS 101 / LMG 12228) GN=thrS PE=3 SV=1	1	1	1
	sp|Q9I0A2|RL20_PSEAE			>sp|Q9I0A2|RL20_PSEAE 50S ribosomal protein L20 OS=Pseudomonas aeruginosa (strain ATCC 15692 / PAO1 / 1C / PRS 101 / LMG 12228) GN=rplT PE=3 SV=1	1	2	2
	sp|Q9I0J1|NUOL_PSEAE			>sp|Q9I0J1|NUOL_PSEAE NADH-quinone oxidoreductase subunit L OS=Pseudomonas aeruginosa (strain ATCC 15692 / PAO1 / 1C / PRS 101 / LMG 12228) GN=nuoL PE=3 SV=1	1	1	1
	sp|Q9I0J5|NUOH_PSEAE			>sp|Q9I0J5|NUOH_PSEAE NADH-quinone oxidoreductase subunit H OS=Pseudomonas aeruginosa (strain ATCC 15692 / PAO1 / 1C / PRS 101 / LMG 12228) GN=nuoH PE=3 SV=1	1	1	1
	sp|Q9I0J6|NUOG_PSEAE			>sp|Q9I0J6|NUOG_PSEAE NADH-quinone oxidoreductase subunit G OS=Pseudomonas aeruginosa (strain ATCC 15692 / PAO1 / 1C / PRS 101 / LMG 12228) GN=nuoG PE=3 SV=1	1	13	13
	sp|Q9I0J7|NUOF_PSEAE			>sp|Q9I0J7|NUOF_PSEAE NADH-quinone oxidoreductase subunit F OS=Pseudomonas aeruginosa (strain ATCC 15692 / PAO1 / 1C / PRS 101 / LMG 12228) GN=nuoF PE=3 SV=1	1	4	4
	sp|Q9I0J9|NUOCD_PSEAE			>sp|Q9I0J9|NUOCD_PSEAE NADH-quinone oxidoreductase subunit C/D OS=Pseudomonas aeruginosa (strain ATCC 15692 / PAO1 / 1C / PRS 101 / LMG 12228) GN=nuoC PE=3 SV=1	1	8	8
	sp|Q9I0K4|ACEA_PSEAE			>sp|Q9I0K4|ACEA_PSEAE Isocitrate lyase OS=Pseudomonas aeruginosa (strain ATCC 15692 / PAO1 / 1C / PRS 101 / LMG 12228) GN=PA2634 PE=1 SV=1	1	12	12
	sp|Q9I0Q0|PQSH_PSEAE			>sp|Q9I0Q0|PQSH_PSEAE 2-heptyl-3-hydroxy-4(1H)-quinolone synthase OS=Pseudomonas aeruginosa (strain ATCC 15692 / PAO1 / 1C / PRS 101 / LMG 12228) GN=pqsH PE=3 SV=1	1	1	1
	sp|Q9I1L9|DLDH1_PSEAE			>sp|Q9I1L9|DLDH1_PSEAE Dihydrolipoyl dehydrogenase OS=Pseudomonas aeruginosa (strain ATCC 15692 / PAO1 / 1C / PRS 101 / LMG 12228) GN=lpdV PE=1 SV=1	1	1	1
	sp|Q9I1S2|HCNB_PSEAE			>sp|Q9I1S2|HCNB_PSEAE Hydrogen cyanide synthase subunit HcnB OS=Pseudomonas aeruginosa (strain ATCC 15692 / PAO1 / 1C / PRS 101 / LMG 12228) GN=hcnB PE=1 SV=1	1	7	7
	sp|Q9I2A8|ATOB_PSEAE			>sp|Q9I2A8|ATOB_PSEAE Acetyl-CoA acetyltransferase OS=Pseudomonas aeruginosa (strain ATCC 15692 / PAO1 / 1C / PRS 101 / LMG 12228) GN=atoB PE=3 SV=1	1	4	4
	sp|Q9I2U8|SYQ_PSEAE			>sp|Q9I2U8|SYQ_PSEAE Glutamine--tRNA ligase OS=Pseudomonas aeruginosa (strain ATCC 15692 / PAO1 / 1C / PRS 101 / LMG 12228) GN=glnS PE=1 SV=1	1	1	1
	sp|Q9I2V5|ACNB_PSEAE			>sp|Q9I2V5|ACNB_PSEAE Aconitate hydratase B OS=Pseudomonas aeruginosa (strain ATCC 15692 / PAO1 / 1C / PRS 101 / LMG 12228) GN=acnB PE=3 SV=1	1	17	17
	sp|Q9I383|SELD_PSEAE			>sp|Q9I383|SELD_PSEAE Selenide, water dikinase OS=Pseudomonas aeruginosa (strain ATCC 15692 / PAO1 / 1C / PRS 101 / LMG 12228) GN=selD PE=3 SV=1	1	2	2
	sp|Q9I3A8|GPDA_PSEAE			>sp|Q9I3A8|GPDA_PSEAE Glycerol-3-phosphate dehydrogenase [NAD(P)+] OS=Pseudomonas aeruginosa (strain ATCC 15692 / PAO1 / 1C / PRS 101 / LMG 12228) GN=gpsA PE=3 SV=1	1	1	1
	sp|Q9I3D1|DLDH2_PSEAE			>sp|Q9I3D1|DLDH2_PSEAE Dihydrolipoyl dehydrogenase OS=Pseudomonas aeruginosa (strain ATCC 15692 / PAO1 / 1C / PRS 101 / LMG 12228) GN=lpdG PE=3 SV=1	1	11	11
	sp|Q9I3D2|ODO2_PSEAE			>sp|Q9I3D2|ODO2_PSEAE Dihydrolipoyllysine-residue succinyltransferase component of 2-oxoglutarate dehydrogenase complex OS=Pseudomonas aeruginosa (strain ATCC 15692 / PAO1 / 1C / PRS 101 / LMG 12228) GN=sucB PE=3 SV=1	1	2	2
	sp|Q9I3F5|ACNA_PSEAE			>sp|Q9I3F5|ACNA_PSEAE Aconitate hydratase A OS=Pseudomonas aeruginosa (strain ATCC 15692 / PAO1 / 1C / PRS 101 / LMG 12228) GN=acnA PE=3 SV=1	1	16	16
	sp|Q9I3I0|Y1533_PSEAE			>sp|Q9I3I0|Y1533_PSEAE Nucleoid-associated protein PA1533 OS=Pseudomonas aeruginosa (strain ATCC 15692 / PAO1 / 1C / PRS 101 / LMG 12228) GN=PA1533 PE=3 SV=1	1	1	1
	sp|Q9I558|ACSA1_PSEAE			>sp|Q9I558|ACSA1_PSEAE Acetyl-coenzyme A synthetase 1 OS=Pseudomonas aeruginosa (strain ATCC 15692 / PAO1 / 1C / PRS 101 / LMG 12228) GN=acsA1 PE=3 SV=1	1	4	4
	sp|Q9I576|HPPD_PSEAE			>sp|Q9I576|HPPD_PSEAE 4-hydroxyphenylpyruvate dioxygenase OS=Pseudomonas aeruginosa (strain ATCC 15692 / PAO1 / 1C / PRS 101 / LMG 12228) GN=hpd PE=3 SV=1	1	1	1
	sp|Q9I5A5|PTA_PSEAE			>sp|Q9I5A5|PTA_PSEAE Phosphate acetyltransferase OS=Pseudomonas aeruginosa (strain ATCC 15692 / PAO1 / 1C / PRS 101 / LMG 12228) GN=pta PE=1 SV=1	1	1	1
	sp|Q9I5Y4|PGK_PSEAE			>sp|Q9I5Y4|PGK_PSEAE Phosphoglycerate kinase OS=Pseudomonas aeruginosa (strain ATCC 15692 / PAO1 / 1C / PRS 101 / LMG 12228) GN=pgk PE=3 SV=1	1	1	1
	sp|Q9I5Z0|METK_PSEAE			>sp|Q9I5Z0|METK_PSEAE S-adenosylmethionine synthase OS=Pseudomonas aeruginosa (strain ATCC 15692 / PAO1 / 1C / PRS 101 / LMG 12228) GN=metK PE=3 SV=1	1	5	5
	sp|Q9I636|MASZ_PSEAE			>sp|Q9I636|MASZ_PSEAE Malate synthase G OS=Pseudomonas aeruginosa (strain ATCC 15692 / PAO1 / 1C / PRS 101 / LMG 12228) GN=glcB PE=3 SV=1	1	2	2
	sp|Q9I685|SAHH_PSEAE			>sp|Q9I685|SAHH_PSEAE Adenosylhomocysteinase OS=Pseudomonas aeruginosa (strain ATCC 15692 / PAO1 / 1C / PRS 101 / LMG 12228) GN=ahcY PE=3 SV=1	1	17	17
	sp|Q9I6E0|ILVD_PSEAE			>sp|Q9I6E0|ILVD_PSEAE Dihydroxy-acid dehydratase OS=Pseudomonas aeruginosa (strain ATCC 15692 / PAO1 / 1C / PRS 101 / LMG 12228) GN=ilvD PE=3 SV=1	1	1	1
	sp|Q9I6M4|DAVT_PSEAE			>sp|Q9I6M4|DAVT_PSEAE 5-aminovalerate aminotransferase DavT OS=Pseudomonas aeruginosa (strain ATCC 15692 / PAO1 / 1C / PRS 101 / LMG 12228) GN=davT PE=1 SV=1	1	2	2
	sp|Q9I6M5|DAVD_PSEAE			>sp|Q9I6M5|DAVD_PSEAE Glutarate-semialdehyde dehydrogenase DavD OS=Pseudomonas aeruginosa (strain ATCC 15692 / PAO1 / 1C / PRS 101 / LMG 12228) GN=davD PE=1 SV=1	1	2	2
	sp|Q9I742|CLPV1_PSEAE			>sp|Q9I742|CLPV1_PSEAE Protein ClpV1 OS=Pseudomonas aeruginosa (strain ATCC 15692 / PAO1 / 1C / PRS 101 / LMG 12228) GN=clpV1 PE=1 SV=1	1	3	3
	sp|Q9I7B8|SYGB_PSEAE			>sp|Q9I7B8|SYGB_PSEAE Glycine--tRNA ligase beta subunit OS=Pseudomonas aeruginosa (strain ATCC 15692 / PAO1 / 1C / PRS 101 / LMG 12228) GN=glyS PE=3 SV=1	1	1	1
	sp|Q9I7C2|GYRB_PSEAE			>sp|Q9I7C2|GYRB_PSEAE DNA gyrase subunit B OS=Pseudomonas aeruginosa (strain ATCC 15692 / PAO1 / 1C / PRS 101 / LMG 12228) GN=gyrB PE=3 SV=1	1	5	5
	sp|Q9S646|PPK_PSEAE			>sp|Q9S646|PPK_PSEAE Polyphosphate kinase OS=Pseudomonas aeruginosa (strain ATCC 15692 / PAO1 / 1C / PRS 101 / LMG 12228) GN=ppk PE=3 SV=1	1	2	2
	sp|Q9XCL6|SYE_PSEAE			>sp|Q9XCL6|SYE_PSEAE Glutamate--tRNA ligase OS=Pseudomonas aeruginosa (strain ATCC 15692 / PAO1 / 1C / PRS 101 / LMG 12228) GN=gltX PE=3 SV=2	1	1	1
	sp|Q9ZFK4|KDSA_PSEAE			>sp|Q9ZFK4|KDSA_PSEAE 2-dehydro-3-deoxyphosphooctonate aldolase OS=Pseudomonas aeruginosa (strain ATCC 15692 / PAO1 / 1C / PRS 101 / LMG 12228) GN=kdsA PE=1 SV=1	1	1	1
	tr|G3XDA2|G3XDA2_PSEAE			>tr|G3XDA2|G3XDA2_PSEAE 3-oxoacyl-[acyl-carrier-protein] synthase 2 OS=Pseudomonas aeruginosa (strain ATCC 15692 / PAO1 / 1C / PRS 101 / LMG 12228) GN=fabF1 PE=1 SV=1	1	1	1
	tr|Q9HTD1|Q9HTD1_PSEAE			>tr|Q9HTD1|Q9HTD1_PSEAE Probable transcarboxylase subunit OS=Pseudomonas aeruginosa (strain ATCC 15692 / PAO1 / 1C / PRS 101 / LMG 12228) GN=PA5435 PE=4 SV=1	1	25	25
	tr|Q9HTD9|Q9HTD9_PSEAE			>tr|Q9HTD9|Q9HTD9_PSEAE Alcohol dehydrogenase OS=Pseudomonas aeruginosa (strain ATCC 15692 / PAO1 / 1C / PRS 101 / LMG 12228) GN=adhA PE=1 SV=1	1	9	9
	tr|Q9HU11|Q9HU11_PSEAE			>tr|Q9HU11|Q9HU11_PSEAE Uncharacterized protein OS=Pseudomonas aeruginosa (strain ATCC 15692 / PAO1 / 1C / PRS 101 / LMG 12228) GN=PA5178 PE=4 SV=1	1	1	1
	tr|Q9HU24|Q9HU24_PSEAE			>tr|Q9HU24|Q9HU24_PSEAE dTDP-glucose 4,6-dehydratase OS=Pseudomonas aeruginosa (strain ATCC 15692 / PAO1 / 1C / PRS 101 / LMG 12228) GN=rmlB PE=3 SV=1	1	2	2
	tr|Q9HU38|Q9HU38_PSEAE			>tr|Q9HU38|Q9HU38_PSEAE Uncharacterized protein OS=Pseudomonas aeruginosa (strain ATCC 15692 / PAO1 / 1C / PRS 101 / LMG 12228) GN=PA5146 PE=4 SV=1	1	1	1
	tr|Q9HUD3|Q9HUD3_PSEAE			>tr|Q9HUD3|Q9HUD3_PSEAE Malic enzyme OS=Pseudomonas aeruginosa (strain ATCC 15692 / PAO1 / 1C / PRS 101 / LMG 12228) GN=PA5046 PE=4 SV=1	1	1	1
	tr|Q9HUG0|Q9HUG0_PSEAE			>tr|Q9HUG0|Q9HUG0_PSEAE Probable carbamoyl transferase OS=Pseudomonas aeruginosa (strain ATCC 15692 / PAO1 / 1C / PRS 101 / LMG 12228) GN=PA5005 PE=4 SV=1	1	3	3
	tr|Q9HV96|Q9HV96_PSEAE			>tr|Q9HV96|Q9HV96_PSEAE Uncharacterized protein OS=Pseudomonas aeruginosa (strain ATCC 15692 / PAO1 / 1C / PRS 101 / LMG 12228) GN=PA4701 PE=4 SV=1	1	5	5
	tr|Q9HVA0|Q9HVA0_PSEAE			>tr|Q9HVA0|Q9HVA0_PSEAE Acetolactate synthase OS=Pseudomonas aeruginosa (strain ATCC 15692 / PAO1 / 1C / PRS 101 / LMG 12228) GN=ilvI PE=3 SV=1	1	2	2
	tr|Q9HVF9|Q9HVF9_PSEAE			>tr|Q9HVF9|Q9HVF9_PSEAE Uncharacterized protein OS=Pseudomonas aeruginosa (strain ATCC 15692 / PAO1 / 1C / PRS 101 / LMG 12228) GN=PA4632 PE=3 SV=1	1	1	1
	tr|Q9HVJ1|Q9HVJ1_PSEAE			>tr|Q9HVJ1|Q9HVJ1_PSEAE Probable ATP-binding component of ABC transporter OS=Pseudomonas aeruginosa (strain ATCC 15692 / PAO1 / 1C / PRS 101 / LMG 12228) GN=PA4595 PE=4 SV=1	1	4	4
	tr|Q9HVS8|Q9HVS8_PSEAE			>tr|Q9HVS8|Q9HVS8_PSEAE RoxR OS=Pseudomonas aeruginosa (strain ATCC 15692 / PAO1 / 1C / PRS 101 / LMG 12228) GN=roxR PE=4 SV=1	1	1	1
	tr|Q9HVU0|Q9HVU0_PSEAE			>tr|Q9HVU0|Q9HVU0_PSEAE Rod shape-determining protein MreB OS=Pseudomonas aeruginosa (strain ATCC 15692 / PAO1 / 1C / PRS 101 / LMG 12228) GN=mreB PE=4 SV=1	1	4	4
	tr|Q9HVY5|Q9HVY5_PSEAE			>tr|Q9HVY5|Q9HVY5_PSEAE Cytochrome b OS=Pseudomonas aeruginosa (strain ATCC 15692 / PAO1 / 1C / PRS 101 / LMG 12228) GN=PA4430 PE=3 SV=1	1	2	2
	tr|Q9HVY6|Q9HVY6_PSEAE			>tr|Q9HVY6|Q9HVY6_PSEAE Probable cytochrome c1 OS=Pseudomonas aeruginosa (strain ATCC 15692 / PAO1 / 1C / PRS 101 / LMG 12228) GN=PA4429 PE=4 SV=1	1	1	1
	tr|Q9HW15|Q9HW15_PSEAE			>tr|Q9HW15|Q9HW15_PSEAE Probable short-chain dehydrogenase OS=Pseudomonas aeruginosa (strain ATCC 15692 / PAO1 / 1C / PRS 101 / LMG 12228) GN=speA PE=4 SV=1	1	1	1
	tr|Q9HW49|Q9HW49_PSEAE			>tr|Q9HW49|Q9HW49_PSEAE Uncharacterized protein OS=Pseudomonas aeruginosa (strain ATCC 15692 / PAO1 / 1C / PRS 101 / LMG 12228) GN=PA4352 PE=3 SV=1	1	3	3
	tr|Q9HW72|Q9HW72_PSEAE			>tr|Q9HW72|Q9HW72_PSEAE Pyruvate kinase OS=Pseudomonas aeruginosa (strain ATCC 15692 / PAO1 / 1C / PRS 101 / LMG 12228) GN=pykA PE=3 SV=1	1	1	1
	tr|Q9HWG9|Q9HWG9_PSEAE			>tr|Q9HWG9|Q9HWG9_PSEAE Flavin-containing monooxygenase OS=Pseudomonas aeruginosa (strain ATCC 15692 / PAO1 / 1C / PRS 101 / LMG 12228) GN=phzS PE=1 SV=1	1	5	5
	tr|Q9HWP8|Q9HWP8_PSEAE			>tr|Q9HWP8|Q9HWP8_PSEAE Cytochrome c oxidase subunit (Cbb3-type) OS=Pseudomonas aeruginosa (strain ATCC 15692 / PAO1 / 1C / PRS 101 / LMG 12228) GN=PA4133 PE=3 SV=1	1	2	2
	tr|Q9HWQ0|Q9HWQ0_PSEAE			>tr|Q9HWQ0|Q9HWQ0_PSEAE Probable iron-sulfur protein OS=Pseudomonas aeruginosa (strain ATCC 15692 / PAO1 / 1C / PRS 101 / LMG 12228) GN=PA4131 PE=4 SV=1	1	6	6
	tr|Q9I2C4|Q9I2C4_PSEAE;tr|Q9HX05|Q9HX05_PSEAE			>tr|Q9I2C4|Q9I2C4_PSEAE NAD+ dependent aldehyde dehydrogenase ExaC OS=Pseudomonas aeruginosa (strain ATCC 15692 / PAO1 / 1C / PRS 101 / LMG 12228) GN=exaC PE=3 SV=1;>tr|Q9HX05|Q9HX05_PSEAE Probable aldehyde dehydrogenase OS=Pseudomonas aeruginosa (strain A	2	3	3
	tr|Q9HX44|Q9HX44_PSEAE			>tr|Q9HX44|Q9HX44_PSEAE Probable acyl-CoA dehydrogenase OS=Pseudomonas aeruginosa (strain ATCC 15692 / PAO1 / 1C / PRS 101 / LMG 12228) GN=PA3972 PE=3 SV=1	1	1	1
	tr|Q9HY01|Q9HY01_PSEAE			>tr|Q9HY01|Q9HY01_PSEAE S-(hydroxymethyl)glutathione dehydrogenase OS=Pseudomonas aeruginosa (strain ATCC 15692 / PAO1 / 1C / PRS 101 / LMG 12228) GN=adhC PE=3 SV=1	1	2	2
	tr|Q9HY13|Q9HY13_PSEAE			>tr|Q9HY13|Q9HY13_PSEAE Uncharacterized protein OS=Pseudomonas aeruginosa (strain ATCC 15692 / PAO1 / 1C / PRS 101 / LMG 12228) GN=PA3613 PE=4 SV=1	1	11	11
	tr|Q9HY81|Q9HY81_PSEAE			>tr|Q9HY81|Q9HY81_PSEAE Probable peroxidase OS=Pseudomonas aeruginosa (strain ATCC 15692 / PAO1 / 1C / PRS 101 / LMG 12228) GN=PA3529 PE=1 SV=1	1	2	2
	tr|Q9HYR4|Q9HYR4_PSEAE			>tr|Q9HYR4|Q9HYR4_PSEAE Cytochrome P450 OS=Pseudomonas aeruginosa (strain ATCC 15692 / PAO1 / 1C / PRS 101 / LMG 12228) GN=PA3331 PE=3 SV=1	1	1	1
	tr|Q9HYR6|Q9HYR6_PSEAE			>tr|Q9HYR6|Q9HYR6_PSEAE Uncharacterized protein OS=Pseudomonas aeruginosa (strain ATCC 15692 / PAO1 / 1C / PRS 101 / LMG 12228) GN=PA3329 PE=4 SV=1	1	2	2
	tr|Q9HYR7|Q9HYR7_PSEAE			>tr|Q9HYR7|Q9HYR7_PSEAE Probable FAD-dependent monooxygenase OS=Pseudomonas aeruginosa (strain ATCC 15692 / PAO1 / 1C / PRS 101 / LMG 12228) GN=PA3328 PE=4 SV=1	1	2	2
	tr|Q9HYR8|Q9HYR8_PSEAE			>tr|Q9HYR8|Q9HYR8_PSEAE Probable non-ribosomal peptide synthetase OS=Pseudomonas aeruginosa (strain ATCC 15692 / PAO1 / 1C / PRS 101 / LMG 12228) GN=PA3327 PE=4 SV=1	1	26	26
	tr|Q9HYT5|Q9HYT5_PSEAE			>tr|Q9HYT5|Q9HYT5_PSEAE Uncharacterized protein OS=Pseudomonas aeruginosa (strain ATCC 15692 / PAO1 / 1C / PRS 101 / LMG 12228) GN=PA3309 PE=3 SV=1	1	4	4
	tr|Q9HYZ6|Q9HYZ6_PSEAE			>tr|Q9HYZ6|Q9HYZ6_PSEAE Site-determining protein OS=Pseudomonas aeruginosa (strain ATCC 15692 / PAO1 / 1C / PRS 101 / LMG 12228) GN=minD PE=3 SV=1	1	2	2
	tr|Q9HZ78|Q9HZ78_PSEAE			>tr|Q9HZ78|Q9HZ78_PSEAE LPS biosynthesis protein WbpG OS=Pseudomonas aeruginosa (strain ATCC 15692 / PAO1 / 1C / PRS 101 / LMG 12228) GN=wbpG PE=4 SV=1	1	3	3
	tr|Q9HZA6|Q9HZA6_PSEAE			>tr|Q9HZA6|Q9HZA6_PSEAE Motility protein FimV OS=Pseudomonas aeruginosa (strain ATCC 15692 / PAO1 / 1C / PRS 101 / LMG 12228) GN=fimV PE=1 SV=1	1	1	1
	tr|Q9HZC5|Q9HZC5_PSEAE			>tr|Q9HZC5|Q9HZC5_PSEAE Aminopeptidase N OS=Pseudomonas aeruginosa (strain ATCC 15692 / PAO1 / 1C / PRS 101 / LMG 12228) GN=pepN PE=4 SV=1	1	3	3
	tr|Q9HZI0|Q9HZI0_PSEAE			>tr|Q9HZI0|Q9HZI0_PSEAE Uncharacterized protein OS=Pseudomonas aeruginosa (strain ATCC 15692 / PAO1 / 1C / PRS 101 / LMG 12228) GN=PA3026 PE=4 SV=1	1	1	1
	tr|Q9HZK4|Q9HZK4_PSEAE			>tr|Q9HZK4|Q9HZK4_PSEAE Glyceraldehyde-3-phosphate dehydrogenase OS=Pseudomonas aeruginosa (strain ATCC 15692 / PAO1 / 1C / PRS 101 / LMG 12228) GN=PA3001 PE=3 SV=1	1	10	10
	tr|Q9HZV6|Q9HZV6_PSEAE			>tr|Q9HZV6|Q9HZV6_PSEAE Geranyl-CoA carboxylase, alpha-subunit (Biotin-containing) OS=Pseudomonas aeruginosa (strain ATCC 15692 / PAO1 / 1C / PRS 101 / LMG 12228) GN=atuF PE=4 SV=1	1	1	1
	tr|Q9I015|Q9I015_PSEAE			>tr|Q9I015|Q9I015_PSEAE Probable aminotransferase OS=Pseudomonas aeruginosa (strain ATCC 15692 / PAO1 / 1C / PRS 101 / LMG 12228) GN=PA2828 PE=4 SV=1	1	1	1
	tr|Q9I028|Q9I028_PSEAE			>tr|Q9I028|Q9I028_PSEAE Probable acyl-CoA dehydrogenase OS=Pseudomonas aeruginosa (strain ATCC 15692 / PAO1 / 1C / PRS 101 / LMG 12228) GN=PA2815 PE=4 SV=1	1	4	4
	tr|Q9I056|Q9I056_PSEAE			>tr|Q9I056|Q9I056_PSEAE Carboxypeptidase G2 OS=Pseudomonas aeruginosa (strain ATCC 15692 / PAO1 / 1C / PRS 101 / LMG 12228) GN=cpg2 PE=4 SV=1	1	1	1
	tr|Q9I0L4|Q9I0L4_PSEAE			>tr|Q9I0L4|Q9I0L4_PSEAE Isocitrate dehydrogenase OS=Pseudomonas aeruginosa (strain ATCC 15692 / PAO1 / 1C / PRS 101 / LMG 12228) GN=idh PE=4 SV=1	1	6	6
	tr|Q9I0L5|Q9I0L5_PSEAE			>tr|Q9I0L5|Q9I0L5_PSEAE Isocitrate dehydrogenase [NADP] OS=Pseudomonas aeruginosa (strain ATCC 15692 / PAO1 / 1C / PRS 101 / LMG 12228) GN=icd PE=3 SV=1	1	12	12
	tr|Q9I0T1|Q9I0T1_PSEAE			>tr|Q9I0T1|Q9I0T1_PSEAE Probable acyl-CoA thiolase OS=Pseudomonas aeruginosa (strain ATCC 15692 / PAO1 / 1C / PRS 101 / LMG 12228) GN=PA2553 PE=3 SV=1	1	12	12
	tr|Q9I0T2|Q9I0T2_PSEAE			>tr|Q9I0T2|Q9I0T2_PSEAE Probable acyl-CoA dehydrogenase OS=Pseudomonas aeruginosa (strain ATCC 15692 / PAO1 / 1C / PRS 101 / LMG 12228) GN=PA2552 PE=3 SV=1	1	1	1
	tr|Q9I120|Q9I120_PSEAE			>tr|Q9I120|Q9I120_PSEAE Uncharacterized protein OS=Pseudomonas aeruginosa (strain ATCC 15692 / PAO1 / 1C / PRS 101 / LMG 12228) GN=PA2462 PE=4 SV=1	1	2	2
	tr|Q9I1H3|Q9I1H3_PSEAE			>tr|Q9I1H3|Q9I1H3_PSEAE AmbE OS=Pseudomonas aeruginosa (strain ATCC 15692 / PAO1 / 1C / PRS 101 / LMG 12228) GN=ambE PE=4 SV=1	1	6	6
	tr|Q9I1I5|Q9I1I5_PSEAE			>tr|Q9I1I5|Q9I1I5_PSEAE Glucose dehydrogenase OS=Pseudomonas aeruginosa (strain ATCC 15692 / PAO1 / 1C / PRS 101 / LMG 12228) GN=gcd PE=4 SV=1	1	2	2
	tr|Q9I1N7|Q9I1N7_PSEAE			>tr|Q9I1N7|Q9I1N7_PSEAE PslB OS=Pseudomonas aeruginosa (strain ATCC 15692 / PAO1 / 1C / PRS 101 / LMG 12228) GN=pslB PE=3 SV=1	1	2	2
	tr|Q9I1Z6|Q9I1Z6_PSEAE			>tr|Q9I1Z6|Q9I1Z6_PSEAE Alcohol dehydrogenase (Zn-dependent) OS=Pseudomonas aeruginosa (strain ATCC 15692 / PAO1 / 1C / PRS 101 / LMG 12228) GN=PA2119 PE=3 SV=1	1	3	3
	tr|Q9I246|Q9I246_PSEAE			>tr|Q9I246|Q9I246_PSEAE Probable carbamoyl transferase OS=Pseudomonas aeruginosa (strain ATCC 15692 / PAO1 / 1C / PRS 101 / LMG 12228) GN=PA2069 PE=4 SV=1	1	7	7
	tr|Q9I296|Q9I296_PSEAE			>tr|Q9I296|Q9I296_PSEAE Putative isovaleryl-CoA dehydrogenase OS=Pseudomonas aeruginosa (strain ATCC 15692 / PAO1 / 1C / PRS 101 / LMG 12228) GN=liuA PE=3 SV=1	1	2	2
	tr|Q9I297|Q9I297_PSEAE			>tr|Q9I297|Q9I297_PSEAE Methylcrotonyl-CoA carboxylase, beta-subunit OS=Pseudomonas aeruginosa (strain ATCC 15692 / PAO1 / 1C / PRS 101 / LMG 12228) GN=liuB PE=1 SV=1	1	1	1
	tr|Q9I299|Q9I299_PSEAE			>tr|Q9I299|Q9I299_PSEAE Methylcrotonyl-CoA carboxylase, alpha-subunit (Biotin-containing) OS=Pseudomonas aeruginosa (strain ATCC 15692 / PAO1 / 1C / PRS 101 / LMG 12228) GN=liuD PE=1 SV=1	1	10	10
	tr|Q9I2A9|Q9I2A9_PSEAE			>tr|Q9I2A9|Q9I2A9_PSEAE DhcB, dehydrocarnitine CoA transferase, subunit B OS=Pseudomonas aeruginosa (strain ATCC 15692 / PAO1 / 1C / PRS 101 / LMG 12228) GN=dhcB PE=4 SV=1	1	1	1
	tr|Q9I2V3|Q9I2V3_PSEAE			>tr|Q9I2V3|Q9I2V3_PSEAE Uncharacterized protein OS=Pseudomonas aeruginosa (strain ATCC 15692 / PAO1 / 1C / PRS 101 / LMG 12228) GN=PA1789 PE=1 SV=1	1	1	1
	tr|Q9I2W9|Q9I2W9_PSEAE			>tr|Q9I2W9|Q9I2W9_PSEAE Phosphoenolpyruvate synthase OS=Pseudomonas aeruginosa (strain ATCC 15692 / PAO1 / 1C / PRS 101 / LMG 12228) GN=ppsA PE=3 SV=1	1	4	4
	tr|Q9I2Z5|Q9I2Z5_PSEAE			>tr|Q9I2Z5|Q9I2Z5_PSEAE Probable amidotransferase OS=Pseudomonas aeruginosa (strain ATCC 15692 / PAO1 / 1C / PRS 101 / LMG 12228) GN=PA1742 PE=4 SV=1	1	1	1
	tr|Q9I3B2|Q9I3B2_PSEAE			>tr|Q9I3B2|Q9I3B2_PSEAE Beta-ketoacyl-ACP synthase I OS=Pseudomonas aeruginosa (strain ATCC 15692 / PAO1 / 1C / PRS 101 / LMG 12228) GN=fabB PE=3 SV=1	1	3	3
	tr|Q9I3D3|Q9I3D3_PSEAE			>tr|Q9I3D3|Q9I3D3_PSEAE 2-oxoglutarate dehydrogenase (E1 subunit) OS=Pseudomonas aeruginosa (strain ATCC 15692 / PAO1 / 1C / PRS 101 / LMG 12228) GN=sucA PE=4 SV=1	1	15	15
	tr|Q9I3D4|Q9I3D4_PSEAE			>tr|Q9I3D4|Q9I3D4_PSEAE Succinate dehydrogenase (B subunit) OS=Pseudomonas aeruginosa (strain ATCC 15692 / PAO1 / 1C / PRS 101 / LMG 12228) GN=sdhB PE=4 SV=1	1	5	5
	tr|Q9I3D5|Q9I3D5_PSEAE			>tr|Q9I3D5|Q9I3D5_PSEAE Succinate dehydrogenase flavoprotein subunit OS=Pseudomonas aeruginosa (strain ATCC 15692 / PAO1 / 1C / PRS 101 / LMG 12228) GN=sdhA PE=3 SV=1	1	14	14
	tr|Q9I3G0|Q9I3G0_PSEAE			>tr|Q9I3G0|Q9I3G0_PSEAE Cytochrome c oxidase, cbb3-type, CcoN subunit OS=Pseudomonas aeruginosa (strain ATCC 15692 / PAO1 / 1C / PRS 101 / LMG 12228) GN=ccoN2 PE=3 SV=1	1	2	2
	tr|Q9I3G1|Q9I3G1_PSEAE;tr|Q9I3G4|Q9I3G4_PSEAE			>tr|Q9I3G1|Q9I3G1_PSEAE Cytochrome c oxidase, cbb3-type, CcoO subunit OS=Pseudomonas aeruginosa (strain ATCC 15692 / PAO1 / 1C / PRS 101 / LMG 12228) GN=ccoO2 PE=4 SV=1	2	3	3
	tr|Q9I3G2|Q9I3G2_PSEAE			>tr|Q9I3G2|Q9I3G2_PSEAE Cbb3-type cytochrome c oxidase subunit OS=Pseudomonas aeruginosa (strain ATCC 15692 / PAO1 / 1C / PRS 101 / LMG 12228) GN=ccoP2 PE=3 SV=1	1	6	6
	tr|Q9I3G3|Q9I3G3_PSEAE			>tr|Q9I3G3|Q9I3G3_PSEAE Cytochrome c oxidase, cbb3-type, CcoN subunit OS=Pseudomonas aeruginosa (strain ATCC 15692 / PAO1 / 1C / PRS 101 / LMG 12228) GN=ccoN1 PE=3 SV=1	1	2	2
	tr|Q9I3G6|Q9I3G6_PSEAE			>tr|Q9I3G6|Q9I3G6_PSEAE Probable ferredoxin OS=Pseudomonas aeruginosa (strain ATCC 15692 / PAO1 / 1C / PRS 101 / LMG 12228) GN=PA1551 PE=4 SV=1	1	2	2
	tr|Q9I3X2|Q9I3X2_PSEAE			>tr|Q9I3X2|Q9I3X2_PSEAE Uncharacterized protein OS=Pseudomonas aeruginosa (strain ATCC 15692 / PAO1 / 1C / PRS 101 / LMG 12228) GN=PA1372 PE=4 SV=1	1	2	2
	tr|Q9I4I1|Q9I4I1_PSEAE			>tr|Q9I4I1|Q9I4I1_PSEAE Ribonucleoside-diphosphate reductase OS=Pseudomonas aeruginosa (strain ATCC 15692 / PAO1 / 1C / PRS 101 / LMG 12228) GN=nrdA PE=3 SV=1	1	4	4
	tr|Q9I4M1|Q9I4M1_PSEAE			>tr|Q9I4M1|Q9I4M1_PSEAE Uncharacterized protein OS=Pseudomonas aeruginosa (strain ATCC 15692 / PAO1 / 1C / PRS 101 / LMG 12228) GN=PA1114 PE=4 SV=1	1	1	1
	tr|Q9I4X1|Q9I4X1_PSEAE			>tr|Q9I4X1|Q9I4X1_PSEAE PqsC OS=Pseudomonas aeruginosa (strain ATCC 15692 / PAO1 / 1C / PRS 101 / LMG 12228) GN=pqsC PE=1 SV=1	1	4	4
	tr|Q9I4X2|Q9I4X2_PSEAE			>tr|Q9I4X2|Q9I4X2_PSEAE PqsB OS=Pseudomonas aeruginosa (strain ATCC 15692 / PAO1 / 1C / PRS 101 / LMG 12228) GN=pqsB PE=1 SV=1	1	1	1
	tr|Q9I5F6|Q9I5F6_PSEAE			>tr|Q9I5F6|Q9I5F6_PSEAE Bifunctional protein PutA OS=Pseudomonas aeruginosa (strain ATCC 15692 / PAO1 / 1C / PRS 101 / LMG 12228) GN=putA PE=3 SV=1	1	14	14
	tr|Q9I5I5|Q9I5I5_PSEAE			>tr|Q9I5I5|Q9I5I5_PSEAE Probable enoyl-CoA hydratase/isomerase OS=Pseudomonas aeruginosa (strain ATCC 15692 / PAO1 / 1C / PRS 101 / LMG 12228) GN=PA0744 PE=4 SV=1	1	1	1
	tr|Q9I5U9|Q9I5U9_PSEAE			>tr|Q9I5U9|Q9I5U9_PSEAE Uncharacterized protein OS=Pseudomonas aeruginosa (strain ATCC 15692 / PAO1 / 1C / PRS 101 / LMG 12228) GN=PA0588 PE=4 SV=1	1	14	14
	tr|Q9I5Y8|Q9I5Y8_PSEAE			>tr|Q9I5Y8|Q9I5Y8_PSEAE Transketolase OS=Pseudomonas aeruginosa (strain ATCC 15692 / PAO1 / 1C / PRS 101 / LMG 12228) GN=tktA PE=1 SV=1	1	2	2
	tr|Q9I612|Q9I612_PSEAE			>tr|Q9I612|Q9I612_PSEAE Probable acyl-CoA dehydrogenase OS=Pseudomonas aeruginosa (strain ATCC 15692 / PAO1 / 1C / PRS 101 / LMG 12228) GN=PA0506 PE=3 SV=1	1	2	2
	tr|Q9I659|Q9I659_PSEAE			>tr|Q9I659|Q9I659_PSEAE Probable ClpA/B protease ATP binding subunit OS=Pseudomonas aeruginosa (strain ATCC 15692 / PAO1 / 1C / PRS 101 / LMG 12228) GN=PA0459 PE=4 SV=1	1	7	7
	tr|Q9I671|Q9I671_PSEAE			>tr|Q9I671|Q9I671_PSEAE Glutaryl-CoA dehydrogenase OS=Pseudomonas aeruginosa (strain ATCC 15692 / PAO1 / 1C / PRS 101 / LMG 12228) GN=gcdH PE=3 SV=1	1	2	2
	tr|Q9I672|Q9I672_PSEAE			>tr|Q9I672|Q9I672_PSEAE Uncharacterized protein OS=Pseudomonas aeruginosa (strain ATCC 15692 / PAO1 / 1C / PRS 101 / LMG 12228) GN=PA0446 PE=4 SV=1	1	1	1
	tr|Q9I687|Q9I687_PSEAE			>tr|Q9I687|Q9I687_PSEAE Methylenetetrahydrofolate reductase OS=Pseudomonas aeruginosa (strain ATCC 15692 / PAO1 / 1C / PRS 101 / LMG 12228) GN=metF PE=3 SV=1	1	2	2
	tr|Q9I689|Q9I689_PSEAE			>tr|Q9I689|Q9I689_PSEAE ATP-dependent RNA helicase RhlE OS=Pseudomonas aeruginosa (strain ATCC 15692 / PAO1 / 1C / PRS 101 / LMG 12228) GN=rhlE PE=3 SV=1	1	2	2
	tr|Q9I6H5|Q9I6H5_PSEAE			>tr|Q9I6H5|Q9I6H5_PSEAE D-3-phosphoglycerate dehydrogenase OS=Pseudomonas aeruginosa (strain ATCC 15692 / PAO1 / 1C / PRS 101 / LMG 12228) GN=serA PE=3 SV=1	1	5	5
	tr|Q9I6J2|Q9I6J2_PSEAE			>tr|Q9I6J2|Q9I6J2_PSEAE Putrescine aminotransferase OS=Pseudomonas aeruginosa (strain ATCC 15692 / PAO1 / 1C / PRS 101 / LMG 12228) GN=spuC PE=3 SV=1	1	2	2
	tr|Q9I6Z1|Q9I6Z1_PSEAE			>tr|Q9I6Z1|Q9I6Z1_PSEAE Uncharacterized protein OS=Pseudomonas aeruginosa (strain ATCC 15692 / PAO1 / 1C / PRS 101 / LMG 12228) GN=PA0141 PE=4 SV=1	1	2	2
	tr|Q9I6Z3|Q9I6Z3_PSEAE			>tr|Q9I6Z3|Q9I6Z3_PSEAE Alkyl hydroperoxide reductase subunit C OS=Pseudomonas aeruginosa (strain ATCC 15692 / PAO1 / 1C / PRS 101 / LMG 12228) GN=ahpC PE=4 SV=1	1	5	5
	tr|Q9I748|Q9I748_PSEAE			>tr|Q9I748|Q9I748_PSEAE Uncharacterized protein OS=Pseudomonas aeruginosa (strain ATCC 15692 / PAO1 / 1C / PRS 101 / LMG 12228) GN=PA0084 PE=4 SV=1	1	3	3
	tr|Q9I762|Q9I762_PSEAE			>tr|Q9I762|Q9I762_PSEAE Uncharacterized protein OS=Pseudomonas aeruginosa (strain ATCC 15692 / PAO1 / 1C / PRS 101 / LMG 12228) GN=PA0070 PE=4 SV=1	1	2	2

## Sheet: 5-2 proteinGroups C4HSL-1 
Protein IDs	Majority protein IDs	Peptide counts (all)	Peptide counts (razor+unique)	Peptide counts (unique)	Fasta headers	Number of proteins	Peptides	Razor + unique peptides	Unique peptides	Sequence coverage [%]	Unique + razor sequence coverage [%]	Unique sequence coverage [%]	Mol. weight [kDa]	Sequence length	Sequence lengths	Q-value	Score	Intensity	MS/MS Count	Only identified by site	Reverse	Potential contaminant	id	Peptide IDs	Peptide is razor	Mod. peptide IDs	Evidence IDs	MS/MS IDs	Best MS/MS	Oxidation (M) site IDs	Oxidation (M) site positions
CON__P00761	CON__P00761	4	4	4	>P00761 SWISS-PROT:P00761|TRYP_PIG Trypsin - Sus scrofa (Pig).	1	4	4	4	25.1	25.1	25.1	24.409	231	231	0	58.529	1959300000	82			+	0	353;443;506;773	True;True;True;True	359;451;514;788	622;623;624;625;839;840;841;842;970;971;1477;1478;1479;1480;1481;1482;1483	1206;1207;1208;1209;1210;1211;1212;1213;1589;1590;1591;1592;1593;1594;1595;1596;1597;1598;1599;1600;1601;1602;1603;1604;1605;1606;1607;1608;1609;1610;1611;1612;1613;1614;1615;1616;1617;1833;1834;1835;1836;1837;1838;1839;1840;2908;2909;2910;2911;2912;2913;2914;2915;2916;2917;2918;2919;2920;2921;2922;2923;2924;2925;2926;2927;2928;2929;2930;2931;2932;2933;2934;2935;2936;2937;2938;2939;2940;2941;2942…	1209;1600;1833;2910
CON__P04264;CON__Q9R0H5;CON__Q6NXH9;CON__Q8BGZ7;CON__P50446;CON__Q6IFZ6;CON__Q7Z794;CON__Q922U2;CON__Q5XQN5;CON__ENSEMBL:ENSBTAP00000038253;CON__P35908	CON__P04264	4;1;1;1;1;1;1;1;1;1;1	4;1;1;1;1;1;1;1;1;1;1	4;1;1;1;1;1;1;1;1;1;1	>P04264 SWISS-PROT:P04264 Tax_Id=9606 Gene_Symbol=KRT1 Keratin, type II cytoskeletal 1	11	4	4	4	10.1	10.1	10.1	66.017	644	644;524;539;551;553;572;578;580;601;606;645	0	44.002	55408000	14			+	1	226;263;671;881	True;True;True;True	230;268;684;896	404;405;467;468;1297;1298;1685	830;831;832;833;834;927;928;929;930;2480;2481;2482;2483;3332	831;927;2483;3332
CON__P13645;CON__P02535-1	CON__P13645;CON__P02535-1	3;2	3;2	3;2	>P13645 SWISS-PROT:P13645 Tax_Id=9606 Gene_Symbol=KRT10 Keratin, type I cytoskeletal 10;>P02535-1 SWISS-PROT:P02535-1 Tax_Id=10090 Gene_Symbol=Krt10 Isoform 1 of Keratin, type I cytoskeletal 10	2	3	3	3	5.6	5.6	5.6	59.51	593	593;570	0	17.89	2302400	4			+	2	58;429;681	True;True;True	59;437;695	112;818;819;1317	257;1561;1562;2530	257;1562;2530
CON__Streptavidin	CON__Streptavidin	8	8	8	>Streptavidin (S.avidinii)	1	8	8	8	49.4	49.4	49.4	16.622	160	160	0	125.45	2985200000	368			+	3	372;373;580;686;879;880;907;908	True;True;True;True;True;True;True;True	378;379;593;700;894;895;922;923	655;656;657;658;659;660;661;662;663;664;665;666;667;668;669;670;671;672;673;674;675;676;677;678;679;680;681;682;683;684;685;686;687;688;689;690;691;692;693;694;695;696;697;698;699;700;701;702;703;704;705;1114;1115;1116;1117;1118;1119;1120;1121;1122;1123;1124;1125;1126;1127;1128;1129;1130;1131;1132;1133;1134;1135;1136;1137;1138;1139;1140;1141;1142;1143;1144;1145;1146;1147;1323;1324;1325;1326;1668;…	1262;1263;1264;1265;1266;1267;1268;1269;1270;1271;1272;1273;1274;1275;1276;1277;1278;1279;1280;1281;1282;1283;1284;1285;1286;1287;1288;1289;1290;1291;1292;1293;1294;1295;1296;1297;1298;1299;1300;1301;1302;1303;1304;1305;1306;1307;1308;1309;1310;1311;1312;1313;1314;1315;1316;1317;1318;1319;1320;1321;1322;1323;1324;1325;1326;1327;1328;1329;1330;1331;1332;1333;1334;1335;1336;1337;1338;1339;1340;1341…	1298;1369;2205;2553;3312;3328;3428;3432
REV__sp|P45682|NLPD_PSEAE	REV__sp|P45682|NLPD_PSEAE	1	1	1	>sp|P45682|NLPD_PSEAE Lipoprotein NlpD/LppB homolog OS=Pseudomonas aeruginosa (strain ATCC 15692 / PAO1 / 1C / PRS 101 / LMG 12228) GN=PA3623 PE=3 SV=1	1	1	1	1	0	0	0	30.835	297	297	0.01	5.5611	30043000	1		+		4	290	TRUE	295	516;517	1023;1024	1023
REV__tr|Q9HXW2|Q9HXW2_PSEAE	REV__tr|Q9HXW2|Q9HXW2_PSEAE	1	1	1	>tr|Q9HXW2|Q9HXW2_PSEAE Probable transcriptional regulator OS=Pseudomonas aeruginosa (strain ATCC 15692 / PAO1 / 1C / PRS 101 / LMG 12228) GN=PA3678 PE=4 SV=1	1	1	1	1	0	0	0	23.15	212	212	0.005102	5.6022	150420000	16		+		5	405	TRUE	413	777;778	1496;1497;1498;1499;1500;1501;1502;1503;1504;1505;1506;1507;1508;1509;1510;1511	1497
sp|G3XD23|WBPB_PSEAE	sp|G3XD23|WBPB_PSEAE	4	4	4	>sp|G3XD23|WBPB_PSEAE UDP-N-acetyl-2-amino-2-deoxy-D-glucuronate oxidase OS=Pseudomonas aeruginosa (strain ATCC 15692 / PAO1 / 1C / PRS 101 / LMG 12228) GN=wbpB PE=1 SV=1	1	4	4	4	17.1	17.1	17.1	35.717	316	316	0	29.28	69751000	12				6	3;535;587;650	True;True;True;True	3;544;600;663	5;6;1022;1023;1160;1161;1262;1263	9;10;11;12;13;14;1935;1936;2242;2243;2432;2433	11;1935;2242;2432
sp|G3XD61|WBPI_PSEAE	sp|G3XD61|WBPI_PSEAE	6	6	6	>sp|G3XD61|WBPI_PSEAE UDP-2,3-diacetamido-2,3-dideoxy-D-glucuronate 2-epimerase OS=Pseudomonas aeruginosa (strain ATCC 15692 / PAO1 / 1C / PRS 101 / LMG 12228) GN=wbpI PE=1 SV=1	1	6	6	6	27.7	27.7	27.7	38.907	354	354	0	68.039	81717000	17				7	105;389;559;662;726;816	True;True;True;True;True;True	106;397;570;675;740;831	195;196;735;1064;1065;1281;1400;1401;1559;1560	412;413;414;415;416;417;418;1412;2016;2017;2463;2790;2791;2792;3068;3069;3070;3071	415;1412;2016;2463;2790;3069
sp|G3XD94|UGND_PSEAE	sp|G3XD94|UGND_PSEAE	6	6	6	>sp|G3XD94|UGND_PSEAE UDP-N-acetyl-D-glucosamine 6-dehydrogenase OS=Pseudomonas aeruginosa (strain ATCC 15692 / PAO1 / 1C / PRS 101 / LMG 12228) GN=wbpA PE=1 SV=1	1	6	6	6	18.8	18.8	18.8	48.155	436	436	0	44.062	14872000	10				8	95;117;165;202;554;615	True;True;True;True;True;True	96;118;168;206;565;628	178;216;305;306;368;1057;1208	382;448;664;665;764;765;2005;2338;2339;2340	382;448;665;765;2005;2339
sp|O30508|ARUC_PSEAE	sp|O30508|ARUC_PSEAE	1	1	1	>sp|O30508|ARUC_PSEAE Succinylornithine transaminase/acetylornithine aminotransferase OS=Pseudomonas aeruginosa (strain ATCC 15692 / PAO1 / 1C / PRS 101 / LMG 12228) GN=aruC PE=1 SV=2	1	1	1	1	3.9	3.9	3.9	43.747	406	406	0	18.381	7752100	3				9	779	TRUE	794	1491;1492	2954;2955;2956	2956
sp|O52759|RS4_PSEAE	sp|O52759|RS4_PSEAE	3	3	3	>sp|O52759|RS4_PSEAE 30S ribosomal protein S4 OS=Pseudomonas aeruginosa (strain ATCC 15692 / PAO1 / 1C / PRS 101 / LMG 12228) GN=rpsD PE=3 SV=2	1	3	3	3	16	16	16	23.277	206	206	0	38.25	70375000	12				10	54;423;503	True;True;True	55;431;511	103;104;809;964;965	240;241;242;243;244;245;1550;1820;1821;1822;1823;1824	240;1550;1824
sp|O52760|RPOA_PSEAE	sp|O52760|RPOA_PSEAE	6	6	6	>sp|O52760|RPOA_PSEAE DNA-directed RNA polymerase subunit alpha OS=Pseudomonas aeruginosa (strain ATCC 15692 / PAO1 / 1C / PRS 101 / LMG 12228) GN=rpoA PE=3 SV=2	1	6	6	6	19.2	19.2	19.2	36.649	333	333	0	36.864	26300000	10				11	315;384;500;570;673;842	True;True;True;True;True;True	321;390;508;581;686;857	561;722;957;958;1084;1085;1300;1301;1607;1608	1112;1396;1813;1814;2037;2038;2485;2486;3161;3162	1112;1396;1813;2038;2485;3162
sp|O52762|CATA_PSEAE	sp|O52762|CATA_PSEAE	2	2	2	>sp|O52762|CATA_PSEAE Catalase OS=Pseudomonas aeruginosa (strain ATCC 15692 / PAO1 / 1C / PRS 101 / LMG 12228) GN=katA PE=1 SV=1	1	2	2	2	4.8	4.8	4.8	55.588	482	482	0	21.454	22188000	5				12	293;433	True;True	298;441	521;522;824;825	1029;1030;1031;1567;1568	1031;1568
sp|O68822|AMPA_PSEAE	sp|O68822|AMPA_PSEAE	14	14	14	>sp|O68822|AMPA_PSEAE Cytosol aminopeptidase OS=Pseudomonas aeruginosa (strain ATCC 15692 / PAO1 / 1C / PRS 101 / LMG 12228) GN=pepA PE=3 SV=1	1	14	14	14	37	37	37	52.331	495	495	0	133.06	525220000	68				13	108;109;161;191;245;277;282;398;416;467;480;512;705;790	True;True;True;True;True;True;True;True;True;True;True;True;True;True	109;110;164;195;250;282;287;406;424;475;488;520;719;805	199;200;201;202;203;298;299;350;351;440;492;501;502;759;760;797;798;902;903;923;924;925;980;981;1361;1362;1511;1512	422;423;424;425;426;427;428;429;430;431;432;647;648;649;650;733;734;735;736;894;895;973;974;996;997;998;999;1000;1001;1002;1003;1004;1467;1468;1536;1537;1723;1724;1725;1726;1727;1728;1759;1760;1761;1762;1763;1764;1765;1766;1767;1768;1769;1770;1771;1772;1855;1856;1857;2660;2661;2662;2663;2989;2990;2991;2992;2993;2994	426;432;649;735;894;973;1004;1468;1536;1724;1760;1856;2661;2994
sp|O69754|PHZF_PSEAE	sp|O69754|PHZF_PSEAE	3	3	3	>sp|O69754|PHZF_PSEAE Trans-2,3-dihydro-3-hydroxyanthranilate isomerase OS=Pseudomonas aeruginosa (strain ATCC 15692 / PAO1 / 1C / PRS 101 / LMG 12228) GN=phzF1 PE=3 SV=2	1	3	3	3	24.1	24.1	24.1	30.342	278	278	0	19.84	24957000	6				14	339;548;552	True;True;True	345;558;563	599;1045;1046;1054	1177;1984;1985;1986;1987;2002	1177;1986;2002
sp|O82850|RS2_PSEAE	sp|O82850|RS2_PSEAE	2	2	2	>sp|O82850|RS2_PSEAE 30S ribosomal protein S2 OS=Pseudomonas aeruginosa (strain ATCC 15692 / PAO1 / 1C / PRS 101 / LMG 12228) GN=rpsB PE=3 SV=2	1	2	2	2	9.8	9.8	9.8	27.336	246	246	0	16.766	32803000	5				15	731;869	True;True	745;884	1410;1411;1651;1652	2803;2804;2805;3227;3228	2805;3227
sp|O86428|ILVE_PSEAE	sp|O86428|ILVE_PSEAE	1	1	1	>sp|O86428|ILVE_PSEAE Branched-chain-amino-acid aminotransferase OS=Pseudomonas aeruginosa (strain ATCC 15692 / PAO1 / 1C / PRS 101 / LMG 12228) GN=ilvE PE=1 SV=2	1	1	1	1	3.9	3.9	3.9	34.084	307	307	0	7.1831	1815200	1				16	121	TRUE	122	222	456	456
sp|O87125|CHEB1_PSEAE	sp|O87125|CHEB1_PSEAE	1	1	1	>sp|O87125|CHEB1_PSEAE Chemotaxis response regulator protein-glutamate methylesterase of group 1 operon OS=Pseudomonas aeruginosa (strain ATCC 15692 / PAO1 / 1C / PRS 101 / LMG 12228) GN=cheB1 PE=1 SV=2	1	1	1	1	4.6	4.6	4.6	39.004	368	368	0	5.7789	242970	4				17	781	TRUE	796	1495;1496	2959;2960;2961;2962	2960
sp|P04739|FMPO_PSEAE	sp|P04739|FMPO_PSEAE	2	2	2	>sp|P04739|FMPO_PSEAE Fimbrial protein OS=Pseudomonas aeruginosa (strain ATCC 15692 / PAO1 / 1C / PRS 101 / LMG 12228) GN=pilA PE=1 SV=1	1	2	2	2	15.4	15.4	15.4	15.512	149	149	0	16.541	27694000	3				18	655;755	True;True	668;770	1271;1272;1449	2451;2452;2868	2451;2868
sp|P05384|DBHB_PSEAE	sp|P05384|DBHB_PSEAE	1	1	1	>sp|P05384|DBHB_PSEAE DNA-binding protein HU-beta OS=Pseudomonas aeruginosa (strain ATCC 15692 / PAO1 / 1C / PRS 101 / LMG 12228) GN=hupB PE=1 SV=3	1	1	1	1	15.6	15.6	15.6	9.0865	90	90	0	13.985	79072000	6				19	57	TRUE	58	109;110;111	250;251;252;253;254;255;256	255
sp|P08280|RECA_PSEAE	sp|P08280|RECA_PSEAE	1	1	1	>sp|P08280|RECA_PSEAE Protein RecA OS=Pseudomonas aeruginosa (strain ATCC 15692 / PAO1 / 1C / PRS 101 / LMG 12228) GN=recA PE=3 SV=1	1	1	1	1	5.2	5.2	5.2	36.879	346	346	0	11.52	5023500	3				20	676	TRUE	689	1306;1307	2493;2494;2495	2494
sp|P08308|OTCC_PSEAE	sp|P08308|OTCC_PSEAE	9	9	9	>sp|P08308|OTCC_PSEAE Ornithine carbamoyltransferase, catabolic OS=Pseudomonas aeruginosa (strain ATCC 15692 / PAO1 / 1C / PRS 101 / LMG 12228) GN=arcB PE=1 SV=3	1	9	9	9	26.8	26.8	26.8	38.108	336	336	0	59.723	199670000	28				21	193;215;257;355;578;593;600;618;899	True;True;True;True;True;True;True;True;True	197;219;262;361;591;606;613;631;914	354;388;389;457;628;629;1110;1111;1171;1172;1183;1184;1213;1720;1721	740;804;805;806;807;808;809;810;811;812;813;916;1218;1219;2107;2108;2109;2110;2258;2259;2280;2281;2282;2350;3386;3387;3388;3389	740;809;916;1219;2110;2258;2281;2350;3389
sp|P09591|EFTU_PSEAE	sp|P09591|EFTU_PSEAE	18	18	18	>sp|P09591|EFTU_PSEAE Elongation factor Tu OS=Pseudomonas aeruginosa (strain ATCC 15692 / PAO1 / 1C / PRS 101 / LMG 12228) GN=tufA PE=1 SV=2	1	18	18	18	50.6	50.6	50.6	43.369	397	397	0	198.77	2691600000	262				22	19;30;34;49;128;137;138;179;219;278;313;520;521;576;631;632;750;757	True;True;True;True;True;True;True;True;True;True;True;True;True;True;True;True;True;True	19;30;34;49;50;129;138;139;140;141;182;223;283;319;528;529;530;588;589;644;645;765;772	35;36;37;38;56;57;63;64;89;90;91;92;93;94;95;236;237;251;252;253;254;255;256;257;258;259;260;261;262;327;396;493;494;495;496;554;555;556;557;558;992;993;994;995;996;997;1097;1098;1099;1100;1101;1102;1103;1104;1105;1106;1107;1108;1232;1233;1234;1441;1442;1452;1453	84;85;86;87;88;89;115;116;122;123;124;125;126;127;128;129;130;131;132;133;134;135;136;137;138;139;140;141;189;190;191;192;193;194;195;196;197;198;199;200;201;202;203;204;205;206;207;208;209;210;211;212;213;214;215;216;217;218;219;220;221;222;223;224;225;226;227;492;493;524;525;526;527;528;529;530;531;532;533;534;535;536;537;538;539;540;541;542;543;544;545;546;547;548;549;550;551;552;553;554;555;5…	89;115;133;199;492;538;560;700;821;982;1087;1879;1885;2089;2380;2387;2853;2871	0;1;2;3;4;5	140;152;177;216;362;372
sp|P11221|OPRI_PSEAE	sp|P11221|OPRI_PSEAE	2	2	2	>sp|P11221|OPRI_PSEAE Major outer membrane lipoprotein OS=Pseudomonas aeruginosa (strain ATCC 15692 / PAO1 / 1C / PRS 101 / LMG 12228) GN=oprI PE=3 SV=1	1	2	2	2	25.3	25.3	25.3	8.8348	83	83	0	19.122	11080000	12				23	394;511	True;True	402;519	744;745;978;979	1429;1430;1431;1432;1847;1848;1849;1850;1851;1852;1853;1854	1430;1848
sp|P13794|PORF_PSEAE	sp|P13794|PORF_PSEAE	5	5	5	>sp|P13794|PORF_PSEAE Outer membrane porin F OS=Pseudomonas aeruginosa (strain ATCC 15692 / PAO1 / 1C / PRS 101 / LMG 12228) GN=oprF PE=1 SV=1	1	5	5	5	19.7	19.7	19.7	37.639	350	350	0	40.647	49249000	17				24	151;634;643;776;820	True;True;True;True;True	154;647;656;791;835	279;280;1237;1238;1250;1486;1487;1567;1568	612;613;614;615;616;2393;2394;2395;2413;2947;2948;2949;2950;3079;3080;3081;3082;3083	615;2395;2413;2947;3079
sp|P13981|ARCA_PSEAE	sp|P13981|ARCA_PSEAE	21	21	21	>sp|P13981|ARCA_PSEAE Arginine deiminase OS=Pseudomonas aeruginosa (strain ATCC 15692 / PAO1 / 1C / PRS 101 / LMG 12228) GN=arcA PE=1 SV=2	1	21	21	21	52.2	52.2	52.2	46.435	418	418	0	261.03	2628000000	223				25	44;132;142;183;204;213;273;381;395;396;397;411;608;613;619;641;696;717;718;798;851	True;True;True;True;True;True;True;True;True;True;True;True;True;True;True;True;True;True;True;True;True	44;133;145;186;187;208;217;278;387;403;404;405;419;621;626;632;654;710;731;732;813;866	81;82;243;266;267;334;335;336;337;371;372;383;384;385;484;485;486;487;717;718;746;747;748;749;750;751;752;753;754;755;756;757;758;786;787;1197;1198;1205;1206;1214;1215;1245;1246;1247;1344;1345;1383;1384;1385;1386;1387;1388;1389;1526;1622	174;175;176;177;178;179;180;504;505;506;507;508;509;588;589;590;591;592;593;594;709;710;711;712;713;714;715;768;769;770;771;786;787;788;789;790;791;792;793;794;795;796;797;798;799;800;955;956;957;958;959;960;961;962;963;964;965;966;967;968;1386;1387;1388;1389;1390;1391;1392;1433;1434;1435;1436;1437;1438;1439;1440;1441;1442;1443;1444;1445;1446;1447;1448;1449;1450;1451;1452;1453;1454;1455;1456;1457…	178;505;589;710;771;793;960;1387;1434;1447;1466;1523;2312;2327;2351;2410;2604;2705;2744;3018;3182	6	316
sp|P13982|ARCC_PSEAE	sp|P13982|ARCC_PSEAE	2	2	2	>sp|P13982|ARCC_PSEAE Carbamate kinase OS=Pseudomonas aeruginosa (strain ATCC 15692 / PAO1 / 1C / PRS 101 / LMG 12228) GN=arcC PE=3 SV=1	1	2	2	2	9.4	9.4	9.4	33.08	310	310	0	19.707	3798900	2				26	48;124	True;True	48;125	88;227	188;462	188;462
sp|P14165|CISY_PSEAE	sp|P14165|CISY_PSEAE	5	5	5	>sp|P14165|CISY_PSEAE Citrate synthase OS=Pseudomonas aeruginosa (strain ATCC 15692 / PAO1 / 1C / PRS 101 / LMG 12228) GN=gltA PE=3 SV=2	1	5	5	5	16.1	16.1	16.1	47.694	428	428	0	35.117	18603000	11				27	50;312;556;568;599	True;True;True;True;True	51;318;567;579;612	96;97;553;1060;1081;1082;1182	228;229;230;231;232;1085;2009;2034;2035;2278;2279	229;1085;2009;2034;2278
sp|P29365|DHOM_PSEAE	sp|P29365|DHOM_PSEAE	1	1	1	>sp|P29365|DHOM_PSEAE Homoserine dehydrogenase OS=Pseudomonas aeruginosa (strain ATCC 15692 / PAO1 / 1C / PRS 101 / LMG 12228) GN=hom PE=3 SV=2	1	1	1	1	3.5	3.5	3.5	46.223	434	434	0	6.1788	1901100	0				28	514	TRUE	522	983	1859	1859
sp|P30718|CH60_PSEAE	sp|P30718|CH60_PSEAE	9	9	9	>sp|P30718|CH60_PSEAE 60 kDa chaperonin OS=Pseudomonas aeruginosa (strain ATCC 15692 / PAO1 / 1C / PRS 101 / LMG 12228) GN=groL PE=1 SV=3	1	9	9	9	30	30	30	57.085	547	547	0	77.127	124770000	33				29	9;41;79;81;200;563;621;622;780	True;True;True;True;True;True;True;True;True	9;41;80;82;204;574;634;635;795	16;17;75;76;148;149;151;152;153;154;365;1071;1072;1217;1218;1219;1493;1494	44;45;46;47;48;161;162;163;164;165;166;167;323;324;325;327;328;329;330;331;332;333;334;335;336;760;2023;2024;2358;2359;2360;2957;2958	44;161;325;328;760;2024;2358;2360;2957
sp|P37798|ACCC_PSEAE	sp|P37798|ACCC_PSEAE	8	8	8	>sp|P37798|ACCC_PSEAE Biotin carboxylase OS=Pseudomonas aeruginosa (strain ATCC 15692 / PAO1 / 1C / PRS 101 / LMG 12228) GN=accC PE=1 SV=1	1	8	8	8	27.2	27.2	27.2	48.887	449	449	0	67.744	101880000	21				30	45;581;661;710;794;797;833;861	True;True;True;True;True;True;True;True	45;594;674;724;809;812;848;876	83;1148;1149;1279;1280;1371;1372;1518;1519;1524;1525;1594;1635;1636	181;2226;2227;2460;2461;2462;2688;2689;3008;3009;3010;3015;3016;3017;3130;3131;3201;3202;3203;3204;3205	181;2226;2462;2688;3008;3017;3131;3201
sp|P37799|BCCP_PSEAE	sp|P37799|BCCP_PSEAE	8	8	8	>sp|P37799|BCCP_PSEAE Biotin carboxyl carrier protein of acetyl-CoA carboxylase OS=Pseudomonas aeruginosa (strain ATCC 15692 / PAO1 / 1C / PRS 101 / LMG 12228) GN=accB PE=3 SV=1	1	8	8	8	62.2	62.2	62.2	16.455	156	156	0	128.57	2014900000	132				31	8;400;401;460;461;488;678;699	True;True;True;True;True;True;True;True	8;408;409;468;469;496;691;692;713	14;15;764;765;766;767;768;769;770;771;772;879;880;881;882;883;884;885;886;887;888;889;890;891;892;893;939;1310;1311;1312;1313;1348;1349;1350;1351;1352;1353	28;29;30;31;32;33;34;35;36;37;38;39;40;41;42;43;1472;1473;1474;1475;1476;1477;1478;1479;1480;1481;1482;1483;1484;1485;1486;1487;1488;1489;1490;1491;1680;1681;1682;1683;1684;1685;1686;1687;1688;1689;1690;1691;1692;1693;1694;1695;1696;1697;1698;1699;1700;1701;1702;1703;1704;1705;1706;1707;1708;1709;1710;1711;1712;1790;2500;2501;2502;2503;2504;2505;2506;2507;2508;2509;2510;2511;2512;2513;2514;2515;2…	36;1481;1491;1698;1709;1790;2508;2637	7	87
sp|P38100|CARB_PSEAE	sp|P38100|CARB_PSEAE	6	6	6	>sp|P38100|CARB_PSEAE Carbamoyl-phosphate synthase large chain OS=Pseudomonas aeruginosa (strain ATCC 15692 / PAO1 / 1C / PRS 101 / LMG 12228) GN=carB PE=3 SV=3	1	6	6	6	9.4	9.4	9.4	117.33	1073	1073	0	61.77	38739000	14				32	164;419;490;532;629;736	True;True;True;True;True;True	167;427;498;541;642;750	303;304;803;804;941;1017;1230;1420	656;657;658;659;660;661;662;663;1543;1544;1545;1793;1921;2376;2822	657;1545;1793;1921;2376;2822
sp|P43336|PHHC_PSEAE	sp|P43336|PHHC_PSEAE	4	4	4	>sp|P43336|PHHC_PSEAE Aromatic-amino-acid aminotransferase OS=Pseudomonas aeruginosa (strain ATCC 15692 / PAO1 / 1C / PRS 101 / LMG 12228) GN=phhC PE=3 SV=2	1	4	4	4	15	15	15	43.273	399	399	0	32.576	45610000	11				33	12;344;410;826	True;True;True;True	12;350;418;841	22;23;608;784;785;1581;1582	54;55;56;1188;1518;1519;1520;3108;3109;3110;3111	56;1188;1520;3108
sp|P47203|FTSA_PSEAE	sp|P47203|FTSA_PSEAE	2	2	2	>sp|P47203|FTSA_PSEAE Cell division protein FtsA OS=Pseudomonas aeruginosa (strain ATCC 15692 / PAO1 / 1C / PRS 101 / LMG 12228) GN=ftsA PE=3 SV=2	1	2	2	2	6	6	6	44.646	417	417	0	13.17	3199000	3				34	740;804	True;True	754;819	1425;1538	2832;3042;3043	2832;3042
sp|P47204|FTSZ_PSEAE	sp|P47204|FTSZ_PSEAE	2	2	2	>sp|P47204|FTSZ_PSEAE Cell division protein FtsZ OS=Pseudomonas aeruginosa (strain ATCC 15692 / PAO1 / 1C / PRS 101 / LMG 12228) GN=ftsZ PE=1 SV=2	1	2	2	2	7.9	7.9	7.9	41.218	394	394	0	23.312	4606200	6				35	283;848	True;True	288;863	503;504;1617;1618;1619	1005;1006;3173;3174;3175;3176	1005;3173
sp|P48247|GSA_PSEAE	sp|P48247|GSA_PSEAE	3	3	3	>sp|P48247|GSA_PSEAE Glutamate-1-semialdehyde 2,1-aminomutase OS=Pseudomonas aeruginosa (strain ATCC 15692 / PAO1 / 1C / PRS 101 / LMG 12228) GN=hemL PE=1 SV=2	1	3	3	3	13.3	13.3	13.3	45.397	427	427	0	37.163	25498000	8				36	42;575;768	True;True;True	42;587;783	77;78;1095;1096;1468	168;169;170;171;2055;2056;2057;2893	171;2055;2893
sp|P50987|ARLY_PSEAE	sp|P50987|ARLY_PSEAE	1	1	1	>sp|P50987|ARLY_PSEAE Argininosuccinate lyase OS=Pseudomonas aeruginosa (strain ATCC 15692 / PAO1 / 1C / PRS 101 / LMG 12228) GN=argH PE=3 SV=2	1	1	1	1	2.8	2.8	2.8	51.64	464	464	0	10.635	7616200	2				37	778	TRUE	793	1489;1490	2952;2953	2952
sp|P53593|SUCC_PSEAE	sp|P53593|SUCC_PSEAE	17	17	17	>sp|P53593|SUCC_PSEAE Succinyl-CoA ligase [ADP-forming] subunit beta OS=Pseudomonas aeruginosa (strain ATCC 15692 / PAO1 / 1C / PRS 101 / LMG 12228) GN=sucC PE=3 SV=2	1	17	17	17	49.2	49.2	49.2	41.542	388	388	0	178.71	548890000	70				38	28;100;114;186;341;350;369;370;428;434;435;565;598;610;620;625;802	True;True;True;True;True;True;True;True;True;True;True;True;True;True;True;True;True	28;101;115;190;347;356;375;376;436;442;443;576;611;623;633;638;817	53;54;186;187;211;212;342;602;603;617;618;650;651;652;816;817;826;827;828;829;1075;1076;1180;1181;1200;1201;1216;1222;1223;1532;1533;1534;1535	109;110;111;112;113;393;394;395;396;397;398;399;400;401;443;444;721;1180;1181;1199;1200;1252;1253;1254;1255;1256;1257;1258;1559;1560;1569;1570;1571;1572;1573;1574;1575;1576;1577;2028;2029;2268;2269;2270;2271;2272;2273;2274;2275;2276;2277;2320;2321;2357;2365;2366;2367;2368;2369;3026;3027;3028;3029;3030;3031;3032;3033;3034;3035;3036;3037;3038	110;399;444;721;1180;1200;1252;1257;1559;1572;1574;2029;2274;2321;2357;2368;3033
sp|P53641|SODF_PSEAE	sp|P53641|SODF_PSEAE	1	1	1	>sp|P53641|SODF_PSEAE Superoxide dismutase [Fe] OS=Pseudomonas aeruginosa (strain ATCC 15692 / PAO1 / 1C / PRS 101 / LMG 12228) GN=sodB PE=3 SV=3	1	1	1	1	7.8	7.8	7.8	21.351	193	193	0	6.693	1752900	1				39	748	TRUE	763	1438	2849	2849
sp|P57112|STHA_PSEAE	sp|P57112|STHA_PSEAE	2	2	2	>sp|P57112|STHA_PSEAE Soluble pyridine nucleotide transhydrogenase OS=Pseudomonas aeruginosa (strain ATCC 15692 / PAO1 / 1C / PRS 101 / LMG 12228) GN=sthA PE=1 SV=2	1	2	2	2	5	5	5	51.16	464	464	0	12.097	2517600	2				40	294;644	True;True	299;657	523;1251	1032;2414	1032;2414
sp|P72173|AAT_PSEAE	sp|P72173|AAT_PSEAE	8	8	8	>sp|P72173|AAT_PSEAE Aspartate aminotransferase OS=Pseudomonas aeruginosa (strain ATCC 15692 / PAO1 / 1C / PRS 101 / LMG 12228) GN=aspC PE=3 SV=2	1	8	8	8	28.1	28.1	28.1	43.319	398	398	0	69.002	69824000	16				41	39;61;311;471;476;782;859;910	True;True;True;True;True;True;True;True	39;62;317;479;484;797;874;925	71;72;117;118;552;911;912;918;1497;1498;1632;1633;1737;1738	151;152;263;264;1084;1738;1739;1740;1749;1750;2963;2964;3198;3199;3434;3435	152;264;1084;1740;1749;2964;3199;3434
sp|P77915|HEMN_PSEAE	sp|P77915|HEMN_PSEAE	3	3	3	>sp|P77915|HEMN_PSEAE Oxygen-independent coproporphyrinogen-III oxidase OS=Pseudomonas aeruginosa (strain ATCC 15692 / PAO1 / 1C / PRS 101 / LMG 12228) GN=hemN PE=2 SV=2	1	3	3	3	7.8	7.8	7.8	52.488	460	460	0	18.352	13813000	4				42	366;508;670	True;True;True	372;516;683	647;974;1295;1296	1248;1843;2478;2479	1248;1843;2479
sp|Q51342|PUR1_PSEAE	sp|Q51342|PUR1_PSEAE	4	4	4	>sp|Q51342|PUR1_PSEAE Amidophosphoribosyltransferase OS=Pseudomonas aeruginosa (strain ATCC 15692 / PAO1 / 1C / PRS 101 / LMG 12228) GN=purF PE=3 SV=3	1	4	4	4	12.2	12.2	12.2	55.369	501	501	0	29.755	37961000	7				43	145;319;677;698	True;True;True;True	148;325;690;712	271;567;1308;1309;1347	601;1119;2496;2497;2498;2499;2611	601;1119;2497;2611
sp|Q51390|GLPK2_PSEAE	sp|Q51390|GLPK2_PSEAE	1	1	1	>sp|Q51390|GLPK2_PSEAE Glycerol kinase 2 OS=Pseudomonas aeruginosa (strain ATCC 15692 / PAO1 / 1C / PRS 101 / LMG 12228) GN=glpK2 PE=3 SV=2	1	1	1	1	3	3	3	55.966	505	505	0	6.5749	1971700	1				44	209	TRUE	213	378	781	781
sp|Q51422|SYDND_PSEAE	sp|Q51422|SYDND_PSEAE	4	4	4	>sp|Q51422|SYDND_PSEAE Aspartate--tRNA(Asp/Asn) ligase OS=Pseudomonas aeruginosa (strain ATCC 15692 / PAO1 / 1C / PRS 101 / LMG 12228) GN=aspS PE=1 SV=2	1	4	4	4	10.7	10.7	10.7	66.207	591	591	0	49.095	26752000	7				45	120;375;745;783	True;True;True;True	121;381;759;760;798	221;708;709;1431;1432;1433;1499	455;1374;1375;2841;2842;2843;2965	455;1374;2843;2965	8	565
sp|Q51561|RPOB_PSEAE	sp|Q51561|RPOB_PSEAE	28	28	28	>sp|Q51561|RPOB_PSEAE DNA-directed RNA polymerase subunit beta OS=Pseudomonas aeruginosa (strain ATCC 15692 / PAO1 / 1C / PRS 101 / LMG 12228) GN=rpoB PE=3 SV=2	1	28	28	28	31.6	31.6	31.6	150.84	1357	1357	0	227.72	481600000	81				46	46;63;84;155;171;253;266;267;298;306;308;327;388;408;493;502;505;539;544;566;633;685;691;712;721;837;878;884	True;True;True;True;True;True;True;True;True;True;True;True;True;True;True;True;True;True;True;True;True;True;True;True;True;True;True;True	46;64;85;158;174;258;271;272;304;312;314;333;396;416;501;510;513;549;554;577;646;699;705;726;735;852;893;899	84;85;120;121;160;161;286;315;450;451;472;473;474;531;544;547;548;578;579;733;734;781;782;946;961;962;963;968;969;1031;1032;1038;1039;1077;1078;1235;1236;1321;1322;1335;1336;1374;1375;1392;1393;1601;1667;1689	182;183;184;266;267;268;269;270;271;272;273;274;275;345;346;347;348;349;624;625;674;675;676;908;909;935;936;937;938;939;1049;1074;1078;1079;1080;1132;1133;1134;1410;1411;1514;1515;1516;1800;1817;1818;1819;1829;1830;1831;1832;1964;1965;1966;1967;1974;1975;1976;2030;2031;2388;2389;2390;2391;2392;2534;2535;2536;2537;2538;2539;2540;2592;2593;2594;2691;2692;2781;2782;2783;3154;3245;3342;3343	182;270;347;624;674;908;935;936;1049;1074;1080;1133;1410;1515;1800;1818;1832;1967;1976;2031;2389;2534;2594;2692;2783;3154;3245;3343
sp|Q51567|SUCD_PSEAE	sp|Q51567|SUCD_PSEAE	5	5	5	>sp|Q51567|SUCD_PSEAE Succinyl-CoA ligase [ADP-forming] subunit alpha OS=Pseudomonas aeruginosa (strain ATCC 15692 / PAO1 / 1C / PRS 101 / LMG 12228) GN=sucD PE=3 SV=2	1	5	5	5	25.8	25.8	25.8	30.266	295	295	0	32.761	42667000	9				47	56;214;265;436;664	True;True;True;True;True	57;218;270;444;677	107;108;386;387;471;830;1284;1285	248;249;801;802;803;934;1578;2466;2467	248;801;934;1578;2467
sp|Q59637|ODP1_PSEAE	sp|Q59637|ODP1_PSEAE	13	13	13	>sp|Q59637|ODP1_PSEAE Pyruvate dehydrogenase E1 component OS=Pseudomonas aeruginosa (strain ATCC 15692 / PAO1 / 1C / PRS 101 / LMG 12228) GN=aceE PE=3 SV=2	1	13	13	13	17.6	17.6	17.6	99.563	882	882	0	97.39	179920000	34				48	148;182;239;320;352;378;390;542;567;584;665;675;808	True;True;True;True;True;True;True;True;True;True;True;True;True	151;185;244;326;358;384;398;552;578;597;678;688;823	276;332;333;432;433;568;620;621;712;713;736;737;1035;1079;1080;1154;1155;1286;1287;1304;1305;1544;1545	609;707;708;884;885;886;887;1120;1202;1203;1204;1205;1378;1379;1380;1381;1382;1413;1414;1415;1971;2032;2033;2234;2235;2236;2468;2469;2489;2490;2491;2492;3050;3051	609;708;884;1120;1204;1378;1413;1971;2033;2236;2468;2492;3050
sp|Q59638|ODP2_PSEAE	sp|Q59638|ODP2_PSEAE	6	6	6	>sp|Q59638|ODP2_PSEAE Dihydrolipoyllysine-residue acetyltransferase component of pyruvate dehydrogenase complex OS=Pseudomonas aeruginosa (strain ATCC 15692 / PAO1 / 1C / PRS 101 / LMG 12228) GN=aceF PE=2 SV=2	1	6	6	6	11.9	11.9	11.9	56.708	547	547	0	37.516	28735000	11				49	103;195;222;445;482;516	True;True;True;True;True;True	104;199;226;453;490;524	193;356;357;400;844;845;928;929;985	409;742;743;744;825;1619;1620;1621;1776;1777;1862	409;744;825;1621;1776;1862
sp|Q9HT14|ATP6_PSEAE	sp|Q9HT14|ATP6_PSEAE	1	1	1	>sp|Q9HT14|ATP6_PSEAE ATP synthase subunit a OS=Pseudomonas aeruginosa (strain ATCC 15692 / PAO1 / 1C / PRS 101 / LMG 12228) GN=atpB PE=3 SV=1	1	1	1	1	5.5	5.5	5.5	31.92	289	289	0	5.7078	2588900	1				50	496	TRUE	504	951	1806	1806
sp|Q9HT16|ATPF_PSEAE	sp|Q9HT16|ATPF_PSEAE	1	1	1	>sp|Q9HT16|ATPF_PSEAE ATP synthase subunit b OS=Pseudomonas aeruginosa (strain ATCC 15692 / PAO1 / 1C / PRS 101 / LMG 12228) GN=atpF PE=3 SV=1	1	1	1	1	7.1	7.1	7.1	16.956	156	156	0	6.5646	997090	1				51	89	TRUE	90	169	364	364
sp|Q9HT18|ATPA_PSEAE	sp|Q9HT18|ATPA_PSEAE	12	12	12	>sp|Q9HT18|ATPA_PSEAE ATP synthase subunit alpha OS=Pseudomonas aeruginosa (strain ATCC 15692 / PAO1 / 1C / PRS 101 / LMG 12228) GN=atpA PE=3 SV=1	1	12	12	12	27.4	27.4	27.4	55.393	514	514	0	89.498	162940000	32				52	163;185;258;358;585;689;690;702;772;791;846;847	True;True;True;True;True;True;True;True;True;True;True;True	166;189;263;364;598;703;704;716;787;806;861;862	302;341;458;459;633;634;1156;1157;1331;1332;1333;1334;1357;1358;1475;1476;1513;1514;1615;1616	654;655;720;917;918;1223;1224;2237;2238;2239;2584;2585;2586;2587;2588;2589;2590;2591;2654;2655;2656;2906;2907;2995;2996;2997;2998;2999;3000;3170;3171;3172	655;720;918;1224;2237;2587;2590;2654;2906;2995;3170;3171
sp|Q9HT19|ATPG_PSEAE	sp|Q9HT19|ATPG_PSEAE	1	1	1	>sp|Q9HT19|ATPG_PSEAE ATP synthase gamma chain OS=Pseudomonas aeruginosa (strain ATCC 15692 / PAO1 / 1C / PRS 101 / LMG 12228) GN=atpG PE=3 SV=1	1	1	1	1	6.6	6.6	6.6	31.553	286	286	0	14.527	10656000	4				53	583	TRUE	596	1152;1153	2230;2231;2232;2233	2233
sp|Q9HT20|ATPB_PSEAE	sp|Q9HT20|ATPB_PSEAE	9	9	9	>sp|Q9HT20|ATPB_PSEAE ATP synthase subunit beta OS=Pseudomonas aeruginosa (strain ATCC 15692 / PAO1 / 1C / PRS 101 / LMG 12228) GN=atpD PE=3 SV=1	1	9	9	9	27.3	27.3	27.3	49.499	458	458	0	77.697	42776000	13				54	135;150;230;304;623;770;771;786;906	True;True;True;True;True;True;True;True;True	136;153;234;310;636;785;786;801;921	246;278;410;541;1220;1471;1472;1473;1474;1504;1731	512;611;845;1070;2361;2362;2901;2902;2903;2904;2905;2978;3403	512;611;845;1070;2361;2901;2903;2978;3403
sp|Q9HT95|ATSE4_PSEAE	sp|Q9HT95|ATSE4_PSEAE	2	2	2	>sp|Q9HT95|ATSE4_PSEAE Acetyltransferase PA5475 OS=Pseudomonas aeruginosa (strain ATCC 15692 / PAO1 / 1C / PRS 101 / LMG 12228) GN=PA5475 PE=3 SV=1	1	2	2	2	11.8	11.8	11.8	21	186	186	0	13.617	3689300	3				55	144;627	True;True	147;640	270;1226;1227	600;2372;2373	600;2372
sp|Q9HTD7|ASPA_PSEAE	sp|Q9HTD7|ASPA_PSEAE	2	2	2	>sp|Q9HTD7|ASPA_PSEAE Aspartate ammonia-lyase OS=Pseudomonas aeruginosa (strain ATCC 15692 / PAO1 / 1C / PRS 101 / LMG 12228) GN=aspA PE=3 SV=1	1	2	2	2	12.2	12.2	12.2	51.069	474	474	0	11.86	3234400	2				56	406;453	True;True	414;461	779;870	1512;1670	1512;1670
sp|Q9HTF1|LTAE_PSEAE	sp|Q9HTF1|LTAE_PSEAE	1	1	1	>sp|Q9HTF1|LTAE_PSEAE Low specificity L-threonine aldolase OS=Pseudomonas aeruginosa (strain ATCC 15692 / PAO1 / 1C / PRS 101 / LMG 12228) GN=ltaE PE=3 SV=1	1	1	1	1	4.9	4.9	4.9	38.213	346	346	0	14.441	2141300	2				57	225	TRUE	229	403	828;829	829
sp|Q9HTN8|RL28_PSEAE	sp|Q9HTN8|RL28_PSEAE	1	1	1	>sp|Q9HTN8|RL28_PSEAE 50S ribosomal protein L28 OS=Pseudomonas aeruginosa (strain ATCC 15692 / PAO1 / 1C / PRS 101 / LMG 12228) GN=rpmB PE=3 SV=1	1	1	1	1	12.8	12.8	12.8	9.0655	78	78	0	7.4421	14351000	2				58	274	TRUE	279	488;489	969;970	970
sp|Q9HTQ0|DADA1_PSEAE	sp|Q9HTQ0|DADA1_PSEAE	7	7	7	>sp|Q9HTQ0|DADA1_PSEAE D-amino acid dehydrogenase 1 OS=Pseudomonas aeruginosa (strain ATCC 15692 / PAO1 / 1C / PRS 101 / LMG 12228) GN=dadA1 PE=1 SV=1	1	7	7	7	20.6	20.6	20.6	47.139	432	432	0	55.685	45158000	15				59	25;515;666;730;742;815;897	True;True;True;True;True;True;True	25;523;679;744;756;830;912	49;984;1288;1289;1408;1409;1427;1557;1558;1716;1717	103;1860;1861;2470;2471;2800;2801;2802;2834;2835;3065;3066;3067;3380;3381	103;1860;2471;2800;2834;3067;3380
sp|Q9HTV1|RHO_PSEAE	sp|Q9HTV1|RHO_PSEAE	3	3	3	>sp|Q9HTV1|RHO_PSEAE Transcription termination factor Rho OS=Pseudomonas aeruginosa (strain ATCC 15692 / PAO1 / 1C / PRS 101 / LMG 12228) GN=rho PE=3 SV=1	1	3	3	3	9.8	9.8	9.8	47.069	419	419	0	26.854	19719000	5				60	359;545;725	True;True;True	365;555;739	635;1040;1041;1398;1399	1225;1977;1978;1979;1980;2788;2789	1225;1980;2789
sp|Q9HU21|RMLC_PSEAE	sp|Q9HU21|RMLC_PSEAE	1	1	1	>sp|Q9HU21|RMLC_PSEAE dTDP-4-dehydrorhamnose 3,5-epimerase OS=Pseudomonas aeruginosa (strain ATCC 15692 / PAO1 / 1C / PRS 101 / LMG 12228) GN=rmlC PE=1 SV=1	1	1	1	1	6.6	6.6	6.6	20.766	181	181	0	6.5681	7487300	1				61	412	TRUE	420	788	1526	1526
sp|Q9HU65|GLNA_PSEAE	sp|Q9HU65|GLNA_PSEAE	7	7	7	>sp|Q9HU65|GLNA_PSEAE Glutamine synthetase OS=Pseudomonas aeruginosa (strain ATCC 15692 / PAO1 / 1C / PRS 101 / LMG 12228) GN=glnA PE=1 SV=1	1	7	7	7	26.2	26.2	26.2	51.944	469	469	0	68.859	84620000	41				62	69;236;377;528;546;607;684	True;True;True;True;True;True;True	70;240;241;383;537;556;620;698	130;131;421;422;423;424;425;426;427;711;1009;1010;1042;1193;1194;1195;1196;1320	292;293;859;860;861;862;863;864;865;866;867;868;869;870;871;872;873;874;875;876;877;1377;1906;1907;1908;1909;1981;2298;2299;2300;2301;2302;2303;2304;2305;2306;2307;2308;2309;2310;2533	292;860;1377;1907;1981;2299;2533	9	377
sp|Q9HUM0|HFQ_PSEAE	sp|Q9HUM0|HFQ_PSEAE	1	1	1	>sp|Q9HUM0|HFQ_PSEAE RNA-binding protein Hfq OS=Pseudomonas aeruginosa (strain ATCC 15692 / PAO1 / 1C / PRS 101 / LMG 12228) GN=hfq PE=1 SV=1	1	1	1	1	15.9	15.9	15.9	9.1034	82	82	0	6.0012	1485500	2				63	497	TRUE	505	952;953	1807;1808	1808
sp|Q9HUV8|PUR2_PSEAE	sp|Q9HUV8|PUR2_PSEAE	1	1	1	>sp|Q9HUV8|PUR2_PSEAE Phosphoribosylamine--glycine ligase OS=Pseudomonas aeruginosa (strain ATCC 15692 / PAO1 / 1C / PRS 101 / LMG 12228) GN=purD PE=3 SV=1	1	1	1	1	3.5	3.5	3.5	45.212	429	429	0	8.4137	777380	1				64	432	TRUE	440	823	1566	1566
sp|Q9HV43|DNAK_PSEAE	sp|Q9HV43|DNAK_PSEAE	2	2	2	>sp|Q9HV43|DNAK_PSEAE Chaperone protein DnaK OS=Pseudomonas aeruginosa (strain ATCC 15692 / PAO1 / 1C / PRS 101 / LMG 12228) GN=dnaK PE=3 SV=1	1	2	2	2	6.4	6.4	6.4	68.402	637	637	0	14.594	11461000	4				65	577;752	True;True	590;767	1109;1445;1446	2106;2863;2864;2865	2106;2864
sp|Q9HV50|GLMM_PSEAE	sp|Q9HV50|GLMM_PSEAE	3	3	3	>sp|Q9HV50|GLMM_PSEAE Phosphoglucosamine mutase OS=Pseudomonas aeruginosa (strain ATCC 15692 / PAO1 / 1C / PRS 101 / LMG 12228) GN=glmM PE=3 SV=1	1	3	3	3	11.2	11.2	11.2	47.796	445	445	0	17.668	11015000	6				66	499;785;909	True;True;True	507;800;924	956;1502;1503;1736	1812;2974;2975;2976;2977;3433	1812;2974;3433
sp|Q9HV59|PNP_PSEAE	sp|Q9HV59|PNP_PSEAE	6	6	6	>sp|Q9HV59|PNP_PSEAE Polyribonucleotide nucleotidyltransferase OS=Pseudomonas aeruginosa (strain ATCC 15692 / PAO1 / 1C / PRS 101 / LMG 12228) GN=pnp PE=3 SV=1	1	6	6	6	11.4	11.4	11.4	75.452	701	701	0	51.313	40277000	14				67	23;83;149;368;489;814	True;True;True;True;True;True	23;84;152;374;497;829	45;46;158;159;277;649;940;1555;1556	99;100;340;341;342;343;344;610;1250;1251;1791;1792;3063;3064	99;341;610;1251;1791;3064
sp|Q9HVA2|ILVC_PSEAE	sp|Q9HVA2|ILVC_PSEAE	2	2	2	>sp|Q9HVA2|ILVC_PSEAE Ketol-acid reductoisomerase OS=Pseudomonas aeruginosa (strain ATCC 15692 / PAO1 / 1C / PRS 101 / LMG 12228) GN=ilvC PE=1 SV=1	1	2	2	2	8.9	8.9	8.9	36.424	338	338	0	17.557	28472000	4				68	16;264	True;True	16;269	28;469;470	62;931;932;933	62;933
sp|Q9HVC5|KPRS_PSEAE	sp|Q9HVC5|KPRS_PSEAE	2	2	2	>sp|Q9HVC5|KPRS_PSEAE Ribose-phosphate pyrophosphokinase OS=Pseudomonas aeruginosa (strain ATCC 15692 / PAO1 / 1C / PRS 101 / LMG 12228) GN=prs PE=3 SV=1	1	2	2	2	8.3	8.3	8.3	34.04	313	313	0	14.337	8791500	4				69	382;564	True;True	388;575	719;1073;1074	1393;2025;2026;2027	1393;2027
sp|Q9HVF1|MQO2_PSEAE	sp|Q9HVF1|MQO2_PSEAE	2	2	2	>sp|Q9HVF1|MQO2_PSEAE Probable malate:quinone oxidoreductase 2 OS=Pseudomonas aeruginosa (strain ATCC 15692 / PAO1 / 1C / PRS 101 / LMG 12228) GN=mqo2 PE=3 SV=1	1	2	2	2	5.1	5.1	5.1	55.498	507	507	0	17	13550000	5				70	716;898	True;True	730;913	1382;1718;1719	2703;3382;3383;3384;3385	2703;3384
sp|Q9HVI7|GLYA3_PSEAE	sp|Q9HVI7|GLYA3_PSEAE	1	1	1	>sp|Q9HVI7|GLYA3_PSEAE Serine hydroxymethyltransferase 3 OS=Pseudomonas aeruginosa (strain ATCC 15692 / PAO1 / 1C / PRS 101 / LMG 12228) GN=glyA2 PE=3 SV=1	1	1	1	1	4.8	4.8	4.8	45.157	417	417	0	6.5032	4969500	1				71	255	TRUE	260	454	912	912
sp|Q9HVM4|SYI_PSEAE	sp|Q9HVM4|SYI_PSEAE	7	7	7	>sp|Q9HVM4|SYI_PSEAE Isoleucine--tRNA ligase OS=Pseudomonas aeruginosa (strain ATCC 15692 / PAO1 / 1C / PRS 101 / LMG 12228) GN=ileS PE=3 SV=1	1	7	7	7	10	10	10	105.46	943	943	0	58.517	50447000	12				72	102;212;248;457;672;733;868	True;True;True;True;True;True;True	103;216;253;465;685;747;883	192;381;382;444;875;876;1299;1413;1649;1650	408;784;785;902;1676;1677;2484;2807;3223;3224;3225;3226	408;785;902;1677;2484;2807;3223
sp|Q9HVN5|CLPB_PSEAE	sp|Q9HVN5|CLPB_PSEAE	2	1	1	>sp|Q9HVN5|CLPB_PSEAE Chaperone protein ClpB OS=Pseudomonas aeruginosa (strain ATCC 15692 / PAO1 / 1C / PRS 101 / LMG 12228) GN=clpB PE=3 SV=1	1	2	1	1	2.6	1.4	1.4	95.004	854	854	0	7.3851	0	1				73	27;701	True;False	27;715	52;1355;1356	108;2652;2653	108;2653
sp|Q9HW02|MURC_PSEAE	sp|Q9HW02|MURC_PSEAE	2	2	2	>sp|Q9HW02|MURC_PSEAE UDP-N-acetylmuramate--L-alanine ligase OS=Pseudomonas aeruginosa (strain ATCC 15692 / PAO1 / 1C / PRS 101 / LMG 12228) GN=murC PE=3 SV=1	1	2	2	2	8.1	8.1	8.1	51.981	480	480	0	17.695	3150600	3				74	485;754	True;True	493;769	933;934;1448	1783;1784;2867	1783;2867
sp|Q9HWC9|RPOC_PSEAE	sp|Q9HWC9|RPOC_PSEAE	31	31	31	>sp|Q9HWC9|RPOC_PSEAE DNA-directed RNA polymerase subunit beta OS=Pseudomonas aeruginosa (strain ATCC 15692 / PAO1 / 1C / PRS 101 / LMG 12228) GN=rpoC PE=3 SV=1	1	31	31	31	32.5	32.5	32.5	154.38	1399	1399	0	263.67	441520000	101				75	14;66;68;97;136;168;176;180;196;217;251;254;286;343;356;402;451;464;470;498;524;540;550;560;604;660;693;766;821;840;895	True;True;True;True;True;True;True;True;True;True;True;True;True;True;True;True;True;True;True;True;True;True;True;True;True;True;True;True;True;True;True	14;67;69;98;137;171;179;183;200;221;256;259;291;349;362;410;459;472;478;506;533;550;561;571;617;673;707;781;836;855;910	25;26;125;126;129;181;247;248;249;250;310;322;323;328;329;358;359;392;393;448;452;453;508;509;605;606;607;630;631;773;867;868;898;909;910;954;955;1002;1003;1033;1050;1051;1066;1189;1190;1278;1339;1340;1464;1465;1569;1570;1571;1605;1711;1712	58;59;279;280;281;282;283;284;285;289;290;291;387;388;513;514;515;516;517;518;519;520;521;522;523;669;691;692;693;701;702;703;704;745;746;747;748;749;750;751;752;816;817;818;906;910;911;1011;1012;1013;1183;1184;1185;1186;1187;1220;1221;1492;1660;1661;1662;1663;1664;1665;1666;1667;1668;1718;1736;1737;1809;1810;1811;1896;1897;1898;1899;1968;1969;1996;1997;2018;2290;2291;2292;2293;2294;2458;2459;259…	58;285;289;388;517;669;692;702;746;816;906;911;1012;1183;1221;1492;1662;1718;1736;1809;1896;1969;1997;2018;2290;2459;2597;2890;3086;3159;3376
sp|Q9HWD2|EFG1_PSEAE;sp|Q9I244|EFG2_PSEAE	sp|Q9HWD2|EFG1_PSEAE	17;5	17;5	17;5	>sp|Q9HWD2|EFG1_PSEAE Elongation factor G 1 OS=Pseudomonas aeruginosa (strain ATCC 15692 / PAO1 / 1C / PRS 101 / LMG 12228) GN=fusA PE=1 SV=1	2	17	17	17	36.1	36.1	36.1	77.784	706	706;702	0	157.62	313800000	47				76	26;33;99;107;172;207;279;285;303;305;325;415;450;543;592;864;875	True;True;True;True;True;True;True;True;True;True;True;True;True;True;True;True;True	26;33;100;108;175;211;284;290;309;311;331;423;458;553;605;879;890	50;51;61;62;184;185;198;316;317;376;497;506;507;539;540;542;543;574;575;795;796;865;866;1036;1037;1169;1170;1643;1644;1662;1663	104;105;106;107;120;121;391;392;420;421;677;678;779;992;1008;1009;1010;1065;1066;1067;1068;1069;1071;1072;1073;1126;1127;1128;1129;1534;1535;1657;1658;1659;1972;1973;2255;2256;2257;3213;3214;3215;3216;3217;3218;3239;3240;3241	105;120;392;420;677;779;992;1010;1068;1071;1126;1534;1659;1973;2255;3213;3241
sp|Q9HWD8|RL2_PSEAE	sp|Q9HWD8|RL2_PSEAE	4	4	4	>sp|Q9HWD8|RL2_PSEAE 50S ribosomal protein L2 OS=Pseudomonas aeruginosa (strain ATCC 15692 / PAO1 / 1C / PRS 101 / LMG 12228) GN=rplB PE=3 SV=1	1	4	4	4	21.6	21.6	21.6	29.579	273	273	0	35.034	53521000	16				77	101;300;301;646	True;True;True;True	102;306;307;659	188;189;190;191;533;534;535;536;1256	402;403;404;405;406;407;1053;1054;1055;1056;1057;1058;1059;1060;1061;2423	403;1054;1059;2423
sp|Q9HWE1|RS3_PSEAE	sp|Q9HWE1|RS3_PSEAE	1	1	1	>sp|Q9HWE1|RS3_PSEAE 30S ribosomal protein S3 OS=Pseudomonas aeruginosa (strain ATCC 15692 / PAO1 / 1C / PRS 101 / LMG 12228) GN=rpsC PE=3 SV=1	1	1	1	1	8.3	8.3	8.3	25.838	228	228	0	5.7861	8922500	1				78	403	TRUE	411	774	1493	1493
sp|Q9HWE2|RL16_PSEAE	sp|Q9HWE2|RL16_PSEAE	2	2	2	>sp|Q9HWE2|RL16_PSEAE 50S ribosomal protein L16 OS=Pseudomonas aeruginosa (strain ATCC 15692 / PAO1 / 1C / PRS 101 / LMG 12228) GN=rplP PE=3 SV=1	1	2	2	2	16.8	16.8	16.8	15.401	137	137	0	16.24	31439000	4				79	817;839	True;True	832;854	1561;1562;1603;1604	3072;3073;3157;3158	3073;3158
sp|Q9HWE5|RL14_PSEAE	sp|Q9HWE5|RL14_PSEAE	3	3	3	>sp|Q9HWE5|RL14_PSEAE 50S ribosomal protein L14 OS=Pseudomonas aeruginosa (strain ATCC 15692 / PAO1 / 1C / PRS 101 / LMG 12228) GN=rplN PE=3 SV=1	1	3	3	3	31.1	31.1	31.1	13.412	122	122	0	40.421	31292000	7				80	218;555;876	True;True;True	222;566;891	394;395;1058;1059;1664;1665	819;820;2006;2007;2008;3242;3243	819;2007;3242
sp|Q9HWE8|RS14_PSEAE	sp|Q9HWE8|RS14_PSEAE	1	1	1	>sp|Q9HWE8|RS14_PSEAE 30S ribosomal protein S14 OS=Pseudomonas aeruginosa (strain ATCC 15692 / PAO1 / 1C / PRS 101 / LMG 12228) GN=rpsN PE=3 SV=1	1	1	1	1	12.9	12.9	12.9	11.565	101	101	0	6.4954	656160	1				81	51	TRUE	52	98	233	233
sp|Q9HWF2|RS5_PSEAE	sp|Q9HWF2|RS5_PSEAE	3	3	3	>sp|Q9HWF2|RS5_PSEAE 30S ribosomal protein S5 OS=Pseudomonas aeruginosa (strain ATCC 15692 / PAO1 / 1C / PRS 101 / LMG 12228) GN=rpsE PE=3 SV=1	1	3	3	3	28.3	28.3	28.3	17.625	166	166	0	41.098	37325000	9				82	112;336;863	True;True;True	113;342;878	208;209;594;1640;1641;1642	439;440;441;1169;1170;3209;3210;3211;3212	440;1170;3209
sp|Q9HWF7|RS13_PSEAE	sp|Q9HWF7|RS13_PSEAE	1	1	1	>sp|Q9HWF7|RS13_PSEAE 30S ribosomal protein S13 OS=Pseudomonas aeruginosa (strain ATCC 15692 / PAO1 / 1C / PRS 101 / LMG 12228) GN=rpsM PE=3 SV=1	1	1	1	1	11	11	11	13.265	118	118	0	6.609	8571900	4				83	354	TRUE	360	626;627	1214;1215;1216;1217	1215
sp|Q9HWG0|UVRA_PSEAE	sp|Q9HWG0|UVRA_PSEAE	1	1	1	>sp|Q9HWG0|UVRA_PSEAE UvrABC system protein A OS=Pseudomonas aeruginosa (strain ATCC 15692 / PAO1 / 1C / PRS 101 / LMG 12228) GN=uvrA PE=3 SV=1	1	1	1	1	1.6	1.6	1.6	104.49	945	945	0	8.8807	1695400	2				84	454	TRUE	462	871;872	1671;1672	1671
sp|Q9HX33|SYL_PSEAE	sp|Q9HX33|SYL_PSEAE	1	1	1	>sp|Q9HX33|SYL_PSEAE Leucine--tRNA ligase OS=Pseudomonas aeruginosa (strain ATCC 15692 / PAO1 / 1C / PRS 101 / LMG 12228) GN=leuS PE=3 SV=1	1	1	1	1	1.9	1.9	1.9	97.647	873	873	0	18.692	4484300	6				85	235	TRUE	239	417;418;419;420	853;854;855;856;857;858	858
sp|Q9HXJ4|ISPG_PSEAE	sp|Q9HXJ4|ISPG_PSEAE	1	1	1	>sp|Q9HXJ4|ISPG_PSEAE 4-hydroxy-3-methylbut-2-en-1-yl diphosphate synthase (flavodoxin) OS=Pseudomonas aeruginosa (strain ATCC 15692 / PAO1 / 1C / PRS 101 / LMG 12228) GN=ispG PE=3 SV=1	1	1	1	1	4.9	4.9	4.9	40.056	371	371	0	11.011	2570500	1				86	649	TRUE	662	1261	2431	2431
sp|Q9HXN2|PUR4_PSEAE	sp|Q9HXN2|PUR4_PSEAE	3	3	3	>sp|Q9HXN2|PUR4_PSEAE Phosphoribosylformylglycinamidine synthase OS=Pseudomonas aeruginosa (strain ATCC 15692 / PAO1 / 1C / PRS 101 / LMG 12228) GN=purL PE=3 SV=1	1	3	3	3	3.2	3.2	3.2	140.65	1298	1298	0	17.289	10756000	5				87	635;843;889	True;True;True	648;858;904	1239;1609;1610;1700;1701	2396;3163;3164;3359;3360	2396;3163;3360
sp|Q9HXZ1|DPO3A_PSEAE	sp|Q9HXZ1|DPO3A_PSEAE	1	1	1	>sp|Q9HXZ1|DPO3A_PSEAE DNA polymerase III subunit alpha OS=Pseudomonas aeruginosa (strain ATCC 15692 / PAO1 / 1C / PRS 101 / LMG 12228) GN=dnaE PE=3 SV=1	1	1	1	1	1.6	1.6	1.6	130.9	1173	1173	0	8.425	962980	1				88	113	TRUE	114	210	442	442
sp|Q9HXZ4|PYRG_PSEAE	sp|Q9HXZ4|PYRG_PSEAE	7	7	7	>sp|Q9HXZ4|PYRG_PSEAE CTP synthase OS=Pseudomonas aeruginosa (strain ATCC 15692 / PAO1 / 1C / PRS 101 / LMG 12228) GN=pyrG PE=3 SV=1	1	7	7	7	16.8	16.8	16.8	59.617	542	542	0	57.796	46065000	9				89	270;323;376;711;751;883;901	True;True;True;True;True;True;True	275;329;382;725;766;898;916	479;480;571;572;710;1373;1443;1444;1688;1724	947;948;1123;1124;1376;2690;2861;2862;3340;3341;3394	947;1123;1376;2690;2861;3340;3394
sp|Q9HXZ5|ENO_PSEAE	sp|Q9HXZ5|ENO_PSEAE	2	2	2	>sp|Q9HXZ5|ENO_PSEAE Enolase OS=Pseudomonas aeruginosa (strain ATCC 15692 / PAO1 / 1C / PRS 101 / LMG 12228) GN=eno PE=3 SV=1	1	2	2	2	7.5	7.5	7.5	45.195	429	429	0	25.026	15706000	4				90	234;830	True;True	238;845	416;1589;1590	852;3121;3122;3123	852;3121
sp|Q9HZ71|RS1_PSEAE	sp|Q9HZ71|RS1_PSEAE	6	6	6	>sp|Q9HZ71|RS1_PSEAE 30S ribosomal protein S1 OS=Pseudomonas aeruginosa (strain ATCC 15692 / PAO1 / 1C / PRS 101 / LMG 12228) GN=rpsA PE=3 SV=1	1	6	6	6	14.5	14.5	14.5	61.869	559	559	0	49.079	97402000	15				91	32;160;246;262;624;626	True;True;True;True;True;True	32;163;251;267;637;639	59;60;296;297;441;442;465;466;1221;1224;1225	118;119;644;645;646;896;897;898;899;900;925;926;2363;2364;2370;2371	119;645;897;926;2363;2371
sp|Q9HZ76|WBPE_PSEAE	sp|Q9HZ76|WBPE_PSEAE	3	3	3	>sp|Q9HZ76|WBPE_PSEAE UDP-2-acetamido-2-deoxy-3-oxo-D-glucuronate aminotransferase OS=Pseudomonas aeruginosa (strain ATCC 15692 / PAO1 / 1C / PRS 101 / LMG 12228) GN=wbpE PE=1 SV=1	1	3	3	3	12.8	12.8	12.8	38.924	359	359	0	30.908	47719000	9				92	424;763;885	True;True;True	432;778;900	810;811;1460;1461;1690;1691	1551;1552;2884;2885;2886;3344;3345;3346;3347	1551;2886;3344
sp|Q9HZE0|DHE2_PSEAE	sp|Q9HZE0|DHE2_PSEAE	38	38	38	>sp|Q9HZE0|DHE2_PSEAE NAD-specific glutamate dehydrogenase OS=Pseudomonas aeruginosa (strain ATCC 15692 / PAO1 / 1C / PRS 101 / LMG 12228) GN=gdhB PE=1 SV=1	1	38	38	38	33.7	33.7	33.7	182.64	1620	1620	0	323.31	833000000	141				93	7;13;52;55;59;72;88;127;173;184;187;194;203;232;296;314;338;363;414;431;447;465;487;525;533;572;574;630;667;674;734;787;793;807;844;852;882;904	True;True;True;True;True;True;True;True;True;True;True;True;True;True;True;True;True;True;True;True;True;True;True;True;True;True;True;True;True;True;True;True;True;True;True;True;True;True	7;13;53;56;60;73;89;128;176;188;191;198;207;236;301;320;344;369;422;439;455;473;495;534;542;583;586;643;680;687;748;802;808;822;859;867;897;919	12;13;24;99;100;105;106;113;114;135;136;167;168;232;233;234;235;318;338;339;340;343;344;355;369;370;412;413;526;559;560;597;598;640;641;791;792;793;794;821;822;848;849;850;851;899;900;937;938;1004;1005;1018;1019;1087;1088;1094;1231;1290;1291;1302;1303;1414;1415;1505;1506;1516;1517;1543;1611;1612;1623;1686;1687;1728;1729	23;24;25;26;27;57;234;235;236;246;247;258;259;260;302;303;358;359;360;361;362;363;467;468;469;470;471;472;473;474;475;476;477;478;479;480;481;482;483;484;485;486;487;488;489;490;491;679;716;717;718;719;722;723;741;766;767;847;848;1035;1108;1109;1110;1111;1175;1176;1230;1231;1232;1529;1530;1531;1532;1533;1564;1565;1624;1625;1626;1627;1628;1629;1630;1631;1632;1633;1634;1719;1720;1721;1787;1788;1789…	25;57;234;247;258;302;359;468;679;717;723;741;766;848;1035;1111;1175;1232;1533;1564;1629;1721;1787;1900;1924;2043;2054;2378;2473;2487;2808;2983;3005;3049;3167;3185;3335;3401
sp|Q9HZJ2|FADB_PSEAE	sp|Q9HZJ2|FADB_PSEAE	8	8	8	>sp|Q9HZJ2|FADB_PSEAE Fatty acid oxidation complex subunit alpha OS=Pseudomonas aeruginosa (strain ATCC 15692 / PAO1 / 1C / PRS 101 / LMG 12228) GN=fadB PE=3 SV=1	1	8	8	8	17.8	17.8	17.8	76.953	715	715	0	68.871	29927000	14				94	166;260;452;706;719;747;806;892	True;True;True;True;True;True;True;True	169;265;460;720;733;762;821;907	307;462;463;869;1363;1390;1436;1437;1541;1542;1707	666;921;922;923;1669;2664;2778;2779;2846;2847;2848;3047;3048;3370	666;923;1669;2664;2779;2847;3048;3370
sp|Q9HZJ3|FADA_PSEAE	sp|Q9HZJ3|FADA_PSEAE	1	1	1	>sp|Q9HZJ3|FADA_PSEAE 3-ketoacyl-CoA thiolase OS=Pseudomonas aeruginosa (strain ATCC 15692 / PAO1 / 1C / PRS 101 / LMG 12228) GN=fadA PE=3 SV=1	1	1	1	1	3.3	3.3	3.3	41.643	391	391	0	6.7131	4627000	1				95	90	TRUE	91	170	365	365
sp|Q9I099|SYT_PSEAE	sp|Q9I099|SYT_PSEAE	2	2	2	>sp|Q9I099|SYT_PSEAE Threonine--tRNA ligase OS=Pseudomonas aeruginosa (strain ATCC 15692 / PAO1 / 1C / PRS 101 / LMG 12228) GN=thrS PE=3 SV=1	1	2	2	2	2.8	2.8	2.8	73.079	640	640	0	11.977	2240600	2				96	513;612	True;True	521;625	982;1204	1858;2325	1858;2325
sp|Q9I0A2|RL20_PSEAE	sp|Q9I0A2|RL20_PSEAE	2	2	2	>sp|Q9I0A2|RL20_PSEAE 50S ribosomal protein L20 OS=Pseudomonas aeruginosa (strain ATCC 15692 / PAO1 / 1C / PRS 101 / LMG 12228) GN=rplT PE=3 SV=1	1	2	2	2	16.1	16.1	16.1	13.365	118	118	0	12.273	11095000	2				97	1;800	True;True	1;815	2;1529;1530	5;3023;3024	5;3024
sp|Q9I0J4|NUOI_PSEAE	sp|Q9I0J4|NUOI_PSEAE	1	1	1	>sp|Q9I0J4|NUOI_PSEAE NADH-quinone oxidoreductase subunit I OS=Pseudomonas aeruginosa (strain ATCC 15692 / PAO1 / 1C / PRS 101 / LMG 12228) GN=nuoI PE=3 SV=1	1	1	1	1	7.1	7.1	7.1	20.61	182	182	0	5.9539	613180	1				98	241	TRUE	246	435	889	889
sp|Q9I0J5|NUOH_PSEAE	sp|Q9I0J5|NUOH_PSEAE	1	1	1	>sp|Q9I0J5|NUOH_PSEAE NADH-quinone oxidoreductase subunit H OS=Pseudomonas aeruginosa (strain ATCC 15692 / PAO1 / 1C / PRS 101 / LMG 12228) GN=nuoH PE=3 SV=1	1	1	1	1	4.5	4.5	4.5	36.743	331	331	0	10.871	9937500	3				99	789	TRUE	804	1509;1510	2986;2987;2988	2988
sp|Q9I0J6|NUOG_PSEAE	sp|Q9I0J6|NUOG_PSEAE	12	12	12	>sp|Q9I0J6|NUOG_PSEAE NADH-quinone oxidoreductase subunit G OS=Pseudomonas aeruginosa (strain ATCC 15692 / PAO1 / 1C / PRS 101 / LMG 12228) GN=nuoG PE=3 SV=1	1	12	12	12	21.1	21.1	21.1	98.999	905	905	0	95.698	175210000	25				100	47;64;96;220;250;446;463;504;642;775;856;858	True;True;True;True;True;True;True;True;True;True;True;True	47;65;97;224;255;454;471;512;655;790;871;873	86;87;122;123;179;180;397;447;846;847;896;897;966;967;1248;1249;1485;1627;1628;1631	185;186;187;276;277;383;384;385;386;822;905;1622;1623;1715;1716;1717;1825;1826;1827;1828;2411;2412;2946;3192;3193;3194;3197	187;276;386;822;905;1623;1717;1827;2412;2946;3193;3197
sp|Q9I0J7|NUOF_PSEAE	sp|Q9I0J7|NUOF_PSEAE	1	1	1	>sp|Q9I0J7|NUOF_PSEAE NADH-quinone oxidoreductase subunit F OS=Pseudomonas aeruginosa (strain ATCC 15692 / PAO1 / 1C / PRS 101 / LMG 12228) GN=nuoF PE=3 SV=1	1	1	1	1	4.5	4.5	4.5	48.678	448	448	0	15.301	5216800	4				101	551	TRUE	562	1052;1053	1998;1999;2000;2001	1998
sp|Q9I0J9|NUOCD_PSEAE	sp|Q9I0J9|NUOCD_PSEAE	7	7	7	>sp|Q9I0J9|NUOCD_PSEAE NADH-quinone oxidoreductase subunit C/D OS=Pseudomonas aeruginosa (strain ATCC 15692 / PAO1 / 1C / PRS 101 / LMG 12228) GN=nuoC PE=3 SV=1	1	7	7	7	15.2	15.2	15.2	68.322	593	593	0	54.132	68048000	13				102	159;221;275;462;638;720;724	True;True;True;True;True;True;True	162;225;280;470;651;734;738	295;398;399;490;894;895;1242;1391;1397	643;823;824;971;1713;1714;2399;2400;2401;2402;2403;2780;2787	643;824;971;1713;2400;2780;2787
sp|Q9I0K4|ACEA_PSEAE	sp|Q9I0K4|ACEA_PSEAE	11	11	11	>sp|Q9I0K4|ACEA_PSEAE Isocitrate lyase OS=Pseudomonas aeruginosa (strain ATCC 15692 / PAO1 / 1C / PRS 101 / LMG 12228) GN=PA2634 PE=1 SV=1	1	11	11	11	31.6	31.6	31.6	58.886	531	531	0	112.77	152790000	51				103	157;188;309;418;483;530;590;628;652;708;845	True;True;True;True;True;True;True;True;True;True;True	160;192;315;426;491;539;603;641;665;722;860	289;290;345;346;549;550;801;802;930;931;1013;1014;1166;1167;1228;1229;1266;1365;1366;1367;1613;1614	628;629;630;631;632;724;725;726;727;728;1081;1082;1541;1542;1778;1779;1780;1781;1912;1913;1914;1915;1916;1917;1918;2248;2249;2250;2251;2252;2253;2374;2375;2438;2666;2667;2668;2669;2670;2671;2672;2673;2674;2675;2676;2677;2678;2679;2680;2681;3168;3169	628;728;1081;1542;1781;1913;2248;2374;2438;2667;3169
sp|Q9I0Q0|PQSH_PSEAE	sp|Q9I0Q0|PQSH_PSEAE	1	1	1	>sp|Q9I0Q0|PQSH_PSEAE 2-heptyl-3-hydroxy-4(1H)-quinolone synthase OS=Pseudomonas aeruginosa (strain ATCC 15692 / PAO1 / 1C / PRS 101 / LMG 12228) GN=pqsH PE=3 SV=1	1	1	1	1	7.6	7.6	7.6	42.081	382	382	0	6.9238	4456400	3				104	94	TRUE	95	176;177	379;380;381	379
sp|Q9I1S2|HCNB_PSEAE	sp|Q9I1S2|HCNB_PSEAE	6	6	6	>sp|Q9I1S2|HCNB_PSEAE Hydrogen cyanide synthase subunit HcnB OS=Pseudomonas aeruginosa (strain ATCC 15692 / PAO1 / 1C / PRS 101 / LMG 12228) GN=hcnB PE=1 SV=1	1	6	6	6	19	19	19	50.388	464	464	0	42.77	48562000	13				105	60;98;206;321;484;743	True;True;True;True;True;True	61;99;210;327;492;757	115;116;182;183;374;375;569;932;1428	261;262;389;390;773;774;775;776;777;778;1121;1782;2836	261;390;775;1121;1782;2836
sp|Q9I2A8|ATOB_PSEAE	sp|Q9I2A8|ATOB_PSEAE	3	3	3	>sp|Q9I2A8|ATOB_PSEAE Acetyl-CoA acetyltransferase OS=Pseudomonas aeruginosa (strain ATCC 15692 / PAO1 / 1C / PRS 101 / LMG 12228) GN=atoB PE=3 SV=1	1	3	3	3	12.2	12.2	12.2	40.405	393	393	0	18.642	8195500	2				106	170;324;569	True;True;True	173;330;580	313;314;573;1083	672;673;1125;2036	672;1125;2036
sp|Q9I2U8|SYQ_PSEAE	sp|Q9I2U8|SYQ_PSEAE	1	1	1	>sp|Q9I2U8|SYQ_PSEAE Glutamine--tRNA ligase OS=Pseudomonas aeruginosa (strain ATCC 15692 / PAO1 / 1C / PRS 101 / LMG 12228) GN=glnS PE=1 SV=1	1	1	1	1	3.2	3.2	3.2	62.912	556	556	0	14.662	1930400	1				107	855	TRUE	870	1626	3191	3191
sp|Q9I2V5|ACNB_PSEAE	sp|Q9I2V5|ACNB_PSEAE	17	17	17	>sp|Q9I2V5|ACNB_PSEAE Aconitate hydratase B OS=Pseudomonas aeruginosa (strain ATCC 15692 / PAO1 / 1C / PRS 101 / LMG 12228) GN=acnB PE=3 SV=1	1	17	17	17	26.8	26.8	26.8	93.627	869	869	0	148.46	192840000	44				108	22;35;131;140;141;259;268;441;495;531;541;573;648;694;741;832;870	True;True;True;True;True;True;True;True;True;True;True;True;True;True;True;True;True	22;35;132;143;144;264;273;449;503;540;551;584;585;661;708;755;847;885	43;44;65;241;242;264;265;460;461;475;476;837;949;950;1015;1016;1034;1089;1090;1091;1092;1093;1259;1260;1341;1342;1426;1592;1593;1653;1654	97;98;142;499;500;501;502;503;586;587;919;920;940;941;942;1586;1804;1805;1919;1920;1970;2044;2045;2046;2047;2048;2049;2050;2051;2052;2427;2428;2429;2430;2599;2600;2601;2833;3125;3126;3127;3128;3129;3229;3230	98;142;501;586;587;919;942;1586;1804;1920;1970;2044;2429;2601;2833;3125;3230	10;11	411;423
sp|Q9I383|SELD_PSEAE	sp|Q9I383|SELD_PSEAE	2	2	2	>sp|Q9I383|SELD_PSEAE Selenide, water dikinase OS=Pseudomonas aeruginosa (strain ATCC 15692 / PAO1 / 1C / PRS 101 / LMG 12228) GN=selD PE=3 SV=1	1	2	2	2	8.7	8.7	8.7	36.353	344	344	0	11.056	10150000	2				109	80;777	True;True	81;792	150;1488	326;2951	326;2951
sp|Q9I3A8|GPDA_PSEAE	sp|Q9I3A8|GPDA_PSEAE	1	1	1	>sp|Q9I3A8|GPDA_PSEAE Glycerol-3-phosphate dehydrogenase [NAD(P)+] OS=Pseudomonas aeruginosa (strain ATCC 15692 / PAO1 / 1C / PRS 101 / LMG 12228) GN=gpsA PE=3 SV=1	1	1	1	1	3.2	3.2	3.2	36.773	340	340	0	9.8422	628820	1				110	728	TRUE	742	1406	2798	2798
sp|Q9I3D1|DLDH2_PSEAE	sp|Q9I3D1|DLDH2_PSEAE	10	10	10	>sp|Q9I3D1|DLDH2_PSEAE Dihydrolipoyl dehydrogenase OS=Pseudomonas aeruginosa (strain ATCC 15692 / PAO1 / 1C / PRS 101 / LMG 12228) GN=lpdG PE=3 SV=1	1	10	10	10	30.1	30.1	30.1	50.164	478	478	0	88.974	147710000	26				111	21;75;92;93;307;439;440;597;640;749	True;True;True;True;True;True;True;True;True;True	21;76;93;94;313;447;448;610;653;764	41;42;140;141;172;173;174;175;545;546;835;836;1178;1179;1244;1439;1440	93;94;95;96;310;311;369;370;371;372;373;374;375;376;377;378;1075;1076;1077;1584;1585;2266;2267;2405;2406;2850;2851	94;310;374;377;1076;1584;1585;2266;2405;2851
sp|Q9I3D2|ODO2_PSEAE	sp|Q9I3D2|ODO2_PSEAE	1	1	1	>sp|Q9I3D2|ODO2_PSEAE Dihydrolipoyllysine-residue succinyltransferase component of 2-oxoglutarate dehydrogenase complex OS=Pseudomonas aeruginosa (strain ATCC 15692 / PAO1 / 1C / PRS 101 / LMG 12228) GN=sucB PE=3 SV=1	1	1	1	1	6.4	6.4	6.4	42.887	409	409	0	9.0025	9077200	2				112	519	TRUE	527	990;991	1868;1869	1868
sp|Q9I3F5|ACNA_PSEAE	sp|Q9I3F5|ACNA_PSEAE	14	14	14	>sp|Q9I3F5|ACNA_PSEAE Aconitate hydratase A OS=Pseudomonas aeruginosa (strain ATCC 15692 / PAO1 / 1C / PRS 101 / LMG 12228) GN=acnA PE=3 SV=1	1	14	14	14	25.6	25.6	25.6	99.147	910	910	0	132.23	183880000	53				113	53;175;329;357;371;413;478;735;762;769;803;811;865;903	True;True;True;True;True;True;True;True;True;True;True;True;True;True	54;178;335;363;377;421;486;749;777;784;818;826;880;918	101;102;320;321;582;632;653;654;789;790;920;1416;1417;1418;1419;1459;1469;1470;1536;1537;1549;1550;1645;1726;1727	237;238;239;681;682;683;684;685;686;687;688;689;690;1139;1222;1259;1260;1261;1527;1528;1752;1753;1754;2810;2811;2812;2813;2814;2815;2816;2817;2818;2819;2820;2821;2883;2894;2895;2896;2897;2898;2899;2900;3039;3040;3041;3055;3056;3219;3396;3397;3398;3399	238;684;1139;1222;1260;1527;1753;2815;2883;2894;3041;3056;3219;3397
sp|Q9I4Z4|PAL_PSEAE	sp|Q9I4Z4|PAL_PSEAE	1	1	1	>sp|Q9I4Z4|PAL_PSEAE Peptidoglycan-associated lipoprotein OS=Pseudomonas aeruginosa (strain ATCC 15692 / PAO1 / 1C / PRS 101 / LMG 12228) GN=pal PE=3 SV=1	1	1	1	1	11.3	11.3	11.3	17.925	168	168	0	11.251	38947000	4				114	900	TRUE	915	1722;1723	3390;3391;3392;3393	3392
sp|Q9I553|SYA_PSEAE	sp|Q9I553|SYA_PSEAE	1	1	1	>sp|Q9I553|SYA_PSEAE Alanine--tRNA ligase OS=Pseudomonas aeruginosa (strain ATCC 15692 / PAO1 / 1C / PRS 101 / LMG 12228) GN=alaS PE=3 SV=1	1	1	1	1	1.9	1.9	1.9	94.701	874	874	0	5.6182	0	1				115	6	TRUE	6	11	22	22
sp|Q9I558|ACSA1_PSEAE	sp|Q9I558|ACSA1_PSEAE	3	3	3	>sp|Q9I558|ACSA1_PSEAE Acetyl-coenzyme A synthetase 1 OS=Pseudomonas aeruginosa (strain ATCC 15692 / PAO1 / 1C / PRS 101 / LMG 12228) GN=acsA1 PE=3 SV=1	1	3	3	3	11.1	11.1	11.1	71.762	651	651	0	17.277	42463000	3				116	181;247;854	True;True;True	184;252;869	330;331;443;1625	705;706;901;3190	705;901;3190
sp|Q9I5A5|PTA_PSEAE	sp|Q9I5A5|PTA_PSEAE	1	1	1	>sp|Q9I5A5|PTA_PSEAE Phosphate acetyltransferase OS=Pseudomonas aeruginosa (strain ATCC 15692 / PAO1 / 1C / PRS 101 / LMG 12228) GN=pta PE=1 SV=1	1	1	1	1	1.4	1.4	1.4	75.696	704	704	0	7.1683	4417300	2				117	795	TRUE	810	1520;1521	3011;3012	3012
sp|Q9I5Y4|PGK_PSEAE	sp|Q9I5Y4|PGK_PSEAE	1	1	1	>sp|Q9I5Y4|PGK_PSEAE Phosphoglycerate kinase OS=Pseudomonas aeruginosa (strain ATCC 15692 / PAO1 / 1C / PRS 101 / LMG 12228) GN=pgk PE=3 SV=1	1	1	1	1	4.4	4.4	4.4	40.404	387	387	0	8.1981	6521300	1				118	764	TRUE	779	1462	2887	2887
sp|Q9I5Z0|METK_PSEAE	sp|Q9I5Z0|METK_PSEAE	6	6	6	>sp|Q9I5Z0|METK_PSEAE S-adenosylmethionine synthase OS=Pseudomonas aeruginosa (strain ATCC 15692 / PAO1 / 1C / PRS 101 / LMG 12228) GN=metK PE=3 SV=1	1	6	6	6	25	25	25	42.709	396	396	0	35.565	26055000	10				119	178;322;557;594;658;853	True;True;True;True;True;True	181;328;568;607;671;868	326;570;1061;1173;1174;1276;1624	698;699;1122;2010;2011;2260;2261;2456;3187;3188;3189	699;1122;2010;2260;2456;3187
sp|Q9I636|MASZ_PSEAE	sp|Q9I636|MASZ_PSEAE	1	1	1	>sp|Q9I636|MASZ_PSEAE Malate synthase G OS=Pseudomonas aeruginosa (strain ATCC 15692 / PAO1 / 1C / PRS 101 / LMG 12228) GN=glcB PE=3 SV=1	1	1	1	1	1.5	1.5	1.5	78.659	725	725	0	5.6791	2692300	2				120	380	TRUE	386	715;716	1384;1385	1385
sp|Q9I685|SAHH_PSEAE	sp|Q9I685|SAHH_PSEAE	14	14	14	>sp|Q9I685|SAHH_PSEAE Adenosylhomocysteinase OS=Pseudomonas aeruginosa (strain ATCC 15692 / PAO1 / 1C / PRS 101 / LMG 12228) GN=ahcY PE=3 SV=1	1	14	14	14	36.5	36.5	36.5	51.399	469	469	0	120.1	233490000	46				121	192;256;347;365;399;507;527;589;616;639;651;765;824;874	True;True;True;True;True;True;True;True;True;True;True;True;True;True	196;261;353;371;407;515;536;602;629;652;664;780;839;889	352;353;455;456;613;614;644;645;646;761;762;763;972;973;1007;1008;1164;1165;1209;1210;1243;1264;1265;1463;1577;1578;1660;1661	737;738;739;913;914;915;1193;1194;1195;1237;1238;1239;1240;1241;1242;1243;1244;1245;1246;1247;1469;1470;1471;1841;1842;1903;1904;1905;2246;2247;2341;2342;2343;2344;2404;2434;2435;2436;2437;2888;3102;3103;3104;3105;3237;3238	739;915;1193;1242;1471;1841;1904;2246;2341;2404;2435;2888;3103;3237
sp|Q9I6E0|ILVD_PSEAE	sp|Q9I6E0|ILVD_PSEAE	1	1	1	>sp|Q9I6E0|ILVD_PSEAE Dihydroxy-acid dehydratase OS=Pseudomonas aeruginosa (strain ATCC 15692 / PAO1 / 1C / PRS 101 / LMG 12228) GN=ilvD PE=3 SV=1	1	1	1	1	2.1	2.1	2.1	65.159	612	612	0	8.6526	4150300	2				122	37	TRUE	37	67;68	145;146	145
sp|Q9I6M4|DAVT_PSEAE	sp|Q9I6M4|DAVT_PSEAE	1	1	1	>sp|Q9I6M4|DAVT_PSEAE 5-aminovalerate aminotransferase DavT OS=Pseudomonas aeruginosa (strain ATCC 15692 / PAO1 / 1C / PRS 101 / LMG 12228) GN=davT PE=1 SV=1	1	1	1	1	3.3	3.3	3.3	45.22	426	426	0	6.468	5519800	1				123	692	TRUE	706	1337;1338	2595;2596	2596
sp|Q9I6M5|DAVD_PSEAE	sp|Q9I6M5|DAVD_PSEAE	1	1	1	>sp|Q9I6M5|DAVD_PSEAE Glutarate-semialdehyde dehydrogenase DavD OS=Pseudomonas aeruginosa (strain ATCC 15692 / PAO1 / 1C / PRS 101 / LMG 12228) GN=davD PE=1 SV=1	1	1	1	1	3.1	3.1	3.1	51.622	483	483	0	11.848	9031900	2				124	822	TRUE	837	1572;1573	3089;3090	3089
sp|Q9I742|CLPV1_PSEAE	sp|Q9I742|CLPV1_PSEAE	3	3	3	>sp|Q9I742|CLPV1_PSEAE Protein ClpV1 OS=Pseudomonas aeruginosa (strain ATCC 15692 / PAO1 / 1C / PRS 101 / LMG 12228) GN=clpV1 PE=1 SV=1	1	3	3	3	5.2	5.2	5.2	98.737	902	902	0	20.39	19531000	4				125	205;242;553	True;True;True	209;247;564	373;436;1055;1056	772;890;2003;2004	772;890;2003
sp|Q9I7B8|SYGB_PSEAE	sp|Q9I7B8|SYGB_PSEAE	2	2	2	>sp|Q9I7B8|SYGB_PSEAE Glycine--tRNA ligase beta subunit OS=Pseudomonas aeruginosa (strain ATCC 15692 / PAO1 / 1C / PRS 101 / LMG 12228) GN=glyS PE=3 SV=1	1	2	2	2	3.9	3.9	3.9	73.973	684	684	0	12.316	7311500	4				126	2;379	True;True	2;385	3;4;714	6;7;8;1383	6;1383
sp|Q9I7C2|GYRB_PSEAE	sp|Q9I7C2|GYRB_PSEAE	3	3	3	>sp|Q9I7C2|GYRB_PSEAE DNA gyrase subunit B OS=Pseudomonas aeruginosa (strain ATCC 15692 / PAO1 / 1C / PRS 101 / LMG 12228) GN=gyrB PE=3 SV=1	1	3	3	3	5.8	5.8	5.8	90.188	806	806	0	26.805	9626300	2				127	596;695;707	True;True;True	609;709;721	1177;1343;1364	2265;2602;2665	2265;2602;2665
sp|Q9LCT3|SECA_PSEAE	sp|Q9LCT3|SECA_PSEAE	1	1	1	>sp|Q9LCT3|SECA_PSEAE Protein translocase subunit SecA OS=Pseudomonas aeruginosa (strain ATCC 15692 / PAO1 / 1C / PRS 101 / LMG 12228) GN=secA PE=3 SV=1	1	1	1	1	1.7	1.7	1.7	103.85	916	916	0	6.142	2926600	0				128	732	TRUE	746	1412	2806	2806
sp|Q9S646|PPK_PSEAE	sp|Q9S646|PPK_PSEAE	1	1	1	>sp|Q9S646|PPK_PSEAE Polyphosphate kinase OS=Pseudomonas aeruginosa (strain ATCC 15692 / PAO1 / 1C / PRS 101 / LMG 12228) GN=ppk PE=3 SV=1	1	1	1	1	2.9	2.9	2.9	78.292	690	690	0	6.6027	4014900	3				129	425	TRUE	433	812;813	1553;1554;1555	1554
tr|Q9HTD0|Q9HTD0_PSEAE	tr|Q9HTD0|Q9HTD0_PSEAE	1	1	1	>tr|Q9HTD0|Q9HTD0_PSEAE Probable biotin carboxylase subunit of a transcarboxylase OS=Pseudomonas aeruginosa (strain ATCC 15692 / PAO1 / 1C / PRS 101 / LMG 12228) GN=PA5436 PE=4 SV=1	1	1	1	1	3.2	3.2	3.2	51.848	471	471	0.005	5.5617	4291700	0				130	459	TRUE	467	878	1679	1679
tr|Q9HTD1|Q9HTD1_PSEAE	tr|Q9HTD1|Q9HTD1_PSEAE	29	29	29	>tr|Q9HTD1|Q9HTD1_PSEAE Probable transcarboxylase subunit OS=Pseudomonas aeruginosa (strain ATCC 15692 / PAO1 / 1C / PRS 101 / LMG 12228) GN=PA5435 PE=4 SV=1	1	29	29	29	53.9	53.9	53.9	66.095	607	607	0	231.82	760320000	140				131	10;17;76;77;86;87;110;122;143;158;228;295;297;299;328;337;404;549;614;653;654;723;834;835;836;886;887;890;896	True;True;True;True;True;True;True;True;True;True;True;True;True;True;True;True;True;True;True;True;True;True;True;True;True;True;True;True;True	10;17;77;78;87;88;111;123;146;161;232;300;302;303;305;334;343;412;559;560;627;666;667;737;849;850;851;901;902;905;911	18;19;29;30;31;32;142;143;144;163;164;165;166;204;205;223;224;268;269;291;292;293;294;408;524;525;527;528;529;530;532;580;581;595;596;775;776;1047;1048;1049;1207;1267;1268;1269;1270;1395;1396;1595;1596;1597;1598;1599;1600;1692;1693;1694;1695;1696;1697;1702;1703;1713;1714;1715	49;50;51;63;64;65;66;67;68;69;70;71;72;73;74;75;76;312;313;314;315;316;317;352;353;354;355;356;357;433;434;435;436;457;458;595;596;597;598;599;633;634;635;636;637;638;639;640;641;642;842;843;1033;1034;1036;1037;1038;1039;1040;1041;1042;1043;1044;1045;1046;1047;1048;1050;1051;1052;1135;1136;1137;1138;1171;1172;1173;1174;1494;1495;1988;1989;1990;1991;1992;1993;1994;1995;2336;2337;2439;2440;2441;244…	50;71;312;317;353;357;436;458;599;635;842;1033;1039;1050;1136;1172;1495;1989;2336;2440;2447;2785;3138;3142;3152;3348;3353;3364;3377	12;13	274;323
tr|Q9HTD9|Q9HTD9_PSEAE	tr|Q9HTD9|Q9HTD9_PSEAE	9	9	9	>tr|Q9HTD9|Q9HTD9_PSEAE Alcohol dehydrogenase OS=Pseudomonas aeruginosa (strain ATCC 15692 / PAO1 / 1C / PRS 101 / LMG 12228) GN=adhA PE=1 SV=1	1	9	9	9	38	38	38	35.911	342	342	0	71.986	145680000	31				132	11;18;78;134;332;420;611;617;827	True;True;True;True;True;True;True;True;True	11;18;79;135;338;428;624;630;842	20;21;33;34;145;146;147;245;589;590;805;806;1202;1203;1211;1212;1583;1584	52;53;77;78;79;80;81;82;83;318;319;320;321;322;511;1159;1160;1161;1162;1163;1164;1546;1547;2322;2323;2324;2345;2346;2347;2348;2349;3112;3113	52;78;319;511;1159;1546;2323;2345;3113
tr|Q9HU07|Q9HU07_PSEAE	tr|Q9HU07|Q9HU07_PSEAE	1	1	1	>tr|Q9HU07|Q9HU07_PSEAE Uncharacterized protein OS=Pseudomonas aeruginosa (strain ATCC 15692 / PAO1 / 1C / PRS 101 / LMG 12228) GN=PA5182 PE=4 SV=1	1	1	1	1	37.2	37.2	37.2	14.115	137	137	0.0050761	5.5797	112130000	6				133	709	TRUE	723	1368;1369;1370	2682;2683;2684;2685;2686;2687	2684
tr|Q9HUD3|Q9HUD3_PSEAE	tr|Q9HUD3|Q9HUD3_PSEAE	2	2	2	>tr|Q9HUD3|Q9HUD3_PSEAE Malic enzyme OS=Pseudomonas aeruginosa (strain ATCC 15692 / PAO1 / 1C / PRS 101 / LMG 12228) GN=PA5046 PE=4 SV=1	1	2	2	2	10	10	10	45.428	422	422	0	11.018	9355000	2				134	291;466	True;True	296;474	518;901	1025;1722	1025;1722
tr|Q9HUG0|Q9HUG0_PSEAE	tr|Q9HUG0|Q9HUG0_PSEAE	1	1	1	>tr|Q9HUG0|Q9HUG0_PSEAE Probable carbamoyl transferase OS=Pseudomonas aeruginosa (strain ATCC 15692 / PAO1 / 1C / PRS 101 / LMG 12228) GN=PA5005 PE=4 SV=1	1	1	1	1	4.3	4.3	4.3	66.079	585	585	0	5.9309	11712000	3				135	189	TRUE	193	347;348	729;730;731	729
tr|Q9HV96|Q9HV96_PSEAE	tr|Q9HV96|Q9HV96_PSEAE	2	2	2	>tr|Q9HV96|Q9HV96_PSEAE Uncharacterized protein OS=Pseudomonas aeruginosa (strain ATCC 15692 / PAO1 / 1C / PRS 101 / LMG 12228) GN=PA4701 PE=4 SV=1	1	2	2	2	5.8	5.8	5.8	58.376	520	520	0	10.998	10849000	1				136	609;767	True;True	622;782	1199;1466;1467	2319;2891;2892	2319;2891
tr|Q9HVA0|Q9HVA0_PSEAE	tr|Q9HVA0|Q9HVA0_PSEAE	1	1	1	>tr|Q9HVA0|Q9HVA0_PSEAE Acetolactate synthase OS=Pseudomonas aeruginosa (strain ATCC 15692 / PAO1 / 1C / PRS 101 / LMG 12228) GN=ilvI PE=3 SV=1	1	1	1	1	3.7	3.7	3.7	63.018	574	574	0	14.772	1344000	2				137	15	TRUE	15	27	60;61	60
tr|Q9HVJ1|Q9HVJ1_PSEAE	tr|Q9HVJ1|Q9HVJ1_PSEAE	2	2	2	>tr|Q9HVJ1|Q9HVJ1_PSEAE Probable ATP-binding component of ABC transporter OS=Pseudomonas aeruginosa (strain ATCC 15692 / PAO1 / 1C / PRS 101 / LMG 12228) GN=PA4595 PE=4 SV=1	1	2	2	2	4.5	4.5	4.5	61.32	554	554	0	15.341	4574200	2				138	657;809	True;True	670;824	1275;1546	2455;3052	2455;3052
tr|Q9HVU0|Q9HVU0_PSEAE	tr|Q9HVU0|Q9HVU0_PSEAE	2	2	2	>tr|Q9HVU0|Q9HVU0_PSEAE Rod shape-determining protein MreB OS=Pseudomonas aeruginosa (strain ATCC 15692 / PAO1 / 1C / PRS 101 / LMG 12228) GN=mreB PE=4 SV=1	1	2	2	2	7.2	7.2	7.2	36.976	345	345	0	11.482	19212000	2				139	281;288	True;True	286;293	499;500;512;513	994;995;1016;1017	995;1017
tr|Q9HVY5|Q9HVY5_PSEAE	tr|Q9HVY5|Q9HVY5_PSEAE	2	2	2	>tr|Q9HVY5|Q9HVY5_PSEAE Cytochrome b OS=Pseudomonas aeruginosa (strain ATCC 15692 / PAO1 / 1C / PRS 101 / LMG 12228) GN=PA4430 PE=3 SV=1	1	2	2	2	6.7	6.7	6.7	46.072	403	403	0	18.476	16223000	8				140	231;737	True;True	235;751	411;1421;1422	846;2823;2824;2825;2826;2827;2828;2829	846;2827
tr|Q9HVY6|Q9HVY6_PSEAE	tr|Q9HVY6|Q9HVY6_PSEAE	1	1	1	>tr|Q9HVY6|Q9HVY6_PSEAE Probable cytochrome c1 OS=Pseudomonas aeruginosa (strain ATCC 15692 / PAO1 / 1C / PRS 101 / LMG 12228) GN=PA4429 PE=4 SV=1	1	1	1	1	5.8	5.8	5.8	28.993	260	260	0	6.6027	5333100	1				141	761	TRUE	776	1458	2882	2882
tr|Q9HW49|Q9HW49_PSEAE	tr|Q9HW49|Q9HW49_PSEAE	2	2	2	>tr|Q9HW49|Q9HW49_PSEAE Uncharacterized protein OS=Pseudomonas aeruginosa (strain ATCC 15692 / PAO1 / 1C / PRS 101 / LMG 12228) GN=PA4352 PE=3 SV=1	1	2	2	2	18.5	18.5	18.5	30.972	286	286	0	15.846	17871000	12				142	118;784	True;True	119;799	217;218;1500;1501	449;450;451;452;2966;2967;2968;2969;2970;2971;2972;2973	452;2972
tr|Q9HW72|Q9HW72_PSEAE	tr|Q9HW72|Q9HW72_PSEAE	2	2	2	>tr|Q9HW72|Q9HW72_PSEAE Pyruvate kinase OS=Pseudomonas aeruginosa (strain ATCC 15692 / PAO1 / 1C / PRS 101 / LMG 12228) GN=pykA PE=3 SV=1	1	2	2	2	7.9	7.9	7.9	52.252	483	483	0	12.305	6223100	2				143	386;841	True;True	394;856	729;730;1606	1406;1407;3160	1407;3160
tr|Q9HWG5|Q9HWG5_PSEAE	tr|Q9HWG5|Q9HWG5_PSEAE	1	1	1	>tr|Q9HWG5|Q9HWG5_PSEAE Pyochelin biosynthetic protein PchG OS=Pseudomonas aeruginosa (strain ATCC 15692 / PAO1 / 1C / PRS 101 / LMG 12228) GN=pchG PE=4 SV=1	1	1	1	1	3.7	3.7	3.7	37.696	349	349	1	-2	19638000	1	+			144	571	TRUE	582	1086	2039	2039	14	1
tr|Q9HWG9|Q9HWG9_PSEAE	tr|Q9HWG9|Q9HWG9_PSEAE	4	4	4	>tr|Q9HWG9|Q9HWG9_PSEAE Flavin-containing monooxygenase OS=Pseudomonas aeruginosa (strain ATCC 15692 / PAO1 / 1C / PRS 101 / LMG 12228) GN=phzS PE=1 SV=1	1	4	4	4	17.4	17.4	17.4	43.644	402	402	0	41.999	24342000	16				145	252;385;517;891	True;True;True;True	257;391;392;393;525;906	449;723;724;725;726;727;728;986;987;1704;1705;1706	907;1397;1398;1399;1400;1401;1402;1403;1404;1405;1863;1864;3365;3366;3367;3368;3369	907;1403;1864;3368	15;16	315;318
tr|Q9HWP8|Q9HWP8_PSEAE	tr|Q9HWP8|Q9HWP8_PSEAE	2	2	2	>tr|Q9HWP8|Q9HWP8_PSEAE Cytochrome c oxidase subunit (Cbb3-type) OS=Pseudomonas aeruginosa (strain ATCC 15692 / PAO1 / 1C / PRS 101 / LMG 12228) GN=PA4133 PE=3 SV=1	1	2	2	2	7.6	7.6	7.6	53.318	475	475	0	10.885	9301400	2				146	106;116	True;True	107;117	197;215	419;447	419;447
tr|Q9HWQ0|Q9HWQ0_PSEAE	tr|Q9HWQ0|Q9HWQ0_PSEAE	5	5	5	>tr|Q9HWQ0|Q9HWQ0_PSEAE Probable iron-sulfur protein OS=Pseudomonas aeruginosa (strain ATCC 15692 / PAO1 / 1C / PRS 101 / LMG 12228) GN=PA4131 PE=4 SV=1	1	5	5	5	12.4	12.4	12.4	63.991	573	573	0	48.311	52303000	15				147	43;201;272;374;501	True;True;True;True;True	43;205;277;380;509	79;80;366;367;482;483;706;707;959;960	172;173;761;762;763;951;952;953;954;1370;1371;1372;1373;1815;1816	172;761;951;1372;1815
tr|Q9HX05|Q9HX05_PSEAE;tr|Q9I2C4|Q9I2C4_PSEAE	tr|Q9HX05|Q9HX05_PSEAE;tr|Q9I2C4|Q9I2C4_PSEAE	4;3	4;3	4;3	>tr|Q9HX05|Q9HX05_PSEAE Probable aldehyde dehydrogenase OS=Pseudomonas aeruginosa (strain ATCC 15692 / PAO1 / 1C / PRS 101 / LMG 12228) GN=PA4022 PE=3 SV=1;>tr|Q9I2C4|Q9I2C4_PSEAE NAD+ dependent aldehyde dehydrogenase ExaC OS=Pseudomonas aeruginosa (strain	2	4	4	4	12.5	12.5	12.5	54.979	506	506;506	0	28.803	17298000	6				148	74;427;877;888	True;True;True;True	75;435;892;903	139;815;1666;1698;1699	308;309;1557;1558;3244;3357;3358	308;1558;3244;3358
tr|Q9HX44|Q9HX44_PSEAE	tr|Q9HX44|Q9HX44_PSEAE	1	1	1	>tr|Q9HX44|Q9HX44_PSEAE Probable acyl-CoA dehydrogenase OS=Pseudomonas aeruginosa (strain ATCC 15692 / PAO1 / 1C / PRS 101 / LMG 12228) GN=PA3972 PE=3 SV=1	1	1	1	1	5.1	5.1	5.1	60.338	549	549	0	6.5552	918860	1				149	801	TRUE	816	1531	3025	3025
tr|Q9HX94|Q9HX94_PSEAE	tr|Q9HX94|Q9HX94_PSEAE	1	1	1	>tr|Q9HX94|Q9HX94_PSEAE Uncharacterized protein OS=Pseudomonas aeruginosa (strain ATCC 15692 / PAO1 / 1C / PRS 101 / LMG 12228) GN=PA3919 PE=4 SV=1	1	1	1	1	1.9	1.9	1.9	51.699	463	463	0	6.5553	0	1				150	351	TRUE	357	619	1201	1201
tr|Q9HY01|Q9HY01_PSEAE	tr|Q9HY01|Q9HY01_PSEAE	2	2	2	>tr|Q9HY01|Q9HY01_PSEAE S-(hydroxymethyl)glutathione dehydrogenase OS=Pseudomonas aeruginosa (strain ATCC 15692 / PAO1 / 1C / PRS 101 / LMG 12228) GN=adhC PE=3 SV=1	1	2	2	2	7	7	7	39.208	370	370	0	13.264	5809200	3				151	190;349	True;True	194;355	349;616	732;1197;1198	732;1198
tr|Q9HY12|Q9HY12_PSEAE	tr|Q9HY12|Q9HY12_PSEAE	1	1	1	>tr|Q9HY12|Q9HY12_PSEAE Uncharacterized protein OS=Pseudomonas aeruginosa (strain ATCC 15692 / PAO1 / 1C / PRS 101 / LMG 12228) GN=PA3614 PE=4 SV=1	1	1	1	1	6	6	6	51.921	467	467	0	5.6037	5522000	2				152	85	TRUE	86	162	350;351	350
tr|Q9HY13|Q9HY13_PSEAE	tr|Q9HY13|Q9HY13_PSEAE	10	10	10	>tr|Q9HY13|Q9HY13_PSEAE Uncharacterized protein OS=Pseudomonas aeruginosa (strain ATCC 15692 / PAO1 / 1C / PRS 101 / LMG 12228) GN=PA3613 PE=4 SV=1	1	10	10	10	18.6	18.6	18.6	88.378	801	801	0	68.256	54762000	20				153	119;422;529;700;703;704;744;788;805;902	True;True;True;True;True;True;True;True;True;True	120;430;538;714;717;718;758;803;820;917	219;220;808;1011;1012;1354;1359;1360;1429;1430;1507;1508;1539;1540;1725	453;454;1549;1910;1911;2650;2651;2657;2658;2659;2837;2838;2839;2840;2984;2985;3044;3045;3046;3395	454;1549;1910;2650;2657;2659;2838;2984;3045;3395
tr|Q9HY79|Q9HY79_PSEAE	tr|Q9HY79|Q9HY79_PSEAE	1	1	1	>tr|Q9HY79|Q9HY79_PSEAE Ferroxidase OS=Pseudomonas aeruginosa (strain ATCC 15692 / PAO1 / 1C / PRS 101 / LMG 12228) GN=bfrB PE=1 SV=1	1	1	1	1	10.8	10.8	10.8	18.553	158	158	0	5.807	5087800	1				154	361	TRUE	367	637	1227	1227
tr|Q9HY81|Q9HY81_PSEAE	tr|Q9HY81|Q9HY81_PSEAE	1	1	1	>tr|Q9HY81|Q9HY81_PSEAE Probable peroxidase OS=Pseudomonas aeruginosa (strain ATCC 15692 / PAO1 / 1C / PRS 101 / LMG 12228) GN=PA3529 PE=1 SV=1	1	1	1	1	5.5	5.5	5.5	21.822	200	200	0	7.5079	12105000	3				155	680	TRUE	694	1315;1316	2527;2528;2529	2527
tr|Q9HYR7|Q9HYR7_PSEAE	tr|Q9HYR7|Q9HYR7_PSEAE	1	1	1	>tr|Q9HYR7|Q9HYR7_PSEAE Probable FAD-dependent monooxygenase OS=Pseudomonas aeruginosa (strain ATCC 15692 / PAO1 / 1C / PRS 101 / LMG 12228) GN=PA3328 PE=4 SV=1	1	1	1	1	4.6	4.6	4.6	42.498	388	388	0	8.3388	15416000	2				156	111	TRUE	112	206;207	437;438	437
tr|Q9HYR8|Q9HYR8_PSEAE	tr|Q9HYR8|Q9HYR8_PSEAE	20	20	20	>tr|Q9HYR8|Q9HYR8_PSEAE Probable non-ribosomal peptide synthetase OS=Pseudomonas aeruginosa (strain ATCC 15692 / PAO1 / 1C / PRS 101 / LMG 12228) GN=PA3327 PE=4 SV=1	1	20	20	20	13.8	13.8	13.8	259.4	2352	2352	0	136.15	154190000	42				157	36;40;70;71;126;169;284;310;409;426;444;603;636;656;679;682;697;727;812;860	True;True;True;True;True;True;True;True;True;True;True;True;True;True;True;True;True;True;True;True	36;40;71;72;127;172;289;316;417;434;452;616;649;669;693;696;711;741;827;875	66;73;74;132;133;134;230;231;311;312;505;551;783;814;843;1188;1240;1273;1274;1314;1318;1346;1402;1403;1404;1405;1551;1552;1634	143;144;153;154;155;156;157;158;159;160;294;295;296;297;298;299;300;301;465;466;670;671;1007;1083;1517;1556;1618;2289;2397;2453;2454;2526;2531;2610;2793;2794;2795;2796;2797;3057;3058;3200	144;157;294;296;465;671;1007;1083;1517;1556;1618;2289;2397;2453;2526;2531;2610;2795;3058;3200
tr|Q9HYT5|Q9HYT5_PSEAE	tr|Q9HYT5|Q9HYT5_PSEAE	4	4	4	>tr|Q9HYT5|Q9HYT5_PSEAE Uncharacterized protein OS=Pseudomonas aeruginosa (strain ATCC 15692 / PAO1 / 1C / PRS 101 / LMG 12228) GN=PA3309 PE=3 SV=1	1	4	4	4	33.1	33.1	33.1	16.496	151	151	0	29.731	64982000	11				158	316;364;481;796	True;True;True;True	322;370;489;811	562;642;643;926;927;1522;1523	1113;1114;1233;1234;1235;1236;1773;1774;1775;3013;3014	1113;1234;1773;3013
tr|Q9HYZ6|Q9HYZ6_PSEAE	tr|Q9HYZ6|Q9HYZ6_PSEAE	3	3	3	>tr|Q9HYZ6|Q9HYZ6_PSEAE Site-determining protein OS=Pseudomonas aeruginosa (strain ATCC 15692 / PAO1 / 1C / PRS 101 / LMG 12228) GN=minD PE=3 SV=1	1	3	3	3	14.8	14.8	14.8	29.635	271	271	0	17.511	9143900	2				159	430;473;753	True;True;True	438;481;768	820;914;1447	1563;1742;2866	1563;1742;2866
tr|Q9HZ78|Q9HZ78_PSEAE	tr|Q9HZ78|Q9HZ78_PSEAE	4	4	4	>tr|Q9HZ78|Q9HZ78_PSEAE LPS biosynthesis protein WbpG OS=Pseudomonas aeruginosa (strain ATCC 15692 / PAO1 / 1C / PRS 101 / LMG 12228) GN=wbpG PE=4 SV=1	1	4	4	4	15.6	15.6	15.6	43.503	377	377	0	26.79	28073000	7				160	24;139;437;894	True;True;True;True	24;142;445;909	47;48;263;831;832;1710	101;102;585;1579;1580;1581;3373	101;585;1581;3373
tr|Q9HZC5|Q9HZC5_PSEAE	tr|Q9HZC5|Q9HZC5_PSEAE	1	1	1	>tr|Q9HZC5|Q9HZC5_PSEAE Aminopeptidase N OS=Pseudomonas aeruginosa (strain ATCC 15692 / PAO1 / 1C / PRS 101 / LMG 12228) GN=pepN PE=4 SV=1	1	1	1	1	1.2	1.2	1.2	100.05	885	885	0	7.492	1097300	2				161	238	TRUE	243	430;431	882;883	883
tr|Q9HZK4|Q9HZK4_PSEAE	tr|Q9HZK4|Q9HZK4_PSEAE	9	9	9	>tr|Q9HZK4|Q9HZK4_PSEAE Glyceraldehyde-3-phosphate dehydrogenase OS=Pseudomonas aeruginosa (strain ATCC 15692 / PAO1 / 1C / PRS 101 / LMG 12228) GN=PA3001 PE=3 SV=1	1	9	9	9	25.2	25.2	25.2	50.111	461	461	0	72.237	89361000	19				162	167;177;438;538;601;647;668;818;828	True;True;True;True;True;True;True;True;True	170;180;446;548;614;660;681;833;843	308;309;324;325;833;834;1030;1185;1257;1258;1292;1563;1585;1586	667;668;694;695;696;697;1582;1583;1962;1963;2283;2424;2425;2426;2475;3074;3114;3115;3116;3117	667;694;1583;1962;2283;2426;2475;3074;3114
tr|Q9HZV6|Q9HZV6_PSEAE	tr|Q9HZV6|Q9HZV6_PSEAE	1	1	1	>tr|Q9HZV6|Q9HZV6_PSEAE Geranyl-CoA carboxylase, alpha-subunit (Biotin-containing) OS=Pseudomonas aeruginosa (strain ATCC 15692 / PAO1 / 1C / PRS 101 / LMG 12228) GN=atuF PE=4 SV=1	1	1	1	1	1.4	1.4	1.4	71.747	661	661	0	6.1373	0	1				163	240	TRUE	245	434	888	888
tr|Q9I028|Q9I028_PSEAE	tr|Q9I028|Q9I028_PSEAE	2	2	2	>tr|Q9I028|Q9I028_PSEAE Probable acyl-CoA dehydrogenase OS=Pseudomonas aeruginosa (strain ATCC 15692 / PAO1 / 1C / PRS 101 / LMG 12228) GN=PA2815 PE=4 SV=1	1	2	2	2	6.3	6.3	6.3	88.762	815	815	0	13.746	8747200	3				164	442;831	True;True	450;846	838;1591	1587;1588;3124	1588;3124
tr|Q9I056|Q9I056_PSEAE	tr|Q9I056|Q9I056_PSEAE	1	1	1	>tr|Q9I056|Q9I056_PSEAE Carboxypeptidase G2 OS=Pseudomonas aeruginosa (strain ATCC 15692 / PAO1 / 1C / PRS 101 / LMG 12228) GN=cpg2 PE=4 SV=1	1	1	1	1	3.4	3.4	3.4	44.007	412	412	0	5.9228	10928000	6				165	534	TRUE	543	1020;1021	1929;1930;1931;1932;1933;1934	1929
tr|Q9I0L4|Q9I0L4_PSEAE	tr|Q9I0L4|Q9I0L4_PSEAE	5	5	5	>tr|Q9I0L4|Q9I0L4_PSEAE Isocitrate dehydrogenase OS=Pseudomonas aeruginosa (strain ATCC 15692 / PAO1 / 1C / PRS 101 / LMG 12228) GN=idh PE=4 SV=1	1	5	5	5	10.1	10.1	10.1	81.633	741	741	0	42.899	25949000	9				166	115;153;261;280;362	True;True;True;True;True	116;156;266;285;368	213;214;283;284;464;498;638;639	445;446;619;620;621;924;993;1228;1229	445;621;924;993;1229
tr|Q9I0L5|Q9I0L5_PSEAE	tr|Q9I0L5|Q9I0L5_PSEAE	10	10	10	>tr|Q9I0L5|Q9I0L5_PSEAE Isocitrate dehydrogenase [NADP] OS=Pseudomonas aeruginosa (strain ATCC 15692 / PAO1 / 1C / PRS 101 / LMG 12228) GN=icd PE=3 SV=1	1	10	10	10	31.6	31.6	31.6	45.577	418	418	0	85.781	173620000	36				167	73;104;154;237;292;317;602;759;823;866	True;True;True;True;True;True;True;True;True;True	74;105;157;242;297;323;615;774;838;881	137;138;194;285;428;429;519;520;563;564;1186;1187;1456;1574;1575;1576;1646;1647	304;305;306;307;410;411;622;623;878;879;880;881;1026;1027;1028;1115;1116;2284;2285;2286;2287;2288;2880;3091;3092;3093;3094;3095;3096;3097;3098;3099;3100;3101;3220;3221	306;410;622;881;1028;1116;2284;2880;3092;3220
tr|Q9I0T1|Q9I0T1_PSEAE	tr|Q9I0T1|Q9I0T1_PSEAE	7	7	7	>tr|Q9I0T1|Q9I0T1_PSEAE Probable acyl-CoA thiolase OS=Pseudomonas aeruginosa (strain ATCC 15692 / PAO1 / 1C / PRS 101 / LMG 12228) GN=PA2553 PE=3 SV=1	1	7	7	7	22.5	22.5	22.5	41.4	396	396	0	56.468	74633000	13				168	152;162;174;391;518;738;739	True;True;True;True;True;True;True	155;165;177;399;526;752;753	281;282;300;301;319;738;739;988;989;1423;1424	617;618;651;652;653;680;1416;1417;1865;1866;1867;2830;2831	618;651;680;1416;1867;2830;2831
tr|Q9I0T2|Q9I0T2_PSEAE	tr|Q9I0T2|Q9I0T2_PSEAE	1	1	1	>tr|Q9I0T2|Q9I0T2_PSEAE Probable acyl-CoA dehydrogenase OS=Pseudomonas aeruginosa (strain ATCC 15692 / PAO1 / 1C / PRS 101 / LMG 12228) GN=PA2552 PE=3 SV=1	1	1	1	1	3.2	3.2	3.2	40.908	375	375	0	6.7661	2291300	1				169	342	TRUE	348	604	1182	1182
tr|Q9I1H3|Q9I1H3_PSEAE	tr|Q9I1H3|Q9I1H3_PSEAE	5	5	5	>tr|Q9I1H3|Q9I1H3_PSEAE AmbE OS=Pseudomonas aeruginosa (strain ATCC 15692 / PAO1 / 1C / PRS 101 / LMG 12228) GN=ambE PE=4 SV=1	1	5	5	5	4	4	4	229.04	2124	2124	0	33.113	16420000	8				170	0;65;474;760;774	True;True;True;True;True	0;66;482;775;789	0;1;124;915;1457;1484	0;1;2;3;4;278;1743;2881;2945	1;278;1743;2881;2945
tr|Q9I1N7|Q9I1N7_PSEAE	tr|Q9I1N7|Q9I1N7_PSEAE	2	2	2	>tr|Q9I1N7|Q9I1N7_PSEAE PslB OS=Pseudomonas aeruginosa (strain ATCC 15692 / PAO1 / 1C / PRS 101 / LMG 12228) GN=pslB PE=3 SV=1	1	2	2	2	9.4	9.4	9.4	53.515	488	488	0	12.518	14867000	3				171	198;606	True;True	202;619	361;362;1192	754;755;2297	754;2297
tr|Q9I1Z6|Q9I1Z6_PSEAE	tr|Q9I1Z6|Q9I1Z6_PSEAE	4	4	4	>tr|Q9I1Z6|Q9I1Z6_PSEAE Alcohol dehydrogenase (Zn-dependent) OS=Pseudomonas aeruginosa (strain ATCC 15692 / PAO1 / 1C / PRS 101 / LMG 12228) GN=PA2119 PE=3 SV=1	1	4	4	4	21	21	21	38.561	366	366	0	23.61	51792000	6				172	333;455;472;810	True;True;True;True	339;463;480;825	591;873;913;1547;1548	1165;1166;1673;1741;3053;3054	1165;1673;1741;3054
tr|Q9I246|Q9I246_PSEAE	tr|Q9I246|Q9I246_PSEAE	8	8	8	>tr|Q9I246|Q9I246_PSEAE Probable carbamoyl transferase OS=Pseudomonas aeruginosa (strain ATCC 15692 / PAO1 / 1C / PRS 101 / LMG 12228) GN=PA2069 PE=4 SV=1	1	8	8	8	19.7	19.7	19.7	63.382	574	574	0	56.53	47995000	16				173	130;208;318;383;477;637;645;663	True;True;True;True;True;True;True;True	131;212;324;389;485;650;658;676	240;377;565;566;720;721;919;1241;1252;1253;1254;1255;1282;1283	498;780;1117;1118;1394;1395;1751;2398;2415;2416;2417;2418;2419;2420;2421;2422;2464;2465	498;780;1118;1394;1751;2398;2415;2464
tr|Q9I297|Q9I297_PSEAE	tr|Q9I297|Q9I297_PSEAE	1	1	1	>tr|Q9I297|Q9I297_PSEAE Methylcrotonyl-CoA carboxylase, beta-subunit OS=Pseudomonas aeruginosa (strain ATCC 15692 / PAO1 / 1C / PRS 101 / LMG 12228) GN=liuB PE=1 SV=1	1	1	1	1	3.4	3.4	3.4	57.433	535	535	0	8.2034	2168000	1				174	276	TRUE	281	491	972	972
tr|Q9I299|Q9I299_PSEAE	tr|Q9I299|Q9I299_PSEAE	11	11	11	>tr|Q9I299|Q9I299_PSEAE Methylcrotonyl-CoA carboxylase, alpha-subunit (Biotin-containing) OS=Pseudomonas aeruginosa (strain ATCC 15692 / PAO1 / 1C / PRS 101 / LMG 12228) GN=liuD PE=1 SV=1	1	11	11	11	23.8	23.8	23.8	71.282	655	655	0	74.51	68385000	16				175	62;67;156;346;348;360;421;458;469;849;850	True;True;True;True;True;True;True;True;True;True;True	63;68;159;352;354;366;429;466;477;864;865	119;127;128;287;288;611;612;615;636;807;877;908;1620;1621	265;286;287;288;626;627;1191;1192;1196;1226;1548;1678;1735;3177;3178;3179	265;288;626;1192;1196;1226;1548;1678;1735;3177;3178
tr|Q9I2A9|Q9I2A9_PSEAE	tr|Q9I2A9|Q9I2A9_PSEAE	1	1	1	>tr|Q9I2A9|Q9I2A9_PSEAE DhcB, dehydrocarnitine CoA transferase, subunit B OS=Pseudomonas aeruginosa (strain ATCC 15692 / PAO1 / 1C / PRS 101 / LMG 12228) GN=dhcB PE=4 SV=1	1	1	1	1	11	11	11	23.187	218	218	0	7.5046	4081900	5				176	289	TRUE	294	514;515	1018;1019;1020;1021;1022	1019
tr|Q9I2T9|Q9I2T9_PSEAE	tr|Q9I2T9|Q9I2T9_PSEAE	1	1	1	>tr|Q9I2T9|Q9I2T9_PSEAE Lon protease OS=Pseudomonas aeruginosa (strain ATCC 15692 / PAO1 / 1C / PRS 101 / LMG 12228) GN=lon PE=2 SV=1	1	1	1	1	2.5	2.5	2.5	88.646	798	798	0	8.7177	578540	1				177	722	TRUE	736	1394	2784	2784
tr|Q9I2W9|Q9I2W9_PSEAE	tr|Q9I2W9|Q9I2W9_PSEAE	3	3	3	>tr|Q9I2W9|Q9I2W9_PSEAE Phosphoenolpyruvate synthase OS=Pseudomonas aeruginosa (strain ATCC 15692 / PAO1 / 1C / PRS 101 / LMG 12228) GN=ppsA PE=3 SV=1	1	3	3	3	6.1	6.1	6.1	85.816	791	791	0	25.722	17002000	4				178	29;216;729	True;True;True	29;220;743	55;390;391;1407	114;814;815;2799	114;814;2799
tr|Q9I3B2|Q9I3B2_PSEAE	tr|Q9I3B2|Q9I3B2_PSEAE	3	3	3	>tr|Q9I3B2|Q9I3B2_PSEAE Beta-ketoacyl-ACP synthase I OS=Pseudomonas aeruginosa (strain ATCC 15692 / PAO1 / 1C / PRS 101 / LMG 12228) GN=fabB PE=3 SV=1	1	3	3	3	9.4	9.4	9.4	42.806	405	405	0	22.688	28718000	8				179	147;210;233	True;True;True	150;214;237	274;275;379;414;415	605;606;607;608;782;849;850;851	607;782;849
tr|Q9I3D3|Q9I3D3_PSEAE	tr|Q9I3D3|Q9I3D3_PSEAE	13	13	13	>tr|Q9I3D3|Q9I3D3_PSEAE 2-oxoglutarate dehydrogenase (E1 subunit) OS=Pseudomonas aeruginosa (strain ATCC 15692 / PAO1 / 1C / PRS 101 / LMG 12228) GN=sucA PE=4 SV=1	1	13	13	13	20.9	20.9	20.9	105.88	943	943	0	106.09	143140000	46				180	129;133;199;223;287;326;335;491;492;510;537;558;683	True;True;True;True;True;True;True;True;True;True;True;True;True	130;134;203;227;292;332;341;499;500;518;546;547;569;697	238;239;244;363;364;401;510;511;576;577;593;942;943;944;945;977;1026;1027;1028;1029;1062;1063;1319	494;495;496;497;510;756;757;758;759;826;1014;1015;1130;1131;1168;1794;1795;1796;1797;1798;1799;1846;1943;1944;1945;1946;1947;1948;1949;1950;1951;1952;1953;1954;1955;1956;1957;1958;1959;1960;1961;2012;2013;2014;2015;2532	496;510;756;826;1015;1130;1168;1794;1799;1846;1950;2012;2532	17	592
tr|Q9I3D4|Q9I3D4_PSEAE	tr|Q9I3D4|Q9I3D4_PSEAE	5	5	5	>tr|Q9I3D4|Q9I3D4_PSEAE Succinate dehydrogenase (B subunit) OS=Pseudomonas aeruginosa (strain ATCC 15692 / PAO1 / 1C / PRS 101 / LMG 12228) GN=sdhB PE=4 SV=1	1	5	5	5	26	26	26	26.155	235	235	0	39.221	76006000	16				181	227;417;523;561;799	True;True;True;True;True	231;425;532;572;814	406;407;799;800;1000;1001;1067;1068;1527;1528	835;836;837;838;839;840;841;1538;1539;1540;1894;1895;2019;2020;3021;3022	839;1538;1895;2020;3021
tr|Q9I3D5|Q9I3D5_PSEAE	tr|Q9I3D5|Q9I3D5_PSEAE	13	13	13	>tr|Q9I3D5|Q9I3D5_PSEAE Succinate dehydrogenase flavoprotein subunit OS=Pseudomonas aeruginosa (strain ATCC 15692 / PAO1 / 1C / PRS 101 / LMG 12228) GN=sdhA PE=3 SV=1	1	13	13	13	26.4	26.4	26.4	63.531	590	590	0	124.98	423680000	65				182	211;243;244;249;269;330;331;367;392;393;449;591;746	True;True;True;True;True;True;True;True;True;True;True;True;True	215;248;249;254;274;336;337;373;400;401;457;604;761	380;437;438;439;445;446;477;478;583;584;585;586;587;588;648;740;741;742;743;853;854;855;856;857;858;859;860;861;862;863;864;1168;1434;1435	783;891;892;893;903;904;943;944;945;946;1140;1141;1142;1143;1144;1145;1146;1147;1148;1149;1150;1151;1152;1153;1154;1155;1156;1157;1158;1249;1418;1419;1420;1421;1422;1423;1424;1425;1426;1427;1428;1636;1637;1638;1639;1640;1641;1642;1643;1644;1645;1646;1647;1648;1649;1650;1651;1652;1653;1654;1655;1656;2254;2844;2845	783;891;893;903;943;1140;1146;1249;1419;1426;1636;2254;2844
tr|Q9I3G0|Q9I3G0_PSEAE	tr|Q9I3G0|Q9I3G0_PSEAE	2	2	2	>tr|Q9I3G0|Q9I3G0_PSEAE Cytochrome c oxidase, cbb3-type, CcoN subunit OS=Pseudomonas aeruginosa (strain ATCC 15692 / PAO1 / 1C / PRS 101 / LMG 12228) GN=ccoN2 PE=3 SV=1	1	2	2	2	6.1	6.1	6.1	53.09	475	475	0	14.125	28054000	11				183	687;758	True;True	701;773	1327;1328;1454;1455	2574;2575;2576;2577;2578;2874;2875;2876;2877;2878;2879	2574;2875
tr|Q9I3G1|Q9I3G1_PSEAE	tr|Q9I3G1|Q9I3G1_PSEAE	1	1	1	>tr|Q9I3G1|Q9I3G1_PSEAE Cytochrome c oxidase, cbb3-type, CcoO subunit OS=Pseudomonas aeruginosa (strain ATCC 15692 / PAO1 / 1C / PRS 101 / LMG 12228) GN=ccoO2 PE=4 SV=1	1	1	1	1	8.9	8.9	8.9	22.778	202	202	0	23.784	17075000	4				184	714	TRUE	728	1378;1379	2695;2696;2697;2698	2695
tr|Q9I3G2|Q9I3G2_PSEAE	tr|Q9I3G2|Q9I3G2_PSEAE	4	4	4	>tr|Q9I3G2|Q9I3G2_PSEAE Cbb3-type cytochrome c oxidase subunit OS=Pseudomonas aeruginosa (strain ATCC 15692 / PAO1 / 1C / PRS 101 / LMG 12228) GN=ccoP2 PE=3 SV=1	1	4	4	4	17.5	17.5	17.5	33.812	308	308	0	24.58	41293000	8				185	302;713;867;873	True;True;True;True	308;727;882;888	537;538;1376;1377;1648;1658;1659	1062;1063;1064;2693;2694;3222;3234;3235;3236	1064;2694;3222;3234
tr|Q9I3G3|Q9I3G3_PSEAE	tr|Q9I3G3|Q9I3G3_PSEAE	1	1	1	>tr|Q9I3G3|Q9I3G3_PSEAE Cytochrome c oxidase, cbb3-type, CcoN subunit OS=Pseudomonas aeruginosa (strain ATCC 15692 / PAO1 / 1C / PRS 101 / LMG 12228) GN=ccoN1 PE=3 SV=1	1	1	1	1	2.9	2.9	2.9	53.108	475	475	0	5.843	7320000	5				186	5	TRUE	5	9;10	17;18;19;20;21	17
tr|Q9I3G6|Q9I3G6_PSEAE	tr|Q9I3G6|Q9I3G6_PSEAE	1	1	1	>tr|Q9I3G6|Q9I3G6_PSEAE Probable ferredoxin OS=Pseudomonas aeruginosa (strain ATCC 15692 / PAO1 / 1C / PRS 101 / LMG 12228) GN=PA1551 PE=4 SV=1	1	1	1	1	1.7	1.7	1.7	53.62	471	471	0.0099502	5.542	2338800	1				187	334	TRUE	340	592	1167	1167
tr|Q9I3X2|Q9I3X2_PSEAE	tr|Q9I3X2|Q9I3X2_PSEAE	2	2	2	>tr|Q9I3X2|Q9I3X2_PSEAE Uncharacterized protein OS=Pseudomonas aeruginosa (strain ATCC 15692 / PAO1 / 1C / PRS 101 / LMG 12228) GN=PA1372 PE=4 SV=1	1	2	2	2	4.5	4.5	4.5	79.82	711	711	0	25.772	15333000	5				188	387;595	True;True	395;608	731;732;1175;1176	1408;1409;2262;2263;2264	1409;2264
tr|Q9I4I1|Q9I4I1_PSEAE	tr|Q9I4I1|Q9I4I1_PSEAE	5	5	5	>tr|Q9I4I1|Q9I4I1_PSEAE Ribonucleoside-diphosphate reductase OS=Pseudomonas aeruginosa (strain ATCC 15692 / PAO1 / 1C / PRS 101 / LMG 12228) GN=nrdA PE=3 SV=1	1	5	5	5	8.3	8.3	8.3	107.11	963	963	0	37.083	17576000	11				189	20;31;579;857;911	True;True;True;True;True	20;31;592;872;926	39;40;58;1112;1113;1629;1630;1739;1740	90;91;92;117;2111;2112;2113;3195;3196;3436;3437	92;117;2111;3195;3436
tr|Q9I4X1|Q9I4X1_PSEAE	tr|Q9I4X1|Q9I4X1_PSEAE	3	3	3	>tr|Q9I4X1|Q9I4X1_PSEAE PqsC OS=Pseudomonas aeruginosa (strain ATCC 15692 / PAO1 / 1C / PRS 101 / LMG 12228) GN=pqsC PE=1 SV=1	1	3	3	3	12.9	12.9	12.9	38.238	348	348	0	19.936	43423000	9				190	38;494;588	True;True;True	38;502;601	69;70;947;948;1162;1163	147;148;149;150;1801;1802;1803;2244;2245	150;1801;2244
tr|Q9I5F6|Q9I5F6_PSEAE	tr|Q9I5F6|Q9I5F6_PSEAE	9	9	9	>tr|Q9I5F6|Q9I5F6_PSEAE Bifunctional protein PutA OS=Pseudomonas aeruginosa (strain ATCC 15692 / PAO1 / 1C / PRS 101 / LMG 12228) GN=putA PE=3 SV=1	1	9	9	9	11.6	11.6	11.6	115.63	1060	1060	0	85.477	48150000	22				191	125;407;522;605;813;819;829;838;872	True;True;True;True;True;True;True;True;True	126;415;531;618;828;834;844;853;887	228;229;780;998;999;1191;1553;1554;1564;1565;1566;1587;1588;1602;1656;1657	463;464;1513;1892;1893;2295;2296;3059;3060;3061;3062;3075;3076;3077;3078;3118;3119;3120;3155;3156;3232;3233	464;1513;1893;2296;3062;3077;3119;3155;3233
tr|Q9I5U9|Q9I5U9_PSEAE	tr|Q9I5U9|Q9I5U9_PSEAE	13	13	13	>tr|Q9I5U9|Q9I5U9_PSEAE Uncharacterized protein OS=Pseudomonas aeruginosa (strain ATCC 15692 / PAO1 / 1C / PRS 101 / LMG 12228) GN=PA0588 PE=4 SV=1	1	13	13	13	25.6	25.6	25.6	73.722	640	640	0	118.32	232000000	44				192	82;146;468;475;479;486;536;547;562;586;715;825;862	True;True;True;True;True;True;True;True;True;True;True;True;True	83;149;476;483;487;494;545;557;573;599;729;840;877	155;156;157;272;273;904;905;906;907;916;917;921;922;935;936;1024;1025;1043;1044;1069;1070;1158;1159;1380;1381;1579;1580;1637;1638;1639	337;338;339;602;603;604;1729;1730;1731;1732;1733;1734;1744;1745;1746;1747;1748;1755;1756;1757;1758;1785;1786;1937;1938;1939;1940;1941;1942;1982;1983;2021;2022;2240;2241;2699;2700;2701;2702;3106;3107;3206;3207;3208	338;604;1730;1748;1758;1785;1937;1983;2022;2240;2701;3107;3206
tr|Q9I641|Q9I641_PSEAE	tr|Q9I641|Q9I641_PSEAE	1	1	1	>tr|Q9I641|Q9I641_PSEAE Probable transcriptional regulator OS=Pseudomonas aeruginosa (strain ATCC 15692 / PAO1 / 1C / PRS 101 / LMG 12228) GN=PA0477 PE=1 SV=1	1	1	1	1	2.3	2.3	2.3	34.054	308	308	0	5.6092	0	1				193	526	TRUE	535	1006	1902	1902
tr|Q9I659|Q9I659_PSEAE	tr|Q9I659|Q9I659_PSEAE	2	2	1	>tr|Q9I659|Q9I659_PSEAE Probable ClpA/B protease ATP binding subunit OS=Pseudomonas aeruginosa (strain ATCC 15692 / PAO1 / 1C / PRS 101 / LMG 12228) GN=PA0459 PE=4 SV=1	1	2	2	1	2.7	2.7	1.5	94.174	850	850	0	16.586	4343500	4				194	582;701	True;True	595;715	1150;1151;1355;1356	2228;2229;2652;2653	2228;2653
tr|Q9I672|Q9I672_PSEAE	tr|Q9I672|Q9I672_PSEAE	1	1	1	>tr|Q9I672|Q9I672_PSEAE Uncharacterized protein OS=Pseudomonas aeruginosa (strain ATCC 15692 / PAO1 / 1C / PRS 101 / LMG 12228) GN=PA0446 PE=4 SV=1	1	1	1	1	6.1	6.1	6.1	43.846	407	407	0	8.0676	1898800	3				195	792	TRUE	807	1515	3001;3002;3003	3001
tr|Q9I687|Q9I687_PSEAE	tr|Q9I687|Q9I687_PSEAE	2	2	2	>tr|Q9I687|Q9I687_PSEAE Methylenetetrahydrofolate reductase OS=Pseudomonas aeruginosa (strain ATCC 15692 / PAO1 / 1C / PRS 101 / LMG 12228) GN=metF PE=3 SV=1	1	2	2	2	10.3	10.3	10.3	32.228	290	290	0	12.524	9839500	2				196	456;659	True;True	464;672	874;1277	1674;1675;2457	1674;2457
tr|Q9I689|Q9I689_PSEAE	tr|Q9I689|Q9I689_PSEAE	1	1	1	>tr|Q9I689|Q9I689_PSEAE ATP-dependent RNA helicase RhlE OS=Pseudomonas aeruginosa (strain ATCC 15692 / PAO1 / 1C / PRS 101 / LMG 12228) GN=rhlE PE=3 SV=1	1	1	1	1	3.8	3.8	3.8	70.111	639	639	0.0050505	5.5794	344390	3				197	123	TRUE	124	225;226	459;460;461	460
tr|Q9I6A0|Q9I6A0_PSEAE	tr|Q9I6A0|Q9I6A0_PSEAE	2	2	2	>tr|Q9I6A0|Q9I6A0_PSEAE Probable cystathionine gamma-lyase OS=Pseudomonas aeruginosa (strain ATCC 15692 / PAO1 / 1C / PRS 101 / LMG 12228) GN=PA0400 PE=3 SV=1	1	2	2	2	10.9	10.9	10.9	42.786	394	394	0	11.569	1576900	1				198	448;509	True;True	456;517	852;975;976	1635;1844;1845	1635;1844
tr|Q9I6H5|Q9I6H5_PSEAE	tr|Q9I6H5|Q9I6H5_PSEAE	5	5	5	>tr|Q9I6H5|Q9I6H5_PSEAE D-3-phosphoglycerate dehydrogenase OS=Pseudomonas aeruginosa (strain ATCC 15692 / PAO1 / 1C / PRS 101 / LMG 12228) GN=serA PE=3 SV=1	1	5	5	5	19.3	19.3	19.3	44.216	409	409	0	36.069	22322000	11				199	4;229;271;688;905	True;True;True;True;True	4;233;276;702;920	7;8;409;481;1329;1330;1730	15;16;844;949;950;2579;2580;2581;2582;2583;3402	16;844;949;2581;3402
tr|Q9I6J2|Q9I6J2_PSEAE	tr|Q9I6J2|Q9I6J2_PSEAE	2	2	2	>tr|Q9I6J2|Q9I6J2_PSEAE Putrescine aminotransferase OS=Pseudomonas aeruginosa (strain ATCC 15692 / PAO1 / 1C / PRS 101 / LMG 12228) GN=spuC PE=3 SV=1	1	2	2	2	7.7	7.7	7.7	50.452	456	456	0	10.912	4976900	1				200	197;871	True;True	201;886	360;1655	753;3231	753;3231
tr|Q9I6Z3|Q9I6Z3_PSEAE	tr|Q9I6Z3|Q9I6Z3_PSEAE	3	3	3	>tr|Q9I6Z3|Q9I6Z3_PSEAE Alkyl hydroperoxide reductase subunit C OS=Pseudomonas aeruginosa (strain ATCC 15692 / PAO1 / 1C / PRS 101 / LMG 12228) GN=ahpC PE=4 SV=1	1	3	3	3	26.7	26.7	26.7	20.541	187	187	0	16.432	20249000	4				201	91;224;756	True;True;True	92;228;771	171;402;1450;1451	366;367;368;827;2869;2870	367;827;2870
tr|Q9I748|Q9I748_PSEAE	tr|Q9I748|Q9I748_PSEAE	3	3	3	>tr|Q9I748|Q9I748_PSEAE Uncharacterized protein OS=Pseudomonas aeruginosa (strain ATCC 15692 / PAO1 / 1C / PRS 101 / LMG 12228) GN=PA0084 PE=4 SV=1	1	3	3	3	6.2	6.2	6.2	55.771	498	498	0	23.901	30811000	6				202	340;669;893	True;True;True	346;682;908	600;601;1293;1294;1708;1709	1178;1179;2476;2477;3371;3372	1178;2477;3372
tr|Q9I762|Q9I762_PSEAE	tr|Q9I762|Q9I762_PSEAE	1	1	1	>tr|Q9I762|Q9I762_PSEAE Uncharacterized protein OS=Pseudomonas aeruginosa (strain ATCC 15692 / PAO1 / 1C / PRS 101 / LMG 12228) GN=PA0070 PE=4 SV=1	1	1	1	1	3.3	3.3	3.3	31.716	304	304	0.0050251	5.564	0	2				203	345	TRUE	351	609;610	1189;1190	1190

## Sheet: 5-2 proteinGroups Probe 12
Protein IDs	Majority protein IDs	Peptide counts (all)	Peptide counts (razor+unique)	Peptide counts (unique)	Fasta headers	Number of proteins	Peptides	Razor + unique peptides	Unique peptides	Sequence coverage [%]	Unique + razor sequence coverage [%]	Unique sequence coverage [%]	Mol. weight [kDa]	Sequence length	Sequence lengths	Q-value	Score	Intensity	MS/MS Count	Only identified by site	Reverse	Potential contaminant	id	Peptide IDs	Peptide is razor	Mod. peptide IDs	Evidence IDs	MS/MS IDs	Best MS/MS	Oxidation (M) site IDs	Oxidation (M) site positions
CON__P00761	CON__P00761	4	4	4	>P00761 SWISS-PROT:P00761|TRYP_PIG Trypsin - Sus scrofa (Pig).	1	4	4	4	25.1	25.1	25.1	24.409	231	231	0	56.715	1112800000	39			+	0	426;532;607;910	True;True;True;True	434;542;617;926	731;732;733;734;930;1062;1063;1622;1623;1624;1625	1353;1354;1355;1356;1357;1358;1359;1360;1758;1759;1760;1761;1762;1763;1987;1988;1989;1990;1991;1992;1993;3135;3136;3137;3138;3139;3140;3141;3142;3143;3144;3145;3146;3147;3148;3149;3150;3151;3152	1357;1761;1991;3137
CON__P04264;CON__P35908;CON__Q9R0H5;CON__Q6NXH9;CON__Q8BGZ7;CON__P50446;CON__Q6IFZ6;CON__Q7Z794;CON__Q922U2;CON__Q5XQN5;CON__ENSEMBL:ENSBTAP00000038253	CON__P04264	5;2;1;1;1;1;1;1;1;1;1	5;2;1;1;1;1;1;1;1;1;1	5;2;1;1;1;1;1;1;1;1;1	>P04264 SWISS-PROT:P04264 Tax_Id=9606 Gene_Symbol=KRT1 Keratin, type II cytoskeletal 1	11	5	5	5	11.3	11.3	11.3	66.017	644	644;645;524;539;551;553;572;578;580;601;606	0	54.888	83108000	16			+	1	277;322;401;792;1039	True;True;True;True;True	282;328;408;806;1055	481;482;554;555;690;1403;1404;1858	928;929;930;931;932;933;934;1045;1046;1047;1048;1301;2670;2671;2672;3595	934;1046;1301;2672;3595
CON__P13645;CON__P02535-1	CON__P13645;CON__P02535-1	2;1	2;1	2;1	>P13645 SWISS-PROT:P13645 Tax_Id=9606 Gene_Symbol=KRT10 Keratin, type I cytoskeletal 10;>P02535-1 SWISS-PROT:P02535-1 Tax_Id=10090 Gene_Symbol=Krt10 Isoform 1 of Keratin, type I cytoskeletal 10	2	2	2	2	3.5	3.5	3.5	59.51	593	593;570	0	12.861	5770300	3			+	2	520;810	True;True	530;825	910;911;1433	1731;1732;2724	1732;2724
CON__Streptavidin	CON__Streptavidin	7	7	7	>Streptavidin (S.avidinii)	1	7	7	7	49.4	49.4	49.4	16.622	160	160	0	126.25	1697900000	316			+	3	456;457;690;814;1037;1038;1065	True;True;True;True;True;True;True	464;465;704;829;1053;1054;1081	779;780;781;782;783;784;785;786;787;788;789;790;791;792;793;794;795;1217;1218;1219;1220;1221;1222;1223;1224;1225;1226;1227;1228;1229;1230;1231;1232;1233;1234;1235;1438;1439;1440;1441;1442;1838;1839;1840;1841;1842;1843;1844;1845;1846;1847;1848;1849;1850;1851;1852;1853;1854;1855;1856;1857;1900;1901	1432;1433;1434;1435;1436;1437;1438;1439;1440;1441;1442;1443;1444;1445;1446;1447;1448;1449;1450;1451;1452;1453;1454;1455;1456;1457;1458;1459;1460;1461;1462;1463;1464;1465;1466;1467;1468;1469;1470;1471;1472;1473;1474;1475;1476;1477;1478;1479;1480;1481;1482;1483;1484;1485;1486;1487;1488;1489;1490;1491;1492;1493;1494;1495;1496;1497;1498;1499;1500;1501;1502;1503;1504;1505;1506;1507;1508;1509;1510;1511…	1460;1535;2375;2740;3528;3592;3678
REV__sp|P14165|CISY_PSEAE	REV__sp|P14165|CISY_PSEAE	1	1	1	>sp|P14165|CISY_PSEAE Citrate synthase OS=Pseudomonas aeruginosa (strain ATCC 15692 / PAO1 / 1C / PRS 101 / LMG 12228) GN=gltA PE=3 SV=2	1	1	1	1	0	0	0	47.694	428	428	0.0090909	5.7727	180110000	2		+		4	770	TRUE	784	1366;1367	2616;2617	2616
REV__tr|Q9HXW2|Q9HXW2_PSEAE	REV__tr|Q9HXW2|Q9HXW2_PSEAE	1	1	1	>tr|Q9HXW2|Q9HXW2_PSEAE Probable transcriptional regulator OS=Pseudomonas aeruginosa (strain ATCC 15692 / PAO1 / 1C / PRS 101 / LMG 12228) GN=PA3678 PE=4 SV=1	1	1	1	1	0	0	0	23.15	212	212	0.0046512	5.9001	112190000	9		+		5	493	TRUE	503	865	1669;1670;1671;1672;1673;1674;1675;1676;1677	1674
sp|G3XD12|HCNC_PSEAE	sp|G3XD12|HCNC_PSEAE	1	1	1	>sp|G3XD12|HCNC_PSEAE Hydrogen cyanide synthase subunit HcnC OS=Pseudomonas aeruginosa (strain ATCC 15692 / PAO1 / 1C / PRS 101 / LMG 12228) GN=hcnC PE=1 SV=1	1	1	1	1	4.8	4.8	4.8	45.281	417	417	0	6.8954	2817100	3				6	868	TRUE	883	1547;1548	2992;2993;2994	2992
sp|G3XD23|WBPB_PSEAE	sp|G3XD23|WBPB_PSEAE	5	5	5	>sp|G3XD23|WBPB_PSEAE UDP-N-acetyl-2-amino-2-deoxy-D-glucuronate oxidase OS=Pseudomonas aeruginosa (strain ATCC 15692 / PAO1 / 1C / PRS 101 / LMG 12228) GN=wbpB PE=1 SV=1	1	5	5	5	20.3	20.3	20.3	35.717	316	316	0	37.274	79788000	16				7	3;641;698;724;767	True;True;True;True;True	3;652;712;738;781	5;6;1120;1121;1249;1250;1295;1360;1361	7;8;9;10;11;2115;2116;2117;2403;2404;2487;2603;2604;2605;2606;2607	9;2115;2403;2487;2604
sp|G3XD61|WBPI_PSEAE	sp|G3XD61|WBPI_PSEAE	7	7	7	>sp|G3XD61|WBPI_PSEAE UDP-2,3-diacetamido-2,3-dideoxy-D-glucuronate 2-epimerase OS=Pseudomonas aeruginosa (strain ATCC 15692 / PAO1 / 1C / PRS 101 / LMG 12228) GN=wbpI PE=1 SV=1	1	7	7	7	31.4	31.4	31.4	38.907	354	354	0	81.233	114360000	19				8	132;447;476;665;780;858;962	True;True;True;True;True;True;True	133;455;486;677;794;873;978	222;223;763;826;1165;1166;1383;1384;1531;1532;1713;1714	432;433;434;1398;1587;1588;2212;2213;2214;2647;2648;2649;2973;2974;2975;3304;3305;3306;3307	434;1398;1588;2212;2648;2975;3306
sp|G3XD94|UGND_PSEAE	sp|G3XD94|UGND_PSEAE	7	7	7	>sp|G3XD94|UGND_PSEAE UDP-N-acetyl-D-glucosamine 6-dehydrogenase OS=Pseudomonas aeruginosa (strain ATCC 15692 / PAO1 / 1C / PRS 101 / LMG 12228) GN=wbpA PE=1 SV=1	1	7	7	7	21.1	21.1	21.1	48.155	436	436	0	44.558	30268000	10				9	123;144;206;244;660;732;978	True;True;True;True;True;True;True	124;145;210;249;672;746;994	208;241;357;424;425;1157;1306;1745	408;458;717;837;838;839;840;2197;2510;3364	408;458;717;840;2197;2510;3364
sp|O30508|ARUC_PSEAE	sp|O30508|ARUC_PSEAE	2	2	2	>sp|O30508|ARUC_PSEAE Succinylornithine transaminase/acetylornithine aminotransferase OS=Pseudomonas aeruginosa (strain ATCC 15692 / PAO1 / 1C / PRS 101 / LMG 12228) GN=aruC PE=1 SV=2	1	2	2	2	8.6	8.6	8.6	43.747	406	406	0	25.064	12416000	4				10	793;918	True;True	807;934	1405;1635;1636	2673;3168;3169;3170;3171	2673;3170
sp|O52759|RS4_PSEAE	sp|O52759|RS4_PSEAE	5	5	5	>sp|O52759|RS4_PSEAE 30S ribosomal protein S4 OS=Pseudomonas aeruginosa (strain ATCC 15692 / PAO1 / 1C / PRS 101 / LMG 12228) GN=rpsD PE=3 SV=2	1	5	5	5	24.8	24.8	24.8	23.277	206	206	0	50.602	101420000	18				11	66;480;516;604;916	True;True;True;True;True	67;490;526;614;932	117;118;833;903;1056;1057;1632	252;253;254;255;256;257;258;1600;1724;1972;1973;1974;1975;1976;1977;1978;3164;3165	257;1600;1724;1973;3164
sp|O52760|RPOA_PSEAE	sp|O52760|RPOA_PSEAE	7	7	7	>sp|O52760|RPOA_PSEAE DNA-directed RNA polymerase subunit alpha OS=Pseudomonas aeruginosa (strain ATCC 15692 / PAO1 / 1C / PRS 101 / LMG 12228) GN=rpoA PE=3 SV=2	1	7	7	7	22.8	22.8	22.8	36.649	333	333	0	48.908	37014000	14				12	25;377;598;677;799;843;990	True;True;True;True;True;True;True	25;384;608;689;813;858;1006	49;653;1047;1048;1185;1186;1412;1413;1498;1766	99;100;1242;1961;1962;1963;1964;2240;2241;2242;2681;2682;2880;3406	100;1242;1963;2241;2681;2880;3406
sp|O52761|RL17_PSEAE	sp|O52761|RL17_PSEAE	1	1	1	>sp|O52761|RL17_PSEAE 50S ribosomal protein L17 OS=Pseudomonas aeruginosa (strain ATCC 15692 / PAO1 / 1C / PRS 101 / LMG 12228) GN=rplQ PE=3 SV=1	1	1	1	1	13.2	13.2	13.2	14.504	129	129	0.009009	5.7208	7334000	1				13	98	TRUE	99	164	335	335
sp|O52762|CATA_PSEAE	sp|O52762|CATA_PSEAE	5	5	5	>sp|O52762|CATA_PSEAE Catalase OS=Pseudomonas aeruginosa (strain ATCC 15692 / PAO1 / 1C / PRS 101 / LMG 12228) GN=katA PE=1 SV=1	1	5	5	5	14.9	14.9	14.9	55.588	482	482	0	51.834	41406000	7				14	353;355;524;617;687	True;True;True;True;True	359;361;534;627;701	610;611;613;916;917;1077;1213	1150;1151;1154;1155;1737;1738;2012;2310	1150;1155;1738;2012;2310
sp|O54439|ACP1_PSEAE	sp|O54439|ACP1_PSEAE	2	2	2	>sp|O54439|ACP1_PSEAE Acyl carrier protein 1 OS=Pseudomonas aeruginosa (strain ATCC 15692 / PAO1 / 1C / PRS 101 / LMG 12228) GN=acpP1 PE=3 SV=4	1	2	2	2	32.1	32.1	32.1	8.7406	78	78	0	20.263	44435000	4				15	471;472	True;True	481;482	818;819;820	1576;1577;1578;1579	1576;1579
sp|O68822|AMPA_PSEAE	sp|O68822|AMPA_PSEAE	13	13	13	>sp|O68822|AMPA_PSEAE Cytosol aminopeptidase OS=Pseudomonas aeruginosa (strain ATCC 15692 / PAO1 / 1C / PRS 101 / LMG 12228) GN=pepA PE=3 SV=1	1	13	13	13	36.8	36.8	36.8	52.331	495	495	0	129.3	581340000	66				16	135;136;201;234;303;336;340;509;556;574;613;835;929	True;True;True;True;True;True;True;True;True;True;True;True;True	136;137;205;239;309;342;346;519;566;584;623;850;945	226;227;228;229;348;349;405;406;526;582;583;590;591;892;893;980;981;1009;1010;1071;1072;1479;1480;1655;1656	438;439;440;441;442;443;444;445;446;699;700;701;702;703;801;802;803;804;1006;1007;1100;1101;1102;1119;1120;1121;1122;1123;1124;1125;1126;1127;1712;1713;1856;1857;1858;1859;1860;1861;1900;1901;1902;1903;1904;1905;1906;1907;1908;1909;1910;1911;1912;1913;2005;2006;2007;2844;2845;2846;2847;2848;3205;3206;3207;3208	439;446;699;803;1006;1102;1119;1713;1857;1906;2006;2847;3207
sp|Q9S508|PHZB2_PSEAE;sp|O69753|PHZB1_PSEAE	sp|Q9S508|PHZB2_PSEAE;sp|O69753|PHZB1_PSEAE	1;1	1;1	1;1	>sp|Q9S508|PHZB2_PSEAE Phenazine biosynthesis protein PhzB 2 OS=Pseudomonas aeruginosa (strain ATCC 15692 / PAO1 / 1C / PRS 101 / LMG 12228) GN=phzB2 PE=1 SV=1;>sp|O69753|PHZB1_PSEAE Phenazine biosynthesis protein PhzB 1 OS=Pseudomonas aeruginosa (strain A	2	1	1	1	6.2	6.2	6.2	19.027	162	162;162	0	6.4253	2402400	1				17	93	TRUE	94	156	325	325
sp|O69754|PHZF_PSEAE	sp|O69754|PHZF_PSEAE	2	2	2	>sp|O69754|PHZF_PSEAE Trans-2,3-dihydro-3-hydroxyanthranilate isomerase OS=Pseudomonas aeruginosa (strain ATCC 15692 / PAO1 / 1C / PRS 101 / LMG 12228) GN=phzF1 PE=3 SV=2	1	2	2	2	20.5	20.5	20.5	30.342	278	278	0	12.937	20628000	4				18	411;654	True;True	419;666	704;1146	1319;2176;2177;2178	1319;2176
sp|O82850|RS2_PSEAE	sp|O82850|RS2_PSEAE	2	2	2	>sp|O82850|RS2_PSEAE 30S ribosomal protein S2 OS=Pseudomonas aeruginosa (strain ATCC 15692 / PAO1 / 1C / PRS 101 / LMG 12228) GN=rpsB PE=3 SV=2	1	2	2	2	9.8	9.8	9.8	27.336	246	246	0	21.506	49971000	7				19	869;1024	True;True	884;1040	1549;1550;1817;1818	2995;2996;2997;2998;3486;3487;3488	2998;3488
sp|O86428|ILVE_PSEAE	sp|O86428|ILVE_PSEAE	1	1	1	>sp|O86428|ILVE_PSEAE Branched-chain-amino-acid aminotransferase OS=Pseudomonas aeruginosa (strain ATCC 15692 / PAO1 / 1C / PRS 101 / LMG 12228) GN=ilvE PE=1 SV=2	1	1	1	1	3.9	3.9	3.9	34.084	307	307	0	10.006	9201600	2				20	149	TRUE	150	249;250	470;471	471
sp|P04739|FMPO_PSEAE	sp|P04739|FMPO_PSEAE	2	2	2	>sp|P04739|FMPO_PSEAE Fimbrial protein OS=Pseudomonas aeruginosa (strain ATCC 15692 / PAO1 / 1C / PRS 101 / LMG 12228) GN=pilA PE=1 SV=1	1	2	2	2	15.4	15.4	15.4	15.512	149	149	0	16.69	33089000	3				21	772;893	True;True	786;909	1371;1372;1592	2629;2630;3083	2630;3083
sp|P05384|DBHB_PSEAE	sp|P05384|DBHB_PSEAE	1	1	1	>sp|P05384|DBHB_PSEAE DNA-binding protein HU-beta OS=Pseudomonas aeruginosa (strain ATCC 15692 / PAO1 / 1C / PRS 101 / LMG 12228) GN=hupB PE=1 SV=3	1	1	1	1	15.6	15.6	15.6	9.0865	90	90	0	11.57	65898000	4				22	70	TRUE	71	124;125	268;269;270;271	269
sp|P08280|RECA_PSEAE	sp|P08280|RECA_PSEAE	1	1	1	>sp|P08280|RECA_PSEAE Protein RecA OS=Pseudomonas aeruginosa (strain ATCC 15692 / PAO1 / 1C / PRS 101 / LMG 12228) GN=recA PE=3 SV=1	1	1	1	1	5.2	5.2	5.2	36.879	346	346	0	11.126	6522700	3				23	802	TRUE	816	1418;1419	2688;2689;2690	2689
sp|P08308|OTCC_PSEAE	sp|P08308|OTCC_PSEAE	11	11	11	>sp|P08308|OTCC_PSEAE Ornithine carbamoyltransferase, catabolic OS=Pseudomonas aeruginosa (strain ATCC 15692 / PAO1 / 1C / PRS 101 / LMG 12228) GN=arcB PE=1 SV=3	1	11	11	11	32.4	32.4	32.4	38.108	336	336	0	75.807	314790000	38				24	236;262;316;430;615;686;704;708;715;739;1057	True;True;True;True;True;True;True;True;True;True;True	241;267;322;438;625;700;718;722;729;753;1073	409;410;456;457;458;544;739;740;1074;1211;1212;1260;1261;1266;1279;1280;1316;1317;1888;1889	810;811;812;893;894;895;896;897;898;899;900;901;1032;1367;1368;1369;2009;2306;2307;2308;2309;2420;2421;2422;2429;2450;2451;2452;2453;2454;2526;2527;3642;3643;3644;3645;3646;3647	812;898;1032;1369;2009;2308;2421;2429;2452;2527;3642
sp|P09591|EFTU_PSEAE	sp|P09591|EFTU_PSEAE	19	19	19	>sp|P09591|EFTU_PSEAE Elongation factor Tu OS=Pseudomonas aeruginosa (strain ATCC 15692 / PAO1 / 1C / PRS 101 / LMG 12228) GN=tufA PE=1 SV=2	1	19	19	19	57.4	57.4	57.4	43.369	397	397	0	209.08	2247400000	239				25	19;33;37;58;159;176;177;218;267;337;374;623;624;683;707;754;886;888;895	True;True;True;True;True;True;True;True;True;True;True;True;True;True;True;True;True;True;True	19;33;37;58;59;160;177;178;179;180;222;272;343;381;633;634;635;696;697;721;768;902;904;911	38;39;61;62;68;69;102;103;104;105;265;266;293;294;295;296;297;298;299;300;301;302;303;304;377;378;467;584;585;586;647;648;649;1085;1086;1087;1088;1089;1090;1199;1200;1201;1202;1203;1204;1205;1206;1207;1265;1337;1338;1581;1583;1584;1595;1596	80;81;82;83;84;85;120;121;122;132;133;134;135;136;137;138;139;140;141;142;143;144;145;146;147;148;149;150;151;218;219;220;221;222;223;224;225;226;227;228;229;230;231;232;233;234;510;511;563;564;565;566;567;568;569;570;571;572;573;574;575;576;577;578;579;580;581;582;583;584;585;586;587;588;589;590;591;592;593;594;595;596;597;598;599;600;601;602;603;604;605;606;607;608;609;610;611;612;613;614;615;6…	80;120;132;228;510;578;606;753;911;1104;1227;2037;2053;2290;2428;2560;3058;3067;3086	0;1;2;3	177;216;362;372
sp|P11221|OPRI_PSEAE	sp|P11221|OPRI_PSEAE	2	2	2	>sp|P11221|OPRI_PSEAE Major outer membrane lipoprotein OS=Pseudomonas aeruginosa (strain ATCC 15692 / PAO1 / 1C / PRS 101 / LMG 12228) GN=oprI PE=3 SV=1	1	2	2	2	25.3	25.3	25.3	8.8348	83	83	0	19.154	7054400	8				26	482;612	True;True	492;622	836;837;1070	1603;1604;1605;1606;2001;2002;2003;2004	1604;2002
sp|P13794|PORF_PSEAE	sp|P13794|PORF_PSEAE	5	5	5	>sp|P13794|PORF_PSEAE Outer membrane porin F OS=Pseudomonas aeruginosa (strain ATCC 15692 / PAO1 / 1C / PRS 101 / LMG 12228) GN=oprF PE=1 SV=1	1	5	5	5	19.7	19.7	19.7	37.639	350	350	0	48.989	83182000	31				27	188;756;761;913;966	True;True;True;True;True	192;770;775;929;982	323;324;1341;1342;1349;1350;1628;1629;1721;1722;1723	652;653;654;655;656;657;658;2572;2573;2574;2575;2576;2586;2587;2588;3156;3157;3158;3159;3160;3161;3318;3319;3320;3321;3322;3323;3324;3325;3326;3327	657;2575;2588;3156;3322
sp|P13981|ARCA_PSEAE	sp|P13981|ARCA_PSEAE	22	22	22	>sp|P13981|ARCA_PSEAE Arginine deiminase OS=Pseudomonas aeruginosa (strain ATCC 15692 / PAO1 / 1C / PRS 101 / LMG 12228) GN=arcA PE=1 SV=2	1	22	22	22	52.6	52.6	52.6	46.435	418	418	0	292.25	2985600000	237				28	51;167;180;223;247;258;333;467;483;485;486;501;603;723;730;740;759;826;847;848;940;999	True;True;True;True;True;True;True;True;True;True;True;True;True;True;True;True;True;True;True;True;True;True	51;168;183;227;228;252;263;339;475;493;495;496;511;613;737;744;754;773;841;862;863;956;1015	92;93;277;278;309;310;385;386;387;429;430;431;447;448;449;450;574;575;576;577;807;808;838;839;840;841;843;844;845;846;847;848;849;850;876;877;1055;1293;1294;1303;1304;1318;1319;1346;1462;1463;1503;1504;1505;1506;1507;1508;1509;1510;1511;1512;1513;1514;1515;1516;1517;1518;1519;1520;1676;1677;1779	197;198;199;200;201;202;203;530;531;532;533;534;535;536;537;538;539;626;627;628;629;630;631;632;633;763;764;765;766;767;768;769;770;771;772;773;844;845;846;847;848;849;850;851;872;873;874;875;876;877;878;879;880;881;882;883;884;885;1080;1081;1082;1083;1084;1085;1086;1087;1088;1089;1090;1091;1092;1093;1552;1553;1554;1555;1556;1557;1558;1559;1560;1607;1608;1609;1610;1611;1612;1613;1614;1615;1617;16…	198;536;631;768;846;885;1086;1554;1613;1621;1631;1692;1971;2481;2498;2528;2581;2798;2905;2940;3238;3425	4	316
sp|P13982|ARCC_PSEAE	sp|P13982|ARCC_PSEAE	2	2	2	>sp|P13982|ARCC_PSEAE Carbamate kinase OS=Pseudomonas aeruginosa (strain ATCC 15692 / PAO1 / 1C / PRS 101 / LMG 12228) GN=arcC PE=3 SV=1	1	2	2	2	7.4	7.4	7.4	33.08	310	310	0	11.388	3173300	3				29	55;535	True;True	55;545	99;935	214;215;1768	214;1768
sp|P14165|CISY_PSEAE	sp|P14165|CISY_PSEAE	7	7	7	>sp|P14165|CISY_PSEAE Citrate synthase OS=Pseudomonas aeruginosa (strain ATCC 15692 / PAO1 / 1C / PRS 101 / LMG 12228) GN=gltA PE=3 SV=2	1	7	7	7	25.5	25.5	25.5	47.694	428	428	0	46.452	34004000	13				30	59;311;376;502;662;675;713	True;True;True;True;True;True;True	60;317;383;512;674;687;727	106;107;536;652;878;1160;1182;1183;1277	235;236;237;238;239;240;1020;1241;1695;2201;2202;2237;2238;2448	238;1020;1241;1695;2201;2237;2448
sp|P15276|ALGP_PSEAE	sp|P15276|ALGP_PSEAE	1	1	1	>sp|P15276|ALGP_PSEAE Transcriptional regulatory protein AlgP OS=Pseudomonas aeruginosa (strain ATCC 15692 / PAO1 / 1C / PRS 101 / LMG 12228) GN=algP PE=4 SV=2	1	1	1	1	4	4	4	34.49	352	352	0	11.863	11458000	1				31	250	TRUE	255	435	859	859
sp|P29365|DHOM_PSEAE	sp|P29365|DHOM_PSEAE	1	1	1	>sp|P29365|DHOM_PSEAE Homoserine dehydrogenase OS=Pseudomonas aeruginosa (strain ATCC 15692 / PAO1 / 1C / PRS 101 / LMG 12228) GN=hom PE=3 SV=2	1	1	1	1	3.5	3.5	3.5	46.223	434	434	0	6.1521	5906800	0				32	616	TRUE	626	1075;1076	2010;2011	2010
sp|P30718|CH60_PSEAE	sp|P30718|CH60_PSEAE	17	17	17	>sp|P30718|CH60_PSEAE 60 kDa chaperonin OS=Pseudomonas aeruginosa (strain ATCC 15692 / PAO1 / 1C / PRS 101 / LMG 12228) GN=groL PE=1 SV=3	1	17	17	17	48.6	48.6	48.6	57.085	547	547	0	171.68	460280000	69				33	8;47;56;89;90;101;102;105;134;172;242;268;373;669;745;776;919	True;True;True;True;True;True;True;True;True;True;True;True;True;True;True;True;True	8;47;56;90;91;102;103;106;135;173;247;273;380;681;759;790;935	15;16;84;85;100;150;151;152;169;170;171;174;175;176;177;225;285;286;420;421;468;645;646;1173;1174;1324;1325;1377;1378;1637;1638	36;37;38;39;40;41;42;43;44;45;177;178;179;180;181;182;183;184;185;186;187;188;189;216;316;317;318;342;343;344;345;346;347;348;351;352;353;354;355;356;357;358;359;360;361;437;546;547;548;829;830;831;912;1216;1217;2221;2222;2223;2224;2225;2226;2539;2540;2541;2636;2637;2638;3172;3173	42;186;216;316;318;344;348;360;437;548;829;912;1217;2222;2539;2636;3172
sp|P37798|ACCC_PSEAE	sp|P37798|ACCC_PSEAE	11	11	11	>sp|P37798|ACCC_PSEAE Biotin carboxylase OS=Pseudomonas aeruginosa (strain ATCC 15692 / PAO1 / 1C / PRS 101 / LMG 12228) GN=accC PE=1 SV=1	1	11	11	11	36.5	36.5	36.5	48.887	449	449	0	91.604	152670000	28				34	52;254;298;381;691;778;837;935;939;982;1014	True;True;True;True;True;True;True;True;True;True;True	52;259;304;388;705;792;852;951;955;998;1030	94;95;441;442;520;659;1236;1237;1380;1381;1484;1485;1667;1668;1674;1675;1751;1799;1800	204;205;206;866;867;1000;1250;2387;2388;2640;2641;2642;2643;2644;2645;2860;2861;3226;3227;3228;3236;3237;3373;3374;3452;3453;3454;3455	206;866;1000;1250;2387;2641;2860;3227;3237;3373;3452
sp|P37799|BCCP_PSEAE	sp|P37799|BCCP_PSEAE	8	8	8	>sp|P37799|BCCP_PSEAE Biotin carboxyl carrier protein of acetyl-CoA carboxylase OS=Pseudomonas aeruginosa (strain ATCC 15692 / PAO1 / 1C / PRS 101 / LMG 12228) GN=accB PE=3 SV=1	1	8	8	8	62.2	62.2	62.2	16.455	156	156	0	112.86	1583000000	105				35	7;488;489;550;551;583;806;829	True;True;True;True;True;True;True;True	7;498;499;560;561;593;820;821;844	13;14;854;855;856;857;858;859;860;965;966;967;968;969;970;971;1026;1424;1425;1426;1427;1466;1467;1468;1469;1470	20;21;22;23;24;25;26;27;28;29;30;31;32;33;34;35;1646;1647;1648;1649;1650;1651;1652;1653;1654;1655;1656;1657;1658;1659;1660;1661;1662;1663;1826;1827;1828;1829;1830;1831;1832;1833;1834;1835;1836;1837;1838;1839;1840;1841;1842;1843;1936;2696;2697;2698;2699;2700;2701;2702;2703;2704;2705;2706;2707;2708;2709;2710;2711;2712;2713;2714;2715;2716;2717;2803;2804;2805;2806;2807;2808;2809;2810;2811;2812;2813;2…	30;1647;1660;1830;1843;1936;2702;2822	5	87
sp|P38100|CARB_PSEAE	sp|P38100|CARB_PSEAE	10	10	10	>sp|P38100|CARB_PSEAE Carbamoyl-phosphate synthase large chain OS=Pseudomonas aeruginosa (strain ATCC 15692 / PAO1 / 1C / PRS 101 / LMG 12228) GN=carB PE=3 SV=3	1	10	10	10	14	14	14	117.33	1073	1073	0	82.885	51844000	17				36	60;205;362;512;586;637;752;820;865;872	True;True;True;True;True;True;True;True;True;True	61;209;369;522;596;648;766;835;880;887	108;355;356;628;898;899;1029;1113;1335;1453;1542;1543;1557	241;712;713;714;715;716;1185;1719;1720;1939;1940;2093;2094;2557;2783;2986;2987;3016;3017	241;713;1185;1719;1940;2093;2557;2783;2987;3017
sp|P43336|PHHC_PSEAE	sp|P43336|PHHC_PSEAE	4	4	4	>sp|P43336|PHHC_PSEAE Aromatic-amino-acid aminotransferase OS=Pseudomonas aeruginosa (strain ATCC 15692 / PAO1 / 1C / PRS 101 / LMG 12228) GN=phhC PE=3 SV=2	1	4	4	4	15	15	15	43.273	399	399	0	28.977	51059000	10				37	11;416;499;973	True;True;True;True	11;424;509;989	22;23;713;714;873;1736;1737	53;54;1330;1331;1687;1688;3351;3352;3353;3354	53;1330;1688;3353
sp|P47203|FTSA_PSEAE	sp|P47203|FTSA_PSEAE	2	2	2	>sp|P47203|FTSA_PSEAE Cell division protein FtsA OS=Pseudomonas aeruginosa (strain ATCC 15692 / PAO1 / 1C / PRS 101 / LMG 12228) GN=ftsA PE=3 SV=2	1	2	2	2	6	6	6	44.646	417	417	0	14.445	6114500	4				38	876;947	True;True	891;963	1563;1564;1690	3028;3029;3274;3275	3029;3275
sp|P47204|FTSZ_PSEAE	sp|P47204|FTSZ_PSEAE	2	2	2	>sp|P47204|FTSZ_PSEAE Cell division protein FtsZ OS=Pseudomonas aeruginosa (strain ATCC 15692 / PAO1 / 1C / PRS 101 / LMG 12228) GN=ftsZ PE=1 SV=2	1	2	2	2	7.9	7.9	7.9	41.218	394	394	0	31.579	4292100	5				39	342;996	True;True	348;1012	593;1774;1775;1776	1129;3417;3418;3419;3420	1129;3417
sp|P48247|GSA_PSEAE	sp|P48247|GSA_PSEAE	2	2	2	>sp|P48247|GSA_PSEAE Glutamate-1-semialdehyde 2,1-aminomutase OS=Pseudomonas aeruginosa (strain ATCC 15692 / PAO1 / 1C / PRS 101 / LMG 12228) GN=hemL PE=1 SV=2	1	2	2	2	8.4	8.4	8.4	45.397	427	427	0	26.489	26754000	5				40	48;682	True;True	48;695	86;87;1197;1198	190;191;192;2261;2262	192;2261
sp|P50987|ARLY_PSEAE	sp|P50987|ARLY_PSEAE	1	1	1	>sp|P50987|ARLY_PSEAE Argininosuccinate lyase OS=Pseudomonas aeruginosa (strain ATCC 15692 / PAO1 / 1C / PRS 101 / LMG 12228) GN=argH PE=3 SV=2	1	1	1	1	2.8	2.8	2.8	51.64	464	464	0	10.891	9057800	2				41	917	TRUE	933	1633;1634	3166;3167	3167
sp|P53593|SUCC_PSEAE	sp|P53593|SUCC_PSEAE	18	18	18	>sp|P53593|SUCC_PSEAE Succinyl-CoA ligase [ADP-forming] subunit beta OS=Pseudomonas aeruginosa (strain ATCC 15692 / PAO1 / 1C / PRS 101 / LMG 12228) GN=sucC PE=3 SV=2	1	18	18	18	50.5	50.5	50.5	41.542	388	388	0	180.54	723660000	75				42	31;129;142;227;228;414;424;453;454;519;525;526;671;712;727;742;747;945	True;True;True;True;True;True;True;True;True;True;True;True;True;True;True;True;True;True	31;130;143;232;233;422;432;461;462;529;535;536;683;726;741;756;761;961	57;58;216;237;238;394;395;396;708;709;710;727;728;774;775;776;777;908;909;918;919;920;921;1176;1274;1275;1276;1298;1299;1321;1327;1328;1684;1685;1686;1687	111;112;113;114;115;418;419;420;421;422;423;454;455;782;783;784;1324;1325;1326;1347;1348;1421;1422;1423;1424;1425;1426;1427;1428;1429;1430;1729;1730;1739;1740;1741;1742;1743;1744;1745;1746;2229;2438;2439;2440;2441;2442;2443;2444;2445;2446;2447;2490;2491;2536;2544;2545;2546;2547;2548;2549;3253;3254;3255;3256;3257;3258;3259;3260;3261;3262;3263;3264;3265;3266;3267;3268;3269	111;419;455;782;784;1325;1348;1421;1430;1729;1741;1746;2229;2438;2491;2536;2545;3254
sp|P53641|SODF_PSEAE	sp|P53641|SODF_PSEAE	1	1	1	>sp|P53641|SODF_PSEAE Superoxide dismutase [Fe] OS=Pseudomonas aeruginosa (strain ATCC 15692 / PAO1 / 1C / PRS 101 / LMG 12228) GN=sodB PE=3 SV=3	1	1	1	1	5.7	5.7	5.7	21.351	193	193	0	5.9344	3740900	1				43	34	TRUE	34	63	123	123
sp|P57112|STHA_PSEAE	sp|P57112|STHA_PSEAE	3	3	3	>sp|P57112|STHA_PSEAE Soluble pyridine nucleotide transhydrogenase OS=Pseudomonas aeruginosa (strain ATCC 15692 / PAO1 / 1C / PRS 101 / LMG 12228) GN=sthA PE=1 SV=2	1	3	3	3	7.5	7.5	7.5	51.16	464	464	0	19.631	5474700	5				44	117;354;762	True;True;True	118;360;776	199;612;1351	393;1152;1153;2589;2590	393;1152;2590
sp|P72173|AAT_PSEAE	sp|P72173|AAT_PSEAE	8	8	8	>sp|P72173|AAT_PSEAE Aspartate aminotransferase OS=Pseudomonas aeruginosa (strain ATCC 15692 / PAO1 / 1C / PRS 101 / LMG 12228) GN=aspC PE=3 SV=2	1	8	8	8	28.1	28.1	28.1	43.319	398	398	0	72.591	104850000	18				45	43;74;372;564;570;920;1011;1066	True;True;True;True;True;True;True;True	43;75;379;574;580;936;1027;1082	78;79;131;132;643;644;994;995;1004;1639;1640;1794;1795;1902;1903	167;168;278;279;280;1213;1214;1215;1879;1880;1881;1891;3174;3175;3446;3447;3448;3689;3690	167;279;1213;1880;1891;3175;3447;3689
sp|P77915|HEMN_PSEAE	sp|P77915|HEMN_PSEAE	6	6	6	>sp|P77915|HEMN_PSEAE Oxygen-independent coproporphyrinogen-III oxidase OS=Pseudomonas aeruginosa (strain ATCC 15692 / PAO1 / 1C / PRS 101 / LMG 12228) GN=hemN PE=2 SV=2	1	6	6	6	17.6	17.6	17.6	52.488	460	460	0	44.986	32703000	9				46	259;609;790;887;989;1064	True;True;True;True;True;True	264;619;804;903;1005;1080	451;1066;1400;1401;1582;1764;1765;1899	886;1997;2666;2667;2668;3059;3404;3405;3661	886;1997;2666;3059;3404;3661
sp|Q51342|PUR1_PSEAE	sp|Q51342|PUR1_PSEAE	3	3	3	>sp|Q51342|PUR1_PSEAE Amidophosphoribosyltransferase OS=Pseudomonas aeruginosa (strain ATCC 15692 / PAO1 / 1C / PRS 101 / LMG 12228) GN=purF PE=3 SV=3	1	3	3	3	9.4	9.4	9.4	55.369	501	501	0	23.538	56277000	6				47	225;382;804	True;True;True	230;389;818	392;660;1421;1422	780;1251;1252;2692;2693;2694	780;1251;2693
sp|Q51422|SYDND_PSEAE	sp|Q51422|SYDND_PSEAE	4	4	4	>sp|Q51422|SYDND_PSEAE Aspartate--tRNA(Asp/Asn) ligase OS=Pseudomonas aeruginosa (strain ATCC 15692 / PAO1 / 1C / PRS 101 / LMG 12228) GN=aspS PE=1 SV=2	1	4	4	4	10.7	10.7	10.7	66.207	591	591	0	54.254	40664000	14				48	148;459;881;921	True;True;True;True	149;467;896;897;937	247;248;797;798;1571;1572;1573;1641;1642	467;468;469;1540;1541;1542;3040;3041;3042;3043;3044;3176;3177;3178	467;1540;3042;3178	6	565
sp|Q51561|RPOB_PSEAE	sp|Q51561|RPOB_PSEAE	31	31	31	>sp|Q51561|RPOB_PSEAE DNA-directed RNA polymerase subunit beta OS=Pseudomonas aeruginosa (strain ATCC 15692 / PAO1 / 1C / PRS 101 / LMG 12228) GN=rpoB PE=3 SV=2	1	31	31	31	36.3	36.3	36.3	150.84	1357	1357	0	270.34	590470000	87				49	53;76;110;161;186;194;209;211;312;326;338;367;369;393;475;497;589;601;606;645;650;672;755;813;819;839;855;901;986;1036;1042	True;True;True;True;True;True;True;True;True;True;True;True;True;True;True;True;True;True;True;True;True;True;True;True;True;True;True;True;True;True;True	53;77;111;162;190;198;213;215;318;332;344;374;376;400;485;507;599;611;616;657;662;684;769;828;834;854;870;917;1002;1052;1058	96;97;134;135;136;184;185;269;321;334;335;362;365;537;538;560;561;587;636;639;677;824;825;870;871;1034;1052;1053;1060;1061;1130;1131;1139;1140;1177;1178;1339;1340;1436;1437;1452;1488;1489;1527;1528;1606;1758;1759;1836;1837;1863;1864	207;208;209;210;211;283;284;285;286;287;288;289;290;291;292;371;372;516;517;650;674;675;723;726;727;1021;1022;1023;1056;1057;1115;1116;1202;1207;1208;1271;1272;1585;1586;1684;1685;1947;1968;1969;1983;1984;1985;1986;2151;2152;2153;2154;2155;2168;2169;2170;2230;2231;2232;2233;2567;2568;2569;2570;2571;2727;2728;2729;2730;2779;2780;2781;2782;2864;2865;2968;2969;2970;3107;3108;3393;3394;3511;3512;3605…	211;288;372;517;650;674;723;726;1021;1056;1115;1202;1207;1271;1586;1684;1947;1969;1986;2152;2170;2232;2570;2727;2781;2865;2970;3107;3394;3512;3605
sp|Q51567|SUCD_PSEAE	sp|Q51567|SUCD_PSEAE	4	4	4	>sp|Q51567|SUCD_PSEAE Succinyl-CoA ligase [ADP-forming] subunit alpha OS=Pseudomonas aeruginosa (strain ATCC 15692 / PAO1 / 1C / PRS 101 / LMG 12228) GN=sucD PE=3 SV=2	1	4	4	4	15.6	15.6	15.6	30.266	295	295	0	27.639	54676000	12				50	69;260;325;782	True;True;True;True	70;265;331;796	122;123;452;453;559;1387;1388	264;265;266;267;887;888;889;890;1054;1055;2652;2653	264;887;1055;2652
sp|Q59637|ODP1_PSEAE	sp|Q59637|ODP1_PSEAE	18	18	18	>sp|Q59637|ODP1_PSEAE Pyruvate dehydrogenase E1 component OS=Pseudomonas aeruginosa (strain ATCC 15692 / PAO1 / 1C / PRS 101 / LMG 12228) GN=aceE PE=3 SV=2	1	18	18	18	22.2	22.2	22.2	99.563	882	882	0	130.03	221450000	40				51	171;187;195;222;294;425;461;477;636;648;674;695;783;801;845;952;1015;1026	True;True;True;True;True;True;True;True;True;True;True;True;True;True;True;True;True;True	172;191;199;226;300;433;469;487;647;660;686;709;797;815;860;968;1031;1042	283;284;322;336;383;384;515;516;729;730;800;801;827;1112;1135;1136;1180;1181;1243;1244;1389;1390;1416;1417;1500;1501;1697;1698;1801;1821	544;545;651;676;760;761;762;994;995;996;1349;1350;1351;1352;1544;1545;1546;1589;2092;2160;2161;2162;2163;2235;2236;2395;2396;2397;2398;2654;2655;2685;2686;2687;2882;2883;3285;3286;3456;3457;3491	544;651;676;762;994;1349;1545;1589;2092;2163;2235;2395;2655;2686;2883;3285;3456;3491
sp|Q59638|ODP2_PSEAE	sp|Q59638|ODP2_PSEAE	8	8	8	>sp|Q59638|ODP2_PSEAE Dihydrolipoyllysine-residue acetyltransferase component of pyruvate dehydrogenase complex OS=Pseudomonas aeruginosa (strain ATCC 15692 / PAO1 / 1C / PRS 101 / LMG 12228) GN=aceF PE=2 SV=2	1	8	8	8	15.2	15.2	15.2	56.708	547	547	0	54.39	67319000	13				52	238;271;443;534;577;618;797;798	True;True;True;True;True;True;True;True	243;276;451;544;587;628;811;812	412;413;473;474;758;933;934;1015;1016;1078;1079;1410;1411	814;815;816;918;919;1392;1766;1767;1920;1921;2013;2014;2679;2680	814;919;1392;1767;1921;2013;2679;2680
sp|Q9HT16|ATPF_PSEAE	sp|Q9HT16|ATPF_PSEAE	2	2	2	>sp|Q9HT16|ATPF_PSEAE ATP synthase subunit b OS=Pseudomonas aeruginosa (strain ATCC 15692 / PAO1 / 1C / PRS 101 / LMG 12228) GN=atpF PE=3 SV=1	1	2	2	2	15.4	15.4	15.4	16.956	156	156	0	15.752	7035300	3				53	114;119	True;True	115;120	191;192;202	382;383;400	383;400
sp|Q9HT18|ATPA_PSEAE	sp|Q9HT18|ATPA_PSEAE	12	12	12	>sp|Q9HT18|ATPA_PSEAE ATP synthase subunit alpha OS=Pseudomonas aeruginosa (strain ATCC 15692 / PAO1 / 1C / PRS 101 / LMG 12228) GN=atpA PE=3 SV=1	1	12	12	12	28.8	28.8	28.8	55.393	514	514	0	94.816	221890000	34				54	204;226;317;436;696;744;817;818;832;909;930;995	True;True;True;True;True;True;True;True;True;True;True;True	208;231;323;444;710;758;832;833;847;925;946;1011	353;354;393;545;546;747;748;1245;1246;1323;1449;1450;1451;1474;1475;1620;1621;1657;1658;1773	709;710;711;781;1033;1034;1035;1036;1378;1379;1380;1381;2399;2400;2538;2774;2775;2776;2777;2778;2836;2837;2838;3132;3133;3134;3209;3210;3211;3212;3213;3414;3415;3416	711;781;1033;1378;2399;2538;2774;2777;2837;3132;3212;3414
sp|Q9HT19|ATPG_PSEAE	sp|Q9HT19|ATPG_PSEAE	1	1	1	>sp|Q9HT19|ATPG_PSEAE ATP synthase gamma chain OS=Pseudomonas aeruginosa (strain ATCC 15692 / PAO1 / 1C / PRS 101 / LMG 12228) GN=atpG PE=3 SV=1	1	1	1	1	6.6	6.6	6.6	31.553	286	286	0	15.154	19368000	3				55	694	TRUE	708	1241;1242	2392;2393;2394	2394
sp|Q9HT20|ATPB_PSEAE	sp|Q9HT20|ATPB_PSEAE	8	8	8	>sp|Q9HT20|ATPB_PSEAE ATP synthase subunit beta OS=Pseudomonas aeruginosa (strain ATCC 15692 / PAO1 / 1C / PRS 101 / LMG 12228) GN=atpD PE=3 SV=1	1	8	8	8	24	24	24	49.499	458	458	0	65.807	59083000	16				56	169;365;450;786;907;908;925;1063	True;True;True;True;True;True;True;True	170;372;458;800;923;924;941;1079	281;633;769;1394;1616;1617;1618;1619;1648;1649;1897;1898	542;1197;1416;2660;3124;3125;3126;3127;3128;3129;3130;3131;3196;3197;3659;3660	542;1197;1416;2660;3124;3129;3197;3659
sp|Q9HT95|ATSE4_PSEAE	sp|Q9HT95|ATSE4_PSEAE	1	1	1	>sp|Q9HT95|ATSE4_PSEAE Acetyltransferase PA5475 OS=Pseudomonas aeruginosa (strain ATCC 15692 / PAO1 / 1C / PRS 101 / LMG 12228) GN=PA5475 PE=3 SV=1	1	1	1	1	5.9	5.9	5.9	21	186	186	0	8.5257	3884500	2				57	749	TRUE	763	1331;1332	2553;2554	2553
sp|Q9HTD7|ASPA_PSEAE	sp|Q9HTD7|ASPA_PSEAE	1	1	1	>sp|Q9HTD7|ASPA_PSEAE Aspartate ammonia-lyase OS=Pseudomonas aeruginosa (strain ATCC 15692 / PAO1 / 1C / PRS 101 / LMG 12228) GN=aspA PE=3 SV=1	1	1	1	1	7.2	7.2	7.2	51.069	474	474	0	6.3031	3911200	4				58	495	TRUE	505	867;868	1679;1680;1681;1682	1680
sp|Q9HTF1|LTAE_PSEAE	sp|Q9HTF1|LTAE_PSEAE	2	2	2	>sp|Q9HTF1|LTAE_PSEAE Low specificity L-threonine aldolase OS=Pseudomonas aeruginosa (strain ATCC 15692 / PAO1 / 1C / PRS 101 / LMG 12228) GN=ltaE PE=3 SV=1	1	2	2	2	10.7	10.7	10.7	38.213	346	346	0	16.71	13161000	4				59	274;1010	True;True	279;1026	477;478;1793	923;924;3444;3445	923;3445
sp|Q9HTN8|RL28_PSEAE	sp|Q9HTN8|RL28_PSEAE	1	1	1	>sp|Q9HTN8|RL28_PSEAE 50S ribosomal protein L28 OS=Pseudomonas aeruginosa (strain ATCC 15692 / PAO1 / 1C / PRS 101 / LMG 12228) GN=rpmB PE=3 SV=1	1	1	1	1	12.8	12.8	12.8	9.0655	78	78	0	7.7709	17306000	3				60	334	TRUE	340	578;579	1094;1095;1096	1096
sp|Q9HTQ0|DADA1_PSEAE	sp|Q9HTQ0|DADA1_PSEAE	6	6	6	>sp|Q9HTQ0|DADA1_PSEAE D-amino acid dehydrogenase 1 OS=Pseudomonas aeruginosa (strain ATCC 15692 / PAO1 / 1C / PRS 101 / LMG 12228) GN=dadA1 PE=1 SV=1	1	6	6	6	16.9	16.9	16.9	47.139	432	432	0	45.402	34185000	11				61	28;784;866;878;961;1055	True;True;True;True;True;True	28;798;881;893;977;1071	53;1391;1544;1545;1567;1712;1884;1885	105;2656;2988;2989;2990;3032;3033;3302;3303;3637;3638	105;2656;2989;3033;3302;3637
sp|Q9HTQ2|ALR2_PSEAE	sp|Q9HTQ2|ALR2_PSEAE	1	1	1	>sp|Q9HTQ2|ALR2_PSEAE Alanine racemase, catabolic OS=Pseudomonas aeruginosa (strain ATCC 15692 / PAO1 / 1C / PRS 101 / LMG 12228) GN=dadX PE=1 SV=1	1	1	1	1	2.5	2.5	2.5	38.914	357	357	0	6.6177	0	1				62	77	TRUE	78	137	293	293
sp|Q9HTV1|RHO_PSEAE	sp|Q9HTV1|RHO_PSEAE	3	3	3	>sp|Q9HTV1|RHO_PSEAE Transcription termination factor Rho OS=Pseudomonas aeruginosa (strain ATCC 15692 / PAO1 / 1C / PRS 101 / LMG 12228) GN=rho PE=3 SV=1	1	3	3	3	9.8	9.8	9.8	47.069	419	419	0	28.184	23735000	4				63	437;651;857	True;True;True	445;663;872	749;750;1141;1142;1530	1382;1383;2171;2172;2972	1382;2171;2972
sp|Q9HTZ7|PCKA_PSEAE	sp|Q9HTZ7|PCKA_PSEAE	1	1	1	>sp|Q9HTZ7|PCKA_PSEAE Phosphoenolpyruvate carboxykinase [ATP] OS=Pseudomonas aeruginosa (strain ATCC 15692 / PAO1 / 1C / PRS 101 / LMG 12228) GN=pckA PE=3 SV=1	1	1	1	1	2.5	2.5	2.5	55.731	513	513	0	6.3936	3169500	2				64	145	TRUE	146	242	459;460	459
sp|Q9HU21|RMLC_PSEAE	sp|Q9HU21|RMLC_PSEAE	1	1	1	>sp|Q9HU21|RMLC_PSEAE dTDP-4-dehydrorhamnose 3,5-epimerase OS=Pseudomonas aeruginosa (strain ATCC 15692 / PAO1 / 1C / PRS 101 / LMG 12228) GN=rmlC PE=1 SV=1	1	1	1	1	6.6	6.6	6.6	20.766	181	181	0	6.2311	13935000	2				65	504	TRUE	514	880;881	1697;1698	1697
sp|Q9HU65|GLNA_PSEAE	sp|Q9HU65|GLNA_PSEAE	9	9	9	>sp|Q9HU65|GLNA_PSEAE Glutamine synthetase OS=Pseudomonas aeruginosa (strain ATCC 15692 / PAO1 / 1C / PRS 101 / LMG 12228) GN=glnA PE=1 SV=1	1	9	9	9	27.1	27.1	27.1	51.944	469	469	0	92.037	114730000	47				66	85;86;154;165;287;460;632;722;812	True;True;True;True;True;True;True;True;True	86;87;155;166;292;293;468;643;736;827	145;146;147;255;275;500;501;502;503;504;505;799;1104;1105;1289;1290;1291;1292;1435	306;307;308;309;310;311;477;526;527;964;965;966;967;968;969;970;971;972;973;974;975;976;977;978;979;980;981;1543;2074;2075;2076;2077;2078;2079;2468;2469;2470;2471;2472;2473;2474;2475;2476;2477;2478;2479;2726	306;310;477;527;972;1543;2077;2468;2726	7	377
sp|Q9HUA6|OPGH_PSEAE	sp|Q9HUA6|OPGH_PSEAE	1	1	1	>sp|Q9HUA6|OPGH_PSEAE Glucans biosynthesis glucosyltransferase H OS=Pseudomonas aeruginosa (strain ATCC 15692 / PAO1 / 1C / PRS 101 / LMG 12228) GN=opgH PE=3 SV=1	1	1	1	1	1.9	1.9	1.9	96.994	861	861	0	6.328	192390	1				67	463	TRUE	471	803	1548	1548
sp|Q9HUC8|SYR_PSEAE	sp|Q9HUC8|SYR_PSEAE	1	1	1	>sp|Q9HUC8|SYR_PSEAE Arginine--tRNA ligase OS=Pseudomonas aeruginosa (strain ATCC 15692 / PAO1 / 1C / PRS 101 / LMG 12228) GN=argS PE=3 SV=1	1	1	1	1	2	2	2	65.199	587	587	0	8.3101	4033000	2				68	862	TRUE	877	1539	2982;2983	2982
sp|Q9HUM0|HFQ_PSEAE	sp|Q9HUM0|HFQ_PSEAE	1	1	1	>sp|Q9HUM0|HFQ_PSEAE RNA-binding protein Hfq OS=Pseudomonas aeruginosa (strain ATCC 15692 / PAO1 / 1C / PRS 101 / LMG 12228) GN=hfq PE=1 SV=1	1	1	1	1	15.9	15.9	15.9	9.1034	82	82	0.0087336	5.5896	1597000	2				69	595	TRUE	605	1042;1043	1956;1957	1957
sp|Q9HUM6|PURA_PSEAE	sp|Q9HUM6|PURA_PSEAE	2	2	2	>sp|Q9HUM6|PURA_PSEAE Adenylosuccinate synthetase OS=Pseudomonas aeruginosa (strain ATCC 15692 / PAO1 / 1C / PRS 101 / LMG 12228) GN=purA PE=3 SV=1	1	2	2	2	7	7	7	46.814	430	430	0	17.963	16756000	3				70	861;931	True;True	876;947	1538;1659;1660	2981;3214;3215	2981;3215
sp|Q9HUM9|RS6_PSEAE	sp|Q9HUM9|RS6_PSEAE	1	1	1	>sp|Q9HUM9|RS6_PSEAE 30S ribosomal protein S6 OS=Pseudomonas aeruginosa (strain ATCC 15692 / PAO1 / 1C / PRS 101 / LMG 12228) GN=rpsF PE=3 SV=1	1	1	1	1	7.2	7.2	7.2	16.164	139	139	0	6.3213	0	1				71	68	TRUE	69	121	263	263
[truncated: 163 more rows]

## Sheet: 5-2 Sheet1
Protein IDs-C4HSL (full)
REV__sp|P45682|NLPD_PSEAE
REV__tr|Q9HXW2|Q9HXW2_PSEAE
sp|G3XD23|WBPB_PSEAE
sp|G3XD61|WBPI_PSEAE
[truncated: 251 more rows]

## Sheet: 5-2 Sheet2
Protein IDs-Probe 12 (subtracted)	Protein IDs-Probe 12 (full)			Fasta headers	Number of proteins	Peptides	Razor + unique peptides
[truncated: 231 more rows]

[truncated: 4 more sheets: 5-3 proteinGroups C4HSL-1 , 5-3 proteinGroups Probe 12, 5-3 Sheet1, 5-3 Sheet2]
