# Supplementary material for: Short-chain reactive probes as tools to unravel the Pseudomonas aeruginosa quorum sensing regulon
Source: Royal Society of Chemistry journal article supplement (doi:10.1039/d0sc04444j), 2021-01-01
Supplement: d0sc04444j2.zip [file Experiment 6.xlsx]

## Sheet: Key
Experiment 6	Chemical proteomics with Probe 12: Identification of proteins after incubation and photoaffinity labeling with Probe 12 in wild-type P. aeruginosa strain PAO1
Experimental methods	Yellow, Green and Blue sheets are independent biological replicates: Bacteria were grown, harvested, lysed, the lysates were incubated with C4HSL/Probe 12 in triplicates and labeled, downstream processed, streptavidin affinity enriched and trypticaly digested on the same day. StageTips desalting was done on the next day and LC-MS/MS analysis was performed later
Excel sheets content
6-1 proteinGroups C4HSL-1	Experiment 6 repeat 1 Raw data results of C4HSL control labeling
6-1 proteinGroups Probe 12	Experiment 6 repeat 1 Raw data results of Probe 12 labeling
6-1 Sheet1	Experiment 6 repeat 1: C4HSL results and unique Probe 12 results (C4HSL hits are subtracted)
6-1 Sheet2	Experiment 6 repeat 1: Filtered data of proteins for Probe 12 labeling which retain razor+unique peptides requirement of >1 for each replicate (filled with green)
For Green and Blue sheets-same as above only repeat experiment number changes (6-2, 6-3)

## Sheet: 6-1 proteinGroups C4HSL-1
Protein IDs	Majority protein IDs	Peptide counts (all)	Peptide counts (razor+unique)	Peptide counts (unique)	Fasta headers	Number of proteins	Peptides	Razor + unique peptides	Unique peptides	Sequence coverage [%]	Unique + razor sequence coverage [%]	Unique sequence coverage [%]	Mol. weight [kDa]	Sequence length	Sequence lengths	Q-value	Score	Intensity	MS/MS Count	Only identified by site	Reverse	Potential contaminant	id	Peptide IDs	Peptide is razor	Mod. peptide IDs	Evidence IDs	MS/MS IDs	Best MS/MS	Oxidation (M) site IDs	Oxidation (M) site positions
CON__ENSEMBL:ENSBTAP00000038253;CON__P48668;CON__P04259;CON__P02538;CON__P19013	CON__ENSEMBL:ENSBTAP00000038253	3;1;1;1;1	1;1;1;1;1	0;0;0;0;0	>ENSEMBL:ENSBTAP00000038253 (Bos taurus) 63 kDa protein	5	3	1	0	5.4	1.5	0	63.165	606	606;564;564;564;594	0	6.3898	0	1			+	0	43;92;246	True;False;False	45;95;255	82;159;160;490;491	172;309;310;311;312;313;314;315;316;317;1194;1195	172;309;1195
CON__P00761	CON__P00761	4	4	4	>P00761 SWISS-PROT:P00761|TRYP_PIG Trypsin - Sus scrofa (Pig).	1	4	4	4	25.1	25.1	25.1	24.409	231	231	0	62.299	1352200000	82			+	1	139;170;191;274	True;True;True;True	144;145;176;197;284	237;238;239;240;241;242;304;305;306;307;357;358;552;553;554;555	488;489;490;491;492;493;494;495;496;497;498;499;659;660;661;662;663;664;665;666;667;668;669;670;671;672;673;674;675;676;677;678;679;680;681;682;683;684;685;686;805;806;807;808;809;810;811;1421;1422;1423;1424;1425;1426;1427;1428;1429;1430;1431;1432;1433;1434;1435;1436;1437;1438;1439;1440;1441;1442;1443;1444;1445;1446;1447;1448;1449;1450;1451;1452;1453;1454;1455;1456	498;683;806;1426	0	94
CON__P02535-1;CON__P13645	CON__P02535-1;CON__P13645	1;1	1;1	1;1	>P02535-1 SWISS-PROT:P02535-1 Tax_Id=10090 Gene_Symbol=Krt10 Isoform 1 of Keratin, type I cytoskeletal 10;>P13645 SWISS-PROT:P13645 Tax_Id=9606 Gene_Symbol=KRT10 Keratin, type I cytoskeletal 10	2	1	1	1	1.6	1.6	1.6	57.769	570	570;593	0	9.5287	4683300	3			+	2	166	TRUE	172	298;299	650;651;652	652
CON__P04264;CON__Q9R0H5;CON__Q6NXH9;CON__Q8BGZ7;CON__P50446;CON__Q6IFZ6;CON__Q7Z794;CON__Q922U2;CON__Q5XQN5	CON__P04264	6;1;1;1;1;1;1;1;1	6;1;1;1;1;1;1;1;1	3;0;0;1;1;0;0;1;1	>P04264 SWISS-PROT:P04264 Tax_Id=9606 Gene_Symbol=KRT1 Keratin, type II cytoskeletal 1	9	6	6	3	9.9	9.9	5	66.017	644	644;524;539;551;553;572;578;580;601	0	72.533	38093000	21			+	3	9;92;132;244;246;310	True;True;True;True;True;True	9;95;136;253;255;321	16;17;159;160;223;485;486;487;490;491;629;630	52;53;309;310;311;312;313;314;315;316;317;463;1187;1188;1189;1190;1191;1194;1195;1647;1648	52;309;463;1189;1195;1648
CON__P07477	CON__P07477	1	1	1	>P07477 SWISS-PROT:P07477 Tax_Id=9606 Gene_Symbol=PRSS1 Trypsin-1 precursor	1	1	1	1	8.1	8.1	8.1	26.558	247	247	0	5.8959	14023000	4			+	4	171	TRUE	177	308;309	687;688;689;690	689
CON__Q28107	CON__Q28107	1	1	1	>Q28107 SWISS-PROT:Q28107 (Bos taurus) Coagulation factor V precursor	1	1	1	1	0.6	0.6	0.6	248.98	2211	2211	0	5.5749	3499000	1			+	5	255	TRUE	265	510	1309	1309
CON__Streptavidin	CON__Streptavidin	6	6	6	>Streptavidin (S.avidinii)	1	6	6	6	45.6	45.6	45.6	16.622	160	160	0	141.09	3744600000	412			+	6	146;147;213;250;308;309	True;True;True;True;True;True	152;153;221;260;319;320	253;254;255;256;257;258;259;260;261;262;263;264;265;266;267;268;269;270;399;400;401;402;403;404;405;406;407;408;409;410;411;412;413;414;415;416;417;418;419;420;421;422;423;424;425;426;427;428;429;430;431;499;500;501;502;503;504;615;616;617;618;619;620;621;622;623;624;625;626;627;628	513;514;515;516;517;518;519;520;521;522;523;524;525;526;527;528;529;530;531;532;533;534;535;536;537;538;539;540;541;542;543;544;545;546;547;548;549;550;551;552;553;554;555;556;557;558;559;560;561;562;563;564;565;566;567;568;569;570;571;572;573;574;575;576;577;578;579;580;581;582;583;584;585;586;587;588;589;590;591;592;593;594;595;596;597;598;599;600;601;602;603;604;605;606;607;608;609;610;611;612…	560;615;929;1275;1626;1645
sp|O52759|RS4_PSEAE	sp|O52759|RS4_PSEAE	2	2	2	>sp|O52759|RS4_PSEAE 30S ribosomal protein S4 OS=Pseudomonas aeruginosa (strain ATCC 15692 / PAO1 / 1C / PRS 101 / LMG 12228) GN=rpsD PE=3 SV=2	1	2	2	2	12.6	12.6	12.6	23.277	206	206	0	14.293	4380900	3				7	22;190	True;True	23;196	44;355;356	113;803;804	113;803
sp|O52762|CATA_PSEAE	sp|O52762|CATA_PSEAE	3	3	3	>sp|O52762|CATA_PSEAE Catalase OS=Pseudomonas aeruginosa (strain ATCC 15692 / PAO1 / 1C / PRS 101 / LMG 12228) GN=katA PE=1 SV=1	1	3	3	3	10.4	10.4	10.4	55.588	482	482	0	33.506	5960400	4				8	111;167;194	True;True;True	114;173;200	191;300;301;362	378;653;654;817	378;654;817
sp|O68822|AMPA_PSEAE	sp|O68822|AMPA_PSEAE	11	11	11	>sp|O68822|AMPA_PSEAE Cytosol aminopeptidase OS=Pseudomonas aeruginosa (strain ATCC 15692 / PAO1 / 1C / PRS 101 / LMG 12228) GN=pepA PE=3 SV=1	1	11	11	11	29.3	29.3	29.3	52.331	495	495	0	94.036	51402000	31				9	48;49;73;95;106;108;164;177;182;258;279	True;True;True;True;True;True;True;True;True;True;True	50;51;76;98;109;111;170;183;188;268;289	88;89;90;132;164;181;186;295;335;336;342;343;519;520;564	184;185;186;187;188;272;322;323;352;366;647;766;767;768;769;770;777;778;779;780;781;782;783;784;785;786;787;1353;1354;1355;1356;1467	185;188;272;323;352;366;647;767;781;1354;1467
sp|Q9S508|PHZB2_PSEAE;sp|O69753|PHZB1_PSEAE	sp|Q9S508|PHZB2_PSEAE;sp|O69753|PHZB1_PSEAE	1;1	1;1	1;1	>sp|Q9S508|PHZB2_PSEAE Phenazine biosynthesis protein PhzB 2 OS=Pseudomonas aeruginosa (strain ATCC 15692 / PAO1 / 1C / PRS 101 / LMG 12228) GN=phzB2 PE=1 SV=1;>sp|O69753|PHZB1_PSEAE Phenazine biosynthesis protein PhzB 1 OS=Pseudomonas aeruginosa (strain A	2	1	1	1	6.2	6.2	6.2	19.027	162	162;162	0	6.0832	854750	1				10	30	TRUE	31	58	132	132
sp|P04739|FMPO_PSEAE	sp|P04739|FMPO_PSEAE	1	1	1	>sp|P04739|FMPO_PSEAE Fimbrial protein OS=Pseudomonas aeruginosa (strain ATCC 15692 / PAO1 / 1C / PRS 101 / LMG 12228) GN=pilA PE=1 SV=1	1	1	1	1	9.4	9.4	9.4	15.512	149	149	0	9.3881	5013000	3				11	237	TRUE	246	475;476	1173;1174;1175	1174
sp|P05384|DBHB_PSEAE	sp|P05384|DBHB_PSEAE	2	2	2	>sp|P05384|DBHB_PSEAE DNA-binding protein HU-beta OS=Pseudomonas aeruginosa (strain ATCC 15692 / PAO1 / 1C / PRS 101 / LMG 12228) GN=hupB PE=1 SV=3	1	2	2	2	32.2	32.2	32.2	9.0865	90	90	0	17.717	13598000	4				12	24;238	True;True	25;247	46;47;477	115;116;117;1176	115;1176
sp|P08308|OTCC_PSEAE	sp|P08308|OTCC_PSEAE	5	5	5	>sp|P08308|OTCC_PSEAE Ornithine carbamoyltransferase, catabolic OS=Pseudomonas aeruginosa (strain ATCC 15692 / PAO1 / 1C / PRS 101 / LMG 12228) GN=arcB PE=1 SV=3	1	5	5	5	20.5	20.5	20.5	38.108	336	336	0	31.949	14850000	14				13	84;89;193;212;222	True;True;True;True;True	87;92;199;220;230	149;155;156;360;361;397;398;443;444	295;302;303;304;305;306;815;816;893;894;1101;1102;1103;1104	295;305;816;894;1101
sp|P09591|EFTU_PSEAE	sp|P09591|EFTU_PSEAE	11	11	11	>sp|P09591|EFTU_PSEAE Elongation factor Tu OS=Pseudomonas aeruginosa (strain ATCC 15692 / PAO1 / 1C / PRS 101 / LMG 12228) GN=tufA PE=1 SV=2	1	11	11	11	39.3	39.3	39.3	43.369	397	397	0	127.74	368920000	107				14	15;20;57;62;107;120;195;210;231;269;294	True;True;True;True;True;True;True;True;True;True;True	15;20;21;59;64;110;124;201;217;218;239;279;304	26;27;33;34;35;36;37;38;39;40;41;42;102;103;110;111;182;183;184;185;208;209;363;364;388;389;390;391;392;393;394;395;460;461;544;545;588;589	63;64;65;66;67;68;69;70;71;72;73;74;75;88;89;90;91;92;93;94;95;96;97;98;99;100;101;102;103;104;105;106;107;108;109;110;111;213;214;225;226;227;228;229;353;354;355;356;357;358;359;360;361;362;363;364;365;437;438;439;440;441;442;443;444;445;818;819;820;821;822;823;824;825;874;875;876;877;878;879;880;881;882;883;884;885;886;887;888;889;890;1135;1136;1137;1138;1411;1412;1504;1505;1506;1507;1508;1509;…	64;97;213;228;358;441;823;890;1137;1411;1510	1;2;3	216;362;372
sp|P11221|OPRI_PSEAE	sp|P11221|OPRI_PSEAE	1	1	1	>sp|P11221|OPRI_PSEAE Major outer membrane lipoprotein OS=Pseudomonas aeruginosa (strain ATCC 15692 / PAO1 / 1C / PRS 101 / LMG 12228) GN=oprI PE=3 SV=1	1	1	1	1	12	12	12	8.8348	83	83	0	9.9387	1047800	3				15	192	TRUE	198	359	812;813;814	813
sp|P11436|AMIE_PSEAE	sp|P11436|AMIE_PSEAE	1	1	1	>sp|P11436|AMIE_PSEAE Aliphatic amidase OS=Pseudomonas aeruginosa (strain ATCC 15692 / PAO1 / 1C / PRS 101 / LMG 12228) GN=amiE PE=1 SV=2	1	1	1	1	3.8	3.8	3.8	38.494	346	346	0	6.0113	127900	1				16	121	TRUE	125	210	446	446
sp|P13794|PORF_PSEAE	sp|P13794|PORF_PSEAE	3	3	3	>sp|P13794|PORF_PSEAE Outer membrane porin F OS=Pseudomonas aeruginosa (strain ATCC 15692 / PAO1 / 1C / PRS 101 / LMG 12228) GN=oprF PE=1 SV=1	1	3	3	3	12.6	12.6	12.6	37.639	350	350	0	30.121	17010000	10				17	67;275;288	True;True;True	70;285;298	120;121;556;557;577;578	246;247;248;1457;1458;1486;1487;1488;1489;1490	248;1457;1486
sp|P13981|ARCA_PSEAE	sp|P13981|ARCA_PSEAE	17	17	17	>sp|P13981|ARCA_PSEAE Arginine deiminase OS=Pseudomonas aeruginosa (strain ATCC 15692 / PAO1 / 1C / PRS 101 / LMG 12228) GN=arcA PE=1 SV=2	1	17	17	17	51.2	51.2	51.2	46.435	418	418	0	178.77	172740000	76				18	18;61;63;81;87;105;149;154;155;224;226;228;254;261;262;282;304	True;True;True;True;True;True;True;True;True;True;True;True;True;True;True;True;True	18;63;65;84;90;108;155;160;161;232;234;236;264;271;272;292;315	31;108;109;112;113;144;145;152;179;180;273;274;280;281;446;447;450;451;456;457;508;509;529;530;531;532;533;534;568;609;610	85;221;222;223;224;230;231;232;233;288;289;290;291;298;299;343;344;345;346;347;348;349;350;351;618;619;627;628;1107;1108;1109;1110;1111;1115;1116;1117;1118;1119;1130;1131;1305;1306;1307;1308;1373;1374;1375;1376;1377;1378;1379;1380;1381;1382;1383;1384;1385;1386;1387;1388;1389;1390;1391;1392;1393;1394;1395;1396;1397;1472;1577;1578;1579;1580;1581;1582	85;224;233;290;299;348;618;627;628;1107;1115;1130;1307;1374;1394;1472;1577
sp|P30718|CH60_PSEAE	sp|P30718|CH60_PSEAE	8	8	8	>sp|P30718|CH60_PSEAE 60 kDa chaperonin OS=Pseudomonas aeruginosa (strain ATCC 15692 / PAO1 / 1C / PRS 101 / LMG 12228) GN=groL PE=1 SV=3	1	8	8	8	30.2	30.2	30.2	57.085	547	547	0	75.475	40290000	26				19	4;17;28;34;35;206;229;276	True;True;True;True;True;True;True;True	4;17;29;36;37;213;237;286	6;7;29;30;55;68;69;70;71;72;383;458;558;559	26;27;28;29;30;31;77;78;79;80;81;82;83;84;129;152;153;154;155;156;157;158;159;869;1132;1459;1460	30;78;129;152;157;869;1132;1459
sp|P37799|BCCP_PSEAE	sp|P37799|BCCP_PSEAE	9	9	9	>sp|P37799|BCCP_PSEAE Biotin carboxyl carrier protein of acetyl-CoA carboxylase OS=Pseudomonas aeruginosa (strain ATCC 15692 / PAO1 / 1C / PRS 101 / LMG 12228) GN=accB PE=3 SV=1	1	9	9	9	62.8	62.8	62.8	16.455	156	156	0	128.35	1155100000	182				20	2;3;156;157;175;176;186;248;256	True;True;True;True;True;True;True;True;True	2;3;162;163;181;182;192;257;258;266	2;3;4;5;282;283;284;285;286;316;317;318;319;320;321;322;323;324;325;326;327;328;329;330;331;332;333;334;348;493;494;495;496;511;512;513;514;515;516;517	2;3;4;5;6;7;8;9;10;11;12;13;14;15;16;17;18;19;20;21;22;23;24;25;629;630;631;632;633;634;635;636;637;638;704;705;706;707;708;709;710;711;712;713;714;715;716;717;718;719;720;721;722;723;724;725;726;727;728;729;730;731;732;733;734;735;736;737;738;739;740;741;742;743;744;745;746;747;748;749;750;751;752;753;754;755;756;757;758;759;760;761;762;763;764;765;794;1197;1198;1199;1200;1201;1202;1203;1204;120…	6;23;635;638;728;764;794;1220;1339	4	87
sp|P43336|PHHC_PSEAE	sp|P43336|PHHC_PSEAE	5	5	5	>sp|P43336|PHHC_PSEAE Aromatic-amino-acid aminotransferase OS=Pseudomonas aeruginosa (strain ATCC 15692 / PAO1 / 1C / PRS 101 / LMG 12228) GN=phhC PE=3 SV=2	1	5	5	5	17.5	17.5	17.5	43.273	399	399	0	37.362	7921000	9				21	6;55;134;159;293	True;True;True;True;True	6;57;139;165;303	10;11;99;228;289;586;587	36;37;38;39;205;476;641;1501;1502;1503	37;205;476;641;1501
sp|P47204|FTSZ_PSEAE	sp|P47204|FTSZ_PSEAE	1	1	1	>sp|P47204|FTSZ_PSEAE Cell division protein FtsZ OS=Pseudomonas aeruginosa (strain ATCC 15692 / PAO1 / 1C / PRS 101 / LMG 12228) GN=ftsZ PE=1 SV=2	1	1	1	1	4.8	4.8	4.8	41.218	394	394	0	12.975	390200	2				22	302	TRUE	313	605;606	1569;1570	1569
sp|P53593|SUCC_PSEAE	sp|P53593|SUCC_PSEAE	9	9	9	>sp|P53593|SUCC_PSEAE Succinyl-CoA ligase [ADP-forming] subunit beta OS=Pseudomonas aeruginosa (strain ATCC 15692 / PAO1 / 1C / PRS 101 / LMG 12228) GN=sucC PE=3 SV=2	1	9	9	9	32.7	32.7	32.7	41.542	388	388	0	129.48	48476000	29				23	13;46;51;85;145;168;220;230;283	True;True;True;True;True;True;True;True;True	13;48;53;88;151;174;228;238;293	22;23;85;86;93;150;251;252;302;440;441;459;569;570;571;572	59;60;175;176;177;178;179;180;181;193;296;510;511;512;655;656;1097;1098;1099;1133;1134;1473;1474;1475;1476;1477;1478;1479;1480	59;176;193;296;511;655;1097;1133;1474
sp|P53641|SODF_PSEAE	sp|P53641|SODF_PSEAE	3	3	3	>sp|P53641|SODF_PSEAE Superoxide dismutase [Fe] OS=Pseudomonas aeruginosa (strain ATCC 15692 / PAO1 / 1C / PRS 101 / LMG 12228) GN=sodB PE=3 SV=3	1	3	3	3	21.8	21.8	21.8	21.351	193	193	0	24.293	10256000	5				24	14;268;318	True;True;True	14;278;329	24;25;543;645	61;62;1410;1679;1680	62;1410;1680
sp|P72173|AAT_PSEAE	sp|P72173|AAT_PSEAE	1	1	1	>sp|P72173|AAT_PSEAE Aspartate aminotransferase OS=Pseudomonas aeruginosa (strain ATCC 15692 / PAO1 / 1C / PRS 101 / LMG 12228) GN=aspC PE=3 SV=2	1	1	1	1	2.8	2.8	2.8	43.319	398	398	0	6.3409	0	1				25	319	TRUE	330	646	1681	1681
sp|Q51561|RPOB_PSEAE	sp|Q51561|RPOB_PSEAE	4	4	4	>sp|Q51561|RPOB_PSEAE DNA-directed RNA polymerase subunit beta OS=Pseudomonas aeruginosa (strain ATCC 15692 / PAO1 / 1C / PRS 101 / LMG 12228) GN=rpoB PE=3 SV=2	1	4	4	4	4.4	4.4	4.4	150.84	1357	1357	0	30.853	6701700	6				26	19;26;37;151	True;True;True;True	19;27;39;157	32;51;52;75;277	86;87;124;125;126;162;624	86;125;162;624
sp|Q51567|SUCD_PSEAE	sp|Q51567|SUCD_PSEAE	3	3	3	>sp|Q51567|SUCD_PSEAE Succinyl-CoA ligase [ADP-forming] subunit alpha OS=Pseudomonas aeruginosa (strain ATCC 15692 / PAO1 / 1C / PRS 101 / LMG 12228) GN=sucD PE=3 SV=2	1	3	3	3	10.5	10.5	10.5	30.266	295	295	0	18.326	4646500	4				27	23;88;241	True;True;True	24;91;250	45;153;154;481	114;300;301;1181	114;301;1181
sp|Q59637|ODP1_PSEAE	sp|Q59637|ODP1_PSEAE	5	5	5	>sp|Q59637|ODP1_PSEAE Pyruvate dehydrogenase E1 component OS=Pseudomonas aeruginosa (strain ATCC 15692 / PAO1 / 1C / PRS 101 / LMG 12228) GN=aceE PE=3 SV=2	1	5	5	5	6.3	6.3	6.3	99.563	882	882	0	35.322	6302700	7				28	66;80;148;242;247	True;True;True;True;True	69;83;154;251;256	119;143;271;272;482;483;492	245;287;616;617;1182;1183;1184;1196	245;287;617;1184;1196
sp|Q9HT16|ATPF_PSEAE	sp|Q9HT16|ATPF_PSEAE	1	1	1	>sp|Q9HT16|ATPF_PSEAE ATP synthase subunit b OS=Pseudomonas aeruginosa (strain ATCC 15692 / PAO1 / 1C / PRS 101 / LMG 12228) GN=atpF PE=3 SV=1	1	1	1	1	7.1	7.1	7.1	16.956	156	156	0	5.8338	222600	1				29	41	TRUE	43	80	170	170
sp|Q9HT18|ATPA_PSEAE	sp|Q9HT18|ATPA_PSEAE	8	8	8	>sp|Q9HT18|ATPA_PSEAE ATP synthase subunit alpha OS=Pseudomonas aeruginosa (strain ATCC 15692 / PAO1 / 1C / PRS 101 / LMG 12228) GN=atpA PE=3 SV=1	1	8	8	8	19.8	19.8	19.8	55.393	514	514	0	62.276	20429000	11				30	100;140;216;251;252;257;280;301	True;True;True;True;True;True;True;True	103;146;224;261;262;267;290;312	172;173;243;244;435;505;506;518;565;604	336;337;500;501;1091;1092;1302;1303;1352;1468;1469;1568	337;501;1092;1302;1303;1352;1469;1568
sp|Q9HU65|GLNA_PSEAE	sp|Q9HU65|GLNA_PSEAE	2	2	2	>sp|Q9HU65|GLNA_PSEAE Glutamine synthetase OS=Pseudomonas aeruginosa (strain ATCC 15692 / PAO1 / 1C / PRS 101 / LMG 12228) GN=glnA PE=1 SV=1	1	2	2	2	8.5	8.5	8.5	51.944	469	469	0	16.665	1775200	4				31	197;223	True;True	203;231	366;445	827;828;1105;1106	827;1106
sp|Q9HU83|HUTU_PSEAE	sp|Q9HU83|HUTU_PSEAE	1	1	1	>sp|Q9HU83|HUTU_PSEAE Urocanate hydratase OS=Pseudomonas aeruginosa (strain ATCC 15692 / PAO1 / 1C / PRS 101 / LMG 12228) GN=hutU PE=1 SV=1	1	1	1	1	2.1	2.1	2.1	61.193	559	559	0	6.2706	0	1				32	287	TRUE	297	576	1485	1485
sp|Q9HV43|DNAK_PSEAE	sp|Q9HV43|DNAK_PSEAE	1	1	1	>sp|Q9HV43|DNAK_PSEAE Chaperone protein DnaK OS=Pseudomonas aeruginosa (strain ATCC 15692 / PAO1 / 1C / PRS 101 / LMG 12228) GN=dnaK PE=3 SV=1	1	1	1	1	3.5	3.5	3.5	68.402	637	637	0	5.5701	1023000	1				33	271	TRUE	281	548	1416	1416
sp|Q9HVA2|ILVC_PSEAE	sp|Q9HVA2|ILVC_PSEAE	1	1	1	>sp|Q9HVA2|ILVC_PSEAE Ketol-acid reductoisomerase OS=Pseudomonas aeruginosa (strain ATCC 15692 / PAO1 / 1C / PRS 101 / LMG 12228) GN=ilvC PE=1 SV=1	1	1	1	1	5.6	5.6	5.6	36.424	338	338	0	5.7363	958460	1				34	103	TRUE	106	176	340	340
sp|Q9HVY3|RS9_PSEAE	sp|Q9HVY3|RS9_PSEAE	1	1	1	>sp|Q9HVY3|RS9_PSEAE 30S ribosomal protein S9 OS=Pseudomonas aeruginosa (strain ATCC 15692 / PAO1 / 1C / PRS 101 / LMG 12228) GN=rpsI PE=3 SV=1	1	1	1	1	7.7	7.7	7.7	14.615	130	130	0	7.0991	2043100	2				35	27	TRUE	28	53;54	127;128	128
sp|Q9HWC9|RPOC_PSEAE	sp|Q9HWC9|RPOC_PSEAE	1	1	1	>sp|Q9HWC9|RPOC_PSEAE DNA-directed RNA polymerase subunit beta OS=Pseudomonas aeruginosa (strain ATCC 15692 / PAO1 / 1C / PRS 101 / LMG 12228) GN=rpoC PE=3 SV=1	1	1	1	1	0.7	0.7	0.7	154.38	1399	1399	0	5.9621	974540	2				36	138	TRUE	143	235;236	486;487	486
sp|Q9HWD2|EFG1_PSEAE;sp|Q9I244|EFG2_PSEAE	sp|Q9HWD2|EFG1_PSEAE	7;3	7;3	7;3	>sp|Q9HWD2|EFG1_PSEAE Elongation factor G 1 OS=Pseudomonas aeruginosa (strain ATCC 15692 / PAO1 / 1C / PRS 101 / LMG 12228) GN=fusA PE=1 SV=1	2	7	7	7	15.2	15.2	15.2	77.784	706	706;702	0	63.758	13351000	10				37	12;76;116;117;163;219;305	True;True;True;True;True;True;True	12;79;120;121;169;227;316	21;136;202;203;204;293;294;439;611;612	57;58;277;429;430;431;645;646;1096;1583;1584	57;277;429;430;645;1096;1584
sp|Q9HWD8|RL2_PSEAE	sp|Q9HWD8|RL2_PSEAE	2	2	2	>sp|Q9HWD8|RL2_PSEAE 50S ribosomal protein L2 OS=Pseudomonas aeruginosa (strain ATCC 15692 / PAO1 / 1C / PRS 101 / LMG 12228) GN=rplB PE=3 SV=1	1	2	2	2	11.4	11.4	11.4	29.579	273	273	0	15.63	5642400	4				38	47;115	True;True	49;119	87;200;201	182;183;427;428	182;428
sp|Q9HWE8|RS14_PSEAE	sp|Q9HWE8|RS14_PSEAE	1	1	1	>sp|Q9HWE8|RS14_PSEAE 30S ribosomal protein S14 OS=Pseudomonas aeruginosa (strain ATCC 15692 / PAO1 / 1C / PRS 101 / LMG 12228) GN=rpsN PE=3 SV=1	1	1	1	1	12.9	12.9	12.9	11.565	101	101	0	5.9081	293340	1				39	21	TRUE	22	43	112	112
sp|Q9HXN2|PUR4_PSEAE	sp|Q9HXN2|PUR4_PSEAE	1	1	1	>sp|Q9HXN2|PUR4_PSEAE Phosphoribosylformylglycinamidine synthase OS=Pseudomonas aeruginosa (strain ATCC 15692 / PAO1 / 1C / PRS 101 / LMG 12228) GN=purL PE=3 SV=1	1	1	1	1	1.1	1.1	1.1	140.65	1298	1298	0	6.8819	404380	3				40	299	TRUE	310	601;602	1564;1565;1566	1565
sp|Q9HXZ4|PYRG_PSEAE	sp|Q9HXZ4|PYRG_PSEAE	1	1	1	>sp|Q9HXZ4|PYRG_PSEAE CTP synthase OS=Pseudomonas aeruginosa (strain ATCC 15692 / PAO1 / 1C / PRS 101 / LMG 12228) GN=pyrG PE=3 SV=1	1	1	1	1	2.4	2.4	2.4	59.617	542	542	0	9.0781	589250	3				41	270	TRUE	280	546;547	1413;1414;1415	1413
sp|Q9HZ71|RS1_PSEAE	sp|Q9HZ71|RS1_PSEAE	3	3	3	>sp|Q9HZ71|RS1_PSEAE 30S ribosomal protein S1 OS=Pseudomonas aeruginosa (strain ATCC 15692 / PAO1 / 1C / PRS 101 / LMG 12228) GN=rpsA PE=3 SV=1	1	3	3	3	7.2	7.2	7.2	61.869	559	559	0	24.375	2911100	3				42	72;96;102	True;True;True	75;99;105	131;165;175	271;324;325;339	271;325;339
sp|Q9HZE0|DHE2_PSEAE	sp|Q9HZE0|DHE2_PSEAE	13	13	13	>sp|Q9HZE0|DHE2_PSEAE NAD-specific glutamate dehydrogenase OS=Pseudomonas aeruginosa (strain ATCC 15692 / PAO1 / 1C / PRS 101 / LMG 12228) GN=gdhB PE=1 SV=1	1	13	13	13	12	12	12	182.64	1620	1620	0	119.83	28001000	28				43	7;40;56;86;142;162;172;185;200;208;264;285;317	True;True;True;True;True;True;True;True;True;True;True;True;True	7;42;58;89;148;168;178;191;206;215;274;295;328	12;79;100;101;151;247;292;310;311;347;371;372;385;537;538;574;644	40;169;206;207;208;209;210;211;212;297;505;644;691;692;693;694;793;834;835;836;837;838;871;1403;1404;1405;1483;1678	40;169;207;297;505;644;691;793;834;871;1403;1483;1678
sp|Q9HZJ2|FADB_PSEAE	sp|Q9HZJ2|FADB_PSEAE	1	1	1	>sp|Q9HZJ2|FADB_PSEAE Fatty acid oxidation complex subunit alpha OS=Pseudomonas aeruginosa (strain ATCC 15692 / PAO1 / 1C / PRS 101 / LMG 12228) GN=fadB PE=3 SV=1	1	1	1	1	2.7	2.7	2.7	76.953	715	715	0	13.826	596620	1				44	101	TRUE	104	174	338	338
sp|Q9I0J6|NUOG_PSEAE	sp|Q9I0J6|NUOG_PSEAE	1	1	1	>sp|Q9I0J6|NUOG_PSEAE NADH-quinone oxidoreductase subunit G OS=Pseudomonas aeruginosa (strain ATCC 15692 / PAO1 / 1C / PRS 101 / LMG 12228) GN=nuoG PE=3 SV=1	1	1	1	1	1.1	1.1	1.1	98.999	905	905	0	5.5908	1010300	1				45	45	TRUE	47	84	174	174
sp|Q9I0K4|ACEA_PSEAE	sp|Q9I0K4|ACEA_PSEAE	7	7	7	>sp|Q9I0K4|ACEA_PSEAE Isocitrate lyase OS=Pseudomonas aeruginosa (strain ATCC 15692 / PAO1 / 1C / PRS 101 / LMG 12228) GN=PA2634 PE=1 SV=1	1	7	7	7	18.1	18.1	18.1	58.886	531	531	0	82.926	24513000	24				46	82;119;183;198;218;259;300	True;True;True;True;True;True;True	85;123;189;204;226;269;311	146;147;207;344;345;367;368;437;438;521;522;523;524;603	292;293;435;436;788;789;790;791;829;830;831;1094;1095;1357;1358;1359;1360;1361;1362;1363;1364;1365;1366;1567	293;435;791;831;1094;1364;1567
sp|Q9I2A8|ATOB_PSEAE	sp|Q9I2A8|ATOB_PSEAE	1	1	1	>sp|Q9I2A8|ATOB_PSEAE Acetyl-CoA acetyltransferase OS=Pseudomonas aeruginosa (strain ATCC 15692 / PAO1 / 1C / PRS 101 / LMG 12228) GN=atoB PE=3 SV=1	1	1	1	1	3.3	3.3	3.3	40.405	393	393	0	6.2109	571320	0				47	75	TRUE	78	135	276	276
sp|Q9I2V5|ACNB_PSEAE	sp|Q9I2V5|ACNB_PSEAE	7	7	7	>sp|Q9I2V5|ACNB_PSEAE Aconitate hydratase B OS=Pseudomonas aeruginosa (strain ATCC 15692 / PAO1 / 1C / PRS 101 / LMG 12228) GN=acnB PE=3 SV=1	1	7	7	7	11.7	11.7	11.7	93.627	869	869	0	59.012	15526000	13				48	11;60;169;189;209;253;295	True;True;True;True;True;True;True	11;62;175;195;216;263;305	20;106;107;303;353;354;386;387;507;590;591	56;217;218;219;220;657;658;801;802;872;873;1304;1514;1515	56;218;657;802;872;1304;1514
sp|Q9I3D1|DLDH2_PSEAE	sp|Q9I3D1|DLDH2_PSEAE	6	6	6	>sp|Q9I3D1|DLDH2_PSEAE Dihydrolipoyl dehydrogenase OS=Pseudomonas aeruginosa (strain ATCC 15692 / PAO1 / 1C / PRS 101 / LMG 12228) GN=lpdG PE=3 SV=1	1	6	6	6	19.9	19.9	19.9	50.164	478	478	0	46.113	12095000	8				49	10;31;42;44;118;232	True;True;True;True;True;True	10;32;44;46;122;240	18;19;59;81;83;205;206;462	54;55;133;171;173;432;433;434;1139	54;133;171;173;434;1139
sp|Q9I3F5|ACNA_PSEAE	sp|Q9I3F5|ACNA_PSEAE	8	8	8	>sp|Q9I3F5|ACNA_PSEAE Aconitate hydratase A OS=Pseudomonas aeruginosa (strain ATCC 15692 / PAO1 / 1C / PRS 101 / LMG 12228) GN=acnA PE=3 SV=1	1	8	8	8	14.1	14.1	14.1	99.147	910	910	0	65.815	12371000	14				50	78;161;266;272;273;284;286;316	True;True;True;True;True;True;True;True	81;167;276;282;283;294;296;327	139;140;291;540;549;550;551;573;575;643	280;281;282;283;643;1407;1417;1418;1419;1420;1481;1482;1484;1677	282;643;1407;1417;1418;1481;1484;1677
sp|Q9I576|HPPD_PSEAE	sp|Q9I576|HPPD_PSEAE	1	1	1	>sp|Q9I576|HPPD_PSEAE 4-hydroxyphenylpyruvate dioxygenase OS=Pseudomonas aeruginosa (strain ATCC 15692 / PAO1 / 1C / PRS 101 / LMG 12228) GN=hpd PE=3 SV=1	1	1	1	1	4.2	4.2	4.2	39.912	357	357	0	12.956	1778400	3				51	215	TRUE	223	433;434	1088;1089;1090	1088
sp|Q9I685|SAHH_PSEAE	sp|Q9I685|SAHH_PSEAE	7	7	7	>sp|Q9I685|SAHH_PSEAE Adenosylhomocysteinase OS=Pseudomonas aeruginosa (strain ATCC 15692 / PAO1 / 1C / PRS 101 / LMG 12228) GN=ahcY PE=3 SV=1	1	7	7	7	20.7	20.7	20.7	51.399	469	469	0	47.188	15840000	10				52	83;99;136;144;196;234;307	True;True;True;True;True;True;True	86;102;141;150;202;242;318	148;170;171;231;232;249;250;365;466;614	294;334;335;479;480;481;482;507;508;509;826;1145;1586	294;335;481;509;826;1145;1586
sp|Q9I6M5|DAVD_PSEAE	sp|Q9I6M5|DAVD_PSEAE	1	1	1	>sp|Q9I6M5|DAVD_PSEAE Glutarate-semialdehyde dehydrogenase DavD OS=Pseudomonas aeruginosa (strain ATCC 15692 / PAO1 / 1C / PRS 101 / LMG 12228) GN=davD PE=1 SV=1	1	1	1	1	3.1	3.1	3.1	51.622	483	483	0	9.372	1483200	1				53	289	TRUE	299	579	1491	1491
tr|Q9HTD0|Q9HTD0_PSEAE	tr|Q9HTD0|Q9HTD0_PSEAE	1	1	1	>tr|Q9HTD0|Q9HTD0_PSEAE Probable biotin carboxylase subunit of a transcarboxylase OS=Pseudomonas aeruginosa (strain ATCC 15692 / PAO1 / 1C / PRS 101 / LMG 12228) GN=PA5436 PE=4 SV=1	1	1	1	1	2.1	2.1	2.1	51.848	471	471	0	6.4171	0	1				54	91	TRUE	94	158	308	308
tr|Q9HTD1|Q9HTD1_PSEAE	tr|Q9HTD1|Q9HTD1_PSEAE	32	32	32	>tr|Q9HTD1|Q9HTD1_PSEAE Probable transcarboxylase subunit OS=Pseudomonas aeruginosa (strain ATCC 15692 / PAO1 / 1C / PRS 101 / LMG 12228) GN=PA5435 PE=4 SV=1	1	32	32	32	57.7	57.7	57.7	66.095	607	607	0	300.63	879810000	294				55	5;8;32;33;38;39;50;54;64;71;94;97;110;113;114;126;128;133;158;203;227;235;236;263;290;296;297;298;311;312;313;314	True;True;True;True;True;True;True;True;True;True;True;True;True;True;True;True;True;True;True;True;True;True;True;True;True;True;True;True;True;True;True;True	5;8;33;34;35;40;41;52;56;66;67;74;97;100;113;116;117;118;130;132;137;138;164;209;210;235;243;244;245;273;300;306;307;308;309;322;323;324;325	8;9;13;14;15;60;61;62;63;64;65;66;67;76;77;78;91;92;96;97;98;114;115;116;117;127;128;129;130;162;163;166;167;189;190;194;195;196;197;198;199;216;218;224;225;226;227;287;288;377;378;379;380;452;453;454;455;467;468;469;470;471;472;473;474;535;536;580;581;592;593;594;595;596;597;598;599;600;631;632;633;634;635;636;637;638;639;640;641	32;33;34;35;41;42;43;44;45;46;47;48;49;50;51;134;135;136;137;138;139;140;141;142;143;144;145;146;147;148;149;150;151;163;164;165;166;167;168;189;190;191;192;199;200;201;202;203;204;234;235;236;237;238;239;240;241;242;243;256;257;258;259;260;261;262;263;264;265;266;267;268;269;270;319;320;321;326;327;328;329;330;369;370;371;372;373;374;375;376;377;381;382;383;384;385;386;387;388;389;390;391;392;39…	33;42;138;148;164;168;189;199;242;262;321;329;371;392;417;452;455;467;640;853;1127;1147;1170;1399;1492;1516;1550;1555;1650;1654;1664;1673	5;6;7;8;9;10;11;12	125;169;172;182;274;306;323;435
tr|Q9HTD9|Q9HTD9_PSEAE	tr|Q9HTD9|Q9HTD9_PSEAE	1	1	1	>tr|Q9HTD9|Q9HTD9_PSEAE Alcohol dehydrogenase OS=Pseudomonas aeruginosa (strain ATCC 15692 / PAO1 / 1C / PRS 101 / LMG 12228) GN=adhA PE=1 SV=1	1	1	1	1	5	5	5	35.911	342	342	0	5.7433	1232700	2				56	131	TRUE	135	222	461;462	461
tr|Q9HTP2|Q9HTP2_PSEAE	tr|Q9HTP2|Q9HTP2_PSEAE	1	1	1	>tr|Q9HTP2|Q9HTP2_PSEAE Probable aldehyde dehydrogenase OS=Pseudomonas aeruginosa (strain ATCC 15692 / PAO1 / 1C / PRS 101 / LMG 12228) GN=PA5312 PE=3 SV=1	1	1	1	1	3.6	3.6	3.6	53.143	497	497	0	5.8889	719450	1				57	153	TRUE	159	279	626	626
tr|Q9HU07|Q9HU07_PSEAE	tr|Q9HU07|Q9HU07_PSEAE	1	1	1	>tr|Q9HU07|Q9HU07_PSEAE Uncharacterized protein OS=Pseudomonas aeruginosa (strain ATCC 15692 / PAO1 / 1C / PRS 101 / LMG 12228) GN=PA5182 PE=4 SV=1	1	1	1	1	37.2	37.2	37.2	14.115	137	137	0	5.8873	33939000	6				58	260	TRUE	270	525;526;527;528	1367;1368;1369;1370;1371;1372	1370
tr|Q9HUD3|Q9HUD3_PSEAE	tr|Q9HUD3|Q9HUD3_PSEAE	1	1	1	>tr|Q9HUD3|Q9HUD3_PSEAE Malic enzyme OS=Pseudomonas aeruginosa (strain ATCC 15692 / PAO1 / 1C / PRS 101 / LMG 12228) GN=PA5046 PE=4 SV=1	1	1	1	1	3.3	3.3	3.3	45.428	422	422	0	7.2048	620960	1				59	1	TRUE	1	1	1	1
tr|Q9HUK6|Q9HUK6_PSEAE	tr|Q9HUK6|Q9HUK6_PSEAE	1	1	1	>tr|Q9HUK6|Q9HUK6_PSEAE FimX OS=Pseudomonas aeruginosa (strain ATCC 15692 / PAO1 / 1C / PRS 101 / LMG 12228) GN=fimX PE=1 SV=1	1	1	1	1	1	1	1	75.992	691	691	0	5.5355	0	1				60	0	TRUE	0	0	0	0
tr|Q9HW49|Q9HW49_PSEAE	tr|Q9HW49|Q9HW49_PSEAE	3	3	3	>tr|Q9HW49|Q9HW49_PSEAE Uncharacterized protein OS=Pseudomonas aeruginosa (strain ATCC 15692 / PAO1 / 1C / PRS 101 / LMG 12228) GN=PA4352 PE=3 SV=1	1	3	3	3	23.8	23.8	23.8	30.972	286	286	0	21.668	2055600	6				61	52;160;277	True;True;True	54;166;287	94;290;560;561	194;642;1461;1462;1463;1464	194;642;1461
tr|Q9HWV0|Q9HWV0_PSEAE	tr|Q9HWV0|Q9HWV0_PSEAE	4	4	4	>tr|Q9HWV0|Q9HWV0_PSEAE Probable nonribosomal peptide synthetase OS=Pseudomonas aeruginosa (strain ATCC 15692 / PAO1 / 1C / PRS 101 / LMG 12228) GN=PA4078 PE=4 SV=1	1	4	4	4	5.7	5.7	5.7	110.35	991	991	0	34.885	2075400	6				62	65;79;240;315	True;True;True;True	68;82;249;326	118;141;142;480;642	244;284;285;286;1180;1676	244;284;1180;1676
tr|Q9HY13|Q9HY13_PSEAE	tr|Q9HY13|Q9HY13_PSEAE	1	1	1	>tr|Q9HY13|Q9HY13_PSEAE Uncharacterized protein OS=Pseudomonas aeruginosa (strain ATCC 15692 / PAO1 / 1C / PRS 101 / LMG 12228) GN=PA3613 PE=4 SV=1	1	1	1	1	1.4	1.4	1.4	88.378	801	801	0	7.1734	536880	2				63	278	TRUE	288	562;563	1465;1466	1465
tr|Q9HY81|Q9HY81_PSEAE	tr|Q9HY81|Q9HY81_PSEAE	3	3	3	>tr|Q9HY81|Q9HY81_PSEAE Probable peroxidase OS=Pseudomonas aeruginosa (strain ATCC 15692 / PAO1 / 1C / PRS 101 / LMG 12228) GN=PA3529 PE=1 SV=1	1	3	3	3	15.5	15.5	15.5	21.822	200	200	0	28.329	9920200	9				64	53;221;249	True;True;True	55;229;259	95;442;497;498	195;196;197;198;1100;1240;1241;1242;1243	196;1100;1243
tr|Q9HYT5|Q9HYT5_PSEAE	tr|Q9HYT5|Q9HYT5_PSEAE	2	2	2	>tr|Q9HYT5|Q9HYT5_PSEAE Uncharacterized protein OS=Pseudomonas aeruginosa (strain ATCC 15692 / PAO1 / 1C / PRS 101 / LMG 12228) GN=PA3309 PE=3 SV=1	1	2	2	2	15.2	15.2	15.2	16.496	151	151	0	12.611	8017100	2				65	143;281	True;True	149;291	248;566;567	506;1470;1471	506;1471
tr|Q9I0L5|Q9I0L5_PSEAE	tr|Q9I0L5|Q9I0L5_PSEAE	4	4	4	>tr|Q9I0L5|Q9I0L5_PSEAE Isocitrate dehydrogenase [NADP] OS=Pseudomonas aeruginosa (strain ATCC 15692 / PAO1 / 1C / PRS 101 / LMG 12228) GN=icd PE=3 SV=1	1	4	4	4	11.2	11.2	11.2	45.577	418	418	0	33.784	6899700	10				66	29;109;291;306	True;True;True;True	30;112;301;317	56;57;187;188;582;583;584;613	130;131;367;368;1495;1496;1497;1498;1499;1585	130;368;1498;1585
tr|Q9I0T1|Q9I0T1_PSEAE	tr|Q9I0T1|Q9I0T1_PSEAE	4	4	4	>tr|Q9I0T1|Q9I0T1_PSEAE Probable acyl-CoA thiolase OS=Pseudomonas aeruginosa (strain ATCC 15692 / PAO1 / 1C / PRS 101 / LMG 12228) GN=PA2553 PE=3 SV=1	1	4	4	4	13.9	13.9	13.9	41.4	396	396	0	45.8	7813400	9				67	69;74;152;267	True;True;True;True	72;77;158;277	123;124;133;134;278;541;542	250;251;252;273;274;275;625;1408;1409	250;273;625;1409
tr|Q9I246|Q9I246_PSEAE	tr|Q9I246|Q9I246_PSEAE	10	10	10	>tr|Q9I246|Q9I246_PSEAE Probable carbamoyl transferase OS=Pseudomonas aeruginosa (strain ATCC 15692 / PAO1 / 1C / PRS 101 / LMG 12228) GN=PA2069 PE=4 SV=1	1	10	10	10	22.6	22.6	22.6	63.382	574	574	0	78.45	19403000	22				68	59;122;123;127;150;180;225;233;239;243	True;True;True;True;True;True;True;True;True;True	61;126;127;131;156;186;233;241;248;252	105;211;212;217;275;276;340;448;449;463;464;465;478;479;484	216;447;448;453;620;621;622;623;775;1112;1113;1114;1140;1141;1142;1143;1144;1177;1178;1179;1185;1186	216;447;448;453;622;775;1112;1140;1179;1185
tr|Q9I297|Q9I297_PSEAE	tr|Q9I297|Q9I297_PSEAE	1	1	1	>tr|Q9I297|Q9I297_PSEAE Methylcrotonyl-CoA carboxylase, beta-subunit OS=Pseudomonas aeruginosa (strain ATCC 15692 / PAO1 / 1C / PRS 101 / LMG 12228) GN=liuB PE=1 SV=1	1	1	1	1	2.2	2.2	2.2	57.433	535	535	0	7.9843	0	1				69	16	TRUE	16	28	76	76
tr|Q9I299|Q9I299_PSEAE	tr|Q9I299|Q9I299_PSEAE	15	15	15	>tr|Q9I299|Q9I299_PSEAE Methylcrotonyl-CoA carboxylase, alpha-subunit (Biotin-containing) OS=Pseudomonas aeruginosa (strain ATCC 15692 / PAO1 / 1C / PRS 101 / LMG 12228) GN=liuD PE=1 SV=1	1	15	15	15	33.7	33.7	33.7	71.282	655	655	0	121.56	90112000	40				70	25;70;77;98;124;125;135;137;141;165;174;179;199;265;303	True;True;True;True;True;True;True;True;True;True;True;True;True;True;True	26;73;80;101;128;129;140;142;147;171;180;185;205;275;314	48;49;50;125;126;137;138;168;169;213;214;215;229;230;233;234;245;246;296;297;314;315;338;339;369;370;539;607;608	118;119;120;121;122;123;253;254;255;278;279;331;332;333;449;450;451;477;478;483;484;485;502;503;504;648;649;702;703;773;774;832;833;1406;1571;1572;1573;1574;1575;1576	118;253;278;333;449;451;478;485;503;649;702;773;832;1406;1572
tr|Q9I3D3|Q9I3D3_PSEAE	tr|Q9I3D3|Q9I3D3_PSEAE	5	5	5	>tr|Q9I3D3|Q9I3D3_PSEAE 2-oxoglutarate dehydrogenase (E1 subunit) OS=Pseudomonas aeruginosa (strain ATCC 15692 / PAO1 / 1C / PRS 101 / LMG 12228) GN=sucA PE=4 SV=1	1	5	5	5	9	9	9	105.88	943	943	0	32.493	8886500	12				71	58;187;188;202;204	True;True;True;True;True	60;193;194;208;211	104;349;350;351;352;375;376;381	215;795;796;797;798;799;800;841;842;843;844;845;867	215;796;799;843;867
tr|Q9I3D4|Q9I3D4_PSEAE	tr|Q9I3D4|Q9I3D4_PSEAE	2	2	2	>tr|Q9I3D4|Q9I3D4_PSEAE Succinate dehydrogenase (B subunit) OS=Pseudomonas aeruginosa (strain ATCC 15692 / PAO1 / 1C / PRS 101 / LMG 12228) GN=sdhB PE=4 SV=1	1	2	2	2	10.2	10.2	10.2	26.155	235	235	0	14.216	923950	2				72	68;93	True;True	71;96	122;161	249;318	249;318
tr|Q9I3D5|Q9I3D5_PSEAE	tr|Q9I3D5|Q9I3D5_PSEAE	4	4	4	>tr|Q9I3D5|Q9I3D5_PSEAE Succinate dehydrogenase flavoprotein subunit OS=Pseudomonas aeruginosa (strain ATCC 15692 / PAO1 / 1C / PRS 101 / LMG 12228) GN=sdhA PE=3 SV=1	1	4	4	4	8	8	8	63.531	590	590	0	42.384	19392000	14				73	104;129;130;173	True;True;True;True	107;133;134;179	177;178;219;220;221;312;313	341;342;456;457;458;459;460;695;696;697;698;699;700;701	342;456;459;697
tr|Q9I580|Q9I580_PSEAE	tr|Q9I580|Q9I580_PSEAE	1	1	1	>tr|Q9I580|Q9I580_PSEAE Uncharacterized protein OS=Pseudomonas aeruginosa (strain ATCC 15692 / PAO1 / 1C / PRS 101 / LMG 12228) GN=PA0861 PE=4 SV=1	1	1	1	1	2.3	2.3	2.3	91.205	818	818	1	-2	952070	1	+			74	207	TRUE	214	384	870	870	13	157
tr|Q9I5U9|Q9I5U9_PSEAE	tr|Q9I5U9|Q9I5U9_PSEAE	8	8	8	>tr|Q9I5U9|Q9I5U9_PSEAE Uncharacterized protein OS=Pseudomonas aeruginosa (strain ATCC 15692 / PAO1 / 1C / PRS 101 / LMG 12228) GN=PA0588 PE=4 SV=1	1	8	8	8	13.1	13.1	13.1	73.722	640	640	0	64.171	11137000	11				75	36;178;181;184;201;205;217;292	True;True;True;True;True;True;True;True	38;184;187;190;207;212;225;302	73;74;337;341;346;373;374;382;436;585	160;161;771;772;776;792;839;840;868;1093;1500	160;772;776;792;840;868;1093;1500
tr|Q9I659|Q9I659_PSEAE	tr|Q9I659|Q9I659_PSEAE	1	1	1	>tr|Q9I659|Q9I659_PSEAE Probable ClpA/B protease ATP binding subunit OS=Pseudomonas aeruginosa (strain ATCC 15692 / PAO1 / 1C / PRS 101 / LMG 12228) GN=PA0459 PE=4 SV=1	1	1	1	1	1.5	1.5	1.5	94.174	850	850	0	6.0552	236250	1				76	214	TRUE	222	432	1087	1087
tr|Q9I671|Q9I671_PSEAE	tr|Q9I671|Q9I671_PSEAE	1	1	1	>tr|Q9I671|Q9I671_PSEAE Glutaryl-CoA dehydrogenase OS=Pseudomonas aeruginosa (strain ATCC 15692 / PAO1 / 1C / PRS 101 / LMG 12228) GN=gcdH PE=3 SV=1	1	1	1	1	4.3	4.3	4.3	43.311	393	393	0	9.6764	574740	2				77	211	TRUE	219	396	891;892	892
tr|Q9I6Z3|Q9I6Z3_PSEAE	tr|Q9I6Z3|Q9I6Z3_PSEAE	3	3	3	>tr|Q9I6Z3|Q9I6Z3_PSEAE Alkyl hydroperoxide reductase subunit C OS=Pseudomonas aeruginosa (strain ATCC 15692 / PAO1 / 1C / PRS 101 / LMG 12228) GN=ahpC PE=4 SV=1	1	3	3	3	17.6	17.6	17.6	20.541	187	187	0	25.003	8884600	5				78	90;112;245	True;True;True	93;115;254	157;192;193;488;489	307;379;380;1192;1193	307;379;1193

## Sheet: 6-1 proteinGroups Probe 12
Protein IDs	Majority protein IDs	Peptide counts (all)	Peptide counts (razor+unique)	Peptide counts (unique)	Fasta headers	Number of proteins	Peptides	Razor + unique peptides	Unique peptides	Sequence coverage [%]	Unique + razor sequence coverage [%]	Unique sequence coverage [%]	Mol. weight [kDa]	Sequence length	Sequence lengths	Q-value	Score	Intensity	MS/MS Count	Only identified by site	Reverse	Potential contaminant	id	Peptide IDs	Peptide is razor	Mod. peptide IDs	Evidence IDs	MS/MS IDs	Best MS/MS	Oxidation (M) site IDs	Oxidation (M) site positions
CON__P00761	CON__P00761	4	4	4	>P00761 SWISS-PROT:P00761|TRYP_PIG Trypsin - Sus scrofa (Pig).	1	4	4	4	25.1	25.1	25.1	24.409	231	231	0	65.86	938330000	78			+	0	203;253;289;427	True;True;True;True	211;212;262;299;443	352;353;354;355;356;460;461;462;463;543;544;813;814;815	700;701;702;703;704;705;706;707;708;709;710;711;897;898;899;900;901;902;903;904;905;906;907;908;909;910;911;912;913;914;915;916;917;918;919;920;921;922;923;924;1051;1052;1053;1054;1055;1056;1057;1058;1059;1722;1723;1724;1725;1726;1727;1728;1729;1730;1731;1732;1733;1734;1735;1736;1737;1738;1739;1740;1741;1742;1743;1744;1745;1746;1747;1748;1749;1750;1751	705;921;1053;1739	0	94
CON__P04264;CON__Q9R0H5;CON__Q6NXH9;CON__Q8BGZ7;CON__P50446;CON__Q6IFZ6;CON__Q7Z794;CON__Q922U2;CON__Q5XQN5;CON__ENSEMBL:ENSBTAP00000038253;CON__P35908	CON__P04264	3;1;1;1;1;1;1;1;1;1;1	3;1;1;1;1;1;1;1;1;1;1	3;1;1;1;1;1;1;1;1;1;1	>P04264 SWISS-PROT:P04264 Tax_Id=9606 Gene_Symbol=KRT1 Keratin, type II cytoskeletal 1	11	3	3	3	5.3	5.3	5.3	66.017	644	644;524;539;551;553;572;578;580;601;606;645	0	39.88	11853000	9			+	1	128;377;491	True;True;True	134;392;510	233;234;727;728;945	475;476;477;478;479;1495;1496;2001;2002	475;1495;2001
CON__P07477	CON__P07477	1	1	1	>P07477 SWISS-PROT:P07477 Tax_Id=9606 Gene_Symbol=PRSS1 Trypsin-1 precursor	1	1	1	1	8.1	8.1	8.1	26.558	247	247	0.0072993	5.419	10128000	1			+	2	254	TRUE	263	464	925	925
CON__P13645;CON__P02535-1	CON__P13645;CON__P02535-1	3;2	3;2	3;2	>P13645 SWISS-PROT:P13645 Tax_Id=9606 Gene_Symbol=KRT10 Keratin, type I cytoskeletal 10;>P02535-1 SWISS-PROT:P02535-1 Tax_Id=10090 Gene_Symbol=Krt10 Isoform 1 of Keratin, type I cytoskeletal 10	2	3	3	3	5.4	5.4	5.4	59.51	593	593;570	0	24.417	4478400	7			+	3	30;245;385	True;True;True	32;254;401	59;448;449;741	163;880;881;882;883;1544;1545	163;881;1545
CON__Q28107	CON__Q28107	1	1	1	>Q28107 SWISS-PROT:Q28107 (Bos taurus) Coagulation factor V precursor	1	1	1	1	0.6	0.6	0.6	248.98	2211	2211	0	5.5415	3308400	2			+	4	392	TRUE	408	756;757	1598;1599	1599
CON__Streptavidin	CON__Streptavidin	4	4	4	>Streptavidin (S.avidinii)	1	4	4	4	43.1	43.1	43.1	16.622	160	160	0	106.61	2033100000	319			+	5	214;324;386;490	True;True;True;True	223;338;402;509	373;374;375;376;377;378;379;380;381;382;383;384;385;386;387;388;389;390;391;392;393;394;395;396;397;398;399;400;401;402;608;609;610;611;612;613;614;615;616;617;618;619;620;621;622;623;624;625;626;627;628;629;630;631;632;633;634;635;636;637;638;639;742;743;744;745;922;923;924;925;926;927;928;929;930;931;932;933;934;935;936;937;938;939;940;941;942;943;944	738;739;740;741;742;743;744;745;746;747;748;749;750;751;752;753;754;755;756;757;758;759;760;761;762;763;764;765;766;767;768;769;770;771;772;773;774;775;776;777;778;779;780;781;782;783;784;785;786;787;788;789;790;791;792;793;794;795;796;797;798;799;800;801;802;803;804;805;806;807;808;809;810;811;812;813;1196;1197;1198;1199;1200;1201;1202;1203;1204;1205;1206;1207;1208;1209;1210;1211;1212;1213;1214;…	804;1222;1546;1948
REV__tr|Q9HXW2|Q9HXW2_PSEAE	REV__tr|Q9HXW2|Q9HXW2_PSEAE	1	1	1	>tr|Q9HXW2|Q9HXW2_PSEAE Probable transcriptional regulator OS=Pseudomonas aeruginosa (strain ATCC 15692 / PAO1 / 1C / PRS 101 / LMG 12228) GN=PA3678 PE=4 SV=1	1	1	1	1	0	0	0	23.15	212	212	0.008	5.5313	89973000	9		+		6	230	TRUE	239	427;428	850;851;852;853;854;855;856;857;858	850
sp|G3XD23|WBPB_PSEAE	sp|G3XD23|WBPB_PSEAE	1	1	1	>sp|G3XD23|WBPB_PSEAE UDP-N-acetyl-2-amino-2-deoxy-D-glucuronate oxidase OS=Pseudomonas aeruginosa (strain ATCC 15692 / PAO1 / 1C / PRS 101 / LMG 12228) GN=wbpB PE=1 SV=1	1	1	1	1	6.6	6.6	6.6	35.717	316	316	0.0076336	5.4674	1744000	2				7	361	TRUE	375	702	1445;1446	1445
sp|O52759|RS4_PSEAE	sp|O52759|RS4_PSEAE	2	2	2	>sp|O52759|RS4_PSEAE 30S ribosomal protein S4 OS=Pseudomonas aeruginosa (strain ATCC 15692 / PAO1 / 1C / PRS 101 / LMG 12228) GN=rpsD PE=3 SV=2	1	2	2	2	12.6	12.6	12.6	23.277	206	206	0	21.663	14290000	4				8	26;288	True;True	28;298	52;53;541;542	155;156;1049;1050	156;1049
sp|O52762|CATA_PSEAE	sp|O52762|CATA_PSEAE	7	7	7	>sp|O52762|CATA_PSEAE Catalase OS=Pseudomonas aeruginosa (strain ATCC 15692 / PAO1 / 1C / PRS 101 / LMG 12228) GN=katA PE=1 SV=1	1	7	7	7	19.5	19.5	19.5	55.588	482	482	0	74.32	24227000	13				9	93;162;164;246;261;291;322	True;True;True;True;True;True;True	99;168;170;255;270;301;336	175;284;288;289;450;451;475;547;548;605	379;556;566;567;568;884;885;948;1067;1068;1069;1070;1192	379;556;567;885;948;1070;1192
sp|O68822|AMPA_PSEAE	sp|O68822|AMPA_PSEAE	10	10	10	>sp|O68822|AMPA_PSEAE Cytosol aminopeptidase OS=Pseudomonas aeruginosa (strain ATCC 15692 / PAO1 / 1C / PRS 101 / LMG 12228) GN=pepA PE=3 SV=1	1	10	10	10	29.5	29.5	29.5	52.331	495	495	0	93.417	85727000	26				10	64;97;111;152;154;240;264;272;396;437	True;True;True;True;True;True;True;True;True;True	68;103;117;158;160;249;273;281;412;455	123;124;184;185;207;267;272;273;441;442;501;502;515;516;766;767;768;834;835	283;284;285;399;400;428;526;540;541;542;873;874;992;993;994;995;1009;1010;1011;1012;1013;1014;1015;1016;1637;1638;1639;1640;1782;1783	284;399;428;526;542;873;995;1013;1639;1783
sp|O69753|PHZB1_PSEAE	sp|O69753|PHZB1_PSEAE	4	4	1	>sp|O69753|PHZB1_PSEAE Phenazine biosynthesis protein PhzB 1 OS=Pseudomonas aeruginosa (strain ATCC 15692 / PAO1 / 1C / PRS 101 / LMG 12228) GN=phzB1 PE=3 SV=1	1	4	4	1	24.1	24.1	9.9	18.888	162	162	0	35.724	12821000	9				11	40;41;338;345	True;True;True;True	42;43;352;359	75;76;77;78;663;675	188;189;190;191;192;193;1385;1403;1404	191;192;1385;1404
sp|O69754|PHZF_PSEAE	sp|O69754|PHZF_PSEAE	4	4	4	>sp|O69754|PHZF_PSEAE Trans-2,3-dihydro-3-hydroxyanthranilate isomerase OS=Pseudomonas aeruginosa (strain ATCC 15692 / PAO1 / 1C / PRS 101 / LMG 12228) GN=phzF1 PE=3 SV=2	1	4	4	4	30.2	30.2	30.2	30.342	278	278	0	37.791	20620000	8				12	194;307;309;468	True;True;True;True	202;318;321;487	336;337;571;572;577;889	679;680;681;682;1113;1114;1133;1904	680;1114;1133;1904
sp|O82850|RS2_PSEAE	sp|O82850|RS2_PSEAE	1	1	1	>sp|O82850|RS2_PSEAE 30S ribosomal protein S2 OS=Pseudomonas aeruginosa (strain ATCC 15692 / PAO1 / 1C / PRS 101 / LMG 12228) GN=rpsB PE=3 SV=2	1	1	1	1	5.7	5.7	5.7	27.336	246	246	0	10.601	1797700	2				13	406	TRUE	422	785	1685;1686	1685
sp|O82851|EFTS_PSEAE	sp|O82851|EFTS_PSEAE	1	1	1	>sp|O82851|EFTS_PSEAE Elongation factor Ts OS=Pseudomonas aeruginosa (strain ATCC 15692 / PAO1 / 1C / PRS 101 / LMG 12228) GN=tsf PE=3 SV=1	1	1	1	1	4.8	4.8	4.8	30.653	289	289	0.0071942	5.3888	0	1				14	180	TRUE	187	316	635	635
sp|O86428|ILVE_PSEAE	sp|O86428|ILVE_PSEAE	3	3	3	>sp|O86428|ILVE_PSEAE Branched-chain-amino-acid aminotransferase OS=Pseudomonas aeruginosa (strain ATCC 15692 / PAO1 / 1C / PRS 101 / LMG 12228) GN=ilvE PE=1 SV=2	1	3	3	3	11.1	11.1	11.1	34.084	307	307	0	19.007	7284100	4				15	70;72;340	True;True;True	75;77;354	134;135;138;666	297;298;304;1391	297;304;1391
sp|P04739|FMPO_PSEAE	sp|P04739|FMPO_PSEAE	2	2	2	>sp|P04739|FMPO_PSEAE Fimbrial protein OS=Pseudomonas aeruginosa (strain ATCC 15692 / PAO1 / 1C / PRS 101 / LMG 12228) GN=pilA PE=1 SV=1	1	2	2	2	15.4	15.4	15.4	15.512	149	149	0	19.377	8400300	4				16	366;418	True;True	381;434	712;713;801	1475;1476;1477;1705	1476;1705
sp|P05384|DBHB_PSEAE	sp|P05384|DBHB_PSEAE	2	2	2	>sp|P05384|DBHB_PSEAE DNA-binding protein HU-beta OS=Pseudomonas aeruginosa (strain ATCC 15692 / PAO1 / 1C / PRS 101 / LMG 12228) GN=hupB PE=1 SV=3	1	2	2	2	32.2	32.2	32.2	9.0865	90	90	0	18.563	18042000	4				17	29;367	True;True	31;382	57;58;714	160;161;162;1478	162;1478
sp|P08308|OTCC_PSEAE	sp|P08308|OTCC_PSEAE	7	7	7	>sp|P08308|OTCC_PSEAE Ornithine carbamoyltransferase, catabolic OS=Pseudomonas aeruginosa (strain ATCC 15692 / PAO1 / 1C / PRS 101 / LMG 12228) GN=arcB PE=1 SV=3	1	7	7	7	23.2	23.2	23.2	38.108	336	336	0	55.192	61179000	24				18	113;124;204;321;331;335;498	True;True;True;True;True;True;True	119;130;213;335;345;349;517	210;211;226;227;357;358;603;604;651;658;659;961	434;435;436;461;462;463;464;465;466;467;468;469;712;713;714;1188;1189;1190;1191;1366;1375;1376;1377;2033	435;462;714;1190;1366;1375;2033
sp|P09591|EFTU_PSEAE	sp|P09591|EFTU_PSEAE	13	13	13	>sp|P09591|EFTU_PSEAE Elongation factor Tu OS=Pseudomonas aeruginosa (strain ATCC 15692 / PAO1 / 1C / PRS 101 / LMG 12228) GN=tufA PE=1 SV=2	1	13	13	13	41.6	41.6	41.6	43.369	397	397	0	149.01	453380000	123				19	15;22;77;86;153;174;293;294;319;355;415;420;462	True;True;True;True;True;True;True;True;True;True;True;True;True	15;23;24;82;91;159;181;303;304;332;333;369;431;436;480	29;30;42;43;44;45;46;146;147;161;162;268;269;270;271;305;306;550;551;552;593;594;595;596;597;598;599;600;601;693;694;795;796;803;874;875	84;85;86;87;88;89;90;91;92;93;94;95;96;123;124;125;126;127;128;129;130;131;132;133;134;135;136;137;138;139;140;141;142;143;144;145;146;147;148;322;323;347;348;349;350;351;527;528;529;530;531;532;533;534;535;536;537;538;539;615;616;617;618;619;620;621;622;623;624;1073;1074;1075;1076;1077;1078;1079;1080;1081;1162;1163;1164;1165;1166;1167;1168;1169;1170;1171;1172;1173;1174;1175;1176;1177;1178;1179;1…	84;137;322;350;538;622;1074;1081;1181;1433;1699;1707;1857	1;2;3	216;362;372
sp|P11221|OPRI_PSEAE	sp|P11221|OPRI_PSEAE	2	2	2	>sp|P11221|OPRI_PSEAE Major outer membrane lipoprotein OS=Pseudomonas aeruginosa (strain ATCC 15692 / PAO1 / 1C / PRS 101 / LMG 12228) GN=oprI PE=3 SV=1	1	2	2	2	25.3	25.3	25.3	8.8348	83	83	0	16.115	1974300	8				20	221;290	True;True	230;300	412;545;546	825;1060;1061;1062;1063;1064;1065;1066	825;1061
sp|P11436|AMIE_PSEAE	sp|P11436|AMIE_PSEAE	2	2	2	>sp|P11436|AMIE_PSEAE Aliphatic amidase OS=Pseudomonas aeruginosa (strain ATCC 15692 / PAO1 / 1C / PRS 101 / LMG 12228) GN=amiE PE=1 SV=2	1	2	2	2	7.8	7.8	7.8	38.494	346	346	0	13.568	1744400	3				21	222;287	True;True	231;297	413;540	826;827;1048	826;1048
sp|P13794|PORF_PSEAE	sp|P13794|PORF_PSEAE	5	5	5	>sp|P13794|PORF_PSEAE Outer membrane porin F OS=Pseudomonas aeruginosa (strain ATCC 15692 / PAO1 / 1C / PRS 101 / LMG 12228) GN=oprF PE=1 SV=1	1	5	5	5	19.7	19.7	19.7	37.639	350	350	0	51.765	48176000	27				22	91;356;358;429;454	True;True;True;True;True	97;370;372;445;472	171;172;695;697;817;818;859;860	367;368;369;370;371;372;373;374;375;376;1436;1437;1439;1753;1754;1755;1756;1757;1814;1815;1816;1817;1818;1819;1820;1821;1822	374;1436;1439;1753;1814
sp|P13981|ARCA_PSEAE	sp|P13981|ARCA_PSEAE	18	18	18	>sp|P13981|ARCA_PSEAE Arginine deiminase OS=Pseudomonas aeruginosa (strain ATCC 15692 / PAO1 / 1C / PRS 101 / LMG 12228) GN=arcA PE=1 SV=2	1	18	18	18	51.7	51.7	51.7	46.435	418	418	0	175.34	222490000	83				23	18;82;88;108;118;121;151;216;223;224;341;346;349;391;400;401;444;477	True;True;True;True;True;True;True;True;True;True;True;True;True;True;True;True;True;True	19;87;93;114;124;127;157;225;232;233;355;360;363;407;416;417;462;496	36;154;155;164;165;201;202;217;221;222;265;266;405;406;414;415;416;667;668;676;677;685;754;755;772;773;774;775;776;777;778;844;902;903	116;334;335;336;337;338;353;354;355;356;418;419;420;421;445;446;447;453;454;455;456;457;524;525;816;817;828;829;830;831;1392;1393;1394;1395;1405;1406;1407;1408;1423;1424;1594;1595;1596;1597;1646;1647;1648;1649;1650;1651;1652;1653;1654;1655;1656;1657;1658;1659;1660;1661;1662;1663;1664;1665;1666;1667;1668;1669;1670;1671;1672;1673;1674;1675;1676;1794;1795;1920;1921;1922;1923;1924;1925	116;338;353;418;446;453;524;816;828;829;1395;1405;1424;1595;1647;1668;1795;1922
sp|P13982|ARCC_PSEAE	sp|P13982|ARCC_PSEAE	2	2	2	>sp|P13982|ARCC_PSEAE Carbamate kinase OS=Pseudomonas aeruginosa (strain ATCC 15692 / PAO1 / 1C / PRS 101 / LMG 12228) GN=arcC PE=3 SV=1	1	2	2	2	9.4	9.4	9.4	33.08	310	310	0	19.886	4408500	5				24	20;75	True;True	21;80	38;39;142;143	118;119;120;308;309	118;308
sp|P15276|ALGP_PSEAE	sp|P15276|ALGP_PSEAE	1	1	1	>sp|P15276|ALGP_PSEAE Transcriptional regulatory protein AlgP OS=Pseudomonas aeruginosa (strain ATCC 15692 / PAO1 / 1C / PRS 101 / LMG 12228) GN=algP PE=4 SV=2	1	1	1	1	4	4	4	34.49	352	352	0	13.423	6907900	4				25	119	TRUE	125	218;219	448;449;450;451	450
sp|P28810|MMSA_PSEAE;tr|Q9I5I2|Q9I5I2_PSEAE	sp|P28810|MMSA_PSEAE;tr|Q9I5I2|Q9I5I2_PSEAE	1;1	1;1	1;1	>sp|P28810|MMSA_PSEAE Methylmalonate-semialdehyde dehydrogenase [acylating] OS=Pseudomonas aeruginosa (strain ATCC 15692 / PAO1 / 1C / PRS 101 / LMG 12228) GN=mmsA PE=1 SV=2;>tr|Q9I5I2|Q9I5I2_PSEAE Probable aldehyde dehydrogenase OS=Pseudomonas aeruginosa	2	1	1	1	2.4	2.4	2.4	53.663	497	497;502	0	6.0238	0	1				26	232	TRUE	241	430	860	860
sp|P30718|CH60_PSEAE	sp|P30718|CH60_PSEAE	20	20	20	>sp|P30718|CH60_PSEAE 60 kDa chaperonin OS=Pseudomonas aeruginosa (strain ATCC 15692 / PAO1 / 1C / PRS 101 / LMG 12228) GN=groL PE=1 SV=3	1	20	20	20	50.6	50.6	50.6	57.085	547	547	0	224.57	347860000	113				27	2;17;37;38;45;47;62;63;83;115;116;126;140;173;234;313;350;351;368;432	True;True;True;True;True;True;True;True;True;True;True;True;True;True;True;True;True;True;True;True	2;17;18;39;40;48;49;51;66;67;88;121;122;132;146;180;243;325;326;364;365;383;448;449	4;5;32;33;34;35;70;71;72;87;88;89;90;91;93;94;95;96;120;121;122;156;157;158;213;214;215;229;230;248;249;303;304;433;583;584;585;586;686;687;688;715;824;825;826	24;25;26;27;28;29;30;31;32;33;98;99;100;101;102;103;104;105;106;107;108;109;110;111;112;113;114;115;180;181;182;183;184;185;209;210;211;212;213;214;215;216;217;218;219;220;221;222;223;224;225;227;228;229;230;231;232;233;234;235;236;237;238;239;240;241;279;280;281;282;339;340;341;342;343;438;439;440;441;442;471;472;499;500;501;609;610;611;612;613;614;863;1143;1144;1145;1146;1147;1148;1149;1150;115…	32;105;183;184;210;232;279;282;340;438;441;471;501;613;863;1146;1425;1426;1479;1763	4;5;6;7;8	16;114;267;288;389
sp|P37798|ACCC_PSEAE	sp|P37798|ACCC_PSEAE	2	2	2	>sp|P37798|ACCC_PSEAE Biotin carboxylase OS=Pseudomonas aeruginosa (strain ATCC 15692 / PAO1 / 1C / PRS 101 / LMG 12228) GN=accC PE=1 SV=1	1	2	2	2	6	6	6	48.887	449	449	0	11.393	2080900	3				28	440;443	True;True	458;461	838;839;843	1786;1787;1793	1787;1793
sp|P37799|BCCP_PSEAE	sp|P37799|BCCP_PSEAE	8	8	8	>sp|P37799|BCCP_PSEAE Biotin carboxyl carrier protein of acetyl-CoA carboxylase OS=Pseudomonas aeruginosa (strain ATCC 15692 / PAO1 / 1C / PRS 101 / LMG 12228) GN=accB PE=3 SV=1	1	8	8	8	62.2	62.2	62.2	16.455	156	156	0	129.75	994900000	146				29	1;226;227;262;263;277;382;393	True;True;True;True;True;True;True;True	1;235;236;271;272;287;397;398;409	1;2;3;419;420;421;422;423;424;476;477;478;479;480;481;482;483;484;485;486;487;488;489;490;491;492;493;494;495;496;497;498;499;500;527;734;735;736;737;758;759;760;761;762	1;2;3;4;5;6;7;8;9;10;11;12;13;14;15;16;17;18;19;20;21;22;23;834;835;836;837;838;839;840;841;842;843;844;845;846;847;949;950;951;952;953;954;955;956;957;958;959;960;961;962;963;964;965;966;967;968;969;970;971;972;973;974;975;976;977;978;979;980;981;982;983;984;985;986;987;988;989;990;991;1031;1504;1505;1506;1507;1508;1509;1510;1511;1512;1513;1514;1515;1516;1517;1518;1519;1520;1521;1522;1523;1524;1…	5;838;845;970;981;1031;1521;1617	9	87
sp|P38100|CARB_PSEAE	sp|P38100|CARB_PSEAE	1	1	1	>sp|P38100|CARB_PSEAE Carbamoyl-phosphate synthase large chain OS=Pseudomonas aeruginosa (strain ATCC 15692 / PAO1 / 1C / PRS 101 / LMG 12228) GN=carB PE=3 SV=3	1	1	1	1	1.4	1.4	1.4	117.33	1073	1073	0	10.268	979420	1				30	409	TRUE	425	788	1691	1691
sp|P40947|SSB_PSEAE	sp|P40947|SSB_PSEAE	1	1	1	>sp|P40947|SSB_PSEAE Single-stranded DNA-binding protein OS=Pseudomonas aeruginosa (strain ATCC 15692 / PAO1 / 1C / PRS 101 / LMG 12228) GN=ssb PE=1 SV=3	1	1	1	1	8.5	8.5	8.5	18.557	165	165	0	7.7246	805620	1				31	441	TRUE	459	840	1788	1788
sp|P43336|PHHC_PSEAE	sp|P43336|PHHC_PSEAE	4	4	4	>sp|P43336|PHHC_PSEAE Aromatic-amino-acid aminotransferase OS=Pseudomonas aeruginosa (strain ATCC 15692 / PAO1 / 1C / PRS 101 / LMG 12228) GN=phhC PE=3 SV=2	1	4	4	4	15	15	15	43.273	399	399	0	36.788	16503000	11				32	4;196;231;460	True;True;True;True	4;204;240;478	8;9;339;340;429;870;871	40;41;684;685;686;859;1842;1843;1844;1845;1846	40;685;859;1846
sp|P47204|FTSZ_PSEAE	sp|P47204|FTSZ_PSEAE	1	1	1	>sp|P47204|FTSZ_PSEAE Cell division protein FtsZ OS=Pseudomonas aeruginosa (strain ATCC 15692 / PAO1 / 1C / PRS 101 / LMG 12228) GN=ftsZ PE=1 SV=2	1	1	1	1	4.8	4.8	4.8	41.218	394	394	0	14.183	658190	3				33	474	TRUE	493	897;898	1913;1914;1915	1913
sp|P53593|SUCC_PSEAE	sp|P53593|SUCC_PSEAE	9	9	9	>sp|P53593|SUCC_PSEAE Succinyl-CoA ligase [ADP-forming] subunit beta OS=Pseudomonas aeruginosa (strain ATCC 15692 / PAO1 / 1C / PRS 101 / LMG 12228) GN=sucC PE=3 SV=2	1	9	9	9	29.9	29.9	29.9	41.542	388	388	0	119.41	74001000	31				34	10;59;213;244;248;249;333;353;446	True;True;True;True;True;True;True;True;True	10;63;222;253;257;258;347;367;464	21;22;114;115;371;372;447;454;455;456;654;655;690;691;846;847;848;849	73;74;75;76;268;269;270;271;272;273;734;735;736;737;879;888;889;890;891;892;1369;1370;1371;1429;1430;1797;1798;1799;1800;1801;1802;1803	73;269;734;879;888;891;1370;1430;1802
sp|P53641|SODF_PSEAE	sp|P53641|SODF_PSEAE	3	3	3	>sp|P53641|SODF_PSEAE Superoxide dismutase [Fe] OS=Pseudomonas aeruginosa (strain ATCC 15692 / PAO1 / 1C / PRS 101 / LMG 12228) GN=sodB PE=3 SV=3	1	3	3	3	21.8	21.8	21.8	21.351	193	193	0	31.806	20578000	7				35	12;414;501	True;True;True	12;430;520	24;25;793;794;966	78;79;1697;1698;2039;2040;2041	78;1698;2040
sp|P57668|TPX_PSEAE	sp|P57668|TPX_PSEAE	1	1	1	>sp|P57668|TPX_PSEAE Probable thiol peroxidase OS=Pseudomonas aeruginosa (strain ATCC 15692 / PAO1 / 1C / PRS 101 / LMG 12228) GN=tpx PE=3 SV=1	1	1	1	1	7.9	7.9	7.9	17.234	165	165	0	5.855	0	1				36	160	TRUE	166	281	551	551
sp|P72173|AAT_PSEAE	sp|P72173|AAT_PSEAE	1	1	1	>sp|P72173|AAT_PSEAE Aspartate aminotransferase OS=Pseudomonas aeruginosa (strain ATCC 15692 / PAO1 / 1C / PRS 101 / LMG 12228) GN=aspC PE=3 SV=2	1	1	1	1	3.5	3.5	3.5	43.319	398	398	0	10.431	1056800	2				37	478	TRUE	497	904;905	1926;1927	1927
sp|Q51342|PUR1_PSEAE	sp|Q51342|PUR1_PSEAE	1	1	1	>sp|Q51342|PUR1_PSEAE Amidophosphoribosyltransferase OS=Pseudomonas aeruginosa (strain ATCC 15692 / PAO1 / 1C / PRS 101 / LMG 12228) GN=purF PE=3 SV=3	1	1	1	1	3.4	3.4	3.4	55.369	501	501	0	6.1086	965190	2				38	381	TRUE	396	733	1502;1503	1503
sp|Q51561|RPOB_PSEAE	sp|Q51561|RPOB_PSEAE	4	4	4	>sp|Q51561|RPOB_PSEAE DNA-directed RNA polymerase subunit beta OS=Pseudomonas aeruginosa (strain ATCC 15692 / PAO1 / 1C / PRS 101 / LMG 12228) GN=rpoB PE=3 SV=2	1	4	4	4	4.9	4.9	4.9	150.84	1357	1357	0	30.341	11370000	8				39	19;33;50;314	True;True;True;True	20;35;54;327	37;62;63;100;587	117;167;168;169;170;171;247;1155	117;167;247;1155
sp|Q51567|SUCD_PSEAE	sp|Q51567|SUCD_PSEAE	4	4	4	>sp|Q51567|SUCD_PSEAE Succinyl-CoA ligase [ADP-forming] subunit alpha OS=Pseudomonas aeruginosa (strain ATCC 15692 / PAO1 / 1C / PRS 101 / LMG 12228) GN=sucD PE=3 SV=2	1	4	4	4	20.7	20.7	20.7	30.266	295	295	0	29.272	11664000	6				40	27;122;250;372	True;True;True;True	29;128;259;387	54;55;223;224;457;720	157;158;458;459;893;1485	158;459;893;1485
sp|Q59636|NDK_PSEAE	sp|Q59636|NDK_PSEAE	1	1	1	>sp|Q59636|NDK_PSEAE Nucleoside diphosphate kinase OS=Pseudomonas aeruginosa (strain ATCC 15692 / PAO1 / 1C / PRS 101 / LMG 12228) GN=ndk PE=3 SV=2	1	1	1	1	6.3	6.3	6.3	15.592	143	143	0	6.4234	4561200	2				41	343	TRUE	357	671;672	1399;1400	1399
sp|Q59637|ODP1_PSEAE	sp|Q59637|ODP1_PSEAE	9	9	9	>sp|Q59637|ODP1_PSEAE Pyruvate dehydrogenase E1 component OS=Pseudomonas aeruginosa (strain ATCC 15692 / PAO1 / 1C / PRS 101 / LMG 12228) GN=aceE PE=3 SV=2	1	9	9	9	11.5	11.5	11.5	99.563	882	882	0	59.207	23243000	14				42	79;107;137;201;215;284;373;380;450	True;True;True;True;True;True;True;True;True	84;113;143;209;224;294;388;395;468	149;199;200;245;348;349;403;404;537;721;722;732;854	326;416;417;495;696;697;814;815;1045;1486;1487;1488;1489;1501;1809	326;417;495;697;815;1045;1489;1501;1809
sp|Q9HT16|ATPF_PSEAE	sp|Q9HT16|ATPF_PSEAE	1	1	1	>sp|Q9HT16|ATPF_PSEAE ATP synthase subunit b OS=Pseudomonas aeruginosa (strain ATCC 15692 / PAO1 / 1C / PRS 101 / LMG 12228) GN=atpF PE=3 SV=1	1	1	1	1	7.1	7.1	7.1	16.956	156	156	0	6.0302	477280	1				43	54	TRUE	58	106	256	256
sp|Q9HT18|ATPA_PSEAE	sp|Q9HT18|ATPA_PSEAE	10	10	10	>sp|Q9HT18|ATPA_PSEAE ATP synthase subunit alpha OS=Pseudomonas aeruginosa (strain ATCC 15692 / PAO1 / 1C / PRS 101 / LMG 12228) GN=atpA PE=3 SV=1	1	10	10	10	22.4	22.4	22.4	55.393	514	514	0	87.909	74630000	26				44	100;145;206;327;388;389;394;438;472;473	True;True;True;True;True;True;True;True;True;True	106;151;215;341;404;405;410;456;491;492	189;190;256;257;360;361;643;644;748;749;750;751;752;763;764;836;894;895;896	404;405;512;513;514;716;717;1356;1357;1358;1584;1585;1586;1587;1588;1589;1590;1591;1592;1634;1635;1784;1909;1910;1911;1912	405;513;716;1357;1584;1589;1635;1784;1909;1911
sp|Q9HT20|ATPB_PSEAE	sp|Q9HT20|ATPB_PSEAE	6	6	6	>sp|Q9HT20|ATPB_PSEAE ATP synthase subunit beta OS=Pseudomonas aeruginosa (strain ATCC 15692 / PAO1 / 1C / PRS 101 / LMG 12228) GN=atpD PE=3 SV=1	1	6	6	6	16.6	16.6	16.6	49.499	458	458	0	45.521	9181900	8				45	90;352;374;425;426;435	True;True;True;True;True;True	96;366;389;441;442;453	170;689;723;810;811;812;831	366;1428;1490;1718;1719;1720;1721;1779	366;1428;1490;1718;1721;1779
sp|Q9HTD7|ASPA_PSEAE	sp|Q9HTD7|ASPA_PSEAE	3	3	3	>sp|Q9HTD7|ASPA_PSEAE Aspartate ammonia-lyase OS=Pseudomonas aeruginosa (strain ATCC 15692 / PAO1 / 1C / PRS 101 / LMG 12228) GN=aspA PE=3 SV=1	1	3	3	3	13.5	13.5	13.5	51.069	474	474	0	23.626	4907600	10				46	84;259;268	True;True;True	89;268;277	159;472;473;508;509	344;940;941;942;943;944;945;946;1002;1003	344;940;1003
sp|Q9HU21|RMLC_PSEAE	sp|Q9HU21|RMLC_PSEAE	1	1	1	>sp|Q9HU21|RMLC_PSEAE dTDP-4-dehydrorhamnose 3,5-epimerase OS=Pseudomonas aeruginosa (strain ATCC 15692 / PAO1 / 1C / PRS 101 / LMG 12228) GN=rmlC PE=1 SV=1	1	1	1	1	6.6	6.6	6.6	20.766	181	181	0	5.9984	0	1				47	236	TRUE	245	435	866	866
sp|Q9HU65|GLNA_PSEAE	sp|Q9HU65|GLNA_PSEAE	2	2	2	>sp|Q9HU65|GLNA_PSEAE Glutamine synthetase OS=Pseudomonas aeruginosa (strain ATCC 15692 / PAO1 / 1C / PRS 101 / LMG 12228) GN=glnA PE=1 SV=1	1	2	2	2	8.5	8.5	8.5	51.944	469	469	0	27.197	5204600	7				48	298;339	True;True	308;353	556;664;665	1085;1086;1386;1387;1388;1389;1390	1086;1386
sp|Q9HU83|HUTU_PSEAE	sp|Q9HU83|HUTU_PSEAE	1	1	1	>sp|Q9HU83|HUTU_PSEAE Urocanate hydratase OS=Pseudomonas aeruginosa (strain ATCC 15692 / PAO1 / 1C / PRS 101 / LMG 12228) GN=hutU PE=1 SV=1	1	1	1	1	2.1	2.1	2.1	61.193	559	559	0	8.6983	492090	1				49	453	TRUE	471	858	1813	1813
sp|Q9HUM6|PURA_PSEAE	sp|Q9HUM6|PURA_PSEAE	1	1	1	>sp|Q9HUM6|PURA_PSEAE Adenylosuccinate synthetase OS=Pseudomonas aeruginosa (strain ATCC 15692 / PAO1 / 1C / PRS 101 / LMG 12228) GN=purA PE=3 SV=1	1	1	1	1	2.3	2.3	2.3	46.814	430	430	0	5.8177	651870	1				50	405	TRUE	421	784	1684	1684
sp|Q9HV43|DNAK_PSEAE	sp|Q9HV43|DNAK_PSEAE	1	1	1	>sp|Q9HV43|DNAK_PSEAE Chaperone protein DnaK OS=Pseudomonas aeruginosa (strain ATCC 15692 / PAO1 / 1C / PRS 101 / LMG 12228) GN=dnaK PE=3 SV=1	1	1	1	1	3.5	3.5	3.5	68.402	637	637	0	6.5955	6280300	2				51	417	TRUE	433	799;800	1703;1704	1704
sp|Q9HV59|PNP_PSEAE	sp|Q9HV59|PNP_PSEAE	1	1	1	>sp|Q9HV59|PNP_PSEAE Polyribonucleotide nucleotidyltransferase OS=Pseudomonas aeruginosa (strain ATCC 15692 / PAO1 / 1C / PRS 101 / LMG 12228) GN=pnp PE=3 SV=1	1	1	1	1	1.9	1.9	1.9	75.452	701	701	0.0079365	5.5302	1039000	1				52	49	TRUE	53	99	246	246
sp|Q9HV69|PANC_PSEAE	sp|Q9HV69|PANC_PSEAE	1	1	1	>sp|Q9HV69|PANC_PSEAE Pantothenate synthetase OS=Pseudomonas aeruginosa (strain ATCC 15692 / PAO1 / 1C / PRS 101 / LMG 12228) GN=panC PE=3 SV=1	1	1	1	1	5.7	5.7	5.7	30.836	283	283	0.0073529	5.4266	0	3				53	348	TRUE	362	682;683;684	1420;1421;1422	1420
sp|Q9HVA2|ILVC_PSEAE	sp|Q9HVA2|ILVC_PSEAE	1	1	1	>sp|Q9HVA2|ILVC_PSEAE Ketol-acid reductoisomerase OS=Pseudomonas aeruginosa (strain ATCC 15692 / PAO1 / 1C / PRS 101 / LMG 12228) GN=ilvC PE=1 SV=1	1	1	1	1	5.6	5.6	5.6	36.424	338	338	0	10.93	3657100	3				54	149	TRUE	155	261;262	518;519;520	520
sp|Q9HVY3|RS9_PSEAE	sp|Q9HVY3|RS9_PSEAE	1	1	1	>sp|Q9HVY3|RS9_PSEAE 30S ribosomal protein S9 OS=Pseudomonas aeruginosa (strain ATCC 15692 / PAO1 / 1C / PRS 101 / LMG 12228) GN=rpsI PE=3 SV=1	1	1	1	1	7.7	7.7	7.7	14.615	130	130	0	6.3113	3060300	2				55	34	TRUE	36	64;65	172;173	173
sp|Q9HWC8|RL7_PSEAE	sp|Q9HWC8|RL7_PSEAE	1	1	1	>sp|Q9HWC8|RL7_PSEAE 50S ribosomal protein L7/L12 OS=Pseudomonas aeruginosa (strain ATCC 15692 / PAO1 / 1C / PRS 101 / LMG 12228) GN=rplL PE=3 SV=1	1	1	1	1	9	9	9	12.479	122	122	0	5.9739	1507100	2				56	68	TRUE	73	131;132	294;295	295
sp|Q9HWC9|RPOC_PSEAE	sp|Q9HWC9|RPOC_PSEAE	6	6	6	>sp|Q9HWC9|RPOC_PSEAE DNA-directed RNA polymerase subunit beta OS=Pseudomonas aeruginosa (strain ATCC 15692 / PAO1 / 1C / PRS 101 / LMG 12228) GN=rpoC PE=3 SV=1	1	6	6	6	6.2	6.2	6.2	154.38	1399	1399	0	40.767	9455800	10				57	85;105;200;258;423;496	True;True;True;True;True;True	90;111;208;267;439;515	160;195;196;346;347;471;807;957	345;346;410;411;412;694;695;939;1712;2028	345;411;694;939;1712;2028
sp|Q9HWD1|RS7_PSEAE	sp|Q9HWD1|RS7_PSEAE	2	2	2	>sp|Q9HWD1|RS7_PSEAE 30S ribosomal protein S7 OS=Pseudomonas aeruginosa (strain ATCC 15692 / PAO1 / 1C / PRS 101 / LMG 12228) GN=rpsG PE=3 SV=1	1	2	2	2	15.4	15.4	15.4	17.504	156	156	0	13.636	3810900	3				58	28;233	True;True	30;242	56;431;432	159;861;862	159;862
sp|Q9HWD2|EFG1_PSEAE;sp|Q9I244|EFG2_PSEAE	sp|Q9HWD2|EFG1_PSEAE	12;5	12;5	12;5	>sp|Q9HWD2|EFG1_PSEAE Elongation factor G 1 OS=Pseudomonas aeruginosa (strain ATCC 15692 / PAO1 / 1C / PRS 101 / LMG 12228) GN=fusA PE=1 SV=1	2	12	12	12	24.6	24.6	24.6	77.784	706	706;702	0	121.18	57230000	23				59	9;14;102;156;169;170;183;239;305;330;482;486	True;True;True;True;True;True;True;True;True;True;True;True	9;14;108;162;176;177;190;248;316;344;501;505	19;20;28;192;275;298;299;319;439;440;568;569;649;650;911;912;917;918	68;69;70;71;72;83;407;544;602;603;639;871;872;1108;1109;1110;1111;1364;1365;1934;1935;1940;1941;1942	68;83;407;544;602;603;639;872;1110;1365;1935;1941
sp|Q9HWD5|RL3_PSEAE	sp|Q9HWD5|RL3_PSEAE	1	1	1	>sp|Q9HWD5|RL3_PSEAE 50S ribosomal protein L3 OS=Pseudomonas aeruginosa (strain ATCC 15692 / PAO1 / 1C / PRS 101 / LMG 12228) GN=rplC PE=3 SV=1	1	1	1	1	4.7	4.7	4.7	22.591	211	211	0	6.7822	2019400	1				60	471	TRUE	490	893	1908	1908
sp|Q9HWD8|RL2_PSEAE	sp|Q9HWD8|RL2_PSEAE	2	2	2	>sp|Q9HWD8|RL2_PSEAE 50S ribosomal protein L2 OS=Pseudomonas aeruginosa (strain ATCC 15692 / PAO1 / 1C / PRS 101 / LMG 12228) GN=rplB PE=3 SV=1	1	2	2	2	11.4	11.4	11.4	29.579	273	273	0	18.85	8637300	6				61	60;168	True;True	64;175	116;117;296;297	274;275;276;599;600;601	276;600
sp|Q9HWE1|RS3_PSEAE	sp|Q9HWE1|RS3_PSEAE	1	1	1	>sp|Q9HWE1|RS3_PSEAE 30S ribosomal protein S3 OS=Pseudomonas aeruginosa (strain ATCC 15692 / PAO1 / 1C / PRS 101 / LMG 12228) GN=rpsC PE=3 SV=1	1	1	1	1	8.3	8.3	8.3	25.838	228	228	0	5.8836	0	1				62	228	TRUE	237	425	848	848
sp|Q9HWE5|RL14_PSEAE	sp|Q9HWE5|RL14_PSEAE	1	1	1	>sp|Q9HWE5|RL14_PSEAE 50S ribosomal protein L14 OS=Pseudomonas aeruginosa (strain ATCC 15692 / PAO1 / 1C / PRS 101 / LMG 12228) GN=rplN PE=3 SV=1	1	1	1	1	7.4	7.4	7.4	13.412	122	122	0.0074074	5.4363	1034800	1				63	487	TRUE	506	919	1943	1943
sp|Q9HWE8|RS14_PSEAE	sp|Q9HWE8|RS14_PSEAE	1	1	1	>sp|Q9HWE8|RS14_PSEAE 30S ribosomal protein S14 OS=Pseudomonas aeruginosa (strain ATCC 15692 / PAO1 / 1C / PRS 101 / LMG 12228) GN=rpsN PE=3 SV=1	1	1	1	1	12.9	12.9	12.9	11.565	101	101	0	7.6164	1162200	3				64	23	TRUE	25	47;48	149;150;151	149
sp|Q9HWF2|RS5_PSEAE	sp|Q9HWF2|RS5_PSEAE	2	2	2	>sp|Q9HWF2|RS5_PSEAE 30S ribosomal protein S5 OS=Pseudomonas aeruginosa (strain ATCC 15692 / PAO1 / 1C / PRS 101 / LMG 12228) GN=rpsE PE=3 SV=1	1	2	2	2	19.9	19.9	19.9	17.625	166	166	0	22.414	2034100	3				65	66;481	True;True	70;500	127;910	288;1932;1933	288;1933
sp|Q9HXZ4|PYRG_PSEAE	sp|Q9HXZ4|PYRG_PSEAE	1	1	1	>sp|Q9HXZ4|PYRG_PSEAE CTP synthase OS=Pseudomonas aeruginosa (strain ATCC 15692 / PAO1 / 1C / PRS 101 / LMG 12228) GN=pyrG PE=3 SV=1	1	1	1	1	2.4	2.4	2.4	59.617	542	542	0	9.7443	224770	2				66	416	TRUE	432	797;798	1701;1702	1701
sp|Q9HYR9|CLPP2_PSEAE	sp|Q9HYR9|CLPP2_PSEAE	1	1	1	>sp|Q9HYR9|CLPP2_PSEAE ATP-dependent Clp protease proteolytic subunit 2 OS=Pseudomonas aeruginosa (strain ATCC 15692 / PAO1 / 1C / PRS 101 / LMG 12228) GN=clpP2 PE=3 SV=1	1	1	1	1	6	6	6	22.142	201	201	0	9.2891	307990	1				67	192	TRUE	199	331	666	666
sp|Q9HZ71|RS1_PSEAE	sp|Q9HZ71|RS1_PSEAE	4	4	4	>sp|Q9HZ71|RS1_PSEAE 30S ribosomal protein S1 OS=Pseudomonas aeruginosa (strain ATCC 15692 / PAO1 / 1C / PRS 101 / LMG 12228) GN=rpsA PE=3 SV=1	1	4	4	4	9.7	9.7	9.7	61.869	559	559	0	36.901	13186000	8				68	13;96;138;148	True;True;True;True	13;102;144;154	26;27;182;183;246;260	80;81;82;397;398;496;497;517	80;398;497;517
sp|Q9HZE0|DHE2_PSEAE	sp|Q9HZE0|DHE2_PSEAE	17	17	17	>sp|Q9HZE0|DHE2_PSEAE NAD-specific glutamate dehydrogenase OS=Pseudomonas aeruginosa (strain ATCC 15692 / PAO1 / 1C / PRS 101 / LMG 12228) GN=gdhB PE=1 SV=1	1	17	17	17	15.1	15.1	15.1	182.64	1620	1620	0	145.55	49524000	39				69	5;24;53;76;109;209;238;255;276;301;316;379;407;436;439;449;500	True;True;True;True;True;True;True;True;True;True;True;True;True;True;True;True;True	5;26;57;81;115;218;247;264;286;311;329;394;423;454;457;467;519	10;49;104;105;144;145;203;204;365;438;465;466;525;526;560;589;731;786;832;833;837;853;964;965	42;152;253;254;255;310;311;312;313;314;315;316;317;318;319;320;321;422;423;723;724;869;870;926;927;928;1029;1030;1091;1157;1158;1500;1687;1780;1781;1785;1808;2037;2038	42;152;254;318;423;724;870;928;1030;1091;1157;1500;1687;1780;1785;1808;2038
sp|Q9HZJ2|FADB_PSEAE	sp|Q9HZJ2|FADB_PSEAE	2	2	2	>sp|Q9HZJ2|FADB_PSEAE Fatty acid oxidation complex subunit alpha OS=Pseudomonas aeruginosa (strain ATCC 15692 / PAO1 / 1C / PRS 101 / LMG 12228) GN=fadB PE=3 SV=1	1	2	2	2	5.2	5.2	5.2	76.953	715	715	0	20.996	1177900	2				70	146;413	True;True	152;429	258;792	515;1696	515;1696
sp|Q9HZP6|ETFB_PSEAE	sp|Q9HZP6|ETFB_PSEAE	2	2	2	>sp|Q9HZP6|ETFB_PSEAE Electron transfer flavoprotein subunit beta OS=Pseudomonas aeruginosa (strain ATCC 15692 / PAO1 / 1C / PRS 101 / LMG 12228) GN=etfB PE=3 SV=1	1	2	2	2	11.6	11.6	11.6	26.376	249	249	0	12.148	867990	4				71	25;431	True;True	27;447	50;51;822;823	153;154;1761;1762	153;1762
sp|Q9I0K4|ACEA_PSEAE	sp|Q9I0K4|ACEA_PSEAE	9	9	9	>sp|Q9I0K4|ACEA_PSEAE Isocitrate lyase OS=Pseudomonas aeruginosa (strain ATCC 15692 / PAO1 / 1C / PRS 101 / LMG 12228) GN=PA2634 PE=1 SV=1	1	9	9	9	22	22	22	58.886	531	531	0	106.62	36222000	22				72	110;172;242;274;299;329;354;397;470	True;True;True;True;True;True;True;True;True	116;179;251;284;309;343;368;413;489	205;206;302;444;521;522;557;558;647;648;692;769;891;892	424;425;426;427;608;876;1023;1024;1025;1026;1087;1088;1089;1361;1362;1363;1431;1641;1642;1643;1906;1907	424;608;876;1023;1088;1363;1431;1641;1906
sp|Q9I1L9|DLDH1_PSEAE	sp|Q9I1L9|DLDH1_PSEAE	1	1	1	>sp|Q9I1L9|DLDH1_PSEAE Dihydrolipoyl dehydrogenase OS=Pseudomonas aeruginosa (strain ATCC 15692 / PAO1 / 1C / PRS 101 / LMG 12228) GN=lpdV PE=1 SV=1	1	1	1	1	2.6	2.6	2.6	48.588	464	464	0	6.7027	1066300	1				73	46	TRUE	50	92	226	226
sp|Q9I1M0|ODB2_PSEAE	sp|Q9I1M0|ODB2_PSEAE	1	1	1	>sp|Q9I1M0|ODB2_PSEAE Lipoamide acyltransferase component of branched-chain alpha-keto acid dehydrogenase complex OS=Pseudomonas aeruginosa (strain ATCC 15692 / PAO1 / 1C / PRS 101 / LMG 12228) GN=bkdB PE=1 SV=1	1	1	1	1	2.3	2.3	2.3	45.774	428	428	0	6.8338	242070	1				74	489	TRUE	508	921	1945	1945
sp|Q9I2A8|ATOB_PSEAE	sp|Q9I2A8|ATOB_PSEAE	1	1	1	>sp|Q9I2A8|ATOB_PSEAE Acetyl-CoA acetyltransferase OS=Pseudomonas aeruginosa (strain ATCC 15692 / PAO1 / 1C / PRS 101 / LMG 12228) GN=atoB PE=3 SV=1	1	1	1	1	3.6	3.6	3.6	40.405	393	393	0	5.5447	1349000	1				75	16	TRUE	16	31	97	97
sp|Q9I2U1|CLPP1_PSEAE	sp|Q9I2U1|CLPP1_PSEAE	1	1	1	>sp|Q9I2U1|CLPP1_PSEAE ATP-dependent Clp protease proteolytic subunit 1 OS=Pseudomonas aeruginosa (strain ATCC 15692 / PAO1 / 1C / PRS 101 / LMG 12228) GN=clpP1 PE=3 SV=1	1	1	1	1	3.3	3.3	3.3	23.502	213	213	0.0077519	5.5016	0	1				76	69	TRUE	74	133	296	296
sp|Q9I2V5|ACNB_PSEAE	sp|Q9I2V5|ACNB_PSEAE	8	8	8	>sp|Q9I2V5|ACNB_PSEAE Aconitate hydratase B OS=Pseudomonas aeruginosa (strain ATCC 15692 / PAO1 / 1C / PRS 101 / LMG 12228) GN=acnB PE=3 SV=1	1	8	8	8	12.4	12.4	12.4	93.627	869	869	0	66.915	21286000	18				77	8;81;87;283;317;390;411;464	True;True;True;True;True;True;True;True	8;86;92;293;330;406;427;482	17;18;152;153;163;535;536;590;591;753;790;878;879	66;67;329;330;331;332;333;352;1042;1043;1044;1159;1160;1593;1693;1868;1869;1870	67;332;352;1042;1159;1593;1693;1868
sp|Q9I2W7|RRAAH_PSEAE	sp|Q9I2W7|RRAAH_PSEAE	1	1	1	>sp|Q9I2W7|RRAAH_PSEAE Putative 4-hydroxy-4-methyl-2-oxoglutarate aldolase OS=Pseudomonas aeruginosa (strain ATCC 15692 / PAO1 / 1C / PRS 101 / LMG 12228) GN=PA1772 PE=1 SV=1	1	1	1	1	6.2	6.2	6.2	17.404	162	162	0	5.7839	3051800	2				78	35	TRUE	37	66;67	174;175	174
sp|Q9I3C5|HTPG_PSEAE	sp|Q9I3C5|HTPG_PSEAE	1	1	1	>sp|Q9I3C5|HTPG_PSEAE Chaperone protein HtpG OS=Pseudomonas aeruginosa (strain ATCC 15692 / PAO1 / 1C / PRS 101 / LMG 12228) GN=htpG PE=3 SV=1	1	1	1	1	1.6	1.6	1.6	71.667	634	634	0	5.8249	407270	0				79	448	TRUE	466	852	1807	1807
sp|Q9I3D1|DLDH2_PSEAE	sp|Q9I3D1|DLDH2_PSEAE	8	8	8	>sp|Q9I3D1|DLDH2_PSEAE Dihydrolipoyl dehydrogenase OS=Pseudomonas aeruginosa (strain ATCC 15692 / PAO1 / 1C / PRS 101 / LMG 12228) GN=lpdG PE=3 SV=1	1	8	8	8	26.6	26.6	26.6	50.164	478	478	0	84.29	42260000	19				80	7;42;56;58;171;332;357;384	True;True;True;True;True;True;True;True	7;44;60;62;178;346;371;400	15;16;79;80;109;110;112;113;300;301;652;653;696;740	64;65;194;195;196;260;261;262;263;264;266;267;604;605;606;607;1367;1368;1438;1543	65;195;261;266;604;1368;1438;1543
sp|Q9I3D2|ODO2_PSEAE	sp|Q9I3D2|ODO2_PSEAE	1	1	1	>sp|Q9I3D2|ODO2_PSEAE Dihydrolipoyllysine-residue succinyltransferase component of 2-oxoglutarate dehydrogenase complex OS=Pseudomonas aeruginosa (strain ATCC 15692 / PAO1 / 1C / PRS 101 / LMG 12228) GN=sucB PE=3 SV=1	1	1	1	1	6.4	6.4	6.4	42.887	409	409	0	15.242	1379800	2				81	292	TRUE	302	549	1071;1072	1071
sp|Q9I3F5|ACNA_PSEAE	sp|Q9I3F5|ACNA_PSEAE	9	9	9	>sp|Q9I3F5|ACNA_PSEAE Aconitate hydratase A OS=Pseudomonas aeruginosa (strain ATCC 15692 / PAO1 / 1C / PRS 101 / LMG 12228) GN=acnA PE=3 SV=1	1	9	9	9	15.3	15.3	15.3	99.147	910	910	0	83.175	32347000	22				82	104;187;237;408;421;424;447;452;499	True;True;True;True;True;True;True;True;True	110;194;246;424;437;440;465;470;518	194;324;436;437;787;804;808;809;850;851;856;857;962;963	409;647;867;868;1688;1689;1690;1708;1709;1713;1714;1715;1716;1717;1804;1805;1806;1811;1812;2034;2035;2036	409;647;867;1688;1708;1713;1805;1811;2034
sp|Q9I576|HPPD_PSEAE	sp|Q9I576|HPPD_PSEAE	2	2	2	>sp|Q9I576|HPPD_PSEAE 4-hydroxyphenylpyruvate dioxygenase OS=Pseudomonas aeruginosa (strain ATCC 15692 / PAO1 / 1C / PRS 101 / LMG 12228) GN=hpd PE=3 SV=1	1	2	2	2	7.8	7.8	7.8	39.912	357	357	0	28.17	3298700	6				83	31;326	True;True	33;340	60;641;642	164;1350;1351;1352;1353;1354;1355	164;1350
sp|Q9I589|CBPD_PSEAE	sp|Q9I589|CBPD_PSEAE	1	1	1	>sp|Q9I589|CBPD_PSEAE Chitin-binding protein CbpD OS=Pseudomonas aeruginosa (strain ATCC 15692 / PAO1 / 1C / PRS 101 / LMG 12228) GN=cbpD PE=1 SV=1	1	1	1	1	3.6	3.6	3.6	41.916	389	389	0	6.1683	923630	1				84	57	TRUE	61	111	265	265
sp|Q9I685|SAHH_PSEAE	sp|Q9I685|SAHH_PSEAE	10	10	10	>sp|Q9I685|SAHH_PSEAE Adenosylhomocysteinase OS=Pseudomonas aeruginosa (strain ATCC 15692 / PAO1 / 1C / PRS 101 / LMG 12228) GN=ahcY PE=3 SV=1	1	10	10	10	28.1	28.1	28.1	51.399	469	469	0	78.08	35355000	29				85	112;144;198;212;225;297;362;422;459;485	True;True;True;True;True;True;True;True;True;True	118;150;206;221;234;307;376;438;477;504	208;209;254;255;343;344;369;370;417;418;555;703;805;806;868;869;916	429;430;431;432;433;509;510;511;689;690;691;692;728;729;730;731;732;733;832;833;1084;1447;1448;1710;1711;1837;1838;1839;1840;1841;1939	432;509;689;731;832;1084;1448;1710;1837;1939
sp|Q9I6M4|DAVT_PSEAE	sp|Q9I6M4|DAVT_PSEAE	1	1	1	>sp|Q9I6M4|DAVT_PSEAE 5-aminovalerate aminotransferase DavT OS=Pseudomonas aeruginosa (strain ATCC 15692 / PAO1 / 1C / PRS 101 / LMG 12228) GN=davT PE=1 SV=1	1	1	1	1	4.9	4.9	4.9	45.22	426	426	0	8.8241	1338200	1				86	402	TRUE	418	779	1677	1677
sp|Q9I6M5|DAVD_PSEAE	sp|Q9I6M5|DAVD_PSEAE	2	2	2	>sp|Q9I6M5|DAVD_PSEAE Glutarate-semialdehyde dehydrogenase DavD OS=Pseudomonas aeruginosa (strain ATCC 15692 / PAO1 / 1C / PRS 101 / LMG 12228) GN=davD PE=1 SV=1	1	2	2	2	7.2	7.2	7.2	51.622	483	483	0	31.954	2991500	4				87	278;455	True;True	288;473	528;861	1032;1033;1823;1824	1032;1824
sp|Q9I747|HCP1_PSEAE	sp|Q9I747|HCP1_PSEAE	2	2	2	>sp|Q9I747|HCP1_PSEAE Protein hcp1 OS=Pseudomonas aeruginosa (strain ATCC 15692 / PAO1 / 1C / PRS 101 / LMG 12228) GN=hcp1 PE=1 SV=1	1	2	2	2	16.7	16.7	16.7	17.414	162	162	0	14.675	3857300	3				88	120;458	True;True	126;476	220;866;867	452;1835;1836	452;1835
sp|Q9S508|PHZB2_PSEAE	sp|Q9S508|PHZB2_PSEAE	4	1	1	>sp|Q9S508|PHZB2_PSEAE Phenazine biosynthesis protein PhzB 2 OS=Pseudomonas aeruginosa (strain ATCC 15692 / PAO1 / 1C / PRS 101 / LMG 12228) GN=phzB2 PE=1 SV=1	1	4	1	1	24.7	10.5	10.5	19.027	162	162	0	10.825	11042000	5				89	40;41;310;338	False;False;True;False	42;43;322;352	75;76;77;78;578;579;663	188;189;190;191;192;193;1134;1135;1136;1137;1138;1385	191;192;1137;1385
tr|Q9HTD1|Q9HTD1_PSEAE	tr|Q9HTD1|Q9HTD1_PSEAE	33	33	33	>tr|Q9HTD1|Q9HTD1_PSEAE Probable transcarboxylase subunit OS=Pseudomonas aeruginosa (strain ATCC 15692 / PAO1 / 1C / PRS 101 / LMG 12228) GN=PA5435 PE=4 SV=1	1	33	33	33	58.8	58.8	58.8	66.095	607	607	0	320.62	822550000	257				90	3;6;43;44;51;52;65;74;89;95;130;141;163;166;167;179;186;193;229;308;347;364;365;403;456;465;466;467;469;492;493;495;497	True;True;True;True;True;True;True;True;True;True;True;True;True;True;True;True;True;True;True;True;True;True;True;True;True;True;True;True;True;True;True;True;True	3;6;45;46;47;55;56;69;79;94;95;101;136;147;169;172;173;174;186;193;200;201;238;319;320;361;378;379;380;419;474;483;484;485;486;488;511;512;514;516	6;7;11;12;13;14;81;82;83;84;85;86;101;102;103;125;126;140;141;166;167;168;169;178;179;180;181;237;238;250;251;285;286;287;292;293;294;295;314;315;322;323;332;333;334;335;426;573;574;575;576;678;679;680;681;705;706;707;708;709;710;711;780;781;862;863;880;881;882;883;884;885;886;887;888;890;946;947;948;949;950;951;953;954;955;956;958;959;960	34;35;36;37;38;39;43;44;45;46;47;48;49;50;51;52;53;54;55;56;57;58;59;60;61;62;63;197;198;199;200;201;202;203;204;205;206;207;208;248;249;250;251;252;286;287;306;307;357;358;359;360;361;362;363;364;365;382;383;384;385;386;387;388;389;390;391;392;393;394;395;396;482;483;484;485;486;502;503;504;557;558;559;560;561;562;563;564;565;572;573;574;575;576;577;578;579;580;581;582;583;584;585;586;587;588;58…	37;61;205;208;249;252;286;306;362;395;485;504;557;574;596;634;645;670;849;1126;1419;1454;1463;1679;1826;1884;1895;1902;1905;2004;2012;2023;2029	10;11;12;13;14;15;16;17	125;169;172;182;274;306;323;435
tr|Q9HTD9|Q9HTD9_PSEAE	tr|Q9HTD9|Q9HTD9_PSEAE	1	1	1	>tr|Q9HTD9|Q9HTD9_PSEAE Alcohol dehydrogenase OS=Pseudomonas aeruginosa (strain ATCC 15692 / PAO1 / 1C / PRS 101 / LMG 12228) GN=adhA PE=1 SV=1	1	1	1	1	5	5	5	35.911	342	342	0	7.9725	1771800	2				91	190	TRUE	197	329	662;663	663
tr|Q9HTJ6|Q9HTJ6_PSEAE	tr|Q9HTJ6|Q9HTJ6_PSEAE	1	1	1	>tr|Q9HTJ6|Q9HTJ6_PSEAE Probable two-component response regulator OS=Pseudomonas aeruginosa (strain ATCC 15692 / PAO1 / 1C / PRS 101 / LMG 12228) GN=PA5364 PE=4 SV=1	1	1	1	1	2.7	2.7	2.7	32.401	300	300	0.0075758	5.4537	0	1				92	99	TRUE	105	188	403	403
tr|Q9HTP2|Q9HTP2_PSEAE	tr|Q9HTP2|Q9HTP2_PSEAE	4	4	4	>tr|Q9HTP2|Q9HTP2_PSEAE Probable aldehyde dehydrogenase OS=Pseudomonas aeruginosa (strain ATCC 15692 / PAO1 / 1C / PRS 101 / LMG 12228) GN=PA5312 PE=3 SV=1	1	4	4	4	11.7	11.7	11.7	53.143	497	497	0	25.44	3354300	5				93	131;182;220;260	True;True;True;True	137;189;229;269	239;318;411;474	487;637;638;824;947	487;637;824;947
tr|Q9HUC3|Q9HUC3_PSEAE	tr|Q9HUC3|Q9HUC3_PSEAE	1	1	1	>tr|Q9HUC3|Q9HUC3_PSEAE Polyhydroxyalkanoate synthesis protein PhaF OS=Pseudomonas aeruginosa (strain ATCC 15692 / PAO1 / 1C / PRS 101 / LMG 12228) GN=phaF PE=4 SV=1	1	1	1	1	2.3	2.3	2.3	30.577	309	309	0	5.6688	1294700	2				94	247	TRUE	256	452;453	886;887	887
tr|Q9HUD3|Q9HUD3_PSEAE	tr|Q9HUD3|Q9HUD3_PSEAE	2	2	2	>tr|Q9HUD3|Q9HUD3_PSEAE Malic enzyme OS=Pseudomonas aeruginosa (strain ATCC 15692 / PAO1 / 1C / PRS 101 / LMG 12228) GN=PA5046 PE=4 SV=1	1	2	2	2	7.6	7.6	7.6	45.428	422	422	0	17.404	1704000	2				95	0;363	True;True	0;377	0;704	0;1449	0;1449
tr|Q9HVS8|Q9HVS8_PSEAE	tr|Q9HVS8|Q9HVS8_PSEAE	1	1	1	>tr|Q9HVS8|Q9HVS8_PSEAE RoxR OS=Pseudomonas aeruginosa (strain ATCC 15692 / PAO1 / 1C / PRS 101 / LMG 12228) GN=roxR PE=4 SV=1	1	1	1	1	7.5	7.5	7.5	20.616	186	186	0.007874	5.5222	0	1				96	445	TRUE	463	845	1796	1796
tr|Q9HW49|Q9HW49_PSEAE	tr|Q9HW49|Q9HW49_PSEAE	6	6	6	>tr|Q9HW49|Q9HW49_PSEAE Uncharacterized protein OS=Pseudomonas aeruginosa (strain ATCC 15692 / PAO1 / 1C / PRS 101 / LMG 12228) GN=PA4352 PE=3 SV=1	1	6	6	6	37.4	37.4	37.4	30.972	286	286	0	49.406	19976000	21				97	67;235;430;433;434;451	True;True;True;True;True;True	71;72;244;446;450;451;452;469	128;129;130;434;819;820;821;827;828;829;830;855	289;290;291;292;293;864;865;1758;1759;1760;1768;1769;1770;1771;1772;1773;1774;1775;1776;1777;1778;1810	291;865;1758;1770;1778;1810	18;19	100;158
tr|Q9HWV0|Q9HWV0_PSEAE	tr|Q9HWV0|Q9HWV0_PSEAE	4	4	4	>tr|Q9HWV0|Q9HWV0_PSEAE Probable nonribosomal peptide synthetase OS=Pseudomonas aeruginosa (strain ATCC 15692 / PAO1 / 1C / PRS 101 / LMG 12228) GN=PA4078 PE=4 SV=1	1	4	4	4	6.1	6.1	6.1	110.35	991	991	0	31.166	4451300	6				98	106;133;281;371	True;True;True;True	112;139;291;386	197;198;241;533;719	413;414;415;489;1040;1484	415;489;1040;1484
tr|Q9HX05|Q9HX05_PSEAE;tr|Q9I2C4|Q9I2C4_PSEAE	tr|Q9HX05|Q9HX05_PSEAE;tr|Q9I2C4|Q9I2C4_PSEAE	2;1	2;1	2;1	>tr|Q9HX05|Q9HX05_PSEAE Probable aldehyde dehydrogenase OS=Pseudomonas aeruginosa (strain ATCC 15692 / PAO1 / 1C / PRS 101 / LMG 12228) GN=PA4022 PE=3 SV=1;>tr|Q9I2C4|Q9I2C4_PSEAE NAD+ dependent aldehyde dehydrogenase ExaC OS=Pseudomonas aeruginosa (strain	2	2	2	2	5.5	5.5	5.5	54.979	506	506;506	0	11.331	2351200	2				99	488;494	True;True	507;513	920;952	1944;2017;2018	1944;2018
tr|Q9HXU8|Q9HXU8_PSEAE	tr|Q9HXU8|Q9HXU8_PSEAE	1	1	1	>tr|Q9HXU8|Q9HXU8_PSEAE Lipotoxon F, LptF OS=Pseudomonas aeruginosa (strain ATCC 15692 / PAO1 / 1C / PRS 101 / LMG 12228) GN=lptF PE=3 SV=1	1	1	1	1	5	5	5	28.514	261	261	0	16.543	615930	3				100	323	TRUE	337	606;607	1193;1194;1195	1193
tr|Q9HY13|Q9HY13_PSEAE	tr|Q9HY13|Q9HY13_PSEAE	1	1	1	>tr|Q9HY13|Q9HY13_PSEAE Uncharacterized protein OS=Pseudomonas aeruginosa (strain ATCC 15692 / PAO1 / 1C / PRS 101 / LMG 12228) GN=PA3613 PE=4 SV=1	1	1	1	1	1.9	1.9	1.9	88.378	801	801	0	5.9753	975250	1				101	395	TRUE	411	765	1636	1636
tr|Q9HY79|Q9HY79_PSEAE	tr|Q9HY79|Q9HY79_PSEAE	1	1	1	>tr|Q9HY79|Q9HY79_PSEAE Ferroxidase OS=Pseudomonas aeruginosa (strain ATCC 15692 / PAO1 / 1C / PRS 101 / LMG 12228) GN=bfrB PE=1 SV=1	1	1	1	1	10.8	10.8	10.8	18.553	158	158	0	5.8273	1226500	2				102	208	TRUE	217	364	721;722	722
tr|Q9HY81|Q9HY81_PSEAE	tr|Q9HY81|Q9HY81_PSEAE	4	4	4	>tr|Q9HY81|Q9HY81_PSEAE Probable peroxidase OS=Pseudomonas aeruginosa (strain ATCC 15692 / PAO1 / 1C / PRS 101 / LMG 12228) GN=PA3529 PE=1 SV=1	1	4	4	4	25	25	25	21.822	200	200	0	41.165	48181000	17				103	71;334;342;383	True;True;True;True	76;348;356;399	136;137;656;657;669;670;738;739	299;300;301;302;303;1372;1373;1374;1396;1397;1398;1537;1538;1539;1540;1541;1542	299;1373;1398;1538
tr|Q9HYE7|Q9HYE7_PSEAE	tr|Q9HYE7|Q9HYE7_PSEAE	2	2	2	>tr|Q9HYE7|Q9HYE7_PSEAE Probable glutamine amidotransferase OS=Pseudomonas aeruginosa (strain ATCC 15692 / PAO1 / 1C / PRS 101 / LMG 12228) GN=PA3459 PE=4 SV=1	1	2	2	2	4.8	4.8	4.8	66.027	589	589	0	10.585	8049600	2				104	285;286	True;True	295;296	538;539	1046;1047	1046;1047
tr|Q9HYK2|Q9HYK2_PSEAE	tr|Q9HYK2|Q9HYK2_PSEAE	1	1	1	>tr|Q9HYK2|Q9HYK2_PSEAE Uncharacterized protein OS=Pseudomonas aeruginosa (strain ATCC 15692 / PAO1 / 1C / PRS 101 / LMG 12228) GN=PA3402 PE=4 SV=1	1	1	1	1	5.6	5.6	5.6	36.206	323	323	1	-2	0	1	+			105	218	TRUE	227	409	822	822	20	258
tr|Q9HYT5|Q9HYT5_PSEAE	tr|Q9HYT5|Q9HYT5_PSEAE	5	5	5	>tr|Q9HYT5|Q9HYT5_PSEAE Uncharacterized protein OS=Pseudomonas aeruginosa (strain ATCC 15692 / PAO1 / 1C / PRS 101 / LMG 12228) GN=PA3309 PE=3 SV=1	1	5	5	5	46.4	46.4	46.4	16.496	151	151	0	39.915	74696000	15				106	175;191;211;273;442	True;True;True;True;True	182;198;220;282;283;460	307;308;330;367;368;517;518;519;520;841;842	625;626;627;664;665;726;727;1017;1018;1019;1020;1021;1022;1789;1790;1791;1792	626;665;726;1021;1790	21	129
tr|Q9HZ60|Q9HZ60_PSEAE	tr|Q9HZ60|Q9HZ60_PSEAE	1	1	1	>tr|Q9HZ60|Q9HZ60_PSEAE Probable transcriptional regulator OS=Pseudomonas aeruginosa (strain ATCC 15692 / PAO1 / 1C / PRS 101 / LMG 12228) GN=PA3174 PE=4 SV=1	1	1	1	1	7.4	7.4	7.4	26.779	242	242	0	5.5493	0	1				107	73	TRUE	78	139	305	305
tr|Q9HZK4|Q9HZK4_PSEAE	tr|Q9HZK4|Q9HZK4_PSEAE	4	4	4	>tr|Q9HZK4|Q9HZK4_PSEAE Glyceraldehyde-3-phosphate dehydrogenase OS=Pseudomonas aeruginosa (strain ATCC 15692 / PAO1 / 1C / PRS 101 / LMG 12228) GN=PA3001 PE=3 SV=1	1	4	4	4	11.7	11.7	11.7	50.111	461	461	0	33.759	10059000	6				108	101;251;360;461	True;True;True;True	107;260;374;479	191;458;701;872;873	406;894;1444;1847;1848;1849	406;894;1444;1849
tr|Q9I017|Q9I017_PSEAE	tr|Q9I017|Q9I017_PSEAE	1	1	1	>tr|Q9I017|Q9I017_PSEAE Glutathione peroxidase OS=Pseudomonas aeruginosa (strain ATCC 15692 / PAO1 / 1C / PRS 101 / LMG 12228) GN=PA2826 PE=3 SV=1	1	1	1	1	11.2	11.2	11.2	17.659	161	161	0.0074627	5.4408	14786000	1				109	315	TRUE	328	588	1156	1156	22	1
tr|Q9I028|Q9I028_PSEAE	tr|Q9I028|Q9I028_PSEAE	5	5	5	>tr|Q9I028|Q9I028_PSEAE Probable acyl-CoA dehydrogenase OS=Pseudomonas aeruginosa (strain ATCC 15692 / PAO1 / 1C / PRS 101 / LMG 12228) GN=PA2815 PE=4 SV=1	1	5	5	5	12.6	12.6	12.6	88.762	815	815	0	37.282	15933000	10				110	117;195;210;252;463	True;True;True;True;True	123;203;219;261;481	216;338;366;459;876;877	443;444;683;725;895;896;1863;1864;1865;1866;1867	443;683;725;895;1864
tr|Q9I056|Q9I056_PSEAE	tr|Q9I056|Q9I056_PSEAE	1	1	1	>tr|Q9I056|Q9I056_PSEAE Carboxypeptidase G2 OS=Pseudomonas aeruginosa (strain ATCC 15692 / PAO1 / 1C / PRS 101 / LMG 12228) GN=cpg2 PE=4 SV=1	1	1	1	1	3.4	3.4	3.4	44.007	412	412	0.0078125	5.5114	891490	2				111	302	TRUE	312	561;562	1092;1093	1092
tr|Q9I0L5|Q9I0L5_PSEAE	tr|Q9I0L5|Q9I0L5_PSEAE	8	8	8	>tr|Q9I0L5|Q9I0L5_PSEAE Isocitrate dehydrogenase [NADP] OS=Pseudomonas aeruginosa (strain ATCC 15692 / PAO1 / 1C / PRS 101 / LMG 12228) GN=icd PE=3 SV=1	1	8	8	8	28	28	28	45.577	418	418	0	84.278	39756000	27				112	39;61;136;161;176;337;457;483	True;True;True;True;True;True;True;True	41;65;142;167;183;351;475;502	73;74;118;119;244;282;283;309;661;662;864;865;913;914	186;187;277;278;493;494;552;553;554;555;628;1379;1380;1381;1382;1383;1384;1827;1828;1829;1830;1831;1832;1833;1834;1936;1937	186;277;493;555;628;1379;1829;1937
tr|Q9I0T1|Q9I0T1_PSEAE	tr|Q9I0T1|Q9I0T1_PSEAE	4	4	4	>tr|Q9I0T1|Q9I0T1_PSEAE Probable acyl-CoA thiolase OS=Pseudomonas aeruginosa (strain ATCC 15692 / PAO1 / 1C / PRS 101 / LMG 12228) GN=PA2553 PE=3 SV=1	1	4	4	4	12.6	12.6	12.6	41.4	396	396	0	36.325	12040000	7				113	92;98;410;412	True;True;True;True	98;104;426;428	173;174;186;187;789;791	377;378;401;402;1692;1694;1695	377;402;1692;1695
tr|Q9I1E7|Q9I1E7_PSEAE	tr|Q9I1E7|Q9I1E7_PSEAE	2	2	2	>tr|Q9I1E7|Q9I1E7_PSEAE Alkyl hydroperoxide reductase AhpD OS=Pseudomonas aeruginosa (strain ATCC 15692 / PAO1 / 1C / PRS 101 / LMG 12228) GN=PA2331 PE=3 SV=1	1	2	2	2	11.8	11.8	11.8	19.904	186	186	0	14.714	2149700	2				114	139;282	True;True	145;292	247;534	498;1041	498;1041
tr|Q9I1E8|Q9I1E8_PSEAE	tr|Q9I1E8|Q9I1E8_PSEAE	1	1	1	>tr|Q9I1E8|Q9I1E8_PSEAE Uncharacterized protein OS=Pseudomonas aeruginosa (strain ATCC 15692 / PAO1 / 1C / PRS 101 / LMG 12228) GN=PA2330 PE=4 SV=1	1	1	1	1	3.9	3.9	3.9	37.68	355	355	0	7.6254	846440	1				115	256	TRUE	265	467	929	929
tr|Q9I1H5|Q9I1H5_PSEAE	tr|Q9I1H5|Q9I1H5_PSEAE	2	2	2	>tr|Q9I1H5|Q9I1H5_PSEAE Chitinase OS=Pseudomonas aeruginosa (strain ATCC 15692 / PAO1 / 1C / PRS 101 / LMG 12228) GN=chiC PE=3 SV=1	1	2	2	2	4.3	4.3	4.3	53.042	483	483	0	12.253	1987400	2				116	185;428	True;True	192;444	321;816	641;1752	641;1752
tr|Q9I246|Q9I246_PSEAE	tr|Q9I246|Q9I246_PSEAE	9	9	9	>tr|Q9I246|Q9I246_PSEAE Probable carbamoyl transferase OS=Pseudomonas aeruginosa (strain ATCC 15692 / PAO1 / 1C / PRS 101 / LMG 12228) GN=PA2069 PE=4 SV=1	1	9	9	9	21.3	21.3	21.3	63.382	574	574	0	79.677	36838000	22				117	80;177;184;217;270;344;359;370;376	True;True;True;True;True;True;True;True;True	85;184;191;226;279;358;373;385;391	150;151;310;311;320;407;408;511;512;673;674;698;699;700;717;718;725;726	327;328;629;630;640;818;819;820;821;1005;1006;1401;1402;1440;1441;1442;1443;1481;1482;1483;1492;1493;1494	327;629;640;818;1005;1401;1442;1482;1492
tr|Q9I299|Q9I299_PSEAE	tr|Q9I299|Q9I299_PSEAE	14	14	14	>tr|Q9I299|Q9I299_PSEAE Methylcrotonyl-CoA carboxylase, alpha-subunit (Biotin-containing) OS=Pseudomonas aeruginosa (strain ATCC 15692 / PAO1 / 1C / PRS 101 / LMG 12228) GN=liuD PE=1 SV=1	1	14	14	14	32.1	32.1	32.1	71.282	655	655	0	102.5	58253000	28				118	32;36;94;103;142;178;197;199;207;243;267;300;475;476	True;True;True;True;True;True;True;True;True;True;True;True;True;True	34;38;100;109;148;185;205;207;216;252;276;310;494;495	61;68;69;176;177;193;252;312;313;341;342;345;362;363;445;446;507;559;899;900;901	165;166;176;177;178;179;380;381;408;505;506;507;631;632;687;688;693;718;719;720;877;878;1001;1090;1916;1917;1918;1919	165;179;380;408;506;632;687;693;720;878;1001;1090;1916;1918
tr|Q9I2A2|Q9I2A2_PSEAE	tr|Q9I2A2|Q9I2A2_PSEAE	1	1	1	>tr|Q9I2A2|Q9I2A2_PSEAE Fumarylacetoacetase OS=Pseudomonas aeruginosa (strain ATCC 15692 / PAO1 / 1C / PRS 101 / LMG 12228) GN=fahA PE=4 SV=1	1	1	1	1	4.9	4.9	4.9	46.341	432	432	0.0075188	5.4459	365070	1				119	369	TRUE	384	716	1480	1480
tr|Q9I2A6|Q9I2A6_PSEAE	tr|Q9I2A6|Q9I2A6_PSEAE	1	1	1	>tr|Q9I2A6|Q9I2A6_PSEAE 3-hydroxybutyrate dehydrogenase OS=Pseudomonas aeruginosa (strain ATCC 15692 / PAO1 / 1C / PRS 101 / LMG 12228) GN=bdhA PE=3 SV=1	1	1	1	1	6.2	6.2	6.2	26.727	256	256	0	6.1434	1013600	1				120	219	TRUE	228	410	823	823
tr|Q9I2A9|Q9I2A9_PSEAE	tr|Q9I2A9|Q9I2A9_PSEAE	1	1	1	>tr|Q9I2A9|Q9I2A9_PSEAE DhcB, dehydrocarnitine CoA transferase, subunit B OS=Pseudomonas aeruginosa (strain ATCC 15692 / PAO1 / 1C / PRS 101 / LMG 12228) GN=dhcB PE=4 SV=1	1	1	1	1	11	11	11	23.187	218	218	0	6.8862	1638600	3				121	159	TRUE	165	279;280	548;549;550	548
tr|Q9I2V3|Q9I2V3_PSEAE	tr|Q9I2V3|Q9I2V3_PSEAE	2	2	2	>tr|Q9I2V3|Q9I2V3_PSEAE Uncharacterized protein OS=Pseudomonas aeruginosa (strain ATCC 15692 / PAO1 / 1C / PRS 101 / LMG 12228) GN=PA1789 PE=1 SV=1	1	2	2	2	11.5	11.5	11.5	31.273	287	287	0	10.792	2667300	2				122	205;375	True;True	214;390	359;724	715;1491	715;1491
tr|Q9I2W9|Q9I2W9_PSEAE	tr|Q9I2W9|Q9I2W9_PSEAE	2	2	2	>tr|Q9I2W9|Q9I2W9_PSEAE Phosphoenolpyruvate synthase OS=Pseudomonas aeruginosa (strain ATCC 15692 / PAO1 / 1C / PRS 101 / LMG 12228) GN=ppsA PE=3 SV=1	1	2	2	2	3.7	3.7	3.7	85.816	791	791	0	20.874	3064100	2				123	11;125	True;True	11;131	23;228	77;470	77;470
tr|Q9I3B2|Q9I3B2_PSEAE	tr|Q9I3B2|Q9I3B2_PSEAE	1	1	1	>tr|Q9I3B2|Q9I3B2_PSEAE Beta-ketoacyl-ACP synthase I OS=Pseudomonas aeruginosa (strain ATCC 15692 / PAO1 / 1C / PRS 101 / LMG 12228) GN=fabB PE=3 SV=1	1	1	1	1	2.7	2.7	2.7	42.806	405	405	0	5.8241	0	1				124	134	TRUE	140	242	490	490
tr|Q9I3D3|Q9I3D3_PSEAE	tr|Q9I3D3|Q9I3D3_PSEAE	6	6	6	>tr|Q9I3D3|Q9I3D3_PSEAE 2-oxoglutarate dehydrogenase (E1 subunit) OS=Pseudomonas aeruginosa (strain ATCC 15692 / PAO1 / 1C / PRS 101 / LMG 12228) GN=sucA PE=4 SV=1	1	6	6	6	10	10	10	105.88	943	943	0	47.314	20671000	24				125	78;158;279;280;304;311	True;True;True;True;True;True	83;164;289;290;314;315;323	148;277;278;529;530;531;532;565;566;567;580;581	324;325;546;547;1034;1035;1036;1037;1038;1039;1097;1098;1099;1100;1101;1102;1103;1104;1105;1106;1107;1139;1140;1141	325;546;1034;1037;1098;1141	23	592
tr|Q9I3D4|Q9I3D4_PSEAE	tr|Q9I3D4|Q9I3D4_PSEAE	3	3	3	>tr|Q9I3D4|Q9I3D4_PSEAE Succinate dehydrogenase (B subunit) OS=Pseudomonas aeruginosa (strain ATCC 15692 / PAO1 / 1C / PRS 101 / LMG 12228) GN=sdhB PE=4 SV=1	1	3	3	3	15.7	15.7	15.7	26.155	235	235	0	23.438	5040400	4				126	129;241;296	True;True;True	135;250;306	235;236;443;554	480;481;875;1083	480;875;1083
tr|Q9I3D5|Q9I3D5_PSEAE	tr|Q9I3D5|Q9I3D5_PSEAE	5	5	5	>tr|Q9I3D5|Q9I3D5_PSEAE Succinate dehydrogenase flavoprotein subunit OS=Pseudomonas aeruginosa (strain ATCC 15692 / PAO1 / 1C / PRS 101 / LMG 12228) GN=sdhA PE=3 SV=1	1	5	5	5	10.2	10.2	10.2	63.531	590	590	0	52.45	33268000	27				127	143;150;188;189;257	True;True;True;True;True	149;156;195;196;266	253;263;264;325;326;327;328;468;469;470	508;521;522;523;648;649;650;651;652;653;654;655;656;657;658;659;660;661;930;931;932;933;934;935;936;937;938	508;521;651;655;935
tr|Q9I3G1|Q9I3G1_PSEAE	tr|Q9I3G1|Q9I3G1_PSEAE	1	1	1	>tr|Q9I3G1|Q9I3G1_PSEAE Cytochrome c oxidase, cbb3-type, CcoO subunit OS=Pseudomonas aeruginosa (strain ATCC 15692 / PAO1 / 1C / PRS 101 / LMG 12228) GN=ccoO2 PE=4 SV=1	1	1	1	1	8.9	8.9	8.9	22.778	202	202	0	18.194	484780	1				128	398	TRUE	414	770	1644	1644
tr|Q9I3G6|Q9I3G6_PSEAE	tr|Q9I3G6|Q9I3G6_PSEAE	1	1	1	>tr|Q9I3G6|Q9I3G6_PSEAE Probable ferredoxin OS=Pseudomonas aeruginosa (strain ATCC 15692 / PAO1 / 1C / PRS 101 / LMG 12228) GN=PA1551 PE=4 SV=1	1	1	1	1	2.1	2.1	2.1	53.62	471	471	0	7.6196	0	1				129	155	TRUE	161	274	543	543
tr|Q9I5E3|Q9I5E3_PSEAE	tr|Q9I5E3|Q9I5E3_PSEAE	2	2	2	>tr|Q9I5E3|Q9I5E3_PSEAE Citrate synthase OS=Pseudomonas aeruginosa (strain ATCC 15692 / PAO1 / 1C / PRS 101 / LMG 12228) GN=prpC PE=3 SV=1	1	2	2	2	7.5	7.5	7.5	41.689	375	375	0	18.937	2442800	3				130	202;266	True;True	210;275	350;351;506	698;699;1000	699;1000
tr|Q9I5F6|Q9I5F6_PSEAE	tr|Q9I5F6|Q9I5F6_PSEAE	1	1	1	>tr|Q9I5F6|Q9I5F6_PSEAE Bifunctional protein PutA OS=Pseudomonas aeruginosa (strain ATCC 15692 / PAO1 / 1C / PRS 101 / LMG 12228) GN=putA PE=3 SV=1	1	1	1	1	1.4	1.4	1.4	115.63	1060	1060	0	8.4187	409320	1				131	295	TRUE	305	553	1082	1082
tr|Q9I5U9|Q9I5U9_PSEAE	tr|Q9I5U9|Q9I5U9_PSEAE	11	11	11	>tr|Q9I5U9|Q9I5U9_PSEAE Uncharacterized protein OS=Pseudomonas aeruginosa (strain ATCC 15692 / PAO1 / 1C / PRS 101 / LMG 12228) GN=PA0588 PE=4 SV=1	1	11	11	11	22.2	22.2	22.2	73.722	640	640	0	105.43	41952000	23				132	48;265;269;271;275;303;306;312;328;399;480	True;True;True;True;True;True;True;True;True;True;True	52;274;278;280;285;313;317;324;342;415;499	97;98;503;504;505;510;513;514;523;524;563;564;570;582;645;646;771;908;909	242;243;244;245;996;997;998;999;1004;1007;1008;1027;1028;1094;1095;1096;1112;1142;1359;1360;1645;1930;1931	244;996;1004;1008;1028;1094;1112;1142;1360;1645;1931
tr|Q9I5W1|Q9I5W1_PSEAE	tr|Q9I5W1|Q9I5W1_PSEAE	1	1	1	>tr|Q9I5W1|Q9I5W1_PSEAE Uncharacterized protein OS=Pseudomonas aeruginosa (strain ATCC 15692 / PAO1 / 1C / PRS 101 / LMG 12228) GN=PA0575 PE=4 SV=1	1	1	1	1	1.4	1.4	1.4	139.66	1245	1245	0.0072464	5.3902	1293100	1				133	157	TRUE	163	276	545	545	24	420
tr|Q9I5Y8|Q9I5Y8_PSEAE	tr|Q9I5Y8|Q9I5Y8_PSEAE	2	2	2	>tr|Q9I5Y8|Q9I5Y8_PSEAE Transketolase OS=Pseudomonas aeruginosa (strain ATCC 15692 / PAO1 / 1C / PRS 101 / LMG 12228) GN=tktA PE=1 SV=1	1	2	2	2	4.5	4.5	4.5	72.219	665	665	0	13.292	2456100	2				134	123;181	True;True	129;188	225;317	460;636	460;636
tr|Q9I612|Q9I612_PSEAE	tr|Q9I612|Q9I612_PSEAE	1	1	1	>tr|Q9I612|Q9I612_PSEAE Probable acyl-CoA dehydrogenase OS=Pseudomonas aeruginosa (strain ATCC 15692 / PAO1 / 1C / PRS 101 / LMG 12228) GN=PA0506 PE=3 SV=1	1	1	1	1	2	2	2	65.358	601	601	0.0076923	5.4835	267960	1				135	132	TRUE	138	240	488	488
tr|Q9I659|Q9I659_PSEAE;sp|Q9HVN5|CLPB_PSEAE	tr|Q9I659|Q9I659_PSEAE	5;1	5;1	5;1	>tr|Q9I659|Q9I659_PSEAE Probable ClpA/B protease ATP binding subunit OS=Pseudomonas aeruginosa (strain ATCC 15692 / PAO1 / 1C / PRS 101 / LMG 12228) GN=PA0459 PE=4 SV=1	2	5	5	5	7.9	7.9	7.9	94.174	850	850;854	0	34.829	3189200	7				136	21;135;318;325;336	True;True;True;True;True	22;141;331;339;350	40;41;243;592;640;660	121;122;491;492;1161;1349;1378	121;492;1161;1349;1378
tr|Q9I671|Q9I671_PSEAE	tr|Q9I671|Q9I671_PSEAE	1	1	1	>tr|Q9I671|Q9I671_PSEAE Glutaryl-CoA dehydrogenase OS=Pseudomonas aeruginosa (strain ATCC 15692 / PAO1 / 1C / PRS 101 / LMG 12228) GN=gcdH PE=3 SV=1	1	1	1	1	4.3	4.3	4.3	43.311	393	393	0	14.399	693570	1				137	320	TRUE	334	602	1187	1187
tr|Q9I6H5|Q9I6H5_PSEAE	tr|Q9I6H5|Q9I6H5_PSEAE	1	1	1	>tr|Q9I6H5|Q9I6H5_PSEAE D-3-phosphoglycerate dehydrogenase OS=Pseudomonas aeruginosa (strain ATCC 15692 / PAO1 / 1C / PRS 101 / LMG 12228) GN=serA PE=3 SV=1	1	1	1	1	3.7	3.7	3.7	44.216	409	409	0	13.992	636140	3				138	387	TRUE	403	746;747	1581;1582;1583	1582
tr|Q9I6J2|Q9I6J2_PSEAE	tr|Q9I6J2|Q9I6J2_PSEAE	2	2	2	>tr|Q9I6J2|Q9I6J2_PSEAE Putrescine aminotransferase OS=Pseudomonas aeruginosa (strain ATCC 15692 / PAO1 / 1C / PRS 101 / LMG 12228) GN=spuC PE=3 SV=1	1	2	2	2	7.7	7.7	7.7	50.452	456	456	0	10.938	1694500	1				139	114;484	True;True	120;503	212;915	437;1938	437;1938
tr|Q9I6Q7|Q9I6Q7_PSEAE	tr|Q9I6Q7|Q9I6Q7_PSEAE	1	1	1	>tr|Q9I6Q7|Q9I6Q7_PSEAE Beta-ketoadipate enol-lactone hydrolase OS=Pseudomonas aeruginosa (strain ATCC 15692 / PAO1 / 1C / PRS 101 / LMG 12228) GN=pcaD PE=4 SV=1	1	1	1	1	6.1	6.1	6.1	28.017	263	263	1	-2	8987700	1	+			140	147	TRUE	153	259	516	516	25	145
tr|Q9I6Z3|Q9I6Z3_PSEAE	tr|Q9I6Z3|Q9I6Z3_PSEAE	7	7	7	>tr|Q9I6Z3|Q9I6Z3_PSEAE Alkyl hydroperoxide reductase subunit C OS=Pseudomonas aeruginosa (strain ATCC 15692 / PAO1 / 1C / PRS 101 / LMG 12228) GN=ahpC PE=4 SV=1	1	7	7	7	51.3	51.3	51.3	20.541	187	187	0	52.947	71662000	14				141	55;127;165;378;404;419;479	True;True;True;True;True;True;True	59;133;171;393;420;435;498	107;108;231;232;290;291;729;730;782;783;802;906;907	257;258;259;473;474;569;570;571;1497;1498;1499;1682;1683;1706;1928;1929	259;473;571;1497;1683;1706;1928

## Sheet: 6-1 Sheet1
Protein IDs-C4HSL (full)
sp|O52759|RS4_PSEAE
sp|O52762|CATA_PSEAE
sp|O68822|AMPA_PSEAE
sp|Q9S508|PHZB2_PSEAE;sp|O69753|PHZB1_PSEAE
sp|P04739|FMPO_PSEAE
sp|P05384|DBHB_PSEAE
sp|P08308|OTCC_PSEAE
sp|P09591|EFTU_PSEAE
sp|P11221|OPRI_PSEAE
sp|P11436|AMIE_PSEAE
sp|P13794|PORF_PSEAE
sp|P13981|ARCA_PSEAE
sp|P30718|CH60_PSEAE
sp|P37799|BCCP_PSEAE
sp|P43336|PHHC_PSEAE
sp|P47204|FTSZ_PSEAE
sp|P53593|SUCC_PSEAE
sp|P53641|SODF_PSEAE
sp|P72173|AAT_PSEAE
sp|Q51561|RPOB_PSEAE
sp|Q51567|SUCD_PSEAE
sp|Q59637|ODP1_PSEAE
sp|Q9HT16|ATPF_PSEAE
sp|Q9HT18|ATPA_PSEAE
sp|Q9HU65|GLNA_PSEAE
sp|Q9HU83|HUTU_PSEAE
sp|Q9HV43|DNAK_PSEAE
sp|Q9HVA2|ILVC_PSEAE
sp|Q9HVY3|RS9_PSEAE
sp|Q9HWC9|RPOC_PSEAE
sp|Q9HWD2|EFG1_PSEAE;sp|Q9I244|EFG2_PSEAE
sp|Q9HWD8|RL2_PSEAE
sp|Q9HWE8|RS14_PSEAE
sp|Q9HXN2|PUR4_PSEAE
sp|Q9HXZ4|PYRG_PSEAE
sp|Q9HZ71|RS1_PSEAE
sp|Q9HZE0|DHE2_PSEAE
sp|Q9HZJ2|FADB_PSEAE
sp|Q9I0J6|NUOG_PSEAE
sp|Q9I0K4|ACEA_PSEAE
sp|Q9I2A8|ATOB_PSEAE
sp|Q9I2V5|ACNB_PSEAE
sp|Q9I3D1|DLDH2_PSEAE
sp|Q9I3F5|ACNA_PSEAE
sp|Q9I576|HPPD_PSEAE
sp|Q9I685|SAHH_PSEAE
sp|Q9I6M5|DAVD_PSEAE
tr|Q9HTD0|Q9HTD0_PSEAE
tr|Q9HTD1|Q9HTD1_PSEAE
tr|Q9HTD9|Q9HTD9_PSEAE
tr|Q9HTP2|Q9HTP2_PSEAE
tr|Q9HU07|Q9HU07_PSEAE
tr|Q9HUD3|Q9HUD3_PSEAE
tr|Q9HUK6|Q9HUK6_PSEAE
tr|Q9HW49|Q9HW49_PSEAE
tr|Q9HWV0|Q9HWV0_PSEAE
tr|Q9HY13|Q9HY13_PSEAE
tr|Q9HY81|Q9HY81_PSEAE
tr|Q9HYT5|Q9HYT5_PSEAE
tr|Q9I0L5|Q9I0L5_PSEAE
tr|Q9I0T1|Q9I0T1_PSEAE
tr|Q9I246|Q9I246_PSEAE
tr|Q9I297|Q9I297_PSEAE
tr|Q9I299|Q9I299_PSEAE
tr|Q9I3D3|Q9I3D3_PSEAE
tr|Q9I3D4|Q9I3D4_PSEAE
tr|Q9I3D5|Q9I3D5_PSEAE
tr|Q9I580|Q9I580_PSEAE
tr|Q9I5U9|Q9I5U9_PSEAE
tr|Q9I659|Q9I659_PSEAE
tr|Q9I671|Q9I671_PSEAE
tr|Q9I6Z3|Q9I6Z3_PSEAE
Probe 12 (subtracted)
REV__tr|Q9HXW2|Q9HXW2_PSEAE
sp|G3XD23|WBPB_PSEAE
sp|O69753|PHZB1_PSEAE
sp|O69754|PHZF_PSEAE
sp|O82850|RS2_PSEAE
sp|O82851|EFTS_PSEAE
sp|O86428|ILVE_PSEAE
sp|P13982|ARCC_PSEAE
sp|P15276|ALGP_PSEAE
sp|P28810|MMSA_PSEAE;tr|Q9I5I2|Q9I5I2_PSEAE
sp|P37798|ACCC_PSEAE
sp|P38100|CARB_PSEAE
sp|P40947|SSB_PSEAE
sp|P57668|TPX_PSEAE
sp|Q51342|PUR1_PSEAE
sp|Q59636|NDK_PSEAE
sp|Q9HT20|ATPB_PSEAE
sp|Q9HTD7|ASPA_PSEAE
sp|Q9HU21|RMLC_PSEAE
sp|Q9HUM6|PURA_PSEAE
sp|Q9HV59|PNP_PSEAE
sp|Q9HV69|PANC_PSEAE
sp|Q9HWC8|RL7_PSEAE
sp|Q9HWD1|RS7_PSEAE
sp|Q9HWD5|RL3_PSEAE
sp|Q9HWE1|RS3_PSEAE
sp|Q9HWE5|RL14_PSEAE
sp|Q9HWF2|RS5_PSEAE
sp|Q9HYR9|CLPP2_PSEAE
sp|Q9HZP6|ETFB_PSEAE
sp|Q9I1L9|DLDH1_PSEAE
sp|Q9I1M0|ODB2_PSEAE
sp|Q9I2U1|CLPP1_PSEAE
sp|Q9I2W7|RRAAH_PSEAE
sp|Q9I3C5|HTPG_PSEAE
sp|Q9I3D2|ODO2_PSEAE
sp|Q9I589|CBPD_PSEAE
sp|Q9I6M4|DAVT_PSEAE
sp|Q9I747|HCP1_PSEAE
sp|Q9S508|PHZB2_PSEAE
tr|Q9HTJ6|Q9HTJ6_PSEAE
tr|Q9HUC3|Q9HUC3_PSEAE
tr|Q9HVS8|Q9HVS8_PSEAE
tr|Q9HX05|Q9HX05_PSEAE;tr|Q9I2C4|Q9I2C4_PSEAE
tr|Q9HXU8|Q9HXU8_PSEAE
tr|Q9HY79|Q9HY79_PSEAE
tr|Q9HYE7|Q9HYE7_PSEAE
tr|Q9HYK2|Q9HYK2_PSEAE
tr|Q9HZ60|Q9HZ60_PSEAE
tr|Q9HZK4|Q9HZK4_PSEAE
tr|Q9I017|Q9I017_PSEAE
tr|Q9I028|Q9I028_PSEAE
tr|Q9I056|Q9I056_PSEAE
tr|Q9I1E7|Q9I1E7_PSEAE
tr|Q9I1E8|Q9I1E8_PSEAE
tr|Q9I1H5|Q9I1H5_PSEAE
tr|Q9I2A2|Q9I2A2_PSEAE
tr|Q9I2A6|Q9I2A6_PSEAE
tr|Q9I2A9|Q9I2A9_PSEAE
tr|Q9I2V3|Q9I2V3_PSEAE
tr|Q9I2W9|Q9I2W9_PSEAE
tr|Q9I3B2|Q9I3B2_PSEAE
tr|Q9I3G1|Q9I3G1_PSEAE
tr|Q9I3G6|Q9I3G6_PSEAE
tr|Q9I5E3|Q9I5E3_PSEAE
tr|Q9I5F6|Q9I5F6_PSEAE
tr|Q9I5W1|Q9I5W1_PSEAE
tr|Q9I5Y8|Q9I5Y8_PSEAE
tr|Q9I612|Q9I612_PSEAE
tr|Q9I659|Q9I659_PSEAE;sp|Q9HVN5|CLPB_PSEAE
tr|Q9I6H5|Q9I6H5_PSEAE
tr|Q9I6J2|Q9I6J2_PSEAE
tr|Q9I6Q7|Q9I6Q7_PSEAE

## Sheet: 6-1 Sheet2
Protein IDs-Probe 12 (subtracted)	Protein IDs-Probe 12 (full)			Fasta headers	Number of proteins	Peptides	Razor + unique peptides
REV__tr|Q9HXW2|Q9HXW2_PSEAE	REV__tr|Q9HXW2|Q9HXW2_PSEAE			>tr|Q9HXW2|Q9HXW2_PSEAE Probable transcriptional regulator OS=Pseudomonas aeruginosa (strain ATCC 15692 / PAO1 / 1C / PRS 101 / LMG 12228) GN=PA3678 PE=4 SV=1	1	1	1
sp|G3XD23|WBPB_PSEAE	sp|G3XD23|WBPB_PSEAE			>sp|G3XD23|WBPB_PSEAE UDP-N-acetyl-2-amino-2-deoxy-D-glucuronate oxidase OS=Pseudomonas aeruginosa (strain ATCC 15692 / PAO1 / 1C / PRS 101 / LMG 12228) GN=wbpB PE=1 SV=1	1	1	1
sp|O69753|PHZB1_PSEAE	sp|O52759|RS4_PSEAE			>sp|O52759|RS4_PSEAE 30S ribosomal protein S4 OS=Pseudomonas aeruginosa (strain ATCC 15692 / PAO1 / 1C / PRS 101 / LMG 12228) GN=rpsD PE=3 SV=2	1	2	2
sp|O69754|PHZF_PSEAE	sp|O52762|CATA_PSEAE			>sp|O52762|CATA_PSEAE Catalase OS=Pseudomonas aeruginosa (strain ATCC 15692 / PAO1 / 1C / PRS 101 / LMG 12228) GN=katA PE=1 SV=1	1	7	7
sp|O82850|RS2_PSEAE	sp|O68822|AMPA_PSEAE			>sp|O68822|AMPA_PSEAE Cytosol aminopeptidase OS=Pseudomonas aeruginosa (strain ATCC 15692 / PAO1 / 1C / PRS 101 / LMG 12228) GN=pepA PE=3 SV=1	1	10	10
sp|O82851|EFTS_PSEAE	sp|O69753|PHZB1_PSEAE			>sp|O69753|PHZB1_PSEAE Phenazine biosynthesis protein PhzB 1 OS=Pseudomonas aeruginosa (strain ATCC 15692 / PAO1 / 1C / PRS 101 / LMG 12228) GN=phzB1 PE=3 SV=1	1	4	4
sp|O86428|ILVE_PSEAE	sp|O69754|PHZF_PSEAE			>sp|O69754|PHZF_PSEAE Trans-2,3-dihydro-3-hydroxyanthranilate isomerase OS=Pseudomonas aeruginosa (strain ATCC 15692 / PAO1 / 1C / PRS 101 / LMG 12228) GN=phzF1 PE=3 SV=2	1	4	4
sp|P13982|ARCC_PSEAE	sp|O82850|RS2_PSEAE			>sp|O82850|RS2_PSEAE 30S ribosomal protein S2 OS=Pseudomonas aeruginosa (strain ATCC 15692 / PAO1 / 1C / PRS 101 / LMG 12228) GN=rpsB PE=3 SV=2	1	1	1
sp|P15276|ALGP_PSEAE	sp|O82851|EFTS_PSEAE			>sp|O82851|EFTS_PSEAE Elongation factor Ts OS=Pseudomonas aeruginosa (strain ATCC 15692 / PAO1 / 1C / PRS 101 / LMG 12228) GN=tsf PE=3 SV=1	1	1	1
sp|P28810|MMSA_PSEAE;tr|Q9I5I2|Q9I5I2_PSEAE	sp|O86428|ILVE_PSEAE			>sp|O86428|ILVE_PSEAE Branched-chain-amino-acid aminotransferase OS=Pseudomonas aeruginosa (strain ATCC 15692 / PAO1 / 1C / PRS 101 / LMG 12228) GN=ilvE PE=1 SV=2	1	3	3
sp|P37798|ACCC_PSEAE	sp|P04739|FMPO_PSEAE			>sp|P04739|FMPO_PSEAE Fimbrial protein OS=Pseudomonas aeruginosa (strain ATCC 15692 / PAO1 / 1C / PRS 101 / LMG 12228) GN=pilA PE=1 SV=1	1	2	2
sp|P38100|CARB_PSEAE	sp|P05384|DBHB_PSEAE			>sp|P05384|DBHB_PSEAE DNA-binding protein HU-beta OS=Pseudomonas aeruginosa (strain ATCC 15692 / PAO1 / 1C / PRS 101 / LMG 12228) GN=hupB PE=1 SV=3	1	2	2
sp|P40947|SSB_PSEAE	sp|P08308|OTCC_PSEAE			>sp|P08308|OTCC_PSEAE Ornithine carbamoyltransferase, catabolic OS=Pseudomonas aeruginosa (strain ATCC 15692 / PAO1 / 1C / PRS 101 / LMG 12228) GN=arcB PE=1 SV=3	1	7	7
sp|P57668|TPX_PSEAE	sp|P09591|EFTU_PSEAE			>sp|P09591|EFTU_PSEAE Elongation factor Tu OS=Pseudomonas aeruginosa (strain ATCC 15692 / PAO1 / 1C / PRS 101 / LMG 12228) GN=tufA PE=1 SV=2	1	13	13
sp|Q51342|PUR1_PSEAE	sp|P11221|OPRI_PSEAE			>sp|P11221|OPRI_PSEAE Major outer membrane lipoprotein OS=Pseudomonas aeruginosa (strain ATCC 15692 / PAO1 / 1C / PRS 101 / LMG 12228) GN=oprI PE=3 SV=1	1	2	2
sp|Q59636|NDK_PSEAE	sp|P11436|AMIE_PSEAE			>sp|P11436|AMIE_PSEAE Aliphatic amidase OS=Pseudomonas aeruginosa (strain ATCC 15692 / PAO1 / 1C / PRS 101 / LMG 12228) GN=amiE PE=1 SV=2	1	2	2
sp|Q9HT20|ATPB_PSEAE	sp|P13794|PORF_PSEAE			>sp|P13794|PORF_PSEAE Outer membrane porin F OS=Pseudomonas aeruginosa (strain ATCC 15692 / PAO1 / 1C / PRS 101 / LMG 12228) GN=oprF PE=1 SV=1	1	5	5
sp|Q9HTD7|ASPA_PSEAE	sp|P13981|ARCA_PSEAE			>sp|P13981|ARCA_PSEAE Arginine deiminase OS=Pseudomonas aeruginosa (strain ATCC 15692 / PAO1 / 1C / PRS 101 / LMG 12228) GN=arcA PE=1 SV=2	1	18	18
sp|Q9HU21|RMLC_PSEAE	sp|P13982|ARCC_PSEAE			>sp|P13982|ARCC_PSEAE Carbamate kinase OS=Pseudomonas aeruginosa (strain ATCC 15692 / PAO1 / 1C / PRS 101 / LMG 12228) GN=arcC PE=3 SV=1	1	2	2
sp|Q9HUM6|PURA_PSEAE	sp|P15276|ALGP_PSEAE			>sp|P15276|ALGP_PSEAE Transcriptional regulatory protein AlgP OS=Pseudomonas aeruginosa (strain ATCC 15692 / PAO1 / 1C / PRS 101 / LMG 12228) GN=algP PE=4 SV=2	1	1	1
sp|Q9HV59|PNP_PSEAE	sp|P28810|MMSA_PSEAE;tr|Q9I5I2|Q9I5I2_PSEAE			>sp|P28810|MMSA_PSEAE Methylmalonate-semialdehyde dehydrogenase [acylating] OS=Pseudomonas aeruginosa (strain ATCC 15692 / PAO1 / 1C / PRS 101 / LMG 12228) GN=mmsA PE=1 SV=2;>tr|Q9I5I2|Q9I5I2_PSEAE Probable aldehyde dehydrogenase OS=Pseudomonas aeruginosa	2	1	1
sp|Q9HV69|PANC_PSEAE	sp|P30718|CH60_PSEAE			>sp|P30718|CH60_PSEAE 60 kDa chaperonin OS=Pseudomonas aeruginosa (strain ATCC 15692 / PAO1 / 1C / PRS 101 / LMG 12228) GN=groL PE=1 SV=3	1	20	20
sp|Q9HWC8|RL7_PSEAE	sp|P37798|ACCC_PSEAE			>sp|P37798|ACCC_PSEAE Biotin carboxylase OS=Pseudomonas aeruginosa (strain ATCC 15692 / PAO1 / 1C / PRS 101 / LMG 12228) GN=accC PE=1 SV=1	1	2	2
sp|Q9HWD1|RS7_PSEAE	sp|P37799|BCCP_PSEAE			>sp|P37799|BCCP_PSEAE Biotin carboxyl carrier protein of acetyl-CoA carboxylase OS=Pseudomonas aeruginosa (strain ATCC 15692 / PAO1 / 1C / PRS 101 / LMG 12228) GN=accB PE=3 SV=1	1	8	8
sp|Q9HWD5|RL3_PSEAE	sp|P38100|CARB_PSEAE			>sp|P38100|CARB_PSEAE Carbamoyl-phosphate synthase large chain OS=Pseudomonas aeruginosa (strain ATCC 15692 / PAO1 / 1C / PRS 101 / LMG 12228) GN=carB PE=3 SV=3	1	1	1
sp|Q9HWE1|RS3_PSEAE	sp|P40947|SSB_PSEAE			>sp|P40947|SSB_PSEAE Single-stranded DNA-binding protein OS=Pseudomonas aeruginosa (strain ATCC 15692 / PAO1 / 1C / PRS 101 / LMG 12228) GN=ssb PE=1 SV=3	1	1	1
sp|Q9HWE5|RL14_PSEAE	sp|P43336|PHHC_PSEAE			>sp|P43336|PHHC_PSEAE Aromatic-amino-acid aminotransferase OS=Pseudomonas aeruginosa (strain ATCC 15692 / PAO1 / 1C / PRS 101 / LMG 12228) GN=phhC PE=3 SV=2	1	4	4
sp|Q9HWF2|RS5_PSEAE	sp|P47204|FTSZ_PSEAE			>sp|P47204|FTSZ_PSEAE Cell division protein FtsZ OS=Pseudomonas aeruginosa (strain ATCC 15692 / PAO1 / 1C / PRS 101 / LMG 12228) GN=ftsZ PE=1 SV=2	1	1	1
sp|Q9HYR9|CLPP2_PSEAE	sp|P53593|SUCC_PSEAE			>sp|P53593|SUCC_PSEAE Succinyl-CoA ligase [ADP-forming] subunit beta OS=Pseudomonas aeruginosa (strain ATCC 15692 / PAO1 / 1C / PRS 101 / LMG 12228) GN=sucC PE=3 SV=2	1	9	9
sp|Q9HZP6|ETFB_PSEAE	sp|P53641|SODF_PSEAE			>sp|P53641|SODF_PSEAE Superoxide dismutase [Fe] OS=Pseudomonas aeruginosa (strain ATCC 15692 / PAO1 / 1C / PRS 101 / LMG 12228) GN=sodB PE=3 SV=3	1	3	3
sp|Q9I1L9|DLDH1_PSEAE	sp|P57668|TPX_PSEAE			>sp|P57668|TPX_PSEAE Probable thiol peroxidase OS=Pseudomonas aeruginosa (strain ATCC 15692 / PAO1 / 1C / PRS 101 / LMG 12228) GN=tpx PE=3 SV=1	1	1	1
sp|Q9I1M0|ODB2_PSEAE	sp|P72173|AAT_PSEAE			>sp|P72173|AAT_PSEAE Aspartate aminotransferase OS=Pseudomonas aeruginosa (strain ATCC 15692 / PAO1 / 1C / PRS 101 / LMG 12228) GN=aspC PE=3 SV=2	1	1	1
sp|Q9I2U1|CLPP1_PSEAE	sp|Q51342|PUR1_PSEAE			>sp|Q51342|PUR1_PSEAE Amidophosphoribosyltransferase OS=Pseudomonas aeruginosa (strain ATCC 15692 / PAO1 / 1C / PRS 101 / LMG 12228) GN=purF PE=3 SV=3	1	1	1
sp|Q9I2W7|RRAAH_PSEAE	sp|Q51561|RPOB_PSEAE			>sp|Q51561|RPOB_PSEAE DNA-directed RNA polymerase subunit beta OS=Pseudomonas aeruginosa (strain ATCC 15692 / PAO1 / 1C / PRS 101 / LMG 12228) GN=rpoB PE=3 SV=2	1	4	4
sp|Q9I3C5|HTPG_PSEAE	sp|Q51567|SUCD_PSEAE			>sp|Q51567|SUCD_PSEAE Succinyl-CoA ligase [ADP-forming] subunit alpha OS=Pseudomonas aeruginosa (strain ATCC 15692 / PAO1 / 1C / PRS 101 / LMG 12228) GN=sucD PE=3 SV=2	1	4	4
sp|Q9I3D2|ODO2_PSEAE	sp|Q59636|NDK_PSEAE			>sp|Q59636|NDK_PSEAE Nucleoside diphosphate kinase OS=Pseudomonas aeruginosa (strain ATCC 15692 / PAO1 / 1C / PRS 101 / LMG 12228) GN=ndk PE=3 SV=2	1	1	1
sp|Q9I589|CBPD_PSEAE	sp|Q59637|ODP1_PSEAE			>sp|Q59637|ODP1_PSEAE Pyruvate dehydrogenase E1 component OS=Pseudomonas aeruginosa (strain ATCC 15692 / PAO1 / 1C / PRS 101 / LMG 12228) GN=aceE PE=3 SV=2	1	9	9
sp|Q9I6M4|DAVT_PSEAE	sp|Q9HT16|ATPF_PSEAE			>sp|Q9HT16|ATPF_PSEAE ATP synthase subunit b OS=Pseudomonas aeruginosa (strain ATCC 15692 / PAO1 / 1C / PRS 101 / LMG 12228) GN=atpF PE=3 SV=1	1	1	1
sp|Q9I747|HCP1_PSEAE	sp|Q9HT18|ATPA_PSEAE			>sp|Q9HT18|ATPA_PSEAE ATP synthase subunit alpha OS=Pseudomonas aeruginosa (strain ATCC 15692 / PAO1 / 1C / PRS 101 / LMG 12228) GN=atpA PE=3 SV=1	1	10	10
sp|Q9S508|PHZB2_PSEAE	sp|Q9HT20|ATPB_PSEAE			>sp|Q9HT20|ATPB_PSEAE ATP synthase subunit beta OS=Pseudomonas aeruginosa (strain ATCC 15692 / PAO1 / 1C / PRS 101 / LMG 12228) GN=atpD PE=3 SV=1	1	6	6
tr|Q9HTJ6|Q9HTJ6_PSEAE	sp|Q9HTD7|ASPA_PSEAE			>sp|Q9HTD7|ASPA_PSEAE Aspartate ammonia-lyase OS=Pseudomonas aeruginosa (strain ATCC 15692 / PAO1 / 1C / PRS 101 / LMG 12228) GN=aspA PE=3 SV=1	1	3	3
tr|Q9HUC3|Q9HUC3_PSEAE	sp|Q9HU21|RMLC_PSEAE			>sp|Q9HU21|RMLC_PSEAE dTDP-4-dehydrorhamnose 3,5-epimerase OS=Pseudomonas aeruginosa (strain ATCC 15692 / PAO1 / 1C / PRS 101 / LMG 12228) GN=rmlC PE=1 SV=1	1	1	1
tr|Q9HVS8|Q9HVS8_PSEAE	sp|Q9HU65|GLNA_PSEAE			>sp|Q9HU65|GLNA_PSEAE Glutamine synthetase OS=Pseudomonas aeruginosa (strain ATCC 15692 / PAO1 / 1C / PRS 101 / LMG 12228) GN=glnA PE=1 SV=1	1	2	2
tr|Q9HX05|Q9HX05_PSEAE;tr|Q9I2C4|Q9I2C4_PSEAE	sp|Q9HU83|HUTU_PSEAE			>sp|Q9HU83|HUTU_PSEAE Urocanate hydratase OS=Pseudomonas aeruginosa (strain ATCC 15692 / PAO1 / 1C / PRS 101 / LMG 12228) GN=hutU PE=1 SV=1	1	1	1
tr|Q9HXU8|Q9HXU8_PSEAE	sp|Q9HUM6|PURA_PSEAE			>sp|Q9HUM6|PURA_PSEAE Adenylosuccinate synthetase OS=Pseudomonas aeruginosa (strain ATCC 15692 / PAO1 / 1C / PRS 101 / LMG 12228) GN=purA PE=3 SV=1	1	1	1
tr|Q9HY79|Q9HY79_PSEAE	sp|Q9HV43|DNAK_PSEAE			>sp|Q9HV43|DNAK_PSEAE Chaperone protein DnaK OS=Pseudomonas aeruginosa (strain ATCC 15692 / PAO1 / 1C / PRS 101 / LMG 12228) GN=dnaK PE=3 SV=1	1	1	1
tr|Q9HYE7|Q9HYE7_PSEAE	sp|Q9HV59|PNP_PSEAE			>sp|Q9HV59|PNP_PSEAE Polyribonucleotide nucleotidyltransferase OS=Pseudomonas aeruginosa (strain ATCC 15692 / PAO1 / 1C / PRS 101 / LMG 12228) GN=pnp PE=3 SV=1	1	1	1
tr|Q9HYK2|Q9HYK2_PSEAE	sp|Q9HV69|PANC_PSEAE			>sp|Q9HV69|PANC_PSEAE Pantothenate synthetase OS=Pseudomonas aeruginosa (strain ATCC 15692 / PAO1 / 1C / PRS 101 / LMG 12228) GN=panC PE=3 SV=1	1	1	1
tr|Q9HZ60|Q9HZ60_PSEAE	sp|Q9HVA2|ILVC_PSEAE			>sp|Q9HVA2|ILVC_PSEAE Ketol-acid reductoisomerase OS=Pseudomonas aeruginosa (strain ATCC 15692 / PAO1 / 1C / PRS 101 / LMG 12228) GN=ilvC PE=1 SV=1	1	1	1
tr|Q9HZK4|Q9HZK4_PSEAE	sp|Q9HVY3|RS9_PSEAE			>sp|Q9HVY3|RS9_PSEAE 30S ribosomal protein S9 OS=Pseudomonas aeruginosa (strain ATCC 15692 / PAO1 / 1C / PRS 101 / LMG 12228) GN=rpsI PE=3 SV=1	1	1	1
tr|Q9I017|Q9I017_PSEAE	sp|Q9HWC8|RL7_PSEAE			>sp|Q9HWC8|RL7_PSEAE 50S ribosomal protein L7/L12 OS=Pseudomonas aeruginosa (strain ATCC 15692 / PAO1 / 1C / PRS 101 / LMG 12228) GN=rplL PE=3 SV=1	1	1	1
tr|Q9I028|Q9I028_PSEAE	sp|Q9HWC9|RPOC_PSEAE			>sp|Q9HWC9|RPOC_PSEAE DNA-directed RNA polymerase subunit beta OS=Pseudomonas aeruginosa (strain ATCC 15692 / PAO1 / 1C / PRS 101 / LMG 12228) GN=rpoC PE=3 SV=1	1	6	6
tr|Q9I056|Q9I056_PSEAE	sp|Q9HWD1|RS7_PSEAE			>sp|Q9HWD1|RS7_PSEAE 30S ribosomal protein S7 OS=Pseudomonas aeruginosa (strain ATCC 15692 / PAO1 / 1C / PRS 101 / LMG 12228) GN=rpsG PE=3 SV=1	1	2	2
tr|Q9I1E7|Q9I1E7_PSEAE	sp|Q9HWD2|EFG1_PSEAE;sp|Q9I244|EFG2_PSEAE			>sp|Q9HWD2|EFG1_PSEAE Elongation factor G 1 OS=Pseudomonas aeruginosa (strain ATCC 15692 / PAO1 / 1C / PRS 101 / LMG 12228) GN=fusA PE=1 SV=1	2	12	12
tr|Q9I1E8|Q9I1E8_PSEAE	sp|Q9HWD5|RL3_PSEAE			>sp|Q9HWD5|RL3_PSEAE 50S ribosomal protein L3 OS=Pseudomonas aeruginosa (strain ATCC 15692 / PAO1 / 1C / PRS 101 / LMG 12228) GN=rplC PE=3 SV=1	1	1	1
tr|Q9I1H5|Q9I1H5_PSEAE	sp|Q9HWD8|RL2_PSEAE			>sp|Q9HWD8|RL2_PSEAE 50S ribosomal protein L2 OS=Pseudomonas aeruginosa (strain ATCC 15692 / PAO1 / 1C / PRS 101 / LMG 12228) GN=rplB PE=3 SV=1	1	2	2
tr|Q9I2A2|Q9I2A2_PSEAE	sp|Q9HWE1|RS3_PSEAE			>sp|Q9HWE1|RS3_PSEAE 30S ribosomal protein S3 OS=Pseudomonas aeruginosa (strain ATCC 15692 / PAO1 / 1C / PRS 101 / LMG 12228) GN=rpsC PE=3 SV=1	1	1	1
tr|Q9I2A6|Q9I2A6_PSEAE	sp|Q9HWE5|RL14_PSEAE			>sp|Q9HWE5|RL14_PSEAE 50S ribosomal protein L14 OS=Pseudomonas aeruginosa (strain ATCC 15692 / PAO1 / 1C / PRS 101 / LMG 12228) GN=rplN PE=3 SV=1	1	1	1
tr|Q9I2A9|Q9I2A9_PSEAE	sp|Q9HWE8|RS14_PSEAE			>sp|Q9HWE8|RS14_PSEAE 30S ribosomal protein S14 OS=Pseudomonas aeruginosa (strain ATCC 15692 / PAO1 / 1C / PRS 101 / LMG 12228) GN=rpsN PE=3 SV=1	1	1	1
tr|Q9I2V3|Q9I2V3_PSEAE	sp|Q9HWF2|RS5_PSEAE			>sp|Q9HWF2|RS5_PSEAE 30S ribosomal protein S5 OS=Pseudomonas aeruginosa (strain ATCC 15692 / PAO1 / 1C / PRS 101 / LMG 12228) GN=rpsE PE=3 SV=1	1	2	2
tr|Q9I2W9|Q9I2W9_PSEAE	sp|Q9HXZ4|PYRG_PSEAE			>sp|Q9HXZ4|PYRG_PSEAE CTP synthase OS=Pseudomonas aeruginosa (strain ATCC 15692 / PAO1 / 1C / PRS 101 / LMG 12228) GN=pyrG PE=3 SV=1	1	1	1
tr|Q9I3B2|Q9I3B2_PSEAE	sp|Q9HYR9|CLPP2_PSEAE			>sp|Q9HYR9|CLPP2_PSEAE ATP-dependent Clp protease proteolytic subunit 2 OS=Pseudomonas aeruginosa (strain ATCC 15692 / PAO1 / 1C / PRS 101 / LMG 12228) GN=clpP2 PE=3 SV=1	1	1	1
tr|Q9I3G1|Q9I3G1_PSEAE	sp|Q9HZ71|RS1_PSEAE			>sp|Q9HZ71|RS1_PSEAE 30S ribosomal protein S1 OS=Pseudomonas aeruginosa (strain ATCC 15692 / PAO1 / 1C / PRS 101 / LMG 12228) GN=rpsA PE=3 SV=1	1	4	4
tr|Q9I3G6|Q9I3G6_PSEAE	sp|Q9HZE0|DHE2_PSEAE			>sp|Q9HZE0|DHE2_PSEAE NAD-specific glutamate dehydrogenase OS=Pseudomonas aeruginosa (strain ATCC 15692 / PAO1 / 1C / PRS 101 / LMG 12228) GN=gdhB PE=1 SV=1	1	17	17
tr|Q9I5E3|Q9I5E3_PSEAE	sp|Q9HZJ2|FADB_PSEAE			>sp|Q9HZJ2|FADB_PSEAE Fatty acid oxidation complex subunit alpha OS=Pseudomonas aeruginosa (strain ATCC 15692 / PAO1 / 1C / PRS 101 / LMG 12228) GN=fadB PE=3 SV=1	1	2	2
tr|Q9I5F6|Q9I5F6_PSEAE	sp|Q9HZP6|ETFB_PSEAE			>sp|Q9HZP6|ETFB_PSEAE Electron transfer flavoprotein subunit beta OS=Pseudomonas aeruginosa (strain ATCC 15692 / PAO1 / 1C / PRS 101 / LMG 12228) GN=etfB PE=3 SV=1	1	2	2
tr|Q9I5W1|Q9I5W1_PSEAE	sp|Q9I0K4|ACEA_PSEAE			>sp|Q9I0K4|ACEA_PSEAE Isocitrate lyase OS=Pseudomonas aeruginosa (strain ATCC 15692 / PAO1 / 1C / PRS 101 / LMG 12228) GN=PA2634 PE=1 SV=1	1	9	9
tr|Q9I5Y8|Q9I5Y8_PSEAE	sp|Q9I1L9|DLDH1_PSEAE			>sp|Q9I1L9|DLDH1_PSEAE Dihydrolipoyl dehydrogenase OS=Pseudomonas aeruginosa (strain ATCC 15692 / PAO1 / 1C / PRS 101 / LMG 12228) GN=lpdV PE=1 SV=1	1	1	1
tr|Q9I612|Q9I612_PSEAE	sp|Q9I1M0|ODB2_PSEAE			>sp|Q9I1M0|ODB2_PSEAE Lipoamide acyltransferase component of branched-chain alpha-keto acid dehydrogenase complex OS=Pseudomonas aeruginosa (strain ATCC 15692 / PAO1 / 1C / PRS 101 / LMG 12228) GN=bkdB PE=1 SV=1	1	1	1
tr|Q9I659|Q9I659_PSEAE;sp|Q9HVN5|CLPB_PSEAE	sp|Q9I2A8|ATOB_PSEAE			>sp|Q9I2A8|ATOB_PSEAE Acetyl-CoA acetyltransferase OS=Pseudomonas aeruginosa (strain ATCC 15692 / PAO1 / 1C / PRS 101 / LMG 12228) GN=atoB PE=3 SV=1	1	1	1
tr|Q9I6H5|Q9I6H5_PSEAE	sp|Q9I2U1|CLPP1_PSEAE			>sp|Q9I2U1|CLPP1_PSEAE ATP-dependent Clp protease proteolytic subunit 1 OS=Pseudomonas aeruginosa (strain ATCC 15692 / PAO1 / 1C / PRS 101 / LMG 12228) GN=clpP1 PE=3 SV=1	1	1	1
tr|Q9I6J2|Q9I6J2_PSEAE	sp|Q9I2V5|ACNB_PSEAE			>sp|Q9I2V5|ACNB_PSEAE Aconitate hydratase B OS=Pseudomonas aeruginosa (strain ATCC 15692 / PAO1 / 1C / PRS 101 / LMG 12228) GN=acnB PE=3 SV=1	1	8	8
tr|Q9I6Q7|Q9I6Q7_PSEAE	sp|Q9I2W7|RRAAH_PSEAE			>sp|Q9I2W7|RRAAH_PSEAE Putative 4-hydroxy-4-methyl-2-oxoglutarate aldolase OS=Pseudomonas aeruginosa (strain ATCC 15692 / PAO1 / 1C / PRS 101 / LMG 12228) GN=PA1772 PE=1 SV=1	1	1	1
	sp|Q9I3C5|HTPG_PSEAE			>sp|Q9I3C5|HTPG_PSEAE Chaperone protein HtpG OS=Pseudomonas aeruginosa (strain ATCC 15692 / PAO1 / 1C / PRS 101 / LMG 12228) GN=htpG PE=3 SV=1	1	1	1
	sp|Q9I3D1|DLDH2_PSEAE			>sp|Q9I3D1|DLDH2_PSEAE Dihydrolipoyl dehydrogenase OS=Pseudomonas aeruginosa (strain ATCC 15692 / PAO1 / 1C / PRS 101 / LMG 12228) GN=lpdG PE=3 SV=1	1	8	8
	sp|Q9I3D2|ODO2_PSEAE			>sp|Q9I3D2|ODO2_PSEAE Dihydrolipoyllysine-residue succinyltransferase component of 2-oxoglutarate dehydrogenase complex OS=Pseudomonas aeruginosa (strain ATCC 15692 / PAO1 / 1C / PRS 101 / LMG 12228) GN=sucB PE=3 SV=1	1	1	1
	sp|Q9I3F5|ACNA_PSEAE			>sp|Q9I3F5|ACNA_PSEAE Aconitate hydratase A OS=Pseudomonas aeruginosa (strain ATCC 15692 / PAO1 / 1C / PRS 101 / LMG 12228) GN=acnA PE=3 SV=1	1	9	9
	sp|Q9I576|HPPD_PSEAE			>sp|Q9I576|HPPD_PSEAE 4-hydroxyphenylpyruvate dioxygenase OS=Pseudomonas aeruginosa (strain ATCC 15692 / PAO1 / 1C / PRS 101 / LMG 12228) GN=hpd PE=3 SV=1	1	2	2
	sp|Q9I589|CBPD_PSEAE			>sp|Q9I589|CBPD_PSEAE Chitin-binding protein CbpD OS=Pseudomonas aeruginosa (strain ATCC 15692 / PAO1 / 1C / PRS 101 / LMG 12228) GN=cbpD PE=1 SV=1	1	1	1
	sp|Q9I685|SAHH_PSEAE			>sp|Q9I685|SAHH_PSEAE Adenosylhomocysteinase OS=Pseudomonas aeruginosa (strain ATCC 15692 / PAO1 / 1C / PRS 101 / LMG 12228) GN=ahcY PE=3 SV=1	1	10	10
	sp|Q9I6M4|DAVT_PSEAE			>sp|Q9I6M4|DAVT_PSEAE 5-aminovalerate aminotransferase DavT OS=Pseudomonas aeruginosa (strain ATCC 15692 / PAO1 / 1C / PRS 101 / LMG 12228) GN=davT PE=1 SV=1	1	1	1
	sp|Q9I6M5|DAVD_PSEAE			>sp|Q9I6M5|DAVD_PSEAE Glutarate-semialdehyde dehydrogenase DavD OS=Pseudomonas aeruginosa (strain ATCC 15692 / PAO1 / 1C / PRS 101 / LMG 12228) GN=davD PE=1 SV=1	1	2	2
	sp|Q9I747|HCP1_PSEAE			>sp|Q9I747|HCP1_PSEAE Protein hcp1 OS=Pseudomonas aeruginosa (strain ATCC 15692 / PAO1 / 1C / PRS 101 / LMG 12228) GN=hcp1 PE=1 SV=1	1	2	2
	sp|Q9S508|PHZB2_PSEAE			>sp|Q9S508|PHZB2_PSEAE Phenazine biosynthesis protein PhzB 2 OS=Pseudomonas aeruginosa (strain ATCC 15692 / PAO1 / 1C / PRS 101 / LMG 12228) GN=phzB2 PE=1 SV=1	1	4	1
	tr|Q9HTD1|Q9HTD1_PSEAE			>tr|Q9HTD1|Q9HTD1_PSEAE Probable transcarboxylase subunit OS=Pseudomonas aeruginosa (strain ATCC 15692 / PAO1 / 1C / PRS 101 / LMG 12228) GN=PA5435 PE=4 SV=1	1	33	33
	tr|Q9HTD9|Q9HTD9_PSEAE			>tr|Q9HTD9|Q9HTD9_PSEAE Alcohol dehydrogenase OS=Pseudomonas aeruginosa (strain ATCC 15692 / PAO1 / 1C / PRS 101 / LMG 12228) GN=adhA PE=1 SV=1	1	1	1
	tr|Q9HTJ6|Q9HTJ6_PSEAE			>tr|Q9HTJ6|Q9HTJ6_PSEAE Probable two-component response regulator OS=Pseudomonas aeruginosa (strain ATCC 15692 / PAO1 / 1C / PRS 101 / LMG 12228) GN=PA5364 PE=4 SV=1	1	1	1
	tr|Q9HTP2|Q9HTP2_PSEAE			>tr|Q9HTP2|Q9HTP2_PSEAE Probable aldehyde dehydrogenase OS=Pseudomonas aeruginosa (strain ATCC 15692 / PAO1 / 1C / PRS 101 / LMG 12228) GN=PA5312 PE=3 SV=1	1	4	4
	tr|Q9HUC3|Q9HUC3_PSEAE			>tr|Q9HUC3|Q9HUC3_PSEAE Polyhydroxyalkanoate synthesis protein PhaF OS=Pseudomonas aeruginosa (strain ATCC 15692 / PAO1 / 1C / PRS 101 / LMG 12228) GN=phaF PE=4 SV=1	1	1	1
	tr|Q9HUD3|Q9HUD3_PSEAE			>tr|Q9HUD3|Q9HUD3_PSEAE Malic enzyme OS=Pseudomonas aeruginosa (strain ATCC 15692 / PAO1 / 1C / PRS 101 / LMG 12228) GN=PA5046 PE=4 SV=1	1	2	2
	tr|Q9HVS8|Q9HVS8_PSEAE			>tr|Q9HVS8|Q9HVS8_PSEAE RoxR OS=Pseudomonas aeruginosa (strain ATCC 15692 / PAO1 / 1C / PRS 101 / LMG 12228) GN=roxR PE=4 SV=1	1	1	1
	tr|Q9HW49|Q9HW49_PSEAE			>tr|Q9HW49|Q9HW49_PSEAE Uncharacterized protein OS=Pseudomonas aeruginosa (strain ATCC 15692 / PAO1 / 1C / PRS 101 / LMG 12228) GN=PA4352 PE=3 SV=1	1	6	6
	tr|Q9HWV0|Q9HWV0_PSEAE			>tr|Q9HWV0|Q9HWV0_PSEAE Probable nonribosomal peptide synthetase OS=Pseudomonas aeruginosa (strain ATCC 15692 / PAO1 / 1C / PRS 101 / LMG 12228) GN=PA4078 PE=4 SV=1	1	4	4
	tr|Q9HX05|Q9HX05_PSEAE;tr|Q9I2C4|Q9I2C4_PSEAE			>tr|Q9HX05|Q9HX05_PSEAE Probable aldehyde dehydrogenase OS=Pseudomonas aeruginosa (strain ATCC 15692 / PAO1 / 1C / PRS 101 / LMG 12228) GN=PA4022 PE=3 SV=1;>tr|Q9I2C4|Q9I2C4_PSEAE NAD+ dependent aldehyde dehydrogenase ExaC OS=Pseudomonas aeruginosa (strain	2	2	2
	tr|Q9HXU8|Q9HXU8_PSEAE			>tr|Q9HXU8|Q9HXU8_PSEAE Lipotoxon F, LptF OS=Pseudomonas aeruginosa (strain ATCC 15692 / PAO1 / 1C / PRS 101 / LMG 12228) GN=lptF PE=3 SV=1	1	1	1
	tr|Q9HY13|Q9HY13_PSEAE			>tr|Q9HY13|Q9HY13_PSEAE Uncharacterized protein OS=Pseudomonas aeruginosa (strain ATCC 15692 / PAO1 / 1C / PRS 101 / LMG 12228) GN=PA3613 PE=4 SV=1	1	1	1
	tr|Q9HY79|Q9HY79_PSEAE			>tr|Q9HY79|Q9HY79_PSEAE Ferroxidase OS=Pseudomonas aeruginosa (strain ATCC 15692 / PAO1 / 1C / PRS 101 / LMG 12228) GN=bfrB PE=1 SV=1	1	1	1
	tr|Q9HY81|Q9HY81_PSEAE			>tr|Q9HY81|Q9HY81_PSEAE Probable peroxidase OS=Pseudomonas aeruginosa (strain ATCC 15692 / PAO1 / 1C / PRS 101 / LMG 12228) GN=PA3529 PE=1 SV=1	1	4	4
	tr|Q9HYE7|Q9HYE7_PSEAE			>tr|Q9HYE7|Q9HYE7_PSEAE Probable glutamine amidotransferase OS=Pseudomonas aeruginosa (strain ATCC 15692 / PAO1 / 1C / PRS 101 / LMG 12228) GN=PA3459 PE=4 SV=1	1	2	2
	tr|Q9HYK2|Q9HYK2_PSEAE			>tr|Q9HYK2|Q9HYK2_PSEAE Uncharacterized protein OS=Pseudomonas aeruginosa (strain ATCC 15692 / PAO1 / 1C / PRS 101 / LMG 12228) GN=PA3402 PE=4 SV=1	1	1	1
	tr|Q9HYT5|Q9HYT5_PSEAE			>tr|Q9HYT5|Q9HYT5_PSEAE Uncharacterized protein OS=Pseudomonas aeruginosa (strain ATCC 15692 / PAO1 / 1C / PRS 101 / LMG 12228) GN=PA3309 PE=3 SV=1	1	5	5
	tr|Q9HZ60|Q9HZ60_PSEAE			>tr|Q9HZ60|Q9HZ60_PSEAE Probable transcriptional regulator OS=Pseudomonas aeruginosa (strain ATCC 15692 / PAO1 / 1C / PRS 101 / LMG 12228) GN=PA3174 PE=4 SV=1	1	1	1
	tr|Q9HZK4|Q9HZK4_PSEAE			>tr|Q9HZK4|Q9HZK4_PSEAE Glyceraldehyde-3-phosphate dehydrogenase OS=Pseudomonas aeruginosa (strain ATCC 15692 / PAO1 / 1C / PRS 101 / LMG 12228) GN=PA3001 PE=3 SV=1	1	4	4
	tr|Q9I017|Q9I017_PSEAE			>tr|Q9I017|Q9I017_PSEAE Glutathione peroxidase OS=Pseudomonas aeruginosa (strain ATCC 15692 / PAO1 / 1C / PRS 101 / LMG 12228) GN=PA2826 PE=3 SV=1	1	1	1
	tr|Q9I028|Q9I028_PSEAE			>tr|Q9I028|Q9I028_PSEAE Probable acyl-CoA dehydrogenase OS=Pseudomonas aeruginosa (strain ATCC 15692 / PAO1 / 1C / PRS 101 / LMG 12228) GN=PA2815 PE=4 SV=1	1	5	5
	tr|Q9I056|Q9I056_PSEAE			>tr|Q9I056|Q9I056_PSEAE Carboxypeptidase G2 OS=Pseudomonas aeruginosa (strain ATCC 15692 / PAO1 / 1C / PRS 101 / LMG 12228) GN=cpg2 PE=4 SV=1	1	1	1
	tr|Q9I0L5|Q9I0L5_PSEAE			>tr|Q9I0L5|Q9I0L5_PSEAE Isocitrate dehydrogenase [NADP] OS=Pseudomonas aeruginosa (strain ATCC 15692 / PAO1 / 1C / PRS 101 / LMG 12228) GN=icd PE=3 SV=1	1	8	8
	tr|Q9I0T1|Q9I0T1_PSEAE			>tr|Q9I0T1|Q9I0T1_PSEAE Probable acyl-CoA thiolase OS=Pseudomonas aeruginosa (strain ATCC 15692 / PAO1 / 1C / PRS 101 / LMG 12228) GN=PA2553 PE=3 SV=1	1	4	4
	tr|Q9I1E7|Q9I1E7_PSEAE			>tr|Q9I1E7|Q9I1E7_PSEAE Alkyl hydroperoxide reductase AhpD OS=Pseudomonas aeruginosa (strain ATCC 15692 / PAO1 / 1C / PRS 101 / LMG 12228) GN=PA2331 PE=3 SV=1	1	2	2
	tr|Q9I1E8|Q9I1E8_PSEAE			>tr|Q9I1E8|Q9I1E8_PSEAE Uncharacterized protein OS=Pseudomonas aeruginosa (strain ATCC 15692 / PAO1 / 1C / PRS 101 / LMG 12228) GN=PA2330 PE=4 SV=1	1	1	1
	tr|Q9I1H5|Q9I1H5_PSEAE			>tr|Q9I1H5|Q9I1H5_PSEAE Chitinase OS=Pseudomonas aeruginosa (strain ATCC 15692 / PAO1 / 1C / PRS 101 / LMG 12228) GN=chiC PE=3 SV=1	1	2	2
	tr|Q9I246|Q9I246_PSEAE			>tr|Q9I246|Q9I246_PSEAE Probable carbamoyl transferase OS=Pseudomonas aeruginosa (strain ATCC 15692 / PAO1 / 1C / PRS 101 / LMG 12228) GN=PA2069 PE=4 SV=1	1	9	9
	tr|Q9I299|Q9I299_PSEAE			>tr|Q9I299|Q9I299_PSEAE Methylcrotonyl-CoA carboxylase, alpha-subunit (Biotin-containing) OS=Pseudomonas aeruginosa (strain ATCC 15692 / PAO1 / 1C / PRS 101 / LMG 12228) GN=liuD PE=1 SV=1	1	14	14
	tr|Q9I2A2|Q9I2A2_PSEAE			>tr|Q9I2A2|Q9I2A2_PSEAE Fumarylacetoacetase OS=Pseudomonas aeruginosa (strain ATCC 15692 / PAO1 / 1C / PRS 101 / LMG 12228) GN=fahA PE=4 SV=1	1	1	1
	tr|Q9I2A6|Q9I2A6_PSEAE			>tr|Q9I2A6|Q9I2A6_PSEAE 3-hydroxybutyrate dehydrogenase OS=Pseudomonas aeruginosa (strain ATCC 15692 / PAO1 / 1C / PRS 101 / LMG 12228) GN=bdhA PE=3 SV=1	1	1	1
	tr|Q9I2A9|Q9I2A9_PSEAE			>tr|Q9I2A9|Q9I2A9_PSEAE DhcB, dehydrocarnitine CoA transferase, subunit B OS=Pseudomonas aeruginosa (strain ATCC 15692 / PAO1 / 1C / PRS 101 / LMG 12228) GN=dhcB PE=4 SV=1	1	1	1
	tr|Q9I2V3|Q9I2V3_PSEAE			>tr|Q9I2V3|Q9I2V3_PSEAE Uncharacterized protein OS=Pseudomonas aeruginosa (strain ATCC 15692 / PAO1 / 1C / PRS 101 / LMG 12228) GN=PA1789 PE=1 SV=1	1	2	2
	tr|Q9I2W9|Q9I2W9_PSEAE			>tr|Q9I2W9|Q9I2W9_PSEAE Phosphoenolpyruvate synthase OS=Pseudomonas aeruginosa (strain ATCC 15692 / PAO1 / 1C / PRS 101 / LMG 12228) GN=ppsA PE=3 SV=1	1	2	2
	tr|Q9I3B2|Q9I3B2_PSEAE			>tr|Q9I3B2|Q9I3B2_PSEAE Beta-ketoacyl-ACP synthase I OS=Pseudomonas aeruginosa (strain ATCC 15692 / PAO1 / 1C / PRS 101 / LMG 12228) GN=fabB PE=3 SV=1	1	1	1
	tr|Q9I3D3|Q9I3D3_PSEAE			>tr|Q9I3D3|Q9I3D3_PSEAE 2-oxoglutarate dehydrogenase (E1 subunit) OS=Pseudomonas aeruginosa (strain ATCC 15692 / PAO1 / 1C / PRS 101 / LMG 12228) GN=sucA PE=4 SV=1	1	6	6
	tr|Q9I3D4|Q9I3D4_PSEAE			>tr|Q9I3D4|Q9I3D4_PSEAE Succinate dehydrogenase (B subunit) OS=Pseudomonas aeruginosa (strain ATCC 15692 / PAO1 / 1C / PRS 101 / LMG 12228) GN=sdhB PE=4 SV=1	1	3	3
	tr|Q9I3D5|Q9I3D5_PSEAE			>tr|Q9I3D5|Q9I3D5_PSEAE Succinate dehydrogenase flavoprotein subunit OS=Pseudomonas aeruginosa (strain ATCC 15692 / PAO1 / 1C / PRS 101 / LMG 12228) GN=sdhA PE=3 SV=1	1	5	5
	tr|Q9I3G1|Q9I3G1_PSEAE			>tr|Q9I3G1|Q9I3G1_PSEAE Cytochrome c oxidase, cbb3-type, CcoO subunit OS=Pseudomonas aeruginosa (strain ATCC 15692 / PAO1 / 1C / PRS 101 / LMG 12228) GN=ccoO2 PE=4 SV=1	1	1	1
	tr|Q9I3G6|Q9I3G6_PSEAE			>tr|Q9I3G6|Q9I3G6_PSEAE Probable ferredoxin OS=Pseudomonas aeruginosa (strain ATCC 15692 / PAO1 / 1C / PRS 101 / LMG 12228) GN=PA1551 PE=4 SV=1	1	1	1
	tr|Q9I5E3|Q9I5E3_PSEAE			>tr|Q9I5E3|Q9I5E3_PSEAE Citrate synthase OS=Pseudomonas aeruginosa (strain ATCC 15692 / PAO1 / 1C / PRS 101 / LMG 12228) GN=prpC PE=3 SV=1	1	2	2
	tr|Q9I5F6|Q9I5F6_PSEAE			>tr|Q9I5F6|Q9I5F6_PSEAE Bifunctional protein PutA OS=Pseudomonas aeruginosa (strain ATCC 15692 / PAO1 / 1C / PRS 101 / LMG 12228) GN=putA PE=3 SV=1	1	1	1
	tr|Q9I5U9|Q9I5U9_PSEAE			>tr|Q9I5U9|Q9I5U9_PSEAE Uncharacterized protein OS=Pseudomonas aeruginosa (strain ATCC 15692 / PAO1 / 1C / PRS 101 / LMG 12228) GN=PA0588 PE=4 SV=1	1	11	11
	tr|Q9I5W1|Q9I5W1_PSEAE			>tr|Q9I5W1|Q9I5W1_PSEAE Uncharacterized protein OS=Pseudomonas aeruginosa (strain ATCC 15692 / PAO1 / 1C / PRS 101 / LMG 12228) GN=PA0575 PE=4 SV=1	1	1	1
	tr|Q9I5Y8|Q9I5Y8_PSEAE			>tr|Q9I5Y8|Q9I5Y8_PSEAE Transketolase OS=Pseudomonas aeruginosa (strain ATCC 15692 / PAO1 / 1C / PRS 101 / LMG 12228) GN=tktA PE=1 SV=1	1	2	2
	tr|Q9I612|Q9I612_PSEAE			>tr|Q9I612|Q9I612_PSEAE Probable acyl-CoA dehydrogenase OS=Pseudomonas aeruginosa (strain ATCC 15692 / PAO1 / 1C / PRS 101 / LMG 12228) GN=PA0506 PE=3 SV=1	1	1	1
	tr|Q9I659|Q9I659_PSEAE;sp|Q9HVN5|CLPB_PSEAE			>tr|Q9I659|Q9I659_PSEAE Probable ClpA/B protease ATP binding subunit OS=Pseudomonas aeruginosa (strain ATCC 15692 / PAO1 / 1C / PRS 101 / LMG 12228) GN=PA0459 PE=4 SV=1	2	5	5
	tr|Q9I671|Q9I671_PSEAE			>tr|Q9I671|Q9I671_PSEAE Glutaryl-CoA dehydrogenase OS=Pseudomonas aeruginosa (strain ATCC 15692 / PAO1 / 1C / PRS 101 / LMG 12228) GN=gcdH PE=3 SV=1	1	1	1
	tr|Q9I6H5|Q9I6H5_PSEAE			>tr|Q9I6H5|Q9I6H5_PSEAE D-3-phosphoglycerate dehydrogenase OS=Pseudomonas aeruginosa (strain ATCC 15692 / PAO1 / 1C / PRS 101 / LMG 12228) GN=serA PE=3 SV=1	1	1	1
	tr|Q9I6J2|Q9I6J2_PSEAE			>tr|Q9I6J2|Q9I6J2_PSEAE Putrescine aminotransferase OS=Pseudomonas aeruginosa (strain ATCC 15692 / PAO1 / 1C / PRS 101 / LMG 12228) GN=spuC PE=3 SV=1	1	2	2
	tr|Q9I6Q7|Q9I6Q7_PSEAE			>tr|Q9I6Q7|Q9I6Q7_PSEAE Beta-ketoadipate enol-lactone hydrolase OS=Pseudomonas aeruginosa (strain ATCC 15692 / PAO1 / 1C / PRS 101 / LMG 12228) GN=pcaD PE=4 SV=1	1	1	1
	tr|Q9I6Z3|Q9I6Z3_PSEAE			>tr|Q9I6Z3|Q9I6Z3_PSEAE Alkyl hydroperoxide reductase subunit C OS=Pseudomonas aeruginosa (strain ATCC 15692 / PAO1 / 1C / PRS 101 / LMG 12228) GN=ahpC PE=4 SV=1	1	7	7

## Sheet: 6-2 proteinGroups C4HSL-1
Protein IDs	Majority protein IDs	Peptide counts (all)	Peptide counts (razor+unique)	Peptide counts (unique)	Fasta headers	Number of proteins	Peptides	Razor + unique peptides	Unique peptides	Sequence coverage [%]	Unique + razor sequence coverage [%]	Unique sequence coverage [%]	Mol. weight [kDa]	Sequence length	Sequence lengths	Q-value	Score	Intensity	MS/MS Count	Only identified by site	Reverse	Potential contaminant	id	Peptide IDs	Peptide is razor	Mod. peptide IDs	Evidence IDs	MS/MS IDs	Best MS/MS	Oxidation (M) site IDs	Oxidation (M) site positions
CON__P00761	CON__P00761	4	4	4	>P00761 SWISS-PROT:P00761|TRYP_PIG Trypsin - Sus scrofa (Pig).	1	4	4	4	25.1	25.1	25.1	24.409	231	231	0	70.891	786470000	76			+	0	112;141;162;233	True;True;True;True	118;119;148;169;244	191;192;193;194;195;269;270;271;272;321;322;490;491	393;394;395;396;397;398;399;400;401;618;619;620;621;622;623;624;625;626;627;628;629;630;631;632;633;634;635;636;637;638;639;640;641;642;643;644;768;769;770;771;772;773;774;775;776;1281;1282;1283;1284;1285;1286;1287;1288;1289;1290;1291;1292;1293;1294;1295;1296;1297;1298;1299;1300;1301;1302;1303;1304;1305;1306;1307;1308;1309;1310;1311	399;628;774;1283	0	94
CON__P02535-1;CON__P13645	CON__P02535-1;CON__P13645	1;1	1;1	1;1	>P02535-1 SWISS-PROT:P02535-1 Tax_Id=10090 Gene_Symbol=Krt10 Isoform 1 of Keratin, type I cytoskeletal 10;>P13645 SWISS-PROT:P13645 Tax_Id=9606 Gene_Symbol=KRT10 Keratin, type I cytoskeletal 10	2	1	1	1	1.6	1.6	1.6	57.769	570	570;593	0	9.4101	2722700	4			+	1	138	TRUE	145	264;265	611;612;613;614	612
CON__P04264;CON__ENSEMBL:ENSBTAP00000038253;CON__P35908;CON__Q9R0H5;CON__Q6NXH9;CON__Q8BGZ7;CON__P50446;CON__Q6IFZ6;CON__Q7Z794;CON__Q922U2;CON__Q5XQN5	CON__P04264	5;2;2;1;1;1;1;1;1;1;1	5;2;2;1;1;1;1;1;1;1;1	5;2;2;1;1;1;1;1;1;1;1	>P04264 SWISS-PROT:P04264 Tax_Id=9606 Gene_Symbol=KRT1 Keratin, type II cytoskeletal 1	11	5	5	5	8.4	8.4	8.4	66.017	644	644;606;645;524;539;551;553;572;578;580;601	0	62.977	33798000	17			+	2	70;106;205;207;267	True;True;True;True;True	74;111;215;217;279	121;122;178;179;433;434;436;437;565;566	251;252;253;254;255;256;257;370;371;1067;1068;1069;1070;1072;1073;1550;1551	254;370;1068;1073;1550
CON__P07477	CON__P07477	1	1	1	>P07477 SWISS-PROT:P07477 Tax_Id=9606 Gene_Symbol=PRSS1 Trypsin-1 precursor	1	1	1	1	8.1	8.1	8.1	26.558	247	247	0	5.7974	25589000	4			+	3	142	TRUE	149	273;274	645;646;647;648	645
CON__Streptavidin	CON__Streptavidin	4	4	4	>Streptavidin (S.avidinii)	1	4	4	4	43.1	43.1	43.1	16.622	160	160	0	140.07	2554100000	459			+	4	118;178;211;266	True;True;True;True	125;187;222;278	204;205;206;207;208;209;210;211;212;213;214;215;216;217;218;219;220;221;222;223;224;225;226;227;228;229;230;354;355;356;357;358;359;360;361;362;363;364;365;366;367;368;369;370;371;372;373;374;375;376;377;378;379;380;381;382;445;446;447;448;449;544;545;546;547;548;549;550;551;552;553;554;555;556;557;558;559;560;561;562;563;564	414;415;416;417;418;419;420;421;422;423;424;425;426;427;428;429;430;431;432;433;434;435;436;437;438;439;440;441;442;443;444;445;446;447;448;449;450;451;452;453;454;455;456;457;458;459;460;461;462;463;464;465;466;467;468;469;470;471;472;473;474;475;476;477;478;479;480;481;482;483;484;485;486;487;488;489;490;491;492;493;494;495;496;497;498;499;500;501;502;503;504;505;506;507;508;509;510;511;512;513…	508;868;1139;1483
sp|O52759|RS4_PSEAE	sp|O52759|RS4_PSEAE	2	2	2	>sp|O52759|RS4_PSEAE 30S ribosomal protein S4 OS=Pseudomonas aeruginosa (strain ATCC 15692 / PAO1 / 1C / PRS 101 / LMG 12228) GN=rpsD PE=3 SV=2	1	2	2	2	12.6	12.6	12.6	23.277	206	206	0	20.446	3218600	4				5	13;161	True;True	14;168	23;319;320	77;78;766;767	78;766
sp|O52762|CATA_PSEAE	sp|O52762|CATA_PSEAE	2	2	2	>sp|O52762|CATA_PSEAE Catalase OS=Pseudomonas aeruginosa (strain ATCC 15692 / PAO1 / 1C / PRS 101 / LMG 12228) GN=katA PE=1 SV=1	1	2	2	2	6.4	6.4	6.4	55.588	482	482	0	23.413	3779600	3				6	139;163	True;True	146;170	266;267;323	615;616;777	615;777
sp|O68822|AMPA_PSEAE	sp|O68822|AMPA_PSEAE	10	10	10	>sp|O68822|AMPA_PSEAE Cytosol aminopeptidase OS=Pseudomonas aeruginosa (strain ATCC 15692 / PAO1 / 1C / PRS 101 / LMG 12228) GN=pepA PE=3 SV=1	1	10	10	10	25.1	25.1	25.1	52.331	495	495	0	88.133	55222000	29				7	37;38;59;74;86;136;148;152;218;238	True;True;True;True;True;True;True;True;True;True	39;40;63;78;90;143;155;159;229;249	59;60;61;62;104;127;128;147;148;260;261;302;303;307;463;464;496;497	142;143;144;145;146;147;148;224;262;263;295;296;607;608;735;736;737;738;739;743;744;745;746;747;1229;1230;1231;1317;1318	143;148;224;262;296;608;737;743;1229;1318
sp|Q9S508|PHZB2_PSEAE;sp|O69753|PHZB1_PSEAE	sp|Q9S508|PHZB2_PSEAE;sp|O69753|PHZB1_PSEAE	1;1	1;1	1;1	>sp|Q9S508|PHZB2_PSEAE Phenazine biosynthesis protein PhzB 2 OS=Pseudomonas aeruginosa (strain ATCC 15692 / PAO1 / 1C / PRS 101 / LMG 12228) GN=phzB2 PE=1 SV=1;>sp|O69753|PHZB1_PSEAE Phenazine biosynthesis protein PhzB 1 OS=Pseudomonas aeruginosa (strain A	2	1	1	1	6.2	6.2	6.2	19.027	162	162;162	0	6.6847	2660100	2				8	23	TRUE	24	35;36	99;100	100
sp|P04739|FMPO_PSEAE	sp|P04739|FMPO_PSEAE	1	1	1	>sp|P04739|FMPO_PSEAE Fimbrial protein OS=Pseudomonas aeruginosa (strain ATCC 15692 / PAO1 / 1C / PRS 101 / LMG 12228) GN=pilA PE=1 SV=1	1	1	1	1	9.4	9.4	9.4	15.512	149	149	0	9.3104	3618600	3				9	198	TRUE	208	422;423	1052;1053;1054	1053
sp|P05384|DBHB_PSEAE	sp|P05384|DBHB_PSEAE	2	2	2	>sp|P05384|DBHB_PSEAE DNA-binding protein HU-beta OS=Pseudomonas aeruginosa (strain ATCC 15692 / PAO1 / 1C / PRS 101 / LMG 12228) GN=hupB PE=1 SV=3	1	2	2	2	32.2	32.2	32.2	9.0865	90	90	0	17.873	8111400	6				10	15;199	True;True	16;209	25;26;424	80;81;82;83;84;1055	80;1055
sp|P08308|OTCC_PSEAE	sp|P08308|OTCC_PSEAE	4	4	4	>sp|P08308|OTCC_PSEAE Ornithine carbamoyltransferase, catabolic OS=Pseudomonas aeruginosa (strain ATCC 15692 / PAO1 / 1C / PRS 101 / LMG 12228) GN=arcB PE=1 SV=3	1	4	4	4	19.6	19.6	19.6	38.108	336	336	0	24.253	10068000	9				11	68;101;177;183	True;True;True;True	72;106;186;192	118;119;171;352;353;390;391	246;247;248;249;359;839;840;987;988	247;359;840;987
sp|P09591|EFTU_PSEAE	sp|P09591|EFTU_PSEAE	12	12	12	>sp|P09591|EFTU_PSEAE Elongation factor Tu OS=Pseudomonas aeruginosa (strain ATCC 15692 / PAO1 / 1C / PRS 101 / LMG 12228) GN=tufA PE=1 SV=2	1	12	12	12	39.3	39.3	39.3	43.369	397	397	0	135.98	214920000	98				12	8;12;45;50;51;85;96;164;176;194;228;250	True;True;True;True;True;True;True;True;True;True;True;True	8;12;13;47;52;53;54;89;101;171;184;185;203;239;261	13;14;19;20;21;22;74;75;82;83;84;85;86;143;144;145;146;165;166;324;325;346;347;348;349;350;351;410;411;482;483;516;517	41;42;43;44;45;46;47;48;49;50;51;52;63;64;65;66;67;68;69;70;71;72;73;74;75;76;166;167;179;180;181;182;183;184;185;186;187;188;189;283;284;285;286;287;288;289;290;291;292;293;294;347;348;349;350;351;352;353;354;778;779;780;781;782;820;821;822;823;824;825;826;827;828;829;830;831;832;833;834;835;836;837;838;1020;1021;1022;1023;1271;1272;1350;1351;1352;1353;1354;1355;1356;1357;1358	42;63;166;180;189;294;348;781;837;1020;1271;1355	1;2;3	177;216;362
sp|P13794|PORF_PSEAE	sp|P13794|PORF_PSEAE	3	3	3	>sp|P13794|PORF_PSEAE Outer membrane porin F OS=Pseudomonas aeruginosa (strain ATCC 15692 / PAO1 / 1C / PRS 101 / LMG 12228) GN=oprF PE=1 SV=1	1	3	3	3	12.6	12.6	12.6	37.639	350	350	0	28.315	11809000	10				13	54;234;244	True;True;True	58;245;255	93;94;492;506;507	202;203;204;205;1312;1330;1331;1332;1333;1334	203;1312;1333
sp|P13981|ARCA_PSEAE	sp|P13981|ARCA_PSEAE	16	16	16	>sp|P13981|ARCA_PSEAE Arginine deiminase OS=Pseudomonas aeruginosa (strain ATCC 15692 / PAO1 / 1C / PRS 101 / LMG 12228) GN=arcA PE=1 SV=2	1	16	16	16	51.2	51.2	51.2	46.435	418	418	0	152.1	112910000	64				14	10;49;52;64;67;83;121;127;128;185;188;190;214;221;240;261	True;True;True;True;True;True;True;True;True;True;True;True;True;True;True;True	10;51;55;68;71;87;128;134;135;194;197;199;225;232;251;273	17;80;81;87;88;110;111;116;117;140;141;233;234;241;242;243;394;395;399;400;405;453;454;471;472;473;474;500;537;538	60;175;176;177;178;190;191;192;193;231;232;233;234;235;240;241;242;243;244;245;277;278;279;280;281;559;560;569;570;571;572;573;992;993;994;995;999;1000;1001;1015;1183;1184;1244;1245;1246;1247;1248;1249;1250;1251;1252;1253;1254;1255;1256;1257;1258;1259;1260;1321;1415;1416;1417;1418	60;177;193;233;243;278;559;570;572;993;1000;1015;1183;1245;1321;1415
sp|P30718|CH60_PSEAE	sp|P30718|CH60_PSEAE	9	9	9	>sp|P30718|CH60_PSEAE 60 kDa chaperonin OS=Pseudomonas aeruginosa (strain ATCC 15692 / PAO1 / 1C / PRS 101 / LMG 12228) GN=groL PE=1 SV=3	1	9	9	9	28.9	28.9	28.9	57.085	547	547	0	74.46	27511000	23				15	2;9;20;21;27;28;174;200;236	True;True;True;True;True;True;True;True;True	2;9;21;22;29;30;182;210;247	4;5;15;16;32;33;45;46;47;342;343;425;494	16;17;18;19;20;21;53;54;55;56;57;58;59;96;97;118;119;120;121;816;817;1056;1314	17;53;96;97;118;120;817;1056;1314
sp|P37799|BCCP_PSEAE	sp|P37799|BCCP_PSEAE	8	8	8	>sp|P37799|BCCP_PSEAE Biotin carboxyl carrier protein of acetyl-CoA carboxylase OS=Pseudomonas aeruginosa (strain ATCC 15692 / PAO1 / 1C / PRS 101 / LMG 12228) GN=accB PE=3 SV=1	1	8	8	8	58.3	58.3	58.3	16.455	156	156	0	126.24	984870000	203				16	0;1;129;130;146;147;209;215	True;True;True;True;True;True;True;True	0;1;136;137;153;154;219;220;226	0;1;2;3;244;245;246;247;248;249;250;251;252;280;281;282;283;284;285;286;287;288;289;290;291;292;293;294;295;296;297;298;299;300;301;439;440;441;442;455;456;457;458;459;460	0;1;2;3;4;5;6;7;8;9;10;11;12;13;14;15;574;575;576;577;578;579;580;581;582;583;584;585;586;587;588;589;590;591;592;593;594;595;596;597;598;659;660;661;662;663;664;665;666;667;668;669;670;671;672;673;674;675;676;677;678;679;680;681;682;683;684;685;686;687;688;689;690;691;692;693;694;695;696;697;698;699;700;701;702;703;704;705;706;707;708;709;710;711;712;713;714;715;716;717;718;719;720;721;722;723;7…	2;13;589;594;703;723;1097;1213	4	87
sp|P43336|PHHC_PSEAE	sp|P43336|PHHC_PSEAE	3	3	3	>sp|P43336|PHHC_PSEAE Aromatic-amino-acid aminotransferase OS=Pseudomonas aeruginosa (strain ATCC 15692 / PAO1 / 1C / PRS 101 / LMG 12228) GN=phhC PE=3 SV=2	1	3	3	3	11.5	11.5	11.5	43.273	399	399	0	23.968	6117700	7				17	108;132;249	True;True;True	114;139;260	184;255;256;515	384;385;601;602;603;1348;1349	385;601;1348
sp|P47204|FTSZ_PSEAE	sp|P47204|FTSZ_PSEAE	1	1	1	>sp|P47204|FTSZ_PSEAE Cell division protein FtsZ OS=Pseudomonas aeruginosa (strain ATCC 15692 / PAO1 / 1C / PRS 101 / LMG 12228) GN=ftsZ PE=1 SV=2	1	1	1	1	4.8	4.8	4.8	41.218	394	394	0	5.7181	0	1				18	259	TRUE	271	534	1410	1410
sp|P53593|SUCC_PSEAE	sp|P53593|SUCC_PSEAE	8	8	8	>sp|P53593|SUCC_PSEAE Succinyl-CoA ligase [ADP-forming] subunit beta OS=Pseudomonas aeruginosa (strain ATCC 15692 / PAO1 / 1C / PRS 101 / LMG 12228) GN=sucC PE=3 SV=2	1	8	8	8	28.6	28.6	28.6	41.542	388	388	0	96.041	23877000	19				19	6;35;40;117;182;186;191;241	True;True;True;True;True;True;True;True	6;37;42;124;191;195;200;252	11;56;57;65;202;203;388;389;396;406;501;502;503	39;135;136;137;138;139;140;153;411;412;413;985;986;996;1016;1322;1323;1324;1325;1326	39;138;153;411;985;996;1016;1322
sp|P53641|SODF_PSEAE	sp|P53641|SODF_PSEAE	1	1	1	>sp|P53641|SODF_PSEAE Superoxide dismutase [Fe] OS=Pseudomonas aeruginosa (strain ATCC 15692 / PAO1 / 1C / PRS 101 / LMG 12228) GN=sodB PE=3 SV=3	1	1	1	1	5.7	5.7	5.7	21.351	193	193	0	6.2956	2199500	1				20	7	TRUE	7	12	40	40
sp|Q51561|RPOB_PSEAE	sp|Q51561|RPOB_PSEAE	4	4	4	>sp|Q51561|RPOB_PSEAE DNA-directed RNA polymerase subunit beta OS=Pseudomonas aeruginosa (strain ATCC 15692 / PAO1 / 1C / PRS 101 / LMG 12228) GN=rpoB PE=3 SV=2	1	4	4	4	4.7	4.7	4.7	150.84	1357	1357	0	29.048	2894800	7				21	11;18;77;81	True;True;True;True	11;19;81;85	18;30;132;137	61;62;91;92;93;268;274	61;91;268;274
sp|Q52463|ALG8_PSEAE	sp|Q52463|ALG8_PSEAE	1	1	1	>sp|Q52463|ALG8_PSEAE Mannuronan synthase OS=Pseudomonas aeruginosa (strain ATCC 15692 / PAO1 / 1C / PRS 101 / LMG 12228) GN=alg8 PE=1 SV=2	1	1	1	1	3.8	3.8	3.8	56.456	494	494	0	5.9486	1351200	2				22	192	TRUE	201	407;408	1017;1018	1018	5	93
sp|Q59637|ODP1_PSEAE	sp|Q59637|ODP1_PSEAE	4	4	4	>sp|Q59637|ODP1_PSEAE Pyruvate dehydrogenase E1 component OS=Pseudomonas aeruginosa (strain ATCC 15692 / PAO1 / 1C / PRS 101 / LMG 12228) GN=aceE PE=3 SV=2	1	4	4	4	5	5	5	99.563	882	882	0	26.145	1715100	4				23	63;120;124;203	True;True;True;True	67;127;131;213	109;232;238;430	230;558;566;1063;1064	230;558;566;1063
sp|Q9HT18|ATPA_PSEAE	sp|Q9HT18|ATPA_PSEAE	7	7	7	>sp|Q9HT18|ATPA_PSEAE ATP synthase subunit alpha OS=Pseudomonas aeruginosa (strain ATCC 15692 / PAO1 / 1C / PRS 101 / LMG 12228) GN=atpA PE=3 SV=1	1	7	7	7	17.1	17.1	17.1	55.393	514	514	0	54.957	8585200	8				24	79;113;180;212;213;216;258	True;True;True;True;True;True;True	83;120;189;223;224;227;270	135;196;385;450;451;452;461;533	271;402;403;981;1180;1181;1182;1226;1409	271;402;981;1180;1182;1226;1409
sp|Q9HT20|ATPB_PSEAE	sp|Q9HT20|ATPB_PSEAE	1	1	1	>sp|Q9HT20|ATPB_PSEAE ATP synthase subunit beta OS=Pseudomonas aeruginosa (strain ATCC 15692 / PAO1 / 1C / PRS 101 / LMG 12228) GN=atpD PE=3 SV=1	1	1	1	1	2.4	2.4	2.4	49.499	458	458	0	6.2011	484750	1				25	232	TRUE	243	489	1280	1280
sp|Q9HTN8|RL28_PSEAE	sp|Q9HTN8|RL28_PSEAE	1	1	1	>sp|Q9HTN8|RL28_PSEAE 50S ribosomal protein L28 OS=Pseudomonas aeruginosa (strain ATCC 15692 / PAO1 / 1C / PRS 101 / LMG 12228) GN=rpmB PE=3 SV=1	1	1	1	1	12.8	12.8	12.8	9.0655	78	78	0	6.6872	0	1				26	84	TRUE	88	142	282	282
sp|Q9HU65|GLNA_PSEAE	sp|Q9HU65|GLNA_PSEAE	2	2	2	>sp|Q9HU65|GLNA_PSEAE Glutamine synthetase OS=Pseudomonas aeruginosa (strain ATCC 15692 / PAO1 / 1C / PRS 101 / LMG 12228) GN=glnA PE=1 SV=1	1	2	2	2	8.5	8.5	8.5	51.944	469	469	0	24.251	2000300	4				27	165;184	True;True	172;193	326;392;393	783;989;990;991	783;989
sp|Q9HVA2|ILVC_PSEAE	sp|Q9HVA2|ILVC_PSEAE	1	1	1	>sp|Q9HVA2|ILVC_PSEAE Ketol-acid reductoisomerase OS=Pseudomonas aeruginosa (strain ATCC 15692 / PAO1 / 1C / PRS 101 / LMG 12228) GN=ilvC PE=1 SV=1	1	1	1	1	5.6	5.6	5.6	36.424	338	338	0	9.8157	585530	2				28	80	TRUE	84	136	272;273	272
sp|Q9HVY3|RS9_PSEAE	sp|Q9HVY3|RS9_PSEAE	1	1	1	>sp|Q9HVY3|RS9_PSEAE 30S ribosomal protein S9 OS=Pseudomonas aeruginosa (strain ATCC 15692 / PAO1 / 1C / PRS 101 / LMG 12228) GN=rpsI PE=3 SV=1	1	1	1	1	7.7	7.7	7.7	14.615	130	130	0	6.9152	638880	2				29	19	TRUE	20	31	94;95	95
sp|Q9HWC9|RPOC_PSEAE	sp|Q9HWC9|RPOC_PSEAE	2	2	2	>sp|Q9HWC9|RPOC_PSEAE DNA-directed RNA polymerase subunit beta OS=Pseudomonas aeruginosa (strain ATCC 15692 / PAO1 / 1C / PRS 101 / LMG 12228) GN=rpoC PE=3 SV=1	1	2	2	2	1.4	1.4	1.4	154.38	1399	1399	0	11.458	101880	3				30	111;159	True;True	117;166	189;190;317	391;392;764	391;764
sp|Q9HWD2|EFG1_PSEAE;sp|Q9I244|EFG2_PSEAE	sp|Q9HWD2|EFG1_PSEAE;sp|Q9I244|EFG2_PSEAE	3;2	3;2	3;2	>sp|Q9HWD2|EFG1_PSEAE Elongation factor G 1 OS=Pseudomonas aeruginosa (strain ATCC 15692 / PAO1 / 1C / PRS 101 / LMG 12228) GN=fusA PE=1 SV=1;>sp|Q9I244|EFG2_PSEAE Elongation factor G 2 OS=Pseudomonas aeruginosa (strain ATCC 15692 / PAO1 / 1C / PRS 101 / L	2	3	3	3	5.9	5.9	5.9	77.784	706	706;702	0	35.367	2899000	4				31	5;135;263	True;True;True	5;142;275	10;259;540;541	38;606;1421;1422	38;606;1422
sp|Q9HWD5|RL3_PSEAE	sp|Q9HWD5|RL3_PSEAE	1	1	1	>sp|Q9HWD5|RL3_PSEAE 50S ribosomal protein L3 OS=Pseudomonas aeruginosa (strain ATCC 15692 / PAO1 / 1C / PRS 101 / LMG 12228) GN=rplC PE=3 SV=1	1	1	1	1	4.7	4.7	4.7	22.591	211	211	0	5.9371	610340	1				32	257	TRUE	269	532	1408	1408
sp|Q9HWD8|RL2_PSEAE	sp|Q9HWD8|RL2_PSEAE	2	2	2	>sp|Q9HWD8|RL2_PSEAE 50S ribosomal protein L2 OS=Pseudomonas aeruginosa (strain ATCC 15692 / PAO1 / 1C / PRS 101 / LMG 12228) GN=rplB PE=3 SV=1	1	2	2	2	11.4	11.4	11.4	29.579	273	273	0	15.445	1835100	3				33	36;94	True;True	38;99	58;163	141;344;345	141;345
sp|Q9HWE2|RL16_PSEAE	sp|Q9HWE2|RL16_PSEAE	2	2	2	>sp|Q9HWE2|RL16_PSEAE 50S ribosomal protein L16 OS=Pseudomonas aeruginosa (strain ATCC 15692 / PAO1 / 1C / PRS 101 / LMG 12228) GN=rplP PE=3 SV=1	1	2	2	2	13.1	13.1	13.1	15.401	137	137	0	11.017	3431700	3				34	158;254	True;True	165;266	316;528;529	763;1404;1405	763;1405
sp|Q9HZ71|RS1_PSEAE	sp|Q9HZ71|RS1_PSEAE	1	1	1	>sp|Q9HZ71|RS1_PSEAE 30S ribosomal protein S1 OS=Pseudomonas aeruginosa (strain ATCC 15692 / PAO1 / 1C / PRS 101 / LMG 12228) GN=rpsA PE=3 SV=1	1	1	1	1	2.5	2.5	2.5	61.869	559	559	0	6.9701	603520	1				35	58	TRUE	62	103	223	223
sp|Q9HZE0|DHE2_PSEAE	sp|Q9HZE0|DHE2_PSEAE	11	11	11	>sp|Q9HZE0|DHE2_PSEAE NAD-specific glutamate dehydrogenase OS=Pseudomonas aeruginosa (strain ATCC 15692 / PAO1 / 1C / PRS 101 / LMG 12228) GN=gdhB PE=1 SV=1	1	11	11	11	9.3	9.3	9.3	182.64	1620	1620	0	89.993	15535000	18				36	14;16;31;44;134;143;155;208;243;255;274	True;True;True;True;True;True;True;True;True;True;True	15;17;33;46;141;150;162;218;254;267;286	24;27;51;71;72;73;258;275;311;312;438;505;530;577	79;85;128;161;162;163;164;165;605;649;650;755;756;757;758;1074;1329;1406;1575	79;85;128;162;605;650;755;1074;1329;1406;1575
sp|Q9HZJ2|FADB_PSEAE	sp|Q9HZJ2|FADB_PSEAE	1	1	1	>sp|Q9HZJ2|FADB_PSEAE Fatty acid oxidation complex subunit alpha OS=Pseudomonas aeruginosa (strain ATCC 15692 / PAO1 / 1C / PRS 101 / LMG 12228) GN=fadB PE=3 SV=1	1	1	1	1	2.5	2.5	2.5	76.953	715	715	0	5.8183	0	1				37	227	TRUE	238	481	1270	1270
sp|Q9I0K4|ACEA_PSEAE	sp|Q9I0K4|ACEA_PSEAE	6	6	6	>sp|Q9I0K4|ACEA_PSEAE Isocitrate lyase OS=Pseudomonas aeruginosa (strain ATCC 15692 / PAO1 / 1C / PRS 101 / LMG 12228) GN=PA2634 PE=1 SV=1	1	6	6	6	15.6	15.6	15.6	58.886	531	531	0	60.399	13023000	18				38	65;153;166;181;219;256	True;True;True;True;True;True	69;160;173;190;230;268	112;113;308;309;327;386;387;465;466;531	236;237;748;749;750;751;752;784;982;983;984;1232;1233;1234;1235;1236;1237;1407	237;749;784;983;1233;1407
sp|Q9I2V5|ACNB_PSEAE	sp|Q9I2V5|ACNB_PSEAE	4	4	4	>sp|Q9I2V5|ACNB_PSEAE Aconitate hydratase B OS=Pseudomonas aeruginosa (strain ATCC 15692 / PAO1 / 1C / PRS 101 / LMG 12228) GN=acnB PE=3 SV=1	1	4	4	4	7.1	7.1	7.1	93.627	869	869	0	31.297	4497300	8				39	48;140;175;225	True;True;True;True	50;147;183;236	78;79;268;344;345;479	171;172;173;174;617;818;819;1268	173;617;818;1268
sp|Q9I3D1|DLDH2_PSEAE	sp|Q9I3D1|DLDH2_PSEAE	4	4	4	>sp|Q9I3D1|DLDH2_PSEAE Dihydrolipoyl dehydrogenase OS=Pseudomonas aeruginosa (strain ATCC 15692 / PAO1 / 1C / PRS 101 / LMG 12228) GN=lpdG PE=3 SV=1	1	4	4	4	12.1	12.1	12.1	50.164	478	478	0	30.763	2592500	3				40	24;33;34;95	True;True;True;True	25;35;36;100	37;54;55;164	101;133;134;346	101;133;134;346
sp|Q9I3F5|ACNA_PSEAE	sp|Q9I3F5|ACNA_PSEAE	7	7	7	>sp|Q9I3F5|ACNA_PSEAE Aconitate hydratase A OS=Pseudomonas aeruginosa (strain ATCC 15692 / PAO1 / 1C / PRS 101 / LMG 12228) GN=acnA PE=3 SV=1	1	7	7	7	13.2	13.2	13.2	99.147	910	910	0	53.371	7733100	14				41	61;133;224;230;231;242;273	True;True;True;True;True;True;True	65;140;235;241;242;253;285	106;257;478;486;487;488;504;575;576	226;604;1267;1275;1276;1277;1278;1279;1327;1328;1571;1572;1573;1574	226;604;1267;1275;1276;1328;1572
sp|Q9I576|HPPD_PSEAE	sp|Q9I576|HPPD_PSEAE	1	1	1	>sp|Q9I576|HPPD_PSEAE 4-hydroxyphenylpyruvate dioxygenase OS=Pseudomonas aeruginosa (strain ATCC 15692 / PAO1 / 1C / PRS 101 / LMG 12228) GN=hpd PE=3 SV=1	1	1	1	1	4.2	4.2	4.2	39.912	357	357	0	19.553	746660	4				42	179	TRUE	188	383;384	977;978;979;980	977
sp|Q9I685|SAHH_PSEAE	sp|Q9I685|SAHH_PSEAE	4	4	4	>sp|Q9I685|SAHH_PSEAE Adenosylhomocysteinase OS=Pseudomonas aeruginosa (strain ATCC 15692 / PAO1 / 1C / PRS 101 / LMG 12228) GN=ahcY PE=3 SV=1	1	4	4	4	11.3	11.3	11.3	51.399	469	469	0	29.455	8542000	9				43	78;116;248;265	True;True;True;True	82;123;259;277	133;134;200;201;514;543	269;270;407;408;409;410;1346;1347;1424	269;408;1346;1424
sp|Q9I6M5|DAVD_PSEAE	sp|Q9I6M5|DAVD_PSEAE	1	1	1	>sp|Q9I6M5|DAVD_PSEAE Glutarate-semialdehyde dehydrogenase DavD OS=Pseudomonas aeruginosa (strain ATCC 15692 / PAO1 / 1C / PRS 101 / LMG 12228) GN=davD PE=1 SV=1	1	1	1	1	3.1	3.1	3.1	51.622	483	483	0	7.7655	825550	1				44	245	TRUE	256	508	1335	1335
sp|Q9I742|CLPV1_PSEAE	sp|Q9I742|CLPV1_PSEAE	1	1	1	>sp|Q9I742|CLPV1_PSEAE Protein ClpV1 OS=Pseudomonas aeruginosa (strain ATCC 15692 / PAO1 / 1C / PRS 101 / LMG 12228) GN=clpV1 PE=1 SV=1	1	1	1	1	1.1	1.1	1.1	98.737	902	902	0	5.7176	0	1				45	195	TRUE	204	412	1024	1024
tr|Q9HTD1|Q9HTD1_PSEAE	tr|Q9HTD1|Q9HTD1_PSEAE	30	30	30	>tr|Q9HTD1|Q9HTD1_PSEAE Probable transcarboxylase subunit OS=Pseudomonas aeruginosa (strain ATCC 15692 / PAO1 / 1C / PRS 101 / LMG 12228) GN=PA5435 PE=4 SV=1	1	30	30	30	54.9	54.9	54.9	66.095	607	607	0	291.73	653190000	261				46	3;4;25;26;30;39;43;53;57;72;75;89;92;93;103;107;131;171;172;189;196;197;222;246;251;252;253;268;269;270	True;True;True;True;True;True;True;True;True;True;True;True;True;True;True;True;True;True;True;True;True;True;True;True;True;True;True;True;True;True	3;4;26;27;28;32;41;45;56;57;61;76;79;93;96;97;98;108;112;113;138;178;179;180;198;205;206;207;233;257;262;263;264;265;280;281;282	6;7;8;9;38;39;40;41;42;43;44;49;50;63;64;69;70;89;90;91;92;99;100;101;102;124;125;129;130;152;153;154;158;159;160;161;162;173;174;180;181;182;183;253;254;335;336;337;338;339;340;401;402;403;404;413;414;415;416;417;418;419;420;421;475;476;509;510;511;518;519;520;521;522;523;524;525;526;527;567;568;569;570;571;572	22;23;24;25;26;27;28;29;30;31;32;33;34;35;36;37;102;103;104;105;106;107;108;109;110;111;112;113;114;115;116;117;123;124;125;126;127;149;150;151;152;158;159;160;194;195;196;197;198;199;200;201;211;212;213;214;215;216;217;218;219;220;221;222;259;260;264;265;266;300;301;302;303;304;305;306;307;308;312;313;314;315;316;317;318;319;320;321;322;323;324;325;326;327;328;329;330;331;332;333;334;335;336;337…	24;31;106;113;124;150;159;199;221;260;266;301;324;334;363;376;599;801;812;1013;1025;1036;1262;1339;1359;1390;1397;1554;1561;1567	6;7;8;9;10;11;12;13	125;169;172;182;274;306;323;435
tr|Q9HTP2|Q9HTP2_PSEAE	tr|Q9HTP2|Q9HTP2_PSEAE	2	2	2	>tr|Q9HTP2|Q9HTP2_PSEAE Probable aldehyde dehydrogenase OS=Pseudomonas aeruginosa (strain ATCC 15692 / PAO1 / 1C / PRS 101 / LMG 12228) GN=PA5312 PE=3 SV=1	1	2	2	2	4.4	4.4	4.4	53.143	497	497	0	11.815	1110400	1				47	73;102	True;True	77;107	126;172	261;360	261;360
tr|Q9HU07|Q9HU07_PSEAE	tr|Q9HU07|Q9HU07_PSEAE	1	1	1	>tr|Q9HU07|Q9HU07_PSEAE Uncharacterized protein OS=Pseudomonas aeruginosa (strain ATCC 15692 / PAO1 / 1C / PRS 101 / LMG 12228) GN=PA5182 PE=4 SV=1	1	1	1	1	37.2	37.2	37.2	14.115	137	137	0	5.7733	24307000	6				48	220	TRUE	231	467;468;469;470	1238;1239;1240;1241;1242;1243	1242
tr|Q9HW49|Q9HW49_PSEAE	tr|Q9HW49|Q9HW49_PSEAE	2	2	2	>tr|Q9HW49|Q9HW49_PSEAE Uncharacterized protein OS=Pseudomonas aeruginosa (strain ATCC 15692 / PAO1 / 1C / PRS 101 / LMG 12228) GN=PA4352 PE=3 SV=1	1	2	2	2	18.5	18.5	18.5	30.972	286	286	0	11.26	836340	3				49	41;237	True;True	43;248	66;495	154;1315;1316	154;1316
tr|Q9HWV0|Q9HWV0_PSEAE	tr|Q9HWV0|Q9HWV0_PSEAE	4	4	4	>tr|Q9HWV0|Q9HWV0_PSEAE Probable nonribosomal peptide synthetase OS=Pseudomonas aeruginosa (strain ATCC 15692 / PAO1 / 1C / PRS 101 / LMG 12228) GN=PA4078 PE=4 SV=1	1	4	4	4	5.8	5.8	5.8	110.35	991	991	0	33.232	2274300	8				50	62;202;235;272	True;True;True;True	66;212;246;284	107;108;428;429;493;574	227;228;229;1060;1061;1062;1313;1570	227;1062;1313;1570
tr|Q9HY13|Q9HY13_PSEAE	tr|Q9HY13|Q9HY13_PSEAE	1	1	1	>tr|Q9HY13|Q9HY13_PSEAE Uncharacterized protein OS=Pseudomonas aeruginosa (strain ATCC 15692 / PAO1 / 1C / PRS 101 / LMG 12228) GN=PA3613 PE=4 SV=1	1	1	1	1	1.9	1.9	1.9	88.378	801	801	0	5.8213	491660	2				51	217	TRUE	228	462	1227;1228	1227
tr|Q9HY81|Q9HY81_PSEAE	tr|Q9HY81|Q9HY81_PSEAE	2	2	2	>tr|Q9HY81|Q9HY81_PSEAE Probable peroxidase OS=Pseudomonas aeruginosa (strain ATCC 15692 / PAO1 / 1C / PRS 101 / LMG 12228) GN=PA3529 PE=1 SV=1	1	2	2	2	12	12	12	21.822	200	200	0	19.326	7126100	8				52	42;210	True;True	44;221	67;68;443;444	155;156;157;1120;1121;1122;1123;1124	157;1120
tr|Q9HYK2|Q9HYK2_PSEAE	tr|Q9HYK2|Q9HYK2_PSEAE	1	1	1	>tr|Q9HYK2|Q9HYK2_PSEAE Uncharacterized protein OS=Pseudomonas aeruginosa (strain ATCC 15692 / PAO1 / 1C / PRS 101 / LMG 12228) GN=PA3402 PE=4 SV=1	1	1	1	1	5.6	5.6	5.6	36.206	323	323	1	-2	798190	1	+			53	123	TRUE	130	237	565	565	14	258
tr|Q9HYT5|Q9HYT5_PSEAE	tr|Q9HYT5|Q9HYT5_PSEAE	3	3	3	>tr|Q9HYT5|Q9HYT5_PSEAE Uncharacterized protein OS=Pseudomonas aeruginosa (strain ATCC 15692 / PAO1 / 1C / PRS 101 / LMG 12228) GN=PA3309 PE=3 SV=1	1	3	3	3	25.2	25.2	25.2	16.496	151	151	0	19.505	8587000	3				54	98;115;239	True;True;True	103;122;250	168;198;199;498;499	356;405;406;1319;1320	356;406;1319
tr|Q9HZG4|Q9HZG4_PSEAE	tr|Q9HZG4|Q9HZG4_PSEAE	2	2	2	>tr|Q9HZG4|Q9HZG4_PSEAE Probable two-component sensor OS=Pseudomonas aeruginosa (strain ATCC 15692 / PAO1 / 1C / PRS 101 / LMG 12228) GN=PA3044 PE=4 SV=1	1	2	2	2	5.7	5.7	5.7	82.21	741	741	0	10.714	2104800	2				55	91;119	True;True	95;126	157;231	311;557	311;557
tr|Q9I0L5|Q9I0L5_PSEAE	tr|Q9I0L5|Q9I0L5_PSEAE	3	3	3	>tr|Q9I0L5|Q9I0L5_PSEAE Isocitrate dehydrogenase [NADP] OS=Pseudomonas aeruginosa (strain ATCC 15692 / PAO1 / 1C / PRS 101 / LMG 12228) GN=icd PE=3 SV=1	1	3	3	3	8.9	8.9	8.9	45.577	418	418	0	24.41	4677400	7				56	22;88;247	True;True;True	23;92;258	34;150;151;512;513	98;298;299;1342;1343;1344;1345	98;299;1344
tr|Q9I0T1|Q9I0T1_PSEAE	tr|Q9I0T1|Q9I0T1_PSEAE	4	4	4	>tr|Q9I0T1|Q9I0T1_PSEAE Probable acyl-CoA thiolase OS=Pseudomonas aeruginosa (strain ATCC 15692 / PAO1 / 1C / PRS 101 / LMG 12228) GN=PA2553 PE=3 SV=1	1	4	4	4	13.9	13.9	13.9	41.4	396	396	0	34.708	5164200	5				57	55;60;125;226	True;True;True;True	59;64;132;237	95;96;105;239;480	206;207;225;567;1269	206;225;567;1269
tr|Q9I1E8|Q9I1E8_PSEAE	tr|Q9I1E8|Q9I1E8_PSEAE	1	1	1	>tr|Q9I1E8|Q9I1E8_PSEAE Uncharacterized protein OS=Pseudomonas aeruginosa (strain ATCC 15692 / PAO1 / 1C / PRS 101 / LMG 12228) GN=PA2330 PE=4 SV=1	1	1	1	1	3.9	3.9	3.9	37.68	355	355	0	5.5839	0	1				58	144	TRUE	151	276	651	651
tr|Q9I246|Q9I246_PSEAE	tr|Q9I246|Q9I246_PSEAE	9	9	9	>tr|Q9I246|Q9I246_PSEAE Probable carbamoyl transferase OS=Pseudomonas aeruginosa (strain ATCC 15692 / PAO1 / 1C / PRS 101 / LMG 12228) GN=PA2069 PE=4 SV=1	1	9	9	9	19.2	19.2	19.2	63.382	574	574	0	61.522	16307000	16				59	47;66;97;99;122;151;187;201;204	True;True;True;True;True;True;True;True;True	49;70;102;104;129;158;196;211;214	77;114;115;167;169;235;236;306;397;398;426;427;431;432	169;170;238;239;355;357;561;562;563;564;742;997;998;1057;1058;1059;1065;1066	169;239;355;357;564;742;998;1059;1066
tr|Q9I250|Q9I250_PSEAE	tr|Q9I250|Q9I250_PSEAE	1	1	1	>tr|Q9I250|Q9I250_PSEAE Copper resistance protein A OS=Pseudomonas aeruginosa (strain ATCC 15692 / PAO1 / 1C / PRS 101 / LMG 12228) GN=pcoA PE=4 SV=1	1	1	1	1	1.6	1.6	1.6	69.85	632	632	0	5.7083	0	1				60	193	TRUE	202	409	1019	1019
tr|Q9I299|Q9I299_PSEAE	tr|Q9I299|Q9I299_PSEAE	12	12	12	>tr|Q9I299|Q9I299_PSEAE Methylcrotonyl-CoA carboxylase, alpha-subunit (Biotin-containing) OS=Pseudomonas aeruginosa (strain ATCC 15692 / PAO1 / 1C / PRS 101 / LMG 12228) GN=liuD PE=1 SV=1	1	12	12	12	26.9	26.9	26.9	71.282	655	655	0	97.001	46986000	27				61	17;56;76;100;109;110;114;137;150;167;223;260	True;True;True;True;True;True;True;True;True;True;True;True	18;60;80;105;115;116;121;144;157;174;234;272	28;29;97;98;131;170;185;186;187;188;197;262;263;305;328;329;477;535;536	86;87;88;89;90;208;209;210;267;358;386;387;388;389;390;404;609;610;741;785;786;787;1266;1411;1412;1413;1414	88;210;267;358;386;389;404;610;741;787;1266;1414
tr|Q9I2A9|Q9I2A9_PSEAE	tr|Q9I2A9|Q9I2A9_PSEAE	1	1	1	>tr|Q9I2A9|Q9I2A9_PSEAE DhcB, dehydrocarnitine CoA transferase, subunit B OS=Pseudomonas aeruginosa (strain ATCC 15692 / PAO1 / 1C / PRS 101 / LMG 12228) GN=dhcB PE=4 SV=1	1	1	1	1	11	11	11	23.187	218	218	0	5.6882	199900	1				62	87	TRUE	91	149	297	297
tr|Q9I2N7|Q9I2N7_PSEAE	tr|Q9I2N7|Q9I2N7_PSEAE	1	1	1	>tr|Q9I2N7|Q9I2N7_PSEAE Streptomycin 3-phosphotransferase OS=Pseudomonas aeruginosa (strain ATCC 15692 / PAO1 / 1C / PRS 101 / LMG 12228) GN=str PE=4 SV=1	1	1	1	1	4	4	4	31.144	275	275	0	5.7055	0	1				63	264	TRUE	276	542	1423	1423
tr|Q9I3D3|Q9I3D3_PSEAE	tr|Q9I3D3|Q9I3D3_PSEAE	5	5	5	>tr|Q9I3D3|Q9I3D3_PSEAE 2-oxoglutarate dehydrogenase (E1 subunit) OS=Pseudomonas aeruginosa (strain ATCC 15692 / PAO1 / 1C / PRS 101 / LMG 12228) GN=sucA PE=4 SV=1	1	5	5	5	9	9	9	105.88	943	943	0	35.15	4520000	8				64	46;156;157;169;173	True;True;True;True;True	48;163;164;176;181	76;313;314;315;332;333;341	168;759;760;761;762;790;791;792;815	168;759;760;790;815
tr|Q9I3D4|Q9I3D4_PSEAE	tr|Q9I3D4|Q9I3D4_PSEAE	1	1	1	>tr|Q9I3D4|Q9I3D4_PSEAE Succinate dehydrogenase (B subunit) OS=Pseudomonas aeruginosa (strain ATCC 15692 / PAO1 / 1C / PRS 101 / LMG 12228) GN=sdhB PE=4 SV=1	1	1	1	1	5.1	5.1	5.1	26.155	235	235	0	9.8864	866920	1				65	71	TRUE	75	123	258	258
tr|Q9I3D5|Q9I3D5_PSEAE	tr|Q9I3D5|Q9I3D5_PSEAE	4	4	4	>tr|Q9I3D5|Q9I3D5_PSEAE Succinate dehydrogenase flavoprotein subunit OS=Pseudomonas aeruginosa (strain ATCC 15692 / PAO1 / 1C / PRS 101 / LMG 12228) GN=sdhA PE=3 SV=1	1	4	4	4	8	8	8	63.531	590	590	0	43.175	13109000	15				66	82;104;105;145	True;True;True;True	86;109;110;152	138;139;175;176;177;277;278;279	275;276;364;365;366;367;368;369;652;653;654;655;656;657;658	276;365;366;652
tr|Q9I3V8|Q9I3V8_PSEAE	tr|Q9I3V8|Q9I3V8_PSEAE	1	1	1	>tr|Q9I3V8|Q9I3V8_PSEAE Probable ATP-binding component of ABC transporter OS=Pseudomonas aeruginosa (strain ATCC 15692 / PAO1 / 1C / PRS 101 / LMG 12228) GN=PA1386 PE=4 SV=1	1	1	1	1	2.4	2.4	2.4	46.995	422	422	0	5.7346	0	1				67	126	TRUE	133	240	568	568
tr|Q9I5I0|Q9I5I0_PSEAE	tr|Q9I5I0|Q9I5I0_PSEAE	2	2	2	>tr|Q9I5I0|Q9I5I0_PSEAE Uncharacterized protein OS=Pseudomonas aeruginosa (strain ATCC 15692 / PAO1 / 1C / PRS 101 / LMG 12228) GN=PA0749 PE=4 SV=1	1	2	2	2	7.3	7.3	7.3	31.882	273	273	0	10.668	2830200	1				68	160;271	True;True	167;283	318;573	765;1569	765;1569
tr|Q9I5U9|Q9I5U9_PSEAE	tr|Q9I5U9|Q9I5U9_PSEAE	6	6	6	>tr|Q9I5U9|Q9I5U9_PSEAE Uncharacterized protein OS=Pseudomonas aeruginosa (strain ATCC 15692 / PAO1 / 1C / PRS 101 / LMG 12228) GN=PA0588 PE=4 SV=1	1	6	6	6	12.5	12.5	12.5	73.722	640	640	0	42.798	7736300	9				69	29;149;154;168;170;262	True;True;True;True;True;True	31;156;161;175;177;274	48;304;310;330;331;334;539	122;740;753;754;788;789;793;1419;1420	122;740;753;788;793;1419
tr|Q9I6Z3|Q9I6Z3_PSEAE	tr|Q9I6Z3|Q9I6Z3_PSEAE	5	5	5	>tr|Q9I6Z3|Q9I6Z3_PSEAE Alkyl hydroperoxide reductase subunit C OS=Pseudomonas aeruginosa (strain ATCC 15692 / PAO1 / 1C / PRS 101 / LMG 12228) GN=ahpC PE=4 SV=1	1	5	5	5	39	39	39	20.541	187	187	0	34.622	11867000	10				70	32;69;90;206;229	True;True;True;True;True	34;73;94;216;240	52;53;120;155;156;435;484;485	129;130;131;132;250;309;310;1071;1273;1274	131;250;310;1071;1273

## Sheet: 6-2 proteinGroups Probe 12
Protein IDs	Majority protein IDs	Peptide counts (all)	Peptide counts (razor+unique)	Peptide counts (unique)	Fasta headers	Number of proteins	Peptides	Razor + unique peptides	Unique peptides	Sequence coverage [%]	Unique + razor sequence coverage [%]	Unique sequence coverage [%]	Mol. weight [kDa]	Sequence length	Sequence lengths	Q-value	Score	Intensity	MS/MS Count	Only identified by site	Reverse	Potential contaminant	id	Peptide IDs	Peptide is razor	Mod. peptide IDs	Evidence IDs	MS/MS IDs	Best MS/MS	Oxidation (M) site IDs	Oxidation (M) site positions
CON__P00761	CON__P00761	4	4	4	>P00761 SWISS-PROT:P00761|TRYP_PIG Trypsin - Sus scrofa (Pig).	1	4	4	4	25.1	25.1	25.1	24.409	231	231	0	68.291	761090000	79			+	0	162;200;233;335	True;True;True;True	170;171;209;243;350	277;278;279;280;357;358;359;360;413;414;677;678;679;680;681;682;683;684;685;686	535;536;537;538;539;540;541;542;752;753;754;755;756;757;758;759;760;761;762;763;764;765;766;767;768;769;770;771;772;773;774;775;776;777;778;779;862;863;864;865;866;867;868;869;1477;1478;1479;1480;1481;1482;1483;1484;1485;1486;1487;1488;1489;1490;1491;1492;1493;1494;1495;1496;1497;1498;1499;1500;1501;1502;1503;1504;1505;1506;1507;1508;1509;1510;1511	536;761;868;1509	0	94
CON__P02535-1;CON__P13645	CON__P02535-1;CON__P13645	1;1	1;1	1;1	>P02535-1 SWISS-PROT:P02535-1 Tax_Id=10090 Gene_Symbol=Krt10 Isoform 1 of Keratin, type I cytoskeletal 10;>P13645 SWISS-PROT:P13645 Tax_Id=9606 Gene_Symbol=KRT10 Keratin, type I cytoskeletal 10	2	1	1	1	1.6	1.6	1.6	57.769	570	570;593	0	6.1261	514790	1			+	1	195	TRUE	204	349	741	741
CON__P07477	CON__P07477	1	1	1	>P07477 SWISS-PROT:P07477 Tax_Id=9606 Gene_Symbol=PRSS1 Trypsin-1 precursor	1	1	1	1	8.1	8.1	8.1	26.558	247	247	0.0092593	5.6046	15359000	3			+	2	201	TRUE	210	361;362	780;781;782	782
CON__Q6IME9	CON__Q6IME9	1	1	1	>Q6IME9 TREMBL:Q6IME9 Tax_Id=10090 Gene_Symbol=Krt72 Type-II keratin Kb35	1	1	1	1	3.3	3.3	3.3	56.75	520	520	0	5.8658	2670700	3			+	3	284	TRUE	297	541	1183;1184;1185	1185
CON__Streptavidin	CON__Streptavidin	4	4	4	>Streptavidin (S.avidinii)	1	4	4	4	43.1	43.1	43.1	16.622	160	160	0	122.89	1792200000	416			+	4	169;260;305;391	True;True;True;True	178;273;320;409	291;292;293;294;295;296;297;298;299;300;301;302;303;304;305;306;307;308;467;468;469;470;471;472;473;474;475;476;477;478;479;480;481;482;483;484;485;486;487;488;489;490;491;492;493;494;495;496;497;498;577;578;579;580;581;582;583;584;585;586;587;588;589;590;591;592;593;594;595;596;597;598;599;600;601;602;603;604;605;606;607;608;609;610;611;612;613;614;615;616;617;618;619;620;621;622;777;778;779;780…	558;559;560;561;562;563;564;565;566;567;568;569;570;571;572;573;574;575;576;577;578;579;580;581;582;583;584;585;586;587;588;589;590;591;592;593;594;595;596;597;598;599;600;601;602;603;604;605;606;607;608;609;610;611;612;613;614;615;616;617;618;619;620;621;622;623;624;625;626;627;628;629;630;631;632;633;634;635;636;637;638;639;640;641;642;643;644;645;646;647;648;649;650;651;652;653;654;655;656;657…	654;1069;1311;1673
REV__tr|Q9HXW2|Q9HXW2_PSEAE	REV__tr|Q9HXW2|Q9HXW2_PSEAE	1	1	1	>tr|Q9HXW2|Q9HXW2_PSEAE Probable transcriptional regulator OS=Pseudomonas aeruginosa (strain ATCC 15692 / PAO1 / 1C / PRS 101 / LMG 12228) GN=PA3678 PE=4 SV=1	1	1	1	1	0	0	0	23.15	212	212	0.010101	5.7918	140210000	7		+		5	182	TRUE	191	327;328	712;713;714;715;716;717;718	712
sp|G3XD23|WBPB_PSEAE	sp|G3XD23|WBPB_PSEAE	1	1	1	>sp|G3XD23|WBPB_PSEAE UDP-N-acetyl-2-amino-2-deoxy-D-glucuronate oxidase OS=Pseudomonas aeruginosa (strain ATCC 15692 / PAO1 / 1C / PRS 101 / LMG 12228) GN=wbpB PE=1 SV=1	1	1	1	1	6.6	6.6	6.6	35.717	316	316	0.0086957	5.5153	958720	1				6	292	TRUE	305	552	1197	1197
sp|O52759|RS4_PSEAE	sp|O52759|RS4_PSEAE	2	2	2	>sp|O52759|RS4_PSEAE 30S ribosomal protein S4 OS=Pseudomonas aeruginosa (strain ATCC 15692 / PAO1 / 1C / PRS 101 / LMG 12228) GN=rpsD PE=3 SV=2	1	2	2	2	12.6	12.6	12.6	23.277	206	206	0	23.563	12602000	4				7	24;231	True;True	26;241	44;45;409;410	121;122;858;859	121;858
sp|O52762|CATA_PSEAE	sp|O52762|CATA_PSEAE	5	5	5	>sp|O52762|CATA_PSEAE Catalase OS=Pseudomonas aeruginosa (strain ATCC 15692 / PAO1 / 1C / PRS 101 / LMG 12228) GN=katA PE=1 SV=1	1	5	5	5	13.9	13.9	13.9	55.588	482	482	0	58.531	15029000	12				8	135;196;207;238;258	True;True;True;True;True	141;205;216;248;271	229;350;351;368;420;421;464	439;742;743;744;745;791;792;878;879;880;881;882;977	439;745;792;881;977
sp|O68822|AMPA_PSEAE	sp|O68822|AMPA_PSEAE	9	9	9	>sp|O68822|AMPA_PSEAE Cytosol aminopeptidase OS=Pseudomonas aeruginosa (strain ATCC 15692 / PAO1 / 1C / PRS 101 / LMG 12228) GN=pepA PE=3 SV=1	1	9	9	9	21.6	21.6	21.6	52.331	495	495	0	76.911	66044000	25				9	58;59;85;129;191;211;219;315;346	True;True;True;True;True;True;True;True;True	63;64;91;135;200;220;228;330;363	105;106;107;152;153;221;222;342;378;379;391;392;640;703;704	231;232;233;234;235;327;328;426;427;428;429;430;734;809;810;811;812;813;814;828;829;830;831;1398;1399;1538;1539	233;235;327;427;734;809;829;1399;1538
sp|O69753|PHZB1_PSEAE	sp|O69753|PHZB1_PSEAE	3	1	1	>sp|O69753|PHZB1_PSEAE Phenazine biosynthesis protein PhzB 1 OS=Pseudomonas aeruginosa (strain ATCC 15692 / PAO1 / 1C / PRS 101 / LMG 12228) GN=phzB1 PE=3 SV=1	1	3	1	1	16.7	9.9	9.9	18.888	162	162	0	9.439	2038300	1				10	37;38;279	False;False;True	39;40;292	67;68;69;70;531	155;156;157;158;159;160;161;1169	158;160;1169
sp|O69754|PHZF_PSEAE	sp|O69754|PHZF_PSEAE	1	1	1	>sp|O69754|PHZF_PSEAE Trans-2,3-dihydro-3-hydroxyanthranilate isomerase OS=Pseudomonas aeruginosa (strain ATCC 15692 / PAO1 / 1C / PRS 101 / LMG 12228) GN=phzF1 PE=3 SV=2	1	1	1	1	10.8	10.8	10.8	30.342	278	278	0.0086207	5.5018	6053800	2				11	156	TRUE	164	269	524;525	524
sp|O82851|EFTS_PSEAE	sp|O82851|EFTS_PSEAE	1	1	1	>sp|O82851|EFTS_PSEAE Elongation factor Ts OS=Pseudomonas aeruginosa (strain ATCC 15692 / PAO1 / 1C / PRS 101 / LMG 12228) GN=tsf PE=3 SV=1	1	1	1	1	3.8	3.8	3.8	30.653	289	289	0	5.8318	1614300	1				12	236	TRUE	246	418	876	876
sp|O86428|ILVE_PSEAE	sp|O86428|ILVE_PSEAE	1	1	1	>sp|O86428|ILVE_PSEAE Branched-chain-amino-acid aminotransferase OS=Pseudomonas aeruginosa (strain ATCC 15692 / PAO1 / 1C / PRS 101 / LMG 12228) GN=ilvE PE=1 SV=2	1	1	1	1	3.9	3.9	3.9	34.084	307	307	0.0081967	5.4393	2758800	1				13	64	TRUE	69	114	246	246
sp|P04739|FMPO_PSEAE	sp|P04739|FMPO_PSEAE	1	1	1	>sp|P04739|FMPO_PSEAE Fimbrial protein OS=Pseudomonas aeruginosa (strain ATCC 15692 / PAO1 / 1C / PRS 101 / LMG 12228) GN=pilA PE=1 SV=1	1	1	1	1	9.4	9.4	9.4	15.512	149	149	0	10.643	7554400	3				14	296	TRUE	310	560;561	1215;1216;1217	1217
sp|P05384|DBHB_PSEAE	sp|P05384|DBHB_PSEAE	3	3	3	>sp|P05384|DBHB_PSEAE DNA-binding protein HU-beta OS=Pseudomonas aeruginosa (strain ATCC 15692 / PAO1 / 1C / PRS 101 / LMG 12228) GN=hupB PE=1 SV=3	1	3	3	3	50	50	50	9.0865	90	90	0	22.566	25859000	5				15	14;27;297	True;True;True	14;29;311	26;49;50;51;562	69;127;128;129;130;131;1218	69;128;1218
sp|P08308|OTCC_PSEAE	sp|P08308|OTCC_PSEAE	8	8	8	>sp|P08308|OTCC_PSEAE Ornithine carbamoyltransferase, catabolic OS=Pseudomonas aeruginosa (strain ATCC 15692 / PAO1 / 1C / PRS 101 / LMG 12228) GN=arcB PE=1 SV=3	1	8	8	8	25.6	25.6	25.6	38.108	336	336	0	52.533	50146000	17				16	98;105;163;237;257;267;271;396	True;True;True;True;True;True;True;True	104;111;172;247;270;280;284;414	169;170;182;281;419;462;463;511;518;519;803;804	349;350;351;368;369;543;877;973;974;975;976;1138;1150;1151;1152;1768;1769	349;369;543;877;973;1138;1152;1768
sp|P09591|EFTU_PSEAE	sp|P09591|EFTU_PSEAE	10	10	10	>sp|P09591|EFTU_PSEAE Elongation factor Tu OS=Pseudomonas aeruginosa (strain ATCC 15692 / PAO1 / 1C / PRS 101 / LMG 12228) GN=tufA PE=1 SV=2	1	10	10	10	36	36	36	43.369	397	397	0	121.66	354900000	93				17	15;20;69;75;128;145;239;256;328;370	True;True;True;True;True;True;True;True;True;True	15;21;22;74;80;134;152;249;268;269;343;387	27;28;37;38;39;121;122;132;217;218;219;220;246;247;248;249;422;423;424;425;455;456;457;458;459;460;461;665;666;739;740	70;71;72;73;74;75;76;77;78;79;80;81;82;83;84;85;107;108;109;110;111;112;113;114;115;261;262;278;279;413;414;415;416;417;418;419;420;421;422;423;424;425;484;485;486;487;488;489;490;491;492;883;884;885;886;887;888;889;951;952;953;954;955;956;957;958;959;960;961;962;963;964;965;966;967;968;969;970;971;972;1461;1462;1594;1595;1596;1597;1598;1599;1600;1601;1602;1603;1604;1605	71;109;261;278;423;485;884;961;1461;1595	1;2;3	216;362;372
sp|P11221|OPRI_PSEAE	sp|P11221|OPRI_PSEAE	1	1	1	>sp|P11221|OPRI_PSEAE Major outer membrane lipoprotein OS=Pseudomonas aeruginosa (strain ATCC 15692 / PAO1 / 1C / PRS 101 / LMG 12228) GN=oprI PE=3 SV=1	1	1	1	1	12	12	12	8.8348	83	83	0	7.2593	1079700	5				18	235	TRUE	245	416;417	871;872;873;874;875	871
sp|P13794|PORF_PSEAE	sp|P13794|PORF_PSEAE	4	4	4	>sp|P13794|PORF_PSEAE Outer membrane porin F OS=Pseudomonas aeruginosa (strain ATCC 15692 / PAO1 / 1C / PRS 101 / LMG 12228) GN=oprF PE=1 SV=1	1	4	4	4	12.9	12.9	12.9	37.639	350	350	0	44.875	42954000	24				19	80;289;337;360	True;True;True;True	86;302;352;377	141;142;547;688;689;724;725;726;727	295;296;297;298;299;300;301;302;1191;1192;1513;1514;1515;1569;1570;1571;1572;1573;1574;1575;1576;1577;1578;1579	296;1192;1513;1570
sp|P13981|ARCA_PSEAE	sp|P13981|ARCA_PSEAE	15	15	15	>sp|P13981|ARCA_PSEAE Arginine deiminase OS=Pseudomonas aeruginosa (strain ATCC 15692 / PAO1 / 1C / PRS 101 / LMG 12228) GN=arcA PE=1 SV=2	1	15	15	15	48.3	48.3	48.3	46.435	418	418	0	155.93	198910000	70				20	17;73;76;93;103;126;171;177;275;281;310;318;319;351;382	True;True;True;True;True;True;True;True;True;True;True;True;True;True;True	18;78;81;99;109;132;180;186;288;294;325;333;334;368;400	34;127;128;133;134;162;163;178;179;215;310;311;318;319;525;526;533;534;628;629;646;647;648;649;650;651;652;653;710;764;765	104;268;269;270;271;280;281;282;283;338;339;340;360;361;362;363;411;688;689;698;699;700;1159;1160;1161;1162;1171;1172;1173;1174;1355;1356;1357;1417;1418;1419;1420;1421;1422;1423;1424;1425;1426;1427;1428;1429;1430;1431;1432;1433;1434;1435;1436;1437;1438;1439;1440;1441;1442;1443;1444;1445;1446;1447;1549;1550;1656;1657;1658;1659	104;269;280;339;360;411;688;699;1159;1171;1355;1418;1428;1550;1658
sp|P13982|ARCC_PSEAE	sp|P13982|ARCC_PSEAE	2	2	2	>sp|P13982|ARCC_PSEAE Carbamate kinase OS=Pseudomonas aeruginosa (strain ATCC 15692 / PAO1 / 1C / PRS 101 / LMG 12228) GN=arcC PE=3 SV=1	1	2	2	2	9.4	9.4	9.4	33.08	310	310	0	19.02	3890000	2				21	18;67	True;True	19;72	35;118	105;251	105;251
sp|P15276|ALGP_PSEAE	sp|P15276|ALGP_PSEAE	1	1	1	>sp|P15276|ALGP_PSEAE Transcriptional regulatory protein AlgP OS=Pseudomonas aeruginosa (strain ATCC 15692 / PAO1 / 1C / PRS 101 / LMG 12228) GN=algP PE=4 SV=2	1	1	1	1	4	4	4	34.49	352	352	0	11.935	9805700	2				22	101	TRUE	107	175;176	357;358	358
sp|P28810|MMSA_PSEAE	sp|P28810|MMSA_PSEAE	1	1	1	>sp|P28810|MMSA_PSEAE Methylmalonate-semialdehyde dehydrogenase [acylating] OS=Pseudomonas aeruginosa (strain ATCC 15692 / PAO1 / 1C / PRS 101 / LMG 12228) GN=mmsA PE=1 SV=2	1	1	1	1	3.4	3.4	3.4	53.663	497	497	0	9.698	4184500	2				23	210	TRUE	219	376;377	807;808	807
sp|P30718|CH60_PSEAE	sp|P30718|CH60_PSEAE	19	19	19	>sp|P30718|CH60_PSEAE 60 kDa chaperonin OS=Pseudomonas aeruginosa (strain ATCC 15692 / PAO1 / 1C / PRS 101 / LMG 12228) GN=groL PE=1 SV=3	1	19	19	19	48.8	48.8	48.8	57.085	547	547	0	218.8	356300000	114				24	3;16;34;35;42;43;55;56;57;74;99;100;107;117;144;185;252;283;341	True;True;True;True;True;True;True;True;True;True;True;True;True;True;True;True;True;True;True	3;16;17;36;37;46;47;59;60;61;62;79;105;106;113;123;151;194;263;264;296;356;357	5;6;7;29;30;31;32;33;60;61;62;63;64;78;79;80;81;82;83;100;101;102;103;104;129;130;131;171;172;173;174;185;186;201;202;245;332;447;448;449;450;539;540;693;694;695	25;26;27;28;29;30;31;32;33;34;86;87;88;89;90;91;92;93;94;95;96;97;98;99;100;101;102;103;142;143;144;145;146;147;148;149;150;151;152;174;175;176;177;178;179;180;181;182;183;184;185;186;187;188;189;190;191;192;193;194;195;196;197;198;199;224;225;226;227;228;229;230;272;273;274;275;276;277;352;353;354;355;356;372;373;390;391;392;393;483;723;932;933;934;935;936;937;938;939;940;941;942;943;944;945;946…	31;91;142;152;175;191;224;226;230;272;353;355;372;390;483;723;942;1181;1521	4;5;6;7	16;111;267;389
sp|P37798|ACCC_PSEAE	sp|P37798|ACCC_PSEAE	1	1	1	>sp|P37798|ACCC_PSEAE Biotin carboxylase OS=Pseudomonas aeruginosa (strain ATCC 15692 / PAO1 / 1C / PRS 101 / LMG 12228) GN=accC PE=1 SV=1	1	1	1	1	3.1	3.1	3.1	48.887	449	449	0.009009	5.5881	431820	1				25	350	TRUE	367	709	1548	1548
sp|P37799|BCCP_PSEAE	sp|P37799|BCCP_PSEAE	8	8	8	>sp|P37799|BCCP_PSEAE Biotin carboxyl carrier protein of acetyl-CoA carboxylase OS=Pseudomonas aeruginosa (strain ATCC 15692 / PAO1 / 1C / PRS 101 / LMG 12228) GN=accB PE=3 SV=1	1	8	8	8	62.2	62.2	62.2	16.455	156	156	0	118.04	950700000	124				26	2;179;180;208;209;224;303;311	True;True;True;True;True;True;True;True	2;188;189;217;218;234;317;318;326	2;3;4;321;322;323;324;369;370;371;372;373;374;375;401;571;572;573;574;630;631;632;633;634;635	2;3;4;5;6;7;8;9;10;11;12;13;14;15;16;17;18;19;20;21;22;23;24;702;703;704;705;706;707;708;709;793;794;795;796;797;798;799;800;801;802;803;804;805;806;847;1228;1229;1230;1231;1232;1233;1234;1235;1236;1237;1238;1239;1240;1241;1242;1243;1244;1245;1246;1247;1248;1249;1250;1251;1252;1253;1254;1255;1256;1257;1258;1259;1260;1261;1262;1263;1264;1265;1266;1267;1268;1269;1270;1271;1358;1359;1360;1361;1362;1…	4;706;708;793;802;847;1248;1360	8	87
sp|P43336|PHHC_PSEAE	sp|P43336|PHHC_PSEAE	2	2	2	>sp|P43336|PHHC_PSEAE Aromatic-amino-acid aminotransferase OS=Pseudomonas aeruginosa (strain ATCC 15692 / PAO1 / 1C / PRS 101 / LMG 12228) GN=phhC PE=3 SV=2	1	2	2	2	7.8	7.8	7.8	43.273	399	399	0	20.324	15556000	6				27	183;366	True;True	192;383	329;330;733;734	719;720;721;1587;1588;1589	721;1587
sp|P47204|FTSZ_PSEAE	sp|P47204|FTSZ_PSEAE	1	1	1	>sp|P47204|FTSZ_PSEAE Cell division protein FtsZ OS=Pseudomonas aeruginosa (strain ATCC 15692 / PAO1 / 1C / PRS 101 / LMG 12228) GN=ftsZ PE=1 SV=2	1	1	1	1	4.8	4.8	4.8	41.218	394	394	0	7.5758	522660	3				28	380	TRUE	398	760;761	1650;1651;1652	1650
sp|P53593|SUCC_PSEAE	sp|P53593|SUCC_PSEAE	8	8	8	>sp|P53593|SUCC_PSEAE Succinyl-CoA ligase [ADP-forming] subunit beta OS=Pseudomonas aeruginosa (strain ATCC 15692 / PAO1 / 1C / PRS 101 / LMG 12228) GN=sucC PE=3 SV=2	1	8	8	8	29.4	29.4	29.4	41.542	388	388	0	122.45	58747000	30				29	10;53;94;168;197;269;285;353	True;True;True;True;True;True;True;True	10;57;100;177;206;282;298;370	19;20;97;164;289;290;352;353;513;514;542;712;713;714;715	58;59;60;61;220;221;341;342;553;554;555;556;557;746;747;748;1140;1141;1142;1143;1144;1145;1186;1552;1553;1554;1555;1556;1557;1558	58;221;342;553;746;1141;1186;1554
sp|P53641|SODF_PSEAE	sp|P53641|SODF_PSEAE	1	1	1	>sp|P53641|SODF_PSEAE Superoxide dismutase [Fe] OS=Pseudomonas aeruginosa (strain ATCC 15692 / PAO1 / 1C / PRS 101 / LMG 12228) GN=sodB PE=3 SV=3	1	1	1	1	5.7	5.7	5.7	21.351	193	193	0	6.7469	12909000	3				30	11	TRUE	11	21;22	62;63;64	62
sp|P57668|TPX_PSEAE	sp|P57668|TPX_PSEAE	1	1	1	>sp|P57668|TPX_PSEAE Probable thiol peroxidase OS=Pseudomonas aeruginosa (strain ATCC 15692 / PAO1 / 1C / PRS 101 / LMG 12228) GN=tpx PE=3 SV=1	1	1	1	1	7.9	7.9	7.9	17.234	165	165	0	5.9833	884510	0				31	133	TRUE	139	227	435	435
sp|P72173|AAT_PSEAE	sp|P72173|AAT_PSEAE	1	1	1	>sp|P72173|AAT_PSEAE Aspartate aminotransferase OS=Pseudomonas aeruginosa (strain ATCC 15692 / PAO1 / 1C / PRS 101 / LMG 12228) GN=aspC PE=3 SV=2	1	1	1	1	3.5	3.5	3.5	43.319	398	398	0	9.268	1313100	1				32	383	TRUE	401	766	1660	1660
sp|Q51561|RPOB_PSEAE	sp|Q51561|RPOB_PSEAE	4	4	4	>sp|Q51561|RPOB_PSEAE DNA-directed RNA polymerase subunit beta OS=Pseudomonas aeruginosa (strain ATCC 15692 / PAO1 / 1C / PRS 101 / LMG 12228) GN=rpoB PE=3 SV=2	1	4	4	4	4.6	4.6	4.6	150.84	1357	1357	0	22.608	4913000	3				33	29;174;287;375	True;True;True;True	31;183;300;393	54;315;544;751	136;694;1188;1639	136;694;1188;1639
sp|Q51567|SUCD_PSEAE	sp|Q51567|SUCD_PSEAE	3	3	3	>sp|Q51567|SUCD_PSEAE Succinyl-CoA ligase [ADP-forming] subunit alpha OS=Pseudomonas aeruginosa (strain ATCC 15692 / PAO1 / 1C / PRS 101 / LMG 12228) GN=sucD PE=3 SV=2	1	3	3	3	10.5	10.5	10.5	30.266	295	295	0	19.732	12280000	8				34	25;104;299	True;True;True	27;110;313	46;47;180;181;565	123;124;125;364;365;366;367;1221	124;364;1221
sp|Q59636|NDK_PSEAE	sp|Q59636|NDK_PSEAE	1	1	1	>sp|Q59636|NDK_PSEAE Nucleoside diphosphate kinase OS=Pseudomonas aeruginosa (strain ATCC 15692 / PAO1 / 1C / PRS 101 / LMG 12228) GN=ndk PE=3 SV=2	1	1	1	1	6.3	6.3	6.3	15.592	143	143	0	5.9517	1058300	1				35	276	TRUE	289	527	1163	1163
sp|Q59637|ODP1_PSEAE	sp|Q59637|ODP1_PSEAE	6	6	6	>sp|Q59637|ODP1_PSEAE Pyruvate dehydrogenase E1 component OS=Pseudomonas aeruginosa (strain ATCC 15692 / PAO1 / 1C / PRS 101 / LMG 12228) GN=aceE PE=3 SV=2	1	6	6	6	7.5	7.5	7.5	99.563	882	882	0	36.493	20102000	7				36	70;92;160;175;300;357	True;True;True;True;True;True	75;98;168;184;314;374	123;161;274;275;316;566;567;720	263;337;532;533;695;1222;1223;1224;1564	263;337;533;695;1222;1564
sp|Q9HT16|ATPF_PSEAE	sp|Q9HT16|ATPF_PSEAE	1	1	1	>sp|Q9HT16|ATPF_PSEAE ATP synthase subunit b OS=Pseudomonas aeruginosa (strain ATCC 15692 / PAO1 / 1C / PRS 101 / LMG 12228) GN=atpF PE=3 SV=1	1	1	1	1	8.3	8.3	8.3	16.956	156	156	0	8.1699	831320	1				37	50	TRUE	54	94	217	217
sp|Q9HT18|ATPA_PSEAE	sp|Q9HT18|ATPA_PSEAE	10	10	10	>sp|Q9HT18|ATPA_PSEAE ATP synthase subunit alpha OS=Pseudomonas aeruginosa (strain ATCC 15692 / PAO1 / 1C / PRS 101 / LMG 12228) GN=atpA PE=3 SV=1	1	10	10	10	22.6	22.6	22.6	55.393	514	514	0	85.213	64129000	21				38	122;164;253;263;307;308;313;347;378;379	True;True;True;True;True;True;True;True;True;True	128;173;265;276;322;323;328;364;396;397	209;210;282;283;451;503;504;625;626;637;638;705;755;756;757;758;759	402;403;404;544;545;546;947;1129;1130;1351;1352;1353;1395;1396;1540;1643;1644;1645;1646;1647;1648;1649	402;544;947;1129;1351;1353;1395;1540;1644;1649
sp|Q9HT20|ATPB_PSEAE	sp|Q9HT20|ATPB_PSEAE	4	4	4	>sp|Q9HT20|ATPB_PSEAE ATP synthase subunit beta OS=Pseudomonas aeruginosa (strain ATCC 15692 / PAO1 / 1C / PRS 101 / LMG 12228) GN=atpD PE=3 SV=1	1	4	4	4	10.3	10.3	10.3	49.499	458	458	0	26.972	14228000	6				39	79;333;344;398	True;True;True;True	85;348;361;416	140;674;675;700;701;807;808	294;1473;1474;1475;1535;1536;1773;1774	294;1474;1535;1774
sp|Q9HTD7|ASPA_PSEAE	sp|Q9HTD7|ASPA_PSEAE	1	1	1	>sp|Q9HTD7|ASPA_PSEAE Aspartate ammonia-lyase OS=Pseudomonas aeruginosa (strain ATCC 15692 / PAO1 / 1C / PRS 101 / LMG 12228) GN=aspA PE=3 SV=1	1	1	1	1	5.1	5.1	5.1	51.069	474	474	0	5.8871	507030	1				40	206	TRUE	215	367	790	790
sp|Q9HTN8|RL28_PSEAE	sp|Q9HTN8|RL28_PSEAE	1	1	1	>sp|Q9HTN8|RL28_PSEAE 50S ribosomal protein L28 OS=Pseudomonas aeruginosa (strain ATCC 15692 / PAO1 / 1C / PRS 101 / LMG 12228) GN=rpmB PE=3 SV=1	1	1	1	1	12.8	12.8	12.8	9.0655	78	78	0	6.7975	1532600	1				41	127	TRUE	133	216	412	412
sp|Q9HU21|RMLC_PSEAE	sp|Q9HU21|RMLC_PSEAE	1	1	1	>sp|Q9HU21|RMLC_PSEAE dTDP-4-dehydrorhamnose 3,5-epimerase OS=Pseudomonas aeruginosa (strain ATCC 15692 / PAO1 / 1C / PRS 101 / LMG 12228) GN=rmlC PE=1 SV=1	1	1	1	1	6.6	6.6	6.6	20.766	181	181	0	6.3914	3863100	1				42	187	TRUE	196	335	727	727
sp|Q9HU65|GLNA_PSEAE	sp|Q9HU65|GLNA_PSEAE	3	3	3	>sp|Q9HU65|GLNA_PSEAE Glutamine synthetase OS=Pseudomonas aeruginosa (strain ATCC 15692 / PAO1 / 1C / PRS 101 / LMG 12228) GN=glnA PE=1 SV=1	1	3	3	3	14.1	14.1	14.1	51.944	469	469	0	31.311	5442900	5				43	112;242;274	True;True;True	118;252;287	194;429;523;524	383;893;1156;1157;1158	383;893;1156
sp|Q9HU83|HUTU_PSEAE	sp|Q9HU83|HUTU_PSEAE	1	1	1	>sp|Q9HU83|HUTU_PSEAE Urocanate hydratase OS=Pseudomonas aeruginosa (strain ATCC 15692 / PAO1 / 1C / PRS 101 / LMG 12228) GN=hutU PE=1 SV=1	1	1	1	1	3.4	3.4	3.4	61.193	559	559	0.009901	5.767	615810	2				44	23	TRUE	25	43	119;120	120
sp|Q9HUC0|UBIE_PSEAE	sp|Q9HUC0|UBIE_PSEAE	1	1	1	>sp|Q9HUC0|UBIE_PSEAE Ubiquinone/menaquinone biosynthesis C-methyltransferase UbiE OS=Pseudomonas aeruginosa (strain ATCC 15692 / PAO1 / 1C / PRS 101 / LMG 12228) GN=ubiE PE=3 SV=1	1	1	1	1	5.1	5.1	5.1	28.254	256	256	0.0088496	5.5762	618920	0				45	356	TRUE	373	719	1563	1563
sp|Q9HUM0|HFQ_PSEAE	sp|Q9HUM0|HFQ_PSEAE	1	1	1	>sp|Q9HUM0|HFQ_PSEAE RNA-binding protein Hfq OS=Pseudomonas aeruginosa (strain ATCC 15692 / PAO1 / 1C / PRS 101 / LMG 12228) GN=hfq PE=1 SV=1	1	1	1	1	15.9	15.9	15.9	9.1034	82	82	0.0089286	5.5881	246940	0				46	230	TRUE	240	408	857	857
sp|Q9HUM6|PURA_PSEAE	sp|Q9HUM6|PURA_PSEAE	1	1	1	>sp|Q9HUM6|PURA_PSEAE Adenylosuccinate synthetase OS=Pseudomonas aeruginosa (strain ATCC 15692 / PAO1 / 1C / PRS 101 / LMG 12228) GN=purA PE=3 SV=1	1	1	1	1	3.3	3.3	3.3	46.814	430	430	0	5.8015	1109900	0				47	173	TRUE	182	314	693	693
sp|Q9HVA2|ILVC_PSEAE	sp|Q9HVA2|ILVC_PSEAE	1	1	1	>sp|Q9HVA2|ILVC_PSEAE Ketol-acid reductoisomerase OS=Pseudomonas aeruginosa (strain ATCC 15692 / PAO1 / 1C / PRS 101 / LMG 12228) GN=ilvC PE=1 SV=1	1	1	1	1	5.6	5.6	5.6	36.424	338	338	0	7.6048	1092300	1				48	123	TRUE	129	211	405	405
sp|Q9HVT2|Y4489_PSEAE	sp|Q9HVT2|Y4489_PSEAE	1	1	1	>sp|Q9HVT2|Y4489_PSEAE UPF0192 protein PA4489 OS=Pseudomonas aeruginosa (strain ATCC 15692 / PAO1 / 1C / PRS 101 / LMG 12228) GN=PA4489 PE=3 SV=1	1	1	1	1	0.7	0.7	0.7	167.43	1516	1516	0.0090909	5.589	1156800	0				49	120	TRUE	126	206	397	397
sp|Q9HVY3|RS9_PSEAE	sp|Q9HVY3|RS9_PSEAE	1	1	1	>sp|Q9HVY3|RS9_PSEAE 30S ribosomal protein S9 OS=Pseudomonas aeruginosa (strain ATCC 15692 / PAO1 / 1C / PRS 101 / LMG 12228) GN=rpsI PE=3 SV=1	1	1	1	1	7.7	7.7	7.7	14.615	130	130	0	6.4912	3298500	2				50	31	TRUE	33	56;57	138;139	139
sp|Q9HW11|Y4395_PSEAE	sp|Q9HW11|Y4395_PSEAE	1	1	1	>sp|Q9HW11|Y4395_PSEAE UPF0234 protein PA4395 OS=Pseudomonas aeruginosa (strain ATCC 15692 / PAO1 / 1C / PRS 101 / LMG 12228) GN=PA4395 PE=3 SV=1	1	1	1	1	6.9	6.9	6.9	18.044	159	159	0.009434	5.621	123520	1				51	369	TRUE	386	738	1593	1593
sp|Q9HWC8|RL7_PSEAE	sp|Q9HWC8|RL7_PSEAE	1	1	1	>sp|Q9HWC8|RL7_PSEAE 50S ribosomal protein L7/L12 OS=Pseudomonas aeruginosa (strain ATCC 15692 / PAO1 / 1C / PRS 101 / LMG 12228) GN=rplL PE=3 SV=1	1	1	1	1	9	9	9	12.479	122	122	0.01	5.772	851480	1				52	63	TRUE	68	113	245	245
sp|Q9HWC9|RPOC_PSEAE	sp|Q9HWC9|RPOC_PSEAE	3	3	3	>sp|Q9HWC9|RPOC_PSEAE DNA-directed RNA polymerase subunit beta OS=Pseudomonas aeruginosa (strain ATCC 15692 / PAO1 / 1C / PRS 101 / LMG 12228) GN=rpoC PE=3 SV=1	1	3	3	3	3	3	3	154.38	1399	1399	0	18.946	4020600	3				53	90;205;215	True;True;True	96;214;224	159;366;385	335;789;822	335;789;822
sp|Q9HWD1|RS7_PSEAE	sp|Q9HWD1|RS7_PSEAE	2	2	2	>sp|Q9HWD1|RS7_PSEAE 30S ribosomal protein S7 OS=Pseudomonas aeruginosa (strain ATCC 15692 / PAO1 / 1C / PRS 101 / LMG 12228) GN=rpsG PE=3 SV=1	1	2	2	2	15.4	15.4	15.4	17.504	156	156	0	12.617	2561000	2				54	26;184	True;True	28;193	48;331	126;722	126;722
sp|Q9HWD2|EFG1_PSEAE;sp|Q9I244|EFG2_PSEAE	sp|Q9HWD2|EFG1_PSEAE;sp|Q9I244|EFG2_PSEAE	9;5	9;5	9;5	>sp|Q9HWD2|EFG1_PSEAE Elongation factor G 1 OS=Pseudomonas aeruginosa (strain ATCC 15692 / PAO1 / 1C / PRS 101 / LMG 12228) GN=fusA PE=1 SV=1;>sp|Q9I244|EFG2_PSEAE Elongation factor G 2 OS=Pseudomonas aeruginosa (strain ATCC 15692 / PAO1 / 1C / PRS 101 / L	2	9	9	9	17.7	17.7	17.7	77.784	706	706;702	0	101.64	55635000	20				55	9;13;88;149;190;248;266;385;389	True;True;True;True;True;True;True;True;True	9;13;94;156;199;258;279;403;407	17;18;25;156;255;256;340;341;437;438;509;510;768;769;774;775	56;57;67;68;331;498;499;732;733;903;904;905;906;1136;1137;1662;1663;1664;1665;1670;1671	57;68;331;499;732;903;1137;1664;1671
sp|Q9HWD5|RL3_PSEAE	sp|Q9HWD5|RL3_PSEAE	2	2	2	>sp|Q9HWD5|RL3_PSEAE 50S ribosomal protein L3 OS=Pseudomonas aeruginosa (strain ATCC 15692 / PAO1 / 1C / PRS 101 / LMG 12228) GN=rplC PE=3 SV=1	1	2	2	2	13.3	13.3	13.3	22.591	211	211	0	11.902	6647600	4				56	115;377	True;True	121;395	198;199;753;754	387;388;1641;1642	388;1641
sp|Q9HWD8|RL2_PSEAE	sp|Q9HWD8|RL2_PSEAE	2	2	2	>sp|Q9HWD8|RL2_PSEAE 50S ribosomal protein L2 OS=Pseudomonas aeruginosa (strain ATCC 15692 / PAO1 / 1C / PRS 101 / LMG 12228) GN=rplB PE=3 SV=1	1	2	2	2	11.4	11.4	11.4	29.579	273	273	0	16.472	9870100	4				57	54;140	True;True	58;147	98;99;239;240	222;223;477;478	222;478
sp|Q9HWE1|RS3_PSEAE	sp|Q9HWE1|RS3_PSEAE	1	1	1	>sp|Q9HWE1|RS3_PSEAE 30S ribosomal protein S3 OS=Pseudomonas aeruginosa (strain ATCC 15692 / PAO1 / 1C / PRS 101 / LMG 12228) GN=rpsC PE=3 SV=1	1	1	1	1	4.8	4.8	4.8	25.838	228	228	0.0096154	5.646	747400	0				58	277	TRUE	290	528	1164	1164
sp|Q9HWE2|RL16_PSEAE	sp|Q9HWE2|RL16_PSEAE	1	1	1	>sp|Q9HWE2|RL16_PSEAE 50S ribosomal protein L16 OS=Pseudomonas aeruginosa (strain ATCC 15692 / PAO1 / 1C / PRS 101 / LMG 12228) GN=rplP PE=3 SV=1	1	1	1	1	6.6	6.6	6.6	15.401	137	137	0.0095238	5.6334	1017800	1				59	229	TRUE	239	407	856	856
sp|Q9HWE5|RL14_PSEAE	sp|Q9HWE5|RL14_PSEAE	2	2	2	>sp|Q9HWE5|RL14_PSEAE 50S ribosomal protein L14 OS=Pseudomonas aeruginosa (strain ATCC 15692 / PAO1 / 1C / PRS 101 / LMG 12228) GN=rplN PE=3 SV=1	1	2	2	2	17.2	17.2	17.2	13.412	122	122	0	10.964	4940000	1				60	106;390	True;True	112;408	183;184;776	370;371;1672	370;1672
sp|Q9HWE8|RS14_PSEAE	sp|Q9HWE8|RS14_PSEAE	1	1	1	>sp|Q9HWE8|RS14_PSEAE 30S ribosomal protein S14 OS=Pseudomonas aeruginosa (strain ATCC 15692 / PAO1 / 1C / PRS 101 / LMG 12228) GN=rpsN PE=3 SV=1	1	1	1	1	12.9	12.9	12.9	11.565	101	101	0	7.3181	1154000	2				61	21	TRUE	23	40;41	116;117	117
sp|Q9HWF1|RL18_PSEAE	sp|Q9HWF1|RL18_PSEAE	1	1	1	>sp|Q9HWF1|RL18_PSEAE 50S ribosomal protein L18 OS=Pseudomonas aeruginosa (strain ATCC 15692 / PAO1 / 1C / PRS 101 / LMG 12228) GN=rplR PE=3 SV=1	1	1	1	1	9.5	9.5	9.5	12.661	116	116	0	6.6788	931800	1				62	0	TRUE	0	0	0	0
sp|Q9HWF2|RS5_PSEAE	sp|Q9HWF2|RS5_PSEAE	1	1	1	>sp|Q9HWF2|RS5_PSEAE 30S ribosomal protein S5 OS=Pseudomonas aeruginosa (strain ATCC 15692 / PAO1 / 1C / PRS 101 / LMG 12228) GN=rpsE PE=3 SV=1	1	1	1	1	8.4	8.4	8.4	17.625	166	166	0	9.5665	5030000	3				63	61	TRUE	66	109;110	237;238;239	237
sp|Q9HXZ4|PYRG_PSEAE	sp|Q9HXZ4|PYRG_PSEAE	2	2	2	>sp|Q9HXZ4|PYRG_PSEAE CTP synthase OS=Pseudomonas aeruginosa (strain ATCC 15692 / PAO1 / 1C / PRS 101 / LMG 12228) GN=pyrG PE=3 SV=1	1	2	2	2	5	5	5	59.617	542	542	0	11.066	883230	1				64	125;329	True;True	131;344	214;667	410;1463	410;1463
sp|Q9HYR9|CLPP2_PSEAE	sp|Q9HYR9|CLPP2_PSEAE	1	1	1	>sp|Q9HYR9|CLPP2_PSEAE ATP-dependent Clp protease proteolytic subunit 2 OS=Pseudomonas aeruginosa (strain ATCC 15692 / PAO1 / 1C / PRS 101 / LMG 12228) GN=clpP2 PE=3 SV=1	1	1	1	1	6	6	6	22.142	201	201	0	8.4346	450960	1				65	154	TRUE	161	265	513	513
sp|Q9HZ71|RS1_PSEAE	sp|Q9HZ71|RS1_PSEAE	3	3	3	>sp|Q9HZ71|RS1_PSEAE 30S ribosomal protein S1 OS=Pseudomonas aeruginosa (strain ATCC 15692 / PAO1 / 1C / PRS 101 / LMG 12228) GN=rpsA PE=3 SV=1	1	3	3	3	7.7	7.7	7.7	61.869	559	559	0	33.083	11288000	6				66	12;84;114	True;True;True	12;90;120	23;24;150;151;197	65;66;324;325;326;386	65;325;386
sp|Q9HZE0|DHE2_PSEAE	sp|Q9HZE0|DHE2_PSEAE	10	10	10	>sp|Q9HZE0|DHE2_PSEAE NAD-specific glutamate dehydrogenase OS=Pseudomonas aeruginosa (strain ATCC 15692 / PAO1 / 1C / PRS 101 / LMG 12228) GN=gdhB PE=1 SV=1	1	10	10	10	9.3	9.3	9.3	182.64	1620	1620	0	88.589	20831000	23				67	22;46;68;95;189;202;223;245;254;323	True;True;True;True;True;True;True;True;True;True	24;50;73;101;198;211;233;255;266;338	42;87;88;119;120;165;338;339;363;400;432;452;659	118;205;206;207;208;252;253;254;255;256;257;258;259;260;343;730;731;783;846;896;897;948;1455	118;205;256;343;730;783;846;896;948;1455
sp|Q9HZJ3|FADA_PSEAE	sp|Q9HZJ3|FADA_PSEAE	1	1	1	>sp|Q9HZJ3|FADA_PSEAE 3-ketoacyl-CoA thiolase OS=Pseudomonas aeruginosa (strain ATCC 15692 / PAO1 / 1C / PRS 101 / LMG 12228) GN=fadA PE=3 SV=1	1	1	1	1	3.3	3.3	3.3	41.643	391	391	0.0097087	5.6686	1146700	0				68	47	TRUE	51	89	209	209
sp|Q9HZP6|ETFB_PSEAE	sp|Q9HZP6|ETFB_PSEAE	1	1	1	>sp|Q9HZP6|ETFB_PSEAE Electron transfer flavoprotein subunit beta OS=Pseudomonas aeruginosa (strain ATCC 15692 / PAO1 / 1C / PRS 101 / LMG 12228) GN=etfB PE=3 SV=1	1	1	1	1	4.8	4.8	4.8	26.376	249	249	0.0093458	5.6048	532540	1				69	340	TRUE	355	692	1518	1518
sp|Q9I0J6|NUOG_PSEAE	sp|Q9I0J6|NUOG_PSEAE	2	2	2	>sp|Q9I0J6|NUOG_PSEAE NADH-quinone oxidoreductase subunit G OS=Pseudomonas aeruginosa (strain ATCC 15692 / PAO1 / 1C / PRS 101 / LMG 12228) GN=nuoG PE=3 SV=1	1	2	2	2	2.9	2.9	2.9	98.999	905	905	0	14.796	3338400	2				70	30;232	True;True	32;242	55;411;412	137;860;861	137;861
sp|Q9I0K4|ACEA_PSEAE	sp|Q9I0K4|ACEA_PSEAE	8	8	8	>sp|Q9I0K4|ACEA_PSEAE Isocitrate lyase OS=Pseudomonas aeruginosa (strain ATCC 15692 / PAO1 / 1C / PRS 101 / LMG 12228) GN=PA2634 PE=1 SV=1	1	8	8	8	19.8	19.8	19.8	58.886	531	531	0	89.259	24671000	26				71	96;143;193;221;243;265;316;376	True;True;True;True;True;True;True;True	102;150;202;231;253;278;331;394	166;167;244;345;397;430;507;508;641;642;643;752	344;345;346;347;482;737;842;894;1133;1134;1135;1400;1401;1402;1403;1404;1405;1406;1407;1408;1409;1410;1411;1412;1413;1640	347;482;737;842;894;1133;1400;1640
sp|Q9I2V5|ACNB_PSEAE	sp|Q9I2V5|ACNB_PSEAE	8	8	8	>sp|Q9I2V5|ACNB_PSEAE Aconitate hydratase B OS=Pseudomonas aeruginosa (strain ATCC 15692 / PAO1 / 1C / PRS 101 / LMG 12228) GN=acnB PE=3 SV=1	1	8	8	8	12.1	12.1	12.1	93.627	869	869	0	68.276	27065000	11				72	8;72;170;199;228;255;309;326	True;True;True;True;True;True;True;True	8;77;179;208;238;267;324;341	15;16;125;126;309;355;356;406;453;454;627;662	54;55;265;266;267;687;750;751;855;949;950;1354;1458	54;265;687;750;855;949;1354;1458
sp|Q9I2W7|RRAAH_PSEAE	sp|Q9I2W7|RRAAH_PSEAE	1	1	1	>sp|Q9I2W7|RRAAH_PSEAE Putative 4-hydroxy-4-methyl-2-oxoglutarate aldolase OS=Pseudomonas aeruginosa (strain ATCC 15692 / PAO1 / 1C / PRS 101 / LMG 12228) GN=PA1772 PE=1 SV=1	1	1	1	1	6.2	6.2	6.2	17.404	162	162	0.0084746	5.4929	3530700	1				73	32	TRUE	34	58	140	140
sp|Q9I3C5|HTPG_PSEAE	sp|Q9I3C5|HTPG_PSEAE	1	1	1	>sp|Q9I3C5|HTPG_PSEAE Chaperone protein HtpG OS=Pseudomonas aeruginosa (strain ATCC 15692 / PAO1 / 1C / PRS 101 / LMG 12228) GN=htpG PE=3 SV=1	1	1	1	1	1.6	1.6	1.6	71.667	634	634	0	5.8562	359460	0				74	355	TRUE	372	718	1562	1562
sp|Q9I3D1|DLDH2_PSEAE	sp|Q9I3D1|DLDH2_PSEAE	7	7	7	>sp|Q9I3D1|DLDH2_PSEAE Dihydrolipoyl dehydrogenase OS=Pseudomonas aeruginosa (strain ATCC 15692 / PAO1 / 1C / PRS 101 / LMG 12228) GN=lpdG PE=3 SV=1	1	7	7	7	20.9	20.9	20.9	50.164	478	478	0	62.833	31107000	14				75	7;39;49;52;142;198;268	True;True;True;True;True;True;True	7;41;42;53;56;149;207;281	13;14;71;72;73;92;93;96;242;243;354;512	52;53;162;163;164;165;213;214;215;216;219;480;481;749;1139	52;164;213;219;481;749;1139	9	394
sp|Q9I3F5|ACNA_PSEAE	sp|Q9I3F5|ACNA_PSEAE	6	6	6	>sp|Q9I3F5|ACNA_PSEAE Aconitate hydratase A OS=Pseudomonas aeruginosa (strain ATCC 15692 / PAO1 / 1C / PRS 101 / LMG 12228) GN=acnA PE=3 SV=1	1	6	6	6	10.5	10.5	10.5	99.147	910	910	0	56.902	28971000	18				76	89;188;332;354;359;397	True;True;True;True;True;True	95;197;347;371;376;415	157;158;336;337;672;673;716;717;722;723;805;806	332;333;334;728;729;1469;1470;1471;1472;1559;1560;1561;1566;1567;1568;1770;1771;1772	333;728;1469;1560;1566;1772
sp|Q9I4W3|DAPA_PSEAE	sp|Q9I4W3|DAPA_PSEAE	1	1	1	>sp|Q9I4W3|DAPA_PSEAE 4-hydroxy-tetrahydrodipicolinate synthase OS=Pseudomonas aeruginosa (strain ATCC 15692 / PAO1 / 1C / PRS 101 / LMG 12228) GN=dapA PE=1 SV=1	1	1	1	1	4.1	4.1	4.1	31.449	292	292	0	6.4468	675620	1				77	132	TRUE	138	226	434	434
sp|Q9I576|HPPD_PSEAE	sp|Q9I576|HPPD_PSEAE	1	1	1	>sp|Q9I576|HPPD_PSEAE 4-hydroxyphenylpyruvate dioxygenase OS=Pseudomonas aeruginosa (strain ATCC 15692 / PAO1 / 1C / PRS 101 / LMG 12228) GN=hpd PE=3 SV=1	1	1	1	1	4.2	4.2	4.2	39.912	357	357	0	18.153	1435200	4				78	262	TRUE	275	501;502	1125;1126;1127;1128	1126
sp|Q9I617|BIOF_PSEAE	sp|Q9I617|BIOF_PSEAE	2	2	2	>sp|Q9I617|BIOF_PSEAE 8-amino-7-oxononanoate synthase OS=Pseudomonas aeruginosa (strain ATCC 15692 / PAO1 / 1C / PRS 101 / LMG 12228) GN=bioF PE=3 SV=1	1	2	2	2	7.2	7.2	7.2	42.237	401	401	0	11.382	6283000	2				79	51;288	True;True	55;301	95;545;546	218;1189;1190	218;1190
sp|Q9I685|SAHH_PSEAE	sp|Q9I685|SAHH_PSEAE	10	10	10	>sp|Q9I685|SAHH_PSEAE Adenosylhomocysteinase OS=Pseudomonas aeruginosa (strain ATCC 15692 / PAO1 / 1C / PRS 101 / LMG 12228) GN=ahcY PE=3 SV=1	1	10	10	10	28.1	28.1	28.1	51.399	469	469	0	69.604	33064000	13				80	97;121;158;167;178;241;293;331;365;388	True;True;True;True;True;True;True;True;True;True	103;127;166;176;187;251;306;346;382;406	168;207;208;272;288;320;427;428;553;671;732;773	348;398;399;400;401;528;529;551;552;701;891;892;1198;1468;1586;1669	348;400;528;552;701;891;1198;1468;1586;1669
sp|Q9I6M4|DAVT_PSEAE	sp|Q9I6M4|DAVT_PSEAE	1	1	1	>sp|Q9I6M4|DAVT_PSEAE 5-aminovalerate aminotransferase DavT OS=Pseudomonas aeruginosa (strain ATCC 15692 / PAO1 / 1C / PRS 101 / LMG 12228) GN=davT PE=1 SV=1	1	1	1	1	2.6	2.6	2.6	45.22	426	426	0.0087719	5.5617	1369300	0				81	348	TRUE	365	706	1541	1541
sp|Q9I6M5|DAVD_PSEAE	sp|Q9I6M5|DAVD_PSEAE	1	1	1	>sp|Q9I6M5|DAVD_PSEAE Glutarate-semialdehyde dehydrogenase DavD OS=Pseudomonas aeruginosa (strain ATCC 15692 / PAO1 / 1C / PRS 101 / LMG 12228) GN=davD PE=1 SV=1	1	1	1	1	3.1	3.1	3.1	51.622	483	483	0	9.4896	2188000	1				82	361	TRUE	378	728	1580	1580
sp|Q9I747|HCP1_PSEAE	sp|Q9I747|HCP1_PSEAE	2	2	2	>sp|Q9I747|HCP1_PSEAE Protein hcp1 OS=Pseudomonas aeruginosa (strain ATCC 15692 / PAO1 / 1C / PRS 101 / LMG 12228) GN=hcp1 PE=1 SV=1	1	2	2	2	16.7	16.7	16.7	17.414	162	162	0	11.586	1872200	1				83	102;364	True;True	108;381	177;731	359;1585	359;1585
sp|Q9S508|PHZB2_PSEAE	sp|Q9S508|PHZB2_PSEAE	3	3	1	>sp|Q9S508|PHZB2_PSEAE Phenazine biosynthesis protein PhzB 2 OS=Pseudomonas aeruginosa (strain ATCC 15692 / PAO1 / 1C / PRS 101 / LMG 12228) GN=phzB2 PE=1 SV=1	1	3	3	1	17.3	17.3	10.5	19.027	162	162	0	22.592	24346000	9				84	37;38;250	True;True;True	39;40;261	67;68;69;70;443;444	155;156;157;158;159;160;161;926;927;928	158;160;928
sp|Q9X4G0|HGD_PSEAE	sp|Q9X4G0|HGD_PSEAE	1	1	1	>sp|Q9X4G0|HGD_PSEAE Homogentisate 1,2-dioxygenase OS=Pseudomonas aeruginosa (strain ATCC 15692 / PAO1 / 1C / PRS 101 / LMG 12228) GN=hmgA PE=3 SV=2	1	1	1	1	2.1	2.1	2.1	47.841	432	432	0.0083333	5.4718	709870	0				85	339	TRUE	354	691	1517	1517
tr|G3XD80|G3XD80_PSEAE	tr|G3XD80|G3XD80_PSEAE	1	1	1	>tr|G3XD80|G3XD80_PSEAE Probable uroporphyrin-III c-methyltransferase OS=Pseudomonas aeruginosa (strain ATCC 15692 / PAO1 / 1C / PRS 101 / LMG 12228) GN=PA0510 PE=3 SV=1	1	1	1	1	6.1	6.1	6.1	29.654	279	279	0.0082645	5.4406	1017900	0				86	280	TRUE	293	532	1170	1170
tr|Q9HTD1|Q9HTD1_PSEAE	tr|Q9HTD1|Q9HTD1_PSEAE	29	29	29	>tr|Q9HTD1|Q9HTD1_PSEAE Probable transcarboxylase subunit OS=Pseudomonas aeruginosa (strain ATCC 15692 / PAO1 / 1C / PRS 101 / LMG 12228) GN=PA5435 PE=4 SV=1	1	29	29	29	55	55	55	66.095	607	607	0	268.47	650970000	203				87	4;6;40;41;45;66;77;83;110;118;136;138;139;150;155;181;249;282;294;295;321;362;372;373;374;392;393;394;395	True;True;True;True;True;True;True;True;True;True;True;True;True;True;True;True;True;True;True;True;True;True;True;True;True;True;True;True;True	4;6;43;44;45;49;71;82;83;89;116;124;142;144;145;146;157;162;163;190;259;260;295;307;308;309;336;379;389;390;391;392;410;411;412;413	8;9;11;12;74;75;76;77;85;86;117;135;136;137;138;146;147;148;149;191;192;203;204;230;231;234;235;236;237;238;257;258;266;267;268;325;326;439;440;441;442;535;536;537;538;554;555;556;557;558;559;655;656;729;742;743;744;745;746;747;748;749;750;792;793;794;795;796;797;798;799;800;801;802	35;36;37;38;39;41;42;43;44;45;46;47;48;49;50;51;166;167;168;169;170;171;172;173;201;202;203;204;250;284;285;286;287;288;289;290;291;292;307;308;309;310;311;312;313;314;315;316;317;318;319;320;321;322;323;378;379;380;394;395;440;441;442;443;444;445;446;447;448;455;456;457;458;459;460;461;462;463;464;465;466;467;468;469;470;471;472;473;474;475;476;500;501;514;515;516;517;518;519;520;521;522;523;710…	37;44;166;173;202;250;288;318;380;395;444;464;473;500;515;711;913;1179;1200;1206;1449;1582;1626;1636;1637;1748;1757;1764;1767	10;11;12;13;14;15;16	125;169;182;274;306;323;435
tr|Q9HTD9|Q9HTD9_PSEAE	tr|Q9HTD9|Q9HTD9_PSEAE	3	3	3	>tr|Q9HTD9|Q9HTD9_PSEAE Alcohol dehydrogenase OS=Pseudomonas aeruginosa (strain ATCC 15692 / PAO1 / 1C / PRS 101 / LMG 12228) GN=adhA PE=1 SV=1	1	3	3	3	8.5	8.5	8.5	35.911	342	342	0	16.948	5555400	2				88	5;153;367	True;True;True	5;160;384	10;264;735	40;512;1590	40;512;1590
tr|Q9HTP2|Q9HTP2_PSEAE	tr|Q9HTP2|Q9HTP2_PSEAE	2	2	2	>tr|Q9HTP2|Q9HTP2_PSEAE Probable aldehyde dehydrogenase OS=Pseudomonas aeruginosa (strain ATCC 15692 / PAO1 / 1C / PRS 101 / LMG 12228) GN=PA5312 PE=3 SV=1	1	2	2	2	4.4	4.4	4.4	53.143	497	497	0	11.31	3748000	2				89	111;148	True;True	117;155	193;253;254	381;382;496;497	381;496
tr|Q9HU07|Q9HU07_PSEAE	tr|Q9HU07|Q9HU07_PSEAE	1	1	1	>tr|Q9HU07|Q9HU07_PSEAE Uncharacterized protein OS=Pseudomonas aeruginosa (strain ATCC 15692 / PAO1 / 1C / PRS 101 / LMG 12228) GN=PA5182 PE=4 SV=1	1	1	1	1	37.2	37.2	37.2	14.115	137	137	0.008547	5.5014	18063000	3				90	317	TRUE	332	644;645	1414;1415;1416	1416
tr|Q9HV54|Q9HV54_PSEAE	tr|Q9HV54|Q9HV54_PSEAE	1	1	1	>tr|Q9HV54|Q9HV54_PSEAE Transcription termination/antitermination protein NusA OS=Pseudomonas aeruginosa (strain ATCC 15692 / PAO1 / 1C / PRS 101 / LMG 12228) GN=nusA PE=3 SV=1	1	1	1	1	4.1	4.1	4.1	54.658	493	493	0	9.8117	279690	1				91	141	TRUE	148	241	479	479
tr|Q9HW49|Q9HW49_PSEAE	tr|Q9HW49|Q9HW49_PSEAE	6	6	6	>tr|Q9HW49|Q9HW49_PSEAE Uncharacterized protein OS=Pseudomonas aeruginosa (strain ATCC 15692 / PAO1 / 1C / PRS 101 / LMG 12228) GN=PA4352 PE=3 SV=1	1	6	6	6	37.4	37.4	37.4	30.972	286	286	0	50.455	26462000	18				92	62;186;338;342;343;358	True;True;True;True;True;True	67;195;353;358;359;360;375	111;112;333;334;690;696;697;698;699;721	240;241;242;243;244;724;725;726;1516;1526;1527;1528;1529;1530;1531;1532;1533;1534;1565	240;726;1516;1527;1531;1565	17	100
tr|Q9HWV0|Q9HWV0_PSEAE	tr|Q9HWV0|Q9HWV0_PSEAE	1	1	1	>tr|Q9HWV0|Q9HWV0_PSEAE Probable nonribosomal peptide synthetase OS=Pseudomonas aeruginosa (strain ATCC 15692 / PAO1 / 1C / PRS 101 / LMG 12228) GN=PA4078 PE=4 SV=1	1	1	1	1	1.8	1.8	1.8	110.35	991	991	0	7.0912	544150	1				93	91	TRUE	97	160	336	336
tr|Q9HXR8|Q9HXR8_PSEAE	tr|Q9HXR8|Q9HXR8_PSEAE	1	1	1	>tr|Q9HXR8|Q9HXR8_PSEAE Probable FMN oxidoreductase OS=Pseudomonas aeruginosa (strain ATCC 15692 / PAO1 / 1C / PRS 101 / LMG 12228) GN=PA3723 PE=4 SV=1	1	1	1	1	3	3	3	40.318	368	368	0	6.2496	1317300	0				94	320	TRUE	335	654	1448	1448
tr|Q9HXU8|Q9HXU8_PSEAE	tr|Q9HXU8|Q9HXU8_PSEAE	1	1	1	>tr|Q9HXU8|Q9HXU8_PSEAE Lipotoxon F, LptF OS=Pseudomonas aeruginosa (strain ATCC 15692 / PAO1 / 1C / PRS 101 / LMG 12228) GN=lptF PE=3 SV=1	1	1	1	1	5	5	5	28.514	261	261	0	11.756	298890	2				95	259	TRUE	272	465;466	978;979	978
tr|Q9HY13|Q9HY13_PSEAE	tr|Q9HY13|Q9HY13_PSEAE	2	2	2	>tr|Q9HY13|Q9HY13_PSEAE Uncharacterized protein OS=Pseudomonas aeruginosa (strain ATCC 15692 / PAO1 / 1C / PRS 101 / LMG 12228) GN=PA3613 PE=4 SV=1	1	2	2	2	3.2	3.2	3.2	88.378	801	801	0	11.492	919060	2				96	314;345	True;True	329;362	639;702	1397;1537	1397;1537
tr|Q9HY81|Q9HY81_PSEAE	tr|Q9HY81|Q9HY81_PSEAE	3	3	3	>tr|Q9HY81|Q9HY81_PSEAE Probable peroxidase OS=Pseudomonas aeruginosa (strain ATCC 15692 / PAO1 / 1C / PRS 101 / LMG 12228) GN=PA3529 PE=1 SV=1	1	3	3	3	15.5	15.5	15.5	21.822	200	200	0	31.22	39174000	14				97	65;270;304	True;True;True	70;283;319	115;116;515;516;517;575;576	247;248;249;1146;1147;1148;1149;1272;1273;1274;1275;1276;1277;1278	247;1148;1272
tr|Q9HYT5|Q9HYT5_PSEAE	tr|Q9HYT5|Q9HYT5_PSEAE	5	5	5	>tr|Q9HYT5|Q9HYT5_PSEAE Uncharacterized protein OS=Pseudomonas aeruginosa (strain ATCC 15692 / PAO1 / 1C / PRS 101 / LMG 12228) GN=PA3309 PE=3 SV=1	1	5	5	5	39.7	39.7	39.7	16.496	151	151	0	41.374	82301000	19				98	146;166;220;334;349	True;True;True;True;True	153;175;229;230;349;366	250;251;286;287;393;394;395;396;676;707;708	493;494;549;550;832;833;834;835;836;837;838;839;840;841;1476;1542;1543;1544;1545;1546;1547	493;550;838;1476;1546	18	129
tr|Q9HYZ6|Q9HYZ6_PSEAE	tr|Q9HYZ6|Q9HYZ6_PSEAE	1	1	1	>tr|Q9HYZ6|Q9HYZ6_PSEAE Site-determining protein OS=Pseudomonas aeruginosa (strain ATCC 15692 / PAO1 / 1C / PRS 101 / LMG 12228) GN=minD PE=3 SV=1	1	1	1	1	4.8	4.8	4.8	29.635	271	271	0.0098039	5.7289	1064800	1				99	216	TRUE	225	386	823	823
tr|Q9HZK4|Q9HZK4_PSEAE	tr|Q9HZK4|Q9HZK4_PSEAE	3	3	3	>tr|Q9HZK4|Q9HZK4_PSEAE Glyceraldehyde-3-phosphate dehydrogenase OS=Pseudomonas aeruginosa (strain ATCC 15692 / PAO1 / 1C / PRS 101 / LMG 12228) GN=PA3001 PE=3 SV=1	1	3	3	3	9.5	9.5	9.5	50.111	461	461	0	44.461	14605000	4				100	87;291;368	True;True;True	93;304;385	155;550;551;736;737	330;1195;1196;1591;1592	330;1195;1591
tr|Q9I028|Q9I028_PSEAE	tr|Q9I028|Q9I028_PSEAE	1	1	1	>tr|Q9I028|Q9I028_PSEAE Probable acyl-CoA dehydrogenase OS=Pseudomonas aeruginosa (strain ATCC 15692 / PAO1 / 1C / PRS 101 / LMG 12228) GN=PA2815 PE=4 SV=1	1	1	1	1	4.2	4.2	4.2	88.762	815	815	0	6.0139	8272700	2				101	371	TRUE	388	741	1606;1607	1606
tr|Q9I0L5|Q9I0L5_PSEAE	tr|Q9I0L5|Q9I0L5_PSEAE	6	6	6	>tr|Q9I0L5|Q9I0L5_PSEAE Isocitrate dehydrogenase [NADP] OS=Pseudomonas aeruginosa (strain ATCC 15692 / PAO1 / 1C / PRS 101 / LMG 12228) GN=icd PE=3 SV=1	1	6	6	6	19.6	19.6	19.6	45.577	418	418	0	56.07	21962000	11				102	36;134;147;273;363;386	True;True;True;True;True;True	38;140;154;286;380;404	65;66;228;252;521;522;730;770;771	153;154;436;437;438;495;1154;1155;1583;1584;1666;1667	153;437;495;1155;1584;1667
tr|Q9I0T1|Q9I0T1_PSEAE	tr|Q9I0T1|Q9I0T1_PSEAE	4	4	4	>tr|Q9I0T1|Q9I0T1_PSEAE Probable acyl-CoA thiolase OS=Pseudomonas aeruginosa (strain ATCC 15692 / PAO1 / 1C / PRS 101 / LMG 12228) GN=PA2553 PE=3 SV=1	1	4	4	4	14.1	14.1	14.1	41.4	396	396	0	38.902	12398000	4				103	81;86;113;176	True;True;True;True	87;92;119;185	143;154;195;196;317	303;329;384;385;696;697	303;329;384;697
tr|Q9I0Z9|Q9I0Z9_PSEAE	tr|Q9I0Z9|Q9I0Z9_PSEAE	1	1	1	>tr|Q9I0Z9|Q9I0Z9_PSEAE Uncharacterized protein OS=Pseudomonas aeruginosa (strain ATCC 15692 / PAO1 / 1C / PRS 101 / LMG 12228) GN=PA2483 PE=4 SV=1	1	1	1	1	5.1	5.1	5.1	36.102	333	333	0.0091743	5.59	2640900	0				104	327	TRUE	342	663;664	1459;1460	1459
tr|Q9I1E7|Q9I1E7_PSEAE	tr|Q9I1E7|Q9I1E7_PSEAE	3	3	3	>tr|Q9I1E7|Q9I1E7_PSEAE Alkyl hydroperoxide reductase AhpD OS=Pseudomonas aeruginosa (strain ATCC 15692 / PAO1 / 1C / PRS 101 / LMG 12228) GN=PA2331 PE=3 SV=1	1	3	3	3	17.7	17.7	17.7	19.904	186	186	0	17.162	5348300	3				105	116;227;325	True;True;True	122;237;340	200;405;661	389;854;1457	389;854;1457
tr|Q9I1E8|Q9I1E8_PSEAE	tr|Q9I1E8|Q9I1E8_PSEAE	1	1	1	>tr|Q9I1E8|Q9I1E8_PSEAE Uncharacterized protein OS=Pseudomonas aeruginosa (strain ATCC 15692 / PAO1 / 1C / PRS 101 / LMG 12228) GN=PA2330 PE=4 SV=1	1	1	1	1	3.9	3.9	3.9	37.68	355	355	0	6.0744	893210	1				106	203	TRUE	212	364	784	784
tr|Q9I246|Q9I246_PSEAE	tr|Q9I246|Q9I246_PSEAE	7	7	7	>tr|Q9I246|Q9I246_PSEAE Probable carbamoyl transferase OS=Pseudomonas aeruginosa (strain ATCC 15692 / PAO1 / 1C / PRS 101 / LMG 12228) GN=PA2069 PE=4 SV=1	1	7	7	7	17.1	17.1	17.1	63.382	574	574	0	58.71	24723000	14				107	71;172;217;278;290;298;301	True;True;True;True;True;True;True	76;181;226;291;303;312;315	124;312;313;387;388;529;530;548;549;563;564;568	264;690;691;692;824;825;1165;1166;1167;1168;1193;1194;1219;1220;1225	264;690;825;1166;1194;1219;1225
tr|Q9I299|Q9I299_PSEAE	tr|Q9I299|Q9I299_PSEAE	11	11	11	>tr|Q9I299|Q9I299_PSEAE Methylcrotonyl-CoA carboxylase, alpha-subunit (Biotin-containing) OS=Pseudomonas aeruginosa (strain ATCC 15692 / PAO1 / 1C / PRS 101 / LMG 12228) GN=liuD PE=1 SV=1	1	11	11	11	26.1	26.1	26.1	71.282	655	655	0	91.295	51805000	21				108	28;33;82;157;159;165;194;214;244;324;381	True;True;True;True;True;True;True;True;True;True;True	30;35;88;165;167;174;203;223;254;339;399	52;53;59;144;145;270;271;273;284;285;346;347;348;384;431;660;762;763	132;133;134;135;141;304;305;306;526;527;530;531;547;548;738;739;740;821;895;1456;1653;1654;1655	132;141;304;526;530;548;738;821;895;1456;1654
tr|Q9I2A9|Q9I2A9_PSEAE	tr|Q9I2A9|Q9I2A9_PSEAE	1	1	1	>tr|Q9I2A9|Q9I2A9_PSEAE DhcB, dehydrocarnitine CoA transferase, subunit B OS=Pseudomonas aeruginosa (strain ATCC 15692 / PAO1 / 1C / PRS 101 / LMG 12228) GN=dhcB PE=4 SV=1	1	1	1	1	11	11	11	23.187	218	218	0	7.9156	796490	1				109	131	TRUE	137	225	433	433
tr|Q9I3B2|Q9I3B2_PSEAE	tr|Q9I3B2|Q9I3B2_PSEAE	1	1	1	>tr|Q9I3B2|Q9I3B2_PSEAE Beta-ketoacyl-ACP synthase I OS=Pseudomonas aeruginosa (strain ATCC 15692 / PAO1 / 1C / PRS 101 / LMG 12228) GN=fabB PE=3 SV=1	1	1	1	1	3.2	3.2	3.2	42.806	405	405	0	6.2891	0	1				110	78	TRUE	84	139	293	293
tr|Q9I3D3|Q9I3D3_PSEAE	tr|Q9I3D3|Q9I3D3_PSEAE	5	5	5	>tr|Q9I3D3|Q9I3D3_PSEAE 2-oxoglutarate dehydrogenase (E1 subunit) OS=Pseudomonas aeruginosa (strain ATCC 15692 / PAO1 / 1C / PRS 101 / LMG 12228) GN=sucA PE=4 SV=1	1	5	5	5	8.2	8.2	8.2	105.88	943	943	0	35.915	18169000	13				111	130;225;226;247;251	True;True;True;True;True	136;235;236;257;262	223;224;402;403;404;435;436;445;446	431;432;848;849;850;851;852;853;900;901;902;929;930;931	431;848;849;901;929
tr|Q9I3D4|Q9I3D4_PSEAE	tr|Q9I3D4|Q9I3D4_PSEAE	4	4	4	>tr|Q9I3D4|Q9I3D4_PSEAE Succinate dehydrogenase (B subunit) OS=Pseudomonas aeruginosa (strain ATCC 15692 / PAO1 / 1C / PRS 101 / LMG 12228) GN=sdhB PE=4 SV=1	1	4	4	4	22.6	22.6	22.6	26.155	235	235	0	28.361	7417500	6				112	109;192;240;352	True;True;True;True	115;201;250;369	189;190;343;344;426;711	376;377;735;736;890;1551	377;735;890;1551
tr|Q9I3D5|Q9I3D5_PSEAE	tr|Q9I3D5|Q9I3D5_PSEAE	5	5	5	>tr|Q9I3D5|Q9I3D5_PSEAE Succinate dehydrogenase flavoprotein subunit OS=Pseudomonas aeruginosa (strain ATCC 15692 / PAO1 / 1C / PRS 101 / LMG 12228) GN=sdhA PE=3 SV=1	1	5	5	5	10.2	10.2	10.2	63.531	590	590	0	48.346	21938000	18				113	119;124;151;152;204	True;True;True;True;True	125;130;158;159;213	205;212;213;259;260;261;262;263;365	396;406;407;408;409;502;503;504;505;506;507;508;509;510;511;785;786;787;788	396;406;502;509;785
tr|Q9I5B2|Q9I5B2_PSEAE	tr|Q9I5B2|Q9I5B2_PSEAE	2	2	2	>tr|Q9I5B2|Q9I5B2_PSEAE Uncharacterized protein OS=Pseudomonas aeruginosa (strain ATCC 15692 / PAO1 / 1C / PRS 101 / LMG 12228) GN=PA0827 PE=4 SV=1	1	2	2	2	7.5	7.5	7.5	33.197	292	292	0	10.787	410800	1				114	212;286	True;True	221;299	380;543	815;1187	815;1187
tr|Q9I5E3|Q9I5E3_PSEAE	tr|Q9I5E3|Q9I5E3_PSEAE	1	1	1	>tr|Q9I5E3|Q9I5E3_PSEAE Citrate synthase OS=Pseudomonas aeruginosa (strain ATCC 15692 / PAO1 / 1C / PRS 101 / LMG 12228) GN=prpC PE=3 SV=1	1	1	1	1	3.7	3.7	3.7	41.689	375	375	0	8.2152	788910	1				115	161	TRUE	169	276	534	534
tr|Q9I5U9|Q9I5U9_PSEAE	tr|Q9I5U9|Q9I5U9_PSEAE	7	7	7	>tr|Q9I5U9|Q9I5U9_PSEAE Uncharacterized protein OS=Pseudomonas aeruginosa (strain ATCC 15692 / PAO1 / 1C / PRS 101 / LMG 12228) GN=PA0588 PE=4 SV=1	1	7	7	7	12.5	12.5	12.5	73.722	640	640	0	55.94	35195000	16				116	44;213;218;222;246;264;384	True;True;True;True;True;True;True	48;222;227;232;256;277;402	84;381;382;383;389;390;398;399;433;434;505;506;767	200;816;817;818;819;820;826;827;843;844;845;898;899;1131;1132;1661	200;818;826;843;898;1131;1661
tr|Q9I659|Q9I659_PSEAE	tr|Q9I659|Q9I659_PSEAE	5	5	3	>tr|Q9I659|Q9I659_PSEAE Probable ClpA/B protease ATP binding subunit OS=Pseudomonas aeruginosa (strain ATCC 15692 / PAO1 / 1C / PRS 101 / LMG 12228) GN=PA0459 PE=4 SV=1	1	5	5	3	6.9	6.9	4.2	94.174	850	850	0	32.08	3724500	6				117	19;261;272;312;336	True;True;True;True;True	20;274;285;327;351	36;499;500;520;636;687	106;1123;1124;1153;1394;1512	106;1124;1153;1394;1512
tr|Q9I689|Q9I689_PSEAE	tr|Q9I689|Q9I689_PSEAE	1	1	1	>tr|Q9I689|Q9I689_PSEAE ATP-dependent RNA helicase RhlE OS=Pseudomonas aeruginosa (strain ATCC 15692 / PAO1 / 1C / PRS 101 / LMG 12228) GN=rhlE PE=3 SV=1	1	1	1	1	2.5	2.5	2.5	70.111	639	639	0	9.6037	263250	1				118	60	TRUE	65	108	236	236
tr|Q9I6A0|Q9I6A0_PSEAE	tr|Q9I6A0|Q9I6A0_PSEAE	1	1	1	>tr|Q9I6A0|Q9I6A0_PSEAE Probable cystathionine gamma-lyase OS=Pseudomonas aeruginosa (strain ATCC 15692 / PAO1 / 1C / PRS 101 / LMG 12228) GN=PA0400 PE=3 SV=1	1	1	1	1	5.3	5.3	5.3	42.786	394	394	0	5.8986	330410	0				119	234	TRUE	244	415	870	870
tr|Q9I6H5|Q9I6H5_PSEAE	tr|Q9I6H5|Q9I6H5_PSEAE	2	2	2	>tr|Q9I6H5|Q9I6H5_PSEAE D-3-phosphoglycerate dehydrogenase OS=Pseudomonas aeruginosa (strain ATCC 15692 / PAO1 / 1C / PRS 101 / LMG 12228) GN=serA PE=3 SV=1	1	2	2	2	6.4	6.4	6.4	44.216	409	409	0	16.049	2742500	3				120	1;306	True;True	1;321	1;623;624	1;1349;1350	1;1349
tr|Q9I6J2|Q9I6J2_PSEAE	tr|Q9I6J2|Q9I6J2_PSEAE	1	1	1	>tr|Q9I6J2|Q9I6J2_PSEAE Putrescine aminotransferase OS=Pseudomonas aeruginosa (strain ATCC 15692 / PAO1 / 1C / PRS 101 / LMG 12228) GN=spuC PE=3 SV=1	1	1	1	1	3.1	3.1	3.1	50.452	456	456	0.0084034	5.4743	1847700	0				121	387	TRUE	405	772	1668	1668
tr|Q9I6Z3|Q9I6Z3_PSEAE	tr|Q9I6Z3|Q9I6Z3_PSEAE	6	6	6	>tr|Q9I6Z3|Q9I6Z3_PSEAE Alkyl hydroperoxide reductase subunit C OS=Pseudomonas aeruginosa (strain ATCC 15692 / PAO1 / 1C / PRS 101 / LMG 12228) GN=ahpC PE=4 SV=1	1	6	6	6	45.5	45.5	45.5	20.541	187	187	0	48.123	46073000	19				122	48;108;137;302;322;330	True;True;True;True;True;True	52;114;143;316;337;345	90;91;187;188;232;233;569;570;657;658;668;669;670	210;211;212;374;375;449;450;451;452;453;454;1226;1227;1453;1454;1464;1465;1466;1467	212;374;449;1227;1453;1467

## Sheet: 6-2 Sheet1
Protein IDs-C4HSL (full)
sp|O52759|RS4_PSEAE
sp|O52762|CATA_PSEAE
sp|O68822|AMPA_PSEAE
sp|Q9S508|PHZB2_PSEAE;sp|O69753|PHZB1_PSEAE
sp|P04739|FMPO_PSEAE
sp|P05384|DBHB_PSEAE
sp|P08308|OTCC_PSEAE
sp|P09591|EFTU_PSEAE
sp|P13794|PORF_PSEAE
sp|P13981|ARCA_PSEAE
sp|P30718|CH60_PSEAE
sp|P37799|BCCP_PSEAE
sp|P43336|PHHC_PSEAE
sp|P47204|FTSZ_PSEAE
sp|P53593|SUCC_PSEAE
sp|P53641|SODF_PSEAE
sp|Q51561|RPOB_PSEAE
sp|Q52463|ALG8_PSEAE
sp|Q59637|ODP1_PSEAE
sp|Q9HT18|ATPA_PSEAE
sp|Q9HT20|ATPB_PSEAE
sp|Q9HTN8|RL28_PSEAE
sp|Q9HU65|GLNA_PSEAE
sp|Q9HVA2|ILVC_PSEAE
sp|Q9HVY3|RS9_PSEAE
sp|Q9HWC9|RPOC_PSEAE
sp|Q9HWD2|EFG1_PSEAE;sp|Q9I244|EFG2_PSEAE
sp|Q9HWD5|RL3_PSEAE
sp|Q9HWD8|RL2_PSEAE
sp|Q9HWE2|RL16_PSEAE
sp|Q9HZ71|RS1_PSEAE
sp|Q9HZE0|DHE2_PSEAE
sp|Q9HZJ2|FADB_PSEAE
sp|Q9I0K4|ACEA_PSEAE
sp|Q9I2V5|ACNB_PSEAE
sp|Q9I3D1|DLDH2_PSEAE
sp|Q9I3F5|ACNA_PSEAE
sp|Q9I576|HPPD_PSEAE
sp|Q9I685|SAHH_PSEAE
sp|Q9I6M5|DAVD_PSEAE
sp|Q9I742|CLPV1_PSEAE
tr|Q9HTD1|Q9HTD1_PSEAE
tr|Q9HTP2|Q9HTP2_PSEAE
tr|Q9HU07|Q9HU07_PSEAE
tr|Q9HW49|Q9HW49_PSEAE
tr|Q9HWV0|Q9HWV0_PSEAE
tr|Q9HY13|Q9HY13_PSEAE
tr|Q9HY81|Q9HY81_PSEAE
tr|Q9HYK2|Q9HYK2_PSEAE
tr|Q9HYT5|Q9HYT5_PSEAE
tr|Q9HZG4|Q9HZG4_PSEAE
tr|Q9I0L5|Q9I0L5_PSEAE
tr|Q9I0T1|Q9I0T1_PSEAE
tr|Q9I1E8|Q9I1E8_PSEAE
tr|Q9I246|Q9I246_PSEAE
tr|Q9I250|Q9I250_PSEAE
tr|Q9I299|Q9I299_PSEAE
tr|Q9I2A9|Q9I2A9_PSEAE
tr|Q9I2N7|Q9I2N7_PSEAE
tr|Q9I3D3|Q9I3D3_PSEAE
tr|Q9I3D4|Q9I3D4_PSEAE
tr|Q9I3D5|Q9I3D5_PSEAE
tr|Q9I3V8|Q9I3V8_PSEAE
tr|Q9I5I0|Q9I5I0_PSEAE
tr|Q9I5U9|Q9I5U9_PSEAE
tr|Q9I6Z3|Q9I6Z3_PSEAE
Probe 12 (subtracted)
REV__tr|Q9HXW2|Q9HXW2_PSEAE
sp|G3XD23|WBPB_PSEAE
sp|O69753|PHZB1_PSEAE
sp|O69754|PHZF_PSEAE
sp|O82851|EFTS_PSEAE
sp|O86428|ILVE_PSEAE
sp|P11221|OPRI_PSEAE
sp|P13982|ARCC_PSEAE
sp|P15276|ALGP_PSEAE
sp|P28810|MMSA_PSEAE
sp|P37798|ACCC_PSEAE
sp|P57668|TPX_PSEAE
sp|P72173|AAT_PSEAE
sp|Q51567|SUCD_PSEAE
sp|Q59636|NDK_PSEAE
sp|Q9HT16|ATPF_PSEAE
sp|Q9HTD7|ASPA_PSEAE
sp|Q9HU21|RMLC_PSEAE
sp|Q9HU83|HUTU_PSEAE
sp|Q9HUC0|UBIE_PSEAE
sp|Q9HUM0|HFQ_PSEAE
sp|Q9HUM6|PURA_PSEAE
sp|Q9HVT2|Y4489_PSEAE
sp|Q9HW11|Y4395_PSEAE
sp|Q9HWC8|RL7_PSEAE
sp|Q9HWD1|RS7_PSEAE
sp|Q9HWE1|RS3_PSEAE
sp|Q9HWE5|RL14_PSEAE
sp|Q9HWE8|RS14_PSEAE
sp|Q9HWF1|RL18_PSEAE
sp|Q9HWF2|RS5_PSEAE
sp|Q9HXZ4|PYRG_PSEAE
sp|Q9HYR9|CLPP2_PSEAE
sp|Q9HZJ3|FADA_PSEAE
sp|Q9HZP6|ETFB_PSEAE
sp|Q9I0J6|NUOG_PSEAE
sp|Q9I2W7|RRAAH_PSEAE
sp|Q9I3C5|HTPG_PSEAE
sp|Q9I4W3|DAPA_PSEAE
sp|Q9I617|BIOF_PSEAE
sp|Q9I6M4|DAVT_PSEAE
sp|Q9I747|HCP1_PSEAE
sp|Q9S508|PHZB2_PSEAE
sp|Q9X4G0|HGD_PSEAE
tr|G3XD80|G3XD80_PSEAE
tr|Q9HTD9|Q9HTD9_PSEAE
tr|Q9HV54|Q9HV54_PSEAE
tr|Q9HXR8|Q9HXR8_PSEAE
tr|Q9HXU8|Q9HXU8_PSEAE
tr|Q9HYZ6|Q9HYZ6_PSEAE
tr|Q9HZK4|Q9HZK4_PSEAE
tr|Q9I028|Q9I028_PSEAE
tr|Q9I0Z9|Q9I0Z9_PSEAE
tr|Q9I1E7|Q9I1E7_PSEAE
tr|Q9I3B2|Q9I3B2_PSEAE
tr|Q9I5B2|Q9I5B2_PSEAE
tr|Q9I5E3|Q9I5E3_PSEAE
tr|Q9I659|Q9I659_PSEAE
tr|Q9I689|Q9I689_PSEAE
tr|Q9I6A0|Q9I6A0_PSEAE
tr|Q9I6H5|Q9I6H5_PSEAE
tr|Q9I6J2|Q9I6J2_PSEAE

## Sheet: 6-2 Sheet2
Protein IDs-Probe 12 (subtracted)	Protein IDs-Probe 12 (full)			Fasta headers	Number of proteins	Peptides	Razor + unique peptides
REV__tr|Q9HXW2|Q9HXW2_PSEAE	REV__tr|Q9HXW2|Q9HXW2_PSEAE			>tr|Q9HXW2|Q9HXW2_PSEAE Probable transcriptional regulator OS=Pseudomonas aeruginosa (strain ATCC 15692 / PAO1 / 1C / PRS 101 / LMG 12228) GN=PA3678 PE=4 SV=1	1	1	1
sp|G3XD23|WBPB_PSEAE	sp|G3XD23|WBPB_PSEAE			>sp|G3XD23|WBPB_PSEAE UDP-N-acetyl-2-amino-2-deoxy-D-glucuronate oxidase OS=Pseudomonas aeruginosa (strain ATCC 15692 / PAO1 / 1C / PRS 101 / LMG 12228) GN=wbpB PE=1 SV=1	1	1	1
sp|O69753|PHZB1_PSEAE	sp|O52759|RS4_PSEAE			>sp|O52759|RS4_PSEAE 30S ribosomal protein S4 OS=Pseudomonas aeruginosa (strain ATCC 15692 / PAO1 / 1C / PRS 101 / LMG 12228) GN=rpsD PE=3 SV=2	1	2	2
sp|O69754|PHZF_PSEAE	sp|O52762|CATA_PSEAE			>sp|O52762|CATA_PSEAE Catalase OS=Pseudomonas aeruginosa (strain ATCC 15692 / PAO1 / 1C / PRS 101 / LMG 12228) GN=katA PE=1 SV=1	1	5	5
sp|O82851|EFTS_PSEAE	sp|O68822|AMPA_PSEAE			>sp|O68822|AMPA_PSEAE Cytosol aminopeptidase OS=Pseudomonas aeruginosa (strain ATCC 15692 / PAO1 / 1C / PRS 101 / LMG 12228) GN=pepA PE=3 SV=1	1	9	9
sp|O86428|ILVE_PSEAE	sp|O69753|PHZB1_PSEAE			>sp|O69753|PHZB1_PSEAE Phenazine biosynthesis protein PhzB 1 OS=Pseudomonas aeruginosa (strain ATCC 15692 / PAO1 / 1C / PRS 101 / LMG 12228) GN=phzB1 PE=3 SV=1	1	3	1
sp|P11221|OPRI_PSEAE	sp|O69754|PHZF_PSEAE			>sp|O69754|PHZF_PSEAE Trans-2,3-dihydro-3-hydroxyanthranilate isomerase OS=Pseudomonas aeruginosa (strain ATCC 15692 / PAO1 / 1C / PRS 101 / LMG 12228) GN=phzF1 PE=3 SV=2	1	1	1
sp|P13982|ARCC_PSEAE	sp|O82851|EFTS_PSEAE			>sp|O82851|EFTS_PSEAE Elongation factor Ts OS=Pseudomonas aeruginosa (strain ATCC 15692 / PAO1 / 1C / PRS 101 / LMG 12228) GN=tsf PE=3 SV=1	1	1	1
sp|P15276|ALGP_PSEAE	sp|O86428|ILVE_PSEAE			>sp|O86428|ILVE_PSEAE Branched-chain-amino-acid aminotransferase OS=Pseudomonas aeruginosa (strain ATCC 15692 / PAO1 / 1C / PRS 101 / LMG 12228) GN=ilvE PE=1 SV=2	1	1	1
sp|P28810|MMSA_PSEAE	sp|P04739|FMPO_PSEAE			>sp|P04739|FMPO_PSEAE Fimbrial protein OS=Pseudomonas aeruginosa (strain ATCC 15692 / PAO1 / 1C / PRS 101 / LMG 12228) GN=pilA PE=1 SV=1	1	1	1
sp|P37798|ACCC_PSEAE	sp|P05384|DBHB_PSEAE			>sp|P05384|DBHB_PSEAE DNA-binding protein HU-beta OS=Pseudomonas aeruginosa (strain ATCC 15692 / PAO1 / 1C / PRS 101 / LMG 12228) GN=hupB PE=1 SV=3	1	3	3
sp|P57668|TPX_PSEAE	sp|P08308|OTCC_PSEAE			>sp|P08308|OTCC_PSEAE Ornithine carbamoyltransferase, catabolic OS=Pseudomonas aeruginosa (strain ATCC 15692 / PAO1 / 1C / PRS 101 / LMG 12228) GN=arcB PE=1 SV=3	1	8	8
sp|P72173|AAT_PSEAE	sp|P09591|EFTU_PSEAE			>sp|P09591|EFTU_PSEAE Elongation factor Tu OS=Pseudomonas aeruginosa (strain ATCC 15692 / PAO1 / 1C / PRS 101 / LMG 12228) GN=tufA PE=1 SV=2	1	10	10
sp|Q51567|SUCD_PSEAE	sp|P11221|OPRI_PSEAE			>sp|P11221|OPRI_PSEAE Major outer membrane lipoprotein OS=Pseudomonas aeruginosa (strain ATCC 15692 / PAO1 / 1C / PRS 101 / LMG 12228) GN=oprI PE=3 SV=1	1	1	1
sp|Q59636|NDK_PSEAE	sp|P13794|PORF_PSEAE			>sp|P13794|PORF_PSEAE Outer membrane porin F OS=Pseudomonas aeruginosa (strain ATCC 15692 / PAO1 / 1C / PRS 101 / LMG 12228) GN=oprF PE=1 SV=1	1	4	4
sp|Q9HT16|ATPF_PSEAE	sp|P13981|ARCA_PSEAE			>sp|P13981|ARCA_PSEAE Arginine deiminase OS=Pseudomonas aeruginosa (strain ATCC 15692 / PAO1 / 1C / PRS 101 / LMG 12228) GN=arcA PE=1 SV=2	1	15	15
sp|Q9HTD7|ASPA_PSEAE	sp|P13982|ARCC_PSEAE			>sp|P13982|ARCC_PSEAE Carbamate kinase OS=Pseudomonas aeruginosa (strain ATCC 15692 / PAO1 / 1C / PRS 101 / LMG 12228) GN=arcC PE=3 SV=1	1	2	2
sp|Q9HU21|RMLC_PSEAE	sp|P15276|ALGP_PSEAE			>sp|P15276|ALGP_PSEAE Transcriptional regulatory protein AlgP OS=Pseudomonas aeruginosa (strain ATCC 15692 / PAO1 / 1C / PRS 101 / LMG 12228) GN=algP PE=4 SV=2	1	1	1
sp|Q9HU83|HUTU_PSEAE	sp|P28810|MMSA_PSEAE			>sp|P28810|MMSA_PSEAE Methylmalonate-semialdehyde dehydrogenase [acylating] OS=Pseudomonas aeruginosa (strain ATCC 15692 / PAO1 / 1C / PRS 101 / LMG 12228) GN=mmsA PE=1 SV=2	1	1	1
sp|Q9HUC0|UBIE_PSEAE	sp|P30718|CH60_PSEAE			>sp|P30718|CH60_PSEAE 60 kDa chaperonin OS=Pseudomonas aeruginosa (strain ATCC 15692 / PAO1 / 1C / PRS 101 / LMG 12228) GN=groL PE=1 SV=3	1	19	19
sp|Q9HUM0|HFQ_PSEAE	sp|P37798|ACCC_PSEAE			>sp|P37798|ACCC_PSEAE Biotin carboxylase OS=Pseudomonas aeruginosa (strain ATCC 15692 / PAO1 / 1C / PRS 101 / LMG 12228) GN=accC PE=1 SV=1	1	1	1
sp|Q9HUM6|PURA_PSEAE	sp|P37799|BCCP_PSEAE			>sp|P37799|BCCP_PSEAE Biotin carboxyl carrier protein of acetyl-CoA carboxylase OS=Pseudomonas aeruginosa (strain ATCC 15692 / PAO1 / 1C / PRS 101 / LMG 12228) GN=accB PE=3 SV=1	1	8	8
sp|Q9HVT2|Y4489_PSEAE	sp|P43336|PHHC_PSEAE			>sp|P43336|PHHC_PSEAE Aromatic-amino-acid aminotransferase OS=Pseudomonas aeruginosa (strain ATCC 15692 / PAO1 / 1C / PRS 101 / LMG 12228) GN=phhC PE=3 SV=2	1	2	2
sp|Q9HW11|Y4395_PSEAE	sp|P47204|FTSZ_PSEAE			>sp|P47204|FTSZ_PSEAE Cell division protein FtsZ OS=Pseudomonas aeruginosa (strain ATCC 15692 / PAO1 / 1C / PRS 101 / LMG 12228) GN=ftsZ PE=1 SV=2	1	1	1
sp|Q9HWC8|RL7_PSEAE	sp|P53593|SUCC_PSEAE			>sp|P53593|SUCC_PSEAE Succinyl-CoA ligase [ADP-forming] subunit beta OS=Pseudomonas aeruginosa (strain ATCC 15692 / PAO1 / 1C / PRS 101 / LMG 12228) GN=sucC PE=3 SV=2	1	8	8
sp|Q9HWD1|RS7_PSEAE	sp|P53641|SODF_PSEAE			>sp|P53641|SODF_PSEAE Superoxide dismutase [Fe] OS=Pseudomonas aeruginosa (strain ATCC 15692 / PAO1 / 1C / PRS 101 / LMG 12228) GN=sodB PE=3 SV=3	1	1	1
sp|Q9HWE1|RS3_PSEAE	sp|P57668|TPX_PSEAE			>sp|P57668|TPX_PSEAE Probable thiol peroxidase OS=Pseudomonas aeruginosa (strain ATCC 15692 / PAO1 / 1C / PRS 101 / LMG 12228) GN=tpx PE=3 SV=1	1	1	1
sp|Q9HWE5|RL14_PSEAE	sp|P72173|AAT_PSEAE			>sp|P72173|AAT_PSEAE Aspartate aminotransferase OS=Pseudomonas aeruginosa (strain ATCC 15692 / PAO1 / 1C / PRS 101 / LMG 12228) GN=aspC PE=3 SV=2	1	1	1
sp|Q9HWE8|RS14_PSEAE	sp|Q51561|RPOB_PSEAE			>sp|Q51561|RPOB_PSEAE DNA-directed RNA polymerase subunit beta OS=Pseudomonas aeruginosa (strain ATCC 15692 / PAO1 / 1C / PRS 101 / LMG 12228) GN=rpoB PE=3 SV=2	1	4	4
sp|Q9HWF1|RL18_PSEAE	sp|Q51567|SUCD_PSEAE			>sp|Q51567|SUCD_PSEAE Succinyl-CoA ligase [ADP-forming] subunit alpha OS=Pseudomonas aeruginosa (strain ATCC 15692 / PAO1 / 1C / PRS 101 / LMG 12228) GN=sucD PE=3 SV=2	1	3	3
sp|Q9HWF2|RS5_PSEAE	sp|Q59636|NDK_PSEAE			>sp|Q59636|NDK_PSEAE Nucleoside diphosphate kinase OS=Pseudomonas aeruginosa (strain ATCC 15692 / PAO1 / 1C / PRS 101 / LMG 12228) GN=ndk PE=3 SV=2	1	1	1
sp|Q9HXZ4|PYRG_PSEAE	sp|Q59637|ODP1_PSEAE			>sp|Q59637|ODP1_PSEAE Pyruvate dehydrogenase E1 component OS=Pseudomonas aeruginosa (strain ATCC 15692 / PAO1 / 1C / PRS 101 / LMG 12228) GN=aceE PE=3 SV=2	1	6	6
sp|Q9HYR9|CLPP2_PSEAE	sp|Q9HT16|ATPF_PSEAE			>sp|Q9HT16|ATPF_PSEAE ATP synthase subunit b OS=Pseudomonas aeruginosa (strain ATCC 15692 / PAO1 / 1C / PRS 101 / LMG 12228) GN=atpF PE=3 SV=1	1	1	1
sp|Q9HZJ3|FADA_PSEAE	sp|Q9HT18|ATPA_PSEAE			>sp|Q9HT18|ATPA_PSEAE ATP synthase subunit alpha OS=Pseudomonas aeruginosa (strain ATCC 15692 / PAO1 / 1C / PRS 101 / LMG 12228) GN=atpA PE=3 SV=1	1	10	10
sp|Q9HZP6|ETFB_PSEAE	sp|Q9HT20|ATPB_PSEAE			>sp|Q9HT20|ATPB_PSEAE ATP synthase subunit beta OS=Pseudomonas aeruginosa (strain ATCC 15692 / PAO1 / 1C / PRS 101 / LMG 12228) GN=atpD PE=3 SV=1	1	4	4
sp|Q9I0J6|NUOG_PSEAE	sp|Q9HTD7|ASPA_PSEAE			>sp|Q9HTD7|ASPA_PSEAE Aspartate ammonia-lyase OS=Pseudomonas aeruginosa (strain ATCC 15692 / PAO1 / 1C / PRS 101 / LMG 12228) GN=aspA PE=3 SV=1	1	1	1
sp|Q9I2W7|RRAAH_PSEAE	sp|Q9HTN8|RL28_PSEAE			>sp|Q9HTN8|RL28_PSEAE 50S ribosomal protein L28 OS=Pseudomonas aeruginosa (strain ATCC 15692 / PAO1 / 1C / PRS 101 / LMG 12228) GN=rpmB PE=3 SV=1	1	1	1
sp|Q9I3C5|HTPG_PSEAE	sp|Q9HU21|RMLC_PSEAE			>sp|Q9HU21|RMLC_PSEAE dTDP-4-dehydrorhamnose 3,5-epimerase OS=Pseudomonas aeruginosa (strain ATCC 15692 / PAO1 / 1C / PRS 101 / LMG 12228) GN=rmlC PE=1 SV=1	1	1	1
sp|Q9I4W3|DAPA_PSEAE	sp|Q9HU65|GLNA_PSEAE			>sp|Q9HU65|GLNA_PSEAE Glutamine synthetase OS=Pseudomonas aeruginosa (strain ATCC 15692 / PAO1 / 1C / PRS 101 / LMG 12228) GN=glnA PE=1 SV=1	1	3	3
sp|Q9I617|BIOF_PSEAE	sp|Q9HU83|HUTU_PSEAE			>sp|Q9HU83|HUTU_PSEAE Urocanate hydratase OS=Pseudomonas aeruginosa (strain ATCC 15692 / PAO1 / 1C / PRS 101 / LMG 12228) GN=hutU PE=1 SV=1	1	1	1
sp|Q9I6M4|DAVT_PSEAE	sp|Q9HUC0|UBIE_PSEAE			>sp|Q9HUC0|UBIE_PSEAE Ubiquinone/menaquinone biosynthesis C-methyltransferase UbiE OS=Pseudomonas aeruginosa (strain ATCC 15692 / PAO1 / 1C / PRS 101 / LMG 12228) GN=ubiE PE=3 SV=1	1	1	1
sp|Q9I747|HCP1_PSEAE	sp|Q9HUM0|HFQ_PSEAE			>sp|Q9HUM0|HFQ_PSEAE RNA-binding protein Hfq OS=Pseudomonas aeruginosa (strain ATCC 15692 / PAO1 / 1C / PRS 101 / LMG 12228) GN=hfq PE=1 SV=1	1	1	1
sp|Q9S508|PHZB2_PSEAE	sp|Q9HUM6|PURA_PSEAE			>sp|Q9HUM6|PURA_PSEAE Adenylosuccinate synthetase OS=Pseudomonas aeruginosa (strain ATCC 15692 / PAO1 / 1C / PRS 101 / LMG 12228) GN=purA PE=3 SV=1	1	1	1
sp|Q9X4G0|HGD_PSEAE	sp|Q9HVA2|ILVC_PSEAE			>sp|Q9HVA2|ILVC_PSEAE Ketol-acid reductoisomerase OS=Pseudomonas aeruginosa (strain ATCC 15692 / PAO1 / 1C / PRS 101 / LMG 12228) GN=ilvC PE=1 SV=1	1	1	1
tr|G3XD80|G3XD80_PSEAE	sp|Q9HVT2|Y4489_PSEAE			>sp|Q9HVT2|Y4489_PSEAE UPF0192 protein PA4489 OS=Pseudomonas aeruginosa (strain ATCC 15692 / PAO1 / 1C / PRS 101 / LMG 12228) GN=PA4489 PE=3 SV=1	1	1	1
tr|Q9HTD9|Q9HTD9_PSEAE	sp|Q9HVY3|RS9_PSEAE			>sp|Q9HVY3|RS9_PSEAE 30S ribosomal protein S9 OS=Pseudomonas aeruginosa (strain ATCC 15692 / PAO1 / 1C / PRS 101 / LMG 12228) GN=rpsI PE=3 SV=1	1	1	1
tr|Q9HV54|Q9HV54_PSEAE	sp|Q9HW11|Y4395_PSEAE			>sp|Q9HW11|Y4395_PSEAE UPF0234 protein PA4395 OS=Pseudomonas aeruginosa (strain ATCC 15692 / PAO1 / 1C / PRS 101 / LMG 12228) GN=PA4395 PE=3 SV=1	1	1	1
tr|Q9HXR8|Q9HXR8_PSEAE	sp|Q9HWC8|RL7_PSEAE			>sp|Q9HWC8|RL7_PSEAE 50S ribosomal protein L7/L12 OS=Pseudomonas aeruginosa (strain ATCC 15692 / PAO1 / 1C / PRS 101 / LMG 12228) GN=rplL PE=3 SV=1	1	1	1
tr|Q9HXU8|Q9HXU8_PSEAE	sp|Q9HWC9|RPOC_PSEAE			>sp|Q9HWC9|RPOC_PSEAE DNA-directed RNA polymerase subunit beta OS=Pseudomonas aeruginosa (strain ATCC 15692 / PAO1 / 1C / PRS 101 / LMG 12228) GN=rpoC PE=3 SV=1	1	3	3
tr|Q9HYZ6|Q9HYZ6_PSEAE	sp|Q9HWD1|RS7_PSEAE			>sp|Q9HWD1|RS7_PSEAE 30S ribosomal protein S7 OS=Pseudomonas aeruginosa (strain ATCC 15692 / PAO1 / 1C / PRS 101 / LMG 12228) GN=rpsG PE=3 SV=1	1	2	2
tr|Q9HZK4|Q9HZK4_PSEAE	sp|Q9HWD2|EFG1_PSEAE;sp|Q9I244|EFG2_PSEAE			>sp|Q9HWD2|EFG1_PSEAE Elongation factor G 1 OS=Pseudomonas aeruginosa (strain ATCC 15692 / PAO1 / 1C / PRS 101 / LMG 12228) GN=fusA PE=1 SV=1;>sp|Q9I244|EFG2_PSEAE Elongation factor G 2 OS=Pseudomonas aeruginosa (strain ATCC 15692 / PAO1 / 1C / PRS 101 / L	2	9	9
tr|Q9I028|Q9I028_PSEAE	sp|Q9HWD5|RL3_PSEAE			>sp|Q9HWD5|RL3_PSEAE 50S ribosomal protein L3 OS=Pseudomonas aeruginosa (strain ATCC 15692 / PAO1 / 1C / PRS 101 / LMG 12228) GN=rplC PE=3 SV=1	1	2	2
tr|Q9I0Z9|Q9I0Z9_PSEAE	sp|Q9HWD8|RL2_PSEAE			>sp|Q9HWD8|RL2_PSEAE 50S ribosomal protein L2 OS=Pseudomonas aeruginosa (strain ATCC 15692 / PAO1 / 1C / PRS 101 / LMG 12228) GN=rplB PE=3 SV=1	1	2	2
tr|Q9I1E7|Q9I1E7_PSEAE	sp|Q9HWE1|RS3_PSEAE			>sp|Q9HWE1|RS3_PSEAE 30S ribosomal protein S3 OS=Pseudomonas aeruginosa (strain ATCC 15692 / PAO1 / 1C / PRS 101 / LMG 12228) GN=rpsC PE=3 SV=1	1	1	1
tr|Q9I3B2|Q9I3B2_PSEAE	sp|Q9HWE2|RL16_PSEAE			>sp|Q9HWE2|RL16_PSEAE 50S ribosomal protein L16 OS=Pseudomonas aeruginosa (strain ATCC 15692 / PAO1 / 1C / PRS 101 / LMG 12228) GN=rplP PE=3 SV=1	1	1	1
tr|Q9I5B2|Q9I5B2_PSEAE	sp|Q9HWE5|RL14_PSEAE			>sp|Q9HWE5|RL14_PSEAE 50S ribosomal protein L14 OS=Pseudomonas aeruginosa (strain ATCC 15692 / PAO1 / 1C / PRS 101 / LMG 12228) GN=rplN PE=3 SV=1	1	2	2
tr|Q9I5E3|Q9I5E3_PSEAE	sp|Q9HWE8|RS14_PSEAE			>sp|Q9HWE8|RS14_PSEAE 30S ribosomal protein S14 OS=Pseudomonas aeruginosa (strain ATCC 15692 / PAO1 / 1C / PRS 101 / LMG 12228) GN=rpsN PE=3 SV=1	1	1	1
tr|Q9I659|Q9I659_PSEAE	sp|Q9HWF1|RL18_PSEAE			>sp|Q9HWF1|RL18_PSEAE 50S ribosomal protein L18 OS=Pseudomonas aeruginosa (strain ATCC 15692 / PAO1 / 1C / PRS 101 / LMG 12228) GN=rplR PE=3 SV=1	1	1	1
tr|Q9I689|Q9I689_PSEAE	sp|Q9HWF2|RS5_PSEAE			>sp|Q9HWF2|RS5_PSEAE 30S ribosomal protein S5 OS=Pseudomonas aeruginosa (strain ATCC 15692 / PAO1 / 1C / PRS 101 / LMG 12228) GN=rpsE PE=3 SV=1	1	1	1
tr|Q9I6A0|Q9I6A0_PSEAE	sp|Q9HXZ4|PYRG_PSEAE			>sp|Q9HXZ4|PYRG_PSEAE CTP synthase OS=Pseudomonas aeruginosa (strain ATCC 15692 / PAO1 / 1C / PRS 101 / LMG 12228) GN=pyrG PE=3 SV=1	1	2	2
tr|Q9I6H5|Q9I6H5_PSEAE	sp|Q9HYR9|CLPP2_PSEAE			>sp|Q9HYR9|CLPP2_PSEAE ATP-dependent Clp protease proteolytic subunit 2 OS=Pseudomonas aeruginosa (strain ATCC 15692 / PAO1 / 1C / PRS 101 / LMG 12228) GN=clpP2 PE=3 SV=1	1	1	1
tr|Q9I6J2|Q9I6J2_PSEAE	sp|Q9HZ71|RS1_PSEAE			>sp|Q9HZ71|RS1_PSEAE 30S ribosomal protein S1 OS=Pseudomonas aeruginosa (strain ATCC 15692 / PAO1 / 1C / PRS 101 / LMG 12228) GN=rpsA PE=3 SV=1	1	3	3
	sp|Q9HZE0|DHE2_PSEAE			>sp|Q9HZE0|DHE2_PSEAE NAD-specific glutamate dehydrogenase OS=Pseudomonas aeruginosa (strain ATCC 15692 / PAO1 / 1C / PRS 101 / LMG 12228) GN=gdhB PE=1 SV=1	1	10	10
	sp|Q9HZJ3|FADA_PSEAE			>sp|Q9HZJ3|FADA_PSEAE 3-ketoacyl-CoA thiolase OS=Pseudomonas aeruginosa (strain ATCC 15692 / PAO1 / 1C / PRS 101 / LMG 12228) GN=fadA PE=3 SV=1	1	1	1
	sp|Q9HZP6|ETFB_PSEAE			>sp|Q9HZP6|ETFB_PSEAE Electron transfer flavoprotein subunit beta OS=Pseudomonas aeruginosa (strain ATCC 15692 / PAO1 / 1C / PRS 101 / LMG 12228) GN=etfB PE=3 SV=1	1	1	1
	sp|Q9I0J6|NUOG_PSEAE			>sp|Q9I0J6|NUOG_PSEAE NADH-quinone oxidoreductase subunit G OS=Pseudomonas aeruginosa (strain ATCC 15692 / PAO1 / 1C / PRS 101 / LMG 12228) GN=nuoG PE=3 SV=1	1	2	2
	sp|Q9I0K4|ACEA_PSEAE			>sp|Q9I0K4|ACEA_PSEAE Isocitrate lyase OS=Pseudomonas aeruginosa (strain ATCC 15692 / PAO1 / 1C / PRS 101 / LMG 12228) GN=PA2634 PE=1 SV=1	1	8	8
	sp|Q9I2V5|ACNB_PSEAE			>sp|Q9I2V5|ACNB_PSEAE Aconitate hydratase B OS=Pseudomonas aeruginosa (strain ATCC 15692 / PAO1 / 1C / PRS 101 / LMG 12228) GN=acnB PE=3 SV=1	1	8	8
	sp|Q9I2W7|RRAAH_PSEAE			>sp|Q9I2W7|RRAAH_PSEAE Putative 4-hydroxy-4-methyl-2-oxoglutarate aldolase OS=Pseudomonas aeruginosa (strain ATCC 15692 / PAO1 / 1C / PRS 101 / LMG 12228) GN=PA1772 PE=1 SV=1	1	1	1
	sp|Q9I3C5|HTPG_PSEAE			>sp|Q9I3C5|HTPG_PSEAE Chaperone protein HtpG OS=Pseudomonas aeruginosa (strain ATCC 15692 / PAO1 / 1C / PRS 101 / LMG 12228) GN=htpG PE=3 SV=1	1	1	1
	sp|Q9I3D1|DLDH2_PSEAE			>sp|Q9I3D1|DLDH2_PSEAE Dihydrolipoyl dehydrogenase OS=Pseudomonas aeruginosa (strain ATCC 15692 / PAO1 / 1C / PRS 101 / LMG 12228) GN=lpdG PE=3 SV=1	1	7	7
	sp|Q9I3F5|ACNA_PSEAE			>sp|Q9I3F5|ACNA_PSEAE Aconitate hydratase A OS=Pseudomonas aeruginosa (strain ATCC 15692 / PAO1 / 1C / PRS 101 / LMG 12228) GN=acnA PE=3 SV=1	1	6	6
	sp|Q9I4W3|DAPA_PSEAE			>sp|Q9I4W3|DAPA_PSEAE 4-hydroxy-tetrahydrodipicolinate synthase OS=Pseudomonas aeruginosa (strain ATCC 15692 / PAO1 / 1C / PRS 101 / LMG 12228) GN=dapA PE=1 SV=1	1	1	1
	sp|Q9I576|HPPD_PSEAE			>sp|Q9I576|HPPD_PSEAE 4-hydroxyphenylpyruvate dioxygenase OS=Pseudomonas aeruginosa (strain ATCC 15692 / PAO1 / 1C / PRS 101 / LMG 12228) GN=hpd PE=3 SV=1	1	1	1
	sp|Q9I617|BIOF_PSEAE			>sp|Q9I617|BIOF_PSEAE 8-amino-7-oxononanoate synthase OS=Pseudomonas aeruginosa (strain ATCC 15692 / PAO1 / 1C / PRS 101 / LMG 12228) GN=bioF PE=3 SV=1	1	2	2
	sp|Q9I685|SAHH_PSEAE			>sp|Q9I685|SAHH_PSEAE Adenosylhomocysteinase OS=Pseudomonas aeruginosa (strain ATCC 15692 / PAO1 / 1C / PRS 101 / LMG 12228) GN=ahcY PE=3 SV=1	1	10	10
	sp|Q9I6M4|DAVT_PSEAE			>sp|Q9I6M4|DAVT_PSEAE 5-aminovalerate aminotransferase DavT OS=Pseudomonas aeruginosa (strain ATCC 15692 / PAO1 / 1C / PRS 101 / LMG 12228) GN=davT PE=1 SV=1	1	1	1
	sp|Q9I6M5|DAVD_PSEAE			>sp|Q9I6M5|DAVD_PSEAE Glutarate-semialdehyde dehydrogenase DavD OS=Pseudomonas aeruginosa (strain ATCC 15692 / PAO1 / 1C / PRS 101 / LMG 12228) GN=davD PE=1 SV=1	1	1	1
	sp|Q9I747|HCP1_PSEAE			>sp|Q9I747|HCP1_PSEAE Protein hcp1 OS=Pseudomonas aeruginosa (strain ATCC 15692 / PAO1 / 1C / PRS 101 / LMG 12228) GN=hcp1 PE=1 SV=1	1	2	2
	sp|Q9S508|PHZB2_PSEAE			>sp|Q9S508|PHZB2_PSEAE Phenazine biosynthesis protein PhzB 2 OS=Pseudomonas aeruginosa (strain ATCC 15692 / PAO1 / 1C / PRS 101 / LMG 12228) GN=phzB2 PE=1 SV=1	1	3	3
	sp|Q9X4G0|HGD_PSEAE			>sp|Q9X4G0|HGD_PSEAE Homogentisate 1,2-dioxygenase OS=Pseudomonas aeruginosa (strain ATCC 15692 / PAO1 / 1C / PRS 101 / LMG 12228) GN=hmgA PE=3 SV=2	1	1	1
	tr|G3XD80|G3XD80_PSEAE			>tr|G3XD80|G3XD80_PSEAE Probable uroporphyrin-III c-methyltransferase OS=Pseudomonas aeruginosa (strain ATCC 15692 / PAO1 / 1C / PRS 101 / LMG 12228) GN=PA0510 PE=3 SV=1	1	1	1
	tr|Q9HTD1|Q9HTD1_PSEAE			>tr|Q9HTD1|Q9HTD1_PSEAE Probable transcarboxylase subunit OS=Pseudomonas aeruginosa (strain ATCC 15692 / PAO1 / 1C / PRS 101 / LMG 12228) GN=PA5435 PE=4 SV=1	1	29	29
	tr|Q9HTD9|Q9HTD9_PSEAE			>tr|Q9HTD9|Q9HTD9_PSEAE Alcohol dehydrogenase OS=Pseudomonas aeruginosa (strain ATCC 15692 / PAO1 / 1C / PRS 101 / LMG 12228) GN=adhA PE=1 SV=1	1	3	3
	tr|Q9HTP2|Q9HTP2_PSEAE			>tr|Q9HTP2|Q9HTP2_PSEAE Probable aldehyde dehydrogenase OS=Pseudomonas aeruginosa (strain ATCC 15692 / PAO1 / 1C / PRS 101 / LMG 12228) GN=PA5312 PE=3 SV=1	1	2	2
	tr|Q9HU07|Q9HU07_PSEAE			>tr|Q9HU07|Q9HU07_PSEAE Uncharacterized protein OS=Pseudomonas aeruginosa (strain ATCC 15692 / PAO1 / 1C / PRS 101 / LMG 12228) GN=PA5182 PE=4 SV=1	1	1	1
	tr|Q9HV54|Q9HV54_PSEAE			>tr|Q9HV54|Q9HV54_PSEAE Transcription termination/antitermination protein NusA OS=Pseudomonas aeruginosa (strain ATCC 15692 / PAO1 / 1C / PRS 101 / LMG 12228) GN=nusA PE=3 SV=1	1	1	1
	tr|Q9HW49|Q9HW49_PSEAE			>tr|Q9HW49|Q9HW49_PSEAE Uncharacterized protein OS=Pseudomonas aeruginosa (strain ATCC 15692 / PAO1 / 1C / PRS 101 / LMG 12228) GN=PA4352 PE=3 SV=1	1	6	6
	tr|Q9HWV0|Q9HWV0_PSEAE			>tr|Q9HWV0|Q9HWV0_PSEAE Probable nonribosomal peptide synthetase OS=Pseudomonas aeruginosa (strain ATCC 15692 / PAO1 / 1C / PRS 101 / LMG 12228) GN=PA4078 PE=4 SV=1	1	1	1
	tr|Q9HXR8|Q9HXR8_PSEAE			>tr|Q9HXR8|Q9HXR8_PSEAE Probable FMN oxidoreductase OS=Pseudomonas aeruginosa (strain ATCC 15692 / PAO1 / 1C / PRS 101 / LMG 12228) GN=PA3723 PE=4 SV=1	1	1	1
	tr|Q9HXU8|Q9HXU8_PSEAE			>tr|Q9HXU8|Q9HXU8_PSEAE Lipotoxon F, LptF OS=Pseudomonas aeruginosa (strain ATCC 15692 / PAO1 / 1C / PRS 101 / LMG 12228) GN=lptF PE=3 SV=1	1	1	1
	tr|Q9HY13|Q9HY13_PSEAE			>tr|Q9HY13|Q9HY13_PSEAE Uncharacterized protein OS=Pseudomonas aeruginosa (strain ATCC 15692 / PAO1 / 1C / PRS 101 / LMG 12228) GN=PA3613 PE=4 SV=1	1	2	2
	tr|Q9HY81|Q9HY81_PSEAE			>tr|Q9HY81|Q9HY81_PSEAE Probable peroxidase OS=Pseudomonas aeruginosa (strain ATCC 15692 / PAO1 / 1C / PRS 101 / LMG 12228) GN=PA3529 PE=1 SV=1	1	3	3
	tr|Q9HYT5|Q9HYT5_PSEAE			>tr|Q9HYT5|Q9HYT5_PSEAE Uncharacterized protein OS=Pseudomonas aeruginosa (strain ATCC 15692 / PAO1 / 1C / PRS 101 / LMG 12228) GN=PA3309 PE=3 SV=1	1	5	5
	tr|Q9HYZ6|Q9HYZ6_PSEAE			>tr|Q9HYZ6|Q9HYZ6_PSEAE Site-determining protein OS=Pseudomonas aeruginosa (strain ATCC 15692 / PAO1 / 1C / PRS 101 / LMG 12228) GN=minD PE=3 SV=1	1	1	1
	tr|Q9HZK4|Q9HZK4_PSEAE			>tr|Q9HZK4|Q9HZK4_PSEAE Glyceraldehyde-3-phosphate dehydrogenase OS=Pseudomonas aeruginosa (strain ATCC 15692 / PAO1 / 1C / PRS 101 / LMG 12228) GN=PA3001 PE=3 SV=1	1	3	3
	tr|Q9I028|Q9I028_PSEAE			>tr|Q9I028|Q9I028_PSEAE Probable acyl-CoA dehydrogenase OS=Pseudomonas aeruginosa (strain ATCC 15692 / PAO1 / 1C / PRS 101 / LMG 12228) GN=PA2815 PE=4 SV=1	1	1	1
	tr|Q9I0L5|Q9I0L5_PSEAE			>tr|Q9I0L5|Q9I0L5_PSEAE Isocitrate dehydrogenase [NADP] OS=Pseudomonas aeruginosa (strain ATCC 15692 / PAO1 / 1C / PRS 101 / LMG 12228) GN=icd PE=3 SV=1	1	6	6
	tr|Q9I0T1|Q9I0T1_PSEAE			>tr|Q9I0T1|Q9I0T1_PSEAE Probable acyl-CoA thiolase OS=Pseudomonas aeruginosa (strain ATCC 15692 / PAO1 / 1C / PRS 101 / LMG 12228) GN=PA2553 PE=3 SV=1	1	4	4
	tr|Q9I0Z9|Q9I0Z9_PSEAE			>tr|Q9I0Z9|Q9I0Z9_PSEAE Uncharacterized protein OS=Pseudomonas aeruginosa (strain ATCC 15692 / PAO1 / 1C / PRS 101 / LMG 12228) GN=PA2483 PE=4 SV=1	1	1	1
	tr|Q9I1E7|Q9I1E7_PSEAE			>tr|Q9I1E7|Q9I1E7_PSEAE Alkyl hydroperoxide reductase AhpD OS=Pseudomonas aeruginosa (strain ATCC 15692 / PAO1 / 1C / PRS 101 / LMG 12228) GN=PA2331 PE=3 SV=1	1	3	3
	tr|Q9I1E8|Q9I1E8_PSEAE			>tr|Q9I1E8|Q9I1E8_PSEAE Uncharacterized protein OS=Pseudomonas aeruginosa (strain ATCC 15692 / PAO1 / 1C / PRS 101 / LMG 12228) GN=PA2330 PE=4 SV=1	1	1	1
	tr|Q9I246|Q9I246_PSEAE			>tr|Q9I246|Q9I246_PSEAE Probable carbamoyl transferase OS=Pseudomonas aeruginosa (strain ATCC 15692 / PAO1 / 1C / PRS 101 / LMG 12228) GN=PA2069 PE=4 SV=1	1	7	7
	tr|Q9I299|Q9I299_PSEAE			>tr|Q9I299|Q9I299_PSEAE Methylcrotonyl-CoA carboxylase, alpha-subunit (Biotin-containing) OS=Pseudomonas aeruginosa (strain ATCC 15692 / PAO1 / 1C / PRS 101 / LMG 12228) GN=liuD PE=1 SV=1	1	11	11
	tr|Q9I2A9|Q9I2A9_PSEAE			>tr|Q9I2A9|Q9I2A9_PSEAE DhcB, dehydrocarnitine CoA transferase, subunit B OS=Pseudomonas aeruginosa (strain ATCC 15692 / PAO1 / 1C / PRS 101 / LMG 12228) GN=dhcB PE=4 SV=1	1	1	1
	tr|Q9I3B2|Q9I3B2_PSEAE			>tr|Q9I3B2|Q9I3B2_PSEAE Beta-ketoacyl-ACP synthase I OS=Pseudomonas aeruginosa (strain ATCC 15692 / PAO1 / 1C / PRS 101 / LMG 12228) GN=fabB PE=3 SV=1	1	1	1
	tr|Q9I3D3|Q9I3D3_PSEAE			>tr|Q9I3D3|Q9I3D3_PSEAE 2-oxoglutarate dehydrogenase (E1 subunit) OS=Pseudomonas aeruginosa (strain ATCC 15692 / PAO1 / 1C / PRS 101 / LMG 12228) GN=sucA PE=4 SV=1	1	5	5
	tr|Q9I3D4|Q9I3D4_PSEAE			>tr|Q9I3D4|Q9I3D4_PSEAE Succinate dehydrogenase (B subunit) OS=Pseudomonas aeruginosa (strain ATCC 15692 / PAO1 / 1C / PRS 101 / LMG 12228) GN=sdhB PE=4 SV=1	1	4	4
	tr|Q9I3D5|Q9I3D5_PSEAE			>tr|Q9I3D5|Q9I3D5_PSEAE Succinate dehydrogenase flavoprotein subunit OS=Pseudomonas aeruginosa (strain ATCC 15692 / PAO1 / 1C / PRS 101 / LMG 12228) GN=sdhA PE=3 SV=1	1	5	5
	tr|Q9I5B2|Q9I5B2_PSEAE			>tr|Q9I5B2|Q9I5B2_PSEAE Uncharacterized protein OS=Pseudomonas aeruginosa (strain ATCC 15692 / PAO1 / 1C / PRS 101 / LMG 12228) GN=PA0827 PE=4 SV=1	1	2	2
	tr|Q9I5E3|Q9I5E3_PSEAE			>tr|Q9I5E3|Q9I5E3_PSEAE Citrate synthase OS=Pseudomonas aeruginosa (strain ATCC 15692 / PAO1 / 1C / PRS 101 / LMG 12228) GN=prpC PE=3 SV=1	1	1	1
	tr|Q9I5U9|Q9I5U9_PSEAE			>tr|Q9I5U9|Q9I5U9_PSEAE Uncharacterized protein OS=Pseudomonas aeruginosa (strain ATCC 15692 / PAO1 / 1C / PRS 101 / LMG 12228) GN=PA0588 PE=4 SV=1	1	7	7
	tr|Q9I659|Q9I659_PSEAE			>tr|Q9I659|Q9I659_PSEAE Probable ClpA/B protease ATP binding subunit OS=Pseudomonas aeruginosa (strain ATCC 15692 / PAO1 / 1C / PRS 101 / LMG 12228) GN=PA0459 PE=4 SV=1	1	5	5
	tr|Q9I689|Q9I689_PSEAE			>tr|Q9I689|Q9I689_PSEAE ATP-dependent RNA helicase RhlE OS=Pseudomonas aeruginosa (strain ATCC 15692 / PAO1 / 1C / PRS 101 / LMG 12228) GN=rhlE PE=3 SV=1	1	1	1
	tr|Q9I6A0|Q9I6A0_PSEAE			>tr|Q9I6A0|Q9I6A0_PSEAE Probable cystathionine gamma-lyase OS=Pseudomonas aeruginosa (strain ATCC 15692 / PAO1 / 1C / PRS 101 / LMG 12228) GN=PA0400 PE=3 SV=1	1	1	1
	tr|Q9I6H5|Q9I6H5_PSEAE			>tr|Q9I6H5|Q9I6H5_PSEAE D-3-phosphoglycerate dehydrogenase OS=Pseudomonas aeruginosa (strain ATCC 15692 / PAO1 / 1C / PRS 101 / LMG 12228) GN=serA PE=3 SV=1	1	2	2
	tr|Q9I6J2|Q9I6J2_PSEAE			>tr|Q9I6J2|Q9I6J2_PSEAE Putrescine aminotransferase OS=Pseudomonas aeruginosa (strain ATCC 15692 / PAO1 / 1C / PRS 101 / LMG 12228) GN=spuC PE=3 SV=1	1	1	1
	tr|Q9I6Z3|Q9I6Z3_PSEAE			>tr|Q9I6Z3|Q9I6Z3_PSEAE Alkyl hydroperoxide reductase subunit C OS=Pseudomonas aeruginosa (strain ATCC 15692 / PAO1 / 1C / PRS 101 / LMG 12228) GN=ahpC PE=4 SV=1	1	6	6

## Sheet: 6-3 proteinGroups C4HSL-1
Protein IDs	Majority protein IDs	Peptide counts (all)	Peptide counts (razor+unique)	Peptide counts (unique)	Fasta headers	Number of proteins	Peptides	Razor + unique peptides	Unique peptides	Sequence coverage [%]	Unique + razor sequence coverage [%]	Unique sequence coverage [%]	Mol. weight [kDa]	Sequence length	Sequence lengths	Q-value	Score	Intensity	MS/MS Count	Only identified by site	Reverse	Potential contaminant	id	Peptide IDs	Peptide is razor	Mod. peptide IDs	Evidence IDs	MS/MS IDs	Best MS/MS	Oxidation (M) site IDs	Oxidation (M) site positions
CON__P00761	CON__P00761	4	4	4	>P00761 SWISS-PROT:P00761|TRYP_PIG Trypsin - Sus scrofa (Pig).	1	4	4	4	25.1	25.1	25.1	24.409	231	231	0	83.009	1941400000	82			+	0	174;219;255;366	True;True;True;True	181;182;227;264;379	315;316;317;318;319;320;426;427;428;429;492;493;724;725;726;727;728;729	553;554;555;556;557;558;559;560;561;562;563;564;784;785;786;787;788;789;790;791;792;793;794;795;796;797;798;799;800;801;802;803;804;805;806;807;808;809;810;904;905;906;907;908;909;910;911;1496;1497;1498;1499;1500;1501;1502;1503;1504;1505;1506;1507;1508;1509;1510;1511;1512;1513;1514;1515;1516;1517;1518;1519;1520;1521;1522;1523;1524;1525;1526;1527;1528;1529;1530	556;792;910;1516	0	94
CON__P02535-1;CON__P13645	CON__P02535-1;CON__P13645	1;1	1;1	1;1	>P02535-1 SWISS-PROT:P02535-1 Tax_Id=10090 Gene_Symbol=Krt10 Isoform 1 of Keratin, type I cytoskeletal 10;>P13645 SWISS-PROT:P13645 Tax_Id=9606 Gene_Symbol=KRT10 Keratin, type I cytoskeletal 10	2	1	1	1	1.6	1.6	1.6	57.769	570	570;593	0	8.2994	3956600	2			+	1	214	TRUE	222	418;419	775;776	775
CON__P04264;CON__P35908;CON__Q9R0H5;CON__Q6NXH9;CON__Q8BGZ7;CON__P50446;CON__Q6IFZ6;CON__Q7Z794;CON__Q922U2;CON__Q5XQN5;CON__ENSEMBL:ENSBTAP00000038253	CON__P04264	5;2;1;1;1;1;1;1;1;1;1	5;2;1;1;1;1;1;1;1;1;1	5;2;1;1;1;1;1;1;1;1;1	>P04264 SWISS-PROT:P04264 Tax_Id=9606 Gene_Symbol=KRT1 Keratin, type II cytoskeletal 1	11	5	5	5	8.4	8.4	8.4	66.017	644	644;645;524;539;551;553;572;578;580;601;606	0	54.953	35600000	13			+	2	112;165;243;330;421	True;True;True;True;True	117;171;252;342;435	203;204;299;300;474;642;643;847	344;345;346;347;348;349;527;528;882;1227;1228;1229;1745	344;527;882;1227;1745
CON__Streptavidin	CON__Streptavidin	7	7	7	>Streptavidin (S.avidinii)	1	7	7	7	49.4	49.4	49.4	16.622	160	160	0	135.04	4077400000	338			+	3	183;184;287;336;419;420;432	True;True;True;True;True;True;True	191;192;298;349;433;434;446	334;335;336;337;338;339;340;341;342;343;344;345;346;347;348;349;350;351;352;353;354;355;356;357;358;359;360;361;362;363;364;365;366;545;546;547;548;549;550;551;552;553;554;555;556;557;558;559;560;561;562;563;564;565;652;653;654;655;656;657;658;659;660;821;822;823;824;825;826;827;828;829;830;831;832;833;834;835;836;837;838;839;840;841;842;843;844;845;846;871	585;586;587;588;589;590;591;592;593;594;595;596;597;598;599;600;601;602;603;604;605;606;607;608;609;610;611;612;613;614;615;616;617;618;619;620;621;622;623;624;625;626;627;628;629;630;631;632;633;634;635;636;637;638;639;640;641;642;643;644;645;646;647;648;649;650;651;652;653;654;655;656;657;658;659;660;661;662;663;664;665;666;667;668;669;670;671;672;673;674;675;676;677;678;679;680;681;682;683;684…	620;700;1068;1312;1696;1744;1779
REV__tr|Q9HXW2|Q9HXW2_PSEAE	REV__tr|Q9HXW2|Q9HXW2_PSEAE	1	1	1	>tr|Q9HXW2|Q9HXW2_PSEAE Probable transcriptional regulator OS=Pseudomonas aeruginosa (strain ATCC 15692 / PAO1 / 1C / PRS 101 / LMG 12228) GN=PA3678 PE=4 SV=1	1	1	1	1	0	0	0	23.15	212	212	0.01087	5.9053	226330000	8		+		4	205	TRUE	213	401;402	750;751;752;753;754;755;756;757	752
sp|O52759|RS4_PSEAE	sp|O52759|RS4_PSEAE	2	2	2	>sp|O52759|RS4_PSEAE 30S ribosomal protein S4 OS=Pseudomonas aeruginosa (strain ATCC 15692 / PAO1 / 1C / PRS 101 / LMG 12228) GN=rpsD PE=3 SV=2	1	2	2	2	12.6	12.6	12.6	23.277	206	206	0	20.142	12841000	4				5	27;253	True;True	29;262	45;46;489;490	105;106;901;902	106;901
sp|O52760|RPOA_PSEAE	sp|O52760|RPOA_PSEAE	2	2	2	>sp|O52760|RPOA_PSEAE DNA-directed RNA polymerase subunit alpha OS=Pseudomonas aeruginosa (strain ATCC 15692 / PAO1 / 1C / PRS 101 / LMG 12228) GN=rpoA PE=3 SV=2	1	2	2	2	6	6	6	36.649	333	333	0	11.497	300170	1				6	190;332	True;True	198;344	375;646	712;1233	712;1233
sp|O52762|CATA_PSEAE	sp|O52762|CATA_PSEAE	3	3	3	>sp|O52762|CATA_PSEAE Catalase OS=Pseudomonas aeruginosa (strain ATCC 15692 / PAO1 / 1C / PRS 101 / LMG 12228) GN=katA PE=1 SV=1	1	3	3	3	8.7	8.7	8.7	55.588	482	482	0	35.999	10109000	4				7	142;144;215	True;True;True	147;149;223	253;256;420;421	427;438;777;778	427;438;778
sp|O68822|AMPA_PSEAE	sp|O68822|AMPA_PSEAE	13	13	13	>sp|O68822|AMPA_PSEAE Cytosol aminopeptidase OS=Pseudomonas aeruginosa (strain ATCC 15692 / PAO1 / 1C / PRS 101 / LMG 12228) GN=pepA PE=3 SV=1	1	13	13	13	29.5	29.5	29.5	52.331	495	495	0	120.1	160800000	40				8	60;61;87;121;135;137;199;210;232;239;304;343;373	True;True;True;True;True;True;True;True;True;True;True;True;True	63;64;92;126;140;142;207;218;240;248;315;356;386	105;106;107;108;109;162;163;217;218;240;245;246;387;388;411;412;453;454;467;591;676;677;740;741	194;195;196;197;198;199;200;201;293;294;364;365;396;414;415;416;417;725;726;767;768;769;850;851;852;853;854;855;856;869;870;871;872;873;1140;1374;1375;1376;1377;1545;1546	195;201;294;364;396;415;726;767;851;870;1140;1375;1546
sp|Q9S508|PHZB2_PSEAE;sp|O69753|PHZB1_PSEAE	sp|Q9S508|PHZB2_PSEAE;sp|O69753|PHZB1_PSEAE	2;2	2;2	2;2	>sp|Q9S508|PHZB2_PSEAE Phenazine biosynthesis protein PhzB 2 OS=Pseudomonas aeruginosa (strain ATCC 15692 / PAO1 / 1C / PRS 101 / LMG 12228) GN=phzB2 PE=1 SV=1;>sp|O69753|PHZB1_PSEAE Phenazine biosynthesis protein PhzB 1 OS=Pseudomonas aeruginosa (strain A	2	2	2	2	12.3	12.3	12.3	19.027	162	162;162	0	11.658	9001000	2				9	40;206	True;True	42;214	65;66;403	132;133;758	132;758
sp|O69754|PHZF_PSEAE	sp|O69754|PHZF_PSEAE	2	2	2	>sp|O69754|PHZF_PSEAE Trans-2,3-dihydro-3-hydroxyanthranilate isomerase OS=Pseudomonas aeruginosa (strain ATCC 15692 / PAO1 / 1C / PRS 101 / LMG 12228) GN=phzF1 PE=3 SV=2	1	2	2	2	13.3	13.3	13.3	30.342	278	278	0	11.691	2786400	2				10	270;273	True;True	279;283	515;521	948;967	948;967
sp|P04739|FMPO_PSEAE	sp|P04739|FMPO_PSEAE	1	1	1	>sp|P04739|FMPO_PSEAE Fimbrial protein OS=Pseudomonas aeruginosa (strain ATCC 15692 / PAO1 / 1C / PRS 101 / LMG 12228) GN=pilA PE=1 SV=1	1	1	1	1	9.4	9.4	9.4	15.512	149	149	0	11.924	7481300	3				11	322	TRUE	334	629;630	1211;1212;1213	1211
sp|P05384|DBHB_PSEAE	sp|P05384|DBHB_PSEAE	1	1	1	>sp|P05384|DBHB_PSEAE DNA-binding protein HU-beta OS=Pseudomonas aeruginosa (strain ATCC 15692 / PAO1 / 1C / PRS 101 / LMG 12228) GN=hupB PE=1 SV=3	1	1	1	1	15.6	15.6	15.6	9.0865	90	90	0	12.394	13920000	3				12	30	TRUE	32	49;50	109;110;111	111
sp|P08308|OTCC_PSEAE	sp|P08308|OTCC_PSEAE	6	6	6	>sp|P08308|OTCC_PSEAE Ornithine carbamoyltransferase, catabolic OS=Pseudomonas aeruginosa (strain ATCC 15692 / PAO1 / 1C / PRS 101 / LMG 12228) GN=arcB PE=1 SV=3	1	6	6	6	21.4	21.4	21.4	38.108	336	336	0	39.409	40067000	14				13	107;286;294;299;307;427	True;True;True;True;True;True	112;297;305;310;318;441	195;196;543;544;575;581;582;598;863;864	335;336;337;1007;1008;1009;1115;1121;1122;1123;1158;1767;1768;1769	337;1008;1115;1122;1158;1768
sp|P09591|EFTU_PSEAE	sp|P09591|EFTU_PSEAE	11	11	11	>sp|P09591|EFTU_PSEAE Elongation factor Tu OS=Pseudomonas aeruginosa (strain ATCC 15692 / PAO1 / 1C / PRS 101 / LMG 12228) GN=tufA PE=1 SV=2	1	11	11	11	39.3	39.3	39.3	43.369	397	397	0	137.9	622170000	118				14	17;22;71;77;136;153;258;285;312;360;398	True;True;True;True;True;True;True;True;True;True;True	17;23;24;74;80;81;141;159;267;295;296;323;373;411	27;28;35;36;37;38;129;130;138;139;140;141;142;241;242;243;244;276;277;278;279;496;497;498;536;537;538;539;540;541;542;605;606;713;714;785;786	57;58;59;60;61;62;76;77;78;79;80;81;82;83;84;85;86;87;88;89;90;91;92;93;94;95;96;97;233;234;243;244;245;246;247;248;249;250;251;252;397;398;399;400;401;402;403;404;405;406;407;408;409;410;411;412;413;487;488;489;490;491;492;493;494;495;496;497;498;916;917;918;919;920;921;922;982;983;984;985;986;987;988;989;990;991;992;993;994;995;996;997;998;999;1000;1001;1002;1003;1004;1005;1006;1165;1166;1167;1…	57;78;233;245;412;488;919;989;1166;1481;1612	1;2;3;4	177;216;362;372
sp|P11221|OPRI_PSEAE	sp|P11221|OPRI_PSEAE	3	3	3	>sp|P11221|OPRI_PSEAE Major outer membrane lipoprotein OS=Pseudomonas aeruginosa (strain ATCC 15692 / PAO1 / 1C / PRS 101 / LMG 12228) GN=oprI PE=3 SV=1	1	3	3	3	25.3	25.3	25.3	8.8348	83	83	0	19.643	849430	5				15	6;195;256	True;True;True	6;203;265	11;380;494	29;718;912;913;914	29;718;913
sp|P13794|PORF_PSEAE	sp|P13794|PORF_PSEAE	4	4	4	>sp|P13794|PORF_PSEAE Outer membrane porin F OS=Pseudomonas aeruginosa (strain ATCC 15692 / PAO1 / 1C / PRS 101 / LMG 12228) GN=oprF PE=1 SV=1	1	4	4	4	19.4	19.4	19.4	37.639	350	350	0	40.696	31208000	12				16	82;314;367;389	True;True;True;True	87;325;380;402	151;152;609;730;766;767;768;769	266;267;268;1171;1531;1579;1580;1581;1582;1583;1584;1585	266;1171;1531;1581
sp|P13981|ARCA_PSEAE	sp|P13981|ARCA_PSEAE	19	19	19	>sp|P13981|ARCA_PSEAE Arginine deiminase OS=Pseudomonas aeruginosa (strain ATCC 15692 / PAO1 / 1C / PRS 101 / LMG 12228) GN=arcA PE=1 SV=2	1	19	19	19	51.7	51.7	51.7	46.435	418	418	0	198.64	375160000	119				17	20;75;78;96;105;134;188;196;197;198;302;305;308;316;339;347;348;379;411	True;True;True;True;True;True;True;True;True;True;True;True;True;True;True;True;True;True;True	21;78;82;101;110;139;196;204;205;206;313;316;319;327;352;360;361;392;425	33;135;136;143;144;175;176;177;178;190;191;192;193;236;237;238;239;371;372;381;382;383;384;385;386;587;588;592;593;599;611;612;664;665;684;685;686;687;688;689;690;691;692;693;694;749;809;810	74;239;240;241;253;254;255;256;308;309;310;311;312;313;325;326;327;328;329;330;331;332;388;389;390;391;392;393;394;395;705;706;707;719;720;721;722;723;724;1129;1130;1131;1132;1133;1141;1142;1143;1144;1145;1146;1159;1173;1174;1330;1331;1332;1333;1334;1396;1397;1398;1399;1400;1401;1402;1403;1404;1405;1406;1407;1408;1409;1410;1411;1412;1413;1414;1415;1416;1417;1418;1419;1420;1421;1422;1423;1424;1425…	74;241;253;308;332;395;707;719;722;724;1130;1142;1159;1174;1333;1408;1419;1556;1665
sp|P14165|CISY_PSEAE	sp|P14165|CISY_PSEAE	2	2	2	>sp|P14165|CISY_PSEAE Citrate synthase OS=Pseudomonas aeruginosa (strain ATCC 15692 / PAO1 / 1C / PRS 101 / LMG 12228) GN=gltA PE=3 SV=2	1	2	2	2	6.3	6.3	6.3	47.694	428	428	0	13.168	2398000	4				18	23;280	True;True	25;290	39;40;529	98;99;100;975	98;975
sp|P28810|MMSA_PSEAE	sp|P28810|MMSA_PSEAE	1	1	1	>sp|P28810|MMSA_PSEAE Methylmalonate-semialdehyde dehydrogenase [acylating] OS=Pseudomonas aeruginosa (strain ATCC 15692 / PAO1 / 1C / PRS 101 / LMG 12228) GN=mmsA PE=1 SV=2	1	1	1	1	3.4	3.4	3.4	53.663	497	497	0	10.017	1977700	1				19	230	TRUE	238	451	848	848
sp|P30718|CH60_PSEAE	sp|P30718|CH60_PSEAE	10	10	10	>sp|P30718|CH60_PSEAE 60 kDa chaperonin OS=Pseudomonas aeruginosa (strain ATCC 15692 / PAO1 / 1C / PRS 101 / LMG 12228) GN=groL PE=1 SV=3	1	10	10	10	29.8	29.8	29.8	57.085	547	547	0	95.985	78749000	32				20	3;19;38;45;59;76;277;309;323;369	True;True;True;True;True;True;True;True;True;True	3;19;20;40;48;62;79;287;320;335;382	6;7;30;31;32;63;75;76;77;78;103;104;137;525;526;600;601;631;732;733	18;19;20;21;22;64;65;66;67;68;69;70;71;72;73;129;130;149;150;151;152;153;154;155;192;193;242;971;972;1160;1161;1214;1533;1534	21;66;130;151;192;242;972;1160;1214;1533	5	267
sp|P37798|ACCC_PSEAE	sp|P37798|ACCC_PSEAE	1	1	1	>sp|P37798|ACCC_PSEAE Biotin carboxylase OS=Pseudomonas aeruginosa (strain ATCC 15692 / PAO1 / 1C / PRS 101 / LMG 12228) GN=accC PE=1 SV=1	1	1	1	1	2.9	2.9	2.9	48.887	449	449	0.010638	5.8949	790320	1				21	377	TRUE	390	746	1551	1551
sp|P37799|BCCP_PSEAE	sp|P37799|BCCP_PSEAE	8	8	8	>sp|P37799|BCCP_PSEAE Biotin carboxyl carrier protein of acetyl-CoA carboxylase OS=Pseudomonas aeruginosa (strain ATCC 15692 / PAO1 / 1C / PRS 101 / LMG 12228) GN=accB PE=3 SV=1	1	8	8	8	62.2	62.2	62.2	16.455	156	156	0	141.81	1419400000	111				22	2;201;202;228;229;246;334;340	True;True;True;True;True;True;True;True	2;209;210;236;237;255;346;347;353	3;4;5;391;392;393;394;395;396;397;441;442;443;444;445;446;447;448;449;450;479;648;649;666;667;668;669;670;671	4;5;6;7;8;9;10;11;12;13;14;15;16;17;730;731;732;733;734;735;736;737;738;739;740;741;742;743;744;745;829;830;831;832;833;834;835;836;837;838;839;840;841;842;843;844;845;846;847;888;1235;1236;1237;1238;1239;1240;1241;1242;1243;1244;1245;1246;1247;1248;1249;1250;1251;1252;1253;1254;1255;1256;1257;1258;1259;1260;1335;1336;1337;1338;1339;1340;1341;1342;1343;1344;1345;1346;1347;1348;1349;1350;1351;1352…	10;739;743;838;846;888;1237;1336	6	87
sp|P43336|PHHC_PSEAE	sp|P43336|PHHC_PSEAE	4	4	4	>sp|P43336|PHHC_PSEAE Aromatic-amino-acid aminotransferase OS=Pseudomonas aeruginosa (strain ATCC 15692 / PAO1 / 1C / PRS 101 / LMG 12228) GN=phhC PE=3 SV=2	1	4	4	4	15	15	15	43.273	399	399	0	28.667	14967000	5				23	5;168;207;396	True;True;True;True	5;175;215;409	10;305;404;781;782	28;541;759;1607;1608	28;541;759;1608
sp|P47204|FTSZ_PSEAE	sp|P47204|FTSZ_PSEAE	1	1	1	>sp|P47204|FTSZ_PSEAE Cell division protein FtsZ OS=Pseudomonas aeruginosa (strain ATCC 15692 / PAO1 / 1C / PRS 101 / LMG 12228) GN=ftsZ PE=1 SV=2	1	1	1	1	4.8	4.8	4.8	41.218	394	394	0	9.7601	570060	4				24	408	TRUE	422	803;804	1653;1654;1655;1656	1653
sp|P53593|SUCC_PSEAE	sp|P53593|SUCC_PSEAE	10	10	10	>sp|P53593|SUCC_PSEAE Succinyl-CoA ligase [ADP-forming] subunit beta OS=Pseudomonas aeruginosa (strain ATCC 15692 / PAO1 / 1C / PRS 101 / LMG 12228) GN=sucC PE=3 SV=2	1	10	10	10	35.1	35.1	35.1	41.542	388	388	0	115.63	87219000	30				25	13;57;64;98;103;181;216;297;310;381	True;True;True;True;True;True;True;True;True;True	13;60;67;103;108;189;224;308;321;394	20;21;99;115;116;180;181;188;331;332;422;578;579;602;603;752;753;754;755	48;49;50;51;187;188;210;211;212;315;316;323;578;579;580;581;582;779;1118;1119;1162;1163;1559;1560;1561;1562;1563;1564;1565;1566	48;187;211;316;323;578;779;1118;1162;1560
sp|P53641|SODF_PSEAE	sp|P53641|SODF_PSEAE	3	3	3	>sp|P53641|SODF_PSEAE Superoxide dismutase [Fe] OS=Pseudomonas aeruginosa (strain ATCC 15692 / PAO1 / 1C / PRS 101 / LMG 12228) GN=sodB PE=3 SV=3	1	3	3	3	21.8	21.8	21.8	21.351	193	193	0	23.502	20128000	8				26	14;358;431	True;True;True	14;371;445	22;23;710;711;870	52;53;1475;1476;1477;1478;1777;1778	53;1475;1778
sp|P57668|TPX_PSEAE	sp|P57668|TPX_PSEAE	1	1	1	>sp|P57668|TPX_PSEAE Probable thiol peroxidase OS=Pseudomonas aeruginosa (strain ATCC 15692 / PAO1 / 1C / PRS 101 / LMG 12228) GN=tpx PE=3 SV=1	1	1	1	1	7.9	7.9	7.9	17.234	165	165	0	5.9194	508470	0				27	140	TRUE	145	250	423	423
sp|P72173|AAT_PSEAE	sp|P72173|AAT_PSEAE	2	2	2	>sp|P72173|AAT_PSEAE Aspartate aminotransferase OS=Pseudomonas aeruginosa (strain ATCC 15692 / PAO1 / 1C / PRS 101 / LMG 12228) GN=aspC PE=3 SV=2	1	2	2	2	6.3	6.3	6.3	43.319	398	398	0	15.192	4040200	2				28	370;412	True;True	383;426	734;735;811	1535;1536;1668	1536;1668
sp|Q51561|RPOB_PSEAE	sp|Q51561|RPOB_PSEAE	8	8	8	>sp|Q51561|RPOB_PSEAE DNA-directed RNA polymerase subunit beta OS=Pseudomonas aeruginosa (strain ATCC 15692 / PAO1 / 1C / PRS 101 / LMG 12228) GN=rpoB PE=3 SV=2	1	8	8	8	8.5	8.5	8.5	150.84	1357	1357	0	53.525	14826000	10				29	21;34;48;192;278;313;345;422	True;True;True;True;True;True;True;True	22;36;51;200;288;324;358;436	34;57;81;377;527;607;608;682;848	75;122;123;159;160;714;973;1169;1170;1394;1746	75;122;159;714;973;1170;1394;1746
sp|Q51567|SUCD_PSEAE	sp|Q51567|SUCD_PSEAE	3	3	3	>sp|Q51567|SUCD_PSEAE Succinyl-CoA ligase [ADP-forming] subunit alpha OS=Pseudomonas aeruginosa (strain ATCC 15692 / PAO1 / 1C / PRS 101 / LMG 12228) GN=sucD PE=3 SV=2	1	3	3	3	10.5	10.5	10.5	30.266	295	295	0	19.761	4047900	4				30	29;106;326	True;True;True	31;111;338	48;194;636	108;333;334;1221	108;333;1221
sp|Q59637|ODP1_PSEAE	sp|Q59637|ODP1_PSEAE	7	7	7	>sp|Q59637|ODP1_PSEAE Pyruvate dehydrogenase E1 component OS=Pseudomonas aeruginosa (strain ATCC 15692 / PAO1 / 1C / PRS 101 / LMG 12228) GN=aceE PE=3 SV=2	1	7	7	7	8.4	8.4	8.4	99.563	882	882	0	43.591	25587000	11				31	95;120;172;187;327;333;384	True;True;True;True;True;True;True	100;125;179;195;339;345;397	173;174;216;312;313;369;370;637;638;647;761	306;307;363;550;551;703;704;1222;1223;1234;1574	306;363;550;703;1222;1234;1574
sp|Q9HT18|ATPA_PSEAE	sp|Q9HT18|ATPA_PSEAE	7	7	7	>sp|Q9HT18|ATPA_PSEAE ATP synthase subunit alpha OS=Pseudomonas aeruginosa (strain ATCC 15692 / PAO1 / 1C / PRS 101 / LMG 12228) GN=atpA PE=3 SV=1	1	7	7	7	15.8	15.8	15.8	55.393	514	514	0	62.906	42543000	12				32	128;175;290;341;374;406;407	True;True;True;True;True;True;True	133;183;301;354;387;420;421	228;229;321;322;569;672;673;742;743;800;801;802	379;380;565;566;1109;1370;1371;1547;1548;1650;1651;1652	380;565;1109;1370;1547;1650;1652
sp|Q9HT20|ATPB_PSEAE	sp|Q9HT20|ATPB_PSEAE	1	1	1	>sp|Q9HT20|ATPB_PSEAE ATP synthase subunit beta OS=Pseudomonas aeruginosa (strain ATCC 15692 / PAO1 / 1C / PRS 101 / LMG 12228) GN=atpD PE=3 SV=1	1	1	1	1	2.4	2.4	2.4	49.499	458	458	0	5.9833	4386700	2				33	365	TRUE	378	722;723	1494;1495	1495
sp|Q9HTD7|ASPA_PSEAE	sp|Q9HTD7|ASPA_PSEAE	1	1	1	>sp|Q9HTD7|ASPA_PSEAE Aspartate ammonia-lyase OS=Pseudomonas aeruginosa (strain ATCC 15692 / PAO1 / 1C / PRS 101 / LMG 12228) GN=aspA PE=3 SV=1	1	1	1	1	5.1	5.1	5.1	51.069	474	474	0	6.6558	1563000	5				34	224	TRUE	232	436;437	821;822;823;824;825	823
sp|Q9HU65|GLNA_PSEAE	sp|Q9HU65|GLNA_PSEAE	2	2	2	>sp|Q9HU65|GLNA_PSEAE Glutamine synthetase OS=Pseudomonas aeruginosa (strain ATCC 15692 / PAO1 / 1C / PRS 101 / LMG 12228) GN=glnA PE=1 SV=1	1	2	2	2	8.5	8.5	8.5	51.944	469	469	0	23.668	7343700	6				35	261;301	True;True	270;312	501;584;585;586	925;926;1125;1126;1127;1128	926;1127
sp|Q9HU83|HUTU_PSEAE	sp|Q9HU83|HUTU_PSEAE	2	2	2	>sp|Q9HU83|HUTU_PSEAE Urocanate hydratase OS=Pseudomonas aeruginosa (strain ATCC 15692 / PAO1 / 1C / PRS 101 / LMG 12228) GN=hutU PE=1 SV=1	1	2	2	2	5.5	5.5	5.5	61.193	559	559	0	12.123	1118600	2				36	26;387	True;True	28;400	44;764	104;1577	104;1577
sp|Q9HVA2|ILVC_PSEAE	sp|Q9HVA2|ILVC_PSEAE	1	1	1	>sp|Q9HVA2|ILVC_PSEAE Ketol-acid reductoisomerase OS=Pseudomonas aeruginosa (strain ATCC 15692 / PAO1 / 1C / PRS 101 / LMG 12228) GN=ilvC PE=1 SV=1	1	1	1	1	5.6	5.6	5.6	36.424	338	338	0	7.1559	1082100	1				37	131	TRUE	136	232	383	383
sp|Q9HVY3|RS9_PSEAE	sp|Q9HVY3|RS9_PSEAE	1	1	1	>sp|Q9HVY3|RS9_PSEAE 30S ribosomal protein S9 OS=Pseudomonas aeruginosa (strain ATCC 15692 / PAO1 / 1C / PRS 101 / LMG 12228) GN=rpsI PE=3 SV=1	1	1	1	1	7.7	7.7	7.7	14.615	130	130	0	6.4713	3702500	2				38	36	TRUE	38	59;60	125;126	125
sp|Q9HWC9|RPOC_PSEAE	sp|Q9HWC9|RPOC_PSEAE	7	7	7	>sp|Q9HWC9|RPOC_PSEAE DNA-directed RNA polymerase subunit beta OS=Pseudomonas aeruginosa (strain ATCC 15692 / PAO1 / 1C / PRS 101 / LMG 12228) GN=rpoC PE=3 SV=1	1	7	7	7	5.9	5.9	5.9	154.38	1399	1399	0	46.71	9835400	8				39	92;102;167;171;223;252;363	True;True;True;True;True;True;True	97;107;174;178;231;261;376	170;186;187;304;311;435;488;719	302;321;322;539;540;549;820;900;1486	302;322;540;549;820;900;1486
sp|Q9HWD2|EFG1_PSEAE;sp|Q9I244|EFG2_PSEAE	sp|Q9HWD2|EFG1_PSEAE	8;2	8;2	8;2	>sp|Q9HWD2|EFG1_PSEAE Elongation factor G 1 OS=Pseudomonas aeruginosa (strain ATCC 15692 / PAO1 / 1C / PRS 101 / LMG 12228) GN=fusA PE=1 SV=1	2	8	8	8	17.3	17.3	17.3	77.784	706	706;702	0	68.792	30839000	15				40	12;16;149;150;268;293;415;418	True;True;True;True;True;True;True;True	12;16;155;156;277;304;429;432	18;19;26;270;271;272;513;574;816;817;820	46;47;56;479;480;481;482;483;946;1114;1673;1674;1675;1678;1679	47;56;480;481;946;1114;1673;1679
sp|Q9HWD5|RL3_PSEAE	sp|Q9HWD5|RL3_PSEAE	2	2	2	>sp|Q9HWD5|RL3_PSEAE 50S ribosomal protein L3 OS=Pseudomonas aeruginosa (strain ATCC 15692 / PAO1 / 1C / PRS 101 / LMG 12228) GN=rplC PE=3 SV=1	1	2	2	2	13.3	13.3	13.3	22.591	211	211	0	12.466	2369000	2				41	123;405	True;True	128;419	220;799	367;1649	367;1649
sp|Q9HWD8|RL2_PSEAE	sp|Q9HWD8|RL2_PSEAE	2	2	2	>sp|Q9HWD8|RL2_PSEAE 50S ribosomal protein L2 OS=Pseudomonas aeruginosa (strain ATCC 15692 / PAO1 / 1C / PRS 101 / LMG 12228) GN=rplB PE=3 SV=1	1	2	2	2	11.4	11.4	11.4	29.579	273	273	0	14.912	9899400	5				42	58;148	True;True	61;154	100;101;102;268;269	189;190;191;477;478	191;478
sp|Q9HWE2|RL16_PSEAE	sp|Q9HWE2|RL16_PSEAE	1	1	1	>sp|Q9HWE2|RL16_PSEAE 50S ribosomal protein L16 OS=Pseudomonas aeruginosa (strain ATCC 15692 / PAO1 / 1C / PRS 101 / LMG 12228) GN=rplP PE=3 SV=1	1	1	1	1	6.6	6.6	6.6	15.401	137	137	0.010101	5.8262	1343400	1				43	251	TRUE	260	487	899	899
sp|Q9HWE5|RL14_PSEAE	sp|Q9HWE5|RL14_PSEAE	1	1	1	>sp|Q9HWE5|RL14_PSEAE 50S ribosomal protein L14 OS=Pseudomonas aeruginosa (strain ATCC 15692 / PAO1 / 1C / PRS 101 / LMG 12228) GN=rplN PE=3 SV=1	1	1	1	1	9.8	9.8	9.8	13.412	122	122	0	7.4406	3724200	2				44	109	TRUE	114	198;199	339;340	339
sp|Q9HWF4|RL15_PSEAE	sp|Q9HWF4|RL15_PSEAE	1	1	1	>sp|Q9HWF4|RL15_PSEAE 50S ribosomal protein L15 OS=Pseudomonas aeruginosa (strain ATCC 15692 / PAO1 / 1C / PRS 101 / LMG 12228) GN=rplO PE=3 SV=1	1	1	1	1	8.3	8.3	8.3	15.174	144	144	0	7.6459	925670	1				45	368	TRUE	381	731	1532	1532
sp|Q9HX33|SYL_PSEAE	sp|Q9HX33|SYL_PSEAE	1	1	1	>sp|Q9HX33|SYL_PSEAE Leucine--tRNA ligase OS=Pseudomonas aeruginosa (strain ATCC 15692 / PAO1 / 1C / PRS 101 / LMG 12228) GN=leuS PE=3 SV=1	1	1	1	1	1.9	1.9	1.9	97.647	873	873	0	6.1014	198910	1				46	118	TRUE	123	214	361	361
sp|Q9HZ71|RS1_PSEAE	sp|Q9HZ71|RS1_PSEAE	4	4	4	>sp|Q9HZ71|RS1_PSEAE 30S ribosomal protein S1 OS=Pseudomonas aeruginosa (strain ATCC 15692 / PAO1 / 1C / PRS 101 / LMG 12228) GN=rpsA PE=3 SV=1	1	4	4	4	9.7	9.7	9.7	61.869	559	559	0	35.181	12334000	2				47	15;86;122;130	True;True;True;True	15;91;127;135	24;25;161;219;231	54;55;292;366;382	54;292;366;382
sp|Q9HZE0|DHE2_PSEAE	sp|Q9HZE0|DHE2_PSEAE	24	24	24	>sp|Q9HZE0|DHE2_PSEAE NAD-specific glutamate dehydrogenase OS=Pseudomonas aeruginosa (strain ATCC 15692 / PAO1 / 1C / PRS 101 / LMG 12228) GN=gdhB PE=1 SV=1	1	24	24	24	20.3	20.3	20.3	182.64	1620	1620	0	194.14	124270000	55				48	1;7;24;28;31;51;70;97;99;209;220;231;240;245;264;283;328;346;351;372;375;383;403;430	True;True;True;True;True;True;True;True;True;True;True;True;True;True;True;True;True;True;True;True;True;True;True;True	1;7;26;30;33;54;73;102;104;217;228;239;249;254;273;293;340;359;364;385;388;396;417;444	1;2;12;41;42;47;51;86;87;125;126;127;128;179;182;407;408;409;410;430;431;452;468;469;477;478;506;507;532;533;639;683;698;738;739;744;759;760;795;869	1;2;3;30;101;102;107;112;169;170;171;172;223;224;225;226;227;228;229;230;231;232;314;317;762;763;764;765;766;811;812;813;849;874;875;885;886;887;932;933;934;935;936;937;978;979;1224;1395;1457;1543;1544;1549;1571;1572;1573;1645;1776	3;30;102;107;112;170;226;314;317;763;812;849;874;885;932;978;1224;1395;1457;1544;1549;1573;1645;1776
sp|Q9HZJ2|FADB_PSEAE	sp|Q9HZJ2|FADB_PSEAE	2	2	2	>sp|Q9HZJ2|FADB_PSEAE Fatty acid oxidation complex subunit alpha OS=Pseudomonas aeruginosa (strain ATCC 15692 / PAO1 / 1C / PRS 101 / LMG 12228) GN=fadB PE=3 SV=1	1	2	2	2	5.2	5.2	5.2	76.953	715	715	0	16.071	1464800	2				49	129;357	True;True	134;370	230;709	381;1474	381;1474
sp|Q9I0J6|NUOG_PSEAE	sp|Q9I0J6|NUOG_PSEAE	3	3	3	>sp|Q9I0J6|NUOG_PSEAE NADH-quinone oxidoreductase subunit G OS=Pseudomonas aeruginosa (strain ATCC 15692 / PAO1 / 1C / PRS 101 / LMG 12228) GN=nuoG PE=3 SV=1	1	3	3	3	4	4	4	98.999	905	905	0	20.549	4226000	3				50	35;56;254	True;True;True	37;59;263	58;98;491	124;186;903	124;186;903
sp|Q9I0K4|ACEA_PSEAE	sp|Q9I0K4|ACEA_PSEAE	9	9	9	>sp|Q9I0K4|ACEA_PSEAE Isocitrate lyase OS=Pseudomonas aeruginosa (strain ATCC 15692 / PAO1 / 1C / PRS 101 / LMG 12228) GN=PA2634 PE=1 SV=1	1	9	9	9	22	22	22	58.886	531	531	0	96.485	64432000	34				51	100;152;211;242;262;292;311;344;404	True;True;True;True;True;True;True;True;True	105;158;219;251;271;303;322;357;418	183;184;275;413;414;472;473;502;503;572;573;604;678;679;680;681;796;797;798	318;319;486;770;771;878;879;880;881;927;928;929;1112;1113;1164;1378;1379;1380;1381;1382;1383;1384;1385;1386;1387;1388;1389;1390;1391;1392;1393;1646;1647;1648	319;486;770;878;929;1112;1164;1379;1647
sp|Q9I1L9|DLDH1_PSEAE	sp|Q9I1L9|DLDH1_PSEAE	1	1	1	>sp|Q9I1L9|DLDH1_PSEAE Dihydrolipoyl dehydrogenase OS=Pseudomonas aeruginosa (strain ATCC 15692 / PAO1 / 1C / PRS 101 / LMG 12228) GN=lpdV PE=1 SV=1	1	1	1	1	2.8	2.8	2.8	48.588	464	464	0	7.2698	984800	1				52	94	TRUE	99	172	305	305
sp|Q9I1M2|ODBA_PSEAE	sp|Q9I1M2|ODBA_PSEAE	1	1	1	>sp|Q9I1M2|ODBA_PSEAE 2-oxoisovalerate dehydrogenase subunit alpha OS=Pseudomonas aeruginosa (strain ATCC 15692 / PAO1 / 1C / PRS 101 / LMG 12228) GN=bkdA1 PE=3 SV=1	1	1	1	1	3.2	3.2	3.2	45.256	410	410	0	7.342	1062600	1				53	295	TRUE	306	576	1116	1116
sp|Q9I2A8|ATOB_PSEAE	sp|Q9I2A8|ATOB_PSEAE	2	2	2	>sp|Q9I2A8|ATOB_PSEAE Acetyl-CoA acetyltransferase OS=Pseudomonas aeruginosa (strain ATCC 15692 / PAO1 / 1C / PRS 101 / LMG 12228) GN=atoB PE=3 SV=1	1	2	2	2	5.6	5.6	5.6	40.405	393	393	0	11.196	1514900	1				54	33;89	True;True	35;94	56;166	121;297	121;297
sp|Q9I2V5|ACNB_PSEAE	sp|Q9I2V5|ACNB_PSEAE	9	9	9	>sp|Q9I2V5|ACNB_PSEAE Aconitate hydratase B OS=Pseudomonas aeruginosa (strain ATCC 15692 / PAO1 / 1C / PRS 101 / LMG 12228) GN=acnB PE=3 SV=1	1	9	9	9	13.6	13.6	13.6	93.627	869	869	0	71.55	27647000	17				55	11;74;186;218;250;284;338;355;399	True;True;True;True;True;True;True;True;True	11;77;194;226;259;294;351;368;412	17;133;134;368;424;425;485;486;534;535;662;663;705;787;788	45;237;238;702;781;782;783;896;897;898;980;981;1328;1329;1470;1623;1624;1625	45;238;702;781;898;980;1329;1470;1625
sp|Q9I3D1|DLDH2_PSEAE	sp|Q9I3D1|DLDH2_PSEAE	8	8	8	>sp|Q9I3D1|DLDH2_PSEAE Dihydrolipoyl dehydrogenase OS=Pseudomonas aeruginosa (strain ATCC 15692 / PAO1 / 1C / PRS 101 / LMG 12228) GN=lpdG PE=3 SV=1	1	8	8	8	25.1	25.1	25.1	50.164	478	478	0	61.357	22388000	12				56	10;42;53;55;151;296;315;359	True;True;True;True;True;True;True;True	10;44;56;58;157;307;326;372	16;68;92;93;97;273;274;577;610;712	44;135;178;179;180;181;185;484;485;1117;1172;1479	44;135;179;185;485;1117;1172;1479
sp|Q9I3F5|ACNA_PSEAE	sp|Q9I3F5|ACNA_PSEAE	10	10	10	>sp|Q9I3F5|ACNA_PSEAE Aconitate hydratase A OS=Pseudomonas aeruginosa (strain ATCC 15692 / PAO1 / 1C / PRS 101 / LMG 12228) GN=acnA PE=3 SV=1	1	10	10	10	17	17	17	99.147	910	910	0	100.09	47342000	32				57	18;25;91;182;208;353;364;382;385;429	True;True;True;True;True;True;True;True;True;True	18;27;96;190;216;366;377;395;398;443	29;43;168;169;333;405;406;701;702;703;720;721;756;757;758;762;867;868	63;103;299;300;301;583;584;760;761;1461;1462;1463;1464;1465;1466;1467;1468;1487;1488;1489;1490;1491;1492;1493;1567;1568;1569;1570;1575;1772;1773;1774;1775	63;103;300;583;760;1462;1491;1570;1575;1772
sp|Q9I3I0|Y1533_PSEAE	sp|Q9I3I0|Y1533_PSEAE	1	1	1	>sp|Q9I3I0|Y1533_PSEAE Nucleoid-associated protein PA1533 OS=Pseudomonas aeruginosa (strain ATCC 15692 / PAO1 / 1C / PRS 101 / LMG 12228) GN=PA1533 PE=3 SV=1	1	1	1	1	17.6	17.6	17.6	11.877	108	108	1	-2	0	1	+			58	132	TRUE	137	233	384	384	7;8	6;20
sp|Q9I558|ACSA1_PSEAE;sp|Q9HV66|ACSA2_PSEAE	sp|Q9I558|ACSA1_PSEAE;sp|Q9HV66|ACSA2_PSEAE	2;1	2;1	2;1	>sp|Q9I558|ACSA1_PSEAE Acetyl-coenzyme A synthetase 1 OS=Pseudomonas aeruginosa (strain ATCC 15692 / PAO1 / 1C / PRS 101 / LMG 12228) GN=acsA1 PE=3 SV=1;>sp|Q9HV66|ACSA2_PSEAE Acetyl-coenzyme A synthetase 2 OS=Pseudomonas aeruginosa (strain ATCC 15692 / PA	2	2	2	2	4.3	4.3	4.3	71.762	651	651;645	0	15.105	1440800	2				59	47;72	True;True	50;75	80;131	158;235	158;235
sp|Q9I576|HPPD_PSEAE	sp|Q9I576|HPPD_PSEAE	2	2	2	>sp|Q9I576|HPPD_PSEAE 4-hydroxyphenylpyruvate dioxygenase OS=Pseudomonas aeruginosa (strain ATCC 15692 / PAO1 / 1C / PRS 101 / LMG 12228) GN=hpd PE=3 SV=1	1	2	2	2	7.3	7.3	7.3	39.912	357	357	0	20.842	2738200	3				60	116;289	True;True	121;300	212;567;568	359;1107;1108	359;1107
sp|Q9I5Y1|ALF_PSEAE	sp|Q9I5Y1|ALF_PSEAE	1	1	1	>sp|Q9I5Y1|ALF_PSEAE Fructose-bisphosphate aldolase OS=Pseudomonas aeruginosa (strain ATCC 15692 / PAO1 / 1C / PRS 101 / LMG 12228) GN=fba PE=3 SV=1	1	1	1	1	4	4	4	38.573	354	354	0	6.1272	709740	1				61	119	TRUE	124	215	362	362
sp|Q9I5Z0|METK_PSEAE	sp|Q9I5Z0|METK_PSEAE	1	1	1	>sp|Q9I5Z0|METK_PSEAE S-adenosylmethionine synthase OS=Pseudomonas aeruginosa (strain ATCC 15692 / PAO1 / 1C / PRS 101 / LMG 12228) GN=metK PE=3 SV=1	1	1	1	1	4	4	4	42.709	396	396	0	6.0514	861380	0				62	158	TRUE	164	286	505	505
sp|Q9I617|BIOF_PSEAE	sp|Q9I617|BIOF_PSEAE	1	1	1	>sp|Q9I617|BIOF_PSEAE 8-amino-7-oxononanoate synthase OS=Pseudomonas aeruginosa (strain ATCC 15692 / PAO1 / 1C / PRS 101 / LMG 12228) GN=bioF PE=3 SV=1	1	1	1	1	5	5	5	42.237	401	401	0	6.103	5703800	0				63	54	TRUE	57	94;95;96	182;183;184	184
sp|Q9I685|SAHH_PSEAE	sp|Q9I685|SAHH_PSEAE	8	8	8	>sp|Q9I685|SAHH_PSEAE Adenosylhomocysteinase OS=Pseudomonas aeruginosa (strain ATCC 15692 / PAO1 / 1C / PRS 101 / LMG 12228) GN=ahcY PE=3 SV=1	1	8	8	8	22.4	22.4	22.4	51.399	469	469	0	61.64	41616000	19				64	101;127;180;200;319;362;394;417	True;True;True;True;True;True;True;True	106;132;188;208;330;375;407;431	185;226;227;329;330;389;390;619;620;718;778;779;819	320;376;377;378;574;575;576;577;727;728;729;1184;1185;1485;1602;1603;1604;1605;1677	320;377;576;729;1184;1485;1602;1677
sp|Q9I6M4|DAVT_PSEAE	sp|Q9I6M4|DAVT_PSEAE	2	2	2	>sp|Q9I6M4|DAVT_PSEAE 5-aminovalerate aminotransferase DavT OS=Pseudomonas aeruginosa (strain ATCC 15692 / PAO1 / 1C / PRS 101 / LMG 12228) GN=davT PE=1 SV=1	1	2	2	2	5.9	5.9	5.9	45.22	426	426	0	13.139	2300100	2				65	337;376	True;True	350;389	661;745	1327;1550	1327;1550
sp|Q9I6M5|DAVD_PSEAE	sp|Q9I6M5|DAVD_PSEAE	1	1	1	>sp|Q9I6M5|DAVD_PSEAE Glutarate-semialdehyde dehydrogenase DavD OS=Pseudomonas aeruginosa (strain ATCC 15692 / PAO1 / 1C / PRS 101 / LMG 12228) GN=davD PE=1 SV=1	1	1	1	1	3.1	3.1	3.1	51.622	483	483	0	9.6366	3930100	2				66	390	TRUE	403	770	1586;1587	1587
tr|Q9HT30|Q9HT30_PSEAE	tr|Q9HT30|Q9HT30_PSEAE	1	1	1	>tr|Q9HT30|Q9HT30_PSEAE Uncharacterized protein OS=Pseudomonas aeruginosa (strain ATCC 15692 / PAO1 / 1C / PRS 101 / LMG 12228) GN=PA5544 PE=4 SV=1	1	1	1	1	2.5	2.5	2.5	72.105	674	674	1	-2	3539600	0	+			67	281	TRUE	291	530	976	976	9	1
tr|Q9HTD0|Q9HTD0_PSEAE	tr|Q9HTD0|Q9HTD0_PSEAE	3	3	3	>tr|Q9HTD0|Q9HTD0_PSEAE Probable biotin carboxylase subunit of a transcarboxylase OS=Pseudomonas aeruginosa (strain ATCC 15692 / PAO1 / 1C / PRS 101 / LMG 12228) GN=PA5436 PE=4 SV=1	1	3	3	3	8.3	8.3	8.3	51.848	471	471	0	28.869	3318400	3				68	68;111;154	True;True;True	71;116;160	122;202;280	220;343;499	220;343;499
tr|Q9HTD1|Q9HTD1_PSEAE	tr|Q9HTD1|Q9HTD1_PSEAE	32	32	32	>tr|Q9HTD1|Q9HTD1_PSEAE Probable transcarboxylase subunit OS=Pseudomonas aeruginosa (strain ATCC 15692 / PAO1 / 1C / PRS 101 / LMG 12228) GN=PA5435 PE=4 SV=1	1	32	32	32	56.3	56.3	56.3	66.095	607	607	0	319.16	1148900000	249				69	4;8;43;44;49;50;63;69;79;85;114;125;143;146;147;162;166;204;271;272;306;320;321;349;391;400;401;402;423;424;425;426	True;True;True;True;True;True;True;True;True;True;True;True;True;True;True;True;True;True;True;True;True;True;True;True;True;True;True;True;True;True;True;True	4;8;45;46;47;52;53;66;72;83;84;90;119;130;148;151;152;153;168;172;173;212;280;281;282;317;331;332;333;362;404;413;414;415;416;437;438;439;440	8;9;13;14;69;70;71;72;73;74;82;83;84;85;111;112;113;114;123;124;145;146;147;148;157;158;159;160;207;208;209;210;223;224;254;255;258;259;260;261;262;263;264;265;266;267;291;292;293;294;301;302;303;399;400;516;517;518;519;520;594;595;596;597;621;622;623;624;625;626;627;628;695;696;771;772;789;790;791;792;793;794;849;850;851;852;853;854;855;856;857;858;859;860;861;862	23;24;25;26;27;31;32;33;34;35;36;37;38;39;40;41;42;136;137;138;139;140;141;142;143;144;145;146;147;148;161;162;163;164;165;166;167;168;204;205;206;207;208;209;221;222;257;258;259;260;261;262;263;275;276;277;278;279;280;281;282;283;284;285;286;287;288;289;290;291;352;353;354;355;356;357;370;371;372;373;428;429;430;431;432;433;434;435;436;437;440;441;442;443;444;445;446;447;448;449;450;451;452;453;…	25;33;141;148;161;168;208;221;259;283;354;370;428;454;472;514;530;747;961;966;1150;1189;1195;1453;1589;1636;1637;1643;1747;1759;1761;1766	10;11;12;13;14;15;16;17	125;169;172;182;274;306;323;435
tr|Q9HTP2|Q9HTP2_PSEAE	tr|Q9HTP2|Q9HTP2_PSEAE	3	3	3	>tr|Q9HTP2|Q9HTP2_PSEAE Probable aldehyde dehydrogenase OS=Pseudomonas aeruginosa (strain ATCC 15692 / PAO1 / 1C / PRS 101 / LMG 12228) GN=PA5312 PE=3 SV=1	1	3	3	3	8	8	8	53.143	497	497	0	18.438	8700000	3				70	115;160;225	True;True;True	120;166;233	211;288;289;438	358;507;508;826	358;507;826
tr|Q9HUD3|Q9HUD3_PSEAE	tr|Q9HUD3|Q9HUD3_PSEAE	1	1	1	>tr|Q9HUD3|Q9HUD3_PSEAE Malic enzyme OS=Pseudomonas aeruginosa (strain ATCC 15692 / PAO1 / 1C / PRS 101 / LMG 12228) GN=PA5046 PE=4 SV=1	1	1	1	1	3.3	3.3	3.3	45.428	422	422	0	7.1204	606050	1				71	0	TRUE	0	0	0	0
tr|Q9HW32|Q9HW32_PSEAE	tr|Q9HW32|Q9HW32_PSEAE	1	1	1	>tr|Q9HW32|Q9HW32_PSEAE Insulin-cleaving metalloproteinase outer membrane protein OS=Pseudomonas aeruginosa (strain ATCC 15692 / PAO1 / 1C / PRS 101 / LMG 12228) GN=icmP PE=4 SV=1	1	1	1	1	5.2	5.2	5.2	47.23	446	446	0	7.9978	303270	1				72	9	TRUE	9	15	43	43
tr|Q9HW49|Q9HW49_PSEAE	tr|Q9HW49|Q9HW49_PSEAE	2	2	2	>tr|Q9HW49|Q9HW49_PSEAE Uncharacterized protein OS=Pseudomonas aeruginosa (strain ATCC 15692 / PAO1 / 1C / PRS 101 / LMG 12228) GN=PA4352 PE=3 SV=1	1	2	2	2	18.5	18.5	18.5	30.972	286	286	0	14.897	6244500	10				73	66;371	True;True	69;384	118;119;736;737	214;215;216;217;1537;1538;1539;1540;1541;1542	216;1539
tr|Q9HW72|Q9HW72_PSEAE	tr|Q9HW72|Q9HW72_PSEAE	1	1	1	>tr|Q9HW72|Q9HW72_PSEAE Pyruvate kinase OS=Pseudomonas aeruginosa (strain ATCC 15692 / PAO1 / 1C / PRS 101 / LMG 12228) GN=pykA PE=3 SV=1	1	1	1	1	5.6	5.6	5.6	52.252	483	483	0.010309	5.8493	494300	1				74	191	TRUE	199	376	713	713
tr|Q9HWQ0|Q9HWQ0_PSEAE	tr|Q9HWQ0|Q9HWQ0_PSEAE	1	1	1	>tr|Q9HWQ0|Q9HWQ0_PSEAE Probable iron-sulfur protein OS=Pseudomonas aeruginosa (strain ATCC 15692 / PAO1 / 1C / PRS 101 / LMG 12228) GN=PA4131 PE=4 SV=1	1	1	1	1	2.8	2.8	2.8	63.991	573	573	0	7.0244	871570	1				75	185	TRUE	193	367	701	701
tr|Q9HWV0|Q9HWV0_PSEAE	tr|Q9HWV0|Q9HWV0_PSEAE	6	6	6	>tr|Q9HWV0|Q9HWV0_PSEAE Probable nonribosomal peptide synthetase OS=Pseudomonas aeruginosa (strain ATCC 15692 / PAO1 / 1C / PRS 101 / LMG 12228) GN=PA4078 PE=4 SV=1	1	6	6	6	9	9	9	110.35	991	991	0	39.786	20474000	9				76	93;117;235;249;325;428	True;True;True;True;True;True	98;122;244;258;337;442	171;213;461;484;634;635;865;866	303;304;360;863;895;1219;1220;1770;1771	303;360;863;895;1220;1771
tr|Q9I2C4|Q9I2C4_PSEAE;tr|Q9HX05|Q9HX05_PSEAE	tr|Q9I2C4|Q9I2C4_PSEAE;tr|Q9HX05|Q9HX05_PSEAE	2;2	2;2	2;2	>tr|Q9I2C4|Q9I2C4_PSEAE NAD+ dependent aldehyde dehydrogenase ExaC OS=Pseudomonas aeruginosa (strain ATCC 15692 / PAO1 / 1C / PRS 101 / LMG 12228) GN=exaC PE=3 SV=1;>tr|Q9HX05|Q9HX05_PSEAE Probable aldehyde dehydrogenase OS=Pseudomonas aeruginosa (strain A	2	2	2	2	6.5	6.5	6.5	54.892	506	506;506	0	11.044	4981600	2				77	41;159	True;True	43;165	67;287	134;506	134;506
tr|Q9HY13|Q9HY13_PSEAE	tr|Q9HY13|Q9HY13_PSEAE	1	1	1	>tr|Q9HY13|Q9HY13_PSEAE Uncharacterized protein OS=Pseudomonas aeruginosa (strain ATCC 15692 / PAO1 / 1C / PRS 101 / LMG 12228) GN=PA3613 PE=4 SV=1	1	1	1	1	1.9	1.9	1.9	88.378	801	801	0.010204	5.8437	5066500	2				78	342	TRUE	355	674;675	1372;1373	1373
tr|Q9HY81|Q9HY81_PSEAE	tr|Q9HY81|Q9HY81_PSEAE	3	3	3	>tr|Q9HY81|Q9HY81_PSEAE Probable peroxidase OS=Pseudomonas aeruginosa (strain ATCC 15692 / PAO1 / 1C / PRS 101 / LMG 12228) GN=PA3529 PE=1 SV=1	1	3	3	3	15.5	15.5	15.5	21.822	200	200	0	26.931	21713000	8				79	67;298;335	True;True;True	70;309;348	120;121;580;650;651	218;219;1120;1261;1262;1263;1264;1265	219;1120;1264
tr|Q9HYT5|Q9HYT5_PSEAE	tr|Q9HYT5|Q9HYT5_PSEAE	4	4	4	>tr|Q9HYT5|Q9HYT5_PSEAE Uncharacterized protein OS=Pseudomonas aeruginosa (strain ATCC 15692 / PAO1 / 1C / PRS 101 / LMG 12228) GN=PA3309 PE=3 SV=1	1	4	4	4	33.1	33.1	33.1	16.496	151	151	0	32.571	40135000	9				80	155;179;241;378	True;True;True;True	161;187;250;391	281;327;328;470;471;747;748	500;571;572;573;876;877;1552;1553;1554	500;571;877;1552
tr|Q9HZK4|Q9HZK4_PSEAE	tr|Q9HZK4|Q9HZK4_PSEAE	5	5	5	>tr|Q9HZK4|Q9HZK4_PSEAE Glyceraldehyde-3-phosphate dehydrogenase OS=Pseudomonas aeruginosa (strain ATCC 15692 / PAO1 / 1C / PRS 101 / LMG 12228) GN=PA3001 PE=3 SV=1	1	5	5	5	20	20	20	50.111	461	461	0	48.789	17846000	7				81	65;217;318;388;397	True;True;True;True;True	68;225;329;401;410	117;423;617;618;765;783;784	213;780;1182;1183;1578;1609;1610	213;780;1182;1578;1609
tr|Q9HZP2|Q9HZP2_PSEAE	tr|Q9HZP2|Q9HZP2_PSEAE	1	1	1	>tr|Q9HZP2|Q9HZP2_PSEAE Uncharacterized protein OS=Pseudomonas aeruginosa (strain ATCC 15692 / PAO1 / 1C / PRS 101 / LMG 12228) GN=PA2956 PE=4 SV=1	1	1	1	1	5.4	5.4	5.4	33.566	298	298	1	-2	0	1	+			82	282	TRUE	292	531	977	977	18	1
tr|Q9I056|Q9I056_PSEAE	tr|Q9I056|Q9I056_PSEAE	1	1	1	>tr|Q9I056|Q9I056_PSEAE Carboxypeptidase G2 OS=Pseudomonas aeruginosa (strain ATCC 15692 / PAO1 / 1C / PRS 101 / LMG 12228) GN=cpg2 PE=4 SV=1	1	1	1	1	3.4	3.4	3.4	44.007	412	412	0.010526	5.8829	490120	1				83	265	TRUE	274	508	938	938
tr|Q9I0L4|Q9I0L4_PSEAE	tr|Q9I0L4|Q9I0L4_PSEAE	1	1	1	>tr|Q9I0L4|Q9I0L4_PSEAE Isocitrate dehydrogenase OS=Pseudomonas aeruginosa (strain ATCC 15692 / PAO1 / 1C / PRS 101 / LMG 12228) GN=idh PE=4 SV=1	1	1	1	1	1.5	1.5	1.5	81.633	741	741	0.010417	5.8706	730400	1				84	177	TRUE	185	325	569	569
tr|Q9I0L5|Q9I0L5_PSEAE	tr|Q9I0L5|Q9I0L5_PSEAE	5	5	5	>tr|Q9I0L5|Q9I0L5_PSEAE Isocitrate dehydrogenase [NADP] OS=Pseudomonas aeruginosa (strain ATCC 15692 / PAO1 / 1C / PRS 101 / LMG 12228) GN=icd PE=3 SV=1	1	5	5	5	16.5	16.5	16.5	45.577	418	418	0	41.112	27241000	13				85	39;141;300;392;416	True;True;True;True;True	41;146;311;405;430	64;251;252;583;773;774;775;776;818	131;424;425;426;1124;1594;1595;1596;1597;1598;1599;1600;1676	131;424;1124;1594;1676
tr|Q9I0T1|Q9I0T1_PSEAE	tr|Q9I0T1|Q9I0T1_PSEAE	7	7	7	>tr|Q9I0T1|Q9I0T1_PSEAE Probable acyl-CoA thiolase OS=Pseudomonas aeruginosa (strain ATCC 15692 / PAO1 / 1C / PRS 101 / LMG 12228) GN=PA2553 PE=3 SV=1	1	7	7	7	22.2	22.2	22.2	41.4	396	396	0	59.865	21733000	13				86	83;88;193;213;257;354;356	True;True;True;True;True;True;True	88;93;201;221;266;367;369	153;154;164;165;378;417;495;704;706;707;708	269;270;271;295;296;715;716;774;915;1469;1471;1472;1473	269;296;716;774;915;1469;1472
tr|Q9I1E8|Q9I1E8_PSEAE	tr|Q9I1E8|Q9I1E8_PSEAE	1	1	1	>tr|Q9I1E8|Q9I1E8_PSEAE Uncharacterized protein OS=Pseudomonas aeruginosa (strain ATCC 15692 / PAO1 / 1C / PRS 101 / LMG 12228) GN=PA2330 PE=4 SV=1	1	1	1	1	3.9	3.9	3.9	37.68	355	355	0.010753	5.8961	0	1				87	221	TRUE	229	432	814	814
tr|Q9I1U4|Q9I1U4_PSEAE	tr|Q9I1U4|Q9I1U4_PSEAE	1	1	1	>tr|Q9I1U4|Q9I1U4_PSEAE Uncharacterized protein OS=Pseudomonas aeruginosa (strain ATCC 15692 / PAO1 / 1C / PRS 101 / LMG 12228) GN=PA2171 PE=4 SV=1	1	1	1	1	9	9	9	18.098	156	156	0.01	5.8051	4065400	1				88	288	TRUE	299	566	1106	1106
tr|Q9I246|Q9I246_PSEAE	tr|Q9I246|Q9I246_PSEAE	10	10	10	>tr|Q9I246|Q9I246_PSEAE Probable carbamoyl transferase OS=Pseudomonas aeruginosa (strain ATCC 15692 / PAO1 / 1C / PRS 101 / LMG 12228) GN=PA2069 PE=4 SV=1	1	10	10	10	23.3	23.3	23.3	63.382	574	574	0	94.442	57544000	31				89	73;124;156;161;189;237;303;317;324;329	True;True;True;True;True;True;True;True;True;True	76;129;162;167;197;246;314;328;336;341	132;221;222;282;283;290;373;374;463;464;589;590;613;614;615;616;632;633;640;641	236;368;369;501;502;509;708;709;710;711;865;866;1134;1135;1136;1137;1138;1139;1175;1176;1177;1178;1179;1180;1181;1215;1216;1217;1218;1225;1226	236;369;502;509;711;865;1134;1175;1215;1225
tr|Q9I297|Q9I297_PSEAE	tr|Q9I297|Q9I297_PSEAE	2	2	2	>tr|Q9I297|Q9I297_PSEAE Methylcrotonyl-CoA carboxylase, beta-subunit OS=Pseudomonas aeruginosa (strain ATCC 15692 / PAO1 / 1C / PRS 101 / LMG 12228) GN=liuB PE=1 SV=1	1	2	2	2	11	11	11	57.433	535	535	0	12.224	783250	2				90	104;236	True;True	109;245	189;462	324;864	324;864
tr|Q9I299|Q9I299_PSEAE	tr|Q9I299|Q9I299_PSEAE	16	16	16	>tr|Q9I299|Q9I299_PSEAE Methylcrotonyl-CoA carboxylase, alpha-subunit (Biotin-containing) OS=Pseudomonas aeruginosa (strain ATCC 15692 / PAO1 / 1C / PRS 101 / LMG 12228) GN=liuD PE=1 SV=1	1	16	16	16	34.4	34.4	34.4	71.282	655	655	0	126.62	147240000	41				91	32;37;84;90;126;157;169;170;176;212;227;234;263;352;409;410	True;True;True;True;True;True;True;True;True;True;True;True;True;True;True;True	34;39;89;95;131;163;176;177;184;220;235;242;243;272;365;423;424	52;53;54;55;61;62;155;156;167;225;284;285;306;307;308;309;310;323;324;415;416;440;458;459;460;504;505;699;700;805;806;807;808	113;114;115;116;117;118;119;120;127;128;272;273;274;298;374;375;503;504;542;543;544;545;546;547;548;567;568;772;773;828;860;861;862;930;931;1458;1459;1460;1657;1658;1659;1660;1661	119;127;272;298;374;504;545;547;568;773;828;861;931;1458;1658;1659	19	413
tr|Q9I2A9|Q9I2A9_PSEAE	tr|Q9I2A9|Q9I2A9_PSEAE	1	1	1	>tr|Q9I2A9|Q9I2A9_PSEAE DhcB, dehydrocarnitine CoA transferase, subunit B OS=Pseudomonas aeruginosa (strain ATCC 15692 / PAO1 / 1C / PRS 101 / LMG 12228) GN=dhcB PE=4 SV=1	1	1	1	1	11	11	11	23.187	218	218	0	6.2117	1836000	4				92	139	TRUE	144	248;249	419;420;421;422	419
tr|Q9I2R2|Q9I2R2_PSEAE	tr|Q9I2R2|Q9I2R2_PSEAE	2	2	2	>tr|Q9I2R2|Q9I2R2_PSEAE Probable oxidoreductase OS=Pseudomonas aeruginosa (strain ATCC 15692 / PAO1 / 1C / PRS 101 / LMG 12228) GN=PA1833 PE=4 SV=1	1	2	2	2	7.3	7.3	7.3	34.551	330	330	0	10.877	1688400	1				93	81;226	True;True	86;234	150;439	265;827	265;827
tr|Q9I2W9|Q9I2W9_PSEAE	tr|Q9I2W9|Q9I2W9_PSEAE	1	1	1	>tr|Q9I2W9|Q9I2W9_PSEAE Phosphoenolpyruvate synthase OS=Pseudomonas aeruginosa (strain ATCC 15692 / PAO1 / 1C / PRS 101 / LMG 12228) GN=ppsA PE=3 SV=1	1	1	1	1	1.6	1.6	1.6	85.816	791	791	0	9.8459	1376300	1				94	108	TRUE	113	197	338	338
tr|Q9I3D3|Q9I3D3_PSEAE	tr|Q9I3D3|Q9I3D3_PSEAE	5	5	5	>tr|Q9I3D3|Q9I3D3_PSEAE 2-oxoglutarate dehydrogenase (E1 subunit) OS=Pseudomonas aeruginosa (strain ATCC 15692 / PAO1 / 1C / PRS 101 / LMG 12228) GN=sucA PE=4 SV=1	1	5	5	5	8.2	8.2	8.2	105.88	943	943	0	38.724	17683000	13				95	138;247;248;267;274	True;True;True;True;True	143;256;257;276;284	247;480;481;482;483;511;512;522	418;889;890;891;892;893;894;941;942;943;944;945;968	418;889;891;941;968
tr|Q9I3D4|Q9I3D4_PSEAE	tr|Q9I3D4|Q9I3D4_PSEAE	4	4	4	>tr|Q9I3D4|Q9I3D4_PSEAE Succinate dehydrogenase (B subunit) OS=Pseudomonas aeruginosa (strain ATCC 15692 / PAO1 / 1C / PRS 101 / LMG 12228) GN=sdhB PE=4 SV=1	1	4	4	4	20.9	20.9	20.9	26.155	235	235	0	26.061	12121000	6				96	113;260;275;380	True;True;True;True	118;269;285;393	205;206;500;523;750;751	350;351;924;969;1557;1558	350;924;969;1557
tr|Q9I3D5|Q9I3D5_PSEAE	tr|Q9I3D5|Q9I3D5_PSEAE	5	5	5	>tr|Q9I3D5|Q9I3D5_PSEAE Succinate dehydrogenase flavoprotein subunit OS=Pseudomonas aeruginosa (strain ATCC 15692 / PAO1 / 1C / PRS 101 / LMG 12228) GN=sdhA PE=3 SV=1	1	5	5	5	11.5	11.5	11.5	63.531	590	590	0	53.028	38854000	21				97	133;163;164;194;222	True;True;True;True;True	138;169;170;202;230	234;235;295;296;297;298;379;433;434	385;386;387;515;516;517;518;519;520;521;522;523;524;525;526;717;815;816;817;818;819	386;517;524;717;816
tr|Q9I5E3|Q9I5E3_PSEAE	tr|Q9I5E3|Q9I5E3_PSEAE	1	1	1	>tr|Q9I5E3|Q9I5E3_PSEAE Citrate synthase OS=Pseudomonas aeruginosa (strain ATCC 15692 / PAO1 / 1C / PRS 101 / LMG 12228) GN=prpC PE=3 SV=1	1	1	1	1	3.7	3.7	3.7	41.689	375	375	0	7.4471	618440	1				98	173	TRUE	180	314	552	552
tr|Q9I5F6|Q9I5F6_PSEAE	tr|Q9I5F6|Q9I5F6_PSEAE	2	2	2	>tr|Q9I5F6|Q9I5F6_PSEAE Bifunctional protein PutA OS=Pseudomonas aeruginosa (strain ATCC 15692 / PAO1 / 1C / PRS 101 / LMG 12228) GN=putA PE=3 SV=1	1	2	2	2	2.8	2.8	2.8	115.63	1060	1060	0	20.016	963790	2				99	259;386	True;True	268;399	499;763	923;1576	923;1576
tr|Q9I5U9|Q9I5U9_PSEAE	tr|Q9I5U9|Q9I5U9_PSEAE	12	12	12	>tr|Q9I5U9|Q9I5U9_PSEAE Uncharacterized protein OS=Pseudomonas aeruginosa (strain ATCC 15692 / PAO1 / 1C / PRS 101 / LMG 12228) GN=PA0588 PE=4 SV=1	1	12	12	12	22.3	22.3	22.3	73.722	640	640	0	88.472	46057000	20				100	46;80;203;233;238;244;266;269;276;291;395;414	True;True;True;True;True;True;True;True;True;True;True;True	49;85;211;241;247;253;275;278;286;302;408;428	79;149;398;455;456;457;465;466;475;476;509;510;514;524;570;571;780;813;814;815	156;157;264;746;857;858;859;867;868;883;884;939;940;947;970;1110;1111;1606;1670;1671;1672	156;264;746;857;868;883;939;947;970;1110;1606;1670
tr|Q9I689|Q9I689_PSEAE	tr|Q9I689|Q9I689_PSEAE	2	2	2	>tr|Q9I689|Q9I689_PSEAE ATP-dependent RNA helicase RhlE OS=Pseudomonas aeruginosa (strain ATCC 15692 / PAO1 / 1C / PRS 101 / LMG 12228) GN=rhlE PE=3 SV=1	1	2	2	2	4.1	4.1	4.1	70.111	639	639	0	15.3	1080100	2				101	62;178	True;True	65;186	110;326	202;203;570	202;570
tr|Q9I696|Q9I696_PSEAE	tr|Q9I696|Q9I696_PSEAE	1	1	1	>tr|Q9I696|Q9I696_PSEAE Component of chemotactic signal transduction system OS=Pseudomonas aeruginosa (strain ATCC 15692 / PAO1 / 1C / PRS 101 / LMG 12228) GN=chpA PE=4 SV=1	1	1	1	1	0.8	0.8	0.8	268.57	2472	2472	0	6.0469	279150	1				102	393	TRUE	406	777	1601	1601
tr|Q9I6W4|Q9I6W4_PSEAE	tr|Q9I6W4|Q9I6W4_PSEAE	1	1	1	>tr|Q9I6W4|Q9I6W4_PSEAE Uncharacterized protein OS=Pseudomonas aeruginosa (strain ATCC 15692 / PAO1 / 1C / PRS 101 / LMG 12228) GN=PA0168 PE=4 SV=1	1	1	1	1	8.2	8.2	8.2	20.898	196	196	1	-2	1143100	1	+			103	279	TRUE	289	528	974	974	20	1
tr|Q9I6Z3|Q9I6Z3_PSEAE	tr|Q9I6Z3|Q9I6Z3_PSEAE	7	7	7	>tr|Q9I6Z3|Q9I6Z3_PSEAE Alkyl hydroperoxide reductase subunit C OS=Pseudomonas aeruginosa (strain ATCC 15692 / PAO1 / 1C / PRS 101 / LMG 12228) GN=ahpC PE=4 SV=1	1	7	7	7	51.3	51.3	51.3	20.541	187	187	0	49.997	46151000	15				104	52;110;145;331;350;361;413	True;True;True;True;True;True;True	55;115;150;343;363;374;427	88;89;90;91;200;201;257;644;645;697;715;716;717;812	173;174;175;176;177;341;342;439;1230;1231;1232;1456;1482;1483;1484;1669	176;341;439;1230;1456;1484;1669

[truncated: 3 more sheets: 6-3 proteinGroups Probe 12, 6-3 Sheet1, 6-3 Sheet2]
