# Supplementary material for: Short-chain reactive probes as tools to unravel the Pseudomonas aeruginosa quorum sensing regulon
Source: Royal Society of Chemistry journal article supplement (doi:10.1039/d0sc04444j), 2021-01-01
Supplement: d0sc04444j2.zip [file Experiment 7.xlsx]

## Sheet: Key
Experiment 7	Chemical proteomics with Probe 12: Identification of proteins after incubation and photoaffinity labeling with Probe 12 in wild-type P. aeruginosa strain PAO1
Experimental methods	Yellow, Green and Blue sheets are independent biological replicates: Bacteria were grown, harvested, lysed, the lysates were incubated with C4HSL/Probe 12 in triplicates and labeled, downstream processed, streptavidin affinity enriched and trypticaly digested on the same day. StageTips desalting was done on the next day and LC-MS/MS analysis was performed later
Excel sheets content
7-1 proteinGroups C4HSL-1	Experiment 7 repeat 1 Raw data results of C4HSL control labeling
7-1 proteinGroups Probe 12	Experiment 7 repeat 1 Raw data results of Probe 12 labeling
7-1 Sheet1	Experiment 7 repeat 1: C4HSL results and unique Probe 12 results (C4HSL hits are subtracted)
7-1 Sheet2	Experiment 7 repeat 1: Filtered data of proteins for Probe 12 labeling which retain razor+unique peptides requirement of >1 for each replicate (filled with green)
For Green and Blue sheets-same as above only repeat experiment number changes (7-2, 7-3)

## Sheet: 7-1 proteinGroups C4HSL-1
Protein IDs	Majority protein IDs	Peptide counts (all)	Peptide counts (razor+unique)	Peptide counts (unique)	Fasta headers	Number of proteins	Peptides	Razor + unique peptides	Unique peptides	Sequence coverage [%]	Unique + razor sequence coverage [%]	Unique sequence coverage [%]	Mol. weight [kDa]	Sequence length	Sequence lengths	Q-value	Score	Intensity	MS/MS Count	Only identified by site	Reverse	Potential contaminant	id	Peptide IDs	Peptide is razor	Mod. peptide IDs	Evidence IDs	MS/MS IDs	Best MS/MS	Oxidation (M) site IDs	Oxidation (M) site positions
CON__ENSEMBL:ENSBTAP00000038253;CON__Q9R0H5;CON__Q6NXH9;CON__Q6IFZ6;CON__Q7Z794	CON__ENSEMBL:ENSBTAP00000038253;CON__Q9R0H5;CON__Q6NXH9;CON__Q6IFZ6;CON__Q7Z794	2;1;1;1;1	1;0;0;0;0	1;0;0;0;0	>ENSEMBL:ENSBTAP00000038253 (Bos taurus) 63 kDa protein;>Q9R0H5 SWISS-PROT:Q9R0H5 Tax_Id=10090 Gene_Symbol=Krt71 Keratin, type II cytoskeletal 6G;>Q6NXH9 TREMBL:Q6NXH9 Tax_Id=10090 Gene_Symbol=Krt73 Keratin 73;>Q6IFZ6 SWISS-PROT:Q6IFZ6 Tax_Id=10090 Gene_Sy	5	2	1	1	4	2	2	63.165	606	606;524;539;572;578	0.0060606	5.7749	1934100	1			+	0	197;479	False;True	220;521	367;368;863	633;634;635;636;1507	636;1507
CON__P00761	CON__P00761	4	4	4	>P00761 SWISS-PROT:P00761|TRYP_PIG Trypsin - Sus scrofa (Pig).	1	4	4	4	25.1	25.1	25.1	24.409	231	231	0	65.051	947880000	82			+	1	310;398;446;627	True;True;True;True	341;342;433;482;681	546;547;548;549;550;551;715;716;717;718;801;802;1163;1164	898;899;900;901;902;903;904;905;906;907;908;909;1235;1236;1237;1238;1239;1240;1241;1242;1243;1244;1245;1246;1247;1248;1249;1250;1251;1252;1253;1254;1255;1256;1257;1258;1259;1260;1261;1399;1400;1401;1402;1403;1404;1405;1406;1407;1408;2144;2145;2146;2147;2148;2149;2150;2151;2152;2153;2154;2155;2156;2157;2158;2159;2160;2161;2162;2163;2164;2165;2166;2167;2168;2169;2170;2171;2172;2173;2174;2175;2176	905;1245;1400;2168	0	94
CON__P02535-1;CON__P13645	CON__P02535-1;CON__P13645	1;1	1;1	1;1	>P02535-1 SWISS-PROT:P02535-1 Tax_Id=10090 Gene_Symbol=Krt10 Isoform 1 of Keratin, type I cytoskeletal 10;>P13645 SWISS-PROT:P13645 Tax_Id=9606 Gene_Symbol=KRT10 Keratin, type I cytoskeletal 10	2	1	1	1	1.6	1.6	1.6	57.769	570	570;593	0	6.2255	1296800	2			+	2	390	TRUE	425	701;702	1213;1214	1213
CON__P04264;CON__P35908;CON__Q8BGZ7;CON__P50446;CON__Q922U2;CON__Q5XQN5	CON__P04264;CON__P35908	4;2;1;1;1;1	4;2;1;1;1;1	3;1;1;1;1;1	>P04264 SWISS-PROT:P04264 Tax_Id=9606 Gene_Symbol=KRT1 Keratin, type II cytoskeletal 1;>P35908 SWISS-PROT:P35908 Tax_Id=9606 Gene_Symbol=KRT2 Keratin, type II cytoskeletal 2 epidermal	6	4	4	3	6.5	6.5	4.7	66.017	644	644;645;551;553;580;601	0	41.432	10897000	7			+	3	197;287;557;720	True;True;True;True	220;316;608;779	367;368;508;1027;1028;1347	633;634;635;636;849;1824;1825;2504	636;849;1825;2504
CON__P07477	CON__P07477	1	1	1	>P07477 SWISS-PROT:P07477 Tax_Id=9606 Gene_Symbol=PRSS1 Trypsin-1 precursor	1	1	1	1	8.1	8.1	8.1	26.558	247	247	0.0062112	5.7952	6990100	2			+	4	399	TRUE	434	719	1262;1263	1262
CON__Streptavidin	CON__Streptavidin	5	5	5	>Streptavidin (S.avidinii)	1	5	5	5	43.1	43.1	43.1	16.622	160	160	0	115.07	1379300000	314			+	5	329;330;484;570;719	True;True;True;True;True	363;364;530;622;778	582;583;584;585;586;587;588;589;590;591;592;593;594;595;596;597;598;599;600;601;602;603;604;605;885;886;887;888;889;890;891;892;893;894;895;896;897;898;899;900;901;902;903;904;905;906;907;1047;1048;1049;1050;1051;1052;1331;1332;1333;1334;1335;1336;1337;1338;1339;1340;1341;1342;1343;1344;1345;1346	954;955;956;957;958;959;960;961;962;963;964;965;966;967;968;969;970;971;972;973;974;975;976;977;978;979;980;981;982;983;984;985;986;987;988;989;990;991;992;993;994;995;996;997;998;999;1000;1001;1002;1003;1004;1005;1006;1007;1008;1009;1010;1011;1012;1013;1014;1015;1016;1017;1018;1019;1020;1021;1022;1023;1024;1025;1026;1027;1028;1029;1030;1031;1032;1033;1034;1035;1036;1037;1038;1039;1040;1041;1042;…	1017;1077;1558;1900;2501
REV__tr|Q9HXW2|Q9HXW2_PSEAE	REV__tr|Q9HXW2|Q9HXW2_PSEAE	1	1	1	>tr|Q9HXW2|Q9HXW2_PSEAE Probable transcriptional regulator OS=Pseudomonas aeruginosa (strain ATCC 15692 / PAO1 / 1C / PRS 101 / LMG 12228) GN=PA3678 PE=4 SV=1	1	1	1	1	0	0	0	23.15	212	212	0.0064103	5.9062	109290000	11		+		6	364	TRUE	398	660;661	1156;1157;1158;1159;1160;1161;1162;1163;1164;1165;1166	1160
sp|G3XD23|WBPB_PSEAE	sp|G3XD23|WBPB_PSEAE	3	3	3	>sp|G3XD23|WBPB_PSEAE UDP-N-acetyl-2-amino-2-deoxy-D-glucuronate oxidase OS=Pseudomonas aeruginosa (strain ATCC 15692 / PAO1 / 1C / PRS 101 / LMG 12228) GN=wbpB PE=1 SV=1	1	3	3	3	12.7	12.7	12.7	35.717	316	316	0	19.146	7614400	6				7	2;466;539	True;True;True	2;503;588	2;3;834;835;996	2;3;4;1464;1465;1787	2;1465;1787
sp|G3XD61|WBPI_PSEAE	sp|G3XD61|WBPI_PSEAE	1	1	1	>sp|G3XD61|WBPI_PSEAE UDP-2,3-diacetamido-2,3-dideoxy-D-glucuronate 2-epimerase OS=Pseudomonas aeruginosa (strain ATCC 15692 / PAO1 / 1C / PRS 101 / LMG 12228) GN=wbpI PE=1 SV=1	1	1	1	1	5.6	5.6	5.6	38.907	354	354	0.0063694	5.9041	2077800	1				8	93	TRUE	102	179	348	348
sp|G3XD94|UGND_PSEAE	sp|G3XD94|UGND_PSEAE	2	2	2	>sp|G3XD94|UGND_PSEAE UDP-N-acetyl-D-glucosamine 6-dehydrogenase OS=Pseudomonas aeruginosa (strain ATCC 15692 / PAO1 / 1C / PRS 101 / LMG 12228) GN=wbpA PE=1 SV=1	1	2	2	2	7.1	7.1	7.1	48.155	436	436	0	13.123	2596800	3				9	84;187	True;True	93;209	164;165;354	325;326;620	325;620
sp|O52759|RS4_PSEAE	sp|O52759|RS4_PSEAE	2	2	2	>sp|O52759|RS4_PSEAE 30S ribosomal protein S4 OS=Pseudomonas aeruginosa (strain ATCC 15692 / PAO1 / 1C / PRS 101 / LMG 12228) GN=rpsD PE=3 SV=2	1	2	2	2	12.6	12.6	12.6	23.277	206	206	0	23.066	11722000	5				10	46;444	True;True	49;480	88;89;797;798	218;219;1394;1395;1396	218;1395
sp|O52760|RPOA_PSEAE	sp|O52760|RPOA_PSEAE	4	4	4	>sp|O52760|RPOA_PSEAE DNA-directed RNA polymerase subunit alpha OS=Pseudomonas aeruginosa (strain ATCC 15692 / PAO1 / 1C / PRS 101 / LMG 12228) GN=rpoA PE=3 SV=2	1	4	4	4	12.3	12.3	12.3	36.649	333	333	0	27.459	2946200	4				11	20;267;341;687	True;True;True;True	20;293;375;746	36;476;619;1285	80;804;1096;2382	80;804;1096;2382
sp|O52762|CATA_PSEAE	sp|O52762|CATA_PSEAE	11	11	11	>sp|O52762|CATA_PSEAE Catalase OS=Pseudomonas aeruginosa (strain ATCC 15692 / PAO1 / 1C / PRS 101 / LMG 12228) GN=katA PE=1 SV=1	1	11	11	11	32.4	32.4	32.4	55.588	482	482	0	111.51	35786000	24				12	123;126;207;213;248;249;392;411;453;708;735	True;True;True;True;True;True;True;True;True;True;True	137;141;230;236;272;273;274;427;446;489;767;794	246;251;382;389;442;443;444;445;446;447;704;705;738;739;740;811;812;1316;1370	467;476;655;665;739;740;741;742;743;744;745;746;1217;1218;1219;1220;1294;1295;1296;1424;1425;1426;2425;2536	467;476;655;665;739;745;1219;1294;1424;2425;2536	1	30
sp|O54439|ACP1_PSEAE	sp|O54439|ACP1_PSEAE	2	2	2	>sp|O54439|ACP1_PSEAE Acyl carrier protein 1 OS=Pseudomonas aeruginosa (strain ATCC 15692 / PAO1 / 1C / PRS 101 / LMG 12228) GN=acpP1 PE=3 SV=4	1	2	2	2	32.1	32.1	32.1	8.7406	78	78	0	17.248	3619000	3				13	342;344	True;True	376;378	620;623	1097;1098;1103	1097;1103
sp|O68822|AMPA_PSEAE	sp|O68822|AMPA_PSEAE	7	7	7	>sp|O68822|AMPA_PSEAE Cytosol aminopeptidase OS=Pseudomonas aeruginosa (strain ATCC 15692 / PAO1 / 1C / PRS 101 / LMG 12228) GN=pepA PE=3 SV=1	1	7	7	7	19	19	19	52.331	495	495	0	66.428	41823000	22				14	97;147;241;379;419;427;646	True;True;True;True;True;True;True	108;163;264;414;454;462;702	192;193;286;287;430;431;685;686;756;757;771;772;1197;1198	361;362;536;537;724;725;726;1195;1196;1327;1328;1329;1330;1347;1348;1349;1350;1351;1352;1353;2228;2229	362;536;726;1195;1327;1350;2229	2	182
sp|O69754|PHZF_PSEAE	sp|O69754|PHZF_PSEAE	3	3	3	>sp|O69754|PHZF_PSEAE Trans-2,3-dihydro-3-hydroxyanthranilate isomerase OS=Pseudomonas aeruginosa (strain ATCC 15692 / PAO1 / 1C / PRS 101 / LMG 12228) GN=phzF1 PE=3 SV=2	1	3	3	3	26.6	26.6	26.6	30.342	278	278	0	24.536	7115700	4				15	292;471;686	True;True;True	322;510;745	517;847;1284	862;863;1478;2381	862;1478;2381
sp|O82850|RS2_PSEAE	sp|O82850|RS2_PSEAE	1	1	1	>sp|O82850|RS2_PSEAE 30S ribosomal protein S2 OS=Pseudomonas aeruginosa (strain ATCC 15692 / PAO1 / 1C / PRS 101 / LMG 12228) GN=rpsB PE=3 SV=2	1	1	1	1	5.3	5.3	5.3	27.336	246	246	0	7.2205	237620	1				16	116	TRUE	129	229	424	424
sp|O86428|ILVE_PSEAE	sp|O86428|ILVE_PSEAE	2	2	2	>sp|O86428|ILVE_PSEAE Branched-chain-amino-acid aminotransferase OS=Pseudomonas aeruginosa (strain ATCC 15692 / PAO1 / 1C / PRS 101 / LMG 12228) GN=ilvE PE=1 SV=2	1	2	2	2	8.1	8.1	8.1	34.084	307	307	0	14.261	5188000	2				17	103;507	True;True	115;555	203;204;946	378;379;1704	379;1704
sp|P04739|FMPO_PSEAE	sp|P04739|FMPO_PSEAE	4	4	4	>sp|P04739|FMPO_PSEAE Fimbrial protein OS=Pseudomonas aeruginosa (strain ATCC 15692 / PAO1 / 1C / PRS 101 / LMG 12228) GN=pilA PE=1 SV=1	1	4	4	4	36.2	36.2	36.2	15.512	149	149	0	44.32	20395000	15				18	299;544;571;612	True;True;True;True	330;595;623;624;665	527;528;529;1008;1009;1053;1054;1140;1141	874;875;876;877;878;879;880;1801;1802;1803;1804;1927;1928;2112;2113	874;1801;1928;2113	3	141
sp|P05384|DBHB_PSEAE	sp|P05384|DBHB_PSEAE	2	2	2	>sp|P05384|DBHB_PSEAE DNA-binding protein HU-beta OS=Pseudomonas aeruginosa (strain ATCC 15692 / PAO1 / 1C / PRS 101 / LMG 12228) GN=hupB PE=1 SV=3	1	2	2	2	32.2	32.2	32.2	9.0865	90	90	0	18.304	11245000	5				19	49;545	True;True	52;596	93;94;1010	225;226;227;228;1805	226;1805
sp|P08308|OTCC_PSEAE	sp|P08308|OTCC_PSEAE	8	8	8	>sp|P08308|OTCC_PSEAE Ornithine carbamoyltransferase, catabolic OS=Pseudomonas aeruginosa (strain ATCC 15692 / PAO1 / 1C / PRS 101 / LMG 12228) GN=arcB PE=1 SV=3	1	8	8	8	28	28	28	38.108	336	336	0	55.825	67969000	36				20	43;166;183;451;482;494;502;733	True;True;True;True;True;True;True;True	46;184;185;186;204;205;487;527;528;540;548;549;792	83;318;319;320;321;322;346;347;348;349;809;879;880;881;882;923;924;935;936;937;938;1367	212;213;572;573;574;575;576;606;607;608;609;610;611;612;613;614;615;1421;1422;1548;1549;1550;1551;1552;1553;1554;1670;1671;1672;1689;1690;1691;1692;1693;2532;2533	212;575;607;1421;1549;1671;1692;2533	4;5;6;7;8	101;146;169;258;261
sp|P09591|EFTU_PSEAE	sp|P09591|EFTU_PSEAE	15	15	15	>sp|P09591|EFTU_PSEAE Elongation factor Tu OS=Pseudomonas aeruginosa (strain ATCC 15692 / PAO1 / 1C / PRS 101 / LMG 12228) GN=tufA PE=1 SV=2	1	15	15	15	48.1	48.1	48.1	43.369	397	397	0	153.53	539510000	202				21	15;29;40;107;118;119;157;190;240;265;456;481;528;610;680	True;True;True;True;True;True;True;True;True;True;True;True;True;True;True	15;30;42;43;119;131;132;133;174;212;263;291;492;524;525;526;576;663;738	27;54;55;73;74;75;76;77;78;79;211;212;233;234;235;236;237;238;239;240;241;303;357;426;427;428;429;471;472;473;474;817;818;870;871;872;873;874;875;876;877;878;978;979;1136;1137;1270;1271	67;105;106;107;108;109;110;111;112;113;114;115;116;117;118;119;147;148;149;150;151;152;153;154;155;156;157;158;159;160;161;162;163;164;165;166;167;168;169;170;171;172;173;174;175;176;177;178;179;180;181;182;183;184;185;186;187;188;189;190;191;192;193;194;195;196;197;198;199;200;201;202;203;204;205;206;207;208;399;400;429;430;431;432;433;434;435;436;437;438;439;440;441;442;443;444;445;446;447;448;…	67;105;148;400;452;457;555;623;717;797;1432;1545;1758;2106;2343	9;10;11;12;13	152;177;216;362;372
sp|P11221|OPRI_PSEAE	sp|P11221|OPRI_PSEAE	2	2	2	>sp|P11221|OPRI_PSEAE Major outer membrane lipoprotein OS=Pseudomonas aeruginosa (strain ATCC 15692 / PAO1 / 1C / PRS 101 / LMG 12228) GN=oprI PE=3 SV=1	1	2	2	2	25.3	25.3	25.3	8.8348	83	83	0	14.703	2368400	10				22	353;449	True;True	387;485	636;637;806;807	1118;1119;1412;1413;1414;1415;1416;1417;1418;1419	1119;1413
sp|P11436|AMIE_PSEAE	sp|P11436|AMIE_PSEAE	3	3	3	>sp|P11436|AMIE_PSEAE Aliphatic amidase OS=Pseudomonas aeruginosa (strain ATCC 15692 / PAO1 / 1C / PRS 101 / LMG 12228) GN=amiE PE=1 SV=2	1	3	3	3	13	13	13	38.494	346	346	0	18.106	3763100	2				23	69;266;355	True;True;True	76;292;389	136;475;640	288;803;1125	288;803;1125
sp|P13794|PORF_PSEAE	sp|P13794|PORF_PSEAE	7	7	7	>sp|P13794|PORF_PSEAE Outer membrane porin F OS=Pseudomonas aeruginosa (strain ATCC 15692 / PAO1 / 1C / PRS 101 / LMG 12228) GN=oprF PE=1 SV=1	1	7	7	7	24.6	24.6	24.6	37.639	350	350	0	71.59	112650000	52				24	134;496;530;534;631;657;672	True;True;True;True;True;True;True	150;542;578;582;685;713;729	263;264;926;982;983;987;988;1169;1170;1220;1245;1246;1247;1248	493;494;495;496;497;498;499;500;501;502;503;504;505;506;507;1674;1764;1765;1766;1767;1768;1772;1773;1774;1775;1776;2184;2185;2186;2187;2188;2189;2190;2191;2192;2259;2290;2291;2292;2293;2294;2295;2296;2297;2298;2299;2300;2301;2302;2303;2304;2305	494;1674;1767;1773;2185;2259;2300	14	266
sp|P13981|ARCA_PSEAE	sp|P13981|ARCA_PSEAE	19	19	19	>sp|P13981|ARCA_PSEAE Arginine deiminase OS=Pseudomonas aeruginosa (strain ATCC 15692 / PAO1 / 1C / PRS 101 / LMG 12228) GN=arcA PE=1 SV=2	1	19	19	19	51.4	51.4	51.4	46.435	418	418	0	191.44	219390000	108				25	35;112;122;161;180;237;339;356;357;369;508;514;520;533;579;590;591;656;696	True;True;True;True;True;True;True;True;True;True;True;True;True;True;True;True;True;True;True	37;124;136;178;179;201;260;373;390;391;403;556;562;568;581;632;643;644;712;755	67;220;221;244;245;307;308;309;310;340;341;342;421;422;615;616;641;642;643;667;668;947;948;956;957;967;986;1068;1069;1094;1095;1096;1097;1098;1099;1100;1101;1102;1103;1104;1219;1299;1300	138;411;412;413;414;415;416;461;462;463;464;465;466;559;560;561;562;596;597;598;599;600;601;706;707;708;1090;1091;1126;1127;1128;1129;1172;1173;1174;1705;1706;1707;1708;1709;1710;1724;1725;1726;1727;1728;1729;1730;1731;1743;1771;1943;1944;1945;1946;1947;1948;2015;2016;2017;2018;2019;2020;2021;2022;2023;2024;2025;2026;2027;2028;2029;2030;2031;2032;2033;2034;2035;2036;2037;2038;2039;2040;2041;2042;…	138;411;465;561;600;707;1090;1127;1129;1172;1706;1724;1743;1771;1947;2017;2047;2257;2403	15	316
sp|P13982|ARCC_PSEAE	sp|P13982|ARCC_PSEAE	3	3	3	>sp|P13982|ARCC_PSEAE Carbamate kinase OS=Pseudomonas aeruginosa (strain ATCC 15692 / PAO1 / 1C / PRS 101 / LMG 12228) GN=arcC PE=3 SV=1	1	3	3	3	13.2	13.2	13.2	33.08	310	310	0	24.033	2656700	3				26	37;105;349	True;True;True	39;117;383	70;207;630;631	143;388;389;1112;1113	143;389;1113
sp|P14165|CISY_PSEAE	sp|P14165|CISY_PSEAE	1	1	1	>sp|P14165|CISY_PSEAE Citrate synthase OS=Pseudomonas aeruginosa (strain ATCC 15692 / PAO1 / 1C / PRS 101 / LMG 12228) GN=gltA PE=3 SV=2	1	1	1	1	2.3	2.3	2.3	47.694	428	428	0.0055556	5.5641	778240	1				27	264	TRUE	290	470	790	790
sp|P28810|MMSA_PSEAE;tr|Q9I5I2|Q9I5I2_PSEAE	sp|P28810|MMSA_PSEAE;tr|Q9I5I2|Q9I5I2_PSEAE	2;1	2;1	2;1	>sp|P28810|MMSA_PSEAE Methylmalonate-semialdehyde dehydrogenase [acylating] OS=Pseudomonas aeruginosa (strain ATCC 15692 / PAO1 / 1C / PRS 101 / LMG 12228) GN=mmsA PE=1 SV=2;>tr|Q9I5I2|Q9I5I2_PSEAE Probable aldehyde dehydrogenase OS=Pseudomonas aeruginosa	2	2	2	2	6.8	6.8	6.8	53.663	497	497;502	0	20.68	1765800	2				28	368;417	True;True	402;452	666;754	1171;1325	1171;1325
sp|P30718|CH60_PSEAE	sp|P30718|CH60_PSEAE	19	19	19	>sp|P30718|CH60_PSEAE 60 kDa chaperonin OS=Pseudomonas aeruginosa (strain ATCC 15692 / PAO1 / 1C / PRS 101 / LMG 12228) GN=groL PE=1 SV=3	1	19	19	19	51.9	51.9	51.9	57.085	547	547	0	161.81	135640000	75				29	9;33;38;58;64;65;94;95;96;114;171;192;220;263;370;476;522;546;638	True;True;True;True;True;True;True;True;True;True;True;True;True;True;True;True;True;True;True	9;34;35;40;61;69;70;71;103;104;105;106;107;126;127;191;192;214;215;243;289;404;517;518;570;597;692;693	15;16;61;62;63;64;65;71;107;122;123;124;125;126;127;128;180;181;182;183;184;185;186;187;188;189;190;191;224;225;226;227;328;329;330;331;359;360;361;398;469;669;857;858;859;860;969;970;1011;1180;1181;1182;1183	35;36;37;38;39;40;41;42;125;126;127;128;129;130;131;132;133;134;135;136;144;145;243;263;264;265;266;267;268;269;270;271;272;273;274;275;276;277;349;350;351;352;353;354;355;356;357;358;359;360;419;420;421;422;584;585;586;587;625;626;627;674;789;1175;1497;1498;1499;1500;1501;1502;1503;1745;1746;1806;2202;2203;2204;2205	39;127;144;243;265;272;350;356;360;419;584;627;674;789;1175;1501;1746;1806;2203	16;17;18;19;20;21;22;23	16;69;111;114;233;267;288;389
sp|P37798|ACCC_PSEAE	sp|P37798|ACCC_PSEAE	4	4	4	>sp|P37798|ACCC_PSEAE Biotin carboxylase OS=Pseudomonas aeruginosa (strain ATCC 15692 / PAO1 / 1C / PRS 101 / LMG 12228) GN=accC PE=1 SV=1	1	4	4	4	11.8	11.8	11.8	48.887	449	449	0	26.658	6879800	7				30	485;548;651;655	True;True;True;True	531;599;707;711	908;909;1013;1209;1210;1218	1649;1650;1808;2244;2245;2246;2256	1649;1808;2246;2256
sp|P37799|BCCP_PSEAE	sp|P37799|BCCP_PSEAE	9	9	9	>sp|P37799|BCCP_PSEAE Biotin carboxyl carrier protein of acetyl-CoA carboxylase OS=Pseudomonas aeruginosa (strain ATCC 15692 / PAO1 / 1C / PRS 101 / LMG 12228) GN=accB PE=3 SV=1	1	9	9	9	62.8	62.8	62.8	16.455	156	156	0	131.17	791560000	142				31	7;8;359;360;413;414;433;566;580	True;True;True;True;True;True;True;True;True	7;8;393;394;448;449;469;617;618;633	11;12;13;14;646;647;648;649;650;651;652;653;654;742;743;744;745;746;747;748;749;750;751;783;1039;1040;1041;1042;1070;1071;1072;1073;1074;1075	12;13;14;15;16;17;18;19;20;21;22;23;24;25;26;27;28;29;30;31;32;33;34;1132;1133;1134;1135;1136;1137;1138;1139;1140;1141;1142;1143;1144;1145;1146;1147;1148;1149;1298;1299;1300;1301;1302;1303;1304;1305;1306;1307;1308;1309;1310;1311;1312;1313;1314;1315;1316;1317;1318;1319;1320;1321;1322;1370;1371;1838;1839;1840;1841;1842;1843;1844;1845;1846;1847;1848;1849;1850;1851;1852;1853;1854;1855;1856;1857;1858;…	13;34;1140;1147;1308;1311;1370;1871;1967	24	87
sp|P38100|CARB_PSEAE	sp|P38100|CARB_PSEAE	2	2	2	>sp|P38100|CARB_PSEAE Carbamoyl-phosphate synthase large chain OS=Pseudomonas aeruginosa (strain ATCC 15692 / PAO1 / 1C / PRS 101 / LMG 12228) GN=carB PE=3 SV=3	1	2	2	2	2.5	2.5	2.5	117.33	1073	1073	0	13.179	1784800	2				32	382;600	True;True	417;653	691;1115	1202;2069	1202;2069
sp|P43336|PHHC_PSEAE	sp|P43336|PHHC_PSEAE	4	4	4	>sp|P43336|PHHC_PSEAE Aromatic-amino-acid aminotransferase OS=Pseudomonas aeruginosa (strain ATCC 15692 / PAO1 / 1C / PRS 101 / LMG 12228) GN=phhC PE=3 SV=2	1	4	4	4	15	15	15	43.273	399	399	0	35.899	13285000	9				33	12;296;367;678	True;True;True;True	12;327;401;736	21;523;524;664;665;1266;1267;1268	48;870;871;1169;1170;2337;2338;2339;2340	48;871;1170;2340
sp|P47204|FTSZ_PSEAE	sp|P47204|FTSZ_PSEAE	1	1	1	>sp|P47204|FTSZ_PSEAE Cell division protein FtsZ OS=Pseudomonas aeruginosa (strain ATCC 15692 / PAO1 / 1C / PRS 101 / LMG 12228) GN=ftsZ PE=1 SV=2	1	1	1	1	4.8	4.8	4.8	41.218	394	394	0	11.31	676980	2				34	694	TRUE	753	1296;1297	2397;2398	2397
sp|P53593|SUCC_PSEAE	sp|P53593|SUCC_PSEAE	13	13	13	>sp|P53593|SUCC_PSEAE Succinyl-CoA ligase [ADP-forming] subunit beta OS=Pseudomonas aeruginosa (strain ATCC 15692 / PAO1 / 1C / PRS 101 / LMG 12228) GN=sucC PE=3 SV=2	1	13	13	13	39.9	39.9	39.9	41.542	388	388	0	159.16	98975000	52				35	23;90;99;163;294;304;326;389;393;394;500;525;659	True;True;True;True;True;True;True;True;True;True;True;True;True	23;99;110;181;324;335;359;424;428;429;546;573;715	41;42;172;173;195;196;312;313;519;520;536;537;576;577;700;706;707;708;709;931;932;974;975;1223;1224;1225;1226	87;88;89;90;91;333;334;335;336;337;338;339;340;341;342;364;365;564;565;865;866;867;887;888;944;945;946;947;948;1212;1221;1222;1223;1224;1225;1226;1680;1681;1682;1683;1684;1685;1750;1751;1752;2262;2263;2264;2265;2266;2267;2268	90;336;365;564;865;887;946;1212;1224;1225;1684;1751;2262
sp|P53641|SODF_PSEAE	sp|P53641|SODF_PSEAE	2	2	2	>sp|P53641|SODF_PSEAE Superoxide dismutase [Fe] OS=Pseudomonas aeruginosa (strain ATCC 15692 / PAO1 / 1C / PRS 101 / LMG 12228) GN=sodB PE=3 SV=3	1	2	2	2	13.5	13.5	13.5	21.351	193	193	0	15.099	21291000	8				36	25;608	True;True	25;661	45;46;1132;1133	94;95;96;97;2099;2100;2101;2102	94;2102
sp|P72173|AAT_PSEAE	sp|P72173|AAT_PSEAE	4	4	4	>sp|P72173|AAT_PSEAE Aspartate aminotransferase OS=Pseudomonas aeruginosa (strain ATCC 15692 / PAO1 / 1C / PRS 101 / LMG 12228) GN=aspC PE=3 SV=2	1	4	4	4	12.6	12.6	12.6	43.319	398	398	0	29.967	4492000	3				37	423;639;703;740	True;True;True;True	458;694;762;799	764;1184;1185;1307;1308;1377;1378	1337;2206;2207;2414;2415;2544;2545	1337;2207;2414;2545
sp|Q51342|PUR1_PSEAE	sp|Q51342|PUR1_PSEAE	1	1	1	>sp|Q51342|PUR1_PSEAE Amidophosphoribosyltransferase OS=Pseudomonas aeruginosa (strain ATCC 15692 / PAO1 / 1C / PRS 101 / LMG 12228) GN=purF PE=3 SV=3	1	1	1	1	3.4	3.4	3.4	55.369	501	501	0	6.2281	1506400	1				38	565	TRUE	616	1038	1837	1837
sp|Q51422|SYDND_PSEAE	sp|Q51422|SYDND_PSEAE	3	3	3	>sp|Q51422|SYDND_PSEAE Aspartate--tRNA(Asp/Asn) ligase OS=Pseudomonas aeruginosa (strain ATCC 15692 / PAO1 / 1C / PRS 101 / LMG 12228) GN=aspS PE=1 SV=2	1	3	3	3	6.8	6.8	6.8	66.207	591	591	0	20.995	2750800	7				39	193;332;606	True;True;True	216;366;659	362;607;1127;1128	628;1080;1081;2089;2090;2091;2092	628;1081;2090	25	565
sp|Q51561|RPOB_PSEAE	sp|Q51561|RPOB_PSEAE	10	10	10	>sp|Q51561|RPOB_PSEAE DNA-directed RNA polymerase subunit beta OS=Pseudomonas aeruginosa (strain ATCC 15692 / PAO1 / 1C / PRS 101 / LMG 12228) GN=rpoB PE=3 SV=2	1	10	10	10	10.5	10.5	10.5	150.84	1357	1357	0	76.398	25592000	22				40	36;54;71;260;346;477;529;569;587;685	True;True;True;True;True;True;True;True;True;True	38;57;78;79;286;380;519;577;621;640;744	68;69;101;102;139;140;465;626;861;980;981;1046;1090;1091;1282;1283	139;140;141;142;235;236;237;238;291;292;785;1107;1504;1505;1760;1761;1762;1763;1887;2011;2012;2379;2380	142;235;292;785;1107;1504;1761;1887;2011;2379	26	658
sp|Q51567|SUCD_PSEAE	sp|Q51567|SUCD_PSEAE	6	6	6	>sp|Q51567|SUCD_PSEAE Succinyl-CoA ligase [ADP-forming] subunit alpha OS=Pseudomonas aeruginosa (strain ATCC 15692 / PAO1 / 1C / PRS 101 / LMG 12228) GN=sucD PE=3 SV=2	1	6	6	6	26.8	26.8	26.8	30.266	295	295	0	44.721	26062000	18				41	48;68;129;181;233;551	True;True;True;True;True;True	51;75;145;202;256;602	91;92;133;134;135;257;258;343;344;415;416;1018;1019	221;222;223;224;284;285;286;287;486;487;602;603;604;698;699;1814;1815;1816	222;285;486;604;698;1814
sp|Q59636|NDK_PSEAE	sp|Q59636|NDK_PSEAE	1	1	1	>sp|Q59636|NDK_PSEAE Nucleoside diphosphate kinase OS=Pseudomonas aeruginosa (strain ATCC 15692 / PAO1 / 1C / PRS 101 / LMG 12228) GN=ndk PE=3 SV=2	1	1	1	1	6.3	6.3	6.3	15.592	143	143	0	6.3337	1087200	1				42	510	TRUE	558	950	1712	1712
sp|Q59637|ODP1_PSEAE	sp|Q59637|ODP1_PSEAE	12	12	12	>sp|Q59637|ODP1_PSEAE Pyruvate dehydrogenase E1 component OS=Pseudomonas aeruginosa (strain ATCC 15692 / PAO1 / 1C / PRS 101 / LMG 12228) GN=aceE PE=3 SV=2	1	12	12	12	14.9	14.9	14.9	99.563	882	882	0	76.547	31101000	21				43	113;130;139;160;212;308;335;348;441;552;563;664	True;True;True;True;True;True;True;True;True;True;True;True	125;146;155;177;235;339;369;382;477;603;614;720	222;223;259;272;273;306;387;388;542;543;610;611;629;794;1020;1021;1036;1231;1232	417;418;488;517;518;558;662;663;664;893;894;895;1084;1085;1110;1111;1389;1817;1818;1835;2273;2274	418;488;517;558;664;894;1085;1111;1389;1818;1835;2274
sp|Q59638|ODP2_PSEAE	sp|Q59638|ODP2_PSEAE	5	5	5	>sp|Q59638|ODP2_PSEAE Dihydrolipoyllysine-residue acetyltransferase component of pyruvate dehydrogenase complex OS=Pseudomonas aeruginosa (strain ATCC 15692 / PAO1 / 1C / PRS 101 / LMG 12228) GN=aceF PE=2 SV=2	1	5	5	5	10.6	10.6	10.6	56.708	547	547	0	38.764	8131900	8				44	167;320;400;454;561	True;True;True;True;True	187;352;435;490;612	323;565;720;813;814;1033;1034	577;924;1264;1265;1427;1428;1832;1833	577;924;1264;1428;1833
sp|Q9HT16|ATPF_PSEAE	sp|Q9HT16|ATPF_PSEAE	1	1	1	>sp|Q9HT16|ATPF_PSEAE ATP synthase subunit b OS=Pseudomonas aeruginosa (strain ATCC 15692 / PAO1 / 1C / PRS 101 / LMG 12228) GN=atpF PE=3 SV=1	1	1	1	1	8.3	8.3	8.3	16.956	156	156	0	8.5933	643320	1				45	80	TRUE	88	157	318	318
sp|Q9HT18|ATPA_PSEAE	sp|Q9HT18|ATPA_PSEAE	15	15	15	>sp|Q9HT18|ATPA_PSEAE ATP synthase subunit alpha OS=Pseudomonas aeruginosa (strain ATCC 15692 / PAO1 / 1C / PRS 101 / LMG 12228) GN=atpA PE=3 SV=1	1	15	15	15	34.2	34.2	34.2	55.393	514	514	0	121.05	76744000	34				46	149;162;218;228;314;478;488;527;574;575;582;625;647;692;693	True;True;True;True;True;True;True;True;True;True;True;True;True;True;True	165;180;241;251;346;520;534;575;627;628;635;679;703;751;752	289;290;311;395;396;408;409;555;556;862;914;915;977;1058;1059;1060;1061;1062;1078;1079;1161;1199;1200;1201;1292;1293;1294;1295	539;540;563;671;672;686;687;688;913;914;1506;1659;1660;1754;1932;1933;1934;1935;1936;1985;1986;1987;1988;2142;2230;2231;2232;2233;2234;2235;2392;2393;2394;2395;2396	540;563;671;688;913;1506;1659;1754;1932;1934;1987;2142;2235;2392;2396	27;28	1;157
sp|Q9HT19|ATPG_PSEAE	sp|Q9HT19|ATPG_PSEAE	1	1	1	>sp|Q9HT19|ATPG_PSEAE ATP synthase gamma chain OS=Pseudomonas aeruginosa (strain ATCC 15692 / PAO1 / 1C / PRS 101 / LMG 12228) GN=atpG PE=3 SV=1	1	1	1	1	3.1	3.1	3.1	31.553	286	286	0	7.0312	1001000	1				47	560	TRUE	611	1032	1831	1831
sp|Q9HT20|ATPB_PSEAE	sp|Q9HT20|ATPB_PSEAE	10	10	10	>sp|Q9HT20|ATPB_PSEAE ATP synthase subunit beta OS=Pseudomonas aeruginosa (strain ATCC 15692 / PAO1 / 1C / PRS 101 / LMG 12228) GN=atpD PE=3 SV=1	1	10	10	10	31.9	31.9	31.9	49.499	458	458	0	89.407	31010000	18				48	133;146;203;493;523;553;623;624;643;739	True;True;True;True;True;True;True;True;True;True	149;162;226;539;571;604;676;677;678;699;798	262;285;377;922;971;972;1022;1156;1157;1158;1159;1160;1192;1193;1375;1376	491;492;535;647;1669;1747;1748;1819;2135;2136;2137;2138;2139;2140;2141;2223;2224;2542;2543	492;535;647;1669;1748;1819;2137;2141;2224;2543	29	225
sp|Q9HTD7|ASPA_PSEAE	sp|Q9HTD7|ASPA_PSEAE	1	1	1	>sp|Q9HTD7|ASPA_PSEAE Aspartate ammonia-lyase OS=Pseudomonas aeruginosa (strain ATCC 15692 / PAO1 / 1C / PRS 101 / LMG 12228) GN=aspA PE=3 SV=1	1	1	1	1	5.1	5.1	5.1	51.069	474	474	0	6.3625	500780	1				49	407	TRUE	442	734	1290	1290
sp|Q9HTN8|RL28_PSEAE	sp|Q9HTN8|RL28_PSEAE	1	1	1	>sp|Q9HTN8|RL28_PSEAE 50S ribosomal protein L28 OS=Pseudomonas aeruginosa (strain ATCC 15692 / PAO1 / 1C / PRS 101 / LMG 12228) GN=rpmB PE=3 SV=1	1	1	1	1	12.8	12.8	12.8	9.0655	78	78	0	6.4661	882840	1				50	238	TRUE	261	423	709	709
sp|Q9HTZ7|PCKA_PSEAE	sp|Q9HTZ7|PCKA_PSEAE	1	1	1	>sp|Q9HTZ7|PCKA_PSEAE Phosphoenolpyruvate carboxykinase [ATP] OS=Pseudomonas aeruginosa (strain ATCC 15692 / PAO1 / 1C / PRS 101 / LMG 12228) GN=pckA PE=3 SV=1	1	1	1	1	2.5	2.5	2.5	55.731	513	513	0	6.0276	1017000	1				51	100	TRUE	111	197	366	366
sp|Q9HU21|RMLC_PSEAE	sp|Q9HU21|RMLC_PSEAE	1	1	1	>sp|Q9HU21|RMLC_PSEAE dTDP-4-dehydrorhamnose 3,5-epimerase OS=Pseudomonas aeruginosa (strain ATCC 15692 / PAO1 / 1C / PRS 101 / LMG 12228) GN=rmlC PE=1 SV=1	1	1	1	1	6.6	6.6	6.6	20.766	181	181	0	6.3843	3651500	2				52	374	TRUE	408	675;676	1182;1183	1183
sp|Q9HU56|SECB_PSEAE	sp|Q9HU56|SECB_PSEAE	1	1	1	>sp|Q9HU56|SECB_PSEAE Protein-export protein SecB OS=Pseudomonas aeruginosa (strain ATCC 15692 / PAO1 / 1C / PRS 101 / LMG 12228) GN=secB PE=3 SV=1	1	1	1	1	5.5	5.5	5.5	18.146	163	163	0.0062893	5.813	0	1				53	142	TRUE	158	280	530	530
sp|Q9HU65|GLNA_PSEAE	sp|Q9HU65|GLNA_PSEAE	5	5	5	>sp|Q9HU65|GLNA_PSEAE Glutamine synthetase OS=Pseudomonas aeruginosa (strain ATCC 15692 / PAO1 / 1C / PRS 101 / LMG 12228) GN=glnA PE=1 SV=1	1	5	5	5	19	19	19	51.944	469	469	0	44.28	8856400	14				54	57;206;334;463;506	True;True;True;True;True	60;229;368;499;500;554	106;381;609;827;828;829;944;945	242;651;652;653;654;1083;1452;1453;1454;1455;1700;1701;1702;1703	242;652;1083;1455;1701	30;31	332;377
sp|Q9HU83|HUTU_PSEAE	sp|Q9HU83|HUTU_PSEAE	5	5	5	>sp|Q9HU83|HUTU_PSEAE Urocanate hydratase OS=Pseudomonas aeruginosa (strain ATCC 15692 / PAO1 / 1C / PRS 101 / LMG 12228) GN=hutU PE=1 SV=1	1	5	5	5	11.3	11.3	11.3	61.193	559	559	0	35.738	5274700	7				55	45;170;336;669;707	True;True;True;True;True	48;190;370;725;726;766	86;87;327;612;1239;1240;1241;1315	216;217;583;1086;2284;2285;2286;2424	216;583;1086;2284;2424	32	531
sp|Q9HUC8|SYR_PSEAE	sp|Q9HUC8|SYR_PSEAE	1	1	1	>sp|Q9HUC8|SYR_PSEAE Arginine--tRNA ligase OS=Pseudomonas aeruginosa (strain ATCC 15692 / PAO1 / 1C / PRS 101 / LMG 12228) GN=argS PE=3 SV=1	1	1	1	1	2	2	2	65.199	587	587	0	10.212	1366600	1				56	597	TRUE	650	1112	2065	2065
sp|Q9HUM6|PURA_PSEAE	sp|Q9HUM6|PURA_PSEAE	2	2	2	>sp|Q9HUM6|PURA_PSEAE Adenylosuccinate synthetase OS=Pseudomonas aeruginosa (strain ATCC 15692 / PAO1 / 1C / PRS 101 / LMG 12228) GN=purA PE=3 SV=1	1	2	2	2	7	7	7	46.814	430	430	0	17.502	2646700	3				57	596;648	True;True	649;704	1111;1202;1203	2064;2236;2237	2064;2236
sp|Q9HUM9|RS6_PSEAE	sp|Q9HUM9|RS6_PSEAE	1	1	1	>sp|Q9HUM9|RS6_PSEAE 30S ribosomal protein S6 OS=Pseudomonas aeruginosa (strain ATCC 15692 / PAO1 / 1C / PRS 101 / LMG 12228) GN=rpsF PE=3 SV=1	1	1	1	1	7.2	7.2	7.2	16.164	139	139	0	6.0652	391600	1				58	47	TRUE	50	90	220	220
sp|Q9HV43|DNAK_PSEAE	sp|Q9HV43|DNAK_PSEAE	5	5	5	>sp|Q9HV43|DNAK_PSEAE Chaperone protein DnaK OS=Pseudomonas aeruginosa (strain ATCC 15692 / PAO1 / 1C / PRS 101 / LMG 12228) GN=dnaK PE=3 SV=1	1	5	5	5	11.8	11.8	11.8	68.402	637	637	0	35.297	9962400	6				59	86;191;307;518;611	True;True;True;True;True	95;213;338;566;664	167;358;541;965;1138;1139	328;624;892;1741;2110;2111	328;624;892;1741;2111
sp|Q9HV59|PNP_PSEAE	sp|Q9HV59|PNP_PSEAE	4	4	4	>sp|Q9HV59|PNP_PSEAE Polyribonucleotide nucleotidyltransferase OS=Pseudomonas aeruginosa (strain ATCC 15692 / PAO1 / 1C / PRS 101 / LMG 12228) GN=pnp PE=3 SV=1	1	4	4	4	7.3	7.3	7.3	75.452	701	701	0	24.589	8639000	4				60	70;132;325;670	True;True;True;True	77;148;358;727	137;138;261;575;1242;1243	289;290;490;943;2287;2288	290;490;943;2288
sp|Q9HVA2|ILVC_PSEAE	sp|Q9HVA2|ILVC_PSEAE	1	1	1	>sp|Q9HVA2|ILVC_PSEAE Ketol-acid reductoisomerase OS=Pseudomonas aeruginosa (strain ATCC 15692 / PAO1 / 1C / PRS 101 / LMG 12228) GN=ilvC PE=1 SV=1	1	1	1	1	5.6	5.6	5.6	36.424	338	338	0	12.98	5124700	5				61	232	TRUE	255	413;414	693;694;695;696;697	695
sp|Q9HVC4|RL25_PSEAE	sp|Q9HVC4|RL25_PSEAE	1	1	1	>sp|Q9HVC4|RL25_PSEAE 50S ribosomal protein L25 OS=Pseudomonas aeruginosa (strain ATCC 15692 / PAO1 / 1C / PRS 101 / LMG 12228) GN=rplY PE=3 SV=1	1	1	1	1	6.4	6.4	6.4	21.962	204	204	0.0057803	5.6443	668040	1				62	635	TRUE	689	1176	2198	2198
sp|Q9HW02|MURC_PSEAE	sp|Q9HW02|MURC_PSEAE	1	1	1	>sp|Q9HW02|MURC_PSEAE UDP-N-acetylmuramate--L-alanine ligase OS=Pseudomonas aeruginosa (strain ATCC 15692 / PAO1 / 1C / PRS 101 / LMG 12228) GN=murC PE=3 SV=1	1	1	1	1	2.9	2.9	2.9	51.981	480	480	0.005848	5.6907	85036	1				63	430	TRUE	466	778	1364	1364
sp|Q9HWC9|RPOC_PSEAE	sp|Q9HWC9|RPOC_PSEAE	13	13	13	>sp|Q9HWC9|RPOC_PSEAE DNA-directed RNA polymerase subunit beta OS=Pseudomonas aeruginosa (strain ATCC 15692 / PAO1 / 1C / PRS 101 / LMG 12228) GN=rpoC PE=3 SV=1	1	13	13	13	11.7	11.7	11.7	154.38	1399	1399	0	93.143	32230000	21				64	117;155;168;185;186;295;305;406;422;460;577;618;731	True;True;True;True;True;True;True;True;True;True;True;True;True	130;172;188;207;208;325;326;336;441;457;496;630;671;790	230;231;232;300;301;324;325;352;353;521;522;538;539;732;733;762;763;824;1065;1066;1148;1363;1364	425;426;427;428;552;553;578;579;580;581;618;619;868;869;889;890;1288;1289;1335;1336;1449;1939;1940;2121;2528;2529	428;553;579;618;619;869;889;1288;1336;1449;1939;2121;2528	33	29
sp|Q9HWD2|EFG1_PSEAE;sp|Q9I244|EFG2_PSEAE	sp|Q9HWD2|EFG1_PSEAE	14;5	14;5	14;5	>sp|Q9HWD2|EFG1_PSEAE Elongation factor G 1 OS=Pseudomonas aeruginosa (strain ATCC 15692 / PAO1 / 1C / PRS 101 / LMG 12228) GN=fusA PE=1 SV=1	2	14	14	14	29.6	29.6	29.6	77.784	706	706;702	0	127.5	72678000	41				65	22;27;88;152;243;258;259;279;378;405;469;492;706;714	True;True;True;True;True;True;True;True;True;True;True;True;True;True	22;27;28;97;168;266;267;284;285;306;413;440;507;508;538;765;773	39;40;49;50;51;52;169;170;294;434;435;461;462;463;464;492;493;683;684;730;731;841;842;843;844;920;921;1313;1314;1323;1324	84;85;86;100;101;102;103;330;331;544;729;730;778;779;780;781;782;783;784;820;821;822;1191;1192;1193;1194;1283;1284;1285;1286;1287;1472;1473;1474;1475;1666;1667;1668;2420;2421;2422;2423;2433;2434;2435	86;103;331;544;729;779;782;820;1192;1286;1473;1668;2422;2435	34;35;36	388;409;648
sp|Q9HWD5|RL3_PSEAE	sp|Q9HWD5|RL3_PSEAE	1	1	1	>sp|Q9HWD5|RL3_PSEAE 50S ribosomal protein L3 OS=Pseudomonas aeruginosa (strain ATCC 15692 / PAO1 / 1C / PRS 101 / LMG 12228) GN=rplC PE=3 SV=1	1	1	1	1	4.7	4.7	4.7	22.591	211	211	0	5.9253	1285200	1				66	691	TRUE	750	1291	2391	2391
sp|Q9HWD8|RL2_PSEAE	sp|Q9HWD8|RL2_PSEAE	2	2	2	>sp|Q9HWD8|RL2_PSEAE 50S ribosomal protein L2 OS=Pseudomonas aeruginosa (strain ATCC 15692 / PAO1 / 1C / PRS 101 / LMG 12228) GN=rplB PE=3 SV=1	1	2	2	2	11.4	11.4	11.4	29.579	273	273	0	18.852	7526600	5				67	91;254	True;True	100;280	174;175;176;456;457	343;344;345;771;772	345;772
sp|Q9HWE5|RL14_PSEAE	sp|Q9HWE5|RL14_PSEAE	2	2	2	>sp|Q9HWE5|RL14_PSEAE 50S ribosomal protein L14 OS=Pseudomonas aeruginosa (strain ATCC 15692 / PAO1 / 1C / PRS 101 / LMG 12228) GN=rplN PE=3 SV=1	1	2	2	2	17.2	17.2	17.2	13.412	122	122	0	12.942	1647100	2				68	188;715	True;True	210;774	355;1325	621;2436	621;2436
sp|Q9HWF1|RL18_PSEAE	sp|Q9HWF1|RL18_PSEAE	1	1	1	>sp|Q9HWF1|RL18_PSEAE 50S ribosomal protein L18 OS=Pseudomonas aeruginosa (strain ATCC 15692 / PAO1 / 1C / PRS 101 / LMG 12228) GN=rplR PE=3 SV=1	1	1	1	1	9.5	9.5	9.5	12.661	116	116	0	7.3512	0	1				69	1	TRUE	1	1	1	1
sp|Q9HWF7|RS13_PSEAE	sp|Q9HWF7|RS13_PSEAE	2	2	2	>sp|Q9HWF7|RS13_PSEAE 30S ribosomal protein S13 OS=Pseudomonas aeruginosa (strain ATCC 15692 / PAO1 / 1C / PRS 101 / LMG 12228) GN=rpsM PE=3 SV=1	1	2	2	2	19.5	19.5	19.5	13.265	118	118	0	11.642	791060	2				70	275;312	True;True	302;344	488;553	816;911	816;911
sp|Q9HWG0|UVRA_PSEAE	sp|Q9HWG0|UVRA_PSEAE	1	1	1	>sp|Q9HWG0|UVRA_PSEAE UvrABC system protein A OS=Pseudomonas aeruginosa (strain ATCC 15692 / PAO1 / 1C / PRS 101 / LMG 12228) GN=uvrA PE=3 SV=1	1	1	1	1	1.6	1.6	1.6	104.49	945	945	0	5.9066	75539	1				71	409	TRUE	444	736	1292	1292
sp|Q9HXJ5|SYH_PSEAE	sp|Q9HXJ5|SYH_PSEAE	1	1	1	>sp|Q9HXJ5|SYH_PSEAE Histidine--tRNA ligase OS=Pseudomonas aeruginosa (strain ATCC 15692 / PAO1 / 1C / PRS 101 / LMG 12228) GN=hisS PE=3 SV=1	1	1	1	1	2.8	2.8	2.8	47.512	429	429	0	6.0807	377640	0				72	442	TRUE	478	795	1390	1390
sp|Q9HXM6|GUAA_PSEAE	sp|Q9HXM6|GUAA_PSEAE	4	4	4	>sp|Q9HXM6|GUAA_PSEAE GMP synthase [glutamine-hydrolyzing] OS=Pseudomonas aeruginosa (strain ATCC 15692 / PAO1 / 1C / PRS 101 / LMG 12228) GN=guaA PE=3 SV=1	1	4	4	4	10.9	10.9	10.9	57.959	525	525	0	23.732	3126600	4				73	75;195;306;667	True;True;True;True	83;218;337;723	146;147;365;540;1236	299;300;631;891;2279	300;631;891;2279
sp|Q9HXN2|PUR4_PSEAE	sp|Q9HXN2|PUR4_PSEAE	1	1	1	>sp|Q9HXN2|PUR4_PSEAE Phosphoribosylformylglycinamidine synthase OS=Pseudomonas aeruginosa (strain ATCC 15692 / PAO1 / 1C / PRS 101 / LMG 12228) GN=purL PE=3 SV=1	1	1	1	1	1.1	1.1	1.1	140.65	1298	1298	0	6.0483	323410	4				74	688	TRUE	747	1286;1287	2383;2384;2385;2386	2384
sp|Q9HXZ4|PYRG_PSEAE	sp|Q9HXZ4|PYRG_PSEAE	1	1	1	>sp|Q9HXZ4|PYRG_PSEAE CTP synthase OS=Pseudomonas aeruginosa (strain ATCC 15692 / PAO1 / 1C / PRS 101 / LMG 12228) GN=pyrG PE=3 SV=1	1	1	1	1	2.6	2.6	2.6	59.617	542	542	0	6.2119	998790	0				75	236	TRUE	259	420	705	705
sp|Q9HZ71|RS1_PSEAE	sp|Q9HZ71|RS1_PSEAE	6	6	6	>sp|Q9HZ71|RS1_PSEAE 30S ribosomal protein S1 OS=Pseudomonas aeruginosa (strain ATCC 15692 / PAO1 / 1C / PRS 101 / LMG 12228) GN=rpsA PE=3 SV=1	1	6	6	6	15.4	15.4	15.4	61.869	559	559	0	44.173	19341000	10				76	26;144;216;231;521;524	True;True;True;True;True;True	26;160;239;254;569;572	47;48;282;283;392;393;412;968;973	98;99;532;533;668;669;691;692;1744;1749	98;533;668;691;1744;1749
sp|Q9HZ76|WBPE_PSEAE	sp|Q9HZ76|WBPE_PSEAE	3	3	3	>sp|Q9HZ76|WBPE_PSEAE UDP-2-acetamido-2-deoxy-3-oxo-D-glucuronate aminotransferase OS=Pseudomonas aeruginosa (strain ATCC 15692 / PAO1 / 1C / PRS 101 / LMG 12228) GN=wbpE PE=1 SV=1	1	3	3	3	15.3	15.3	15.3	38.924	359	359	0	20.237	5045100	3				77	41;386;723	True;True;True	44;421;782	80;696;1350	209;1207;2507	209;1207;2507
sp|Q9HZA7|ACCD_PSEAE	sp|Q9HZA7|ACCD_PSEAE	1	1	1	>sp|Q9HZA7|ACCD_PSEAE Acetyl-coenzyme A carboxylase carboxyl transferase subunit beta OS=Pseudomonas aeruginosa (strain ATCC 15692 / PAO1 / 1C / PRS 101 / LMG 12228) GN=accD PE=1 SV=1	1	1	1	1	5.9	5.9	5.9	31.843	290	290	0	7.9623	2802000	2				78	376	TRUE	411	679;680	1186;1187	1187
sp|Q9HZE0|DHE2_PSEAE	sp|Q9HZE0|DHE2_PSEAE	15	15	15	>sp|Q9HZE0|DHE2_PSEAE NAD-specific glutamate dehydrogenase OS=Pseudomonas aeruginosa (strain ATCC 15692 / PAO1 / 1C / PRS 101 / LMG 12228) GN=gdhB PE=1 SV=1	1	15	15	15	12.6	12.6	12.6	182.64	1620	1620	0	121.81	44370000	38				79	13;42;76;106;164;377;401;432;461;465;644;649;663;689;721	True;True;True;True;True;True;True;True;True;True;True;True;True;True;True	13;45;84;118;182;412;436;468;497;502;700;705;719;748;780	22;81;82;148;149;208;209;210;314;315;681;682;721;722;781;782;825;832;833;1194;1195;1204;1205;1206;1230;1288;1348	49;210;211;301;302;390;391;392;393;394;395;396;397;398;566;567;1188;1189;1190;1266;1267;1268;1368;1369;1450;1459;1460;1461;1462;1463;2225;2226;2238;2239;2240;2241;2272;2387;2505	49;210;301;390;567;1190;1268;1369;1450;1459;2225;2241;2272;2387;2505	37	195
sp|Q9HZJ2|FADB_PSEAE	sp|Q9HZJ2|FADB_PSEAE	4	4	4	>sp|Q9HZJ2|FADB_PSEAE Fatty acid oxidation complex subunit alpha OS=Pseudomonas aeruginosa (strain ATCC 15692 / PAO1 / 1C / PRS 101 / LMG 12228) GN=fadB PE=3 SV=1	1	4	4	4	9.1	9.1	9.1	76.953	715	715	0	31.051	6224000	9				80	592;607;640;662	True;True;True;True	645;660;695;718	1105;1129;1130;1131;1186;1229	2057;2093;2094;2095;2096;2097;2098;2208;2271	2057;2094;2208;2271
sp|Q9I047|TAL_PSEAE	sp|Q9I047|TAL_PSEAE	1	1	1	>sp|Q9I047|TAL_PSEAE Transaldolase OS=Pseudomonas aeruginosa (strain ATCC 15692 / PAO1 / 1C / PRS 101 / LMG 12228) GN=tal PE=3 SV=1	1	1	1	1	4.9	4.9	4.9	33.946	307	307	0	7.897	311760	2				81	137	TRUE	153	269	513;514	514
sp|Q9I0J6|NUOG_PSEAE	sp|Q9I0J6|NUOG_PSEAE	3	3	3	>sp|Q9I0J6|NUOG_PSEAE NADH-quinone oxidoreductase subunit G OS=Pseudomonas aeruginosa (strain ATCC 15692 / PAO1 / 1C / PRS 101 / LMG 12228) GN=nuoG PE=3 SV=1	1	3	3	3	4.4	4.4	4.4	98.999	905	905	0	19.504	1997500	5				82	85;445;700	True;True;True	94;481;759	166;799;800;1304	327;1397;1398;2410;2411	327;1398;2410
sp|Q9I0J9|NUOCD_PSEAE	sp|Q9I0J9|NUOCD_PSEAE	3	3	3	>sp|Q9I0J9|NUOCD_PSEAE NADH-quinone oxidoreductase subunit C/D OS=Pseudomonas aeruginosa (strain ATCC 15692 / PAO1 / 1C / PRS 101 / LMG 12228) GN=nuoC PE=3 SV=1	1	3	3	3	5.9	5.9	5.9	68.322	593	593	0	20.873	3327300	2				83	89;143;415	True;True;True	98;159;450	171;281;752	332;531;1323	332;531;1323
sp|Q9I0K4|ACEA_PSEAE	sp|Q9I0K4|ACEA_PSEAE	9	9	9	>sp|Q9I0K4|ACEA_PSEAE Isocitrate lyase OS=Pseudomonas aeruginosa (strain ATCC 15692 / PAO1 / 1C / PRS 101 / LMG 12228) GN=PA2634 PE=1 SV=1	1	9	9	9	21.5	21.5	21.5	58.886	531	531	0	94.808	27658000	34				84	165;381;429;464;490;526;585;586;690	True;True;True;True;True;True;True;True;True	183;416;465;501;536;574;638;639;749	316;317;689;690;777;830;831;918;976;1083;1084;1085;1086;1087;1088;1089;1289;1290	568;569;570;571;1200;1201;1363;1456;1457;1458;1664;1753;1992;1993;1994;1995;1996;1997;1998;1999;2000;2001;2002;2003;2004;2005;2006;2007;2008;2009;2010;2388;2389;2390	570;1201;1363;1457;1664;1753;1993;2010;2388
sp|Q9I0Q0|PQSH_PSEAE	sp|Q9I0Q0|PQSH_PSEAE	1	1	1	>sp|Q9I0Q0|PQSH_PSEAE 2-heptyl-3-hydroxy-4(1H)-quinolone synthase OS=Pseudomonas aeruginosa (strain ATCC 15692 / PAO1 / 1C / PRS 101 / LMG 12228) GN=pqsH PE=3 SV=1	1	1	1	1	7.6	7.6	7.6	42.081	382	382	0.0059524	5.7398	797990	1				85	83	TRUE	92	163	324	324
sp|Q9I1L9|DLDH1_PSEAE	sp|Q9I1L9|DLDH1_PSEAE	4	4	4	>sp|Q9I1L9|DLDH1_PSEAE Dihydrolipoyl dehydrogenase OS=Pseudomonas aeruginosa (strain ATCC 15692 / PAO1 / 1C / PRS 101 / LMG 12228) GN=lpdV PE=1 SV=1	1	4	4	4	14.7	14.7	14.7	48.588	464	464	0	25.267	6319700	4				86	158;387;537;653	True;True;True;True	175;422;585;709	304;697;993;1212;1213	556;1208;1784;2249;2250	556;1208;1784;2249
sp|Q9I1M0|ODB2_PSEAE	sp|Q9I1M0|ODB2_PSEAE	2	2	2	>sp|Q9I1M0|ODB2_PSEAE Lipoamide acyltransferase component of branched-chain alpha-keto acid dehydrogenase complex OS=Pseudomonas aeruginosa (strain ATCC 15692 / PAO1 / 1C / PRS 101 / LMG 12228) GN=bkdB PE=1 SV=1	1	2	2	2	9.3	9.3	9.3	45.774	428	428	0	17.522	1415600	3				87	391;718	True;True	426;777	703;1330	1215;1216;2444	1216;2444
sp|Q9I1M1|ODBB_PSEAE	sp|Q9I1M1|ODBB_PSEAE	1	1	1	>sp|Q9I1M1|ODBB_PSEAE 2-oxoisovalerate dehydrogenase subunit beta OS=Pseudomonas aeruginosa (strain ATCC 15692 / PAO1 / 1C / PRS 101 / LMG 12228) GN=bkdA2 PE=3 SV=1	1	1	1	1	4.3	4.3	4.3	38.324	350	350	0.0057471	5.6387	621600	1				88	562	TRUE	613	1035	1834	1834
sp|Q9I1M2|ODBA_PSEAE	sp|Q9I1M2|ODBA_PSEAE	1	1	1	>sp|Q9I1M2|ODBA_PSEAE 2-oxoisovalerate dehydrogenase subunit alpha OS=Pseudomonas aeruginosa (strain ATCC 15692 / PAO1 / 1C / PRS 101 / LMG 12228) GN=bkdA1 PE=3 SV=1	1	1	1	1	3.2	3.2	3.2	45.256	410	410	0	7.9218	980180	1				89	497	TRUE	543	927	1675	1675
sp|Q9I1Z9|Y2116_PSEAE	sp|Q9I1Z9|Y2116_PSEAE	1	1	1	>sp|Q9I1Z9|Y2116_PSEAE UPF0317 protein PA2116 OS=Pseudomonas aeruginosa (strain ATCC 15692 / PAO1 / 1C / PRS 101 / LMG 12228) GN=PA2116 PE=3 SV=1	1	1	1	1	6.4	6.4	6.4	29.221	265	265	0.0060976	5.7784	1090600	1				90	512	TRUE	560	953	1720	1720
sp|Q9I2A8|ATOB_PSEAE	sp|Q9I2A8|ATOB_PSEAE	5	5	5	>sp|Q9I2A8|ATOB_PSEAE Acetyl-CoA acetyltransferase OS=Pseudomonas aeruginosa (strain ATCC 15692 / PAO1 / 1C / PRS 101 / LMG 12228) GN=atoB PE=3 SV=1	1	5	5	5	18.1	18.1	18.1	40.405	393	393	0	32.45	5295300	4				91	32;53;226;584;671	True;True;True;True;True	33;56;249;637;728	59;60;100;405;1082;1244	123;124;234;682;1991;2289	123;234;682;1991;2289	38	82
sp|Q9I2V5|ACNB_PSEAE	sp|Q9I2V5|ACNB_PSEAE	16	16	16	>sp|Q9I2V5|ACNB_PSEAE Aconitate hydratase B OS=Pseudomonas aeruginosa (strain ATCC 15692 / PAO1 / 1C / PRS 101 / LMG 12228) GN=acnB PE=3 SV=1	1	16	16	16	24.9	24.9	24.9	93.627	869	869	0	128.58	38234000	39				92	19;30;111;121;229;234;333;396;440;452;474;480;578;605;682;711	True;True;True;True;True;True;True;True;True;True;True;True;True;True;True;True	19;31;123;135;252;257;367;431;476;488;514;522;523;631;658;740;770	34;35;56;57;218;219;243;410;417;608;711;712;713;793;810;853;864;865;866;867;868;869;1067;1125;1126;1274;1275;1320	77;78;79;120;121;408;409;410;459;460;689;700;1082;1228;1229;1230;1231;1232;1233;1386;1387;1388;1423;1493;1508;1509;1510;1511;1512;1513;1514;1515;1516;1941;1942;2087;2088;2359;2360;2430	78;121;408;459;689;700;1082;1228;1387;1423;1493;1514;1941;2088;2359;2430	39;40	411;423
sp|Q9I3D1|DLDH2_PSEAE	sp|Q9I3D1|DLDH2_PSEAE	10	10	10	>sp|Q9I3D1|DLDH2_PSEAE Dihydrolipoyl dehydrogenase OS=Pseudomonas aeruginosa (strain ATCC 15692 / PAO1 / 1C / PRS 101 / LMG 12228) GN=lpdG PE=3 SV=1	1	10	10	10	30.8	30.8	30.8	50.164	478	478	0	88.286	37958000	25				93	17;55;62;78;82;261;410;498;532;609	True;True;True;True;True;True;True;True;True;True	17;58;65;66;86;90;91;287;445;544;580;662	30;31;103;113;114;115;153;154;159;160;161;162;466;467;737;928;929;985;1134;1135	71;72;73;239;252;253;254;255;312;313;314;315;320;321;322;323;786;787;1293;1676;1677;1678;1770;2103;2104	72;239;254;314;322;786;1293;1677;1770;2103	41;42	336;394
sp|Q9I3F5|ACNA_PSEAE	sp|Q9I3F5|ACNA_PSEAE	16	16	16	>sp|Q9I3F5|ACNA_PSEAE Aconitate hydratase A OS=Pseudomonas aeruginosa (strain ATCC 15692 / PAO1 / 1C / PRS 101 / LMG 12228) GN=acnA PE=3 SV=1	1	16	16	16	28.9	28.9	28.9	99.147	910	910	0	131.44	59026000	49				94	31;44;154;211;283;327;328;375;425;602;616;622;660;666;668;736	True;True;True;True;True;True;True;True;True;True;True;True;True;True;True;True	32;47;171;234;312;360;361;362;409;410;460;655;669;675;716;722;724;795	58;84;85;297;298;299;386;501;578;579;580;581;677;678;767;768;1117;1118;1119;1120;1146;1154;1155;1227;1234;1235;1237;1238;1371;1372	122;214;215;548;549;550;551;660;661;832;949;950;951;952;953;1184;1185;1340;1341;1342;1343;2071;2072;2073;2074;2075;2076;2077;2078;2079;2080;2119;2128;2129;2130;2131;2132;2133;2134;2269;2276;2277;2278;2280;2281;2282;2283;2537;2538;2539	122;214;550;661;832;949;951;1184;1342;2071;2119;2132;2269;2278;2281;2537	43;44;45	88;132;774
sp|Q9I426|CYOB_PSEAE	sp|Q9I426|CYOB_PSEAE	1	1	1	>sp|Q9I426|CYOB_PSEAE Cytochrome bo(3) ubiquinol oxidase subunit 1 OS=Pseudomonas aeruginosa (strain ATCC 15692 / PAO1 / 1C / PRS 101 / LMG 12228) GN=cyoB PE=3 SV=1	1	1	1	1	2.7	2.7	2.7	73.934	658	658	0.0054645	5.514	492350	1				95	34	TRUE	36	66	137	137
sp|Q9I558|ACSA1_PSEAE	sp|Q9I558|ACSA1_PSEAE	6	6	6	>sp|Q9I558|ACSA1_PSEAE Acetyl-coenzyme A synthetase 1 OS=Pseudomonas aeruginosa (strain ATCC 15692 / PAO1 / 1C / PRS 101 / LMG 12228) GN=acsA1 PE=3 SV=1	1	6	6	6	18.1	18.1	18.1	71.762	651	651	0	48.734	10310000	11				96	67;159;222;536;619;699	True;True;True;True;True;True	74;176;245;584;672;758	131;132;305;401;992;1149;1150;1303	280;281;282;283;557;678;1782;1783;2122;2123;2409	280;557;678;1783;2122;2409	46	550
sp|Q9I576|HPPD_PSEAE	sp|Q9I576|HPPD_PSEAE	8	8	8	>sp|Q9I576|HPPD_PSEAE 4-hydroxyphenylpyruvate dioxygenase OS=Pseudomonas aeruginosa (strain ATCC 15692 / PAO1 / 1C / PRS 101 / LMG 12228) GN=hpd PE=3 SV=1	1	8	8	8	29.4	29.4	29.4	39.912	357	357	0	76.625	13030000	13				97	50;51;205;331;450;457;487;621	True;True;True;True;True;True;True;True	53;54;228;365;486;493;533;674	95;96;97;379;380;606;808;819;912;913;1153	229;230;231;649;650;1079;1420;1444;1653;1654;1655;1656;1657;1658;2127	229;230;649;1079;1420;1444;1654;2127	47	269
sp|Q9I589|CBPD_PSEAE	sp|Q9I589|CBPD_PSEAE	2	2	2	>sp|Q9I589|CBPD_PSEAE Chitin-binding protein CbpD OS=Pseudomonas aeruginosa (strain ATCC 15692 / PAO1 / 1C / PRS 101 / LMG 12228) GN=cbpD PE=1 SV=1	1	2	2	2	5.9	5.9	5.9	41.916	389	389	0	15.008	3232600	3				98	79;272	True;True	87;299	155;156;484	316;317;812	317;812
sp|Q9I5A5|PTA_PSEAE	sp|Q9I5A5|PTA_PSEAE	1	1	1	>sp|Q9I5A5|PTA_PSEAE Phosphate acetyltransferase OS=Pseudomonas aeruginosa (strain ATCC 15692 / PAO1 / 1C / PRS 101 / LMG 12228) GN=pta PE=1 SV=1	1	1	1	1	1.4	1.4	1.4	75.696	704	704	0.0063291	5.8267	70317	2				99	652	TRUE	708	1211	2247;2248	2247
sp|Q9I5Y1|ALF_PSEAE	sp|Q9I5Y1|ALF_PSEAE	2	2	2	>sp|Q9I5Y1|ALF_PSEAE Fructose-bisphosphate aldolase OS=Pseudomonas aeruginosa (strain ATCC 15692 / PAO1 / 1C / PRS 101 / LMG 12228) GN=fba PE=3 SV=1	1	2	2	2	7.3	7.3	7.3	38.573	354	354	0	12.069	2144400	2				100	196;209	True;True	219;232	366;384	632;658	632;658
sp|Q9I5Z0|METK_PSEAE	sp|Q9I5Z0|METK_PSEAE	4	4	4	>sp|Q9I5Z0|METK_PSEAE S-adenosylmethionine synthase OS=Pseudomonas aeruginosa (strain ATCC 15692 / PAO1 / 1C / PRS 101 / LMG 12228) GN=metK PE=3 SV=1	1	4	4	4	15.2	15.2	15.2	42.709	396	396	0	27.51	4092300	4				101	273;311;495;698	True;True;True;True	300;343;541;757	485;552;925;1302	813;910;1673;2408	813;910;1673;2408	48	256
sp|Q9I617|BIOF_PSEAE	sp|Q9I617|BIOF_PSEAE	1	1	1	>sp|Q9I617|BIOF_PSEAE 8-amino-7-oxononanoate synthase OS=Pseudomonas aeruginosa (strain ATCC 15692 / PAO1 / 1C / PRS 101 / LMG 12228) GN=bioF PE=3 SV=1	1	1	1	1	5	5	5	42.237	401	401	0	6.2145	4598700	0				102	81	TRUE	89	158	319	319
sp|Q9I636|MASZ_PSEAE	sp|Q9I636|MASZ_PSEAE	2	2	2	>sp|Q9I636|MASZ_PSEAE Malate synthase G OS=Pseudomonas aeruginosa (strain ATCC 15692 / PAO1 / 1C / PRS 101 / LMG 12228) GN=glcB PE=3 SV=1	1	2	2	2	2.8	2.8	2.8	78.659	725	725	0	13.175	2657400	3				103	338;632	True;True	372;686	614;1171	1088;1089;2193	1088;2193
sp|Q9I685|SAHH_PSEAE	sp|Q9I685|SAHH_PSEAE	10	10	10	>sp|Q9I685|SAHH_PSEAE Adenosylhomocysteinase OS=Pseudomonas aeruginosa (strain ATCC 15692 / PAO1 / 1C / PRS 101 / LMG 12228) GN=ahcY PE=3 SV=1	1	10	10	10	27.3	27.3	27.3	51.399	469	469	0	69.359	35004000	24				104	227;302;324;358;462;516;540;617;677;713	True;True;True;True;True;True;True;True;True;True	250;333;356;357;392;498;564;589;670;735;772	406;407;533;534;571;572;573;574;644;645;826;962;963;997;1147;1264;1265;1322	683;684;685;884;885;935;936;937;938;939;940;941;942;1130;1131;1451;1738;1739;1788;2120;2333;2334;2335;2336;2432	683;884;937;1130;1451;1738;1788;2120;2336;2432	49;50	5;387
sp|Q9I6M4|DAVT_PSEAE	sp|Q9I6M4|DAVT_PSEAE	8	8	8	>sp|Q9I6M4|DAVT_PSEAE 5-aminovalerate aminotransferase DavT OS=Pseudomonas aeruginosa (strain ATCC 15692 / PAO1 / 1C / PRS 101 / LMG 12228) GN=davT PE=1 SV=1	1	8	8	8	24.4	24.4	24.4	45.22	426	426	0	58.891	16622000	11				105	21;256;363;576;593;601;650;701	True;True;True;True;True;True;True;True	21;282;397;629;646;654;706;760	37;38;459;659;1063;1064;1106;1116;1207;1208;1305	81;82;83;774;775;1155;1937;1938;2058;2070;2242;2243;2412	81;775;1155;1938;2058;2070;2243;2412	51	163
sp|Q9I6M5|DAVD_PSEAE	sp|Q9I6M5|DAVD_PSEAE	3	3	3	>sp|Q9I6M5|DAVD_PSEAE Glutarate-semialdehyde dehydrogenase DavD OS=Pseudomonas aeruginosa (strain ATCC 15692 / PAO1 / 1C / PRS 101 / LMG 12228) GN=davD PE=1 SV=1	1	3	3	3	12.4	12.4	12.4	51.622	483	483	0	35.004	11305000	5				106	435;673;702	True;True;True	471;730;761	786;1249;1250;1306	1375;2306;2307;2308;2413	1375;2306;2413
sp|Q9I6T2|POTA1_PSEAE	sp|Q9I6T2|POTA1_PSEAE	1	1	1	>sp|Q9I6T2|POTA1_PSEAE Spermidine/putrescine import ATP-binding protein PotA 1 OS=Pseudomonas aeruginosa (strain ATCC 15692 / PAO1 / 1C / PRS 101 / LMG 12228) GN=potA1 PE=3 SV=1	1	1	1	1	2.7	2.7	2.7	40.362	370	370	0	6.0348	3299800	3				107	443	TRUE	479	796	1391;1392;1393	1391
sp|Q9I747|HCP1_PSEAE	sp|Q9I747|HCP1_PSEAE	2	2	2	>sp|Q9I747|HCP1_PSEAE Protein hcp1 OS=Pseudomonas aeruginosa (strain ATCC 15692 / PAO1 / 1C / PRS 101 / LMG 12228) GN=hcp1 PE=1 SV=1	1	2	2	2	16.7	16.7	16.7	17.414	162	162	0	19.17	5164500	3				108	179;676	True;True	200;734	339;1262;1263	595;2331;2332	595;2331
sp|Q9I7C4|DPO3B_PSEAE	sp|Q9I7C4|DPO3B_PSEAE	1	1	1	>sp|Q9I7C4|DPO3B_PSEAE DNA polymerase III subunit beta OS=Pseudomonas aeruginosa (strain ATCC 15692 / PAO1 / 1C / PRS 101 / LMG 12228) GN=dnaN PE=3 SV=1	1	1	1	1	4.4	4.4	4.4	40.694	367	367	0.0056818	5.6264	1735900	1				109	145	TRUE	161	284	534	534
sp|Q9S508|PHZB2_PSEAE;sp|O69753|PHZB1_PSEAE	sp|Q9S508|PHZB2_PSEAE;sp|O69753|PHZB1_PSEAE	4;3	4;3	4;3	>sp|Q9S508|PHZB2_PSEAE Phenazine biosynthesis protein PhzB 2 OS=Pseudomonas aeruginosa (strain ATCC 15692 / PAO1 / 1C / PRS 101 / LMG 12228) GN=phzB2 PE=1 SV=1;>sp|O69753|PHZB1_PSEAE Phenazine biosynthesis protein PhzB 1 OS=Pseudomonas aeruginosa (strain A	2	4	4	4	34	34	34	19.027	162	162;162	0	26.156	14806000	11				110	60;153;316;366	True;True;True;True	63;169;170;348;400	110;111;295;296;559;560;663	247;248;249;250;545;546;547;917;918;919;1168	247;547;917;1168	52	139
sp|Q9X2T1|THIO_PSEAE	sp|Q9X2T1|THIO_PSEAE	1	1	1	>sp|Q9X2T1|THIO_PSEAE Thioredoxin OS=Pseudomonas aeruginosa (strain ATCC 15692 / PAO1 / 1C / PRS 101 / LMG 12228) GN=trxA PE=3 SV=1	1	1	1	1	11.1	11.1	11.1	11.87	108	108	0	6.2343	1342000	3				111	434	TRUE	470	784;785	1372;1373;1374	1373
sp|Q9X4G0|HGD_PSEAE	sp|Q9X4G0|HGD_PSEAE	1	1	1	>sp|Q9X4G0|HGD_PSEAE Homogentisate 1,2-dioxygenase OS=Pseudomonas aeruginosa (strain ATCC 15692 / PAO1 / 1C / PRS 101 / LMG 12228) GN=hmgA PE=3 SV=2	1	1	1	1	2.1	2.1	2.1	47.841	432	432	0.0054945	5.5397	1620300	0				112	636	TRUE	690	1177;1178	2199;2200	2199
tr|G3XCU6|G3XCU6_PSEAE	tr|G3XCU6|G3XCU6_PSEAE	1	1	1	>tr|G3XCU6|G3XCU6_PSEAE Transcriptional regulator CysB OS=Pseudomonas aeruginosa (strain ATCC 15692 / PAO1 / 1C / PRS 101 / LMG 12228) GN=cysB PE=4 SV=1	1	1	1	1	3.7	3.7	3.7	36.109	324	324	0	5.9578	623650	1				113	697	TRUE	756	1301	2407	2407
tr|G3XCZ6|G3XCZ6_PSEAE	tr|G3XCZ6|G3XCZ6_PSEAE	1	1	1	>tr|G3XCZ6|G3XCZ6_PSEAE Malonyl CoA-acyl carrier protein transacylase OS=Pseudomonas aeruginosa (strain ATCC 15692 / PAO1 / 1C / PRS 101 / LMG 12228) GN=fabD PE=3 SV=1	1	1	1	1	6.4	6.4	6.4	32.444	312	312	0.005814	5.6557	1353400	1				114	337	TRUE	371	613	1087	1087
tr|Q7DC80|Q7DC80_PSEAE	tr|Q7DC80|Q7DC80_PSEAE	1	1	1	>tr|Q7DC80|Q7DC80_PSEAE Phenazine biosynthesis protein PhzD OS=Pseudomonas aeruginosa (strain ATCC 15692 / PAO1 / 1C / PRS 101 / LMG 12228) GN=phzD1 PE=1 SV=1	1	1	1	1	5.3	5.3	5.3	23.195	207	207	0.0056497	5.6081	935600	1				115	722	TRUE	781	1349	2506	2506
tr|Q9HTD1|Q9HTD1_PSEAE	tr|Q9HTD1|Q9HTD1_PSEAE	25	25	25	>tr|Q9HTD1|Q9HTD1_PSEAE Probable transcarboxylase subunit OS=Pseudomonas aeruginosa (strain ATCC 15692 / PAO1 / 1C / PRS 101 / LMG 12228) GN=PA5435 PE=4 SV=1	1	25	25	25	49.4	49.4	49.4	66.095	607	607	0	224.16	322490000	153				116	10;14;63;73;74;124;141;199;221;252;253;282;290;362;472;515;542;543;594;674;683;684;724;725;728	True;True;True;True;True;True;True;True;True;True;True;True;True;True;True;True;True;True;True;True;True;True;True;True;True	10;14;67;68;81;82;138;139;157;222;244;277;278;279;309;310;311;319;320;396;511;512;563;591;592;593;594;647;731;741;742;743;783;784;787	17;18;23;24;25;26;116;117;118;119;120;121;142;143;144;145;247;248;249;276;277;278;279;371;372;399;400;450;451;452;453;454;455;498;499;500;512;513;514;515;657;658;848;849;850;851;958;959;960;961;999;1000;1001;1002;1003;1004;1005;1006;1007;1107;1108;1251;1252;1276;1277;1278;1279;1280;1281;1351;1352;1353;1354;1358;1359	43;44;45;50;51;52;53;54;55;56;57;58;59;60;61;62;63;64;65;66;256;257;258;259;260;261;262;294;295;296;297;298;468;469;470;471;472;473;474;521;522;523;524;525;526;527;528;529;640;641;675;676;677;749;750;751;752;753;754;755;756;757;758;759;760;761;762;763;764;765;766;767;768;769;770;829;830;831;853;854;855;856;857;858;1152;1153;1154;1479;1480;1481;1482;1483;1484;1485;1486;1487;1488;1489;1490;1491;173…	43;51;256;295;297;470;526;640;675;750;766;831;853;1154;1485;1733;1792;1800;2060;2311;2362;2376;2508;2513;2520	53;54;55;56;57;58;59;60;61;62	125;169;172;182;239;251;274;306;323;435
tr|Q9HTD9|Q9HTD9_PSEAE	tr|Q9HTD9|Q9HTD9_PSEAE	4	4	4	>tr|Q9HTD9|Q9HTD9_PSEAE Alcohol dehydrogenase OS=Pseudomonas aeruginosa (strain ATCC 15692 / PAO1 / 1C / PRS 101 / LMG 12228) GN=adhA PE=1 SV=1	1	4	4	4	18.7	18.7	18.7	35.911	342	342	0	24.002	3723700	5				117	11;286;519;531	True;True;True;True	11;315;567;579	19;20;507;966;984	46;47;848;1742;1769	47;848;1742;1769
tr|Q9HTP2|Q9HTP2_PSEAE	tr|Q9HTP2|Q9HTP2_PSEAE	9	9	9	>tr|Q9HTP2|Q9HTP2_PSEAE Probable aldehyde dehydrogenase OS=Pseudomonas aeruginosa (strain ATCC 15692 / PAO1 / 1C / PRS 101 / LMG 12228) GN=PA5312 PE=3 SV=1	1	9	9	9	26	26	26	53.143	497	497	0	60.059	17745000	11				118	115;150;201;255;277;278;352;408;567	True;True;True;True;True;True;True;True;True	128;166;224;281;304;305;386;443;619	228;291;374;375;458;490;491;634;635;735;1043	423;541;643;644;645;773;818;819;1116;1117;1291;1878	423;541;644;773;818;819;1116;1291;1878
tr|Q9HUD3|Q9HUD3_PSEAE	tr|Q9HUD3|Q9HUD3_PSEAE	4	4	4	>tr|Q9HUD3|Q9HUD3_PSEAE Malic enzyme OS=Pseudomonas aeruginosa (strain ATCC 15692 / PAO1 / 1C / PRS 101 / LMG 12228) GN=PA5046 PE=4 SV=1	1	4	4	4	13.7	13.7	13.7	45.428	422	422	0	37.017	5312000	5				119	4;120;418;541	True;True;True;True	4;134;453;590	6;7;242;755;998	7;8;458;1326;1789	7;458;1326;1789
tr|Q9HUT6|Q9HUT6_PSEAE	tr|Q9HUT6|Q9HUT6_PSEAE	1	1	1	>tr|Q9HUT6|Q9HUT6_PSEAE Uncharacterized protein OS=Pseudomonas aeruginosa (strain ATCC 15692 / PAO1 / 1C / PRS 101 / LMG 12228) GN=PA4877 PE=4 SV=1	1	1	1	1	7.4	7.4	7.4	14.86	135	135	0.0054348	5.5129	20392000	5				120	354	TRUE	388	638;639	1120;1121;1122;1123;1124	1122
tr|Q9HV54|Q9HV54_PSEAE	tr|Q9HV54|Q9HV54_PSEAE	2	2	2	>tr|Q9HV54|Q9HV54_PSEAE Transcription termination/antitermination protein NusA OS=Pseudomonas aeruginosa (strain ATCC 15692 / PAO1 / 1C / PRS 101 / LMG 12228) GN=nusA PE=3 SV=1	1	2	2	2	7.7	7.7	7.7	54.658	493	493	0	19.386	917060	4				121	257;289	True;True	283;318	460;510;511	776;777;851;852	777;852
tr|Q9HV96|Q9HV96_PSEAE	tr|Q9HV96|Q9HV96_PSEAE	1	1	1	>tr|Q9HV96|Q9HV96_PSEAE Uncharacterized protein OS=Pseudomonas aeruginosa (strain ATCC 15692 / PAO1 / 1C / PRS 101 / LMG 12228) GN=PA4701 PE=4 SV=1	1	1	1	1	2.5	2.5	2.5	58.376	520	520	0	6.0079	649370	0				122	293	TRUE	323	518	864	864
tr|Q9HVJ1|Q9HVJ1_PSEAE	tr|Q9HVJ1|Q9HVJ1_PSEAE	3	3	3	>tr|Q9HVJ1|Q9HVJ1_PSEAE Probable ATP-binding component of ABC transporter OS=Pseudomonas aeruginosa (strain ATCC 15692 / PAO1 / 1C / PRS 101 / LMG 12228) GN=PA4595 PE=4 SV=1	1	3	3	3	5.8	5.8	5.8	61.32	554	554	0	18.156	2244600	3				123	297;300;665	True;True;True	328;331;721	525;530;1233	872;881;2275	872;881;2275
tr|Q9HVY5|Q9HVY5_PSEAE	tr|Q9HVY5|Q9HVY5_PSEAE	2	2	2	>tr|Q9HVY5|Q9HVY5_PSEAE Cytochrome b OS=Pseudomonas aeruginosa (strain ATCC 15692 / PAO1 / 1C / PRS 101 / LMG 12228) GN=PA4430 PE=3 SV=1	1	2	2	2	6.7	6.7	6.7	46.072	403	403	0	14.403	2059700	5				124	204;603	True;True	227;656	378;1121;1122	648;2081;2082;2083;2084	648;2081	63	5
tr|Q9HVY6|Q9HVY6_PSEAE	tr|Q9HVY6|Q9HVY6_PSEAE	3	3	3	>tr|Q9HVY6|Q9HVY6_PSEAE Probable cytochrome c1 OS=Pseudomonas aeruginosa (strain ATCC 15692 / PAO1 / 1C / PRS 101 / LMG 12228) GN=PA4429 PE=4 SV=1	1	3	3	3	15	15	15	28.993	260	260	0	19.839	4009300	3				125	250;499;615	True;True;True	275;545;668	448;930;1145	747;1679;2118	747;1679;2118
tr|Q9HW32|Q9HW32_PSEAE	tr|Q9HW32|Q9HW32_PSEAE	1	1	1	>tr|Q9HW32|Q9HW32_PSEAE Insulin-cleaving metalloproteinase outer membrane protein OS=Pseudomonas aeruginosa (strain ATCC 15692 / PAO1 / 1C / PRS 101 / LMG 12228) GN=icmP PE=4 SV=1	1	1	1	1	5.2	5.2	5.2	47.23	446	446	0	8.3492	685230	3				126	16	TRUE	16	28;29	68;69;70	70
tr|Q9HW49|Q9HW49_PSEAE	tr|Q9HW49|Q9HW49_PSEAE	5	5	5	>tr|Q9HW49|Q9HW49_PSEAE Uncharacterized protein OS=Pseudomonas aeruginosa (strain ATCC 15692 / PAO1 / 1C / PRS 101 / LMG 12228) GN=PA4352 PE=3 SV=1	1	5	5	5	32.9	32.9	32.9	30.972	286	286	0	39.426	15339000	28				127	101;371;633;641;642	True;True;True;True;True	112;113;405;687;696;697;698	198;199;200;201;670;671;1172;1173;1187;1188;1189;1190;1191	367;368;369;370;371;372;373;374;375;376;1176;1177;2194;2195;2209;2210;2211;2212;2213;2214;2215;2216;2217;2218;2219;2220;2221;2222	372;1176;2194;2219;2222	64;65	100;158
tr|Q9HW72|Q9HW72_PSEAE	tr|Q9HW72|Q9HW72_PSEAE	1	1	1	>tr|Q9HW72|Q9HW72_PSEAE Pyruvate kinase OS=Pseudomonas aeruginosa (strain ATCC 15692 / PAO1 / 1C / PRS 101 / LMG 12228) GN=pykA PE=3 SV=1	1	1	1	1	5.6	5.6	5.6	52.252	483	483	0.005988	5.7519	1202900	3				128	345	TRUE	379	624;625	1104;1105;1106	1106
tr|Q9HWG9|Q9HWG9_PSEAE	tr|Q9HWG9|Q9HWG9_PSEAE	2	2	2	>tr|Q9HWG9|Q9HWG9_PSEAE Flavin-containing monooxygenase OS=Pseudomonas aeruginosa (strain ATCC 15692 / PAO1 / 1C / PRS 101 / LMG 12228) GN=phzS PE=1 SV=1	1	2	2	2	9.7	9.7	9.7	43.644	402	402	0	16.476	1717100	3				129	110;729	True;True	122;788	217;1360	406;407;2522	406;2522
tr|Q9HWI2|Q9HWI2_PSEAE	tr|Q9HWI2|Q9HWI2_PSEAE	1	1	1	>tr|Q9HWI2|Q9HWI2_PSEAE Probable acyl-CoA dehydrogenase OS=Pseudomonas aeruginosa (strain ATCC 15692 / PAO1 / 1C / PRS 101 / LMG 12228) GN=PA4199 PE=3 SV=1	1	1	1	1	3.5	3.5	3.5	63.926	593	593	0.00625	5.8058	553200	3				130	291	TRUE	321	516	859;860;861	860
tr|Q9HWQ0|Q9HWQ0_PSEAE	tr|Q9HWQ0|Q9HWQ0_PSEAE	1	1	1	>tr|Q9HWQ0|Q9HWQ0_PSEAE Probable iron-sulfur protein OS=Pseudomonas aeruginosa (strain ATCC 15692 / PAO1 / 1C / PRS 101 / LMG 12228) GN=PA4131 PE=4 SV=1	1	1	1	1	2.4	2.4	2.4	63.991	573	573	0	8.6157	725660	1				131	172	TRUE	193	332	588	588
tr|Q9HWV0|Q9HWV0_PSEAE	tr|Q9HWV0|Q9HWV0_PSEAE	8	8	8	>tr|Q9HWV0|Q9HWV0_PSEAE Probable nonribosomal peptide synthetase OS=Pseudomonas aeruginosa (strain ATCC 15692 / PAO1 / 1C / PRS 101 / LMG 12228) GN=PA4078 PE=4 SV=1	1	8	8	8	12.5	12.5	12.5	110.35	991	991	0	66.607	18555000	13				132	28;102;156;225;438;550;634;734	True;True;True;True;True;True;True;True	29;114;173;248;474;601;688;793	53;202;302;404;791;1016;1017;1174;1175;1368;1369	104;377;554;681;1383;1384;1811;1812;1813;2196;2197;2534;2535	104;377;554;681;1383;1812;2197;2534
tr|Q9HX05|Q9HX05_PSEAE;tr|Q9I2C4|Q9I2C4_PSEAE	tr|Q9HX05|Q9HX05_PSEAE;tr|Q9I2C4|Q9I2C4_PSEAE	5;4	5;4	5;4	>tr|Q9HX05|Q9HX05_PSEAE Probable aldehyde dehydrogenase OS=Pseudomonas aeruginosa (strain ATCC 15692 / PAO1 / 1C / PRS 101 / LMG 12228) GN=PA4022 PE=3 SV=1;>tr|Q9I2C4|Q9I2C4_PSEAE NAD+ dependent aldehyde dehydrogenase ExaC OS=Pseudomonas aeruginosa (strain	2	5	5	5	15.4	15.4	15.4	54.979	506	506;506	0	39.403	15371000	8				133	61;274;388;716;727	True;True;True;True;True	64;301;423;775;786	112;486;487;698;699;1326;1327;1356;1357	251;814;815;1209;1210;1211;2437;2438;2518;2519	251;814;1209;2438;2518
tr|Q9HXM5|Q9HXM5_PSEAE	tr|Q9HXM5|Q9HXM5_PSEAE	1	1	1	>tr|Q9HXM5|Q9HXM5_PSEAE Inosine-5-monophosphate dehydrogenase OS=Pseudomonas aeruginosa (strain ATCC 15692 / PAO1 / 1C / PRS 101 / LMG 12228) GN=guaB PE=1 SV=1	1	1	1	1	3.1	3.1	3.1	51.707	489	489	0.0055249	5.5531	0	1				134	6	TRUE	6	10	11	11	66;67	444;455
tr|Q9HY12|Q9HY12_PSEAE	tr|Q9HY12|Q9HY12_PSEAE	1	1	1	>tr|Q9HY12|Q9HY12_PSEAE Uncharacterized protein OS=Pseudomonas aeruginosa (strain ATCC 15692 / PAO1 / 1C / PRS 101 / LMG 12228) GN=PA3614 PE=4 SV=1	1	1	1	1	6	6	6	51.921	467	467	0.006135	5.782	1709800	1				135	72	TRUE	80	141	293	293
tr|Q9HY13|Q9HY13_PSEAE	tr|Q9HY13|Q9HY13_PSEAE	4	4	4	>tr|Q9HY13|Q9HY13_PSEAE Uncharacterized protein OS=Pseudomonas aeruginosa (strain ATCC 15692 / PAO1 / 1C / PRS 101 / LMG 12228) GN=PA3613 PE=4 SV=1	1	4	4	4	7.1	7.1	7.1	88.378	801	801	0	25.93	4830600	4				136	384;583;645;661	True;True;True;True	419;636;701;717	693;1080;1081;1196;1228	1204;1989;1990;2227;2270	1204;1989;2227;2270
tr|Q9HY79|Q9HY79_PSEAE	tr|Q9HY79|Q9HY79_PSEAE	2	2	2	>tr|Q9HY79|Q9HY79_PSEAE Ferroxidase OS=Pseudomonas aeruginosa (strain ATCC 15692 / PAO1 / 1C / PRS 101 / LMG 12228) GN=bfrB PE=1 SV=1	1	2	2	2	20.3	20.3	20.3	18.553	158	158	0	12.163	9596300	3				137	315;318	True;True	347;350	557;558;562;563	915;916;921;922	916;921
tr|Q9HY81|Q9HY81_PSEAE	tr|Q9HY81|Q9HY81_PSEAE	8	8	8	>tr|Q9HY81|Q9HY81_PSEAE Probable peroxidase OS=Pseudomonas aeruginosa (strain ATCC 15692 / PAO1 / 1C / PRS 101 / LMG 12228) GN=PA3529 PE=1 SV=1	1	8	8	8	42.5	42.5	42.5	21.822	200	200	0	54.424	49184000	24				138	104;214;246;501;509;568;732;738	True;True;True;True;True;True;True;True	116;237;270;547;557;620;791;797	205;206;390;439;933;934;949;1044;1045;1365;1366;1374	380;381;382;383;384;385;386;387;666;734;1686;1687;1688;1711;1879;1880;1881;1882;1883;1884;1885;1886;2530;2531;2541	385;666;734;1688;1711;1884;2530;2541
tr|Q9HYF1|Q9HYF1_PSEAE	tr|Q9HYF1|Q9HYF1_PSEAE	1	1	1	>tr|Q9HYF1|Q9HYF1_PSEAE Uncharacterized protein OS=Pseudomonas aeruginosa (strain ATCC 15692 / PAO1 / 1C / PRS 101 / LMG 12228) GN=PA3455 PE=1 SV=1	1	1	1	1	2.6	2.6	2.6	58.331	496	496	0	6.208	476250	0				139	321	TRUE	353	566	925	925
tr|Q9HYT5|Q9HYT5_PSEAE	tr|Q9HYT5|Q9HYT5_PSEAE	5	5	5	>tr|Q9HYT5|Q9HYT5_PSEAE Uncharacterized protein OS=Pseudomonas aeruginosa (strain ATCC 15692 / PAO1 / 1C / PRS 101 / LMG 12228) GN=PA3309 PE=3 SV=1	1	5	5	5	39.7	39.7	39.7	16.496	151	151	0	38.879	35669000	22				140	268;323;428;626;654	True;True;True;True;True	294;355;463;464;680;710	477;478;569;570;773;774;775;776;1162;1214;1215;1216;1217	805;806;930;931;932;933;934;1354;1355;1356;1357;1358;1359;1360;1361;1362;2143;2251;2252;2253;2254;2255	805;930;1361;2143;2253	68	129
tr|Q9HZC5|Q9HZC5_PSEAE	tr|Q9HZC5|Q9HZC5_PSEAE	2	2	2	>tr|Q9HZC5|Q9HZC5_PSEAE Aminopeptidase N OS=Pseudomonas aeruginosa (strain ATCC 15692 / PAO1 / 1C / PRS 101 / LMG 12228) GN=pepN PE=4 SV=1	1	2	2	2	3.2	3.2	3.2	100.05	885	885	0	13.032	869410	2				141	210;313	True;True	233;345	385;554	659;912	659;912
tr|Q9HZK4|Q9HZK4_PSEAE	tr|Q9HZK4|Q9HZK4_PSEAE	5	5	5	>tr|Q9HZK4|Q9HZK4_PSEAE Glyceraldehyde-3-phosphate dehydrogenase OS=Pseudomonas aeruginosa (strain ATCC 15692 / PAO1 / 1C / PRS 101 / LMG 12228) GN=PA3001 PE=3 SV=1	1	5	5	5	13.2	13.2	13.2	50.111	461	461	0	49.548	8594600	6				142	151;395;538;554;679	True;True;True;True;True	167;430;586;587;605;737	292;293;710;994;995;1023;1269	542;543;1227;1785;1786;1820;2341	543;1227;1786;1820;2341	69	325
tr|Q9I028|Q9I028_PSEAE	tr|Q9I028|Q9I028_PSEAE	5	5	5	>tr|Q9I028|Q9I028_PSEAE Probable acyl-CoA dehydrogenase OS=Pseudomonas aeruginosa (strain ATCC 15692 / PAO1 / 1C / PRS 101 / LMG 12228) GN=PA2815 PE=4 SV=1	1	5	5	5	13.1	13.1	13.1	88.762	815	815	0	42.142	17385000	13				143	175;322;397;681;730	True;True;True;True;True	196;354;432;739;789	335;567;568;714;1272;1273;1361;1362	591;926;927;928;929;1234;2356;2357;2358;2523;2524;2525;2526;2527	591;927;1234;2358;2527
tr|Q9I0L4|Q9I0L4_PSEAE	tr|Q9I0L4|Q9I0L4_PSEAE	2	2	2	>tr|Q9I0L4|Q9I0L4_PSEAE Isocitrate dehydrogenase OS=Pseudomonas aeruginosa (strain ATCC 15692 / PAO1 / 1C / PRS 101 / LMG 12228) GN=idh PE=4 SV=1	1	2	2	2	3.8	3.8	3.8	81.633	741	741	0	16.336	2063300	3				144	138;319	True;True	154;351	270;271;564	515;516;923	515;923
tr|Q9I0L5|Q9I0L5_PSEAE	tr|Q9I0L5|Q9I0L5_PSEAE	12	12	12	>tr|Q9I0L5|Q9I0L5_PSEAE Isocitrate dehydrogenase [NADP] OS=Pseudomonas aeruginosa (strain ATCC 15692 / PAO1 / 1C / PRS 101 / LMG 12228) GN=icd PE=3 SV=1	1	12	12	12	36.8	36.8	36.8	45.577	418	418	0	101.24	59355000	43				145	59;92;136;174;208;247;269;343;361;504;675;709	True;True;True;True;True;True;True;True;True;True;True;True	62;101;152;195;231;271;295;296;377;395;551;552;732;733;768	108;109;177;178;267;268;334;383;440;441;479;480;621;622;655;656;940;941;1253;1254;1255;1256;1257;1258;1259;1260;1261;1317;1318	244;245;246;346;347;510;511;512;590;656;657;735;736;737;738;807;808;1099;1100;1101;1102;1150;1151;1695;1696;1697;2314;2315;2316;2317;2318;2319;2320;2321;2322;2323;2324;2325;2326;2327;2328;2329;2330;2426;2427;2428	244;346;511;590;656;735;807;1101;1150;1695;2325;2428	70;71;72;73;74	21;47;364;365;369
tr|Q9I0T1|Q9I0T1_PSEAE	tr|Q9I0T1|Q9I0T1_PSEAE	5	5	5	>tr|Q9I0T1|Q9I0T1_PSEAE Probable acyl-CoA thiolase OS=Pseudomonas aeruginosa (strain ATCC 15692 / PAO1 / 1C / PRS 101 / LMG 12228) GN=PA2553 PE=3 SV=1	1	5	5	5	15.7	15.7	15.7	41.4	396	396	0	38.866	5268100	6				146	135;148;350;455;517	True;True;True;True;True	151;164;384;491;565	265;266;288;632;815;816;964	508;509;538;1114;1429;1430;1740	509;538;1114;1430;1740
tr|Q9I0T2|Q9I0T2_PSEAE	tr|Q9I0T2|Q9I0T2_PSEAE	1	1	1	>tr|Q9I0T2|Q9I0T2_PSEAE Probable acyl-CoA dehydrogenase OS=Pseudomonas aeruginosa (strain ATCC 15692 / PAO1 / 1C / PRS 101 / LMG 12228) GN=PA2552 PE=3 SV=1	1	1	1	1	2.7	2.7	2.7	40.908	375	375	0	6.6085	436300	1				147	276	TRUE	303	489	817	817
tr|Q9I1E7|Q9I1E7_PSEAE	tr|Q9I1E7|Q9I1E7_PSEAE	3	3	3	>tr|Q9I1E7|Q9I1E7_PSEAE Alkyl hydroperoxide reductase AhpD OS=Pseudomonas aeruginosa (strain ATCC 15692 / PAO1 / 1C / PRS 101 / LMG 12228) GN=PA2331 PE=3 SV=1	1	3	3	3	17.7	17.7	17.7	19.904	186	186	0	20.168	4084800	2				148	217;439;604	True;True;True	240;475;657	394;792;1123;1124	670;1385;2085;2086	670;1385;2085
tr|Q9I1E8|Q9I1E8_PSEAE	tr|Q9I1E8|Q9I1E8_PSEAE	2	2	2	>tr|Q9I1E8|Q9I1E8_PSEAE Uncharacterized protein OS=Pseudomonas aeruginosa (strain ATCC 15692 / PAO1 / 1C / PRS 101 / LMG 12228) GN=PA2330 PE=4 SV=1	1	2	2	2	7	7	7	37.68	355	355	0	14.276	2192800	3				149	403;559	True;True	438;610	725;726;1031	1272;1273;1830	1273;1830
tr|Q9I1H3|Q9I1H3_PSEAE	tr|Q9I1H3|Q9I1H3_PSEAE	2	2	2	>tr|Q9I1H3|Q9I1H3_PSEAE AmbE OS=Pseudomonas aeruginosa (strain ATCC 15692 / PAO1 / 1C / PRS 101 / LMG 12228) GN=ambE PE=4 SV=1	1	2	2	2	1.2	1.2	1.2	229.04	2124	2124	0	11.967	1136200	2				150	0;630	True;True	0;684	0;1168	0;2183	0;2183
tr|Q9I1H5|Q9I1H5_PSEAE	tr|Q9I1H5|Q9I1H5_PSEAE	7	7	7	>tr|Q9I1H5|Q9I1H5_PSEAE Chitinase OS=Pseudomonas aeruginosa (strain ATCC 15692 / PAO1 / 1C / PRS 101 / LMG 12228) GN=chiC PE=3 SV=1	1	7	7	7	20.1	20.1	20.1	53.042	483	483	0	53.255	36654000	23				151	239;281;372;373;513;628;717	True;True;True;True;True;True;True	262;308;406;407;561;682;776	424;425;495;496;497;672;673;674;954;955;1165;1166;1328;1329	710;711;824;825;826;827;828;1178;1179;1180;1181;1721;1722;1723;2177;2178;2179;2180;2181;2439;2440;2441;2442;2443	711;826;1178;1181;1721;2177;2439
tr|Q9I246|Q9I246_PSEAE	tr|Q9I246|Q9I246_PSEAE	11	11	11	>tr|Q9I246|Q9I246_PSEAE Probable carbamoyl transferase OS=Pseudomonas aeruginosa (strain ATCC 15692 / PAO1 / 1C / PRS 101 / LMG 12228) GN=PA2069 PE=4 SV=1	1	11	11	11	25.4	25.4	25.4	63.382	574	574	0	83.425	31617000	27				152	109;173;176;219;270;280;340;511;535;549;556	True;True;True;True;True;True;True;True;True;True;True	121;194;197;242;297;307;374;559;583;600;607	215;216;333;336;397;481;482;494;617;618;951;952;989;990;991;1014;1015;1025;1026	403;404;405;589;592;673;809;810;823;1092;1093;1094;1095;1713;1714;1715;1716;1717;1718;1719;1777;1778;1779;1780;1781;1809;1810;1822;1823	404;589;592;673;810;823;1092;1713;1778;1810;1822	75	400
tr|Q9I296|Q9I296_PSEAE	tr|Q9I296|Q9I296_PSEAE	1	1	1	>tr|Q9I296|Q9I296_PSEAE Putative isovaleryl-CoA dehydrogenase OS=Pseudomonas aeruginosa (strain ATCC 15692 / PAO1 / 1C / PRS 101 / LMG 12228) GN=liuA PE=3 SV=1	1	1	1	1	2.6	2.6	2.6	42.209	387	387	0.0060241	5.7524	727300	1				153	230	TRUE	253	411	690	690
tr|Q9I299|Q9I299_PSEAE	tr|Q9I299|Q9I299_PSEAE	9	9	9	>tr|Q9I299|Q9I299_PSEAE Methylcrotonyl-CoA carboxylase, alpha-subunit (Biotin-containing) OS=Pseudomonas aeruginosa (strain ATCC 15692 / PAO1 / 1C / PRS 101 / LMG 12228) GN=liuD PE=1 SV=1	1	9	9	9	21.2	21.2	21.2	71.282	655	655	0	54.744	14275000	11				154	52;140;223;271;301;303;317;383;695	True;True;True;True;True;True;True;True;True	55;156;246;298;332;334;349;418;754	98;99;274;275;402;483;531;532;535;561;692;1298	232;233;519;520;679;811;882;883;886;920;1203;2399	233;520;679;811;883;886;920;1203;2399
tr|Q9I2A2|Q9I2A2_PSEAE	tr|Q9I2A2|Q9I2A2_PSEAE	1	1	1	>tr|Q9I2A2|Q9I2A2_PSEAE Fumarylacetoacetase OS=Pseudomonas aeruginosa (strain ATCC 15692 / PAO1 / 1C / PRS 101 / LMG 12228) GN=fahA PE=4 SV=1	1	1	1	1	4.9	4.9	4.9	46.341	432	432	0.005618	5.5921	898550	1				155	547	TRUE	598	1012	1807	1807
tr|Q9I2A6|Q9I2A6_PSEAE	tr|Q9I2A6|Q9I2A6_PSEAE	1	1	1	>tr|Q9I2A6|Q9I2A6_PSEAE 3-hydroxybutyrate dehydrogenase OS=Pseudomonas aeruginosa (strain ATCC 15692 / PAO1 / 1C / PRS 101 / LMG 12228) GN=bdhA PE=3 SV=1	1	1	1	1	6.2	6.2	6.2	26.727	256	256	0	5.9952	3650200	2				156	347	TRUE	381	627;628	1108;1109	1109
tr|Q9I2R2|Q9I2R2_PSEAE	tr|Q9I2R2|Q9I2R2_PSEAE	3	3	3	>tr|Q9I2R2|Q9I2R2_PSEAE Probable oxidoreductase OS=Pseudomonas aeruginosa (strain ATCC 15692 / PAO1 / 1C / PRS 101 / LMG 12228) GN=PA1833 PE=4 SV=1	1	3	3	3	10	10	10	34.551	330	330	0	18.472	2049000	3				157	87;131;412	True;True;True	96;147;447	168;260;741	329;489;1297	329;489;1297
tr|Q9I2V3|Q9I2V3_PSEAE	tr|Q9I2V3|Q9I2V3_PSEAE	1	1	1	>tr|Q9I2V3|Q9I2V3_PSEAE Uncharacterized protein OS=Pseudomonas aeruginosa (strain ATCC 15692 / PAO1 / 1C / PRS 101 / LMG 12228) GN=PA1789 PE=1 SV=1	1	1	1	1	6.3	6.3	6.3	31.273	287	287	0	5.9097	1249600	1				158	555	TRUE	606	1024	1821	1821
tr|Q9I2W9|Q9I2W9_PSEAE	tr|Q9I2W9|Q9I2W9_PSEAE	8	8	8	>tr|Q9I2W9|Q9I2W9_PSEAE Phosphoenolpyruvate synthase OS=Pseudomonas aeruginosa (strain ATCC 15692 / PAO1 / 1C / PRS 101 / LMG 12228) GN=ppsA PE=3 SV=1	1	8	8	8	11.5	11.5	11.5	85.816	791	791	0	59.828	16796000	12				159	24;56;177;184;564;598;599;637	True;True;True;True;True;True;True;True	24;59;198;206;615;651;652;691	43;44;104;105;337;350;351;1037;1113;1114;1179	92;93;240;241;593;616;617;1836;2066;2067;2068;2201	93;241;593;617;1836;2066;2067;2201
tr|Q9I3B2|Q9I3B2_PSEAE	tr|Q9I3B2|Q9I3B2_PSEAE	2	2	2	>tr|Q9I3B2|Q9I3B2_PSEAE Beta-ketoacyl-ACP synthase I OS=Pseudomonas aeruginosa (strain ATCC 15692 / PAO1 / 1C / PRS 101 / LMG 12228) GN=fabB PE=3 SV=1	1	2	2	2	6.7	6.7	6.7	42.806	405	405	0	15.883	3586800	4				160	128;178	True;True	144;199	255;256;338	483;484;485;594	483;594
tr|Q9I3D3|Q9I3D3_PSEAE	tr|Q9I3D3|Q9I3D3_PSEAE	7	7	7	>tr|Q9I3D3|Q9I3D3_PSEAE 2-oxoglutarate dehydrogenase (E1 subunit) OS=Pseudomonas aeruginosa (strain ATCC 15692 / PAO1 / 1C / PRS 101 / LMG 12228) GN=sucA PE=4 SV=1	1	7	7	7	10.9	10.9	10.9	105.88	943	943	0	49.439	16346000	16				161	108;245;436;437;448;468;473	True;True;True;True;True;True;True	120;269;472;473;484;505;506;513	213;214;437;438;787;788;789;790;805;838;839;840;852	401;402;732;733;1376;1377;1378;1379;1380;1381;1382;1411;1469;1470;1471;1492	401;733;1376;1379;1411;1470;1492	76	592
tr|Q9I3D4|Q9I3D4_PSEAE	tr|Q9I3D4|Q9I3D4_PSEAE	4	4	4	>tr|Q9I3D4|Q9I3D4_PSEAE Succinate dehydrogenase (B subunit) OS=Pseudomonas aeruginosa (strain ATCC 15692 / PAO1 / 1C / PRS 101 / LMG 12228) GN=sdhB PE=4 SV=1	1	4	4	4	22.6	22.6	22.6	26.155	235	235	0	29.872	21290000	10				162	198;380;459;658	True;True;True;True	221;415;495;714	369;370;687;688;822;823;1221;1222	637;638;639;1197;1198;1199;1447;1448;2260;2261	637;1197;1448;2261
tr|Q9I3D5|Q9I3D5_PSEAE	tr|Q9I3D5|Q9I3D5_PSEAE	9	9	9	>tr|Q9I3D5|Q9I3D5_PSEAE Succinate dehydrogenase flavoprotein subunit OS=Pseudomonas aeruginosa (strain ATCC 15692 / PAO1 / 1C / PRS 101 / LMG 12228) GN=sdhA PE=3 SV=1	1	9	9	9	20.5	20.5	20.5	63.531	590	590	0	90.782	39186000	33				163	215;224;235;284;285;351;385;404;491	True;True;True;True;True;True;True;True;True	238;247;258;313;314;385;420;439;537	391;403;418;419;502;503;504;505;506;633;694;695;727;728;729;919	667;680;701;702;703;704;833;834;835;836;837;838;839;840;841;842;843;844;845;846;847;1115;1205;1206;1274;1275;1276;1277;1278;1279;1280;1281;1282;1665	667;680;701;835;837;1115;1205;1276;1665
tr|Q9I3G0|Q9I3G0_PSEAE	tr|Q9I3G0|Q9I3G0_PSEAE	2	2	2	>tr|Q9I3G0|Q9I3G0_PSEAE Cytochrome c oxidase, cbb3-type, CcoN subunit OS=Pseudomonas aeruginosa (strain ATCC 15692 / PAO1 / 1C / PRS 101 / LMG 12228) GN=ccoN2 PE=3 SV=1	1	2	2	2	6.1	6.1	6.1	53.09	475	475	0	13.256	1537800	3				164	572;614	True;True	625;667	1055;1056;1144	1929;1930;2117	1929;2117
tr|Q9I3G2|Q9I3G2_PSEAE	tr|Q9I3G2|Q9I3G2_PSEAE	2	2	2	>tr|Q9I3G2|Q9I3G2_PSEAE Cbb3-type cytochrome c oxidase subunit OS=Pseudomonas aeruginosa (strain ATCC 15692 / PAO1 / 1C / PRS 101 / LMG 12228) GN=ccoP2 PE=3 SV=1	1	2	2	2	9.4	9.4	9.4	33.812	308	308	0	10.909	2651000	0				165	588;710	True;True	641;769	1092;1319	2013;2429	2013;2429
tr|Q9I3G3|Q9I3G3_PSEAE	tr|Q9I3G3|Q9I3G3_PSEAE	1	1	1	>tr|Q9I3G3|Q9I3G3_PSEAE Cytochrome c oxidase, cbb3-type, CcoN subunit OS=Pseudomonas aeruginosa (strain ATCC 15692 / PAO1 / 1C / PRS 101 / LMG 12228) GN=ccoN1 PE=3 SV=1	1	1	1	1	2.9	2.9	2.9	53.108	475	475	0.0059172	5.7168	2252000	0				166	5	TRUE	5	8;9	9;10	9
tr|Q9I3G6|Q9I3G6_PSEAE	tr|Q9I3G6|Q9I3G6_PSEAE	3	3	3	>tr|Q9I3G6|Q9I3G6_PSEAE Probable ferredoxin OS=Pseudomonas aeruginosa (strain ATCC 15692 / PAO1 / 1C / PRS 101 / LMG 12228) GN=PA1551 PE=4 SV=1	1	3	3	3	7	7	7	53.62	471	471	0	20.453	4480600	4				167	242;244;288	True;True;True	265;268;317	432;433;436;509	727;728;731;850	728;731;850
tr|Q9I4I1|Q9I4I1_PSEAE	tr|Q9I4I1|Q9I4I1_PSEAE	1	1	1	>tr|Q9I4I1|Q9I4I1_PSEAE Ribonucleoside-diphosphate reductase OS=Pseudomonas aeruginosa (strain ATCC 15692 / PAO1 / 1C / PRS 101 / LMG 12228) GN=nrdA PE=3 SV=1	1	1	1	1	1.7	1.7	1.7	107.11	963	963	0.0057143	5.6337	330600	2				168	483	TRUE	529	883;884	1555;1556	1556
tr|Q9I5E3|Q9I5E3_PSEAE	tr|Q9I5E3|Q9I5E3_PSEAE	2	2	2	>tr|Q9I5E3|Q9I5E3_PSEAE Citrate synthase OS=Pseudomonas aeruginosa (strain ATCC 15692 / PAO1 / 1C / PRS 101 / LMG 12228) GN=prpC PE=3 SV=1	1	2	2	2	7.5	7.5	7.5	41.689	375	375	0	16.132	2854800	3				169	309;421	True;True	340;456	544;545;761	896;897;1334	896;1334
tr|Q9I5F6|Q9I5F6_PSEAE	tr|Q9I5F6|Q9I5F6_PSEAE	1	1	1	>tr|Q9I5F6|Q9I5F6_PSEAE Bifunctional protein PutA OS=Pseudomonas aeruginosa (strain ATCC 15692 / PAO1 / 1C / PRS 101 / LMG 12228) GN=putA PE=3 SV=1	1	1	1	1	1.4	1.4	1.4	115.63	1060	1060	0	10.902	1507300	2				170	458	TRUE	494	820;821	1445;1446	1446
tr|Q9I5U9|Q9I5U9_PSEAE	tr|Q9I5U9|Q9I5U9_PSEAE	13	13	13	>tr|Q9I5U9|Q9I5U9_PSEAE Uncharacterized protein OS=Pseudomonas aeruginosa (strain ATCC 15692 / PAO1 / 1C / PRS 101 / LMG 12228) GN=PA0588 PE=4 SV=1	1	13	13	13	25.9	25.9	25.9	73.722	640	640	0	111.95	51309000	35				171	66;127;420;424;426;431;467;470;475;489;505;589;705	True;True;True;True;True;True;True;True;True;True;True;True;True	72;73;142;143;455;459;461;467;504;509;515;516;535;553;642;764	129;130;252;253;254;758;759;760;765;766;769;770;779;780;836;837;845;846;854;855;856;916;917;942;943;1093;1311;1312	278;279;477;478;479;480;481;482;1331;1332;1333;1338;1339;1344;1345;1346;1365;1366;1367;1466;1467;1468;1476;1477;1494;1495;1496;1661;1662;1663;1698;1699;2014;2418;2419	279;477;1332;1339;1345;1366;1466;1476;1495;1661;1699;2014;2418	77;78;79	260;359;412
tr|Q9I5Y8|Q9I5Y8_PSEAE	tr|Q9I5Y8|Q9I5Y8_PSEAE	2	2	2	>tr|Q9I5Y8|Q9I5Y8_PSEAE Transketolase OS=Pseudomonas aeruginosa (strain ATCC 15692 / PAO1 / 1C / PRS 101 / LMG 12228) GN=tktA PE=1 SV=1	1	2	2	2	4.1	4.1	4.1	72.219	665	665	0	12.166	2060600	1				172	182;189	True;True	203;211	345;356	605;622	605;622
tr|Q9I612|Q9I612_PSEAE	tr|Q9I612|Q9I612_PSEAE	2	2	2	>tr|Q9I612|Q9I612_PSEAE Probable acyl-CoA dehydrogenase OS=Pseudomonas aeruginosa (strain ATCC 15692 / PAO1 / 1C / PRS 101 / LMG 12228) GN=PA0506 PE=3 SV=1	1	2	2	2	4	4	4	65.358	601	601	0	11.333	635450	2				173	202;365	True;True	225;399	376;662	646;1167	646;1167
tr|Q9I625|Q9I625_PSEAE	tr|Q9I625|Q9I625_PSEAE	1	1	1	>tr|Q9I625|Q9I625_PSEAE Probable biotin-requiring enzyme OS=Pseudomonas aeruginosa (strain ATCC 15692 / PAO1 / 1C / PRS 101 / LMG 12228) GN=PA0493 PE=4 SV=1	1	1	1	1	18.3	18.3	18.3	8.5205	82	82	0.0055866	5.5902	3968400	3				174	18	TRUE	18	32;33	74;75;76	76
tr|Q9I659|Q9I659_PSEAE;sp|Q9HVN5|CLPB_PSEAE	tr|Q9I659|Q9I659_PSEAE	7;2	7;2	7;2	>tr|Q9I659|Q9I659_PSEAE Probable ClpA/B protease ATP binding subunit OS=Pseudomonas aeruginosa (strain ATCC 15692 / PAO1 / 1C / PRS 101 / LMG 12228) GN=PA0459 PE=4 SV=1	2	7	7	7	10.4	10.4	10.4	94.174	850	850;854	0	50.226	4763500	9				175	39;416;486;503;581;629;726	True;True;True;True;True;True;True	41;451;532;550;634;683;785	72;753;910;911;939;1076;1077;1167;1355	146;1324;1651;1652;1694;1983;1984;2182;2517	146;1324;1652;1694;1983;2182;2517
tr|Q9I671|Q9I671_PSEAE	tr|Q9I671|Q9I671_PSEAE	2	2	2	>tr|Q9I671|Q9I671_PSEAE Glutaryl-CoA dehydrogenase OS=Pseudomonas aeruginosa (strain ATCC 15692 / PAO1 / 1C / PRS 101 / LMG 12228) GN=gcdH PE=3 SV=1	1	2	2	2	7.4	7.4	7.4	43.311	393	393	0	11.56	2890100	2				176	125;262	True;True	140;288	250;468	475;788	475;788
tr|Q9I689|Q9I689_PSEAE	tr|Q9I689|Q9I689_PSEAE	1	1	1	>tr|Q9I689|Q9I689_PSEAE ATP-dependent RNA helicase RhlE OS=Pseudomonas aeruginosa (strain ATCC 15692 / PAO1 / 1C / PRS 101 / LMG 12228) GN=rhlE PE=3 SV=1	1	1	1	1	2.5	2.5	2.5	70.111	639	639	0	7.3853	108890	1				177	98	TRUE	109	194	363	363
tr|Q9I6A0|Q9I6A0_PSEAE	tr|Q9I6A0|Q9I6A0_PSEAE	2	2	2	>tr|Q9I6A0|Q9I6A0_PSEAE Probable cystathionine gamma-lyase OS=Pseudomonas aeruginosa (strain ATCC 15692 / PAO1 / 1C / PRS 101 / LMG 12228) GN=PA0400 PE=3 SV=1	1	2	2	2	10.9	10.9	10.9	42.786	394	394	0	17.595	1866700	3				178	402;447	True;True	437;483	723;724;803;804	1269;1270;1271;1409;1410	1269;1410
tr|Q9I6H5|Q9I6H5_PSEAE	tr|Q9I6H5|Q9I6H5_PSEAE	3	3	3	>tr|Q9I6H5|Q9I6H5_PSEAE D-3-phosphoglycerate dehydrogenase OS=Pseudomonas aeruginosa (strain ATCC 15692 / PAO1 / 1C / PRS 101 / LMG 12228) GN=serA PE=3 SV=1	1	3	3	3	10.3	10.3	10.3	44.216	409	409	0	21.793	4111800	4				179	3;200;573	True;True;True	3;223;626	4;5;373;1057	5;6;642;1931	6;642;1931
tr|Q9I6J2|Q9I6J2_PSEAE	tr|Q9I6J2|Q9I6J2_PSEAE	2	2	2	>tr|Q9I6J2|Q9I6J2_PSEAE Putrescine aminotransferase OS=Pseudomonas aeruginosa (strain ATCC 15692 / PAO1 / 1C / PRS 101 / LMG 12228) GN=spuC PE=3 SV=1	1	2	2	2	7.7	7.7	7.7	50.452	456	456	0	11.013	1954300	1				180	169;712	True;True	189;771	326;1321	582;2431	582;2431
tr|Q9I6J5|Q9I6J5_PSEAE	tr|Q9I6J5|Q9I6J5_PSEAE	1	1	1	>tr|Q9I6J5|Q9I6J5_PSEAE Probable glutamine synthetase OS=Pseudomonas aeruginosa (strain ATCC 15692 / PAO1 / 1C / PRS 101 / LMG 12228) GN=spuI PE=3 SV=1	1	1	1	1	5.7	5.7	5.7	50.907	458	458	0	6.4103	1954500	3				181	620	TRUE	673	1151;1152	2124;2125;2126	2124
tr|Q9I6Z3|Q9I6Z3_PSEAE	tr|Q9I6Z3|Q9I6Z3_PSEAE	7	7	7	>tr|Q9I6Z3|Q9I6Z3_PSEAE Alkyl hydroperoxide reductase subunit C OS=Pseudomonas aeruginosa (strain ATCC 15692 / PAO1 / 1C / PRS 101 / LMG 12228) GN=ahpC PE=4 SV=1	1	7	7	7	51.3	51.3	51.3	20.541	187	187	0	50.011	51563000	22				182	77;194;251;558;595;613;704	True;True;True;True;True;True;True	85;217;276;609;648;666;763	150;151;152;363;364;449;1029;1030;1109;1110;1142;1143;1309;1310	303;304;305;306;307;308;309;310;311;629;630;748;1826;1827;1828;1829;2061;2062;2063;2114;2115;2116;2416;2417	303;629;748;1829;2062;2116;2417
tr|Q9I762|Q9I762_PSEAE	tr|Q9I762|Q9I762_PSEAE	1	1	1	>tr|Q9I762|Q9I762_PSEAE Uncharacterized protein OS=Pseudomonas aeruginosa (strain ATCC 15692 / PAO1 / 1C / PRS 101 / LMG 12228) GN=PA0070 PE=4 SV=1	1	1	1	1	3.3	3.3	3.3	31.716	304	304	0.0058824	5.7009	151060	1				183	298	TRUE	329	526	873	873
tr|Q9I765|Q9I765_PSEAE	tr|Q9I765|Q9I765_PSEAE	1	1	1	>tr|Q9I765|Q9I765_PSEAE Oligopeptidase A OS=Pseudomonas aeruginosa (strain ATCC 15692 / PAO1 / 1C / PRS 101 / LMG 12228) GN=prlC PE=3 SV=1	1	1	1	1	1.3	1.3	1.3	76.043	681	681	0.0061728	5.7851	0	1				184	737	TRUE	796	1373	2540	2540

## Sheet: 7-1 proteinGroups Probe 12
Protein IDs	Majority protein IDs	Peptide counts (all)	Peptide counts (razor+unique)	Peptide counts (unique)	Fasta headers	Number of proteins	Peptides	Razor + unique peptides	Unique peptides	Sequence coverage [%]	Unique + razor sequence coverage [%]	Unique sequence coverage [%]	Mol. weight [kDa]	Sequence length	Sequence lengths	Q-value	Score	Intensity	MS/MS Count	Only identified by site	Reverse	Potential contaminant	id	Peptide IDs	Peptide is razor	Mod. peptide IDs	Evidence IDs	MS/MS IDs	Best MS/MS	Oxidation (M) site IDs	Oxidation (M) site positions
CON__ENSEMBL:ENSBTAP00000038253;CON__P35908;CON__Q9R0H5;CON__Q6NXH9;CON__P48668;CON__P04259;CON__P02538;CON__Q6IFZ6;CON__Q7Z794;CON__P19013	CON__ENSEMBL:ENSBTAP00000038253;CON__P35908	4;2;1;1;1;1;1;1;1;1	2;1;0;0;1;1;1;0;0;1	2;1;0;0;1;1;1;0;0;1	>ENSEMBL:ENSBTAP00000038253 (Bos taurus) 63 kDa protein;>P35908 SWISS-PROT:P35908 Tax_Id=9606 Gene_Symbol=KRT2 Keratin, type II cytoskeletal 2 epidermal	10	4	2	2	7.3	3.3	3.3	63.165	606	606;645;524;539;564;564;564;572;578;594	0	10.963	531320	2			+	0	60;142;384;409	True;False;False;True	65;160;421;449	114;259;260;721;772	278;523;524;525;526;527;528;1474;1666	278;523;1474;1666
CON__P00761	CON__P00761	4	4	4	>P00761 SWISS-PROT:P00761|TRYP_PIG Trypsin - Sus scrofa (Pig).	1	4	4	4	25.1	25.1	25.1	24.409	231	231	0	61.58	1103400000	84			+	1	215;265;297;436	True;True;True;True	238;239;290;323;477	380;381;382;383;384;481;482;483;484;537;538;811;812	745;746;747;748;749;750;751;752;753;754;755;756;757;758;955;956;957;958;959;960;961;962;963;964;965;966;967;968;969;970;971;972;973;974;975;976;977;978;979;980;981;982;983;1091;1092;1093;1094;1095;1096;1097;1098;1099;1722;1723;1724;1725;1726;1727;1728;1729;1730;1731;1732;1733;1734;1735;1736;1737;1738;1739;1740;1741;1742;1743;1744;1745;1746;1747;1748;1749;1750;1751;1752;1753	756;982;1097;1741	0	94
CON__P02535-1;CON__P13645	CON__P02535-1;CON__P13645	1;1	1;1	1;1	>P02535-1 SWISS-PROT:P02535-1 Tax_Id=10090 Gene_Symbol=Krt10 Isoform 1 of Keratin, type I cytoskeletal 10;>P13645 SWISS-PROT:P13645 Tax_Id=9606 Gene_Symbol=KRT10 Keratin, type I cytoskeletal 10	2	1	1	1	1.6	1.6	1.6	57.769	570	570;593	0	6.8126	2259300	2			+	2	259	TRUE	284	472;473	940;941	940
CON__P04264;CON__Q8BGZ7;CON__P50446;CON__Q922U2;CON__Q5XQN5	CON__P04264	4;1;1;1;1	4;1;1;1;1	2;1;1;1;1	>P04264 SWISS-PROT:P04264 Tax_Id=9606 Gene_Symbol=KRT1 Keratin, type II cytoskeletal 1	5	4	4	2	7.1	7.1	3.4	66.017	644	644;551;553;580;601	0	51.662	18404000	10			+	3	142;381;384;498	True;True;True;True	160;418;421;544	259;260;716;717;721;935	523;524;525;526;527;528;1468;1469;1474;2011	523;1469;1474;2011
CON__Q28107	CON__Q28107	1	1	1	>Q28107 SWISS-PROT:Q28107 (Bos taurus) Coagulation factor V precursor	1	1	1	1	0.6	0.6	0.6	248.98	2211	2211	0	5.5839	2183100	1			+	4	396	TRUE	435	745	1572	1572
CON__Streptavidin	CON__Streptavidin	5	5	5	>Streptavidin (S.avidinii)	1	5	5	5	43.1	43.1	43.1	16.622	160	160	0	102.78	2040700000	273			+	5	229;230;320;389;496	True;True;True;True;True	254;255;353;427;542	403;404;405;406;407;408;409;410;411;412;413;414;415;416;417;418;419;420;421;422;423;424;425;587;588;589;590;591;592;593;594;595;596;597;598;599;600;601;602;603;604;605;606;607;608;609;610;611;612;613;614;615;616;730;731;732;919;920;921;922;923;924;925;926;927;928;929;930;931;932;933	788;789;790;791;792;793;794;795;796;797;798;799;800;801;802;803;804;805;806;807;808;809;810;811;812;813;814;815;816;817;818;819;820;821;822;823;824;825;826;827;828;829;830;831;832;833;834;835;836;837;838;839;840;841;842;843;844;845;846;847;848;849;850;851;852;853;854;855;856;857;858;859;860;861;862;863;864;865;866;867;868;869;870;871;872;1203;1204;1205;1206;1207;1208;1209;1210;1211;1212;1213;1214…	813;872;1274;1527;1983
REV__sp|P14165|CISY_PSEAE	REV__sp|P14165|CISY_PSEAE	1	1	1	>sp|P14165|CISY_PSEAE Citrate synthase OS=Pseudomonas aeruginosa (strain ATCC 15692 / PAO1 / 1C / PRS 101 / LMG 12228) GN=gltA PE=3 SV=2	1	1	1	1	0	0	0	47.694	428	428	0.0063694	5.553	55194000	1		+		6	369	TRUE	404	696	1436	1436
sp|G3XD23|WBPB_PSEAE	sp|G3XD23|WBPB_PSEAE	1	1	1	>sp|G3XD23|WBPB_PSEAE UDP-N-acetyl-2-amino-2-deoxy-D-glucuronate oxidase OS=Pseudomonas aeruginosa (strain ATCC 15692 / PAO1 / 1C / PRS 101 / LMG 12228) GN=wbpB PE=1 SV=1	1	1	1	1	6.6	6.6	6.6	35.717	316	316	0.0063291	5.5444	2781100	2				7	368	TRUE	403	695	1434;1435	1435
sp|O30508|ARUC_PSEAE	sp|O30508|ARUC_PSEAE	1	1	1	>sp|O30508|ARUC_PSEAE Succinylornithine transaminase/acetylornithine aminotransferase OS=Pseudomonas aeruginosa (strain ATCC 15692 / PAO1 / 1C / PRS 101 / LMG 12228) GN=aruC PE=1 SV=2	1	1	1	1	3.9	3.9	3.9	43.747	406	406	0	17.221	986710	1				8	444	TRUE	485	823	1773	1773
sp|O52759|RS4_PSEAE	sp|O52759|RS4_PSEAE	2	2	2	>sp|O52759|RS4_PSEAE 30S ribosomal protein S4 OS=Pseudomonas aeruginosa (strain ATCC 15692 / PAO1 / 1C / PRS 101 / LMG 12228) GN=rpsD PE=3 SV=2	1	2	2	2	12.6	12.6	12.6	23.277	206	206	0	35.303	19688000	7				9	30;295	True;True	32;321	53;54;533;534	148;149;150;1084;1085;1086;1087	148;1084
sp|O52761|RL17_PSEAE	sp|O52761|RL17_PSEAE	1	1	1	>sp|O52761|RL17_PSEAE 50S ribosomal protein L17 OS=Pseudomonas aeruginosa (strain ATCC 15692 / PAO1 / 1C / PRS 101 / LMG 12228) GN=rplQ PE=3 SV=1	1	1	1	1	7.8	7.8	7.8	14.504	129	129	0	5.9285	2054100	1				10	430	TRUE	470	803	1707	1707
sp|O52762|CATA_PSEAE	sp|O52762|CATA_PSEAE	7	7	7	>sp|O52762|CATA_PSEAE Catalase OS=Pseudomonas aeruginosa (strain ATCC 15692 / PAO1 / 1C / PRS 101 / LMG 12228) GN=katA PE=1 SV=1	1	7	7	7	22	22	22	55.588	482	482	0	85.424	42935000	22				11	95;153;181;183;260;270;301	True;True;True;True;True;True;True	106;171;199;200;202;285;295;327	179;180;275;321;322;323;326;327;474;475;492;543;544	389;390;391;546;619;620;621;622;630;631;632;633;942;943;944;945;946;1002;1107;1108;1109;1110	389;546;622;631;945;1002;1107	1	30
sp|O54439|ACP1_PSEAE	sp|O54439|ACP1_PSEAE	1	1	1	>sp|O54439|ACP1_PSEAE Acyl carrier protein 1 OS=Pseudomonas aeruginosa (strain ATCC 15692 / PAO1 / 1C / PRS 101 / LMG 12228) GN=acpP1 PE=3 SV=4	1	1	1	1	20.5	20.5	20.5	8.7406	78	78	0	13.537	1643600	3				12	235	TRUE	260	432;433	882;883;884	883
sp|O68822|AMPA_PSEAE	sp|O68822|AMPA_PSEAE	10	10	10	>sp|O68822|AMPA_PSEAE Cytosol aminopeptidase OS=Pseudomonas aeruginosa (strain ATCC 15692 / PAO1 / 1C / PRS 101 / LMG 12228) GN=pepA PE=3 SV=1	1	10	10	10	28.7	28.7	28.7	52.331	495	495	0	99.543	86256000	34				13	71;108;123;155;175;253;275;282;400;449	True;True;True;True;True;True;True;True;True;True	79;120;137;173;193;278;300;307;439;493	135;136;204;205;226;277;310;311;464;465;501;502;512;513;514;755;756;836;837	311;312;313;314;447;448;475;476;548;603;604;605;606;932;933;1031;1032;1033;1034;1035;1048;1049;1050;1051;1052;1053;1054;1055;1056;1057;1058;1620;1621;1800;1801	312;447;476;548;605;932;1034;1055;1621;1801	2;3	182;230
sp|O69753|PHZB1_PSEAE	sp|O69753|PHZB1_PSEAE	4	1	1	>sp|O69753|PHZB1_PSEAE Phenazine biosynthesis protein PhzB 1 OS=Pseudomonas aeruginosa (strain ATCC 15692 / PAO1 / 1C / PRS 101 / LMG 12228) GN=phzB1 PE=3 SV=1	1	4	1	1	22.8	9.9	9.9	18.888	162	162	0	10.214	1168400	1				14	42;43;113;343	False;False;False;True	44;45;125;126;378	75;76;77;211;212;658	188;189;190;191;192;456;457;458;1367	191;192;457;1367	4	139
sp|O69754|PHZF_PSEAE	sp|O69754|PHZF_PSEAE	4	4	4	>sp|O69754|PHZF_PSEAE Trans-2,3-dihydro-3-hydroxyanthranilate isomerase OS=Pseudomonas aeruginosa (strain ATCC 15692 / PAO1 / 1C / PRS 101 / LMG 12228) GN=phzF1 PE=3 SV=2	1	4	4	4	30.2	30.2	30.2	30.342	278	278	0	39.045	8462100	6				15	207;310;312;477	True;True;True;True	230;337;340;523	369;558;563;888	731;732;1130;1149;1911;1912	732;1130;1149;1911	5	98
sp|O82850|RS2_PSEAE	sp|O82850|RS2_PSEAE	1	1	1	>sp|O82850|RS2_PSEAE 30S ribosomal protein S2 OS=Pseudomonas aeruginosa (strain ATCC 15692 / PAO1 / 1C / PRS 101 / LMG 12228) GN=rpsB PE=3 SV=2	1	1	1	1	5.7	5.7	5.7	27.336	246	246	0	9.6186	1398700	4				16	408	TRUE	447;448	770;771	1662;1663;1664;1665	1662	6	49
sp|O82851|EFTS_PSEAE	sp|O82851|EFTS_PSEAE	1	1	1	>sp|O82851|EFTS_PSEAE Elongation factor Ts OS=Pseudomonas aeruginosa (strain ATCC 15692 / PAO1 / 1C / PRS 101 / LMG 12228) GN=tsf PE=3 SV=1	1	1	1	1	4.8	4.8	4.8	30.653	289	289	0	10.16	1466000	1				17	141	TRUE	159	258	522	522
sp|O86428|ILVE_PSEAE	sp|O86428|ILVE_PSEAE	2	2	2	>sp|O86428|ILVE_PSEAE Branched-chain-amino-acid aminotransferase OS=Pseudomonas aeruginosa (strain ATCC 15692 / PAO1 / 1C / PRS 101 / LMG 12228) GN=ilvE PE=1 SV=2	1	2	2	2	6.8	6.8	6.8	34.084	307	307	0	11.056	9914800	2				18	79;81	True;True	88;90	148;149;152	336;337;346	336;346
sp|P00282|AZUR_PSEAE	sp|P00282|AZUR_PSEAE	1	1	1	>sp|P00282|AZUR_PSEAE Azurin OS=Pseudomonas aeruginosa (strain ATCC 15692 / PAO1 / 1C / PRS 101 / LMG 12228) GN=azu PE=1 SV=2	1	1	1	1	9.5	9.5	9.5	16.008	148	148	0	5.7999	5833200	3				19	353	TRUE	388	673;674	1395;1396;1397	1396
sp|P04739|FMPO_PSEAE	sp|P04739|FMPO_PSEAE	3	3	3	>sp|P04739|FMPO_PSEAE Fimbrial protein OS=Pseudomonas aeruginosa (strain ATCC 15692 / PAO1 / 1C / PRS 101 / LMG 12228) GN=pilA PE=1 SV=1	1	3	3	3	29.5	29.5	29.5	15.512	149	149	0	37.479	19883000	7				20	210;372;422	True;True;True	233;409;462	372;703;704;792;793	735;1448;1449;1450;1451;1692;1693	735;1450;1693
sp|P05384|DBHB_PSEAE	sp|P05384|DBHB_PSEAE	2	2	2	>sp|P05384|DBHB_PSEAE DNA-binding protein HU-beta OS=Pseudomonas aeruginosa (strain ATCC 15692 / PAO1 / 1C / PRS 101 / LMG 12228) GN=hupB PE=1 SV=3	1	2	2	2	32.2	32.2	32.2	9.0865	90	90	0	21.196	18898000	6				21	33;373	True;True	35;410	58;59;705	155;156;157;158;159;1452	156;1452
sp|P08308|OTCC_PSEAE	sp|P08308|OTCC_PSEAE	8	8	8	>sp|P08308|OTCC_PSEAE Ornithine carbamoyltransferase, catabolic OS=Pseudomonas aeruginosa (strain ATCC 15692 / PAO1 / 1C / PRS 101 / LMG 12228) GN=arcB PE=1 SV=3	1	8	8	8	27.7	27.7	27.7	38.108	336	336	0	52.888	63262000	25				22	124;136;300;318;329;334;351;506	True;True;True;True;True;True;True;True	138;139;152;153;326;350;351;362;367;368;386;552	227;228;247;248;249;542;581;582;583;584;631;632;639;640;641;642;671;948	477;478;506;507;508;509;510;511;1106;1196;1197;1198;1199;1322;1323;1324;1333;1334;1335;1336;1337;1338;1393;2031;2032	478;511;1106;1196;1322;1336;1393;2032	7;8;9;10;11	101;146;169;258;261
sp|P09591|EFTU_PSEAE	sp|P09591|EFTU_PSEAE	11	11	11	>sp|P09591|EFTU_PSEAE Elongation factor Tu OS=Pseudomonas aeruginosa (strain ATCC 15692 / PAO1 / 1C / PRS 101 / LMG 12228) GN=tufA PE=1 SV=2	1	11	11	11	39.3	39.3	39.3	43.369	397	397	0	129.71	422910000	109				23	18;25;85;93;174;192;302;317;360;419;473	True;True;True;True;True;True;True;True;True;True;True	18;26;27;94;103;104;192;212;328;347;348;349;395;459;518	32;33;45;46;158;159;174;175;176;306;307;308;309;340;341;545;546;572;573;574;575;576;577;578;579;580;685;788;878;879	87;88;89;90;91;92;93;94;95;96;97;98;99;124;125;126;127;128;129;130;131;132;133;134;135;136;137;138;139;356;357;380;381;382;383;384;385;591;592;593;594;595;596;597;598;599;600;601;602;670;671;672;673;674;675;676;677;678;679;1111;1112;1113;1114;1115;1116;1117;1167;1168;1169;1170;1171;1172;1173;1174;1175;1176;1177;1178;1179;1180;1181;1182;1183;1184;1185;1186;1187;1188;1189;1190;1191;1192;1193;1194;1…	94;125;357;380;602;675;1116;1186;1416;1687;1880	12;13;14;15	177;216;362;372
sp|P11221|OPRI_PSEAE	sp|P11221|OPRI_PSEAE	1	1	1	>sp|P11221|OPRI_PSEAE Major outer membrane lipoprotein OS=Pseudomonas aeruginosa (strain ATCC 15692 / PAO1 / 1C / PRS 101 / LMG 12228) GN=oprI PE=3 SV=1	1	1	1	1	12	12	12	8.8348	83	83	0	8.9576	1367900	5				24	299	TRUE	325	540;541	1101;1102;1103;1104;1105	1102
sp|P13794|PORF_PSEAE	sp|P13794|PORF_PSEAE	5	5	5	>sp|P13794|PORF_PSEAE Outer membrane porin F OS=Pseudomonas aeruginosa (strain ATCC 15692 / PAO1 / 1C / PRS 101 / LMG 12228) GN=oprF PE=1 SV=1	1	5	5	5	19.7	19.7	19.7	37.639	350	350	0	57.427	177690000	46				25	100;362;364;439;465	True;True;True;True;True	112;397;399;480;509	190;191;687;688;690;691;817;818;859;860;861;862	410;411;412;413;414;415;416;417;418;419;420;421;422;423;1419;1420;1421;1422;1423;1426;1427;1428;1429;1430;1760;1761;1762;1763;1764;1765;1766;1767;1768;1837;1838;1839;1840;1841;1842;1843;1844;1845;1846;1847;1848;1849	411;1419;1428;1761;1842
sp|P13981|ARCA_PSEAE	sp|P13981|ARCA_PSEAE	17	17	17	>sp|P13981|ARCA_PSEAE Arginine deiminase OS=Pseudomonas aeruginosa (strain ATCC 15692 / PAO1 / 1C / PRS 101 / LMG 12228) GN=arcA PE=1 SV=2	1	17	17	17	51.2	51.2	51.2	46.435	418	418	0	166.14	198210000	75				26	22;89;94;119;134;171;233;241;242;338;346;352;395;403;404;455;485	True;True;True;True;True;True;True;True;True;True;True;True;True;True;True;True;True	23;98;105;132;133;150;189;258;266;267;373;381;387;434;442;443;499;531	41;164;165;177;178;220;221;243;244;301;302;428;429;440;441;650;651;661;662;672;743;744;759;760;761;762;763;764;844;901;902	119;365;366;367;368;386;387;388;468;469;500;501;502;584;585;586;587;876;877;891;892;1351;1352;1353;1354;1355;1370;1371;1372;1373;1374;1375;1376;1394;1568;1569;1570;1571;1627;1628;1629;1630;1631;1632;1633;1634;1635;1636;1637;1638;1639;1640;1641;1642;1643;1644;1645;1646;1647;1648;1649;1650;1651;1652;1653;1654;1655;1813;1814;1927;1928;1929;1930;1931;1932	119;365;388;468;502;585;876;891;892;1354;1371;1394;1569;1627;1635;1814;1927	16	316
sp|P13982|ARCC_PSEAE	sp|P13982|ARCC_PSEAE	3	3	3	>sp|P13982|ARCC_PSEAE Carbamate kinase OS=Pseudomonas aeruginosa (strain ATCC 15692 / PAO1 / 1C / PRS 101 / LMG 12228) GN=arcC PE=3 SV=1	1	3	3	3	12.3	12.3	12.3	33.08	310	310	0	29.31	10562000	6				27	83;239;472	True;True;True	92;264;517	154;155;437;438;876;877	348;349;350;351;888;889;1877;1878	350;889;1878
sp|P15276|ALGP_PSEAE	sp|P15276|ALGP_PSEAE	2	2	2	>sp|P15276|ALGP_PSEAE Transcriptional regulatory protein AlgP OS=Pseudomonas aeruginosa (strain ATCC 15692 / PAO1 / 1C / PRS 101 / LMG 12228) GN=algP PE=4 SV=2	1	2	2	2	6	6	6	34.49	352	352	0	22.112	11650000	3				28	130;429	True;True	146;469	238;239;802	494;495;1706	494;1706
sp|P30718|CH60_PSEAE	sp|P30718|CH60_PSEAE	21	21	21	>sp|P30718|CH60_PSEAE 60 kDa chaperonin OS=Pseudomonas aeruginosa (strain ATCC 15692 / PAO1 / 1C / PRS 101 / LMG 12228) GN=groL PE=1 SV=3	1	21	21	21	52.5	52.5	52.5	57.085	547	547	0	225.31	410350000	141				29	6;20;39;40;46;47;68;69;70;91;126;127;139;159;191;249;314;354;355;374;445	True;True;True;True;True;True;True;True;True;True;True;True;True;True;True;True;True;True;True;True;True	6;20;21;41;42;50;51;52;74;75;76;77;78;100;101;141;142;143;156;157;177;211;274;343;344;389;390;411;486;487	10;11;36;37;38;39;68;69;70;71;72;73;86;87;88;89;90;91;92;93;94;127;128;129;130;131;132;133;134;167;168;169;170;171;172;230;231;232;233;234;235;253;254;255;282;283;339;456;457;566;567;568;569;675;676;677;678;706;707;824;825;826;827	31;32;33;34;35;36;37;38;39;40;41;102;103;104;105;106;107;108;109;110;111;112;113;114;115;116;117;173;174;175;176;177;178;179;180;181;182;183;184;185;186;203;204;205;206;207;208;209;210;211;212;213;214;215;216;217;218;219;220;221;222;223;224;225;226;227;228;229;230;231;232;233;234;235;236;237;238;302;303;304;305;306;307;308;309;310;370;371;372;373;374;375;376;377;378;482;483;484;485;486;487;488;48…	38;115;180;182;209;222;303;304;310;378;483;490;517;557;668;921;1162;1400;1402;1455;1777	17;18;19;20;21;22;23;24	16;69;111;114;233;267;288;389
sp|P37798|ACCC_PSEAE	sp|P37798|ACCC_PSEAE	3	3	3	>sp|P37798|ACCC_PSEAE Biotin carboxylase OS=Pseudomonas aeruginosa (strain ATCC 15692 / PAO1 / 1C / PRS 101 / LMG 12228) GN=accC PE=1 SV=1	1	3	3	3	8.7	8.7	8.7	48.887	449	449	0	18.131	2418800	3				30	321;451;454	True;True;True	354;495;498	617;839;843	1299;1805;1812	1299;1805;1812
sp|P37799|BCCP_PSEAE	sp|P37799|BCCP_PSEAE	8	8	8	>sp|P37799|BCCP_PSEAE Biotin carboxyl carrier protein of acetyl-CoA carboxylase OS=Pseudomonas aeruginosa (strain ATCC 15692 / PAO1 / 1C / PRS 101 / LMG 12228) GN=accB PE=3 SV=1	1	8	8	8	62.2	62.2	62.2	16.455	156	156	0	127.59	1364100000	156				31	5;243;244;272;273;286;385;397	True;True;True;True;True;True;True;True	5;268;269;297;298;312;422;423;436	6;7;8;9;442;443;444;445;446;447;448;449;494;495;496;497;498;499;522;722;723;724;725;746;747;748;749;750;751	6;7;8;9;10;11;12;13;14;15;16;17;18;19;20;21;22;23;24;25;26;27;28;29;30;893;894;895;896;897;898;899;900;901;902;903;904;905;906;907;908;909;910;911;912;913;914;1004;1005;1006;1007;1008;1009;1010;1011;1012;1013;1014;1015;1016;1017;1018;1019;1020;1021;1022;1023;1024;1025;1026;1027;1028;1029;1070;1071;1475;1476;1477;1478;1479;1480;1481;1482;1483;1484;1485;1486;1487;1488;1489;1490;1491;1492;1493;1494;…	10;900;913;1008;1020;1070;1507;1604	25	87
sp|P38100|CARB_PSEAE	sp|P38100|CARB_PSEAE	1	1	1	>sp|P38100|CARB_PSEAE Carbamoyl-phosphate synthase large chain OS=Pseudomonas aeruginosa (strain ATCC 15692 / PAO1 / 1C / PRS 101 / LMG 12228) GN=carB PE=3 SV=3	1	1	1	1	1.7	1.7	1.7	117.33	1073	1073	0	13.165	1492200	1				32	256	TRUE	281	468	936	936
sp|P43336|PHHC_PSEAE	sp|P43336|PHHC_PSEAE	4	4	4	>sp|P43336|PHHC_PSEAE Aromatic-amino-acid aminotransferase OS=Pseudomonas aeruginosa (strain ATCC 15692 / PAO1 / 1C / PRS 101 / LMG 12228) GN=phhC PE=3 SV=2	1	4	4	4	15	15	15	43.273	399	399	0	29.143	12219000	9				33	8;209;247;471	True;True;True;True	8;232;272;516	14;15;371;453;874;875	48;49;734;918;1872;1873;1874;1875;1876	48;734;918;1872
sp|P47204|FTSZ_PSEAE	sp|P47204|FTSZ_PSEAE	1	1	1	>sp|P47204|FTSZ_PSEAE Cell division protein FtsZ OS=Pseudomonas aeruginosa (strain ATCC 15692 / PAO1 / 1C / PRS 101 / LMG 12228) GN=ftsZ PE=1 SV=2	1	1	1	1	4.8	4.8	4.8	41.218	394	394	0	11.121	1128300	3				34	483	TRUE	529	898;899	1922;1923;1924	1922
sp|P53593|SUCC_PSEAE	sp|P53593|SUCC_PSEAE	11	11	11	>sp|P53593|SUCC_PSEAE Succinyl-CoA ligase [ADP-forming] subunit beta OS=Pseudomonas aeruginosa (strain ATCC 15692 / PAO1 / 1C / PRS 101 / LMG 12228) GN=sucC PE=3 SV=2	1	11	11	11	35.8	35.8	35.8	41.542	388	388	0	133.9	94286000	39				35	13;65;74;120;228;261;262;332;341;357;457	True;True;True;True;True;True;True;True;True;True;True	13;71;82;134;253;286;287;365;376;392;501	24;25;121;122;140;222;401;402;476;477;636;637;655;681;682;846;847;848;849	75;76;77;285;286;287;288;289;290;291;292;293;320;470;784;785;786;787;947;948;949;1328;1329;1330;1331;1360;1408;1409;1410;1411;1816;1817;1818;1819;1820;1821;1822;1823;1824;1825	75;290;320;470;784;947;948;1329;1360;1409;1816
sp|P53641|SODF_PSEAE	sp|P53641|SODF_PSEAE	3	3	3	>sp|P53641|SODF_PSEAE Superoxide dismutase [Fe] OS=Pseudomonas aeruginosa (strain ATCC 15692 / PAO1 / 1C / PRS 101 / LMG 12228) GN=sodB PE=3 SV=3	1	3	3	3	21.8	21.8	21.8	21.351	193	193	0	23.333	26078000	8				36	15;416;510	True;True;True	15;456;556	27;28;783;784;954	79;80;81;82;1681;1682;1683;2042	80;1682;2042
sp|P57668|TPX_PSEAE	sp|P57668|TPX_PSEAE	1	1	1	>sp|P57668|TPX_PSEAE Probable thiol peroxidase OS=Pseudomonas aeruginosa (strain ATCC 15692 / PAO1 / 1C / PRS 101 / LMG 12228) GN=tpx PE=3 SV=1	1	1	1	1	7.9	7.9	7.9	17.234	165	165	0	6.6464	4083300	2				37	179	TRUE	197	317;318	612;613;614	612
sp|Q51422|SYDND_PSEAE	sp|Q51422|SYDND_PSEAE	1	1	1	>sp|Q51422|SYDND_PSEAE Aspartate--tRNA(Asp/Asn) ligase OS=Pseudomonas aeruginosa (strain ATCC 15692 / PAO1 / 1C / PRS 101 / LMG 12228) GN=aspS PE=1 SV=2	1	1	1	1	3	3	3	66.207	591	591	0	6.5118	222050	2				38	413	TRUE	453	778;779	1676;1677	1676	26	565
sp|Q51561|RPOB_PSEAE	sp|Q51561|RPOB_PSEAE	5	5	5	>sp|Q51561|RPOB_PSEAE DNA-directed RNA polymerase subunit beta OS=Pseudomonas aeruginosa (strain ATCC 15692 / PAO1 / 1C / PRS 101 / LMG 12228) GN=rpoB PE=3 SV=2	1	5	5	5	6.6	6.6	6.6	150.84	1357	1357	0	37.839	11667000	13				39	24;35;315;361;388	True;True;True;True;True	25;37;345;396;426	43;44;62;63;570;686;729	121;122;123;163;164;165;166;167;1164;1417;1418;1520;1521	122;166;1164;1418;1521
sp|Q51567|SUCD_PSEAE	sp|Q51567|SUCD_PSEAE	4	4	4	>sp|Q51567|SUCD_PSEAE Succinyl-CoA ligase [ADP-forming] subunit alpha OS=Pseudomonas aeruginosa (strain ATCC 15692 / PAO1 / 1C / PRS 101 / LMG 12228) GN=sucD PE=3 SV=2	1	4	4	4	19.3	19.3	19.3	30.266	295	295	0	28.132	19785000	11				40	31;48;135;168	True;True;True;True	33;53;151;186	55;56;95;96;97;245;246;297	151;152;153;239;240;241;242;503;504;505;579;580	151;241;503;579
sp|Q59636|NDK_PSEAE	sp|Q59636|NDK_PSEAE	1	1	1	>sp|Q59636|NDK_PSEAE Nucleoside diphosphate kinase OS=Pseudomonas aeruginosa (strain ATCC 15692 / PAO1 / 1C / PRS 101 / LMG 12228) GN=ndk PE=3 SV=2	1	1	1	1	6.3	6.3	6.3	15.592	143	143	0	6.5481	5417400	2				41	340	TRUE	375	653;654	1358;1359	1359
sp|Q59637|ODP1_PSEAE	sp|Q59637|ODP1_PSEAE	3	3	3	>sp|Q59637|ODP1_PSEAE Pyruvate dehydrogenase E1 component OS=Pseudomonas aeruginosa (strain ATCC 15692 / PAO1 / 1C / PRS 101 / LMG 12228) GN=aceE PE=3 SV=2	1	3	3	3	3.7	3.7	3.7	99.563	882	882	0	21.045	9847200	7				42	98;213;378	True;True;True	110;236;415	187;376;377;712;713	406;740;741;1460;1461;1462;1463	406;741;1461
sp|Q59638|ODP2_PSEAE	sp|Q59638|ODP2_PSEAE	1	1	1	>sp|Q59638|ODP2_PSEAE Dihydrolipoyllysine-residue acetyltransferase component of pyruvate dehydrogenase complex OS=Pseudomonas aeruginosa (strain ATCC 15692 / PAO1 / 1C / PRS 101 / LMG 12228) GN=aceF PE=2 SV=2	1	1	1	1	2	2	2	56.708	547	547	0	6.3571	0	1				43	222	TRUE	246	392	766	766
sp|Q9HT16|ATPF_PSEAE	sp|Q9HT16|ATPF_PSEAE	2	2	2	>sp|Q9HT16|ATPF_PSEAE ATP synthase subunit b OS=Pseudomonas aeruginosa (strain ATCC 15692 / PAO1 / 1C / PRS 101 / LMG 12228) GN=atpF PE=3 SV=1	1	2	2	2	15.4	15.4	15.4	16.956	156	156	0	14.462	1969000	2				44	54;59	True;True	59;64	105;113	255;277	255;277
sp|Q9HT18|ATPA_PSEAE	sp|Q9HT18|ATPA_PSEAE	13	13	13	>sp|Q9HT18|ATPA_PSEAE ATP synthase subunit alpha OS=Pseudomonas aeruginosa (strain ATCC 15692 / PAO1 / 1C / PRS 101 / LMG 12228) GN=atpA PE=3 SV=1	1	13	13	13	29	29	29	55.393	514	514	0	103.5	87940000	30				45	110;158;163;219;316;325;391;392;399;434;450;481;482	True;True;True;True;True;True;True;True;True;True;True;True;True	122;176;181;243;346;358;429;430;431;438;475;494;527;528	207;208;281;288;289;388;389;571;623;624;734;735;736;737;738;753;754;809;838;894;895;896;897	451;452;453;553;565;566;567;762;763;1165;1166;1311;1312;1313;1557;1558;1559;1560;1561;1618;1619;1718;1719;1802;1803;1804;1918;1919;1920;1921	452;553;565;762;1166;1311;1558;1560;1618;1718;1804;1919;1921	27;28	1;157
sp|Q9HT19|ATPG_PSEAE	sp|Q9HT19|ATPG_PSEAE	1	1	1	>sp|Q9HT19|ATPG_PSEAE ATP synthase gamma chain OS=Pseudomonas aeruginosa (strain ATCC 15692 / PAO1 / 1C / PRS 101 / LMG 12228) GN=atpG PE=3 SV=1	1	1	1	1	6.6	6.6	6.6	31.553	286	286	0	10.183	3103600	4				46	324	TRUE	357	621;622	1307;1308;1309;1310	1308
sp|Q9HT20|ATPB_PSEAE	sp|Q9HT20|ATPB_PSEAE	9	9	9	>sp|Q9HT20|ATPB_PSEAE ATP synthase subunit beta OS=Pseudomonas aeruginosa (strain ATCC 15692 / PAO1 / 1C / PRS 101 / LMG 12228) GN=atpD PE=3 SV=1	1	9	9	9	29	29	29	49.499	458	458	0	87.202	36321000	18				47	99;107;146;178;356;432;433;448;509	True;True;True;True;True;True;True;True;True	111;119;164;196;391;472;473;474;492;555	188;189;203;265;266;316;679;680;805;806;807;808;834;835;952;953	407;408;409;446;535;536;537;611;1404;1405;1406;1407;1714;1715;1716;1717;1798;1799;2040;2041	409;446;536;611;1407;1714;1717;1798;2041	29	225
sp|Q9HTD7|ASPA_PSEAE	sp|Q9HTD7|ASPA_PSEAE	1	1	1	>sp|Q9HTD7|ASPA_PSEAE Aspartate ammonia-lyase OS=Pseudomonas aeruginosa (strain ATCC 15692 / PAO1 / 1C / PRS 101 / LMG 12228) GN=aspA PE=3 SV=1	1	1	1	1	4.2	4.2	4.2	51.069	474	474	0	6.0211	1075500	1				48	92	TRUE	102	173	379	379
sp|Q9HTN8|RL28_PSEAE	sp|Q9HTN8|RL28_PSEAE	1	1	1	>sp|Q9HTN8|RL28_PSEAE 50S ribosomal protein L28 OS=Pseudomonas aeruginosa (strain ATCC 15692 / PAO1 / 1C / PRS 101 / LMG 12228) GN=rpmB PE=3 SV=1	1	1	1	1	12.8	12.8	12.8	9.0655	78	78	0	6.7588	988560	1				49	172	TRUE	190	303	588	588
sp|Q9HU21|RMLC_PSEAE	sp|Q9HU21|RMLC_PSEAE	1	1	1	>sp|Q9HU21|RMLC_PSEAE dTDP-4-dehydrorhamnose 3,5-epimerase OS=Pseudomonas aeruginosa (strain ATCC 15692 / PAO1 / 1C / PRS 101 / LMG 12228) GN=rmlC PE=1 SV=1	1	1	1	1	5.5	5.5	5.5	20.766	181	181	0	5.6533	477670	0				50	161	TRUE	179	285	561	561
sp|Q9HU65|GLNA_PSEAE	sp|Q9HU65|GLNA_PSEAE	4	4	4	>sp|Q9HU65|GLNA_PSEAE Glutamine synthetase OS=Pseudomonas aeruginosa (strain ATCC 15692 / PAO1 / 1C / PRS 101 / LMG 12228) GN=glnA PE=1 SV=1	1	4	4	4	17.3	17.3	17.3	51.944	469	469	0	37.651	5645700	9				51	38;150;304;337	True;True;True;True	40;168;330;331;372	67;272;548;549;648;649	172;543;1119;1120;1346;1347;1348;1349;1350	172;543;1119;1346	30;31	332;377
sp|Q9HU83|HUTU_PSEAE	sp|Q9HU83|HUTU_PSEAE	1	1	1	>sp|Q9HU83|HUTU_PSEAE Urocanate hydratase OS=Pseudomonas aeruginosa (strain ATCC 15692 / PAO1 / 1C / PRS 101 / LMG 12228) GN=hutU PE=1 SV=1	1	1	1	1	3.4	3.4	3.4	61.193	559	559	0	6.2432	430830	1				52	28	TRUE	30	51	146	146
sp|Q9HUM0|HFQ_PSEAE	sp|Q9HUM0|HFQ_PSEAE	1	1	1	>sp|Q9HUM0|HFQ_PSEAE RNA-binding protein Hfq OS=Pseudomonas aeruginosa (strain ATCC 15692 / PAO1 / 1C / PRS 101 / LMG 12228) GN=hfq PE=1 SV=1	1	1	1	1	15.9	15.9	15.9	9.1034	82	82	0	5.7593	1087700	2				53	294	TRUE	320	531;532	1082;1083	1083
sp|Q9HUM6|PURA_PSEAE	sp|Q9HUM6|PURA_PSEAE	2	2	2	>sp|Q9HUM6|PURA_PSEAE Adenylosuccinate synthetase OS=Pseudomonas aeruginosa (strain ATCC 15692 / PAO1 / 1C / PRS 101 / LMG 12228) GN=purA PE=3 SV=1	1	2	2	2	5.6	5.6	5.6	46.814	430	430	0	10.925	747100	1				54	237;407	True;True	262;446	435;769	886;1661	886;1661
sp|Q9HV43|DNAK_PSEAE	sp|Q9HV43|DNAK_PSEAE	3	3	3	>sp|Q9HV43|DNAK_PSEAE Chaperone protein DnaK OS=Pseudomonas aeruginosa (strain ATCC 15692 / PAO1 / 1C / PRS 101 / LMG 12228) GN=dnaK PE=3 SV=1	1	3	3	3	7.4	7.4	7.4	68.402	637	637	0	29.27	10791000	5				55	90;349;420	True;True;True	99;384;460	166;669;789;790	369;1390;1391;1688;1689;1690	369;1391;1690	32	88
sp|Q9HV59|PNP_PSEAE	sp|Q9HV59|PNP_PSEAE	1	1	1	>sp|Q9HV59|PNP_PSEAE Polyribonucleotide nucleotidyltransferase OS=Pseudomonas aeruginosa (strain ATCC 15692 / PAO1 / 1C / PRS 101 / LMG 12228) GN=pnp PE=3 SV=1	1	1	1	1	1.9	1.9	1.9	75.452	701	701	0	5.8018	1236400	2				56	49	TRUE	54	98	243;244	244
sp|Q9HVA2|ILVC_PSEAE	sp|Q9HVA2|ILVC_PSEAE	1	1	1	>sp|Q9HVA2|ILVC_PSEAE Ketol-acid reductoisomerase OS=Pseudomonas aeruginosa (strain ATCC 15692 / PAO1 / 1C / PRS 101 / LMG 12228) GN=ilvC PE=1 SV=1	1	1	1	1	5.6	5.6	5.6	36.424	338	338	0	10.588	3940400	4				57	167	TRUE	185	295;296	575;576;577;578	578
sp|Q9HVM1|RS20_PSEAE	sp|Q9HVM1|RS20_PSEAE	1	1	1	>sp|Q9HVM1|RS20_PSEAE 30S ribosomal protein S20 OS=Pseudomonas aeruginosa (strain ATCC 15692 / PAO1 / 1C / PRS 101 / LMG 12228) GN=rpsT PE=1 SV=3	1	1	1	1	15.4	15.4	15.4	9.9175	91	91	0	5.7203	1242000	1				58	55	TRUE	60	106	256	256
sp|Q9HVY3|RS9_PSEAE	sp|Q9HVY3|RS9_PSEAE	1	1	1	>sp|Q9HVY3|RS9_PSEAE 30S ribosomal protein S9 OS=Pseudomonas aeruginosa (strain ATCC 15692 / PAO1 / 1C / PRS 101 / LMG 12228) GN=rpsI PE=3 SV=1	1	1	1	1	7.7	7.7	7.7	14.615	130	130	0	7.4719	3987600	3				59	36	TRUE	38	64;65	168;169;170	170
sp|Q9HWC6|RL1_PSEAE	sp|Q9HWC6|RL1_PSEAE	1	1	1	>sp|Q9HWC6|RL1_PSEAE 50S ribosomal protein L1 OS=Pseudomonas aeruginosa (strain ATCC 15692 / PAO1 / 1C / PRS 101 / LMG 12228) GN=rplA PE=3 SV=1	1	1	1	1	5.2	5.2	5.2	24.234	231	231	0	7.8461	868190	1				60	486	TRUE	532	903	1933	1933
sp|Q9HWC8|RL7_PSEAE	sp|Q9HWC8|RL7_PSEAE	1	1	1	>sp|Q9HWC8|RL7_PSEAE 50S ribosomal protein L7/L12 OS=Pseudomonas aeruginosa (strain ATCC 15692 / PAO1 / 1C / PRS 101 / LMG 12228) GN=rplL PE=3 SV=1	1	1	1	1	9	9	9	12.479	122	122	0	5.6641	648750	1				61	76	TRUE	85	145	333	333
sp|Q9HWC9|RPOC_PSEAE	sp|Q9HWC9|RPOC_PSEAE	2	2	2	>sp|Q9HWC9|RPOC_PSEAE DNA-directed RNA polymerase subunit beta OS=Pseudomonas aeruginosa (strain ATCC 15692 / PAO1 / 1C / PRS 101 / LMG 12228) GN=rpoC PE=3 SV=1	1	2	2	2	2.1	2.1	2.1	154.38	1399	1399	0	15.883	1540900	5				62	115;125	True;True	128;140	214;229	460;461;479;480;481	461;479
sp|Q9HWD1|RS7_PSEAE	sp|Q9HWD1|RS7_PSEAE	2	2	2	>sp|Q9HWD1|RS7_PSEAE 30S ribosomal protein S7 OS=Pseudomonas aeruginosa (strain ATCC 15692 / PAO1 / 1C / PRS 101 / LMG 12228) GN=rpsG PE=3 SV=1	1	2	2	2	15.4	15.4	15.4	17.504	156	156	0	13.752	4094400	3				63	32;248	True;True	34;273	57;454;455	154;919;920	154;920
sp|Q9HWD2|EFG1_PSEAE;sp|Q9I244|EFG2_PSEAE	sp|Q9HWD2|EFG1_PSEAE	12;5	12;5	12;5	>sp|Q9HWD2|EFG1_PSEAE Elongation factor G 1 OS=Pseudomonas aeruginosa (strain ATCC 15692 / PAO1 / 1C / PRS 101 / LMG 12228) GN=fusA PE=1 SV=1	2	12	12	12	26.5	26.5	26.5	77.784	706	706;702	0	115.54	56977000	22				64	12;17;112;177;189;198;252;268;309;328;489;493	True;True;True;True;True;True;True;True;True;True;True;True	12;17;124;195;209;218;277;293;336;361;535;539	22;23;31;210;314;315;337;349;462;463;490;557;629;630;907;908;915;916	71;72;73;74;86;455;609;610;666;691;692;930;931;998;999;1129;1320;1321;1939;1940;1941;1948;1949	72;86;455;610;666;691;930;999;1129;1321;1940;1948	33;34	388;648
sp|Q9HWD5|RL3_PSEAE	sp|Q9HWD5|RL3_PSEAE	1	1	1	>sp|Q9HWD5|RL3_PSEAE 50S ribosomal protein L3 OS=Pseudomonas aeruginosa (strain ATCC 15692 / PAO1 / 1C / PRS 101 / LMG 12228) GN=rplC PE=3 SV=1	1	1	1	1	4.7	4.7	4.7	22.591	211	211	0	6.381	2220000	1				65	480	TRUE	526	893	1917	1917
sp|Q9HWD8|RL2_PSEAE	sp|Q9HWD8|RL2_PSEAE	2	2	2	>sp|Q9HWD8|RL2_PSEAE 50S ribosomal protein L2 OS=Pseudomonas aeruginosa (strain ATCC 15692 / PAO1 / 1C / PRS 101 / LMG 12228) GN=rplB PE=3 SV=1	1	2	2	2	11.4	11.4	11.4	29.579	273	273	0	18.791	17530000	8				66	66;187	True;True	72;207	123;124;125;334;335	294;295;296;297;298;661;662;663	298;661
sp|Q9HWE2|RL16_PSEAE	sp|Q9HWE2|RL16_PSEAE	3	3	3	>sp|Q9HWE2|RL16_PSEAE 50S ribosomal protein L16 OS=Pseudomonas aeruginosa (strain ATCC 15692 / PAO1 / 1C / PRS 101 / LMG 12228) GN=rplP PE=3 SV=1	1	3	3	3	23.4	23.4	23.4	15.401	137	137	0	21.702	19039000	6				67	293;464;478	True;True;True	319;508;524	530;857;858;889;890	1081;1834;1835;1836;1913;1914	1081;1836;1913
sp|Q9HWE4|RS17_PSEAE	sp|Q9HWE4|RS17_PSEAE	1	1	1	>sp|Q9HWE4|RS17_PSEAE 30S ribosomal protein S17 OS=Pseudomonas aeruginosa (strain ATCC 15692 / PAO1 / 1C / PRS 101 / LMG 12228) GN=rpsQ PE=3 SV=1	1	1	1	1	11.4	11.4	11.4	10.086	88	88	0	7.4098	1251500	1				68	78	TRUE	87	147	335	335
sp|Q9HWE5|RL14_PSEAE	sp|Q9HWE5|RL14_PSEAE	1	1	1	>sp|Q9HWE5|RL14_PSEAE 50S ribosomal protein L14 OS=Pseudomonas aeruginosa (strain ATCC 15692 / PAO1 / 1C / PRS 101 / LMG 12228) GN=rplN PE=3 SV=1	1	1	1	1	9.8	9.8	9.8	13.412	122	122	0	6.7798	5508500	2				69	138	TRUE	155	251;252	513;514	514
sp|Q9HWE7|RL5_PSEAE	sp|Q9HWE7|RL5_PSEAE	1	1	1	>sp|Q9HWE7|RL5_PSEAE 50S ribosomal protein L5 OS=Pseudomonas aeruginosa (strain ATCC 15692 / PAO1 / 1C / PRS 101 / LMG 12228) GN=rplE PE=3 SV=1	1	1	1	1	6.1	6.1	6.1	20.392	179	179	0	6.9252	1196200	1				70	212	TRUE	235	375	739	739
sp|Q9HWE8|RS14_PSEAE	sp|Q9HWE8|RS14_PSEAE	1	1	1	>sp|Q9HWE8|RS14_PSEAE 30S ribosomal protein S14 OS=Pseudomonas aeruginosa (strain ATCC 15692 / PAO1 / 1C / PRS 101 / LMG 12228) GN=rpsN PE=3 SV=1	1	1	1	1	12.9	12.9	12.9	11.565	101	101	0	8.1471	1420300	3				71	26	TRUE	28	47;48	140;141;142	140
sp|Q9HWF2|RS5_PSEAE	sp|Q9HWF2|RS5_PSEAE	1	1	1	>sp|Q9HWF2|RS5_PSEAE 30S ribosomal protein S5 OS=Pseudomonas aeruginosa (strain ATCC 15692 / PAO1 / 1C / PRS 101 / LMG 12228) GN=rpsE PE=3 SV=1	1	1	1	1	8.4	8.4	8.4	17.625	166	166	0	9.9183	4912200	3				72	73	TRUE	81	138;139	317;318;319	318
sp|Q9HWF4|RL15_PSEAE	sp|Q9HWF4|RL15_PSEAE	1	1	1	>sp|Q9HWF4|RL15_PSEAE 50S ribosomal protein L15 OS=Pseudomonas aeruginosa (strain ATCC 15692 / PAO1 / 1C / PRS 101 / LMG 12228) GN=rplO PE=3 SV=1	1	1	1	1	8.3	8.3	8.3	15.174	144	144	0	7.7614	1004800	1				73	441	TRUE	482	820	1770	1770
sp|Q9HWF7|RS13_PSEAE	sp|Q9HWF7|RS13_PSEAE	1	1	1	>sp|Q9HWF7|RS13_PSEAE 30S ribosomal protein S13 OS=Pseudomonas aeruginosa (strain ATCC 15692 / PAO1 / 1C / PRS 101 / LMG 12228) GN=rpsM PE=3 SV=1	1	1	1	1	11	11	11	13.265	118	118	0	6.422	1113700	1				74	217	TRUE	241	386	760	760
sp|Q9HXZ2|ACCA_PSEAE	sp|Q9HXZ2|ACCA_PSEAE	1	1	1	>sp|Q9HXZ2|ACCA_PSEAE Acetyl-coenzyme A carboxylase carboxyl transferase subunit alpha OS=Pseudomonas aeruginosa (strain ATCC 15692 / PAO1 / 1C / PRS 101 / LMG 12228) GN=accA PE=1 SV=1	1	1	1	1	4.4	4.4	4.4	34.947	316	316	1	-2	0	1	+			75	50	TRUE	55	99	245	245	35	248
sp|Q9HXZ5|ENO_PSEAE	sp|Q9HXZ5|ENO_PSEAE	1	1	1	>sp|Q9HXZ5|ENO_PSEAE Enolase OS=Pseudomonas aeruginosa (strain ATCC 15692 / PAO1 / 1C / PRS 101 / LMG 12228) GN=eno PE=3 SV=1	1	1	1	1	5.1	5.1	5.1	45.195	429	429	0	11.112	1112600	1				76	375	TRUE	412	708	1456	1456
sp|Q9HYR9|CLPP2_PSEAE	sp|Q9HYR9|CLPP2_PSEAE	1	1	1	>sp|Q9HYR9|CLPP2_PSEAE ATP-dependent Clp protease proteolytic subunit 2 OS=Pseudomonas aeruginosa (strain ATCC 15692 / PAO1 / 1C / PRS 101 / LMG 12228) GN=clpP2 PE=3 SV=1	1	1	1	1	6	6	6	22.142	201	201	0	10.01	466610	1				77	205	TRUE	227	364	722	722
sp|Q9HZ71|RS1_PSEAE	sp|Q9HZ71|RS1_PSEAE	5	5	5	>sp|Q9HZ71|RS1_PSEAE 30S ribosomal protein S1 OS=Pseudomonas aeruginosa (strain ATCC 15692 / PAO1 / 1C / PRS 101 / LMG 12228) GN=rpsA PE=3 SV=1	1	5	5	5	11.6	11.6	11.6	61.869	559	559	0	44.434	24327000	11				78	16;105;156;166;358	True;True;True;True;True	16;117;174;184;393	29;30;200;201;278;279;293;294;683	83;84;85;442;443;444;549;550;551;573;574;1412	83;444;549;574;1412
sp|Q9HZ76|WBPE_PSEAE	sp|Q9HZ76|WBPE_PSEAE	1	1	1	>sp|Q9HZ76|WBPE_PSEAE UDP-2-acetamido-2-deoxy-3-oxo-D-glucuronate aminotransferase OS=Pseudomonas aeruginosa (strain ATCC 15692 / PAO1 / 1C / PRS 101 / LMG 12228) GN=wbpE PE=1 SV=1	1	1	1	1	5	5	5	38.924	359	359	0	8.9937	942270	1				79	499	TRUE	545	936	2012	2012
sp|Q9HZE0|DHE2_PSEAE	sp|Q9HZE0|DHE2_PSEAE	7	7	7	>sp|Q9HZE0|DHE2_PSEAE NAD-specific glutamate dehydrogenase OS=Pseudomonas aeruginosa (strain ATCC 15692 / PAO1 / 1C / PRS 101 / LMG 12228) GN=gdhB PE=1 SV=1	1	7	7	7	7.1	7.1	7.1	182.64	1620	1620	0	59.752	7849000	14				80	53;84;121;266;285;306;508	True;True;True;True;True;True;True	58;93;135;291;311;333;554	104;156;157;223;485;521;552;553;951	253;254;352;353;354;355;471;984;985;1069;1123;1124;1125;2039	253;354;471;984;1069;1125;2039
sp|Q9HZJ2|FADB_PSEAE	sp|Q9HZJ2|FADB_PSEAE	2	2	2	>sp|Q9HZJ2|FADB_PSEAE Fatty acid oxidation complex subunit alpha OS=Pseudomonas aeruginosa (strain ATCC 15692 / PAO1 / 1C / PRS 101 / LMG 12228) GN=fadB PE=3 SV=1	1	2	2	2	5.2	5.2	5.2	76.953	715	715	0	27.734	2909300	4				81	165;415	True;True	183;455	292;781;782	571;572;1679;1680	572;1679
sp|Q9HZP6|ETFB_PSEAE	sp|Q9HZP6|ETFB_PSEAE	3	3	3	>sp|Q9HZP6|ETFB_PSEAE Electron transfer flavoprotein subunit beta OS=Pseudomonas aeruginosa (strain ATCC 15692 / PAO1 / 1C / PRS 101 / LMG 12228) GN=etfB PE=3 SV=1	1	3	3	3	19.7	19.7	19.7	26.376	249	249	0	26.113	5757700	5				82	77;117;443	True;True;True	86;130;484	146;217;218;822	334;464;465;466;1772	334;465;1772
sp|Q9I0A2|RL20_PSEAE	sp|Q9I0A2|RL20_PSEAE	1	1	1	>sp|Q9I0A2|RL20_PSEAE 50S ribosomal protein L20 OS=Pseudomonas aeruginosa (strain ATCC 15692 / PAO1 / 1C / PRS 101 / LMG 12228) GN=rplT PE=3 SV=1	1	1	1	1	7.6	7.6	7.6	13.365	118	118	0	6.0748	2893200	1				83	0	TRUE	0	0	0	0
sp|Q9I0J6|NUOG_PSEAE	sp|Q9I0J6|NUOG_PSEAE	2	2	2	>sp|Q9I0J6|NUOG_PSEAE NADH-quinone oxidoreductase subunit G OS=Pseudomonas aeruginosa (strain ATCC 15692 / PAO1 / 1C / PRS 101 / LMG 12228) GN=nuoG PE=3 SV=1	1	2	2	2	2.8	2.8	2.8	98.999	905	905	0	13.555	3719400	3				84	64;296	True;True	70;322	120;535;536	284;1088;1089;1090	284;1090
sp|Q9I0J9|NUOCD_PSEAE	sp|Q9I0J9|NUOCD_PSEAE	1	1	1	>sp|Q9I0J9|NUOCD_PSEAE NADH-quinone oxidoreductase subunit C/D OS=Pseudomonas aeruginosa (strain ATCC 15692 / PAO1 / 1C / PRS 101 / LMG 12228) GN=nuoC PE=3 SV=1	1	1	1	1	1.5	1.5	1.5	68.322	593	593	0	8.4208	559420	1				85	274	TRUE	299	500	1030	1030
sp|Q9I0K4|ACEA_PSEAE	sp|Q9I0K4|ACEA_PSEAE	7	7	7	>sp|Q9I0K4|ACEA_PSEAE Isocitrate lyase OS=Pseudomonas aeruginosa (strain ATCC 15692 / PAO1 / 1C / PRS 101 / LMG 12228) GN=PA2634 PE=1 SV=1	1	7	7	7	17.1	17.1	17.1	58.886	531	531	0	83.576	20068000	18				86	122;255;305;327;359;401;479	True;True;True;True;True;True;True	136;280;332;360;394;440;525	224;225;467;550;551;627;628;684;757;891;892	472;473;474;935;1121;1122;1316;1317;1318;1319;1413;1414;1622;1623;1624;1625;1915;1916	474;935;1122;1319;1414;1622;1916
sp|Q9I0Q0|PQSH_PSEAE	sp|Q9I0Q0|PQSH_PSEAE	1	1	1	>sp|Q9I0Q0|PQSH_PSEAE 2-heptyl-3-hydroxy-4(1H)-quinolone synthase OS=Pseudomonas aeruginosa (strain ATCC 15692 / PAO1 / 1C / PRS 101 / LMG 12228) GN=pqsH PE=3 SV=1	1	1	1	1	7.6	7.6	7.6	42.081	382	382	0	6.6861	1551200	2				87	63	TRUE	69	118;119	282;283	283
sp|Q9I1L9|DLDH1_PSEAE	sp|Q9I1L9|DLDH1_PSEAE	2	2	2	>sp|Q9I1L9|DLDH1_PSEAE Dihydrolipoyl dehydrogenase OS=Pseudomonas aeruginosa (strain ATCC 15692 / PAO1 / 1C / PRS 101 / LMG 12228) GN=lpdV PE=1 SV=1	1	2	2	2	6	6	6	48.588	464	464	0	12.934	6811000	2				88	116;452	True;True	129;496	215;216;840	462;463;1806	463;1806
sp|Q9I1M0|ODB2_PSEAE	sp|Q9I1M0|ODB2_PSEAE	1	1	1	>sp|Q9I1M0|ODB2_PSEAE Lipoamide acyltransferase component of branched-chain alpha-keto acid dehydrogenase complex OS=Pseudomonas aeruginosa (strain ATCC 15692 / PAO1 / 1C / PRS 101 / LMG 12228) GN=bkdB PE=1 SV=1	1	1	1	1	2.3	2.3	2.3	45.774	428	428	0	6.3422	402080	1				89	495	TRUE	541	918	1951	1951
sp|Q9I1M2|ODBA_PSEAE	sp|Q9I1M2|ODBA_PSEAE	1	1	1	>sp|Q9I1M2|ODBA_PSEAE 2-oxoisovalerate dehydrogenase subunit alpha OS=Pseudomonas aeruginosa (strain ATCC 15692 / PAO1 / 1C / PRS 101 / LMG 12228) GN=bkdA1 PE=3 SV=1	1	1	1	1	3.2	3.2	3.2	45.256	410	410	0	6.2145	1015100	1				90	330	TRUE	363	633	1325	1325
sp|Q9I1Z9|Y2116_PSEAE	sp|Q9I1Z9|Y2116_PSEAE	1	1	1	>sp|Q9I1Z9|Y2116_PSEAE UPF0317 protein PA2116 OS=Pseudomonas aeruginosa (strain ATCC 15692 / PAO1 / 1C / PRS 101 / LMG 12228) GN=PA2116 PE=3 SV=1	1	1	1	1	6.4	6.4	6.4	29.221	265	265	0	6.2971	1366600	1				91	344	TRUE	379	659	1368	1368
sp|Q9I2A8|ATOB_PSEAE	sp|Q9I2A8|ATOB_PSEAE	1	1	1	>sp|Q9I2A8|ATOB_PSEAE Acetyl-CoA acetyltransferase OS=Pseudomonas aeruginosa (strain ATCC 15692 / PAO1 / 1C / PRS 101 / LMG 12228) GN=atoB PE=3 SV=1	1	1	1	1	3.6	3.6	3.6	40.405	393	393	0	5.8101	3248200	0				92	19	TRUE	19	34;35	100;101	100	36	82
sp|Q9I2V5|ACNB_PSEAE	sp|Q9I2V5|ACNB_PSEAE	8	8	8	>sp|Q9I2V5|ACNB_PSEAE Aconitate hydratase B OS=Pseudomonas aeruginosa (strain ATCC 15692 / PAO1 / 1C / PRS 101 / LMG 12228) GN=acnB PE=3 SV=1	1	8	8	8	14.3	14.3	14.3	93.627	869	869	0	71.699	30894000	23				93	11;88;164;264;292;367;394;475	True;True;True;True;True;True;True;True	11;97;182;289;318;402;433;520	20;21;162;163;290;291;479;480;529;694;741;742;882;883	69;70;360;361;362;363;364;568;569;570;951;952;953;954;1080;1433;1564;1565;1566;1567;1893;1894;1895	70;361;570;953;1080;1433;1564;1894
sp|Q9I3C5|HTPG_PSEAE	sp|Q9I3C5|HTPG_PSEAE	1	1	1	>sp|Q9I3C5|HTPG_PSEAE Chaperone protein HtpG OS=Pseudomonas aeruginosa (strain ATCC 15692 / PAO1 / 1C / PRS 101 / LMG 12228) GN=htpG PE=3 SV=1	1	1	1	1	1.6	1.6	1.6	71.667	634	634	0	6.6917	885200	0				94	459	TRUE	503	852	1828	1828
sp|Q9I3D1|DLDH2_PSEAE	sp|Q9I3D1|DLDH2_PSEAE	8	8	8	>sp|Q9I3D1|DLDH2_PSEAE Dihydrolipoyl dehydrogenase OS=Pseudomonas aeruginosa (strain ATCC 15692 / PAO1 / 1C / PRS 101 / LMG 12228) GN=lpdG PE=3 SV=1	1	8	8	8	25.1	25.1	25.1	50.164	478	478	0	83.746	47100000	24				95	10;44;57;62;190;331;363;417	True;True;True;True;True;True;True;True	10;46;47;62;67;68;210;364;398;457	18;19;78;79;109;110;116;117;338;634;635;689;785;786	62;63;64;65;66;67;68;193;194;268;269;270;271;272;273;280;281;667;1326;1327;1424;1425;1684;1685	62;194;272;280;667;1326;1424;1685	37;38	336;394
sp|Q9I3F5|ACNA_PSEAE	sp|Q9I3F5|ACNA_PSEAE	12	12	12	>sp|Q9I3F5|ACNA_PSEAE Aconitate hydratase A OS=Pseudomonas aeruginosa (strain ATCC 15692 / PAO1 / 1C / PRS 101 / LMG 12228) GN=acnA PE=3 SV=1	1	12	12	12	23.4	23.4	23.4	99.147	910	910	0	96.565	42042000	31				96	27;114;152;201;280;411;428;431;458;462;463;507	True;True;True;True;True;True;True;True;True;True;True;True	29;127;170;223;305;451;468;471;502;506;507;553	49;50;213;274;359;509;774;775;801;804;850;851;855;856;949;950	143;144;145;459;545;709;1045;1668;1669;1670;1671;1672;1673;1704;1705;1708;1709;1710;1711;1712;1713;1826;1827;1832;1833;2033;2034;2035;2036;2037;2038	145;459;545;709;1045;1672;1704;1710;1827;1832;1833;2037	39	88
sp|Q9I558|ACSA1_PSEAE	sp|Q9I558|ACSA1_PSEAE	1	1	1	>sp|Q9I558|ACSA1_PSEAE Acetyl-coenzyme A synthetase 1 OS=Pseudomonas aeruginosa (strain ATCC 15692 / PAO1 / 1C / PRS 101 / LMG 12228) GN=acsA1 PE=3 SV=1	1	1	1	1	2.9	2.9	2.9	71.762	651	651	0	6.2057	1116300	1				97	118	TRUE	131	219	467	467
sp|Q9I576|HPPD_PSEAE	sp|Q9I576|HPPD_PSEAE	2	2	2	>sp|Q9I576|HPPD_PSEAE 4-hydroxyphenylpyruvate dioxygenase OS=Pseudomonas aeruginosa (strain ATCC 15692 / PAO1 / 1C / PRS 101 / LMG 12228) GN=hpd PE=3 SV=1	1	2	2	2	7.3	7.3	7.3	39.912	357	357	0	32.751	7634300	8				98	148;323	True;True	166;356	268;269;619;620	539;540;1301;1302;1303;1304;1305;1306	539;1302	40	269
sp|Q9I589|CBPD_PSEAE	sp|Q9I589|CBPD_PSEAE	1	1	1	>sp|Q9I589|CBPD_PSEAE Chitin-binding protein CbpD OS=Pseudomonas aeruginosa (strain ATCC 15692 / PAO1 / 1C / PRS 101 / LMG 12228) GN=cbpD PE=1 SV=1	1	1	1	1	3.6	3.6	3.6	41.916	389	389	0	10.775	4525400	3				99	58	TRUE	63	111;112	274;275;276	275
sp|Q9I5Z0|METK_PSEAE	sp|Q9I5Z0|METK_PSEAE	1	1	1	>sp|Q9I5Z0|METK_PSEAE S-adenosylmethionine synthase OS=Pseudomonas aeruginosa (strain ATCC 15692 / PAO1 / 1C / PRS 101 / LMG 12228) GN=metK PE=3 SV=1	1	1	1	1	2.8	2.8	2.8	42.709	396	396	0	7.4468	0	1				100	216	TRUE	240	385	759	759	41	256
sp|Q9I617|BIOF_PSEAE	sp|Q9I617|BIOF_PSEAE	1	1	1	>sp|Q9I617|BIOF_PSEAE 8-amino-7-oxononanoate synthase OS=Pseudomonas aeruginosa (strain ATCC 15692 / PAO1 / 1C / PRS 101 / LMG 12228) GN=bioF PE=3 SV=1	1	1	1	1	5	5	5	42.237	401	401	0	5.9398	5169600	0				101	61	TRUE	66	115	279	279
sp|Q9I685|SAHH_PSEAE	sp|Q9I685|SAHH_PSEAE	7	7	7	>sp|Q9I685|SAHH_PSEAE Adenosylhomocysteinase OS=Pseudomonas aeruginosa (strain ATCC 15692 / PAO1 / 1C / PRS 101 / LMG 12228) GN=ahcY PE=3 SV=1	1	7	7	7	19.6	19.6	19.6	51.399	469	469	0	47.577	30066000	23				102	162;211;227;303;348;470;492	True;True;True;True;True;True;True	180;234;251;252;329;383;515;538	286;287;373;374;398;399;400;547;667;668;872;873;913;914	562;563;564;736;737;738;777;778;779;780;781;782;783;1118;1388;1389;1867;1868;1869;1870;1871;1946;1947	562;736;778;1118;1389;1868;1946	42	387
sp|Q9I6M4|DAVT_PSEAE	sp|Q9I6M4|DAVT_PSEAE	2	2	2	>sp|Q9I6M4|DAVT_PSEAE 5-aminovalerate aminotransferase DavT OS=Pseudomonas aeruginosa (strain ATCC 15692 / PAO1 / 1C / PRS 101 / LMG 12228) GN=davT PE=1 SV=1	1	2	2	2	6.3	6.3	6.3	45.22	426	426	0	11.932	4300300	2				103	23;393	True;True	24;432	42;739;740	120;1562;1563	120;1563
sp|Q9I6M5|DAVD_PSEAE	sp|Q9I6M5|DAVD_PSEAE	2	2	2	>sp|Q9I6M5|DAVD_PSEAE Glutarate-semialdehyde dehydrogenase DavD OS=Pseudomonas aeruginosa (strain ATCC 15692 / PAO1 / 1C / PRS 101 / LMG 12228) GN=davD PE=1 SV=1	1	2	2	2	7.2	7.2	7.2	51.622	483	483	0	25.901	9484500	5				104	288;466	True;True	314;510	524;863;864	1074;1850;1851;1852;1853	1074;1850
sp|Q9I747|HCP1_PSEAE	sp|Q9I747|HCP1_PSEAE	2	2	2	>sp|Q9I747|HCP1_PSEAE Protein hcp1 OS=Pseudomonas aeruginosa (strain ATCC 15692 / PAO1 / 1C / PRS 101 / LMG 12228) GN=hcp1 PE=1 SV=1	1	2	2	2	16.7	16.7	16.7	17.414	162	162	0	16.643	6010800	4				105	133;469	True;True	149;514	242;870;871	498;499;1865;1866	498;1866
sp|Q9I7B8|SYGB_PSEAE	sp|Q9I7B8|SYGB_PSEAE	1	1	1	>sp|Q9I7B8|SYGB_PSEAE Glycine--tRNA ligase beta subunit OS=Pseudomonas aeruginosa (strain ATCC 15692 / PAO1 / 1C / PRS 101 / LMG 12228) GN=glyS PE=3 SV=1	1	1	1	1	2.2	2.2	2.2	73.973	684	684	0	5.964	225620	2				106	1	TRUE	1	1;2	1;2	1
sp|Q9I7C4|DPO3B_PSEAE	sp|Q9I7C4|DPO3B_PSEAE	1	1	1	>sp|Q9I7C4|DPO3B_PSEAE DNA polymerase III subunit beta OS=Pseudomonas aeruginosa (strain ATCC 15692 / PAO1 / 1C / PRS 101 / LMG 12228) GN=dnaN PE=3 SV=1	1	1	1	1	4.4	4.4	4.4	40.694	367	367	0	6.6081	894850	1				107	106	TRUE	118	202	445	445
sp|Q9S508|PHZB2_PSEAE	sp|Q9S508|PHZB2_PSEAE	5	5	2	>sp|Q9S508|PHZB2_PSEAE Phenazine biosynthesis protein PhzB 2 OS=Pseudomonas aeruginosa (strain ATCC 15692 / PAO1 / 1C / PRS 101 / LMG 12228) GN=phzB2 PE=1 SV=1	1	5	5	2	38.9	38.9	25.9	19.027	162	162	0	35.524	26899000	12				108	42;43;113;220;313	True;True;True;True;True	44;45;125;126;244;341;342	75;76;77;211;212;390;564;565	188;189;190;191;192;456;457;458;764;1150;1151;1152	191;192;457;764;1150	4;43	1;139
sp|Q9X2T1|THIO_PSEAE	sp|Q9X2T1|THIO_PSEAE	1	1	1	>sp|Q9X2T1|THIO_PSEAE Thioredoxin OS=Pseudomonas aeruginosa (strain ATCC 15692 / PAO1 / 1C / PRS 101 / LMG 12228) GN=trxA PE=3 SV=1	1	1	1	1	11.1	11.1	11.1	11.87	108	108	0	6.7596	758750	2				109	287	TRUE	313	523	1072;1073	1072
tr|Q9HTD1|Q9HTD1_PSEAE	tr|Q9HTD1|Q9HTD1_PSEAE	26	26	26	>tr|Q9HTD1|Q9HTD1_PSEAE Probable transcarboxylase subunit OS=Pseudomonas aeruginosa (strain ATCC 15692 / PAO1 / 1C / PRS 101 / LMG 12228) GN=PA5435 PE=4 SV=1	1	26	26	26	52.1	52.1	52.1	66.095	607	607	0	243.9	600030000	188				110	7;9;45;51;52;82;96;104;144;160;182;185;186;200;206;246;311;347;370;371;405;467;476;500;501;504	True;True;True;True;True;True;True;True;True;True;True;True;True;True;True;True;True;True;True;True;True;True;True;True;True;True	7;9;48;49;56;57;91;107;108;116;162;178;201;204;205;206;220;221;222;228;229;271;338;339;382;405;406;407;408;444;511;521;522;546;547;550	12;13;16;17;80;81;82;83;84;85;100;101;102;103;153;181;182;183;184;196;197;198;199;262;263;284;324;325;330;331;332;333;353;354;355;356;357;358;365;366;367;368;451;452;559;560;561;562;663;664;665;666;697;698;699;700;701;702;765;766;865;884;885;886;887;937;938;939;940;943;944;945	42;43;44;45;46;47;50;51;52;53;54;55;56;57;58;59;60;61;195;196;197;198;199;200;201;202;246;247;248;249;250;251;252;347;392;393;394;395;396;397;398;399;400;401;428;429;430;431;432;433;434;435;436;437;438;439;440;441;531;532;533;559;560;623;624;625;626;627;628;629;639;640;641;642;643;644;645;646;647;648;649;650;651;652;653;654;655;656;657;658;659;660;698;699;700;701;702;703;704;705;706;707;708;723;7…	46;58;195;247;250;347;392;433;533;560;623;640;657;707;723;917;1140;1387;1441;1443;1656;1854;1901;2014;2016;2025	44;45;46;47;48;49;50;51;52;53	125;169;172;182;239;251;274;306;323;435
tr|Q9HTD9|Q9HTD9_PSEAE	tr|Q9HTD9|Q9HTD9_PSEAE	2	2	2	>tr|Q9HTD9|Q9HTD9_PSEAE Alcohol dehydrogenase OS=Pseudomonas aeruginosa (strain ATCC 15692 / PAO1 / 1C / PRS 101 / LMG 12228) GN=adhA PE=1 SV=1	1	2	2	2	7.9	7.9	7.9	35.911	342	342	0	12.492	2303700	1				111	204;350	True;True	226;385	363;670	721;1392	721;1392
tr|Q9HTP2|Q9HTP2_PSEAE	tr|Q9HTP2|Q9HTP2_PSEAE	3	3	3	>tr|Q9HTP2|Q9HTP2_PSEAE Probable aldehyde dehydrogenase OS=Pseudomonas aeruginosa (strain ATCC 15692 / PAO1 / 1C / PRS 101 / LMG 12228) GN=PA5312 PE=3 SV=1	1	3	3	3	8	8	8	53.143	497	497	0	17.518	5172400	3				112	145;197;269	True;True;True	163;217;294	264;347;348;491	534;689;690;1000;1001	534;690;1000
tr|Q9HU11|Q9HU11_PSEAE	tr|Q9HU11|Q9HU11_PSEAE	1	1	1	>tr|Q9HU11|Q9HU11_PSEAE Uncharacterized protein OS=Pseudomonas aeruginosa (strain ATCC 15692 / PAO1 / 1C / PRS 101 / LMG 12228) GN=PA5178 PE=4 SV=1	1	1	1	1	11.7	11.7	11.7	15.46	145	145	0	5.6641	859260	0				113	223	TRUE	247	393	767	767
tr|Q9HUD3|Q9HUD3_PSEAE	tr|Q9HUD3|Q9HUD3_PSEAE	1	1	1	>tr|Q9HUD3|Q9HUD3_PSEAE Malic enzyme OS=Pseudomonas aeruginosa (strain ATCC 15692 / PAO1 / 1C / PRS 101 / LMG 12228) GN=PA5046 PE=4 SV=1	1	1	1	1	3.3	3.3	3.3	45.428	422	422	0	6.1309	937170	1				114	3	TRUE	3	4	4	4
tr|Q9HVJ1|Q9HVJ1_PSEAE	tr|Q9HVJ1|Q9HVJ1_PSEAE	1	1	1	>tr|Q9HVJ1|Q9HVJ1_PSEAE Probable ATP-binding component of ABC transporter OS=Pseudomonas aeruginosa (strain ATCC 15692 / PAO1 / 1C / PRS 101 / LMG 12228) GN=PA4595 PE=4 SV=1	1	1	1	1	2.2	2.2	2.2	61.32	554	554	0	7.8726	2293300	2				115	460	TRUE	504	853	1829;1830	1829
tr|Q9HVY6|Q9HVY6_PSEAE	tr|Q9HVY6|Q9HVY6_PSEAE	1	1	1	>tr|Q9HVY6|Q9HVY6_PSEAE Probable cytochrome c1 OS=Pseudomonas aeruginosa (strain ATCC 15692 / PAO1 / 1C / PRS 101 / LMG 12228) GN=PA4429 PE=4 SV=1	1	1	1	1	5.8	5.8	5.8	28.993	260	260	0	7.7096	4073500	2				116	427	TRUE	467	799;800	1702;1703	1703
tr|Q9HW49|Q9HW49_PSEAE	tr|Q9HW49|Q9HW49_PSEAE	7	7	7	>tr|Q9HW49|Q9HW49_PSEAE Uncharacterized protein OS=Pseudomonas aeruginosa (strain ATCC 15692 / PAO1 / 1C / PRS 101 / LMG 12228) GN=PA4352 PE=3 SV=1	1	7	7	7	40.9	40.9	40.9	30.972	286	286	0	59.081	35517000	37				117	75;225;250;442;446;447;461	True;True;True;True;True;True;True	83;84;249;275;483;488;489;490;491;505	141;142;143;144;395;458;459;821;828;829;830;831;832;833;854	321;322;323;324;325;326;327;328;329;330;331;332;769;923;924;925;1771;1779;1780;1781;1782;1783;1784;1785;1786;1787;1788;1789;1790;1791;1792;1793;1794;1795;1796;1797;1831	324;769;924;1771;1792;1795;1831	54;55;56	100;158;237
tr|Q9HWQ0|Q9HWQ0_PSEAE	tr|Q9HWQ0|Q9HWQ0_PSEAE	2	2	2	>tr|Q9HWQ0|Q9HWQ0_PSEAE Probable iron-sulfur protein OS=Pseudomonas aeruginosa (strain ATCC 15692 / PAO1 / 1C / PRS 101 / LMG 12228) GN=PA4131 PE=4 SV=1	1	2	2	2	4.7	4.7	4.7	63.991	573	573	0	13.554	1692700	3				118	21;231	True;True	22;256	40;426	118;873;874	118;874
tr|Q9HWV0|Q9HWV0_PSEAE	tr|Q9HWV0|Q9HWV0_PSEAE	1	1	1	>tr|Q9HWV0|Q9HWV0_PSEAE Probable nonribosomal peptide synthetase OS=Pseudomonas aeruginosa (strain ATCC 15692 / PAO1 / 1C / PRS 101 / LMG 12228) GN=PA4078 PE=4 SV=1	1	1	1	1	1.3	1.3	1.3	110.35	991	991	0	6.1731	1204500	1				119	377	TRUE	414	711	1459	1459
tr|Q9I2C4|Q9I2C4_PSEAE;tr|Q9HX05|Q9HX05_PSEAE	tr|Q9I2C4|Q9I2C4_PSEAE;tr|Q9HX05|Q9HX05_PSEAE	2;2	2;2	2;2	>tr|Q9I2C4|Q9I2C4_PSEAE NAD+ dependent aldehyde dehydrogenase ExaC OS=Pseudomonas aeruginosa (strain ATCC 15692 / PAO1 / 1C / PRS 101 / LMG 12228) GN=exaC PE=3 SV=1;>tr|Q9HX05|Q9HX05_PSEAE Probable aldehyde dehydrogenase OS=Pseudomonas aeruginosa (strain A	2	2	2	2	6.1	6.1	6.1	54.892	506	506;506	0	19.633	6083800	3				120	258;503	True;True	283;549	470;471;942	938;939;2020	939;2020
tr|Q9HXM5|Q9HXM5_PSEAE	tr|Q9HXM5|Q9HXM5_PSEAE	1	1	1	>tr|Q9HXM5|Q9HXM5_PSEAE Inosine-5-monophosphate dehydrogenase OS=Pseudomonas aeruginosa (strain ATCC 15692 / PAO1 / 1C / PRS 101 / LMG 12228) GN=guaB PE=1 SV=1	1	1	1	1	3.1	3.1	3.1	51.707	489	489	0	8.7404	269060	1				121	4	TRUE	4	5	5	5	57;58	444;455
tr|Q9HXU8|Q9HXU8_PSEAE	tr|Q9HXU8|Q9HXU8_PSEAE	1	1	1	>tr|Q9HXU8|Q9HXU8_PSEAE Lipotoxon F, LptF OS=Pseudomonas aeruginosa (strain ATCC 15692 / PAO1 / 1C / PRS 101 / LMG 12228) GN=lptF PE=3 SV=1	1	1	1	1	5	5	5	28.514	261	261	0	16.434	890370	3				122	319	TRUE	352	585;586	1200;1201;1202	1202
tr|Q9HY81|Q9HY81_PSEAE	tr|Q9HY81|Q9HY81_PSEAE	6	6	6	>tr|Q9HY81|Q9HY81_PSEAE Probable peroxidase OS=Pseudomonas aeruginosa (strain ATCC 15692 / PAO1 / 1C / PRS 101 / LMG 12228) GN=PA3529 PE=1 SV=1	1	6	6	6	35.5	35.5	35.5	21.822	200	200	0	47.485	52506000	20				123	80;154;333;339;386;505	True;True;True;True;True;True	89;172;366;374;424;551	150;151;276;638;652;726;727;946;947	338;339;340;341;342;343;344;345;547;1332;1356;1357;1512;1513;1514;1515;1516;1517;2029;2030	342;547;1332;1357;1516;2030
tr|Q9HYT5|Q9HYT5_PSEAE	tr|Q9HYT5|Q9HYT5_PSEAE	6	6	6	>tr|Q9HYT5|Q9HYT5_PSEAE Uncharacterized protein OS=Pseudomonas aeruginosa (strain ATCC 15692 / PAO1 / 1C / PRS 101 / LMG 12228) GN=PA3309 PE=3 SV=1	1	6	6	6	48.3	48.3	48.3	16.496	151	151	0	53.021	105860000	28				124	194;226;283;435;440;453	True;True;True;True;True;True	214;250;308;309;476;481;497	343;344;396;397;515;516;517;518;810;819;841;842	681;682;683;684;685;770;771;772;773;774;775;776;1059;1060;1061;1062;1063;1064;1065;1066;1720;1721;1769;1807;1808;1809;1810;1811	683;774;1061;1721;1769;1810	59	129
tr|Q9HYZ6|Q9HYZ6_PSEAE	tr|Q9HYZ6|Q9HYZ6_PSEAE	2	2	2	>tr|Q9HYZ6|Q9HYZ6_PSEAE Site-determining protein OS=Pseudomonas aeruginosa (strain ATCC 15692 / PAO1 / 1C / PRS 101 / LMG 12228) GN=minD PE=3 SV=1	1	2	2	2	10	10	10	29.635	271	271	0	10.881	4617500	1				125	279;421	True;True	304;461	507;508;791	1043;1044;1691	1044;1691
tr|Q9HZK4|Q9HZK4_PSEAE	tr|Q9HZK4|Q9HZK4_PSEAE	3	3	3	>tr|Q9HZK4|Q9HZK4_PSEAE Glyceraldehyde-3-phosphate dehydrogenase OS=Pseudomonas aeruginosa (strain ATCC 15692 / PAO1 / 1C / PRS 101 / LMG 12228) GN=PA3001 PE=3 SV=1	1	3	3	3	8	8	8	50.111	461	461	0	21.982	4591200	3				126	111;263;366	True;True;True	123;288;401	209;478;693	454;950;1432	454;950;1432	60	325
tr|Q9I028|Q9I028_PSEAE	tr|Q9I028|Q9I028_PSEAE	3	3	3	>tr|Q9I028|Q9I028_PSEAE Probable acyl-CoA dehydrogenase OS=Pseudomonas aeruginosa (strain ATCC 15692 / PAO1 / 1C / PRS 101 / LMG 12228) GN=PA2815 PE=4 SV=1	1	3	3	3	9.1	9.1	9.1	88.762	815	815	0	18.226	12104000	3				127	128;224;474	True;True;True	144;248;519	236;394;880;881	492;768;1890;1891;1892	492;768;1891
tr|Q9I056|Q9I056_PSEAE	tr|Q9I056|Q9I056_PSEAE	1	1	1	>tr|Q9I056|Q9I056_PSEAE Carboxypeptidase G2 OS=Pseudomonas aeruginosa (strain ATCC 15692 / PAO1 / 1C / PRS 101 / LMG 12228) GN=cpg2 PE=4 SV=1	1	1	1	1	3.4	3.4	3.4	44.007	412	412	0	5.9968	483370	1				128	307	TRUE	334	554	1126	1126
tr|Q9I0L5|Q9I0L5_PSEAE	tr|Q9I0L5|Q9I0L5_PSEAE	11	11	11	>tr|Q9I0L5|Q9I0L5_PSEAE Isocitrate dehydrogenase [NADP] OS=Pseudomonas aeruginosa (strain ATCC 15692 / PAO1 / 1C / PRS 101 / LMG 12228) GN=icd PE=3 SV=1	1	11	11	11	32.5	32.5	32.5	45.577	418	418	0	87.117	51445000	28				129	41;67;102;147;180;232;236;335;425;468;490	True;True;True;True;True;True;True;True;True;True;True	43;73;114;165;198;257;261;369;370;465;512;513;536	74;126;194;267;319;320;427;434;643;644;645;646;797;866;867;868;869;909;910	187;299;300;301;426;538;615;616;617;618;875;885;1339;1340;1341;1342;1343;1344;1700;1857;1858;1859;1860;1861;1862;1863;1864;1942;1943	187;301;426;538;617;875;885;1339;1700;1863;1942	61;62;63;64	21;47;185;364
tr|Q9I0T1|Q9I0T1_PSEAE	tr|Q9I0T1|Q9I0T1_PSEAE	4	4	4	>tr|Q9I0T1|Q9I0T1_PSEAE Probable acyl-CoA thiolase OS=Pseudomonas aeruginosa (strain ATCC 15692 / PAO1 / 1C / PRS 101 / LMG 12228) GN=PA2553 PE=3 SV=1	1	4	4	4	13.9	13.9	13.9	41.4	396	396	0	37.193	7431500	6				130	101;109;240;414	True;True;True;True	113;121;265;454	192;193;206;439;780	424;425;449;450;890;1678	425;449;890;1678
tr|Q9I0Z9|Q9I0Z9_PSEAE	tr|Q9I0Z9|Q9I0Z9_PSEAE	2	2	2	>tr|Q9I0Z9|Q9I0Z9_PSEAE Uncharacterized protein OS=Pseudomonas aeruginosa (strain ATCC 15692 / PAO1 / 1C / PRS 101 / LMG 12228) GN=PA2483 PE=4 SV=1	1	2	2	2	15	15	15	36.102	333	333	0	11.253	1519300	2				131	387;418	True;True	425;458	728;787	1518;1519;1686	1519;1686
tr|Q9I1E7|Q9I1E7_PSEAE	tr|Q9I1E7|Q9I1E7_PSEAE	4	4	4	>tr|Q9I1E7|Q9I1E7_PSEAE Alkyl hydroperoxide reductase AhpD OS=Pseudomonas aeruginosa (strain ATCC 15692 / PAO1 / 1C / PRS 101 / LMG 12228) GN=PA2331 PE=3 SV=1	1	4	4	4	22.6	22.6	22.6	19.904	186	186	0	25.352	10742000	3				132	157;291;412;497	True;True;True;True	175;317;452;543	280;528;776;777;934	552;1079;1674;1675;2010	552;1079;1675;2010
tr|Q9I1E8|Q9I1E8_PSEAE	tr|Q9I1E8|Q9I1E8_PSEAE	2	2	2	>tr|Q9I1E8|Q9I1E8_PSEAE Uncharacterized protein OS=Pseudomonas aeruginosa (strain ATCC 15692 / PAO1 / 1C / PRS 101 / LMG 12228) GN=PA2330 PE=4 SV=1	1	2	2	2	10.4	10.4	10.4	37.68	355	355	0	16.725	2314800	1				133	129;208	True;True	145;231	237;370	493;733	493;733
tr|Q9I1H5|Q9I1H5_PSEAE	tr|Q9I1H5|Q9I1H5_PSEAE	6	6	6	>tr|Q9I1H5|Q9I1H5_PSEAE Chitinase OS=Pseudomonas aeruginosa (strain ATCC 15692 / PAO1 / 1C / PRS 101 / LMG 12228) GN=chiC PE=3 SV=1	1	6	6	6	19.9	19.9	19.9	53.042	483	483	0	46.055	29135000	16				134	173;199;251;345;437;494	True;True;True;True;True;True	191;219;276;380;478;540	304;305;350;351;352;460;461;660;813;814;917	589;590;693;694;695;696;697;926;927;928;929;1369;1754;1755;1756;1757;1950	590;696;927;1369;1756;1950
tr|Q9I1W0|Q9I1W0_PSEAE	tr|Q9I1W0|Q9I1W0_PSEAE	1	1	1	>tr|Q9I1W0|Q9I1W0_PSEAE Cardiolipin synthase B OS=Pseudomonas aeruginosa (strain ATCC 15692 / PAO1 / 1C / PRS 101 / LMG 12228) GN=clsB PE=3 SV=1	1	1	1	1	1.7	1.7	1.7	46.545	401	401	0	5.6183	2010300	0				135	245	TRUE	270	450	915	915
tr|Q9I246|Q9I246_PSEAE	tr|Q9I246|Q9I246_PSEAE	9	9	9	>tr|Q9I246|Q9I246_PSEAE Probable carbamoyl transferase OS=Pseudomonas aeruginosa (strain ATCC 15692 / PAO1 / 1C / PRS 101 / LMG 12228) GN=PA2069 PE=4 SV=1	1	9	9	9	20.9	20.9	20.9	63.382	574	574	0	64.605	23591000	16				136	87;131;193;195;234;342;365;376;380	True;True;True;True;True;True;True;True;True	96;147;213;215;259;377;400;413;417	161;240;342;345;430;431;656;657;692;709;710;715	359;496;680;686;878;879;880;881;1361;1362;1363;1364;1365;1366;1431;1457;1458;1466;1467	359;496;680;686;879;1365;1431;1458;1466
tr|Q9I299|Q9I299_PSEAE	tr|Q9I299|Q9I299_PSEAE	8	8	8	>tr|Q9I299|Q9I299_PSEAE Methylcrotonyl-CoA carboxylase, alpha-subunit (Biotin-containing) OS=Pseudomonas aeruginosa (strain ATCC 15692 / PAO1 / 1C / PRS 101 / LMG 12228) GN=liuD PE=1 SV=1	1	8	8	8	15.7	15.7	15.7	71.282	655	655	0	57.481	13846000	13				137	34;103;196;221;257;278;410;484	True;True;True;True;True;True;True;True	36;115;216;245;282;303;450;530	60;61;195;346;391;469;506;773;900	160;161;162;427;687;688;765;937;1041;1042;1667;1925;1926	160;427;687;765;937;1042;1667;1926	65	413
tr|Q9I2A6|Q9I2A6_PSEAE	tr|Q9I2A6|Q9I2A6_PSEAE	1	1	1	>tr|Q9I2A6|Q9I2A6_PSEAE 3-hydroxybutyrate dehydrogenase OS=Pseudomonas aeruginosa (strain ATCC 15692 / PAO1 / 1C / PRS 101 / LMG 12228) GN=bdhA PE=3 SV=1	1	1	1	1	6.2	6.2	6.2	26.727	256	256	0	5.851	2106900	1				138	238	TRUE	263	436	887	887
tr|Q9I2A9|Q9I2A9_PSEAE	tr|Q9I2A9|Q9I2A9_PSEAE	1	1	1	>tr|Q9I2A9|Q9I2A9_PSEAE DhcB, dehydrocarnitine CoA transferase, subunit B OS=Pseudomonas aeruginosa (strain ATCC 15692 / PAO1 / 1C / PRS 101 / LMG 12228) GN=dhcB PE=4 SV=1	1	1	1	1	5.5	5.5	5.5	23.187	218	218	0	5.6943	670810	0				139	276	TRUE	301	503	1036	1036	66	216
tr|Q9I2R2|Q9I2R2_PSEAE	tr|Q9I2R2|Q9I2R2_PSEAE	2	2	2	>tr|Q9I2R2|Q9I2R2_PSEAE Probable oxidoreductase OS=Pseudomonas aeruginosa (strain ATCC 15692 / PAO1 / 1C / PRS 101 / LMG 12228) GN=PA1833 PE=4 SV=1	1	2	2	2	8.5	8.5	8.5	34.551	330	330	0	16.156	1146400	2				140	188;271	True;True	208;296	336;493	664;665;1003	664;1003
tr|Q9I2V3|Q9I2V3_PSEAE	tr|Q9I2V3|Q9I2V3_PSEAE	3	3	3	>tr|Q9I2V3|Q9I2V3_PSEAE Uncharacterized protein OS=Pseudomonas aeruginosa (strain ATCC 15692 / PAO1 / 1C / PRS 101 / LMG 12228) GN=PA1789 PE=1 SV=1	1	3	3	3	17.8	17.8	17.8	31.273	287	287	0	17.216	3773600	4				141	218;379;382	True;True;True	242;416;419	387;714;718	761;1464;1465;1470	761;1465;1470
tr|Q9I2W9|Q9I2W9_PSEAE	tr|Q9I2W9|Q9I2W9_PSEAE	3	3	3	>tr|Q9I2W9|Q9I2W9_PSEAE Phosphoenolpyruvate synthase OS=Pseudomonas aeruginosa (strain ATCC 15692 / PAO1 / 1C / PRS 101 / LMG 12228) GN=ppsA PE=3 SV=1	1	3	3	3	5.3	5.3	5.3	85.816	791	791	0	23.707	3671700	2				142	14;37;137	True;True;True	14;39;154	26;66;250	78;171;512	78;171;512
tr|Q9I3B2|Q9I3B2_PSEAE	tr|Q9I3B2|Q9I3B2_PSEAE	2	2	2	>tr|Q9I3B2|Q9I3B2_PSEAE Beta-ketoacyl-ACP synthase I OS=Pseudomonas aeruginosa (strain ATCC 15692 / PAO1 / 1C / PRS 101 / LMG 12228) GN=fabB PE=3 SV=1	1	2	2	2	6.2	6.2	6.2	42.806	405	405	0	12.168	3323300	3				143	132;149	True;True	148;167	241;270;271	497;541;542	497;542	67	42
tr|Q9I3D3|Q9I3D3_PSEAE	tr|Q9I3D3|Q9I3D3_PSEAE	3	3	3	>tr|Q9I3D3|Q9I3D3_PSEAE 2-oxoglutarate dehydrogenase (E1 subunit) OS=Pseudomonas aeruginosa (strain ATCC 15692 / PAO1 / 1C / PRS 101 / LMG 12228) GN=sucA PE=4 SV=1	1	3	3	3	4.7	4.7	4.7	105.88	943	943	0	24.612	5339900	5				144	86;289;290	True;True;True	95;315;316	160;525;526;527	358;1075;1076;1077;1078	358;1075;1076
tr|Q9I3D4|Q9I3D4_PSEAE	tr|Q9I3D4|Q9I3D4_PSEAE	3	3	3	>tr|Q9I3D4|Q9I3D4_PSEAE Succinate dehydrogenase (B subunit) OS=Pseudomonas aeruginosa (strain ATCC 15692 / PAO1 / 1C / PRS 101 / LMG 12228) GN=sdhB PE=4 SV=1	1	3	3	3	17	17	17	26.155	235	235	0	22.037	4347900	4				145	143;254;456	True;True;True	161;279;500	261;466;845	529;530;934;1815	530;934;1815
tr|Q9I3D5|Q9I3D5_PSEAE	tr|Q9I3D5|Q9I3D5_PSEAE	4	4	4	>tr|Q9I3D5|Q9I3D5_PSEAE Succinate dehydrogenase flavoprotein subunit OS=Pseudomonas aeruginosa (strain ATCC 15692 / PAO1 / 1C / PRS 101 / LMG 12228) GN=sdhA PE=3 SV=1	1	4	4	4	8	8	8	63.531	590	590	0	40.417	20389000	25				146	169;202;203;267	True;True;True;True	187;224;225;292	298;299;360;361;362;486;487;488;489	581;582;710;711;712;713;714;715;716;717;718;719;720;986;987;988;989;990;991;992;993;994;995;996;997	581;714;717;989
tr|Q9I3G0|Q9I3G0_PSEAE	tr|Q9I3G0|Q9I3G0_PSEAE	1	1	1	>tr|Q9I3G0|Q9I3G0_PSEAE Cytochrome c oxidase, cbb3-type, CcoN subunit OS=Pseudomonas aeruginosa (strain ATCC 15692 / PAO1 / 1C / PRS 101 / LMG 12228) GN=ccoN2 PE=3 SV=1	1	1	1	1	3.6	3.6	3.6	53.09	475	475	0	5.6775	944490	0				147	424	TRUE	464	796	1699	1699
tr|Q9I3G1|Q9I3G1_PSEAE	tr|Q9I3G1|Q9I3G1_PSEAE	1	1	1	>tr|Q9I3G1|Q9I3G1_PSEAE Cytochrome c oxidase, cbb3-type, CcoO subunit OS=Pseudomonas aeruginosa (strain ATCC 15692 / PAO1 / 1C / PRS 101 / LMG 12228) GN=ccoO2 PE=4 SV=1	1	1	1	1	8.9	8.9	8.9	22.778	202	202	0	14.465	293650	1				148	402	TRUE	441	758	1626	1626
tr|Q9I3G6|Q9I3G6_PSEAE	tr|Q9I3G6|Q9I3G6_PSEAE	1	1	1	>tr|Q9I3G6|Q9I3G6_PSEAE Probable ferredoxin OS=Pseudomonas aeruginosa (strain ATCC 15692 / PAO1 / 1C / PRS 101 / LMG 12228) GN=PA1551 PE=4 SV=1	1	1	1	1	2.1	2.1	2.1	53.62	471	471	0	6.3258	1118400	2				149	176	TRUE	194	312;313	607;608	608
tr|Q9I402|Q9I402_PSEAE	tr|Q9I402|Q9I402_PSEAE	1	1	1	>tr|Q9I402|Q9I402_PSEAE Probable binding protein component of ABC transporter OS=Pseudomonas aeruginosa (strain ATCC 15692 / PAO1 / 1C / PRS 101 / LMG 12228) GN=PA1342 PE=4 SV=1	1	1	1	1	4.3	4.3	4.3	33.054	302	302	0	7.789	389210	1				150	29	TRUE	31	52	147	147
tr|Q9I585|Q9I585_PSEAE	tr|Q9I585|Q9I585_PSEAE	1	1	1	>tr|Q9I585|Q9I585_PSEAE Uncharacterized protein OS=Pseudomonas aeruginosa (strain ATCC 15692 / PAO1 / 1C / PRS 101 / LMG 12228) GN=PA0856 PE=1 SV=1	1	1	1	1	6.6	6.6	6.6	19.998	182	182	0	9.5895	171790	1				151	298	TRUE	324	539	1100	1100
tr|Q9I5E3|Q9I5E3_PSEAE	tr|Q9I5E3|Q9I5E3_PSEAE	1	1	1	>tr|Q9I5E3|Q9I5E3_PSEAE Citrate synthase OS=Pseudomonas aeruginosa (strain ATCC 15692 / PAO1 / 1C / PRS 101 / LMG 12228) GN=prpC PE=3 SV=1	1	1	1	1	3.7	3.7	3.7	41.689	375	375	0	8.097	3210400	3				152	214	TRUE	237	378;379	742;743;744	743
tr|Q9I5P0|Q9I5P0_PSEAE	tr|Q9I5P0|Q9I5P0_PSEAE	1	1	1	>tr|Q9I5P0|Q9I5P0_PSEAE Probable type II secretion system protein OS=Pseudomonas aeruginosa (strain ATCC 15692 / PAO1 / 1C / PRS 101 / LMG 12228) GN=PA0685 PE=3 SV=1	1	1	1	1	1	1	1	83.85	803	803	0	5.5783	4802100	0				153	426	TRUE	466	798	1701	1701
tr|Q9I5U9|Q9I5U9_PSEAE	tr|Q9I5U9|Q9I5U9_PSEAE	8	8	8	>tr|Q9I5U9|Q9I5U9_PSEAE Uncharacterized protein OS=Pseudomonas aeruginosa (strain ATCC 15692 / PAO1 / 1C / PRS 101 / LMG 12228) GN=PA0588 PE=4 SV=1	1	8	8	8	14.2	14.2	14.2	73.722	640	640	0	66.137	37049000	21				154	97;277;281;284;308;326;336;488	True;True;True;True;True;True;True;True	109;302;306;310;335;359;371;534	185;186;504;505;510;511;519;520;555;556;625;626;647;905;906	402;403;404;405;1037;1038;1039;1040;1046;1047;1067;1068;1127;1128;1314;1315;1345;1935;1936;1937;1938	402;1039;1046;1067;1127;1314;1345;1938	68	412
tr|Q9I659|Q9I659_PSEAE;sp|Q9HVN5|CLPB_PSEAE	tr|Q9I659|Q9I659_PSEAE	5;1	5;1	5;1	>tr|Q9I659|Q9I659_PSEAE Probable ClpA/B protease ATP binding subunit OS=Pseudomonas aeruginosa (strain ATCC 15692 / PAO1 / 1C / PRS 101 / LMG 12228) GN=PA0459 PE=4 SV=1	2	5	5	5	7.4	7.4	7.4	94.174	850	850;854	0	29.923	683720	6				155	151;322;398;438;502	True;True;True;True;True	169;355;437;479;548	273;618;752;815;816;941	544;1300;1617;1758;1759;2019	544;1300;1617;1759;2019
tr|Q9I689|Q9I689_PSEAE	tr|Q9I689|Q9I689_PSEAE	1	1	1	>tr|Q9I689|Q9I689_PSEAE ATP-dependent RNA helicase RhlE OS=Pseudomonas aeruginosa (strain ATCC 15692 / PAO1 / 1C / PRS 101 / LMG 12228) GN=rhlE PE=3 SV=1	1	1	1	1	2.5	2.5	2.5	70.111	639	639	0	11.222	162850	2				156	72	TRUE	80	137	315;316	315
tr|Q9I6H5|Q9I6H5_PSEAE	tr|Q9I6H5|Q9I6H5_PSEAE	3	3	3	>tr|Q9I6H5|Q9I6H5_PSEAE D-3-phosphoglycerate dehydrogenase OS=Pseudomonas aeruginosa (strain ATCC 15692 / PAO1 / 1C / PRS 101 / LMG 12228) GN=serA PE=3 SV=1	1	3	3	3	9.5	9.5	9.5	44.216	409	409	0	20.091	2631800	3				157	2;170;390	True;True;True	2;188;428	3;300;733	3;583;1556	3;583;1556
tr|Q9I6J2|Q9I6J2_PSEAE	tr|Q9I6J2|Q9I6J2_PSEAE	1	1	1	>tr|Q9I6J2|Q9I6J2_PSEAE Putrescine aminotransferase OS=Pseudomonas aeruginosa (strain ATCC 15692 / PAO1 / 1C / PRS 101 / LMG 12228) GN=spuC PE=3 SV=1	1	1	1	1	3.1	3.1	3.1	50.452	456	456	0	5.5856	2762400	0				158	491	TRUE	537	911;912	1944;1945	1945
tr|Q9I6Z3|Q9I6Z3_PSEAE	tr|Q9I6Z3|Q9I6Z3_PSEAE	7	7	7	>tr|Q9I6Z3|Q9I6Z3_PSEAE Alkyl hydroperoxide reductase subunit C OS=Pseudomonas aeruginosa (strain ATCC 15692 / PAO1 / 1C / PRS 101 / LMG 12228) GN=ahpC PE=4 SV=1	1	7	7	7	51.3	51.3	51.3	20.541	187	187	0	50.48	84255000	29				159	56;140;184;383;406;423;487	True;True;True;True;True;True;True	61;158;203;420;445;463;533	107;108;256;257;328;329;719;720;767;768;794;795;904	257;258;259;260;261;262;263;264;265;266;267;519;520;521;634;635;636;637;638;1471;1472;1473;1659;1660;1694;1695;1696;1697;1698;1934	265;520;636;1471;1659;1694;1934
tr|Q9I3B2|Q9I3B2_PSEAE	tr|Q9I3B2|Q9I3B2_PSEAE	2	2	2	>tr|Q9I3B2|Q9I3B2_PSEAE Beta-ketoacyl-ACP synthase I OS=Pseudomonas aeruginosa (strain ATCC 15692 / PAO1 / 1C / PRS 101 / LMG 12228) GN=fabB PE=3 SV=1	1	2	2	2	6.7	6.7	6.7	42.806	405	405	0	15.883	3586800	4				160	128;178	True;True	144;199	255;256;338	483;484;485;594	483;594
tr|Q9I3D3|Q9I3D3_PSEAE	tr|Q9I3D3|Q9I3D3_PSEAE	7	7	7	>tr|Q9I3D3|Q9I3D3_PSEAE 2-oxoglutarate dehydrogenase (E1 subunit) OS=Pseudomonas aeruginosa (strain ATCC 15692 / PAO1 / 1C / PRS 101 / LMG 12228) GN=sucA PE=4 SV=1	1	7	7	7	10.9	10.9	10.9	105.88	943	943	0	49.439	16346000	16				161	108;245;436;437;448;468;473	True;True;True;True;True;True;True	120;269;472;473;484;505;506;513	213;214;437;438;787;788;789;790;805;838;839;840;852	401;402;732;733;1376;1377;1378;1379;1380;1381;1382;1411;1469;1470;1471;1492	401;733;1376;1379;1411;1470;1492	76	592
tr|Q9I3D4|Q9I3D4_PSEAE	tr|Q9I3D4|Q9I3D4_PSEAE	4	4	4	>tr|Q9I3D4|Q9I3D4_PSEAE Succinate dehydrogenase (B subunit) OS=Pseudomonas aeruginosa (strain ATCC 15692 / PAO1 / 1C / PRS 101 / LMG 12228) GN=sdhB PE=4 SV=1	1	4	4	4	22.6	22.6	22.6	26.155	235	235	0	29.872	21290000	10				162	198;380;459;658	True;True;True;True	221;415;495;714	369;370;687;688;822;823;1221;1222	637;638;639;1197;1198;1199;1447;1448;2260;2261	637;1197;1448;2261
tr|Q9I3D5|Q9I3D5_PSEAE	tr|Q9I3D5|Q9I3D5_PSEAE	9	9	9	>tr|Q9I3D5|Q9I3D5_PSEAE Succinate dehydrogenase flavoprotein subunit OS=Pseudomonas aeruginosa (strain ATCC 15692 / PAO1 / 1C / PRS 101 / LMG 12228) GN=sdhA PE=3 SV=1	1	9	9	9	20.5	20.5	20.5	63.531	590	590	0	90.782	39186000	33				163	215;224;235;284;285;351;385;404;491	True;True;True;True;True;True;True;True;True	238;247;258;313;314;385;420;439;537	391;403;418;419;502;503;504;505;506;633;694;695;727;728;729;919	667;680;701;702;703;704;833;834;835;836;837;838;839;840;841;842;843;844;845;846;847;1115;1205;1206;1274;1275;1276;1277;1278;1279;1280;1281;1282;1665	667;680;701;835;837;1115;1205;1276;1665
tr|Q9I3G0|Q9I3G0_PSEAE	tr|Q9I3G0|Q9I3G0_PSEAE	2	2	2	>tr|Q9I3G0|Q9I3G0_PSEAE Cytochrome c oxidase, cbb3-type, CcoN subunit OS=Pseudomonas aeruginosa (strain ATCC 15692 / PAO1 / 1C / PRS 101 / LMG 12228) GN=ccoN2 PE=3 SV=1	1	2	2	2	6.1	6.1	6.1	53.09	475	475	0	13.256	1537800	3				164	572;614	True;True	625;667	1055;1056;1144	1929;1930;2117	1929;2117
tr|Q9I3G2|Q9I3G2_PSEAE	tr|Q9I3G2|Q9I3G2_PSEAE	2	2	2	>tr|Q9I3G2|Q9I3G2_PSEAE Cbb3-type cytochrome c oxidase subunit OS=Pseudomonas aeruginosa (strain ATCC 15692 / PAO1 / 1C / PRS 101 / LMG 12228) GN=ccoP2 PE=3 SV=1	1	2	2	2	9.4	9.4	9.4	33.812	308	308	0	10.909	2651000	0				165	588;710	True;True	641;769	1092;1319	2013;2429	2013;2429
tr|Q9I3G3|Q9I3G3_PSEAE	tr|Q9I3G3|Q9I3G3_PSEAE	1	1	1	>tr|Q9I3G3|Q9I3G3_PSEAE Cytochrome c oxidase, cbb3-type, CcoN subunit OS=Pseudomonas aeruginosa (strain ATCC 15692 / PAO1 / 1C / PRS 101 / LMG 12228) GN=ccoN1 PE=3 SV=1	1	1	1	1	2.9	2.9	2.9	53.108	475	475	0.0059172	5.7168	2252000	0				166	5	TRUE	5	8;9	9;10	9
tr|Q9I3G6|Q9I3G6_PSEAE	tr|Q9I3G6|Q9I3G6_PSEAE	3	3	3	>tr|Q9I3G6|Q9I3G6_PSEAE Probable ferredoxin OS=Pseudomonas aeruginosa (strain ATCC 15692 / PAO1 / 1C / PRS 101 / LMG 12228) GN=PA1551 PE=4 SV=1	1	3	3	3	7	7	7	53.62	471	471	0	20.453	4480600	4				167	242;244;288	True;True;True	265;268;317	432;433;436;509	727;728;731;850	728;731;850
tr|Q9I4I1|Q9I4I1_PSEAE	tr|Q9I4I1|Q9I4I1_PSEAE	1	1	1	>tr|Q9I4I1|Q9I4I1_PSEAE Ribonucleoside-diphosphate reductase OS=Pseudomonas aeruginosa (strain ATCC 15692 / PAO1 / 1C / PRS 101 / LMG 12228) GN=nrdA PE=3 SV=1	1	1	1	1	1.7	1.7	1.7	107.11	963	963	0.0057143	5.6337	330600	2				168	483	TRUE	529	883;884	1555;1556	1556
tr|Q9I5E3|Q9I5E3_PSEAE	tr|Q9I5E3|Q9I5E3_PSEAE	2	2	2	>tr|Q9I5E3|Q9I5E3_PSEAE Citrate synthase OS=Pseudomonas aeruginosa (strain ATCC 15692 / PAO1 / 1C / PRS 101 / LMG 12228) GN=prpC PE=3 SV=1	1	2	2	2	7.5	7.5	7.5	41.689	375	375	0	16.132	2854800	3				169	309;421	True;True	340;456	544;545;761	896;897;1334	896;1334
tr|Q9I5F6|Q9I5F6_PSEAE	tr|Q9I5F6|Q9I5F6_PSEAE	1	1	1	>tr|Q9I5F6|Q9I5F6_PSEAE Bifunctional protein PutA OS=Pseudomonas aeruginosa (strain ATCC 15692 / PAO1 / 1C / PRS 101 / LMG 12228) GN=putA PE=3 SV=1	1	1	1	1	1.4	1.4	1.4	115.63	1060	1060	0	10.902	1507300	2				170	458	TRUE	494	820;821	1445;1446	1446
tr|Q9I5U9|Q9I5U9_PSEAE	tr|Q9I5U9|Q9I5U9_PSEAE	13	13	13	>tr|Q9I5U9|Q9I5U9_PSEAE Uncharacterized protein OS=Pseudomonas aeruginosa (strain ATCC 15692 / PAO1 / 1C / PRS 101 / LMG 12228) GN=PA0588 PE=4 SV=1	1	13	13	13	25.9	25.9	25.9	73.722	640	640	0	111.95	51309000	35				171	66;127;420;424;426;431;467;470;475;489;505;589;705	True;True;True;True;True;True;True;True;True;True;True;True;True	72;73;142;143;455;459;461;467;504;509;515;516;535;553;642;764	129;130;252;253;254;758;759;760;765;766;769;770;779;780;836;837;845;846;854;855;856;916;917;942;943;1093;1311;1312	278;279;477;478;479;480;481;482;1331;1332;1333;1338;1339;1344;1345;1346;1365;1366;1367;1466;1467;1468;1476;1477;1494;1495;1496;1661;1662;1663;1698;1699;2014;2418;2419	279;477;1332;1339;1345;1366;1466;1476;1495;1661;1699;2014;2418	77;78;79	260;359;412
tr|Q9I5Y8|Q9I5Y8_PSEAE	tr|Q9I5Y8|Q9I5Y8_PSEAE	2	2	2	>tr|Q9I5Y8|Q9I5Y8_PSEAE Transketolase OS=Pseudomonas aeruginosa (strain ATCC 15692 / PAO1 / 1C / PRS 101 / LMG 12228) GN=tktA PE=1 SV=1	1	2	2	2	4.1	4.1	4.1	72.219	665	665	0	12.166	2060600	1				172	182;189	True;True	203;211	345;356	605;622	605;622
tr|Q9I612|Q9I612_PSEAE	tr|Q9I612|Q9I612_PSEAE	2	2	2	>tr|Q9I612|Q9I612_PSEAE Probable acyl-CoA dehydrogenase OS=Pseudomonas aeruginosa (strain ATCC 15692 / PAO1 / 1C / PRS 101 / LMG 12228) GN=PA0506 PE=3 SV=1	1	2	2	2	4	4	4	65.358	601	601	0	11.333	635450	2				173	202;365	True;True	225;399	376;662	646;1167	646;1167
tr|Q9I625|Q9I625_PSEAE	tr|Q9I625|Q9I625_PSEAE	1	1	1	>tr|Q9I625|Q9I625_PSEAE Probable biotin-requiring enzyme OS=Pseudomonas aeruginosa (strain ATCC 15692 / PAO1 / 1C / PRS 101 / LMG 12228) GN=PA0493 PE=4 SV=1	1	1	1	1	18.3	18.3	18.3	8.5205	82	82	0.0055866	5.5902	3968400	3				174	18	TRUE	18	32;33	74;75;76	76
tr|Q9I659|Q9I659_PSEAE;sp|Q9HVN5|CLPB_PSEAE	tr|Q9I659|Q9I659_PSEAE	7;2	7;2	7;2	>tr|Q9I659|Q9I659_PSEAE Probable ClpA/B protease ATP binding subunit OS=Pseudomonas aeruginosa (strain ATCC 15692 / PAO1 / 1C / PRS 101 / LMG 12228) GN=PA0459 PE=4 SV=1	2	7	7	7	10.4	10.4	10.4	94.174	850	850;854	0	50.226	4763500	9				175	39;416;486;503;581;629;726	True;True;True;True;True;True;True	41;451;532;550;634;683;785	72;753;910;911;939;1076;1077;1167;1355	146;1324;1651;1652;1694;1983;1984;2182;2517	146;1324;1652;1694;1983;2182;2517
tr|Q9I671|Q9I671_PSEAE	tr|Q9I671|Q9I671_PSEAE	2	2	2	>tr|Q9I671|Q9I671_PSEAE Glutaryl-CoA dehydrogenase OS=Pseudomonas aeruginosa (strain ATCC 15692 / PAO1 / 1C / PRS 101 / LMG 12228) GN=gcdH PE=3 SV=1	1	2	2	2	7.4	7.4	7.4	43.311	393	393	0	11.56	2890100	2				176	125;262	True;True	140;288	250;468	475;788	475;788
tr|Q9I689|Q9I689_PSEAE	tr|Q9I689|Q9I689_PSEAE	1	1	1	>tr|Q9I689|Q9I689_PSEAE ATP-dependent RNA helicase RhlE OS=Pseudomonas aeruginosa (strain ATCC 15692 / PAO1 / 1C / PRS 101 / LMG 12228) GN=rhlE PE=3 SV=1	1	1	1	1	2.5	2.5	2.5	70.111	639	639	0	7.3853	108890	1				177	98	TRUE	109	194	363	363
tr|Q9I6A0|Q9I6A0_PSEAE	tr|Q9I6A0|Q9I6A0_PSEAE	2	2	2	>tr|Q9I6A0|Q9I6A0_PSEAE Probable cystathionine gamma-lyase OS=Pseudomonas aeruginosa (strain ATCC 15692 / PAO1 / 1C / PRS 101 / LMG 12228) GN=PA0400 PE=3 SV=1	1	2	2	2	10.9	10.9	10.9	42.786	394	394	0	17.595	1866700	3				178	402;447	True;True	437;483	723;724;803;804	1269;1270;1271;1409;1410	1269;1410
tr|Q9I6H5|Q9I6H5_PSEAE	tr|Q9I6H5|Q9I6H5_PSEAE	3	3	3	>tr|Q9I6H5|Q9I6H5_PSEAE D-3-phosphoglycerate dehydrogenase OS=Pseudomonas aeruginosa (strain ATCC 15692 / PAO1 / 1C / PRS 101 / LMG 12228) GN=serA PE=3 SV=1	1	3	3	3	10.3	10.3	10.3	44.216	409	409	0	21.793	4111800	4				179	3;200;573	True;True;True	3;223;626	4;5;373;1057	5;6;642;1931	6;642;1931
tr|Q9I6J2|Q9I6J2_PSEAE	tr|Q9I6J2|Q9I6J2_PSEAE	2	2	2	>tr|Q9I6J2|Q9I6J2_PSEAE Putrescine aminotransferase OS=Pseudomonas aeruginosa (strain ATCC 15692 / PAO1 / 1C / PRS 101 / LMG 12228) GN=spuC PE=3 SV=1	1	2	2	2	7.7	7.7	7.7	50.452	456	456	0	11.013	1954300	1				180	169;712	True;True	189;771	326;1321	582;2431	582;2431
tr|Q9I6J5|Q9I6J5_PSEAE	tr|Q9I6J5|Q9I6J5_PSEAE	1	1	1	>tr|Q9I6J5|Q9I6J5_PSEAE Probable glutamine synthetase OS=Pseudomonas aeruginosa (strain ATCC 15692 / PAO1 / 1C / PRS 101 / LMG 12228) GN=spuI PE=3 SV=1	1	1	1	1	5.7	5.7	5.7	50.907	458	458	0	6.4103	1954500	3				181	620	TRUE	673	1151;1152	2124;2125;2126	2124
tr|Q9I6Z3|Q9I6Z3_PSEAE	tr|Q9I6Z3|Q9I6Z3_PSEAE	7	7	7	>tr|Q9I6Z3|Q9I6Z3_PSEAE Alkyl hydroperoxide reductase subunit C OS=Pseudomonas aeruginosa (strain ATCC 15692 / PAO1 / 1C / PRS 101 / LMG 12228) GN=ahpC PE=4 SV=1	1	7	7	7	51.3	51.3	51.3	20.541	187	187	0	50.011	51563000	22				182	77;194;251;558;595;613;704	True;True;True;True;True;True;True	85;217;276;609;648;666;763	150;151;152;363;364;449;1029;1030;1109;1110;1142;1143;1309;1310	303;304;305;306;307;308;309;310;311;629;630;748;1826;1827;1828;1829;2061;2062;2063;2114;2115;2116;2416;2417	303;629;748;1829;2062;2116;2417
tr|Q9I762|Q9I762_PSEAE	tr|Q9I762|Q9I762_PSEAE	1	1	1	>tr|Q9I762|Q9I762_PSEAE Uncharacterized protein OS=Pseudomonas aeruginosa (strain ATCC 15692 / PAO1 / 1C / PRS 101 / LMG 12228) GN=PA0070 PE=4 SV=1	1	1	1	1	3.3	3.3	3.3	31.716	304	304	0.0058824	5.7009	151060	1				183	298	TRUE	329	526	873	873
tr|Q9I765|Q9I765_PSEAE	tr|Q9I765|Q9I765_PSEAE	1	1	1	>tr|Q9I765|Q9I765_PSEAE Oligopeptidase A OS=Pseudomonas aeruginosa (strain ATCC 15692 / PAO1 / 1C / PRS 101 / LMG 12228) GN=prlC PE=3 SV=1	1	1	1	1	1.3	1.3	1.3	76.043	681	681	0.0061728	5.7851	0	1				184	737	TRUE	796	1373	2540	2540

## Sheet: 7-1 Sheet1
Protein IDs-C4HSL (full)
REV__tr|Q9HXW2|Q9HXW2_PSEAE
sp|G3XD23|WBPB_PSEAE
sp|G3XD61|WBPI_PSEAE
sp|G3XD94|UGND_PSEAE
sp|O52759|RS4_PSEAE
sp|O52760|RPOA_PSEAE
sp|O52762|CATA_PSEAE
sp|O54439|ACP1_PSEAE
sp|O68822|AMPA_PSEAE
sp|O69754|PHZF_PSEAE
sp|O82850|RS2_PSEAE
sp|O86428|ILVE_PSEAE
sp|P04739|FMPO_PSEAE
sp|P05384|DBHB_PSEAE
sp|P08308|OTCC_PSEAE
sp|P09591|EFTU_PSEAE
sp|P11221|OPRI_PSEAE
sp|P11436|AMIE_PSEAE
sp|P13794|PORF_PSEAE
sp|P13981|ARCA_PSEAE
sp|P13982|ARCC_PSEAE
sp|P14165|CISY_PSEAE
sp|P28810|MMSA_PSEAE;tr|Q9I5I2|Q9I5I2_PSEAE
sp|P30718|CH60_PSEAE
sp|P37798|ACCC_PSEAE
sp|P37799|BCCP_PSEAE
sp|P38100|CARB_PSEAE
sp|P43336|PHHC_PSEAE
sp|P47204|FTSZ_PSEAE
sp|P53593|SUCC_PSEAE
sp|P53641|SODF_PSEAE
sp|P72173|AAT_PSEAE
sp|Q51342|PUR1_PSEAE
sp|Q51422|SYDND_PSEAE
sp|Q51561|RPOB_PSEAE
sp|Q51567|SUCD_PSEAE
sp|Q59636|NDK_PSEAE
sp|Q59637|ODP1_PSEAE
sp|Q59638|ODP2_PSEAE
sp|Q9HT16|ATPF_PSEAE
sp|Q9HT18|ATPA_PSEAE
sp|Q9HT19|ATPG_PSEAE
sp|Q9HT20|ATPB_PSEAE
sp|Q9HTD7|ASPA_PSEAE
sp|Q9HTN8|RL28_PSEAE
sp|Q9HTZ7|PCKA_PSEAE
sp|Q9HU21|RMLC_PSEAE
sp|Q9HU56|SECB_PSEAE
sp|Q9HU65|GLNA_PSEAE
sp|Q9HU83|HUTU_PSEAE
sp|Q9HUC8|SYR_PSEAE
sp|Q9HUM6|PURA_PSEAE
sp|Q9HUM9|RS6_PSEAE
sp|Q9HV43|DNAK_PSEAE
sp|Q9HV59|PNP_PSEAE
sp|Q9HVA2|ILVC_PSEAE
sp|Q9HVC4|RL25_PSEAE
sp|Q9HW02|MURC_PSEAE
sp|Q9HWC9|RPOC_PSEAE
sp|Q9HWD2|EFG1_PSEAE;sp|Q9I244|EFG2_PSEAE
sp|Q9HWD5|RL3_PSEAE
sp|Q9HWD8|RL2_PSEAE
sp|Q9HWE5|RL14_PSEAE
sp|Q9HWF1|RL18_PSEAE
sp|Q9HWF7|RS13_PSEAE
sp|Q9HWG0|UVRA_PSEAE
sp|Q9HXJ5|SYH_PSEAE
sp|Q9HXM6|GUAA_PSEAE
sp|Q9HXN2|PUR4_PSEAE
sp|Q9HXZ4|PYRG_PSEAE
sp|Q9HZ71|RS1_PSEAE
sp|Q9HZ76|WBPE_PSEAE
sp|Q9HZA7|ACCD_PSEAE
sp|Q9HZE0|DHE2_PSEAE
sp|Q9HZJ2|FADB_PSEAE
sp|Q9I047|TAL_PSEAE
sp|Q9I0J6|NUOG_PSEAE
sp|Q9I0J9|NUOCD_PSEAE
sp|Q9I0K4|ACEA_PSEAE
sp|Q9I0Q0|PQSH_PSEAE
sp|Q9I1L9|DLDH1_PSEAE
sp|Q9I1M0|ODB2_PSEAE
sp|Q9I1M1|ODBB_PSEAE
sp|Q9I1M2|ODBA_PSEAE
sp|Q9I1Z9|Y2116_PSEAE
sp|Q9I2A8|ATOB_PSEAE
sp|Q9I2V5|ACNB_PSEAE
sp|Q9I3D1|DLDH2_PSEAE
sp|Q9I3F5|ACNA_PSEAE
sp|Q9I426|CYOB_PSEAE
sp|Q9I558|ACSA1_PSEAE
sp|Q9I576|HPPD_PSEAE
sp|Q9I589|CBPD_PSEAE
sp|Q9I5A5|PTA_PSEAE
sp|Q9I5Y1|ALF_PSEAE
sp|Q9I5Z0|METK_PSEAE
sp|Q9I617|BIOF_PSEAE
sp|Q9I636|MASZ_PSEAE
sp|Q9I685|SAHH_PSEAE
sp|Q9I6M4|DAVT_PSEAE
sp|Q9I6M5|DAVD_PSEAE
sp|Q9I6T2|POTA1_PSEAE
sp|Q9I747|HCP1_PSEAE
sp|Q9I7C4|DPO3B_PSEAE
sp|Q9S508|PHZB2_PSEAE;sp|O69753|PHZB1_PSEAE
sp|Q9X2T1|THIO_PSEAE
sp|Q9X4G0|HGD_PSEAE
tr|G3XCU6|G3XCU6_PSEAE
tr|G3XCZ6|G3XCZ6_PSEAE
tr|Q7DC80|Q7DC80_PSEAE
tr|Q9HTD1|Q9HTD1_PSEAE
tr|Q9HTD9|Q9HTD9_PSEAE
tr|Q9HTP2|Q9HTP2_PSEAE
tr|Q9HUD3|Q9HUD3_PSEAE
tr|Q9HUT6|Q9HUT6_PSEAE
tr|Q9HV54|Q9HV54_PSEAE
tr|Q9HV96|Q9HV96_PSEAE
tr|Q9HVJ1|Q9HVJ1_PSEAE
tr|Q9HVY5|Q9HVY5_PSEAE
tr|Q9HVY6|Q9HVY6_PSEAE
tr|Q9HW32|Q9HW32_PSEAE
tr|Q9HW49|Q9HW49_PSEAE
tr|Q9HW72|Q9HW72_PSEAE
tr|Q9HWG9|Q9HWG9_PSEAE
tr|Q9HWI2|Q9HWI2_PSEAE
tr|Q9HWQ0|Q9HWQ0_PSEAE
tr|Q9HWV0|Q9HWV0_PSEAE
tr|Q9HX05|Q9HX05_PSEAE;tr|Q9I2C4|Q9I2C4_PSEAE
tr|Q9HXM5|Q9HXM5_PSEAE
tr|Q9HY12|Q9HY12_PSEAE
tr|Q9HY13|Q9HY13_PSEAE
tr|Q9HY79|Q9HY79_PSEAE
tr|Q9HY81|Q9HY81_PSEAE
tr|Q9HYF1|Q9HYF1_PSEAE
tr|Q9HYT5|Q9HYT5_PSEAE
tr|Q9HZC5|Q9HZC5_PSEAE
tr|Q9HZK4|Q9HZK4_PSEAE
tr|Q9I028|Q9I028_PSEAE
tr|Q9I0L4|Q9I0L4_PSEAE
tr|Q9I0L5|Q9I0L5_PSEAE
tr|Q9I0T1|Q9I0T1_PSEAE
tr|Q9I0T2|Q9I0T2_PSEAE
tr|Q9I1E7|Q9I1E7_PSEAE
tr|Q9I1E8|Q9I1E8_PSEAE
tr|Q9I1H3|Q9I1H3_PSEAE
tr|Q9I1H5|Q9I1H5_PSEAE
tr|Q9I246|Q9I246_PSEAE
tr|Q9I296|Q9I296_PSEAE
tr|Q9I299|Q9I299_PSEAE
tr|Q9I2A2|Q9I2A2_PSEAE
tr|Q9I2A6|Q9I2A6_PSEAE
tr|Q9I2R2|Q9I2R2_PSEAE
tr|Q9I2V3|Q9I2V3_PSEAE
tr|Q9I2W9|Q9I2W9_PSEAE
tr|Q9I3B2|Q9I3B2_PSEAE
tr|Q9I3D3|Q9I3D3_PSEAE
tr|Q9I3D4|Q9I3D4_PSEAE
tr|Q9I3D5|Q9I3D5_PSEAE
tr|Q9I3G0|Q9I3G0_PSEAE
tr|Q9I3G2|Q9I3G2_PSEAE
tr|Q9I3G3|Q9I3G3_PSEAE
tr|Q9I3G6|Q9I3G6_PSEAE
tr|Q9I4I1|Q9I4I1_PSEAE
tr|Q9I5E3|Q9I5E3_PSEAE
tr|Q9I5F6|Q9I5F6_PSEAE
tr|Q9I5U9|Q9I5U9_PSEAE
tr|Q9I5Y8|Q9I5Y8_PSEAE
tr|Q9I612|Q9I612_PSEAE
tr|Q9I625|Q9I625_PSEAE
tr|Q9I659|Q9I659_PSEAE;sp|Q9HVN5|CLPB_PSEAE
tr|Q9I671|Q9I671_PSEAE
tr|Q9I689|Q9I689_PSEAE
tr|Q9I6A0|Q9I6A0_PSEAE
tr|Q9I6H5|Q9I6H5_PSEAE
tr|Q9I6J2|Q9I6J2_PSEAE
tr|Q9I6J5|Q9I6J5_PSEAE
tr|Q9I6Z3|Q9I6Z3_PSEAE
tr|Q9I762|Q9I762_PSEAE
tr|Q9I765|Q9I765_PSEAE
Probe 12 (subtracted)
REV__sp|P14165|CISY_PSEAE
sp|O30508|ARUC_PSEAE
sp|O52761|RL17_PSEAE
sp|O69753|PHZB1_PSEAE
sp|O82851|EFTS_PSEAE
sp|P00282|AZUR_PSEAE
sp|P15276|ALGP_PSEAE
sp|P57668|TPX_PSEAE
sp|Q9HUM0|HFQ_PSEAE
sp|Q9HVM1|RS20_PSEAE
sp|Q9HVY3|RS9_PSEAE
sp|Q9HWC6|RL1_PSEAE
sp|Q9HWC8|RL7_PSEAE
sp|Q9HWD1|RS7_PSEAE
sp|Q9HWE2|RL16_PSEAE
sp|Q9HWE4|RS17_PSEAE
sp|Q9HWE7|RL5_PSEAE
sp|Q9HWE8|RS14_PSEAE
sp|Q9HWF2|RS5_PSEAE
sp|Q9HWF4|RL15_PSEAE
sp|Q9HXZ2|ACCA_PSEAE
sp|Q9HXZ5|ENO_PSEAE
sp|Q9HYR9|CLPP2_PSEAE
sp|Q9HZP6|ETFB_PSEAE
sp|Q9I0A2|RL20_PSEAE
sp|Q9I3C5|HTPG_PSEAE
sp|Q9I7B8|SYGB_PSEAE
sp|Q9S508|PHZB2_PSEAE
tr|Q9HU11|Q9HU11_PSEAE
tr|Q9I2C4|Q9I2C4_PSEAE;tr|Q9HX05|Q9HX05_PSEAE
tr|Q9HXU8|Q9HXU8_PSEAE
tr|Q9HYZ6|Q9HYZ6_PSEAE
tr|Q9I056|Q9I056_PSEAE
tr|Q9I0Z9|Q9I0Z9_PSEAE
tr|Q9I1W0|Q9I1W0_PSEAE
tr|Q9I2A9|Q9I2A9_PSEAE
tr|Q9I3G1|Q9I3G1_PSEAE
tr|Q9I402|Q9I402_PSEAE
tr|Q9I585|Q9I585_PSEAE
tr|Q9I5P0|Q9I5P0_PSEAE

## Sheet: 7-1 Sheet2
Protein IDs-Probe 12 (subtracted)	Protein IDs-Probe 12 (full)			Fasta headers	Number of proteins	Peptides	Razor + unique peptides
REV__sp|P14165|CISY_PSEAE	REV__sp|P14165|CISY_PSEAE			>sp|P14165|CISY_PSEAE Citrate synthase OS=Pseudomonas aeruginosa (strain ATCC 15692 / PAO1 / 1C / PRS 101 / LMG 12228) GN=gltA PE=3 SV=2	1	1	1
sp|O30508|ARUC_PSEAE	sp|G3XD23|WBPB_PSEAE			>sp|G3XD23|WBPB_PSEAE UDP-N-acetyl-2-amino-2-deoxy-D-glucuronate oxidase OS=Pseudomonas aeruginosa (strain ATCC 15692 / PAO1 / 1C / PRS 101 / LMG 12228) GN=wbpB PE=1 SV=1	1	1	1
sp|O52761|RL17_PSEAE	sp|O30508|ARUC_PSEAE			>sp|O30508|ARUC_PSEAE Succinylornithine transaminase/acetylornithine aminotransferase OS=Pseudomonas aeruginosa (strain ATCC 15692 / PAO1 / 1C / PRS 101 / LMG 12228) GN=aruC PE=1 SV=2	1	1	1
sp|O69753|PHZB1_PSEAE	sp|O52759|RS4_PSEAE			>sp|O52759|RS4_PSEAE 30S ribosomal protein S4 OS=Pseudomonas aeruginosa (strain ATCC 15692 / PAO1 / 1C / PRS 101 / LMG 12228) GN=rpsD PE=3 SV=2	1	2	2
sp|O82851|EFTS_PSEAE	sp|O52761|RL17_PSEAE			>sp|O52761|RL17_PSEAE 50S ribosomal protein L17 OS=Pseudomonas aeruginosa (strain ATCC 15692 / PAO1 / 1C / PRS 101 / LMG 12228) GN=rplQ PE=3 SV=1	1	1	1
sp|P00282|AZUR_PSEAE	sp|O52762|CATA_PSEAE			>sp|O52762|CATA_PSEAE Catalase OS=Pseudomonas aeruginosa (strain ATCC 15692 / PAO1 / 1C / PRS 101 / LMG 12228) GN=katA PE=1 SV=1	1	7	7
sp|P15276|ALGP_PSEAE	sp|O54439|ACP1_PSEAE			>sp|O54439|ACP1_PSEAE Acyl carrier protein 1 OS=Pseudomonas aeruginosa (strain ATCC 15692 / PAO1 / 1C / PRS 101 / LMG 12228) GN=acpP1 PE=3 SV=4	1	1	1
sp|P57668|TPX_PSEAE	sp|O68822|AMPA_PSEAE			>sp|O68822|AMPA_PSEAE Cytosol aminopeptidase OS=Pseudomonas aeruginosa (strain ATCC 15692 / PAO1 / 1C / PRS 101 / LMG 12228) GN=pepA PE=3 SV=1	1	10	10
sp|Q9HUM0|HFQ_PSEAE	sp|O69753|PHZB1_PSEAE			>sp|O69753|PHZB1_PSEAE Phenazine biosynthesis protein PhzB 1 OS=Pseudomonas aeruginosa (strain ATCC 15692 / PAO1 / 1C / PRS 101 / LMG 12228) GN=phzB1 PE=3 SV=1	1	4	1
sp|Q9HVM1|RS20_PSEAE	sp|O69754|PHZF_PSEAE			>sp|O69754|PHZF_PSEAE Trans-2,3-dihydro-3-hydroxyanthranilate isomerase OS=Pseudomonas aeruginosa (strain ATCC 15692 / PAO1 / 1C / PRS 101 / LMG 12228) GN=phzF1 PE=3 SV=2	1	4	4
sp|Q9HVY3|RS9_PSEAE	sp|O82850|RS2_PSEAE			>sp|O82850|RS2_PSEAE 30S ribosomal protein S2 OS=Pseudomonas aeruginosa (strain ATCC 15692 / PAO1 / 1C / PRS 101 / LMG 12228) GN=rpsB PE=3 SV=2	1	1	1
sp|Q9HWC6|RL1_PSEAE	sp|O82851|EFTS_PSEAE			>sp|O82851|EFTS_PSEAE Elongation factor Ts OS=Pseudomonas aeruginosa (strain ATCC 15692 / PAO1 / 1C / PRS 101 / LMG 12228) GN=tsf PE=3 SV=1	1	1	1
sp|Q9HWC8|RL7_PSEAE	sp|O86428|ILVE_PSEAE			>sp|O86428|ILVE_PSEAE Branched-chain-amino-acid aminotransferase OS=Pseudomonas aeruginosa (strain ATCC 15692 / PAO1 / 1C / PRS 101 / LMG 12228) GN=ilvE PE=1 SV=2	1	2	2
sp|Q9HWD1|RS7_PSEAE	sp|P00282|AZUR_PSEAE			>sp|P00282|AZUR_PSEAE Azurin OS=Pseudomonas aeruginosa (strain ATCC 15692 / PAO1 / 1C / PRS 101 / LMG 12228) GN=azu PE=1 SV=2	1	1	1
sp|Q9HWE2|RL16_PSEAE	sp|P04739|FMPO_PSEAE			>sp|P04739|FMPO_PSEAE Fimbrial protein OS=Pseudomonas aeruginosa (strain ATCC 15692 / PAO1 / 1C / PRS 101 / LMG 12228) GN=pilA PE=1 SV=1	1	3	3
sp|Q9HWE4|RS17_PSEAE	sp|P05384|DBHB_PSEAE			>sp|P05384|DBHB_PSEAE DNA-binding protein HU-beta OS=Pseudomonas aeruginosa (strain ATCC 15692 / PAO1 / 1C / PRS 101 / LMG 12228) GN=hupB PE=1 SV=3	1	2	2
sp|Q9HWE7|RL5_PSEAE	sp|P08308|OTCC_PSEAE			>sp|P08308|OTCC_PSEAE Ornithine carbamoyltransferase, catabolic OS=Pseudomonas aeruginosa (strain ATCC 15692 / PAO1 / 1C / PRS 101 / LMG 12228) GN=arcB PE=1 SV=3	1	8	8
sp|Q9HWE8|RS14_PSEAE	sp|P09591|EFTU_PSEAE			>sp|P09591|EFTU_PSEAE Elongation factor Tu OS=Pseudomonas aeruginosa (strain ATCC 15692 / PAO1 / 1C / PRS 101 / LMG 12228) GN=tufA PE=1 SV=2	1	11	11
sp|Q9HWF2|RS5_PSEAE	sp|P11221|OPRI_PSEAE			>sp|P11221|OPRI_PSEAE Major outer membrane lipoprotein OS=Pseudomonas aeruginosa (strain ATCC 15692 / PAO1 / 1C / PRS 101 / LMG 12228) GN=oprI PE=3 SV=1	1	1	1
sp|Q9HWF4|RL15_PSEAE	sp|P13794|PORF_PSEAE			>sp|P13794|PORF_PSEAE Outer membrane porin F OS=Pseudomonas aeruginosa (strain ATCC 15692 / PAO1 / 1C / PRS 101 / LMG 12228) GN=oprF PE=1 SV=1	1	5	5
sp|Q9HXZ2|ACCA_PSEAE	sp|P13981|ARCA_PSEAE			>sp|P13981|ARCA_PSEAE Arginine deiminase OS=Pseudomonas aeruginosa (strain ATCC 15692 / PAO1 / 1C / PRS 101 / LMG 12228) GN=arcA PE=1 SV=2	1	17	17
sp|Q9HXZ5|ENO_PSEAE	sp|P13982|ARCC_PSEAE			>sp|P13982|ARCC_PSEAE Carbamate kinase OS=Pseudomonas aeruginosa (strain ATCC 15692 / PAO1 / 1C / PRS 101 / LMG 12228) GN=arcC PE=3 SV=1	1	3	3
sp|Q9HYR9|CLPP2_PSEAE	sp|P15276|ALGP_PSEAE			>sp|P15276|ALGP_PSEAE Transcriptional regulatory protein AlgP OS=Pseudomonas aeruginosa (strain ATCC 15692 / PAO1 / 1C / PRS 101 / LMG 12228) GN=algP PE=4 SV=2	1	2	2
sp|Q9HZP6|ETFB_PSEAE	sp|P30718|CH60_PSEAE			>sp|P30718|CH60_PSEAE 60 kDa chaperonin OS=Pseudomonas aeruginosa (strain ATCC 15692 / PAO1 / 1C / PRS 101 / LMG 12228) GN=groL PE=1 SV=3	1	21	21
sp|Q9I0A2|RL20_PSEAE	sp|P37798|ACCC_PSEAE			>sp|P37798|ACCC_PSEAE Biotin carboxylase OS=Pseudomonas aeruginosa (strain ATCC 15692 / PAO1 / 1C / PRS 101 / LMG 12228) GN=accC PE=1 SV=1	1	3	3
sp|Q9I3C5|HTPG_PSEAE	sp|P37799|BCCP_PSEAE			>sp|P37799|BCCP_PSEAE Biotin carboxyl carrier protein of acetyl-CoA carboxylase OS=Pseudomonas aeruginosa (strain ATCC 15692 / PAO1 / 1C / PRS 101 / LMG 12228) GN=accB PE=3 SV=1	1	8	8
sp|Q9I7B8|SYGB_PSEAE	sp|P38100|CARB_PSEAE			>sp|P38100|CARB_PSEAE Carbamoyl-phosphate synthase large chain OS=Pseudomonas aeruginosa (strain ATCC 15692 / PAO1 / 1C / PRS 101 / LMG 12228) GN=carB PE=3 SV=3	1	1	1
sp|Q9S508|PHZB2_PSEAE	sp|P43336|PHHC_PSEAE			>sp|P43336|PHHC_PSEAE Aromatic-amino-acid aminotransferase OS=Pseudomonas aeruginosa (strain ATCC 15692 / PAO1 / 1C / PRS 101 / LMG 12228) GN=phhC PE=3 SV=2	1	4	4
tr|Q9HU11|Q9HU11_PSEAE	sp|P47204|FTSZ_PSEAE			>sp|P47204|FTSZ_PSEAE Cell division protein FtsZ OS=Pseudomonas aeruginosa (strain ATCC 15692 / PAO1 / 1C / PRS 101 / LMG 12228) GN=ftsZ PE=1 SV=2	1	1	1
tr|Q9I2C4|Q9I2C4_PSEAE;tr|Q9HX05|Q9HX05_PSEAE	sp|P53593|SUCC_PSEAE			>sp|P53593|SUCC_PSEAE Succinyl-CoA ligase [ADP-forming] subunit beta OS=Pseudomonas aeruginosa (strain ATCC 15692 / PAO1 / 1C / PRS 101 / LMG 12228) GN=sucC PE=3 SV=2	1	11	11
tr|Q9HXU8|Q9HXU8_PSEAE	sp|P53641|SODF_PSEAE			>sp|P53641|SODF_PSEAE Superoxide dismutase [Fe] OS=Pseudomonas aeruginosa (strain ATCC 15692 / PAO1 / 1C / PRS 101 / LMG 12228) GN=sodB PE=3 SV=3	1	3	3
tr|Q9HYZ6|Q9HYZ6_PSEAE	sp|P57668|TPX_PSEAE			>sp|P57668|TPX_PSEAE Probable thiol peroxidase OS=Pseudomonas aeruginosa (strain ATCC 15692 / PAO1 / 1C / PRS 101 / LMG 12228) GN=tpx PE=3 SV=1	1	1	1
tr|Q9I056|Q9I056_PSEAE	sp|Q51422|SYDND_PSEAE			>sp|Q51422|SYDND_PSEAE Aspartate--tRNA(Asp/Asn) ligase OS=Pseudomonas aeruginosa (strain ATCC 15692 / PAO1 / 1C / PRS 101 / LMG 12228) GN=aspS PE=1 SV=2	1	1	1
tr|Q9I0Z9|Q9I0Z9_PSEAE	sp|Q51561|RPOB_PSEAE			>sp|Q51561|RPOB_PSEAE DNA-directed RNA polymerase subunit beta OS=Pseudomonas aeruginosa (strain ATCC 15692 / PAO1 / 1C / PRS 101 / LMG 12228) GN=rpoB PE=3 SV=2	1	5	5
tr|Q9I1W0|Q9I1W0_PSEAE	sp|Q51567|SUCD_PSEAE			>sp|Q51567|SUCD_PSEAE Succinyl-CoA ligase [ADP-forming] subunit alpha OS=Pseudomonas aeruginosa (strain ATCC 15692 / PAO1 / 1C / PRS 101 / LMG 12228) GN=sucD PE=3 SV=2	1	4	4
tr|Q9I2A9|Q9I2A9_PSEAE	sp|Q59636|NDK_PSEAE			>sp|Q59636|NDK_PSEAE Nucleoside diphosphate kinase OS=Pseudomonas aeruginosa (strain ATCC 15692 / PAO1 / 1C / PRS 101 / LMG 12228) GN=ndk PE=3 SV=2	1	1	1
tr|Q9I3G1|Q9I3G1_PSEAE	sp|Q59637|ODP1_PSEAE			>sp|Q59637|ODP1_PSEAE Pyruvate dehydrogenase E1 component OS=Pseudomonas aeruginosa (strain ATCC 15692 / PAO1 / 1C / PRS 101 / LMG 12228) GN=aceE PE=3 SV=2	1	3	3
tr|Q9I402|Q9I402_PSEAE	sp|Q59638|ODP2_PSEAE			>sp|Q59638|ODP2_PSEAE Dihydrolipoyllysine-residue acetyltransferase component of pyruvate dehydrogenase complex OS=Pseudomonas aeruginosa (strain ATCC 15692 / PAO1 / 1C / PRS 101 / LMG 12228) GN=aceF PE=2 SV=2	1	1	1
tr|Q9I585|Q9I585_PSEAE	sp|Q9HT16|ATPF_PSEAE			>sp|Q9HT16|ATPF_PSEAE ATP synthase subunit b OS=Pseudomonas aeruginosa (strain ATCC 15692 / PAO1 / 1C / PRS 101 / LMG 12228) GN=atpF PE=3 SV=1	1	2	2
tr|Q9I5P0|Q9I5P0_PSEAE	sp|Q9HT18|ATPA_PSEAE			>sp|Q9HT18|ATPA_PSEAE ATP synthase subunit alpha OS=Pseudomonas aeruginosa (strain ATCC 15692 / PAO1 / 1C / PRS 101 / LMG 12228) GN=atpA PE=3 SV=1	1	13	13
	sp|Q9HT19|ATPG_PSEAE			>sp|Q9HT19|ATPG_PSEAE ATP synthase gamma chain OS=Pseudomonas aeruginosa (strain ATCC 15692 / PAO1 / 1C / PRS 101 / LMG 12228) GN=atpG PE=3 SV=1	1	1	1
	sp|Q9HT20|ATPB_PSEAE			>sp|Q9HT20|ATPB_PSEAE ATP synthase subunit beta OS=Pseudomonas aeruginosa (strain ATCC 15692 / PAO1 / 1C / PRS 101 / LMG 12228) GN=atpD PE=3 SV=1	1	9	9
	sp|Q9HTD7|ASPA_PSEAE			>sp|Q9HTD7|ASPA_PSEAE Aspartate ammonia-lyase OS=Pseudomonas aeruginosa (strain ATCC 15692 / PAO1 / 1C / PRS 101 / LMG 12228) GN=aspA PE=3 SV=1	1	1	1
	sp|Q9HTN8|RL28_PSEAE			>sp|Q9HTN8|RL28_PSEAE 50S ribosomal protein L28 OS=Pseudomonas aeruginosa (strain ATCC 15692 / PAO1 / 1C / PRS 101 / LMG 12228) GN=rpmB PE=3 SV=1	1	1	1
	sp|Q9HU21|RMLC_PSEAE			>sp|Q9HU21|RMLC_PSEAE dTDP-4-dehydrorhamnose 3,5-epimerase OS=Pseudomonas aeruginosa (strain ATCC 15692 / PAO1 / 1C / PRS 101 / LMG 12228) GN=rmlC PE=1 SV=1	1	1	1
	sp|Q9HU65|GLNA_PSEAE			>sp|Q9HU65|GLNA_PSEAE Glutamine synthetase OS=Pseudomonas aeruginosa (strain ATCC 15692 / PAO1 / 1C / PRS 101 / LMG 12228) GN=glnA PE=1 SV=1	1	4	4
	sp|Q9HU83|HUTU_PSEAE			>sp|Q9HU83|HUTU_PSEAE Urocanate hydratase OS=Pseudomonas aeruginosa (strain ATCC 15692 / PAO1 / 1C / PRS 101 / LMG 12228) GN=hutU PE=1 SV=1	1	1	1
	sp|Q9HUM0|HFQ_PSEAE			>sp|Q9HUM0|HFQ_PSEAE RNA-binding protein Hfq OS=Pseudomonas aeruginosa (strain ATCC 15692 / PAO1 / 1C / PRS 101 / LMG 12228) GN=hfq PE=1 SV=1	1	1	1
	sp|Q9HUM6|PURA_PSEAE			>sp|Q9HUM6|PURA_PSEAE Adenylosuccinate synthetase OS=Pseudomonas aeruginosa (strain ATCC 15692 / PAO1 / 1C / PRS 101 / LMG 12228) GN=purA PE=3 SV=1	1	2	2
	sp|Q9HV43|DNAK_PSEAE			>sp|Q9HV43|DNAK_PSEAE Chaperone protein DnaK OS=Pseudomonas aeruginosa (strain ATCC 15692 / PAO1 / 1C / PRS 101 / LMG 12228) GN=dnaK PE=3 SV=1	1	3	3
	sp|Q9HV59|PNP_PSEAE			>sp|Q9HV59|PNP_PSEAE Polyribonucleotide nucleotidyltransferase OS=Pseudomonas aeruginosa (strain ATCC 15692 / PAO1 / 1C / PRS 101 / LMG 12228) GN=pnp PE=3 SV=1	1	1	1
	sp|Q9HVA2|ILVC_PSEAE			>sp|Q9HVA2|ILVC_PSEAE Ketol-acid reductoisomerase OS=Pseudomonas aeruginosa (strain ATCC 15692 / PAO1 / 1C / PRS 101 / LMG 12228) GN=ilvC PE=1 SV=1	1	1	1
	sp|Q9HVM1|RS20_PSEAE			>sp|Q9HVM1|RS20_PSEAE 30S ribosomal protein S20 OS=Pseudomonas aeruginosa (strain ATCC 15692 / PAO1 / 1C / PRS 101 / LMG 12228) GN=rpsT PE=1 SV=3	1	1	1
	sp|Q9HVY3|RS9_PSEAE			>sp|Q9HVY3|RS9_PSEAE 30S ribosomal protein S9 OS=Pseudomonas aeruginosa (strain ATCC 15692 / PAO1 / 1C / PRS 101 / LMG 12228) GN=rpsI PE=3 SV=1	1	1	1
	sp|Q9HWC6|RL1_PSEAE			>sp|Q9HWC6|RL1_PSEAE 50S ribosomal protein L1 OS=Pseudomonas aeruginosa (strain ATCC 15692 / PAO1 / 1C / PRS 101 / LMG 12228) GN=rplA PE=3 SV=1	1	1	1
	sp|Q9HWC8|RL7_PSEAE			>sp|Q9HWC8|RL7_PSEAE 50S ribosomal protein L7/L12 OS=Pseudomonas aeruginosa (strain ATCC 15692 / PAO1 / 1C / PRS 101 / LMG 12228) GN=rplL PE=3 SV=1	1	1	1
	sp|Q9HWC9|RPOC_PSEAE			>sp|Q9HWC9|RPOC_PSEAE DNA-directed RNA polymerase subunit beta OS=Pseudomonas aeruginosa (strain ATCC 15692 / PAO1 / 1C / PRS 101 / LMG 12228) GN=rpoC PE=3 SV=1	1	2	2
	sp|Q9HWD1|RS7_PSEAE			>sp|Q9HWD1|RS7_PSEAE 30S ribosomal protein S7 OS=Pseudomonas aeruginosa (strain ATCC 15692 / PAO1 / 1C / PRS 101 / LMG 12228) GN=rpsG PE=3 SV=1	1	2	2
	sp|Q9HWD2|EFG1_PSEAE;sp|Q9I244|EFG2_PSEAE			>sp|Q9HWD2|EFG1_PSEAE Elongation factor G 1 OS=Pseudomonas aeruginosa (strain ATCC 15692 / PAO1 / 1C / PRS 101 / LMG 12228) GN=fusA PE=1 SV=1	2	12	12
	sp|Q9HWD5|RL3_PSEAE			>sp|Q9HWD5|RL3_PSEAE 50S ribosomal protein L3 OS=Pseudomonas aeruginosa (strain ATCC 15692 / PAO1 / 1C / PRS 101 / LMG 12228) GN=rplC PE=3 SV=1	1	1	1
	sp|Q9HWD8|RL2_PSEAE			>sp|Q9HWD8|RL2_PSEAE 50S ribosomal protein L2 OS=Pseudomonas aeruginosa (strain ATCC 15692 / PAO1 / 1C / PRS 101 / LMG 12228) GN=rplB PE=3 SV=1	1	2	2
	sp|Q9HWE2|RL16_PSEAE			>sp|Q9HWE2|RL16_PSEAE 50S ribosomal protein L16 OS=Pseudomonas aeruginosa (strain ATCC 15692 / PAO1 / 1C / PRS 101 / LMG 12228) GN=rplP PE=3 SV=1	1	3	3
	sp|Q9HWE4|RS17_PSEAE			>sp|Q9HWE4|RS17_PSEAE 30S ribosomal protein S17 OS=Pseudomonas aeruginosa (strain ATCC 15692 / PAO1 / 1C / PRS 101 / LMG 12228) GN=rpsQ PE=3 SV=1	1	1	1
	sp|Q9HWE5|RL14_PSEAE			>sp|Q9HWE5|RL14_PSEAE 50S ribosomal protein L14 OS=Pseudomonas aeruginosa (strain ATCC 15692 / PAO1 / 1C / PRS 101 / LMG 12228) GN=rplN PE=3 SV=1	1	1	1
	sp|Q9HWE7|RL5_PSEAE			>sp|Q9HWE7|RL5_PSEAE 50S ribosomal protein L5 OS=Pseudomonas aeruginosa (strain ATCC 15692 / PAO1 / 1C / PRS 101 / LMG 12228) GN=rplE PE=3 SV=1	1	1	1
	sp|Q9HWE8|RS14_PSEAE			>sp|Q9HWE8|RS14_PSEAE 30S ribosomal protein S14 OS=Pseudomonas aeruginosa (strain ATCC 15692 / PAO1 / 1C / PRS 101 / LMG 12228) GN=rpsN PE=3 SV=1	1	1	1
	sp|Q9HWF2|RS5_PSEAE			>sp|Q9HWF2|RS5_PSEAE 30S ribosomal protein S5 OS=Pseudomonas aeruginosa (strain ATCC 15692 / PAO1 / 1C / PRS 101 / LMG 12228) GN=rpsE PE=3 SV=1	1	1	1
	sp|Q9HWF4|RL15_PSEAE			>sp|Q9HWF4|RL15_PSEAE 50S ribosomal protein L15 OS=Pseudomonas aeruginosa (strain ATCC 15692 / PAO1 / 1C / PRS 101 / LMG 12228) GN=rplO PE=3 SV=1	1	1	1
	sp|Q9HWF7|RS13_PSEAE			>sp|Q9HWF7|RS13_PSEAE 30S ribosomal protein S13 OS=Pseudomonas aeruginosa (strain ATCC 15692 / PAO1 / 1C / PRS 101 / LMG 12228) GN=rpsM PE=3 SV=1	1	1	1
	sp|Q9HXZ2|ACCA_PSEAE			>sp|Q9HXZ2|ACCA_PSEAE Acetyl-coenzyme A carboxylase carboxyl transferase subunit alpha OS=Pseudomonas aeruginosa (strain ATCC 15692 / PAO1 / 1C / PRS 101 / LMG 12228) GN=accA PE=1 SV=1	1	1	1
	sp|Q9HXZ5|ENO_PSEAE			>sp|Q9HXZ5|ENO_PSEAE Enolase OS=Pseudomonas aeruginosa (strain ATCC 15692 / PAO1 / 1C / PRS 101 / LMG 12228) GN=eno PE=3 SV=1	1	1	1
	sp|Q9HYR9|CLPP2_PSEAE			>sp|Q9HYR9|CLPP2_PSEAE ATP-dependent Clp protease proteolytic subunit 2 OS=Pseudomonas aeruginosa (strain ATCC 15692 / PAO1 / 1C / PRS 101 / LMG 12228) GN=clpP2 PE=3 SV=1	1	1	1
	sp|Q9HZ71|RS1_PSEAE			>sp|Q9HZ71|RS1_PSEAE 30S ribosomal protein S1 OS=Pseudomonas aeruginosa (strain ATCC 15692 / PAO1 / 1C / PRS 101 / LMG 12228) GN=rpsA PE=3 SV=1	1	5	5
	sp|Q9HZ76|WBPE_PSEAE			>sp|Q9HZ76|WBPE_PSEAE UDP-2-acetamido-2-deoxy-3-oxo-D-glucuronate aminotransferase OS=Pseudomonas aeruginosa (strain ATCC 15692 / PAO1 / 1C / PRS 101 / LMG 12228) GN=wbpE PE=1 SV=1	1	1	1
	sp|Q9HZE0|DHE2_PSEAE			>sp|Q9HZE0|DHE2_PSEAE NAD-specific glutamate dehydrogenase OS=Pseudomonas aeruginosa (strain ATCC 15692 / PAO1 / 1C / PRS 101 / LMG 12228) GN=gdhB PE=1 SV=1	1	7	7
	sp|Q9HZJ2|FADB_PSEAE			>sp|Q9HZJ2|FADB_PSEAE Fatty acid oxidation complex subunit alpha OS=Pseudomonas aeruginosa (strain ATCC 15692 / PAO1 / 1C / PRS 101 / LMG 12228) GN=fadB PE=3 SV=1	1	2	2
	sp|Q9HZP6|ETFB_PSEAE			>sp|Q9HZP6|ETFB_PSEAE Electron transfer flavoprotein subunit beta OS=Pseudomonas aeruginosa (strain ATCC 15692 / PAO1 / 1C / PRS 101 / LMG 12228) GN=etfB PE=3 SV=1	1	3	3
	sp|Q9I0A2|RL20_PSEAE			>sp|Q9I0A2|RL20_PSEAE 50S ribosomal protein L20 OS=Pseudomonas aeruginosa (strain ATCC 15692 / PAO1 / 1C / PRS 101 / LMG 12228) GN=rplT PE=3 SV=1	1	1	1
	sp|Q9I0J6|NUOG_PSEAE			>sp|Q9I0J6|NUOG_PSEAE NADH-quinone oxidoreductase subunit G OS=Pseudomonas aeruginosa (strain ATCC 15692 / PAO1 / 1C / PRS 101 / LMG 12228) GN=nuoG PE=3 SV=1	1	2	2
	sp|Q9I0J9|NUOCD_PSEAE			>sp|Q9I0J9|NUOCD_PSEAE NADH-quinone oxidoreductase subunit C/D OS=Pseudomonas aeruginosa (strain ATCC 15692 / PAO1 / 1C / PRS 101 / LMG 12228) GN=nuoC PE=3 SV=1	1	1	1
	sp|Q9I0K4|ACEA_PSEAE			>sp|Q9I0K4|ACEA_PSEAE Isocitrate lyase OS=Pseudomonas aeruginosa (strain ATCC 15692 / PAO1 / 1C / PRS 101 / LMG 12228) GN=PA2634 PE=1 SV=1	1	7	7
	sp|Q9I0Q0|PQSH_PSEAE			>sp|Q9I0Q0|PQSH_PSEAE 2-heptyl-3-hydroxy-4(1H)-quinolone synthase OS=Pseudomonas aeruginosa (strain ATCC 15692 / PAO1 / 1C / PRS 101 / LMG 12228) GN=pqsH PE=3 SV=1	1	1	1
	sp|Q9I1L9|DLDH1_PSEAE			>sp|Q9I1L9|DLDH1_PSEAE Dihydrolipoyl dehydrogenase OS=Pseudomonas aeruginosa (strain ATCC 15692 / PAO1 / 1C / PRS 101 / LMG 12228) GN=lpdV PE=1 SV=1	1	2	2
	sp|Q9I1M0|ODB2_PSEAE			>sp|Q9I1M0|ODB2_PSEAE Lipoamide acyltransferase component of branched-chain alpha-keto acid dehydrogenase complex OS=Pseudomonas aeruginosa (strain ATCC 15692 / PAO1 / 1C / PRS 101 / LMG 12228) GN=bkdB PE=1 SV=1	1	1	1
	sp|Q9I1M2|ODBA_PSEAE			>sp|Q9I1M2|ODBA_PSEAE 2-oxoisovalerate dehydrogenase subunit alpha OS=Pseudomonas aeruginosa (strain ATCC 15692 / PAO1 / 1C / PRS 101 / LMG 12228) GN=bkdA1 PE=3 SV=1	1	1	1
	sp|Q9I1Z9|Y2116_PSEAE			>sp|Q9I1Z9|Y2116_PSEAE UPF0317 protein PA2116 OS=Pseudomonas aeruginosa (strain ATCC 15692 / PAO1 / 1C / PRS 101 / LMG 12228) GN=PA2116 PE=3 SV=1	1	1	1
	sp|Q9I2A8|ATOB_PSEAE			>sp|Q9I2A8|ATOB_PSEAE Acetyl-CoA acetyltransferase OS=Pseudomonas aeruginosa (strain ATCC 15692 / PAO1 / 1C / PRS 101 / LMG 12228) GN=atoB PE=3 SV=1	1	1	1
	sp|Q9I2V5|ACNB_PSEAE			>sp|Q9I2V5|ACNB_PSEAE Aconitate hydratase B OS=Pseudomonas aeruginosa (strain ATCC 15692 / PAO1 / 1C / PRS 101 / LMG 12228) GN=acnB PE=3 SV=1	1	8	8
	sp|Q9I3C5|HTPG_PSEAE			>sp|Q9I3C5|HTPG_PSEAE Chaperone protein HtpG OS=Pseudomonas aeruginosa (strain ATCC 15692 / PAO1 / 1C / PRS 101 / LMG 12228) GN=htpG PE=3 SV=1	1	1	1
	sp|Q9I3D1|DLDH2_PSEAE			>sp|Q9I3D1|DLDH2_PSEAE Dihydrolipoyl dehydrogenase OS=Pseudomonas aeruginosa (strain ATCC 15692 / PAO1 / 1C / PRS 101 / LMG 12228) GN=lpdG PE=3 SV=1	1	8	8
	sp|Q9I3F5|ACNA_PSEAE			>sp|Q9I3F5|ACNA_PSEAE Aconitate hydratase A OS=Pseudomonas aeruginosa (strain ATCC 15692 / PAO1 / 1C / PRS 101 / LMG 12228) GN=acnA PE=3 SV=1	1	12	12
	sp|Q9I558|ACSA1_PSEAE			>sp|Q9I558|ACSA1_PSEAE Acetyl-coenzyme A synthetase 1 OS=Pseudomonas aeruginosa (strain ATCC 15692 / PAO1 / 1C / PRS 101 / LMG 12228) GN=acsA1 PE=3 SV=1	1	1	1
	sp|Q9I576|HPPD_PSEAE			>sp|Q9I576|HPPD_PSEAE 4-hydroxyphenylpyruvate dioxygenase OS=Pseudomonas aeruginosa (strain ATCC 15692 / PAO1 / 1C / PRS 101 / LMG 12228) GN=hpd PE=3 SV=1	1	2	2
	sp|Q9I589|CBPD_PSEAE			>sp|Q9I589|CBPD_PSEAE Chitin-binding protein CbpD OS=Pseudomonas aeruginosa (strain ATCC 15692 / PAO1 / 1C / PRS 101 / LMG 12228) GN=cbpD PE=1 SV=1	1	1	1
	sp|Q9I5Z0|METK_PSEAE			>sp|Q9I5Z0|METK_PSEAE S-adenosylmethionine synthase OS=Pseudomonas aeruginosa (strain ATCC 15692 / PAO1 / 1C / PRS 101 / LMG 12228) GN=metK PE=3 SV=1	1	1	1
	sp|Q9I617|BIOF_PSEAE			>sp|Q9I617|BIOF_PSEAE 8-amino-7-oxononanoate synthase OS=Pseudomonas aeruginosa (strain ATCC 15692 / PAO1 / 1C / PRS 101 / LMG 12228) GN=bioF PE=3 SV=1	1	1	1
	sp|Q9I685|SAHH_PSEAE			>sp|Q9I685|SAHH_PSEAE Adenosylhomocysteinase OS=Pseudomonas aeruginosa (strain ATCC 15692 / PAO1 / 1C / PRS 101 / LMG 12228) GN=ahcY PE=3 SV=1	1	7	7
	sp|Q9I6M4|DAVT_PSEAE			>sp|Q9I6M4|DAVT_PSEAE 5-aminovalerate aminotransferase DavT OS=Pseudomonas aeruginosa (strain ATCC 15692 / PAO1 / 1C / PRS 101 / LMG 12228) GN=davT PE=1 SV=1	1	2	2
	sp|Q9I6M5|DAVD_PSEAE			>sp|Q9I6M5|DAVD_PSEAE Glutarate-semialdehyde dehydrogenase DavD OS=Pseudomonas aeruginosa (strain ATCC 15692 / PAO1 / 1C / PRS 101 / LMG 12228) GN=davD PE=1 SV=1	1	2	2
	sp|Q9I747|HCP1_PSEAE			>sp|Q9I747|HCP1_PSEAE Protein hcp1 OS=Pseudomonas aeruginosa (strain ATCC 15692 / PAO1 / 1C / PRS 101 / LMG 12228) GN=hcp1 PE=1 SV=1	1	2	2
	sp|Q9I7B8|SYGB_PSEAE			>sp|Q9I7B8|SYGB_PSEAE Glycine--tRNA ligase beta subunit OS=Pseudomonas aeruginosa (strain ATCC 15692 / PAO1 / 1C / PRS 101 / LMG 12228) GN=glyS PE=3 SV=1	1	1	1
	sp|Q9I7C4|DPO3B_PSEAE			>sp|Q9I7C4|DPO3B_PSEAE DNA polymerase III subunit beta OS=Pseudomonas aeruginosa (strain ATCC 15692 / PAO1 / 1C / PRS 101 / LMG 12228) GN=dnaN PE=3 SV=1	1	1	1
	sp|Q9S508|PHZB2_PSEAE			>sp|Q9S508|PHZB2_PSEAE Phenazine biosynthesis protein PhzB 2 OS=Pseudomonas aeruginosa (strain ATCC 15692 / PAO1 / 1C / PRS 101 / LMG 12228) GN=phzB2 PE=1 SV=1	1	5	5
	sp|Q9X2T1|THIO_PSEAE			>sp|Q9X2T1|THIO_PSEAE Thioredoxin OS=Pseudomonas aeruginosa (strain ATCC 15692 / PAO1 / 1C / PRS 101 / LMG 12228) GN=trxA PE=3 SV=1	1	1	1
	tr|Q9HTD1|Q9HTD1_PSEAE			>tr|Q9HTD1|Q9HTD1_PSEAE Probable transcarboxylase subunit OS=Pseudomonas aeruginosa (strain ATCC 15692 / PAO1 / 1C / PRS 101 / LMG 12228) GN=PA5435 PE=4 SV=1	1	26	26
	tr|Q9HTD9|Q9HTD9_PSEAE			>tr|Q9HTD9|Q9HTD9_PSEAE Alcohol dehydrogenase OS=Pseudomonas aeruginosa (strain ATCC 15692 / PAO1 / 1C / PRS 101 / LMG 12228) GN=adhA PE=1 SV=1	1	2	2
	tr|Q9HTP2|Q9HTP2_PSEAE			>tr|Q9HTP2|Q9HTP2_PSEAE Probable aldehyde dehydrogenase OS=Pseudomonas aeruginosa (strain ATCC 15692 / PAO1 / 1C / PRS 101 / LMG 12228) GN=PA5312 PE=3 SV=1	1	3	3
	tr|Q9HU11|Q9HU11_PSEAE			>tr|Q9HU11|Q9HU11_PSEAE Uncharacterized protein OS=Pseudomonas aeruginosa (strain ATCC 15692 / PAO1 / 1C / PRS 101 / LMG 12228) GN=PA5178 PE=4 SV=1	1	1	1
	tr|Q9HUD3|Q9HUD3_PSEAE			>tr|Q9HUD3|Q9HUD3_PSEAE Malic enzyme OS=Pseudomonas aeruginosa (strain ATCC 15692 / PAO1 / 1C / PRS 101 / LMG 12228) GN=PA5046 PE=4 SV=1	1	1	1
	tr|Q9HVJ1|Q9HVJ1_PSEAE			>tr|Q9HVJ1|Q9HVJ1_PSEAE Probable ATP-binding component of ABC transporter OS=Pseudomonas aeruginosa (strain ATCC 15692 / PAO1 / 1C / PRS 101 / LMG 12228) GN=PA4595 PE=4 SV=1	1	1	1
	tr|Q9HVY6|Q9HVY6_PSEAE			>tr|Q9HVY6|Q9HVY6_PSEAE Probable cytochrome c1 OS=Pseudomonas aeruginosa (strain ATCC 15692 / PAO1 / 1C / PRS 101 / LMG 12228) GN=PA4429 PE=4 SV=1	1	1	1
	tr|Q9HW49|Q9HW49_PSEAE			>tr|Q9HW49|Q9HW49_PSEAE Uncharacterized protein OS=Pseudomonas aeruginosa (strain ATCC 15692 / PAO1 / 1C / PRS 101 / LMG 12228) GN=PA4352 PE=3 SV=1	1	7	7
	tr|Q9HWQ0|Q9HWQ0_PSEAE			>tr|Q9HWQ0|Q9HWQ0_PSEAE Probable iron-sulfur protein OS=Pseudomonas aeruginosa (strain ATCC 15692 / PAO1 / 1C / PRS 101 / LMG 12228) GN=PA4131 PE=4 SV=1	1	2	2
	tr|Q9HWV0|Q9HWV0_PSEAE			>tr|Q9HWV0|Q9HWV0_PSEAE Probable nonribosomal peptide synthetase OS=Pseudomonas aeruginosa (strain ATCC 15692 / PAO1 / 1C / PRS 101 / LMG 12228) GN=PA4078 PE=4 SV=1	1	1	1
	tr|Q9I2C4|Q9I2C4_PSEAE;tr|Q9HX05|Q9HX05_PSEAE			>tr|Q9I2C4|Q9I2C4_PSEAE NAD+ dependent aldehyde dehydrogenase ExaC OS=Pseudomonas aeruginosa (strain ATCC 15692 / PAO1 / 1C / PRS 101 / LMG 12228) GN=exaC PE=3 SV=1;>tr|Q9HX05|Q9HX05_PSEAE Probable aldehyde dehydrogenase OS=Pseudomonas aeruginosa (strain A	2	2	2
	tr|Q9HXM5|Q9HXM5_PSEAE			>tr|Q9HXM5|Q9HXM5_PSEAE Inosine-5-monophosphate dehydrogenase OS=Pseudomonas aeruginosa (strain ATCC 15692 / PAO1 / 1C / PRS 101 / LMG 12228) GN=guaB PE=1 SV=1	1	1	1
	tr|Q9HXU8|Q9HXU8_PSEAE			>tr|Q9HXU8|Q9HXU8_PSEAE Lipotoxon F, LptF OS=Pseudomonas aeruginosa (strain ATCC 15692 / PAO1 / 1C / PRS 101 / LMG 12228) GN=lptF PE=3 SV=1	1	1	1
	tr|Q9HY81|Q9HY81_PSEAE			>tr|Q9HY81|Q9HY81_PSEAE Probable peroxidase OS=Pseudomonas aeruginosa (strain ATCC 15692 / PAO1 / 1C / PRS 101 / LMG 12228) GN=PA3529 PE=1 SV=1	1	6	6
	tr|Q9HYT5|Q9HYT5_PSEAE			>tr|Q9HYT5|Q9HYT5_PSEAE Uncharacterized protein OS=Pseudomonas aeruginosa (strain ATCC 15692 / PAO1 / 1C / PRS 101 / LMG 12228) GN=PA3309 PE=3 SV=1	1	6	6
	tr|Q9HYZ6|Q9HYZ6_PSEAE			>tr|Q9HYZ6|Q9HYZ6_PSEAE Site-determining protein OS=Pseudomonas aeruginosa (strain ATCC 15692 / PAO1 / 1C / PRS 101 / LMG 12228) GN=minD PE=3 SV=1	1	2	2
	tr|Q9HZK4|Q9HZK4_PSEAE			>tr|Q9HZK4|Q9HZK4_PSEAE Glyceraldehyde-3-phosphate dehydrogenase OS=Pseudomonas aeruginosa (strain ATCC 15692 / PAO1 / 1C / PRS 101 / LMG 12228) GN=PA3001 PE=3 SV=1	1	3	3
	tr|Q9I028|Q9I028_PSEAE			>tr|Q9I028|Q9I028_PSEAE Probable acyl-CoA dehydrogenase OS=Pseudomonas aeruginosa (strain ATCC 15692 / PAO1 / 1C / PRS 101 / LMG 12228) GN=PA2815 PE=4 SV=1	1	3	3
	tr|Q9I056|Q9I056_PSEAE			>tr|Q9I056|Q9I056_PSEAE Carboxypeptidase G2 OS=Pseudomonas aeruginosa (strain ATCC 15692 / PAO1 / 1C / PRS 101 / LMG 12228) GN=cpg2 PE=4 SV=1	1	1	1
	tr|Q9I0L5|Q9I0L5_PSEAE			>tr|Q9I0L5|Q9I0L5_PSEAE Isocitrate dehydrogenase [NADP] OS=Pseudomonas aeruginosa (strain ATCC 15692 / PAO1 / 1C / PRS 101 / LMG 12228) GN=icd PE=3 SV=1	1	11	11
	tr|Q9I0T1|Q9I0T1_PSEAE			>tr|Q9I0T1|Q9I0T1_PSEAE Probable acyl-CoA thiolase OS=Pseudomonas aeruginosa (strain ATCC 15692 / PAO1 / 1C / PRS 101 / LMG 12228) GN=PA2553 PE=3 SV=1	1	4	4
	tr|Q9I0Z9|Q9I0Z9_PSEAE			>tr|Q9I0Z9|Q9I0Z9_PSEAE Uncharacterized protein OS=Pseudomonas aeruginosa (strain ATCC 15692 / PAO1 / 1C / PRS 101 / LMG 12228) GN=PA2483 PE=4 SV=1	1	2	2
	tr|Q9I1E7|Q9I1E7_PSEAE			>tr|Q9I1E7|Q9I1E7_PSEAE Alkyl hydroperoxide reductase AhpD OS=Pseudomonas aeruginosa (strain ATCC 15692 / PAO1 / 1C / PRS 101 / LMG 12228) GN=PA2331 PE=3 SV=1	1	4	4
	tr|Q9I1E8|Q9I1E8_PSEAE			>tr|Q9I1E8|Q9I1E8_PSEAE Uncharacterized protein OS=Pseudomonas aeruginosa (strain ATCC 15692 / PAO1 / 1C / PRS 101 / LMG 12228) GN=PA2330 PE=4 SV=1	1	2	2
	tr|Q9I1H5|Q9I1H5_PSEAE			>tr|Q9I1H5|Q9I1H5_PSEAE Chitinase OS=Pseudomonas aeruginosa (strain ATCC 15692 / PAO1 / 1C / PRS 101 / LMG 12228) GN=chiC PE=3 SV=1	1	6	6
	tr|Q9I1W0|Q9I1W0_PSEAE			>tr|Q9I1W0|Q9I1W0_PSEAE Cardiolipin synthase B OS=Pseudomonas aeruginosa (strain ATCC 15692 / PAO1 / 1C / PRS 101 / LMG 12228) GN=clsB PE=3 SV=1	1	1	1
	tr|Q9I246|Q9I246_PSEAE			>tr|Q9I246|Q9I246_PSEAE Probable carbamoyl transferase OS=Pseudomonas aeruginosa (strain ATCC 15692 / PAO1 / 1C / PRS 101 / LMG 12228) GN=PA2069 PE=4 SV=1	1	9	9
	tr|Q9I299|Q9I299_PSEAE			>tr|Q9I299|Q9I299_PSEAE Methylcrotonyl-CoA carboxylase, alpha-subunit (Biotin-containing) OS=Pseudomonas aeruginosa (strain ATCC 15692 / PAO1 / 1C / PRS 101 / LMG 12228) GN=liuD PE=1 SV=1	1	8	8
	tr|Q9I2A6|Q9I2A6_PSEAE			>tr|Q9I2A6|Q9I2A6_PSEAE 3-hydroxybutyrate dehydrogenase OS=Pseudomonas aeruginosa (strain ATCC 15692 / PAO1 / 1C / PRS 101 / LMG 12228) GN=bdhA PE=3 SV=1	1	1	1
	tr|Q9I2A9|Q9I2A9_PSEAE			>tr|Q9I2A9|Q9I2A9_PSEAE DhcB, dehydrocarnitine CoA transferase, subunit B OS=Pseudomonas aeruginosa (strain ATCC 15692 / PAO1 / 1C / PRS 101 / LMG 12228) GN=dhcB PE=4 SV=1	1	1	1
	tr|Q9I2R2|Q9I2R2_PSEAE			>tr|Q9I2R2|Q9I2R2_PSEAE Probable oxidoreductase OS=Pseudomonas aeruginosa (strain ATCC 15692 / PAO1 / 1C / PRS 101 / LMG 12228) GN=PA1833 PE=4 SV=1	1	2	2
	tr|Q9I2V3|Q9I2V3_PSEAE			>tr|Q9I2V3|Q9I2V3_PSEAE Uncharacterized protein OS=Pseudomonas aeruginosa (strain ATCC 15692 / PAO1 / 1C / PRS 101 / LMG 12228) GN=PA1789 PE=1 SV=1	1	3	3
	tr|Q9I2W9|Q9I2W9_PSEAE			>tr|Q9I2W9|Q9I2W9_PSEAE Phosphoenolpyruvate synthase OS=Pseudomonas aeruginosa (strain ATCC 15692 / PAO1 / 1C / PRS 101 / LMG 12228) GN=ppsA PE=3 SV=1	1	3	3
	tr|Q9I3B2|Q9I3B2_PSEAE			>tr|Q9I3B2|Q9I3B2_PSEAE Beta-ketoacyl-ACP synthase I OS=Pseudomonas aeruginosa (strain ATCC 15692 / PAO1 / 1C / PRS 101 / LMG 12228) GN=fabB PE=3 SV=1	1	2	2
	tr|Q9I3D3|Q9I3D3_PSEAE			>tr|Q9I3D3|Q9I3D3_PSEAE 2-oxoglutarate dehydrogenase (E1 subunit) OS=Pseudomonas aeruginosa (strain ATCC 15692 / PAO1 / 1C / PRS 101 / LMG 12228) GN=sucA PE=4 SV=1	1	3	3
	tr|Q9I3D4|Q9I3D4_PSEAE			>tr|Q9I3D4|Q9I3D4_PSEAE Succinate dehydrogenase (B subunit) OS=Pseudomonas aeruginosa (strain ATCC 15692 / PAO1 / 1C / PRS 101 / LMG 12228) GN=sdhB PE=4 SV=1	1	3	3
	tr|Q9I3D5|Q9I3D5_PSEAE			>tr|Q9I3D5|Q9I3D5_PSEAE Succinate dehydrogenase flavoprotein subunit OS=Pseudomonas aeruginosa (strain ATCC 15692 / PAO1 / 1C / PRS 101 / LMG 12228) GN=sdhA PE=3 SV=1	1	4	4
	tr|Q9I3G0|Q9I3G0_PSEAE			>tr|Q9I3G0|Q9I3G0_PSEAE Cytochrome c oxidase, cbb3-type, CcoN subunit OS=Pseudomonas aeruginosa (strain ATCC 15692 / PAO1 / 1C / PRS 101 / LMG 12228) GN=ccoN2 PE=3 SV=1	1	1	1
	tr|Q9I3G1|Q9I3G1_PSEAE			>tr|Q9I3G1|Q9I3G1_PSEAE Cytochrome c oxidase, cbb3-type, CcoO subunit OS=Pseudomonas aeruginosa (strain ATCC 15692 / PAO1 / 1C / PRS 101 / LMG 12228) GN=ccoO2 PE=4 SV=1	1	1	1
	tr|Q9I3G6|Q9I3G6_PSEAE			>tr|Q9I3G6|Q9I3G6_PSEAE Probable ferredoxin OS=Pseudomonas aeruginosa (strain ATCC 15692 / PAO1 / 1C / PRS 101 / LMG 12228) GN=PA1551 PE=4 SV=1	1	1	1
	tr|Q9I402|Q9I402_PSEAE			>tr|Q9I402|Q9I402_PSEAE Probable binding protein component of ABC transporter OS=Pseudomonas aeruginosa (strain ATCC 15692 / PAO1 / 1C / PRS 101 / LMG 12228) GN=PA1342 PE=4 SV=1	1	1	1
	tr|Q9I585|Q9I585_PSEAE			>tr|Q9I585|Q9I585_PSEAE Uncharacterized protein OS=Pseudomonas aeruginosa (strain ATCC 15692 / PAO1 / 1C / PRS 101 / LMG 12228) GN=PA0856 PE=1 SV=1	1	1	1
	tr|Q9I5E3|Q9I5E3_PSEAE			>tr|Q9I5E3|Q9I5E3_PSEAE Citrate synthase OS=Pseudomonas aeruginosa (strain ATCC 15692 / PAO1 / 1C / PRS 101 / LMG 12228) GN=prpC PE=3 SV=1	1	1	1
	tr|Q9I5P0|Q9I5P0_PSEAE			>tr|Q9I5P0|Q9I5P0_PSEAE Probable type II secretion system protein OS=Pseudomonas aeruginosa (strain ATCC 15692 / PAO1 / 1C / PRS 101 / LMG 12228) GN=PA0685 PE=3 SV=1	1	1	1
	tr|Q9I5U9|Q9I5U9_PSEAE			>tr|Q9I5U9|Q9I5U9_PSEAE Uncharacterized protein OS=Pseudomonas aeruginosa (strain ATCC 15692 / PAO1 / 1C / PRS 101 / LMG 12228) GN=PA0588 PE=4 SV=1	1	8	8
	tr|Q9I659|Q9I659_PSEAE;sp|Q9HVN5|CLPB_PSEAE			>tr|Q9I659|Q9I659_PSEAE Probable ClpA/B protease ATP binding subunit OS=Pseudomonas aeruginosa (strain ATCC 15692 / PAO1 / 1C / PRS 101 / LMG 12228) GN=PA0459 PE=4 SV=1	2	5	5
	tr|Q9I689|Q9I689_PSEAE			>tr|Q9I689|Q9I689_PSEAE ATP-dependent RNA helicase RhlE OS=Pseudomonas aeruginosa (strain ATCC 15692 / PAO1 / 1C / PRS 101 / LMG 12228) GN=rhlE PE=3 SV=1	1	1	1
	tr|Q9I6H5|Q9I6H5_PSEAE			>tr|Q9I6H5|Q9I6H5_PSEAE D-3-phosphoglycerate dehydrogenase OS=Pseudomonas aeruginosa (strain ATCC 15692 / PAO1 / 1C / PRS 101 / LMG 12228) GN=serA PE=3 SV=1	1	3	3
	tr|Q9I6J2|Q9I6J2_PSEAE			>tr|Q9I6J2|Q9I6J2_PSEAE Putrescine aminotransferase OS=Pseudomonas aeruginosa (strain ATCC 15692 / PAO1 / 1C / PRS 101 / LMG 12228) GN=spuC PE=3 SV=1	1	1	1
	tr|Q9I6Z3|Q9I6Z3_PSEAE			>tr|Q9I6Z3|Q9I6Z3_PSEAE Alkyl hydroperoxide reductase subunit C OS=Pseudomonas aeruginosa (strain ATCC 15692 / PAO1 / 1C / PRS 101 / LMG 12228) GN=ahpC PE=4 SV=1	1	7	7
	tr|Q9I3B2|Q9I3B2_PSEAE			>tr|Q9I3B2|Q9I3B2_PSEAE Beta-ketoacyl-ACP synthase I OS=Pseudomonas aeruginosa (strain ATCC 15692 / PAO1 / 1C / PRS 101 / LMG 12228) GN=fabB PE=3 SV=1	1	2	2
	tr|Q9I3D3|Q9I3D3_PSEAE			>tr|Q9I3D3|Q9I3D3_PSEAE 2-oxoglutarate dehydrogenase (E1 subunit) OS=Pseudomonas aeruginosa (strain ATCC 15692 / PAO1 / 1C / PRS 101 / LMG 12228) GN=sucA PE=4 SV=1	1	7	7
	tr|Q9I3D4|Q9I3D4_PSEAE			>tr|Q9I3D4|Q9I3D4_PSEAE Succinate dehydrogenase (B subunit) OS=Pseudomonas aeruginosa (strain ATCC 15692 / PAO1 / 1C / PRS 101 / LMG 12228) GN=sdhB PE=4 SV=1	1	4	4
	tr|Q9I3D5|Q9I3D5_PSEAE			>tr|Q9I3D5|Q9I3D5_PSEAE Succinate dehydrogenase flavoprotein subunit OS=Pseudomonas aeruginosa (strain ATCC 15692 / PAO1 / 1C / PRS 101 / LMG 12228) GN=sdhA PE=3 SV=1	1	9	9
	tr|Q9I3G0|Q9I3G0_PSEAE			>tr|Q9I3G0|Q9I3G0_PSEAE Cytochrome c oxidase, cbb3-type, CcoN subunit OS=Pseudomonas aeruginosa (strain ATCC 15692 / PAO1 / 1C / PRS 101 / LMG 12228) GN=ccoN2 PE=3 SV=1	1	2	2
	tr|Q9I3G2|Q9I3G2_PSEAE			>tr|Q9I3G2|Q9I3G2_PSEAE Cbb3-type cytochrome c oxidase subunit OS=Pseudomonas aeruginosa (strain ATCC 15692 / PAO1 / 1C / PRS 101 / LMG 12228) GN=ccoP2 PE=3 SV=1	1	2	2
	tr|Q9I3G3|Q9I3G3_PSEAE			>tr|Q9I3G3|Q9I3G3_PSEAE Cytochrome c oxidase, cbb3-type, CcoN subunit OS=Pseudomonas aeruginosa (strain ATCC 15692 / PAO1 / 1C / PRS 101 / LMG 12228) GN=ccoN1 PE=3 SV=1	1	1	1
	tr|Q9I3G6|Q9I3G6_PSEAE			>tr|Q9I3G6|Q9I3G6_PSEAE Probable ferredoxin OS=Pseudomonas aeruginosa (strain ATCC 15692 / PAO1 / 1C / PRS 101 / LMG 12228) GN=PA1551 PE=4 SV=1	1	3	3
	tr|Q9I4I1|Q9I4I1_PSEAE			>tr|Q9I4I1|Q9I4I1_PSEAE Ribonucleoside-diphosphate reductase OS=Pseudomonas aeruginosa (strain ATCC 15692 / PAO1 / 1C / PRS 101 / LMG 12228) GN=nrdA PE=3 SV=1	1	1	1
	tr|Q9I5E3|Q9I5E3_PSEAE			>tr|Q9I5E3|Q9I5E3_PSEAE Citrate synthase OS=Pseudomonas aeruginosa (strain ATCC 15692 / PAO1 / 1C / PRS 101 / LMG 12228) GN=prpC PE=3 SV=1	1	2	2
	tr|Q9I5F6|Q9I5F6_PSEAE			>tr|Q9I5F6|Q9I5F6_PSEAE Bifunctional protein PutA OS=Pseudomonas aeruginosa (strain ATCC 15692 / PAO1 / 1C / PRS 101 / LMG 12228) GN=putA PE=3 SV=1	1	1	1
	tr|Q9I5U9|Q9I5U9_PSEAE			>tr|Q9I5U9|Q9I5U9_PSEAE Uncharacterized protein OS=Pseudomonas aeruginosa (strain ATCC 15692 / PAO1 / 1C / PRS 101 / LMG 12228) GN=PA0588 PE=4 SV=1	1	13	13
	tr|Q9I5Y8|Q9I5Y8_PSEAE			>tr|Q9I5Y8|Q9I5Y8_PSEAE Transketolase OS=Pseudomonas aeruginosa (strain ATCC 15692 / PAO1 / 1C / PRS 101 / LMG 12228) GN=tktA PE=1 SV=1	1	2	2
	tr|Q9I612|Q9I612_PSEAE			>tr|Q9I612|Q9I612_PSEAE Probable acyl-CoA dehydrogenase OS=Pseudomonas aeruginosa (strain ATCC 15692 / PAO1 / 1C / PRS 101 / LMG 12228) GN=PA0506 PE=3 SV=1	1	2	2
	tr|Q9I625|Q9I625_PSEAE			>tr|Q9I625|Q9I625_PSEAE Probable biotin-requiring enzyme OS=Pseudomonas aeruginosa (strain ATCC 15692 / PAO1 / 1C / PRS 101 / LMG 12228) GN=PA0493 PE=4 SV=1	1	1	1
	tr|Q9I659|Q9I659_PSEAE;sp|Q9HVN5|CLPB_PSEAE			>tr|Q9I659|Q9I659_PSEAE Probable ClpA/B protease ATP binding subunit OS=Pseudomonas aeruginosa (strain ATCC 15692 / PAO1 / 1C / PRS 101 / LMG 12228) GN=PA0459 PE=4 SV=1	2	7	7
	tr|Q9I671|Q9I671_PSEAE			>tr|Q9I671|Q9I671_PSEAE Glutaryl-CoA dehydrogenase OS=Pseudomonas aeruginosa (strain ATCC 15692 / PAO1 / 1C / PRS 101 / LMG 12228) GN=gcdH PE=3 SV=1	1	2	2
	tr|Q9I689|Q9I689_PSEAE			>tr|Q9I689|Q9I689_PSEAE ATP-dependent RNA helicase RhlE OS=Pseudomonas aeruginosa (strain ATCC 15692 / PAO1 / 1C / PRS 101 / LMG 12228) GN=rhlE PE=3 SV=1	1	1	1
	tr|Q9I6A0|Q9I6A0_PSEAE			>tr|Q9I6A0|Q9I6A0_PSEAE Probable cystathionine gamma-lyase OS=Pseudomonas aeruginosa (strain ATCC 15692 / PAO1 / 1C / PRS 101 / LMG 12228) GN=PA0400 PE=3 SV=1	1	2	2
	tr|Q9I6H5|Q9I6H5_PSEAE			>tr|Q9I6H5|Q9I6H5_PSEAE D-3-phosphoglycerate dehydrogenase OS=Pseudomonas aeruginosa (strain ATCC 15692 / PAO1 / 1C / PRS 101 / LMG 12228) GN=serA PE=3 SV=1	1	3	3
	tr|Q9I6J2|Q9I6J2_PSEAE			>tr|Q9I6J2|Q9I6J2_PSEAE Putrescine aminotransferase OS=Pseudomonas aeruginosa (strain ATCC 15692 / PAO1 / 1C / PRS 101 / LMG 12228) GN=spuC PE=3 SV=1	1	2	2
	tr|Q9I6J5|Q9I6J5_PSEAE			>tr|Q9I6J5|Q9I6J5_PSEAE Probable glutamine synthetase OS=Pseudomonas aeruginosa (strain ATCC 15692 / PAO1 / 1C / PRS 101 / LMG 12228) GN=spuI PE=3 SV=1	1	1	1
	tr|Q9I6Z3|Q9I6Z3_PSEAE			>tr|Q9I6Z3|Q9I6Z3_PSEAE Alkyl hydroperoxide reductase subunit C OS=Pseudomonas aeruginosa (strain ATCC 15692 / PAO1 / 1C / PRS 101 / LMG 12228) GN=ahpC PE=4 SV=1	1	7	7
	tr|Q9I762|Q9I762_PSEAE			>tr|Q9I762|Q9I762_PSEAE Uncharacterized protein OS=Pseudomonas aeruginosa (strain ATCC 15692 / PAO1 / 1C / PRS 101 / LMG 12228) GN=PA0070 PE=4 SV=1	1	1	1
	tr|Q9I765|Q9I765_PSEAE			>tr|Q9I765|Q9I765_PSEAE Oligopeptidase A OS=Pseudomonas aeruginosa (strain ATCC 15692 / PAO1 / 1C / PRS 101 / LMG 12228) GN=prlC PE=3 SV=1	1	1	1

## Sheet: 7-2 proteinGroups C4HSL-1 
Protein IDs	Majority protein IDs	Peptide counts (all)	Peptide counts (razor+unique)	Peptide counts (unique)	Fasta headers	Number of proteins	Peptides	Razor + unique peptides	Unique peptides	Sequence coverage [%]	Unique + razor sequence coverage [%]	Unique sequence coverage [%]	Mol. weight [kDa]	Sequence length	Sequence lengths	Q-value	Score	Intensity	MS/MS Count	Only identified by site	Reverse	Potential contaminant	id	Peptide IDs	Peptide is razor	Mod. peptide IDs	Evidence IDs	MS/MS IDs	Best MS/MS	Oxidation (M) site IDs	Oxidation (M) site positions
CON__P00761	CON__P00761	4	4	4	>P00761 SWISS-PROT:P00761|TRYP_PIG Trypsin - Sus scrofa (Pig).	1	4	4	4	25.1	25.1	25.1	24.409	231	231	0	52.609	804970000	87			+	0	121;148;168;257	True;True;True;True	125;126;153;173;269	195;196;197;269;270;271;272;303;304;500;501	408;409;410;411;412;413;414;415;416;417;603;604;605;606;607;608;609;610;611;612;613;614;615;616;617;618;619;620;621;622;623;624;625;626;627;628;629;700;701;702;703;704;705;706;707;708;709;710;711;1314;1315;1316;1317;1318;1319;1320;1321;1322;1323;1324;1325;1326;1327;1328;1329;1330;1331;1332;1333;1334;1335;1336;1337;1338;1339;1340;1341;1342;1343;1344;1345;1346;1347;1348;1349;1350;1351	413;627;706;1340	0	94
CON__P02535-1;CON__P13645	CON__P02535-1;CON__P13645	1;1	1;1	1;1	>P02535-1 SWISS-PROT:P02535-1 Tax_Id=10090 Gene_Symbol=Krt10 Isoform 1 of Keratin, type I cytoskeletal 10;>P13645 SWISS-PROT:P13645 Tax_Id=9606 Gene_Symbol=KRT10 Keratin, type I cytoskeletal 10	2	1	1	1	1.6	1.6	1.6	57.769	570	570;593	0	6.7648	1026400	2			+	1	145	TRUE	150	265	598;599	599
CON__P04264;CON__Q9R0H5;CON__Q6NXH9;CON__Q8BGZ7;CON__P50446;CON__Q6IFZ6;CON__Q7Z794;CON__Q922U2;CON__Q5XQN5;CON__ENSEMBL:ENSBTAP00000038253;CON__P35908	CON__P04264	4;1;1;1;1;1;1;1;1;1;1	4;1;1;1;1;1;1;1;1;1;1	4;1;1;1;1;1;1;1;1;1;1	>P04264 SWISS-PROT:P04264 Tax_Id=9606 Gene_Symbol=KRT1 Keratin, type II cytoskeletal 1	11	4	4	4	6.5	6.5	6.5	66.017	644	644;524;539;551;553;572;578;580;601;606;645	0	56.508	8657600	11			+	2	77;220;222;297	True;True;True;True	79;230;232;310	127;128;436;438;439;585	276;277;278;279;280;281;1078;1081;1082;1083;1635	277;1078;1082;1635
CON__Q28107	CON__Q28107	1	1	1	>Q28107 SWISS-PROT:Q28107 (Bos taurus) Coagulation factor V precursor	1	1	1	1	0.6	0.6	0.6	248.98	2211	2211	0	5.5939	1508500	2			+	3	234	TRUE	246	466	1209;1210	1210
CON__Streptavidin	CON__Streptavidin	5	5	5	>Streptavidin (S.avidinii)	1	5	5	5	43.1	43.1	43.1	16.622	160	160	0	119.62	2867600000	508			+	4	127;128;185;228;296	True;True;True;True;True	132;133;193;239;309	207;208;209;210;211;212;213;214;215;216;217;218;219;220;221;222;223;224;225;226;227;228;229;230;231;232;233;234;235;236;237;340;341;342;343;344;345;346;347;348;349;350;351;352;353;354;355;356;357;358;359;360;361;362;363;364;365;366;367;368;369;370;371;372;373;374;375;376;450;451;452;453;571;572;573;574;575;576;577;578;579;580;581;582;583;584	430;431;432;433;434;435;436;437;438;439;440;441;442;443;444;445;446;447;448;449;450;451;452;453;454;455;456;457;458;459;460;461;462;463;464;465;466;467;468;469;470;471;472;473;474;475;476;477;478;479;480;481;482;483;484;485;486;487;488;489;490;491;492;493;494;495;496;497;498;499;500;501;502;503;504;505;506;507;508;509;510;511;512;513;514;515;516;517;518;519;520;521;522;523;524;525;526;527;528;529…	492;551;826;1150;1501
sp|O52759|RS4_PSEAE	sp|O52759|RS4_PSEAE	2	2	2	>sp|O52759|RS4_PSEAE 30S ribosomal protein S4 OS=Pseudomonas aeruginosa (strain ATCC 15692 / PAO1 / 1C / PRS 101 / LMG 12228) GN=rpsD PE=3 SV=2	1	2	2	2	12.6	12.6	12.6	23.277	206	206	0	24.191	3048100	4				5	19;166	True;True	20;171	33;300;301	109;110;697;698	109;697
sp|O52762|CATA_PSEAE	sp|O52762|CATA_PSEAE	3	3	3	>sp|O52762|CATA_PSEAE Catalase OS=Pseudomonas aeruginosa (strain ATCC 15692 / PAO1 / 1C / PRS 101 / LMG 12228) GN=katA PE=1 SV=1	1	3	3	3	9.1	9.1	9.1	55.588	482	482	0	40.167	8081300	6				6	96;146;170	True;True;True	98;151;175	156;266;267;308;309	326;327;600;601;720;721	326;600;720	1	30
sp|O54439|ACP1_PSEAE	sp|O54439|ACP1_PSEAE	1	1	1	>sp|O54439|ACP1_PSEAE Acyl carrier protein 1 OS=Pseudomonas aeruginosa (strain ATCC 15692 / PAO1 / 1C / PRS 101 / LMG 12228) GN=acpP1 PE=3 SV=4	1	1	1	1	20.5	20.5	20.5	8.7406	78	78	0	10.334	847020	3				7	131	TRUE	136	241;242	556;557;558	557
sp|O68822|AMPA_PSEAE	sp|O68822|AMPA_PSEAE	11	11	11	>sp|O68822|AMPA_PSEAE Cytosol aminopeptidase OS=Pseudomonas aeruginosa (strain ATCC 15692 / PAO1 / 1C / PRS 101 / LMG 12228) GN=pepA PE=3 SV=1	1	11	11	11	28.9	28.9	28.9	52.331	495	495	0	102.74	35448000	29				8	42;43;65;71;81;91;142;156;159;237;261	True;True;True;True;True;True;True;True;True;True;True	43;44;67;73;83;93;147;161;164;249;273	67;68;69;70;109;110;118;133;149;260;261;285;286;290;291;473;508;509	170;171;172;173;174;253;254;255;265;266;287;288;316;317;593;594;672;673;674;675;676;681;682;683;684;685;1253;1362;1363;1364	172;173;255;265;287;316;594;674;681;1253;1362	2;3	182;230
sp|Q9S508|PHZB2_PSEAE;sp|O69753|PHZB1_PSEAE	sp|Q9S508|PHZB2_PSEAE;sp|O69753|PHZB1_PSEAE	1;1	1;1	1;1	>sp|Q9S508|PHZB2_PSEAE Phenazine biosynthesis protein PhzB 2 OS=Pseudomonas aeruginosa (strain ATCC 15692 / PAO1 / 1C / PRS 101 / LMG 12228) GN=phzB2 PE=1 SV=1;>sp|O69753|PHZB1_PSEAE Phenazine biosynthesis protein PhzB 1 OS=Pseudomonas aeruginosa (strain A	2	1	1	1	6.2	6.2	6.2	19.027	162	162;162	0	6.2251	3092400	2				9	27	TRUE	28	44;45	127;128	128
sp|P04739|FMPO_PSEAE	sp|P04739|FMPO_PSEAE	2	2	2	>sp|P04739|FMPO_PSEAE Fimbrial protein OS=Pseudomonas aeruginosa (strain ATCC 15692 / PAO1 / 1C / PRS 101 / LMG 12228) GN=pilA PE=1 SV=1	1	2	2	2	15.4	15.4	15.4	15.512	149	149	0	19.285	5392700	5				10	215;252	True;True	225;264	429;430;494	1069;1070;1071;1072;1304	1072;1304
sp|P05384|DBHB_PSEAE	sp|P05384|DBHB_PSEAE	1	1	1	>sp|P05384|DBHB_PSEAE DNA-binding protein HU-beta OS=Pseudomonas aeruginosa (strain ATCC 15692 / PAO1 / 1C / PRS 101 / LMG 12228) GN=hupB PE=1 SV=3	1	1	1	1	15.6	15.6	15.6	9.0865	90	90	0	13.09	4481300	4				11	21	TRUE	22	36;37	113;114;115;116	116
sp|P08308|OTCC_PSEAE	sp|P08308|OTCC_PSEAE	6	6	6	>sp|P08308|OTCC_PSEAE Ornithine carbamoyltransferase, catabolic OS=Pseudomonas aeruginosa (strain ATCC 15692 / PAO1 / 1C / PRS 101 / LMG 12228) GN=arcB PE=1 SV=3	1	6	6	6	17.3	17.3	17.3	38.108	336	336	0	38.337	17587000	11				12	72;184;191;193;203;303	True;True;True;True;True;True	74;192;199;201;211;316	119;120;339;386;387;390;391;408;598	267;268;269;792;995;996;1000;1001;1002;1033;1658	269;792;995;1002;1033;1658	4;5;6;7	101;169;258;261
sp|P09591|EFTU_PSEAE	sp|P09591|EFTU_PSEAE	12	12	12	>sp|P09591|EFTU_PSEAE Elongation factor Tu OS=Pseudomonas aeruginosa (strain ATCC 15692 / PAO1 / 1C / PRS 101 / LMG 12228) GN=tufA PE=1 SV=2	1	12	12	12	41.6	41.6	41.6	43.369	397	397	0	119.84	176760000	99				13	14;17;49;55;90;103;171;183;208;250;254;279	True;True;True;True;True;True;True;True;True;True;True;True	14;17;18;50;56;92;106;176;189;190;191;216;262;266;291	25;26;29;30;31;78;79;88;89;145;146;147;148;167;168;310;311;330;331;332;333;334;335;336;337;338;414;415;491;492;496;542;543	78;79;80;81;82;83;84;85;86;87;93;94;95;96;97;98;99;100;101;102;103;104;105;106;107;184;185;196;197;198;199;200;201;202;305;306;307;308;309;310;311;312;313;314;315;361;362;363;364;365;366;367;722;723;724;725;726;727;728;729;771;772;773;774;775;776;777;778;779;780;781;782;783;784;785;786;787;788;789;790;791;1040;1041;1042;1043;1044;1300;1301;1306;1426;1427;1428;1429;1430;1431;1432;1433;1434;1435	80;96;185;196;309;362;728;783;1042;1300;1306;1427	8;9;10;11	177;216;362;372
sp|P11221|OPRI_PSEAE	sp|P11221|OPRI_PSEAE	1	1	1	>sp|P11221|OPRI_PSEAE Major outer membrane lipoprotein OS=Pseudomonas aeruginosa (strain ATCC 15692 / PAO1 / 1C / PRS 101 / LMG 12228) GN=oprI PE=3 SV=1	1	1	1	1	12	12	12	8.8348	83	83	0	11.366	1383500	8				14	169	TRUE	174	305;306;307	712;713;714;715;716;717;718;719	713
sp|P13794|PORF_PSEAE	sp|P13794|PORF_PSEAE	5	5	5	>sp|P13794|PORF_PSEAE Outer membrane porin F OS=Pseudomonas aeruginosa (strain ATCC 15692 / PAO1 / 1C / PRS 101 / LMG 12228) GN=oprF PE=1 SV=1	1	5	5	5	19.7	19.7	19.7	37.639	350	350	0	54.642	51102000	39				15	60;209;210;258;272	True;True;True;True;True	62;217;218;270;284	99;100;416;417;502;503;504;528;529;530;531	221;222;223;224;225;226;227;228;229;230;231;232;1045;1046;1047;1048;1049;1352;1353;1354;1355;1356;1357;1391;1392;1393;1394;1395;1396;1397;1398;1399;1400;1401;1402;1403;1404;1405;1406	229;1047;1049;1353;1398
sp|P13981|ARCA_PSEAE	sp|P13981|ARCA_PSEAE	14	14	14	>sp|P13981|ARCA_PSEAE Arginine deiminase OS=Pseudomonas aeruginosa (strain ATCC 15692 / PAO1 / 1C / PRS 101 / LMG 12228) GN=arcA PE=1 SV=2	1	14	14	14	36.4	36.4	36.4	46.435	418	418	0	123.04	58411000	49				16	52;56;68;74;129;133;196;200;204;233;239;240;264;291	True;True;True;True;True;True;True;True;True;True;True;True;True;True	53;57;70;76;134;138;204;208;212;245;251;252;276;304	83;84;90;91;113;114;123;238;239;244;245;394;395;401;402;409;464;465;476;477;478;479;514;564	191;192;203;204;205;258;259;260;272;553;554;561;562;1006;1007;1008;1009;1017;1018;1019;1020;1034;1206;1207;1208;1260;1261;1262;1263;1264;1265;1266;1267;1268;1269;1270;1271;1272;1273;1274;1275;1276;1277;1278;1279;1373;1484;1485;1486	192;204;260;272;553;562;1009;1017;1034;1206;1267;1273;1373;1485	12	316
sp|P13982|ARCC_PSEAE	sp|P13982|ARCC_PSEAE	1	1	1	>sp|P13982|ARCC_PSEAE Carbamate kinase OS=Pseudomonas aeruginosa (strain ATCC 15692 / PAO1 / 1C / PRS 101 / LMG 12228) GN=arcC PE=3 SV=1	1	1	1	1	5.5	5.5	5.5	33.08	310	310	0	7.8412	353940	1				17	48	TRUE	49	77	183	183
sp|P30718|CH60_PSEAE	sp|P30718|CH60_PSEAE	14	14	14	>sp|P30718|CH60_PSEAE 60 kDa chaperonin OS=Pseudomonas aeruginosa (strain ATCC 15692 / PAO1 / 1C / PRS 101 / LMG 12228) GN=groL PE=1 SV=3	1	14	14	14	39.9	39.9	39.9	57.085	547	547	0	119	60632000	41				18	4;15;25;30;31;40;41;53;73;83;138;179;205;216	True;True;True;True;True;True;True;True;True;True;True;True;True;True	4;15;26;31;32;41;42;54;75;85;143;185;213;226	8;9;27;41;42;48;49;50;51;52;65;66;85;86;121;122;135;255;324;325;410;411;431	41;42;43;44;45;46;47;48;88;89;90;123;124;131;132;133;134;135;136;137;138;139;140;141;142;143;144;168;169;193;194;270;271;291;588;760;761;762;763;764;1035;1036;1073	46;89;124;131;136;168;169;194;271;291;588;760;1035;1073	13;14;15;16;17;18;19	16;69;111;114;233;267;288
sp|P37799|BCCP_PSEAE	sp|P37799|BCCP_PSEAE	9	9	9	>sp|P37799|BCCP_PSEAE Biotin carboxyl carrier protein of acetyl-CoA carboxylase OS=Pseudomonas aeruginosa (strain ATCC 15692 / PAO1 / 1C / PRS 101 / LMG 12228) GN=accB PE=3 SV=1	1	9	9	9	62.8	62.8	62.8	16.455	156	156	0	111.6	1042000000	174				19	2;3;134;135;154;155;162;225;235	True;True;True;True;True;True;True;True;True	2;3;139;140;159;160;167;235;236;247	2;3;4;5;6;7;246;247;248;249;250;251;279;280;281;282;283;284;295;443;444;445;446;467;468;469;470;471	2;3;4;5;6;7;8;9;10;11;12;13;14;15;16;17;18;19;20;21;22;23;24;25;26;27;28;29;30;31;32;33;34;35;36;37;38;39;40;563;564;565;566;567;568;569;570;571;572;573;574;575;576;577;578;579;580;581;582;583;643;644;645;646;647;648;649;650;651;652;653;654;655;656;657;658;659;660;661;662;663;664;665;666;667;668;669;670;671;689;690;1087;1088;1089;1090;1091;1092;1093;1094;1095;1096;1097;1098;1099;1100;1101;1102;11…	21;37;564;569;644;657;689;1123;1247	20	87
sp|P43336|PHHC_PSEAE	sp|P43336|PHHC_PSEAE	2	2	2	>sp|P43336|PHHC_PSEAE Aromatic-amino-acid aminotransferase OS=Pseudomonas aeruginosa (strain ATCC 15692 / PAO1 / 1C / PRS 101 / LMG 12228) GN=phhC PE=3 SV=2	1	2	2	2	7.8	7.8	7.8	43.273	399	399	0	21.354	2756900	4				20	137;278	True;True	142;290	254;540;541	587;1423;1424;1425	587;1423
sp|P47204|FTSZ_PSEAE	sp|P47204|FTSZ_PSEAE	1	1	1	>sp|P47204|FTSZ_PSEAE Cell division protein FtsZ OS=Pseudomonas aeruginosa (strain ATCC 15692 / PAO1 / 1C / PRS 101 / LMG 12228) GN=ftsZ PE=1 SV=2	1	1	1	1	4.8	4.8	4.8	41.218	394	394	0	6.2904	169380	1				21	288	TRUE	301	560	1476	1476
sp|P53593|SUCC_PSEAE	sp|P53593|SUCC_PSEAE	9	9	9	>sp|P53593|SUCC_PSEAE Succinyl-CoA ligase [ADP-forming] subunit beta OS=Pseudomonas aeruginosa (strain ATCC 15692 / PAO1 / 1C / PRS 101 / LMG 12228) GN=sucC PE=3 SV=2	1	9	9	9	29.1	29.1	29.1	41.542	388	388	0	87.737	27843000	23				22	10;38;69;113;117;126;192;207;266	True;True;True;True;True;True;True;True;True	10;39;71;117;121;131;200;215;278	19;20;62;63;115;183;189;190;205;206;388;389;413;517;518;519;520	72;73;160;161;162;163;164;165;261;394;402;403;428;429;997;998;999;1039;1376;1377;1378;1379;1380;1381;1382	72;164;261;394;402;428;998;1039;1378
sp|P53641|SODF_PSEAE	sp|P53641|SODF_PSEAE	2	2	2	>sp|P53641|SODF_PSEAE Superoxide dismutase [Fe] OS=Pseudomonas aeruginosa (strain ATCC 15692 / PAO1 / 1C / PRS 101 / LMG 12228) GN=sodB PE=3 SV=3	1	2	2	2	13.5	13.5	13.5	21.351	193	193	0	17.613	8916500	5				23	11;248	True;True	11;260	21;22;488;489	74;75;1295;1296;1297	75;1295
sp|Q51561|RPOB_PSEAE	sp|Q51561|RPOB_PSEAE	3	3	3	>sp|Q51561|RPOB_PSEAE DNA-directed RNA polymerase subunit beta OS=Pseudomonas aeruginosa (strain ATCC 15692 / PAO1 / 1C / PRS 101 / LMG 12228) GN=rpoB PE=3 SV=2	1	3	3	3	4	4	4	150.84	1357	1357	0	24.534	1679200	5				24	16;23;227	True;True;True	16;24;238	28;39;449	91;92;120;121;1134	92;121;1134
sp|Q51567|SUCD_PSEAE	sp|Q51567|SUCD_PSEAE	3	3	3	>sp|Q51567|SUCD_PSEAE Succinyl-CoA ligase [ADP-forming] subunit alpha OS=Pseudomonas aeruginosa (strain ATCC 15692 / PAO1 / 1C / PRS 101 / LMG 12228) GN=sucD PE=3 SV=2	1	3	3	3	12.2	12.2	12.2	30.266	295	295	0	19.501	9364200	5				25	20;75;88	True;True;True	21;77;90	34;35;124;125;143	111;112;273;274;303	111;274;303
sp|Q59637|ODP1_PSEAE	sp|Q59637|ODP1_PSEAE	4	4	4	>sp|Q59637|ODP1_PSEAE Pyruvate dehydrogenase E1 component OS=Pseudomonas aeruginosa (strain ATCC 15692 / PAO1 / 1C / PRS 101 / LMG 12228) GN=aceE PE=3 SV=2	1	4	4	4	5.2	5.2	5.2	99.563	882	882	0	24.841	2754300	4				26	59;119;219;224	True;True;True;True	61;123;229;234	98;192;435;442	220;405;1077;1086	220;405;1077;1086	21	464
sp|Q9HT18|ATPA_PSEAE	sp|Q9HT18|ATPA_PSEAE	11	11	11	>sp|Q9HT18|ATPA_PSEAE ATP synthase subunit alpha OS=Pseudomonas aeruginosa (strain ATCC 15692 / PAO1 / 1C / PRS 101 / LMG 12228) GN=atpA PE=3 SV=1	1	11	11	11	25.1	25.1	25.1	55.393	514	514	0	89.428	29724000	30				27	66;86;122;180;187;229;230;236;262;286;287	True;True;True;True;True;True;True;True;True;True;True	68;88;127;186;195;240;241;242;248;274;299;300	111;140;141;198;199;200;326;327;379;380;454;455;456;457;458;459;460;472;510;511;557;558;559	256;300;301;418;419;420;765;766;767;768;986;987;988;1194;1195;1196;1197;1198;1199;1200;1201;1202;1252;1365;1366;1367;1368;1472;1473;1474;1475	256;301;419;767;988;1194;1198;1252;1367;1474;1475	22;23	1;157
sp|Q9HT20|ATPB_PSEAE	sp|Q9HT20|ATPB_PSEAE	4	4	4	>sp|Q9HT20|ATPB_PSEAE ATP synthase subunit beta OS=Pseudomonas aeruginosa (strain ATCC 15692 / PAO1 / 1C / PRS 101 / LMG 12228) GN=atpD PE=3 SV=1	1	4	4	4	12.7	12.7	12.7	49.499	458	458	0	24.798	2266600	4				28	94;206;260;306	True;True;True;True	96;214;272;319	153;412;507;601	321;1037;1038;1361;1661	321;1037;1361;1661
sp|Q9HU83|HUTU_PSEAE	sp|Q9HU83|HUTU_PSEAE	2	2	2	>sp|Q9HU83|HUTU_PSEAE Urocanate hydratase OS=Pseudomonas aeruginosa (strain ATCC 15692 / PAO1 / 1C / PRS 101 / LMG 12228) GN=hutU PE=1 SV=1	1	2	2	2	5.5	5.5	5.5	61.193	559	559	0	14.326	327700	3				29	18;270	True;True	19;282	32;525;526	108;1388;1389	108;1388	24	531
sp|Q9HV43|DNAK_PSEAE	sp|Q9HV43|DNAK_PSEAE	1	1	1	>sp|Q9HV43|DNAK_PSEAE Chaperone protein DnaK OS=Pseudomonas aeruginosa (strain ATCC 15692 / PAO1 / 1C / PRS 101 / LMG 12228) GN=dnaK PE=3 SV=1	1	1	1	1	3.5	3.5	3.5	68.402	637	637	0	5.6595	872000	2				30	251	TRUE	263	493	1302;1303	1303
sp|Q9HV59|PNP_PSEAE	sp|Q9HV59|PNP_PSEAE	1	1	1	>sp|Q9HV59|PNP_PSEAE Polyribonucleotide nucleotidyltransferase OS=Pseudomonas aeruginosa (strain ATCC 15692 / PAO1 / 1C / PRS 101 / LMG 12228) GN=pnp PE=3 SV=1	1	1	1	1	1.9	1.9	1.9	75.452	701	701	0	5.5719	778080	1				31	32	TRUE	33	53	145	145
sp|Q9HVA2|ILVC_PSEAE	sp|Q9HVA2|ILVC_PSEAE	1	1	1	>sp|Q9HVA2|ILVC_PSEAE Ketol-acid reductoisomerase OS=Pseudomonas aeruginosa (strain ATCC 15692 / PAO1 / 1C / PRS 101 / LMG 12228) GN=ilvC PE=1 SV=1	1	1	1	1	5.6	5.6	5.6	36.424	338	338	0	5.7941	445160	1				32	87	TRUE	89	142	302	302
sp|Q9HVY3|RS9_PSEAE	sp|Q9HVY3|RS9_PSEAE	1	1	1	>sp|Q9HVY3|RS9_PSEAE 30S ribosomal protein S9 OS=Pseudomonas aeruginosa (strain ATCC 15692 / PAO1 / 1C / PRS 101 / LMG 12228) GN=rpsI PE=3 SV=1	1	1	1	1	7.7	7.7	7.7	14.615	130	130	0	6.7804	353240	1				33	24	TRUE	25	40	122	122
sp|Q9HWC9|RPOC_PSEAE	sp|Q9HWC9|RPOC_PSEAE	3	3	3	>sp|Q9HWC9|RPOC_PSEAE DNA-directed RNA polymerase subunit beta OS=Pseudomonas aeruginosa (strain ATCC 15692 / PAO1 / 1C / PRS 101 / LMG 12228) GN=rpoC PE=3 SV=1	1	3	3	3	3.7	3.7	3.7	154.38	1399	1399	0	18.853	924530	3				34	54;118;152	True;True;True	55;122;157	87;191;277	195;404;641	195;404;641
sp|Q9HWD2|EFG1_PSEAE;sp|Q9I244|EFG2_PSEAE	sp|Q9HWD2|EFG1_PSEAE	10;3	10;3	10;3	>sp|Q9HWD2|EFG1_PSEAE Elongation factor G 1 OS=Pseudomonas aeruginosa (strain ATCC 15692 / PAO1 / 1C / PRS 101 / LMG 12228) GN=fusA PE=1 SV=1	2	10	10	10	21.4	21.4	21.4	77.784	706	706;702	0	73.75	17036000	16				35	9;13;37;93;102;141;151;190;293;295	True;True;True;True;True;True;True;True;True;True	9;13;38;95;105;146;156;198;306;308	17;18;24;61;151;152;166;258;259;276;385;567;568;570	70;71;77;159;319;320;358;359;360;591;592;640;994;1489;1490;1491;1493;1494	70;77;159;319;358;592;640;994;1490;1493	25;26;27;28	388;648;666;685
sp|Q9HWD8|RL2_PSEAE	sp|Q9HWD8|RL2_PSEAE	2	2	2	>sp|Q9HWD8|RL2_PSEAE 50S ribosomal protein L2 OS=Pseudomonas aeruginosa (strain ATCC 15692 / PAO1 / 1C / PRS 101 / LMG 12228) GN=rplB PE=3 SV=1	1	2	2	2	11.4	11.4	11.4	29.579	273	273	0	16.684	1847900	5				36	39;101	True;True	40;104	64;165	166;167;355;356;357	166;356
sp|Q9HWE2|RL16_PSEAE	sp|Q9HWE2|RL16_PSEAE	3	3	3	>sp|Q9HWE2|RL16_PSEAE 50S ribosomal protein L16 OS=Pseudomonas aeruginosa (strain ATCC 15692 / PAO1 / 1C / PRS 101 / LMG 12228) GN=rplP PE=3 SV=1	1	3	3	3	23.4	23.4	23.4	15.401	137	137	0	21.232	4268400	5				37	165;271;284	True;True;True	170;283;297	299;527;554;555	696;1390;1468;1469;1470	696;1390;1468
sp|Q9HZ71|RS1_PSEAE	sp|Q9HZ71|RS1_PSEAE	3	3	3	>sp|Q9HZ71|RS1_PSEAE 30S ribosomal protein S1 OS=Pseudomonas aeruginosa (strain ATCC 15692 / PAO1 / 1C / PRS 101 / LMG 12228) GN=rpsA PE=3 SV=1	1	3	3	3	7.7	7.7	7.7	61.869	559	559	0	28.5	2039700	5				38	12;64;82	True;True;True	12;66;84	23;108;134	76;251;252;289;290	76;251;289
sp|Q9HZE0|DHE2_PSEAE	sp|Q9HZE0|DHE2_PSEAE	4	4	4	>sp|Q9HZE0|DHE2_PSEAE NAD-specific glutamate dehydrogenase OS=Pseudomonas aeruginosa (strain ATCC 15692 / PAO1 / 1C / PRS 101 / LMG 12228) GN=gdhB PE=1 SV=1	1	4	4	4	4.2	4.2	4.2	182.64	1620	1620	0	30.898	1445400	8				39	35;149;174;298	True;True;True;True	36;154;179;311	58;273;314;586;587;588	155;630;631;632;734;1636;1637;1638	155;631;734;1638
sp|Q9HZJ2|FADB_PSEAE	sp|Q9HZJ2|FADB_PSEAE	1	1	1	>sp|Q9HZJ2|FADB_PSEAE Fatty acid oxidation complex subunit alpha OS=Pseudomonas aeruginosa (strain ATCC 15692 / PAO1 / 1C / PRS 101 / LMG 12228) GN=fadB PE=3 SV=1	1	1	1	1	2.5	2.5	2.5	76.953	715	715	0	6.3567	139990	1				40	247	TRUE	259	487	1294	1294
sp|Q9I0A2|RL20_PSEAE	sp|Q9I0A2|RL20_PSEAE	1	1	1	>sp|Q9I0A2|RL20_PSEAE 50S ribosomal protein L20 OS=Pseudomonas aeruginosa (strain ATCC 15692 / PAO1 / 1C / PRS 101 / LMG 12228) GN=rplT PE=3 SV=1	1	1	1	1	7.6	7.6	7.6	13.365	118	118	0	5.8105	1882900	1				41	1	TRUE	1	1	1	1
sp|Q9I0J6|NUOG_PSEAE	sp|Q9I0J6|NUOG_PSEAE	1	1	1	>sp|Q9I0J6|NUOG_PSEAE NADH-quinone oxidoreductase subunit G OS=Pseudomonas aeruginosa (strain ATCC 15692 / PAO1 / 1C / PRS 101 / LMG 12228) GN=nuoG PE=3 SV=1	1	1	1	1	1.7	1.7	1.7	98.999	905	905	0	5.8657	0	1				42	167	TRUE	172	302	699	699
sp|Q9I0K4|ACEA_PSEAE	sp|Q9I0K4|ACEA_PSEAE	5	5	5	>sp|Q9I0K4|ACEA_PSEAE Isocitrate lyase OS=Pseudomonas aeruginosa (strain ATCC 15692 / PAO1 / 1C / PRS 101 / LMG 12228) GN=PA2634 PE=1 SV=1	1	5	5	5	13.2	13.2	13.2	58.886	531	531	0	56.326	5773800	15				43	70;172;189;238;285	True;True;True;True;True	72;177;197;250;298	116;117;312;383;384;474;475;556	262;263;264;730;731;991;992;993;1254;1255;1256;1257;1258;1259;1471	264;731;992;1254;1471
sp|Q9I2U8|SYQ_PSEAE	sp|Q9I2U8|SYQ_PSEAE	1	1	1	>sp|Q9I2U8|SYQ_PSEAE Glutamine--tRNA ligase OS=Pseudomonas aeruginosa (strain ATCC 15692 / PAO1 / 1C / PRS 101 / LMG 12228) GN=glnS PE=1 SV=1	1	1	1	1	2.2	2.2	2.2	62.912	556	556	1	-2	1035500	1	+			44	67	TRUE	69	112	257	257	29	376
sp|Q9I2V5|ACNB_PSEAE	sp|Q9I2V5|ACNB_PSEAE	5	5	5	>sp|Q9I2V5|ACNB_PSEAE Aconitate hydratase B OS=Pseudomonas aeruginosa (strain ATCC 15692 / PAO1 / 1C / PRS 101 / LMG 12228) GN=acnB PE=3 SV=1	1	5	5	5	7.4	7.4	7.4	93.627	869	869	0	35.278	5286800	8				45	8;51;164;232;280	True;True;True;True;True	8;52;169;244;292	16;81;82;298;463;544	69;187;188;189;190;695;1205;1436	69;190;695;1205;1436
sp|Q9I3D1|DLDH2_PSEAE	sp|Q9I3D1|DLDH2_PSEAE	2	2	2	>sp|Q9I3D1|DLDH2_PSEAE Dihydrolipoyl dehydrogenase OS=Pseudomonas aeruginosa (strain ATCC 15692 / PAO1 / 1C / PRS 101 / LMG 12228) GN=lpdG PE=3 SV=1	1	2	2	2	6.7	6.7	6.7	50.164	478	478	0	20.355	3668000	5				46	7;249	True;True	7;261	14;15;490	66;67;68;1298;1299	68;1298
sp|Q9I3F5|ACNA_PSEAE	sp|Q9I3F5|ACNA_PSEAE	6	6	6	>sp|Q9I3F5|ACNA_PSEAE Aconitate hydratase A OS=Pseudomonas aeruginosa (strain ATCC 15692 / PAO1 / 1C / PRS 101 / LMG 12228) GN=acnA PE=3 SV=1	1	6	6	6	10.9	10.9	10.9	99.147	910	910	0	42.57	9200900	15				47	50;246;256;267;269;305	True;True;True;True;True;True	51;258;268;279;281;318	80;486;498;499;521;522;524;600	186;1291;1292;1293;1308;1309;1310;1311;1312;1313;1383;1384;1385;1387;1660	186;1293;1312;1385;1387;1660
sp|Q9I576|HPPD_PSEAE	sp|Q9I576|HPPD_PSEAE	2	2	2	>sp|Q9I576|HPPD_PSEAE 4-hydroxyphenylpyruvate dioxygenase OS=Pseudomonas aeruginosa (strain ATCC 15692 / PAO1 / 1C / PRS 101 / LMG 12228) GN=hpd PE=3 SV=1	1	2	2	2	7.3	7.3	7.3	39.912	357	357	0	22.73	1948100	7				48	80;186	True;True	82;194	132;377;378	286;980;981;982;983;984;985	286;980	30	269
sp|Q9I685|SAHH_PSEAE	sp|Q9I685|SAHH_PSEAE	6	6	6	>sp|Q9I685|SAHH_PSEAE Adenosylhomocysteinase OS=Pseudomonas aeruginosa (strain ATCC 15692 / PAO1 / 1C / PRS 101 / LMG 12228) GN=ahcY PE=3 SV=1	1	6	6	6	17.7	17.7	17.7	51.399	469	469	0	40.161	7184700	16				49	85;115;125;202;212;277	True;True;True;True;True;True	87;119;130;210;220;289	138;139;186;187;203;204;407;419;538;539	297;298;299;397;398;399;423;424;425;426;427;1032;1051;1420;1421;1422	297;399;426;1032;1051;1422	31;32	5;387
sp|Q9I6M4|DAVT_PSEAE	sp|Q9I6M4|DAVT_PSEAE	2	2	2	>sp|Q9I6M4|DAVT_PSEAE 5-aminovalerate aminotransferase DavT OS=Pseudomonas aeruginosa (strain ATCC 15692 / PAO1 / 1C / PRS 101 / LMG 12228) GN=davT PE=1 SV=1	1	2	2	2	8.2	8.2	8.2	45.22	426	426	0	11.773	2051800	3				50	231;242	True;True	243;254	461;462;481	1203;1204;1281;1282;1283	1203;1281
sp|Q9I6M5|DAVD_PSEAE	sp|Q9I6M5|DAVD_PSEAE	1	1	1	>sp|Q9I6M5|DAVD_PSEAE Glutarate-semialdehyde dehydrogenase DavD OS=Pseudomonas aeruginosa (strain ATCC 15692 / PAO1 / 1C / PRS 101 / LMG 12228) GN=davD PE=1 SV=1	1	1	1	1	3.1	3.1	3.1	51.622	483	483	0	10.38	990340	2				51	273	TRUE	285	532	1407;1408	1408
sp|Q9I747|HCP1_PSEAE	sp|Q9I747|HCP1_PSEAE	1	1	1	>sp|Q9I747|HCP1_PSEAE Protein hcp1 OS=Pseudomonas aeruginosa (strain ATCC 15692 / PAO1 / 1C / PRS 101 / LMG 12228) GN=hcp1 PE=1 SV=1	1	1	1	1	6.2	6.2	6.2	17.414	162	162	0	5.5827	590660	1				52	276	TRUE	288	537	1419	1419
tr|Q9HTD1|Q9HTD1_PSEAE	tr|Q9HTD1|Q9HTD1_PSEAE	33	33	33	>tr|Q9HTD1|Q9HTD1_PSEAE Probable transcarboxylase subunit OS=Pseudomonas aeruginosa (strain ATCC 15692 / PAO1 / 1C / PRS 101 / LMG 12228) GN=PA5435 PE=4 SV=1	1	33	33	33	56.3	56.3	56.3	66.095	607	607	0	283.74	400010000	218				53	5;6;28;29;33;34;44;47;57;63;79;84;97;99;100;109;112;136;176;177;201;213;214;243;244;274;281;282;283;299;300;301;302	True;True;True;True;True;True;True;True;True;True;True;True;True;True;True;True;True;True;True;True;True;True;True;True;True;True;True;True;True;True;True;True;True	5;6;29;30;34;35;45;48;58;59;65;81;86;99;101;102;103;112;115;116;141;181;182;183;209;221;222;223;224;255;256;286;293;294;295;296;312;313;314;315	10;11;12;13;46;47;54;55;56;57;71;76;92;93;94;95;104;105;106;107;130;131;136;137;157;158;161;162;163;164;175;176;180;181;182;252;253;317;318;319;320;321;322;403;404;405;406;420;421;422;423;424;425;426;427;428;482;483;484;533;534;545;546;547;548;549;550;551;552;553;589;590;591;592;593;594;595;596;597	49;50;51;52;53;54;55;56;57;58;59;60;61;62;63;64;65;129;130;146;147;148;149;150;151;152;153;154;175;182;206;207;208;209;210;211;212;213;214;215;236;237;238;239;240;241;242;243;244;245;246;247;248;249;250;283;284;285;292;293;294;295;296;328;329;330;331;332;333;334;335;338;339;340;341;342;343;344;345;346;347;348;349;350;351;352;353;354;375;376;377;378;379;380;381;382;388;389;390;391;392;393;584;585;…	53;57;129;130;146;151;175;182;210;242;283;292;329;339;345;380;391;584;739;758;1026;1052;1060;1287;1289;1409;1437;1459;1465;1639;1647;1650;1657	33;34;35;36;37;38;39;40;41;42	125;169;172;182;239;251;274;306;323;435
tr|Q9HTP2|Q9HTP2_PSEAE	tr|Q9HTP2|Q9HTP2_PSEAE	1	1	1	>tr|Q9HTP2|Q9HTP2_PSEAE Probable aldehyde dehydrogenase OS=Pseudomonas aeruginosa (strain ATCC 15692 / PAO1 / 1C / PRS 101 / LMG 12228) GN=PA5312 PE=3 SV=1	1	1	1	1	2.4	2.4	2.4	53.143	497	497	0	6.7103	1648700	1				54	107	TRUE	110	172;173	372;373	373
tr|Q9HVJ1|Q9HVJ1_PSEAE	tr|Q9HVJ1|Q9HVJ1_PSEAE	1	1	1	>tr|Q9HVJ1|Q9HVJ1_PSEAE Probable ATP-binding component of ABC transporter OS=Pseudomonas aeruginosa (strain ATCC 15692 / PAO1 / 1C / PRS 101 / LMG 12228) GN=PA4595 PE=4 SV=1	1	1	1	1	2.2	2.2	2.2	61.32	554	554	0	6.0621	394480	0				55	268	TRUE	280	523	1386	1386
tr|Q9HW49|Q9HW49_PSEAE	tr|Q9HW49|Q9HW49_PSEAE	3	3	3	>tr|Q9HW49|Q9HW49_PSEAE Uncharacterized protein OS=Pseudomonas aeruginosa (strain ATCC 15692 / PAO1 / 1C / PRS 101 / LMG 12228) GN=PA4352 PE=3 SV=1	1	3	3	3	23.8	23.8	23.8	30.972	286	286	0	19.975	3125300	7				56	45;139;259	True;True;True	46;144;271	72;73;256;505;506	176;177;178;589;1358;1359;1360	178;589;1360	43;44	100;158
tr|Q9HWP4|Q9HWP4_PSEAE	tr|Q9HWP4|Q9HWP4_PSEAE	1	1	1	>tr|Q9HWP4|Q9HWP4_PSEAE Probable porin OS=Pseudomonas aeruginosa (strain ATCC 15692 / PAO1 / 1C / PRS 101 / LMG 12228) GN=PA4137 PE=1 SV=1	1	1	1	1	4.8	4.8	4.8	46.408	418	418	0	5.4778	14457000	1				57	144	TRUE	149	264	597	597
tr|Q9HWV0|Q9HWV0_PSEAE	tr|Q9HWV0|Q9HWV0_PSEAE	2	2	2	>tr|Q9HWV0|Q9HWV0_PSEAE Probable nonribosomal peptide synthetase OS=Pseudomonas aeruginosa (strain ATCC 15692 / PAO1 / 1C / PRS 101 / LMG 12228) GN=PA4078 PE=4 SV=1	1	2	2	2	2.7	2.7	2.7	110.35	991	991	0	13.25	1206900	2				58	218;304	True;True	228;317	434;599	1076;1659	1076;1659
tr|Q9I2C4|Q9I2C4_PSEAE;tr|Q9HX05|Q9HX05_PSEAE	tr|Q9I2C4|Q9I2C4_PSEAE;tr|Q9HX05|Q9HX05_PSEAE	1;1	1;1	1;1	>tr|Q9I2C4|Q9I2C4_PSEAE NAD+ dependent aldehyde dehydrogenase ExaC OS=Pseudomonas aeruginosa (strain ATCC 15692 / PAO1 / 1C / PRS 101 / LMG 12228) GN=exaC PE=3 SV=1;>tr|Q9HX05|Q9HX05_PSEAE Probable aldehyde dehydrogenase OS=Pseudomonas aeruginosa (strain A	2	1	1	1	3	3	3	54.892	506	506;506	0	5.4516	501190	2				59	106	TRUE	109	171	370;371	371
tr|Q9HXA7|Q9HXA7_PSEAE	tr|Q9HXA7|Q9HXA7_PSEAE	1	1	1	>tr|Q9HXA7|Q9HXA7_PSEAE Uncharacterized protein OS=Pseudomonas aeruginosa (strain ATCC 15692 / PAO1 / 1C / PRS 101 / LMG 12228) GN=PA3906 PE=4 SV=1	1	1	1	1	8.7	8.7	8.7	14.764	127	127	0	5.4957	917300	1				60	178	TRUE	184	323	759	759	45	1
tr|Q9HXR8|Q9HXR8_PSEAE	tr|Q9HXR8|Q9HXR8_PSEAE	1	1	1	>tr|Q9HXR8|Q9HXR8_PSEAE Probable FMN oxidoreductase OS=Pseudomonas aeruginosa (strain ATCC 15692 / PAO1 / 1C / PRS 101 / LMG 12228) GN=PA3723 PE=4 SV=1	1	1	1	1	3	3	3	40.318	368	368	0	6.9488	317750	0				61	241	TRUE	253	480	1280	1280
tr|Q9HY81|Q9HY81_PSEAE	tr|Q9HY81|Q9HY81_PSEAE	2	2	2	>tr|Q9HY81|Q9HY81_PSEAE Probable peroxidase OS=Pseudomonas aeruginosa (strain ATCC 15692 / PAO1 / 1C / PRS 101 / LMG 12228) GN=PA3529 PE=1 SV=1	1	2	2	2	12	12	12	21.822	200	200	0	20.647	12914000	8				62	46;226	True;True	47;237	74;75;447;448	179;180;181;1129;1130;1131;1132;1133	179;1132
tr|Q9HYT5|Q9HYT5_PSEAE	tr|Q9HYT5|Q9HYT5_PSEAE	4	4	4	>tr|Q9HYT5|Q9HYT5_PSEAE Uncharacterized protein OS=Pseudomonas aeruginosa (strain ATCC 15692 / PAO1 / 1C / PRS 101 / LMG 12228) GN=PA3309 PE=3 SV=1	1	4	4	4	33.1	33.1	33.1	16.496	151	151	0	31.378	15294000	7				63	104;124;160;263	True;True;True;True	107;129;165;275	169;202;292;293;512;513	368;422;686;687;1369;1370;1371;1372	368;422;687;1371	46	129
tr|Q9HZK4|Q9HZK4_PSEAE	tr|Q9HZK4|Q9HZK4_PSEAE	2	2	2	>tr|Q9HZK4|Q9HZK4_PSEAE Glyceraldehyde-3-phosphate dehydrogenase OS=Pseudomonas aeruginosa (strain ATCC 15692 / PAO1 / 1C / PRS 101 / LMG 12228) GN=PA3001 PE=3 SV=1	1	2	2	2	6.3	6.3	6.3	50.111	461	461	0	12.474	481340	2				64	147;211	True;True	152;219	268;418	602;1050	602;1050	47	325
tr|Q9I017|Q9I017_PSEAE	tr|Q9I017|Q9I017_PSEAE	1	1	1	>tr|Q9I017|Q9I017_PSEAE Glutathione peroxidase OS=Pseudomonas aeruginosa (strain ATCC 15692 / PAO1 / 1C / PRS 101 / LMG 12228) GN=PA2826 PE=3 SV=1	1	1	1	1	11.2	11.2	11.2	17.659	161	161	1	-2	24385000	1	+			65	181	TRUE	187	328	769	769	48	1
tr|Q9I0L5|Q9I0L5_PSEAE	tr|Q9I0L5|Q9I0L5_PSEAE	7	7	7	>tr|Q9I0L5|Q9I0L5_PSEAE Isocitrate dehydrogenase [NADP] OS=Pseudomonas aeruginosa (strain ATCC 15692 / PAO1 / 1C / PRS 101 / LMG 12228) GN=icd PE=3 SV=1	1	7	7	7	21.5	21.5	21.5	45.577	418	418	0	51.157	10016000	13				66	26;95;132;194;255;275;294	True;True;True;True;True;True;True	27;97;137;202;267;287;307	43;154;155;243;392;497;535;536;569	125;126;322;323;324;325;559;560;1003;1004;1307;1417;1418;1492	125;324;560;1003;1307;1417;1492	49;50;51;52	21;47;364;365
tr|Q9I0T1|Q9I0T1_PSEAE	tr|Q9I0T1|Q9I0T1_PSEAE	1	1	1	>tr|Q9I0T1|Q9I0T1_PSEAE Probable acyl-CoA thiolase OS=Pseudomonas aeruginosa (strain ATCC 15692 / PAO1 / 1C / PRS 101 / LMG 12228) GN=PA2553 PE=3 SV=1	1	1	1	1	3.3	3.3	3.3	41.4	396	396	0	10.738	556170	1				67	61	TRUE	63	101	233	233
tr|Q9I1H5|Q9I1H5_PSEAE	tr|Q9I1H5|Q9I1H5_PSEAE	3	3	3	>tr|Q9I1H5|Q9I1H5_PSEAE Chitinase OS=Pseudomonas aeruginosa (strain ATCC 15692 / PAO1 / 1C / PRS 101 / LMG 12228) GN=chiC PE=3 SV=1	1	3	3	3	9.7	9.7	9.7	53.042	483	483	0	19.929	1473800	3				68	108;140;199	True;True;True	111;145;207	174;257;400	374;590;1016	374;590;1016
tr|Q9I246|Q9I246_PSEAE	tr|Q9I246|Q9I246_PSEAE	4	4	4	>tr|Q9I246|Q9I246_PSEAE Probable carbamoyl transferase OS=Pseudomonas aeruginosa (strain ATCC 15692 / PAO1 / 1C / PRS 101 / LMG 12228) GN=PA2069 PE=4 SV=1	1	4	4	4	9.8	9.8	9.8	63.382	574	574	0	31.261	4700300	9				69	130;197;217;221	True;True;True;True	135;205;227;231	240;396;397;398;432;433;437	555;1010;1011;1012;1013;1014;1074;1075;1079;1080	555;1011;1075;1079
tr|Q9I299|Q9I299_PSEAE	tr|Q9I299|Q9I299_PSEAE	12	12	12	>tr|Q9I299|Q9I299_PSEAE Methylcrotonyl-CoA carboxylase, alpha-subunit (Biotin-containing) OS=Pseudomonas aeruginosa (strain ATCC 15692 / PAO1 / 1C / PRS 101 / LMG 12228) GN=liuD PE=1 SV=1	1	12	12	12	23.8	23.8	23.8	71.282	655	655	0	84.852	22041000	24				70	22;62;105;114;116;123;143;153;158;173;289;290	True;True;True;True;True;True;True;True;True;True;True;True	23;64;108;118;120;128;148;158;163;178;302;303	38;102;103;170;184;185;188;201;262;263;278;289;313;561;562;563	117;118;119;234;235;369;395;396;400;401;421;595;596;642;680;732;733;1477;1478;1479;1480;1481;1482;1483	117;235;369;395;401;421;596;642;680;733;1477;1479	53	413
tr|Q9I3D3|Q9I3D3_PSEAE	tr|Q9I3D3|Q9I3D3_PSEAE	1	1	1	>tr|Q9I3D3|Q9I3D3_PSEAE 2-oxoglutarate dehydrogenase (E1 subunit) OS=Pseudomonas aeruginosa (strain ATCC 15692 / PAO1 / 1C / PRS 101 / LMG 12228) GN=sucA PE=4 SV=1	1	1	1	1	1.8	1.8	1.8	105.88	943	943	0	7.8775	1482400	4				71	163	TRUE	168	296;297	691;692;693;694	692
tr|Q9I3D4|Q9I3D4_PSEAE	tr|Q9I3D4|Q9I3D4_PSEAE	2	2	2	>tr|Q9I3D4|Q9I3D4_PSEAE Succinate dehydrogenase (B subunit) OS=Pseudomonas aeruginosa (strain ATCC 15692 / PAO1 / 1C / PRS 101 / LMG 12228) GN=sdhB PE=4 SV=1	1	2	2	2	11.9	11.9	11.9	26.155	235	235	0	15.352	3542300	3				72	78;265	True;True	80;277	129;515;516	282;1374;1375	282;1375
tr|Q9I3D5|Q9I3D5_PSEAE	tr|Q9I3D5|Q9I3D5_PSEAE	4	4	4	>tr|Q9I3D5|Q9I3D5_PSEAE Succinate dehydrogenase flavoprotein subunit OS=Pseudomonas aeruginosa (strain ATCC 15692 / PAO1 / 1C / PRS 101 / LMG 12228) GN=sdhA PE=3 SV=1	1	4	4	4	8	8	8	63.531	590	590	0	31.496	5847300	13				73	89;110;111;150	True;True;True;True	91;113;114;155	144;177;178;179;274;275	304;383;384;385;386;387;633;634;635;636;637;638;639	304;383;384;633
tr|Q9I3G6|Q9I3G6_PSEAE	tr|Q9I3G6|Q9I3G6_PSEAE	1	1	1	>tr|Q9I3G6|Q9I3G6_PSEAE Probable ferredoxin OS=Pseudomonas aeruginosa (strain ATCC 15692 / PAO1 / 1C / PRS 101 / LMG 12228) GN=PA1551 PE=4 SV=1	1	1	1	1	2.1	2.1	2.1	53.62	471	471	0	6.1346	0	1				74	92	TRUE	94	150	318	318
tr|Q9I491|Q9I491_PSEAE	tr|Q9I491|Q9I491_PSEAE	1	1	1	>tr|Q9I491|Q9I491_PSEAE Probable semialdehyde dehydrogenase OS=Pseudomonas aeruginosa (strain ATCC 15692 / PAO1 / 1C / PRS 101 / LMG 12228) GN=PA1253 PE=4 SV=1	1	1	1	1	1.9	1.9	1.9	55.429	526	526	0	5.4496	1004300	0				75	0	TRUE	0	0	0	0
tr|Q9I5B4|Q9I5B4_PSEAE	tr|Q9I5B4|Q9I5B4_PSEAE	1	1	1	>tr|Q9I5B4|Q9I5B4_PSEAE Uncharacterized protein OS=Pseudomonas aeruginosa (strain ATCC 15692 / PAO1 / 1C / PRS 101 / LMG 12228) GN=PA0825 PE=4 SV=1	1	1	1	1	16.2	16.2	16.2	12.152	111	111	1	-2	4756700	1	+			76	182	TRUE	188	329	770	770	54	1
tr|Q9I5E3|Q9I5E3_PSEAE	tr|Q9I5E3|Q9I5E3_PSEAE	1	1	1	>tr|Q9I5E3|Q9I5E3_PSEAE Citrate synthase OS=Pseudomonas aeruginosa (strain ATCC 15692 / PAO1 / 1C / PRS 101 / LMG 12228) GN=prpC PE=3 SV=1	1	1	1	1	3.7	3.7	3.7	41.689	375	375	0	6.3696	1120600	2				77	120	TRUE	124	193;194	406;407	406
tr|Q9I5U9|Q9I5U9_PSEAE	tr|Q9I5U9|Q9I5U9_PSEAE	7	7	7	>tr|Q9I5U9|Q9I5U9_PSEAE Uncharacterized protein OS=Pseudomonas aeruginosa (strain ATCC 15692 / PAO1 / 1C / PRS 101 / LMG 12228) GN=PA0588 PE=4 SV=1	1	7	7	7	13	13	13	73.722	640	640	0	58.205	9318900	15				78	58;157;161;175;188;195;292	True;True;True;True;True;True;True	60;162;166;180;196;203;305	96;97;287;288;294;315;316;381;382;393;565;566	216;217;218;219;677;678;679;688;735;736;989;990;1005;1487;1488	216;677;688;735;989;1005;1487	55	412
tr|Q9I611|Q9I611_PSEAE	tr|Q9I611|Q9I611_PSEAE	1	1	1	>tr|Q9I611|Q9I611_PSEAE Probable acyl-CoA dehydrogenase OS=Pseudomonas aeruginosa (strain ATCC 15692 / PAO1 / 1C / PRS 101 / LMG 12228) GN=PA0507 PE=3 SV=1	1	1	1	1	1.8	1.8	1.8	64.349	598	598	1	-2	1035500	1	+			79	198	TRUE	206	399	1015	1015	56	11
tr|Q9I6Z3|Q9I6Z3_PSEAE	tr|Q9I6Z3|Q9I6Z3_PSEAE	6	6	6	>tr|Q9I6Z3|Q9I6Z3_PSEAE Alkyl hydroperoxide reductase subunit C OS=Pseudomonas aeruginosa (strain ATCC 15692 / PAO1 / 1C / PRS 101 / LMG 12228) GN=ahpC PE=4 SV=1	1	6	6	6	45.5	45.5	45.5	20.541	187	187	0	42.115	14875000	10				80	36;76;98;223;245;253	True;True;True;True;True;True	37;78;100;233;257;265	59;60;126;159;160;440;441;485;495	156;157;158;275;336;337;1084;1085;1290;1305	156;275;337;1084;1290;1305

## Sheet: 7-2 proteinGroups Probe 12
Protein IDs	Majority protein IDs	Peptide counts (all)	Peptide counts (razor+unique)	Peptide counts (unique)	Fasta headers	Number of proteins	Peptides	Razor + unique peptides	Unique peptides	Sequence coverage [%]	Unique + razor sequence coverage [%]	Unique sequence coverage [%]	Mol. weight [kDa]	Sequence length	Sequence lengths	Q-value	Score	Intensity	MS/MS Count	Only identified by site	Reverse	Potential contaminant	id	Peptide IDs	Peptide is razor	Mod. peptide IDs	Evidence IDs	MS/MS IDs	Best MS/MS	Oxidation (M) site IDs	Oxidation (M) site positions
CON__P00761	CON__P00761	4	4	4	>P00761 SWISS-PROT:P00761|TRYP_PIG Trypsin - Sus scrofa (Pig).	1	4	4	4	25.1	25.1	25.1	24.409	231	231	0	55.429	952250000	80			+	0	269;339;386;563	True;True;True;True	293;294;365;413;605	479;480;481;482;483;614;615;616;617;618;695;696;1059;1060	920;921;922;923;924;925;926;927;928;929;930;931;932;933;1179;1180;1181;1182;1183;1184;1185;1186;1187;1188;1189;1190;1191;1192;1193;1194;1195;1196;1197;1198;1199;1200;1201;1202;1203;1329;1330;1331;1332;1333;1334;1335;1336;1337;1338;1339;2095;2096;2097;2098;2099;2100;2101;2102;2103;2104;2105;2106;2107;2108;2109;2110;2111;2112;2113;2114;2115;2116;2117;2118;2119;2120;2121;2122;2123;2124;2125	930;1202;1330;2101	0	94
CON__P02535-1;CON__P13645	CON__P02535-1;CON__P13645	1;1	1;1	1;1	>P02535-1 SWISS-PROT:P02535-1 Tax_Id=10090 Gene_Symbol=Krt10 Isoform 1 of Keratin, type I cytoskeletal 10;>P13645 SWISS-PROT:P13645 Tax_Id=9606 Gene_Symbol=KRT10 Keratin, type I cytoskeletal 10	2	1	1	1	1.6	1.6	1.6	57.769	570	570;593	0	6.9948	1495900	2			+	1	331	TRUE	357	600;601	1155;1156	1156
CON__P04264;CON__Q9R0H5;CON__Q6NXH9;CON__Q8BGZ7;CON__P50446;CON__Q6IFZ6;CON__Q7Z794;CON__Q922U2;CON__Q5XQN5;CON__ENSEMBL:ENSBTAP00000038253;CON__P35908	CON__P04264;CON__Q9R0H5;CON__Q6NXH9;CON__Q8BGZ7;CON__P50446;CON__Q6IFZ6;CON__Q7Z794;CON__Q922U2;CON__Q5XQN5;CON__ENSEMBL:ENSBTAP00000038253;CON__P35908	2;1;1;1;1;1;1;1;1;1;1	2;1;1;1;1;1;1;1;1;1;1	2;1;1;1;1;1;1;1;1;1;1	>P04264 SWISS-PROT:P04264 Tax_Id=9606 Gene_Symbol=KRT1 Keratin, type II cytoskeletal 1;>Q9R0H5 SWISS-PROT:Q9R0H5 Tax_Id=10090 Gene_Symbol=Krt71 Keratin, type II cytoskeletal 6G;>Q6NXH9 TREMBL:Q6NXH9 Tax_Id=10090 Gene_Symbol=Krt73 Keratin 73;>Q8BGZ7 TREMBL:	11	2	2	2	3.7	3.7	3.7	66.017	644	644;524;539;551;553;572;578;580;601;606;645	0	31.17	4221300	4			+	2	173;500	True;True	193;538	319;320;945	655;656;657;1800	655;1800
CON__Q28194	CON__Q28194	1	1	1	>Q28194 TREMBL:Q28194 (Bos taurus) Thrombospondin-1	1	1	1	1	0.9	0.9	0.9	129.39	1170	1170	0.005848	5.5547	0	1			+	3	92	TRUE	102	172	401	401
CON__Streptavidin	CON__Streptavidin	5	5	5	>Streptavidin (S.avidinii)	1	5	5	5	43.1	43.1	43.1	16.622	160	160	0	86.259	832410000	241			+	4	285;286;427;511;643	True;True;True;True;True	311;312;462;550;689	510;511;512;513;514;515;516;517;518;519;520;521;522;523;524;782;783;784;785;786;787;788;789;790;791;792;793;794;795;796;797;798;799;800;801;802;803;804;805;806;807;808;809;810;811;812;962;963;964;965;966;1199;1200;1201;1202;1203;1204;1205;1206;1207;1208;1209;1210;1211	981;982;983;984;985;986;987;988;989;990;991;992;993;994;995;996;997;998;999;1000;1001;1002;1003;1004;1005;1006;1007;1008;1009;1010;1011;1012;1013;1014;1015;1016;1017;1018;1019;1020;1021;1022;1023;1024;1025;1026;1027;1028;1029;1030;1031;1032;1033;1034;1035;1036;1037;1038;1039;1040;1041;1042;1043;1044;1045;1046;1047;1048;1049;1510;1511;1512;1513;1514;1515;1516;1517;1518;1519;1520;1521;1522;1523;152…	1011;1049;1512;1867;2423
tr|Q9HTK5|Q9HTK5_PSEAE;REV__tr|Q9HTK5|Q9HTK5_PSEAE	tr|Q9HTK5|Q9HTK5_PSEAE;REV__tr|Q9HTK5|Q9HTK5_PSEAE	1;1	1;1	1;1	>tr|Q9HTK5|Q9HTK5_PSEAE Glycolate oxidase iron-sulfur subunit OS=Pseudomonas aeruginosa (strain ATCC 15692 / PAO1 / 1C / PRS 101 / LMG 12228) GN=glcF PE=4 SV=1;>tr|Q9HTK5|Q9HTK5_PSEAE Glycolate oxidase iron-sulfur subunit OS=Pseudomonas aeruginosa (strain	2	1	1	1	1.7	1.7	1.7	44.74	408	408;408	0.0057471	5.5138	3544300	0				5	111	TRUE	123	212;213	477;478	477
REV__tr|Q9HXW2|Q9HXW2_PSEAE	REV__tr|Q9HXW2|Q9HXW2_PSEAE	1	1	1	>tr|Q9HXW2|Q9HXW2_PSEAE Probable transcriptional regulator OS=Pseudomonas aeruginosa (strain ATCC 15692 / PAO1 / 1C / PRS 101 / LMG 12228) GN=PA3678 PE=4 SV=1	1	1	1	1	0	0	0	23.15	212	212	0.0063694	5.8175	74848000	9		+		6	312	TRUE	338	567	1106;1107;1108;1109;1110;1111;1112;1113;1114	1108
sp|G3XD23|WBPB_PSEAE	sp|G3XD23|WBPB_PSEAE	1	1	1	>sp|G3XD23|WBPB_PSEAE UDP-N-acetyl-2-amino-2-deoxy-D-glucuronate oxidase OS=Pseudomonas aeruginosa (strain ATCC 15692 / PAO1 / 1C / PRS 101 / LMG 12228) GN=wbpB PE=1 SV=1	1	1	1	1	2.5	2.5	2.5	35.717	316	316	0	7.172	1010600	1				7	405	TRUE	432	731	1406	1406
sp|O52759|RS4_PSEAE	sp|O52759|RS4_PSEAE	2	2	2	>sp|O52759|RS4_PSEAE 30S ribosomal protein S4 OS=Pseudomonas aeruginosa (strain ATCC 15692 / PAO1 / 1C / PRS 101 / LMG 12228) GN=rpsD PE=3 SV=2	1	2	2	2	12.6	12.6	12.6	23.277	206	206	0	27	14561000	8				8	40;384	True;True	46;411	77;78;691;692	213;214;215;216;217;1324;1325;1326	216;1324
sp|O52760|RPOA_PSEAE	sp|O52760|RPOA_PSEAE	3	3	3	>sp|O52760|RPOA_PSEAE DNA-directed RNA polymerase subunit alpha OS=Pseudomonas aeruginosa (strain ATCC 15692 / PAO1 / 1C / PRS 101 / LMG 12228) GN=rpoA PE=3 SV=2	1	3	3	3	9.6	9.6	9.6	36.649	333	333	0	16.745	823750	3				9	293;381;419	True;True;True	319;408;450	536;688;758	1063;1321;1455	1063;1321;1455
sp|O52762|CATA_PSEAE	sp|O52762|CATA_PSEAE	8	8	8	>sp|O52762|CATA_PSEAE Catalase OS=Pseudomonas aeruginosa (strain ATCC 15692 / PAO1 / 1C / PRS 101 / LMG 12228) GN=katA PE=1 SV=1	1	8	8	8	19.7	19.7	19.7	55.588	482	482	0	80.079	52488000	32				10	114;214;217;332;391;425;465;659	True;True;True;True;True;True;True;True	126;235;236;239;358;418;460;502;705	218;386;387;388;389;393;394;602;603;705;706;707;708;779;879;1237;1238	486;758;759;760;761;762;763;764;765;766;767;771;772;773;774;1157;1158;1159;1160;1161;1353;1354;1355;1356;1357;1358;1359;1360;1361;1507;1694;2473;2474	486;760;774;1161;1355;1507;1694;2473	1	30
sp|O54439|ACP1_PSEAE	sp|O54439|ACP1_PSEAE	2	2	2	>sp|O54439|ACP1_PSEAE Acyl carrier protein 1 OS=Pseudomonas aeruginosa (strain ATCC 15692 / PAO1 / 1C / PRS 101 / LMG 12228) GN=acpP1 PE=3 SV=4	1	2	2	2	32.1	32.1	32.1	8.7406	78	78	0	19.453	1909600	6				11	295;297	True;True	321;323	538;539;542	1065;1066;1067;1068;1069;1072	1069;1072
sp|O68822|AMPA_PSEAE	sp|O68822|AMPA_PSEAE	6	6	6	>sp|O68822|AMPA_PSEAE Cytosol aminopeptidase OS=Pseudomonas aeruginosa (strain ATCC 15692 / PAO1 / 1C / PRS 101 / LMG 12228) GN=pepA PE=3 SV=1	1	6	6	6	14.5	14.5	14.5	52.331	495	495	0	45.126	25653000	16				12	81;82;207;354;365;579	True;True;True;True;True;True	90;91;228;380;391;623	154;155;156;377;643;644;659;660;1084;1085	358;359;360;746;1256;1257;1258;1278;1279;1280;1281;2167;2168;2169;2170;2171	359;360;746;1258;1278;2167
sp|O69754|PHZF_PSEAE	sp|O69754|PHZF_PSEAE	2	2	2	>sp|O69754|PHZF_PSEAE Trans-2,3-dihydro-3-hydroxyanthranilate isomerase OS=Pseudomonas aeruginosa (strain ATCC 15692 / PAO1 / 1C / PRS 101 / LMG 12228) GN=phzF1 PE=3 SV=2	1	2	2	2	20.5	20.5	20.5	30.342	278	278	0	14.456	10225000	4				13	254;410	True;True	278;438	454;455;740	889;890;891;1421	891;1421
sp|O82850|RS2_PSEAE	sp|O82850|RS2_PSEAE	2	2	2	>sp|O82850|RS2_PSEAE 30S ribosomal protein S2 OS=Pseudomonas aeruginosa (strain ATCC 15692 / PAO1 / 1C / PRS 101 / LMG 12228) GN=rpsB PE=3 SV=2	1	2	2	2	9.8	9.8	9.8	27.336	246	246	0	14.025	2494500	4				14	538;639	True;True	578;579;685	1016;1017;1192	2023;2024;2025;2365	2025;2365	2	49
sp|O82851|EFTS_PSEAE	sp|O82851|EFTS_PSEAE	3	3	3	>sp|O82851|EFTS_PSEAE Elongation factor Ts OS=Pseudomonas aeruginosa (strain ATCC 15692 / PAO1 / 1C / PRS 101 / LMG 12228) GN=tsf PE=3 SV=1	1	3	3	3	11.8	11.8	11.8	30.653	289	289	0	16.317	5752000	1				15	240;389;646	True;True;True	263;416;692	430;701;702;1216	849;1349;1350;2437	849;1350;2437
sp|O86428|ILVE_PSEAE	sp|O86428|ILVE_PSEAE	3	3	3	>sp|O86428|ILVE_PSEAE Branched-chain-amino-acid aminotransferase OS=Pseudomonas aeruginosa (strain ATCC 15692 / PAO1 / 1C / PRS 101 / LMG 12228) GN=ilvE PE=1 SV=2	1	3	3	3	11.1	11.1	11.1	34.084	307	307	0	19.191	10224000	9				16	89;91;448	True;True;True	99;101;485	166;167;171;851	379;380;381;382;383;384;385;400;1646	379;400;1646
sp|P04739|FMPO_PSEAE	sp|P04739|FMPO_PSEAE	3	3	3	>sp|P04739|FMPO_PSEAE Fimbrial protein OS=Pseudomonas aeruginosa (strain ATCC 15692 / PAO1 / 1C / PRS 101 / LMG 12228) GN=pilA PE=1 SV=1	1	3	3	3	29.5	29.5	29.5	15.512	149	149	0	39.321	23947000	10				17	261;487;549	True;True;True	285;525;590	464;465;925;926;1034;1035	901;902;903;1771;1772;1773;1774;1775;2057;2058	901;1771;2057
sp|P05384|DBHB_PSEAE	sp|P05384|DBHB_PSEAE	2	2	2	>sp|P05384|DBHB_PSEAE DNA-binding protein HU-beta OS=Pseudomonas aeruginosa (strain ATCC 15692 / PAO1 / 1C / PRS 101 / LMG 12228) GN=hupB PE=1 SV=3	1	2	2	2	32.2	32.2	32.2	9.0865	90	90	0	16.485	10981000	5				18	42;488	True;True	48;526	81;82;927	222;223;224;225;1776	225;1776
sp|P08308|OTCC_PSEAE	sp|P08308|OTCC_PSEAE	9	9	9	>sp|P08308|OTCC_PSEAE Ornithine carbamoyltransferase, catabolic OS=Pseudomonas aeruginosa (strain ATCC 15692 / PAO1 / 1C / PRS 101 / LMG 12228) GN=arcB PE=1 SV=3	1	9	9	9	28.3	28.3	28.3	38.108	336	336	0	64.292	95570000	43				19	149;165;271;390;424;436;442;461;657	True;True;True;True;True;True;True;True;True	165;166;183;184;296;417;458;459;471;477;478;498;703	277;278;279;280;303;304;305;306;307;486;703;704;775;776;777;778;826;827;836;837;838;839;872;873;1234;1235	591;592;593;594;595;596;597;630;631;632;633;634;635;636;637;638;639;640;641;936;1351;1352;1501;1502;1503;1504;1505;1506;1605;1606;1607;1623;1624;1625;1626;1627;1628;1684;1685;2468;2469;2470;2471	594;633;936;1351;1502;1605;1628;1684;2470	3;4;5;6;7	101;139;146;169;261
sp|P09591|EFTU_PSEAE	sp|P09591|EFTU_PSEAE	13	13	13	>sp|P09591|EFTU_PSEAE Elongation factor Tu OS=Pseudomonas aeruginosa (strain ATCC 15692 / PAO1 / 1C / PRS 101 / LMG 12228) GN=tufA PE=1 SV=2	1	13	13	13	43.8	43.8	43.8	43.369	397	397	0	157.11	536520000	206				20	11;22;34;97;109;110;206;233;394;423;473;546;613	True;True;True;True;True;True;True;True;True;True;True;True;True	11;12;25;39;40;107;120;121;122;227;256;421;455;456;457;510;587;658	21;22;44;45;65;66;67;68;69;70;179;180;202;203;204;205;206;207;208;209;210;211;373;374;375;376;418;419;420;712;713;766;767;768;769;770;771;772;773;774;892;893;1029;1030;1148;1149	54;55;96;97;98;99;100;101;102;103;104;105;106;107;108;109;149;150;151;152;153;154;155;156;157;158;159;160;161;162;163;164;165;166;167;168;169;170;171;172;173;174;175;176;177;178;179;180;181;182;183;184;185;186;187;188;189;190;191;192;193;194;195;196;197;198;199;200;201;202;412;413;446;447;448;449;450;451;452;453;454;455;456;457;458;459;460;461;462;463;464;465;466;467;468;469;470;471;472;473;474;4…	54;98;156;412;461;475;738;827;1372;1495;1715;2046;2295	8;9;10;11;12	152;177;216;362;372
sp|P11221|OPRI_PSEAE	sp|P11221|OPRI_PSEAE	1	1	1	>sp|P11221|OPRI_PSEAE Major outer membrane lipoprotein OS=Pseudomonas aeruginosa (strain ATCC 15692 / PAO1 / 1C / PRS 101 / LMG 12228) GN=oprI PE=3 SV=1	1	1	1	1	12	12	12	8.8348	83	83	0	10.169	2348200	7				21	388	TRUE	415	699;700	1342;1343;1344;1345;1346;1347;1348	1343
sp|P11436|AMIE_PSEAE	sp|P11436|AMIE_PSEAE	3	3	3	>sp|P11436|AMIE_PSEAE Aliphatic amidase OS=Pseudomonas aeruginosa (strain ATCC 15692 / PAO1 / 1C / PRS 101 / LMG 12228) GN=amiE PE=1 SV=2	1	3	3	3	11.6	11.6	11.6	38.494	346	346	0	20.71	9855600	4				22	63;304;379	True;True;True	72;330;406	121;553;554;686	303;1086;1087;1319	303;1086;1319
sp|P13794|PORF_PSEAE	sp|P13794|PORF_PSEAE	6	6	6	>sp|P13794|PORF_PSEAE Outer membrane porin F OS=Pseudomonas aeruginosa (strain ATCC 15692 / PAO1 / 1C / PRS 101 / LMG 12228) GN=oprF PE=1 SV=1	1	6	6	6	21.7	21.7	21.7	37.639	350	350	0	61.379	203330000	57				23	122;437;476;480;565;603	True;True;True;True;True;True	136;472;513;517;607;647	232;233;828;904;905;910;911;1063;1064;1124;1125;1126;1127	508;509;510;511;512;513;514;515;516;517;518;519;520;521;522;523;1608;1729;1730;1731;1732;1733;1734;1735;1736;1742;1743;1744;1745;1746;2129;2130;2131;2132;2133;2134;2135;2136;2137;2138;2139;2239;2240;2241;2242;2243;2244;2245;2246;2247;2248;2249;2250;2251;2252;2253;2254	508;1608;1732;1742;2131;2241
sp|P13981|ARCA_PSEAE	sp|P13981|ARCA_PSEAE	18	18	18	>sp|P13981|ARCA_PSEAE Arginine deiminase OS=Pseudomonas aeruginosa (strain ATCC 15692 / PAO1 / 1C / PRS 101 / LMG 12228) GN=arcA PE=1 SV=2	1	18	18	18	51.2	51.2	51.2	46.435	418	418	0	190.69	240390000	108				24	28;102;113;144;162;204;291;305;307;315;449;456;462;518;528;529;586;627	True;True;True;True;True;True;True;True;True;True;True;True;True;True;True;True;True;True	32;112;125;159;160;180;225;317;331;333;341;486;493;499;558;568;569;630;673	54;55;187;188;216;217;269;270;271;298;299;369;370;532;533;555;556;559;560;571;852;853;863;864;874;875;980;981;998;999;1000;1001;1002;1003;1004;1099;1174;1175	134;135;424;425;426;427;428;429;482;483;484;485;577;578;579;580;581;582;619;620;621;622;623;726;727;728;729;730;1057;1058;1088;1089;1092;1093;1094;1095;1121;1647;1648;1649;1650;1651;1652;1667;1668;1669;1670;1671;1672;1673;1686;1687;1688;1689;1690;1912;1913;1914;1915;1971;1972;1973;1974;1975;1976;1977;1978;1979;1980;1981;1982;1983;1984;1985;1986;1987;1988;1989;1990;1991;1992;1993;1994;1995;1996;19…	135;425;484;580;622;727;1057;1089;1093;1121;1648;1671;1687;1913;1973;1988;2202;2342	13	316
sp|P13982|ARCC_PSEAE	sp|P13982|ARCC_PSEAE	3	3	3	>sp|P13982|ARCC_PSEAE Carbamate kinase OS=Pseudomonas aeruginosa (strain ATCC 15692 / PAO1 / 1C / PRS 101 / LMG 12228) GN=arcC PE=3 SV=1	1	3	3	3	12.3	12.3	12.3	33.08	310	310	0	31.008	3799700	6				25	31;95;612	True;True;True	35;105;657	60;175;176;1147	143;405;406;407;408;2288	143;407;2288
sp|P15276|ALGP_PSEAE	sp|P15276|ALGP_PSEAE	1	1	1	>sp|P15276|ALGP_PSEAE Transcriptional regulatory protein AlgP OS=Pseudomonas aeruginosa (strain ATCC 15692 / PAO1 / 1C / PRS 101 / LMG 12228) GN=algP PE=4 SV=2	1	1	1	1	4	4	4	34.49	352	352	0	10.358	3338600	1				26	158	TRUE	176	294	615	615
sp|P28810|MMSA_PSEAE	sp|P28810|MMSA_PSEAE	1	1	1	>sp|P28810|MMSA_PSEAE Methylmalonate-semialdehyde dehydrogenase [acylating] OS=Pseudomonas aeruginosa (strain ATCC 15692 / PAO1 / 1C / PRS 101 / LMG 12228) GN=mmsA PE=1 SV=2	1	1	1	1	3.4	3.4	3.4	53.663	497	497	0	9.0035	4059500	3				27	352	TRUE	378	640;641	1252;1253;1254	1253
sp|P30718|CH60_PSEAE	sp|P30718|CH60_PSEAE	22	22	22	>sp|P30718|CH60_PSEAE 60 kDa chaperonin OS=Pseudomonas aeruginosa (strain ATCC 15692 / PAO1 / 1C / PRS 101 / LMG 12228) GN=groL PE=1 SV=3	1	22	22	22	57.2	57.2	57.2	57.085	547	547	0	224.76	286660000	123				28	6;25;32;52;53;58;59;78;79;80;107;154;156;169;192;232;317;416;464;467;490;572	True;True;True;True;True;True;True;True;True;True;True;True;True;True;True;True;True;True;True;True;True;True	6;28;29;36;37;58;59;65;66;67;87;88;89;117;118;171;172;174;188;189;213;255;343;446;447;501;504;528;614;615	10;11;48;49;50;51;61;62;63;95;96;97;98;108;109;110;111;112;113;114;115;116;149;150;151;152;153;193;194;195;196;197;286;287;288;289;291;312;313;314;351;352;416;417;574;575;751;752;753;754;877;878;882;883;929;930;1071;1072;1073	25;26;27;28;29;30;31;32;33;113;114;115;116;117;118;119;120;121;122;123;124;125;126;127;128;129;130;131;144;145;146;147;245;246;247;248;249;250;251;252;253;254;255;256;273;274;275;276;277;278;279;280;281;282;283;284;285;286;287;288;289;290;291;292;293;294;295;296;297;353;354;355;356;357;434;435;436;437;438;439;605;606;607;608;609;610;612;647;648;649;698;699;700;701;816;817;818;819;820;1124;1125;14…	26;114;147;250;255;278;281;354;355;357;434;607;612;649;701;820;1124;1444;1692;1697;1778;2148	14;15;16;17;18;19;20;21	16;69;114;166;233;267;288;389
sp|P37798|ACCC_PSEAE	sp|P37798|ACCC_PSEAE	4	4	4	>sp|P37798|ACCC_PSEAE Biotin carboxylase OS=Pseudomonas aeruginosa (strain ATCC 15692 / PAO1 / 1C / PRS 101 / LMG 12228) GN=accC PE=1 SV=1	1	4	4	4	10.7	10.7	10.7	48.887	449	449	0	28.372	5058100	6				29	160;428;493;583	True;True;True;True	178;463;531;627	296;813;934;1093;1094	617;1584;1785;2192;2193;2194;2195	617;1584;1785;2194
sp|P37799|BCCP_PSEAE	sp|P37799|BCCP_PSEAE	8	8	8	>sp|P37799|BCCP_PSEAE Biotin carboxyl carrier protein of acetyl-CoA carboxylase OS=Pseudomonas aeruginosa (strain ATCC 15692 / PAO1 / 1C / PRS 101 / LMG 12228) GN=accB PE=3 SV=1	1	8	8	8	62.2	62.2	62.2	16.455	156	156	0	92.385	600260000	106				30	5;308;309;350;351;370;507;519	True;True;True;True;True;True;True;True	5;334;335;376;377;397;545;546;559	8;9;561;562;563;564;636;637;638;639;670;954;955;956;982;983;984;985;986	11;12;13;14;15;16;17;18;19;20;21;22;23;24;1096;1097;1098;1099;1100;1101;1102;1103;1235;1236;1237;1238;1239;1240;1241;1242;1243;1244;1245;1246;1247;1248;1249;1250;1251;1296;1297;1814;1815;1816;1817;1818;1819;1820;1821;1822;1823;1824;1825;1826;1827;1828;1829;1830;1831;1832;1833;1834;1835;1836;1837;1838;1839;1840;1916;1917;1918;1919;1920;1921;1922;1923;1924;1925;1926;1927;1928;1929;1930;1931;1932;19…	12;1099;1102;1238;1246;1296;1833;1942	22	87
sp|P43336|PHHC_PSEAE	sp|P43336|PHHC_PSEAE	5	5	5	>sp|P43336|PHHC_PSEAE Aromatic-amino-acid aminotransferase OS=Pseudomonas aeruginosa (strain ATCC 15692 / PAO1 / 1C / PRS 101 / LMG 12228) GN=phhC PE=3 SV=2	1	5	5	5	17.5	17.5	17.5	43.273	399	399	0	40.308	19844000	18				31	9;94;258;314;610	True;True;True;True;True	9;104;282;340;655	15;16;174;460;461;569;570;1143;1144	39;40;403;404;896;897;898;1116;1117;1118;1119;1120;2279;2280;2281;2282;2283;2284	39;404;897;1120;2280
sp|P47204|FTSZ_PSEAE	sp|P47204|FTSZ_PSEAE	1	1	1	>sp|P47204|FTSZ_PSEAE Cell division protein FtsZ OS=Pseudomonas aeruginosa (strain ATCC 15692 / PAO1 / 1C / PRS 101 / LMG 12228) GN=ftsZ PE=1 SV=2	1	1	1	1	4.8	4.8	4.8	41.218	394	394	0	11.333	704520	4				32	624	TRUE	670	1170;1171	2332;2333;2334;2335	2333
sp|P48247|GSA_PSEAE	sp|P48247|GSA_PSEAE	1	1	1	>sp|P48247|GSA_PSEAE Glutamate-1-semialdehyde 2,1-aminomutase OS=Pseudomonas aeruginosa (strain ATCC 15692 / PAO1 / 1C / PRS 101 / LMG 12228) GN=hemL PE=1 SV=2	1	1	1	1	5.2	5.2	5.2	45.397	427	427	0	8.629	1352300	1				33	26	TRUE	30	52	132	132
sp|P53593|SUCC_PSEAE	sp|P53593|SUCC_PSEAE	14	14	14	>sp|P53593|SUCC_PSEAE Succinyl-CoA ligase [ADP-forming] subunit beta OS=Pseudomonas aeruginosa (strain ATCC 15692 / PAO1 / 1C / PRS 101 / LMG 12228) GN=sucC PE=3 SV=2	1	14	14	14	43	43	43	41.542	388	388	0	147.95	104530000	54				34	16;75;84;145;153;256;264;283;333;334;440;452;469;589	True;True;True;True;True;True;True;True;True;True;True;True;True;True	18;84;93;161;170;280;288;309;359;360;475;489;506;633	33;34;142;158;159;272;285;458;470;471;506;507;604;605;606;607;832;833;857;886;887;1102;1103;1104;1105	77;78;79;80;341;342;343;344;363;364;583;604;894;909;910;973;974;975;976;977;978;1162;1163;1164;1165;1166;1167;1168;1169;1170;1614;1615;1616;1617;1618;1619;1620;1657;1703;1704;1705;1706;2206;2207;2208;2209;2210;2211;2212;2213;2214;2215;2216;2217;2218	78;341;363;583;604;894;910;977;1166;1169;1614;1657;1705;2216
sp|P53641|SODF_PSEAE	sp|P53641|SODF_PSEAE	3	3	3	>sp|P53641|SODF_PSEAE Superoxide dismutase [Fe] OS=Pseudomonas aeruginosa (strain ATCC 15692 / PAO1 / 1C / PRS 101 / LMG 12228) GN=sodB PE=3 SV=3	1	3	3	3	21.8	21.8	21.8	21.351	193	193	0	25.054	26732000	11				35	18;544;664	True;True;True	20;585;710	37;38;1025;1026;1246	84;85;86;87;88;2039;2040;2041;2042;2486;2487	84;2041;2486
sp|P72173|AAT_PSEAE	sp|P72173|AAT_PSEAE	5	5	5	>sp|P72173|AAT_PSEAE Aspartate aminotransferase OS=Pseudomonas aeruginosa (strain ATCC 15692 / PAO1 / 1C / PRS 101 / LMG 12228) GN=aspC PE=3 SV=2	1	5	5	5	16.1	16.1	16.1	43.319	398	398	0	39.805	3774900	4				36	43;360;573;630;665	True;True;True;True;True	49;386;616;676;711	83;652;1074;1178;1179;1247	226;1267;2152;2347;2348;2488	226;1267;2152;2348;2488
sp|Q51342|PUR1_PSEAE	sp|Q51342|PUR1_PSEAE	1	1	1	>sp|Q51342|PUR1_PSEAE Amidophosphoribosyltransferase OS=Pseudomonas aeruginosa (strain ATCC 15692 / PAO1 / 1C / PRS 101 / LMG 12228) GN=purF PE=3 SV=3	1	1	1	1	3.4	3.4	3.4	55.369	501	501	0.0055556	5.4504	1654500	1				37	506	TRUE	544	953	1813	1813
sp|Q51422|SYDND_PSEAE	sp|Q51422|SYDND_PSEAE	2	2	2	>sp|Q51422|SYDND_PSEAE Aspartate--tRNA(Asp/Asn) ligase OS=Pseudomonas aeruginosa (strain ATCC 15692 / PAO1 / 1C / PRS 101 / LMG 12228) GN=aspS PE=1 SV=2	1	2	2	2	5.2	5.2	5.2	66.207	591	591	0	16.516	976150	2				38	289;542	True;True	315;583	529;1023	1054;2037	1054;2037	23	565
sp|Q51561|RPOB_PSEAE	sp|Q51561|RPOB_PSEAE	6	6	6	>sp|Q51561|RPOB_PSEAE DNA-directed RNA polymerase subunit beta OS=Pseudomonas aeruginosa (strain ATCC 15692 / PAO1 / 1C / PRS 101 / LMG 12228) GN=rpoB PE=3 SV=2	1	6	6	6	6.8	6.8	6.8	150.84	1357	1357	0	44.602	17427000	14				39	30;46;299;341;475;510	True;True;True;True;True;True	34;52;325;367;512;549	58;59;86;87;544;545;620;902;903;961	139;140;141;142;230;231;232;233;234;1074;1075;1205;1726;1727;1728;1851;1852	142;232;1075;1205;1728;1851
sp|Q51567|SUCD_PSEAE	sp|Q51567|SUCD_PSEAE	6	6	6	>sp|Q51567|SUCD_PSEAE Succinyl-CoA ligase [ADP-forming] subunit alpha OS=Pseudomonas aeruginosa (strain ATCC 15692 / PAO1 / 1C / PRS 101 / LMG 12228) GN=sucD PE=3 SV=2	1	6	6	6	26.8	26.8	26.8	30.266	295	295	0	42.083	22850000	14				40	41;62;117;163;202;496	True;True;True;True;True;True	47;71;131;181;223;534	79;80;120;226;300;301;365;366;939	218;219;220;221;302;502;624;625;626;627;720;721;722;1791	219;302;502;625;722;1791
sp|Q59636|NDK_PSEAE	sp|Q59636|NDK_PSEAE	1	1	1	>sp|Q59636|NDK_PSEAE Nucleoside diphosphate kinase OS=Pseudomonas aeruginosa (strain ATCC 15692 / PAO1 / 1C / PRS 101 / LMG 12228) GN=ndk PE=3 SV=2	1	1	1	1	6.3	6.3	6.3	15.592	143	143	0	6.1369	1518600	1				41	451	TRUE	488	856	1656	1656
sp|Q59637|ODP1_PSEAE	sp|Q59637|ODP1_PSEAE	10	10	10	>sp|Q59637|ODP1_PSEAE Pyruvate dehydrogenase E1 component OS=Pseudomonas aeruginosa (strain ATCC 15692 / PAO1 / 1C / PRS 101 / LMG 12228) GN=aceE PE=3 SV=2	1	10	10	10	11.9	11.9	11.9	99.563	882	882	0	66.8	31689000	17				42	99;106;119;143;188;267;290;301;497;504	True;True;True;True;True;True;True;True;True;True	109;116;133;158;209;291;316;327;535;542	182;192;228;268;344;345;475;476;530;531;548;549;940;941;951	418;433;504;576;688;689;914;915;1055;1056;1080;1081;1792;1793;1794;1809;1810;1811	418;433;504;576;689;915;1056;1080;1794;1811
sp|Q59638|ODP2_PSEAE	sp|Q59638|ODP2_PSEAE	5	5	5	>sp|Q59638|ODP2_PSEAE Dihydrolipoyllysine-residue acetyltransferase component of pyruvate dehydrogenase complex OS=Pseudomonas aeruginosa (strain ATCC 15692 / PAO1 / 1C / PRS 101 / LMG 12228) GN=aceF PE=2 SV=2	1	5	5	5	10.6	10.6	10.6	56.708	547	547	0	41.678	6078300	6				43	150;170;340;392;502	True;True;True;True;True	167;190;366;419;540	281;315;619;709;948;949	598;650;1204;1362;1805;1806	598;650;1204;1362;1806
sp|Q9HT16|ATPF_PSEAE	sp|Q9HT16|ATPF_PSEAE	2	2	2	>sp|Q9HT16|ATPF_PSEAE ATP synthase subunit b OS=Pseudomonas aeruginosa (strain ATCC 15692 / PAO1 / 1C / PRS 101 / LMG 12228) GN=atpF PE=3 SV=1	1	2	2	2	15.4	15.4	15.4	16.956	156	156	0	15.475	2950800	3				44	67;71	True;True	76;80	128;129;137	316;317;336	317;336
sp|Q9HT17|ATPD_PSEAE	sp|Q9HT17|ATPD_PSEAE	1	1	1	>sp|Q9HT17|ATPD_PSEAE ATP synthase subunit delta OS=Pseudomonas aeruginosa (strain ATCC 15692 / PAO1 / 1C / PRS 101 / LMG 12228) GN=atpH PE=3 SV=1	1	1	1	1	8.4	8.4	8.4	19.26	178	178	0	7.9703	234210	1				45	330	TRUE	356	599	1154	1154
sp|Q9HT18|ATPA_PSEAE	sp|Q9HT18|ATPA_PSEAE	14	14	14	>sp|Q9HT18|ATPA_PSEAE ATP synthase subunit alpha OS=Pseudomonas aeruginosa (strain ATCC 15692 / PAO1 / 1C / PRS 101 / LMG 12228) GN=atpA PE=3 SV=1	1	14	14	14	30.4	30.4	30.4	55.393	514	514	0	117.55	101590000	49				46	131;191;197;273;418;431;466;513;514;522;562;580;622;623	True;True;True;True;True;True;True;True;True;True;True;True;True;True	145;212;218;298;449;466;503;552;553;554;562;604;624;668;669	249;250;349;350;358;359;488;489;756;757;817;818;880;881;969;970;971;972;973;974;989;990;1057;1058;1086;1087;1088;1166;1167;1168;1169	549;550;551;696;697;708;709;710;938;939;1452;1453;1454;1592;1593;1594;1695;1696;1897;1898;1899;1900;1901;1902;1903;1904;1905;1906;1956;1957;1958;1959;2092;2093;2094;2172;2173;2174;2175;2176;2177;2178;2179;2180;2181;2327;2328;2329;2330;2331	550;697;709;938;1454;1592;1695;1898;1900;1956;2094;2174;2327;2331	24;25	1;157
sp|Q9HT20|ATPB_PSEAE	sp|Q9HT20|ATPB_PSEAE	10	10	10	>sp|Q9HT20|ATPB_PSEAE ATP synthase subunit beta OS=Pseudomonas aeruginosa (strain ATCC 15692 / PAO1 / 1C / PRS 101 / LMG 12228) GN=atpD PE=3 SV=1	1	10	10	10	30.6	30.6	30.6	49.499	458	458	0	88.139	41869000	25				47	104;121;178;211;228;468;560;561;577;663	True;True;True;True;True;True;True;True;True;True	114;135;198;232;251;505;601;602;603;621;709	190;230;231;327;328;382;410;884;885;1052;1053;1054;1055;1056;1081;1082;1244;1245	431;506;507;665;666;667;668;751;807;1699;1700;1701;1702;2083;2084;2085;2086;2087;2088;2089;2090;2091;2163;2164;2483;2484;2485	431;506;665;751;807;1700;2086;2091;2164;2485	26	225
sp|Q9HTD7|ASPA_PSEAE	sp|Q9HTD7|ASPA_PSEAE	1	1	1	>sp|Q9HTD7|ASPA_PSEAE Aspartate ammonia-lyase OS=Pseudomonas aeruginosa (strain ATCC 15692 / PAO1 / 1C / PRS 101 / LMG 12228) GN=aspA PE=3 SV=1	1	1	1	1	4.2	4.2	4.2	51.069	474	474	0	6.0464	1322800	1				48	358	TRUE	384	649;650	1264;1265	1265
sp|Q9HTV1|RHO_PSEAE	sp|Q9HTV1|RHO_PSEAE	1	1	1	>sp|Q9HTV1|RHO_PSEAE Transcription termination factor Rho OS=Pseudomonas aeruginosa (strain ATCC 15692 / PAO1 / 1C / PRS 101 / LMG 12228) GN=rho PE=3 SV=1	1	1	1	1	3.3	3.3	3.3	47.069	419	419	0	6.3587	681360	1				49	274	TRUE	299	490	940	940
sp|Q9HU21|RMLC_PSEAE	sp|Q9HU21|RMLC_PSEAE	1	1	1	>sp|Q9HU21|RMLC_PSEAE dTDP-4-dehydrorhamnose 3,5-epimerase OS=Pseudomonas aeruginosa (strain ATCC 15692 / PAO1 / 1C / PRS 101 / LMG 12228) GN=rmlC PE=1 SV=1	1	1	1	1	6.6	6.6	6.6	20.766	181	181	0	6.6047	3325000	2				50	321	TRUE	347	583;584	1136;1137	1137
sp|Q9HU65|GLNA_PSEAE	sp|Q9HU65|GLNA_PSEAE	4	4	4	>sp|Q9HU65|GLNA_PSEAE Glutamine synthetase OS=Pseudomonas aeruginosa (strain ATCC 15692 / PAO1 / 1C / PRS 101 / LMG 12228) GN=glnA PE=1 SV=1	1	4	4	4	17.3	17.3	17.3	51.944	469	469	0	40.888	10911000	12				51	51;181;400;447	True;True;True;True	57;202;427;484	93;94;334;722;723;849;850	242;243;244;676;677;1389;1390;1391;1642;1643;1644;1645	243;677;1390;1642	27	377
sp|Q9HU83|HUTU_PSEAE	sp|Q9HU83|HUTU_PSEAE	3	3	3	>sp|Q9HU83|HUTU_PSEAE Urocanate hydratase OS=Pseudomonas aeruginosa (strain ATCC 15692 / PAO1 / 1C / PRS 101 / LMG 12228) GN=hutU PE=1 SV=1	1	3	3	3	7.9	7.9	7.9	61.193	559	559	0	18.775	499470	4				52	39;600;635	True;True;True	45;644;681	76;1120;1187	211;212;2235;2359	211;2235;2359
sp|Q9HUC8|SYR_PSEAE	sp|Q9HUC8|SYR_PSEAE	1	1	1	>sp|Q9HUC8|SYR_PSEAE Arginine--tRNA ligase OS=Pseudomonas aeruginosa (strain ATCC 15692 / PAO1 / 1C / PRS 101 / LMG 12228) GN=argS PE=3 SV=1	1	1	1	1	2	2	2	65.199	587	587	0	7.4244	633390	1				53	534	TRUE	574	1012	2019	2019
sp|Q9HUF1|MSRA_PSEAE	sp|Q9HUF1|MSRA_PSEAE	1	1	1	>sp|Q9HUF1|MSRA_PSEAE Peptide methionine sulfoxide reductase MsrA OS=Pseudomonas aeruginosa (strain ATCC 15692 / PAO1 / 1C / PRS 101 / LMG 12228) GN=msrA PE=3 SV=1	1	1	1	1	5.1	5.1	5.1	23.517	215	215	0	5.8304	2346100	1				54	516	TRUE	556	977	1909	1909
sp|Q9HUM6|PURA_PSEAE	sp|Q9HUM6|PURA_PSEAE	2	2	2	>sp|Q9HUM6|PURA_PSEAE Adenylosuccinate synthetase OS=Pseudomonas aeruginosa (strain ATCC 15692 / PAO1 / 1C / PRS 101 / LMG 12228) GN=purA PE=3 SV=1	1	2	2	2	7	7	7	46.814	430	430	0	18.417	2595300	9				55	533;581	True;True	573;625	1011;1089;1090	2018;2182;2183;2184;2185;2186;2187;2188;2189	2018;2183
sp|Q9HV43|DNAK_PSEAE	sp|Q9HV43|DNAK_PSEAE	4	4	4	>sp|Q9HV43|DNAK_PSEAE Chaperone protein DnaK OS=Pseudomonas aeruginosa (strain ATCC 15692 / PAO1 / 1C / PRS 101 / LMG 12228) GN=dnaK PE=3 SV=1	1	4	4	4	9.9	9.9	9.9	68.402	637	637	0	33.027	14870000	8				56	105;266;459;547	True;True;True;True	115;290;496;588	191;474;868;869;1031;1032	432;913;1679;1680;1681;2052;2053;2054;2055	432;913;1679;2053	28	88
sp|Q9HV59|PNP_PSEAE	sp|Q9HV59|PNP_PSEAE	3	3	3	>sp|Q9HV59|PNP_PSEAE Polyribonucleotide nucleotidyltransferase OS=Pseudomonas aeruginosa (strain ATCC 15692 / PAO1 / 1C / PRS 101 / LMG 12228) GN=pnp PE=3 SV=1	1	3	3	3	4.4	4.4	4.4	75.452	701	701	0	20.083	7526300	8				57	64;120;601	True;True;True	73;134;645	122;123;229;1121;1122	304;305;306;307;308;505;2236;2237	304;505;2237
sp|Q9HVA2|ILVC_PSEAE	sp|Q9HVA2|ILVC_PSEAE	1	1	1	>sp|Q9HVA2|ILVC_PSEAE Ketol-acid reductoisomerase OS=Pseudomonas aeruginosa (strain ATCC 15692 / PAO1 / 1C / PRS 101 / LMG 12228) GN=ilvC PE=1 SV=1	1	1	1	1	5.6	5.6	5.6	36.424	338	338	0	18.767	4910700	5				58	201	TRUE	222	363;364	715;716;717;718;719	716
sp|Q9HVF1|MQO2_PSEAE	sp|Q9HVF1|MQO2_PSEAE	1	1	1	>sp|Q9HVF1|MQO2_PSEAE Probable malate:quinone oxidoreductase 2 OS=Pseudomonas aeruginosa (strain ATCC 15692 / PAO1 / 1C / PRS 101 / LMG 12228) GN=mqo2 PE=3 SV=1	1	1	1	1	4.5	4.5	4.5	55.498	507	507	0.0062893	5.7612	1842300	0				59	187	TRUE	208	342;343	686;687	686
sp|Q9HVN5|CLPB_PSEAE	sp|Q9HVN5|CLPB_PSEAE	4	2	2	>sp|Q9HVN5|CLPB_PSEAE Chaperone protein ClpB OS=Pseudomonas aeruginosa (strain ATCC 15692 / PAO1 / 1C / PRS 101 / LMG 12228) GN=clpB PE=3 SV=1	1	4	2	2	6	3.3	3.3	95.004	854	854	0	13.241	589580	1				60	357;443;521;638	True;False;False;True	383;479;561;684	648;840;988;1191	1263;1629;1955;2364	1263;1629;1955;2364
sp|Q9HVY3|RS9_PSEAE	sp|Q9HVY3|RS9_PSEAE	1	1	1	>sp|Q9HVY3|RS9_PSEAE 30S ribosomal protein S9 OS=Pseudomonas aeruginosa (strain ATCC 15692 / PAO1 / 1C / PRS 101 / LMG 12228) GN=rpsI PE=3 SV=1	1	1	1	1	7.7	7.7	7.7	14.615	130	130	0	6.1142	0	2				61	47	TRUE	53	88;89	235;236	235
sp|Q9HWC8|RL7_PSEAE	sp|Q9HWC8|RL7_PSEAE	1	1	1	>sp|Q9HWC8|RL7_PSEAE 50S ribosomal protein L7/L12 OS=Pseudomonas aeruginosa (strain ATCC 15692 / PAO1 / 1C / PRS 101 / LMG 12228) GN=rplL PE=3 SV=1	1	1	1	1	9	9	9	12.479	122	122	0	6.0132	236740	1				62	86	TRUE	96	163	376	376
sp|Q9HWC9|RPOC_PSEAE	sp|Q9HWC9|RPOC_PSEAE	14	14	14	>sp|Q9HWC9|RPOC_PSEAE DNA-directed RNA polymerase subunit beta OS=Pseudomonas aeruginosa (strain ATCC 15692 / PAO1 / 1C / PRS 101 / LMG 12228) GN=rpoC PE=3 SV=1	1	14	14	14	14.1	14.1	14.1	154.38	1399	1399	0	105.68	26386000	25				63	49;108;137;151;167;265;347;359;380;398;446;492;557;655	True;True;True;True;True;True;True;True;True;True;True;True;True;True	55;119;152;168;186;289;373;385;407;425;483;530;598;701	91;198;199;200;201;261;282;283;309;472;473;632;633;651;687;719;847;848;933;1048;1231	238;239;440;441;442;443;444;445;566;567;599;600;601;644;911;912;1228;1229;1230;1266;1320;1384;1640;1641;1784;2075;2463	238;444;566;601;644;912;1230;1266;1320;1384;1641;1784;2075;2463
sp|Q9HWD1|RS7_PSEAE	sp|Q9HWD1|RS7_PSEAE	1	1	1	>sp|Q9HWD1|RS7_PSEAE 30S ribosomal protein S7 OS=Pseudomonas aeruginosa (strain ATCC 15692 / PAO1 / 1C / PRS 101 / LMG 12228) GN=rpsG PE=3 SV=1	1	1	1	1	7.7	7.7	7.7	17.504	156	156	0.006135	5.6549	0	2				64	316	TRUE	342	572;573	1122;1123	1123
sp|Q9HWD2|EFG1_PSEAE;sp|Q9I244|EFG2_PSEAE	sp|Q9HWD2|EFG1_PSEAE	13;5	13;5	13;5	>sp|Q9HWD2|EFG1_PSEAE Elongation factor G 1 OS=Pseudomonas aeruginosa (strain ATCC 15692 / PAO1 / 1C / PRS 101 / LMG 12228) GN=fusA PE=1 SV=1	2	13	13	13	28.3	28.3	28.3	77.784	706	706;702	0	136.38	79045000	40				65	15;21;134;209;227;229;243;324;346;408;435;633;641	True;True;True;True;True;True;True;True;True;True;True;True;True	16;17;23;24;148;230;250;252;266;350;372;435;436;470;679;687	29;30;31;32;42;43;254;380;409;411;412;435;436;588;589;631;735;736;737;824;825;1183;1184;1195;1196	70;71;72;73;74;75;76;94;95;555;749;804;805;806;808;809;810;811;855;856;857;858;859;1141;1142;1225;1226;1227;1413;1414;1415;1416;1602;1603;1604;2353;2354;2355;2356;2368;2369;2370;2371	70;95;555;749;804;808;855;1141;1227;1415;1604;2353;2368	29;30;31	388;409;666
sp|Q9HWD5|RL3_PSEAE	sp|Q9HWD5|RL3_PSEAE	1	1	1	>sp|Q9HWD5|RL3_PSEAE 50S ribosomal protein L3 OS=Pseudomonas aeruginosa (strain ATCC 15692 / PAO1 / 1C / PRS 101 / LMG 12228) GN=rplC PE=3 SV=1	1	1	1	1	4.7	4.7	4.7	22.591	211	211	0	6.3322	1803800	1				66	621	TRUE	667	1165	2326	2326
sp|Q9HWD8|RL2_PSEAE	sp|Q9HWD8|RL2_PSEAE	2	2	2	>sp|Q9HWD8|RL2_PSEAE 50S ribosomal protein L2 OS=Pseudomonas aeruginosa (strain ATCC 15692 / PAO1 / 1C / PRS 101 / LMG 12228) GN=rplB PE=3 SV=1	1	2	2	2	11.4	11.4	11.4	29.579	273	273	0	17.016	12553000	7				67	76;223	True;True	85;246	143;144;145;146;403;404	345;346;347;348;349;797;798	349;797
sp|Q9HWE2|RL16_PSEAE	sp|Q9HWE2|RL16_PSEAE	3	3	3	>sp|Q9HWE2|RL16_PSEAE 50S ribosomal protein L16 OS=Pseudomonas aeruginosa (strain ATCC 15692 / PAO1 / 1C / PRS 101 / LMG 12228) GN=rplP PE=3 SV=1	1	3	3	3	23.4	23.4	23.4	15.401	137	137	0	21.081	7018500	4				68	378;602;618	True;True;True	405;646;664	685;1123;1160;1161	1318;2238;2320;2321	1318;2238;2320
sp|Q9HWE4|RS17_PSEAE	sp|Q9HWE4|RS17_PSEAE	1	1	1	>sp|Q9HWE4|RS17_PSEAE 30S ribosomal protein S17 OS=Pseudomonas aeruginosa (strain ATCC 15692 / PAO1 / 1C / PRS 101 / LMG 12228) GN=rpsQ PE=3 SV=1	1	1	1	1	11.4	11.4	11.4	10.086	88	88	0	6.6264	785280	1				69	87	TRUE	97	164	377	377
sp|Q9HWE5|RL14_PSEAE	sp|Q9HWE5|RL14_PSEAE	1	1	1	>sp|Q9HWE5|RL14_PSEAE 50S ribosomal protein L14 OS=Pseudomonas aeruginosa (strain ATCC 15692 / PAO1 / 1C / PRS 101 / LMG 12228) GN=rplN PE=3 SV=1	1	1	1	1	9.8	9.8	9.8	13.412	122	122	0	8.082	3030900	2				70	168	TRUE	187	310;311	645;646	645
sp|Q9HWE8|RS14_PSEAE	sp|Q9HWE8|RS14_PSEAE	1	1	1	>sp|Q9HWE8|RS14_PSEAE 30S ribosomal protein S14 OS=Pseudomonas aeruginosa (strain ATCC 15692 / PAO1 / 1C / PRS 101 / LMG 12228) GN=rpsN PE=3 SV=1	1	1	1	1	12.9	12.9	12.9	11.565	101	101	0	7.2534	206260	2				71	35	TRUE	41	71	203;204	203
sp|Q9HWF2|RS5_PSEAE	sp|Q9HWF2|RS5_PSEAE	1	1	1	>sp|Q9HWF2|RS5_PSEAE 30S ribosomal protein S5 OS=Pseudomonas aeruginosa (strain ATCC 15692 / PAO1 / 1C / PRS 101 / LMG 12228) GN=rpsE PE=3 SV=1	1	1	1	1	8.4	8.4	8.4	17.625	166	166	0	8.1612	1176700	2				72	83	TRUE	92	157	361;362	362
sp|Q9HWF7|RS13_PSEAE	sp|Q9HWF7|RS13_PSEAE	1	1	1	>sp|Q9HWF7|RS13_PSEAE 30S ribosomal protein S13 OS=Pseudomonas aeruginosa (strain ATCC 15692 / PAO1 / 1C / PRS 101 / LMG 12228) GN=rpsM PE=3 SV=1	1	1	1	1	11	11	11	13.265	118	118	0	7.901	2817100	2				73	270	TRUE	295	484;485	934;935	935
sp|Q9HXN2|PUR4_PSEAE	sp|Q9HXN2|PUR4_PSEAE	1	1	1	>sp|Q9HXN2|PUR4_PSEAE Phosphoribosylformylglycinamidine synthase OS=Pseudomonas aeruginosa (strain ATCC 15692 / PAO1 / 1C / PRS 101 / LMG 12228) GN=purL PE=3 SV=1	1	1	1	1	1.1	1.1	1.1	140.65	1298	1298	0	6.4748	237990	1				74	619	TRUE	665	1162	2322	2322
sp|Q9HYR9|CLPP2_PSEAE	sp|Q9HYR9|CLPP2_PSEAE	1	1	1	>sp|Q9HYR9|CLPP2_PSEAE ATP-dependent Clp protease proteolytic subunit 2 OS=Pseudomonas aeruginosa (strain ATCC 15692 / PAO1 / 1C / PRS 101 / LMG 12228) GN=clpP2 PE=3 SV=1	1	1	1	1	6	6	6	22.142	201	201	0	8.4592	268300	1				75	252	TRUE	275	449	884	884
sp|Q9HZ71|RS1_PSEAE	sp|Q9HZ71|RS1_PSEAE	6	6	6	>sp|Q9HZ71|RS1_PSEAE 30S ribosomal protein S1 OS=Pseudomonas aeruginosa (strain ATCC 15692 / PAO1 / 1C / PRS 101 / LMG 12228) GN=rpsA PE=3 SV=1	1	6	6	6	14.5	14.5	14.5	61.869	559	559	0	52.731	20980000	15				76	20;128;189;200;463;470	True;True;True;True;True;True	22;142;210;221;500;507	40;41;243;244;346;347;362;876;888;889	90;91;92;93;541;542;543;690;691;692;693;694;714;1691;1707;1708	92;543;693;714;1691;1707
sp|Q9HZ76|WBPE_PSEAE	sp|Q9HZ76|WBPE_PSEAE	1	1	1	>sp|Q9HZ76|WBPE_PSEAE UDP-2-acetamido-2-deoxy-3-oxo-D-glucuronate aminotransferase OS=Pseudomonas aeruginosa (strain ATCC 15692 / PAO1 / 1C / PRS 101 / LMG 12228) GN=wbpE PE=1 SV=1	1	1	1	1	5	5	5	38.924	359	359	0	8.7078	2526200	3				77	648	TRUE	694	1218;1219	2439;2440;2441	2439
sp|Q9HZA7|ACCD_PSEAE	sp|Q9HZA7|ACCD_PSEAE	1	1	1	>sp|Q9HZA7|ACCD_PSEAE Acetyl-coenzyme A carboxylase carboxyl transferase subunit beta OS=Pseudomonas aeruginosa (strain ATCC 15692 / PAO1 / 1C / PRS 101 / LMG 12228) GN=accD PE=1 SV=1	1	1	1	1	5.9	5.9	5.9	31.843	290	290	0	6.5236	3323900	2				78	323	TRUE	349	586;587	1139;1140	1140
sp|Q9HZE0|DHE2_PSEAE	sp|Q9HZE0|DHE2_PSEAE	12	12	12	>sp|Q9HZE0|DHE2_PSEAE NAD-specific glutamate dehydrogenase OS=Pseudomonas aeruginosa (strain ATCC 15692 / PAO1 / 1C / PRS 101 / LMG 12228) GN=gdhB PE=1 SV=1	1	12	12	12	10.2	10.2	10.2	182.64	1620	1620	0	94.791	22502000	30				79	36;66;96;146;220;342;369;403;578;595;645;661	True;True;True;True;True;True;True;True;True;True;True;True	42;75;106;162;242;368;396;430;622;639;691;707	72;126;127;177;178;273;398;621;622;668;669;727;728;1083;1112;1214;1215;1241	205;311;312;313;314;315;409;410;411;584;780;1206;1207;1208;1209;1294;1295;1397;1398;1399;1400;1401;1402;2165;2166;2226;2227;2435;2436;2480	205;313;410;584;780;1207;1295;1398;2165;2226;2436;2480
sp|Q9HZJ2|FADB_PSEAE	sp|Q9HZJ2|FADB_PSEAE	4	4	4	>sp|Q9HZJ2|FADB_PSEAE Fatty acid oxidation complex subunit alpha OS=Pseudomonas aeruginosa (strain ATCC 15692 / PAO1 / 1C / PRS 101 / LMG 12228) GN=fadB PE=3 SV=1	1	4	4	4	9.8	9.8	9.8	76.953	715	715	0	33.741	3477300	5				80	199;543;574;594	True;True;True;True	220;584;617;638	361;1024;1075;1111	713;2038;2153;2224;2225	713;2038;2153;2225
sp|Q9HZP6|ETFB_PSEAE	sp|Q9HZP6|ETFB_PSEAE	3	3	3	>sp|Q9HZP6|ETFB_PSEAE Electron transfer flavoprotein subunit beta OS=Pseudomonas aeruginosa (strain ATCC 15692 / PAO1 / 1C / PRS 101 / LMG 12228) GN=etfB PE=3 SV=1	1	3	3	3	20.5	20.5	20.5	26.376	249	249	0	19.91	2868300	2				81	37;141;571	True;True;True	43;156;613	73;265;1070	206;571;2146	206;571;2146
sp|Q9I0A2|RL20_PSEAE	sp|Q9I0A2|RL20_PSEAE	1	1	1	>sp|Q9I0A2|RL20_PSEAE 50S ribosomal protein L20 OS=Pseudomonas aeruginosa (strain ATCC 15692 / PAO1 / 1C / PRS 101 / LMG 12228) GN=rplT PE=3 SV=1	1	1	1	1	7.6	7.6	7.6	13.365	118	118	0	5.8497	3425800	2				82	1	TRUE	1	1;2	1;2	2
sp|Q9I0J6|NUOG_PSEAE	sp|Q9I0J6|NUOG_PSEAE	2	2	2	>sp|Q9I0J6|NUOG_PSEAE NADH-quinone oxidoreductase subunit G OS=Pseudomonas aeruginosa (strain ATCC 15692 / PAO1 / 1C / PRS 101 / LMG 12228) GN=nuoG PE=3 SV=1	1	2	2	2	2.8	2.8	2.8	98.999	905	905	0	15.058	2754400	3				83	74;385	True;True	83;412	141;693;694	340;1327;1328	340;1328
sp|Q9I0J9|NUOCD_PSEAE	sp|Q9I0J9|NUOCD_PSEAE	1	1	1	>sp|Q9I0J9|NUOCD_PSEAE NADH-quinone oxidoreductase subunit C/D OS=Pseudomonas aeruginosa (strain ATCC 15692 / PAO1 / 1C / PRS 101 / LMG 12228) GN=nuoC PE=3 SV=1	1	1	1	1	2.2	2.2	2.2	68.322	593	593	0.0058824	5.5905	1657300	0				84	127	TRUE	141	242	540	540
sp|Q9I0K4|ACEA_PSEAE	sp|Q9I0K4|ACEA_PSEAE	8	8	8	>sp|Q9I0K4|ACEA_PSEAE Isocitrate lyase OS=Pseudomonas aeruginosa (strain ATCC 15692 / PAO1 / 1C / PRS 101 / LMG 12228) GN=PA2634 PE=1 SV=1	1	8	8	8	19.6	19.6	19.6	58.886	531	531	0	96.064	29071000	21				85	147;326;367;401;433;472;524;620	True;True;True;True;True;True;True;True	163;352;394;428;468;509;564;666	274;275;592;593;665;724;725;821;822;891;993;1163;1164	585;586;587;588;1146;1147;1291;1392;1393;1394;1395;1598;1599;1710;1962;1963;1964;1965;2323;2324;2325	588;1146;1291;1395;1598;1710;1962;2324
sp|Q9I0Q0|PQSH_PSEAE	sp|Q9I0Q0|PQSH_PSEAE	1	1	1	>sp|Q9I0Q0|PQSH_PSEAE 2-heptyl-3-hydroxy-4(1H)-quinolone synthase OS=Pseudomonas aeruginosa (strain ATCC 15692 / PAO1 / 1C / PRS 101 / LMG 12228) GN=pqsH PE=3 SV=1	1	1	1	1	7.6	7.6	7.6	42.081	382	382	0	6.3622	1104800	2				86	73	TRUE	82	139;140	338;339	338
sp|Q9I1L9|DLDH1_PSEAE	sp|Q9I1L9|DLDH1_PSEAE	2	2	2	>sp|Q9I1L9|DLDH1_PSEAE Dihydrolipoyl dehydrogenase OS=Pseudomonas aeruginosa (strain ATCC 15692 / PAO1 / 1C / PRS 101 / LMG 12228) GN=lpdV PE=1 SV=1	1	2	2	2	6	6	6	48.588	464	464	0	14.004	5413500	1				87	139;584	True;True	154;628	263;1095;1096	569;2196;2197	569;2196
sp|Q9I1M1|ODBB_PSEAE	sp|Q9I1M1|ODBB_PSEAE	1	1	1	>sp|Q9I1M1|ODBB_PSEAE 2-oxoisovalerate dehydrogenase subunit beta OS=Pseudomonas aeruginosa (strain ATCC 15692 / PAO1 / 1C / PRS 101 / LMG 12228) GN=bkdA2 PE=3 SV=1	1	1	1	1	4.3	4.3	4.3	38.324	350	350	0	6.2568	447890	2				88	503	TRUE	541	950	1807;1808	1808
sp|Q9I1M2|ODBA_PSEAE	sp|Q9I1M2|ODBA_PSEAE	1	1	1	>sp|Q9I1M2|ODBA_PSEAE 2-oxoisovalerate dehydrogenase subunit alpha OS=Pseudomonas aeruginosa (strain ATCC 15692 / PAO1 / 1C / PRS 101 / LMG 12228) GN=bkdA1 PE=3 SV=1	1	1	1	1	3.2	3.2	3.2	45.256	410	410	0	7.4727	809360	1				89	438	TRUE	473	829	1609	1609
sp|Q9I2A8|ATOB_PSEAE	sp|Q9I2A8|ATOB_PSEAE	2	2	2	>sp|Q9I2A8|ATOB_PSEAE Acetyl-CoA acetyltransferase OS=Pseudomonas aeruginosa (strain ATCC 15692 / PAO1 / 1C / PRS 101 / LMG 12228) GN=atoB PE=3 SV=1	1	2	2	2	6.4	6.4	6.4	40.405	393	393	0	12.287	1136700	1				90	23;417	True;True	26;448	46;755	110;1451	110;1451	32	82
sp|Q9I2V5|ACNB_PSEAE	sp|Q9I2V5|ACNB_PSEAE	13	13	13	>sp|Q9I2V5|ACNB_PSEAE Aconitate hydratase B OS=Pseudomonas aeruginosa (strain ATCC 15692 / PAO1 / 1C / PRS 101 / LMG 12228) GN=acnB PE=3 SV=1	1	13	13	13	21.3	21.3	21.3	93.627	869	869	0	112.71	39339000	32				91	14;101;112;198;337;377;383;402;421;483;517;541;615	True;True;True;True;True;True;True;True;True;True;True;True;True	15;111;124;219;363;404;410;429;452;453;520;557;582;660	27;28;185;186;214;215;360;610;611;682;683;684;690;726;760;761;762;763;764;917;978;979;1022;1152;1153	67;68;69;421;422;423;479;480;481;711;712;1173;1174;1175;1176;1315;1316;1317;1323;1396;1457;1458;1459;1460;1461;1462;1755;1910;1911;2036;2304;2305;2306	67;423;481;712;1173;1316;1323;1396;1461;1755;1910;2036;2304	33;34	411;423
sp|Q9I3C5|HTPG_PSEAE	sp|Q9I3C5|HTPG_PSEAE	1	1	1	>sp|Q9I3C5|HTPG_PSEAE Chaperone protein HtpG OS=Pseudomonas aeruginosa (strain ATCC 15692 / PAO1 / 1C / PRS 101 / LMG 12228) GN=htpG PE=3 SV=1	1	1	1	1	1.6	1.6	1.6	71.667	634	634	0.00625	5.7529	790840	0				92	591	TRUE	635	1108	2221	2221
sp|Q9I3D1|DLDH2_PSEAE	sp|Q9I3D1|DLDH2_PSEAE	12	12	12	>sp|Q9I3D1|DLDH2_PSEAE Dihydrolipoyl dehydrogenase OS=Pseudomonas aeruginosa (strain ATCC 15692 / PAO1 / 1C / PRS 101 / LMG 12228) GN=lpdG PE=3 SV=1	1	12	12	12	35.8	35.8	35.8	50.164	478	478	0	113.24	55473000	33				93	13;48;56;69;72;176;230;336;349;439;477;545	True;True;True;True;True;True;True;True;True;True;True;True	14;54;62;78;81;196;253;362;375;474;514;586	25;26;90;103;104;133;134;138;325;413;414;609;635;830;831;906;907;1027;1028	60;61;62;63;64;65;66;237;266;267;327;328;329;330;331;332;337;663;812;813;814;1172;1232;1233;1234;1610;1611;1612;1613;1737;1738;1739;2043;2044	63;237;267;327;337;663;813;1172;1233;1610;1737;2044
sp|Q9I3D2|ODO2_PSEAE	sp|Q9I3D2|ODO2_PSEAE	1	1	1	>sp|Q9I3D2|ODO2_PSEAE Dihydrolipoyllysine-residue succinyltransferase component of 2-oxoglutarate dehydrogenase complex OS=Pseudomonas aeruginosa (strain ATCC 15692 / PAO1 / 1C / PRS 101 / LMG 12228) GN=sucB PE=3 SV=1	1	1	1	1	4.4	4.4	4.4	42.887	409	409	0.0062112	5.7471	0	2				94	306	TRUE	332	557;558	1090;1091	1090
sp|Q9I3F5|ACNA_PSEAE	sp|Q9I3F5|ACNA_PSEAE	15	15	15	>sp|Q9I3F5|ACNA_PSEAE Aconitate hydratase A OS=Pseudomonas aeruginosa (strain ATCC 15692 / PAO1 / 1C / PRS 101 / LMG 12228) GN=acnA PE=3 SV=1	1	15	15	15	26.5	26.5	26.5	99.147	910	910	0	134.59	64722000	48				95	38;136;186;247;284;322;363;539;554;559;590;598;599;629;660	True;True;True;True;True;True;True;True;True;True;True;True;True;True;True	44;151;207;270;310;348;389;580;595;600;634;642;643;675;706	74;75;259;260;340;341;441;508;509;585;655;656;1018;1019;1020;1043;1044;1050;1051;1106;1107;1116;1117;1118;1119;1177;1239;1240	207;208;209;210;560;561;562;563;564;565;684;685;865;979;980;1138;1270;1271;1272;1273;2026;2027;2028;2029;2030;2031;2032;2033;2069;2070;2071;2077;2078;2079;2080;2081;2082;2219;2220;2231;2232;2233;2234;2346;2475;2476;2477;2478;2479	208;562;684;865;980;1138;1270;2029;2071;2080;2220;2232;2234;2346;2476	35	88
sp|Q9I4Z4|PAL_PSEAE	sp|Q9I4Z4|PAL_PSEAE	1	1	1	>sp|Q9I4Z4|PAL_PSEAE Peptidoglycan-associated lipoprotein OS=Pseudomonas aeruginosa (strain ATCC 15692 / PAO1 / 1C / PRS 101 / LMG 12228) GN=pal PE=3 SV=1	1	1	1	1	11.3	11.3	11.3	17.925	168	168	0	11.186	2757700	1				96	658	TRUE	704	1236	2472	2472
sp|Q9I558|ACSA1_PSEAE	sp|Q9I558|ACSA1_PSEAE	3	3	3	>sp|Q9I558|ACSA1_PSEAE Acetyl-coenzyme A synthetase 1 OS=Pseudomonas aeruginosa (strain ATCC 15692 / PAO1 / 1C / PRS 101 / LMG 12228) GN=acsA1 PE=3 SV=1	1	3	3	3	7.4	7.4	7.4	71.762	651	651	0	29.515	4476600	6				97	61;142;604	True;True;True	70;157;648	119;266;267;1128	301;572;573;574;575;2255	301;574;2255
sp|Q9I576|HPPD_PSEAE	sp|Q9I576|HPPD_PSEAE	7	7	7	>sp|Q9I576|HPPD_PSEAE 4-hydroxyphenylpyruvate dioxygenase OS=Pseudomonas aeruginosa (strain ATCC 15692 / PAO1 / 1C / PRS 101 / LMG 12228) GN=hpd PE=3 SV=1	1	7	7	7	24.6	24.6	24.6	39.912	357	357	0	66.346	11989000	15				98	44;179;395;430;558;587;647	True;True;True;True;True;True;True	50;199;200;422;465;599;631;693	84;329;330;331;714;815;816;1049;1100;1217	227;669;670;671;672;673;1378;1586;1587;1588;1589;1590;1591;2076;2204;2438	227;671;1378;1587;2076;2204;2438	36	269
sp|Q9I589|CBPD_PSEAE	sp|Q9I589|CBPD_PSEAE	1	1	1	>sp|Q9I589|CBPD_PSEAE Chitin-binding protein CbpD OS=Pseudomonas aeruginosa (strain ATCC 15692 / PAO1 / 1C / PRS 101 / LMG 12228) GN=cbpD PE=1 SV=1	1	1	1	1	3.6	3.6	3.6	41.916	389	389	0	10.444	4228300	3				99	70	TRUE	79	135;136	333;334;335	335
sp|Q9I5G9|Y760_PSEAE	sp|Q9I5G9|Y760_PSEAE	1	1	1	>sp|Q9I5G9|Y760_PSEAE Uncharacterized protein PA0760 OS=Pseudomonas aeruginosa (strain ATCC 15692 / PAO1 / 1C / PRS 101 / LMG 12228) GN=PA0760 PE=3 SV=1	1	1	1	1	9.5	9.5	9.5	10.147	84	84	0.0057143	5.51	0	1				100	422	TRUE	454	765	1463	1463	37	73
sp|Q9I5Y1|ALF_PSEAE	sp|Q9I5Y1|ALF_PSEAE	1	1	1	>sp|Q9I5Y1|ALF_PSEAE Fructose-bisphosphate aldolase OS=Pseudomonas aeruginosa (strain ATCC 15692 / PAO1 / 1C / PRS 101 / LMG 12228) GN=fba PE=3 SV=1	1	1	1	1	3.4	3.4	3.4	38.573	354	354	0	6.4727	638660	2				101	172	TRUE	192	318	653;654	653
sp|Q9I5Y4|PGK_PSEAE	sp|Q9I5Y4|PGK_PSEAE	1	1	1	>sp|Q9I5Y4|PGK_PSEAE Phosphoglycerate kinase OS=Pseudomonas aeruginosa (strain ATCC 15692 / PAO1 / 1C / PRS 101 / LMG 12228) GN=pgk PE=3 SV=1	1	1	1	1	4.4	4.4	4.4	40.404	387	387	0	6.6946	627870	1				102	555	TRUE	596	1045	2072	2072
sp|Q9I636|MASZ_PSEAE	sp|Q9I636|MASZ_PSEAE	1	1	1	>sp|Q9I636|MASZ_PSEAE Malate synthase G OS=Pseudomonas aeruginosa (strain ATCC 15692 / PAO1 / 1C / PRS 101 / LMG 12228) GN=glcB PE=3 SV=1	1	1	1	1	1.2	1.2	1.2	78.659	725	725	0	7.2368	0	1				103	567	TRUE	609	1066	2142	2142
sp|Q9I685|SAHH_PSEAE	sp|Q9I685|SAHH_PSEAE	9	9	9	>sp|Q9I685|SAHH_PSEAE Adenosylhomocysteinase OS=Pseudomonas aeruginosa (strain ATCC 15692 / PAO1 / 1C / PRS 101 / LMG 12228) GN=ahcY PE=3 SV=1	1	9	9	9	25.4	25.4	25.4	51.399	469	469	0	67.558	32254000	32				104	148;196;263;282;399;458;556;608;640	True;True;True;True;True;True;True;True;True	164;217;287;307;308;426;495;597;653;686	276;356;357;468;469;502;503;504;505;720;721;867;1046;1047;1139;1140;1193;1194	589;590;705;706;707;906;907;908;962;963;964;965;966;967;968;969;970;971;972;1385;1386;1387;1388;1677;1678;2073;2074;2274;2275;2276;2366;2367	590;705;906;967;1388;1678;2074;2274;2366	38	387
sp|Q9I6M4|DAVT_PSEAE	sp|Q9I6M4|DAVT_PSEAE	6	6	6	>sp|Q9I6M4|DAVT_PSEAE 5-aminovalerate aminotransferase DavT OS=Pseudomonas aeruginosa (strain ATCC 15692 / PAO1 / 1C / PRS 101 / LMG 12228) GN=davT PE=1 SV=1	1	6	6	6	17.8	17.8	17.8	45.22	426	426	0	49.892	16883000	10				105	29;311;515;530;537;582	True;True;True;True;True;True	33;337;555;570;577;626	56;57;566;975;976;1005;1006;1015;1091;1092	136;137;138;1105;1907;1908;2011;2012;2013;2022;2190;2191	137;1105;1908;2011;2022;2190
sp|Q9I6M5|DAVD_PSEAE	sp|Q9I6M5|DAVD_PSEAE	3	3	3	>sp|Q9I6M5|DAVD_PSEAE Glutarate-semialdehyde dehydrogenase DavD OS=Pseudomonas aeruginosa (strain ATCC 15692 / PAO1 / 1C / PRS 101 / LMG 12228) GN=davD PE=1 SV=1	1	3	3	3	12.4	12.4	12.4	51.622	483	483	0	36.725	15609000	8				106	372;605;628	True;True;True	399;649;674	673;674;1129;1130;1176	1300;1301;1302;1303;2256;2257;2258;2345	1301;2256;2345
sp|Q9I747|HCP1_PSEAE	sp|Q9I747|HCP1_PSEAE	2	2	2	>sp|Q9I747|HCP1_PSEAE Protein hcp1 OS=Pseudomonas aeruginosa (strain ATCC 15692 / PAO1 / 1C / PRS 101 / LMG 12228) GN=hcp1 PE=1 SV=1	1	2	2	2	16.7	16.7	16.7	17.414	162	162	0	18.115	7128000	3				107	161;607	True;True	179;652	297;1137;1138	618;2272;2273	618;2272
sp|Q9I7C4|DPO3B_PSEAE	sp|Q9I7C4|DPO3B_PSEAE	2	2	2	>sp|Q9I7C4|DPO3B_PSEAE DNA polymerase III subunit beta OS=Pseudomonas aeruginosa (strain ATCC 15692 / PAO1 / 1C / PRS 101 / LMG 12228) GN=dnaN PE=3 SV=1	1	2	2	2	6.8	6.8	6.8	40.694	367	367	0	13.929	966510	4				108	129;382	True;True	143;409	245;246;689	544;545;546;1322	546;1322
sp|Q9S508|PHZB2_PSEAE;sp|O69753|PHZB1_PSEAE	sp|Q9S508|PHZB2_PSEAE;sp|O69753|PHZB1_PSEAE	5;3	5;3	5;3	>sp|Q9S508|PHZB2_PSEAE Phenazine biosynthesis protein PhzB 2 OS=Pseudomonas aeruginosa (strain ATCC 15692 / PAO1 / 1C / PRS 101 / LMG 12228) GN=phzB2 PE=1 SV=1;>sp|O69753|PHZB1_PSEAE Phenazine biosynthesis protein PhzB 1 OS=Pseudomonas aeruginosa (strain A	2	5	5	5	44.4	44.4	44.4	19.027	162	162;162	0	39.877	26189000	15				109	55;135;276;313;412	True;True;True;True;True	61;149;150;301;339;441;442	101;102;255;256;257;258;493;568;745;746	261;262;263;264;265;556;557;558;559;945;946;1115;1432;1433;1434	262;559;945;1115;1432	39;40	1;139
sp|Q9X2T1|THIO_PSEAE	sp|Q9X2T1|THIO_PSEAE	1	1	1	>sp|Q9X2T1|THIO_PSEAE Thioredoxin OS=Pseudomonas aeruginosa (strain ATCC 15692 / PAO1 / 1C / PRS 101 / LMG 12228) GN=trxA PE=3 SV=1	1	1	1	1	11.1	11.1	11.1	11.87	108	108	0	6.5076	1307300	2				110	371	TRUE	398	671;672	1298;1299	1298
tr|Q9HTD1|Q9HTD1_PSEAE	tr|Q9HTD1|Q9HTD1_PSEAE	23	23	23	>tr|Q9HTD1|Q9HTD1_PSEAE Probable transcarboxylase subunit OS=Pseudomonas aeruginosa (strain ATCC 15692 / PAO1 / 1C / PRS 101 / LMG 12228) GN=PA5435 PE=4 SV=1	1	23	23	23	50.6	50.6	50.6	66.095	607	607	0	202.63	237950000	119				111	7;10;57;65;115;126;175;193;215;221;222;246;253;411;457;485;486;531;616;617;649;650;652	True;True;True;True;True;True;True;True;True;True;True;True;True;True;True;True;True;True;True;True;True;True;True	7;10;63;64;74;127;128;140;195;214;237;243;244;245;269;276;277;439;440;494;522;523;524;571;661;662;663;695;696;698	12;13;17;18;19;20;105;106;107;124;125;219;220;221;222;238;239;240;241;323;324;353;390;391;399;400;401;402;440;450;451;452;453;741;742;743;744;865;866;919;920;921;922;923;924;1007;1008;1154;1155;1156;1157;1158;1159;1220;1221;1222;1223;1225;1226	34;35;36;37;41;42;43;44;45;46;47;48;49;50;51;52;53;268;269;270;271;272;309;310;487;488;489;490;491;492;493;494;495;529;530;531;532;533;534;535;536;537;538;539;661;662;702;768;769;781;782;783;784;785;786;787;788;789;790;791;792;793;794;795;796;864;885;886;887;888;1422;1423;1424;1425;1426;1427;1428;1429;1430;1431;1674;1675;1676;1758;1759;1760;1761;1762;1763;1764;1765;1766;1767;1768;1769;1770;2014;2…	34;42;272;310;487;533;661;702;768;781;793;864;885;1430;1674;1762;1767;2014;2309;2319;2442;2447;2451	41;42;43;44;45;46;47	125;172;182;274;306;323;435
tr|Q9HTD9|Q9HTD9_PSEAE	tr|Q9HTD9|Q9HTD9_PSEAE	3	3	3	>tr|Q9HTD9|Q9HTD9_PSEAE Alcohol dehydrogenase OS=Pseudomonas aeruginosa (strain ATCC 15692 / PAO1 / 1C / PRS 101 / LMG 12228) GN=adhA PE=1 SV=1	1	3	3	3	11.4	11.4	11.4	35.911	342	342	0	17.979	6108400	6				112	8;250;460	True;True;True	8;273;497	14;446;447;870;871	38;880;881;882;1682;1683	38;881;1683
tr|Q9HTP2|Q9HTP2_PSEAE	tr|Q9HTP2|Q9HTP2_PSEAE	7	7	7	>tr|Q9HTP2|Q9HTP2_PSEAE Probable aldehyde dehydrogenase OS=Pseudomonas aeruginosa (strain ATCC 15692 / PAO1 / 1C / PRS 101 / LMG 12228) GN=PA5312 PE=3 SV=1	1	7	7	7	22.5	22.5	22.5	53.143	497	497	0	51.926	20911000	12				113	132;177;241;242;303;348;508	True;True;True;True;True;True;True	146;197;264;265;329;374;547	251;326;431;432;433;434;551;552;634;957;958	552;664;850;851;852;853;854;1084;1085;1231;1841;1842;1843	552;664;851;854;1085;1231;1843
tr|Q9HUC4|Q9HUC4_PSEAE	tr|Q9HUC4|Q9HUC4_PSEAE	1	1	1	>tr|Q9HUC4|Q9HUC4_PSEAE Probable transcriptional regulator OS=Pseudomonas aeruginosa (strain ATCC 15692 / PAO1 / 1C / PRS 101 / LMG 12228) GN=PA5059 PE=4 SV=1	1	1	1	1	4.4	4.4	4.4	23.439	205	205	0.0060606	5.6524	0	1				114	479	TRUE	516	909	1741	1741
tr|Q9HUD3|Q9HUD3_PSEAE	tr|Q9HUD3|Q9HUD3_PSEAE	3	3	3	>tr|Q9HUD3|Q9HUD3_PSEAE Malic enzyme OS=Pseudomonas aeruginosa (strain ATCC 15692 / PAO1 / 1C / PRS 101 / LMG 12228) GN=PA5046 PE=4 SV=1	1	3	3	3	10.2	10.2	10.2	45.428	422	422	0	28.56	5031400	7				115	4;353;484	True;True;True	4;379;521	6;7;642;918	7;8;9;10;1255;1756;1757	10;1255;1756
tr|Q9HV54|Q9HV54_PSEAE	tr|Q9HV54|Q9HV54_PSEAE	2	2	2	>tr|Q9HV54|Q9HV54_PSEAE Transcription termination/antitermination protein NusA OS=Pseudomonas aeruginosa (strain ATCC 15692 / PAO1 / 1C / PRS 101 / LMG 12228) GN=nusA PE=3 SV=1	1	2	2	2	7.7	7.7	7.7	54.658	493	493	0	21.189	546470	3				116	226;251	True;True	249;274	407;408;448	802;803;883	802;883
tr|Q9HV96|Q9HV96_PSEAE	tr|Q9HV96|Q9HV96_PSEAE	1	1	1	>tr|Q9HV96|Q9HV96_PSEAE Uncharacterized protein OS=Pseudomonas aeruginosa (strain ATCC 15692 / PAO1 / 1C / PRS 101 / LMG 12228) GN=PA4701 PE=4 SV=1	1	1	1	1	2.5	2.5	2.5	58.376	520	520	0.0063291	5.7862	594730	1				117	255	TRUE	279	456;457	892;893	893
tr|Q9HVJ1|Q9HVJ1_PSEAE	tr|Q9HVJ1|Q9HVJ1_PSEAE	4	4	4	>tr|Q9HVJ1|Q9HVJ1_PSEAE Probable ATP-binding component of ABC transporter OS=Pseudomonas aeruginosa (strain ATCC 15692 / PAO1 / 1C / PRS 101 / LMG 12228) GN=PA4595 PE=4 SV=1	1	4	4	4	8.1	8.1	8.1	61.32	554	554	0	28.788	6751100	6				118	259;262;489;596	True;True;True;True	283;286;527;640	462;466;467;928;1113;1114	899;904;905;1777;2228;2229	899;905;1777;2229
tr|Q9HVY4|Q9HVY4_PSEAE	tr|Q9HVY4|Q9HVY4_PSEAE	1	1	1	>tr|Q9HVY4|Q9HVY4_PSEAE Ubiquinol-cytochrome c reductase iron-sulfur subunit OS=Pseudomonas aeruginosa (strain ATCC 15692 / PAO1 / 1C / PRS 101 / LMG 12228) GN=PA4431 PE=4 SV=1	1	1	1	1	6.1	6.1	6.1	20.828	197	197	0.0060976	5.6542	363560	1				119	2	TRUE	2	3	3	3
tr|Q9HVY6|Q9HVY6_PSEAE	tr|Q9HVY6|Q9HVY6_PSEAE	2	2	2	>tr|Q9HVY6|Q9HVY6_PSEAE Probable cytochrome c1 OS=Pseudomonas aeruginosa (strain ATCC 15692 / PAO1 / 1C / PRS 101 / LMG 12228) GN=PA4429 PE=4 SV=1	1	2	2	2	9.6	9.6	9.6	28.993	260	260	0	15.945	6027100	5				120	218;553	True;True	240;594	395;1041;1042	775;2065;2066;2067;2068	775;2065
tr|Q9HW32|Q9HW32_PSEAE	tr|Q9HW32|Q9HW32_PSEAE	1	1	1	>tr|Q9HW32|Q9HW32_PSEAE Insulin-cleaving metalloproteinase outer membrane protein OS=Pseudomonas aeruginosa (strain ATCC 15692 / PAO1 / 1C / PRS 101 / LMG 12228) GN=icmP PE=4 SV=1	1	1	1	1	5.2	5.2	5.2	47.23	446	446	0	12.553	670720	4				121	12	TRUE	13	23;24	56;57;58;59	56
tr|Q9HW49|Q9HW49_PSEAE	tr|Q9HW49|Q9HW49_PSEAE	6	6	6	>tr|Q9HW49|Q9HW49_PSEAE Uncharacterized protein OS=Pseudomonas aeruginosa (strain ATCC 15692 / PAO1 / 1C / PRS 101 / LMG 12228) GN=PA4352 PE=3 SV=1	1	6	6	6	37.4	37.4	37.4	30.972	286	286	0	52.848	18640000	25				122	85;318;568;575;576;597	True;True;True;True;True;True	94;95;344;610;618;619;620;641	160;161;162;576;577;1067;1076;1077;1078;1079;1080;1115	365;366;367;368;369;370;371;372;373;374;375;1126;1127;1128;2143;2154;2155;2156;2157;2158;2159;2160;2161;2162;2230	374;1128;2143;2157;2162;2230	48;49	100;158
tr|Q9HW72|Q9HW72_PSEAE	tr|Q9HW72|Q9HW72_PSEAE	1	1	1	>tr|Q9HW72|Q9HW72_PSEAE Pyruvate kinase OS=Pseudomonas aeruginosa (strain ATCC 15692 / PAO1 / 1C / PRS 101 / LMG 12228) GN=pykA PE=3 SV=1	1	1	1	1	5.6	5.6	5.6	52.252	483	483	0	6.0901	557140	1				123	298	TRUE	324	543	1073	1073
tr|Q9HWG9|Q9HWG9_PSEAE	tr|Q9HWG9|Q9HWG9_PSEAE	5	5	5	>tr|Q9HWG9|Q9HWG9_PSEAE Flavin-containing monooxygenase OS=Pseudomonas aeruginosa (strain ATCC 15692 / PAO1 / 1C / PRS 101 / LMG 12228) GN=phzS PE=1 SV=1	1	5	5	5	21.1	21.1	21.1	43.644	402	402	0	35.853	5423800	9				124	194;224;294;393;653	True;True;True;True;True	215;247;320;420;699	354;405;537;710;711;1227;1228	703;799;1064;1363;1364;1365;2454;2455;2456	703;799;1064;1365;2456	50;51;52	111;315;318
tr|Q9HWN0|Q9HWN0_PSEAE	tr|Q9HWN0|Q9HWN0_PSEAE	1	1	1	>tr|Q9HWN0|Q9HWN0_PSEAE Acetoin catabolism protein AcoB OS=Pseudomonas aeruginosa (strain ATCC 15692 / PAO1 / 1C / PRS 101 / LMG 12228) GN=acoB PE=4 SV=1	1	1	1	1	6.2	6.2	6.2	36.437	339	339	0	5.8197	749220	0				125	592	TRUE	636	1109	2222	2222
tr|Q9HWQ0|Q9HWQ0_PSEAE	tr|Q9HWQ0|Q9HWQ0_PSEAE	3	3	3	>tr|Q9HWQ0|Q9HWQ0_PSEAE Probable iron-sulfur protein OS=Pseudomonas aeruginosa (strain ATCC 15692 / PAO1 / 1C / PRS 101 / LMG 12228) GN=PA4131 PE=4 SV=1	1	3	3	3	7.2	7.2	7.2	63.991	573	573	0	24.72	4112200	4				126	27;155;287	True;True;True	31;173;313	53;290;525;526	133;611;1050;1051	133;611;1051
tr|Q9HWV0|Q9HWV0_PSEAE	tr|Q9HWV0|Q9HWV0_PSEAE	5	5	5	>tr|Q9HWV0|Q9HWV0_PSEAE Probable nonribosomal peptide synthetase OS=Pseudomonas aeruginosa (strain ATCC 15692 / PAO1 / 1C / PRS 101 / LMG 12228) GN=PA4078 PE=4 SV=1	1	5	5	5	7.4	7.4	7.4	110.35	991	991	0	35.382	9614000	9				127	88;180;375;495;569	True;True;True;True;True	98;201;402;533;611	165;332;333;679;937;938;1068	378;674;675;1311;1312;1788;1789;1790;2144	378;674;1312;1789;2144
tr|Q9I2C4|Q9I2C4_PSEAE;tr|Q9HX05|Q9HX05_PSEAE	tr|Q9I2C4|Q9I2C4_PSEAE;tr|Q9HX05|Q9HX05_PSEAE	4;4	4;4	4;4	>tr|Q9I2C4|Q9I2C4_PSEAE NAD+ dependent aldehyde dehydrogenase ExaC OS=Pseudomonas aeruginosa (strain ATCC 15692 / PAO1 / 1C / PRS 101 / LMG 12228) GN=exaC PE=3 SV=1;>tr|Q9HX05|Q9HX05_PSEAE Probable aldehyde dehydrogenase OS=Pseudomonas aeruginosa (strain A	2	4	4	4	13	13	13	54.892	506	506;506	0	50.768	12426000	8				128	216;239;329;651	True;True;True;True	238;262;355;697	392;428;429;597;598;1224	770;846;847;848;1151;1152;1153;2448	770;847;1151;2448
tr|Q9HXJ2|Q9HXJ2_PSEAE	tr|Q9HXJ2|Q9HXJ2_PSEAE	1	1	1	>tr|Q9HXJ2|Q9HXJ2_PSEAE Type 4 fimbrial biogenesis protein PilF OS=Pseudomonas aeruginosa (strain ATCC 15692 / PAO1 / 1C / PRS 101 / LMG 12228) GN=pilF PE=1 SV=1	1	1	1	1	4.4	4.4	4.4	28.537	252	252	0.0061728	5.6788	161030	1				129	118	TRUE	132	227	503	503
tr|Q9HXU8|Q9HXU8_PSEAE	tr|Q9HXU8|Q9HXU8_PSEAE	1	1	1	>tr|Q9HXU8|Q9HXU8_PSEAE Lipotoxon F, LptF OS=Pseudomonas aeruginosa (strain ATCC 15692 / PAO1 / 1C / PRS 101 / LMG 12228) GN=lptF PE=3 SV=1	1	1	1	1	5	5	5	28.514	261	261	0	21.604	718080	2				130	426	TRUE	461	780;781	1508;1509	1508
tr|Q9HY13|Q9HY13_PSEAE	tr|Q9HY13|Q9HY13_PSEAE	3	3	3	>tr|Q9HY13|Q9HY13_PSEAE Uncharacterized protein OS=Pseudomonas aeruginosa (strain ATCC 15692 / PAO1 / 1C / PRS 101 / LMG 12228) GN=PA3613 PE=4 SV=1	1	3	3	3	7	7	7	88.378	801	801	0	18.626	3710800	3				131	520;523;593	True;True;True	560;563;637	987;991;992;1110	1954;1960;1961;2223	1954;1960;2223
tr|Q9HY77|Q9HY77_PSEAE	tr|Q9HY77|Q9HY77_PSEAE	1	1	1	>tr|Q9HY77|Q9HY77_PSEAE Glutaredoxin OS=Pseudomonas aeruginosa (strain ATCC 15692 / PAO1 / 1C / PRS 101 / LMG 12228) GN=PA3533 PE=3 SV=1	1	1	1	1	7.4	7.4	7.4	11.843	108	108	0.0057803	5.5282	0	1				132	195	TRUE	216	355	704	704
tr|Q9HY79|Q9HY79_PSEAE	tr|Q9HY79|Q9HY79_PSEAE	2	2	2	>tr|Q9HY79|Q9HY79_PSEAE Ferroxidase OS=Pseudomonas aeruginosa (strain ATCC 15692 / PAO1 / 1C / PRS 101 / LMG 12228) GN=bfrB PE=1 SV=1	1	2	2	2	20.3	20.3	20.3	18.553	158	158	0	16.479	9651900	8				133	275;278	True;True	300;303	491;492;495;496	941;942;943;944;948;949;950;951	944;948
tr|Q9HY81|Q9HY81_PSEAE	tr|Q9HY81|Q9HY81_PSEAE	8	8	8	>tr|Q9HY81|Q9HY81_PSEAE Probable peroxidase OS=Pseudomonas aeruginosa (strain ATCC 15692 / PAO1 / 1C / PRS 101 / LMG 12228) GN=PA3529 PE=1 SV=1	1	8	8	8	42.5	42.5	42.5	21.822	200	200	0	62.152	80366000	35				134	90;212;288;441;450;509;656;662	True;True;True;True;True;True;True;True	100;233;314;476;487;548;702;708	168;169;170;383;527;528;834;835;854;855;959;960;1232;1233;1242;1243	386;387;388;389;390;391;392;393;394;395;396;397;398;399;752;1052;1053;1621;1622;1653;1654;1655;1844;1845;1846;1847;1848;1849;1850;2464;2465;2466;2467;2481;2482	394;752;1053;1622;1654;1845;2464;2481
tr|Q9HYT5|Q9HYT5_PSEAE	tr|Q9HYT5|Q9HYT5_PSEAE	5	5	5	>tr|Q9HYT5|Q9HYT5_PSEAE Uncharacterized protein OS=Pseudomonas aeruginosa (strain ATCC 15692 / PAO1 / 1C / PRS 101 / LMG 12228) GN=PA3309 PE=3 SV=1	1	5	5	5	41.7	41.7	41.7	16.496	151	151	0	48.094	71121000	26				135	236;281;366;566;585	True;True;True;True;True	259;306;392;393;608;629	423;424;500;501;661;662;663;664;1065;1097;1098	838;839;840;841;955;956;957;958;959;960;961;1282;1283;1284;1285;1286;1287;1288;1289;1290;2140;2141;2198;2199;2200;2201	840;958;1284;2141;2199	53	129
tr|Q9HYZ6|Q9HYZ6_PSEAE	tr|Q9HYZ6|Q9HYZ6_PSEAE	2	2	2	>tr|Q9HYZ6|Q9HYZ6_PSEAE Site-determining protein OS=Pseudomonas aeruginosa (strain ATCC 15692 / PAO1 / 1C / PRS 101 / LMG 12228) GN=minD PE=3 SV=1	1	2	2	2	10	10	10	29.635	271	271	0	10.832	1655300	1				136	361;548	True;True	387;589	653;1033	1268;2056	1268;2056
tr|Q9HZK4|Q9HZK4_PSEAE	tr|Q9HZK4|Q9HZK4_PSEAE	5	5	5	>tr|Q9HZK4|Q9HZK4_PSEAE Glyceraldehyde-3-phosphate dehydrogenase OS=Pseudomonas aeruginosa (strain ATCC 15692 / PAO1 / 1C / PRS 101 / LMG 12228) GN=PA3001 PE=3 SV=1	1	5	5	5	14.3	14.3	14.3	50.111	461	461	0	42.598	10309000	8				137	133;138;335;482;611	True;True;True;True;True	147;153;361;519;656	252;253;262;608;916;1145;1146	553;554;568;1171;1754;2285;2286;2287	553;568;1171;1754;2286
tr|Q9I028|Q9I028_PSEAE	tr|Q9I028|Q9I028_PSEAE	5	5	5	>tr|Q9I028|Q9I028_PSEAE Probable acyl-CoA dehydrogenase OS=Pseudomonas aeruginosa (strain ATCC 15692 / PAO1 / 1C / PRS 101 / LMG 12228) GN=PA2815 PE=4 SV=1	1	5	5	5	13.1	13.1	13.1	88.762	815	815	0	40.582	20860000	13				138	157;280;338;614;654	True;True;True;True;True	175;305;364;659;700	292;293;498;499;612;613;1150;1151;1229;1230	613;614;953;954;1177;1178;2301;2302;2303;2457;2458;2459;2460;2461;2462	613;954;1177;2303;2458
tr|Q9I056|Q9I056_PSEAE	tr|Q9I056|Q9I056_PSEAE	1	1	1	>tr|Q9I056|Q9I056_PSEAE Carboxypeptidase G2 OS=Pseudomonas aeruginosa (strain ATCC 15692 / PAO1 / 1C / PRS 101 / LMG 12228) GN=cpg2 PE=4 SV=1	1	1	1	1	3.4	3.4	3.4	44.007	412	412	0.0056497	5.4917	984820	3				139	404	TRUE	431	729;730	1403;1404;1405	1403
tr|Q9I0L4|Q9I0L4_PSEAE	tr|Q9I0L4|Q9I0L4_PSEAE	2	2	2	>tr|Q9I0L4|Q9I0L4_PSEAE Isocitrate dehydrogenase OS=Pseudomonas aeruginosa (strain ATCC 15692 / PAO1 / 1C / PRS 101 / LMG 12228) GN=idh PE=4 SV=1	1	2	2	2	3.8	3.8	3.8	81.633	741	741	0	13.999	1239200	3				140	125;279	True;True	139;304	237;497	527;528;952	527;952
tr|Q9I0L5|Q9I0L5_PSEAE	tr|Q9I0L5|Q9I0L5_PSEAE	11	11	11	>tr|Q9I0L5|Q9I0L5_PSEAE Isocitrate dehydrogenase [NADP] OS=Pseudomonas aeruginosa (strain ATCC 15692 / PAO1 / 1C / PRS 101 / LMG 12228) GN=icd PE=3 SV=1	1	11	11	11	33	33	33	45.577	418	418	0	96.568	63936000	47				141	54;77;124;185;213;237;296;444;551;606;636	True;True;True;True;True;True;True;True;True;True;True	60;86;138;206;234;260;322;480;481;592;650;651;682	99;100;147;148;236;338;339;384;385;425;426;540;541;841;842;843;844;1038;1131;1132;1133;1134;1135;1136;1188;1189	257;258;259;260;350;351;352;526;681;682;683;753;754;755;756;757;842;843;844;1070;1071;1630;1631;1632;1633;1634;1635;1636;1637;2061;2062;2259;2260;2261;2262;2263;2264;2265;2266;2267;2268;2269;2270;2271;2360;2361;2362	257;351;526;681;756;842;1070;1634;2061;2269;2361	54;55;56;57	21;47;364;365
tr|Q9I0T1|Q9I0T1_PSEAE	tr|Q9I0T1|Q9I0T1_PSEAE	3	3	3	>tr|Q9I0T1|Q9I0T1_PSEAE Probable acyl-CoA thiolase OS=Pseudomonas aeruginosa (strain ATCC 15692 / PAO1 / 1C / PRS 101 / LMG 12228) GN=PA2553 PE=3 SV=1	1	3	3	3	10.1	10.1	10.1	41.4	396	396	0	22.377	12534000	4				142	123;130;182	True;True;True	137;144;203	234;235;247;248;335	524;525;547;548;678	525;548;678
tr|Q9I148|Q9I148_PSEAE	tr|Q9I148|Q9I148_PSEAE	1	1	1	>tr|Q9I148|Q9I148_PSEAE Uncharacterized protein OS=Pseudomonas aeruginosa (strain ATCC 15692 / PAO1 / 1C / PRS 101 / LMG 12228) GN=PA2434 PE=4 SV=1	1	1	1	1	4.4	4.4	4.4	19.411	181	181	0.0055866	5.4542	0	1				143	420	TRUE	451	759	1456	1456
tr|Q9I1E7|Q9I1E7_PSEAE	tr|Q9I1E7|Q9I1E7_PSEAE	4	4	4	>tr|Q9I1E7|Q9I1E7_PSEAE Alkyl hydroperoxide reductase AhpD OS=Pseudomonas aeruginosa (strain ATCC 15692 / PAO1 / 1C / PRS 101 / LMG 12228) GN=PA2331 PE=3 SV=1	1	4	4	4	22.6	22.6	22.6	19.904	186	186	0	29.962	10218000	8				144	190;376;540;644	True;True;True;True	211;403;581;690	348;680;681;1021;1212;1213	695;1313;1314;2034;2035;2432;2433;2434	695;1313;2034;2433
tr|Q9I1E8|Q9I1E8_PSEAE	tr|Q9I1E8|Q9I1E8_PSEAE	3	3	3	>tr|Q9I1E8|Q9I1E8_PSEAE Uncharacterized protein OS=Pseudomonas aeruginosa (strain ATCC 15692 / PAO1 / 1C / PRS 101 / LMG 12228) GN=PA2330 PE=4 SV=1	1	3	3	3	14.1	14.1	14.1	37.68	355	355	0	28.042	2877900	4				145	19;257;344	True;True;True	21;281;370	39;459;625;626	89;895;1213;1214	89;895;1214
tr|Q9I1H3|Q9I1H3_PSEAE	tr|Q9I1H3|Q9I1H3_PSEAE	2	2	2	>tr|Q9I1H3|Q9I1H3_PSEAE AmbE OS=Pseudomonas aeruginosa (strain ATCC 15692 / PAO1 / 1C / PRS 101 / LMG 12228) GN=ambE PE=4 SV=1	1	2	2	2	1.5	1.5	1.5	229.04	2124	2124	0	16.957	1037600	2				146	0;570	True;True	0;612	0;1069	0;2145	0;2145
tr|Q9I1H5|Q9I1H5_PSEAE	tr|Q9I1H5|Q9I1H5_PSEAE	8	8	8	>tr|Q9I1H5|Q9I1H5_PSEAE Chitinase OS=Pseudomonas aeruginosa (strain ATCC 15692 / PAO1 / 1C / PRS 101 / LMG 12228) GN=chiC PE=3 SV=1	1	8	8	8	23.2	23.2	23.2	53.042	483	483	0	62.8	47684000	24				147	205;234;245;319;320;454;564;642	True;True;True;True;True;True;True;True	226;257;268;345;346;491;606;688	371;372;421;438;439;578;579;580;581;582;860;861;1061;1062;1197;1198	731;732;836;861;862;863;1129;1130;1131;1132;1133;1134;1135;1662;1663;1664;1665;2126;2127;2128;2372;2373;2374;2375	731;836;862;1133;1134;1665;2126;2372
tr|Q9I1Z4|Q9I1Z4_PSEAE	tr|Q9I1Z4|Q9I1Z4_PSEAE	1	1	1	>tr|Q9I1Z4|Q9I1Z4_PSEAE Probable transcriptional regulator OS=Pseudomonas aeruginosa (strain ATCC 15692 / PAO1 / 1C / PRS 101 / LMG 12228) GN=PA2121 PE=4 SV=1	1	1	1	1	9.3	9.3	9.3	33.521	301	301	0.0060241	5.6316	0	8				148	474	TRUE	511	894;895;896;897;898;899;900;901	1718;1719;1720;1721;1722;1723;1724;1725	1721
tr|Q9I246|Q9I246_PSEAE	tr|Q9I246|Q9I246_PSEAE	10	10	10	>tr|Q9I246|Q9I246_PSEAE Probable carbamoyl transferase OS=Pseudomonas aeruginosa (strain ATCC 15692 / PAO1 / 1C / PRS 101 / LMG 12228) GN=PA2069 PE=4 SV=1	1	10	10	10	23.2	23.2	23.2	63.382	574	574	0	78.104	29132000	24				149	100;159;235;238;244;292;453;481;494;499	True;True;True;True;True;True;True;True;True;True	110;177;258;261;267;318;490;518;532;537	183;184;295;422;427;437;534;535;858;859;912;913;914;915;935;936;943;944	419;420;616;837;845;860;1059;1060;1061;1062;1658;1659;1660;1661;1747;1748;1749;1750;1751;1752;1753;1786;1787;1797;1798;1799	420;616;837;845;860;1059;1658;1753;1787;1798
tr|Q9I299|Q9I299_PSEAE	tr|Q9I299|Q9I299_PSEAE	5	5	5	>tr|Q9I299|Q9I299_PSEAE Methylcrotonyl-CoA carboxylase, alpha-subunit (Biotin-containing) OS=Pseudomonas aeruginosa (strain ATCC 15692 / PAO1 / 1C / PRS 101 / LMG 12228) GN=liuD PE=1 SV=1	1	5	5	5	9	9	9	71.282	655	655	0	30.834	6387700	6				150	45;277;327;625;626	True;True;True;True;True	51;302;353;671;672	85;494;594;595;1172;1173	228;229;947;1148;1149;2336;2337	229;947;1149;2336;2337
tr|Q9I2A2|Q9I2A2_PSEAE	tr|Q9I2A2|Q9I2A2_PSEAE	1	1	1	>tr|Q9I2A2|Q9I2A2_PSEAE Fumarylacetoacetase OS=Pseudomonas aeruginosa (strain ATCC 15692 / PAO1 / 1C / PRS 101 / LMG 12228) GN=fahA PE=4 SV=1	1	1	1	1	4.9	4.9	4.9	46.341	432	432	0	6.6648	2051600	3				151	491	TRUE	529	931;932	1781;1782;1783	1781
tr|Q9I2A6|Q9I2A6_PSEAE	tr|Q9I2A6|Q9I2A6_PSEAE	1	1	1	>tr|Q9I2A6|Q9I2A6_PSEAE 3-hydroxybutyrate dehydrogenase OS=Pseudomonas aeruginosa (strain ATCC 15692 / PAO1 / 1C / PRS 101 / LMG 12228) GN=bdhA PE=3 SV=1	1	1	1	1	6.2	6.2	6.2	26.727	256	256	0	5.9565	3750700	4				152	300	TRUE	326	546;547	1076;1077;1078;1079	1078
tr|Q9I2H1|Q9I2H1_PSEAE	tr|Q9I2H1|Q9I2H1_PSEAE	1	1	1	>tr|Q9I2H1|Q9I2H1_PSEAE Probable hydroxylase large subunit OS=Pseudomonas aeruginosa (strain ATCC 15692 / PAO1 / 1C / PRS 101 / LMG 12228) GN=PA1933 PE=4 SV=1	1	1	1	1	1.4	1.4	1.4	79.115	734	734	0	6.3206	922150	1				153	183	TRUE	204	336	679	679
tr|Q9I2R2|Q9I2R2_PSEAE	tr|Q9I2R2|Q9I2R2_PSEAE	2	2	2	>tr|Q9I2R2|Q9I2R2_PSEAE Probable oxidoreductase OS=Pseudomonas aeruginosa (strain ATCC 15692 / PAO1 / 1C / PRS 101 / LMG 12228) GN=PA1833 PE=4 SV=1	1	2	2	2	10.6	10.6	10.6	34.551	330	330	0	16.892	1044100	3				154	140;225	True;True	155;248	264;406	570;800;801	570;800
tr|Q9I2V3|Q9I2V3_PSEAE	tr|Q9I2V3|Q9I2V3_PSEAE	2	2	2	>tr|Q9I2V3|Q9I2V3_PSEAE Uncharacterized protein OS=Pseudomonas aeruginosa (strain ATCC 15692 / PAO1 / 1C / PRS 101 / LMG 12228) GN=PA1789 PE=1 SV=1	1	2	2	2	11.5	11.5	11.5	31.273	287	287	0	12.194	2377700	3				155	272;498	True;True	297;536	487;942	937;1795;1796	937;1796
tr|Q9I2W9|Q9I2W9_PSEAE	tr|Q9I2W9|Q9I2W9_PSEAE	6	6	6	>tr|Q9I2W9|Q9I2W9_PSEAE Phosphoenolpyruvate synthase OS=Pseudomonas aeruginosa (strain ATCC 15692 / PAO1 / 1C / PRS 101 / LMG 12228) GN=ppsA PE=3 SV=1	1	6	6	6	9.9	9.9	9.9	85.816	791	791	0	53.472	10976000	10				156	17;50;166;328;505;535	True;True;True;True;True;True	19;56;185;354;543;575	35;36;92;308;596;952;1013	81;82;83;240;241;642;643;1150;1812;2020	83;240;643;1150;1812;2020
tr|Q9I393|Q9I393_PSEAE	tr|Q9I393|Q9I393_PSEAE	1	1	1	>tr|Q9I393|Q9I393_PSEAE Probable enoyl-CoA hydratase/isomerase OS=Pseudomonas aeruginosa (strain ATCC 15692 / PAO1 / 1C / PRS 101 / LMG 12228) GN=PA1629 PE=3 SV=1	1	1	1	1	3.4	3.4	3.4	27.893	261	261	0.0059172	5.6035	1269600	1				157	414	TRUE	444	748	1436	1436
tr|Q9I3D3|Q9I3D3_PSEAE	tr|Q9I3D3|Q9I3D3_PSEAE	9	9	9	>tr|Q9I3D3|Q9I3D3_PSEAE 2-oxoglutarate dehydrogenase (E1 subunit) OS=Pseudomonas aeruginosa (strain ATCC 15692 / PAO1 / 1C / PRS 101 / LMG 12228) GN=sucA PE=4 SV=1	1	9	9	9	12.8	12.8	12.8	105.88	943	943	0	59.533	16420000	15				158	93;98;103;210;373;374;407;413;634	True;True;True;True;True;True;True;True;True	103;108;113;231;400;401;434;443;680	173;181;189;381;675;676;677;678;734;747;1185;1186	402;414;415;416;417;430;750;1304;1305;1306;1307;1308;1309;1310;1412;1435;2357;2358	402;415;430;750;1305;1306;1412;1435;2358
tr|Q9I3D4|Q9I3D4_PSEAE	tr|Q9I3D4|Q9I3D4_PSEAE	4	4	4	>tr|Q9I3D4|Q9I3D4_PSEAE Succinate dehydrogenase (B subunit) OS=Pseudomonas aeruginosa (strain ATCC 15692 / PAO1 / 1C / PRS 101 / LMG 12228) GN=sdhB PE=4 SV=1	1	4	4	4	22.6	22.6	22.6	26.155	235	235	0	32.678	14732000	9				159	174;325;397;588	True;True;True;True	194;351;424;632	321;322;590;591;717;718;1101	658;659;660;1143;1144;1145;1382;1383;2205	659;1144;1382;2205
tr|Q9I3D5|Q9I3D5_PSEAE	tr|Q9I3D5|Q9I3D5_PSEAE	6	6	6	>tr|Q9I3D5|Q9I3D5_PSEAE Succinate dehydrogenase flavoprotein subunit OS=Pseudomonas aeruginosa (strain ATCC 15692 / PAO1 / 1C / PRS 101 / LMG 12228) GN=sdhA PE=3 SV=1	1	6	6	6	14.2	14.2	14.2	63.531	590	590	0	80.457	31974000	31				160	203;248;249;302;345;434	True;True;True;True;True;True	224;271;272;328;371;469	367;368;442;443;444;445;550;627;628;629;630;823	723;724;725;866;867;868;869;870;871;872;873;874;875;876;877;878;879;1082;1083;1215;1216;1217;1218;1219;1220;1221;1222;1223;1224;1600;1601	724;867;870;1082;1217;1600
tr|Q9I3G0|Q9I3G0_PSEAE	tr|Q9I3G0|Q9I3G0_PSEAE	1	1	1	>tr|Q9I3G0|Q9I3G0_PSEAE Cytochrome c oxidase, cbb3-type, CcoN subunit OS=Pseudomonas aeruginosa (strain ATCC 15692 / PAO1 / 1C / PRS 101 / LMG 12228) GN=ccoN2 PE=3 SV=1	1	1	1	1	2.5	2.5	2.5	53.09	475	475	0	6.9865	774000	2				161	512	TRUE	551	967;968	1895;1896	1895
tr|Q9I3G1|Q9I3G1_PSEAE	tr|Q9I3G1|Q9I3G1_PSEAE	2	2	2	>tr|Q9I3G1|Q9I3G1_PSEAE Cytochrome c oxidase, cbb3-type, CcoO subunit OS=Pseudomonas aeruginosa (strain ATCC 15692 / PAO1 / 1C / PRS 101 / LMG 12228) GN=ccoO2 PE=4 SV=1	1	2	2	2	16.3	16.3	16.3	22.778	202	202	0	16.341	1096400	2				162	526;536	True;True	566;576	995;996;1014	1967;1968;2021	1967;2021
tr|Q9I3G2|Q9I3G2_PSEAE	tr|Q9I3G2|Q9I3G2_PSEAE	2	2	2	>tr|Q9I3G2|Q9I3G2_PSEAE Cbb3-type cytochrome c oxidase subunit OS=Pseudomonas aeruginosa (strain ATCC 15692 / PAO1 / 1C / PRS 101 / LMG 12228) GN=ccoP2 PE=3 SV=1	1	2	2	2	9.4	9.4	9.4	33.812	308	308	0	11.019	1055400	1				163	525;637	True;True	565;683	994;1190	1966;2363	1966;2363
tr|Q9I3G6|Q9I3G6_PSEAE	tr|Q9I3G6|Q9I3G6_PSEAE	1	1	1	>tr|Q9I3G6|Q9I3G6_PSEAE Probable ferredoxin OS=Pseudomonas aeruginosa (strain ATCC 15692 / PAO1 / 1C / PRS 101 / LMG 12228) GN=PA1551 PE=4 SV=1	1	1	1	1	2.1	2.1	2.1	53.62	471	471	0	6.6756	4022800	2				164	208	TRUE	229	378;379	747;748	748
tr|Q9I400|Q9I400_PSEAE	tr|Q9I400|Q9I400_PSEAE	1	1	1	>tr|Q9I400|Q9I400_PSEAE Probable short-chain dehydrogenase OS=Pseudomonas aeruginosa (strain ATCC 15692 / PAO1 / 1C / PRS 101 / LMG 12228) GN=PA1344 PE=4 SV=1	1	1	1	1	5.3	5.3	5.3	27.397	264	264	0	5.9243	738950	2				165	24	TRUE	27	47	111;112	112
tr|Q9I428|Q9I428_PSEAE	tr|Q9I428|Q9I428_PSEAE	1	1	1	>tr|Q9I428|Q9I428_PSEAE Probable major facilitator superfamily (MFS) transporter OS=Pseudomonas aeruginosa (strain ATCC 15692 / PAO1 / 1C / PRS 101 / LMG 12228) GN=PA1316 PE=4 SV=1	1	1	1	1	6	6	6	53.13	513	513	0.0056818	5.5082	0	1				166	310	TRUE	336	565	1104	1104
tr|Q9I4W5|Q9I4W5_PSEAE	tr|Q9I4W5|Q9I4W5_PSEAE	1	1	1	>tr|Q9I4W5|Q9I4W5_PSEAE Bacterioferritin comigratory protein OS=Pseudomonas aeruginosa (strain ATCC 15692 / PAO1 / 1C / PRS 101 / LMG 12228) GN=bcp PE=4 SV=1	1	1	1	1	12.1	12.1	12.1	17.352	157	157	0.005814	5.5304	522680	0				167	455	TRUE	492	862	1666	1666
tr|Q9I5E3|Q9I5E3_PSEAE	tr|Q9I5E3|Q9I5E3_PSEAE	2	2	2	>tr|Q9I5E3|Q9I5E3_PSEAE Citrate synthase OS=Pseudomonas aeruginosa (strain ATCC 15692 / PAO1 / 1C / PRS 101 / LMG 12228) GN=prpC PE=3 SV=1	1	2	2	2	7.5	7.5	7.5	41.689	375	375	0	17.265	3312000	5				168	268;356	True;True	292;382	477;478;647	916;917;918;919;1262	917;1262
tr|Q9I5F6|Q9I5F6_PSEAE	tr|Q9I5F6|Q9I5F6_PSEAE	1	1	1	>tr|Q9I5F6|Q9I5F6_PSEAE Bifunctional protein PutA OS=Pseudomonas aeruginosa (strain ATCC 15692 / PAO1 / 1C / PRS 101 / LMG 12228) GN=putA PE=3 SV=1	1	1	1	1	1.4	1.4	1.4	115.63	1060	1060	0	10.557	1671600	3				169	396	TRUE	423	715;716	1379;1380;1381	1379
tr|Q9I5P0|Q9I5P0_PSEAE	tr|Q9I5P0|Q9I5P0_PSEAE	1	1	1	>tr|Q9I5P0|Q9I5P0_PSEAE Probable type II secretion system protein OS=Pseudomonas aeruginosa (strain ATCC 15692 / PAO1 / 1C / PRS 101 / LMG 12228) GN=PA0685 PE=3 SV=1	1	1	1	1	1	1	1	83.85	803	803	0	5.8831	6672700	0				170	552	TRUE	593	1039;1040	2063;2064	2064
tr|Q9I5T8|Q9I5T8_PSEAE	tr|Q9I5T8|Q9I5T8_PSEAE	1	1	1	>tr|Q9I5T8|Q9I5T8_PSEAE Probable two-component sensor OS=Pseudomonas aeruginosa (strain ATCC 15692 / PAO1 / 1C / PRS 101 / LMG 12228) GN=PA0600 PE=4 SV=1	1	1	1	1	1.1	1.1	1.1	89.516	797	797	0.0059524	5.6084	0	1				171	478	TRUE	515	908	1740	1740
tr|Q9I5U9|Q9I5U9_PSEAE	tr|Q9I5U9|Q9I5U9_PSEAE	14	14	14	>tr|Q9I5U9|Q9I5U9_PSEAE Uncharacterized protein OS=Pseudomonas aeruginosa (strain ATCC 15692 / PAO1 / 1C / PRS 101 / LMG 12228) GN=PA0588 PE=4 SV=1	1	14	14	14	27	27	27	73.722	640	640	0	120.73	54480000	42				172	60;116;355;362;364;368;406;409;415;432;445;527;609;632	True;True;True;True;True;True;True;True;True;True;True;True;True;True	68;69;129;130;381;388;390;395;433;437;445;467;482;567;654;678	117;118;223;224;225;645;646;654;657;658;666;667;732;733;738;739;749;750;819;820;845;846;997;1141;1142;1181;1182	298;299;300;496;497;498;499;500;501;1259;1260;1261;1269;1274;1275;1276;1277;1292;1293;1407;1408;1409;1410;1411;1417;1418;1419;1420;1437;1438;1595;1596;1597;1638;1639;1969;1970;2277;2278;2350;2351;2352	299;496;1259;1269;1276;1292;1407;1418;1438;1596;1639;1970;2278;2350	58;59	255;412
tr|Q9I5Y8|Q9I5Y8_PSEAE	tr|Q9I5Y8|Q9I5Y8_PSEAE	1	1	1	>tr|Q9I5Y8|Q9I5Y8_PSEAE Transketolase OS=Pseudomonas aeruginosa (strain ATCC 15692 / PAO1 / 1C / PRS 101 / LMG 12228) GN=tktA PE=1 SV=1	1	1	1	1	2.6	2.6	2.6	72.219	665	665	0	8.2681	1660900	2				173	164	TRUE	182	302	628;629	628
tr|Q9I659|Q9I659_PSEAE	tr|Q9I659|Q9I659_PSEAE	5	5	3	>tr|Q9I659|Q9I659_PSEAE Probable ClpA/B protease ATP binding subunit OS=Pseudomonas aeruginosa (strain ATCC 15692 / PAO1 / 1C / PRS 101 / LMG 12228) GN=PA0459 PE=4 SV=1	1	5	5	3	7.8	7.8	5.1	94.174	850	850	0	35.977	3145600	5				174	33;184;429;443;521	True;True;True;True;True	38;205;464;479;561	64;337;814;840;988	148;680;1585;1629;1955	148;680;1585;1629;1955
tr|Q9I671|Q9I671_PSEAE	tr|Q9I671|Q9I671_PSEAE	2	2	2	>tr|Q9I671|Q9I671_PSEAE Glutaryl-CoA dehydrogenase OS=Pseudomonas aeruginosa (strain ATCC 15692 / PAO1 / 1C / PRS 101 / LMG 12228) GN=gcdH PE=3 SV=1	1	2	2	2	7.1	7.1	7.1	43.311	393	393	0	10.967	2700400	2				175	231;471	True;True	254;508	415;890	815;1709	815;1709
tr|Q9I6A0|Q9I6A0_PSEAE	tr|Q9I6A0|Q9I6A0_PSEAE	2	2	2	>tr|Q9I6A0|Q9I6A0_PSEAE Probable cystathionine gamma-lyase OS=Pseudomonas aeruginosa (strain ATCC 15692 / PAO1 / 1C / PRS 101 / LMG 12228) GN=PA0400 PE=3 SV=1	1	2	2	2	10.9	10.9	10.9	42.786	394	394	0	17.234	2156600	3				176	343;387	True;True	369;414	623;624;697;698	1210;1211;1212;1340;1341	1211;1341
tr|Q9I6H5|Q9I6H5_PSEAE	tr|Q9I6H5|Q9I6H5_PSEAE	1	1	1	>tr|Q9I6H5|Q9I6H5_PSEAE D-3-phosphoglycerate dehydrogenase OS=Pseudomonas aeruginosa (strain ATCC 15692 / PAO1 / 1C / PRS 101 / LMG 12228) GN=serA PE=3 SV=1	1	1	1	1	2.7	2.7	2.7	44.216	409	409	0	7.0479	3515900	3				177	3	TRUE	3	4;5	4;5;6	5
tr|Q9I6J2|Q9I6J2_PSEAE	tr|Q9I6J2|Q9I6J2_PSEAE	1	1	1	>tr|Q9I6J2|Q9I6J2_PSEAE Putrescine aminotransferase OS=Pseudomonas aeruginosa (strain ATCC 15692 / PAO1 / 1C / PRS 101 / LMG 12228) GN=spuC PE=3 SV=1	1	1	1	1	4.6	4.6	4.6	50.452	456	456	0.005618	5.4655	962550	2				178	152	TRUE	169	284	602;603	603
tr|Q9I6Z3|Q9I6Z3_PSEAE	tr|Q9I6Z3|Q9I6Z3_PSEAE	7	7	7	>tr|Q9I6Z3|Q9I6Z3_PSEAE Alkyl hydroperoxide reductase subunit C OS=Pseudomonas aeruginosa (strain ATCC 15692 / PAO1 / 1C / PRS 101 / LMG 12228) GN=ahpC PE=4 SV=1	1	7	7	7	51.3	51.3	51.3	20.541	187	187	0	56.583	74616000	24				179	68;171;219;501;532;550;631	True;True;True;True;True;True;True	77;191;241;539;572;591;677	130;131;132;316;317;396;397;946;947;1009;1010;1036;1037;1180	318;319;320;321;322;323;324;325;326;651;652;776;777;778;779;1801;1802;1803;1804;2016;2017;2059;2060;2349	321;652;776;1804;2016;2060;2349
tr|Q9I762|Q9I762_PSEAE	tr|Q9I762|Q9I762_PSEAE	1	1	1	>tr|Q9I762|Q9I762_PSEAE Uncharacterized protein OS=Pseudomonas aeruginosa (strain ATCC 15692 / PAO1 / 1C / PRS 101 / LMG 12228) GN=PA0070 PE=4 SV=1	1	1	1	1	3.3	3.3	3.3	31.716	304	304	0.005988	5.6127	0	1				180	260	TRUE	284	463	900	900

## Sheet: 7-2 Sheet1
Protein IDs-C4HSL (full)
sp|O52759|RS4_PSEAE
sp|O52762|CATA_PSEAE
sp|O54439|ACP1_PSEAE
sp|O68822|AMPA_PSEAE
sp|Q9S508|PHZB2_PSEAE;sp|O69753|PHZB1_PSEAE
sp|P04739|FMPO_PSEAE
sp|P05384|DBHB_PSEAE
sp|P08308|OTCC_PSEAE
sp|P09591|EFTU_PSEAE
sp|P11221|OPRI_PSEAE
sp|P13794|PORF_PSEAE
sp|P13981|ARCA_PSEAE
sp|P13982|ARCC_PSEAE
sp|P30718|CH60_PSEAE
sp|P37799|BCCP_PSEAE
sp|P43336|PHHC_PSEAE
sp|P47204|FTSZ_PSEAE
sp|P53593|SUCC_PSEAE
sp|P53641|SODF_PSEAE
sp|Q51561|RPOB_PSEAE
sp|Q51567|SUCD_PSEAE
sp|Q59637|ODP1_PSEAE
sp|Q9HT18|ATPA_PSEAE
sp|Q9HT20|ATPB_PSEAE
sp|Q9HU83|HUTU_PSEAE
sp|Q9HV43|DNAK_PSEAE
sp|Q9HV59|PNP_PSEAE
sp|Q9HVA2|ILVC_PSEAE
sp|Q9HVY3|RS9_PSEAE
sp|Q9HWC9|RPOC_PSEAE
sp|Q9HWD2|EFG1_PSEAE;sp|Q9I244|EFG2_PSEAE
sp|Q9HWD8|RL2_PSEAE
sp|Q9HWE2|RL16_PSEAE
sp|Q9HZ71|RS1_PSEAE
sp|Q9HZE0|DHE2_PSEAE
sp|Q9HZJ2|FADB_PSEAE
sp|Q9I0A2|RL20_PSEAE
sp|Q9I0J6|NUOG_PSEAE
sp|Q9I0K4|ACEA_PSEAE
sp|Q9I2U8|SYQ_PSEAE
sp|Q9I2V5|ACNB_PSEAE
sp|Q9I3D1|DLDH2_PSEAE
sp|Q9I3F5|ACNA_PSEAE
sp|Q9I576|HPPD_PSEAE
sp|Q9I685|SAHH_PSEAE
sp|Q9I6M4|DAVT_PSEAE
sp|Q9I6M5|DAVD_PSEAE
sp|Q9I747|HCP1_PSEAE
tr|Q9HTD1|Q9HTD1_PSEAE
tr|Q9HTP2|Q9HTP2_PSEAE
tr|Q9HVJ1|Q9HVJ1_PSEAE
tr|Q9HW49|Q9HW49_PSEAE
tr|Q9HWP4|Q9HWP4_PSEAE
tr|Q9HWV0|Q9HWV0_PSEAE
tr|Q9I2C4|Q9I2C4_PSEAE;tr|Q9HX05|Q9HX05_PSEAE
tr|Q9HXA7|Q9HXA7_PSEAE
tr|Q9HXR8|Q9HXR8_PSEAE
tr|Q9HY81|Q9HY81_PSEAE
tr|Q9HYT5|Q9HYT5_PSEAE
tr|Q9HZK4|Q9HZK4_PSEAE
tr|Q9I017|Q9I017_PSEAE
tr|Q9I0L5|Q9I0L5_PSEAE
tr|Q9I0T1|Q9I0T1_PSEAE
tr|Q9I1H5|Q9I1H5_PSEAE
tr|Q9I246|Q9I246_PSEAE
tr|Q9I299|Q9I299_PSEAE
tr|Q9I3D3|Q9I3D3_PSEAE
tr|Q9I3D4|Q9I3D4_PSEAE
tr|Q9I3D5|Q9I3D5_PSEAE
tr|Q9I3G6|Q9I3G6_PSEAE
tr|Q9I491|Q9I491_PSEAE
tr|Q9I5B4|Q9I5B4_PSEAE
tr|Q9I5E3|Q9I5E3_PSEAE
tr|Q9I5U9|Q9I5U9_PSEAE
tr|Q9I611|Q9I611_PSEAE
tr|Q9I6Z3|Q9I6Z3_PSEAE
Probe 12 (subtracted)
tr|Q9HTK5|Q9HTK5_PSEAE;REV__tr|Q9HTK5|Q9HTK5_PSEAE
REV__tr|Q9HXW2|Q9HXW2_PSEAE
sp|G3XD23|WBPB_PSEAE
sp|O52760|RPOA_PSEAE
sp|O69754|PHZF_PSEAE
sp|O82850|RS2_PSEAE
sp|O82851|EFTS_PSEAE
sp|O86428|ILVE_PSEAE
sp|P11436|AMIE_PSEAE
sp|P15276|ALGP_PSEAE
sp|P28810|MMSA_PSEAE
sp|P37798|ACCC_PSEAE
sp|P48247|GSA_PSEAE
sp|P72173|AAT_PSEAE
sp|Q51342|PUR1_PSEAE
sp|Q51422|SYDND_PSEAE
sp|Q59636|NDK_PSEAE
sp|Q59638|ODP2_PSEAE
sp|Q9HT16|ATPF_PSEAE
sp|Q9HT17|ATPD_PSEAE
sp|Q9HTD7|ASPA_PSEAE
sp|Q9HTV1|RHO_PSEAE
sp|Q9HU21|RMLC_PSEAE
sp|Q9HU65|GLNA_PSEAE
sp|Q9HUC8|SYR_PSEAE
sp|Q9HUF1|MSRA_PSEAE
sp|Q9HUM6|PURA_PSEAE
sp|Q9HVF1|MQO2_PSEAE
sp|Q9HVN5|CLPB_PSEAE
sp|Q9HWC8|RL7_PSEAE
sp|Q9HWD1|RS7_PSEAE
sp|Q9HWD5|RL3_PSEAE
sp|Q9HWE4|RS17_PSEAE
sp|Q9HWE5|RL14_PSEAE
sp|Q9HWE8|RS14_PSEAE
sp|Q9HWF2|RS5_PSEAE
sp|Q9HWF7|RS13_PSEAE
sp|Q9HXN2|PUR4_PSEAE
sp|Q9HYR9|CLPP2_PSEAE
sp|Q9HZ76|WBPE_PSEAE
sp|Q9HZA7|ACCD_PSEAE
sp|Q9HZP6|ETFB_PSEAE
sp|Q9I0J9|NUOCD_PSEAE
sp|Q9I0Q0|PQSH_PSEAE
sp|Q9I1L9|DLDH1_PSEAE
sp|Q9I1M1|ODBB_PSEAE
sp|Q9I1M2|ODBA_PSEAE
sp|Q9I2A8|ATOB_PSEAE
sp|Q9I3C5|HTPG_PSEAE
sp|Q9I3D2|ODO2_PSEAE
sp|Q9I4Z4|PAL_PSEAE
sp|Q9I558|ACSA1_PSEAE
sp|Q9I589|CBPD_PSEAE
sp|Q9I5G9|Y760_PSEAE
sp|Q9I5Y1|ALF_PSEAE
sp|Q9I5Y4|PGK_PSEAE
sp|Q9I636|MASZ_PSEAE
sp|Q9I7C4|DPO3B_PSEAE
sp|Q9X2T1|THIO_PSEAE
tr|Q9HTD9|Q9HTD9_PSEAE
tr|Q9HUC4|Q9HUC4_PSEAE
tr|Q9HUD3|Q9HUD3_PSEAE
tr|Q9HV54|Q9HV54_PSEAE
tr|Q9HV96|Q9HV96_PSEAE
tr|Q9HVY4|Q9HVY4_PSEAE
tr|Q9HVY6|Q9HVY6_PSEAE
tr|Q9HW32|Q9HW32_PSEAE
tr|Q9HW72|Q9HW72_PSEAE
tr|Q9HWG9|Q9HWG9_PSEAE
tr|Q9HWN0|Q9HWN0_PSEAE
tr|Q9HWQ0|Q9HWQ0_PSEAE
tr|Q9HXJ2|Q9HXJ2_PSEAE
tr|Q9HXU8|Q9HXU8_PSEAE
tr|Q9HY13|Q9HY13_PSEAE
tr|Q9HY77|Q9HY77_PSEAE
tr|Q9HY79|Q9HY79_PSEAE
tr|Q9HYZ6|Q9HYZ6_PSEAE
tr|Q9I028|Q9I028_PSEAE
tr|Q9I056|Q9I056_PSEAE
tr|Q9I0L4|Q9I0L4_PSEAE
tr|Q9I148|Q9I148_PSEAE
tr|Q9I1E7|Q9I1E7_PSEAE
tr|Q9I1E8|Q9I1E8_PSEAE
tr|Q9I1H3|Q9I1H3_PSEAE
tr|Q9I1Z4|Q9I1Z4_PSEAE
tr|Q9I2A2|Q9I2A2_PSEAE
tr|Q9I2A6|Q9I2A6_PSEAE
tr|Q9I2H1|Q9I2H1_PSEAE
tr|Q9I2R2|Q9I2R2_PSEAE
tr|Q9I2V3|Q9I2V3_PSEAE
tr|Q9I2W9|Q9I2W9_PSEAE
tr|Q9I393|Q9I393_PSEAE
tr|Q9I3G0|Q9I3G0_PSEAE
tr|Q9I3G1|Q9I3G1_PSEAE
tr|Q9I3G2|Q9I3G2_PSEAE
tr|Q9I400|Q9I400_PSEAE
tr|Q9I428|Q9I428_PSEAE
tr|Q9I4W5|Q9I4W5_PSEAE
tr|Q9I5F6|Q9I5F6_PSEAE
tr|Q9I5P0|Q9I5P0_PSEAE
tr|Q9I5T8|Q9I5T8_PSEAE
tr|Q9I5Y8|Q9I5Y8_PSEAE
tr|Q9I659|Q9I659_PSEAE
tr|Q9I671|Q9I671_PSEAE
tr|Q9I6A0|Q9I6A0_PSEAE
tr|Q9I6H5|Q9I6H5_PSEAE
tr|Q9I6J2|Q9I6J2_PSEAE
tr|Q9I762|Q9I762_PSEAE

## Sheet: 7-2 Sheet2
Protein IDs-Probe 12 (subtracted)	Protein IDs-Probe 12 (full)			Fasta headers	Number of proteins	Peptides	Razor + unique peptides
tr|Q9HTK5|Q9HTK5_PSEAE;REV__tr|Q9HTK5|Q9HTK5_PSEAE	tr|Q9HTK5|Q9HTK5_PSEAE;REV__tr|Q9HTK5|Q9HTK5_PSEAE			>tr|Q9HTK5|Q9HTK5_PSEAE Glycolate oxidase iron-sulfur subunit OS=Pseudomonas aeruginosa (strain ATCC 15692 / PAO1 / 1C / PRS 101 / LMG 12228) GN=glcF PE=4 SV=1;>tr|Q9HTK5|Q9HTK5_PSEAE Glycolate oxidase iron-sulfur subunit OS=Pseudomonas aeruginosa (strain	2	1	1
REV__tr|Q9HXW2|Q9HXW2_PSEAE	REV__tr|Q9HXW2|Q9HXW2_PSEAE			>tr|Q9HXW2|Q9HXW2_PSEAE Probable transcriptional regulator OS=Pseudomonas aeruginosa (strain ATCC 15692 / PAO1 / 1C / PRS 101 / LMG 12228) GN=PA3678 PE=4 SV=1	1	1	1
sp|G3XD23|WBPB_PSEAE	sp|G3XD23|WBPB_PSEAE			>sp|G3XD23|WBPB_PSEAE UDP-N-acetyl-2-amino-2-deoxy-D-glucuronate oxidase OS=Pseudomonas aeruginosa (strain ATCC 15692 / PAO1 / 1C / PRS 101 / LMG 12228) GN=wbpB PE=1 SV=1	1	1	1
sp|O52760|RPOA_PSEAE	sp|O52759|RS4_PSEAE			>sp|O52759|RS4_PSEAE 30S ribosomal protein S4 OS=Pseudomonas aeruginosa (strain ATCC 15692 / PAO1 / 1C / PRS 101 / LMG 12228) GN=rpsD PE=3 SV=2	1	2	2
sp|O69754|PHZF_PSEAE	sp|O52760|RPOA_PSEAE			>sp|O52760|RPOA_PSEAE DNA-directed RNA polymerase subunit alpha OS=Pseudomonas aeruginosa (strain ATCC 15692 / PAO1 / 1C / PRS 101 / LMG 12228) GN=rpoA PE=3 SV=2	1	3	3
sp|O82850|RS2_PSEAE	sp|O52762|CATA_PSEAE			>sp|O52762|CATA_PSEAE Catalase OS=Pseudomonas aeruginosa (strain ATCC 15692 / PAO1 / 1C / PRS 101 / LMG 12228) GN=katA PE=1 SV=1	1	8	8
sp|O82851|EFTS_PSEAE	sp|O54439|ACP1_PSEAE			>sp|O54439|ACP1_PSEAE Acyl carrier protein 1 OS=Pseudomonas aeruginosa (strain ATCC 15692 / PAO1 / 1C / PRS 101 / LMG 12228) GN=acpP1 PE=3 SV=4	1	2	2
sp|O86428|ILVE_PSEAE	sp|O68822|AMPA_PSEAE			>sp|O68822|AMPA_PSEAE Cytosol aminopeptidase OS=Pseudomonas aeruginosa (strain ATCC 15692 / PAO1 / 1C / PRS 101 / LMG 12228) GN=pepA PE=3 SV=1	1	6	6
sp|P11436|AMIE_PSEAE	sp|O69754|PHZF_PSEAE			>sp|O69754|PHZF_PSEAE Trans-2,3-dihydro-3-hydroxyanthranilate isomerase OS=Pseudomonas aeruginosa (strain ATCC 15692 / PAO1 / 1C / PRS 101 / LMG 12228) GN=phzF1 PE=3 SV=2	1	2	2
sp|P15276|ALGP_PSEAE	sp|O82850|RS2_PSEAE			>sp|O82850|RS2_PSEAE 30S ribosomal protein S2 OS=Pseudomonas aeruginosa (strain ATCC 15692 / PAO1 / 1C / PRS 101 / LMG 12228) GN=rpsB PE=3 SV=2	1	2	2
sp|P28810|MMSA_PSEAE	sp|O82851|EFTS_PSEAE			>sp|O82851|EFTS_PSEAE Elongation factor Ts OS=Pseudomonas aeruginosa (strain ATCC 15692 / PAO1 / 1C / PRS 101 / LMG 12228) GN=tsf PE=3 SV=1	1	3	3
sp|P37798|ACCC_PSEAE	sp|O86428|ILVE_PSEAE			>sp|O86428|ILVE_PSEAE Branched-chain-amino-acid aminotransferase OS=Pseudomonas aeruginosa (strain ATCC 15692 / PAO1 / 1C / PRS 101 / LMG 12228) GN=ilvE PE=1 SV=2	1	3	3
sp|P48247|GSA_PSEAE	sp|P04739|FMPO_PSEAE			>sp|P04739|FMPO_PSEAE Fimbrial protein OS=Pseudomonas aeruginosa (strain ATCC 15692 / PAO1 / 1C / PRS 101 / LMG 12228) GN=pilA PE=1 SV=1	1	3	3
sp|P72173|AAT_PSEAE	sp|P05384|DBHB_PSEAE			>sp|P05384|DBHB_PSEAE DNA-binding protein HU-beta OS=Pseudomonas aeruginosa (strain ATCC 15692 / PAO1 / 1C / PRS 101 / LMG 12228) GN=hupB PE=1 SV=3	1	2	2
sp|Q51342|PUR1_PSEAE	sp|P08308|OTCC_PSEAE			>sp|P08308|OTCC_PSEAE Ornithine carbamoyltransferase, catabolic OS=Pseudomonas aeruginosa (strain ATCC 15692 / PAO1 / 1C / PRS 101 / LMG 12228) GN=arcB PE=1 SV=3	1	9	9
sp|Q51422|SYDND_PSEAE	sp|P09591|EFTU_PSEAE			>sp|P09591|EFTU_PSEAE Elongation factor Tu OS=Pseudomonas aeruginosa (strain ATCC 15692 / PAO1 / 1C / PRS 101 / LMG 12228) GN=tufA PE=1 SV=2	1	13	13
sp|Q59636|NDK_PSEAE	sp|P11221|OPRI_PSEAE			>sp|P11221|OPRI_PSEAE Major outer membrane lipoprotein OS=Pseudomonas aeruginosa (strain ATCC 15692 / PAO1 / 1C / PRS 101 / LMG 12228) GN=oprI PE=3 SV=1	1	1	1
sp|Q59638|ODP2_PSEAE	sp|P11436|AMIE_PSEAE			>sp|P11436|AMIE_PSEAE Aliphatic amidase OS=Pseudomonas aeruginosa (strain ATCC 15692 / PAO1 / 1C / PRS 101 / LMG 12228) GN=amiE PE=1 SV=2	1	3	3
sp|Q9HT16|ATPF_PSEAE	sp|P13794|PORF_PSEAE			>sp|P13794|PORF_PSEAE Outer membrane porin F OS=Pseudomonas aeruginosa (strain ATCC 15692 / PAO1 / 1C / PRS 101 / LMG 12228) GN=oprF PE=1 SV=1	1	6	6
sp|Q9HT17|ATPD_PSEAE	sp|P13981|ARCA_PSEAE			>sp|P13981|ARCA_PSEAE Arginine deiminase OS=Pseudomonas aeruginosa (strain ATCC 15692 / PAO1 / 1C / PRS 101 / LMG 12228) GN=arcA PE=1 SV=2	1	18	18
sp|Q9HTD7|ASPA_PSEAE	sp|P13982|ARCC_PSEAE			>sp|P13982|ARCC_PSEAE Carbamate kinase OS=Pseudomonas aeruginosa (strain ATCC 15692 / PAO1 / 1C / PRS 101 / LMG 12228) GN=arcC PE=3 SV=1	1	3	3
sp|Q9HTV1|RHO_PSEAE	sp|P15276|ALGP_PSEAE			>sp|P15276|ALGP_PSEAE Transcriptional regulatory protein AlgP OS=Pseudomonas aeruginosa (strain ATCC 15692 / PAO1 / 1C / PRS 101 / LMG 12228) GN=algP PE=4 SV=2	1	1	1
sp|Q9HU21|RMLC_PSEAE	sp|P28810|MMSA_PSEAE			>sp|P28810|MMSA_PSEAE Methylmalonate-semialdehyde dehydrogenase [acylating] OS=Pseudomonas aeruginosa (strain ATCC 15692 / PAO1 / 1C / PRS 101 / LMG 12228) GN=mmsA PE=1 SV=2	1	1	1
sp|Q9HU65|GLNA_PSEAE	sp|P30718|CH60_PSEAE			>sp|P30718|CH60_PSEAE 60 kDa chaperonin OS=Pseudomonas aeruginosa (strain ATCC 15692 / PAO1 / 1C / PRS 101 / LMG 12228) GN=groL PE=1 SV=3	1	22	22
sp|Q9HUC8|SYR_PSEAE	sp|P37798|ACCC_PSEAE			>sp|P37798|ACCC_PSEAE Biotin carboxylase OS=Pseudomonas aeruginosa (strain ATCC 15692 / PAO1 / 1C / PRS 101 / LMG 12228) GN=accC PE=1 SV=1	1	4	4
sp|Q9HUF1|MSRA_PSEAE	sp|P37799|BCCP_PSEAE			>sp|P37799|BCCP_PSEAE Biotin carboxyl carrier protein of acetyl-CoA carboxylase OS=Pseudomonas aeruginosa (strain ATCC 15692 / PAO1 / 1C / PRS 101 / LMG 12228) GN=accB PE=3 SV=1	1	8	8
sp|Q9HUM6|PURA_PSEAE	sp|P43336|PHHC_PSEAE			>sp|P43336|PHHC_PSEAE Aromatic-amino-acid aminotransferase OS=Pseudomonas aeruginosa (strain ATCC 15692 / PAO1 / 1C / PRS 101 / LMG 12228) GN=phhC PE=3 SV=2	1	5	5
sp|Q9HVF1|MQO2_PSEAE	sp|P47204|FTSZ_PSEAE			>sp|P47204|FTSZ_PSEAE Cell division protein FtsZ OS=Pseudomonas aeruginosa (strain ATCC 15692 / PAO1 / 1C / PRS 101 / LMG 12228) GN=ftsZ PE=1 SV=2	1	1	1
sp|Q9HVN5|CLPB_PSEAE	sp|P48247|GSA_PSEAE			>sp|P48247|GSA_PSEAE Glutamate-1-semialdehyde 2,1-aminomutase OS=Pseudomonas aeruginosa (strain ATCC 15692 / PAO1 / 1C / PRS 101 / LMG 12228) GN=hemL PE=1 SV=2	1	1	1
sp|Q9HWC8|RL7_PSEAE	sp|P53593|SUCC_PSEAE			>sp|P53593|SUCC_PSEAE Succinyl-CoA ligase [ADP-forming] subunit beta OS=Pseudomonas aeruginosa (strain ATCC 15692 / PAO1 / 1C / PRS 101 / LMG 12228) GN=sucC PE=3 SV=2	1	14	14
sp|Q9HWD1|RS7_PSEAE	sp|P53641|SODF_PSEAE			>sp|P53641|SODF_PSEAE Superoxide dismutase [Fe] OS=Pseudomonas aeruginosa (strain ATCC 15692 / PAO1 / 1C / PRS 101 / LMG 12228) GN=sodB PE=3 SV=3	1	3	3
sp|Q9HWD5|RL3_PSEAE	sp|P72173|AAT_PSEAE			>sp|P72173|AAT_PSEAE Aspartate aminotransferase OS=Pseudomonas aeruginosa (strain ATCC 15692 / PAO1 / 1C / PRS 101 / LMG 12228) GN=aspC PE=3 SV=2	1	5	5
sp|Q9HWE4|RS17_PSEAE	sp|Q51342|PUR1_PSEAE			>sp|Q51342|PUR1_PSEAE Amidophosphoribosyltransferase OS=Pseudomonas aeruginosa (strain ATCC 15692 / PAO1 / 1C / PRS 101 / LMG 12228) GN=purF PE=3 SV=3	1	1	1
sp|Q9HWE5|RL14_PSEAE	sp|Q51422|SYDND_PSEAE			>sp|Q51422|SYDND_PSEAE Aspartate--tRNA(Asp/Asn) ligase OS=Pseudomonas aeruginosa (strain ATCC 15692 / PAO1 / 1C / PRS 101 / LMG 12228) GN=aspS PE=1 SV=2	1	2	2
sp|Q9HWE8|RS14_PSEAE	sp|Q51561|RPOB_PSEAE			>sp|Q51561|RPOB_PSEAE DNA-directed RNA polymerase subunit beta OS=Pseudomonas aeruginosa (strain ATCC 15692 / PAO1 / 1C / PRS 101 / LMG 12228) GN=rpoB PE=3 SV=2	1	6	6
sp|Q9HWF2|RS5_PSEAE	sp|Q51567|SUCD_PSEAE			>sp|Q51567|SUCD_PSEAE Succinyl-CoA ligase [ADP-forming] subunit alpha OS=Pseudomonas aeruginosa (strain ATCC 15692 / PAO1 / 1C / PRS 101 / LMG 12228) GN=sucD PE=3 SV=2	1	6	6
sp|Q9HWF7|RS13_PSEAE	sp|Q59636|NDK_PSEAE			>sp|Q59636|NDK_PSEAE Nucleoside diphosphate kinase OS=Pseudomonas aeruginosa (strain ATCC 15692 / PAO1 / 1C / PRS 101 / LMG 12228) GN=ndk PE=3 SV=2	1	1	1
sp|Q9HXN2|PUR4_PSEAE	sp|Q59637|ODP1_PSEAE			>sp|Q59637|ODP1_PSEAE Pyruvate dehydrogenase E1 component OS=Pseudomonas aeruginosa (strain ATCC 15692 / PAO1 / 1C / PRS 101 / LMG 12228) GN=aceE PE=3 SV=2	1	10	10
sp|Q9HYR9|CLPP2_PSEAE	sp|Q59638|ODP2_PSEAE			>sp|Q59638|ODP2_PSEAE Dihydrolipoyllysine-residue acetyltransferase component of pyruvate dehydrogenase complex OS=Pseudomonas aeruginosa (strain ATCC 15692 / PAO1 / 1C / PRS 101 / LMG 12228) GN=aceF PE=2 SV=2	1	5	5
sp|Q9HZ76|WBPE_PSEAE	sp|Q9HT16|ATPF_PSEAE			>sp|Q9HT16|ATPF_PSEAE ATP synthase subunit b OS=Pseudomonas aeruginosa (strain ATCC 15692 / PAO1 / 1C / PRS 101 / LMG 12228) GN=atpF PE=3 SV=1	1	2	2
sp|Q9HZA7|ACCD_PSEAE	sp|Q9HT17|ATPD_PSEAE			>sp|Q9HT17|ATPD_PSEAE ATP synthase subunit delta OS=Pseudomonas aeruginosa (strain ATCC 15692 / PAO1 / 1C / PRS 101 / LMG 12228) GN=atpH PE=3 SV=1	1	1	1
sp|Q9HZP6|ETFB_PSEAE	sp|Q9HT18|ATPA_PSEAE			>sp|Q9HT18|ATPA_PSEAE ATP synthase subunit alpha OS=Pseudomonas aeruginosa (strain ATCC 15692 / PAO1 / 1C / PRS 101 / LMG 12228) GN=atpA PE=3 SV=1	1	14	14
sp|Q9I0J9|NUOCD_PSEAE	sp|Q9HT20|ATPB_PSEAE			>sp|Q9HT20|ATPB_PSEAE ATP synthase subunit beta OS=Pseudomonas aeruginosa (strain ATCC 15692 / PAO1 / 1C / PRS 101 / LMG 12228) GN=atpD PE=3 SV=1	1	10	10
sp|Q9I0Q0|PQSH_PSEAE	sp|Q9HTD7|ASPA_PSEAE			>sp|Q9HTD7|ASPA_PSEAE Aspartate ammonia-lyase OS=Pseudomonas aeruginosa (strain ATCC 15692 / PAO1 / 1C / PRS 101 / LMG 12228) GN=aspA PE=3 SV=1	1	1	1
sp|Q9I1L9|DLDH1_PSEAE	sp|Q9HTV1|RHO_PSEAE			>sp|Q9HTV1|RHO_PSEAE Transcription termination factor Rho OS=Pseudomonas aeruginosa (strain ATCC 15692 / PAO1 / 1C / PRS 101 / LMG 12228) GN=rho PE=3 SV=1	1	1	1
sp|Q9I1M1|ODBB_PSEAE	sp|Q9HU21|RMLC_PSEAE			>sp|Q9HU21|RMLC_PSEAE dTDP-4-dehydrorhamnose 3,5-epimerase OS=Pseudomonas aeruginosa (strain ATCC 15692 / PAO1 / 1C / PRS 101 / LMG 12228) GN=rmlC PE=1 SV=1	1	1	1
sp|Q9I1M2|ODBA_PSEAE	sp|Q9HU65|GLNA_PSEAE			>sp|Q9HU65|GLNA_PSEAE Glutamine synthetase OS=Pseudomonas aeruginosa (strain ATCC 15692 / PAO1 / 1C / PRS 101 / LMG 12228) GN=glnA PE=1 SV=1	1	4	4
sp|Q9I2A8|ATOB_PSEAE	sp|Q9HU83|HUTU_PSEAE			>sp|Q9HU83|HUTU_PSEAE Urocanate hydratase OS=Pseudomonas aeruginosa (strain ATCC 15692 / PAO1 / 1C / PRS 101 / LMG 12228) GN=hutU PE=1 SV=1	1	3	3
sp|Q9I3C5|HTPG_PSEAE	sp|Q9HUC8|SYR_PSEAE			>sp|Q9HUC8|SYR_PSEAE Arginine--tRNA ligase OS=Pseudomonas aeruginosa (strain ATCC 15692 / PAO1 / 1C / PRS 101 / LMG 12228) GN=argS PE=3 SV=1	1	1	1
sp|Q9I3D2|ODO2_PSEAE	sp|Q9HUF1|MSRA_PSEAE			>sp|Q9HUF1|MSRA_PSEAE Peptide methionine sulfoxide reductase MsrA OS=Pseudomonas aeruginosa (strain ATCC 15692 / PAO1 / 1C / PRS 101 / LMG 12228) GN=msrA PE=3 SV=1	1	1	1
sp|Q9I4Z4|PAL_PSEAE	sp|Q9HUM6|PURA_PSEAE			>sp|Q9HUM6|PURA_PSEAE Adenylosuccinate synthetase OS=Pseudomonas aeruginosa (strain ATCC 15692 / PAO1 / 1C / PRS 101 / LMG 12228) GN=purA PE=3 SV=1	1	2	2
sp|Q9I558|ACSA1_PSEAE	sp|Q9HV43|DNAK_PSEAE			>sp|Q9HV43|DNAK_PSEAE Chaperone protein DnaK OS=Pseudomonas aeruginosa (strain ATCC 15692 / PAO1 / 1C / PRS 101 / LMG 12228) GN=dnaK PE=3 SV=1	1	4	4
sp|Q9I589|CBPD_PSEAE	sp|Q9HV59|PNP_PSEAE			>sp|Q9HV59|PNP_PSEAE Polyribonucleotide nucleotidyltransferase OS=Pseudomonas aeruginosa (strain ATCC 15692 / PAO1 / 1C / PRS 101 / LMG 12228) GN=pnp PE=3 SV=1	1	3	3
sp|Q9I5G9|Y760_PSEAE	sp|Q9HVA2|ILVC_PSEAE			>sp|Q9HVA2|ILVC_PSEAE Ketol-acid reductoisomerase OS=Pseudomonas aeruginosa (strain ATCC 15692 / PAO1 / 1C / PRS 101 / LMG 12228) GN=ilvC PE=1 SV=1	1	1	1
sp|Q9I5Y1|ALF_PSEAE	sp|Q9HVF1|MQO2_PSEAE			>sp|Q9HVF1|MQO2_PSEAE Probable malate:quinone oxidoreductase 2 OS=Pseudomonas aeruginosa (strain ATCC 15692 / PAO1 / 1C / PRS 101 / LMG 12228) GN=mqo2 PE=3 SV=1	1	1	1
sp|Q9I5Y4|PGK_PSEAE	sp|Q9HVN5|CLPB_PSEAE			>sp|Q9HVN5|CLPB_PSEAE Chaperone protein ClpB OS=Pseudomonas aeruginosa (strain ATCC 15692 / PAO1 / 1C / PRS 101 / LMG 12228) GN=clpB PE=3 SV=1	1	4	2
sp|Q9I636|MASZ_PSEAE	sp|Q9HVY3|RS9_PSEAE			>sp|Q9HVY3|RS9_PSEAE 30S ribosomal protein S9 OS=Pseudomonas aeruginosa (strain ATCC 15692 / PAO1 / 1C / PRS 101 / LMG 12228) GN=rpsI PE=3 SV=1	1	1	1
sp|Q9I7C4|DPO3B_PSEAE	sp|Q9HWC8|RL7_PSEAE			>sp|Q9HWC8|RL7_PSEAE 50S ribosomal protein L7/L12 OS=Pseudomonas aeruginosa (strain ATCC 15692 / PAO1 / 1C / PRS 101 / LMG 12228) GN=rplL PE=3 SV=1	1	1	1
sp|Q9X2T1|THIO_PSEAE	sp|Q9HWC9|RPOC_PSEAE			>sp|Q9HWC9|RPOC_PSEAE DNA-directed RNA polymerase subunit beta OS=Pseudomonas aeruginosa (strain ATCC 15692 / PAO1 / 1C / PRS 101 / LMG 12228) GN=rpoC PE=3 SV=1	1	14	14
tr|Q9HTD9|Q9HTD9_PSEAE	sp|Q9HWD1|RS7_PSEAE			>sp|Q9HWD1|RS7_PSEAE 30S ribosomal protein S7 OS=Pseudomonas aeruginosa (strain ATCC 15692 / PAO1 / 1C / PRS 101 / LMG 12228) GN=rpsG PE=3 SV=1	1	1	1
tr|Q9HUC4|Q9HUC4_PSEAE	sp|Q9HWD2|EFG1_PSEAE;sp|Q9I244|EFG2_PSEAE			>sp|Q9HWD2|EFG1_PSEAE Elongation factor G 1 OS=Pseudomonas aeruginosa (strain ATCC 15692 / PAO1 / 1C / PRS 101 / LMG 12228) GN=fusA PE=1 SV=1	2	13	13
tr|Q9HUD3|Q9HUD3_PSEAE	sp|Q9HWD5|RL3_PSEAE			>sp|Q9HWD5|RL3_PSEAE 50S ribosomal protein L3 OS=Pseudomonas aeruginosa (strain ATCC 15692 / PAO1 / 1C / PRS 101 / LMG 12228) GN=rplC PE=3 SV=1	1	1	1
tr|Q9HV54|Q9HV54_PSEAE	sp|Q9HWD8|RL2_PSEAE			>sp|Q9HWD8|RL2_PSEAE 50S ribosomal protein L2 OS=Pseudomonas aeruginosa (strain ATCC 15692 / PAO1 / 1C / PRS 101 / LMG 12228) GN=rplB PE=3 SV=1	1	2	2
tr|Q9HV96|Q9HV96_PSEAE	sp|Q9HWE2|RL16_PSEAE			>sp|Q9HWE2|RL16_PSEAE 50S ribosomal protein L16 OS=Pseudomonas aeruginosa (strain ATCC 15692 / PAO1 / 1C / PRS 101 / LMG 12228) GN=rplP PE=3 SV=1	1	3	3
tr|Q9HVY4|Q9HVY4_PSEAE	sp|Q9HWE4|RS17_PSEAE			>sp|Q9HWE4|RS17_PSEAE 30S ribosomal protein S17 OS=Pseudomonas aeruginosa (strain ATCC 15692 / PAO1 / 1C / PRS 101 / LMG 12228) GN=rpsQ PE=3 SV=1	1	1	1
tr|Q9HVY6|Q9HVY6_PSEAE	sp|Q9HWE5|RL14_PSEAE			>sp|Q9HWE5|RL14_PSEAE 50S ribosomal protein L14 OS=Pseudomonas aeruginosa (strain ATCC 15692 / PAO1 / 1C / PRS 101 / LMG 12228) GN=rplN PE=3 SV=1	1	1	1
tr|Q9HW32|Q9HW32_PSEAE	sp|Q9HWE8|RS14_PSEAE			>sp|Q9HWE8|RS14_PSEAE 30S ribosomal protein S14 OS=Pseudomonas aeruginosa (strain ATCC 15692 / PAO1 / 1C / PRS 101 / LMG 12228) GN=rpsN PE=3 SV=1	1	1	1
tr|Q9HW72|Q9HW72_PSEAE	sp|Q9HWF2|RS5_PSEAE			>sp|Q9HWF2|RS5_PSEAE 30S ribosomal protein S5 OS=Pseudomonas aeruginosa (strain ATCC 15692 / PAO1 / 1C / PRS 101 / LMG 12228) GN=rpsE PE=3 SV=1	1	1	1
tr|Q9HWG9|Q9HWG9_PSEAE	sp|Q9HWF7|RS13_PSEAE			>sp|Q9HWF7|RS13_PSEAE 30S ribosomal protein S13 OS=Pseudomonas aeruginosa (strain ATCC 15692 / PAO1 / 1C / PRS 101 / LMG 12228) GN=rpsM PE=3 SV=1	1	1	1
tr|Q9HWN0|Q9HWN0_PSEAE	sp|Q9HXN2|PUR4_PSEAE			>sp|Q9HXN2|PUR4_PSEAE Phosphoribosylformylglycinamidine synthase OS=Pseudomonas aeruginosa (strain ATCC 15692 / PAO1 / 1C / PRS 101 / LMG 12228) GN=purL PE=3 SV=1	1	1	1
tr|Q9HWQ0|Q9HWQ0_PSEAE	sp|Q9HYR9|CLPP2_PSEAE			>sp|Q9HYR9|CLPP2_PSEAE ATP-dependent Clp protease proteolytic subunit 2 OS=Pseudomonas aeruginosa (strain ATCC 15692 / PAO1 / 1C / PRS 101 / LMG 12228) GN=clpP2 PE=3 SV=1	1	1	1
tr|Q9HXJ2|Q9HXJ2_PSEAE	sp|Q9HZ71|RS1_PSEAE			>sp|Q9HZ71|RS1_PSEAE 30S ribosomal protein S1 OS=Pseudomonas aeruginosa (strain ATCC 15692 / PAO1 / 1C / PRS 101 / LMG 12228) GN=rpsA PE=3 SV=1	1	6	6
tr|Q9HXU8|Q9HXU8_PSEAE	sp|Q9HZ76|WBPE_PSEAE			>sp|Q9HZ76|WBPE_PSEAE UDP-2-acetamido-2-deoxy-3-oxo-D-glucuronate aminotransferase OS=Pseudomonas aeruginosa (strain ATCC 15692 / PAO1 / 1C / PRS 101 / LMG 12228) GN=wbpE PE=1 SV=1	1	1	1
tr|Q9HY13|Q9HY13_PSEAE	sp|Q9HZA7|ACCD_PSEAE			>sp|Q9HZA7|ACCD_PSEAE Acetyl-coenzyme A carboxylase carboxyl transferase subunit beta OS=Pseudomonas aeruginosa (strain ATCC 15692 / PAO1 / 1C / PRS 101 / LMG 12228) GN=accD PE=1 SV=1	1	1	1
tr|Q9HY77|Q9HY77_PSEAE	sp|Q9HZE0|DHE2_PSEAE			>sp|Q9HZE0|DHE2_PSEAE NAD-specific glutamate dehydrogenase OS=Pseudomonas aeruginosa (strain ATCC 15692 / PAO1 / 1C / PRS 101 / LMG 12228) GN=gdhB PE=1 SV=1	1	12	12
tr|Q9HY79|Q9HY79_PSEAE	sp|Q9HZJ2|FADB_PSEAE			>sp|Q9HZJ2|FADB_PSEAE Fatty acid oxidation complex subunit alpha OS=Pseudomonas aeruginosa (strain ATCC 15692 / PAO1 / 1C / PRS 101 / LMG 12228) GN=fadB PE=3 SV=1	1	4	4
tr|Q9HYZ6|Q9HYZ6_PSEAE	sp|Q9HZP6|ETFB_PSEAE			>sp|Q9HZP6|ETFB_PSEAE Electron transfer flavoprotein subunit beta OS=Pseudomonas aeruginosa (strain ATCC 15692 / PAO1 / 1C / PRS 101 / LMG 12228) GN=etfB PE=3 SV=1	1	3	3
tr|Q9I028|Q9I028_PSEAE	sp|Q9I0A2|RL20_PSEAE			>sp|Q9I0A2|RL20_PSEAE 50S ribosomal protein L20 OS=Pseudomonas aeruginosa (strain ATCC 15692 / PAO1 / 1C / PRS 101 / LMG 12228) GN=rplT PE=3 SV=1	1	1	1
tr|Q9I056|Q9I056_PSEAE	sp|Q9I0J6|NUOG_PSEAE			>sp|Q9I0J6|NUOG_PSEAE NADH-quinone oxidoreductase subunit G OS=Pseudomonas aeruginosa (strain ATCC 15692 / PAO1 / 1C / PRS 101 / LMG 12228) GN=nuoG PE=3 SV=1	1	2	2
tr|Q9I0L4|Q9I0L4_PSEAE	sp|Q9I0J9|NUOCD_PSEAE			>sp|Q9I0J9|NUOCD_PSEAE NADH-quinone oxidoreductase subunit C/D OS=Pseudomonas aeruginosa (strain ATCC 15692 / PAO1 / 1C / PRS 101 / LMG 12228) GN=nuoC PE=3 SV=1	1	1	1
tr|Q9I148|Q9I148_PSEAE	sp|Q9I0K4|ACEA_PSEAE			>sp|Q9I0K4|ACEA_PSEAE Isocitrate lyase OS=Pseudomonas aeruginosa (strain ATCC 15692 / PAO1 / 1C / PRS 101 / LMG 12228) GN=PA2634 PE=1 SV=1	1	8	8
tr|Q9I1E7|Q9I1E7_PSEAE	sp|Q9I0Q0|PQSH_PSEAE			>sp|Q9I0Q0|PQSH_PSEAE 2-heptyl-3-hydroxy-4(1H)-quinolone synthase OS=Pseudomonas aeruginosa (strain ATCC 15692 / PAO1 / 1C / PRS 101 / LMG 12228) GN=pqsH PE=3 SV=1	1	1	1
tr|Q9I1E8|Q9I1E8_PSEAE	sp|Q9I1L9|DLDH1_PSEAE			>sp|Q9I1L9|DLDH1_PSEAE Dihydrolipoyl dehydrogenase OS=Pseudomonas aeruginosa (strain ATCC 15692 / PAO1 / 1C / PRS 101 / LMG 12228) GN=lpdV PE=1 SV=1	1	2	2
tr|Q9I1H3|Q9I1H3_PSEAE	sp|Q9I1M1|ODBB_PSEAE			>sp|Q9I1M1|ODBB_PSEAE 2-oxoisovalerate dehydrogenase subunit beta OS=Pseudomonas aeruginosa (strain ATCC 15692 / PAO1 / 1C / PRS 101 / LMG 12228) GN=bkdA2 PE=3 SV=1	1	1	1
tr|Q9I1Z4|Q9I1Z4_PSEAE	sp|Q9I1M2|ODBA_PSEAE			>sp|Q9I1M2|ODBA_PSEAE 2-oxoisovalerate dehydrogenase subunit alpha OS=Pseudomonas aeruginosa (strain ATCC 15692 / PAO1 / 1C / PRS 101 / LMG 12228) GN=bkdA1 PE=3 SV=1	1	1	1
tr|Q9I2A2|Q9I2A2_PSEAE	sp|Q9I2A8|ATOB_PSEAE			>sp|Q9I2A8|ATOB_PSEAE Acetyl-CoA acetyltransferase OS=Pseudomonas aeruginosa (strain ATCC 15692 / PAO1 / 1C / PRS 101 / LMG 12228) GN=atoB PE=3 SV=1	1	2	2
tr|Q9I2A6|Q9I2A6_PSEAE	sp|Q9I2V5|ACNB_PSEAE			>sp|Q9I2V5|ACNB_PSEAE Aconitate hydratase B OS=Pseudomonas aeruginosa (strain ATCC 15692 / PAO1 / 1C / PRS 101 / LMG 12228) GN=acnB PE=3 SV=1	1	13	13
tr|Q9I2H1|Q9I2H1_PSEAE	sp|Q9I3C5|HTPG_PSEAE			>sp|Q9I3C5|HTPG_PSEAE Chaperone protein HtpG OS=Pseudomonas aeruginosa (strain ATCC 15692 / PAO1 / 1C / PRS 101 / LMG 12228) GN=htpG PE=3 SV=1	1	1	1
tr|Q9I2R2|Q9I2R2_PSEAE	sp|Q9I3D1|DLDH2_PSEAE			>sp|Q9I3D1|DLDH2_PSEAE Dihydrolipoyl dehydrogenase OS=Pseudomonas aeruginosa (strain ATCC 15692 / PAO1 / 1C / PRS 101 / LMG 12228) GN=lpdG PE=3 SV=1	1	12	12
tr|Q9I2V3|Q9I2V3_PSEAE	sp|Q9I3D2|ODO2_PSEAE			>sp|Q9I3D2|ODO2_PSEAE Dihydrolipoyllysine-residue succinyltransferase component of 2-oxoglutarate dehydrogenase complex OS=Pseudomonas aeruginosa (strain ATCC 15692 / PAO1 / 1C / PRS 101 / LMG 12228) GN=sucB PE=3 SV=1	1	1	1
tr|Q9I2W9|Q9I2W9_PSEAE	sp|Q9I3F5|ACNA_PSEAE			>sp|Q9I3F5|ACNA_PSEAE Aconitate hydratase A OS=Pseudomonas aeruginosa (strain ATCC 15692 / PAO1 / 1C / PRS 101 / LMG 12228) GN=acnA PE=3 SV=1	1	15	15
tr|Q9I393|Q9I393_PSEAE	sp|Q9I4Z4|PAL_PSEAE			>sp|Q9I4Z4|PAL_PSEAE Peptidoglycan-associated lipoprotein OS=Pseudomonas aeruginosa (strain ATCC 15692 / PAO1 / 1C / PRS 101 / LMG 12228) GN=pal PE=3 SV=1	1	1	1
tr|Q9I3G0|Q9I3G0_PSEAE	sp|Q9I558|ACSA1_PSEAE			>sp|Q9I558|ACSA1_PSEAE Acetyl-coenzyme A synthetase 1 OS=Pseudomonas aeruginosa (strain ATCC 15692 / PAO1 / 1C / PRS 101 / LMG 12228) GN=acsA1 PE=3 SV=1	1	3	3
tr|Q9I3G1|Q9I3G1_PSEAE	sp|Q9I576|HPPD_PSEAE			>sp|Q9I576|HPPD_PSEAE 4-hydroxyphenylpyruvate dioxygenase OS=Pseudomonas aeruginosa (strain ATCC 15692 / PAO1 / 1C / PRS 101 / LMG 12228) GN=hpd PE=3 SV=1	1	7	7
tr|Q9I3G2|Q9I3G2_PSEAE	sp|Q9I589|CBPD_PSEAE			>sp|Q9I589|CBPD_PSEAE Chitin-binding protein CbpD OS=Pseudomonas aeruginosa (strain ATCC 15692 / PAO1 / 1C / PRS 101 / LMG 12228) GN=cbpD PE=1 SV=1	1	1	1
tr|Q9I400|Q9I400_PSEAE	sp|Q9I5G9|Y760_PSEAE			>sp|Q9I5G9|Y760_PSEAE Uncharacterized protein PA0760 OS=Pseudomonas aeruginosa (strain ATCC 15692 / PAO1 / 1C / PRS 101 / LMG 12228) GN=PA0760 PE=3 SV=1	1	1	1
tr|Q9I428|Q9I428_PSEAE	sp|Q9I5Y1|ALF_PSEAE			>sp|Q9I5Y1|ALF_PSEAE Fructose-bisphosphate aldolase OS=Pseudomonas aeruginosa (strain ATCC 15692 / PAO1 / 1C / PRS 101 / LMG 12228) GN=fba PE=3 SV=1	1	1	1
tr|Q9I4W5|Q9I4W5_PSEAE	sp|Q9I5Y4|PGK_PSEAE			>sp|Q9I5Y4|PGK_PSEAE Phosphoglycerate kinase OS=Pseudomonas aeruginosa (strain ATCC 15692 / PAO1 / 1C / PRS 101 / LMG 12228) GN=pgk PE=3 SV=1	1	1	1
tr|Q9I5F6|Q9I5F6_PSEAE	sp|Q9I636|MASZ_PSEAE			>sp|Q9I636|MASZ_PSEAE Malate synthase G OS=Pseudomonas aeruginosa (strain ATCC 15692 / PAO1 / 1C / PRS 101 / LMG 12228) GN=glcB PE=3 SV=1	1	1	1
tr|Q9I5P0|Q9I5P0_PSEAE	sp|Q9I685|SAHH_PSEAE			>sp|Q9I685|SAHH_PSEAE Adenosylhomocysteinase OS=Pseudomonas aeruginosa (strain ATCC 15692 / PAO1 / 1C / PRS 101 / LMG 12228) GN=ahcY PE=3 SV=1	1	9	9
tr|Q9I5T8|Q9I5T8_PSEAE	sp|Q9I6M4|DAVT_PSEAE			>sp|Q9I6M4|DAVT_PSEAE 5-aminovalerate aminotransferase DavT OS=Pseudomonas aeruginosa (strain ATCC 15692 / PAO1 / 1C / PRS 101 / LMG 12228) GN=davT PE=1 SV=1	1	6	6
tr|Q9I5Y8|Q9I5Y8_PSEAE	sp|Q9I6M5|DAVD_PSEAE			>sp|Q9I6M5|DAVD_PSEAE Glutarate-semialdehyde dehydrogenase DavD OS=Pseudomonas aeruginosa (strain ATCC 15692 / PAO1 / 1C / PRS 101 / LMG 12228) GN=davD PE=1 SV=1	1	3	3
tr|Q9I659|Q9I659_PSEAE	sp|Q9I747|HCP1_PSEAE			>sp|Q9I747|HCP1_PSEAE Protein hcp1 OS=Pseudomonas aeruginosa (strain ATCC 15692 / PAO1 / 1C / PRS 101 / LMG 12228) GN=hcp1 PE=1 SV=1	1	2	2
tr|Q9I671|Q9I671_PSEAE	sp|Q9I7C4|DPO3B_PSEAE			>sp|Q9I7C4|DPO3B_PSEAE DNA polymerase III subunit beta OS=Pseudomonas aeruginosa (strain ATCC 15692 / PAO1 / 1C / PRS 101 / LMG 12228) GN=dnaN PE=3 SV=1	1	2	2
tr|Q9I6A0|Q9I6A0_PSEAE	sp|Q9S508|PHZB2_PSEAE;sp|O69753|PHZB1_PSEAE			>sp|Q9S508|PHZB2_PSEAE Phenazine biosynthesis protein PhzB 2 OS=Pseudomonas aeruginosa (strain ATCC 15692 / PAO1 / 1C / PRS 101 / LMG 12228) GN=phzB2 PE=1 SV=1;>sp|O69753|PHZB1_PSEAE Phenazine biosynthesis protein PhzB 1 OS=Pseudomonas aeruginosa (strain A	2	5	5
tr|Q9I6H5|Q9I6H5_PSEAE	sp|Q9X2T1|THIO_PSEAE			>sp|Q9X2T1|THIO_PSEAE Thioredoxin OS=Pseudomonas aeruginosa (strain ATCC 15692 / PAO1 / 1C / PRS 101 / LMG 12228) GN=trxA PE=3 SV=1	1	1	1
tr|Q9I6J2|Q9I6J2_PSEAE	tr|Q9HTD1|Q9HTD1_PSEAE			>tr|Q9HTD1|Q9HTD1_PSEAE Probable transcarboxylase subunit OS=Pseudomonas aeruginosa (strain ATCC 15692 / PAO1 / 1C / PRS 101 / LMG 12228) GN=PA5435 PE=4 SV=1	1	23	23
tr|Q9I762|Q9I762_PSEAE	tr|Q9HTD9|Q9HTD9_PSEAE			>tr|Q9HTD9|Q9HTD9_PSEAE Alcohol dehydrogenase OS=Pseudomonas aeruginosa (strain ATCC 15692 / PAO1 / 1C / PRS 101 / LMG 12228) GN=adhA PE=1 SV=1	1	3	3
	tr|Q9HTP2|Q9HTP2_PSEAE			>tr|Q9HTP2|Q9HTP2_PSEAE Probable aldehyde dehydrogenase OS=Pseudomonas aeruginosa (strain ATCC 15692 / PAO1 / 1C / PRS 101 / LMG 12228) GN=PA5312 PE=3 SV=1	1	7	7
	tr|Q9HUC4|Q9HUC4_PSEAE			>tr|Q9HUC4|Q9HUC4_PSEAE Probable transcriptional regulator OS=Pseudomonas aeruginosa (strain ATCC 15692 / PAO1 / 1C / PRS 101 / LMG 12228) GN=PA5059 PE=4 SV=1	1	1	1
	tr|Q9HUD3|Q9HUD3_PSEAE			>tr|Q9HUD3|Q9HUD3_PSEAE Malic enzyme OS=Pseudomonas aeruginosa (strain ATCC 15692 / PAO1 / 1C / PRS 101 / LMG 12228) GN=PA5046 PE=4 SV=1	1	3	3
	tr|Q9HV54|Q9HV54_PSEAE			>tr|Q9HV54|Q9HV54_PSEAE Transcription termination/antitermination protein NusA OS=Pseudomonas aeruginosa (strain ATCC 15692 / PAO1 / 1C / PRS 101 / LMG 12228) GN=nusA PE=3 SV=1	1	2	2
	tr|Q9HV96|Q9HV96_PSEAE			>tr|Q9HV96|Q9HV96_PSEAE Uncharacterized protein OS=Pseudomonas aeruginosa (strain ATCC 15692 / PAO1 / 1C / PRS 101 / LMG 12228) GN=PA4701 PE=4 SV=1	1	1	1
	tr|Q9HVJ1|Q9HVJ1_PSEAE			>tr|Q9HVJ1|Q9HVJ1_PSEAE Probable ATP-binding component of ABC transporter OS=Pseudomonas aeruginosa (strain ATCC 15692 / PAO1 / 1C / PRS 101 / LMG 12228) GN=PA4595 PE=4 SV=1	1	4	4
	tr|Q9HVY4|Q9HVY4_PSEAE			>tr|Q9HVY4|Q9HVY4_PSEAE Ubiquinol-cytochrome c reductase iron-sulfur subunit OS=Pseudomonas aeruginosa (strain ATCC 15692 / PAO1 / 1C / PRS 101 / LMG 12228) GN=PA4431 PE=4 SV=1	1	1	1
	tr|Q9HVY6|Q9HVY6_PSEAE			>tr|Q9HVY6|Q9HVY6_PSEAE Probable cytochrome c1 OS=Pseudomonas aeruginosa (strain ATCC 15692 / PAO1 / 1C / PRS 101 / LMG 12228) GN=PA4429 PE=4 SV=1	1	2	2
	tr|Q9HW32|Q9HW32_PSEAE			>tr|Q9HW32|Q9HW32_PSEAE Insulin-cleaving metalloproteinase outer membrane protein OS=Pseudomonas aeruginosa (strain ATCC 15692 / PAO1 / 1C / PRS 101 / LMG 12228) GN=icmP PE=4 SV=1	1	1	1
	tr|Q9HW49|Q9HW49_PSEAE			>tr|Q9HW49|Q9HW49_PSEAE Uncharacterized protein OS=Pseudomonas aeruginosa (strain ATCC 15692 / PAO1 / 1C / PRS 101 / LMG 12228) GN=PA4352 PE=3 SV=1	1	6	6
	tr|Q9HW72|Q9HW72_PSEAE			>tr|Q9HW72|Q9HW72_PSEAE Pyruvate kinase OS=Pseudomonas aeruginosa (strain ATCC 15692 / PAO1 / 1C / PRS 101 / LMG 12228) GN=pykA PE=3 SV=1	1	1	1
	tr|Q9HWG9|Q9HWG9_PSEAE			>tr|Q9HWG9|Q9HWG9_PSEAE Flavin-containing monooxygenase OS=Pseudomonas aeruginosa (strain ATCC 15692 / PAO1 / 1C / PRS 101 / LMG 12228) GN=phzS PE=1 SV=1	1	5	5
	tr|Q9HWN0|Q9HWN0_PSEAE			>tr|Q9HWN0|Q9HWN0_PSEAE Acetoin catabolism protein AcoB OS=Pseudomonas aeruginosa (strain ATCC 15692 / PAO1 / 1C / PRS 101 / LMG 12228) GN=acoB PE=4 SV=1	1	1	1
	tr|Q9HWQ0|Q9HWQ0_PSEAE			>tr|Q9HWQ0|Q9HWQ0_PSEAE Probable iron-sulfur protein OS=Pseudomonas aeruginosa (strain ATCC 15692 / PAO1 / 1C / PRS 101 / LMG 12228) GN=PA4131 PE=4 SV=1	1	3	3
	tr|Q9HWV0|Q9HWV0_PSEAE			>tr|Q9HWV0|Q9HWV0_PSEAE Probable nonribosomal peptide synthetase OS=Pseudomonas aeruginosa (strain ATCC 15692 / PAO1 / 1C / PRS 101 / LMG 12228) GN=PA4078 PE=4 SV=1	1	5	5
	tr|Q9I2C4|Q9I2C4_PSEAE;tr|Q9HX05|Q9HX05_PSEAE			>tr|Q9I2C4|Q9I2C4_PSEAE NAD+ dependent aldehyde dehydrogenase ExaC OS=Pseudomonas aeruginosa (strain ATCC 15692 / PAO1 / 1C / PRS 101 / LMG 12228) GN=exaC PE=3 SV=1;>tr|Q9HX05|Q9HX05_PSEAE Probable aldehyde dehydrogenase OS=Pseudomonas aeruginosa (strain A	2	4	4
	tr|Q9HXJ2|Q9HXJ2_PSEAE			>tr|Q9HXJ2|Q9HXJ2_PSEAE Type 4 fimbrial biogenesis protein PilF OS=Pseudomonas aeruginosa (strain ATCC 15692 / PAO1 / 1C / PRS 101 / LMG 12228) GN=pilF PE=1 SV=1	1	1	1
	tr|Q9HXU8|Q9HXU8_PSEAE			>tr|Q9HXU8|Q9HXU8_PSEAE Lipotoxon F, LptF OS=Pseudomonas aeruginosa (strain ATCC 15692 / PAO1 / 1C / PRS 101 / LMG 12228) GN=lptF PE=3 SV=1	1	1	1
	tr|Q9HY13|Q9HY13_PSEAE			>tr|Q9HY13|Q9HY13_PSEAE Uncharacterized protein OS=Pseudomonas aeruginosa (strain ATCC 15692 / PAO1 / 1C / PRS 101 / LMG 12228) GN=PA3613 PE=4 SV=1	1	3	3
	tr|Q9HY77|Q9HY77_PSEAE			>tr|Q9HY77|Q9HY77_PSEAE Glutaredoxin OS=Pseudomonas aeruginosa (strain ATCC 15692 / PAO1 / 1C / PRS 101 / LMG 12228) GN=PA3533 PE=3 SV=1	1	1	1
	tr|Q9HY79|Q9HY79_PSEAE			>tr|Q9HY79|Q9HY79_PSEAE Ferroxidase OS=Pseudomonas aeruginosa (strain ATCC 15692 / PAO1 / 1C / PRS 101 / LMG 12228) GN=bfrB PE=1 SV=1	1	2	2
	tr|Q9HY81|Q9HY81_PSEAE			>tr|Q9HY81|Q9HY81_PSEAE Probable peroxidase OS=Pseudomonas aeruginosa (strain ATCC 15692 / PAO1 / 1C / PRS 101 / LMG 12228) GN=PA3529 PE=1 SV=1	1	8	8
	tr|Q9HYT5|Q9HYT5_PSEAE			>tr|Q9HYT5|Q9HYT5_PSEAE Uncharacterized protein OS=Pseudomonas aeruginosa (strain ATCC 15692 / PAO1 / 1C / PRS 101 / LMG 12228) GN=PA3309 PE=3 SV=1	1	5	5
	tr|Q9HYZ6|Q9HYZ6_PSEAE			>tr|Q9HYZ6|Q9HYZ6_PSEAE Site-determining protein OS=Pseudomonas aeruginosa (strain ATCC 15692 / PAO1 / 1C / PRS 101 / LMG 12228) GN=minD PE=3 SV=1	1	2	2
	tr|Q9HZK4|Q9HZK4_PSEAE			>tr|Q9HZK4|Q9HZK4_PSEAE Glyceraldehyde-3-phosphate dehydrogenase OS=Pseudomonas aeruginosa (strain ATCC 15692 / PAO1 / 1C / PRS 101 / LMG 12228) GN=PA3001 PE=3 SV=1	1	5	5
	tr|Q9I028|Q9I028_PSEAE			>tr|Q9I028|Q9I028_PSEAE Probable acyl-CoA dehydrogenase OS=Pseudomonas aeruginosa (strain ATCC 15692 / PAO1 / 1C / PRS 101 / LMG 12228) GN=PA2815 PE=4 SV=1	1	5	5
	tr|Q9I056|Q9I056_PSEAE			>tr|Q9I056|Q9I056_PSEAE Carboxypeptidase G2 OS=Pseudomonas aeruginosa (strain ATCC 15692 / PAO1 / 1C / PRS 101 / LMG 12228) GN=cpg2 PE=4 SV=1	1	1	1
	tr|Q9I0L4|Q9I0L4_PSEAE			>tr|Q9I0L4|Q9I0L4_PSEAE Isocitrate dehydrogenase OS=Pseudomonas aeruginosa (strain ATCC 15692 / PAO1 / 1C / PRS 101 / LMG 12228) GN=idh PE=4 SV=1	1	2	2
	tr|Q9I0L5|Q9I0L5_PSEAE			>tr|Q9I0L5|Q9I0L5_PSEAE Isocitrate dehydrogenase [NADP] OS=Pseudomonas aeruginosa (strain ATCC 15692 / PAO1 / 1C / PRS 101 / LMG 12228) GN=icd PE=3 SV=1	1	11	11
	tr|Q9I0T1|Q9I0T1_PSEAE			>tr|Q9I0T1|Q9I0T1_PSEAE Probable acyl-CoA thiolase OS=Pseudomonas aeruginosa (strain ATCC 15692 / PAO1 / 1C / PRS 101 / LMG 12228) GN=PA2553 PE=3 SV=1	1	3	3
	tr|Q9I148|Q9I148_PSEAE			>tr|Q9I148|Q9I148_PSEAE Uncharacterized protein OS=Pseudomonas aeruginosa (strain ATCC 15692 / PAO1 / 1C / PRS 101 / LMG 12228) GN=PA2434 PE=4 SV=1	1	1	1
	tr|Q9I1E7|Q9I1E7_PSEAE			>tr|Q9I1E7|Q9I1E7_PSEAE Alkyl hydroperoxide reductase AhpD OS=Pseudomonas aeruginosa (strain ATCC 15692 / PAO1 / 1C / PRS 101 / LMG 12228) GN=PA2331 PE=3 SV=1	1	4	4
	tr|Q9I1E8|Q9I1E8_PSEAE			>tr|Q9I1E8|Q9I1E8_PSEAE Uncharacterized protein OS=Pseudomonas aeruginosa (strain ATCC 15692 / PAO1 / 1C / PRS 101 / LMG 12228) GN=PA2330 PE=4 SV=1	1	3	3
	tr|Q9I1H3|Q9I1H3_PSEAE			>tr|Q9I1H3|Q9I1H3_PSEAE AmbE OS=Pseudomonas aeruginosa (strain ATCC 15692 / PAO1 / 1C / PRS 101 / LMG 12228) GN=ambE PE=4 SV=1	1	2	2
	tr|Q9I1H5|Q9I1H5_PSEAE			>tr|Q9I1H5|Q9I1H5_PSEAE Chitinase OS=Pseudomonas aeruginosa (strain ATCC 15692 / PAO1 / 1C / PRS 101 / LMG 12228) GN=chiC PE=3 SV=1	1	8	8
	tr|Q9I1Z4|Q9I1Z4_PSEAE			>tr|Q9I1Z4|Q9I1Z4_PSEAE Probable transcriptional regulator OS=Pseudomonas aeruginosa (strain ATCC 15692 / PAO1 / 1C / PRS 101 / LMG 12228) GN=PA2121 PE=4 SV=1	1	1	1
	tr|Q9I246|Q9I246_PSEAE			>tr|Q9I246|Q9I246_PSEAE Probable carbamoyl transferase OS=Pseudomonas aeruginosa (strain ATCC 15692 / PAO1 / 1C / PRS 101 / LMG 12228) GN=PA2069 PE=4 SV=1	1	10	10
	tr|Q9I299|Q9I299_PSEAE			>tr|Q9I299|Q9I299_PSEAE Methylcrotonyl-CoA carboxylase, alpha-subunit (Biotin-containing) OS=Pseudomonas aeruginosa (strain ATCC 15692 / PAO1 / 1C / PRS 101 / LMG 12228) GN=liuD PE=1 SV=1	1	5	5
	tr|Q9I2A2|Q9I2A2_PSEAE			>tr|Q9I2A2|Q9I2A2_PSEAE Fumarylacetoacetase OS=Pseudomonas aeruginosa (strain ATCC 15692 / PAO1 / 1C / PRS 101 / LMG 12228) GN=fahA PE=4 SV=1	1	1	1
	tr|Q9I2A6|Q9I2A6_PSEAE			>tr|Q9I2A6|Q9I2A6_PSEAE 3-hydroxybutyrate dehydrogenase OS=Pseudomonas aeruginosa (strain ATCC 15692 / PAO1 / 1C / PRS 101 / LMG 12228) GN=bdhA PE=3 SV=1	1	1	1
	tr|Q9I2H1|Q9I2H1_PSEAE			>tr|Q9I2H1|Q9I2H1_PSEAE Probable hydroxylase large subunit OS=Pseudomonas aeruginosa (strain ATCC 15692 / PAO1 / 1C / PRS 101 / LMG 12228) GN=PA1933 PE=4 SV=1	1	1	1
	tr|Q9I2R2|Q9I2R2_PSEAE			>tr|Q9I2R2|Q9I2R2_PSEAE Probable oxidoreductase OS=Pseudomonas aeruginosa (strain ATCC 15692 / PAO1 / 1C / PRS 101 / LMG 12228) GN=PA1833 PE=4 SV=1	1	2	2
	tr|Q9I2V3|Q9I2V3_PSEAE			>tr|Q9I2V3|Q9I2V3_PSEAE Uncharacterized protein OS=Pseudomonas aeruginosa (strain ATCC 15692 / PAO1 / 1C / PRS 101 / LMG 12228) GN=PA1789 PE=1 SV=1	1	2	2
	tr|Q9I2W9|Q9I2W9_PSEAE			>tr|Q9I2W9|Q9I2W9_PSEAE Phosphoenolpyruvate synthase OS=Pseudomonas aeruginosa (strain ATCC 15692 / PAO1 / 1C / PRS 101 / LMG 12228) GN=ppsA PE=3 SV=1	1	6	6
	tr|Q9I393|Q9I393_PSEAE			>tr|Q9I393|Q9I393_PSEAE Probable enoyl-CoA hydratase/isomerase OS=Pseudomonas aeruginosa (strain ATCC 15692 / PAO1 / 1C / PRS 101 / LMG 12228) GN=PA1629 PE=3 SV=1	1	1	1
	tr|Q9I3D3|Q9I3D3_PSEAE			>tr|Q9I3D3|Q9I3D3_PSEAE 2-oxoglutarate dehydrogenase (E1 subunit) OS=Pseudomonas aeruginosa (strain ATCC 15692 / PAO1 / 1C / PRS 101 / LMG 12228) GN=sucA PE=4 SV=1	1	9	9
	tr|Q9I3D4|Q9I3D4_PSEAE			>tr|Q9I3D4|Q9I3D4_PSEAE Succinate dehydrogenase (B subunit) OS=Pseudomonas aeruginosa (strain ATCC 15692 / PAO1 / 1C / PRS 101 / LMG 12228) GN=sdhB PE=4 SV=1	1	4	4
	tr|Q9I3D5|Q9I3D5_PSEAE			>tr|Q9I3D5|Q9I3D5_PSEAE Succinate dehydrogenase flavoprotein subunit OS=Pseudomonas aeruginosa (strain ATCC 15692 / PAO1 / 1C / PRS 101 / LMG 12228) GN=sdhA PE=3 SV=1	1	6	6
	tr|Q9I3G0|Q9I3G0_PSEAE			>tr|Q9I3G0|Q9I3G0_PSEAE Cytochrome c oxidase, cbb3-type, CcoN subunit OS=Pseudomonas aeruginosa (strain ATCC 15692 / PAO1 / 1C / PRS 101 / LMG 12228) GN=ccoN2 PE=3 SV=1	1	1	1
	tr|Q9I3G1|Q9I3G1_PSEAE			>tr|Q9I3G1|Q9I3G1_PSEAE Cytochrome c oxidase, cbb3-type, CcoO subunit OS=Pseudomonas aeruginosa (strain ATCC 15692 / PAO1 / 1C / PRS 101 / LMG 12228) GN=ccoO2 PE=4 SV=1	1	2	2
	tr|Q9I3G2|Q9I3G2_PSEAE			>tr|Q9I3G2|Q9I3G2_PSEAE Cbb3-type cytochrome c oxidase subunit OS=Pseudomonas aeruginosa (strain ATCC 15692 / PAO1 / 1C / PRS 101 / LMG 12228) GN=ccoP2 PE=3 SV=1	1	2	2
	tr|Q9I3G6|Q9I3G6_PSEAE			>tr|Q9I3G6|Q9I3G6_PSEAE Probable ferredoxin OS=Pseudomonas aeruginosa (strain ATCC 15692 / PAO1 / 1C / PRS 101 / LMG 12228) GN=PA1551 PE=4 SV=1	1	1	1
	tr|Q9I400|Q9I400_PSEAE			>tr|Q9I400|Q9I400_PSEAE Probable short-chain dehydrogenase OS=Pseudomonas aeruginosa (strain ATCC 15692 / PAO1 / 1C / PRS 101 / LMG 12228) GN=PA1344 PE=4 SV=1	1	1	1
	tr|Q9I428|Q9I428_PSEAE			>tr|Q9I428|Q9I428_PSEAE Probable major facilitator superfamily (MFS) transporter OS=Pseudomonas aeruginosa (strain ATCC 15692 / PAO1 / 1C / PRS 101 / LMG 12228) GN=PA1316 PE=4 SV=1	1	1	1
	tr|Q9I4W5|Q9I4W5_PSEAE			>tr|Q9I4W5|Q9I4W5_PSEAE Bacterioferritin comigratory protein OS=Pseudomonas aeruginosa (strain ATCC 15692 / PAO1 / 1C / PRS 101 / LMG 12228) GN=bcp PE=4 SV=1	1	1	1
	tr|Q9I5E3|Q9I5E3_PSEAE			>tr|Q9I5E3|Q9I5E3_PSEAE Citrate synthase OS=Pseudomonas aeruginosa (strain ATCC 15692 / PAO1 / 1C / PRS 101 / LMG 12228) GN=prpC PE=3 SV=1	1	2	2
	tr|Q9I5F6|Q9I5F6_PSEAE			>tr|Q9I5F6|Q9I5F6_PSEAE Bifunctional protein PutA OS=Pseudomonas aeruginosa (strain ATCC 15692 / PAO1 / 1C / PRS 101 / LMG 12228) GN=putA PE=3 SV=1	1	1	1
	tr|Q9I5P0|Q9I5P0_PSEAE			>tr|Q9I5P0|Q9I5P0_PSEAE Probable type II secretion system protein OS=Pseudomonas aeruginosa (strain ATCC 15692 / PAO1 / 1C / PRS 101 / LMG 12228) GN=PA0685 PE=3 SV=1	1	1	1
	tr|Q9I5T8|Q9I5T8_PSEAE			>tr|Q9I5T8|Q9I5T8_PSEAE Probable two-component sensor OS=Pseudomonas aeruginosa (strain ATCC 15692 / PAO1 / 1C / PRS 101 / LMG 12228) GN=PA0600 PE=4 SV=1	1	1	1
	tr|Q9I5U9|Q9I5U9_PSEAE			>tr|Q9I5U9|Q9I5U9_PSEAE Uncharacterized protein OS=Pseudomonas aeruginosa (strain ATCC 15692 / PAO1 / 1C / PRS 101 / LMG 12228) GN=PA0588 PE=4 SV=1	1	14	14
	tr|Q9I5Y8|Q9I5Y8_PSEAE			>tr|Q9I5Y8|Q9I5Y8_PSEAE Transketolase OS=Pseudomonas aeruginosa (strain ATCC 15692 / PAO1 / 1C / PRS 101 / LMG 12228) GN=tktA PE=1 SV=1	1	1	1
	tr|Q9I659|Q9I659_PSEAE			>tr|Q9I659|Q9I659_PSEAE Probable ClpA/B protease ATP binding subunit OS=Pseudomonas aeruginosa (strain ATCC 15692 / PAO1 / 1C / PRS 101 / LMG 12228) GN=PA0459 PE=4 SV=1	1	5	5
	tr|Q9I671|Q9I671_PSEAE			>tr|Q9I671|Q9I671_PSEAE Glutaryl-CoA dehydrogenase OS=Pseudomonas aeruginosa (strain ATCC 15692 / PAO1 / 1C / PRS 101 / LMG 12228) GN=gcdH PE=3 SV=1	1	2	2
	tr|Q9I6A0|Q9I6A0_PSEAE			>tr|Q9I6A0|Q9I6A0_PSEAE Probable cystathionine gamma-lyase OS=Pseudomonas aeruginosa (strain ATCC 15692 / PAO1 / 1C / PRS 101 / LMG 12228) GN=PA0400 PE=3 SV=1	1	2	2
	tr|Q9I6H5|Q9I6H5_PSEAE			>tr|Q9I6H5|Q9I6H5_PSEAE D-3-phosphoglycerate dehydrogenase OS=Pseudomonas aeruginosa (strain ATCC 15692 / PAO1 / 1C / PRS 101 / LMG 12228) GN=serA PE=3 SV=1	1	1	1
	tr|Q9I6J2|Q9I6J2_PSEAE			>tr|Q9I6J2|Q9I6J2_PSEAE Putrescine aminotransferase OS=Pseudomonas aeruginosa (strain ATCC 15692 / PAO1 / 1C / PRS 101 / LMG 12228) GN=spuC PE=3 SV=1	1	1	1
	tr|Q9I6Z3|Q9I6Z3_PSEAE			>tr|Q9I6Z3|Q9I6Z3_PSEAE Alkyl hydroperoxide reductase subunit C OS=Pseudomonas aeruginosa (strain ATCC 15692 / PAO1 / 1C / PRS 101 / LMG 12228) GN=ahpC PE=4 SV=1	1	7	7
	tr|Q9I762|Q9I762_PSEAE			>tr|Q9I762|Q9I762_PSEAE Uncharacterized protein OS=Pseudomonas aeruginosa (strain ATCC 15692 / PAO1 / 1C / PRS 101 / LMG 12228) GN=PA0070 PE=4 SV=1	1	1	1

## Sheet: 7-3 proteinGroups C4HSL-1
Protein IDs	Majority protein IDs	Peptide counts (all)	Peptide counts (razor+unique)	Peptide counts (unique)	Fasta headers	Number of proteins	Peptides	Razor + unique peptides	Unique peptides	Sequence coverage [%]	Unique + razor sequence coverage [%]	Unique sequence coverage [%]	Mol. weight [kDa]	Sequence length	Sequence lengths	Q-value	Score	Intensity	MS/MS Count	Only identified by site	Reverse	Potential contaminant	id	Peptide IDs	Peptide is razor	Mod. peptide IDs	Evidence IDs	MS/MS IDs	Best MS/MS	Oxidation (M) site IDs	Oxidation (M) site positions
CON__P00761	CON__P00761	4	4	4	>P00761 SWISS-PROT:P00761|TRYP_PIG Trypsin - Sus scrofa (Pig).	1	4	4	4	25.1	25.1	25.1	24.409	231	231	0	65.405	2351800000	114			+	0	189;239;274;397	True;True;True;True	205;206;258;294;428	322;323;324;325;326;327;328;418;419;420;421;479;480;735;736	649;650;651;652;653;654;655;656;657;658;659;660;661;662;663;664;665;666;667;668;669;670;671;672;673;674;675;676;887;888;889;890;891;892;893;894;895;896;897;898;899;900;901;902;903;904;905;906;907;908;909;910;911;912;913;914;915;916;917;918;919;920;921;1029;1030;1031;1032;1033;1034;1035;1036;1037;1038;1039;1040;1677;1678;1679;1680;1681;1682;1683;1684;1685;1686;1687;1688;1689;1690;1691;1692;1693;16…	656;918;1031;1686	0	94
CON__Streptavidin	CON__Streptavidin	7	7	7	>Streptavidin (S.avidinii)	1	7	7	7	49.4	49.4	49.4	16.622	160	160	0	115.07	2159100000	232			+	1	202;203;302;358;455;456;470	True;True;True;True;True;True;True	221;222;329;388;490;491;505	348;349;350;351;352;353;354;355;356;357;358;359;540;541;542;543;544;545;546;547;548;549;550;551;552;652;653;654;655;656;657;658;830;831;832;833;834;835;836;837;857	712;713;714;715;716;717;718;719;720;721;722;723;724;725;726;727;728;729;730;731;732;733;734;735;736;737;738;739;740;741;742;743;744;745;746;747;748;749;750;751;752;753;754;755;756;757;758;759;760;761;762;763;764;765;766;767;768;769;770;771;772;773;774;775;776;777;778;779;780;1170;1171;1172;1173;1174;1175;1176;1177;1178;1179;1180;1181;1182;1183;1184;1185;1186;1187;1188;1189;1190;1191;1192;1193;119…	741;770;1192;1453;1894;1940;1980
REV__tr|Q9HXW2|Q9HXW2_PSEAE	REV__tr|Q9HXW2|Q9HXW2_PSEAE	1	1	1	>tr|Q9HXW2|Q9HXW2_PSEAE Probable transcriptional regulator OS=Pseudomonas aeruginosa (strain ATCC 15692 / PAO1 / 1C / PRS 101 / LMG 12228) GN=PA3678 PE=4 SV=1	1	1	1	1	0	0	0	23.15	212	212	0.009434	5.6682	39470000	9		+		2	221	TRUE	240	392	840;841;842;843;844;845;846;847;848	841
sp|O52759|RS4_PSEAE	sp|O52759|RS4_PSEAE	2	2	2	>sp|O52759|RS4_PSEAE 30S ribosomal protein S4 OS=Pseudomonas aeruginosa (strain ATCC 15692 / PAO1 / 1C / PRS 101 / LMG 12228) GN=rpsD PE=3 SV=2	1	2	2	2	12.6	12.6	12.6	23.277	206	206	0	18.321	7610300	4				3	26;272	True;True	29;292	54;476;477	170;1025;1026;1027	170;1025
sp|O52760|RPOA_PSEAE	sp|O52760|RPOA_PSEAE	2	2	2	>sp|O52760|RPOA_PSEAE DNA-directed RNA polymerase subunit alpha OS=Pseudomonas aeruginosa (strain ATCC 15692 / PAO1 / 1C / PRS 101 / LMG 12228) GN=rpoA PE=3 SV=2	1	2	2	2	6.3	6.3	6.3	36.649	333	333	0	11.084	3312700	3				4	271;437	True;True	291;471	474;475;805	1023;1024;1858	1024;1858
sp|O52762|CATA_PSEAE	sp|O52762|CATA_PSEAE	8	8	8	>sp|O52762|CATA_PSEAE Catalase OS=Pseudomonas aeruginosa (strain ATCC 15692 / PAO1 / 1C / PRS 101 / LMG 12228) GN=katA PE=1 SV=1	1	8	8	8	18.7	18.7	18.7	55.588	482	482	0	75.646	25733000	20				5	78;151;153;234;279;301;382;466	True;True;True;True;True;True;True;True	85;163;164;166;253;299;328;413;501	144;253;254;255;258;259;410;411;486;487;488;539;711;852	328;510;511;512;513;514;515;523;524;525;875;876;877;878;1048;1049;1050;1051;1169;1632;1969	328;511;525;875;1050;1169;1632;1969	1	30
sp|O54439|ACP1_PSEAE	sp|O54439|ACP1_PSEAE	2	2	2	>sp|O54439|ACP1_PSEAE Acyl carrier protein 1 OS=Pseudomonas aeruginosa (strain ATCC 15692 / PAO1 / 1C / PRS 101 / LMG 12228) GN=acpP1 PE=3 SV=4	1	2	2	2	32.1	32.1	32.1	8.7406	78	78	0	15.133	1414800	2				6	210;211	True;True	229;230	369;370	793;794	793;794
sp|O68822|AMPA_PSEAE	sp|O68822|AMPA_PSEAE	9	9	9	>sp|O68822|AMPA_PSEAE Cytosol aminopeptidase OS=Pseudomonas aeruginosa (strain ATCC 15692 / PAO1 / 1C / PRS 101 / LMG 12228) GN=pepA PE=3 SV=1	1	9	9	9	22.6	22.6	22.6	52.331	495	495	0	79.614	47394000	27				7	55;56;91;133;146;230;253;259;407	True;True;True;True;True;True;True;True;True	59;60;99;145;158;249;272;278;439	106;107;108;164;226;247;248;405;406;445;446;454;455;456;457;750;751	259;260;261;262;263;380;464;503;504;505;867;868;869;977;978;979;993;994;995;996;997;998;999;1000;1740;1741;1742	260;263;380;464;505;868;978;997;1742	2	182
sp|P04739|FMPO_PSEAE	sp|P04739|FMPO_PSEAE	3	3	3	>sp|P04739|FMPO_PSEAE Fimbrial protein OS=Pseudomonas aeruginosa (strain ATCC 15692 / PAO1 / 1C / PRS 101 / LMG 12228) GN=pilA PE=1 SV=1	1	3	3	3	29.5	29.5	29.5	15.512	149	149	0	27.024	12759000	8				8	182;339;388	True;True;True	198;368;419	312;622;623;721;722	636;1374;1375;1376;1377;1378;1650;1651	636;1374;1651
sp|P05384|DBHB_PSEAE	sp|P05384|DBHB_PSEAE	2	2	2	>sp|P05384|DBHB_PSEAE DNA-binding protein HU-beta OS=Pseudomonas aeruginosa (strain ATCC 15692 / PAO1 / 1C / PRS 101 / LMG 12228) GN=hupB PE=1 SV=3	1	2	2	2	32.2	32.2	32.2	9.0865	90	90	0	18.06	7815900	5				9	28;340	True;True	31;369	57;58;624	174;175;176;177;1379	176;1379
sp|P08308|OTCC_PSEAE	sp|P08308|OTCC_PSEAE	8	8	8	>sp|P08308|OTCC_PSEAE Ornithine carbamoyltransferase, catabolic OS=Pseudomonas aeruginosa (strain ATCC 15692 / PAO1 / 1C / PRS 101 / LMG 12228) GN=arcB PE=1 SV=3	1	8	8	8	28.3	28.3	28.3	38.108	336	336	0	51.874	56741000	27				10	118;190;278;300;309;313;323;463	True;True;True;True;True;True;True;True	128;129;207;208;298;326;327;336;340;341;351;498	202;203;204;205;329;330;484;485;536;537;538;564;565;572;573;574;575;591;848;849	430;431;432;433;434;435;436;437;677;678;1046;1047;1165;1166;1167;1168;1257;1258;1267;1268;1269;1270;1305;1962;1963;1964;1965	431;678;1046;1168;1257;1269;1305;1965	3;4;5;6	101;146;169;261
sp|P09591|EFTU_PSEAE	sp|P09591|EFTU_PSEAE	14	14	14	>sp|P09591|EFTU_PSEAE Elongation factor Tu OS=Pseudomonas aeruginosa (strain ATCC 15692 / PAO1 / 1C / PRS 101 / LMG 12228) GN=tufA PE=1 SV=2	1	14	14	14	44.1	44.1	44.1	43.369	397	397	0	147.94	453980000	175				11	16;23;68;74;75;120;145;165;280;299;329;386;390;430	True;True;True;True;True;True;True;True;True;True;True;True;True;True	17;25;26;73;79;80;81;82;131;157;179;300;323;324;325;357;417;421;462	31;32;43;44;45;46;47;48;49;50;124;125;135;136;137;138;139;140;207;208;243;244;245;246;278;279;280;281;489;490;491;524;525;526;527;528;529;530;531;532;533;534;535;600;601;718;719;725;787;788	92;93;94;95;96;97;98;99;100;101;102;103;104;105;106;124;125;126;127;128;129;130;131;132;133;134;135;136;137;138;139;140;141;142;143;144;145;146;147;148;149;150;151;152;153;154;155;156;157;158;159;160;161;162;163;164;165;166;290;291;309;310;311;312;313;314;315;316;317;318;319;320;321;322;439;440;489;490;491;492;493;494;495;496;497;498;499;500;501;502;567;568;569;570;571;572;573;574;575;576;577;578…	102;125;291;314;320;440;494;576;1063;1163;1318;1646;1657;1810	7;8;9;10	177;216;362;372
sp|P11221|OPRI_PSEAE	sp|P11221|OPRI_PSEAE	1	1	1	>sp|P11221|OPRI_PSEAE Major outer membrane lipoprotein OS=Pseudomonas aeruginosa (strain ATCC 15692 / PAO1 / 1C / PRS 101 / LMG 12228) GN=oprI PE=3 SV=1	1	1	1	1	12	12	12	8.8348	83	83	0	7.3746	574550	3				12	277	TRUE	297	483	1043;1044;1045	1045
sp|P13794|PORF_PSEAE	sp|P13794|PORF_PSEAE	6	6	6	>sp|P13794|PORF_PSEAE Outer membrane porin F OS=Pseudomonas aeruginosa (strain ATCC 15692 / PAO1 / 1C / PRS 101 / LMG 12228) GN=oprF PE=1 SV=1	1	6	6	6	22.6	22.6	22.6	37.639	350	350	0	62.219	104280000	46				13	82;331;333;400;423;472	True;True;True;True;True;True	90;359;361;431;455;507	151;152;604;605;607;608;739;740;775;776;777;859;860	341;342;343;344;345;346;347;348;349;350;351;352;353;354;355;1328;1329;1330;1331;1332;1333;1334;1335;1338;1339;1340;1718;1719;1720;1721;1722;1723;1724;1725;1726;1727;1781;1782;1783;1784;1785;1786;1787;1788;1789;1986;1987	348;1329;1339;1724;1786;1987
sp|P13981|ARCA_PSEAE	sp|P13981|ARCA_PSEAE	16	16	16	>sp|P13981|ARCA_PSEAE Arginine deiminase OS=Pseudomonas aeruginosa (strain ATCC 15692 / PAO1 / 1C / PRS 101 / LMG 12228) GN=arcA PE=1 SV=2	1	16	16	16	47.6	47.6	47.6	46.435	418	418	0	154.91	169710000	94				14	72;77;102;116;143;208;215;216;318;321;324;363;371;372;412;444	True;True;True;True;True;True;True;True;True;True;True;True;True;True;True;True	77;84;110;111;126;155;227;234;235;346;349;352;394;402;403;444;478	131;132;142;143;178;179;180;181;198;199;240;241;365;366;376;377;378;379;581;582;585;586;592;671;672;689;690;691;692;693;694;695;759;814	301;302;303;304;324;325;326;327;395;396;397;398;399;400;401;422;423;424;425;426;427;483;484;485;486;787;788;800;801;802;803;804;805;1276;1277;1278;1279;1283;1284;1285;1286;1287;1288;1289;1306;1495;1496;1497;1498;1499;1573;1574;1575;1576;1577;1578;1579;1580;1581;1582;1583;1584;1585;1586;1587;1588;1589;1590;1591;1592;1593;1594;1595;1596;1597;1598;1599;1600;1601;1602;1603;1604;1605;1606;1607;1608;16…	303;326;398;425;485;787;801;802;1278;1283;1306;1498;1573;1592;1759;1869	11	316
sp|P13982|ARCC_PSEAE	sp|P13982|ARCC_PSEAE	2	2	2	>sp|P13982|ARCC_PSEAE Carbamate kinase OS=Pseudomonas aeruginosa (strain ATCC 15692 / PAO1 / 1C / PRS 101 / LMG 12228) GN=arcC PE=3 SV=1	1	2	2	2	9.4	9.4	9.4	33.08	310	310	0	16.742	934330	3				15	21;65	True;True	23;70	40;121	121;285;286	121;286
sp|P14165|CISY_PSEAE	sp|P14165|CISY_PSEAE	1	1	1	>sp|P14165|CISY_PSEAE Citrate synthase OS=Pseudomonas aeruginosa (strain ATCC 15692 / PAO1 / 1C / PRS 101 / LMG 12228) GN=gltA PE=3 SV=2	1	1	1	1	2.3	2.3	2.3	47.694	428	428	0.0087719	5.5852	352580	1				16	164	TRUE	178	277	566	566
sp|P30718|CH60_PSEAE	sp|P30718|CH60_PSEAE	13	13	13	>sp|P30718|CH60_PSEAE 60 kDa chaperonin OS=Pseudomonas aeruginosa (strain ATCC 15692 / PAO1 / 1C / PRS 101 / LMG 12228) GN=groL PE=1 SV=3	1	13	13	13	38	38	38	57.085	547	547	0	122.37	109490000	58				17	2;19;34;35;41;109;110;121;163;296;325;341;404	True;True;True;True;True;True;True;True;True;True;True;True;True	2;20;21;37;38;45;118;119;120;132;177;319;320;353;370;435	4;5;36;37;38;66;67;68;69;84;85;86;87;189;190;191;192;209;276;517;518;519;520;593;594;625;626;744;745	23;24;25;26;27;28;29;30;31;32;110;111;112;113;114;115;116;117;118;190;191;192;193;194;215;216;217;218;219;220;221;222;223;224;225;226;227;413;414;415;416;441;565;1120;1121;1122;1123;1124;1125;1307;1308;1309;1380;1381;1731;1732;1733;1734	29;116;191;194;215;415;416;441;565;1123;1309;1381;1731	12;13;14	16;233;267
sp|P37798|ACCC_PSEAE	sp|P37798|ACCC_PSEAE	3	3	3	>sp|P37798|ACCC_PSEAE Biotin carboxylase OS=Pseudomonas aeruginosa (strain ATCC 15692 / PAO1 / 1C / PRS 101 / LMG 12228) GN=accC PE=1 SV=1	1	3	3	3	8	8	8	48.887	449	449	0	23.064	6966100	5				18	113;344;409	True;True;True	123;373;441	195;629;630;754;755	419;1386;1387;1749;1750;1751	419;1387;1749
sp|P37799|BCCP_PSEAE	sp|P37799|BCCP_PSEAE	8	8	8	>sp|P37799|BCCP_PSEAE Biotin carboxyl carrier protein of acetyl-CoA carboxylase OS=Pseudomonas aeruginosa (strain ATCC 15692 / PAO1 / 1C / PRS 101 / LMG 12228) GN=accB PE=3 SV=1	1	8	8	8	62.2	62.2	62.2	16.455	156	156	0	138.06	980670000	171				19	1;217;218;249;250;264;354;364	True;True;True;True;True;True;True;True	1;236;237;268;269;284;383;384;395	1;2;3;380;381;382;383;384;385;386;387;435;436;437;438;439;440;441;442;466;644;645;646;647;673;674;675;676;677;678	2;3;4;5;6;7;8;9;10;11;12;13;14;15;16;17;18;19;20;21;22;806;807;808;809;810;811;812;813;814;815;816;817;818;819;820;821;822;823;824;825;826;827;828;829;830;831;832;833;834;945;946;947;948;949;950;951;952;953;954;955;956;957;958;959;960;961;962;963;964;965;966;967;968;969;970;971;972;973;1009;1010;1011;1404;1405;1406;1407;1408;1409;1410;1411;1412;1413;1414;1415;1416;1417;1418;1419;1420;1421;1422;14…	3;810;826;948;965;1010;1417;1543	15	87
sp|P43336|PHHC_PSEAE	sp|P43336|PHHC_PSEAE	4	4	4	>sp|P43336|PHHC_PSEAE Aromatic-amino-acid aminotransferase OS=Pseudomonas aeruginosa (strain ATCC 15692 / PAO1 / 1C / PRS 101 / LMG 12228) GN=phhC PE=3 SV=2	1	4	4	4	14	14	14	43.273	399	399	0	32.197	11219000	9				20	64;180;222;428	True;True;True;True	69;196;241;460	120;308;309;393;784;785	284;631;632;633;849;850;851;1801;1802	284;631;850;1801
sp|P53593|SUCC_PSEAE	sp|P53593|SUCC_PSEAE	12	12	12	>sp|P53593|SUCC_PSEAE Succinyl-CoA ligase [ADP-forming] subunit beta OS=Pseudomonas aeruginosa (strain ATCC 15692 / PAO1 / 1C / PRS 101 / LMG 12228) GN=sucC PE=3 SV=2	1	12	12	12	38.1	38.1	38.1	41.542	388	388	0	122.22	63834000	36				21	10;52;58;108;178;185;199;200;235;311;328;414	True;True;True;True;True;True;True;True;True;True;True;True	11;56;62;117;194;201;218;219;254;338;356;446	21;22;102;110;188;305;306;315;316;344;345;346;412;413;568;569;598;599;762;763;764	75;76;77;78;251;252;253;265;412;628;629;639;640;706;707;708;709;710;879;880;881;882;1261;1262;1263;1264;1314;1315;1316;1317;1763;1764;1765;1766;1767;1768	76;251;265;412;629;640;707;709;880;1263;1316;1766
sp|P53641|SODF_PSEAE	sp|P53641|SODF_PSEAE	2	2	2	>sp|P53641|SODF_PSEAE Superoxide dismutase [Fe] OS=Pseudomonas aeruginosa (strain ATCC 15692 / PAO1 / 1C / PRS 101 / LMG 12228) GN=sodB PE=3 SV=3	1	2	2	2	13.5	13.5	13.5	21.351	193	193	0	17.312	18573000	8				22	12;384	True;True	13;415	24;25;714;715	81;82;83;84;1636;1637;1638;1639	82;1638
sp|Q51422|SYDND_PSEAE	sp|Q51422|SYDND_PSEAE	1	1	1	>sp|Q51422|SYDND_PSEAE Aspartate--tRNA(Asp/Asn) ligase OS=Pseudomonas aeruginosa (strain ATCC 15692 / PAO1 / 1C / PRS 101 / LMG 12228) GN=aspS PE=1 SV=2	1	1	1	1	2.2	2.2	2.2	66.207	591	591	0	8.7243	584410	2				23	204	TRUE	223	360	781;782	781
sp|Q51561|RPOB_PSEAE	sp|Q51561|RPOB_PSEAE	5	5	5	>sp|Q51561|RPOB_PSEAE DNA-directed RNA polymerase subunit beta OS=Pseudomonas aeruginosa (strain ATCC 15692 / PAO1 / 1C / PRS 101 / LMG 12228) GN=rpoB PE=3 SV=2	1	5	5	5	6.6	6.6	6.6	150.84	1357	1357	0	38.11	7433500	14				24	20;31;297;330;357	True;True;True;True;True	22;34;321;358;387	39;62;63;521;602;603;651	119;120;182;183;184;185;186;1126;1323;1324;1325;1326;1327;1445	120;182;1126;1326;1445
sp|Q51567|SUCD_PSEAE	sp|Q51567|SUCD_PSEAE	4	4	4	>sp|Q51567|SUCD_PSEAE Succinyl-CoA ligase [ADP-forming] subunit alpha OS=Pseudomonas aeruginosa (strain ATCC 15692 / PAO1 / 1C / PRS 101 / LMG 12228) GN=sucD PE=3 SV=2	1	4	4	4	17.6	17.6	17.6	30.266	295	295	0	32.838	24734000	12				25	27;42;117;347	True;True;True;True	30;46;127;376	55;56;88;89;90;91;200;201;635;636	171;172;173;228;229;230;231;232;428;429;1392;1393	172;228;428;1392
sp|Q59636|NDK_PSEAE	sp|Q59636|NDK_PSEAE	1	1	1	>sp|Q59636|NDK_PSEAE Nucleoside diphosphate kinase OS=Pseudomonas aeruginosa (strain ATCC 15692 / PAO1 / 1C / PRS 101 / LMG 12228) GN=ndk PE=3 SV=2	1	1	1	1	6.3	6.3	6.3	15.592	143	143	0	5.9183	0	1				26	319	TRUE	347	583	1280	1280
sp|Q59637|ODP1_PSEAE	sp|Q59637|ODP1_PSEAE	8	8	8	>sp|Q59637|ODP1_PSEAE Pyruvate dehydrogenase E1 component OS=Pseudomonas aeruginosa (strain ATCC 15692 / PAO1 / 1C / PRS 101 / LMG 12228) GN=aceE PE=3 SV=2	1	8	8	8	9.5	9.5	9.5	99.563	882	882	0	56.481	29944000	17				27	81;101;131;187;205;213;348;353	True;True;True;True;True;True;True;True	89;109;143;203;224;232;377;382	150;176;177;223;224;318;319;361;362;373;374;637;638;643	340;393;394;460;461;462;642;643;644;783;784;797;798;1394;1395;1396;1403	340;394;461;644;784;798;1395;1403
sp|Q59638|ODP2_PSEAE	sp|Q59638|ODP2_PSEAE	3	3	3	>sp|Q59638|ODP2_PSEAE Dihydrolipoyllysine-residue acetyltransferase component of pyruvate dehydrogenase complex OS=Pseudomonas aeruginosa (strain ATCC 15692 / PAO1 / 1C / PRS 101 / LMG 12228) GN=aceF PE=2 SV=2	1	3	3	3	7.1	7.1	7.1	56.708	547	547	0	22.565	1549600	3				28	97;105;352	True;True;True	105;114;381	171;185;642	388;407;1402	388;407;1402
sp|Q9HT16|ATPF_PSEAE	sp|Q9HT16|ATPF_PSEAE	1	1	1	>sp|Q9HT16|ATPF_PSEAE ATP synthase subunit b OS=Pseudomonas aeruginosa (strain ATCC 15692 / PAO1 / 1C / PRS 101 / LMG 12228) GN=atpF PE=3 SV=1	1	1	1	1	7.1	7.1	7.1	16.956	156	156	0	6.54	234390	1				29	45	TRUE	49	94	235	235
sp|Q9HT18|ATPA_PSEAE	sp|Q9HT18|ATPA_PSEAE	11	11	11	>sp|Q9HT18|ATPA_PSEAE ATP synthase subunit alpha OS=Pseudomonas aeruginosa (strain ATCC 15692 / PAO1 / 1C / PRS 101 / LMG 12228) GN=atpA PE=3 SV=1	1	11	11	11	24.7	24.7	24.7	55.393	514	514	0	99.162	73479000	35				30	94;136;138;191;305;359;360;365;408;440;441	True;True;True;True;True;True;True;True;True;True;True	102;148;150;209;332;389;390;391;396;440;474;475	167;168;230;233;234;331;332;557;659;660;661;662;663;664;665;666;667;679;680;752;753;809;810;811	383;384;385;468;472;473;679;680;681;682;1246;1247;1480;1481;1482;1483;1484;1485;1486;1487;1488;1489;1490;1556;1557;1743;1744;1745;1746;1747;1748;1862;1863;1864;1865	385;468;473;682;1246;1481;1485;1557;1746;1862;1865	16	157
sp|Q9HT19|ATPG_PSEAE	sp|Q9HT19|ATPG_PSEAE	1	1	1	>sp|Q9HT19|ATPG_PSEAE ATP synthase gamma chain OS=Pseudomonas aeruginosa (strain ATCC 15692 / PAO1 / 1C / PRS 101 / LMG 12228) GN=atpG PE=3 SV=1	1	1	1	1	6.6	6.6	6.6	31.553	286	286	0	6.3671	535100	1				31	304	TRUE	331	556	1245	1245
sp|Q9HT20|ATPB_PSEAE	sp|Q9HT20|ATPB_PSEAE	7	7	7	>sp|Q9HT20|ATPB_PSEAE ATP synthase subunit beta OS=Pseudomonas aeruginosa (strain ATCC 15692 / PAO1 / 1C / PRS 101 / LMG 12228) GN=atpD PE=3 SV=1	1	7	7	7	21.8	21.8	21.8	49.499	458	458	0	49.27	11549000	10				32	66;90;149;326;396;406;469	True;True;True;True;True;True;True	71;98;161;354;427;438;504	122;163;251;595;596;733;734;748;749;856	287;379;508;1310;1311;1312;1675;1676;1738;1739;1975	287;379;508;1311;1676;1739;1975
sp|Q9HTZ7|PCKA_PSEAE	sp|Q9HTZ7|PCKA_PSEAE	1	1	1	>sp|Q9HTZ7|PCKA_PSEAE Phosphoenolpyruvate carboxykinase [ATP] OS=Pseudomonas aeruginosa (strain ATCC 15692 / PAO1 / 1C / PRS 101 / LMG 12228) GN=pckA PE=3 SV=1	1	1	1	1	2.5	2.5	2.5	55.731	513	513	0	5.977	636090	2				33	59	TRUE	63	111	266;267	267
sp|Q9HU21|RMLC_PSEAE	sp|Q9HU21|RMLC_PSEAE	1	1	1	>sp|Q9HU21|RMLC_PSEAE dTDP-4-dehydrorhamnose 3,5-epimerase OS=Pseudomonas aeruginosa (strain ATCC 15692 / PAO1 / 1C / PRS 101 / LMG 12228) GN=rmlC PE=1 SV=1	1	1	1	1	6.6	6.6	6.6	20.766	181	181	0	7.0186	544870	2				34	225	TRUE	244	397	858;859	859
sp|Q9HU65|GLNA_PSEAE	sp|Q9HU65|GLNA_PSEAE	4	4	4	>sp|Q9HU65|GLNA_PSEAE Glutamine synthetase OS=Pseudomonas aeruginosa (strain ATCC 15692 / PAO1 / 1C / PRS 101 / LMG 12228) GN=glnA PE=1 SV=1	1	4	4	4	17.3	17.3	17.3	51.944	469	469	0	28.625	6322300	9				35	33;128;286;316	True;True;True;True	36;140;306;307;344	65;220;498;499;500;579	188;189;454;455;1075;1076;1077;1078;1274	188;454;1075;1274	17;18	332;377
sp|Q9HU83|HUTU_PSEAE	sp|Q9HU83|HUTU_PSEAE	2	2	2	>sp|Q9HU83|HUTU_PSEAE Urocanate hydratase OS=Pseudomonas aeruginosa (strain ATCC 15692 / PAO1 / 1C / PRS 101 / LMG 12228) GN=hutU PE=1 SV=1	1	2	2	2	5.5	5.5	5.5	61.193	559	559	0	15.129	607560	2				36	25;420	True;True	28;452	53;772	169;1777	169;1777
sp|Q9HUC8|SYR_PSEAE	sp|Q9HUC8|SYR_PSEAE	1	1	1	>sp|Q9HUC8|SYR_PSEAE Arginine--tRNA ligase OS=Pseudomonas aeruginosa (strain ATCC 15692 / PAO1 / 1C / PRS 101 / LMG 12228) GN=argS PE=3 SV=1	1	1	1	1	2	2	2	65.199	587	587	0	8.3081	434850	1				37	377	TRUE	408	703	1620	1620
sp|Q9HUM6|PURA_PSEAE	sp|Q9HUM6|PURA_PSEAE	1	1	1	>sp|Q9HUM6|PURA_PSEAE Adenylosuccinate synthetase OS=Pseudomonas aeruginosa (strain ATCC 15692 / PAO1 / 1C / PRS 101 / LMG 12228) GN=purA PE=3 SV=1	1	1	1	1	2.3	2.3	2.3	46.814	430	430	0	6.2527	1836600	2				38	376	TRUE	407	701;702	1618;1619	1619
sp|Q9HV43|DNAK_PSEAE	sp|Q9HV43|DNAK_PSEAE	4	4	4	>sp|Q9HV43|DNAK_PSEAE Chaperone protein DnaK OS=Pseudomonas aeruginosa (strain ATCC 15692 / PAO1 / 1C / PRS 101 / LMG 12228) GN=dnaK PE=3 SV=1	1	4	4	4	10.4	10.4	10.4	68.402	637	637	0	29.256	3780000	5				39	51;186;291;387	True;True;True;True	55;202;312;418	101;317;506;720	250;641;1091;1648;1649	250;641;1091;1649
sp|Q9HV59|PNP_PSEAE	sp|Q9HV59|PNP_PSEAE	3	3	3	>sp|Q9HV59|PNP_PSEAE Polyribonucleotide nucleotidyltransferase OS=Pseudomonas aeruginosa (strain ATCC 15692 / PAO1 / 1C / PRS 101 / LMG 12228) GN=pnp PE=3 SV=1	1	3	3	3	5.3	5.3	5.3	75.452	701	701	0	18.395	3557200	3				40	43;266;421	True;True;True	47;286;453	92;468;773	233;1014;1778	233;1014;1778
sp|Q9HVA2|ILVC_PSEAE	sp|Q9HVA2|ILVC_PSEAE	1	1	1	>sp|Q9HVA2|ILVC_PSEAE Ketol-acid reductoisomerase OS=Pseudomonas aeruginosa (strain ATCC 15692 / PAO1 / 1C / PRS 101 / LMG 12228) GN=ilvC PE=1 SV=1	1	1	1	1	5.6	5.6	5.6	36.424	338	338	0	9.154	693950	2				41	141	TRUE	153	237	477;478	478
sp|Q9HWC9|RPOC_PSEAE	sp|Q9HWC9|RPOC_PSEAE	11	11	11	>sp|Q9HWC9|RPOC_PSEAE DNA-directed RNA polymerase subunit beta OS=Pseudomonas aeruginosa (strain ATCC 15692 / PAO1 / 1C / PRS 101 / LMG 12228) GN=rpoC PE=3 SV=1	1	11	11	11	11.4	11.4	11.4	154.38	1399	1399	0	87.583	12504000	23				42	73;98;99;106;179;245;284;315;343;394;461	True;True;True;True;True;True;True;True;True;True;True	78;106;107;115;195;264;304;343;372;425;496	133;134;172;173;174;186;307;428;429;496;577;578;628;729;730;845	305;306;307;308;389;390;391;408;409;410;630;936;937;938;1073;1272;1273;1385;1662;1663;1664;1957;1958	305;389;391;408;630;938;1073;1273;1385;1662;1957
sp|Q9HWD2|EFG1_PSEAE;sp|Q9I244|EFG2_PSEAE	sp|Q9HWD2|EFG1_PSEAE	12;4	12;4	12;4	>sp|Q9HWD2|EFG1_PSEAE Elongation factor G 1 OS=Pseudomonas aeruginosa (strain ATCC 15692 / PAO1 / 1C / PRS 101 / LMG 12228) GN=fusA PE=1 SV=1	2	12	12	12	25.4	25.4	25.4	77.784	706	706;702	0	120.16	47529000	36				43	9;15;115;159;160;171;229;244;292;308;447;453	True;True;True;True;True;True;True;True;True;True;True;True	9;10;16;125;173;174;185;248;263;313;314;335;481;488	18;19;20;29;30;197;270;271;272;289;290;403;404;427;507;508;509;562;563;818;819;827;828	70;71;72;73;74;90;91;421;555;556;557;558;559;560;589;590;591;592;865;866;934;935;1092;1093;1094;1095;1254;1255;1256;1876;1877;1878;1879;1880;1888;1889;1890;1891	73;91;421;555;558;589;866;934;1093;1255;1878;1890	19;20	409;666
sp|Q9HWD5|RL3_PSEAE	sp|Q9HWD5|RL3_PSEAE	1	1	1	>sp|Q9HWD5|RL3_PSEAE 50S ribosomal protein L3 OS=Pseudomonas aeruginosa (strain ATCC 15692 / PAO1 / 1C / PRS 101 / LMG 12228) GN=rplC PE=3 SV=1	1	1	1	1	4.7	4.7	4.7	22.591	211	211	0	7.0526	585010	1				44	439	TRUE	473	808	1861	1861
sp|Q9HWD8|RL2_PSEAE	sp|Q9HWD8|RL2_PSEAE	2	2	2	>sp|Q9HWD8|RL2_PSEAE 50S ribosomal protein L2 OS=Pseudomonas aeruginosa (strain ATCC 15692 / PAO1 / 1C / PRS 101 / LMG 12228) GN=rplB PE=3 SV=1	1	2	2	2	11.4	11.4	11.4	29.579	273	273	0	15.054	8287600	5				45	53;157	True;True	57;171	103;104;267;268	254;255;256;552;553	256;553
sp|Q9HWE2|RL16_PSEAE	sp|Q9HWE2|RL16_PSEAE	2	2	2	>sp|Q9HWE2|RL16_PSEAE 50S ribosomal protein L16 OS=Pseudomonas aeruginosa (strain ATCC 15692 / PAO1 / 1C / PRS 101 / LMG 12228) GN=rplP PE=3 SV=1	1	2	2	2	16.8	16.8	16.8	15.401	137	137	0	15.478	4569000	4				46	422;436	True;True	454;470	774;803;804	1779;1780;1856;1857	1779;1856
sp|Q9HZ71|RS1_PSEAE	sp|Q9HZ71|RS1_PSEAE	4	4	4	>sp|Q9HZ71|RS1_PSEAE 30S ribosomal protein S1 OS=Pseudomonas aeruginosa (strain ATCC 15692 / PAO1 / 1C / PRS 101 / LMG 12228) GN=rpsA PE=3 SV=1	1	4	4	4	10.6	10.6	10.6	61.869	559	559	0	40.373	9949000	9				47	13;89;134;327	True;True;True;True	14;97;146;355	26;27;162;227;228;597	85;86;87;88;377;378;465;466;1313	86;377;466;1313
sp|Q9HZ76|WBPE_PSEAE	sp|Q9HZ76|WBPE_PSEAE	1	1	1	>sp|Q9HZ76|WBPE_PSEAE UDP-2-acetamido-2-deoxy-3-oxo-D-glucuronate aminotransferase OS=Pseudomonas aeruginosa (strain ATCC 15692 / PAO1 / 1C / PRS 101 / LMG 12228) GN=wbpE PE=1 SV=1	1	1	1	1	5	5	5	38.924	359	359	0	6.1795	451530	1				48	457	TRUE	492	838	1943	1943
sp|Q9HZA7|ACCD_PSEAE	sp|Q9HZA7|ACCD_PSEAE	1	1	1	>sp|Q9HZA7|ACCD_PSEAE Acetyl-coenzyme A carboxylase carboxyl transferase subunit beta OS=Pseudomonas aeruginosa (strain ATCC 15692 / PAO1 / 1C / PRS 101 / LMG 12228) GN=accD PE=1 SV=1	1	1	1	1	5.9	5.9	5.9	31.843	290	290	0	6.2663	575210	1				49	227	TRUE	246	400	862	862
sp|Q9HZE0|DHE2_PSEAE	sp|Q9HZE0|DHE2_PSEAE	10	10	10	>sp|Q9HZE0|DHE2_PSEAE NAD-specific glutamate dehydrogenase OS=Pseudomonas aeruginosa (strain ATCC 15692 / PAO1 / 1C / PRS 101 / LMG 12228) GN=gdhB PE=1 SV=1	1	10	10	10	9.1	9.1	9.1	182.64	1620	1620	0	74.857	8026300	16				50	29;44;67;111;228;240;263;289;416;468	True;True;True;True;True;True;True;True;True;True	32;48;72;121;247;259;283;310;448;503	59;93;123;193;401;402;422;465;503;767;855	178;179;234;288;289;417;863;864;922;923;1008;1084;1085;1086;1772;1974	178;234;288;417;863;923;1008;1086;1772;1974
sp|Q9HZJ2|FADB_PSEAE	sp|Q9HZJ2|FADB_PSEAE	2	2	2	>sp|Q9HZJ2|FADB_PSEAE Fatty acid oxidation complex subunit alpha OS=Pseudomonas aeruginosa (strain ATCC 15692 / PAO1 / 1C / PRS 101 / LMG 12228) GN=fadB PE=3 SV=1	1	2	2	2	5.2	5.2	5.2	76.953	715	715	0	23.71	963830	5				51	139;383	True;True	151;414	235;712;713	474;475;1633;1634;1635	475;1634
sp|Q9I0J6|NUOG_PSEAE	sp|Q9I0J6|NUOG_PSEAE	2	2	2	>sp|Q9I0J6|NUOG_PSEAE NADH-quinone oxidoreductase subunit G OS=Pseudomonas aeruginosa (strain ATCC 15692 / PAO1 / 1C / PRS 101 / LMG 12228) GN=nuoG PE=3 SV=1	1	2	2	2	2.8	2.8	2.8	98.999	905	905	0	12.707	474000	3				52	50;273	True;True	54;293	100;478	248;249;1028	249;1028
sp|Q9I0J9|NUOCD_PSEAE	sp|Q9I0J9|NUOCD_PSEAE	1	1	1	>sp|Q9I0J9|NUOCD_PSEAE NADH-quinone oxidoreductase subunit C/D OS=Pseudomonas aeruginosa (strain ATCC 15692 / PAO1 / 1C / PRS 101 / LMG 12228) GN=nuoC PE=3 SV=1	1	1	1	1	2	2	2	68.322	593	593	0	5.8217	437350	1				53	122	TRUE	133	210	442	442
sp|Q9I0K4|ACEA_PSEAE	sp|Q9I0K4|ACEA_PSEAE	8	8	8	>sp|Q9I0K4|ACEA_PSEAE Isocitrate lyase OS=Pseudomonas aeruginosa (strain ATCC 15692 / PAO1 / 1C / PRS 101 / LMG 12228) GN=PA2634 PE=1 SV=1	1	8	8	8	20	20	20	58.886	531	531	0	91.986	23356000	26				54	103;114;162;261;287;307;367;438	True;True;True;True;True;True;True;True	112;124;176;281;308;334;398;472	182;183;196;275;462;501;560;561;682;683;684;806;807	402;403;404;405;420;563;564;1005;1079;1080;1081;1250;1251;1252;1253;1559;1560;1561;1562;1563;1564;1565;1566;1567;1859;1860	403;420;563;1005;1079;1250;1564;1859
sp|Q9I2U8|SYQ_PSEAE	sp|Q9I2U8|SYQ_PSEAE	1	1	1	>sp|Q9I2U8|SYQ_PSEAE Glutamine--tRNA ligase OS=Pseudomonas aeruginosa (strain ATCC 15692 / PAO1 / 1C / PRS 101 / LMG 12228) GN=glnS PE=1 SV=1	1	1	1	1	2.2	2.2	2.2	62.912	556	556	0.0091743	5.6431	410990	1				55	95	TRUE	103	169	386	386	21	376
sp|Q9I2V5|ACNB_PSEAE	sp|Q9I2V5|ACNB_PSEAE	9	9	9	>sp|Q9I2V5|ACNB_PSEAE Aconitate hydratase B OS=Pseudomonas aeruginosa (strain ATCC 15692 / PAO1 / 1C / PRS 101 / LMG 12228) GN=acnB PE=3 SV=1	1	9	9	9	13.8	13.8	13.8	93.627	869	869	0	73.082	22776000	19				56	8;17;71;237;270;298;362;380;432	True;True;True;True;True;True;True;True;True	8;18;76;256;290;322;393;411;464	16;17;33;34;129;130;415;473;522;523;670;708;709;790;791	68;69;107;108;297;298;299;300;884;1022;1127;1128;1129;1494;1629;1630;1816;1817;1818	69;108;298;884;1022;1127;1494;1629;1817
sp|Q9I3D1|DLDH2_PSEAE	sp|Q9I3D1|DLDH2_PSEAE	8	8	8	>sp|Q9I3D1|DLDH2_PSEAE Dihydrolipoyl dehydrogenase OS=Pseudomonas aeruginosa (strain ATCC 15692 / PAO1 / 1C / PRS 101 / LMG 12228) GN=lpdG PE=3 SV=1	1	8	8	8	25.1	25.1	25.1	50.164	478	478	0	81.062	24374000	22				57	7;39;47;49;161;310;332;385	True;True;True;True;True;True;True;True	7;42;51;53;175;337;360;416	14;15;76;77;97;99;273;274;566;567;606;716;717	62;63;64;65;66;67;202;203;204;243;244;245;247;561;562;1259;1260;1336;1337;1640;1641;1642	66;202;244;247;562;1260;1337;1641
sp|Q9I3F5|ACNA_PSEAE	sp|Q9I3F5|ACNA_PSEAE	14	14	14	>sp|Q9I3F5|ACNA_PSEAE Aconitate hydratase A OS=Pseudomonas aeruginosa (strain ATCC 15692 / PAO1 / 1C / PRS 101 / LMG 12228) GN=acnA PE=3 SV=1	1	14	14	14	24.4	24.4	24.4	99.147	910	910	0	110.52	38673000	37				58	24;57;130;201;226;257;378;393;395;415;418;419;445;467	True;True;True;True;True;True;True;True;True;True;True;True;True;True	27;61;142;220;245;276;409;424;426;447;450;451;479;502	51;52;109;222;347;398;399;451;704;705;728;731;732;765;766;769;770;771;815;853;854	167;168;264;458;459;711;860;861;987;988;989;1621;1622;1623;1624;1625;1626;1661;1665;1666;1667;1668;1669;1670;1671;1672;1673;1674;1769;1770;1771;1774;1775;1776;1872;1970;1971;1972;1973	168;264;459;711;861;988;1622;1661;1666;1770;1774;1776;1872;1970	22	88
sp|Q9I4Z4|PAL_PSEAE	sp|Q9I4Z4|PAL_PSEAE	1	1	1	>sp|Q9I4Z4|PAL_PSEAE Peptidoglycan-associated lipoprotein OS=Pseudomonas aeruginosa (strain ATCC 15692 / PAO1 / 1C / PRS 101 / LMG 12228) GN=pal PE=3 SV=1	1	1	1	1	11.3	11.3	11.3	17.925	168	168	0	11.036	1808200	2				59	465	TRUE	500	851	1967;1968	1967
sp|Q9I558|ACSA1_PSEAE	sp|Q9I558|ACSA1_PSEAE	1	1	1	>sp|Q9I558|ACSA1_PSEAE Acetyl-coenzyme A synthetase 1 OS=Pseudomonas aeruginosa (strain ATCC 15692 / PAO1 / 1C / PRS 101 / LMG 12228) GN=acsA1 PE=3 SV=1	1	1	1	1	2.9	2.9	2.9	71.762	651	651	0	6.463	773060	1				60	100	TRUE	108	175	392	392
sp|Q9I576|HPPD_PSEAE	sp|Q9I576|HPPD_PSEAE	3	3	3	>sp|Q9I576|HPPD_PSEAE 4-hydroxyphenylpyruvate dioxygenase OS=Pseudomonas aeruginosa (strain ATCC 15692 / PAO1 / 1C / PRS 101 / LMG 12228) GN=hpd PE=3 SV=1	1	3	3	3	15.4	15.4	15.4	39.912	357	357	0	33.073	4778200	8				61	126;281;303	True;True;True	137;138;301;330	217;218;492;553;554;555	451;452;1067;1240;1241;1242;1243;1244	451;1067;1241	23	269
sp|Q9I589|CBPD_PSEAE	sp|Q9I589|CBPD_PSEAE	1	1	1	>sp|Q9I589|CBPD_PSEAE Chitin-binding protein CbpD OS=Pseudomonas aeruginosa (strain ATCC 15692 / PAO1 / 1C / PRS 101 / LMG 12228) GN=cbpD PE=1 SV=1	1	1	1	1	3.6	3.6	3.6	41.916	389	389	0	7.8114	0	1				62	48	TRUE	52	98	246	246
sp|Q9I636|MASZ_PSEAE	sp|Q9I636|MASZ_PSEAE	1	1	1	>sp|Q9I636|MASZ_PSEAE Malate synthase G OS=Pseudomonas aeruginosa (strain ATCC 15692 / PAO1 / 1C / PRS 101 / LMG 12228) GN=glcB PE=3 SV=1	1	1	1	1	1.5	1.5	1.5	78.659	725	725	0	6.3505	0	1				63	207	TRUE	226	364	786	786
sp|Q9I685|SAHH_PSEAE	sp|Q9I685|SAHH_PSEAE	6	6	6	>sp|Q9I685|SAHH_PSEAE Adenosylhomocysteinase OS=Pseudomonas aeruginosa (strain ATCC 15692 / PAO1 / 1C / PRS 101 / LMG 12228) GN=ahcY PE=3 SV=1	1	6	6	6	16.2	16.2	16.2	51.399	469	469	0	40.625	20271000	16				64	137;184;198;275;285;452	True;True;True;True;True;True	149;200;216;217;295;305;487	231;232;314;341;342;343;481;497;825;826	469;470;471;638;698;699;700;701;702;703;704;705;1041;1074;1886;1887	471;638;705;1041;1074;1886	24	387
sp|Q9I6M4|DAVT_PSEAE	sp|Q9I6M4|DAVT_PSEAE	3	3	3	>sp|Q9I6M4|DAVT_PSEAE 5-aminovalerate aminotransferase DavT OS=Pseudomonas aeruginosa (strain ATCC 15692 / PAO1 / 1C / PRS 101 / LMG 12228) GN=davT PE=1 SV=1	1	3	3	3	12.2	12.2	12.2	45.22	426	426	0	23.29	6769700	8				65	220;361;373	True;True;True	239;392;404	390;391;668;669;696	837;838;839;1491;1492;1493;1611;1612	838;1493;1611
sp|Q9I6M5|DAVD_PSEAE	sp|Q9I6M5|DAVD_PSEAE	2	2	2	>sp|Q9I6M5|DAVD_PSEAE Glutarate-semialdehyde dehydrogenase DavD OS=Pseudomonas aeruginosa (strain ATCC 15692 / PAO1 / 1C / PRS 101 / LMG 12228) GN=davD PE=1 SV=1	1	2	2	2	7.2	7.2	7.2	51.622	483	483	0	33.918	6666800	8				66	265;424	True;True	285;456	467;778;779	1012;1013;1790;1791;1792;1793;1794;1795	1012;1791
sp|Q9I747|HCP1_PSEAE	sp|Q9I747|HCP1_PSEAE	1	1	1	>sp|Q9I747|HCP1_PSEAE Protein hcp1 OS=Pseudomonas aeruginosa (strain ATCC 15692 / PAO1 / 1C / PRS 101 / LMG 12228) GN=hcp1 PE=1 SV=1	1	1	1	1	6.2	6.2	6.2	17.414	162	162	0.0086957	5.5819	781690	1				67	426	TRUE	458	781	1798	1798
sp|Q9I7B8|SYGB_PSEAE	sp|Q9I7B8|SYGB_PSEAE	1	1	1	>sp|Q9I7B8|SYGB_PSEAE Glycine--tRNA ligase beta subunit OS=Pseudomonas aeruginosa (strain ATCC 15692 / PAO1 / 1C / PRS 101 / LMG 12228) GN=glyS PE=3 SV=1	1	1	1	1	1.8	1.8	1.8	73.973	684	684	0.008547	5.5732	656650	1				68	206	TRUE	225	363	785	785
sp|Q9S508|PHZB2_PSEAE;sp|O69753|PHZB1_PSEAE	sp|Q9S508|PHZB2_PSEAE;sp|O69753|PHZB1_PSEAE	4;2	4;2	4;2	>sp|Q9S508|PHZB2_PSEAE Phenazine biosynthesis protein PhzB 2 OS=Pseudomonas aeruginosa (strain ATCC 15692 / PAO1 / 1C / PRS 101 / LMG 12228) GN=phzB2 PE=1 SV=1;>sp|O69753|PHZB1_PSEAE Phenazine biosynthesis protein PhzB 1 OS=Pseudomonas aeruginosa (strain A	2	4	4	4	32.7	32.7	32.7	19.027	162	162;162	0	27.947	10592000	9				69	37;38;193;294	True;True;True;True	40;41;211;317	72;73;74;75;334;514	198;199;200;201;684;685;1114;1115;1116	198;201;685;1116
sp|Q9X4G0|HGD_PSEAE	sp|Q9X4G0|HGD_PSEAE	1	1	1	>sp|Q9X4G0|HGD_PSEAE Homogentisate 1,2-dioxygenase OS=Pseudomonas aeruginosa (strain ATCC 15692 / PAO1 / 1C / PRS 101 / LMG 12228) GN=hmgA PE=3 SV=2	1	1	1	1	4.4	4.4	4.4	47.841	432	432	0	5.8447	247520	1				70	449	TRUE	483	821	1882	1882
tr|Q9HTB5|Q9HTB5_PSEAE	tr|Q9HTB5|Q9HTB5_PSEAE	1	1	1	>tr|Q9HTB5|Q9HTB5_PSEAE Uncharacterized protein OS=Pseudomonas aeruginosa (strain ATCC 15692 / PAO1 / 1C / PRS 101 / LMG 12228) GN=PA5455 PE=4 SV=1	1	1	1	1	1.5	1.5	1.5	61.018	542	542	0	5.7747	3581300	1				71	93	TRUE	101	166	382	382
tr|Q9HTD0|Q9HTD0_PSEAE	tr|Q9HTD0|Q9HTD0_PSEAE	2	2	2	>tr|Q9HTD0|Q9HTD0_PSEAE Probable biotin carboxylase subunit of a transcarboxylase OS=Pseudomonas aeruginosa (strain ATCC 15692 / PAO1 / 1C / PRS 101 / LMG 12228) GN=PA5436 PE=4 SV=1	1	2	2	2	5.3	5.3	5.3	51.848	471	471	0	10.675	413670	1				72	248;471	True;True	267;506	434;858	944;1985	944;1985
tr|Q9HTD1|Q9HTD1_PSEAE	tr|Q9HTD1|Q9HTD1_PSEAE	25	25	25	>tr|Q9HTD1|Q9HTD1_PSEAE Probable transcarboxylase subunit OS=Pseudomonas aeruginosa (strain ATCC 15692 / PAO1 / 1C / PRS 101 / LMG 12228) GN=PA5435 PE=4 SV=1	1	25	25	25	52.6	52.6	52.6	66.095	607	607	0	238.04	428060000	222				73	3;5;40;63;79;88;125;152;155;156;173;177;219;293;322;337;338;374;433;434;435;458;459;460;462	True;True;True;True;True;True;True;True;True;True;True;True;True;True;True;True;True;True;True;True;True;True;True;True;True	3;5;43;44;68;86;87;96;136;165;168;169;170;187;188;192;193;238;315;316;350;365;366;367;405;465;466;467;468;469;493;494;495;497	6;7;9;10;11;12;78;79;80;81;82;83;118;119;145;146;147;148;159;160;161;215;216;256;257;262;263;264;265;266;293;294;295;301;302;303;304;388;389;510;511;512;513;587;588;589;590;614;615;616;617;618;619;620;621;697;698;792;793;794;795;796;797;798;799;800;801;802;839;840;841;842;843;844;846;847	33;34;35;36;37;39;40;41;42;43;44;45;46;47;48;49;50;51;52;53;54;55;56;57;58;205;206;207;208;209;210;211;212;213;214;282;283;329;330;331;332;333;334;335;336;337;364;365;366;367;368;369;370;371;372;373;374;375;376;447;448;449;450;516;517;518;519;520;521;522;530;531;532;533;534;535;536;537;538;539;540;541;542;543;544;545;546;547;548;549;550;551;596;597;598;599;600;617;618;619;620;621;622;623;624;625;…	33;43;211;283;331;370;449;521;540;549;597;617;836;1103;1297;1351;1367;1613;1819;1836;1851;1944;1951;1955;1961	25;26;27;28;29;30;31;32;33	125;169;172;182;239;274;306;323;435
tr|Q9HTD9|Q9HTD9_PSEAE	tr|Q9HTD9|Q9HTD9_PSEAE	2	2	2	>tr|Q9HTD9|Q9HTD9_PSEAE Alcohol dehydrogenase OS=Pseudomonas aeruginosa (strain ATCC 15692 / PAO1 / 1C / PRS 101 / LMG 12228) GN=adhA PE=1 SV=1	1	2	2	2	8.5	8.5	8.5	35.911	342	342	0	11.946	739190	3				74	4;176	True;True	4;191	8;300	38;615;616	38;616
tr|Q9HTP2|Q9HTP2_PSEAE	tr|Q9HTP2|Q9HTP2_PSEAE	4	4	4	>tr|Q9HTP2|Q9HTP2_PSEAE Probable aldehyde dehydrogenase OS=Pseudomonas aeruginosa (strain ATCC 15692 / PAO1 / 1C / PRS 101 / LMG 12228) GN=PA5312 PE=3 SV=1	1	4	4	4	12.7	12.7	12.7	53.143	497	497	0	30.567	10309000	7				75	169;170;246;355	True;True;True;True	183;184;265;385	286;287;288;430;431;648	586;587;588;939;940;941;1437	586;588;940;1437
tr|Q9HU07|Q9HU07_PSEAE	tr|Q9HU07|Q9HU07_PSEAE	1	1	1	>tr|Q9HU07|Q9HU07_PSEAE Uncharacterized protein OS=Pseudomonas aeruginosa (strain ATCC 15692 / PAO1 / 1C / PRS 101 / LMG 12228) GN=PA5182 PE=4 SV=1	1	1	1	1	37.2	37.2	37.2	14.115	137	137	0.0088496	5.5866	7541100	2				76	368	TRUE	399	685;686	1568;1569	1568
tr|Q9HUD3|Q9HUD3_PSEAE	tr|Q9HUD3|Q9HUD3_PSEAE	4	4	4	>tr|Q9HUD3|Q9HUD3_PSEAE Malic enzyme OS=Pseudomonas aeruginosa (strain ATCC 15692 / PAO1 / 1C / PRS 101 / LMG 12228) GN=PA5046 PE=4 SV=1	1	4	4	4	13.7	13.7	13.7	45.428	422	422	0	29.506	1969800	6				77	0;76;252;336	True;True;True;True	0;83;271;364	0;141;444;613	0;1;323;976;1348;1349	1;323;976;1348
tr|Q9HVJ1|Q9HVJ1_PSEAE	tr|Q9HVJ1|Q9HVJ1_PSEAE	1	1	1	>tr|Q9HVJ1|Q9HVJ1_PSEAE Probable ATP-binding component of ABC transporter OS=Pseudomonas aeruginosa (strain ATCC 15692 / PAO1 / 1C / PRS 101 / LMG 12228) GN=PA4595 PE=4 SV=1	1	1	1	1	1.6	1.6	1.6	61.32	554	554	0.009009	5.6028	0	2				78	181	TRUE	197	310;311	634;635	635
tr|Q9HVY6|Q9HVY6_PSEAE	tr|Q9HVY6|Q9HVY6_PSEAE	1	1	1	>tr|Q9HVY6|Q9HVY6_PSEAE Probable cytochrome c1 OS=Pseudomonas aeruginosa (strain ATCC 15692 / PAO1 / 1C / PRS 101 / LMG 12228) GN=PA4429 PE=4 SV=1	1	1	1	1	5.8	5.8	5.8	28.993	260	260	0	8.5483	925620	2				79	392	TRUE	423	727	1659;1660	1660
tr|Q9HW32|Q9HW32_PSEAE	tr|Q9HW32|Q9HW32_PSEAE	1	1	1	>tr|Q9HW32|Q9HW32_PSEAE Insulin-cleaving metalloproteinase outer membrane protein OS=Pseudomonas aeruginosa (strain ATCC 15692 / PAO1 / 1C / PRS 101 / LMG 12228) GN=icmP PE=4 SV=1	1	1	1	1	5.2	5.2	5.2	47.23	446	446	0	7.8513	123460	3				80	6	TRUE	6	13	59;60;61	59
tr|Q9HW49|Q9HW49_PSEAE	tr|Q9HW49|Q9HW49_PSEAE	6	6	6	>tr|Q9HW49|Q9HW49_PSEAE Uncharacterized protein OS=Pseudomonas aeruginosa (strain ATCC 15692 / PAO1 / 1C / PRS 101 / LMG 12228) GN=PA4352 PE=3 SV=1	1	6	6	6	35.7	35.7	35.7	30.972	286	286	0	44.949	4740400	11				81	60;85;223;402;405;417	True;True;True;True;True;True	64;65;93;242;433;436;437;449	112;113;114;155;394;742;746;747;768	268;269;270;271;358;852;1729;1735;1736;1737;1773	270;358;852;1729;1735;1773	34;35	100;158
tr|Q9HWV0|Q9HWV0_PSEAE	tr|Q9HWV0|Q9HWV0_PSEAE	6	6	6	>tr|Q9HWV0|Q9HWV0_PSEAE Probable nonribosomal peptide synthetase OS=Pseudomonas aeruginosa (strain ATCC 15692 / PAO1 / 1C / PRS 101 / LMG 12228) GN=PA4078 PE=4 SV=1	1	6	6	6	8.8	8.8	8.8	110.35	991	991	0	44.414	7435900	8				82	61;127;268;346;403;464	True;True;True;True;True;True	66;139;288;375;434;499	115;219;471;633;634;743;850	272;453;1019;1020;1390;1391;1730;1966	272;453;1019;1390;1730;1966
tr|Q9I2C4|Q9I2C4_PSEAE;tr|Q9HX05|Q9HX05_PSEAE	tr|Q9I2C4|Q9I2C4_PSEAE;tr|Q9HX05|Q9HX05_PSEAE	2;2	2;2	2;2	>tr|Q9I2C4|Q9I2C4_PSEAE NAD+ dependent aldehyde dehydrogenase ExaC OS=Pseudomonas aeruginosa (strain ATCC 15692 / PAO1 / 1C / PRS 101 / LMG 12228) GN=exaC PE=3 SV=1;>tr|Q9HX05|Q9HX05_PSEAE Probable aldehyde dehydrogenase OS=Pseudomonas aeruginosa (strain A	2	2	2	2	6.3	6.3	6.3	54.892	506	506;506	0	17.228	5048600	5				83	168;233	True;True	182;252	284;285;409	583;584;585;873;874	583;873
tr|Q9HY01|Q9HY01_PSEAE	tr|Q9HY01|Q9HY01_PSEAE	1	1	1	>tr|Q9HY01|Q9HY01_PSEAE S-(hydroxymethyl)glutathione dehydrogenase OS=Pseudomonas aeruginosa (strain ATCC 15692 / PAO1 / 1C / PRS 101 / LMG 12228) GN=adhC PE=3 SV=1	1	1	1	1	3	3	3	39.208	370	370	0	6.5478	339470	1				84	104	TRUE	113	184	406	406
tr|Q9HY13|Q9HY13_PSEAE	tr|Q9HY13|Q9HY13_PSEAE	1	1	1	>tr|Q9HY13|Q9HY13_PSEAE Uncharacterized protein OS=Pseudomonas aeruginosa (strain ATCC 15692 / PAO1 / 1C / PRS 101 / LMG 12228) GN=PA3613 PE=4 SV=1	1	1	1	1	2.7	2.7	2.7	88.378	801	801	0.0090909	5.6211	729580	1				85	366	TRUE	397	681	1558	1558
tr|Q9HY79|Q9HY79_PSEAE	tr|Q9HY79|Q9HY79_PSEAE	2	2	2	>tr|Q9HY79|Q9HY79_PSEAE Ferroxidase OS=Pseudomonas aeruginosa (strain ATCC 15692 / PAO1 / 1C / PRS 101 / LMG 12228) GN=bfrB PE=1 SV=1	1	2	2	2	20.3	20.3	20.3	18.553	158	158	0	12.817	3987100	4				86	192;194	True;True	210;212	333;335;336	683;686;687;688	683;687
tr|Q9HY81|Q9HY81_PSEAE	tr|Q9HY81|Q9HY81_PSEAE	5	5	5	>tr|Q9HY81|Q9HY81_PSEAE Probable peroxidase OS=Pseudomonas aeruginosa (strain ATCC 15692 / PAO1 / 1C / PRS 101 / LMG 12228) GN=PA3529 PE=1 SV=1	1	5	5	5	25.5	25.5	25.5	21.822	200	200	0	40.543	41048000	20				87	62;132;312;317;356	True;True;True;True;True	67;144;339;345;386	116;117;225;570;571;580;649;650	273;274;275;276;277;278;279;280;281;463;1265;1266;1275;1438;1439;1440;1441;1442;1443;1444	278;463;1265;1275;1443
tr|Q9HYT5|Q9HYT5_PSEAE	tr|Q9HYT5|Q9HYT5_PSEAE	5	5	5	>tr|Q9HYT5|Q9HYT5_PSEAE Uncharacterized protein OS=Pseudomonas aeruginosa (strain ATCC 15692 / PAO1 / 1C / PRS 101 / LMG 12228) GN=PA3309 PE=3 SV=1	1	5	5	5	41.7	41.7	41.7	16.496	151	151	0	42.001	36646000	15				88	166;197;260;401;411	True;True;True;True;True	180;215;279;280;432;443	282;339;340;458;459;460;461;741;757;758	581;693;694;695;696;697;1001;1002;1003;1004;1728;1753;1754;1755;1756	581;696;1004;1728;1754	36	129
tr|Q9HZK4|Q9HZK4_PSEAE	tr|Q9HZK4|Q9HZK4_PSEAE	3	3	3	>tr|Q9HZK4|Q9HZK4_PSEAE Glyceraldehyde-3-phosphate dehydrogenase OS=Pseudomonas aeruginosa (strain ATCC 15692 / PAO1 / 1C / PRS 101 / LMG 12228) GN=PA3001 PE=3 SV=1	1	3	3	3	8	8	8	50.111	461	461	0	25.753	1760400	3				89	96;236;335	True;True;True	104;255;363	170;414;612	387;883;1347	387;883;1347
tr|Q9I028|Q9I028_PSEAE	tr|Q9I028|Q9I028_PSEAE	4	4	4	>tr|Q9I028|Q9I028_PSEAE Probable acyl-CoA dehydrogenase OS=Pseudomonas aeruginosa (strain ATCC 15692 / PAO1 / 1C / PRS 101 / LMG 12228) GN=PA2815 PE=4 SV=1	1	4	4	4	11.2	11.2	11.2	88.762	815	815	0	26.181	6092100	8				90	112;196;238;431	True;True;True;True	122;214;257;463	194;338;416;417;789	418;690;691;692;885;886;1814;1815	418;691;885;1814
tr|Q9I0L4|Q9I0L4_PSEAE	tr|Q9I0L4|Q9I0L4_PSEAE	2	2	2	>tr|Q9I0L4|Q9I0L4_PSEAE Isocitrate dehydrogenase OS=Pseudomonas aeruginosa (strain ATCC 15692 / PAO1 / 1C / PRS 101 / LMG 12228) GN=idh PE=4 SV=1	1	2	2	2	3.8	3.8	3.8	81.633	741	741	0	11.496	820630	2				91	84;195	True;True	92;213	154;337	357;689	357;689
tr|Q9I0L5|Q9I0L5_PSEAE	tr|Q9I0L5|Q9I0L5_PSEAE	8	8	8	>tr|Q9I0L5|Q9I0L5_PSEAE Isocitrate dehydrogenase [NADP] OS=Pseudomonas aeruginosa (strain ATCC 15692 / PAO1 / 1C / PRS 101 / LMG 12228) GN=icd PE=3 SV=1	1	8	8	8	26.1	26.1	26.1	45.577	418	418	0	74.627	14488000	15				92	36;54;86;129;150;314;391;425	True;True;True;True;True;True;True;True	39;58;94;141;162;342;422;457	70;71;105;156;157;221;252;576;726;780	195;196;197;257;258;359;360;361;456;457;509;1271;1658;1796;1797	195;258;359;457;509;1271;1658;1796
tr|Q9I0T1|Q9I0T1_PSEAE	tr|Q9I0T1|Q9I0T1_PSEAE	3	3	3	>tr|Q9I0T1|Q9I0T1_PSEAE Probable acyl-CoA thiolase OS=Pseudomonas aeruginosa (strain ATCC 15692 / PAO1 / 1C / PRS 101 / LMG 12228) GN=PA2553 PE=3 SV=1	1	3	3	3	9.8	9.8	9.8	41.4	396	396	0	24.718	1776100	3				93	83;92;381	True;True;True	91;100;412	153;165;710	356;381;1631	356;381;1631
tr|Q9I1E7|Q9I1E7_PSEAE	tr|Q9I1E7|Q9I1E7_PSEAE	3	3	3	>tr|Q9I1E7|Q9I1E7_PSEAE Alkyl hydroperoxide reductase AhpD OS=Pseudomonas aeruginosa (strain ATCC 15692 / PAO1 / 1C / PRS 101 / LMG 12228) GN=PA2331 PE=3 SV=1	1	3	3	3	17.7	17.7	17.7	19.904	186	186	0	17.832	2454400	3				94	135;269;379	True;True;True	147;289;410	229;472;706;707	467;1021;1627;1628	467;1021;1628
tr|Q9I1E8|Q9I1E8_PSEAE	tr|Q9I1E8|Q9I1E8_PSEAE	1	1	1	>tr|Q9I1E8|Q9I1E8_PSEAE Uncharacterized protein OS=Pseudomonas aeruginosa (strain ATCC 15692 / PAO1 / 1C / PRS 101 / LMG 12228) GN=PA2330 PE=4 SV=1	1	1	1	1	3.9	3.9	3.9	37.68	355	355	0.0093458	5.6564	0	1				95	242	TRUE	261	424	925	925
tr|Q9I1H3|Q9I1H3_PSEAE	tr|Q9I1H3|Q9I1H3_PSEAE	2	2	2	>tr|Q9I1H3|Q9I1H3_PSEAE AmbE OS=Pseudomonas aeruginosa (strain ATCC 15692 / PAO1 / 1C / PRS 101 / LMG 12228) GN=ambE PE=4 SV=1	1	2	2	2	1.3	1.3	1.3	229.04	2124	2124	0	10.775	945050	1				96	255;399	True;True	274;430	449;738	984;1717	984;1717
tr|Q9I1H5|Q9I1H5_PSEAE	tr|Q9I1H5|Q9I1H5_PSEAE	6	6	6	>tr|Q9I1H5|Q9I1H5_PSEAE Chitinase OS=Pseudomonas aeruginosa (strain ATCC 15692 / PAO1 / 1C / PRS 101 / LMG 12228) GN=chiC PE=3 SV=1	1	6	6	6	20.1	20.1	20.1	53.042	483	483	0	38.332	11936000	14				97	144;172;224;320;398;454	True;True;True;True;True;True	156;186;243;348;429;489	242;291;292;395;396;584;737;829	487;488;593;594;595;853;854;855;856;857;1281;1282;1716;1892	487;594;854;1281;1716;1892
tr|Q9I246|Q9I246_PSEAE	tr|Q9I246|Q9I246_PSEAE	7	7	7	>tr|Q9I246|Q9I246_PSEAE Probable carbamoyl transferase OS=Pseudomonas aeruginosa (strain ATCC 15692 / PAO1 / 1C / PRS 101 / LMG 12228) GN=PA2069 PE=4 SV=1	1	7	7	7	20.4	20.4	20.4	63.382	574	574	0	48.381	16095000	17				98	70;167;209;334;345;349;350	True;True;True;True;True;True;True	75;181;228;362;374;378;379	127;128;283;367;368;609;610;611;631;632;639;640	295;296;582;789;790;791;792;1341;1342;1343;1344;1345;1346;1388;1389;1397;1398;1399;1400	295;582;791;1344;1388;1398;1400
tr|Q9I299|Q9I299_PSEAE	tr|Q9I299|Q9I299_PSEAE	8	8	8	>tr|Q9I299|Q9I299_PSEAE Methylcrotonyl-CoA carboxylase, alpha-subunit (Biotin-containing) OS=Pseudomonas aeruginosa (strain ATCC 15692 / PAO1 / 1C / PRS 101 / LMG 12228) GN=liuD PE=1 SV=1	1	8	8	8	13	13	13	71.282	655	655	0	58.917	11095000	13				99	30;87;183;232;247;288;442;443	True;True;True;True;True;True;True;True	33;95;199;251;266;309;476;477	60;61;158;313;408;432;433;502;812;813	180;181;362;363;637;872;942;943;1082;1083;1866;1867;1868	180;362;637;872;942;1083;1867;1868
tr|Q9I2A2|Q9I2A2_PSEAE	tr|Q9I2A2|Q9I2A2_PSEAE	1	1	1	>tr|Q9I2A2|Q9I2A2_PSEAE Fumarylacetoacetase OS=Pseudomonas aeruginosa (strain ATCC 15692 / PAO1 / 1C / PRS 101 / LMG 12228) GN=fahA PE=4 SV=1	1	1	1	1	4.9	4.9	4.9	46.341	432	432	0.0086207	5.5771	256520	3				100	342	TRUE	371	627	1382;1383;1384	1383
tr|Q9I2A6|Q9I2A6_PSEAE	tr|Q9I2A6|Q9I2A6_PSEAE	1	1	1	>tr|Q9I2A6|Q9I2A6_PSEAE 3-hydroxybutyrate dehydrogenase OS=Pseudomonas aeruginosa (strain ATCC 15692 / PAO1 / 1C / PRS 101 / LMG 12228) GN=bdhA PE=3 SV=1	1	1	1	1	6.2	6.2	6.2	26.727	256	256	0.0092593	5.6558	3668700	2				101	212	TRUE	231	371;372	795;796	796
tr|Q9I2R2|Q9I2R2_PSEAE	tr|Q9I2R2|Q9I2R2_PSEAE	1	1	1	>tr|Q9I2R2|Q9I2R2_PSEAE Probable oxidoreductase OS=Pseudomonas aeruginosa (strain ATCC 15692 / PAO1 / 1C / PRS 101 / LMG 12228) GN=PA1833 PE=4 SV=1	1	1	1	1	5.2	5.2	5.2	34.551	330	330	0	6.6724	259800	1				102	158	TRUE	172	269	554	554
tr|Q9I2W9|Q9I2W9_PSEAE	tr|Q9I2W9|Q9I2W9_PSEAE	3	3	3	>tr|Q9I2W9|Q9I2W9_PSEAE Phosphoenolpyruvate synthase OS=Pseudomonas aeruginosa (strain ATCC 15692 / PAO1 / 1C / PRS 101 / LMG 12228) GN=ppsA PE=3 SV=1	1	3	3	3	5.3	5.3	5.3	85.816	791	791	0	27.632	2591100	4				103	11;32;119	True;True;True	12;35;130	23;64;206	79;80;187;438	80;187;438
tr|Q9I3D3|Q9I3D3_PSEAE	tr|Q9I3D3|Q9I3D3_PSEAE	5	5	5	>tr|Q9I3D3|Q9I3D3_PSEAE 2-oxoglutarate dehydrogenase (E1 subunit) OS=Pseudomonas aeruginosa (strain ATCC 15692 / PAO1 / 1C / PRS 101 / LMG 12228) GN=sucA PE=4 SV=1	1	5	5	5	6.7	6.7	6.7	105.88	943	943	0	36.232	3963400	11				104	69;148;267;295;448	True;True;True;True;True	74;160;287;318;482	126;250;469;470;515;516;820	292;293;294;507;1015;1016;1017;1018;1117;1118;1119;1881	293;507;1015;1118;1881
tr|Q9I3D4|Q9I3D4_PSEAE	tr|Q9I3D4|Q9I3D4_PSEAE	4	4	4	>tr|Q9I3D4|Q9I3D4_PSEAE Succinate dehydrogenase (B subunit) OS=Pseudomonas aeruginosa (strain ATCC 15692 / PAO1 / 1C / PRS 101 / LMG 12228) GN=sdhB PE=4 SV=1	1	4	4	4	22.6	22.6	22.6	26.155	235	235	0	30.55	10031000	9				105	124;231;283;413	True;True;True;True	135;250;303;445	213;214;407;494;495;760;761	445;446;870;871;1071;1072;1760;1761;1762	445;870;1072;1762
tr|Q9I3D5|Q9I3D5_PSEAE	tr|Q9I3D5|Q9I3D5_PSEAE	5	5	5	>tr|Q9I3D5|Q9I3D5_PSEAE Succinate dehydrogenase flavoprotein subunit OS=Pseudomonas aeruginosa (strain ATCC 15692 / PAO1 / 1C / PRS 101 / LMG 12228) GN=sdhA PE=3 SV=1	1	5	5	5	11.5	11.5	11.5	63.531	590	590	0	63.611	27550000	27				106	142;174;175;214;243	True;True;True;True;True	154;189;190;233;262	238;239;296;297;298;299;375;425;426	479;480;481;482;601;602;603;604;605;606;607;608;609;610;611;612;613;614;799;926;927;928;929;930;931;932;933	479;601;611;799;929
tr|Q9I3G2|Q9I3G2_PSEAE	tr|Q9I3G2|Q9I3G2_PSEAE	2	2	2	>tr|Q9I3G2|Q9I3G2_PSEAE Cbb3-type cytochrome c oxidase subunit OS=Pseudomonas aeruginosa (strain ATCC 15692 / PAO1 / 1C / PRS 101 / LMG 12228) GN=ccoP2 PE=3 SV=1	1	2	2	2	7.8	7.8	7.8	33.812	308	308	0	11.748	2309000	3				107	369;451	True;True	400;485;486	687;823;824	1570;1884;1885	1570;1885	37	120
tr|Q9I3G6|Q9I3G6_PSEAE	tr|Q9I3G6|Q9I3G6_PSEAE	1	1	1	>tr|Q9I3G6|Q9I3G6_PSEAE Probable ferredoxin OS=Pseudomonas aeruginosa (strain ATCC 15692 / PAO1 / 1C / PRS 101 / LMG 12228) GN=PA1551 PE=4 SV=1	1	1	1	1	2.1	2.1	2.1	53.62	471	471	0	6.1974	0	1				108	147	TRUE	159	249	506	506
tr|Q9I400|Q9I400_PSEAE	tr|Q9I400|Q9I400_PSEAE	1	1	1	>tr|Q9I400|Q9I400_PSEAE Probable short-chain dehydrogenase OS=Pseudomonas aeruginosa (strain ATCC 15692 / PAO1 / 1C / PRS 101 / LMG 12228) GN=PA1344 PE=4 SV=1	1	1	1	1	5.3	5.3	5.3	27.397	264	264	0	6.0437	340680	1				109	18	TRUE	19	35	109	109
tr|Q9I5E3|Q9I5E3_PSEAE	tr|Q9I5E3|Q9I5E3_PSEAE	2	2	2	>tr|Q9I5E3|Q9I5E3_PSEAE Citrate synthase OS=Pseudomonas aeruginosa (strain ATCC 15692 / PAO1 / 1C / PRS 101 / LMG 12228) GN=prpC PE=3 SV=1	1	2	2	2	5.9	5.9	5.9	41.689	375	375	0	13.763	2655000	5				110	14;188	True;True	15;204	28;320;321	89;645;646;647;648	89;647
tr|Q9I5F6|Q9I5F6_PSEAE	tr|Q9I5F6|Q9I5F6_PSEAE	2	2	2	>tr|Q9I5F6|Q9I5F6_PSEAE Bifunctional protein PutA OS=Pseudomonas aeruginosa (strain ATCC 15692 / PAO1 / 1C / PRS 101 / LMG 12228) GN=putA PE=3 SV=1	1	2	2	2	2.8	2.8	2.8	115.63	1060	1060	0	20.292	798560	4				111	282;429	True;True	302;461	493;786	1068;1069;1070;1803	1069;1803
tr|Q9I5U9|Q9I5U9_PSEAE	tr|Q9I5U9|Q9I5U9_PSEAE	10	10	10	>tr|Q9I5U9|Q9I5U9_PSEAE Uncharacterized protein OS=Pseudomonas aeruginosa (strain ATCC 15692 / PAO1 / 1C / PRS 101 / LMG 12228) GN=PA0588 PE=4 SV=1	1	10	10	10	19.4	19.4	19.4	73.722	640	640	0	88.504	36787000	26				112	80;254;256;258;262;290;306;370;427;446	True;True;True;True;True;True;True;True;True;True	88;273;275;277;282;311;333;401;459;480	149;447;448;450;452;453;463;464;504;505;558;559;688;782;783;816;817	338;339;980;981;982;983;985;986;990;991;992;1006;1007;1087;1088;1089;1090;1248;1249;1571;1572;1799;1800;1873;1874;1875	339;981;985;990;1006;1088;1249;1571;1800;1873	38	412
tr|Q9I654|Q9I654_PSEAE	tr|Q9I654|Q9I654_PSEAE	1	1	1	>tr|Q9I654|Q9I654_PSEAE Histidine kinase OS=Pseudomonas aeruginosa (strain ATCC 15692 / PAO1 / 1C / PRS 101 / LMG 12228) GN=creC PE=4 SV=1	1	1	1	1	3.2	3.2	3.2	52.302	474	474	0.0089286	5.5874	796700	1				113	140	TRUE	152	236	476	476
tr|Q9I659|Q9I659_PSEAE	tr|Q9I659|Q9I659_PSEAE	3	3	3	>tr|Q9I659|Q9I659_PSEAE Probable ClpA/B protease ATP binding subunit OS=Pseudomonas aeruginosa (strain ATCC 15692 / PAO1 / 1C / PRS 101 / LMG 12228) GN=PA0459 PE=4 SV=1	1	3	3	3	5.5	5.5	5.5	94.174	850	850	0	30.197	1337200	5				114	22;251;410	True;True;True	24;270;442	41;42;443;756	122;123;974;975;1752	122;975;1752
tr|Q9I6A0|Q9I6A0_PSEAE	tr|Q9I6A0|Q9I6A0_PSEAE	2	2	2	>tr|Q9I6A0|Q9I6A0_PSEAE Probable cystathionine gamma-lyase OS=Pseudomonas aeruginosa (strain ATCC 15692 / PAO1 / 1C / PRS 101 / LMG 12228) GN=PA0400 PE=3 SV=1	1	2	2	2	10.9	10.9	10.9	42.786	394	394	0	12.67	382210	2				115	241;276	True;True	260;296	423;482	924;1042	924;1042
tr|Q9I6J2|Q9I6J2_PSEAE	tr|Q9I6J2|Q9I6J2_PSEAE	2	2	2	>tr|Q9I6J2|Q9I6J2_PSEAE Putrescine aminotransferase OS=Pseudomonas aeruginosa (strain ATCC 15692 / PAO1 / 1C / PRS 101 / LMG 12228) GN=spuC PE=3 SV=1	1	2	2	2	7.7	7.7	7.7	50.452	456	456	0	11.086	2542900	1				116	107;450	True;True	116;484	187;822	411;1883	411;1883
tr|Q9I6Z3|Q9I6Z3_PSEAE	tr|Q9I6Z3|Q9I6Z3_PSEAE	6	6	6	>tr|Q9I6Z3|Q9I6Z3_PSEAE Alkyl hydroperoxide reductase subunit C OS=Pseudomonas aeruginosa (strain ATCC 15692 / PAO1 / 1C / PRS 101 / LMG 12228) GN=ahpC PE=4 SV=1	1	6	6	6	45.5	45.5	45.5	20.541	187	187	0	43.293	38289000	22				117	46;123;154;351;375;389	True;True;True;True;True;True	50;134;167;380;406;420	95;96;211;212;260;261;641;699;700;723;724	236;237;238;239;240;241;242;443;444;526;527;528;529;1401;1615;1616;1617;1652;1653;1654;1655;1656	239;444;528;1401;1616;1652

[truncated: 3 more sheets: 7-3 proteinGroups Probe 12, 7-3 Sheet1, 7-3 Sheet2]
