# Supplementary material for: Short-chain reactive probes as tools to unravel the Pseudomonas aeruginosa quorum sensing regulon
Source: Royal Society of Chemistry journal article supplement (doi:10.1039/d0sc04444j), 2021-01-01
Supplement: d0sc04444j2.zip [file Luminescence results.xlsx]

## Sheet: Key
Luminescence results	P. aeruginosa PAO- JP2 (PKD-rhlA) agonist assay results (luminescence) of the different experiments for 1-C4-HSL and probes 2-14
Experimental methods	Bacteria were incubated with varying concentrations of probes, OD600 and luminescence was measured
Excel sheets content
LUM+OD600+LUM/OD600	1) Structure-activity results of luminecent agonist assays for 1-C4-HSL and probes 2-14. 2) Structure-activity results of growth (OD600) assays for 1-C4-HSL and probes 2-14 3) Final LUM/OD600 results.
Probes comparison	luminescence/OD600 values at 75% activation for each probe are shown.
Final Lum\OD600	Final agonist results for probes 12, 13 and 14 compared to 1-C4-HSL.
Abbreviations	Lum=Luminescence OD=Optical density EC=Effective Concentration Avg=Average
Addition	Yellow marked cells represent values that were subtracted from EC50 calculations

## Sheet: LUM+OD600+LUM|OD600
	LUM						OD												Lum/OD
	75% activation	320 min					75% activation	320 min											75% activation	320 min
		[µM]	1-C4HSL	1-C4HSL	1-C4HSL		[µM]	1-C4HSL	1-C4HSL	1-C4HSL									[µM]	1-C4HSL	1-C4HSL	1-C4HSL
		1000	11990000	12350000	12310000		1000	0.4778	0.4704	0.4516									1000	2.50942e+07	2.62543e+07	2.72586e+07
		333.333	14830000	15190000	15370000		333.333	0.4384	0.4316	0.434									333.333	3.38276e+07	3.51946e+07	3.54147e+07
		111.111	17410000	15860000	15190000		111.111	0.4797	0.4518	0.4473									111.111	3.62935e+07	3.5104e+07	3.39593e+07
		37.037	15920000	14480000	14070000		37.037	0.4983	0.4601	0.4432									37.037	3.19486e+07	3.14714e+07	3.17464e+07
		12.3457	15790000	13290000	12110000		12.3457	0.4986	0.4787	0.4654									12.3457	3.16687e+07	2.77627e+07	2.60206e+07
		4.11523	9564000	8078000	7190000		4.11523	0.4981	0.4831	0.4715									4.11523	1.9201e+07	1.67212e+07	1.52492e+07
		1.37174	5154000	4195000	3507000		1.37174	0.5049	0.471	0.4777									1.37174	1.0208e+07	8.90658e+06	7.34143e+06
		0.457247	2095000	1614000	1248000		0.457247	0.5027	0.4611	0.4735									0.457247	4.1675e+06	3.50033e+06	2.63569e+06
		0.152416	686300	501500	403700		0.152416	0.4854	0.4459	0.4714									0.152416	1.41389e+06	1.12469e+06	856385
		0	166900	144000	144400		0	0.4728	0.4768	0.4983									0	353003	302013	289785
	LUM						OD												Lum/OD
	75% activation	360 min					75% activation	360 min											75% activation	360 min
		[µM]	Probe 2	Probe 2	Probe 2		[µM]	Probe 2	Probe 2	Probe 2									[µM]	Probe 2	Probe 2	Probe 2
		1000	11770000	12570000	12760000		1000	0.5576	0.517	0.5048									1000	2.11083e+07	2.43133e+07	2.52773e+07
		333.333	16690000	17330000	17390000		333.333	0.5013	0.4818	0.4777									333.333	3.32934e+07	3.59693e+07	3.64036e+07
		111.111	19730000	18640000	18500000		111.111	0.5398	0.4987	0.4844									111.111	3.65506e+07	3.73772e+07	3.81916e+07
		37.037	18870000	17660000	18370000		37.037	0.5256	0.4805	0.4851									37.037	3.59018e+07	3.67534e+07	3.78685e+07
		12.3457	19360000	17140000	16550000		12.3457	0.5404	0.5148	0.5077									12.3457	3.58253e+07	3.32945e+07	3.2598e+07
		4.11523	12370000	10240000	9837000		4.11523	0.5313	0.5084	0.509									4.11523	2.32825e+07	2.01416e+07	1.93261e+07
		1.37174	5592000	4928000	4417000		1.37174	0.5287	0.489	0.5192									1.37174	1.05769e+07	1.00777e+07	8.50732e+06
		0.457247	2022000	1757000	1607000		0.457247	0.5151	0.4931	0.5224									0.457247	3.92545e+06	3.56317e+06	3.07619e+06
		0.152416	651500	625500	587300		0.152416	0.5049	0.5038	0.5053									0.152416	1.29035e+06	1.24156e+06	1.16228e+06
		0	181800	200800	192600		0	0.489	0.5342	0.5214									0	371779	375889	369390
	LUM						OD												Lum/OD
	75% activation	340 min					75% activation	340 min											75% activation	340 min
		[µM]	Probe 3	Probe 3	Probe 3		[µM]	Probe 3	Probe 3	Probe 3									[µM]	Probe 3	Probe 3	Probe 3
		1000	12940000	12830000	12560000		1000	0.4637	0.4778	0.4829									1000	2.7906e+07	2.68522e+07	2.60095e+07
		333.333	16440000	16780000	17190000		333.333	0.4592	0.4939	0.4763									333.333	3.58014e+07	3.39745e+07	3.60907e+07
		111.111	16570000	17360000	17470000		111.111	0.4615	0.4662	0.4664									111.111	3.59047e+07	3.72372e+07	3.74571e+07
		37.037	16140000	18200000	21340000		37.037	0.4739	0.4851	0.504									37.037	3.40578e+07	3.7518e+07	4.23413e+07
		12.3457	13010000	14400000	16200000		12.3457	0.4867	0.495	0.5139									12.3457	2.6731e+07	2.90909e+07	3.15236e+07
		4.11523	6845000	8191000	9798000		4.11523	0.4881	0.5156	0.5297									4.11523	1.40238e+07	1.58863e+07	1.84973e+07
		1.37174	3195000	3695000	4389000		1.37174	0.4894	0.5009	0.5182									1.37174	6.5284e+06	7.37672e+06	8.4697e+06
		0.457247	1112000	1317000	1635000		0.457247	0.4945	0.5088	0.5089									0.457247	2.24874e+06	2.58844e+06	3.21281e+06
		0.152416	440500	520100	616200		0.152416	0.4866	0.5043	0.4934									0.152416	905261	1.03133e+06	1.24889e+06
		0	204000	219400	200100		0	0.4966	0.4933	0.478									0	410793	444760	418619
	LUM						OD												Lum/OD
	75% activation	340 min					75% activation	340 min											75% activation	340 min
		[µM]	Probe 4	Probe 4	Probe 4		[µM]	Probe 4	Probe 4	Probe 4									[µM]	Probe 4	Probe 4	Probe 4
		1000	5984000	6509000	6717000		1000	0.5274	0.5039	0.4882									1000	1.13462e+07	1.29172e+07	1.37587e+07
		333.333	7528000	7709000	7795000		333.333	0.5094	0.5056	0.5026									333.333	1.47782e+07	1.52472e+07	1.55094e+07
		111.111	8122000	7325000	6875000		111.111	0.5498	0.514	0.5024									111.111	1.47726e+07	1.4251e+07	1.36843e+07
		37.037	5390000	4982000	4889000		37.037	0.553	0.5206	0.5018									37.037	9.74684e+06	9.56973e+06	9.74293e+06
		12.3457	3492000	2951000	2591000		12.3457	0.5464	0.5168	0.5085									12.3457	6.39092e+06	5.71014e+06	5.09538e+06
		4.11523	1645000	1440000	1175000		4.11523	0.5426	0.5245	0.5106									4.11523	3.0317e+06	2.74547e+06	2.30121e+06
		1.37174	707400	614700	506700		1.37174	0.5329	0.5147	0.5315									1.37174	1.32745e+06	1.19429e+06	953340
		0.457247	328900	297200	249700		0.457247	0.532	0.5059	0.532									0.457247	618233	587468	469361
		0.152416	224800	227600	208800		0.152416	0.517	0.5022	0.5255									0.152416	434816	453206	397336
		0	187400	181700	172100		0	0.5224	0.5382	0.5522									0	358729	337607	311662
	LUM						OD												Lum/OD
	75% activation	340 min					75% activation	340 min											75% activation	340 min
		[µM]	Probe 5	Probe 5	Probe 5		[µM]	Probe 5	Probe 5	Probe 5									[µM]	Probe 5	Probe 5	Probe 5
		1000	7360000	7305000	6693000		1000	0.4837	0.4973	0.5074									1000	1.5216e+07	1.46893e+07	1.31908e+07
		333.333	8764000	9200000	9353000		333.333	0.4763	0.5064	0.5036									333.333	1.84002e+07	1.81675e+07	1.85723e+07
		111.111	8057000	8482000	8863000		111.111	0.4923	0.5148	0.5271									111.111	1.6366e+07	1.64763e+07	1.68146e+07
		37.037	5990000	6934000	8592000		37.037	0.5115	0.5345	0.5701									37.037	1.17107e+07	1.29729e+07	1.5071e+07
		12.3457	3097000	3596000	3653000		12.3457	0.5042	0.5334	0.5378									12.3457	6.1424e+06	6.74166e+06	6.79249e+06
		4.11523	1156000	1435000	1907000		4.11523	0.5177	0.5494	0.5639									4.11523	2.23295e+06	2.61194e+06	3.38181e+06
		1.37174	446500	528000	694300		1.37174	0.5209	0.5399	0.5625									1.37174	857170	977959	1.23431e+06
		0.457247	240400	291700	355500		0.457247	0.5362	0.5493	0.5485									0.457247	448340	531040	648131
		0.152416	204500	243300	265500		0.152416	0.5316	0.5433	0.54									0.152416	384688	447819	491667
		0	164000	198400	181400		0	0.5498	0.5424	0.5115									0	298290	365782	354643
	LUM						OD												Lum/OD
	75% activation	320 min					75% activation	320 min											75% activation	320 min
		[µM]	Probe 6	Probe 6	Probe 6		[µM]	Probe 6	Probe 6	Probe 6									[µM]	Probe 6	Probe 6	Probe 6
		1000	1314000	1449000	1426000		1000	0.4815	0.4583	0.4684									1000	2.72897e+06	3.16168e+06	3.04441e+06
		333.333	1227000	1330000	1394000		333.333	0.4778	0.4758	0.4813									333.333	2.56802e+06	2.79529e+06	2.89632e+06
		111.111	939500	877600	863200		111.111	0.4839	0.4827	0.4762									111.111	1.94152e+06	1.81811e+06	1.81268e+06
		37.037	526500	492800	468200		37.037	0.478	0.494	0.4802									37.037	1.10146e+06	997571	975010
		12.3457	427700	374900	323000		12.3457	0.5157	0.4985	0.4989									12.3457	829358	752056	647424
		4.11523	302300	274500	229400		4.11523	0.5234	0.5174	0.5033									4.11523	577570	530537	455792
		1.37174	244400	217900	206000		1.37174	0.5172	0.4933	0.5122									1.37174	472544	441719	402187
		0.457247	218300	208700	184100		0.457247	0.5161	0.52	0.523									0.457247	422980	401346	352008
		0.152416	185300	200300	179100		0.152416	0.5103	0.4998	0.5141									0.152416	363120	400760	348376
		0	183800	191500	182600		0	0.5315	0.5414	0.5383									0	345814	353713	339216
	LUM						OD												Lum/OD
	75% activation	320 min					75% activation	320 min											75% activation	320 min
		[µM]	Probe 7	Probe 7	Probe 7		[µM]	Probe 7	Probe 7	Probe 7									[µM]	Probe 7	Probe 7	Probe 7
		1000	2213000	2121000	1883000		1000	0.4665	0.4396	0.4498									1000	4.74384e+06	4.82484e+06	4.18631e+06
		333.333	2418000	2470000	2572000		333.333	0.4817	0.4961	0.495									333.333	5.01972e+06	4.97883e+06	5.19596e+06
		111.111	1540000	1618000	1705000		111.111	0.4972	0.5183	0.5179									111.111	3.09735e+06	3.12174e+06	3.29214e+06
		37.037	780300	947400	1256000		37.037	0.5119	0.5233	0.5359									37.037	1.52432e+06	1.81043e+06	2.34372e+06
		12.3457	408800	472400	634600		12.3457	0.5112	0.5225	0.544									12.3457	799687	904115	1.16654e+06
		4.11523	240900	303800	421500		4.11523	0.5155	0.5368	0.5565									4.11523	467313	565946	757412
		1.37174	205100	227000	284800		1.37174	0.5206	0.5303	0.5493									1.37174	393968	428060	518478
		0.457247	189200	213700	244500		0.457247	0.5281	0.5436	0.5419									0.457247	358265	393120	451190
		0.152416	185500	215700	226500		0.152416	0.5209	0.5331	0.5349									0.152416	356114	404615	423444
		0	187200	203500	189300		0	0.539	0.5401	0.5238									0	347310	376782	361397
	LUM						OD												Lum/OD
	75% activation	560 min					75% activation	560 min											75% activation	560 min
		[µM]	Probe 8	Probe 8	Probe 8		[µM]	Probe 8	Probe 8	Probe 8									[µM]	Probe 8	Probe 8	Probe 8
		1000	738800	795500	806800		1000	0.7607	0.89	0.8988									1000	971211	893820	897641
		333.333	811900	867800	822300		333.333	0.878	0.8395	0.8651									333.333	924715	1.03371e+06	950526
		111.111	1128000	1067000	931000		111.111	0.8751	0.8334	0.8648									111.111	1.289e+06	1.2803e+06	1.07655e+06
		37.037	855200	883600	870200		37.037	0.8851	0.8003	0.8047									37.037	966219	1.10409e+06	1.0814e+06
		12.3457	798200	783100	753100		12.3457	0.874	0.8078	0.8204									12.3457	913272	969423	917967
		4.11523	643900	668100	622500		4.11523	0.8609	0.817	0.7913									4.11523	747938	817748	786680
		1.37174	566000	580600	564400		1.37174	0.8679	0.8253	0.8282									1.37174	652149	703502	681478
		0.457247	533300	569300	528900		0.457247	0.806	0.8312	0.8075									0.457247	661663	684913	654985
		0.152416	503800	542900	530200		0.152416	0.7304	0.8362	0.838									0.152416	689759	649247	632697
		0	501600	511300	494500		0	0.6508	0.8313	0.8387									0	770744	615061	589603
	LUM						OD												Lum/OD
	75% activation	560 min					75% activation	560 min											75% activation	560 min
		[µM]	Probe 9	Probe 9	Probe 9		[µM]	Probe 9	Probe 9	Probe 9									[µM]	Probe 9	Probe 9	Probe 9
		1000	1303000	1269000	1173000		1000	0.8819	0.7738	0.7093									1000	1.47749e+06	1.63996e+06	1.65374e+06
		333.333	1517000	1552000	1477000		333.333	0.8862	0.8836	0.8817									333.333	1.7118e+06	1.75645e+06	1.67517e+06
		111.111	1535000	1470000	1353000		111.111	0.8356	0.8608	0.9039									111.111	1.837e+06	1.70771e+06	1.49685e+06
		37.037	1453000	1566000	1663000		37.037	0.8221	0.8367	0.877									37.037	1.76742e+06	1.87164e+06	1.89624e+06
		12.3457	1019000	1040000	1109000		12.3457	0.8283	0.8355	0.8589									12.3457	1.23023e+06	1.24476e+06	1.29119e+06
		4.11523	695700	750000	791700		4.11523	0.8087	0.8308	0.8702									4.11523	860270	902744	909791
		1.37174	594100	607400	640700		1.37174	0.8443	0.8189	0.8522									1.37174	703660	741727	751819
		0.457247	538500	576800	598700		0.457247	0.7938	0.8109	0.8392									0.457247	678382	711308	713418
		0.152416	543300	566300	583500		0.152416	0.7935	0.8067	0.7902									0.152416	684688	701996	738421
		0	530400	564200	556700		0	0.8284	0.8106	0.6777									0	640270	696028	821455
	LUM						OD												Lum/OD
	75% activation	320 min					75% activation	320 min											75% activation	320 min
		[µM]	Probe 10	Probe 10	Probe 10		[µM]	Probe 10	Probe 10	Probe 10									[µM]	Probe 10	Probe 10	Probe 10
		1000	2607000	2851000	2798000		1000	0.4964	0.4898	0.4485									1000	5.25181e+06	5.82074e+06	6.23857e+06
		333.333	3153000	2937000	3012000		333.333	0.4699	0.4208	0.4416									333.333	6.70994e+06	6.97956e+06	6.82065e+06
		111.111	3243000	2667000	2359000		111.111	0.5338	0.4833	0.4743									111.111	6.07531e+06	5.51831e+06	4.97365e+06
		37.037	1683000	1405000	1267000		37.037	0.5385	0.4972	0.4753									37.037	3.12535e+06	2.82582e+06	2.66568e+06
		12.3457	1098000	899700	777900		12.3457	0.5278	0.5118	0.5119									12.3457	2.08033e+06	1.75791e+06	1.51963e+06
		4.11523	544800	483400	399500		4.11523	0.5021	0.5209	0.5017									4.11523	1.08504e+06	928009	796293
		1.37174	310300	305000	265900		1.37174	0.496	0.4935	0.5095									1.37174	625605	618034	521884
		0.457247	230200	244000	225600		0.457247	0.4909	0.484	0.5069									0.457247	468935	504132	445058
		0.152416	191300	222000	210000		0.152416	0.4846	0.4845	0.4964									0.152416	394759	458204	423046
		0	182700	197800	197000		0	0.4879	0.5092	0.5126									0	374462	388452	384315
	LUM						OD												Lum/OD
	75% activation	320 min					75% activation	320 min											75% activation	320 min
		[µM]	Probe 11	Probe 11	Probe 11		[µM]	Probe 11	Probe 11	Probe 11									[µM]	Probe 11	Probe 11	Probe 11
		1000	4007000	3931000	3564000		1000	0.4575	0.457	0.487									1000	8.75847e+06	8.60175e+06	7.31828e+06
		333.333	4670000	5306000	5443000		333.333	0.4508	0.4838	0.5039									333.333	1.03594e+07	1.09673e+07	1.08017e+07
		111.111	4085000	4524000	4608000		111.111	0.4725	0.501	0.4827									111.111	8.6455e+06	9.02994e+06	9.5463e+06
		37.037	2440000	2911000	3730000		37.037	0.4825	0.5177	0.5049									37.037	5.05699e+06	5.62295e+06	7.3876e+06
		12.3457	1166000	1363000	1568000		12.3457	0.5056	0.5203	0.5053									12.3457	2.30617e+06	2.61964e+06	3.10311e+06
		4.11523	448600	559200	698800		4.11523	0.4986	0.5189	0.5074									4.11523	899719	1.07766e+06	1.37722e+06
		1.37174	260800	289200	347200		1.37174	0.4947	0.5026	0.508									1.37174	527188	575408	683465
		0.457247	211400	244300	260500		0.457247	0.501	0.5013	0.4847									0.457247	421956	487333	537446
		0.152416	204700	229400	228100		0.152416	0.4942	0.4927	0.4745									0.152416	414205	465598	480717
		0	199000	212500	183400		0	0.5152	0.4982	0.477									0	386258	426536	384486
	LUM						OD												Lum/OD
	75% activation	360 min					75% activation	360 min											75% activation	360 min
		[µM]	Probe 12	Probe 12	Probe 12		[µM]	Probe 12	Probe 12	Probe 12									[µM]	Probe 12	Probe 12	Probe 12
		1000	4088000	4470000	6012000		1000	0.7402	0.7971	0.8282									1000	5.52283e+06	5.60783e+06	7.25912e+06
		333.333	5367000	5794000	7695000		333.333	0.8179	0.8251	0.8372									333.333	6.56193e+06	7.02218e+06	9.19135e+06
		111.111	4141000	4493000	5733000		111.111	0.8053	0.8115	0.8227									111.111	5.14218e+06	5.53666e+06	6.96852e+06
		37.037	2562000	2822000	3358000		37.037	0.795	0.7982	0.7976									37.037	3.22264e+06	3.53545e+06	4.21013e+06
		12.3457	1369000	1547000	1726000		12.3457	0.7765	0.79	0.7929									12.3457	1.76304e+06	1.95823e+06	2.17682e+06
		4.11523	663400	755300	823600		4.11523	0.747	0.785	0.7866									4.11523	888086	962166	1.04704e+06
		1.37174	370000	430600	472800		1.37174	0.7403	0.7781	0.7864									1.37174	499797	553399	601221
		0.457247	280500	330900	359400		0.457247	0.7212	0.7653	0.7801									0.457247	388935	432379	460710
		0.152416	266900	329000	354100		0.152416	0.7093	0.7604	0.7769									0.152416	376286	432667	455786
		0	230800	307100	303800		0	0.7195	0.7583	0.756									0	320778	404985	401852
	LUM						OD												Lum/OD
	75% activation	260 min					75% activation	260 min											75% activation	260 min
		[µM]	Probe 13	Probe 13	Probe 13		[µM]	Probe 13	Probe 13	Probe 13									[µM]	Probe 13	Probe 13	Probe 13
		1000	25480000	27040000	27440000		1000	0.4039	0.3921	0.3784									1000	6.30849e+07	6.8962e+07	7.25159e+07
		333.333	25640000	28110000	28850000		333.333	0.4193	0.3884	0.3773									333.333	6.11495e+07	7.23738e+07	7.64644e+07
		111.111	23840000	26600000	27270000		111.111	0.4439	0.4118	0.3868									111.111	5.37058e+07	6.45945e+07	7.05016e+07
		37.037	21790000	23980000	24500000		37.037	0.4664	0.4449	0.4076									37.037	4.67196e+07	5.38998e+07	6.01079e+07
		12.3457	16840000	18250000	18320000		12.3457	0.494	0.4779	0.4297									12.3457	3.40891e+07	3.81879e+07	4.26344e+07
		4.11523	8032000	8631000	8856000		4.11523	0.5144	0.4993	0.4505									4.11523	1.56143e+07	1.72862e+07	1.96582e+07
		1.37174	2680000	2817000	2629000		1.37174	0.5226	0.5093	0.4606									1.37174	5.12821e+06	5.53112e+06	5.70777e+06
		0.457247	886100	913500	830000		0.457247	0.5243	0.5068	0.4517									0.457247	1.69006e+06	1.80249e+06	1.8375e+06
		0.152416	449900	460900	399400		0.152416	0.5243	0.4767	0.438									0.152416	858097	966855	911872
		0	272200	272600	228000		0	0.493	0.4205	0.4032									0	552130	648276	565476
	LUM						OD												Lum/OD
	75% activation	280 min					75% activation	280 min											75% activation	280 min
		[µM]	Probe 14	Probe 14	Probe 14		[µM]	Probe 14	Probe 14	Probe 14									[µM]	Probe 14	Probe 14	Probe 14
		1000	21770000	22320000	21820000		1000	0.4549	0.4337	0.4184									1000	4.78567e+07	5.14641e+07	5.21511e+07
		333.333	23690000	26200000	26640000		333.333	0.4787	0.4226	0.4149									333.333	4.94882e+07	6.19972e+07	6.42082e+07
		111.111	21640000	24730000	25570000		111.111	0.488	0.4354	0.4105									111.111	4.43443e+07	5.67983e+07	6.22899e+07
		37.037	19280000	21770000	22740000		37.037	0.504	0.4675	0.4245									37.037	3.8254e+07	4.65668e+07	5.35689e+07
		12.3457	14540000	15930000	16880000		12.3457	0.5159	0.4974	0.4389									12.3457	2.81838e+07	3.20265e+07	3.84598e+07
		4.11523	7385000	8008000	8124000		4.11523	0.5299	0.5161	0.4485									4.11523	1.39366e+07	1.55164e+07	1.81137e+07
		1.37174	2722000	2981000	2961000		1.37174	0.5405	0.5248	0.4603									1.37174	5.03608e+06	5.68026e+06	6.43276e+06
		0.457247	952300	1032000	987400		0.457247	0.5446	0.5192	0.461									0.457247	1.74862e+06	1.98767e+06	2.14187e+06
		0.152416	431700	450200	410300		0.152416	0.5401	0.4896	0.4523									0.152416	799296	919526	907141
		0	197100	217300	197400		0	0.4679	0.4497	0.4073									0	421244	483211	484655

## Sheet: Probes comparison
		LUM						LUM						LUM						LUM						LUM						LUM						LUM						LUM
		75% activation	320 min					75% activation	360 min					75% activation	340 min					75% activation	340 min					75% activation	340 min					75% activation	320 min					75% activation	320 min					75% activation	560 min
		[µM]	1-C4HSL	1-C4HSL	1-C4HSL	stdeva		[µM]	Probe 2	Probe 2	Probe 2	stdeva		[µM]	Probe 3	Probe 3	Probe 3	stdeva		[µM]	Probe 4	Probe 4	Probe 4	stdeva		[µM]	Probe 5	Probe 5	Probe 5	stdeva		[µM]	Probe 6	Probe 6	Probe 6	stdeva		[µM]	Probe 7	Probe 7	Probe 7	stdeva		[µM]	Probe 8	Probe 8	Probe 8	stdeva
		1000	11990000	12350000	12310000	197315		1000	11770000	12570000	12760000	525389		1000	12940000	12830000	12560000	195533		1000	5984000	6509000	6717000	377752		1000	7360000	7305000	6693000	370238		1000	1314000	1449000	1426000	72224.2		1000	2213000	2121000	1883000	170298		1000	738800	795500	806800	36438.5
		333.333	14830000	15190000	15370000	274955		333.333	16690000	17330000	17390000	387986		333.333	16440000	16780000	17190000	375544		333.333	7528000	7709000	7795000	136288		333.333	8764000	9200000	9353000	305621		333.333	1227000	1330000	1394000	84255.6		333.333	2418000	2470000	2572000	78341.1		333.333	811900	867800	822300	29730
		111.111	17410000	15860000	15190000	1.1387e+06		111.111	19730000	18640000	18500000	673375		111.111	16570000	17360000	17470000	490951		111.111	8122000	7325000	6875000	631495		111.111	8057000	8482000	8863000	403200		111.111	939500	877600	863200	40539.4		111.111	1540000	1618000	1705000	82540.9		111.111	1128000	1067000	931000	100851
		37.037	15920000	14480000	14070000	971614		37.037	18870000	17660000	18370000	608030		37.037	16140000	18200000	21340000	2.61863e+06		37.037	5390000	4982000	4889000	266494		37.037	5990000	6934000	8592000	1.31723e+06		37.037	526500	492800	468200	29268.1		37.037	780300	947400	1256000	241332		37.037	855200	883600	870200	14207.5
		12.3457	15790000	13290000	12110000	1.87904e+06		12.3457	19360000	17140000	16550000	1.4817e+06		12.3457	13010000	14400000	16200000	1.59939e+06		12.3457	3492000	2951000	2591000	453520		12.3457	3097000	3596000	3653000	305883		12.3457	427700	374900	323000	52350.6		12.3457	408800	472400	634600	116433		12.3457	798200	783100	753100	22956.6
		4.11523	9564000	8078000	7190000	1.19949e+06		4.11523	12370000	10240000	9837000	1.36109e+06		4.11523	6845000	8191000	9798000	1.47842e+06		4.11523	1645000	1440000	1175000	235637		4.11523	1156000	1435000	1907000	379611		4.11523	302300	274500	229400	36790.5		4.11523	240900	303800	421500	91675.2		4.11523	643900	668100	622500	22814.3
		1.37174	5154000	4195000	3507000	827208		1.37174	5592000	4928000	4417000	589158		1.37174	3195000	3695000	4389000	599621		1.37174	707400	614700	506700	100447		1.37174	446500	528000	694300	126295		1.37174	244400	217900	206000	19657.1		1.37174	205100	227000	284800	41175.5		1.37174	566000	580600	564400	8927.11
		0.457247	2095000	1614000	1248000	424799		0.457247	2022000	1757000	1607000	210139		0.457247	1112000	1317000	1635000	263527		0.457247	328900	297200	249700	39861.8		0.457247	240400	291700	355500	57663		0.457247	218300	208700	184100	17639.7		0.457247	189200	213700	244500	27709.7		0.457247	533300	569300	528900	22164.2
		0.152416	686300	501500	403700	143515		0.152416	651500	625500	587300	32292.6		0.152416	440500	520100	616200	87979		0.152416	224800	227600	208800	10143		0.152416	204500	243300	265500	30874.2		0.152416	185300	200300	179100	10900.2		0.152416	185500	215700	226500	21251.2		0.152416	503800	542900	530200	19946
		0	166900	144000	144400	13107.4		0	181800	200800	192600	9529.6		0	204000	219400	200100	10205.1		0	187400	181700	172100	7732.4		0	164000	198400	181400	17200.4		0	183800	191500	182600	4829.42		0	187200	203500	189300	8866.98		0	501600	511300	494500	8433.47
		OD						OD						OD						OD						OD						OD						OD						OD
		75% activation	320 min					75% activation	360 min					75% activation	340 min					75% activation	340 min					75% activation	340 min					75% activation	320 min					75% activation	320 min					75% activation	560 min
		[µM]	1-C4HSL	1-C4HSL	1-C4HSL	stdeva		[µM]	Probe 2	Probe 2	Probe 2	stdeva		[µM]	Probe 3	Probe 3	Probe 3	stdeva		[µM]	Probe 4	Probe 4	Probe 4	stdeva		[µM]	Probe 5	Probe 5	Probe 5	stdeva		[µM]	Probe 6	Probe 6	Probe 6	stdeva		[µM]	Probe 7	Probe 7	Probe 7	stdeva		[µM]	Probe 8	Probe 8	Probe 8	stdeva
		1000	0.4778	0.4704	0.4516	0.013507		1000	0.5576	0.517	0.5048	0.0276437		1000	0.4637	0.4778	0.4829	0.00994535		1000	0.5274	0.5039	0.4882	0.0197289		1000	0.4837	0.4973	0.5074	0.011893		1000	0.4815	0.4583	0.4684	0.0116323		1000	0.4665	0.4396	0.4498	0.0135803		1000	0.7607	0.89	0.8988	0.077317
		333.333	0.4384	0.4316	0.434	0.00344867		333.333	0.5013	0.4818	0.4777	0.0126097		333.333	0.4592	0.4939	0.4763	0.0173506		333.333	0.5094	0.5056	0.5026	0.00340783		333.333	0.4763	0.5064	0.5036	0.016629		333.333	0.4778	0.4758	0.4813	0.00278388		333.333	0.4817	0.4961	0.495	0.00801519		333.333	0.878	0.8395	0.8651	0.019596
		111.111	0.4797	0.4518	0.4473	0.0175519		111.111	0.5398	0.4987	0.4844	0.0287601		111.111	0.4615	0.4662	0.4664	0.00277308		111.111	0.5498	0.514	0.5024	0.0247082		111.111	0.4923	0.5148	0.5271	0.0176474		111.111	0.4839	0.4827	0.4762	0.00414287		111.111	0.4972	0.5183	0.5179	0.0120683		111.111	0.8751	0.8334	0.8648	0.0217215
		37.037	0.4983	0.4601	0.4432	0.0282278		37.037	0.5256	0.4805	0.4851	0.0248174		37.037	0.4739	0.4851	0.504	0.0152133		37.037	0.553	0.5206	0.5018	0.0258993		37.037	0.5115	0.5345	0.5701	0.0295249		37.037	0.478	0.494	0.4802	0.00867256		37.037	0.5119	0.5233	0.5359	0.012005		37.037	0.8851	0.8003	0.8047	0.0477399
		12.3457	0.4986	0.4787	0.4654	0.016709		12.3457	0.5404	0.5148	0.5077	0.0172001		12.3457	0.4867	0.495	0.5139	0.01394		12.3457	0.5464	0.5168	0.5085	0.0199226		12.3457	0.5042	0.5334	0.5378	0.0182618		12.3457	0.5157	0.4985	0.4989	0.00981699		12.3457	0.5112	0.5225	0.544	0.0166622		12.3457	0.874	0.8078	0.8204	0.0351524
		4.11523	0.4981	0.4831	0.4715	0.0133362		4.11523	0.5313	0.5084	0.509	0.0130516		4.11523	0.4881	0.5156	0.5297	0.0211566		4.11523	0.5426	0.5245	0.5106	0.0160459		4.11523	0.5177	0.5494	0.5639	0.0236276		4.11523	0.5234	0.5174	0.5033	0.0103184		4.11523	0.5155	0.5368	0.5565	0.0205052		4.11523	0.8609	0.817	0.7913	0.0351944
		1.37174	0.5049	0.471	0.4777	0.0179534		1.37174	0.5287	0.489	0.5192	0.0207299		1.37174	0.4894	0.5009	0.5182	0.014497		1.37174	0.5329	0.5147	0.5315	0.0101278		1.37174	0.5209	0.5399	0.5625	0.0208259		1.37174	0.5172	0.4933	0.5122	0.0126057		1.37174	0.5206	0.5303	0.5493	0.014599		1.37174	0.8679	0.8253	0.8282	0.0238022
		0.457247	0.5027	0.4611	0.4735	0.0213579		0.457247	0.5151	0.4931	0.5224	0.0152522		0.457247	0.4945	0.5088	0.5089	0.00828513		0.457247	0.532	0.5059	0.532	0.0150688		0.457247	0.5362	0.5493	0.5485	0.00734325		0.457247	0.5161	0.52	0.523	0.00345977		0.457247	0.5281	0.5436	0.5419	0.00850078		0.457247	0.806	0.8312	0.8075	0.0141361
		0.152416	0.4854	0.4459	0.4714	0.0200271		0.152416	0.5049	0.5038	0.5053	0.000776745		0.152416	0.4866	0.5043	0.4934	0.00892879		0.152416	0.517	0.5022	0.5255	0.0117911		0.152416	0.5316	0.5433	0.54	0.00603241		0.152416	0.5103	0.4998	0.5141	0.00740698		0.152416	0.5209	0.5331	0.5349	0.00761665		0.152416	0.7304	0.8362	0.838	0.0616098
		0	0.4728	0.4768	0.4983	0.0137143		0	0.489	0.5342	0.5214	0.0232975		0	0.4966	0.4933	0.478	0.00992421		0	0.5224	0.5382	0.5522	0.0149091		0	0.5498	0.5424	0.5115	0.0203161		0	0.5315	0.5414	0.5383	0.00506392		0	0.539	0.5401	0.5238	0.00910988		0	0.6508	0.8313	0.8387	0.106412
	Avg LUM
				1-C4HSL	Probe 2	Probe 3	Probe 4	Probe 5	Probe 6	Probe 7	Probe 8	Probe 9	Probe 10	Probe 11	Probe 12	Probe 13	Probe 14
			1000	1.22167e+07	1.23667e+07	1.27767e+07	6.40333e+06	7.11933e+06	1.39633e+06	2.07233e+06	780367	1.24833e+06	2752000	3834000	4.85667e+06	2.66533e+07	21970000
			333.333	15130000	1.71367e+07	1.68033e+07	7.67733e+06	9.10567e+06	1317000	2.48667e+06	834000	1.51533e+06	3034000	5.13967e+06	6.28533e+06	2.75333e+07	25510000
			111.111	1.61533e+07	1.89567e+07	1.71333e+07	7.44067e+06	8.46733e+06	893433	1621000	1042000	1.45267e+06	2.75633e+06	4.40567e+06	4789000	2.59033e+07	23980000
			37.037	1.48233e+07	18300000	18560000	5087000	7172000	495833	994567	869667	1.56067e+06	1.45167e+06	3027000	2914000	2.34233e+07	2.12633e+07
			12.3457	13730000	1.76833e+07	1.45367e+07	3.01133e+06	3.44867e+06	375200	505267	778133	1056000	925200	1.36567e+06	1.54733e+06	1.78033e+07	1.57833e+07
			4.11523	8.27733e+06	1.08157e+07	8278000	1420000	1.49933e+06	268733	322067	644833	745800	475900	568867	747433	8.50633e+06	7839000
			1.37174	4.28533e+06	4979000	3.75967e+06	609600	556267	222767	238967	570333	614067	293733	299067	424467	2.70867e+06	2888000
			0.457247	1.65233e+06	1.79533e+06	1.35467e+06	291933	295867	203700	215800	543833	571333	233267	238733	323600	876533	990567
			0.152416	530500	621433	525600	220400	237767	188233	209233	525633	564367	207767	220733	316667	436733	430733
			0	151767	191733	207833	180400	181267	185967	193333	502467	550433	192500	198300	280567	257600	203933
	Avg OD
				1-C4HSL	Probe 2	Probe 3	Probe 4	Probe 5	Probe 6	Probe 7	Probe 8	Probe 9	Probe 10	Probe 11	Probe 12	Probe 13	Probe 14
			1000	0.4666	0.526467	0.4748	0.5065	0.496133	0.4694	0.451967	0.849833	0.788333	0.478233	0.467167	0.7885	0.391467	0.435667
			333.333	0.434667	0.486933	0.476467	0.505867	0.495433	0.4783	0.490933	0.860867	0.883833	0.4441	0.4795	0.826733	0.395	0.438733
			111.111	0.4596	0.507633	0.4647	0.522067	0.5114	0.480933	0.511133	0.857767	0.866767	0.497133	0.4854	0.813167	0.414167	0.444633
			37.037	0.4672	0.497067	0.487667	0.525133	0.5387	0.484067	0.5237	0.830033	0.845267	0.503667	0.5017	0.796933	0.439633	0.465333
			12.3457	0.4809	0.520967	0.498533	0.5239	0.525133	0.504367	0.5259	0.834067	0.8409	0.517167	0.5104	0.786467	0.4672	0.484067
			4.11523	0.484233	0.516233	0.511133	0.5259	0.543667	0.5147	0.536267	0.823067	0.836567	0.508233	0.5083	0.772867	0.488067	0.498167
			1.37174	0.484533	0.5123	0.502833	0.526367	0.5411	0.507567	0.5334	0.840467	0.838467	0.499667	0.501767	0.768267	0.4975	0.508533
			0.457247	0.4791	0.5102	0.504067	0.5233	0.544667	0.5197	0.537867	0.8149	0.814633	0.493933	0.495667	0.755533	0.494267	0.508267
			0.152416	0.467567	0.504667	0.494767	0.5149	0.5383	0.508067	0.529633	0.801533	0.7968	0.4885	0.487133	0.748867	0.479667	0.494
			0	0.482633	0.514867	0.4893	0.5376	0.534567	0.537067	0.5343	0.7736	0.772233	0.503233	0.4968	0.7446	0.4389	0.441633
	Avg LUM /Avg OD
				1-C4HSL	Probe 2	Probe 3	Probe 4	Probe 5	Probe 6	Probe 7	Probe 8	Probe 9	Probe 10	Probe 11	Probe 12	Probe 13	Probe 14		stdeva LUM		1-C4HSL	Probe 2	Probe 3	Probe 4	Probe 5	Probe 6	Probe 7	Probe 8	Probe 9	Probe 10	Probe 11	Probe 12	Probe 13	Probe 14
			1000	2.61823e+07	2.34899e+07	2.69096e+07	1.26423e+07	1.43496e+07	2.97472e+06	4.58515e+06	918258	1.58351e+06	5.75451e+06	8.20692e+06	6.15937e+06	6.80858e+07	5.04285e+07			1000	197315	525389	195533	377752	370238	72224.2	170298	36438.5	67419.1	128339	236894	1.01862e+06	1.03563e+06	304138
			333.333	3.48083e+07	3.5193e+07	3.52665e+07	1.51766e+07	1.83792e+07	2.7535e+06	5.06518e+06	968791	1.7145e+06	6.83179e+06	1.07188e+07	7.60261e+06	6.97046e+07	5.81447e+07			333.333	274955	387986	375544	136288	305621	84255.6	78341.1	29730	37527.8	109668	412471	1.23934e+06	1.6809e+06	1.59145e+06
			111.111	3.51465e+07	3.73432e+07	3.68697e+07	1.42523e+07	1.65572e+07	1.85771e+06	3.17138e+06	1.21478e+06	1.67596e+06	5.54445e+06	9.07636e+06	5.88932e+06	6.25433e+07	5.39321e+07			111.111	1.1387e+06	673375	490951	631495	403200	40539.4	82540.9	100851	92229.8	448720	280864	836258	1.81803e+06	2.06957e+06
			37.037	3.1728e+07	3.6816e+07	3.80588e+07	9.68706e+06	1.33135e+07	1.02431e+06	1.89912e+06	1.04775e+06	1.84636e+06	2.8822e+06	6.03349e+06	3.65652e+06	5.32792e+07	4.56948e+07			37.037	971614	608030	2.61863e+06	266494	1.31723e+06	29268.1	241332	14207.5	105102	211890	652776	405897	1.4382e+06	1.78478e+06
			12.3457	2.85506e+07	3.39433e+07	2.91589e+07	5.74792e+06	6.56722e+06	743903	960766	932939	1.2558e+06	1.78898e+06	2.67568e+06	1.96745e+06	3.81064e+07	3.26057e+07			12.3457	1.87904e+06	1.4817e+06	1.59939e+06	453520	305883	52350.6	116433	22956.6	47085	161566	201013	178500	835005	1.17687e+06
			4.11523	1.70937e+07	2.09511e+07	1.61954e+07	2.70013e+06	2.75782e+06	522116	600572	783452	891501	936381	1.11916e+06	967092	1.74286e+07	1.57357e+07			4.11523	1.19949e+06	1.36109e+06	1.47842e+06	235637	379611	36790.5	91675.2	22814.3	48137.6	72939.8	125380	80389.2	425911	397430
			1.37174	8.84425e+06	9.71891e+06	7.47696e+06	1.15813e+06	1.02803e+06	438891	448006	678591	732369	587859	596027	552499	5.44456e+06	5.67908e+06			1.37174	827208	589158	599621	100447	126295	19657.1	41175.5	8927.11	24004.7	24249.6	44037	51673.7	97223.1	144108
			0.457247	3.44883e+06	3.51888e+06	2.68748e+06	557870	543207	391957	401215	667362	701338	472263	481641	428307	1.7734e+06	1.94891e+06			0.457247	424799	210139	263527	39861.8	57663	17639.7	27709.7	22164.2	30470	9575.66	25018.9	39953.3	42564.1	39944.3
			0.152416	1.1346e+06	1.23137e+06	1.06232e+06	428044	441699	370489	395053	655785	708291	425316	453127	422861	910493	871930			0.152416	143515	32292.6	87979	10143	30874.2	10900.2	21251.2	19946	20169.6	15471.4	13900.5	44889.2	32796.1	19967.6
			0	314455	372394	424756	335565	339091	346264	361844	649517	712781	382526	399155	376802	586922	461771			0	13107.4	9529.6	10205.1	7732.4	17200.4	4829.42	8866.98	8433.47	17750	8496.47	14562.6	43130.8	25635.1	11576.8
			Max	3.51465e+07	3.73432e+07	3.80588e+07	1.51766e+07	1.83792e+07	2.97472e+06	5.06518e+06	1.21478e+06	1.84636e+06	6.83179e+06	1.07188e+07	7.60261e+06	6.97046e+07	5.81447e+07
	stdeva (LUM)/average (OD)
				1-C4HSL	Probe 2	Probe 3	Probe 4	Probe 5	Probe 6	Probe 7	Probe 8	Probe 9	Probe 10	Probe 11	Probe 12	Probe 13	Probe 14
			1000	422879	997953	411823	745808	746247	153865	376793	42877.2	85521	268361	507088	1.29184e+06	2.64552e+06	698098
			333.333	632564	796795	788185	269414	616877	176156	159576	34534.9	42460.2	246944	860211	1.49908e+06	4.25545e+06	3.62736e+06
			111.111	2.47759e+06	1.3265e+06	1.05649e+06	1.20961e+06	788424	84293.2	161486	117574	106407	902614	578623	1.0284e+06	4.38961e+06	4.65454e+06
			37.037	2.07965e+06	1.22324e+06	5.3697e+06	507479	2.44519e+06	60463	460821	17116.8	124341	420695	1.30113e+06	509323	3.27137e+06	3.83548e+06
			12.3457	3.90735e+06	2.84413e+06	3.20818e+06	865661	582486	103795	221397	27523.6	55993.6	312407	393835	226965	1.78725e+06	2.43122e+06
			4.11523	2.47708e+06	2.63658e+06	2.89244e+06	448065	698242	71479.6	170951	27718.7	57541.9	143516	246665	104014	872650	797786
			1.37174	1.70723e+06	1.15003e+06	1.19248e+06	190831	233404	38728.2	77194.4	10621.6	28629.2	48531.6	87763.8	67260.1	195423	283379
			0.457247	886661	411875	522801	76173.9	105868	33942.1	51517.9	27198.7	37403.4	19386.6	50475.2	52881	86115.7	78589.2
			0.152416	306939	63988	177819	19698.9	57354.9	21454.2	40124.4	24884.8	25313.3	31671.2	28535.3	59942.9	68372.7	40420.2
			0	27158	18508.9	20856.5	14383.2	32176.3	8992.22	16595.5	10901.6	22985.3	16883.8	29312.8	57924.8	58407.7	26213.7
			Max	stdeva (LUM)/average (OD)
		1	3.51465e+07	2.47759e+06
		2	3.73432e+07	1.3265e+06
		3	3.80588e+07	5.3697e+06
		4	1.51766e+07	269414
		5	1.83792e+07	616877
		6	2.97472e+06	153865
		7	5.06518e+06	159576
		8	1.21478e+06	117574
		9	1.84636e+06	124341
		10	6.83179e+06	246944
		11	1.07188e+07	860211
		12	7.60261e+06	1.49908e+06
		13	6.97046e+07	4.25545e+06
		14	5.81447e+07	3.62736e+06
[truncated: 30 more columns]

## Sheet: Final Lum|OD600
		LUM						LUM						LUM						LUM
		75% activation	320 min					75% activation	360 min					75% activation	260 min					75% activation	280 min
		[µM]	1-C4HSL	1-C4HSL	1-C4HSL			[µM]	Probe 12	Probe 12	Probe 12			[µM]	Probe 13	Probe 13	Probe 13			[µM]	Probe 14	Probe 14	Probe 14
		1000	11990000	12350000	12310000			1000	4088000	4470000	6012000			1000	25480000	27040000	27440000			1000	21770000	22320000	21820000
		333.333	14830000	15190000	15370000			333.333	5367000	5794000	7695000			333.333	25640000	28110000	28850000			333.333	23690000	26200000	26640000
		111.111	17410000	15860000	15190000			111.111	4141000	4493000	5733000			111.111	23840000	26600000	27270000			111.111	21640000	24730000	25570000
		37.037	15920000	14480000	14070000			37.037	2562000	2822000	3358000			37.037	21790000	23980000	24500000			37.037	19280000	21770000	22740000
		12.3457	15790000	13290000	12110000			12.3457	1369000	1547000	1726000			12.3457	16840000	18250000	18320000			12.3457	14540000	15930000	16880000
		4.11523	9564000	8078000	7190000			4.11523	663400	755300	823600			4.11523	8032000	8631000	8856000			4.11523	7385000	8008000	8124000
		1.37174	5154000	4195000	3507000			1.37174	370000	430600	472800			1.37174	2680000	2817000	2629000			1.37174	2722000	2981000	2961000
		0.457247	2095000	1614000	1248000			0.457247	280500	330900	359400			0.457247	886100	913500	830000			0.457247	952300	1032000	987400
		0.152416	686300	501500	403700			0.152416	266900	329000	354100			0.152416	449900	460900	399400			0.152416	431700	450200	410300
		0	166900	144000	144400			0	230800	307100	303800			0	272200	272600	228000			0	197100	217300	197400
		OD						OD						OD						OD
		75% activation	320 min					75% activation	360 min					75% activation	260 min					75% activation	280 min
		[µM]	1-C4HSL	1-C4HSL	1-C4HSL			[µM]	Probe 12	Probe 12	Probe 12			[µM]	Probe 13	Probe 13	Probe 13			[µM]	Probe 14	Probe 14	Probe 14
		1000	0.4778	0.4704	0.4516			1000	0.7402	0.7971	0.8282			1000	0.4039	0.3921	0.3784			1000	0.4549	0.4337	0.4184
		333.333	0.4384	0.4316	0.434			333.333	0.8179	0.8251	0.8372			333.333	0.4193	0.3884	0.3773			333.333	0.4787	0.4226	0.4149
		111.111	0.4797	0.4518	0.4473			111.111	0.8053	0.8115	0.8227			111.111	0.4439	0.4118	0.3868			111.111	0.488	0.4354	0.4105
		37.037	0.4983	0.4601	0.4432			37.037	0.795	0.7982	0.7976			37.037	0.4664	0.4449	0.4076			37.037	0.504	0.4675	0.4245
		12.3457	0.4986	0.4787	0.4654			12.3457	0.7765	0.79	0.7929			12.3457	0.494	0.4779	0.4297			12.3457	0.5159	0.4974	0.4389
		4.11523	0.4981	0.4831	0.4715			4.11523	0.747	0.785	0.7866			4.11523	0.5144	0.4993	0.4505			4.11523	0.5299	0.5161	0.4485
		1.37174	0.5049	0.471	0.4777			1.37174	0.7403	0.7781	0.7864			1.37174	0.5226	0.5093	0.4606			1.37174	0.5405	0.5248	0.4603
		0.457247	0.5027	0.4611	0.4735			0.457247	0.7212	0.7653	0.7801			0.457247	0.5243	0.5068	0.4517			0.457247	0.5446	0.5192	0.461
		0.152416	0.4854	0.4459	0.4714			0.152416	0.7093	0.7604	0.7769			0.152416	0.5243	0.4767	0.438			0.152416	0.5401	0.4896	0.4523
		0	0.4728	0.4768	0.4983			0	0.7195	0.7583	0.756			0	0.493	0.4205	0.4032			0	0.4679	0.4497	0.4073
		Lum/OD						Lum/OD						Lum/OD						Lum/OD
		75% activation	320 min					75% activation	360 min					75% activation	260 min					75% activation	280 min
		[µM]	1-C4HSL	1-C4HSL	1-C4HSL			[µM]	Probe 12	Probe 12	Probe 12			[µM]	Probe 13	Probe 13	Probe 13			[µM]	Probe 14	Probe 14	Probe 14
		1000	2.50942e+07	2.62543e+07	2.72586e+07			1000	5.52283e+06	5.60783e+06	7.25912e+06			1000	6.30849e+07	6.8962e+07	7.25159e+07			1000	4.78567e+07	5.14641e+07	5.21511e+07
		333.333	3.38276e+07	3.51946e+07	3.54147e+07			333.333	6.56193e+06	7.02218e+06	9.19135e+06			333.333	6.11495e+07	7.23738e+07	7.64644e+07			333.333	4.94882e+07	6.19972e+07	6.42082e+07
		111.111	3.62935e+07	3.5104e+07	3.39593e+07			111.111	5.14218e+06	5.53666e+06	6.96852e+06			111.111	5.37058e+07	6.45945e+07	7.05016e+07			111.111	4.43443e+07	5.67983e+07	6.22899e+07
		37.037	3.19486e+07	3.14714e+07	3.17464e+07			37.037	3.22264e+06	3.53545e+06	4.21013e+06			37.037	4.67196e+07	5.38998e+07	6.01079e+07			37.037	3.8254e+07	4.65668e+07	5.35689e+07
		12.3457	3.16687e+07	2.77627e+07	2.60206e+07			12.3457	1.76304e+06	1.95823e+06	2.17682e+06			12.3457	3.40891e+07	3.81879e+07	4.26344e+07			12.3457	2.81838e+07	3.20265e+07	3.84598e+07
		4.11523	1.9201e+07	1.67212e+07	1.52492e+07			4.11523	888086	962166	1.04704e+06			4.11523	1.56143e+07	1.72862e+07	1.96582e+07			4.11523	1.39366e+07	1.55164e+07	1.81137e+07
		1.37174	1.0208e+07	8.90658e+06	7.34143e+06			1.37174	499797	553399	601221			1.37174	5.12821e+06	5.53112e+06	5.70777e+06			1.37174	5.03608e+06	5.68026e+06	6.43276e+06
		0.457247	4.1675e+06	3.50033e+06	2.63569e+06			0.457247	388935	432379	460710			0.457247	1.69006e+06	1.80249e+06	1.8375e+06			0.457247	1.74862e+06	1.98767e+06	2.14187e+06
		0.152416	1.41389e+06	1.12469e+06	856385			0.152416	376286	432667	455786			0.152416	858097	966855	911872			0.152416	799296	919526	907141
		0	353003	302013	289785			0	320778	404985	401852			0	552130	648276	565476			0	421244	483211	484655
