# Supplementary material for: Short-chain reactive probes as tools to unravel the Pseudomonas aeruginosa quorum sensing regulon
Source: Royal Society of Chemistry journal article supplement (doi:10.1039/d0sc04444j), 2021-01-01
Supplement: d0sc04444j2.zip [file Pyocyanin.xlsx]

## Sheet: Key
Pyocyanin	Pyocyanin assays for wild-type P. aeruginosa PAO1, PW4328 and PW4329 transposon mutants with increasing concentrations of C4HSL
Experimental methods	Bacteria were grown and incubated in triplicates in the presence of C4HSL; OD600 and pyocyanin production (OD520) was measured
Excel sheets content
Pyocyanin asssays	Pyocyanin assays averaged results for Wild-type P. aeruginosa PAO1, PW4328 and PW4329 transposon mutants- the graphs show the pyocyanin (OD520), growth (OD600), and OD520\ OD600 results of the triplicate experiments and the comparison between the different phenotypes
Abbreviations	Pyo=Pyocyanin WT=Wild type

## Sheet: Pyocyanin asssays
	[μM]	1	2	3	Average pyo OD520-WT	Stdeva			[μM]	1	2	3	Average OD600-WT	Stdeva			[μM]	Average pyo OD520-WT	Average OD600-WT	OD520-WT/OD600-WT	Stdeva Average pyo OD520-WT/Average OD600-WT
	0	0.411	0.208	0.37	0.329667	0.0536711			0	2.584	2.724	2.865	2.72433	0.0702501			0	0.329667	2.72433	0.121008	0.0197006
	1	0.386	0.319	0.335	0.346667	0.0174952			1	2.675	2.647	2.625	2.649	0.01253			1	0.346667	2.649	0.130867	0.00660447
	10	0.208	0.245	0.205	0.219333	0.0111393			10	2.536	2.661	2.491	2.56267	0.0440407			10	0.219333	2.56267	0.0855879	0.00434675
	50	0.15	0.125	0.234	0.169667	0.0285497			50	2.735	2.589	2.798	2.70733	0.0536058			50	0.169667	2.70733	0.0626693	0.0105453
	100	0.114	0.196	0.117	0.142333	0.0232504			100	2.673	2.79	2.583	2.682	0.0518965			100	0.142333	2.682	0.0530698	0.00866907
	[μM]	1	2	3	Average pyo OD520-PW4328	Stdeva			[μM]	1	2	3	Average OD600-PW4328	Stdeva			[μM]	Average pyo OD520-PW4328	Average OD600-PW4328	OD520- PW4328/OD600- PW4328	Stdeva Average pyo OD520-PW4328 /Average OD600-PW4328
	0	0.041	0.052	0.034	0.0423333	0.00453689			0	2.585	2.585	2.486	2.552	0.0285788			0	0.0423333	2.552	0.0165883	0.00177778
	1	0.047	0.031	0.008	0.0286667	0.00980221			1	2.466	2.583	2.514	2.521	0.0294066			1	0.0286667	2.521	0.0113711	0.00388822
	10	0.037	0.031	0.006	0.0246667	0.00822091			10	2.628	2.518	2.512	2.55267	0.0326548			10	0.0246667	2.55267	0.0096631	0.00322052
	50	0.028	0.03	0.016	0.0246667	0.00378594			50	2.621	2.615	2.606	2.614	0.00377492			50	0.0246667	2.614	0.00943637	0.00144833
	100	0.024	0.03	0.027	0.027	0.0015			100	2.619	2.513	2.619	2.58367	0.0305996			100	0.027	2.58367	0.0104503	0.00058057
	[μM]	1	2	3	Average pyo OD520-PW4329	Stdeva			[μM]	1	2	3	Average OD600-PW4329	Stdeva			[μM]	Average pyo OD520-PW4329	Average OD600-PW4329	OD520- PW4329/OD600- PW4329	Stdeva Average pyo OD520-PW4329/Average OD600-PW4329
	0	0.129	0.163	0.122	0.138	0.0109659			0	2.704	2.904	2.856	2.82133	0.0522047			0	0.138	2.82133	0.048913	0.00388676
	1	0.144	0.117	0.078	0.113	0.0165907			1	2.866	2.926	2.808	2.86667	0.0295014			1	0.113	2.86667	0.0394186	0.00578744
	10	0.126	0.138	0.099	0.121	0.00998749			10	2.855	2.736	2.765	2.78533	0.0310255			10	0.121	2.78533	0.0434418	0.00358574
	50	0.13	0.091	0.145	0.122	0.0139374			50	3.036	2.875	2.937	2.94933	0.0406028			50	0.122	2.94933	0.0413653	0.0047256
	100	0.136	0.115	0.128	0.126333	0.00529937			100	2.804	3.112	2.823	2.913	0.0863003			100	0.126333	2.913	0.0433688	0.00181921
